# Supplementary material for: Ruminant-specific retrotransposons shape regulatory evolution of bovine immunity
Source: HighWire-hosted journal article supplement (doi:10.1101/gr.276241.121), 2022-08-01
Supplement: Supplemental_Table_S1.xlsx [file Supplemental_Table_S1.xlsx]

## Sheet: Description
Supplemental Table S1
Wild type RNA-seq alignment statistics and DESeq2 results for MDBK cells, BL3.1 cells, monocytes, leukocytes, alveolar macrophages, and bone marrow derived macrophages
Sheets
Alignment summary	Alignment statistics for each sample
MDBK IFNG 4h vs UT	DESeq2 output for IFNG-stimulated MDBK
BL3.1 IFNG 4h vs UT	DESeq2 output for IFNG-stimulated BL3.1
Monocyte IFNG 2h vs UT	DESeq2 output for IFNG-stimulated monocytes
Leukocyte IFNG 2h vs UT	DESeq2 output for IFNG-stimulated monocytes
Alveolar macrophage MB 24h vs UT	DESeq2 output for alveolar macrophages challenged with M. bovis
Bone marrow derived macrophage LPS 7h vs UT	DESeq2 output for LPS-stimulated BMDMs
Description of "Alignment summary" columns:
Sample	Sample name
Accession ID	Accession ID for publicly available data
Number of reads	Number of reads
Number of total aligned fragments	Number of aligned fragments after removing fragments with QUAL < 10
Number of fragments assigned to complete RefSeq	Number of fragments assigned to complete RefSeq using featureCounts v1.6.2
RNA-seq data sources
	Accession
MDBK	GSE185082
BL3.1	GSE185082
Monocyte	GSE185082
Leukocyte	GSE185082
Alveolar macrophages	GSE116734
BMDM	PRJEB22535

## Sheet: Alignment summary
Sample	Accession ID	Number of reads	Number of aligned fragments post-filter	Number of fragments assigned to complete RefSeq
MDBK UT rep1	This study	15038383	14019416	12934763
MDBK UT rep2	This study	16530776	15296156	13563983
MDBK UT rep3	This study	14362394	13299449	11957128
MDBK IFNG 4h rep1	This study	16546175	15370584	13834015
MDBK IFNG 4h rep2	This study	14778445	13810681	12538891
MDBK IFNG 4h rep3	This study	18615110	17432166	15951460
BL3.1 UT rep1	This study	14842755	11561623	9203089
BL3.1 UT rep2	This study	18478104	14446254	11048052
BL3.1 UT rep3	This study	17493853	13598209	10794805
BL3.1 IFNG 4h rep1	This study	18319591	14464419	12241902
BL3.1 IFNG 4h rep2	This study	14352701	11581125	9946149
BL3.1 IFNG 4h rep3	This study	26545689	21138434	18441198
monocyte UT rep1	This study	35906221	31533734	25674748
monocyte UT rep2	This study	38082144	33588699	27584859
monocyte IFNG 2h rep1	This study	38667953	33979827	26823720
monocyte IFNG 2h rep2	This study	27798725	24369492	19419258
leukocyte UT rep1	This study	20429568	17073118	13556885
leukocyte UT rep2	This study	16452453	13771889	9952829
leukocyte UT rep3	This study	23614937	19583939	14012106
leukocyte IFNG 2h rep1	This study	17743372	14599835	9882200
leukocyte IFNG 2h rep2	This study	20360223	16951775	11106530
leukocyte IFNG 2h rep3	This study	24184567	19978048	12353883
alveolar macrophage UT rep1	SRR7478850	39177262	36791416	32822375
alveolar macrophage UT rep2	SRR7478852	44487982	41576825	36398772
alveolar macrophage UT rep3	SRR7478854	44176956	41297376	36407223
alveolar macrophage UT rep4	SRR7478856	42184408	39319195	34478098
alveolar macrophage MB 24h rep1	SRR7478851	44159977	41384721	36727333
alveolar macrophage MB 24h rep2	SRR7478853	43980013	40922845	36080179
alveolar macrophage MB 24h rep3	SRR7478855	46566164	43385868	39013229
alveolar macrophage MB 24h rep4	SRR7478857	43234320	40201333	35583282
BMDM UT rep1	ERR2767251,ERR2767252,ERR2767253,ERR2767254,ERR2767255	94720463	84829162	55610375
BMDM UT rep2	ERR2767261,ERR2767262,ERR2767263,ERR2767264,ERR2767265	111170620	95426412	51114783
BMDM UT rep3	ERR2767271,ERR2767272,ERR2767273,ERR2767274,ERR2767275	119912334	105970625	72567513
BMDM UT rep4	ERR2767281,ERR2767282	126161264	110469926	72003493
BMDM LPS 7h rep1	ERR2767256,ERR2767257,ERR2767258,ERR2767259,ERR2767260	127062487	113076981	67968864
BMDM LPS 7h rep2	ERR2767266,ERR2767267,ERR2767268,ERR2767269,ERR2767270	130121691	118909662	76247069
BMDM LPS 7h rep3	ERR2767276,ERR2767277,ERR2767278,ERR2767279,ERR2767280	115899160	104178795	72043315
BMDM LPS 7h rep4	ERR2767283,ERR2767284	122234866	107690160	72389419

## Sheet: MDBK IFNG 4h vs UT
gene	baseMean	log2FoldChange	lfcSE	stat	pvalue	padj	MDBK_UT_R1	MDBK_UT_R2	MDBK_UT_R3	MDBK_IFNG_4h_R1	MDBK_IFNG_4h_R2	MDBK_IFNG_4h_R3
IRF8	1350.56	4.56203	0.0973879	46.8439	0	0	121.549	111.714	94.8662	2692.89	2434.74	2647.62
NLRC5	2669.55	3.18499	0.0563814	56.4901	0	0	529.752	490.745	569.197	4789.43	4674.96	4963.25
RNF19B	6392.48	3.53594	0.0436473	81.0116	0	0	1079.76	951.567	1013.39	11618.4	11847.7	11844.1
WARS	9225.87	2.48439	0.037728	65.85	0	0	2776.38	2786.87	2831.48	15731.9	15005	16223.6
TAP1	3054.47	1.73919	0.0427502	40.6826	0	0	1422.12	1383.46	1419.64	4690.2	4666.41	4744.98
CIITA	2336.1	5.18396	0.0861837	60.1501	0	0	116.485	128.671	130.581	4532.02	4475.09	4633.76
LOC512486	1190.57	2.94776	0.0719714	40.9574	0	0	263.356	291.255	264.509	2096.54	2085.24	2142.52
LOC524576	2023.6	2.92518	0.0595559	49.1166	0	0	426.435	510.694	475.447	3581.02	3542.02	3605.99
IRF1	7456.58	4.57794	0.047309	96.7669	0	0	591.539	563.559	646.206	14342.7	14341.2	14254.2
ADAMTS1	799.084	3.48954	0.0947565	36.8264	6.98506e-297	9.11899e-294	134.717	128.671	128.348	1510.02	1461.06	1431.69
LOC511531	851.396	3.73065	0.101565	36.7316	2.28739e-295	2.71472e-292	133.704	122.686	100.447	1630.86	1463.2	1657.48
STAT3	2615.62	1.72913	0.0489096	35.3536	8.82667e-274	9.60269e-271	1142.56	1277.73	1216.52	4118.41	3931.07	4007.39
SMAP2	1003.34	2.34567	0.0714298	32.8388	1.64661e-236	1.65358e-233	346.415	333.148	309.152	1705.53	1644.89	1680.9
SBNO2	1133.57	2.1542	0.0670187	32.1432	1.09757e-226	1.02348e-223	430.486	384.018	434.152	1883.35	1840.48	1828.92
PARP14	2047.71	1.77231	0.0566829	31.2671	1.30626e-214	1.13688e-211	904.528	1011.41	863.841	3296.11	3095.26	3115.1
CSF1	1122.87	1.9885	0.0645823	30.7901	3.55177e-208	2.89802e-205	461.887	439.875	454.242	1775.28	1825.52	1780.41
ZNFX1	1445.09	2.0156	0.0661571	30.4669	7.15539e-204	5.49492e-201	537.855	582.51	600.447	2453.17	2140.82	2355.77
TRIM25	1371.67	1.98828	0.0658802	30.1802	4.31286e-200	3.12802e-197	599.642	519.671	537.947	2242.92	2058.52	2271.3
FILIP1L	1961.88	-1.47057	0.0489137	-30.0646	1.40756e-198	9.67142e-196	2854.38	2934.5	2860.5	1026.66	1054.91	1040.32
TRIM56	3100.33	1.22963	0.0418664	29.3703	1.31417e-189	8.57825e-187	1835.39	1866.23	1860.49	4263.82	4332.94	4443.09
FAM110C	1715.06	1.54293	0.0536654	28.7509	8.83803e-182	5.49431e-179	901.489	854.814	872.769	2642.78	2506.35	2512.15
STAT2	1010.71	1.89419	0.0676798	27.9875	2.30488e-172	1.36773e-169	404.151	438.878	443.081	1623	1575.42	1579.71
IL15RA	774.728	2.17269	0.0779914	27.8581	8.58718e-171	4.87416e-168	298.808	269.311	275.67	1278.16	1249.43	1276.98
TUBB3	2164.72	1.30389	0.0476643	27.3557	9.22849e-165	5.01992e-162	1274.24	1231.85	1238.84	3103.55	3005.48	3134.33
IRF9	448.152	3.45844	0.126608	27.3162	2.72014e-164	1.42046e-161	82.0457	70.8189	71.4287	827.22	760.99	876.408
FST	2951.52	1.18468	0.0435054	27.2306	2.82018e-163	1.41605e-160	1822.22	1840.29	1747.77	4062.42	4028.33	4208.1
FLRT2	6186.16	1.03998	0.0385956	26.9455	6.43938e-160	3.11356e-157	4018.21	4054.63	4071.43	8743.77	8153.92	8075
IRF7	739.352	2.28746	0.0855465	26.7393	1.64322e-157	7.66152e-155	254.24	263.327	236.607	1202.51	1156.45	1322.98
SOCS3	474.392	2.84043	0.108747	26.1195	2.18828e-150	9.85105e-148	124.588	98.7475	126.116	850.798	824.049	822.051
IFNAR2	2075.62	1.24915	0.0479275	26.0633	9.52024e-150	4.14289e-147	1211.44	1235.84	1239.96	2965.02	2945.63	2855.85
ITGA2	1251.44	1.72181	0.06713	25.6488	4.35752e-145	1.83508e-142	573.307	594.48	579.242	2073.94	1785.97	1901.67
OAS1Y	332.833	3.68211	0.151242	24.3458	6.41791e-131	2.61831e-128	58.7487	40.8954	44.6429	625.818	584.637	642.253
DTX3L	580.622	2.27757	0.0937091	24.3047	1.74884e-130	6.91852e-128	201.569	215.449	177.456	1023.71	925.586	939.965
RNF122	1135.82	1.53632	0.0636039	24.1544	6.70614e-129	2.57496e-126	621.926	562.562	562.501	1712.4	1647.03	1708.49
TARS	4726.87	0.895445	0.0372005	24.0708	5.05999e-128	1.88737e-125	3279.8	3373.37	3263.4	6203.17	5997.07	6244.41
GTF2B	925.208	1.55156	0.0670251	23.1489	1.49186e-118	5.41005e-116	468.977	482.766	459.822	1373.46	1383.04	1383.19
LOC507055	289.187	4.25882	0.184102	23.133	2.15607e-118	7.60744e-116	36.4647	25.9337	23.4375	536.416	533.334	579.533
SAMD9	382.881	2.71667	0.117561	23.1086	3.79489e-118	1.30375e-115	106.355	102.737	93.7501	702.449	645.559	646.435
ICOSLG	1311.17	1.40152	0.0608308	23.0396	1.86907e-117	6.25661e-115	725.243	701.207	735.492	1956.05	1791.32	1957.7
PARP9	717.048	1.85193	0.081158	22.8188	2.98217e-115	9.73305e-113	283.615	332.151	318.081	1160.27	1066.67	1141.51
PLCH1	809.299	1.79669	0.07878	22.8064	3.95874e-115	1.26052e-112	354.518	380.028	350.447	1354.79	1172.48	1243.53
TEAD4	2481.74	0.991203	0.0437532	22.6544	1.26262e-113	3.92465e-111	1633.82	1683.69	1666.3	3295.12	3301.54	3309.95
LAP3	1248.01	1.34358	0.0593176	22.6506	1.37722e-113	4.18132e-111	693.843	692.23	732.144	1755.63	1775.29	1838.95
TRIM21	720.887	1.71045	0.0756733	22.603	4.04659e-113	1.20064e-110	338.312	341.128	332.59	1105.25	1108.35	1099.69
TRIM16	1129.14	1.44375	0.064411	22.4146	2.83748e-111	8.23184e-109	561.152	614.429	646.206	1663.28	1679.09	1610.65
MX1	648.614	1.89254	0.0845764	22.3767	6.64202e-111	1.88503e-108	303.873	277.291	243.304	1023.71	1013.23	1030.28
LOC100336669	362.178	6.0064	0.268717	22.3521	1.15126e-110	3.1978e-108	11.142	10.9719	11.1607	750.589	711.825	677.377
ADAR	2993.79	1.00569	0.0453124	22.1947	3.86722e-109	1.0518e-106	1935.67	1935.05	2103.8	4102.7	3918.24	3967.25
SLFN11	3750.8	0.946461	0.0428962	22.064	7.01035e-108	1.86776e-105	2522.14	2659.2	2505.58	5150.97	4810.7	4856.2
ITPKC	857.391	1.5566	0.0713956	21.8025	2.19718e-105	5.73684e-103	432.512	451.845	420.76	1311.57	1220.58	1307.09
TRANK1	710.525	2.00976	0.0926034	21.7029	1.92664e-104	4.93182e-102	262.344	289.26	297.992	1169.11	995.058	1249.38
STAT1	1845.1	1.16618	0.0543633	21.4516	4.40782e-102	1.10662e-99	1136.48	1170.01	1106.03	2678.15	2405.88	2574.03
HSD3B1	4091.81	-0.7979	0.037386	-21.3422	4.6083e-101	1.13512e-98	5204.33	5172.77	5208.71	2919.83	3039.68	3005.55
AKAP2	2552.43	1.00177	0.0472369	21.2072	8.18725e-100	1.97934e-97	1613.56	1727.58	1762.28	3404.18	3312.23	3494.76
TLR4	351.207	2.43656	0.115589	21.0795	1.22689e-98	2.91219e-96	111.42	108.722	108.259	585.538	607.082	586.223
CYP24A1	1056.14	1.55141	0.0745364	20.8142	3.22058e-96	7.50798e-94	555.074	530.643	526.786	1718.3	1412.96	1593.09
PNKD	1287.33	1.26236	0.0606578	20.8112	3.4291e-96	7.85384e-94	766.772	720.159	787.948	1799.84	1751.77	1897.49
ISG20	345.852	2.47502	0.119869	20.6477	1.02302e-94	2.30267e-92	102.304	117.699	95.9823	591.433	554.71	612.984
GCLC	6406.26	0.786078	0.0389451	20.1842	1.34697e-90	2.98045e-88	4608.74	4820.67	4680.81	8406.79	7724.26	8196.26
THBS1	32649.7	0.730842	0.0365241	20.0099	4.51861e-89	9.83175e-87	24352.4	25424	23878.4	42942.7	39368.4	39932.6
LOC510185	233.785	5.23262	0.264432	19.7882	3.765e-87	8.05772e-85	16.2065	10.9719	8.92858	435.224	456.38	475
UBA7	236.906	3.21305	0.164775	19.4996	1.10663e-84	2.33018e-82	44.568	40.8954	53.5715	386.101	429.66	466.637
BCL3	442.458	2.0412	0.105285	19.3874	9.86772e-84	2.04481e-81	203.595	161.587	152.902	749.606	690.449	696.611
PHLDA1	4719.8	0.764976	0.0394924	19.3702	1.37714e-83	2.80915e-81	3639.38	3329.49	3523.44	5955.59	5896.6	5974.29
RNF125	787.835	1.50762	0.0781178	19.2993	5.43967e-83	1.09254e-80	423.396	413.942	390.626	1155.36	1259.05	1084.64
HERC6	743.507	1.42442	0.0739501	19.262	1.12041e-82	2.21621e-80	402.125	415.936	391.742	1086.59	1112.63	1052.02
ZC3HAV1	2999.26	0.862244	0.0450068	19.1581	8.2866e-82	1.61465e-79	2127.11	2190.4	2065.85	4021.15	3868.01	3723.06
CDKN2AIP	592.074	1.63958	0.0859779	19.0698	4.50379e-81	8.64661e-79	316.028	284.273	262.277	893.044	871.077	925.748
CD74	1206.27	1.18711	0.0625617	18.975	2.74432e-80	5.19233e-78	770.824	757.064	679.688	1628.9	1668.41	1732.75
ARHGEF5	1740.95	1.00087	0.0527615	18.9696	3.04052e-80	5.67056e-78	1127.37	1208.91	1143.97	2405.03	2249.84	2310.61
IFIH1	286.559	2.69038	0.142319	18.9038	1.06064e-79	1.95023e-77	73.9424	86.7781	69.1965	560.977	485.238	443.222
LOC616254	230.415	2.7904	0.150839	18.4992	2.09703e-76	3.80231e-74	62.8004	55.8572	55.8037	381.189	417.903	408.935
STARD13	1019.49	1.22708	0.0663569	18.4921	2.3892e-76	4.27275e-74	607.746	656.322	564.733	1430.44	1453.58	1404.09
CNN3	5469.19	0.717876	0.0389471	18.432	7.26783e-76	1.28218e-73	4052.65	4250.13	4104.92	7077.54	6567.81	6762.06
CMPK2	209.535	3.05411	0.166277	18.3676	2.38645e-75	4.15401e-73	38.4906	47.8776	49.1072	374.312	352.706	394.718
ZBP1	193.944	4.02418	0.220057	18.287	1.05113e-74	1.80559e-72	26.3356	20.9464	20.0893	323.225	339.88	433.187
DOCK9	1724.29	1.09704	0.060279	18.1994	5.2188e-74	8.84824e-72	1023.04	1170.01	1102.68	2515.06	2232.74	2302.24
FLNB	5554.89	0.674512	0.0375792	17.9491	4.87786e-72	8.16416e-70	4142.8	4352.87	4345.99	6868.28	6622.32	6997.05
IFIT5	1154.07	1.18478	0.0662966	17.871	1.98526e-71	3.2807e-69	705.998	767.039	639.51	1619.07	1644.89	1547.93
EIF2AK2	1493.74	0.947771	0.0533635	17.7607	1.42568e-70	2.32654e-68	1021.01	1035.35	1002.23	1955.07	2013.63	1935.12
PDE3B	2267.12	0.841679	0.0477968	17.6095	2.08159e-69	3.35495e-67	1560.89	1667.74	1641.74	2933.58	2983.04	2815.71
NT5DC3	1624.59	1.09164	0.0620407	17.5956	2.6633e-69	4.24017e-67	936.941	1051.31	1127.23	2304.82	2111.96	2215.27
CISH	223.413	2.56866	0.146776	17.5006	1.41815e-68	2.2306e-66	61.7875	65.8317	65.8483	393.961	370.876	382.174
PLK2	8654.35	-0.595455	0.0340674	-17.4788	2.07979e-68	3.23234e-66	10224.3	10638.8	10381.7	6677.69	7077.63	6925.97
SLC22A5	584.026	1.45155	0.0834397	17.3964	8.78114e-68	1.34868e-65	312.989	334.146	290.179	873.395	837.944	855.502
GBP4	163.511	4.01296	0.230879	17.3812	1.14461e-67	1.73755e-65	19.2453	14.9617	23.4375	278.032	314.229	331.162
DRAM1	547.536	1.46394	0.0845559	17.3133	3.73243e-67	5.60078e-65	304.886	281.281	287.947	792.834	803.742	814.524
GABRP	952.548	1.13154	0.0655528	17.2615	9.17504e-67	1.36114e-64	583.436	611.437	597.099	1295.85	1271.88	1355.59
ATP8B1	1528.28	1.09834	0.0641796	17.1136	1.17552e-65	1.72432e-63	966.316	1013.41	938.617	2293.03	1953.78	2004.53
NMI	1238.86	0.965732	0.0568211	16.996	8.79034e-65	1.27509e-62	837.676	832.87	847.099	1645.6	1622.45	1647.45
APOL3	153.828	4.48068	0.26673	16.7986	2.49958e-63	3.58593e-61	10.1291	9.97449	20.0893	272.138	292.853	317.782
ATF3	673.855	1.24861	0.0753244	16.5764	1.03252e-61	1.46517e-59	391.996	405.962	399.554	933.324	959.788	952.509
HMOX1	1085.28	-1.06034	0.0645684	-16.422	1.33101e-60	1.86842e-58	1534.56	1381.47	1485.49	735.852	681.898	692.429
BOLA-DRB3	988.362	1.06298	0.0647334	16.4209	1.3564e-60	1.88381e-58	650.288	641.36	628.349	1284.06	1337.08	1389.04
ARID5B	1783.53	0.886721	0.0544727	16.2783	1.40809e-59	1.93502e-57	1249.93	1310.65	1193.08	2427.62	2297.93	2221.96
IFI16	217.105	2.38971	0.147383	16.2143	3.99839e-59	5.4374e-57	81.0327	66.8291	60.2679	358.593	380.495	355.414
LIPH	138.567	4.00172	0.249614	16.0316	7.6834e-58	1.03409e-55	9.11618	19.949	20.0893	255.436	245.825	280.986
LIMA1	4195.75	0.626167	0.0397858	15.7385	8.24107e-56	1.09783e-53	3188.64	3438.21	3271.21	5130.33	5003.08	5143.04
RTP4	156.405	2.99116	0.190121	15.7329	8.99581e-56	1.18627e-53	32.4131	36.9056	35.7143	268.208	260.789	304.401
LOC100847890	910.34	1.03925	0.0664955	15.6289	4.62498e-55	6.03791e-53	622.939	602.459	561.385	1222.16	1223.78	1229.31
PRICKLE1	794.945	-1.07938	0.0690887	-15.623	5.07218e-55	6.55617e-53	1086.85	1083.23	1068.08	523.644	492.72	515.141
PDP1	2322.21	0.826709	0.0529694	15.6073	6.49408e-55	8.31178e-53	1616.6	1791.42	1612.73	3114.35	2964.87	2833.27
PPA1	3211.42	0.642533	0.0411959	15.597	7.62636e-55	9.66622e-53	2557.6	2531.53	2433.04	3834.49	3966.34	3945.51
CD47	2060.33	0.780953	0.050113	15.5838	9.37536e-55	1.17688e-52	1496.07	1595.92	1453.13	2560.25	2685.91	2570.69
SLC46A3	137.149	4.93611	0.317623	15.5408	1.83795e-54	2.28518e-52	10.1291	3.9898	12.2768	245.612	275.752	275.132
VCPIP1	1452.17	0.929314	0.0599391	15.5043	3.24315e-54	3.99428e-52	971.38	1055.3	970.984	2003.21	1921.71	1790.45
RRAS2	2948.94	0.65484	0.0427626	15.3134	6.22565e-53	7.59587e-51	2262.84	2368.94	2238.84	3551.54	3690.59	3580.9
SAMHD1	1052.2	0.978399	0.0640604	15.2731	1.15603e-52	1.39741e-50	715.114	701.207	709.822	1467.77	1321.04	1398.24
MAFF	471.572	1.44208	0.0949073	15.1946	3.84233e-52	4.60198e-50	237.021	271.306	253.349	647.432	681.898	738.424
SMAD1	918.747	1.05255	0.0693787	15.171	5.49972e-52	6.52716e-50	578.371	638.368	575.894	1302.72	1185.31	1231.82
ID2	815.691	-1.07328	0.0708178	-15.1555	6.96732e-52	8.19444e-50	1109.14	1128.12	1078.13	503.012	566.467	509.287
ATAD1	1512.34	0.852878	0.0565963	15.0695	2.57078e-51	2.99657e-49	1037.22	1125.12	1069.2	1944.26	2035.01	1863.2
CGAS	350.271	1.62779	0.108149	15.0514	3.37848e-51	3.90319e-49	172.195	172.559	168.527	565.889	529.059	493.398
ARL6IP5	1194.72	0.929702	0.0618805	15.0241	5.10193e-51	5.8426e-49	795.134	794.967	879.466	1501.18	1593.59	1603.96
LOC101905041	861.159	1.04275	0.0694276	15.0193	5.48892e-51	6.23112e-49	574.32	546.602	568.081	1220.2	1106.21	1151.54
NAMPT	648.311	1.19334	0.0794819	15.0139	5.95084e-51	6.69726e-49	386.931	427.906	367.188	890.096	928.792	888.952
SP140	841.386	1.03216	0.0689994	14.9589	1.362e-50	1.51974e-48	545.958	549.595	562.501	1183.85	1100.87	1105.55
SERPINE1	1637.8	-0.785492	0.05264	-14.922	2.37189e-50	2.62415e-48	2073.43	2052.75	2095.99	1170.09	1169.27	1265.27
TGM2	689.891	1.2788	0.0863613	14.8076	1.30823e-49	1.4352e-47	434.538	398.98	375.001	1023.71	866.802	1040.32
KIF2C	1486.66	0.787782	0.0533093	14.7776	2.04423e-49	2.22395e-47	1103.06	1072.26	1095.98	1841.1	1933.47	1874.08
MAPK1IP1L	2105.71	0.709325	0.0480922	14.7493	3.10978e-49	3.35522e-47	1596.35	1608.89	1587.06	2614.29	2710.49	2517.16
BOLA-DRA	566.039	1.26753	0.0863309	14.6822	8.38468e-49	8.9723e-47	319.066	350.105	328.125	754.519	785.572	858.847
HSPA1A	1011.35	-0.956683	0.0654313	-14.6212	2.05823e-48	2.18457e-46	1387.69	1313.64	1305.81	691.642	643.421	725.88
MCL1	3444.96	0.571868	0.0391299	14.6146	2.26651e-48	2.38623e-46	2794.62	2799.84	2716.52	4142.98	4144.83	4070.95
DAB2IP	2010.75	0.742979	0.0508752	14.604	2.65016e-48	2.76783e-46	1577.1	1432.34	1504.47	2558.29	2428.33	2564
CHSY1	2153.07	0.722631	0.0495062	14.5968	2.94376e-48	3.05006e-46	1659.15	1566	1650.67	2798.01	2576.89	2667.69
PTPDC1	460.291	1.38769	0.0951639	14.5821	3.64979e-48	3.75181e-46	264.369	237.393	262.277	718.168	630.596	648.944
IFIT2	122.383	5.09878	0.350436	14.5498	5.85686e-48	5.97354e-46	7.09037	5.9847	7.81251	237.752	249.032	226.628
TICAM2	277.463	1.83295	0.126436	14.497	1.26521e-47	1.28042e-45	126.614	98.7475	140.625	418.522	432.866	447.403
DDX58	321.076	1.57724	0.109114	14.4549	2.33488e-47	2.34476e-45	152.949	166.574	164.063	478.451	485.238	479.181
NUB1	736.453	1.05799	0.0734503	14.4041	4.87644e-47	4.85969e-45	473.029	480.771	481.027	1002.1	944.825	1036.97
BOLA-DMB	488.01	1.28005	0.0889985	14.3828	6.63252e-47	6.55966e-45	294.757	290.258	268.974	687.712	668.004	718.354
EMX2	1054.97	-0.892668	0.062256	-14.3387	1.25449e-46	1.23138e-44	1399.84	1342.57	1369.42	732.905	775.953	709.155
CXXC5	1550.43	-0.793886	0.0556998	-14.253	4.29717e-46	4.18654e-44	2075.45	1920.09	1901.79	1119.99	1178.89	1106.38
AIFM2	862.451	0.962034	0.0681725	14.1117	3.21505e-45	3.10907e-43	582.423	589.493	583.706	1083.64	1159.65	1175.79
RHOB	3092.05	-0.625253	0.0446291	-14.01	1.35422e-44	1.29996e-42	3814.62	3554.91	3887.28	2386.36	2457.19	2451.94
CASP8	500.742	1.26003	0.0901177	13.982	2.00743e-44	1.91292e-42	297.795	291.255	296.875	727.993	648.765	741.769
FAS	239.608	1.86152	0.133216	13.9737	2.255e-44	2.13326e-42	103.317	90.7679	117.188	366.452	360.188	399.736
TNFRSF1A	2376.82	0.729678	0.0522637	13.9615	2.67902e-44	2.51616e-42	1925.54	1663.75	1776.79	2973.86	2883.64	3037.32
ITGA1	2129.02	0.758199	0.0543289	13.9557	2.90359e-44	2.70759e-42	1554.82	1619.86	1570.31	2892.32	2600.41	2536.4
ATP9A	1055.15	0.874266	0.062664	13.9516	3.07463e-44	2.84676e-42	723.217	746.092	766.742	1403.92	1306.08	1384.86
PNP	2778.66	0.604246	0.0435501	13.8747	9.01337e-44	8.28659e-42	2192.95	2210.35	2210.94	3472.95	3332.54	3252.24
LOC100139670	112.576	3.24772	0.235231	13.8065	2.32837e-43	2.12565e-41	16.2065	26.9311	21.2054	213.191	183.835	214.084
OSMR	881.455	0.906421	0.0657302	13.79	2.92643e-43	2.65309e-41	595.591	617.421	627.233	1156.34	1148.97	1143.18
STARD8	130.341	2.68836	0.194977	13.7881	3.0064e-43	2.7068e-41	39.5035	30.9209	34.5983	229.892	225.518	221.611
BIRC3	681.839	1.20217	0.0873869	13.7569	4.62839e-43	4.1386e-41	377.815	451.845	408.483	1037.46	956.581	858.847
LOC518495	1579.68	0.70665	0.0514159	13.7438	5.54862e-43	4.9277e-41	1198.27	1210.9	1191.97	1997.31	1922.78	1956.87
RGS16	283.525	1.59164	0.116052	13.7149	8.26799e-43	7.29315e-41	137.756	148.62	137.277	416.557	428.591	432.35
ARHGAP28	683.503	1.03785	0.0760973	13.6385	2.36354e-42	2.07088e-40	458.848	441.87	441.965	970.657	902.072	885.607
CLDN1	109.329	3.22739	0.239173	13.4939	1.6983e-41	1.47809e-39	23.2969	23.9388	15.625	223.998	185.972	183.143
EGLN3	854.644	0.903483	0.0671326	13.4582	2.75619e-41	2.38292e-39	595.591	606.449	583.706	1148.48	1099.8	1093.84
SLC6A9	373.182	1.44212	0.107618	13.4003	6.02122e-41	5.17152e-39	232.969	191.51	177.456	557.047	517.302	562.808
NHS	347.354	1.43136	0.107296	13.3404	1.34823e-40	1.1504e-38	174.22	212.457	176.34	517.749	506.614	496.743
B4GALT5	1979.74	0.636749	0.0478829	13.298	2.37611e-40	2.01429e-38	1551.78	1551.03	1545.76	2484.61	2391.99	2353.26
LOC515697	91.8651	4.21918	0.318612	13.2424	4.99447e-40	4.20663e-38	9.11618	7.9796	11.1607	167.016	175.284	180.634
IER3	2239.26	-0.679226	0.0513987	-13.2148	7.20407e-40	6.02879e-38	2814.88	2574.42	2882.82	1666.23	1748.57	1748.64
SLC34A2	730.835	0.999324	0.0756976	13.2015	8.59631e-40	7.14808e-38	493.287	464.811	505.581	1012.9	907.416	1001.01
CDADC1	394.253	1.3104	0.0994434	13.1773	1.18506e-39	9.79174e-38	240.06	232.406	206.474	588.485	546.16	551.937
RASL11B	249.583	-1.70281	0.129652	-13.1337	2.11037e-39	1.73276e-37	429.474	348.11	368.304	117.894	113.293	120.423
AJUBA	1016.76	-0.809939	0.0617441	-13.1177	2.60812e-39	2.12807e-37	1326.91	1261.77	1295.76	751.571	735.339	729.225
NT5E	1371.25	0.717627	0.0548135	13.0922	3.65041e-39	2.96001e-37	1030.13	1055.3	1025.67	1658.37	1726.12	1731.91
SP110	265.019	1.55169	0.119245	13.0126	1.03792e-38	8.36421e-37	136.743	134.656	132.813	387.084	408.284	390.537
ID1	663.855	1.1036	0.0848408	13.0079	1.10381e-38	8.84065e-37	467.964	382.023	415.179	972.622	849.701	895.642
SMTNL2	850.653	-0.896331	0.068959	-12.998	1.25537e-38	9.99324e-37	1152.69	1065.28	1103.8	574.731	583.568	623.856
TNFSF10	92.9869	4.76443	0.366824	12.9883	1.42508e-38	1.12754e-36	4.05164	6.98215	8.92858	189.612	182.766	165.581
SDC4	4385.1	0.546869	0.042273	12.9366	2.79722e-38	2.19986e-36	3659.64	3506.03	3524.56	4937.77	5431.67	5250.92
TNFSF13B	353.927	1.37231	0.106418	12.8955	4.7738e-38	3.73185e-36	178.272	195.5	218.75	537.398	492.72	500.924
CARHSP1	1101.85	0.799444	0.0621013	12.8732	6.36784e-38	4.94834e-36	828.56	791.975	792.412	1332.2	1410.82	1455.11
USP18	222.017	1.73392	0.134751	12.8676	6.853e-38	5.29384e-36	89.136	110.717	108.259	355.646	331.33	337.016
TAPBPL	702.055	1.0288	0.0800057	12.8591	7.65017e-38	5.87488e-36	461.887	429.901	495.536	875.36	946.962	1002.68
RIPK1	966.817	0.811713	0.0636967	12.7434	3.3919e-37	2.58955e-35	690.804	711.181	704.242	1201.53	1219.51	1273.64
SPNS2	1188.14	-0.7738	0.0607512	-12.7372	3.67337e-37	2.78813e-35	1517.34	1443.31	1537.95	929.394	841.15	859.683
RAB8B	251.155	1.69309	0.133423	12.6896	6.7542e-37	5.09689e-35	118.51	104.732	132.813	407.715	406.146	337.016
ADA	563.225	1.04808	0.0830861	12.6144	1.76e-36	1.3205e-34	361.609	350.105	390.626	725.045	783.435	768.53
TMEM106A	207.215	1.75343	0.139521	12.5674	3.18852e-36	2.37864e-34	94.2006	86.7781	103.795	299.646	337.743	321.127
GABARAPL1	1239.71	0.710438	0.0566849	12.5331	4.91998e-36	3.64945e-34	956.186	919.648	946.43	1520.83	1530.53	1564.66
CLDN4	923.549	-0.824538	0.06591	-12.5101	6.57751e-36	4.85138e-34	1212.45	1148.06	1183.04	648.415	647.696	701.628
BTBD11	1673.41	0.642256	0.0514693	12.4784	9.78774e-36	7.17859e-34	1323.87	1257.78	1340.4	2083.77	2000.8	2033.8
UMPS	1058.12	0.751407	0.0606522	12.3888	3.00547e-35	2.19198e-33	796.147	769.034	801.34	1350.86	1305.01	1326.32
KLF6	5280.76	0.463951	0.0374724	12.3811	3.30647e-35	2.39811e-33	4470.98	4583.28	4258.93	6185.48	6141.36	6044.54
IL7	173.364	1.93754	0.156799	12.3569	4.47124e-35	3.22497e-33	56.7229	80.7934	78.1251	270.173	272.546	281.822
IL11	1104.89	-0.811896	0.0657527	-12.3477	5.01112e-35	3.59451e-33	1435.29	1298.68	1488.84	793.817	835.806	776.892
SOSTDC1	258.954	1.4839	0.121298	12.2335	2.05919e-34	1.469e-32	137.756	135.653	136.161	391.014	355.912	397.227
PLEKHG1	293.968	1.47683	0.12156	12.149	5.80905e-34	4.12159e-32	123.575	176.549	166.295	437.189	432.866	427.333
DYRK2	1540.98	0.688764	0.0567557	12.1356	6.84145e-34	4.82785e-32	1139.52	1209.91	1188.62	1980.61	1940.95	1786.27
TRIM38	708.694	0.916762	0.076042	12.056	1.8033e-33	1.2657e-31	496.326	462.817	514.51	973.604	877.49	927.421
PSMB10	620.906	1.00546	0.0836895	12.0141	2.99437e-33	2.07933e-31	446.693	379.031	414.063	789.887	810.155	885.607
ENC1	1283.31	-0.695153	0.0578595	-12.0145	2.98168e-33	2.07933e-31	1532.53	1589.93	1636.16	1008.97	993.99	938.292
GOLPH3	2645.36	0.541106	0.0451741	11.9782	4.62045e-33	3.19154e-31	2161.55	2132.55	2170.76	3283.34	3063.2	3060.74
ZFP36	268.156	1.56556	0.131757	11.8821	1.4661e-32	1.00736e-30	129.652	112.712	165.179	362.523	423.247	415.625
SOD2	788.21	0.842089	0.0709484	11.869	1.71437e-32	1.17178e-30	570.268	597.472	524.554	1008.97	1011.09	1016.9
SYT7	73.7298	3.94361	0.333337	11.8307	2.70909e-32	1.84204e-30	8.10327	9.97449	8.92858	126.736	138.945	149.692
OGFRL1	2308.15	0.531892	0.0450822	11.7983	3.98424e-32	2.69504e-30	1908.32	1921.09	1832.59	2723.34	2695.53	2768.05
RHOBTB3	926.92	0.768226	0.0651335	11.7946	4.16003e-32	2.79944e-30	722.204	678.266	656.251	1170.09	1163.93	1170.77
KIRREL1	3636.97	0.479793	0.0407087	11.786	4.60897e-32	3.08564e-30	2912.11	3138.97	3062.5	4278.55	4194	4235.69
PCDH18	698.983	-0.939107	0.0801531	-11.7164	1.05027e-31	6.99558e-30	889.334	957.551	907.367	529.539	477.756	432.35
ANXA10	430.208	1.09125	0.0934952	11.6717	1.77821e-31	1.1784e-29	263.356	280.283	281.25	552.135	599.6	604.621
BMP2	635.002	-0.987727	0.084754	-11.654	2.18827e-31	1.44282e-29	890.347	864.789	774.555	427.364	464.931	388.028
TIFA	83.436	2.95259	0.255343	11.5632	6.32885e-31	4.15192e-29	14.1807	20.9464	22.3215	141.472	152.839	148.856
OAS2	69.9088	3.91977	0.339509	11.5454	7.78621e-31	5.08245e-29	11.142	6.98215	7.81251	130.665	135.738	127.113
FBXO7	1055.91	0.69376	0.0602661	11.5116	1.15311e-30	7.48949e-29	810.327	790.977	819.198	1293.88	1323.18	1297.89
PARP3	355.457	1.31602	0.11542	11.4021	4.08365e-30	2.63921e-28	192.453	197.495	222.099	430.311	537.609	552.773
BACH1	2359.95	0.588756	0.0517522	11.3764	5.47913e-30	3.52365e-28	1838.43	2001.88	1813.62	2987.62	2715.84	2802.33
PMAIP1	89.3393	2.81333	0.247331	11.3748	5.58439e-30	3.57374e-28	13.1678	26.9311	26.7858	156.209	169.94	143.002
PPP1R15B	2426.69	0.626031	0.0550728	11.3673	6.08227e-30	3.87337e-28	1840.46	2056.74	1823.66	3003.34	3077.09	2758.85
LOC788334	82.663	3.03689	0.269183	11.2819	1.6127e-29	1.02203e-27	11.142	28.926	13.3929	155.227	144.289	143.002
ACSL5	3714.95	0.470162	0.041735	11.2654	1.94475e-29	1.22651e-27	3122.8	3117.03	3108.26	4333.57	4118.11	4489.92
ARID5A	259.133	1.38531	0.123042	11.2588	2.09485e-29	1.31482e-27	141.807	132.661	156.25	348.768	404.009	371.303
SYBU	333.473	-1.22105	0.108767	-11.2263	3.02956e-29	1.89239e-27	460.874	474.786	463.17	178.805	230.862	192.342
RTKN2	412.129	1.13443	0.101089	11.2221	3.17554e-29	1.97413e-27	252.214	268.314	252.233	615.011	578.224	506.778
DUSP16	1369.57	0.607931	0.0544423	11.1665	5.94599e-29	3.67891e-27	1099.01	1082.23	1073.66	1695.7	1642.75	1624.03
IFIT3	75.3235	5.27322	0.473735	11.1312	8.84702e-29	5.44801e-27	2.02582	6.98215	2.23215	162.104	119.706	158.891
LFNG	1268.98	-0.663717	0.059886	-11.083	1.51684e-28	9.29685e-27	1624.71	1473.23	1571.43	948.061	973.682	1022.76
MTHFD2	1005.64	0.692469	0.0625235	11.0753	1.65254e-28	1.00813e-26	792.095	745.095	770.09	1260.48	1206.68	1259.42
PDGFRA	189.652	-1.52633	0.138609	-11.0118	3.3536e-28	2.03633e-26	277.537	278.288	289.063	91.3675	100.468	101.188
KIAA1671	4223.54	0.427974	0.0389199	10.9963	3.98168e-28	2.40652e-26	3556.32	3593.81	3658.49	4764.86	4747.64	5020.11
TXNL4B	550.865	0.935207	0.0850935	10.9903	4.25293e-28	2.55862e-26	406.177	364.069	363.84	688.695	767.403	715.009
CLTC	8596.54	0.436055	0.0398305	10.9478	6.80966e-28	4.07799e-26	7209.89	7549.7	7161.84	10428.7	9417.25	9811.93
TMEM41A	379.811	1.08464	0.0998274	10.8652	1.68935e-27	1.00706e-25	250.189	256.345	223.215	538.381	490.582	520.158
UBE2L6	108.493	2.20433	0.203142	10.8512	1.96844e-27	1.16809e-25	45.5809	35.9082	34.5983	180.77	159.252	194.85
CCDC71L	454.27	1.08405	0.10002	10.8383	2.26587e-27	1.3385e-25	321.092	259.337	292.411	654.309	642.352	556.118
BHLHE40	2402.26	-0.563554	0.0521229	-10.812	3.01929e-27	1.77553e-25	2784.49	2718.05	3097.1	1973.73	1887.51	1952.68
KCNK5	1583.91	-0.594103	0.055014	-10.7991	3.4752e-27	2.02539e-25	1978.21	1837.3	1904.02	1244.76	1212.03	1327.16
CD274	166.882	7.90623	0.732096	10.7994	3.463e-27	2.02539e-25	3.03873	0	1.11607	294.734	349.5	352.905
TNFRSF10D	1666.66	0.566195	0.0526409	10.7558	5.56411e-27	3.22842e-25	1310.7	1323.62	1397.32	1924.61	2061.73	1981.95
CDK17	677.76	0.881783	0.0822636	10.719	8.28962e-27	4.78854e-25	474.042	509.697	446.429	954.938	805.88	875.572
CMTR2	277.65	1.29037	0.120685	10.692	1.10916e-26	6.37887e-25	170.169	148.62	164.063	396.908	430.729	355.414
PPARD	1492.95	0.5931	0.0555968	10.6679	1.43874e-26	8.23806e-25	1187.13	1121.13	1264.51	1784.12	1802.01	1798.81
LOC100297676	66.0395	5.21137	0.491712	10.5984	3.0306e-26	1.72771e-24	3.03873	1.9949	5.58037	124.771	130.394	130.458
SIK1	954.17	-0.764782	0.0722069	-10.5915	3.26155e-26	1.85128e-24	1253.98	1092.21	1257.81	661.186	748.164	711.664
PDGFB	376.132	-1.09418	0.10369	-10.5524	4.95199e-26	2.79863e-24	570.268	467.804	498.885	246.594	234.069	239.172
LOC100848815	337.284	1.1234	0.10655	10.5433	5.45304e-26	3.06851e-24	228.918	220.436	186.384	447.013	473.481	467.473
VASN	1177.06	-0.702882	0.0668815	-10.5094	7.82145e-26	4.38236e-24	1594.32	1342.57	1438.62	867.5	897.797	921.567
PSMB9	579.919	0.840863	0.0801598	10.4898	9.61927e-26	5.36665e-24	420.357	413.942	412.947	713.256	739.614	779.401
PARP8	66.1286	3.18483	0.303717	10.4862	9.99764e-26	5.55401e-24	16.2065	12.9668	10.0447	111.016	106.881	139.657
LOC112443175	178.468	1.54869	0.147723	10.4837	1.0262e-25	5.67672e-24	81.0327	89.7705	102.679	251.506	263.995	281.822
IFFO2	1065.62	-0.642633	0.0618185	-10.3955	2.59979e-25	1.43208e-23	1256.01	1355.53	1284.6	813.465	860.389	823.723
IL4R	661.79	0.769978	0.0740934	10.392	2.6965e-25	1.47911e-23	478.093	491.743	497.769	831.15	850.77	821.215
PRORSD1	298.824	1.18635	0.114233	10.3854	2.8901e-25	1.57867e-23	200.556	185.526	160.715	391.014	421.11	434.023
PCGF5	922.097	0.76549	0.0739666	10.3491	4.2233e-25	2.2973e-23	657.378	751.079	639.51	1249.67	1105.15	1129.8
F3	637.441	-0.789866	0.0764822	-10.3274	5.29535e-25	2.8685e-23	807.289	801.949	813.617	498.1	452.105	451.584
HNF1B	1581.45	-0.530932	0.0516171	-10.286	8.15145e-25	4.3974e-23	1918.45	1866.23	1821.43	1308.62	1302.87	1271.13
WNT7B	5742.1	-0.371213	0.036152	-10.2681	9.81192e-25	5.27139e-23	6646.71	6238.05	6546.88	5013.42	4984.91	5022.62
SNX18	1505.87	0.562225	0.0547637	10.2664	9.98707e-25	5.34349e-23	1183.08	1262.77	1200.89	1860.75	1796.66	1731.07
INHBA	58.019	3.50779	0.342022	10.2561	1.11155e-24	5.92298e-23	10.1291	6.98215	11.1607	119.858	100.468	99.5158
XAF1	62.8174	3.14517	0.30774	10.2202	1.60979e-24	8.54302e-23	18.2324	11.9694	7.81251	106.104	109.018	123.768
PLEKHA4	371.123	1.04479	0.102241	10.219	1.63092e-24	8.62012e-23	253.227	221.434	253.349	473.539	491.651	533.539
HERC5	166.965	1.69298	0.165771	10.2127	1.73877e-24	9.1531e-23	73.9424	103.735	58.0358	247.576	257.582	260.915
RAB20	715.777	0.744364	0.0731056	10.182	2.3851e-24	1.2505e-22	555.074	529.646	520.09	937.254	875.352	877.245
VPS54	546.862	0.823176	0.0809457	10.1695	2.71353e-24	1.417e-22	386.931	402.97	395.09	713.256	682.967	699.956
ERAP2	709.465	0.775632	0.0763935	10.1531	3.20975e-24	1.66945e-22	502.403	562.562	504.465	941.184	849.701	896.479
HES1	1185.2	-0.620049	0.0611927	-10.1327	3.95463e-24	2.04872e-22	1534.56	1395.43	1377.23	920.552	950.169	933.274
JAG1	2461.7	-0.516056	0.0509711	-10.1245	4.30265e-24	2.2202e-22	2785.5	2970.4	2934.16	2167.28	1998.67	1914.22
DAXX	1540.56	0.555582	0.0549488	10.1109	4.94248e-24	2.54032e-22	1317.8	1195.94	1229.91	1839.14	1780.63	1879.93
HS6ST1	649.118	0.808654	0.0802866	10.0721	7.34062e-24	3.74343e-22	521.648	456.832	436.385	850.798	799.467	829.577
HGF	493.579	0.951914	0.0945087	10.0722	7.32888e-24	3.74343e-22	340.338	343.123	324.777	729.958	629.527	593.75
LRP8	636.017	0.770697	0.0768657	10.0265	1.16539e-23	5.9199e-22	456.822	491.743	462.054	807.571	771.678	826.232
DLC1	1369.29	-0.578905	0.0580981	-9.96427	2.18471e-23	1.10548e-21	1560.89	1724.59	1633.93	1131.78	1108.35	1056.21
PLEKHA1	1135.96	0.596102	0.059855	9.9591	2.30139e-23	1.16003e-21	913.644	891.72	907.367	1416.69	1373.42	1312.94
CXCL5	250.534	-1.19315	0.119935	-9.94834	2.56426e-23	1.28756e-21	365.66	351.102	328.125	155.227	159.252	143.838
MAPRE3	226.628	1.27036	0.12786	9.93556	2.91533e-23	1.45822e-21	125.601	148.62	123.884	311.435	324.917	325.308
LOC107131864	69.5682	2.65735	0.267667	9.92784	3.15016e-23	1.56967e-21	13.1678	24.9362	18.9732	122.806	115.431	122.095
NEDD9	1987.61	0.49036	0.0494688	9.91252	3.67267e-23	1.82307e-21	1703.71	1649.78	1604.91	2414.85	2255.18	2297.23
PAX8	4046.21	-0.384312	0.038839	-9.895	4.37611e-23	2.16402e-21	4671.54	4511.46	4565.85	3546.63	3396.67	3585.08
TMEM51	240.147	1.24098	0.125552	9.88416	4.87651e-23	2.40237e-21	154.975	149.617	122.768	338.944	348.431	326.144
PVR	3628.02	0.401995	0.0409889	9.80742	1.04608e-22	5.13404e-21	3101.53	3052.2	3227.68	4142.98	4008.02	4235.69
PSME2	1186.91	0.572324	0.0583927	9.80131	1.1114e-22	5.4342e-21	993.664	951.567	917.412	1441.25	1407.62	1409.95
VEGFA	532.197	-0.799515	0.0817733	-9.77721	1.41045e-22	6.87066e-21	652.314	680.261	695.314	390.031	392.252	383.01
B2M	4681.64	0.442294	0.0452918	9.76543	1.58433e-22	7.68903e-21	4035.43	4124.45	3744.43	5178.47	5689.25	5317.82
BIRC2	1042.9	0.600434	0.0616112	9.74553	1.92776e-22	9.32107e-21	826.534	860.799	797.992	1246.72	1286.84	1238.51
SPP1	3318.77	0.423794	0.0436033	9.71931	2.49475e-22	1.20181e-20	2685.22	2950.46	2869.42	3729.37	3826.33	3851.85
MVP	533.459	0.811711	0.0836928	9.69869	3.0538e-22	1.46571e-20	416.306	374.044	370.536	678.87	693.655	667.341
ZFP36L1	746.054	0.701161	0.0723796	9.68728	3.41516e-22	1.63315e-20	576.345	534.633	593.751	924.482	952.306	894.806
TNS2	1105.2	0.613102	0.0636533	9.6319	5.86358e-22	2.79376e-20	905.541	820.901	897.323	1316.48	1286.84	1404.09
EPHB2	1129.58	0.619688	0.0644615	9.61332	7.02472e-22	3.33483e-20	915.67	892.717	864.957	1409.81	1260.12	1434.2
SEMA7A	479.295	0.915446	0.0953392	9.60199	7.8415e-22	3.70909e-20	333.247	287.265	377.233	603.222	643.421	631.382
SPRED1	455.824	0.848066	0.088401	9.5934	8.52327e-22	4.01701e-20	334.26	329.158	312.5	588.485	598.531	572.007
CASP7	133.877	1.7092	0.178322	9.58491	9.25414e-22	4.34579e-20	59.7617	78.7985	49.1072	196.489	196.66	222.447
LOC100298356	71.1678	2.46905	0.257623	9.58394	9.34162e-22	4.37114e-20	22.284	26.9311	15.625	118.876	130.394	112.896
LOC509283	1338.48	1.14436	0.119576	9.57008	1.06823e-21	4.98064e-20	758.669	901.694	841.519	2040.54	1608.55	1879.93
LOC100848863	55.5141	3.11883	0.325929	9.56905	1.07892e-21	5.01258e-20	8.10327	9.97449	16.7411	97.2622	89.7797	111.224
LOC783920	90.6337	7.01815	0.739047	9.49621	2.1767e-21	1.00769e-19	2.02582	0	2.23215	197.472	173.147	168.926
CEBPB	215.193	1.21979	0.129407	9.42599	4.26065e-21	1.96327e-19	124.588	129.668	133.929	283.927	304.61	314.437
VIPR2	170.798	1.45066	0.153904	9.42574	4.27092e-21	1.96327e-19	86.0973	87.7756	101.563	256.418	216.968	275.968
DEGS1	3360.57	0.40872	0.0434187	9.41346	4.80083e-21	2.19912e-19	2935.41	2954.45	2770.09	3710.7	3980.23	3812.54
ZGPAT	768.333	0.718489	0.076708	9.36655	7.49443e-21	3.42097e-19	632.055	545.605	565.849	990.306	886.04	990.141
PML	1665.81	0.497102	0.0531012	9.36141	7.86798e-21	3.57897e-19	1421.11	1329.6	1395.09	1863.7	1985.84	1999.52
RNASEL	391.722	1.0334	0.110549	9.34793	8.93803e-21	4.0516e-19	215.75	305.22	250	563.924	504.476	510.959
PGS1	552.251	0.779973	0.0834498	9.34662	9.0495e-21	4.08793e-19	431.499	391	397.322	661.186	703.274	729.225
LOC618733	841.81	0.635277	0.0681208	9.32574	1.10212e-20	4.94693e-19	667.507	643.355	666.296	1039.43	1059.19	975.088
EPHB4	1237.73	-0.550838	0.0590668	-9.32569	1.10269e-20	4.94693e-19	1486.95	1402.41	1526.79	1001.11	970.476	1038.64
SDHAF2	784.619	0.681012	0.0731173	9.31397	1.23145e-20	5.50566e-19	628.004	580.516	601.563	958.868	908.485	1030.28
ZMIZ1	1532.96	-0.505599	0.0543134	-9.30892	1.29143e-20	5.75413e-19	1808.04	1733.57	1853.8	1307.64	1280.43	1214.26
MGC126945	251.803	1.13074	0.121857	9.27927	1.70637e-20	7.57709e-19	168.143	150.615	155.134	317.33	351.637	367.958
LOC781710	45.559	4.51642	0.487148	9.27114	1.84173e-20	8.15045e-19	4.05164	2.99235	4.46429	84.4904	88.7109	88.6443
SYNPO	1469.16	-0.487045	0.0526016	-9.25913	2.06111e-20	9.09047e-19	1716.88	1682.7	1744.42	1241.81	1229.13	1200.04
ZBTB38	2113.39	0.512683	0.0553949	9.25506	2.14112e-20	9.41155e-19	1648	1821.34	1755.58	2673.24	2388.78	2393.4
EMP1	697.186	0.679137	0.0734912	9.24106	2.44059e-20	1.06919e-18	516.584	561.564	529.019	865.535	877.49	832.922
TRIM14	368.016	0.976361	0.105674	9.23935	2.47992e-20	1.08279e-18	262.344	220.436	262.277	445.048	496.995	520.995
CYBRD1	2432.27	0.468183	0.0506868	9.2368	2.5399e-20	1.10528e-18	1975.17	2112.6	2032.37	2948.32	2882.57	2642.61
SAT1	587.414	0.734235	0.0796394	9.2195	2.98492e-20	1.29462e-18	445.68	437.88	438.617	726.028	773.816	702.465
FAM102A	484.043	-0.90524	0.0981979	-9.21853	3.01203e-20	1.30206e-18	702.959	606.449	581.474	331.084	376.22	306.074
PTPRJ	3484.19	0.458056	0.0497437	9.20833	3.31238e-20	1.42717e-18	2863.49	3037.23	2907.37	4319.82	3739.75	4037.5
C1RL	236.955	1.19716	0.130274	9.18957	3.94408e-20	1.69375e-18	163.078	122.686	146.206	357.61	311.023	321.127
CLCF1	334.971	-1.01356	0.110299	-9.18919	3.95798e-20	1.69414e-18	453.783	424.913	467.635	202.384	205.211	255.898
DENND2D	155.579	1.42514	0.155575	9.16047	5.16704e-20	2.20443e-18	97.2393	80.7934	74.7769	232.84	228.725	219.102
ARFRP1	1151.57	0.551005	0.0601666	9.15799	5.28725e-20	2.24837e-18	987.587	894.712	920.76	1344.97	1372.35	1389.04
BCL2L14	678.012	0.683488	0.0746758	9.15273	5.55104e-20	2.35288e-18	492.274	550.592	517.858	849.816	830.462	827.068
OAS1X	44.7762	4.4933	0.490954	9.15217	5.58019e-20	2.35759e-18	3.03873	3.9898	4.46429	93.3324	72.6788	91.1532
C3	118.918	1.69402	0.185212	9.14636	5.88868e-20	2.47989e-18	43.5551	62.8393	62.5001	184.7	166.734	193.178
TXNIP	158.394	1.38537	0.151587	9.13914	6.29523e-20	2.64258e-18	94.2006	81.7909	87.0537	220.068	237.275	229.974
ITPRIPL1	1085.25	0.544071	0.0598108	9.09653	9.32637e-20	3.90243e-18	861.986	892.717	893.975	1315.5	1287.91	1259.42
SHCBP1	1127.13	0.556677	0.061299	9.08135	1.07239e-19	4.47285e-18	925.799	942.59	866.073	1343	1391.59	1293.71
OAT	3847.52	0.337231	0.0371752	9.07139	1.17511e-19	4.8857e-18	3409.45	3411.28	3379.47	4272.66	4272.02	4340.23
NHSL1	615.989	0.712509	0.0788289	9.03868	1.58578e-19	6.57219e-18	462.9	454.837	483.26	812.483	740.683	741.769
OTUD4	1158.55	0.5547	0.0614805	9.02237	1.84068e-19	7.60445e-18	930.864	948.574	935.269	1468.76	1349.9	1317.96
ZNF697	795.359	-0.650434	0.0725719	-8.9626	3.17102e-19	1.30592e-17	908.58	977.5	1027.9	620.906	647.696	589.569
GPR156	210.124	1.15847	0.129525	8.94401	3.75309e-19	1.54077e-17	126.614	132.661	130.581	300.629	291.784	278.477
FLNC	6975.69	-0.33311	0.0375313	-8.87552	6.96071e-19	2.84866e-17	7783.2	7458.93	8093.76	6294.53	6027	6196.74
TCAF2	137.15	1.45975	0.164579	8.86961	7.3402e-19	2.99457e-17	82.0457	66.8291	70.3126	197.472	210.555	195.687
IPPK	477.669	0.785237	0.0885475	8.86797	7.44904e-19	3.02951e-17	350.467	325.169	377.233	594.38	624.183	594.586
DRAM2	833.12	0.641846	0.0724535	8.85873	8.09345e-19	3.28136e-17	684.727	640.363	625.001	1007.01	1089.11	952.509
SOCS1	50.8414	2.89608	0.327036	8.85554	8.32809e-19	3.36604e-17	13.1678	15.9592	6.69644	90.3851	80.1605	98.6796
KRT80	1153.97	-0.517053	0.0584456	-8.84673	9.01223e-19	3.63132e-17	1390.72	1337.58	1348.22	971.639	918.104	957.526
TBX21	46.5517	5.21793	0.590859	8.83111	1.03646e-18	4.16337e-17	1.01291	1.9949	4.46429	105.122	89.7797	76.9366
TRAF4	902.256	-0.607278	0.0687905	-8.82793	1.06632e-18	4.27018e-17	1174.97	1057.3	1034.6	709.326	733.201	704.137
SP3	724.937	0.630393	0.0714339	8.82484	1.09613e-18	4.37613e-17	576.345	562.562	568.081	915.64	861.458	865.537
BLA-DQB	186.118	1.33605	0.151892	8.79604	1.41734e-18	5.64128e-17	111.42	84.7832	121.652	237.752	265.064	296.039
GLIS2	610.147	-0.706779	0.0810175	-8.72378	2.69056e-18	1.06764e-16	808.302	732.128	727.68	476.486	483.1	433.187
RBM43	109.247	1.67194	0.192093	8.70381	3.20929e-18	1.26961e-16	42.5422	65.8317	47.9911	163.086	164.596	171.435
LMO4	727.019	-0.611761	0.0703926	-8.6907	3.60216e-18	1.42073e-16	885.283	882.743	868.305	559.012	588.912	577.861
NAPB	196.131	1.18504	0.13683	8.66067	4.68997e-18	1.8442e-16	110.407	118.696	130.581	255.436	290.715	270.951
E2F8	1717.66	0.462655	0.0535465	8.64025	5.60914e-18	2.19902e-16	1444.41	1519.12	1367.19	2030.72	2021.11	1923.42
OSBPL3	781.079	0.620599	0.0718699	8.63503	5.87091e-18	2.29475e-16	614.836	639.365	592.635	997.183	892.453	950
ARAP2	125.719	1.52883	0.177288	8.62339	6.5002e-18	2.53314e-16	55.71	77.8011	60.2679	202.384	181.697	176.452
WDR25	112.969	1.63752	0.189901	8.623	6.5222e-18	2.53415e-16	59.7617	51.8674	53.5715	153.262	160.321	199.032
GBP5	113.387	10.2118	1.18691	8.60372	7.71747e-18	2.98966e-16	0	0	0	210.243	223.38	246.699
BATF2	158.998	8.8416	1.02804	8.60046	7.93996e-18	3.06675e-16	1.01291	0.997449	0	316.348	288.578	347.051
FCGR1A	329.523	0.922135	0.107372	8.58821	8.83371e-18	3.40189e-16	216.763	218.441	248.884	400.838	433.935	458.275
LGALS8	721.141	0.627341	0.0730527	8.58751	8.88725e-18	3.41244e-16	553.049	548.597	599.331	909.745	861.458	854.665
SLC22A23	1010.24	-0.539559	0.0631318	-8.54654	1.26836e-17	4.85583e-16	1234.74	1164.02	1193.08	783.992	832.6	852.993
SLC4A7	811.728	0.599875	0.0703786	8.52354	1.54753e-17	5.9073e-16	653.327	673.278	609.376	1006.02	929.861	998.503
TRIM34	462.453	0.785856	0.0922612	8.51772	1.62718e-17	6.19325e-16	325.144	322.176	371.652	557.047	624.183	574.516
ETS2	1050.8	0.510088	0.0599144	8.51362	1.68585e-17	6.3979e-16	873.128	850.824	877.233	1246.72	1225.92	1230.99
DESI1	1869.96	0.412899	0.0485372	8.50687	1.78696e-17	6.76196e-16	1581.15	1577.97	1655.14	2102.43	2135.47	2167.61
PQLC1	1200.94	0.51889	0.0611125	8.49074	2.05317e-17	7.74686e-16	1057.48	958.549	945.314	1366.58	1434.34	1443.4
STX1A	242.044	1.02711	0.121117	8.48032	2.24573e-17	8.449e-16	155.988	150.615	171.875	311.435	334.536	327.817
HIVEP2	974.297	0.632271	0.0745993	8.47556	2.33942e-17	8.7762e-16	707.011	846.835	738.84	1256.55	1092.32	1204.23
SCHIP1	1092.49	0.507257	0.0600002	8.45425	2.80888e-17	1.05071e-15	904.528	936.605	864.957	1279.15	1286.84	1282.83
RFX5	945.391	0.556637	0.0658518	8.45289	2.84189e-17	1.06002e-15	760.695	782	754.465	1107.22	1076.29	1191.68
SMG6	1045.5	0.531288	0.0630244	8.42987	3.46038e-17	1.28704e-15	842.741	882.743	838.171	1286.02	1248.37	1174.96
SLC38A1	4905.48	0.370016	0.0440813	8.39395	4.70067e-17	1.74339e-15	4091.14	4548.37	4197.55	5749.28	5489.39	5357.13
FBXL14	2465.91	0.400928	0.0478091	8.38602	5.02858e-17	1.85972e-15	2205.1	2147.51	2021.21	2711.55	2906.08	2804
FJX1	419.975	0.787646	0.0939419	8.38439	5.09886e-17	1.88038e-15	329.196	308.212	286.831	542.31	505.545	547.755
CASP4	513.555	0.710431	0.0848212	8.37563	5.49314e-17	2.02008e-15	388.957	393.993	385.045	609.117	678.692	625.528
ARL6IP1	3437.61	0.375549	0.0450506	8.33616	7.67406e-17	2.81418e-15	3111.66	3037.23	2824.78	3956.31	3956.72	3738.95
HS3ST1	37.4828	3.6482	0.439801	8.29511	1.08488e-16	3.96725e-15	9.11618	2.99235	4.46429	78.5957	61.9908	67.7377
SGMS1	1149.37	0.50411	0.0608476	8.2848	1.18305e-16	4.31416e-15	973.406	909.674	967.635	1335.14	1410.82	1299.56
PRICKLE3	329.218	0.868667	0.104887	8.28192	1.21205e-16	4.4076e-15	230.943	221.434	246.652	407.715	452.105	416.461
KLHDC7A	466.756	0.727872	0.0879689	8.2742	1.29324e-16	4.68981e-15	335.273	371.051	348.215	593.398	562.192	590.405
PSMB8	1991.53	0.405897	0.0493028	8.23272	1.83004e-16	6.61805e-15	1741.19	1657.76	1743.31	2216.4	2230.6	2359.95
PCDH1	429.794	-0.745713	0.0907212	-8.21982	2.03801e-16	7.34978e-15	554.061	535.63	524.554	314.383	339.88	310.255
TTYH2	1130.02	-0.473958	0.057724	-8.21077	2.19775e-16	7.90216e-15	1310.7	1315.64	1315.85	956.903	935.205	945.818
LOC616942	391.1	0.796071	0.096958	8.21047	2.20328e-16	7.90216e-15	288.679	306.217	262.277	505.96	476.688	506.778
SENP2	622.25	0.662068	0.0807887	8.19505	2.50492e-16	8.95938e-15	459.861	505.707	479.911	704.414	805.88	777.729
EXO1	590.528	0.670601	0.0819377	8.18428	2.73936e-16	9.77112e-15	425.422	465.809	476.563	771.22	688.311	715.845
HNF4G	197.047	1.12942	0.13801	8.18361	2.75472e-16	9.77254e-15	113.446	128.671	128.348	283.927	285.371	242.518
PCDH7	2868.65	-0.364664	0.04456	-8.18365	2.75362e-16	9.77254e-15	3199.78	3288.59	3198.67	2639.83	2434.74	2450.26
LRP10	1503.13	0.485894	0.0594359	8.17509	2.95657e-16	1.04602e-14	1309.69	1214.89	1234.38	1826.37	1617.1	1816.37
GCLM	410.363	0.771568	0.0945574	8.15979	3.35603e-16	1.18413e-14	284.628	316.191	308.036	519.714	541.885	491.725
BCL9	1178.84	-0.483169	0.0593276	-8.14409	3.82149e-16	1.34473e-14	1328.94	1351.54	1443.08	1006.02	980.095	963.38
MBOAT1	555.651	0.701599	0.0863821	8.12204	4.58414e-16	1.60876e-14	473.029	395.987	400.67	680.835	665.866	717.517
MGAT3	132.504	1.36787	0.168423	8.12161	4.60049e-16	1.61017e-14	83.0586	69.8215	69.1965	204.349	172.078	196.523
RAB11FIP4	193.022	-1.0824	0.133375	-8.11542	4.84089e-16	1.68978e-14	269.434	253.352	263.393	122.806	130.394	118.75
ATP13A3	1741.33	0.470763	0.0580749	8.10614	5.22536e-16	1.81912e-14	1473.78	1521.11	1380.58	2132.89	2063.86	1875.75
PTPN13	2976.55	0.431496	0.0533934	8.08144	6.40048e-16	2.22229e-14	2406.67	2636.26	2561.39	3712.66	3225.66	3316.64
TOP1	2194.13	0.383813	0.0477094	8.04482	8.63757e-16	2.99107e-14	1843.5	1984.92	1881.7	2445.31	2556.58	2452.77
PLCXD2	375.863	0.817438	0.101641	8.04244	8.80639e-16	3.04147e-14	288.679	257.342	270.09	438.171	518.371	482.526
PAG1	289.933	0.911524	0.113398	8.03828	9.11073e-16	3.13827e-14	174.22	214.452	215.402	378.242	382.633	374.648
TMCC3	456.336	0.706568	0.0880784	8.02203	1.04011e-15	3.57333e-14	344.389	344.12	352.679	564.907	544.022	587.896
SNX16	567.713	0.650933	0.0814246	7.99429	1.30318e-15	4.46536e-14	438.59	458.827	426.34	691.642	731.063	659.815
LOC510382	59.7846	6.83176	0.855051	7.98988	1.35065e-15	4.6159e-14	1.01291	0.997449	1.11607	120.841	121.844	112.896
ERAP1	145.047	1.31527	0.164661	7.98775	1.37421e-15	4.68417e-14	72.9295	92.7628	83.7055	235.787	190.247	194.85
LTBR	1355.16	0.476868	0.0598514	7.96754	1.61863e-15	5.50292e-14	1232.71	1070.26	1095.98	1565.04	1591.45	1575.53
ZC3H11A	2004.69	0.376645	0.047427	7.94158	1.99625e-15	6.7691e-14	1721.95	1764.49	1745.54	2314.64	2282.97	2198.55
DEPDC1	815.134	0.567608	0.0715285	7.93541	2.09799e-15	7.09567e-14	638.133	675.273	655.135	982.446	1032.47	907.35
FSTL3	5392.91	-0.380899	0.048004	-7.93473	2.10953e-15	7.11625e-14	6652.79	5691.45	5958.71	4656.8	4634.34	4763.38
ATP2B4	3293.33	0.351724	0.0443633	7.92827	2.22214e-15	7.47681e-14	2768.28	2974.39	2939.74	3846.28	3575.16	3656.16
AZIN1	5616.14	0.309221	0.0390599	7.91659	2.44109e-15	8.19241e-14	5009.85	5123.9	4911.84	6458.6	6249.31	5943.35
IL6ST	3758.26	0.782672	0.0988717	7.91604	2.45198e-15	8.20783e-14	2771.32	3004.32	2512.28	5171.6	4665.34	4424.69
STK32A	399.084	0.769984	0.0974252	7.90333	2.71549e-15	9.06669e-14	307.924	308.212	267.858	476.486	532.265	501.76
DIXDC1	302.196	0.868808	0.110073	7.89301	2.94973e-15	9.82364e-14	212.711	207.469	220.982	414.592	398.665	358.759
SHF	1004.86	-0.505267	0.0640313	-7.89093	2.99937e-15	9.96356e-14	1145.6	1170.01	1224.33	820.343	794.123	874.736
IFNAR1	1111.52	0.462977	0.058815	7.87176	3.49689e-15	1.15574e-13	936.941	954.559	911.832	1308.62	1279.36	1277.82
LARP6	1195.48	0.466183	0.0592207	7.87197	3.49103e-15	1.15574e-13	984.548	984.483	1043.53	1330.23	1434.34	1395.73
SOBP	166.655	1.15695	0.147053	7.86762	3.61458e-15	1.19163e-13	98.2522	109.719	101.563	249.541	215.899	224.956
BOLA-DMA	182.808	1.11787	0.142137	7.86473	3.69908e-15	1.21641e-13	115.472	105.73	125	274.103	241.55	234.991
CLIP1	985.176	0.498489	0.0634037	7.86214	3.77613e-15	1.23863e-13	805.263	834.865	810.269	1198.58	1103.01	1159.07
LOC112442610	468.97	0.682125	0.0868673	7.8525	4.07826e-15	1.33438e-13	364.647	342.125	373.884	570.801	587.843	574.516
STXBP3	706.917	0.571659	0.072829	7.84934	4.18245e-15	1.36505e-13	567.229	570.541	566.965	856.693	876.421	803.653
IER5	1301.19	-0.473236	0.0604755	-7.82524	5.06683e-15	1.64956e-13	1542.66	1435.33	1563.62	1091.5	1024.99	1149.03
PTGDR2	138.614	1.30544	0.166938	7.81988	5.28751e-15	1.71713e-13	73.9424	92.7628	72.5447	220.068	181.697	190.669
NMUR2	187.535	1.12219	0.143528	7.81859	5.34178e-15	1.73045e-13	104.33	138.645	110.491	253.471	275.752	242.518
KHNYN	699.648	0.572609	0.0732404	7.81822	5.3576e-15	1.73127e-13	569.255	539.62	580.358	824.272	815.499	868.882
SCN9A	116.89	1.41199	0.180897	7.8055	5.92673e-15	1.91046e-13	57.7358	69.8215	63.6162	181.753	179.559	148.856
TNFSF9	140.305	1.26937	0.164297	7.72607	1.10917e-14	3.56656e-13	86.0973	79.796	80.3573	203.366	219.105	173.107
SLC16A1	1901.91	0.392671	0.0508608	7.7205	1.15871e-14	3.7167e-13	1577.1	1713.62	1641.74	2223.28	2167.54	2088.16
PARP12	548.898	0.624296	0.080914	7.71555	1.20463e-14	3.85451e-13	419.344	444.862	431.92	686.73	642.352	668.178
WSB1	1502.71	0.449395	0.0582843	7.7104	1.25427e-14	4.00355e-13	1225.62	1254.79	1332.59	1617.11	1799.87	1786.27
N4BP1	476.43	0.669017	0.0867757	7.70973	1.26086e-14	4.01476e-13	360.596	368.059	376.117	581.608	560.054	612.148
ELF3	283.765	-0.845415	0.109664	-7.70913	1.26681e-14	4.02389e-13	372.751	363.072	358.259	192.559	205.211	210.739
TRIP10	494.846	0.690223	0.0897712	7.6887	1.48643e-14	4.71003e-13	397.06	335.143	405.135	615.994	591.05	624.692
RCAN1	5822.09	-0.26495	0.0344769	-7.68486	1.53166e-14	4.84161e-13	6443.12	6345.77	6276.79	5403.45	5189.05	5274.34
STX11	240.462	0.956529	0.124645	7.67401	1.66695e-14	5.25653e-13	149.911	182.533	157.366	323.225	334.536	295.202
CMTM6	3524.48	0.301808	0.0393397	7.67186	1.69523e-14	5.33284e-13	3178.51	3223.76	3068.08	3854.14	3901.14	3921.26
NFIL3	783.424	0.547862	0.0714651	7.66614	1.77243e-14	5.56228e-13	628.004	641.36	639.51	870.447	985.439	935.783
DCDC2	898.292	0.557502	0.0727448	7.6638	1.80506e-14	5.65109e-13	723.217	780.005	676.34	1153.39	1008.95	1047.84
PTGER4	132.627	-1.36105	0.177868	-7.65199	1.97895e-14	6.18066e-13	213.724	170.564	187.5	90.3851	75.8852	57.7025
GLRX	147.359	1.19298	0.155968	7.64889	2.0272e-14	6.31624e-13	91.1618	87.7756	90.4019	218.103	185.972	210.739
LOC101907348	107.548	1.419	0.185586	7.64604	2.07269e-14	6.44262e-13	56.7229	56.8546	62.5001	145.402	150.702	173.107
RELL1	345.757	0.822671	0.107633	7.64326	2.11786e-14	6.56738e-13	265.382	261.332	220.982	470.592	453.174	403.081
NUCB1	860.231	0.509202	0.0666902	7.63533	2.25239e-14	6.96801e-13	715.114	692.23	723.215	967.71	1030.33	1032.79
MX2	81.3864	7.87102	1.03379	7.61375	2.66262e-14	8.21761e-13	0	0.997449	1.11607	164.069	150.702	171.435
JUN	1589.72	-0.422626	0.0556484	-7.59458	3.08787e-14	9.50758e-13	1907.31	1693.67	1862.73	1359.71	1350.97	1363.95
FAM83B	340.825	0.809196	0.106566	7.59336	3.11723e-14	9.57538e-13	244.111	258.339	241.072	465.68	385.839	449.912
CDCP1	3383.75	0.353293	0.046571	7.58612	3.29637e-14	1.01019e-12	2906.04	2883.63	3129.47	3885.57	3589.05	3908.71
TTC4	606.866	0.605177	0.0797842	7.58518	3.32035e-14	1.01516e-12	491.261	491.743	462.054	723.08	693.655	779.401
RNF114	1435.5	0.402275	0.0530632	7.58104	3.42783e-14	1.04557e-12	1250.94	1200.93	1258.93	1640.69	1622.45	1639.08
UBASH3B	733.475	0.549692	0.0725658	7.57507	3.58924e-14	1.09225e-12	554.061	625.401	607.144	881.254	858.251	874.736
RAB33B	272.02	0.862561	0.114008	7.56579	3.85518e-14	1.17045e-12	200.556	200.487	177.456	367.435	344.156	342.033
KLF4	79.997	1.67105	0.221248	7.55282	4.25936e-14	1.29016e-12	29.3744	38.9005	46.8751	121.823	117.569	125.44
HES2	889.556	-0.514925	0.0682416	-7.54562	4.50143e-14	1.36033e-12	1116.23	1009.42	1014.51	759.431	704.343	733.407
TRAM2	2703.6	-0.323365	0.0428607	-7.54456	4.53812e-14	1.36825e-12	3032.65	3008.31	2975.45	2474.78	2335.34	2395.07
NUP107	2049.27	0.404818	0.0537234	7.53523	4.87466e-14	1.46633e-12	1654.08	1876.2	1762.28	2350.99	2232.74	2419.32
FOXJ3	1088.72	0.476184	0.0636053	7.48655	7.07095e-14	2.1221e-12	846.792	964.534	919.644	1279.15	1295.39	1226.8
TMEM229B	1670.48	-0.394517	0.0527079	-7.48497	7.15629e-14	2.14278e-12	1900.22	1879.19	1916.3	1466.79	1358.45	1501.94
CPNE8	133.621	1.25957	0.168329	7.48275	7.27855e-14	2.17441e-12	75.9682	88.773	71.4287	203.366	165.665	196.523
KANK1	948.277	-0.5172	0.0691287	-7.4817	7.33674e-14	2.18678e-12	1052.41	1155.05	1142.86	839.009	726.788	773.547
TRAPPC8	1108.78	0.508869	0.0680576	7.47702	7.6024e-14	2.2608e-12	906.554	981.49	857.144	1395.07	1212.03	1300.4
MYO1E	2372.01	0.338134	0.045274	7.46861	8.10451e-14	2.40464e-12	2038.99	2180.42	2065.85	2662.43	2636.74	2647.62
RARA	1098.91	-0.456444	0.0611465	-7.46476	8.34489e-14	2.47035e-12	1283.36	1250.8	1282.37	937.254	872.146	967.561
FHDC1	396.753	0.69707	0.0936255	7.4453	9.67219e-14	2.8568e-12	293.744	303.225	311.384	474.522	503.408	494.234
PDGFA	671.41	-0.578823	0.0777665	-7.44309	9.83547e-14	2.89847e-12	830.586	769.034	815.849	522.661	506.614	583.715
LOC112441507	62.8213	2.02379	0.272024	7.43975	1.00877e-13	2.96611e-12	26.3356	31.9184	15.625	123.788	89.7797	89.4806
ETV6	707.277	0.54468	0.0732518	7.43572	1.04e-13	3.05105e-12	565.203	582.51	577.01	831.15	884.971	802.817
RBPJ	728.896	0.550659	0.0741796	7.42332	1.14218e-13	3.34331e-12	584.449	594.48	593.751	875.36	919.173	806.162
LOC101903126	82.6562	8.79073	1.19036	7.38495	1.52513e-13	4.45427e-12	0	0	1.11607	180.77	144.289	169.762
FITM2	653.779	0.583416	0.0790388	7.38138	1.56655e-13	4.55779e-12	504.429	576.526	487.724	771.22	805.88	776.892
KRT8	27577.4	0.245755	0.0332943	7.3813	1.56756e-13	4.55779e-12	26164.5	24832.5	24708.7	29852.6	29012.7	30893.4
ANKRD33B	9799.74	0.252737	0.0342918	7.37018	1.70401e-13	4.94351e-12	8760.65	9133.64	8931.93	10742.1	10949.9	10280.2
BFAR	1714.81	0.380852	0.0517713	7.35642	1.88901e-13	5.46808e-12	1407.94	1539.06	1522.32	1939.35	1955.92	1924.25
TOB2	668.101	-0.56564	0.0772572	-7.32152	2.45179e-13	7.08144e-12	839.702	748.087	803.573	517.749	571.811	527.685
RUNX1T1	520.085	0.614106	0.0840191	7.30913	2.68886e-13	7.74902e-12	401.112	402.97	428.572	633.678	656.247	597.931
PPRC1	1073.64	0.436223	0.0597644	7.29905	2.89806e-13	8.33351e-12	885.283	916.656	936.385	1220.2	1239.82	1243.53
JAK2	1019.92	0.48465	0.0665466	7.28287	3.26787e-13	9.37626e-12	844.766	903.689	801.34	1258.51	1132.93	1178.3
PTGFRN	1944.56	0.37871	0.0521344	7.26412	3.75479e-13	1.07262e-11	1663.2	1698.66	1712.06	2324.47	2067.07	2201.89
BCOR	584.029	0.628124	0.0864663	7.26437	3.74773e-13	1.07262e-11	423.396	478.776	475.447	767.291	643.421	715.845
FNDC3B	1288.52	0.456286	0.063003	7.2423	4.41136e-13	1.25743e-11	1039.25	1117.14	1101.56	1603.35	1482.43	1387.37
LOC112441472	77.6382	1.58948	0.219681	7.23537	4.64266e-13	1.32048e-11	43.5551	38.9005	33.4822	124.771	112.225	112.896
CEBPD	894.796	0.49542	0.0685276	7.2295	4.84769e-13	1.3758e-11	794.121	711.181	723.215	1078.73	996.127	1065.4
EPS8	1414.14	0.435706	0.0602942	7.22633	4.96218e-13	1.40523e-11	1198.27	1229.86	1177.46	1765.46	1558.32	1555.46
MRPL44	695.706	0.55288	0.0765274	7.22461	5.02545e-13	1.42007e-11	557.1	571.539	564.733	865.535	755.646	859.683
GTF2H1	761.176	0.506605	0.0705406	7.18176	6.88216e-13	1.94053e-11	602.681	660.312	623.885	909.745	868.939	901.496
IPO7	5697.15	0.345985	0.0483735	7.15238	8.5289e-13	2.39967e-11	4733.33	5462.03	4853.8	6644.28	6321.99	6167.47
GPR108	604.939	0.570716	0.0800293	7.13133	9.94032e-13	2.79077e-11	513.545	477.778	469.867	695.572	704.343	768.53
PPP1R13B	753.493	0.503371	0.0707752	7.11225	1.14166e-12	3.19837e-11	652.314	615.426	602.679	869.465	867.871	913.204
AMOTL1	1689.37	0.382736	0.0538407	7.10867	1.17171e-12	3.27031e-11	1426.18	1483.21	1491.07	2024.82	1827.66	1883.27
SP140L	101.387	1.40141	0.197144	7.10859	1.17235e-12	3.27031e-11	42.5422	55.8572	69.1965	158.174	137.876	144.674
TRIM8	2599.4	-0.297465	0.0418606	-7.10609	1.19377e-12	3.32296e-11	2873.62	2853.7	2871.66	2335.27	2340.69	2321.48
TSC22D1	1936.2	0.338453	0.0477216	7.09225	1.31952e-12	3.66516e-11	1694.6	1723.59	1710.94	2212.47	2170.75	2104.89
ISG15	28.3014	3.30989	0.467128	7.08561	1.38433e-12	3.83702e-11	7.09037	3.9898	4.46429	55.017	44.8899	54.3574
CD2AP	2887.4	0.37876	0.0534693	7.08368	1.40373e-12	3.88256e-11	2557.6	2645.24	2325.9	3491.61	3164.73	3139.35
MAST4	97.5183	1.36412	0.192592	7.08294	1.41132e-12	3.8953e-11	53.6842	61.8419	47.9911	139.507	135.738	146.347
CD46	3916.79	0.311562	0.0440241	7.07709	1.47213e-12	4.05456e-11	3356.78	3696.55	3429.69	4372.87	4452.65	4192.21
GRAMD1C	235.226	0.87573	0.123999	7.06241	1.6364e-12	4.49752e-11	158.014	183.531	156.25	317.33	284.302	311.928
XRN2	2655.64	0.30209	0.0431601	6.99929	2.57262e-12	7.05578e-11	2352.99	2438.76	2344.87	2951.27	2865.47	2980.46
STEAP3	367.673	0.695382	0.0996558	6.97783	2.99766e-12	8.20429e-11	259.305	289.26	294.643	461.75	428.591	472.491
IRF2BP2	1359.23	-0.378435	0.0542946	-6.97004	3.16862e-12	8.65405e-11	1565.96	1493.18	1551.34	1178.94	1169.27	1196.7
TIGAR	490.189	0.604839	0.086848	6.96433	3.29962e-12	8.99301e-11	403.138	369.056	393.974	574.731	627.389	572.843
GLUL	5008.8	-0.245518	0.0353227	-6.95072	3.63422e-12	9.88432e-11	5457.56	5420.14	5421.88	4525.15	4696.33	4531.73
CBLN3	25.2373	4.10016	0.590293	6.94598	3.75832e-12	1.02006e-10	1.01291	2.99235	4.46429	52.0697	44.8899	45.9947
WNT5A	927.55	-0.446333	0.0643043	-6.94095	3.89469e-12	1.05488e-10	1100.02	1058.29	1050.22	761.396	817.637	777.729
MIER1	724.641	0.541956	0.0781396	6.93574	4.04098e-12	1.09224e-10	592.552	625.401	550.224	920.552	864.664	794.454
RFFL	1027.12	0.432175	0.0625683	6.90724	4.94165e-12	1.33292e-10	846.792	858.804	919.644	1190.72	1142.55	1204.23
PEG10	19355.2	0.234414	0.033951	6.90449	5.03847e-12	1.35623e-10	17478.8	18028.9	17851.6	21918.4	20219.7	20634.1
BOLA	5603.62	0.265784	0.0386461	6.8774	6.09565e-12	1.63742e-10	5114.18	5011.19	5146.21	5986.05	5945.77	6418.35
TNS1	2301.77	-0.312069	0.045416	-6.87135	6.35991e-12	1.7049e-10	2478.59	2566.44	2604.91	2102.43	2021.11	2037.15
LOC101906312	48.3038	2.02217	0.294528	6.86578	6.61275e-12	1.76905e-10	21.2711	17.9541	17.8572	88.4202	79.0917	65.2289
PPARGC1B	498.544	-0.591018	0.0863178	-6.847	7.54143e-12	2.01336e-10	578.371	643.355	575.894	411.645	384.77	397.227
TAP2	680.499	0.556426	0.0813045	6.84373	7.71589e-12	2.05573e-10	516.584	617.421	516.742	826.237	835.806	770.202
BCL6	138.043	-1.08678	0.159154	-6.82849	8.58157e-12	2.28172e-10	171.182	190.513	202.009	86.4553	84.4357	93.662
TUBB2B	3698.86	-0.338667	0.0497574	-6.80637	1.00094e-11	2.65594e-10	4055.69	3951.89	4390.63	3094.71	3221.38	3478.87
AKAP1	1793.73	0.377004	0.0554584	6.79797	1.06102e-11	2.80967e-10	1455.55	1562.01	1667.41	1963.91	2013.63	2099.87
LUZP1	2894.57	0.352618	0.0519027	6.79382	1.09199e-11	2.88583e-10	2336.78	2623.29	2668.53	3408.11	3167.94	3162.76
SDCBP	1820.49	0.351207	0.0517976	6.78038	1.19862e-11	3.1612e-10	1642.94	1659.76	1495.54	2027.77	2041.42	2055.55
SALL1	534.03	0.553416	0.0816618	6.77692	1.22763e-11	3.23119e-10	430.486	438.878	429.688	613.046	630.596	661.488
KREMEN1	1841.45	-0.33128	0.048968	-6.76524	1.33089e-11	3.49593e-10	2052.15	2008.86	2097.1	1651.49	1580.76	1658.32
RASSF1	432.426	0.633897	0.0937046	6.76484	1.33455e-11	3.49849e-10	354.518	355.092	306.92	539.363	495.926	542.738
ANKS3	636.226	0.569499	0.0842128	6.76262	1.35522e-11	3.54558e-10	558.113	468.801	511.161	712.274	744.958	822.051
PLSCR2	1481.97	0.362446	0.0536225	6.75922	1.38732e-11	3.62229e-10	1299.56	1308.65	1281.25	1737.95	1639.55	1624.87
USP2	141.837	-1.0659	0.157965	-6.74774	1.50166e-11	3.91301e-10	207.646	183.531	185.268	98.2446	80.1605	96.1708
SLC4A4	369.553	0.669914	0.0993396	6.74367	1.54431e-11	4.01612e-10	289.692	306.217	258.929	470.592	447.83	444.058
QTRT2	458.29	0.626792	0.0929801	6.74115	1.57142e-11	4.07849e-10	325.144	402.97	352.679	551.152	548.298	569.498
ANO6	3269.01	0.319935	0.0474882	6.73715	1.61526e-11	4.18397e-10	2787.53	3118.03	2815.85	3736.24	3630.73	3525.7
CARNS1	187.138	-0.900817	0.133844	-6.73036	1.69245e-11	4.37523e-10	252.214	244.375	234.375	126.736	134.67	130.458
PRRX1	5358.34	-0.288737	0.0429236	-6.72677	1.73474e-11	4.47571e-10	5862.72	6126.33	5683.04	4780.58	5092.86	4604.49
MORC3	274.479	0.771076	0.114971	6.70668	1.99099e-11	5.1267e-10	206.634	221.434	179.688	359.575	336.674	342.87
RANBP2	4463.18	0.543658	0.081066	6.70637	1.99527e-11	5.1276e-10	3444.9	3802.28	3649.56	5749.28	4847.04	5286.05
ZNF710	321.336	0.695982	0.103922	6.69713	2.12546e-11	5.45145e-10	249.176	249.362	237.724	393.961	380.495	417.297
RRM2	5189.51	-0.254832	0.0380591	-6.6957	2.14648e-11	5.49458e-10	5569.99	5720.37	5645.1	4684.3	4937.88	4579.4
DCUN1D3	271.807	0.767263	0.114651	6.69219	2.19861e-11	5.61701e-10	205.621	193.505	205.357	342.874	316.367	367.121
PRMT9	377.905	0.649536	0.0970951	6.68969	2.23648e-11	5.70259e-10	315.015	279.286	287.947	474.522	464.931	445.731
NUMBL	200.016	0.959081	0.143377	6.6892	2.24387e-11	5.71026e-10	158.014	115.704	133.929	230.875	286.44	275.132
IL2RB	32.5262	2.57591	0.385645	6.67948	2.3979e-11	6.09038e-10	10.1291	8.97705	8.92858	66.8063	45.9587	54.3574
RND3	749.945	0.474911	0.0711837	6.67162	2.52987e-11	6.41309e-10	631.043	661.309	589.287	871.43	878.559	868.046
DDIT4L	185.583	-0.948469	0.142372	-6.66189	2.70326e-11	6.83935e-10	221.827	254.35	257.813	107.087	133.601	138.82
TGFB2	869.372	-0.462342	0.0694139	-6.66065	2.72614e-11	6.88391e-10	1012.91	1038.34	968.751	699.502	790.917	705.81
TAPBP	3686.34	0.268584	0.0403659	6.65373	2.85761e-11	7.20196e-10	3455.03	3211.79	3367.19	4020.17	3996.27	4067.6
FNBP4	970.078	0.424702	0.0639118	6.64513	3.0295e-11	7.62044e-10	794.121	829.878	862.724	1093.46	1091.25	1149.03
RAP2A	237.306	0.971965	0.146394	6.6394	3.14963e-11	7.90738e-10	131.678	191.51	157.366	376.277	276.821	290.185
LOC531038	546.536	0.549698	0.0828977	6.63104	3.33322e-11	8.35224e-10	443.654	468.801	418.527	666.099	615.632	666.505
TWF1	1096.79	0.478318	0.0721646	6.62815	3.39927e-11	8.50142e-10	913.644	983.485	851.564	1409.81	1189.58	1232.66
CSRNP2	383.128	0.645473	0.0980079	6.58592	4.52062e-11	1.12843e-09	284.628	328.161	283.483	479.434	448.899	474.164
ZDHHC23	540.056	0.548755	0.0833785	6.58149	4.65749e-11	1.16037e-09	415.293	461.819	438.617	675.923	615.632	633.054
PHLDB1	2572.95	-0.283685	0.0432103	-6.56522	5.19544e-11	1.29193e-09	2894.89	2758.95	2822.55	2316.61	2299	2345.73
GDAP1L1	132.194	1.08272	0.165025	6.56096	5.3464e-11	1.32694e-09	81.0327	90.7679	82.5894	159.156	188.11	191.505
KIF11	2375.17	0.351677	0.0537346	6.5447	5.96156e-11	1.47681e-09	2070.39	2216.33	1973.22	2837.3	2536.28	2617.52
PTK2	2482.65	0.284547	0.0435183	6.53857	6.21105e-11	1.5357e-09	2267.9	2220.32	2228.8	2681.1	2710.49	2787.28
CDC40	346.164	0.687349	0.105149	6.53691	6.28026e-11	1.54988e-09	271.46	279.286	243.304	422.452	464.931	395.554
GLIPR1	1242.78	0.36443	0.0558058	6.53033	6.56269e-11	1.61653e-09	1093.94	1103.18	1062.5	1395.07	1393.72	1408.27
FOXJ2	1911.74	0.324672	0.0497266	6.52915	6.6146e-11	1.62624e-09	1691.56	1686.69	1712.06	2149.59	2201.74	2028.78
SLC39A8	5285.01	0.29721	0.0456027	6.51739	7.15414e-11	1.75559e-09	4936.92	4902.46	4385.05	6064.64	5696.74	5724.25
PRSS23	7893.44	-0.204997	0.0316063	-6.48593	8.81847e-11	2.15995e-09	8507.43	8457.37	8392.87	7451.85	7334.15	7216.99
LDLR	4106.65	0.244669	0.0377332	6.48416	8.92252e-11	2.18134e-09	3697.12	3775.35	3806.93	4542.83	4355.38	4462.32
SPTLC2	2504.42	0.318226	0.0492243	6.46482	1.01421e-10	2.47486e-09	2156.48	2221.32	2312.5	2926.71	2631.4	2778.08
POLR2K	721.543	0.478621	0.0741055	6.45864	1.05647e-10	2.57318e-09	597.617	613.431	599.331	845.886	782.366	890.625
CITED2	124.067	-1.12269	0.17477	-6.42383	1.3289e-10	3.23068e-09	189.414	178.543	141.741	69.7537	85.5045	79.4454
ZUP1	380.295	0.615968	0.0959422	6.4202	1.361e-10	3.30257e-09	285.64	304.222	311.384	479.434	447.83	453.257
PARP10	650.836	0.487219	0.0759341	6.41634	1.39586e-10	3.37394e-09	556.087	512.689	558.037	729.958	766.334	781.91
SLC25A10	2790.92	-0.277409	0.0432364	-6.41609	1.39816e-10	3.37394e-09	3173.45	3024.27	2977.68	2495.41	2514.9	2559.81
KCTD6	115.069	1.11377	0.17358	6.41649	1.39454e-10	3.37394e-09	66.852	78.7985	72.5447	164.069	151.77	156.382
LRRC66	74.4176	1.42005	0.221417	6.41348	1.42239e-10	3.42606e-09	39.5035	45.8827	35.7143	104.139	117.569	103.697
CFLAR	323.479	0.653562	0.102073	6.40286	1.52492e-10	3.66628e-09	257.279	249.362	247.768	394.943	390.114	401.408
ABL1	1649.63	0.380097	0.0593825	6.40082	1.54543e-10	3.70876e-09	1387.69	1340.57	1575.9	1826.37	1840.48	1926.76
NES	23617.7	-0.185569	0.0289987	-6.39923	1.56161e-10	3.74071e-09	25458.5	25046	24895.1	21719.9	22710	21876.8
CCDC80	8343.52	-0.203636	0.0318239	-6.39883	1.56575e-10	3.74375e-09	8907.52	9001.98	8885.06	7928.34	7607.76	7730.46
LOC512672	212.366	0.877251	0.13721	6.39351	1.62121e-10	3.86927e-09	145.859	150.615	151.786	296.699	299.266	229.974
LOC112445390	150.002	0.980289	0.153642	6.38034	1.76693e-10	4.20936e-09	96.2264	96.7526	110.491	188.63	191.316	216.593
RIN2	869.432	-0.429555	0.0673333	-6.37954	1.77622e-10	4.22377e-09	1026.08	973.511	994.421	784.975	707.55	730.061
PPL	4647.72	-0.25146	0.039424	-6.37835	1.79009e-10	4.24901e-09	5144.57	4894.48	5120.54	4275.61	4084.98	4366.15
STXBP1	973.103	0.432065	0.0677558	6.37679	1.8084e-10	4.2847e-09	844.766	772.026	870.537	1056.13	1124.38	1170.77
VGLL3	948.198	-0.403444	0.0633384	-6.36967	1.89441e-10	4.48034e-09	1089.89	1113.15	1035.72	815.43	822.981	812.016
TMEM171	180.034	-0.892373	0.140122	-6.36855	1.90827e-10	4.49683e-09	238.034	213.454	250	126.736	135.738	116.241
JUND	1050.19	-0.397498	0.0624155	-6.36858	1.9079e-10	4.49683e-09	1241.83	1151.06	1190.85	903.851	871.077	942.473
TSPAN33	635.327	-0.494817	0.0777009	-6.36822	1.91231e-10	4.49824e-09	789.056	714.174	726.564	553.117	505.545	523.503
FOSL1	2193.62	-0.307093	0.0483256	-6.35466	2.08893e-10	4.90486e-09	2454.28	2328.05	2496.66	1889.24	2023.25	1970.25
TMEM268	274.02	0.710843	0.112034	6.34487	2.22618e-10	5.21772e-09	219.801	199.49	204.241	326.172	347.362	347.051
RABGGTB	688.323	0.467272	0.0736807	6.34185	2.27027e-10	5.31154e-09	608.759	576.526	547.992	801.676	781.297	813.688
HEXIM1	705.08	-0.460677	0.0726473	-6.34129	2.27855e-10	5.32136e-09	831.599	796.962	820.314	615.994	602.807	562.808
SF3B1	4153.88	0.263238	0.0415187	6.34023	2.29427e-10	5.34851e-09	3666.73	3965.86	3694.2	4658.76	4441.96	4495.77
RICTOR	243.035	0.82206	0.129812	6.33272	2.40877e-10	5.60544e-09	173.208	207.469	145.089	291.787	327.055	313.6
KSR1	392.566	-0.604953	0.0956742	-6.32305	2.5645e-10	5.95356e-09	488.222	469.799	464.286	319.295	284.302	329.489
SHISA5	906.69	0.412313	0.0652098	6.32287	2.56749e-10	5.95356e-09	797.16	744.097	793.528	1063.01	1007.88	1034.46
MTFR1	2307.02	0.330979	0.0523551	6.32181	2.58521e-10	5.98403e-09	2076.46	2116.59	1933.04	2526.85	2737.21	2451.94
ANKRD9	912.677	-0.418338	0.0662185	-6.31754	2.65766e-10	6.14084e-09	1103.06	1020.39	1007.81	758.449	806.949	779.401
CREB3L1	3784.25	-0.289312	0.0458899	-6.30447	2.89172e-10	6.66987e-09	4335.25	3867.11	4284.6	3383.54	3483.24	3351.76
EFNA4	97.4162	-1.23633	0.196512	-6.29134	3.14731e-10	7.24658e-09	154.975	112.712	142.857	53.0521	59.8531	61.0475
ATP2B1	9239.9	0.214342	0.0340783	6.28968	3.18114e-10	7.31158e-09	8458.81	8834.41	8369.43	10189	9754.99	9832.83
WASHC4	642.536	0.502927	0.080013	6.28556	3.26671e-10	7.49506e-09	559.126	518.674	515.626	802.659	764.196	694.938
EHHADH	242.903	0.753291	0.120084	6.27305	3.54041e-10	8.10878e-09	178.272	188.518	176.34	308.488	282.165	323.635
EPHA2	2683.42	-0.282636	0.0451018	-6.26662	3.68978e-10	8.43609e-09	2892.87	2882.63	3064.74	2429.59	2342.82	2487.9
NDRG1	6330.59	-0.21205	0.033971	-6.24209	4.31759e-10	9.85423e-09	6781.43	6657.98	6948.67	5816.08	5833.54	5945.86
LAD1	4351.54	-0.303776	0.0487026	-6.23738	4.4496e-10	1.01378e-08	5057.46	4377.81	4991.08	3849.22	3872.28	3961.4
RAB27A	824.973	0.419107	0.0672284	6.23407	4.54462e-10	1.03362e-08	726.256	706.194	684.153	949.043	965.132	919.058
PRKAB1	725.602	0.439164	0.0705303	6.22661	4.76642e-10	1.08218e-08	601.668	619.416	627.233	855.711	820.843	828.741
HEATR5B	428.205	0.591718	0.0950679	6.22416	4.84139e-10	1.0973e-08	311.976	371.051	341.518	548.205	498.064	498.415
MFSD2A	761.541	-0.44926	0.0721995	-6.22249	4.89331e-10	1.10714e-08	883.257	880.748	872.769	594.38	688.311	649.78
RBFOX2	2395.49	-0.326402	0.0525418	-6.21223	5.22371e-10	1.17985e-08	2567.73	2535.52	2896.21	2110.29	2090.58	2172.62
KANK2	581.303	-0.494579	0.0796772	-6.20729	5.39073e-10	1.21547e-08	680.675	660.312	700.894	479.434	456.38	510.123
SAV1	571.176	0.497912	0.0802392	6.20534	5.45776e-10	1.22847e-08	444.667	495.732	481.027	667.081	651.972	686.576
ACSL4	3297.17	0.261407	0.0421466	6.20232	5.5635e-10	1.25011e-08	2938.45	3072.14	2987.73	3724.45	3476.83	3583.41
B3GNT7	53.2761	-1.63943	0.264449	-6.19942	5.66727e-10	1.27124e-08	88.1231	80.7934	72.5447	26.526	29.9266	21.743
E2F2	631.734	0.464507	0.0749331	6.19896	5.68388e-10	1.27278e-08	525.7	522.664	544.644	749.606	723.582	724.208
SEC24B	1137.98	0.389245	0.062854	6.19285	5.90852e-10	1.32082e-08	967.328	1005.43	984.376	1371.49	1201.34	1297.89
SIAH2	532.054	-0.513304	0.0829221	-6.1902	6.00877e-10	1.33952e-08	642.185	632.383	603.796	436.206	413.628	464.128
ANKFY1	1474.25	0.366512	0.0592094	6.1901	6.01272e-10	1.33952e-08	1201.31	1346.56	1316.97	1749.74	1581.83	1649.12
LOC100848995	29.6324	2.41283	0.390916	6.17224	6.73284e-10	1.4974e-08	11.142	6.98215	10.0447	55.9994	45.9587	47.6672
AIDA	597.384	0.477032	0.0773251	6.16917	6.86489e-10	1.52417e-08	502.403	506.704	489.956	683.783	679.761	721.699
SWAP70	3401	-0.242538	0.039317	-6.16877	6.88228e-10	1.52543e-08	3642.42	3768.36	3646.21	3098.64	3156.18	3094.19
ADPGK	1210.09	0.353013	0.0572301	6.16831	6.90245e-10	1.52731e-08	1082.8	1048.32	1056.92	1315.5	1390.52	1366.46
LGALS3BP	2311.99	0.284314	0.0462002	6.15396	7.55716e-10	1.66935e-08	2120.02	2039.78	2094.87	2637.87	2488.18	2491.24
CDKN1A	1144.24	-0.374752	0.0610026	-6.14321	8.08686e-10	1.78334e-08	1325.9	1217.89	1332.59	964.762	1024.99	999.34
TRIM5	679.516	0.481372	0.0783868	6.14098	8.2013e-10	1.80553e-08	554.061	627.396	518.974	784.975	793.054	798.635
ATP6V0A2	575.247	0.49979	0.0814703	6.13463	8.53588e-10	1.87287e-08	460.874	519.671	448.661	675.923	664.797	681.558
TRAK2	318.982	0.701056	0.114276	6.13477	8.52806e-10	1.87287e-08	222.84	252.355	253.349	448.978	382.633	353.741
YRDC	495.775	0.514931	0.0841893	6.11634	9.57472e-10	2.09728e-08	416.306	402.97	405.135	560.977	603.875	585.387
SDC1	3567.79	0.2528	0.041438	6.10066	1.0563e-09	2.30989e-08	3408.44	3221.76	3136.17	3913.08	3863.73	3863.56
FBXO30	317.113	0.668062	0.109595	6.09571	1.08952e-09	2.37854e-08	221.827	278.288	234.375	405.75	379.426	383.01
ITGA6	29490.9	0.208021	0.034142	6.09283	1.10934e-09	2.41777e-08	26832	28236.8	27033.5	33024.9	31169.6	30648.4
RBCK1	631.467	0.483808	0.0796405	6.0749	1.24062e-09	2.69938e-08	529.752	488.75	562.501	694.589	751.371	761.84
IL6	76.5482	-1.30902	0.215926	-6.06233	1.34167e-09	2.91439e-08	107.368	116.702	102.679	51.0872	43.821	37.632
KIAA0930	11216.6	-0.2192	0.0361731	-6.05974	1.36345e-09	2.95678e-08	11626.2	12302.5	12273.5	10801	10071.4	10225
DUSP10	171.132	0.877682	0.144989	6.05343	1.41797e-09	3.06992e-08	111.42	120.691	129.464	228.91	237.275	199.032
EHD2	2309.76	-0.279833	0.0462815	-6.04633	1.48184e-09	3.20289e-08	2556.58	2452.73	2592.64	2037.59	2068.14	2150.88
RAPH1	990.812	0.424082	0.0704588	6.01886	1.75646e-09	3.79018e-08	776.901	929.623	831.474	1193.67	1105.15	1108.05
PXDC1	295.808	-0.680099	0.113229	-6.00643	1.89653e-09	4.08568e-08	350.467	347.112	396.206	250.524	203.073	227.465
NEXN	3766.92	-0.263451	0.0440211	-5.98465	2.16861e-09	4.66413e-08	4160.02	4262.1	3904.02	3312.81	3562.33	3400.26
TBK1	635.266	0.470165	0.0787679	5.96899	2.38734e-09	5.1261e-08	509.493	583.508	504.465	729.958	733.201	750.968
XIAP	528.21	0.492257	0.0825964	5.95979	2.52566e-09	5.4142e-08	448.719	457.829	409.599	609.117	620.976	623.019
EHD3	998.377	-0.390599	0.0655688	-5.95709	2.56762e-09	5.49514e-08	1198.27	1135.1	1062.5	885.184	879.627	829.577
PPP1R9B	1225.06	-0.334627	0.0562243	-5.95164	2.65472e-09	5.67224e-08	1398.83	1358.53	1341.52	1073.81	1095.53	1082.13
CTSS	290.719	0.64595	0.108754	5.93958	2.85753e-09	6.0956e-08	222.84	233.403	224.331	359.575	334.536	369.63
DUSP1	548.835	-0.60512	0.101999	-5.93262	2.98146e-09	6.3496e-08	656.365	582.51	750.001	487.293	371.945	444.894
DOCK8	1020.54	0.401215	0.0676731	5.92873	3.05288e-09	6.49109e-08	825.521	923.638	889.51	1247.71	1106.21	1130.63
MTPN	2276.53	0.309457	0.0522789	5.91935	3.23223e-09	6.86126e-08	1956.94	2114.59	2027.9	2698.78	2416.57	2444.41
STARD3	226.972	0.770469	0.13059	5.8999	3.6372e-09	7.70838e-08	144.846	169.566	189.732	259.366	293.922	304.401
TUBB6	5570.1	-0.208323	0.0353136	-5.89922	3.65218e-09	7.72759e-08	6060.24	5830.09	6024.56	5066.48	5251.04	5188.2
LRRK1	630.431	0.472482	0.0801082	5.89805	3.67829e-09	7.77023e-08	487.209	527.651	571.429	719.151	708.618	768.53
CDC42EP1	1596.26	0.360695	0.0611723	5.89637	3.71576e-09	7.83671e-08	1527.47	1259.78	1406.25	1787.07	1807.35	1789.61
TRIB2	75.2829	1.28992	0.218856	5.89393	3.77106e-09	7.94051e-08	44.568	38.9005	47.9911	96.2797	106.881	117.077
HOXC4	271.085	-0.657676	0.111739	-5.8858	3.96134e-09	8.32775e-08	346.415	318.186	330.358	212.208	216.968	202.377
USP9X	2414.73	0.273841	0.0465641	5.88095	4.07929e-09	8.56191e-08	2180.79	2265.21	2109.38	2689.94	2689.12	2553.96
FAM91A1	2242.6	0.322867	0.0549458	5.87611	4.20022e-09	8.80159e-08	2000.5	2126.56	1848.22	2634.92	2441.15	2404.27
UBR1	583.274	0.529756	0.0902061	5.87273	4.2868e-09	8.96861e-08	404.151	531.641	496.653	708.344	672.279	686.576
SEMA3C	629.781	0.516196	0.0879799	5.8672	4.43203e-09	9.25762e-08	545.958	547.6	459.822	822.308	702.206	700.792
NRP2	735.4	0.424434	0.072401	5.86227	4.56588e-09	9.52197e-08	586.475	652.332	645.09	865.535	840.082	822.887
KCTD10	2027.38	0.291992	0.0498375	5.85888	4.65986e-09	9.70246e-08	1830.33	1740.55	1900.67	2273.38	2154.71	2264.61
UGCG	509.48	0.565757	0.096599	5.85676	4.7198e-09	9.81162e-08	409.215	440.873	382.813	671.993	524.784	627.201
GSE1	923.487	-0.36934	0.0631968	-5.84429	5.08734e-09	1.05589e-07	1022.03	1036.35	1064.73	816.413	806.949	794.454
BCL10	706.194	0.435049	0.0746622	5.8269	5.64665e-09	1.17011e-07	590.526	642.357	566.965	834.097	822.981	780.238
KDM2A	1758.82	0.307546	0.0528064	5.82403	5.74444e-09	1.18849e-07	1583.18	1538.07	1598.22	1902.02	1872.55	2058.89
PTHLH	190.615	-0.799636	0.137441	-5.81804	5.95405e-09	1.22991e-07	250.189	239.388	235.491	132.63	161.39	124.604
C1QTNF6	1189.45	-0.343365	0.0590481	-5.81501	6.0632e-09	1.2485e-07	1388.7	1312.64	1290.18	1074.8	1010.02	1060.39
KIAA1551	2205.15	0.335611	0.0577146	5.81501	6.06286e-09	1.2485e-07	1926.55	2046.77	1872.77	2663.41	2459.32	2262.1
ZBTB7B	664.635	-0.459506	0.0790644	-5.81179	6.18069e-09	1.27069e-07	834.637	728.138	746.653	585.538	525.853	566.989
TFDP2	1164.12	-0.336195	0.0579048	-5.80599	6.39854e-09	1.31341e-07	1274.24	1283.72	1339.29	1020.76	1050.64	1016.06
ABCC5	256.348	0.695096	0.119729	5.8056	6.41377e-09	1.31447e-07	191.44	178.543	217.634	298.664	339.88	311.928
NAV2	999.84	0.41963	0.0722853	5.80519	6.42917e-09	1.31556e-07	775.889	921.643	870.537	1173.04	1057.05	1200.88
SLC20A1	2753.43	0.251449	0.0434881	5.78203	7.38064e-09	1.50789e-07	2511	2487.64	2546.88	2953.23	2916.77	3105.06
SIX1	327.575	0.628241	0.10872	5.77855	7.53485e-09	1.53699e-07	292.731	234.401	244.42	380.207	418.972	394.718
SH3RF2	17.8943	4.63308	0.802246	5.77514	7.68886e-09	1.56596e-07	2.02582	0.997449	1.11607	38.3154	33.133	31.7782
TNFRSF6B	35.0348	1.97586	0.342421	5.77026	7.91471e-09	1.60945e-07	13.1678	12.9668	16.7411	56.9819	45.9587	64.3926
EPSTI1	107.555	1.06913	0.185424	5.76587	8.12353e-09	1.64934e-07	58.7487	84.7832	64.7322	146.384	136.807	153.873
PHLDB2	2718.04	-0.241444	0.0419665	-5.75326	8.75412e-09	1.77461e-07	2907.05	3000.33	2927.46	2524.89	2461.46	2487.06
NUFIP1	444.937	0.509266	0.0885393	5.75187	8.82635e-09	1.78648e-07	381.867	349.107	370.536	528.556	526.921	512.632
LOC101904435	365.165	0.581013	0.101046	5.74996	8.92668e-09	1.80399e-07	268.421	325.169	283.483	442.101	447.83	423.988
HSPB1	5240.3	-0.252352	0.0439286	-5.7446	9.2138e-09	1.85914e-07	6029.85	5434.1	5630.59	4593.92	4777.56	4975.79
BoLA	1103.92	0.349411	0.0608499	5.74218	9.34668e-09	1.88304e-07	1021.01	955.557	936.385	1218.23	1219.51	1272.8
USP6NL	1275.32	0.329085	0.0574402	5.72917	1.00921e-08	2.03008e-07	1086.85	1175	1128.35	1399.99	1468.54	1393.22
MANEA	180.626	0.800267	0.140065	5.71354	1.1065e-08	2.22235e-07	146.872	119.694	128.348	224.98	244.757	219.102
PPP1R3D	209.273	0.744364	0.130299	5.71272	1.11186e-08	2.2297e-07	149.911	141.638	178.572	264.278	258.651	262.588
RRBP1	4059.93	-0.211218	0.0369754	-5.7124	1.11391e-08	2.23039e-07	4364.63	4311.97	4395.1	3800.1	3697	3790.8
CDC42EP3	1501.14	-0.315427	0.0552226	-5.71193	1.11703e-08	2.2332e-07	1653.07	1759.5	1580.36	1350.86	1319.98	1343.05
RAP2B	803.653	-0.407079	0.0713246	-5.70742	1.14704e-08	2.2897e-07	920.735	859.801	968.751	659.221	719.306	694.102
FZD8	1253.99	-0.332	0.0582084	-5.70365	1.1727e-08	2.33378e-07	1373.51	1368.5	1449.78	1141.6	1131.87	1058.71
KLHL14	76.8354	-1.2535	0.219771	-5.70367	1.17252e-08	2.33378e-07	94.2006	109.719	120.536	54.0345	44.8899	37.632
PPP4R2	1338.57	0.324659	0.0569648	5.6993	1.20301e-08	2.39046e-07	1143.57	1246.81	1174.11	1532.62	1486.71	1447.58
DDX3X	5468.2	0.269126	0.0472605	5.69451	1.23727e-08	2.4548e-07	4805.24	5295.46	4774.56	6324.01	5942.56	5667.38
BAIAP2	651.909	-0.41909	0.0737967	-5.67898	1.355e-08	2.6843e-07	757.656	754.072	726.564	556.065	545.091	572.007
ANKRD1	452.849	-0.499289	0.0880467	-5.67074	1.42185e-08	2.81247e-07	515.571	535.63	539.063	377.259	393.321	356.25
TNK2	1451.15	-0.305408	0.0540813	-5.64721	1.63076e-08	3.22081e-07	1592.29	1571.98	1650.67	1319.43	1246.23	1326.32
EARS2	560.741	0.480277	0.0851392	5.64108	1.6899e-08	3.33257e-07	425.422	510.694	467.635	651.362	682.967	626.364
INAVA	41.5599	1.72443	0.305938	5.63654	1.73506e-08	3.41647e-07	23.2969	20.9464	13.3929	69.7537	60.9219	61.0475
CSRP1	5931.86	-0.214919	0.0381746	-5.62989	1.80327e-08	3.54543e-07	6626.45	6094.42	6398.45	5386.75	5548.17	5536.93
PUM1	1538.94	0.324314	0.0576247	5.62803	1.82276e-08	3.57836e-07	1396.8	1365.51	1338.17	1833.24	1598.93	1700.97
MMP25	31.8949	2.0323	0.361233	5.62601	1.84421e-08	3.61504e-07	13.1678	7.9796	16.7411	49.1223	49.1651	55.1937
BAHCC1	559.418	-0.443761	0.0789911	-5.61786	1.93341e-08	3.78421e-07	646.236	648.342	640.626	478.451	455.311	487.544
CBX6	496.577	-0.477951	0.085176	-5.61133	2.00773e-08	3.92379e-07	606.733	547.6	580.358	428.347	400.802	415.625
LPP	2175.34	0.285223	0.0508343	5.61083	2.01354e-08	3.92927e-07	2089.63	1930.06	1860.49	2369.66	2461.46	2340.71
SETBP1	536.205	0.49505	0.0883478	5.60342	2.10159e-08	4.09496e-07	432.512	457.829	445.313	695.572	569.674	616.329
TNC	39.3665	1.75153	0.313341	5.58986	2.27248e-08	4.42135e-07	20.2582	15.9592	17.8572	52.0697	67.3348	62.7201
C2	12.2525	6.99932	1.25346	5.584	2.35049e-08	4.56632e-07	0	0	0	28.4909	22.4449	22.5792
NUFIP2	1634.92	0.295471	0.0529171	5.58366	2.35509e-08	4.56846e-07	1465.68	1454.28	1482.15	1841.1	1858.65	1707.66
MAGI3	634.985	0.431255	0.0772797	5.58044	2.39912e-08	4.64696e-07	529.752	564.556	526.786	765.326	731.063	692.429
DANCR	371.84	0.556189	0.0997551	5.57555	2.46753e-08	4.77238e-07	296.782	294.248	311.384	424.417	485.238	418.97
MC1R	25.1404	2.50129	0.448837	5.57282	2.50646e-08	4.84051e-07	5.06455	11.9694	5.58037	39.2979	32.0642	56.8662
GAB1	395.007	0.566809	0.101718	5.57237	2.5129e-08	4.84577e-07	293.744	318.186	342.634	501.048	493.788	420.643
SDS	27.5325	2.2188	0.398257	5.57128	2.5287e-08	4.86905e-07	11.142	5.9847	12.2768	51.0872	39.5458	45.1584
ATXN7	700.771	0.418049	0.0751229	5.56487	2.62345e-08	5.04406e-07	567.229	625.401	607.144	850.798	773.816	780.238
C7H19orf66	483.009	0.498494	0.0896647	5.55953	2.70504e-08	5.19327e-07	436.564	390.003	375.001	556.065	540.816	599.604
TTF1	334.93	0.619478	0.11146	5.55784	2.73136e-08	5.23611e-07	287.666	284.273	219.866	414.592	378.357	424.824
HIF1A	2217.11	0.286301	0.0516378	5.54442	2.94938e-08	5.64578e-07	1994.42	2039.78	1958.71	2616.25	2319.31	2374.16
SPTY2D1	270.671	0.642969	0.116046	5.54065	3.01345e-08	5.75997e-07	196.504	229.413	208.706	326.172	307.816	355.414
TRIB1	1523.65	0.291819	0.0527328	5.53392	3.13153e-08	5.97692e-07	1398.83	1353.54	1359.38	1653.46	1640.62	1736.09
BTG1	928.55	-0.375548	0.0678733	-5.53308	3.14656e-08	5.99683e-07	1115.21	1023.38	1005.58	783.01	857.182	786.928
CTC1	301.718	0.599097	0.108309	5.53137	3.17732e-08	6.04664e-07	224.866	244.375	251.116	338.944	373.013	377.993
ATP1B1	1113.71	0.328629	0.0594461	5.52819	3.23557e-08	6.14853e-07	992.651	984.483	986.609	1241.81	1193.86	1282.83
EDN1	142.546	0.859181	0.1555	5.52526	3.2899e-08	6.24268e-07	106.355	96.7526	100.447	176.84	200.936	173.944
CD55	549.695	0.443623	0.0803811	5.51899	3.40951e-08	6.46025e-07	469.99	477.778	448.661	625.818	656.247	619.674
ARHGAP24	122.523	0.988808	0.179201	5.51788	3.4312e-08	6.49193e-07	79.0069	99.7449	66.9644	185.682	150.702	153.037
IGFBP3	89.6256	1.15761	0.211097	5.48379	4.16304e-08	7.8652e-07	48.6196	59.847	58.0358	95.2973	142.151	133.803
SLC20A2	128.656	0.893592	0.163099	5.47882	4.28177e-08	8.07782e-07	81.0327	99.7449	89.2858	171.928	163.527	166.417
FADS1	426.176	0.501555	0.0916079	5.47502	4.37474e-08	8.2413e-07	336.286	378.033	343.751	483.364	513.027	502.597
PPM1H	1735.74	-0.26983	0.0494301	-5.45883	4.79288e-08	9.016e-07	1908.32	1850.27	1935.27	1595.49	1548.7	1576.36
LOC101905151	201.12	0.757283	0.138756	5.45765	4.82468e-08	9.06277e-07	165.104	123.684	160.715	250.524	234.069	272.623
STK40	196.975	0.765374	0.14027	5.45643	4.85791e-08	9.11207e-07	157.001	126.676	155.134	229.892	233	280.15
KLF10	1659.26	0.281872	0.0516796	5.45423	4.91851e-08	9.2125e-07	1544.69	1512.13	1434.15	1854.86	1827.66	1782.09
PROM1	48.5979	1.48528	0.272463	5.45131	5.00001e-08	9.35174e-07	29.3744	24.9362	22.3215	69.7537	71.61	73.5915
ADAM9	2584.06	0.229279	0.0420894	5.44742	5.11054e-08	9.54479e-07	2368.18	2396.87	2371.66	2802.92	2799.2	2765.54
CDC42EP4	415.239	-0.492052	0.0904442	-5.4404	5.31621e-08	9.91473e-07	502.403	473.788	479.911	348.768	342.018	344.542
NUP214	1642.34	0.290498	0.0534186	5.43814	5.38404e-08	1.00269e-06	1462.64	1562.01	1407.37	1823.42	1768.87	1829.75
HSD17B12	1061.59	0.329923	0.0606783	5.43725	5.41107e-08	1.00561e-06	937.954	974.508	908.483	1161.25	1209.89	1177.46
DUSP5	352.483	0.545742	0.100373	5.43711	5.41512e-08	1.00561e-06	292.731	272.304	295.759	399.856	409.353	444.894
BCL9L	964.281	-0.362707	0.0667284	-5.43558	5.46197e-08	1.01287e-06	1152.69	1010.42	1092.64	825.255	835.806	868.882
LGR4	1949.82	-0.261888	0.0481854	-5.43501	5.47925e-08	1.01463e-06	2093.68	2169.45	2116.07	1832.26	1722.92	1764.52
SRC	665.216	-0.405864	0.0746841	-5.4344	5.4981e-08	1.01668e-06	765.759	749.085	760.046	608.134	542.953	565.317
RIPK2	1323.74	0.322937	0.0594307	5.43385	5.51513e-08	1.01839e-06	1228.66	1160.03	1138.39	1391.14	1554.04	1470.16
AIF1L	1117.72	0.342089	0.0630113	5.42901	5.66688e-08	1.04493e-06	920.735	1012.41	1024.56	1195.64	1298.6	1254.4
RNF2	2291.48	-0.267536	0.0493523	-5.42093	5.92888e-08	1.0917e-06	2483.65	2553.47	2468.75	2154.5	2140.82	1947.67
FGFR1OP2	463.522	0.47949	0.0884795	5.41922	5.9859e-08	1.10065e-06	395.035	377.036	389.509	577.678	518.371	523.503
CALM1	22963.2	-0.143781	0.0265454	-5.4164	6.08103e-08	1.11657e-06	24008	24241	24072.6	21639.4	21729.9	22088.3
TMEM236	775.198	0.436545	0.0806321	5.41404	6.162e-08	1.12984e-06	664.469	738.113	571.429	896.973	913.829	866.373
POLI	251.983	0.656413	0.121372	5.40828	6.36331e-08	1.16512e-06	185.362	204.477	197.545	274.103	314.229	336.18
LOC112443745	238.761	-0.647891	0.119863	-5.40525	6.4717e-08	1.18331e-06	310.963	280.283	283.483	174.875	188.11	194.85
ALCAM	2172.34	0.289497	0.0536625	5.39478	6.86094e-08	1.25272e-06	1856.66	2039.78	1967.64	2551.41	2343.89	2274.65
DENND5A	3128.65	0.226374	0.0419838	5.39192	6.97075e-08	1.27099e-06	2802.72	2979.38	2869.42	3436.6	3299.4	3384.37
RSL1D1	3435.51	0.221172	0.0411334	5.37696	7.57557e-08	1.37934e-06	3067.09	3260.66	3188.62	3661.58	3793.19	3641.94
PNPT1	693.531	0.400352	0.074465	5.37638	7.59979e-08	1.38183e-06	551.023	621.411	621.653	792.834	789.848	784.419
SNAP23	461.591	0.484018	0.0900821	5.37308	7.74041e-08	1.40544e-06	399.086	398.98	354.911	555.082	554.71	506.778
JMJD1C	496.592	0.508451	0.0946402	5.37246	7.7669e-08	1.40829e-06	356.544	469.799	402.902	591.433	591.05	567.826
AMOT	1205.05	-0.356245	0.0663518	-5.36904	7.91571e-08	1.43328e-06	1225.62	1469.24	1363.84	1090.52	1047.43	1033.63
JMY	233.425	-0.653383	0.121753	-5.36648	8.02866e-08	1.45172e-06	285.64	303.225	267.858	178.805	171.009	194.014
GRPEL2	331.478	0.577887	0.107718	5.3648	8.10393e-08	1.4633e-06	238.034	290.258	268.974	377.259	429.66	384.683
CEP170	1126.72	0.327626	0.0610943	5.36263	8.20189e-08	1.47895e-06	998.729	1008.42	991.073	1328.27	1192.79	1241.02
MAP2	163.945	0.761303	0.141988	5.36173	8.2427e-08	1.48425e-06	117.497	124.681	122.768	204.349	209.486	204.886
PHC2	3126.04	0.216194	0.0403518	5.35774	8.42676e-08	1.51531e-06	2904.01	2863.68	2910.72	3294.14	3354.98	3428.7
REPIN1	603.725	-0.457389	0.0853965	-5.35606	8.50558e-08	1.52738e-06	774.876	643.355	677.456	542.31	488.444	495.907
LOC515551	1542.32	0.303172	0.0566342	5.35317	8.64257e-08	1.54985e-06	1337.04	1460.27	1342.64	1763.49	1731.47	1619.01
TWISTNB	905.505	0.343417	0.0642022	5.34899	8.84456e-08	1.58389e-06	777.914	825.888	790.18	1013.88	1024.99	1000.18
MMP1	27.5508	2.11277	0.395297	5.34476	9.05392e-08	1.61916e-06	8.10327	12.9668	10.0447	48.1399	34.2018	51.8486
LOC618367	10.3739	6.76329	1.26696	5.33819	9.38806e-08	1.67662e-06	0	0	0	17.684	20.3073	24.2518
CDC42SE1	2891.03	0.222617	0.0417225	5.33565	9.52033e-08	1.69792e-06	2637.62	2692.12	2675.23	3200.81	3069.61	3070.77
ITGB8	120.317	0.907039	0.170267	5.32716	9.9761e-08	1.77678e-06	86.0973	90.7679	73.6608	168.981	156.046	146.347
ASXL1	1766.13	0.280398	0.0527198	5.31864	1.04546e-07	1.85946e-06	1565.96	1561.01	1658.48	1846.02	2024.32	1940.98
NECTIN2	550.413	0.423099	0.0796868	5.30953	1.0991e-07	1.95222e-06	486.196	463.814	460.938	621.888	627.389	642.253
MOB3B	716.175	0.39455	0.074364	5.30566	1.12268e-07	1.99139e-06	640.159	600.465	617.188	845.886	754.577	838.776
BPNT1	330.185	0.579002	0.10928	5.29834	1.16859e-07	2.07001e-06	244.111	265.322	284.599	367.435	442.486	377.157
KCNAB2	1685.1	-0.267079	0.0504554	-5.29337	1.20082e-07	2.12422e-06	1841.47	1808.38	1870.54	1533.6	1572.21	1484.37
2021-03-03	330.97	-0.536164	0.101495	-5.28267	1.27311e-07	2.24905e-06	381.867	404.964	388.393	255.436	280.027	275.132
PLIN2	667.095	0.411609	0.0779709	5.27901	1.29882e-07	2.29136e-06	536.842	583.508	599.331	771.22	709.687	801.98
BCAR3	1423.45	0.308476	0.0584607	5.27664	1.31571e-07	2.31803e-06	1236.76	1317.63	1263.39	1599.42	1468.54	1654.97
BCL7A	113.18	-0.955247	0.181302	-5.2688	1.37317e-07	2.41599e-06	169.156	135.653	142.857	63.859	89.7797	77.7729
MEF2D	865.864	-0.342046	0.0649398	-5.26713	1.38574e-07	2.43382e-06	990.625	942.59	970.984	764.343	763.128	763.512
LMNA	9753.5	-0.174956	0.0332176	-5.26696	1.38703e-07	2.43382e-06	10676.1	10157	10200.9	9286.08	8957.66	9243.26
LGALS3	5942.86	-0.188135	0.0357275	-5.26583	1.39556e-07	2.4455e-06	6234.46	6367.72	6391.75	5557.7	5384.65	5720.91
KRT18	6534.51	0.180585	0.0343125	5.26294	1.41773e-07	2.48103e-06	6213.19	6131.32	6035.72	6846.67	6846.77	7133.36
LOC104969299	48.0228	1.42849	0.271733	5.25696	1.46453e-07	2.55949e-06	24.3098	26.9311	26.7858	67.7888	73.7476	68.5739
IL1R1	1110.71	0.329313	0.0626509	5.25631	1.46971e-07	2.56511e-06	1006.83	950.569	996.653	1316.48	1177.82	1215.93
LOC100140873	19.9108	2.52442	0.4804	5.25483	1.4816e-07	2.58242e-06	5.06455	5.9847	6.69644	35.3681	32.0642	34.287
KNL1	1525.2	0.359694	0.0685082	5.25038	1.51788e-07	2.64212e-06	1278.29	1464.26	1263.39	1888.26	1663.06	1593.93
INTS5	519.753	0.426706	0.0813354	5.24625	1.55226e-07	2.69838e-06	441.628	435.885	453.126	602.24	591.05	594.586
LOC112442249	16.6452	6.46621	1.23272	5.24549	1.55863e-07	2.70585e-06	1.01291	0	0	31.4383	33.133	34.287
RASSF8	1400.4	-0.314383	0.0599633	-5.24292	1.58058e-07	2.74029e-06	1612.55	1612.88	1428.57	1273.25	1275.09	1200.04
GLRX5	1324.14	-0.319591	0.0609628	-5.24239	1.58509e-07	2.74447e-06	1582.16	1413.39	1416.3	1195.64	1122.25	1215.1
TUBB2A	3529.39	-0.481202	0.0918019	-5.24175	1.59063e-07	2.75042e-06	4179.26	3818.24	4342.64	2788.18	2794.93	3253.08
DDIT4	191.303	-0.697491	0.133176	-5.23737	1.62883e-07	2.81274e-06	246.137	246.37	217.634	147.367	138.945	151.364
COQ8B	336.075	0.530962	0.101683	5.22175	1.77237e-07	3.05658e-06	281.589	258.339	285.715	391.014	385.839	413.952
REC8	17.4845	2.89516	0.554723	5.2191	1.79793e-07	3.09657e-06	7.09037	2.99235	2.23215	25.5436	35.2706	31.7782
FAM46B	140.523	-0.811024	0.15549	-5.21594	1.8289e-07	3.14576e-06	188.401	181.536	166.295	103.157	110.087	93.662
SERTAD1	493.558	0.439834	0.0844023	5.21116	1.87663e-07	3.22361e-06	439.603	399.977	417.411	564.907	563.261	576.188
FYB1	50.0539	1.44848	0.278359	5.20363	1.95437e-07	3.35273e-06	33.426	25.9337	21.2054	72.701	60.9219	86.1355
SLC12A2	5215.91	0.263272	0.0506356	5.19935	1.99987e-07	3.42629e-06	4740.42	5051.08	4428.58	6102.96	5587.72	5384.73
ITGB3	4194.8	-0.190206	0.0365879	-5.1986	2.00795e-07	3.43562e-06	4488.2	4495.5	4428.58	3986.77	3874.42	3895.33
ING1	808.527	-0.352312	0.0678365	-5.19355	2.06319e-07	3.52277e-06	887.309	943.587	888.394	700.484	728.926	702.465
LYST	136.458	0.893173	0.17198	5.19345	2.06428e-07	3.52277e-06	88.1231	90.7679	108.259	211.226	146.426	173.944
STK3	832.635	0.367859	0.0708375	5.193	2.06933e-07	3.52677e-06	682.701	756.067	742.189	884.202	986.508	944.146
LOC107132911	50.2123	1.38386	0.266504	5.19265	2.0732e-07	3.52877e-06	25.3227	25.9337	32.3661	76.6308	71.61	69.4102
CRLF3	815.447	0.371123	0.071484	5.1917	2.08386e-07	3.54228e-06	695.869	763.049	674.108	960.832	876.421	922.403
BSG	10759.5	-0.171271	0.0330007	-5.18992	2.10386e-07	3.57164e-06	11697.1	10964	11531.3	10139.8	10177.2	10047.8
CNR1	251.596	-0.620583	0.119594	-5.18907	2.11347e-07	3.5833e-06	278.55	326.166	309.152	209.261	204.142	182.306
EIF2AK4	685.105	0.388909	0.0749926	5.18597	2.14891e-07	3.63865e-06	573.307	579.518	628.349	812.483	741.751	775.22
MYL9	3597.88	-0.221433	0.0427102	-5.18456	2.16527e-07	3.66161e-06	4071.9	3806.27	3739.96	3265.65	3397.73	3305.77
HSPA8	52630.1	0.153628	0.0296514	5.18112	2.20556e-07	3.72491e-06	49243.6	50050	50204.3	54924.6	53961.9	57396.4
ATP2A2	3984.12	0.211176	0.0407612	5.18082	2.20912e-07	3.72611e-06	3552.27	3759.39	3768.98	4406.27	4158.72	4259.11
CCDC174	315.425	-0.553309	0.106806	-5.1805	2.21294e-07	3.72772e-06	383.893	399.977	341.518	243.647	257.582	265.933
CYP4V2	338.207	0.538224	0.103938	5.17832	2.23892e-07	3.76663e-06	276.524	285.271	264.509	383.154	439.279	380.502
ABCD4	537.302	0.41719	0.0807178	5.16851	2.35974e-07	3.96478e-06	476.067	443.865	460.938	610.099	608.151	624.692
ADCY6	817.684	-0.367374	0.0711074	-5.16646	2.38564e-07	4.00315e-06	938.967	850.824	975.448	697.537	710.756	732.57
CASTOR2	483.332	-0.442371	0.085642	-5.16535	2.39985e-07	4.02183e-06	565.203	542.613	562.501	435.224	399.733	394.718
TNRC18	1930.65	-0.27454	0.0531529	-5.1651	2.40308e-07	4.02208e-06	2251.7	2050.76	2040.18	1779.21	1671.61	1790.45
FOXO6	41.3532	-1.58814	0.307692	-5.16145	2.45039e-07	4.09601e-06	69.8907	60.8444	54.6876	22.5963	26.7202	13.3803
LOC788142	590.786	0.417723	0.0809655	5.15927	2.47913e-07	4.13875e-06	465.938	506.704	545.76	654.309	690.449	681.558
SLC35F2	790.316	-0.363367	0.0705169	-5.1529	2.56485e-07	4.27639e-06	921.748	884.738	859.376	673.958	736.407	665.669
SPARC	740.754	-0.360371	0.0700146	-5.14708	2.64566e-07	4.40549e-06	855.908	812.921	830.358	635.643	642.352	667.341
LURAP1L	60.6913	1.26332	0.246017	5.1351	2.81994e-07	4.68972e-06	43.5551	29.9235	33.4822	96.2797	82.2981	78.6091
ZFAND5	1791.44	0.275074	0.0535851	5.13341	2.84543e-07	4.7261e-06	1522.4	1715.61	1625	1907.91	2008.29	1969.41
CD320	1375.11	-0.283534	0.05531	-5.12627	2.95542e-07	4.90254e-06	1496.07	1517.12	1517.86	1284.06	1177.82	1257.75
LOC100141266	3498.69	0.269843	0.0526453	5.12568	2.9646e-07	4.91154e-06	3481.37	2962.42	3073.67	3959.26	3689.52	3825.92
RIMS3	102.361	0.940975	0.183827	5.1188	3.0749e-07	5.08781e-06	72.9295	67.8266	69.1965	131.648	149.633	122.931
AVPI1	398.085	-0.488374	0.0954426	-5.11694	3.10533e-07	5.13166e-06	498.351	437.88	458.706	344.839	314.229	334.507
HDAC1	3246.15	0.223811	0.0437664	5.11377	3.15799e-07	5.21208e-06	2875.65	3041.22	3071.43	3477.86	3383.84	3626.89
SIN3A	902.228	-0.344655	0.067431	-5.11122	3.20086e-07	5.27617e-06	963.277	1035.35	1031.25	832.132	746.027	805.326
TLE3	358.829	-0.50203	0.0982475	-5.10985	3.22406e-07	5.30771e-06	439.603	426.908	395.09	306.523	289.646	295.202
C11H2orf68	492.969	0.43036	0.0844406	5.0966	3.45803e-07	5.68572e-06	411.241	419.926	429.688	577.678	539.747	579.533
SRXN1	616.387	-0.383628	0.0753362	-5.09221	3.53915e-07	5.81177e-06	712.075	691.232	690.849	535.433	522.646	546.083
NAGA	1459.89	-0.270561	0.0531409	-5.0914	3.55436e-07	5.82941e-06	1633.82	1575.97	1579.24	1363.64	1295.39	1311.27
CDYL	658.362	0.399388	0.0784995	5.08777	3.62292e-07	5.9344e-06	571.281	590.49	540.179	699.502	806.949	741.769
LNPEP	1389.45	0.35643	0.0700719	5.08664	3.64465e-07	5.96253e-06	1160.79	1345.56	1147.32	1705.53	1531.6	1445.91
ITCH	1213.9	0.304592	0.0599086	5.08428	3.69025e-07	6.02957e-06	1116.23	1094.2	1045.76	1393.11	1363.8	1270.29
SAMD11	104.641	-0.912621	0.179648	-5.08005	3.77326e-07	6.15749e-06	131.678	127.674	150.67	74.6659	73.7476	69.4102
AMPD3	431.698	-0.463545	0.0912685	-5.07892	3.79585e-07	6.18662e-06	473.029	510.694	516.742	359.575	384.77	345.378
PARD6B	164.414	-0.762028	0.150163	-5.07467	3.88162e-07	6.31853e-06	203.595	225.424	191.965	138.525	101.537	125.44
TRPV4	610.567	-0.392136	0.0772889	-5.07363	3.90291e-07	6.34527e-06	700.933	722.153	655.135	517.749	539.747	527.685
TPRN	424.954	-0.452799	0.0892505	-5.07334	3.90885e-07	6.34703e-06	486.196	487.753	498.885	358.593	368.738	349.56
PLEKHF1	168.456	-0.754023	0.148653	-5.07238	3.92871e-07	6.37135e-06	189.414	207.469	238.84	129.683	109.018	136.312
CNP	1289.92	0.294175	0.0580049	5.07155	3.94584e-07	6.38326e-06	1110.15	1152.05	1215.4	1367.57	1456.78	1437.54
ATP10A	1581.98	0.271947	0.0536199	5.07176	3.94159e-07	6.38326e-06	1449.47	1427.35	1424.11	1810.65	1641.69	1738.6
GNAQ	383.366	0.598483	0.118048	5.06985	3.98139e-07	6.4328e-06	323.118	318.186	273.438	550.17	383.701	451.584
WDR60	594.585	0.399077	0.0787364	5.06852	4.00931e-07	6.4699e-06	525.7	532.638	478.795	676.905	693.655	659.815
LOC524181	17.9649	2.67184	0.527204	5.06794	4.02141e-07	6.47619e-06	7.09037	1.9949	5.58037	35.3681	30.9954	26.7606
KIAA0513	338.939	-0.512232	0.101075	-5.06786	4.02312e-07	6.47619e-06	391.996	393.993	410.715	268.208	269.339	299.384
SPRY2	741.155	0.355935	0.0704338	5.05346	4.33868e-07	6.97555e-06	656.365	671.283	621.653	841.956	841.15	814.524
HBEGF	193.16	-0.671707	0.132941	-5.05268	4.35645e-07	6.9955e-06	246.137	247.367	218.75	142.455	145.358	158.891
NUDT4	3595.35	0.237777	0.0470838	5.05009	4.41612e-07	7.08261e-06	3318.29	3447.19	3128.35	3893.43	4086.05	3698.81
ELK3	1732.69	0.285619	0.0566111	5.04527	4.52876e-07	7.25435e-06	1631.8	1616.87	1433.04	1950.16	1934.54	1829.75
SCFD2	711.858	0.35538	0.0704426	5.04496	4.53618e-07	7.25732e-06	616.862	636.373	620.537	796.764	799.467	801.144
PLEKHB2	890.966	0.334819	0.0664126	5.0415	4.61886e-07	7.38056e-06	781.966	832.87	748.885	979.499	986.508	1016.06
HOMEZ	333.426	0.521318	0.103477	5.03799	4.70435e-07	7.50798e-06	271.46	299.235	250	387.084	399.733	393.046
RAB11FIP5	1723.81	-0.256751	0.0510178	-5.03259	4.83896e-07	7.71338e-06	1943.77	1806.38	1881.7	1579.77	1534.81	1596.43
LIF	599.43	-0.413072	0.0822379	-5.0229	5.0898e-07	8.09347e-06	644.21	688.24	720.983	478.451	557.917	506.778
SLC6A6	728.864	-0.373525	0.0743639	-5.02293	5.08885e-07	8.09347e-06	831.599	811.924	824.778	692.625	594.256	618.002
IRS1	786.496	0.360967	0.0719291	5.01837	5.2112e-07	8.27642e-06	714.101	708.189	643.974	882.237	842.219	928.257
PFKFB3	524.114	0.409111	0.0815558	5.01634	5.26663e-07	8.3543e-06	451.758	435.885	463.17	602.24	607.082	584.551
STRADB	544.015	0.411342	0.0821218	5.00893	5.47343e-07	8.6718e-06	489.235	450.847	459.822	637.608	637.008	589.569
POLB	350.782	0.497519	0.0993343	5.00854	5.48459e-07	8.67894e-06	275.511	310.207	286.831	401.821	414.697	415.625
CYR61	9523.72	-0.20535	0.0410316	-5.0047	5.59503e-07	8.84299e-06	9944.74	9737.1	10923	8627.84	8925.6	8984.02
ITGB1	18841.1	0.166623	0.033295	5.00443	5.60264e-07	8.84431e-06	17084.7	18308.2	17868.3	20431.9	19874.4	19479.2
SETD1B	448.065	-0.475326	0.0950696	-4.99977	5.74e-07	9.05021e-06	562.165	503.712	498.885	399.856	332.399	391.373
NUP160	1780.65	0.250801	0.0502529	4.99079	6.01336e-07	9.46977e-06	1597.36	1699.65	1580.36	1960.96	1931.33	1914.22
HOXD9	656.033	-0.379768	0.0761333	-4.9882	6.09458e-07	9.58611e-06	788.043	726.143	712.055	555.082	561.123	593.75
MAP2K6	111.873	0.892198	0.179006	4.98419	6.22215e-07	9.7642e-06	70.9037	79.796	84.8216	160.139	125.05	150.528
HABP4	1376.11	-0.271933	0.0545592	-4.98417	6.22276e-07	9.7642e-06	1515.31	1525.1	1475.45	1292.9	1215.23	1232.66
LHFPL6	608.771	0.400326	0.0803295	4.98355	6.24284e-07	9.78394e-06	533.803	551.59	488.84	728.975	651.972	697.447
GEM	281.413	0.565155	0.113437	4.98211	6.28947e-07	9.84521e-06	226.892	249.362	204.241	318.313	340.949	348.724
KLF5	458.129	0.441102	0.0886998	4.97298	6.59326e-07	1.03084e-05	390.983	389.005	386.161	490.241	542.953	549.428
FAM241A	100.344	0.944816	0.190099	4.97012	6.69101e-07	1.04487e-05	69.8907	73.8113	61.384	133.613	149.633	113.732
CCDC51	444.842	-0.443344	0.0893455	-4.96213	6.97227e-07	1.08749e-05	546.971	487.753	503.349	380.207	371.945	378.829
DLGAP4	1161.8	-0.327399	0.0660741	-4.95502	7.23225e-07	1.12535e-05	1380.6	1193.95	1304.69	1097.39	993.99	1000.18
RAB31	2199.35	0.226641	0.0457378	4.95522	7.22497e-07	1.12535e-05	1968.08	2087.66	2024.56	2366.71	2386.64	2362.46
MCIDAS	270.73	0.560267	0.113188	4.94988	7.42576e-07	1.15409e-05	232.969	222.431	200.893	313.4	318.504	336.18
LOC785873	707.949	0.364676	0.073683	4.94926	7.44965e-07	1.15642e-05	635.094	583.508	638.394	764.343	829.394	796.963
RIC1	360.407	0.488445	0.0987116	4.9482	7.49039e-07	1.16137e-05	287.666	325.169	286.831	417.54	417.903	427.333
ADGRG1	6118.5	-0.190711	0.0385509	-4.94699	7.53711e-07	1.16722e-05	6717.61	6334.8	6514.52	5965.41	5563.14	5615.54
RASAL1	915.658	-0.327249	0.0663048	-4.93552	7.99364e-07	1.23646e-05	1015.95	1035.35	1007.81	833.114	754.577	847.139
GINS2	679.917	0.3674	0.0744995	4.93158	8.15671e-07	1.26019e-05	598.629	620.414	562.501	773.185	735.339	789.436
WSB2	2576.57	0.218276	0.0442715	4.93041	8.20586e-07	1.26628e-05	2374.26	2381.91	2387.28	2763.62	2872.95	2679.4
SCN3B	4584.06	-0.184872	0.0375239	-4.92677	8.36015e-07	1.28857e-05	4791.06	4949.34	4895.1	4284.45	4174.76	4409.64
TRAF3IP2	850.265	0.329179	0.067065	4.90835	9.18469e-07	1.41399e-05	773.863	753.074	734.376	906.798	953.375	980.105
COL24A1	1040.29	0.308919	0.062967	4.90604	9.29353e-07	1.42906e-05	891.36	976.503	920.76	1179.92	1104.08	1169.1
CAST	2863.9	0.214746	0.0437744	4.90575	9.30697e-07	1.42944e-05	2617.36	2770.91	2562.5	3073.09	3123.05	3036.49
LOC107131209	22.1333	2.19286	0.44723	4.90321	9.42827e-07	1.44637e-05	10.1291	5.9847	7.81251	42.2452	25.6513	40.9771
RPS6KC1	694.795	0.357299	0.0729256	4.8995	9.608e-07	1.47221e-05	594.578	632.383	599.331	779.08	809.086	754.313
USP33	526.495	0.410612	0.0838275	4.8983	9.6669e-07	1.4795e-05	439.603	468.801	446.429	615.011	626.32	562.808
CENPE	1789.14	0.281355	0.0575954	4.88502	1.03418e-06	1.58094e-05	1514.3	1762.49	1566.97	2020.89	1967.67	1902.51
LRCH1	418.155	0.463825	0.094959	4.88448	1.03703e-06	1.58344e-05	320.079	379.031	356.027	465.68	478.825	509.287
CSTF1	752.784	0.363015	0.0743734	4.88098	1.05558e-06	1.60954e-05	601.668	707.192	667.412	864.553	818.705	857.174
2021-09-07	3192.33	0.228413	0.0467982	4.8808	1.05659e-06	1.60954e-05	2906.04	3117.03	2793.53	3539.75	3476.83	3320.82
PIM2	141.83	-0.777836	0.159443	-4.87846	1.06916e-06	1.62679e-05	191.44	153.607	193.081	96.2797	103.674	112.896
SESN2	338.144	-0.50906	0.104438	-4.87429	1.09201e-06	1.65962e-05	397.06	386.013	409.599	248.559	283.234	304.401
CDON	631.65	0.369331	0.0757918	4.87296	1.09937e-06	1.66887e-05	576.345	555.579	521.206	717.186	705.412	714.172
SRD5A3	78.3953	1.06251	0.218168	4.87012	1.11531e-06	1.6911e-05	45.5809	60.8444	45.759	122.806	90.8485	104.533
TFAP2B	819.318	-0.328881	0.0675645	-4.86766	1.12925e-06	1.71025e-05	919.722	923.638	891.742	741.747	744.958	694.102
PHF23	634.266	-0.387147	0.0796228	-4.86226	1.16055e-06	1.75562e-05	760.695	717.166	679.688	518.732	539.747	589.569
RCN1	5601.99	0.172308	0.0355128	4.852	1.2222e-06	1.84615e-05	5228.64	5370.27	5200.9	5929.06	6079.37	5803.7
USP15	1596.71	0.265329	0.0546863	4.85184	1.22322e-06	1.84615e-05	1463.65	1501.16	1382.81	1789.03	1782.77	1660.83
CACNA2D1	629.482	0.39676	0.0818467	4.8476	1.24964e-06	1.88384e-05	584.449	559.569	484.376	739.782	724.651	684.067
CSGALNACT1	171.774	0.697978	0.144111	4.84334	1.27673e-06	1.92246e-05	115.472	138.645	139.509	196.489	210.555	229.974
DNAJC13	1358.08	0.276565	0.0571288	4.84107	1.29141e-06	1.94233e-05	1177	1274.74	1233.26	1554.23	1440.75	1468.49
RAB30	165.198	0.743928	0.153776	4.83774	1.31325e-06	1.97289e-05	119.523	149.617	100.447	218.103	209.486	194.014
LOC100299712	286.935	0.523653	0.108251	4.83742	1.31536e-06	1.97379e-05	239.047	242.38	224.331	347.786	337.743	330.326
PMEPA1	15660.1	-0.141532	0.0292877	-4.83248	1.34846e-06	2.02114e-05	16706.9	16414	16159.6	14665	15129	14886.4
CDK12	1199.95	0.302069	0.0625164	4.83183	1.35285e-06	2.0254e-05	986.574	1130.11	1107.14	1353.81	1339.21	1282.83
C22H3orf14	327.685	0.496023	0.102663	4.83159	1.3545e-06	2.02555e-05	273.486	261.332	281.25	361.54	395.458	393.046
CD164	3657.9	0.265695	0.0550087	4.83006	1.36491e-06	2.03877e-05	3379.07	3456.16	3125	3967.12	4352.18	3667.87
POU3F3	700.074	-0.355537	0.0736284	-4.8288	1.37358e-06	2.04938e-05	813.366	778.011	764.51	600.275	653.041	591.241
ANKRD50	870.807	-0.324441	0.0672267	-4.82607	1.3925e-06	2.07524e-05	979.483	1002.44	920.76	777.115	801.605	743.442
PER1	80.2616	-0.986332	0.20443	-4.82478	1.40156e-06	2.08636e-05	99.2651	112.712	108.259	49.1223	54.5091	57.7025
SRGAP1	2382.96	0.236222	0.0489767	4.82314	1.41312e-06	2.10117e-05	2062.28	2184.41	2319.2	2619.2	2585.44	2527.2
GAL3ST3	135.562	-0.771369	0.160174	-4.81581	1.46601e-06	2.17734e-05	188.401	157.597	166.295	107.087	103.674	90.3169
H1FX	5505.52	-0.183574	0.0381366	-4.81358	1.48249e-06	2.1993e-05	6094.68	5643.57	5828.13	5046.83	5208.29	5211.62
NAPEPLD	361.84	0.472941	0.0982575	4.81328	1.48475e-06	2.20016e-05	308.937	284.273	315.849	430.311	428.591	403.081
BOLA-DQA5	50.1515	1.3499	0.280672	4.80952	1.5129e-06	2.23933e-05	21.2711	39.898	23.4375	62.8766	74.8164	78.6091
MPZL1	4981.16	-0.170251	0.035433	-4.80488	1.54845e-06	2.28936e-05	5283.34	5330.37	5207.6	4646.97	4788.25	4630.41
TNKS	748.145	0.350121	0.0729134	4.80187	1.5719e-06	2.32139e-05	641.172	657.319	674.108	890.096	840.082	786.091
SPAG9	1450.42	0.253787	0.0528898	4.79841	1.59928e-06	2.35917e-05	1289.43	1324.61	1356.03	1601.39	1564.73	1566.33
PTPN12	957.295	0.299728	0.0624972	4.79586	1.61982e-06	2.38676e-05	830.586	873.766	870.537	1043.36	1063.46	1062.06
NCOA7	163.265	0.686456	0.143432	4.78594	1.70193e-06	2.50492e-05	134.717	117.699	122.768	196.489	210.555	197.359
PPARG	659.988	-0.350636	0.0732718	-4.78542	1.70632e-06	2.50855e-05	754.617	731.13	733.26	598.31	573.949	568.662
GTF2IRD2	548.479	0.392095	0.0819729	4.78323	1.72499e-06	2.53316e-05	469.99	474.786	479.911	613.046	589.981	663.16
KDM3A	791.246	0.335477	0.0702546	4.77516	1.79563e-06	2.63393e-05	667.507	722.153	708.706	924.482	877.49	847.139
LOC101907033	29.6676	1.71054	0.358365	4.77319	1.81332e-06	2.65689e-05	16.2065	11.9694	13.3929	50.1048	47.0275	39.3046
IL10RB	621.461	0.358607	0.0751473	4.77205	1.8236e-06	2.66895e-05	539.881	551.59	542.412	679.853	707.55	707.482
SMAD3	951.893	-0.296754	0.0622379	-4.76805	1.86017e-06	2.71943e-05	1058.49	1064.28	1025.67	849.816	847.563	865.537
SCIN	2199.93	0.21737	0.0456162	4.7652	1.88669e-06	2.75511e-05	1981.25	2056.74	2066.97	2390.29	2319.31	2385.03
GNPTAB	902.354	0.37212	0.0781011	4.7646	1.89229e-06	2.76021e-05	803.237	781.003	774.555	1160.27	965.132	929.929
RRAD	17.565	-2.39001	0.50213	-4.75973	1.93848e-06	2.82442e-05	29.3744	24.9362	34.5983	4.91223	3.20642	8.36267
CEBPG	705.771	0.340048	0.0714839	4.75698	1.96507e-06	2.85998e-05	625.978	622.408	620.537	758.449	806.949	800.308
RHBDF2	222.556	0.626175	0.131719	4.75387	1.99556e-06	2.90111e-05	200.556	159.592	165.179	244.629	269.339	296.039
MYOF	3731.13	0.227824	0.0479378	4.75249	2.00922e-06	2.91773e-05	3237.26	3528.98	3546.88	4260.87	3826.33	3986.49
YWHAG	2609.29	0.205025	0.0431826	4.74787	2.05569e-06	2.98189e-05	2412.75	2471.68	2387.28	2864.81	2755.38	2763.86
TATDN3	385.753	0.450873	0.0950444	4.74381	2.09733e-06	3.03892e-05	321.092	327.163	330.358	423.434	442.486	469.982
SLC25A15	1087.15	-0.286638	0.0604776	-4.73957	2.14169e-06	3.09975e-05	1161.81	1252.8	1169.64	966.727	980.095	991.813
NTN4	3914.66	-0.195004	0.0411734	-4.73618	2.17785e-06	3.14859e-05	4157.99	4338.91	4036.84	3761.79	3623.25	3569.19
LOC616948	294.031	0.523093	0.110504	4.73372	2.20442e-06	3.18349e-05	258.292	228.416	237.724	323.225	345.224	371.303
F2RL2	1329.03	0.26394	0.0557731	4.73239	2.21896e-06	3.20094e-05	1208.4	1220.88	1191.97	1440.27	1510.22	1402.42
TTBK2	308.26	0.503694	0.106476	4.7306	2.23857e-06	3.22567e-05	257.279	267.316	239.956	384.136	346.293	354.577
CELF4	56.4359	-1.16444	0.246217	-4.72932	2.25278e-06	3.24257e-05	71.9166	78.7985	83.7055	30.4558	35.2706	38.4683
STAT5B	912.613	-0.304644	0.0644551	-4.72646	2.28469e-06	3.28487e-05	1040.26	1006.43	979.912	816.413	793.054	839.613
ABCE1	2296.35	0.217712	0.0460764	4.72502	2.30097e-06	3.30464e-05	2070.39	2205.36	2092.64	2503.27	2487.11	2419.32
MTMR12	575.416	0.409572	0.0866936	4.72436	2.30842e-06	3.31169e-05	447.706	538.623	496.653	706.379	616.701	646.435
SIPA1L3	1409.93	0.282172	0.0597509	4.72247	2.33003e-06	3.33902e-05	1331.98	1161.03	1324.78	1548.34	1576.49	1516.99
AKAP12	2629.43	-0.209119	0.0443107	-4.71938	2.36567e-06	3.38638e-05	2751.06	2854.7	2852.68	2530.78	2404.81	2382.53
CDC25A	731.371	-0.342671	0.0727334	-4.71133	2.4611e-06	3.51528e-05	780.953	866.784	805.805	619.924	654.109	660.651
ING2	270.531	0.537	0.113976	4.71153	2.4586e-06	3.51528e-05	234.995	213.454	213.17	303.576	345.224	312.764
ESM1	865.648	0.317222	0.0673687	4.70875	2.4924e-06	3.5561e-05	773.863	803.944	733.26	930.377	998.265	954.181
TPBG	232.83	-0.573587	0.121857	-4.70704	2.51335e-06	3.58208e-05	284.628	261.332	289.063	199.437	190.247	172.271
ROCK2	1908.01	0.23971	0.0509605	4.70384	2.55313e-06	3.6348e-05	1704.73	1821.34	1723.22	2158.43	1996.53	2043.84
AEN	1315.46	0.26458	0.0564003	4.69111	2.71731e-06	3.86432e-05	1178.01	1185.97	1223.22	1378.37	1438.61	1488.56
SLC25A36	521.233	0.409188	0.087242	4.69027	2.72849e-06	3.87179e-05	429.474	490.745	421.876	626.801	593.187	565.317
ATM	343.273	0.503515	0.107352	4.6903	2.72802e-06	3.87179e-05	287.666	307.214	256.697	441.118	365.532	401.408
UBXN7	625.577	0.401946	0.085791	4.68517	2.79722e-06	3.96501e-05	517.597	612.434	485.492	745.677	698.999	693.266
PPARG-TSEN2	668.752	-0.338016	0.0723242	-4.67363	2.95929e-06	4.18565e-05	739.424	746.092	754.465	600.275	591.05	581.206
MOV10	1380.43	0.251124	0.0537321	4.67363	2.95916e-06	4.18565e-05	1281.33	1223.87	1276.79	1497.25	1508.09	1495.25
C24H18orf54	231.825	0.582302	0.124627	4.67235	2.97774e-06	4.20718e-05	190.427	165.577	200.893	274.103	298.197	261.752
TTC23	75.0923	1.03235	0.221132	4.66849	3.03426e-06	4.28241e-05	55.71	39.898	52.4554	116.911	91.9173	93.662
NARS	4961.91	0.174138	0.0373118	4.66711	3.05465e-06	4.30653e-05	4569.23	4815.69	4600.45	5242.33	5373.96	5169.81
PELI1	354.918	0.457831	0.098136	4.66527	3.08214e-06	4.34059e-05	289.692	307.214	300.224	429.329	400.802	402.245
CLIC4	1806.07	0.275119	0.0590391	4.65995	3.16284e-06	4.44945e-05	1598.37	1638.81	1666.3	2177.1	1853.31	1902.51
C8H9orf72	203.233	0.606011	0.130093	4.65831	3.18823e-06	4.48034e-05	159.027	168.569	156.25	255.436	223.38	256.734
CHP1	1732.55	0.235063	0.0504798	4.65657	3.21528e-06	4.51349e-05	1566.97	1657.76	1549.11	1903	1866.14	1852.33
FAM129B	6128.31	-0.166791	0.0358268	-4.65549	3.23207e-06	4.53219e-05	6609.23	6259.99	6578.13	5889.77	5708.49	5724.25
CEP162	342.8	0.463714	0.0996284	4.65444	3.24867e-06	4.55058e-05	292.731	290.258	281.25	416.557	387.977	388.028
ZBTB18	581.728	-0.380503	0.0818042	-4.65139	3.2971e-06	4.61346e-05	681.688	628.393	664.063	462.732	533.334	520.158
CYLD	377.168	0.442732	0.0952725	4.64701	3.36787e-06	4.70744e-05	331.221	319.184	308.036	440.136	444.623	419.806
PIAS2	1270.88	0.261009	0.0561791	4.64601	3.38414e-06	4.72512e-05	1184.09	1149.06	1136.16	1408.83	1341.35	1405.77
RNF31	454.753	0.405098	0.0873098	4.63978	3.48787e-06	4.86476e-05	401.112	393.993	378.349	537.398	510.889	506.778
PGRMC2	2104.36	-0.262513	0.0566534	-4.63366	3.59258e-06	5.00012e-05	2401.61	2374.93	2104.91	1879.42	2029.66	1835.61
PLEKHA2	1918.56	-0.251163	0.0542033	-4.63373	3.59136e-06	5.00012e-05	2116.98	2191.4	1943.08	1754.65	1820.18	1685.08
SGK3	491.849	0.393729	0.0850782	4.62785	3.6948e-06	5.13692e-05	412.254	452.842	409.599	553.117	569.674	553.609
MASP1	11.3188	3.93333	0.850595	4.62421	3.76025e-06	5.22235e-05	3.03873	0	1.11607	21.6138	24.5825	17.5616
VAV3	1218.41	-0.262843	0.0568721	-4.62165	3.80704e-06	5.28171e-05	1305.64	1345.56	1337.06	1135.71	1070.94	1115.58
NUDT7	320.467	0.521436	0.112986	4.61506	3.92981e-06	5.44625e-05	223.853	288.263	277.902	406.733	350.568	375.484
USP42	357.14	0.45724	0.0992041	4.60908	4.04456e-06	5.59933e-05	305.899	315.194	281.25	434.241	404.009	402.245
SLC10A6	84.2895	0.967295	0.209958	4.60709	4.08349e-06	5.64724e-05	52.6713	48.875	70.3126	120.841	95.1237	117.914
CA2	1833.47	-0.223343	0.0485428	-4.60094	4.20582e-06	5.81026e-05	1971.12	2009.86	1944.2	1735	1655.58	1685.08
RBFA	655.602	0.348256	0.0757221	4.59913	4.2425e-06	5.85474e-05	570.268	545.605	616.072	742.729	717.169	741.769
HOXB8	437.124	-0.413577	0.0899595	-4.59736	4.2787e-06	5.89847e-05	512.532	487.753	496.653	363.505	401.871	360.431
GNB4	367.547	0.54119	0.117878	4.59111	4.40894e-06	6.07159e-05	306.912	326.166	264.509	518.732	378.357	410.607
SVIL	562.852	0.35939	0.0783243	4.58849	4.46468e-06	6.14188e-05	494.3	496.73	487.724	634.66	642.352	621.347
UHRF2	320.961	0.47499	0.103552	4.58697	4.49724e-06	6.18016e-05	279.563	262.329	264.509	367.435	358.05	393.882
FFAR4	37.0065	1.41798	0.30924	4.58539	4.5315e-06	6.22068e-05	19.2453	18.9515	22.3215	55.9994	54.5091	51.0123
KLHL21	745.905	0.34919	0.076192	4.58303	4.58284e-06	6.28455e-05	689.791	584.505	695.314	824.272	829.394	852.157
TFAP4	190.079	-0.60422	0.132	-4.57741	4.70773e-06	6.44905e-05	239.047	220.436	228.795	143.437	150.702	158.055
IL17RC	343.987	0.472992	0.10349	4.57041	4.86771e-06	6.66121e-05	278.55	290.258	296.875	385.119	374.082	439.04
IQGAP1	12580.9	0.185703	0.0406784	4.56516	4.99117e-06	6.823e-05	11169.4	12356.4	11791.3	14049	12928.3	13191.3
MAZ	2868.82	-0.21021	0.0460745	-4.56239	5.05737e-06	6.90627e-05	3237.26	2934.5	3059.16	2617.24	2737.21	2627.55
ASXL2	1100.5	0.29351	0.06455	4.54703	5.4409e-06	7.42226e-05	948.083	1035.35	982.144	1295.85	1191.72	1149.87
AMMECR1	126.591	0.75795	0.166749	4.54544	5.48194e-06	7.47043e-05	85.0844	108.722	88.1698	171.928	151.77	153.873
C1H3orf70	374.827	0.46215	0.101737	4.54261	5.55614e-06	7.56365e-05	302.86	318.186	323.661	454.873	463.862	385.519
CXCL16	462.98	0.402458	0.088648	4.53995	5.62668e-06	7.6517e-05	386.931	377.036	433.036	533.468	532.265	515.141
USP34	1712.94	0.244542	0.053916	4.53561	5.74365e-06	7.80264e-05	1522.4	1610.88	1571.43	1968.82	1771.01	1833.1
NRG1	186.343	0.606308	0.133844	4.52997	5.89907e-06	8.00545e-05	153.962	149.617	139.509	235.787	215.899	223.283
WTAP	1163.53	0.259273	0.0572926	4.52542	6.02744e-06	8.17116e-05	1072.67	1042.33	1062.5	1287.99	1265.47	1250.22
RUNX2	219.494	0.576637	0.127457	4.52415	6.06374e-06	8.21184e-05	158.014	176.549	194.197	249.541	281.096	257.57
CRIP1	1414.76	-0.272896	0.0603408	-4.52258	6.10895e-06	8.26449e-05	1582.16	1561.01	1504.47	1238.86	1208.82	1393.22
TTC39C	144.083	0.708997	0.156907	4.51859	6.2252e-06	8.41305e-05	98.2522	125.679	103.795	192.559	175.284	168.926
POU2F1	692.947	0.380362	0.0841916	4.51781	6.2483e-06	8.43553e-05	523.674	683.253	599.331	777.115	782.366	791.945
KIF18A	345.314	0.460182	0.101933	4.51454	6.34538e-06	8.55774e-05	274.498	303.225	293.527	392.979	429.66	377.993
C21H15orf39	1186.11	-0.2815	0.0623676	-4.51356	6.37485e-06	8.58861e-05	1359.32	1195.94	1349.33	1076.76	1081.63	1053.7
MAP3K21	469.493	-0.430913	0.0954793	-4.51316	6.38693e-06	8.59602e-05	559.126	570.541	485.492	435.224	406.146	360.431
NCOR2	5711.44	-0.186554	0.041363	-4.51017	6.47756e-06	8.70005e-05	6361.07	5691.45	6189.74	5332.72	5317.31	5376.36
NFATC3	619.05	-0.345284	0.0765556	-4.51025	6.47523e-06	8.70005e-05	677.636	680.261	719.867	559.994	554.71	521.831
VPS36	1853.16	0.236459	0.0524464	4.50858	6.52622e-06	8.7564e-05	1686.49	1794.41	1621.65	2078.86	1989.05	1948.5
TBC1D9	350.559	0.465488	0.103368	4.5032	6.69387e-06	8.97212e-05	268.421	327.163	287.947	421.469	386.908	411.444
PPP1R3B	172.255	-0.621855	0.138102	-4.50285	6.70472e-06	8.97745e-05	209.672	214.452	202.009	128.7	143.22	135.475
TMEM30B	305.949	0.482626	0.107197	4.50222	6.72487e-06	8.9952e-05	274.498	250.36	241.072	342.874	350.568	376.32
LTBP1	1453.26	0.270093	0.0600314	4.4992	6.82091e-06	9.11432e-05	1256.01	1376.48	1320.31	1709.46	1510.22	1547.09
DHX58	22.2985	1.91185	0.425404	4.4942	6.98319e-06	9.32163e-05	7.09037	11.9694	8.92858	41.2627	35.2706	29.2694
DENND4C	753.926	0.378301	0.0842291	4.49133	7.07791e-06	9.43842e-05	573.307	739.11	654.019	912.693	824.049	820.378
LOC100848077	108.922	0.808963	0.180296	4.48686	7.2281e-06	9.62886e-05	73.9424	81.7909	81.4733	157.191	137.876	121.259
TMX3	1983.62	0.222737	0.0496932	4.48225	7.38618e-06	9.82941e-05	1839.44	1885.18	1764.51	2185.94	2176.09	2050.53
LOC112448832	357.519	0.443338	0.0990746	4.47479	7.64875e-06	0.000101685	300.834	295.245	312.5	397.891	441.417	397.227
ZDHHC9	743.035	-0.314144	0.0702236	-4.47348	7.69566e-06	0.000102204	838.689	804.942	828.126	682.8	633.802	669.85
KIAA1522	811.327	-0.308518	0.0689945	-4.47163	7.76245e-06	0.000102987	877.18	914.661	901.787	768.273	689.38	716.681
SAPCD2	714.664	-0.333104	0.0745579	-4.46771	7.90601e-06	0.000104785	826.534	795.965	765.626	615.011	681.898	602.949
USP32	700.859	0.368143	0.0824629	4.46435	8.03117e-06	0.000106336	597.617	645.35	591.519	886.167	757.784	726.716
VPS9D1	56.0044	1.11477	0.249812	4.46243	8.1037e-06	0.000107187	30.3873	36.9056	39.0626	67.7888	79.0917	82.7905
PAOX	385.113	0.422667	0.0947351	4.46156	8.13649e-06	0.000107512	334.26	325.169	328.125	416.557	449.967	456.602
LOC112447294	11.6241	3.35808	0.75313	4.45884	8.24047e-06	0.000108776	3.03873	0.997449	2.23215	21.6138	11.7569	30.1056
PDS5A	2196.02	0.231028	0.0518175	4.45849	8.25387e-06	0.000108843	2071.4	2080.68	1907.37	2509.17	2308.62	2298.9
ANKRD44	230.827	0.545055	0.122295	4.45689	8.31567e-06	0.000109547	190.427	191.51	180.804	297.681	266.133	258.407
CD59	845.227	-0.297804	0.066981	-4.4461	8.74447e-06	0.00011508	964.29	914.661	916.296	783.992	762.059	730.061
SLC25A28	204.474	0.595729	0.134004	4.44562	8.764e-06	0.000115221	177.259	144.63	167.411	226.945	240.481	270.114
CDKN2C	1216.07	-0.261528	0.0588377	-4.44491	8.79297e-06	0.000115485	1374.52	1291.7	1310.27	1151.43	1107.28	1061.22
PJA2	897.461	0.327073	0.0736078	4.44345	8.85268e-06	0.000116152	789.056	821.898	777.903	1101.32	905.279	989.304
NUAK2	778.429	0.35018	0.0788253	4.44248	8.89274e-06	0.000116561	750.566	632.383	671.876	831.15	837.944	946.655
UBE2H	846.7	-0.304077	0.0684849	-4.44006	8.99353e-06	0.000117764	918.709	913.664	973.216	781.045	780.228	713.336
MASTL	242.378	0.543931	0.122557	4.43819	9.07172e-06	0.000118669	193.466	224.426	172.991	283.927	291.784	287.676
PLBD2	5824.06	-0.159115	0.0358627	-4.43679	9.13082e-06	0.000119322	6314.48	6023.6	6099.34	5499.73	5382.51	5624.73
IL12A	10.7035	3.49541	0.788742	4.43163	9.3525e-06	0.000122097	2.02582	0.997449	2.23215	20.6314	22.4449	15.8891
TNFSF15	85.0123	-0.942972	0.212801	-4.43123	9.36973e-06	0.0001222	101.291	105.73	128.348	74.6659	52.3715	47.6672
RDH11	491.363	0.379305	0.0856035	4.43095	9.38198e-06	0.000122237	396.048	442.868	443.081	547.223	553.642	565.317
IGFBP2	16594.2	-0.174894	0.0395515	-4.42192	9.78272e-06	0.000127331	18707.4	16667.4	17423	15957.9	15122.5	15686.7
GSK3B	2159.3	0.21973	0.0497079	4.42042	9.85081e-06	0.00012809	1942.76	2083.67	1956.48	2410.92	2337.48	2224.47
PANX1	1508.09	0.278998	0.0632154	4.41345	1.01735e-05	0.000132154	1232.71	1399.42	1455.36	1697.67	1707.95	1555.46
NCEH1	288.485	0.493196	0.111818	4.41069	1.03044e-05	0.000133721	241.072	259.337	217.634	359.575	331.33	321.963
AKAP7	50.1285	1.18598	0.268948	4.40969	1.03517e-05	0.000134202	31.4002	37.9031	22.3215	69.7537	64.1284	75.2641
CCNL1	652.71	0.337502	0.0765497	4.40893	1.03883e-05	0.000134543	605.72	577.523	546.876	693.607	733.201	759.331
PYGO2	731.203	-0.311707	0.0707167	-4.40782	1.04417e-05	0.000135101	824.508	792.972	813.617	643.502	632.733	679.885
NRIP1	1923.91	0.283269	0.0643007	4.40537	1.05604e-05	0.000136501	1649.02	1884.18	1671.88	2330.36	2028.59	1979.45
RTN4R	21.7189	1.94141	0.440997	4.40232	1.07102e-05	0.000138163	7.09037	9.97449	10.0447	35.3681	23.5137	44.3222
MET	2630.22	0.224313	0.0509523	4.40241	1.07054e-05	0.000138163	2290.19	2606.34	2380.58	2948.32	2785.31	2770.55
ZFC3H1	660.375	0.330375	0.0750521	4.40194	1.07287e-05	0.000138266	618.888	570.541	564.733	728.975	759.921	719.19
MAP4K5	532.89	0.366035	0.0832641	4.39607	1.10229e-05	0.000141914	435.551	482.766	478.795	628.766	583.568	587.896
CAPRIN1	6509.86	0.156665	0.0356392	4.39586	1.10335e-05	0.000141914	6102.78	6349.76	6014.52	7020.56	6852.12	6719.41
RNF141	460.046	0.399858	0.0909798	4.39502	1.10761e-05	0.000142321	376.802	431.896	380.581	495.153	551.504	524.34
EREG	154.707	0.662133	0.150706	4.39354	1.11519e-05	0.000143155	135.73	121.689	101.563	194.524	184.903	189.833
DCSTAMP	11.5008	3.07326	0.699597	4.3929	1.11848e-05	0.000143436	3.03873	0.997449	3.34822	21.6138	22.4449	17.5616
POLE3	2753.26	-0.198522	0.0452083	-4.39127	1.12691e-05	0.000144375	2900.97	3062.17	2860.5	2616.25	2606.82	2472.84
GJA1	43.7508	1.26034	0.287116	4.38966	1.13527e-05	0.000145304	26.3356	22.9413	27.9018	64.8415	69.4724	51.0123
GGT6	46.401	1.20325	0.274562	4.38243	1.17365e-05	0.000150068	25.3227	26.9311	32.3661	65.8239	57.7155	70.2465
NOD1	231.463	0.528197	0.12079	4.37287	1.22625e-05	0.000156641	195.492	179.541	194.197	280.98	257.582	280.986
TRIM36	311.709	0.473866	0.108445	4.36964	1.24449e-05	0.000158815	252.214	265.322	264.509	389.049	373.013	326.144
NEURL3	33.356	1.47936	0.338908	4.36509	1.27071e-05	0.000162003	25.3227	14.9617	12.2768	48.1399	53.4403	45.9947
SLC7A6	274.503	-0.479159	0.109809	-4.36355	1.27971e-05	0.000162991	316.028	322.176	321.429	223.998	223.38	240.009
PDXP	170.55	-0.620526	0.142274	-4.3615	1.29173e-05	0.000164362	224.866	191.51	204.241	139.507	121.844	141.329
CCDC120	283.636	0.496837	0.11394	4.3605	1.29767e-05	0.000164957	253.227	212.457	239.956	309.471	358.05	328.653
ABI1	1007.94	0.268531	0.0616256	4.35746	1.31581e-05	0.0001671	903.515	895.71	944.198	1128.83	1096.6	1078.78
PRKCI	1478.59	0.246133	0.0565042	4.35601	1.32455e-05	0.000168046	1329.95	1444.31	1282.37	1643.63	1588.25	1583.05
FOXC1	377.554	-0.416469	0.0956367	-4.3547	1.33248e-05	0.000168888	431.499	453.84	409.599	331.084	313.16	326.144
EIF5	6728.38	0.171768	0.0394903	4.34963	1.36366e-05	0.000172673	6305.36	6615.08	6059.16	7069.68	7383.31	6937.67
TMOD3	1268.86	0.262892	0.0604832	4.34654	1.38303e-05	0.000174957	1148.64	1162.03	1149.56	1493.32	1327.46	1332.17
WDR24	457.357	0.391389	0.0900796	4.34493	1.39319e-05	0.000176071	420.357	402.97	362.724	497.118	540.816	520.158
ABO	23.8521	1.71693	0.39634	4.33197	1.47784e-05	0.000186588	9.11618	10.9719	13.3929	37.333	36.3394	35.9595
BOLA-NC1	899.031	0.748097	0.172805	4.32914	1.49691e-05	0.000188813	584.449	818.906	609.376	1015.85	1190.65	1174.96
KCTD3	1602.98	0.220037	0.0508402	4.328	1.50467e-05	0.000189609	1454.54	1480.22	1508.93	1760.54	1695.13	1718.53
BTBD7	844.003	0.306412	0.0708359	4.32566	1.52072e-05	0.000191447	731.321	801.949	729.912	996.2	903.141	901.496
CEMIP2	2004.48	-0.233948	0.054146	-4.32069	1.55545e-05	0.00019563	2060.26	2283.16	2157.37	1945.24	1741.09	1839.79
PHLDA3	7149.55	-0.171068	0.0396083	-4.319	1.5674e-05	0.000196943	7861.19	7113.81	7746.66	6680.63	6661.87	6833.14
SLC31A1	3016.37	0.209174	0.0484422	4.31802	1.57438e-05	0.00019763	2740.93	2995.34	2654.02	3270.56	3312.23	3125.13
SCO1	1000.39	0.271567	0.0628998	4.31746	1.57836e-05	0.000197939	854.896	936.605	928.573	1082.66	1096.6	1103.04
CYC1	3610.48	-0.166745	0.0386233	-4.31722	1.58005e-05	0.000197961	3875.39	3725.47	3856.03	3386.49	3423.39	3396.08
CENPB	2288.37	-0.190961	0.0442391	-4.31655	1.58484e-05	0.000198371	2484.67	2417.82	2416.3	2157.45	2117.3	2136.66
ISOC2	285.657	-0.476681	0.110593	-4.31023	1.63086e-05	0.000203935	342.363	331.153	324.777	246.594	214.83	254.225
PLEKHG3	1536.13	-0.233253	0.0541222	-4.30976	1.63435e-05	0.000204176	1672.31	1591.93	1715.4	1458.93	1415.1	1363.12
IFI35	330.611	0.444457	0.103318	4.30183	1.69392e-05	0.000211416	302.86	269.311	267.858	362.523	392.252	388.864
BDP1	580.778	0.37027	0.0860834	4.30129	1.69804e-05	0.000211728	463.912	496.73	561.385	679.853	607.082	675.704
CHD4	8904.97	-0.160952	0.0374258	-4.30056	1.70364e-05	0.000212223	8957.16	9545.59	9703.14	8658.3	8187.05	8378.56
DR1	1112.32	0.255322	0.0594018	4.29823	1.72171e-05	0.00021427	1039.25	1018.4	983.26	1236.9	1219.51	1176.63
TPR	3350.29	0.191787	0.0446512	4.29523	1.74516e-05	0.000216775	3162.3	3237.72	2982.15	3724.45	3461.86	3533.23
UNC5B	220.66	-0.571786	0.13312	-4.29527	1.74479e-05	0.000216775	260.318	248.365	284.599	159.156	162.459	209.067
EVI2A	76.4023	0.895541	0.208548	4.29417	1.75348e-05	0.000217602	55.71	50.8699	53.5715	96.2797	105.812	96.1708
ABCC3	376.786	0.424582	0.0989475	4.29099	1.77882e-05	0.000220537	301.847	347.112	316.965	432.276	405.078	457.438
ZNF395	201.557	-0.549953	0.128183	-4.29038	1.7837e-05	0.000220932	231.956	240.385	246.652	171.928	152.839	165.581
SLC37A1	407.43	0.43521	0.10145	4.28988	1.78773e-05	0.000221222	351.48	311.204	378.349	498.1	417.903	487.544
PHF12	622.168	-0.324068	0.0755515	-4.28936	1.79188e-05	0.000221524	696.882	664.301	714.287	547.223	560.054	550.264
MDM4	576.123	0.348579	0.0812958	4.28778	1.80465e-05	0.000222892	503.416	548.597	467.635	652.344	639.146	645.598
HIVEP3	214.507	0.550683	0.128544	4.28401	1.83557e-05	0.000226496	158.014	189.515	175.223	252.489	238.344	273.459
ECT2	1485.07	0.250733	0.058544	4.28281	1.84549e-05	0.000227506	1365.4	1432.34	1267.86	1659.35	1653.44	1532.04
NOL9	1333.2	0.237702	0.0555053	4.28251	1.848e-05	0.000227601	1189.16	1218.88	1264.51	1410.79	1436.48	1479.36
MCM10	1501.26	0.227497	0.0531948	4.27668	1.89704e-05	0.00023342	1415.03	1349.55	1386.16	1572.9	1613.9	1670.03
GSDMD	217.12	0.553331	0.129409	4.27584	1.90416e-05	0.000234076	185.362	163.582	179.688	230.875	259.72	283.495
MT2A	2022.2	0.215171	0.0503395	4.27441	1.91645e-05	0.000235365	1851.6	1900.14	1864.96	2056.26	2181.43	2278.83
GADD45A	404.684	-0.402919	0.0942719	-4.27401	1.91992e-05	0.000235569	433.525	457.829	492.188	360.558	330.261	353.741
ATP7A	306.571	0.50231	0.117554	4.27302	1.92846e-05	0.000236395	275.511	270.309	214.286	401.821	338.812	338.688
MCAT	897.997	-0.279178	0.0653515	-4.27194	1.93776e-05	0.000237313	1021.01	973.511	959.823	834.097	779.16	820.378
FAM49B	1724.55	0.217766	0.0510388	4.26668	1.98402e-05	0.000242749	1580.14	1607.89	1593.75	1905.95	1887.51	1772.05
INAFM2	180.065	-0.583738	0.13685	-4.26554	1.99421e-05	0.000243767	223.853	228.416	195.313	141.472	147.495	143.838
PEX2	350.376	0.430897	0.101048	4.26426	2.00562e-05	0.000244934	288.679	328.161	277.902	394.943	406.146	406.426
HOOK3	1822.86	0.275108	0.0645392	4.26266	2.02011e-05	0.000246473	1677.38	1773.47	1495.54	2177.1	1907.82	1905.85
LPGAT1	2025.18	0.208219	0.0488922	4.25874	2.05585e-05	0.000250599	1859.7	1952.01	1823.66	2229.17	2182.5	2104.05
LIMK2	267.874	-0.485049	0.113904	-4.2584	2.05891e-05	0.000250738	334.26	310.207	293.527	222.033	210.555	236.664
CEP350	978.101	0.345452	0.0811755	4.25562	2.0847e-05	0.000252935	823.495	899.699	861.608	1265.39	974.751	1043.66
SBDS	2348.39	0.220334	0.0517701	4.25601	2.08108e-05	0.000252935	2183.83	2234.29	2085.94	2648.68	2584.37	2353.26
LOC513659	8.45134	5.47908	1.28748	4.25568	2.08419e-05	0.000252935	0	0.997449	0	12.7718	16.0321	20.9067
LZTS1	58.6121	-1.03898	0.244137	-4.25572	2.08376e-05	0.000252935	90.1489	73.8113	72.5447	31.4383	42.7522	40.9771
DUSP11	496.222	0.352687	0.0829059	4.25406	2.09928e-05	0.000254467	443.654	428.903	435.268	551.152	554.71	563.644
MARVELD2	655.156	0.323277	0.0760324	4.25184	2.12023e-05	0.000256768	559.126	614.429	572.545	761.396	700.068	723.371
NREP	381.911	-0.40747	0.0958834	-4.24964	2.14113e-05	0.000259059	413.267	431.896	460.938	326.172	343.087	316.109
SLCO4A1	91.5762	-0.805688	0.189695	-4.24729	2.16376e-05	0.000261554	123.575	107.725	118.304	62.8766	68.4036	68.5739
OGFR	610.336	0.329159	0.0775122	4.24654	2.17101e-05	0.000262189	546.971	530.643	546.876	671.011	649.834	716.681
XRN1	492.253	0.378333	0.0891384	4.24434	2.19239e-05	0.000264525	430.486	451.845	400.67	603.222	542.953	524.34
PSME1	2179.36	0.198135	0.0467507	4.23812	2.254e-05	0.000271457	2024.81	2010.86	2056.92	2278.29	2285.11	2420.16
ATXN1	173.162	0.626352	0.147783	4.23832	2.25196e-05	0.000271457	125.601	145.628	137.277	244.629	185.972	199.868
CEP55	1155.83	0.256146	0.0605022	4.23367	2.29906e-05	0.000276629	1059.5	1095.2	1003.35	1291.92	1278.29	1206.73
LRCH3	607.764	0.321278	0.0759108	4.23231	2.31303e-05	0.000278053	527.726	537.625	555.804	680.835	679.761	664.833
PALLD	5788.71	0.141638	0.0334771	4.2309	2.32759e-05	0.000279546	5519.34	5459.04	5535.72	6154.04	6050.51	6013.6
LOC100848263	125.341	0.708625	0.167555	4.22922	2.34503e-05	0.000281382	89.136	106.727	89.2858	173.893	147.495	145.511
CRYBG1	769.907	0.2911	0.0688517	4.22793	2.35853e-05	0.000282742	701.946	686.245	689.733	873.395	817.637	850.484
PIAS1	552.281	0.357143	0.0845804	4.22253	2.41577e-05	0.000289338	473.029	530.643	447.545	638.59	628.458	595.422
TTC39B	241.712	0.519606	0.12311	4.22068	2.4357e-05	0.000291458	192.453	220.436	181.92	300.629	293.922	260.915
PIK3C2A	482.367	0.390789	0.0927312	4.21421	2.50654e-05	0.000299661	413.267	462.817	375.001	585.538	529.059	528.521
CSTF3	1382.77	0.224766	0.0533469	4.21329	2.51683e-05	0.000300615	1250.94	1290.7	1284.6	1476.62	1490.98	1502.77
JADE2	279.038	0.485613	0.115318	4.21108	2.54148e-05	0.000303282	233.982	242.38	219.866	348.768	339.88	289.349
DGKQ	587.943	-0.336212	0.0798563	-4.21022	2.55124e-05	0.000304168	686.753	644.352	638.394	535.433	484.169	538.556
GAS2L1	911.353	-0.275884	0.0655746	-4.20718	2.58574e-05	0.000307719	1052.41	960.544	982.144	838.027	803.742	831.25
CPSF7	1711.05	0.206235	0.0490183	4.2073	2.58435e-05	0.000307719	1594.32	1580.96	1592.64	1827.35	1809.49	1861.53
USP36	589.558	-0.377794	0.0898214	-4.20605	2.59872e-05	0.000308982	713.088	569.544	717.635	503.012	505.545	528.521
GORAB	291.095	-0.462312	0.110177	-4.19609	2.71558e-05	0.00032229	362.622	333.148	315.849	262.313	235.137	237.5
PAX2	507.669	-0.373207	0.0889409	-4.19613	2.71519e-05	0.00032229	607.746	538.623	573.662	475.504	399.733	450.748
EXOC5	912.132	0.30917	0.0737147	4.19414	2.73905e-05	0.000324779	763.734	886.733	791.296	1035.5	1065.6	929.929
TJP1	2993.07	0.178299	0.0425135	4.19394	2.74153e-05	0.000324779	2755.11	2839.74	2828.13	3258.77	3211.76	3064.92
AKAP11	1525.72	0.269306	0.0642224	4.19334	2.74876e-05	0.000325341	1288.42	1476.23	1386.16	1820.47	1580.76	1602.29
HAUS6	1095.88	0.260283	0.062078	4.19285	2.75476e-05	0.000325756	1006.83	1039.34	943.082	1199.57	1236.61	1149.87
SHROOM4	828.724	-0.283548	0.06769	-4.18891	2.80294e-05	0.000331153	879.205	943.587	906.251	776.133	739.614	727.553
ELF2	620.029	0.326003	0.0778335	4.18846	2.80848e-05	0.000331508	512.532	566.551	572.545	708.344	666.935	693.266
THEM4	246.855	0.495512	0.118597	4.17811	2.93936e-05	0.000346643	192.453	204.477	217.634	273.12	309.954	283.495
WNT5B	513.949	-0.36314	0.0869272	-4.17751	2.94714e-05	0.000347247	629.017	527.651	578.126	454.873	449.967	444.058
HOMER2	1274.01	0.22933	0.0549067	4.17673	2.95728e-05	0.000348127	1164.85	1165.02	1189.73	1373.46	1367	1384.02
SMTN	1087.11	-0.254367	0.0609471	-4.17357	2.99858e-05	0.000352671	1202.32	1153.05	1190.85	1008.97	1024.99	942.473
HLTF	1374.79	0.269961	0.064701	4.17243	3.01362e-05	0.000354121	1241.83	1338.58	1158.48	1613.18	1402.27	1494.41
ZFP36L2	3234.31	0.17725	0.0425026	4.17032	3.04166e-05	0.000357094	3111.66	2990.35	3002.24	3419.9	3563.4	3318.31
ARSJ	2012.51	-0.220677	0.0529407	-4.16838	3.06769e-05	0.000359827	2083.55	2300.12	2112.73	1948.19	1838.35	1792.12
COL18A1	3784.52	-0.184967	0.0443772	-4.16807	3.07187e-05	0.000359994	4154.95	3859.13	4066.97	3729.37	3416.97	3479.71
GZF1	357.834	-0.423351	0.101575	-4.16785	3.07483e-05	0.000360017	405.164	375.041	449.777	306.523	315.298	295.202
ZDHHC7	2663.84	-0.190049	0.045613	-4.16656	3.09232e-05	0.000361741	2811.84	2737	2969.87	2417.8	2535.21	2511.31
UGDH	2739.45	0.179063	0.0430017	4.16409	3.1259e-05	0.000365185	2519.11	2615.31	2574.78	2994.5	2846.23	2886.8
BCLAF1	2700.84	0.206819	0.0496685	4.16399	3.12736e-05	0.000365185	2497.83	2675.16	2347.1	2989.58	2853.71	2841.64
PLEKHH2	369.206	-0.406537	0.0976427	-4.16351	3.13391e-05	0.000365623	402.125	418.929	440.849	323.225	332.399	297.711
NEK6	2217.54	0.186579	0.0448478	4.16028	3.17857e-05	0.000370502	2069.37	2072.7	2080.36	2318.57	2410.16	2354.09
UBB	8750.6	-0.128086	0.0307909	-4.15986	3.18445e-05	0.000370856	9164.8	9143.62	9110.5	8336.06	8247.98	8500.66
POLH	946.684	0.267712	0.0643773	4.15848	3.20371e-05	0.000372767	851.857	879.75	843.751	1026.66	1083.77	994.322
PDK4	112.374	0.729297	0.175549	4.15439	3.26163e-05	0.000379168	71.9166	95.7551	85.9376	148.349	136.807	135.475
SPAG1	409.928	0.378645	0.0911512	4.15403	3.26674e-05	0.000379425	350.467	356.089	362.724	480.416	457.449	452.421
FUK	197.988	0.538175	0.129605	4.15242	3.28977e-05	0.000381759	169.156	151.612	164.063	231.857	228.725	242.518
ASAP1	1562.09	0.218437	0.0526171	4.15144	3.30383e-05	0.00038305	1508.22	1422.36	1401.79	1678.02	1654.51	1707.66
PRDM1	10.472	3.1786	0.765896	4.15017	3.32235e-05	0.000384856	3.03873	1.9949	1.11607	12.7718	28.8578	15.0528
CBX4	119.728	-0.678006	0.164027	-4.13351	3.57269e-05	0.000413488	142.82	148.62	150.67	92.3499	91.9173	91.9894
SERTAD4	275.546	-0.454253	0.109977	-4.13043	3.62081e-05	0.000418316	319.066	303.225	333.706	229.892	234.069	233.319
NCKAP1	2830.16	0.222371	0.0538369	4.13045	3.62053e-05	0.000418316	2702.44	2704.09	2427.46	3269.58	2994.79	2882.61
DOCK4	397.522	0.408625	0.098948	4.1297	3.63243e-05	0.000419288	340.338	325.169	360.492	492.206	406.146	460.783
MR1	138.75	0.635634	0.153983	4.12795	3.66008e-05	0.000422105	105.343	116.702	103.795	165.051	171.009	170.599
TNS3	609.881	-0.312278	0.0757034	-4.12502	3.70707e-05	0.000427147	676.623	673.278	677.456	559.994	525.853	546.083
B3GNT8	148.82	-0.608837	0.147766	-4.12029	3.78394e-05	0.00043562	185.362	178.543	175.223	123.788	115.431	114.569
PLEKHH3	89.19	-0.804144	0.195254	-4.11844	3.81439e-05	0.000438738	122.562	104.732	112.723	56.9819	73.7476	64.3926
MYH10	3345.2	0.166256	0.0405024	4.10485	4.04575e-05	0.000464941	3065.06	3246.7	3145.09	3582	3540.95	3491.42
ASS1	3372.07	-0.171878	0.041915	-4.10063	4.12019e-05	0.000473079	3690.03	3495.06	3534.6	3077.02	3170.08	3265.62
FKBP5	1672.7	0.210388	0.0513161	4.09984	4.1344e-05	0.000474293	1500.12	1585.94	1565.85	1842.09	1797.73	1744.45
BSN	43.018	-1.15414	0.281915	-4.09392	4.24135e-05	0.000486135	60.7746	54.8597	62.5001	21.6138	29.9266	28.4331
RC3H2	500.282	0.355626	0.08692	4.09142	4.28736e-05	0.000490978	430.486	432.893	453.126	608.134	549.366	527.685
EFNB2	458.283	-0.369707	0.0904206	-4.08875	4.33703e-05	0.000496231	516.584	542.613	488.84	407.715	424.316	369.63
ATP6V0C	1570.22	-0.221814	0.0542575	-4.08817	4.34783e-05	0.000497031	1775.63	1653.77	1643.98	1464.83	1393.72	1489.39
RITA1	239.16	-0.481903	0.117894	-4.08758	4.35893e-05	0.000497508	288.679	284.273	263.393	199.437	193.454	205.722
TENM4	80.6136	-0.843848	0.206444	-4.08754	4.35962e-05	0.000497508	99.2651	107.725	103.795	68.7712	48.0963	56.0299
ATAD3A	1387.03	-0.226995	0.0555411	-4.08697	4.37034e-05	0.000498295	1495.05	1454.28	1540.18	1225.11	1287.91	1319.63
RMDN3	246.361	0.477548	0.116889	4.08548	4.39864e-05	0.000501084	213.724	204.477	199.777	271.155	289.646	299.384
ALDH1A1	2367.23	-0.200425	0.0490885	-4.08292	4.44726e-05	0.000506181	2627.49	2536.51	2426.34	2151.56	2321.45	2140.01
RIPOR3	695.77	-0.291575	0.0714883	-4.07864	4.52998e-05	0.000515147	768.798	746.092	782.367	621.888	639.146	616.329
LOXL1	1841.73	-0.213205	0.0522931	-4.07712	4.55964e-05	0.000518068	2087.61	1872.21	1974.33	1693.74	1678.03	1744.45
TMEM140	15.2458	2.16854	0.53242	4.07299	4.64131e-05	0.00052689	3.03873	7.9796	5.58037	30.4558	23.5137	20.9067
MSRB1	2241.95	-0.181697	0.0446476	-4.06958	4.70976e-05	0.000534196	2344.89	2388.89	2416.3	2121.1	2068.14	2112.41
TULP3	821.799	0.294219	0.0723361	4.06739	4.75419e-05	0.000538767	693.843	757.064	764.51	837.044	945.893	932.438
CKAP2L	1028.46	0.256636	0.0631104	4.06646	4.77327e-05	0.00054046	923.773	955.557	930.805	1075.78	1188.51	1096.35
ZNF672	228.975	0.501098	0.123286	4.0645	4.81351e-05	0.000544544	205.621	179.541	184.152	260.348	256.513	287.676
MCM5	4947.34	-0.149157	0.0367023	-4.06397	4.82454e-05	0.000545319	5312.71	5040.11	5257.82	4723.6	4621.52	4728.26
SIPA1L2	668.813	-0.321178	0.0791155	-4.05961	4.91538e-05	0.000555106	782.979	727.141	719.867	635.643	537.609	609.639
OSGIN2	1395.68	0.222063	0.0547069	4.05915	4.92519e-05	0.000555733	1291.46	1325.61	1248.89	1482.51	1476.02	1549.6
CHAF1A	1663.58	-0.203157	0.0500597	-4.0583	4.94311e-05	0.000557273	1802.98	1770.47	1767.86	1505.11	1575.42	1559.64
ANXA1	13660.1	0.118875	0.029308	4.05606	4.99083e-05	0.000562168	13034.1	13120.5	13140.6	14445.9	13911.6	14307.7
PBXIP1	437.988	-0.358502	0.088416	-4.05472	5.01939e-05	0.000564898	477.08	508.699	489.956	383.154	394.389	374.648
CA4	46.3964	1.1161	0.275451	4.05189	5.08049e-05	0.000571282	34.4389	28.926	24.5536	61.8941	56.6467	71.919
RNH1	3119.14	-0.191542	0.0472946	-4.04997	5.12246e-05	0.000575506	3499.6	3171.89	3309.16	2959.13	2770.35	3004.71
HK2	1831.38	0.200117	0.0494429	4.04744	5.17806e-05	0.000581251	1640.91	1769.48	1703.13	1971.77	1949.5	1953.52
SUSD6	139.203	0.642437	0.158956	4.04159	5.309e-05	0.000594927	108.381	107.725	110.491	187.647	145.358	175.616
KLF3	669.44	-0.345166	0.0854023	-4.04165	5.30774e-05	0.000594927	678.649	833.868	733.26	559.012	642.352	569.498
MED13	995.505	0.276542	0.068434	4.04101	5.32216e-05	0.00059538	874.141	954.559	870.537	1171.08	1081.63	1021.08
AFF4	1321.35	0.283787	0.0702248	4.04113	5.31947e-05	0.00059538	1091.92	1281.72	1199.78	1570.93	1467.47	1316.28
MBD4	403.112	-0.375822	0.0930114	-4.04061	5.33132e-05	0.000595894	453.783	433.891	478.795	335.997	359.119	357.086
SRSF10	2427.66	0.177411	0.043919	4.0395	5.35656e-05	0.000598203	2280.06	2333.03	2220.99	2563.2	2604.68	2564
ANLN	3874.61	0.18582	0.0460122	4.03849	5.37953e-05	0.000600254	3382.1	3829.21	3664.07	4241.22	4105.28	4025.79
PLEKHF2	376.823	0.426714	0.105681	4.03775	5.39665e-05	0.00060165	286.653	343.123	333.706	411.645	485.238	400.572
TC2N	349.772	0.432377	0.107094	4.03737	5.40533e-05	0.000602103	283.615	311.204	296.875	396.908	452.105	357.922
ZBTB4	516.636	-0.339627	0.0842594	-4.03073	5.56029e-05	0.000618837	600.655	583.508	547.992	467.644	427.522	472.491
WWC1	6635.31	-0.152193	0.0377759	-4.02885	5.60501e-05	0.000623283	7202.8	6798.62	6956.48	6447.79	6023.79	6382.39
ARHGEF40	1578.45	-0.22368	0.0556291	-4.02091	5.7974e-05	0.000644128	1753.35	1611.88	1738.84	1504.13	1379.83	1482.7
LOC789960	77.5145	0.849603	0.211347	4.01994	5.82142e-05	0.000646247	46.5938	65.8317	53.5715	102.174	94.0549	102.861
ECPAS	3279.53	0.17879	0.0444808	4.01949	5.83245e-05	0.000646921	2927.31	3081.12	3224.34	3555.47	3377.43	3511.49
TAF6L	267.117	-0.446824	0.111248	-4.01645	5.90802e-05	0.000654747	314.002	296.242	314.733	223.998	221.243	232.482
FKBP4	7124.29	-0.129	0.0321314	-4.01475	5.95078e-05	0.000658926	7340.55	7438.98	7548	6850.6	6826.46	6741.15
OSGIN1	159.089	-0.57832	0.144088	-4.01365	5.97873e-05	0.000660901	190.427	187.521	193.081	127.718	137.876	117.914
ACAN	279.697	-0.442628	0.11028	-4.01366	5.97838e-05	0.000660901	332.234	301.23	333.706	226.945	241.55	242.518
CHD1	1229.58	0.265423	0.0661363	4.01326	5.98849e-05	0.000661419	1060.52	1193.95	1094.87	1459.92	1287.91	1280.33
YTHDC2	271.254	0.45205	0.112716	4.01054	6.05796e-05	0.000668526	228.918	240.385	217.634	335.014	300.335	305.238
DLGAP5	1428.68	0.233162	0.0581501	4.00966	6.08053e-05	0.00067045	1299.56	1386.45	1251.12	1550.3	1612.83	1471.83
KIF27	297.535	0.494914	0.123465	4.00854	6.1096e-05	0.000673087	252.214	255.347	233.259	417.54	298.197	328.653
KMT2E	1285.45	0.226836	0.0566189	4.00638	6.16575e-05	0.0006787	1173.96	1204.92	1175.22	1443.21	1333.87	1381.51
KCMF1	1680.82	-0.201747	0.05038	-4.00451	6.2146e-05	0.000683502	1823.24	1814.36	1755.58	1608.26	1549.77	1533.71
GAPVD1	1226.92	0.241712	0.0603663	4.00409	6.22558e-05	0.000684132	1077.74	1187.96	1107.14	1392.13	1283.64	1312.94
MITD1	124.081	0.661768	0.165484	3.99899	6.36139e-05	0.000698469	94.2006	106.727	87.0537	141.472	160.321	154.709
CDC42SE2	1366.04	0.235525	0.0589129	3.99785	6.39213e-05	0.000701254	1245.88	1279.73	1235.49	1485.46	1569.01	1380.68
TEF	603.996	-0.317448	0.0795134	-3.99238	6.54121e-05	0.000717007	667.507	704.199	639.51	557.047	501.27	554.445
SOX4	504.875	-0.344471	0.0863014	-3.99149	6.56607e-05	0.000719128	581.41	561.564	550.224	416.557	486.307	433.187
PRR5	623.438	-0.31241	0.0783228	-3.98875	6.64217e-05	0.000726853	710.049	685.248	678.572	544.275	523.715	598.767
ZC3H7B	1375.43	0.215856	0.0541301	3.98772	6.67124e-05	0.000729423	1260.06	1245.81	1313.62	1456.97	1479.23	1496.92
B3GNT2	427.336	0.372333	0.0934152	3.98579	6.72563e-05	0.000734754	403.138	375.041	338.17	500.065	480.963	466.637
CAVIN1	5534.49	-0.144351	0.0363029	-3.9763	6.99961e-05	0.000764046	5948.82	5593.7	5891.75	5230.54	5282.04	5260.12
PDE5A	1060.99	0.267408	0.0672553	3.97601	7.00815e-05	0.000764339	949.096	1008.42	930.805	1261.46	1088.04	1128.12
PLSCR4	23.908	1.56523	0.39382	3.97449	7.05289e-05	0.000768577	14.1807	10.9719	11.1607	32.4207	32.0642	42.6496
MYO9A	357.07	0.441169	0.111074	3.97185	7.13154e-05	0.000776499	327.17	302.227	277.902	469.609	405.078	360.431
SNX4	974.679	0.256319	0.0645746	3.96935	7.20702e-05	0.000783411	844.766	940.595	878.349	1071.85	1080.56	1031.95
GRAMD1B	483.977	-0.350719	0.0883525	-3.96954	7.20114e-05	0.000783411	568.242	507.702	551.34	396.908	453.174	426.496
WDR6	2050.7	-0.191465	0.048258	-3.96752	7.26243e-05	0.000788122	2274.99	2124.57	2159.6	1867.63	1954.85	1922.58
PRKAA2	175.465	0.550852	0.138838	3.9676	7.26003e-05	0.000788122	145.859	133.658	147.322	201.401	225.518	199.032
TM4SF1	26162.6	0.117133	0.0295477	3.9642	7.36411e-05	0.000798492	25276.1	25235.5	24789.1	26444.5	27951.4	27279
GLA	236.827	0.484779	0.122316	3.96333	7.39107e-05	0.00080075	207.646	188.518	196.429	300.629	250.101	277.641
TFAP2A	178.512	0.564203	0.142433	3.96119	7.45783e-05	0.000807313	151.936	138.645	140.625	211.226	240.481	188.16
LOC101907799	6.96948	5.18163	1.30849	3.96	7.49511e-05	0.00081051	1.01291	0	0	14.7367	16.0321	10.0352
ADPRHL1	272.719	-0.477126	0.120491	-3.95985	7.49978e-05	0.00081051	338.312	271.306	342.634	246.594	223.38	214.084
LPIN2	1434.95	0.230154	0.0581526	3.95776	7.56553e-05	0.00081694	1322.86	1281.72	1360.49	1607.28	1437.54	1599.78
GRAMD2B	327.803	0.451908	0.114227	3.95624	7.61381e-05	0.000821473	288.679	309.209	231.027	358.593	414.697	364.613
TSPO	2659.84	-0.170816	0.0431786	-3.95602	7.62077e-05	0.000821545	2872.61	2729.02	2850.45	2540.61	2474.29	2492.08
TNIK	1100.71	0.258597	0.0654308	3.95222	7.74283e-05	0.000834015	953.148	1087.22	964.287	1222.16	1233.4	1144.01
TFPI2	3291.07	-0.186643	0.04724	-3.95094	7.78444e-05	0.000837807	3643.43	3537.95	3329.25	3238.14	2928.53	3069.1
DYNLL2	1743.89	-0.210552	0.0533201	-3.94883	7.85343e-05	0.000844535	1893.13	1886.18	1830.36	1553.25	1728.26	1572.18
NLRX1	437.578	0.364412	0.0923235	3.94712	7.90957e-05	0.000849872	389.97	365.067	393.974	519.714	449.967	506.778
LRRK2	654.605	0.328789	0.0833238	3.94592	7.94951e-05	0.000853461	556.087	627.396	556.92	805.606	680.829	700.792
JUP	1630.46	-0.218639	0.0554653	-3.9419	8.08393e-05	0.000867179	1861.73	1640.8	1760.05	1494.3	1488.85	1537.06
MRS2	1267.33	0.235539	0.0597952	3.9391	8.17889e-05	0.000876646	1162.82	1236.84	1090.4	1403.92	1374.48	1335.52
RALGPS2	1630.65	0.204585	0.0519522	3.93795	8.21811e-05	0.000877966	1522.4	1574.97	1446.43	1757.6	1753.91	1728.56
BPTF	1046.36	0.238414	0.0605383	3.93823	8.20848e-05	0.000877966	928.838	969.521	982.144	1157.32	1122.25	1118.09
TUFT1	709.196	-0.294911	0.074882	-3.93835	8.2045e-05	0.000877966	769.811	789.98	783.483	589.468	689.38	633.054
OGT	703.295	0.30195	0.0766751	3.93804	8.21494e-05	0.000877966	610.784	662.306	614.956	823.29	790.917	717.517
TCAM1	5101.98	0.134576	0.0342082	3.93404	8.35305e-05	0.000890499	4914.64	4838.63	4839.29	5342.54	5328	5348.77
BIN1	2921.02	-0.177961	0.0452371	-3.93396	8.35589e-05	0.000890499	3247.39	2939.48	3116.08	2703.69	2775.69	2743.79
C23H6orf47	305.729	0.431707	0.109737	3.93403	8.35338e-05	0.000890499	247.15	288.263	244.42	365.47	361.256	327.817
NRAS	2562.75	0.219618	0.0558302	3.93368	8.36553e-05	0.000890799	2398.57	2463.7	2236.61	2760.67	2975.56	2541.42
GDAP2	328.083	0.456968	0.116198	3.93267	8.40066e-05	0.000893564	251.202	323.174	255.581	399.856	335.605	403.081
GTPBP1	935.589	0.274914	0.0699074	3.93254	8.40518e-05	0.000893564	830.586	877.756	832.59	934.306	1045.29	1093
ANKIB1	863.136	0.264238	0.0672222	3.93082	8.46573e-05	0.000899268	799.185	782	770.09	979.499	956.581	891.461
ZMYM1	566.629	0.323527	0.0823722	3.92763	8.57877e-05	0.000910535	491.261	519.671	497.769	669.046	639.146	582.878
BOLA-DQA2	63.2774	0.940789	0.239779	3.92357	8.72475e-05	0.000925277	31.4002	53.8623	44.6429	83.5079	87.6421	78.6091
STT3B	2718.79	0.173575	0.044259	3.92181	8.78875e-05	0.000931308	2521.13	2628.28	2514.51	2975.83	2881.5	2791.46
EML4	4572.37	0.151675	0.0387097	3.91827	8.91881e-05	0.000944323	4254.22	4457.6	4281.26	4771.74	4972.09	4697.31
JSP.1	2307.48	0.453077	0.115641	3.91795	8.93035e-05	0.000944779	2186.87	1832.31	1824.78	2387.34	2843.02	2770.55
CD24	405.784	-0.387855	0.0990281	-3.91662	8.98009e-05	0.000949272	489.235	443.865	448.661	330.102	328.123	394.718
MID1IP1	512.33	-0.320349	0.0818296	-3.91484	9.04659e-05	0.000955528	556.087	565.554	585.938	452.908	451.036	462.456
NUDCD1	1578.07	0.219943	0.0562259	3.91178	9.16182e-05	0.000965862	1482.9	1499.17	1389.51	1797.88	1679.09	1619.85
SMAD7	857.686	-0.258899	0.0661866	-3.91165	9.16663e-05	0.000965862	947.07	897.705	959.823	789.887	758.852	792.782
C7H5orf24	161.597	0.572121	0.146253	3.91186	9.15861e-05	0.000965862	135.73	136.651	117.188	211.226	180.628	188.16
TOM1	578.745	-0.313008	0.0800436	-3.91047	9.21185e-05	0.000969845	671.559	603.457	648.438	535.433	515.165	498.415
DKK3	2111.99	-0.193626	0.0495174	-3.91027	9.21946e-05	0.000969863	2319.56	2239.27	2202.01	2070.01	1880.03	1961.05
CHCHD2	3210.11	-0.169786	0.0434507	-3.90756	9.32329e-05	0.000979996	3505.68	3276.62	3415.18	2906.08	3069.61	3087.5
DOCK7	1261.07	0.259874	0.0665189	3.90677	9.35363e-05	0.000982395	1134.46	1218.88	1088.17	1506.09	1324.25	1294.54
RGMB	334.241	-0.393326	0.100733	-3.90462	9.43719e-05	0.000990374	377.815	398.98	361.608	281.962	290.715	294.366
CLU	2996.17	0.175923	0.0450994	3.90077	9.58858e-05	0.00100545	2935.41	2780.89	2726.57	3138.92	3087.78	3307.44
ASB8	386.327	-0.364823	0.0935384	-3.90025	9.60926e-05	0.00100681	419.344	442.868	443.081	331.084	334.536	347.051
RYBP	859.975	0.274656	0.0704652	3.89776	9.70878e-05	0.00101642	746.514	828.881	757.814	908.763	1004.68	913.204
TMED3	1395.48	-0.223245	0.0573316	-3.89393	9.86327e-05	0.00103177	1550.76	1447.3	1514.51	1294.86	1217.37	1348.06
ODC1	9610.7	-0.119082	0.0305899	-3.89285	9.90722e-05	0.00103554	9890.05	10103.2	10026.8	9092.54	9362.74	9188.91
FRYL	963.353	0.274889	0.0706226	3.89237	9.92715e-05	0.00103679	820.457	945.582	849.332	1126.87	995.058	1042.83
ZBTB2	265.238	-0.457976	0.117734	-3.88991	0.00010028	0.00104648	322.105	320.181	277.902	247.576	213.761	209.903
ADAMTS16	1179.54	0.234046	0.0602071	3.88735	0.000101345	0.00105676	1064.57	1085.23	1104.91	1293.88	1198.13	1330.5
TTI2	444.457	0.374932	0.0965485	3.88335	0.000103027	0.00107344	386.931	356.089	419.643	453.89	506.614	543.574
TMBIM4	2421.87	0.166617	0.0429964	3.87514	0.000106565	0.00110942	2281.07	2289.15	2275.67	2543.55	2588.65	2553.12
VLDLR	241.17	-0.468424	0.120989	-3.87162	0.000108117	0.00112467	259.305	280.283	301.34	213.191	183.835	209.067
NUP62	2181.22	-0.182731	0.0472273	-3.86919	0.000109199	0.00113412	2410.72	2260.22	2286.83	1989.45	2062.8	2077.29
PCF11	675.631	0.28392	0.0733774	3.86931	0.000109144	0.00113412	591.539	642.357	593.751	746.659	738.545	740.933
TFEB	179.474	-0.539139	0.139352	-3.86891	0.000109321	0.00113449	239.047	202.482	196.429	140.49	145.358	153.037
QKI	1967.63	0.208127	0.0538232	3.86687	0.000110243	0.00114315	1851.6	1906.13	1716.52	2203.63	2125.86	2002.02
TTC17	333.52	0.390936	0.101124	3.86589	0.000110683	0.0011468	286.653	298.237	281.25	388.066	358.05	388.864
TMEM86A	332.264	-0.438544	0.113498	-3.86388	0.000111601	0.00115539	347.428	406.959	392.858	236.77	311.023	298.547
ACKR3	37.1144	-1.17482	0.304069	-3.86366	0.0001117	0.0011555	56.7229	51.8674	45.759	18.6665	24.5825	25.088
CDYL2	763.256	0.282772	0.0732908	3.85821	0.000114218	0.00118062	648.262	694.225	725.447	868.482	783.435	859.683
MIF	2459.83	-0.195469	0.0507046	-3.85504	0.000115709	0.00119508	2701.43	2440.76	2739.96	2274.36	2231.67	2370.82
ABHD2	1675.67	0.235975	0.061252	3.85252	0.000116906	0.00120649	1451.5	1609.88	1555.81	1977.66	1692.99	1766.2
CHD2	799.562	-0.266578	0.0692164	-3.85138	0.000117456	0.00121121	826.534	903.689	890.626	721.116	708.618	746.787
ALAD	689.634	-0.282771	0.0734271	-3.85105	0.000117613	0.00121187	724.23	769.034	779.019	637.608	593.187	634.727
ARFGEF1	2317.52	0.212513	0.0552864	3.84387	0.00012111	0.00124692	2108.88	2287.15	2043.53	2678.15	2389.85	2397.58
RHPN2	1036.06	0.257031	0.0668716	3.84365	0.000121216	0.00124702	899.464	1016.4	916.296	1184.83	1064.53	1134.81
MYO5A	1421.31	0.230437	0.0599604	3.84316	0.000121461	0.00124856	1242.84	1368.5	1311.39	1636.76	1516.64	1451.76
SSFA2	196.63	0.495945	0.129072	3.84239	0.000121842	0.0012515	171.182	157.597	160.715	226.945	230.862	232.482
NCAPH	1552.9	0.19774	0.0514673	3.84204	0.000122014	0.00125227	1434.28	1440.32	1464.29	1660.33	1698.33	1619.85
GOLGA4	1681	0.203637	0.0530595	3.8379	0.000124089	0.00127257	1493.03	1598.91	1595.98	1879.42	1754.98	1763.69
GPRC5A	663.148	0.322227	0.0839687	3.83746	0.000124311	0.00127385	602.681	588.495	579.242	740.764	649.834	817.87
CLSTN1	2682.98	-0.166866	0.0435364	-3.83279	0.0001267	0.00129629	2838.17	2804.83	2873.89	2568.11	2430.47	2582.39
HNRNPF	7271.13	0.130313	0.0339994	3.8328	0.000126691	0.00129629	6877.65	6846.49	7109.39	7607.08	7423.93	7762.23
PSME4	1512.85	0.24218	0.0632145	3.83109	0.000127575	0.00130423	1358.31	1490.19	1306.92	1755.63	1644.89	1521.17
CEBPA	94.8254	-0.711007	0.185847	-3.82576	0.000130368	0.00133174	119.523	109.719	123.884	67.7888	76.954	71.0827
SMIM13	176.246	0.573201	0.149915	3.82351	0.000131568	0.00134294	142.82	158.594	122.768	180.77	242.619	209.903
NACC2	627.687	0.304827	0.0798225	3.8188	0.0001341	0.00136772	536.842	538.623	611.608	681.818	668.004	729.225
ACTR2	5570.18	0.158812	0.0416012	3.81748	0.000134821	0.00137399	5100	5476	5210.95	5929.06	6114.64	5590.45
TOPBP1	2336.42	0.177785	0.0465974	3.81535	0.000135989	0.00138482	2141.29	2283.16	2154.02	2523.9	2404.81	2511.31
SLK	663.596	0.30662	0.080377	3.81478	0.000136305	0.00138695	619.901	635.375	523.438	713.256	742.82	746.787
ZMYM5	341.734	0.38267	0.100326	3.81427	0.000136584	0.00138763	309.95	301.23	277.902	386.101	399.733	375.484
INTS4	569.813	0.308512	0.0808796	3.81446	0.000136483	0.00138763	529.752	488.75	510.045	644.485	591.05	654.797
ATXN7L3B	2029.11	-0.17951	0.0471404	-3.80799	0.000140102	0.00142226	2210.17	2129.55	2127.24	1900.05	1860.79	1946.83
INO80	1183.09	0.218418	0.057423	3.80366	0.000142571	0.00144621	1106.1	1068.27	1107.14	1305.67	1249.43	1261.93
RPL28	5413.42	-0.164406	0.0432778	-3.79886	0.000145361	0.00147336	5914.38	5313.41	5938.62	5008.51	5163.4	5142.21
MGAT2	1051.8	0.263635	0.0694481	3.79615	0.000146959	0.00148841	973.406	969.521	921.876	1223.15	1191.72	1031.12
LOC112443160	24.7412	1.47453	0.388579	3.79466	0.000147844	0.00149621	11.142	17.9541	10.0447	30.4558	39.5458	39.3046
TTYH3	1927.85	-0.203974	0.0537556	-3.79447	0.000147959	0.00149621	2170.66	1904.13	2117.19	1785.1	1813.76	1776.23
MXD1	120.697	-0.633551	0.166984	-3.79407	0.000148197	0.00149746	142.82	162.584	135.045	98.2446	87.6421	97.8433
UBTD1	213.726	-0.482064	0.127136	-3.79172	0.00014961	0.00151056	259.305	229.413	258.929	163.086	185.972	185.651
TIMELESS	885.854	0.244654	0.0645766	3.78859	0.000151502	0.00152849	817.418	797.96	816.965	986.376	959.788	936.62
DSTN	3557.93	-0.153939	0.0406528	-3.78668	0.000152672	0.00153909	3709.27	3823.22	3712.06	3263.69	3357.12	3482.22
DNAJB1	1084.77	-0.244403	0.0645509	-3.7862	0.000152968	0.00154089	1193.21	1116.15	1223.22	979.499	939.481	1057.04
PTCH1	192.171	-0.504535	0.133276	-3.78565	0.000153309	0.00154314	225.879	219.439	231.027	177.823	147.495	151.364
DNAJA1	2727.45	0.178493	0.0472066	3.78111	0.000156131	0.00157033	2458.33	2677.15	2543.53	2919.83	2770.35	2995.51
CDH17	10306.2	0.121469	0.0321572	3.77735	0.000158506	0.00159299	10037.9	9881.73	9697.56	11022.1	10505.3	10692.5
CCNT2	248.839	0.441699	0.117006	3.77502	0.000159993	0.0016067	200.556	225.424	206.474	287.857	299.266	273.459
FUNDC1	329.48	0.391125	0.103644	3.77375	0.000160811	0.00161367	295.77	281.281	279.018	382.172	343.087	395.554
NLK	470.205	0.334535	0.0887735	3.76841	0.000164291	0.00164733	433.525	396.985	416.295	548.205	538.678	487.544
FGFR1	3079.35	-0.15614	0.0414533	-3.76665	0.000165455	0.00165772	3250.43	3187.85	3301.34	2981.72	2826.99	2927.77
TMOD2	142.894	0.582595	0.154683	3.76637	0.000165636	0.00165827	117.497	121.689	103.795	187.647	160.321	166.417
TJP2	1100.78	0.229421	0.0610417	3.75843	0.000170983	0.00171048	986.574	988.472	1066.97	1221.18	1148.97	1192.52
CORO2B	594.91	-0.287407	0.0765126	-3.75633	0.000172424	0.00172095	654.339	643.355	665.18	536.416	521.577	548.591
PKDCC	987.91	-0.249474	0.0664126	-3.75643	0.000172351	0.00172095	1062.54	1041.34	1117.19	835.079	921.311	950
OXTR	32.5556	-1.25721	0.334663	-3.75666	0.000172197	0.00172095	48.6196	51.8674	36.8304	24.5612	19.2385	14.2165
LOC101906072	1097.43	-0.234206	0.0623605	-3.75568	0.000172872	0.00172409	1136.48	1168.01	1254.47	1047.29	1005.75	972.579
KCNJ16	178.117	-0.544481	0.14502	-3.75451	0.000173681	0.00173084	205.621	243.378	185.268	149.332	130.394	154.709
TSC22D2	590.897	-0.306075	0.081694	-3.74661	0.000179243	0.00178491	682.701	630.388	646.206	575.714	511.958	498.415
FDPS	916.909	0.25083	0.0670386	3.74157	0.000182872	0.00181966	836.663	820.901	857.144	999.148	933.068	1054.53
C5H12orf29	496.929	0.337462	0.0902031	3.74114	0.000183191	0.00182145	465.938	450.847	400.67	579.643	506.614	577.861
EID2	186.955	0.506564	0.1356	3.73571	0.000187186	0.00185975	142.82	160.589	159.598	210.243	239.413	209.067
ATP11B	1078.62	0.2238	0.0600068	3.72957	0.000191803	0.00190417	979.483	1022.39	984.376	1168.13	1126.52	1190.84
ITPKB	370.34	-0.35641	0.0955923	-3.72844	0.00019267	0.00190988	418.332	405.962	424.108	331.084	308.885	333.671
GPSM2	1751.14	0.182158	0.0488543	3.7286	0.000192547	0.00190988	1606.47	1665.74	1649.56	1877.45	1866.14	1841.46
EGFR	427.077	0.351804	0.0943871	3.72724	0.000193587	0.00191751	350.467	386.013	389.509	521.679	453.174	461.62
DUSP14	630.434	-0.293766	0.0788799	-3.72422	0.000195921	0.00193916	742.463	684.25	655.135	595.362	564.33	541.065
USP37	301.689	0.413189	0.110976	3.72324	0.000196681	0.00194521	259.305	272.304	243.304	366.452	360.188	308.583
SPPL2A	883.292	0.241301	0.0648213	3.72256	0.000197211	0.00194897	787.031	827.883	813.617	980.481	949.1	941.637
TGFB3	110.566	-0.671029	0.180368	-3.72034	0.000198958	0.00196327	143.833	120.691	143.973	88.4202	69.4724	97.007
TGFBR3	1560.34	-0.229805	0.0617691	-3.72039	0.000198913	0.00196327	1541.65	1822.34	1687.5	1494.3	1443.96	1372.31
TSPAN9	2517.49	-0.157774	0.0424168	-3.7196	0.000199542	0.00196754	2633.56	2653.22	2678.58	2362.78	2390.92	2385.87
SECISBP2L	604.145	0.320991	0.0863549	3.71712	0.00020151	0.00198544	484.171	563.559	563.617	733.887	654.109	625.528
FBXO33	103.542	0.678589	0.182674	3.71476	0.000203393	0.00200248	80.0198	78.7985	80.3573	143.437	109.018	129.621
C4H7orf57	364.172	0.368655	0.0992944	3.71274	0.000205024	0.00201702	303.873	314.197	337.054	401.821	389.045	439.04
RB1	192.556	0.481771	0.129865	3.70978	0.000207436	0.00203921	164.091	160.589	157.366	227.928	221.243	224.12
PRR16	31.6325	1.28774	0.347186	3.70908	0.000208017	0.00204339	22.284	11.9694	21.2054	49.1223	34.2018	51.0123
S100A4	4254.35	-0.139744	0.0376969	-3.70703	0.000209703	0.0020584	4432.49	4367.83	4582.6	3981.85	4063.6	4097.71
MAVS	782.601	0.271788	0.0733671	3.7045	0.000211808	0.0020775	658.391	746.092	723.215	907.78	815.499	844.63
UBE2W	849.604	0.254444	0.0687138	3.70295	0.000213107	0.00208841	774.876	802.947	744.421	927.429	971.545	876.408
SLC25A17	603.007	0.284168	0.0767442	3.70279	0.00021324	0.00208841	544.945	558.572	526.786	672.976	673.348	641.417
TEP1	488.658	0.315631	0.0852576	3.70209	0.000213831	0.00209106	439.603	412.944	454.242	561.959	527.99	535.211
TRIM44	476.804	0.337294	0.0911072	3.70217	0.000213764	0.00209106	380.854	470.796	411.831	529.539	537.609	530.194
EGR2	10.5385	2.50476	0.676742	3.70121	0.000214576	0.00209677	3.03873	0.997449	5.58037	12.7718	22.4449	18.3979
SETX	1125.01	0.23235	0.0627822	3.70089	0.000214843	0.00209781	1006.83	1067.27	1031.25	1268.34	1128.66	1247.71
GYG2	1802.5	-0.190307	0.0514248	-3.70068	0.000215022	0.00209799	1815.13	1985.92	1962.06	1678.02	1712.23	1661.66
SALL2	95.1804	-0.700721	0.189419	-3.69931	0.000216184	0.00210775	108.381	110.717	135.045	67.7888	70.5412	78.6091
ILDR2	404.277	-0.362208	0.0979328	-3.69854	0.000216842	0.0021126	451.758	418.929	493.304	334.032	384.77	342.87
PLEKHM1	494.616	-0.317091	0.0857425	-3.69818	0.00021715	0.00211402	564.191	552.587	527.903	426.382	473.481	423.151
LRCH2	171.001	0.518042	0.14009	3.69794	0.000217359	0.00211447	148.898	140.64	131.697	209.261	207.348	188.16
PGP	511.408	-0.309277	0.0837595	-3.69244	0.000222114	0.00215751	590.526	544.607	563.617	473.539	432.866	463.292
ZNF518A	703.839	0.325217	0.0880735	3.69256	0.000222006	0.00215751	597.617	713.176	561.385	841.956	793.054	715.845
SCP2	1158.43	0.214877	0.0582247	3.69048	0.000223832	0.00217259	1032.15	1096.2	1088.17	1252.62	1257.98	1223.46
ITGAV	2033.97	0.367327	0.0995425	3.69015	0.000224119	0.00217376	1847.55	1892.16	1588.17	2493.45	2239.15	2143.35
BOK	247.762	-0.433003	0.117378	-3.68898	0.000225157	0.0021822	292.731	268.314	293.527	223.998	195.592	212.412
MED9	243.843	-0.426889	0.115844	-3.68505	0.000228659	0.00221122	286.653	277.291	274.554	209.261	213.761	201.54
2021-09-11	3378.17	0.155598	0.0422223	3.68522	0.000228508	0.00221122	3149.14	3241.71	3195.32	3701.86	3562.33	3418.66
NINJ1	359.646	-0.378778	0.102779	-3.68537	0.000228367	0.00221122	445.68	383.021	391.742	330.102	285.371	321.963
EIF4G2	27010	0.110843	0.0300887	3.68387	0.000229723	0.00221986	25655	26493.3	25767.9	28909.5	27768.7	27465.5
LDB1	729.793	-0.269637	0.0732286	-3.68212	0.000231302	0.00223346	783.992	778.011	831.474	618.941	698.999	667.341
DUSP8	136.087	-0.59433	0.161577	-3.67831	0.00023478	0.00226538	176.246	156.6	157.366	100.21	128.257	97.8433
TNKS2	848.579	0.240459	0.0654009	3.67669	0.000236276	0.00227813	772.85	790.977	770.09	938.236	905.279	914.04
BTAF1	655.029	0.286655	0.077993	3.6754	0.000237481	0.00228805	557.1	618.419	595.983	754.519	669.073	735.079
EVI5	663.512	0.299861	0.0816009	3.67473	0.0002381	0.00229232	562.165	655.324	564.733	743.712	772.747	682.394
KIF23	2796.29	0.158217	0.0430738	3.67317	0.000239559	0.00230457	2601.15	2692.12	2633.93	3027.9	2965.94	2856.69
LOC112449100	34.5821	1.20651	0.328482	3.67299	0.000239725	0.00230457	19.2453	19.949	23.4375	38.3154	63.0596	43.4859
C1S	8.19872	3.07562	0.837944	3.67043	0.00024214	0.00232608	0	1.9949	3.34822	11.7894	12.8257	19.2342
FGFR2	1028.36	-0.235423	0.0641691	-3.66879	0.000243699	0.00233883	1107.11	1178.99	1047.99	932.341	977.958	925.748
RLF	379.718	0.362567	0.0988282	3.66866	0.000243826	0.00233883	322.105	331.153	342.634	454.873	440.348	387.192
TRIM47	530.594	-0.317234	0.0865169	-3.66673	0.000245673	0.00234985	644.21	553.584	569.197	458.802	458.518	499.252
MBD2	3394.27	0.170717	0.0465551	3.667	0.000245415	0.00234985	3195.73	3273.63	3108.26	3410.07	3833.81	3544.1
RNGTT	560.253	0.29139	0.0794691	3.66671	0.000245695	0.00234985	519.623	508.699	483.26	627.783	597.463	624.692
WDR44	574.328	0.294833	0.0804006	3.66705	0.000245369	0.00234985	495.313	518.674	534.599	663.151	595.325	638.908
PIK3CA	538.414	0.338971	0.0924569	3.66626	0.000246124	0.00235223	442.641	552.587	429.688	607.152	611.357	587.06
CBX2	456.97	-0.327106	0.0892612	-3.66459	0.000247731	0.00236586	501.39	479.773	544.644	421.469	404.009	390.537
ATP5F1D	2248.13	-0.192577	0.052577	-3.66277	0.000249503	0.00238104	2550.51	2343.01	2302.46	2116.19	1984.77	2191.86
SGMS2	77.5419	0.800792	0.218742	3.66089	0.00025134	0.00239682	44.568	60.8444	64.7322	111.016	81.2293	102.861
ZCCHC8	495.674	0.309794	0.0846751	3.65862	0.000253573	0.00241635	439.603	446.857	441.965	516.767	556.848	572.007
SHROOM2	232.008	-0.449617	0.122965	-3.65646	0.000255718	0.00243501	289.692	239.388	274.554	202.384	194.523	191.505
C18H19orf12	287.357	0.393275	0.107599	3.655	0.000257178	0.00244535	242.085	258.339	244.42	329.119	332.399	317.782
DNPEP	1434.88	0.196861	0.053858	3.65519	0.000256993	0.00244535	1377.56	1289.7	1344.87	1558.16	1502.74	1536.22
AGAP3	407.445	-0.333888	0.0913839	-3.65369	0.000258502	0.00245614	455.809	435.885	472.099	357.61	356.981	366.285
TRIM32	156.573	-0.527076	0.144328	-3.65193	0.000260273	0.00247118	192.453	184.528	177.456	135.578	123.982	125.44
JRKL	270.224	0.421571	0.115509	3.64969	0.000262553	0.00248995	253.227	237.393	202.009	311.435	300.335	316.945
TMEM30A	509.361	0.322648	0.0884059	3.64962	0.000262632	0.00248995	451.758	473.788	430.804	614.029	566.467	519.322
CDC42EP2	49.5409	-0.988481	0.270908	-3.64877	0.000263496	0.00249632	75.9682	58.8495	62.5001	24.5612	42.7522	32.6144
ALDOA	9394.73	-0.120502	0.0330427	-3.64687	0.000265454	0.00251306	10065.3	9453.83	9842.65	8959.91	8998.28	9048.41
LRRC8E	256.961	-0.416016	0.114086	-3.64652	0.000265813	0.00251463	309.95	284.273	286.831	229.892	215.899	214.921
USP31	749.641	0.267954	0.073543	3.64349	0.000268961	0.00254257	667.507	701.207	671.876	884.202	772.747	800.308
CDK8	670.785	0.264507	0.0726293	3.64187	0.000270661	0.00255679	616.862	600.465	610.492	743.712	740.683	712.5
RASIP1	75.9293	0.775942	0.213074	3.64165	0.000270893	0.00255713	54.6971	64.8342	47.9911	105.122	95.1237	87.8081
IRAK4	792.193	0.24609	0.0676689	3.63667	0.000276184	0.00260519	713.088	733.125	727.68	882.237	858.251	838.776
L3MBTL2	1817.01	-0.177446	0.0487984	-3.6363	0.000276584	0.00260708	1877.93	1953.01	1956.48	1685.88	1687.64	1741.11
TMEM242	269.429	0.405461	0.111631	3.63215	0.000281071	0.00264746	238.034	226.421	231.027	324.207	294.99	301.893
TMTC2	87.9159	0.726581	0.200216	3.62899	0.000284535	0.00267816	54.6971	72.8138	71.4287	96.2797	114.362	117.914
PTPRE	354.331	0.35924	0.0990339	3.62745	0.00028624	0.00269226	290.705	322.176	318.081	409.68	404.009	381.338
SMAP1	725.222	0.281969	0.0777555	3.62635	0.000287453	0.00270172	708.024	598.47	656.251	774.168	847.563	766.857
ZBTB10	562.565	0.296999	0.0819045	3.62616	0.000287672	0.00270184	509.493	517.676	485.492	627.783	656.247	578.697
DPY19L3	313.912	0.384716	0.106202	3.62251	0.000291759	0.00273826	273.486	293.25	250	341.891	352.706	372.139
FYCO1	1071.71	0.220412	0.0609284	3.61757	0.000297385	0.00278804	998.729	972.513	998.885	1209.39	1120.11	1130.63
GPR137B	635.971	-0.296633	0.0819999	-3.61748	0.000297491	0.00278804	731.321	726.143	643.974	617.959	565.398	531.03
MAN1A1	155.555	0.554581	0.153347	3.61651	0.000298598	0.00279642	134.717	139.643	102.679	193.542	191.316	171.435
SMG1	1495.43	0.408105	0.112886	3.61521	0.00030011	0.00280856	1208.4	1402.41	1244.42	1922.65	1634.2	1560.48
DLAT	1499.88	0.1955	0.0540988	3.61375	0.000301803	0.00282238	1421.11	1434.33	1337.06	1594.51	1653.44	1558.8
CLIC1	6291.11	0.11889	0.0329031	3.61332	0.000302296	0.00282496	6107.84	6025.59	5962.06	6617.76	6500.48	6532.92
SENP5	212.641	0.485236	0.134343	3.61193	0.000303926	0.00283816	155.988	208.467	166.295	250.524	262.926	231.646
USP53	159.542	0.536586	0.148639	3.61	0.000306195	0.00285731	125.601	134.656	130.581	213.191	166.734	186.488
CDC6	403.809	-0.329062	0.0911851	-3.60873	0.000307705	0.00286751	456.822	439.875	452.01	365.47	359.119	349.56
CREBRF	28.7484	1.25143	0.346781	3.60871	0.000307727	0.00286751	14.1807	18.9515	17.8572	40.2803	42.7522	38.4683
RALGAPB	1272.8	0.218415	0.060529	3.60844	0.000308049	0.00286846	1108.12	1185.97	1235.49	1429.46	1372.35	1305.41
CRK	2074.11	0.176213	0.0488455	3.60757	0.000309082	0.00287603	1916.42	2032.8	1890.63	2225.24	2248.77	2130.81
CALCOCO2	722.291	0.272969	0.0757106	3.60543	0.000311636	0.00289773	608.759	681.258	672.992	842.939	749.233	778.565
EFR3A	1428.33	0.193502	0.0537258	3.60166	0.000316189	0.00293797	1353.25	1347.55	1295.76	1565.04	1519.84	1488.56
HDAC4	202.344	0.490301	0.136178	3.60043	0.00031769	0.00294982	185.362	174.554	145.089	240.699	211.624	256.734
CD14	7.92013	3.02848	0.841246	3.6	0.00031822	0.00295264	0	2.99235	2.23215	15.7191	10.6881	15.8891
CRACR2A	9.35935	2.54226	0.706313	3.59934	0.000319022	0.00295797	3.03873	3.9898	1.11607	15.7191	13.8945	18.3979
KDSR	628.466	-0.275576	0.0765953	-3.59781	0.000320903	0.00297331	687.765	709.187	666.296	589.468	580.362	537.72
LOC786065	140.277	0.565108	0.157158	3.59578	0.000323418	0.00299449	108.381	112.712	118.304	147.367	185.972	168.926
TGFB1	1171.75	-0.225807	0.0628126	-3.59493	0.000324481	0.00300219	1338.05	1175.99	1276.79	1118.02	1037.81	1083.8
ARF3	2342	0.170656	0.0474916	3.59339	0.000326409	0.00301789	2272.97	2106.61	2232.15	2567.13	2418.71	2454.44
FTL	8757.58	-0.117565	0.0327241	-3.59261	0.000327382	0.00302317	9370.42	9008.96	8964.3	8298.72	8358.06	8544.98
DDX21	4929.2	0.145141	0.0404004	3.59256	0.000327442	0.00302317	4501.37	4916.43	4623.89	5264.93	5220.05	5048.55
MRPL2	623.192	-0.271088	0.0755275	-3.58926	0.000331624	0.00305961	668.52	666.296	709.822	565.889	575.018	553.609
SIX5	54.0718	-0.960414	0.267824	-3.58598	0.000335813	0.00309607	73.9424	54.8597	85.9376	46.175	26.7202	36.7958
FOXS1	7.08537	3.67381	1.02503	3.58412	0.000338221	0.00311608	0	1.9949	1.11607	13.7542	6.41284	19.2342
PRRC2C	5134.63	0.180279	0.0503218	3.58252	0.000340294	0.00313296	4355.51	5065.05	5024.56	5606.82	5233.94	5521.87
CCDC86	1375.78	0.203837	0.0569168	3.58131	0.000341877	0.00314341	1325.9	1236.84	1275.67	1449.11	1422.58	1544.59
ABCB1	384.294	0.346308	0.0966994	3.58128	0.000341911	0.00314341	350.467	344.12	319.197	420.487	461.724	409.771
SLC43A2	236.308	-0.4344	0.12141	-3.57795	0.000346297	0.0031815	292.731	262.329	258.929	191.577	219.105	193.178
PELO	539.62	0.302221	0.0844791	3.57747	0.000346942	0.00318518	442.641	511.692	496.653	599.292	568.605	618.838
2021-03-09	401.631	-0.368486	0.103023	-3.57674	0.000347907	0.0031918	491.261	397.982	468.751	316.348	378.357	357.086
LOC511937	5014.34	0.137316	0.0384022	3.57572	0.000349269	0.00320204	4640.14	4804.71	4885.05	5422.12	5086.45	5247.58
HECTD1	2807.28	0.181156	0.050668	3.57536	0.000349751	0.00320421	2498.85	2815.8	2578.13	3135.97	2892.19	2922.75
TNFRSF11B	7.27647	3.23574	0.905295	3.57424	0.000351246	0.00321565	1.01291	0.997449	2.23215	15.7191	12.8257	10.8715
TNFRSF21	292.756	0.417758	0.116953	3.57201	0.000354248	0.00324086	245.124	215.449	292.411	349.751	325.986	327.817
UTP20	1893.34	0.1908	0.053431	3.57096	0.000355676	0.00325164	1675.35	1836.3	1793.53	2129.94	1946.3	1978.61
SPDYA	9.53339	2.53913	0.711791	3.56724	0.000360765	0.00329586	4.05164	0.997449	3.34822	15.7191	21.3761	11.7077
LEKR1	26.4786	1.29704	0.363619	3.56702	0.000361062	0.00329627	16.2065	11.9694	17.8572	37.333	39.5458	35.9595
ATAD5	481.106	0.309564	0.0868443	3.56458	0.000364437	0.00332475	419.344	448.852	420.76	565.889	506.614	525.176
TIPARP	1217.18	0.204904	0.0575023	3.5634	0.00036608	0.00333741	1118.25	1169.01	1106.03	1311.57	1264.4	1333.85
PI4KB	966.583	-0.221294	0.0621165	-3.56256	0.000367253	0.00334577	1059.5	1030.37	1032.37	869.465	894.591	913.204
FAM118A	459.359	-0.35936	0.100898	-3.56162	0.00036857	0.00335542	518.61	471.794	559.153	341.891	438.21	426.496
METTL21A	420.362	0.32804	0.0921152	3.5612	0.000369168	0.00335853	371.738	394.99	350.447	484.346	472.412	448.239
KATNB1	768.239	-0.248102	0.0696933	-3.55991	0.000370987	0.00337273	844.766	800.952	858.26	690.66	687.242	727.553
NEDD4L	5438.05	0.122977	0.0345516	3.55922	0.000371962	0.00337924	5309.67	5097.96	5212.06	5666.75	5663.6	5678.26
GMCL1	1809.45	0.185574	0.052155	3.55811	0.000373526	0.00339108	1684.47	1671.73	1722.1	2025.8	1927.06	1825.57
HHIPL1	2000.21	-0.186794	0.0525129	-3.55711	0.00037496	0.00340174	2261.83	2022.83	2104.91	1928.54	1799.87	1883.27
LSM2	668.113	-0.272209	0.076568	-3.55513	0.000377787	0.00342501	768.798	732.128	689.733	613.046	633.802	571.171
PRKAB2	318.794	0.377754	0.106293	3.55389	0.000379571	0.0034388	279.563	291.255	260.045	336.979	391.183	353.741
PKN2	760.122	0.271945	0.0765457	3.55272	0.000381271	0.0034518	708.024	740.108	616.072	871.43	819.774	805.326
SLC35E4	125.193	-0.596104	0.167855	-3.5513	0.000383332	0.00346805	166.117	154.605	131.697	105.122	86.5733	107.042
UBE2S	3272.32	-0.17791	0.0501168	-3.5499	0.000385374	0.00348411	3749.79	3260.66	3409.6	3177.23	3057.85	2978.78
NXN	2661.72	0.158577	0.0446826	3.54897	0.000386741	0.00349406	2555.57	2394.88	2598.22	2795.06	2799.2	2827.42
BMPR2	776.523	0.274656	0.077397	3.54867	0.000387185	0.00349564	694.856	704.199	707.59	927.429	865.733	759.331
LOC781663	6.77994	3.58342	1.00985	3.54845	0.000387498	0.00349605	2.02582	0	1.11607	12.7718	13.8945	10.8715
B4GALT4	210.309	0.459565	0.129747	3.54201	0.000397085	0.00357741	183.337	195.5	151.786	241.682	243.688	245.863
YAP1	1429.44	0.228637	0.0645532	3.54185	0.000397338	0.00357741	1346.16	1324.61	1274.56	1503.14	1709.02	1419.15
TMEM131L	669.104	-0.259791	0.0733462	-3.54199	0.000397117	0.00357741	748.54	714.174	724.331	632.695	602.807	592.077
MAF1	1422.86	-0.197201	0.0557617	-3.5365	0.000405469	0.00364811	1585.2	1475.23	1498.89	1383.28	1297.53	1297.05
TTC9C	273.592	0.416543	0.11785	3.53452	0.000408523	0.00367305	207.646	269.311	225.447	321.26	318.504	299.384
SEMA4D	2043.81	0.18084	0.0511722	3.53394	0.000409409	0.00367849	2016.7	1863.24	1869.42	2196.75	2071.35	2245.38
DYNC1H1	10001.9	0.151245	0.0428036	3.53346	0.000410158	0.00368015	9088.84	9731.12	9617.2	11136	9835.15	10603
FMNL3	2424.81	0.157797	0.0446572	3.53351	0.000410074	0.00368015	2240.56	2291.14	2347.1	2611.34	2491.39	2567.34
RPL36	4028.25	-0.144933	0.0410434	-3.5312	0.000413681	0.0037092	4376.78	4033.69	4282.37	3891.47	3752.58	3832.61
TMEM87A	763.641	0.244155	0.0691517	3.53071	0.00041444	0.00371346	719.166	709.187	668.528	818.378	833.669	832.922
MFAP3	360.434	0.341312	0.0967026	3.5295	0.000416348	0.003728	305.899	332.151	315.849	398.873	405.078	404.753
LGALS9	18.9989	1.55552	0.440854	3.52843	0.000418037	0.00374056	8.10327	12.9668	7.81251	25.5436	27.789	31.7782
POLDIP2	1046.15	-0.2184	0.0619442	-3.52576	0.000422265	0.0037758	1139.52	1084.23	1154.02	947.078	942.687	1009.37
UGGT1	2196.29	0.187404	0.0531659	3.52488	0.000423668	0.00378576	2017.72	2170.45	1972.1	2491.48	2241.29	2284.68
TOR1AIP2	1746	0.198198	0.0562487	3.52361	0.000425713	0.00379885	1615.59	1756.51	1504.47	1894.16	1855.45	1849.82
MSN	5724.2	0.120859	0.0342999	3.52361	0.000425715	0.00379885	5448.44	5434.1	5571.44	6075.45	5927.6	5888.16
ZDHHC20	1251.68	0.24378	0.0692201	3.52181	0.000428606	0.00382203	1168.9	1226.86	1039.06	1432.41	1400.14	1242.69
MAK16	1243.73	0.202621	0.0575653	3.51984	0.000431814	0.00384801	1112.17	1187.96	1169.64	1376.41	1300.74	1315.45
SH3GLB1	1274.59	0.207981	0.0591047	3.51886	0.000433406	0.00385956	1195.23	1176.99	1178.57	1404.9	1271.88	1419.98
CDR2L	566.209	-0.296125	0.0841773	-3.51787	0.000435032	0.0038714	650.288	577.523	646.206	476.486	502.339	544.41
WLS	1234.63	0.196728	0.0560015	3.5129	0.000443243	0.00394178	1138.51	1164.02	1149.56	1344.97	1291.12	1319.63
SNX30	340.162	-0.368202	0.104834	-3.51223	0.000444369	0.00394911	342.363	398.98	409.599	307.506	278.958	303.565
MOB1A	702.107	0.270595	0.0770607	3.51146	0.000445661	0.0039552	615.849	683.253	610.492	810.518	713.962	778.565
SLC16A6	246.962	0.418163	0.119081	3.51159	0.000445442	0.0039552	211.698	233.403	188.616	283.927	278.958	285.167
SEPSECS	251.721	0.431949	0.123141	3.50776	0.000451893	0.00400779	198.53	233.403	209.822	279.997	325.986	262.588
TRIM24	388.082	0.335077	0.0955432	3.50707	0.000453066	0.00401547	365.66	325.169	338.17	446.031	440.348	413.116
STK38L	267.019	0.401546	0.114668	3.50182	0.000462087	0.00409263	207.646	251.357	231.027	311.435	304.61	296.039
TUBB4B	8113.2	-0.108648	0.0310316	-3.50119	0.000463186	0.00409959	8392.97	8398.52	8466.53	7735.78	7765.94	7919.45
NR3C1	779.187	0.247094	0.0706439	3.49774	0.000469211	0.0041501	708.024	735.12	694.197	897.956	814.43	825.396
FAM192A	644.915	0.285463	0.0816682	3.49541	0.000473342	0.0041838	625.978	528.648	589.287	662.169	749.233	714.172
BCL2A1	11.1336	2.27723	0.652284	3.49116	0.000480926	0.00424796	4.05164	2.99235	4.46429	27.5085	8.55045	19.2342
SLC6A17	939.671	-0.226237	0.064864	-3.48787	0.000486893	0.00429776	1024.05	999.444	1014.51	906.798	875.352	817.87
RPS5	7952.3	-0.119295	0.0342057	-3.48758	0.00048742	0.00429951	8573.26	8060.39	8208.72	7519.64	7693.27	7658.54
MAP3K9	182.172	-0.471395	0.135284	-3.48449	0.000493078	0.00434648	200.556	218.441	216.518	161.121	140.014	156.382
PCBP1	6340.64	-0.12112	0.034762	-3.48426	0.000493509	0.00434734	6582.9	6614.09	6627.24	6076.43	5891.26	6251.94
LPCAT3	754.667	-0.242175	0.0695214	-3.48347	0.000494963	0.00435721	831.599	782	840.403	690.66	692.586	690.757
NR2F6	346.238	-0.356185	0.10226	-3.48314	0.000495567	0.00435959	386.931	404.964	372.768	294.734	334.536	283.495
STYX	338.085	0.362523	0.104159	3.48048	0.00050051	0.00440011	265.382	327.163	294.643	377.259	386.908	377.157
ASCL4	12.3223	2.01136	0.578576	3.4764	0.000508188	0.0044646	4.05164	2.99235	7.81251	23.5787	17.1009	18.3979
SLC30A7	496.705	0.348939	0.100404	3.47535	0.000510188	0.00447916	442.641	432.893	433.036	529.539	656.247	485.871
PTDSS1	4258.33	-0.141113	0.040611	-3.47476	0.000511316	0.00448605	4384.88	4440.65	4571.44	3949.43	4246.37	3957.22
ABHD8	518.357	-0.293497	0.0845019	-3.47327	0.000514166	0.00450801	604.707	533.635	574.778	446.031	473.481	477.509
CASC4	1092.91	0.212423	0.0611715	3.47259	0.000515459	0.00451632	987.587	1057.3	991.073	1202.51	1191.72	1127.29
CEMIP	578.995	0.273682	0.0788209	3.47221	0.000516201	0.00451979	505.442	532.638	534.599	663.151	620.976	617.165
SRPK1	1969.33	0.171299	0.0493387	3.47189	0.000516802	0.00452201	1806.02	1944.03	1805.81	2057.24	2132.27	2070.6
FAM107B	298.511	-0.379324	0.109324	-3.46971	0.000521018	0.00455585	342.363	354.095	314.733	274.103	268.27	237.5
SPHK1	1701.06	-0.174538	0.0503236	-3.46832	0.000523731	0.00457651	1838.43	1747.53	1824.78	1585.67	1635.27	1574.69
ARG2	356.771	0.348105	0.100381	3.46785	0.00052464	0.00457832	312.989	328.161	301.34	383.154	382.633	432.35
POLR3A	887.607	0.23091	0.0665853	3.46789	0.000524567	0.00457832	782.979	796.962	871.653	946.096	958.719	969.234
IER2	805.351	0.241065	0.0695686	3.46514	0.000529947	0.00462155	727.269	702.204	785.715	891.079	875.352	850.484
LMCD1	134.005	-0.543813	0.157051	-3.46266	0.000534867	0.00466134	173.208	147.623	156.25	106.104	107.949	112.896
RRM2B	225.133	0.439453	0.126921	3.4624	0.000535378	0.00466268	167.13	218.441	187.5	259.366	260.789	257.57
SRM	1050.97	-0.222531	0.0642778	-3.46202	0.000536138	0.00466619	1160.79	1120.14	1113.84	898.938	1030.33	981.778
INO80D	212.645	0.428371	0.123769	3.46105	0.000538075	0.00467992	184.35	176.549	183.036	249.541	241.55	240.845
LPCAT1	2530.06	-0.168008	0.048554	-3.46023	0.000539705	0.00468786	2847.29	2633.27	2551.34	2402.08	2320.38	2426.01
STEAP1	401.975	-0.329228	0.0951434	-3.46034	0.000539497	0.00468786	414.28	454.837	473.215	360.558	371.945	337.016
TUBA4A	2126.22	-0.160097	0.0462816	-3.4592	0.000541788	0.00470282	2251.7	2252.24	2228.8	1940.33	2032.87	2051.36
CAB39	1310.67	0.209344	0.0605488	3.45744	0.000545324	0.00473037	1180.04	1303.67	1160.72	1400.97	1466.4	1352.24
MBNL1	2239.06	0.173101	0.050084	3.45621	0.000547834	0.00474876	2051.14	2182.42	2079.24	2509.17	2338.55	2273.81
TUBA1C	4543.54	0.135771	0.039285	3.45604	0.000548172	0.00474876	4330.19	4176.32	4485.5	4632.23	4819.25	4817.74
DBN1	2759.92	-0.154966	0.0448441	-3.45567	0.000548921	0.00474895	3001.25	2758.95	2965.41	2610.36	2591.85	2631.73
RPS15	6969.94	-0.118092	0.0341732	-3.45569	0.000548882	0.00474895	7425.64	7125.78	7216.53	6618.74	6588.12	6844.85
ZNF106	1470.71	0.197169	0.0571303	3.45122	0.000558057	0.0048216	1357.3	1427.35	1325.89	1666.23	1499.53	1547.93
HIPK3	1042.95	0.232753	0.0674381	3.45136	0.000557777	0.0048216	980.496	1025.38	868.305	1144.55	1154.31	1084.64
GRK5	130.877	-0.562563	0.163069	-3.44984	0.000560917	0.0048431	137.756	161.587	168.527	114.946	107.949	94.4982
ITGA3	13395.7	-0.104285	0.0302606	-3.44624	0.000568438	0.00490479	13838.4	13641.1	14163	13092.1	12671.8	12968
DOPEY1	290.414	0.388395	0.112752	3.44468	0.000571726	0.00492991	241.072	244.375	268.974	360.558	328.123	299.384
CTDSP1	1143.46	0.205302	0.0596141	3.44384	0.00057351	0.00493877	1090.9	1054.3	1040.18	1180.9	1279.36	1215.1
GNG12	181.548	0.476884	0.138474	3.44386	0.00057348	0.00493877	147.885	161.587	146.206	228.91	188.11	216.593
MCMBP	1949.93	0.176521	0.0512606	3.4436	0.000574035	0.00494003	1800.95	1926.07	1763.4	2152.54	2040.35	2016.24
CHPF2	324.344	-0.363435	0.105566	-3.44272	0.000575894	0.00495277	375.789	330.156	389.509	297.681	273.614	279.313
RIF1	798.405	0.261165	0.0758733	3.44213	0.000577159	0.00496037	750.566	757.064	668.528	917.605	898.866	797.799
IL18RAP	77.9118	0.722277	0.209918	3.44076	0.000580092	0.0049823	50.6455	56.8546	69.1965	88.4202	103.674	98.6796
FAM193B	295.612	-0.375967	0.109331	-3.43878	0.000584343	0.00501552	329.196	314.197	359.376	240.699	257.582	272.623
CLCN2	24.6074	1.34224	0.390612	3.43626	0.0005898	0.00505903	12.1549	12.9668	16.7411	24.5612	42.7522	38.4683
PDPN	3189.37	0.180203	0.0524788	3.43382	0.000595131	0.0051014	2938.45	3056.19	2979.92	3575.12	3059.99	3526.54
NSMAF	2245.88	0.162667	0.0473772	3.43345	0.000595949	0.00510506	2049.12	2075.69	2235.49	2371.63	2364.2	2379.18
TICRR	813.411	0.234667	0.0683679	3.43241	0.000598236	0.00512129	704.985	768.036	770.09	884.202	862.527	890.625
TMEM64	801.175	-0.272281	0.0793765	-3.43024	0.000603037	0.00515901	896.425	964.534	766.742	753.536	722.513	703.301
NUDT21	803.971	0.232927	0.0679607	3.42737	0.000609454	0.00521049	718.153	743.1	756.698	900.903	848.632	856.338
SPSB3	240.876	-0.401814	0.117249	-3.42701	0.000610271	0.00521066	281.589	275.296	265.625	195.507	214.83	212.412
LOC112444616	58.6241	0.817379	0.238506	3.42707	0.000610121	0.00521066	41.5293	36.9056	49.1072	76.6308	74.8164	72.7553
CST6	436.139	-0.311236	0.0908239	-3.42681	0.000610715	0.00521104	503.416	460.822	485.492	410.663	363.394	393.046
MTA2	3246.69	-0.14079	0.0411044	-3.42519	0.000614379	0.00523888	3478.33	3309.54	3429.69	3065.23	3035.41	3161.93
ANKRD28	1117.77	0.200977	0.0587551	3.42059	0.000624862	0.00532135	1052.41	1044.33	1022.32	1229.04	1192.79	1165.76
TEX264	837.297	-0.245556	0.0717878	-3.42058	0.000624866	0.00532135	987.587	852.819	885.046	737.817	772.747	787.764
EZR	14842.8	-0.0938722	0.0274554	-3.41908	0.000628342	0.00534746	15288.9	15318.8	15368.3	14445.9	14357.3	14277.6
DCBLD2	18863.6	0.126838	0.0371234	3.41665	0.000633969	0.00539184	18159.4	18271.3	17668.6	20676.6	19814.6	18591.1
PARD3	1984.08	0.168193	0.0492354	3.41609	0.000635263	0.00539644	1799.94	1946.02	1858.26	2148.61	2104.48	2047.18
POR	892.492	-0.22158	0.0648642	-3.41606	0.000635338	0.00539644	971.38	930.62	979.912	826.237	846.494	800.308
RTL4	93.473	0.659003	0.192938	3.41563	0.000636346	0.00540149	83.0586	75.8062	58.0358	110.034	121.844	112.06
APC	1296.6	0.198153	0.0580207	3.41522	0.000637304	0.00540611	1182.07	1236.84	1204.24	1464.83	1328.53	1363.12
VAX2	275.214	-0.393164	0.115165	-3.41393	0.00064033	0.00542473	346.415	290.258	301.34	224.98	234.069	254.225
LOC101906730	6.75808	3.12893	0.916517	3.41393	0.000640328	0.00542473	2.02582	0.997449	1.11607	10.8069	13.8945	11.7077
RAB43	891.176	-0.232661	0.0681634	-3.41328	0.00064186	0.00543416	985.561	901.694	1002.23	779.08	842.219	836.267
VPS13C	575.026	0.308996	0.0905732	3.41156	0.000645922	0.00546501	501.39	560.567	477.679	714.238	609.219	587.06
LOC104973964	9.27656	2.51287	0.737136	3.40897	0.000652089	0.00551005	6.07746	0.997449	1.11607	10.8069	22.4449	14.2165
TYSND1	141.968	-0.536214	0.15729	-3.40907	0.000651848	0.00551005	185.362	165.577	152.902	101.192	127.188	119.586
FMR1	889.899	0.228875	0.0671464	3.40859	0.000652989	0.00551409	790.069	861.796	804.689	973.604	991.852	917.385
PDE7A	131.524	0.538378	0.158025	3.40691	0.000657029	0.00554103	107.368	110.717	103.795	145.402	157.114	164.745
TIMM22	199.885	-0.453749	0.133179	-3.40706	0.000656663	0.00554103	250.189	208.467	235.491	164.069	157.114	183.979
TMEM41B	813.51	0.271103	0.0796012	3.40577	0.000659782	0.00556066	724.23	757.064	727.68	870.447	1004.68	796.963
GAPDH	50494.9	-0.092507	0.0271758	-3.40403	0.000663999	0.00559259	52622.7	51031.5	52689.8	48331.4	48608.2	49686
P2RY14	38.001	1.04515	0.307105	3.40322	0.00066596	0.00560549	24.3098	31.9184	17.8572	45.1925	57.7155	51.0123
LOC107131356	197.067	0.448627	0.131836	3.40292	0.000666693	0.00560804	173.208	169.566	157.366	208.279	229.793	244.19
RPLP1	10593.5	-0.118892	0.0349455	-3.40219	0.00066847	0.00561937	11302	10654.8	11137.3	10231.2	9820.19	10415.7
NFIX	54.2793	0.847882	0.249245	3.4018	0.000669424	0.00562377	43.5551	37.9031	34.5983	63.859	78.0228	67.7377
CCNF	1344.79	-0.188791	0.0555491	-3.39863	0.000677252	0.00568587	1430.23	1428.35	1439.73	1195.64	1291.12	1283.67
PEX13	188.387	0.470914	0.138589	3.39792	0.000679012	0.00569698	171.182	148.62	154.018	246.594	196.66	213.248
RIC8B	381.275	0.329922	0.0972351	3.39304	0.000691223	0.0057957	306.912	343.123	363.84	429.329	429.66	414.789
FSCN1	1134.72	-0.201272	0.0593341	-3.39219	0.000693362	0.00580991	1224.61	1164.02	1252.23	1055.15	1079.49	1032.79
FNIP1	340.582	0.342572	0.101013	3.39138	0.000695411	0.00582334	300.834	317.189	282.366	399.856	371.945	371.303
PIK3R2	377.334	-0.32273	0.095243	-3.38849	0.000702787	0.00588133	429.474	395.987	433.036	342.874	328.123	334.507
WASL	585.81	0.273457	0.0807311	3.38726	0.000705952	0.00590404	532.79	510.694	546.876	665.116	664.797	594.586
LOC100847773	276.937	0.373447	0.110275	3.3865	0.000707892	0.00591647	247.15	237.393	239.956	304.558	301.403	331.162
USP25	417.031	0.321592	0.0949915	3.38548	0.000710537	0.00593478	361.609	391	358.259	495.153	471.343	424.824
KPNA4	717.151	0.259877	0.0767856	3.38445	0.00071322	0.00595338	660.417	679.263	618.304	845.886	724.651	774.384
TMEM165	1209.1	0.216	0.0638511	3.38287	0.000717323	0.0059838	1053.43	1080.24	1223.22	1324.34	1323.18	1250.22
R3HCC1L	344.827	0.338384	0.100103	3.38036	0.000723911	0.0060349	295.77	308.212	309.152	371.365	411.49	372.975
WDR59	181.693	0.461854	0.136639	3.38011	0.000724562	0.00603647	169.156	139.643	149.554	208.279	216.968	206.558
ABCA5	246.661	0.398241	0.117872	3.37859	0.000728597	0.00606622	198.53	214.452	225.447	268.208	298.197	275.132
PRSS35	216.669	-0.420724	0.124646	-3.37535	0.000737215	0.00613406	236.008	262.329	245.536	198.454	179.559	178.125
RNF150	2294.01	0.151711	0.0449542	3.37478	0.000738738	0.00614282	2139.26	2213.34	2166.3	2455.13	2432.6	2357.44
CDH1	168.99	0.513178	0.152078	3.37443	0.000739687	0.00614679	131.678	171.561	113.839	201.401	195.592	199.868
C7H5orf30	325.229	0.347901	0.103224	3.37034	0.000750751	0.00623476	271.46	293.25	294.643	377.259	340.949	373.812
PCYT1A	604.252	0.261738	0.0776678	3.36997	0.000751763	0.00623921	525.7	576.526	545.76	646.45	682.967	648.107
RSRP1	168.722	0.510705	0.151648	3.36769	0.000758009	0.00628704	138.769	114.707	165.179	184.7	192.385	216.593
WDHD1	1055.98	0.211242	0.0627406	3.36692	0.000760139	0.00630071	991.638	1018.4	925.225	1179.92	1105.15	1115.58
YARS2	617.793	0.263095	0.0781964	3.36455	0.000766696	0.00635102	601.668	539.62	542.412	679.853	692.586	650.616
DDR1	2247.12	-0.185137	0.0550368	-3.36389	0.000768535	0.0063585	2504.92	2249.25	2421.88	2213.45	1947.36	2145.86
LRRC8C	501.209	0.28159	0.0837101	3.36387	0.000768573	0.0063585	464.925	447.855	445.313	552.135	525.853	571.171
SORBS3	845.007	0.224425	0.0667528	3.36203	0.000773718	0.00639702	819.444	752.077	766.742	912.693	904.21	914.877
SDHAF1	185.582	-0.451824	0.134416	-3.36138	0.000775549	0.0064081	204.608	209.464	229.911	148.349	153.908	167.253
AKAP13	451.499	0.327004	0.097323	3.35999	0.000779463	0.00643636	387.944	396.985	418.527	539.363	431.798	534.375
FAM120A	2692.02	0.152887	0.0455086	3.35951	0.000780805	0.00644337	2496.82	2542.5	2610.49	2968.95	2731.87	2801.5
PXK	338.974	0.35001	0.104205	3.35887	0.000782617	0.00645424	307.924	275.296	311.384	412.627	356.981	369.63
TMPO	4844.07	0.14845	0.044203	3.35838	0.000784018	0.00646172	4566.2	4875.53	4340.41	5284.58	5012.7	4984.99
PXN	816.556	-0.226188	0.0673962	-3.3561	0.000790512	0.00650702	904.528	873.766	863.841	765.326	722.513	769.366
SHB	994.757	0.206685	0.0615826	3.35623	0.000790136	0.00650702	952.135	904.687	914.064	1045.32	1075.22	1077.11
BAHD1	738.674	-0.243893	0.0726999	-3.35479	0.000794265	0.0065338	758.669	788.983	856.028	655.292	691.518	681.558
SCAF11	2176.45	0.186928	0.0557646	3.3521	0.000802018	0.00659342	2023.79	2136.54	1945.32	2512.12	2196.4	2244.54
BICC1	4334.41	0.132815	0.0396712	3.3479	0.000814249	0.00668976	4173.19	4183.3	4045.76	4717.71	4498.6	4387.9
PTPN2	1083.25	0.19623	0.0586386	3.34643	0.000818586	0.00672116	1021.01	1013.41	994.421	1155.36	1155.38	1159.9
C19H17orf58	123.29	0.554252	0.165732	3.34427	0.000824985	0.00676944	91.1618	107.725	100.447	138.525	161.39	140.493
ATR	343.712	0.343609	0.102797	3.3426	0.000829981	0.00680615	327.17	312.202	268.974	386.101	377.289	390.537
TMEM233	168.08	0.472459	0.141434	3.3405	0.000836282	0.00684996	150.923	141.638	129.464	208.279	189.179	188.996
ZBTB7C	153.378	0.513162	0.15362	3.34047	0.000836372	0.00684996	140.794	102.737	136.161	178.805	175.284	186.488
FBH1	790.434	0.236047	0.0707102	3.33823	0.00084315	0.00690115	703.972	708.189	767.858	856.693	814.43	891.461
CDC5L	1183.91	0.206059	0.0617456	3.33723	0.000846171	0.00692153	1064.57	1133.1	1101.56	1348.9	1191.72	1263.6
BLCAP	694.338	-0.247115	0.0740658	-3.33642	0.000848644	0.00693741	741.45	756.067	765.626	632.695	595.325	674.868
CFAP54	45.153	0.928816	0.278535	3.33465	0.000854066	0.00697736	32.4131	30.9209	30.134	68.7712	45.9587	62.7201
UFL1	383.055	0.310851	0.0932759	3.3326	0.000860381	0.00702456	337.299	348.11	340.402	429.329	420.041	423.151
KIF2A	633.144	0.259962	0.0780336	3.33142	0.000864047	0.00704568	579.384	589.493	559.153	743.712	664.797	662.324
MEPCE	914.308	-0.216023	0.0648433	-3.33147	0.000863885	0.00704568	1004.81	971.516	973.216	846.869	808.017	881.426
TMF1	370.369	0.333126	0.10005	3.3296	0.000869696	0.00708731	312.989	339.133	331.474	452.908	382.633	403.081
CIPC	363.312	-0.332688	0.0999484	-3.32859	0.000872854	0.00710861	370.725	432.893	410.715	328.137	331.33	306.074
ZNF543	229.87	0.398971	0.119905	3.32739	0.000876639	0.00713499	186.375	206.472	202.009	258.383	265.064	260.915
PDE4B	349.541	0.334031	0.100467	3.32477	0.000884921	0.00719791	315.015	310.207	301.34	402.803	408.284	359.595
STX6	743.705	-0.247777	0.0745928	-3.32173	0.00089462	0.00726922	799.185	822.896	797.992	727.993	693.655	620.51
SNX10	477.47	0.330486	0.099494	3.32167	0.000894801	0.00726922	440.616	474.786	351.563	550.17	545.091	502.597
BCAR1	1345.68	0.189579	0.0570886	3.32079	0.000897618	0.00728757	1262.09	1203.92	1308.04	1482.51	1376.62	1440.89
YTHDF1	592.275	-0.255186	0.0768564	-3.3203	0.000899219	0.00729603	632.055	642.357	659.599	556.065	525.853	537.72
ULBP21	943.167	-0.217438	0.0654923	-3.32005	0.00090001	0.00729791	976.445	1020.39	1046.88	824.272	882.834	908.186
LOC100337323	126.655	0.551437	0.166326	3.31539	0.000915143	0.00741601	113.446	96.7526	98.2144	167.016	131.463	153.037
FBRSL1	898.272	-0.223394	0.0673932	-3.31478	0.000917144	0.00742762	1013.92	915.659	972.1	825.255	865.733	796.963
ATF6	1265.58	0.190339	0.0574396	3.31373	0.000920606	0.00744719	1175.99	1214.89	1155.14	1410.79	1310.36	1326.32
BEND3	394.071	-0.329982	0.0995811	-3.3137	0.000920702	0.00744719	405.164	445.86	467.635	361.54	312.091	372.139
B3GALT6	207.099	-0.425392	0.128388	-3.31332	0.000921959	0.00744825	244.111	222.431	246.652	181.753	160.321	187.324
SEC14L1	2205.89	0.148321	0.0447651	3.31331	0.000921975	0.00744825	2131.16	2067.71	2079.24	2328.4	2299	2329.84
LOC100847604	1458.52	0.196634	0.0593581	3.31268	0.000924076	0.00746061	1392.75	1403.41	1277.9	1608.26	1612.83	1455.94
AP2A1	2275.99	-0.167664	0.0506656	-3.30923	0.00093552	0.00754534	2482.64	2268.2	2476.57	2193.8	2040.35	2194.37
ZBTB49	163.493	0.468907	0.141699	3.30917	0.000935726	0.00754534	137.756	129.668	143.973	190.595	196.66	182.306
PACSIN3	458.574	-0.285311	0.0863066	-3.30578	0.000947129	0.00763258	523.674	497.727	489.956	415.575	407.215	417.297
NEDD1	861.235	0.220829	0.0668232	3.30467	0.000950881	0.00765808	774.876	821.898	790.18	958.868	884.971	936.62
FBXL18	437.554	0.297766	0.0901563	3.30277	0.000957346	0.00770539	401.112	371.051	405.135	498.1	491.651	458.275
CROT	138.84	0.538993	0.163399	3.29863	0.000971576	0.0078103	111.42	133.658	93.7501	179.788	161.39	153.037
TIMP3	952.303	-0.21449	0.0650231	-3.29867	0.000971437	0.0078103	1053.43	1052.31	963.171	895.991	850.77	898.151
APPBP2	897.207	0.217191	0.0658565	3.29794	0.000973956	0.00782461	796.147	865.786	827.01	999.148	950.169	944.982
PPM1F	1357.71	-0.186097	0.0564486	-3.29675	0.000978098	0.00785305	1520.38	1415.38	1399.56	1302.72	1238.75	1269.45
SLC38A2	1731.2	0.190093	0.0576725	3.29608	0.000980455	0.00786714	1635.85	1707.63	1504.47	1907.91	1896.06	1735.25
LOC112444531	3807.51	-0.128423	0.0389788	-3.29469	0.000985288	0.00790107	4097.22	3878.08	3956.48	3638	3596.53	3678.74
CTSV	7600.53	-0.110376	0.0335376	-3.29111	0.000997942	0.00799763	7863.22	8037.45	7773.45	7468.56	7121.45	7339.08
ZBTB7A	1559.66	-0.173416	0.0526985	-3.29072	0.000999317	0.00800374	1711.82	1653.77	1593.75	1428.48	1482.43	1487.72
TMSB10	10697.6	-0.120758	0.0367068	-3.28981	0.00100254	0.00802462	11444.9	10578	11416.3	10351.1	9979.44	10415.7
BAG3	1531.61	0.171498	0.0521348	3.28952	0.00100359	0.00802809	1491	1401.42	1429.69	1606.3	1628.86	1632.39
CDR2	537.99	-0.269398	0.081985	-3.28595	0.00101639	0.00812554	626.991	567.549	569.197	479.434	498.064	486.708
LIPG	1366.06	-0.186224	0.0567175	-3.28337	0.00102576	0.00819538	1416.05	1487.2	1460.94	1321.39	1204.54	1306.25
HOXC10	77.3525	-0.674119	0.205623	-3.27842	0.00104391	0.00833533	87.1102	99.7449	98.2144	56.9819	65.1972	56.8662
UBXN2B	1128.69	0.211504	0.0645293	3.27765	0.00104675	0.00835287	956.186	1100.19	1082.59	1255.57	1176.76	1200.88
HACE1	1075.32	0.22494	0.0686449	3.27687	0.00104965	0.00837093	980.496	1078.24	916.296	1196.62	1082.7	1197.53
HPRT1	2502.34	0.144933	0.0442342	3.27648	0.00105108	0.00837722	2403.63	2424.8	2299.11	2625.1	2677.36	2584.07
LOC101906676	388.663	-0.315429	0.0962765	-3.27628	0.00105184	0.00837812	458.848	408.954	425.224	369.4	329.192	340.361
SLC25A6	6901.51	-0.116939	0.0357048	-3.27517	0.00105597	0.00840594	7423.61	6893.37	7226.57	6648.21	6619.12	6598.15
C16H1orf112	316.687	0.34251	0.104651	3.27289	0.00106455	0.00846906	256.266	298.237	283.483	348.768	353.775	359.595
CDC123	852.27	0.217102	0.066367	3.27124	0.00107079	0.00850829	760.695	803.944	801.34	901.886	899.935	945.818
LOC112441463	14.1546	1.72846	0.528367	3.27133	0.00107043	0.00850829	9.11618	4.98725	5.58037	14.7367	24.5825	25.9243
CBLB	330.62	-0.335612	0.102613	-3.27066	0.00107298	0.0085205	378.828	382.023	344.867	307.506	292.853	277.641
BLOC1S5	450.834	0.298129	0.0913083	3.26508	0.00109435	0.00868492	396.048	394.99	422.992	452.908	516.233	521.831
PHB2	4620.5	-0.121693	0.0373266	-3.26022	0.00111324	0.0088295	4909.57	4650.11	4886.17	4448.52	4444.1	4384.55
SF3A2	1242.98	-0.202571	0.0621454	-3.25962	0.0011156	0.00884282	1444.41	1259.78	1285.72	1127.85	1173.55	1166.59
TMEM106C	1075.09	-0.200154	0.0614128	-3.25917	0.00111741	0.00885178	1163.83	1103.18	1183.04	1035.5	959.788	1005.19
LOC788201	163.304	0.461314	0.141632	3.25713	0.00112546	0.0089102	134.717	145.628	131.697	181.753	194.523	191.505
UBA6	595.94	0.308631	0.0947659	3.25678	0.00112686	0.00891583	491.261	619.416	484.376	644.485	721.444	614.657
LOC101904332	13.6133	1.74817	0.537021	3.2553	0.00113272	0.00895135	7.09037	3.9898	7.81251	15.7191	20.3073	26.7606
ZNF333	236.565	0.390373	0.119913	3.25547	0.00113204	0.00895135	191.44	211.459	212.054	273.12	251.169	280.15
LOC782101	211.746	0.495165	0.152127	3.25496	0.0011341	0.00895146	170.169	179.541	176.34	212.208	320.642	211.576
ERI2	292.907	0.36834	0.113161	3.255	0.00113392	0.00895146	223.853	273.301	270.09	353.681	319.573	316.945
HSPH1	2423.71	-0.142725	0.043903	-3.25092	0.00115033	0.00907403	2536.33	2544.49	2547.99	2352.96	2319.31	2241.2
FAM160B2	425.349	-0.296885	0.0913506	-3.24995	0.00115424	0.00909943	475.054	474.786	457.59	404.768	352.706	387.192
PRR12	632.437	-0.251488	0.0774456	-3.24729	0.00116509	0.0091794	732.333	644.352	685.269	566.871	592.119	573.679
MYEF2	1993.42	0.191996	0.059159	3.24542	0.00117277	0.00923429	1789.81	2026.82	1762.28	2159.42	2232.74	1989.48
BLZF1	510.711	0.271379	0.0836822	3.24298	0.00118288	0.00930829	452.77	466.806	468.751	526.591	585.706	563.644
YY1	2105.96	-0.160616	0.0495322	-3.24266	0.00118417	0.00931289	2147.37	2354.98	2165.18	1967.84	2024.32	1976.1
LOC100848025	6.83367	2.78332	0.858448	3.24227	0.0011858	0.00932008	2.02582	1.9949	1.11607	12.7718	13.8945	9.19894
TECR	1630.9	-0.174906	0.053964	-3.24116	0.00119044	0.00935086	1797.91	1627.84	1764.51	1563.07	1494.19	1537.9
INTU	101.675	0.604712	0.186682	3.23927	0.00119838	0.00940762	98.2522	70.8189	72.5447	124.771	128.257	115.405
CLUH	2333.09	-0.14632	0.0452298	-3.23503	0.0012163	0.00954252	2467.45	2363.96	2523.44	2207.56	2224.19	2211.93
NDUFS3	806.143	-0.220897	0.0683001	-3.23421	0.00121979	0.00956422	876.167	895.71	831.474	724.063	741.751	767.694
FEM1B	327.856	0.337735	0.104454	3.23333	0.00122356	0.00958796	267.408	294.248	306.92	360.558	390.114	347.887
BCL2L11	140.585	0.506285	0.156606	3.23286	0.00122558	0.00959806	130.665	99.7449	118.304	169.963	159.252	165.581
HCN2	457.269	-0.283251	0.0876501	-3.23161	0.00123096	0.00963444	494.3	479.773	532.367	403.785	421.11	412.28
TERF1	1785.51	-0.188239	0.0582714	-3.23038	0.00123625	0.00967004	1880.97	1993.9	1825.9	1672.12	1795.59	1544.59
ARL5A	208.963	0.436583	0.135174	3.22979	0.00123882	0.00968431	179.285	185.526	167.411	280.98	222.312	218.266
YIPF6	664.612	0.246057	0.0761883	3.22959	0.00123969	0.0096853	620.913	606.449	594.867	729.958	763.128	672.359
LOC618409	8.91275	2.24086	0.693958	3.22909	0.00124183	0.00969041	4.05164	1.9949	3.34822	11.7894	13.8945	18.3979
SYTL2	863.758	-0.224825	0.0696228	-3.22919	0.00124141	0.00969041	990.625	890.722	909.6	821.325	817.637	752.641
MISP	12.7857	1.74706	0.541072	3.22888	0.00124276	0.00969186	6.07746	6.98215	4.46429	19.6489	20.3073	19.2342
PAPOLA	3609.44	0.141483	0.0438484	3.22664	0.00125251	0.00976213	3392.23	3591.82	3309.16	3794.21	3921.45	3647.8
SREBF2	2201.1	-0.161467	0.0500583	-3.22558	0.00125718	0.00979266	2424.91	2205.36	2343.75	2149.59	1996.53	2086.49
SPHK2	565.354	-0.261603	0.0811882	-3.22218	0.00127218	0.00990361	653.327	576.526	619.421	531.503	508.752	502.597
AK2	4896.86	0.118174	0.0366864	3.22119	0.00127658	0.00993193	4806.25	4637.14	4642.86	5079.25	5218.98	4996.7
LMTK3	88.238	-0.626185	0.194454	-3.22023	0.00128088	0.0099535	116.485	96.7526	108.259	61.8941	71.61	74.4278
RGS17	330.829	0.347767	0.107992	3.2203	0.00128056	0.0099535	324.131	264.324	284.599	343.856	397.596	370.466
CPD	3601.28	0.156794	0.0487083	3.21904	0.00128618	0.00998284	3409.45	3546.93	3257.82	4068.31	3718.38	3606.82
SCARB2	2194.93	0.164609	0.0511334	3.21921	0.00128546	0.00998284	2125.08	2089.66	1993.31	2472.82	2239.15	2249.56
SYNE2	608.752	0.267075	0.0829724	3.21884	0.00128711	0.00998405	541.907	560.567	555.804	733.887	603.875	656.47
GPRC5B	234.918	-0.380555	0.118237	-3.21856	0.00128835	0.00998777	264.369	263.327	268.974	200.419	215.899	196.523
TNFAIP1	599.628	0.25312	0.078687	3.21679	0.00129633	0.0100436	572.294	539.62	530.135	672.976	614.563	668.178
KMT5A	827.884	0.225502	0.0701313	3.21543	0.0013025	0.0100855	808.302	730.133	750.001	919.57	913.829	845.466
AXIN1	846.632	-0.234055	0.0728283	-3.21379	0.00130997	0.0101373	998.729	893.715	852.68	738.8	793.054	802.817
PPIP5K2	965.709	0.210531	0.0655141	3.21352	0.0013112	0.0101409	911.618	923.638	848.216	1053.18	1074.15	983.451
S100A16	2731.25	-0.136503	0.0425098	-3.21109	0.00132233	0.0102208	2878.69	2791.86	2912.95	2580.89	2570.48	2652.64
GBGT1	289.813	-0.355289	0.110665	-3.21048	0.00132513	0.0102355	351.48	302.227	321.429	252.489	270.408	240.845
TNFAIP8L1	359.795	-0.312873	0.0974593	-3.2103	0.00132597	0.0102355	390.983	416.934	387.277	333.049	322.779	307.746
IL13RA1	734.084	0.230513	0.0718071	3.21017	0.00132658	0.0102355	677.636	702.204	645.09	781.045	828.325	770.202
DYNLL1	1940.7	-0.164901	0.0513761	-3.20967	0.00132886	0.010247	2083.55	2018.84	2055.81	1791	1750.7	1944.32
COPG1	3651.89	-0.124613	0.0388568	-3.20697	0.00134141	0.0103378	3876.4	3757.39	3792.42	3487.68	3568.74	3428.7
INTS2	408.199	0.291245	0.0909517	3.2022	0.00136384	0.0105044	355.531	368.059	378.349	446.031	444.623	456.602
ARID1A	2410.79	-0.140599	0.0439247	-3.20091	0.00136993	0.0105395	2534.3	2514.57	2536.83	2345.1	2231.67	2302.24
SEMA3F	587.225	-0.250424	0.0782356	-3.2009	0.00137001	0.0105395	635.094	644.352	636.162	536.416	507.683	563.644
DTNB	106.605	0.59328	0.185442	3.19928	0.00137773	0.0105927	84.0715	86.7781	84.8216	112.981	115.431	155.546
CGN	415.587	-0.307399	0.0961322	-3.19767	0.00138544	0.0106456	463.912	446.857	469.867	398.873	325.986	388.028
COL5A1	6312.5	-0.120539	0.0377182	-3.19579	0.00139448	0.0107088	6619.36	6387.67	6719.88	6278.81	6031.27	5837.98
ERBIN	3468.25	0.152423	0.047701	3.19537	0.00139651	0.0107158	3133.94	3446.19	3273.44	3861.01	3609.36	3485.56
ANKS4B	132.476	0.529986	0.165866	3.19526	0.00139704	0.0107158	100.278	97.75	127.232	167.016	164.596	137.984
RASA1	1037.36	0.208301	0.0651943	3.19508	0.00139791	0.0107162	944.032	1012.41	931.921	1167.15	1038.88	1129.8
CERS6	633.071	0.262687	0.0822592	3.19341	0.00140605	0.0107723	547.984	634.378	542.412	713.256	713.962	646.435
LIME1	24.7779	1.22349	0.383281	3.19213	0.00141226	0.0108135	19.2453	14.9617	10.0447	35.3681	40.6146	28.4331
CRKL	3169.09	-0.149875	0.0469737	-3.19063	0.00141965	0.0108636	3368.94	3198.82	3437.51	3078	2819.51	3111.75
CSNK2B	1552.97	-0.163943	0.0513855	-3.19046	0.00142046	0.0108636	1649.02	1625.84	1647.32	1442.23	1509.15	1444.23
ATL2	461.353	0.278884	0.0874331	3.18968	0.00142429	0.0108865	405.164	442.868	401.786	501.048	520.509	496.743
RPAIN	29.4915	1.12574	0.353151	3.18771	0.00143403	0.0109545	19.2453	10.9719	25.6697	37.333	42.7522	40.9771
NXT1	635.521	-0.237061	0.0743841	-3.18698	0.00143764	0.0109757	674.598	686.245	702.01	600.275	577.155	572.843
FLT1	1480.71	-0.167824	0.052732	-3.18259	0.00145965	0.0111372	1528.48	1566.99	1604.91	1363.64	1423.65	1396.57
RPS23	9189.02	-0.107417	0.0337711	-3.18074	0.00146901	0.0112021	9775.59	9280.27	9537.96	9076.82	8658.4	8805.06
RHOD	253.976	-0.372618	0.117156	-3.18053	0.00147005	0.0112027	297.795	295.245	265.625	211.226	241.55	212.412
PHF6	192.096	0.444085	0.139633	3.18038	0.00147081	0.0112027	166.117	182.533	138.393	234.805	230.862	199.868
ABHD4	457.803	-0.272326	0.0856327	-3.18017	0.0014719	0.0112044	497.339	507.702	497.769	411.645	412.559	419.806
LYRM1	82.7283	0.648728	0.204013	3.17984	0.00147357	0.0112107	67.8649	70.8189	54.6876	96.2797	92.9861	113.732
SPRED3	93.7957	0.595843	0.187759	3.17345	0.00150639	0.0114537	69.8907	69.8215	84.8216	112.981	109.018	116.241
SCAND1	759.89	-0.235621	0.0742777	-3.17216	0.00151311	0.0114904	879.205	781.003	806.921	697.537	656.247	738.424
ARHGEF12	3253.64	0.164448	0.0518434	3.17201	0.00151386	0.0114904	2857.42	3172.89	3175.23	3685.16	3311.16	3319.98
ITGA5	4726.79	-0.130801	0.0412354	-3.17206	0.00151362	0.0114904	4867.03	4728.91	5229.92	4553.64	4461.2	4520.03
FLT3LG	37.9781	0.962946	0.303753	3.17016	0.00152356	0.0115573	28.3615	18.9515	30.134	43.2276	54.5091	52.6848
H3F3A	2278.73	-0.152779	0.0482	-3.1697	0.00152599	0.011569	2497.83	2366.95	2331.48	2072.96	2238.08	2165.1
MAP4K4	5503.79	0.117179	0.0369805	3.16866	0.00153146	0.0116037	5072.65	5329.37	5441.97	5702.12	5679.64	5797.01
GAS2L3	764.685	0.253929	0.0801591	3.16781	0.00153591	0.0116307	663.456	763.049	665.18	917.605	787.71	791.109
FAAP100	117.577	-0.523293	0.16521	-3.16745	0.00153783	0.0116384	136.743	141.638	137.277	96.2797	101.537	91.9894
DIAPH3	1827.46	0.163467	0.0516258	3.16637	0.00154353	0.0116748	1704.73	1756.51	1707.59	1950.16	2016.84	1828.92
GFOD1	1187.98	-0.198982	0.062864	-3.16528	0.00154935	0.0117121	1221.57	1245.81	1341.52	1175.99	1097.66	1045.33
MTMR6	838.155	0.229304	0.0725103	3.16236	0.00156495	0.0118232	831.599	769.034	713.171	957.885	877.49	879.753
ACP2	458.932	0.279469	0.088401	3.16138	0.00157025	0.0118563	403.138	400.975	440.849	480.416	505.545	522.667
PSMA2	2649.95	0.132002	0.0417962	3.15823	0.00158732	0.0119783	2509.99	2539.51	2537.95	2778.36	2738.28	2795.64
ALKBH5	1297.98	-0.181601	0.0575104	-3.1577	0.00159019	0.011993	1406.93	1389.45	1339.29	1228.06	1267.6	1156.56
PSRC1	514.761	-0.261594	0.0828976	-3.15563	0.0016015	0.0120713	571.281	556.577	556.92	485.328	439.279	479.181
SCRN1	316.408	-0.334265	0.105937	-3.15532	0.00160324	0.0120775	364.647	375.041	318.081	285.892	282.165	272.623
BIK	76.8947	-0.687345	0.217951	-3.15367	0.00161232	0.0121389	88.1231	78.7985	118.304	54.0345	57.7155	64.3926
MFSD12	1085.51	0.194473	0.0616914	3.15236	0.00161958	0.0121865	1013.92	1000.44	1021.21	1138.66	1229.13	1109.73
IRF3	675.666	0.232456	0.0737584	3.15158	0.0016239	0.012212	624.965	604.454	633.929	713.256	767.403	709.991
RPL23A	10827.5	-0.0925882	0.0293903	-3.1503	0.00163104	0.0122586	11251.4	11043.8	11231	10406.1	10461.5	10571.3
LRRC20	140.107	-0.478301	0.151848	-3.14986	0.00163346	0.0122698	160.04	159.592	169.643	122.806	116.5	112.06
ASF1B	577.187	-0.254727	0.0808877	-3.14915	0.00163748	0.0122929	647.249	652.332	582.59	530.521	546.16	504.269
RPUSD1	90.3418	-0.624471	0.198373	-3.14797	0.00164411	0.0123356	127.627	113.709	87.0537	70.7361	72.6788	70.2465
LRFN1	57.7346	-0.756637	0.240479	-3.14637	0.00165311	0.012396	81.0327	69.8215	66.9644	37.333	42.7522	48.5035
PHGDH	5160.41	-0.110787	0.0352238	-3.14523	0.00165954	0.012437	5313.72	5365.28	5398.45	5047.81	4843.83	4993.35
TTC37	600.936	0.249877	0.0794518	3.14501	0.00166082	0.0124394	518.61	569.544	559.153	691.642	625.252	641.417
SP100	7.67715	2.40903	0.766396	3.14332	0.00167042	0.0125042	2.02582	2.99235	2.23215	15.7191	13.8945	9.19894
YPEL2	696.195	0.227655	0.0724322	3.143	0.00167224	0.0125106	644.21	665.299	613.84	772.203	740.683	740.933
SLCO5A1	146.354	0.472077	0.150209	3.14281	0.00167336	0.0125119	126.614	124.681	116.072	179.788	172.078	158.891
UBALD1	283.307	-0.372635	0.118601	-3.14193	0.00167837	0.0125422	353.505	269.311	337.054	249.541	236.206	254.225
SH3PXD2A	1240.32	0.186637	0.0594364	3.14011	0.00168884	0.0126131	1106.1	1227.86	1147.32	1341.04	1274.02	1345.55
PAPD4	412.039	0.285982	0.0910927	3.13946	0.00169261	0.0126297	372.751	388.008	352.679	454.873	453.174	450.748
C23H6orf141	97.2143	0.575764	0.1834	3.13939	0.00169299	0.0126297	83.0586	72.8138	78.1251	117.894	121.844	109.551
RASSF7	364.744	-0.314042	0.100051	-3.1388	0.0016964	0.0126479	421.37	382.023	410.715	340.909	293.922	339.525
ATP5MC3	4323.93	-0.119812	0.0381832	-3.13781	0.00170215	0.0126835	4519.6	4354.86	4637.28	4192.1	4112.77	4126.98
PRKD3	1341.36	0.199854	0.0637479	3.13507	0.00171814	0.0127808	1149.65	1367.5	1227.68	1492.34	1411.89	1399.08
ERICH5	2775.19	0.168755	0.0538263	3.13517	0.00171755	0.0127808	2652.81	2784.88	2399.56	3097.65	2815.24	2901.01
ZZZ3	1113.2	0.200511	0.0639535	3.13527	0.00171698	0.0127808	1024.05	1100.19	981.028	1238.86	1207.75	1127.29
KIAA0232	666.092	0.230047	0.0734153	3.13351	0.00172732	0.0128418	603.694	593.482	642.858	717.186	719.306	720.026
TLN2	264.623	-0.355152	0.113368	-3.13274	0.00173185	0.0128681	311.976	274.299	304.688	237.752	234.069	224.956
PLEKHG6	503.772	0.276038	0.0881186	3.13257	0.00173283	0.0128681	441.628	472.791	454.242	522.661	525.853	605.458
HERPUD2	540.071	0.257284	0.0821475	3.13197	0.00173636	0.012887	494.3	518.674	463.17	590.45	567.536	606.294
ELK4	98.8975	0.584284	0.186565	3.13179	0.00173742	0.0128875	77.994	75.8062	83.7055	137.542	107.949	110.387
TBKBP1	15.4463	1.60367	0.512239	3.1307	0.0017439	0.0129209	8.10327	3.9898	11.1607	21.6138	16.0321	31.7782
LZTS2	646.757	-0.238593	0.0762068	-3.13086	0.00174296	0.0129209	723.217	656.322	720.983	615.011	584.637	580.37
MYC	2239.85	0.14496	0.0463246	3.12921	0.00175274	0.012979	2081.53	2096.64	2206.48	2305.8	2346.03	2402.6
ARHGEF2	1713.46	-0.169972	0.0543399	-3.12793	0.0017604	0.0130284	1769.55	1807.38	1869.42	1659.35	1501.67	1673.37
TNFAIP3	177.789	0.446648	0.142887	3.12587	0.0017728	0.0131127	147.885	144.63	159.598	230.875	176.353	207.394
ZNF462	1114.05	0.19905	0.0637089	3.12437	0.00178189	0.0131725	1022.03	1074.25	1014.51	1282.09	1153.24	1138.16
TEAD1	2378.69	0.164918	0.0528036	3.12324	0.0017887	0.0132153	2071.4	2358.97	2296.88	2590.71	2549.1	2405.11
RHOBTB1	87.4555	-0.649193	0.207904	-3.12257	0.00179282	0.0132383	95.2135	108.722	117.188	82.5255	49.1651	71.919
TAF2	2396.66	0.138673	0.0444227	3.12167	0.00179827	0.013271	2319.56	2285.16	2239.96	2571.06	2452.91	2511.31
DHX9	6385.21	0.131144	0.0420266	3.12051	0.00180539	0.0133109	5709.77	6359.74	6216.53	6898.74	6540.02	6586.44
IREB2	1168.13	0.195412	0.0626229	3.12045	0.00180572	0.0133109	1103.06	1130.11	1032.37	1328.27	1221.65	1193.35
CPM	86.1165	0.632499	0.202749	3.11961	0.00181088	0.0133415	69.8907	69.8215	62.5001	124.771	99.399	90.3169
RPS13	6344.53	-0.111954	0.035891	-3.11928	0.00181297	0.0133493	6753.07	6372.7	6645.1	5993.9	6238.62	6063.78
SLC38A6	140.413	0.482747	0.155016	3.11417	0.00184461	0.0135746	110.407	127.674	112.723	167.998	173.147	150.528
OTULIN	787.535	-0.217746	0.0699958	-3.11085	0.00186551	0.0137207	806.276	866.784	868.305	759.431	696.862	727.553
BCAT1	4339.87	0.14834	0.0477032	3.10964	0.00187314	0.013769	4080	4319.95	3945.32	4485.85	4881.24	4326.85
IGFBPL1	2444.75	-0.139011	0.0447385	-3.1072	0.00188869	0.0138756	2536.33	2526.54	2626.12	2253.73	2352.44	2373.33
TADA2B	958.254	-0.194596	0.0626374	-3.1067	0.00189187	0.0138833	1004.81	1059.29	1003.35	887.149	908.485	886.443
RPS14	6606.51	-0.110659	0.0356186	-3.10678	0.00189137	0.0138833	6627.47	6875.42	7079.25	6256.22	6357.26	6443.44
B3GALNT1	739.489	0.219782	0.0707653	3.10579	0.00189775	0.0139165	679.662	709.187	660.715	822.308	770.609	794.454
GRB7	38.895	-0.914805	0.29456	-3.10566	0.00189852	0.0139165	53.6842	44.8852	53.5715	28.4909	30.9954	21.743
HELZ	565.089	-0.246755	0.0794737	-3.10486	0.00190369	0.0139444	607.746	618.419	613.84	547.223	494.857	508.451
PI4K2B	962.05	0.221117	0.0712192	3.10474	0.00190447	0.0139444	889.334	953.562	819.198	1042.38	1101.94	965.889
COX8A	1879.59	-0.154746	0.0498828	-3.10219	0.00192093	0.014057	2038.99	1929.07	1973.22	1706.51	1815.9	1813.86
KAT2B	463.425	0.281094	0.0906367	3.10133	0.00192653	0.0140718	409.215	406.959	440.849	526.591	461.724	535.211
SNAI1	52.358	-0.776393	0.250343	-3.10132	0.00192662	0.0140718	59.7617	71.8164	66.9644	41.2627	34.2018	40.1408
LOC112443216	661.753	0.23992	0.0773608	3.1013	0.0019267	0.0140718	570.268	599.467	652.903	705.396	691.518	750.968
BMPR1B	229.725	0.389427	0.125578	3.10108	0.00192816	0.0140718	179.285	223.429	194.197	273.12	241.55	266.769
ZSWIM4	154.679	-0.467829	0.150861	-3.10105	0.00192834	0.0140718	188.401	170.564	179.688	109.052	143.22	137.148
STARD9	114.617	0.545227	0.175963	3.09853	0.00194483	0.0141763	86.0973	97.75	95.9823	158.174	117.569	132.13
ATP6V1C1	1929.97	0.156203	0.0504113	3.09857	0.00194458	0.0141763	1810.07	1918.1	1746.65	2086.72	2017.91	2000.35
SPECC1L	1251.47	0.182352	0.0588546	3.09834	0.00194605	0.0141773	1137.5	1166.02	1215.4	1394.09	1268.67	1327.16
FSD1L	115.536	0.552678	0.178592	3.09463	0.00197056	0.0143478	99.2651	108.722	72.5447	148.349	127.188	137.148
CYB5R1	832.891	-0.219318	0.0708906	-3.09376	0.00197639	0.0143718	950.109	854.814	885.046	743.712	744.958	818.706
MAMSTR	37.8266	0.928858	0.300247	3.09364	0.00197715	0.0143718	22.284	24.9362	31.25	53.0521	42.7522	52.6848
GNB2	3080.65	-0.130861	0.0422993	-3.0937	0.00197679	0.0143718	3278.79	3129	3253.35	2846.15	3008.69	2967.91
SREBF1	749.79	-0.230123	0.074436	-3.09155	0.00199112	0.0144653	856.921	779.008	793.528	728.975	637.008	703.301
STAM2	497.354	0.280164	0.0906444	3.0908	0.00199616	0.0144938	495.313	444.862	406.251	580.626	534.403	522.667
PHRF1	1004.53	-0.188432	0.0610043	-3.08883	0.00200949	0.0145825	1099.01	1061.29	1049.11	931.359	952.306	934.111
LBH	44.0932	-0.853854	0.276495	-3.08814	0.00201415	0.0146001	59.7617	48.875	61.384	31.4383	36.3394	26.7606
AKAIN1	65.8841	-0.680149	0.220235	-3.0883	0.00201308	0.0146001	82.0457	80.7934	80.3573	52.0697	52.3715	47.6672
TOR1B	737.689	0.214906	0.0696229	3.08671	0.00202382	0.014662	703.972	670.286	674.108	783.01	799.467	795.29
CDCA8	1348.88	-0.167699	0.0543485	-3.08563	0.00203122	0.0147075	1432.25	1458.27	1389.51	1279.15	1284.7	1249.38
LOC534742	1128.09	0.192827	0.0625291	3.0838	0.00204376	0.0147901	1064.57	1054.3	1036.83	1243.78	1252.64	1116.42
TNFAIP2	466.817	-0.266388	0.0863949	-3.08338	0.00204665	0.0148028	499.364	494.735	535.715	437.189	415.766	418.134
PDP2	113.665	-0.514993	0.167278	-3.07866	0.00207934	0.0150309	135.73	131.663	133.929	92.3499	92.9861	95.3345
LOC104971266	24.7756	1.1651	0.378515	3.07808	0.00208336	0.0150516	14.1807	15.9592	15.625	43.2276	32.0642	27.5968
IER5L	103.759	-0.564274	0.183375	-3.07715	0.0020899	0.0150905	128.639	103.735	139.509	88.4202	76.954	85.2993
ARL4C	433.375	-0.281613	0.091563	-3.07562	0.00210067	0.0151599	488.222	440.873	498.885	391.996	373.013	407.262
FLII	5343.88	-0.112598	0.0366413	-3.07297	0.00211943	0.0152868	5610.5	5390.22	5659.61	5040.93	5103.55	5258.45
SKI	1112.48	-0.190506	0.0620491	-3.07025	0.00213882	0.0154182	1253.98	1112.16	1191.97	1055.15	1019.64	1041.99
VEGFB	248.355	-0.361637	0.117809	-3.06968	0.00214287	0.0154388	276.524	267.316	294.643	235.787	200.936	214.921
ANK1	10.351	1.96873	0.641623	3.06837	0.00215233	0.0154985	3.03873	1.9949	7.81251	21.6138	11.7569	15.8891
LIN7B	12.9798	-1.63281	0.532211	-3.06798	0.00215509	0.0155012	16.2065	25.9337	16.7411	5.89468	6.41284	6.69014
ELP5	1129.99	-0.192713	0.0628131	-3.06804	0.00215466	0.0155012	1252.97	1152.05	1208.71	1064.97	1109.42	991.813
ARHGAP11A	2394.68	0.150552	0.0490976	3.06639	0.00216662	0.0155756	2242.58	2396.87	2166.3	2518.01	2605.75	2438.56
PIM3	481.479	-0.269688	0.0879557	-3.06618	0.00216813	0.0155779	550.01	493.737	536.831	422.452	420.041	465.801
WNT10B	35.8972	-1.01834	0.332232	-3.06514	0.00217565	0.0156232	40.5164	34.9107	69.1965	19.6489	23.5137	27.5968
POLDIP3	2370.84	-0.136792	0.0446435	-3.06409	0.00218331	0.0156696	2416.8	2504.6	2530.14	2239	2230.6	2303.92
JCAD	137.229	-0.469179	0.153175	-3.06302	0.00219115	0.0157173	151.936	165.577	160.715	116.911	111.156	117.077
PFN1	11877.3	-0.0979197	0.0319954	-3.06043	0.0022102	0.0158453	12406.1	11965.4	12472.1	11194	11533.5	11692.7
UBA2	2588.75	0.151028	0.0493573	3.05989	0.0022142	0.0158652	2405.66	2553.47	2399.56	2901.16	2636.74	2635.91
SLC2A4RG	616.618	0.236602	0.0773495	3.05887	0.00222175	0.0159106	599.642	543.61	555.804	652.344	658.385	689.921
RBMS2	506.403	0.281623	0.0921229	3.05704	0.00223536	0.0159992	457.835	410.949	504.465	514.802	555.779	594.586
RPS28	3761.06	-0.140509	0.045971	-3.05648	0.00223955	0.0160204	4072.91	3722.48	4034.6	3679.26	3658.52	3398.59
PHIP	825.771	0.221799	0.0725742	3.05616	0.00224188	0.0160283	757.656	829.878	697.546	889.114	914.898	865.537
IMP3	301.883	-0.344718	0.112823	-3.05538	0.00224778	0.0160617	335.273	302.227	377.233	249.541	261.857	285.167
MCRIP2	343.954	-0.330966	0.108382	-3.0537	0.00226039	0.0161389	431.499	330.156	388.393	299.646	304.61	309.419
VEGFC	286.974	0.329567	0.107933	3.05345	0.00226229	0.0161389	248.163	256.345	258.929	332.067	303.541	322.799
SORBS2	1301.97	0.195534	0.0640345	3.05358	0.00226129	0.0161389	1158.77	1235.84	1248.89	1497.25	1268.67	1402.42
YARS	2022.26	0.145111	0.0475378	3.05254	0.00226916	0.0161786	1868.82	1921.09	1972.1	2175.14	2114.1	2082.31
PRELID1	3063.27	-0.130865	0.0428731	-3.05238	0.00227034	0.0161786	3289.93	3071.15	3247.77	2912.95	2874.02	2983.8
FAM114A1	437.341	0.288224	0.0944355	3.05208	0.00227263	0.0161862	389.97	432.893	357.143	506.942	478.825	458.275
ANKRD54	548.116	-0.247617	0.0811567	-3.0511	0.00228006	0.0162302	564.191	609.442	612.724	499.083	483.1	520.158
LOC100847567	859.49	0.204933	0.0672077	3.04924	0.00229419	0.0163218	783.992	782.998	829.242	875.36	951.237	934.111
VPS13D	670.113	0.248011	0.0813436	3.04893	0.00229658	0.01633	586.475	628.393	622.769	811.501	688.311	683.23
RNF217	259.615	0.350929	0.115132	3.04807	0.00230317	0.0163679	225.879	239.388	218.75	313.4	284.302	275.968
TMX4	1039.21	0.194078	0.0636936	3.04705	0.00231096	0.0164143	950.109	986.478	973.216	1157.32	1032.47	1135.65
GPKOW	386.288	0.289717	0.0951311	3.04545	0.00232334	0.0164933	364.647	348.11	329.242	443.083	425.385	407.262
BRCA1	2329.29	0.140851	0.0463163	3.04106	0.00235749	0.0167266	2143.32	2311.09	2191.97	2489.52	2415.5	2424.34
PTPN11	4010.36	0.134593	0.0442806	3.03955	0.0023693	0.0168013	3615.07	4000.77	3853.8	4362.06	4127.73	4102.73
PLEKHA7	1765.71	0.159561	0.0525342	3.03727	0.00238729	0.0169197	1662.18	1643.8	1702.01	1871.56	1760.32	1954.36
CASKIN2	427.739	-0.313008	0.103078	-3.03661	0.00239251	0.0169475	537.855	398.98	485.492	377.259	380.495	386.356
RPS6KA4	885.304	-0.205846	0.0677922	-3.03643	0.00239399	0.0169488	1001.77	888.727	955.359	798.729	825.118	842.121
SPTSSA	822.492	0.226027	0.0744485	3.03601	0.00239729	0.0169537	815.392	755.069	702.01	839.992	954.444	868.046
LOC100847802	455.335	0.315671	0.103975	3.03604	0.00239706	0.0169537	370.725	377.036	470.983	445.048	527.99	540.229
RAB4B	343.503	0.320653	0.105648	3.0351	0.00240459	0.0169962	296.782	292.253	329.242	361.54	358.05	423.151
AKAP8L	281.388	-0.331026	0.109115	-3.03374	0.00241544	0.0170636	323.118	299.235	318.081	238.734	260.789	248.371
MAL2	1019.16	0.197242	0.0650391	3.03266	0.00242409	0.0171062	967.328	990.467	888.394	1065.95	1145.76	1057.04
SQSTM1	1795.82	-0.151329	0.0498982	-3.03275	0.00242336	0.0171062	1883	1917.1	1871.65	1721.25	1629.93	1751.98
RPL18A	9875.92	-0.103762	0.0342344	-3.03094	0.00243792	0.0171945	10561.6	9803.93	10328.1	9446.22	9567.95	9547.67
TMSB4X	20270.1	-0.0945879	0.03122	-3.02972	0.00244781	0.017255	21175.9	21003.3	20628.4	19413.1	19092.1	20307.9
RPS6KA3	528.755	0.248428	0.0820176	3.02896	0.00245396	0.017289	468.977	498.725	482.144	547.223	594.256	581.206
TJP3	92.6575	-0.576481	0.190367	-3.02826	0.00245966	0.0173197	110.407	118.696	103.795	84.4904	64.1284	74.4278
ZNF358	444.129	-0.280613	0.0926758	-3.0279	0.00246263	0.0173313	520.635	449.85	492.188	378.242	396.527	427.333
NEURL1B	258.94	-0.351278	0.116044	-3.0271	0.00246913	0.0173677	265.382	316.191	289.063	234.805	226.587	221.611
AMER1	216.201	0.417963	0.138121	3.02605	0.00247771	0.0174187	164.091	214.452	177.456	254.454	211.624	275.132
NSL1	300.393	0.326712	0.108011	3.02479	0.00248805	0.017482	281.589	273.301	244.42	316.348	338.812	347.887
PARVA	5019.45	0.105063	0.0347671	3.02192	0.00251175	0.0176343	4872.09	4829.65	4809.16	5126.4	5212.57	5266.81
IDE	1352.09	0.190326	0.0629835	3.02184	0.00251244	0.0176343	1219.54	1358.53	1207.59	1445.18	1529.46	1352.24
ZNF705A	362.704	0.293706	0.0972043	3.02154	0.00251495	0.0176425	311.976	325.169	340.402	392.979	416.834	388.864
ZFAND2A	161.278	-0.44349	0.146844	-3.02015	0.00252649	0.017714	190.427	184.528	183.036	115.929	143.22	150.528
CDC20B	14.2132	1.54068	0.51024	3.01953	0.00253171	0.017741	10.1291	5.9847	5.58037	23.5787	22.4449	17.5616
MRPL38	644.354	-0.232281	0.0769585	-3.01826	0.0025423	0.0178003	721.191	646.347	722.099	581.608	583.568	611.311
AES	3168.04	-0.120047	0.0397744	-3.01819	0.0025429	0.0178003	3341.59	3249.69	3309.16	3005.3	3030.07	3072.45
NECTIN3	1013.38	0.200852	0.0665541	3.01787	0.00254556	0.0178093	918.709	969.521	939.734	1175.01	1049.57	1027.77
DPP8	1064.85	0.18626	0.0617557	3.01607	0.00256071	0.0179058	978.47	1036.35	972.1	1174.02	1139.35	1088.82
SOWAHA	22.8242	1.23509	0.409634	3.01511	0.00256886	0.0179532	12.1549	12.9668	15.625	43.2276	32.0642	20.9067
AGFG2	365.617	-0.289997	0.096204	-3.0144	0.00257488	0.0179856	423.396	395.987	387.277	327.155	327.055	332.834
GLIS3	2703.56	0.137969	0.0457784	3.01384	0.00257968	0.0180094	2551.52	2674.16	2496.66	2946.36	2743.63	2809.02
NF1	125.371	0.558093	0.185434	3.00966	0.00261536	0.0182488	94.2006	112.712	97.0984	193.542	125.05	129.621
DHCR7	535.594	-0.241914	0.0803935	-3.00913	0.00262	0.0182616	575.333	569.544	597.099	500.065	475.619	495.907
LOC507581	133.68	-0.497246	0.165239	-3.00926	0.00261883	0.0182616	175.233	162.584	131.697	98.2446	112.225	122.095
PLEC	20302.9	0.120974	0.0402548	3.0052	0.00265409	0.0184894	19220	18405.9	20736.6	21491	20380	21584.1
DENND1B	706.115	0.216266	0.0719731	3.00482	0.00265742	0.0185028	647.249	665.299	646.206	785.957	765.265	726.716
TNXB	201.738	-0.395813	0.131741	-3.00447	0.00266042	0.0185138	236.008	213.454	237.724	191.577	175.284	156.382
LOC516108	1177.41	-0.179068	0.0596396	-3.0025	0.00267768	0.0186239	1319.82	1201.93	1229.91	1081.67	1103.01	1128.12
CTIF	364.449	-0.290068	0.0967237	-2.99894	0.00270921	0.0188332	395.035	383.021	425.224	326.172	330.261	326.981
EXOSC5	391	-0.288382	0.0962674	-2.99563	0.00273875	0.0190183	431.499	411.947	445.313	365.47	369.807	321.963
IDH3A	6592.39	-0.100697	0.0336144	-2.99565	0.00273857	0.0190183	6833.09	6920.3	6709.83	6391.8	6464.14	6235.21
SP1	1567.73	0.183218	0.0611924	2.99412	0.00275236	0.0191026	1376.54	1552.03	1475.45	1801.81	1614.97	1585.56
LMNB2	3664.17	-0.120242	0.0401934	-2.99158	0.00277535	0.019252	3798.41	3792.3	3859.38	3653.72	3445.83	3435.39
FNBP1	1213.87	0.170259	0.0569722	2.98846	0.00280385	0.0194393	1121.29	1136.09	1169.64	1253.6	1318.91	1283.67
EFNA1	85.3031	-0.589174	0.197196	-2.98775	0.00281035	0.0194637	108.381	94.7577	104.911	64.8415	61.9908	76.9366
LOC520016	133.415	0.487543	0.163172	2.98792	0.00280887	0.0194637	108.381	117.699	107.143	180.77	136.807	149.692
EGLN2	964.468	0.185886	0.0622518	2.98604	0.00282613	0.0195626	923.773	874.763	908.483	1033.53	1033.54	1012.72
NAXD	1014.87	-0.186451	0.062515	-2.9825	0.00285903	0.0197748	1128.38	1066.27	1046.88	922.517	945.893	979.269
KLHL2	327.669	0.302988	0.101592	2.98242	0.0028598	0.0197748	290.705	304.222	284.599	376.277	362.325	347.887
RBM12B	1286.07	0.171501	0.0575201	2.98159	0.00286755	0.0198172	1179.03	1282.72	1166.3	1354.79	1371.28	1362.28
VPS37B	1379.72	-0.172938	0.0580049	-2.98144	0.00286898	0.0198172	1491	1392.44	1506.7	1298.79	1231.26	1358.1
TMEM230	869.108	0.199674	0.0670206	2.9793	0.0028891	0.0199456	833.624	837.858	754.465	933.324	928.792	926.584
SIAH1	331.927	0.297764	0.0999622	2.97877	0.00289407	0.0199694	294.757	308.212	290.179	367.435	365.532	365.449
PBRM1	916.909	0.203924	0.0684937	2.97726	0.00290837	0.0200575	825.521	925.633	803.573	980.481	1007.88	958.362
POLRMT	1098.03	-0.187105	0.0628502	-2.977	0.00291079	0.0200636	1206.38	1109.16	1193.08	969.674	1045.29	1064.57
AGL	142.366	0.456291	0.153312	2.97621	0.00291832	0.0201048	120.536	126.676	112.723	179.788	153.908	160.563
BATF3	215.198	0.373943	0.125733	2.9741	0.00293852	0.0202334	205.621	185.526	170.759	248.559	241.55	239.172
LMO7	4997.67	0.125928	0.0423609	2.97273	0.00295164	0.020313	4654.32	4841.62	4845.99	5472.23	4910.1	5261.79
AHCYL1	1809.05	0.144486	0.0486223	2.9716	0.0029625	0.0203769	1704.73	1692.67	1757.82	1906.93	1928.13	1864.04
C1H21orf91	159.457	0.466963	0.157247	2.96962	0.00298167	0.020497	132.691	160.589	107.143	183.717	202.004	170.599
PSMD7	1632.24	-0.154132	0.0519056	-2.96948	0.00298309	0.020497	1656.11	1797.4	1704.24	1544.41	1543.36	1547.93
HTR1D	17.7729	1.34229	0.452131	2.9688	0.00298963	0.0205311	12.1549	9.97449	7.81251	24.5612	32.0642	20.0704
SMARCA4	4768.17	-0.107987	0.0363949	-2.9671	0.00300621	0.0206341	4834.62	4924.41	5081.48	4632.23	4581.97	4554.31
C25H16orf72	616.99	0.23184	0.0781675	2.96594	0.00301761	0.0207015	545.958	602.459	553.572	699.502	649.834	650.616
LOC112442347	2836.15	-0.125566	0.0423431	-2.96543	0.00302256	0.0207245	2875.65	3034.24	2969.87	2691.9	2688.05	2757.17
C1H21orf62	6.76971	2.44822	0.826043	2.9638	0.00303868	0.0208241	2.02582	1.9949	2.23215	10.8069	16.0321	7.52641
UBE4A	1202	0.179381	0.0605419	2.96292	0.00304737	0.0208727	1139.52	1191.95	1049.11	1300.76	1261.19	1269.45
TIMM17A	2062.77	-0.151986	0.051301	-2.96264	0.00305015	0.0208808	2105.84	2189.4	2217.64	1847	2072.41	1944.32
DIAPH2	473.561	0.272878	0.0921281	2.96194	0.00305703	0.020917	414.28	482.766	388.393	527.574	521.577	506.778
HERPUD1	836.46	-0.201785	0.0681887	-2.95922	0.00308422	0.0210829	927.825	839.852	917.412	762.378	787.71	783.583
CRIP2	2467.04	-0.144168	0.0487188	-2.95919	0.00308452	0.0210829	2720.67	2485.64	2564.74	2238.01	2393.06	2400.09
RNF135	507.689	0.252149	0.0852665	2.95718	0.00310462	0.0211871	458.848	441.87	491.072	569.819	518.371	566.153
ATXN2L	2300.15	-0.143141	0.0483995	-2.9575	0.00310149	0.0211871	2485.68	2314.08	2443.08	2088.68	2254.11	2215.27
NCLN	1714.62	-0.158848	0.0537136	-2.95732	0.0031033	0.0211871	1861.73	1726.59	1841.52	1576.83	1577.56	1703.48
KIF5C	17.0288	1.39171	0.471166	2.95376	0.00313925	0.0214122	9.11618	9.97449	8.92858	19.6489	35.2706	19.2342
ERRFI1	2411.67	0.13122	0.0444371	2.95294	0.00314764	0.0214582	2230.43	2322.06	2354.91	2551.41	2488.18	2523.02
VARS	4625.96	-0.110226	0.0373299	-2.95274	0.00314963	0.0214605	4798.15	4720.93	4892.86	4430.83	4343.63	4569.37
ADAT1	191.429	0.403954	0.13685	2.9518	0.00315927	0.021515	181.311	140.64	172.991	207.296	218.036	228.301
ZNF879	86.9917	0.594705	0.201517	2.95115	0.00316598	0.0215495	61.7875	78.7985	66.9644	91.3675	121.844	101.188
ZNF444	360.204	-0.308393	0.104525	-2.95043	0.00317336	0.0215885	448.719	355.092	391.742	334.032	316.367	315.273
TMEM129	402.143	-0.280818	0.0952226	-2.94907	0.00318736	0.0216724	435.551	414.939	474.331	344.839	360.188	383.01
RIN1	437.95	-0.276475	0.0937928	-2.94772	0.00320124	0.0217554	509.493	454.837	474.331	362.523	431.798	394.718
PDSS2	132.303	0.475289	0.161288	2.94683	0.00321048	0.0218069	97.2393	128.671	106.027	153.262	153.908	154.709
SGK1	2566.36	0.12727	0.0431932	2.94654	0.00321353	0.0218163	2422.88	2411.83	2525.67	2700.74	2682.7	2654.31
ZNF687	578.097	-0.246413	0.0836676	-2.94515	0.00322799	0.021903	645.223	586.5	649.555	494.17	577.155	515.977
RAD1	242.938	0.350169	0.118932	2.94428	0.00323705	0.0219531	206.634	217.444	217.634	273.12	250.101	292.694
GID8	451.825	-0.258151	0.0876875	-2.94399	0.0032401	0.0219624	500.377	476.781	500.001	391.996	413.628	428.169
INTS7	1271.6	0.166167	0.056458	2.94321	0.00324832	0.0220067	1189.16	1167.02	1238.84	1339.07	1380.9	1314.61
GPN3	328.495	0.325949	0.110778	2.94237	0.00325713	0.0220549	290.705	294.248	287.947	369.4	412.559	316.109
PSAT1	2296.78	-0.129588	0.0440473	-2.94201	0.00326091	0.022069	2403.63	2364.95	2430.81	2205.59	2203.88	2171.79
ZBTB41	241.46	0.361897	0.123099	2.93988	0.00328341	0.0222042	234.995	180.538	218.75	273.12	270.408	270.951
KCNJ2	13.6965	-1.53699	0.522821	-2.9398	0.00328429	0.0222042	17.2195	25.9337	17.8572	10.8069	5.34403	5.0176
ARL4D	105.529	-0.529046	0.180042	-2.93845	0.00329855	0.0222891	127.627	109.719	137.277	92.3499	75.8852	90.3169
GBA2	452.711	0.25782	0.0877737	2.93732	0.00331059	0.0223589	407.19	394.99	435.268	482.381	505.545	490.889
ARCN1	2708.79	0.129655	0.0441761	2.93496	0.00333595	0.0225069	2540.38	2590.38	2632.82	2921.8	2719.04	2848.33
CENPC	547.845	0.257307	0.0876677	2.93502	0.00333523	0.0225069	520.635	533.635	440.849	613.046	617.77	561.135
DOK4	58.6636	-0.741787	0.252758	-2.93477	0.00333795	0.0225087	85.0844	73.8113	61.384	30.4558	50.2339	51.0123
CCDC34	603.33	-0.247006	0.0841714	-2.93456	0.00334022	0.0225124	642.185	650.337	669.644	551.152	612.426	494.234
ACTR3	5855.94	0.118565	0.040446	2.93145	0.00337384	0.0227273	5608.48	5865	5368.31	6283.73	6125.33	5884.81
ARHGAP17	1260.42	0.162611	0.0554879	2.93056	0.00338347	0.0227687	1177	1184.97	1207.59	1342.02	1302.87	1348.06
P3H1	980.295	-0.186722	0.0637128	-2.93068	0.00338216	0.0227687	1096.98	993.46	1041.3	911.71	904.21	934.111
MDH2	5370.53	-0.102707	0.0350556	-2.92983	0.00339151	0.022811	5631.78	5521.88	5531.26	5053.7	5247.84	5236.71
WAC	2005.39	0.14501	0.0495171	2.92847	0.00340634	0.0228989	1896.17	1971.96	1842.64	2140.75	2157.92	2022.93
FOXD1	156.885	-0.432068	0.147576	-2.92777	0.00341407	0.0229391	178.272	175.551	186.384	118.876	151.77	130.458
CALB1	415.684	-0.275939	0.0942627	-2.92734	0.00341877	0.0229509	459.861	474.786	429.688	399.856	383.701	346.215
PARD6A	33.1666	0.950388	0.324665	2.92729	0.00341934	0.0229509	24.3098	17.9541	25.6697	53.0521	39.5458	38.4683
ANAPC10	128.437	0.478076	0.163409	2.92564	0.00343753	0.0230611	98.2522	111.714	112.723	138.525	142.151	167.253
SEPHS1	1139.57	-0.172983	0.059135	-2.92523	0.00344207	0.0230797	1213.47	1235.84	1171.88	1083.64	1099.8	1032.79
LOC101902862	30.2684	-0.976498	0.333929	-2.92426	0.00345272	0.0231392	39.5035	38.9005	42.4108	16.7016	18.1697	25.9243
MIB1	862.78	0.245303	0.0839072	2.9235	0.0034612	0.0231841	775.889	842.845	751.117	1039.43	797.329	970.07
SPR	660.982	-0.227184	0.077719	-2.92315	0.00346513	0.0231986	754.617	670.286	714.287	647.432	577.155	602.113
EHBP1	263.895	0.329611	0.112769	2.92288	0.00346809	0.0232034	224.866	246.37	229.911	285.892	307.816	288.512
RBPMS	1322.78	-0.162761	0.0556875	-2.92276	0.00346941	0.0232034	1454.54	1364.51	1372.77	1273.25	1228.06	1243.53
NFX1	677.213	-0.220933	0.0755962	-2.92254	0.00347192	0.0232084	736.385	677.268	774.555	613.046	623.114	638.908
CSTB	1508.78	-0.163874	0.0560992	-2.92115	0.00348741	0.023295	1689.53	1498.17	1595.98	1398.02	1430.06	1440.89
FEM1A	1393.77	-0.162551	0.0556481	-2.92106	0.00348845	0.023295	1476.82	1495.18	1441.97	1286.02	1387.31	1275.31
KDELC1	351.13	-0.289215	0.0990261	-2.92059	0.00349368	0.023318	402.125	391	364.956	332.067	308.885	307.746
IDH2	1111.2	-0.172365	0.0590615	-2.91839	0.00351846	0.0234636	1193.21	1154.05	1186.39	1013.88	1044.22	1075.44
FKTN	504.848	0.250159	0.0857198	2.91833	0.00351908	0.0234636	459.861	486.755	435.268	563.924	566.467	516.813
TBC1D2B	548.497	-0.241618	0.0828171	-2.9175	0.00352855	0.0235147	589.513	602.459	592.635	518.732	457.449	530.194
FGF22	25.9892	-1.10958	0.380508	-2.91605	0.00354492	0.0236117	44.568	27.9286	34.5983	14.7367	10.6881	23.4155
CNOT7	1842.38	0.147105	0.050458	2.91539	0.00355248	0.02365	1759.42	1767.48	1716.52	2020.89	1933.47	1856.51
FGD3	587.203	0.233039	0.0799578	2.91453	0.00356228	0.0237031	542.919	524.658	553.572	600.275	625.252	676.54
TIGD5	753.023	-0.205796	0.0706323	-2.91363	0.00357256	0.0237504	849.831	803.944	765.626	692.625	701.137	704.973
TWNK	360.715	-0.283391	0.0972654	-2.91359	0.00357301	0.0237504	381.867	393.993	411.831	335.014	331.33	310.255
PTTG1IP	2576.05	-0.124227	0.0426534	-2.91247	0.00358587	0.0238237	2691.3	2730.02	2638.4	2499.34	2448.63	2448.59
WEE1	1060.67	-0.175055	0.0601107	-2.91222	0.00358875	0.0238307	1129.39	1088.22	1158.48	997.183	982.233	1008.54
KLF2	186.7	-0.411639	0.141359	-2.91201	0.00359111	0.0238342	215.75	179.541	244.42	163.086	163.527	153.873
APBB2	1350.38	0.182964	0.062903	2.90867	0.00362965	0.0240778	1201.31	1239.83	1352.68	1509.04	1466.4	1333.01
SIX2	198.176	-0.385807	0.132656	-2.90833	0.00363359	0.0240917	230.943	244.375	197.545	166.033	179.559	170.599
CHID1	599.899	-0.225707	0.0776399	-2.9071	0.00364795	0.0241746	619.901	637.37	683.037	556.065	561.123	541.901
LRRC58	36.5398	0.895365	0.308053	2.90653	0.00365467	0.0242068	25.3227	28.926	22.3215	57.9643	39.5458	45.1584
TFCP2L1	39.1929	-0.841197	0.289645	-2.90424	0.00368149	0.0243718	47.6067	47.8776	55.8037	27.5085	24.5825	31.7782
CLIP2	1224.09	-0.167781	0.0577741	-2.90408	0.00368331	0.0243718	1297.54	1249.8	1338.17	1187.78	1148.97	1122.27
HIGD2A	358.261	-0.285253	0.0982374	-2.90371	0.00368767	0.0243883	401.112	372.049	408.483	331.084	305.679	331.162
NUDC	2839.86	-0.130141	0.0448757	-2.90004	0.0037312	0.0246637	2909.08	2885.62	3112.73	2682.08	2662.4	2787.28
GPRC5C	242.103	-0.339908	0.117219	-2.89976	0.00373445	0.0246727	285.64	271.306	254.465	218.103	207.348	215.757
IRX1	196.093	-0.383813	0.132428	-2.89828	0.00375219	0.0247774	214.737	246.37	204.241	170.946	176.353	163.908
PALM3	46.9682	-0.768843	0.265345	-2.89753	0.00376119	0.0248242	53.6842	67.8266	55.8037	33.4032	38.477	32.6144
SBF2	1491	0.167924	0.0579662	2.89694	0.00376822	0.0248581	1353.25	1441.31	1418.53	1693.74	1503.81	1535.39
SLC25A19	304.36	0.303146	0.104677	2.89601	0.00377943	0.0249194	280.576	260.334	276.786	327.155	340.949	340.361
C5H12orf57	370.77	-0.292767	0.101116	-2.89537	0.00378709	0.024948	432.512	396.985	393.974	364.488	335.605	301.056
TIMM13	1373.14	-0.166046	0.0573497	-2.89533	0.00378759	0.024948	1475.81	1362.52	1518.98	1325.32	1275.09	1281.16
SERPINB6	1893.6	0.136083	0.0470113	2.89469	0.00379529	0.0249861	1811.08	1802.39	1800.23	1967.84	1973.02	2007.04
PRRG4	333.797	0.30292	0.104697	2.89331	0.00381211	0.0250842	325.144	306.217	264.509	380.207	361.256	365.449
CHMP1B	842.733	0.195413	0.0675839	2.89142	0.00383507	0.0252226	762.721	799.954	793.528	872.412	948.031	879.753
PDE4DIP	265.328	-0.341085	0.117984	-2.89093	0.00384099	0.0252488	273.486	301.23	314.733	262.313	224.449	215.757
AIMP1	1029.49	0.190494	0.065932	2.88925	0.00386159	0.0253715	1018.99	930.62	934.153	1032.55	1161.79	1098.86
PKM	44366.2	-0.0805762	0.027897	-2.88835	0.00387272	0.0254318	44632.8	45627.3	46559.2	43259.1	42426.3	43692.5
DNAJB5	43.3034	-0.793977	0.274946	-2.88776	0.00387993	0.0254663	62.8004	52.8648	49.1072	31.4383	30.9954	32.6144
LOC516599	10.9892	1.68128	0.582467	2.88648	0.00389579	0.0255575	5.06455	4.98725	5.58037	17.684	19.2385	13.3803
NCBP1	1172.53	0.17382	0.0602652	2.88424	0.00392358	0.025727	1053.43	1138.09	1112.72	1258.51	1285.77	1186.66
SYT11	1374.62	-0.164436	0.0570375	-2.88295	0.0039397	0.0258197	1415.03	1460.27	1481.03	1281.11	1373.42	1236.84
LOC107131247	100.648	0.527475	0.183001	2.88236	0.00394707	0.025855	88.1231	88.773	70.3126	111.999	117.569	127.113
LOC112444971	170.607	-0.424883	0.147433	-2.88187	0.0039532	0.0258822	183.337	219.439	183.036	128.7	167.803	141.329
TPI1	9179.51	-0.0909439	0.0315593	-2.88168	0.0039556	0.0258849	9504.13	9323.16	9581.49	8711.35	8920.26	9036.71
VDR	516.785	-0.242315	0.084105	-2.8811	0.00396294	0.0259199	575.333	539.62	566.965	471.574	444.623	502.597
USP24	1823.86	0.172572	0.0599321	2.87946	0.00398362	0.0260421	1563.93	1850.27	1731.03	2029.73	1844.76	1923.42
FAM83H	2785.31	-0.133005	0.0462229	-2.87746	0.00400893	0.0261945	3035.69	2778.89	2928.58	2584.82	2636.74	2747.14
MED23	549.748	0.240613	0.0836545	2.87627	0.00402402	0.0262799	500.377	496.73	516.742	613.046	541.885	629.709
[truncated: 15,015 more rows]

## Sheet: BL3.1 IFNG 4h vs UT
gene	baseMean	log2FoldChange	lfcSE	stat	pvalue	padj	BL3.1_UT_R1_merged	BL3.1_UT_R2_merged	BL3.1_UT_R3_merged	BL3.1_IFNG_4h_R1_merged	BL3.1_IFNG_4h_R2_merged	BL3.1_IFNG_4h_R3_merged
PARP14	4723.39	2.39019	0.0508803	46.9767	0	0	1410.74	1597.05	1527.59	8124.89	7848.82	7831.24
LOC783920	5113.59	3.91162	0.0558229	70.0719	0	0	641.245	637.07	633.554	9982.23	9377.02	9410.4
IRF8	4743.99	2.93807	0.048344	60.7743	0	0	1119.96	1088.05	1079.47	8388.59	8285.61	8502.25
STAT3	3259.09	2.296	0.0502769	45.667	0	0	1089.48	1113.23	1104.86	5520.42	5332.58	5394.01
STAT1	6321.04	2.74937	0.04672	58.8477	0	0	1574.54	1686.81	1645.69	11314.1	10801.9	10903.3
WARS	7051.45	3.57465	0.0490877	72.8215	0	0	1117.42	1091.34	1069.54	13238.3	12559	13233.1
TAP1	2813	3.24606	0.0608881	53.312	0	0	584.104	495.864	533.112	5131.56	5031.38	5101.95
LOC513659	1619.73	3.63057	0.0778077	46.6608	0	0	227.293	248.479	249.448	3029.64	2883.01	3080.48
LOC512486	6032.46	2.06911	0.0491053	42.1363	0	0	2224.67	2286.67	2452.54	10035.7	9364.79	9830.38
GBP4	3742.31	2.1769	0.0565755	38.4778	0	0	1234.24	1344.2	1483.44	6111.82	6157.25	6122.94
LOC781710	2564.67	4.66792	0.0797447	58.5358	0	0	165.073	211.262	203.09	4994.94	4861.34	4952.3
LOC507055	906.45	4.33416	0.114764	37.7658	0	0	90.1552	82.0967	84.9889	1667.21	1807.16	1707.09
ICAM1	1376.76	4.60751	0.101517	45.3866	0	0	110.472	105.084	110.375	2700.02	2545.14	2689.46
IRF1	3220.06	7.67135	0.167463	45.8093	0	0	34.2844	37.2172	23.1788	6543.67	6017.21	6664.82
DTX3L	1427.53	2.65918	0.0711141	37.3932	5.04374e-306	4.01481e-303	401.254	365.604	405.077	2552.88	2365.09	2475.25
P2RY6	915.099	3.96612	0.108848	36.4373	1.0937e-290	8.16175e-288	124.44	105.084	102.649	1743.64	1588.21	1826.56
SRRD	2155.39	1.89568	0.0547075	34.6513	4.27581e-263	3.00313e-260	924.408	889.928	924.945	3426.14	3414.27	3352.62
LOC788334	1252.44	2.49772	0.0773572	32.2882	1.02592e-228	6.80527e-226	384.747	351.374	395.143	2283.45	1992.77	2107.16
STAT2	1104.84	2.30812	0.0740477	31.1708	2.65375e-213	1.66767e-210	377.128	394.064	343.267	1867.85	1789.38	1857.34
LOC524576	735.271	2.85057	0.0925665	30.7948	3.0727e-208	1.8344e-205	190.469	167.477	179.912	1307.01	1302.58	1264.17
LTV1	2274.92	1.6423	0.054128	30.341	3.30444e-202	1.87881e-199	1055.2	1135.12	1119.2	3518.81	3393.15	3428.05
MX1	1101.71	2.09336	0.0704102	29.7309	3.06113e-194	1.66136e-191	427.92	418.146	409.492	1817.21	1761.59	1775.88
LAP3	1581.97	1.80246	0.0612025	29.4507	1.23216e-190	6.39651e-188	718.702	712.599	684.327	2537.6	2399.55	2439.04
SRGAP1	688.201	2.89088	0.0985129	29.3452	2.75499e-189	1.37061e-186	165.073	182.802	142.384	1258.29	1207	1173.66
OAS1X	531.26	3.71027	0.126754	29.2714	2.3971e-188	1.14485e-185	90.1552	67.8666	69.5364	986.949	1013.61	959.444
LOC101903126	576.645	5.33012	0.184019	28.9651	1.81334e-184	8.32743e-182	25.3958	27.3656	30.9051	1061.47	1152.54	1162.19
PLAGL1	1561.06	1.76968	0.0612558	28.8901	1.5918e-183	7.03928e-181	702.195	713.694	706.402	2372.31	2505.13	2366.63
RBBP8	3219.82	1.58375	0.056771	27.8972	2.88635e-171	1.23082e-168	1505.97	1617.85	1707.51	5025.51	4563.48	4898.6
SAMD9	508.758	3.42882	0.125811	27.2536	1.50466e-163	6.19506e-161	64.7593	107.273	84.9889	895.228	982.492	917.808
SBNO2	922.588	2.03648	0.0760475	26.7791	5.65932e-158	2.25241e-155	369.509	373.266	343.267	1449.37	1477.07	1523.04
LOC511531	544.473	3.00092	0.112427	26.6921	5.80869e-157	2.23728e-154	126.979	108.368	128.035	1045.23	910.25	947.979
B2M	3404.09	1.60585	0.0602766	26.6413	2.25772e-156	8.4241e-154	1535.18	1764.53	1745.03	5417.23	5143.63	4818.94
DDX58	605.349	2.62561	0.098593	26.6308	2.98986e-156	1.08179e-153	157.454	166.383	181.015	1055.74	1075.85	995.65
CSF1	409.462	4.608	0.177082	26.0219	2.79811e-149	9.82631e-147	31.7448	26.2709	38.6313	799.686	801.331	759.108
TRANK1	777.325	2.19984	0.0848576	25.9239	3.57924e-148	1.22103e-145	302.21	270.372	263.797	1240.14	1251.45	1335.98
RNF19B	511.124	2.79165	0.112586	24.7958	9.96165e-136	3.30395e-133	144.756	141.206	102.649	918.159	845.788	914.188
HPS4	1852.05	1.45118	0.0586809	24.73	5.08611e-135	1.6413e-132	1046.31	942.47	991.17	2701.93	2639.61	2790.84
LOC509283	1711.14	1.50329	0.061537	24.429	8.41176e-132	2.64306e-129	860.918	936.997	876.379	2439.19	2661.84	2491.54
TIFA	415.79	3.0431	0.126607	24.0358	1.17507e-127	3.59751e-125	88.8854	82.0967	98.234	740.45	793.551	691.524
PIK3C2B	1830.95	1.42732	0.0599099	23.8244	1.86586e-125	5.56959e-123	990.437	1018	970.198	2516.58	2727.42	2763.08
TARS	2430.33	1.37011	0.0575158	23.8215	1.99918e-125	5.82202e-123	1279.95	1386.89	1399.56	3673.59	3319.8	3522.19
LPIN2	2205.32	1.22065	0.0513976	23.7492	1.11886e-124	3.18075e-122	1320.58	1325.59	1325.61	3095.56	3113.08	3051.52
SLC16A7	1030.76	1.84024	0.0786888	23.3863	5.88998e-121	1.6355e-118	429.189	445.511	475.717	1716.89	1469.29	1647.95
GBP5	780.824	7.66442	0.329179	23.2834	6.52895e-120	1.77172e-117	6.34896	7.66236	8.83002	1539.18	1501.52	1621.4
LOC616254	420.995	2.66097	0.114753	23.1888	5.91305e-119	1.56893e-116	115.551	122.598	107.064	718.476	714.641	747.642
PARP9	625.005	2.12089	0.0929508	22.8173	3.08519e-115	8.00809e-113	227.293	212.357	260.486	1059.56	1009.17	981.168
PRKG1	362.414	2.8969	0.127797	22.668	9.27436e-114	2.35608e-111	85.076	85.3805	87.1964	620.068	632.396	664.37
LOC100847890	1503.87	1.39813	0.0619929	22.553	1.25462e-112	3.12086e-110	813.936	816.588	853.201	2206.06	2077.24	2256.2
CIITA	4768.92	1.0798	0.0485006	22.2637	8.31501e-110	2.02615e-107	3274.79	2954.39	2965.78	6449.08	6415.1	6554.39
EED	1144.3	1.47492	0.0668748	22.055	8.55969e-108	2.04405e-105	580.295	633.786	600.441	1650.97	1728.25	1672.09
LOC783680	1587.37	1.64017	0.0745522	22.0002	2.86499e-107	6.70744e-105	759.335	755.289	795.806	2657.02	2399.55	2157.24
TOP1	9604.46	1.03302	0.047329	21.8263	1.3066e-105	3.00016e-103	5891.83	6463.75	6556.29	13348.2	12677.9	12688.8
IFI16	434.046	2.651	0.121831	21.7597	5.59421e-105	1.26028e-102	91.425	129.165	134.658	816.884	721.309	710.834
EIF2AK2	2247.59	1.33946	0.0615808	21.7513	6.71526e-105	1.48482e-102	1152.97	1308.07	1353.2	3350.66	3228.66	3091.95
TRIM56	3346.04	0.988909	0.0460842	21.4587	3.78435e-102	8.21548e-100	2194.2	2241.79	2288.08	4430.28	4501.24	4420.68
FCGR2A	426.584	2.30491	0.10799	21.3438	4.45072e-101	9.48958e-99	137.137	145.585	147.903	723.253	685.744	719.885
ADAR	1989.03	1.16813	0.0547901	21.3201	7.38342e-101	1.54663e-98	1236.78	1265.38	1174.39	2707.66	2751.87	2798.08
LGALS3BP	1415.39	1.34623	0.0631649	21.313	8.59456e-101	1.76929e-98	812.666	829.724	757.174	2057.02	1952.76	2083.02
CASP7	458.808	2.36829	0.111469	21.2462	3.57282e-100	7.23041e-98	146.026	122.598	177.704	787.266	767.989	751.263
APOL3	759.313	1.79469	0.0849182	21.1343	3.8455e-99	7.65254e-97	340.304	342.617	336.644	1280.26	1098.08	1157.97
PHLDA1	392.983	2.28066	0.111758	20.4071	1.44592e-92	2.83022e-90	140.947	126.976	134.658	652.552	667.961	634.802
STRIP1	765.207	1.60939	0.0790833	20.3506	4.58841e-92	8.8364e-90	380.937	367.793	386.313	1148.41	1106.97	1200.81
PRKCH	2007.97	1.11647	0.0550048	20.2978	1.34522e-91	2.54952e-89	1231.7	1240.21	1330.02	2801.29	2699.63	2744.98
NRG2	328.085	2.54371	0.125942	20.1975	1.0302e-90	1.92197e-88	87.6156	100.705	99.3377	565.609	546.817	568.425
ZBP1	237.789	4.54181	0.225865	20.1085	6.2206e-90	1.14268e-87	21.5864	20.7978	16.5563	477.71	442.344	447.741
FERMT3	3418.6	0.99459	0.0498944	19.9339	2.06785e-88	3.74092e-86	2415.14	2212.23	2231.79	4445.57	4555.7	4651.19
NT5DC3	924.1	1.40355	0.0705296	19.9002	4.0513e-88	7.21977e-86	509.186	501.337	509.934	1365.3	1340.37	1318.48
NOTCH1	899.683	1.56371	0.0787289	19.862	8.68145e-88	1.52436e-85	463.474	444.417	456.954	1230.58	1429.28	1373.39
CD47	2344.17	1.19487	0.060239	19.8356	1.46863e-87	2.54137e-85	1285.03	1467.89	1517.66	3229.32	3367.59	3197.54
BAZ1A	1987.16	1.0939	0.055594	19.6766	3.42074e-86	5.83481e-84	1229.16	1292.75	1278.15	2793.65	2721.86	2607.4
CD180	389.874	2.18479	0.111282	19.633	8.08271e-86	1.35926e-83	132.058	141.206	147.903	665.928	617.947	634.199
LOC518495	2381.52	1.04174	0.0531922	19.5844	2.10101e-85	3.48417e-83	1503.43	1580.63	1584.99	3339.19	3143.09	3137.81
EPSTI1	1250.43	1.31729	0.0686324	19.1934	4.2014e-82	6.87188e-80	661.561	707.126	778.145	1848.74	1722.7	1784.33
IRF9	408.59	2.21647	0.115927	19.1196	1.73463e-81	2.79885e-79	156.184	140.112	139.073	598.093	702.415	715.661
LIMA1	1598.43	1.15893	0.0614806	18.8503	2.91934e-79	4.64758e-77	920.599	1007.05	1037.53	2266.26	2129.47	2229.65
MYPN	517.299	1.79543	0.0956199	18.7768	1.16989e-78	1.83796e-76	213.325	228.776	250.552	771.979	840.231	798.934
KYNU	1133.64	1.27423	0.0685637	18.5845	4.28649e-77	6.64685e-75	606.96	671.004	709.713	1622.3	1577.1	1614.76
TRIM5	829.722	1.37341	0.0745692	18.4179	9.43364e-76	1.44407e-73	449.506	446.606	488.962	1205.74	1211.44	1176.07
CDADC1	671.298	1.54402	0.0839803	18.3855	1.71662e-75	2.59449e-73	347.923	318.535	363.135	958.286	1008.05	1031.86
LRP10	893.925	1.2973	0.0711569	18.2316	2.89712e-74	4.32395e-72	537.122	512.283	503.311	1275.49	1253.68	1281.67
LCK	763.271	1.40068	0.0768669	18.2222	3.44059e-74	5.07168e-72	402.524	422.524	431.567	1138.86	1099.19	1084.96
PSMB9	541.266	1.75656	0.0985111	17.8311	4.05549e-71	5.90519e-69	286.973	247.385	209.713	859.878	809.111	834.536
UBA7	216.759	2.77358	0.158934	17.4512	3.36966e-68	4.84744e-66	55.8708	50.3526	59.6026	376.435	388.996	369.296
PHACTR2	1695.98	1.2582	0.0725995	17.3308	2.75698e-67	3.91884e-65	879.965	1125.27	990.066	2305.43	2521.8	2353.35
FNBP1	2853.58	0.817353	0.0474879	17.2118	2.16593e-66	3.0425e-64	2029.13	2092.92	2073.95	3673.59	3662.12	3589.77
IFI44L	380.43	1.8715	0.109857	17.0358	4.45681e-65	6.18772e-63	149.835	180.613	157.837	593.316	623.505	577.477
CXHXorf21	2836.46	0.824525	0.0484688	17.0114	6.7549e-65	9.27051e-63	1974.53	2067.74	2097.13	3663.08	3613.21	3603.05
PSMB10	556.374	1.57747	0.0927365	17.0102	6.8962e-65	9.35689e-63	317.448	269.277	253.863	817.839	823.559	856.259
IFIT2	390.004	1.78893	0.107485	16.6436	3.36701e-62	4.5171e-60	157.454	178.423	188.742	620.068	576.825	618.51
ERAP1	512.317	1.51327	0.0912416	16.5853	8.8964e-62	1.18026e-59	253.958	272.561	270.419	735.673	771.323	769.969
EXT1	366.058	1.7944	0.108738	16.5021	3.54574e-61	4.65233e-59	165.073	172.95	153.422	581.851	561.265	561.788
HERC4	1080.42	1.08242	0.067674	15.9946	1.39329e-57	1.80825e-55	647.593	725.735	704.194	1507.65	1437.06	1460.29
LOC512672	848.412	1.17108	0.0739005	15.8468	1.47981e-56	1.89988e-54	519.345	546.217	501.104	1137.91	1166.99	1218.92
RAB27A	1314.3	0.980237	0.0620208	15.805	2.87543e-56	3.65241e-54	841.872	877.887	931.567	1736	1744.92	1753.55
MPEG1	235.524	2.22087	0.140624	15.7929	3.48137e-56	4.37553e-54	88.8854	84.2859	77.2627	387.9	372.324	402.484
LGALS8	1839.59	0.926539	0.0589737	15.7111	1.27015e-55	1.57975e-53	1166.94	1302.6	1332.23	2452.56	2390.66	2392.58
RALGPS2	4971.81	0.807475	0.052008	15.526	2.31426e-54	2.84868e-52	3418.28	3712.96	3707.5	6466.28	6578.47	5947.35
IFIT5	1042.41	1.10091	0.0709302	15.521	2.50052e-54	3.04655e-52	628.547	679.76	676.6	1488.54	1442.62	1338.39
FCGR3A	360.886	1.82034	0.119993	15.1705	5.54772e-52	6.69089e-50	134.598	166.383	175.497	626.755	512.363	549.719
GKAP1	399.753	1.63409	0.108261	15.0939	1.77619e-51	2.12077e-49	163.803	199.221	219.647	631.533	585.716	598.597
GRAMD2B	558.674	1.32067	0.0878884	15.0266	4.91347e-51	5.8086e-49	302.21	322.914	332.229	835.992	772.434	786.262
CCDC86	742.686	1.15024	0.076739	14.989	8.6685e-51	1.01472e-48	491.409	443.322	450.331	1017.52	1039.17	1014.36
EMP1	653.596	1.21581	0.0819986	14.8272	9.77134e-50	1.13272e-47	374.588	406.105	398.455	959.242	884.687	898.498
ATAD1	2287.99	0.828623	0.0559757	14.8033	1.39536e-49	1.60198e-47	1565.65	1614.57	1761.59	3009.57	2916.36	2860.23
CDKN2AIP	418.635	1.47131	0.0996375	14.7666	2.40525e-49	2.73511e-47	224.753	222.208	218.543	644.908	604.61	596.786
LOC508153	1039.39	0.955359	0.0653227	14.6252	1.93932e-48	2.18448e-46	713.623	714.788	694.26	1369.12	1361.48	1383.05
NUB1	736.525	1.11649	0.0766183	14.5722	4.22366e-48	4.71313e-46	473.632	437.849	483.444	1010.83	1014.72	998.667
ZHX2	423.609	1.44164	0.0990438	14.5556	5.38326e-48	5.9515e-46	241.26	216.735	226.269	601.915	642.399	613.079
KIF15	1654.8	0.89637	0.0617041	14.5269	8.18202e-48	8.9627e-46	1051.39	1213.94	1200.88	2127.72	2187.27	2147.59
TBKBP1	197.41	2.39111	0.16526	14.4688	1.90694e-47	2.0699e-45	63.4896	59.1096	67.3289	279.938	356.765	357.83
PML	795.188	1.09348	0.076408	14.3111	1.86479e-46	2.00591e-44	521.884	521.04	479.029	1039.5	1139.2	1070.47
SP110	533.499	1.25857	0.0883451	14.2461	4.74261e-46	5.05596e-44	322.527	321.819	300.221	771.979	723.532	760.918
MAF	139.655	2.80448	0.196997	14.2362	5.46502e-46	5.77454e-44	39.3635	35.0279	30.9051	245.543	244.512	242.576
WDR25	164.268	2.41456	0.17195	14.0422	8.6009e-45	9.00831e-43	52.0614	55.8257	47.4614	271.339	293.414	265.507
VCPIP1	921.416	1.14758	0.0824326	13.9214	4.6941e-44	4.8737e-42	514.265	632.692	568.433	1196.19	1385.94	1230.99
MAPK6	2165.08	0.84281	0.061066	13.8016	2.49205e-43	2.56509e-41	1391.69	1653.97	1599.34	2804.16	2817.44	2723.86
OAS1Z	118.676	5.05588	0.366591	13.7916	2.86292e-43	2.92165e-41	11.4281	5.47311	4.41501	232.167	232.286	226.284
TRIM25	815.971	1.04715	0.0759456	13.7882	3.00281e-43	3.03844e-41	524.424	553.879	518.764	1030.9	1129.2	1138.66
ARHGAP31	2430.99	0.681019	0.0494059	13.7842	3.1736e-43	3.18427e-41	1884.37	1848.82	1870.86	3049.7	2938.58	2993.59
KANK4	3179.31	0.666688	0.048705	13.6883	1.19292e-42	1.18695e-40	2391.02	2413.64	2568.43	3935.37	3814.38	3953.03
LOC618733	812.738	1.01303	0.0744185	13.6127	3.36664e-42	3.32212e-40	540.931	523.229	550.772	1040.45	1140.31	1080.73
RAD1	943.521	0.96451	0.0710217	13.5805	5.22748e-42	5.11607e-40	613.309	664.436	636.865	1273.57	1284.8	1188.14
NAMPT	822.453	1.15034	0.0854285	13.4655	2.49484e-41	2.42182e-39	440.618	584.528	505.519	1172.3	1085.85	1145.9
CRLF3	1966.46	0.746494	0.0556978	13.4026	5.84073e-41	5.62406e-39	1466.61	1394.55	1546.36	2486	2417.33	2487.92
CD46	3297.83	0.723106	0.0543795	13.2974	2.39608e-40	2.28874e-38	2311.02	2543.9	2603.75	4263.08	4120.02	3945.19
PTGDR2	138.967	2.64413	0.199902	13.2271	6.11966e-40	5.79911e-38	41.9031	31.744	41.9426	267.518	204.501	246.197
PCMTD1	3394.31	0.690611	0.0523939	13.1811	1.12682e-39	1.05939e-37	2430.38	2697.15	2656.73	4225.82	4320.08	4035.7
MTHFD2	1194.75	0.881241	0.0671084	13.1316	2.17016e-39	2.02436e-37	794.889	830.818	896.247	1610.84	1477.07	1558.64
ERAP2	2205.2	0.792751	0.0605155	13.1	3.29395e-39	3.04882e-37	1497.08	1751.4	1588.3	2800.34	2898.57	2695.5
PAX5	10177.6	-0.491419	0.0377449	-13.0195	9.48099e-39	8.70793e-37	12073.2	11744.2	11870.9	8358.01	8418.98	8600.6
PTPN2	1008.5	0.884082	0.0681404	12.9744	1.70877e-38	1.55746e-36	709.813	725.735	688.742	1348.1	1325.92	1252.71
CREM	327.092	1.44919	0.111774	12.9654	1.92105e-38	1.73767e-36	158.724	191.559	174.393	487.264	482.355	468.257
GINS2	969.868	0.894977	0.0696197	12.8552	8.03876e-38	7.21675e-36	656.482	671.004	708.609	1219.12	1250.34	1313.65
DUSP7	2751.6	-0.675218	0.0527735	-12.7947	1.75642e-37	1.56505e-35	3593.51	3349.54	3209.71	2128.68	2129.47	2098.71
LOC616948	544.974	1.13334	0.089365	12.6821	7.42705e-37	6.56881e-35	342.844	329.481	353.201	777.712	692.412	774.193
CEBPG	1561.15	0.74552	0.0591989	12.5935	2.29384e-36	2.01386e-34	1141.54	1165.77	1194.26	2000.65	1858.29	2006.39
PSME2	846.922	0.89382	0.0717763	12.4529	1.34923e-35	1.1759e-33	572.676	595.475	609.271	1137.91	1069.18	1097.03
SOCS1	87.2428	4.30124	0.346657	12.4078	2.37178e-35	2.0521e-33	10.1583	6.56773	8.83002	161.466	157.821	178.614
LOC100298356	216.692	1.68537	0.136092	12.384	3.18968e-35	2.73991e-33	99.0437	99.6106	109.271	329.62	336.759	325.849
ZNFX1	815.746	0.891441	0.072613	12.2766	1.20956e-34	1.03158e-32	571.406	561.541	580.574	1027.08	1100.3	1053.58
ZC3HAV1	2614.98	0.621175	0.0520335	11.938	7.50197e-33	6.35273e-31	1935.16	2098.39	2144.59	3202.57	3165.31	3143.84
NMI	353.075	1.2806	0.107353	11.9289	8.36797e-33	7.03617e-31	190.469	221.114	206.402	495.863	479.02	525.582
SEMA4B	673.391	-0.956864	0.0811698	-11.7884	4.47846e-32	3.73936e-30	912.98	849.427	909.492	459.557	420.115	488.774
CD53	6559.57	0.482642	0.0409729	11.7795	4.9763e-32	4.12618e-30	5406.77	5499.38	5512.14	7825.84	7443.16	7670.12
CACNG4	1625.57	-0.719383	0.0613444	-11.727	9.2735e-32	7.63625e-30	2139.6	1927.63	2007.73	1202.87	1183.66	1291.93
MAFF	98.6355	2.69418	0.230035	11.7121	1.10543e-31	9.04031e-30	27.9354	24.0817	27.5938	165.288	162.267	184.648
IFIH1	88.4998	5.22237	0.445936	11.711	1.11891e-31	9.08825e-30	6.34896	4.37849	3.31126	186.307	168.935	161.718
TRIM21	375.345	1.1905	0.102114	11.6585	2.0766e-31	1.67531e-29	213.325	238.628	233.996	523.57	507.917	534.634
SNX16	171.838	1.81594	0.155834	11.653	2.21523e-31	1.77515e-29	72.3781	82.0967	72.8477	280.893	271.186	251.628
RAPGEF3	666.57	-0.919383	0.0792919	-11.5949	4.37273e-31	3.48069e-29	925.678	845.048	844.371	450.003	482.355	451.965
CMTR2	509.805	1.17561	0.101939	11.5325	9.04762e-31	7.15421e-29	264.117	315.251	355.408	705.1	762.432	656.525
SP140L	348.954	1.27808	0.110996	11.5147	1.11283e-30	8.74158e-29	226.023	204.694	181.015	467.2	529.034	485.756
SAMHD1	413.076	1.11631	0.0970775	11.4992	1.33205e-30	1.03953e-28	257.768	259.426	266.004	572.297	541.26	581.701
LOC781494	382.844	1.16362	0.101602	11.4528	2.27615e-30	1.76476e-28	233.642	247.385	228.477	547.456	501.249	538.858
PLCXD2	145.327	2.03899	0.178235	11.4399	2.64144e-30	2.03476e-28	62.2198	52.5419	56.2914	201.594	256.737	242.576
LOC112441507	308.701	1.2642	0.111038	11.3853	4.94811e-30	3.78721e-28	185.39	177.329	182.119	447.137	424.561	435.672
TFEC	183.564	1.71701	0.151041	11.3678	6.04924e-30	4.6005e-28	72.3781	100.705	82.7814	277.072	287.857	280.592
ICOSLG	1416.41	-0.687287	0.0607554	-11.3124	1.13975e-29	8.61304e-28	1843.74	1673.68	1724.06	1089.18	1106.97	1060.82
ST8SIA4	4030.59	-0.549933	0.0489836	-11.2269	3.00916e-29	2.25971e-27	4688.07	4727.67	4960.26	3194.92	3173.09	3439.52
RCSD1	5270.92	-0.472416	0.0420813	-11.2263	3.03007e-29	2.26119e-27	5980.72	6226.21	6174.39	4424.55	4335.64	4484.04
BIRC3	585.049	0.963146	0.086467	11.1389	8.11296e-29	6.01669e-27	365.7	414.862	406.181	782.489	809.111	731.953
PSMB8	1882.29	0.626637	0.056503	11.0903	1.39746e-28	1.02998e-26	1533.91	1465.7	1443.71	2355.11	2173.93	2321.37
GPC1	1887.14	-0.651749	0.0588484	-11.075	1.65801e-28	1.21452e-26	2488.79	2224.27	2208.61	1478.99	1450.4	1471.75
RBM43	357.105	1.20976	0.109493	11.0487	2.22519e-28	1.62005e-26	198.087	222.208	224.062	476.755	549.04	472.481
PARD3	1049.84	-0.758747	0.0692444	-10.9575	6.1151e-28	4.42511e-26	1276.14	1291.65	1390.73	834.082	741.315	765.142
SEH1L	2124.25	0.594076	0.0543471	10.9311	8.18137e-28	5.88467e-26	1617.71	1744.83	1711.92	2634.09	2562.93	2474.04
KIRREL1	552.699	0.993455	0.0909756	10.92	9.24839e-28	6.61232e-26	406.333	369.982	335.541	701.278	724.643	778.417
FAS	72.948	3.1684	0.29081	10.8951	1.21664e-27	8.64686e-26	19.0469	13.1355	12.1413	130.893	126.701	135.77
CASP4	339.244	1.18801	0.109263	10.8729	1.55124e-27	1.09597e-25	185.39	221.114	213.024	498.729	456.792	460.413
SDS	139.702	1.84415	0.17055	10.8129	2.98997e-27	2.10002e-25	57.1406	60.2042	65.1214	222.613	212.281	220.853
BMF	256.332	1.39255	0.128971	10.7973	3.54291e-27	2.47382e-25	153.645	118.219	153.422	393.633	346.762	372.313
TAPBPL	156.719	1.75597	0.163007	10.7723	4.65054e-27	3.22834e-25	77.4573	67.8666	70.6402	235.033	225.618	263.696
LOC786352	67.8895	3.38271	0.314873	10.7431	6.38673e-27	4.40795e-25	8.88854	12.0408	14.3488	121.338	130.036	120.685
IFI44	66.5436	3.74359	0.348629	10.738	6.74697e-27	4.62982e-25	8.88854	9.8516	8.83002	137.58	126.701	107.409
SPOCK2	807.69	-0.763801	0.0719657	-10.6134	2.58169e-26	1.76145e-24	1037.42	1023.47	986.755	584.717	629.062	584.718
SOCS3	64.7916	3.71907	0.350627	10.6069	2.76779e-26	1.87769e-24	6.34896	14.2301	6.62251	109.873	118.922	132.753
LOC516599	120.62	2.00228	0.188889	10.6003	2.97114e-26	2.00426e-24	52.0614	45.9741	46.3576	196.816	204.501	178.01
SLC1A4	1072.81	0.700098	0.0661443	10.5844	3.51983e-26	2.36105e-24	864.728	806.737	781.457	1344.28	1339.26	1300.38
TRIM34	347.505	1.14559	0.108508	10.5577	4.67779e-26	3.12027e-24	194.278	228.776	224.062	456.691	512.363	468.861
GIMAP7	213.277	1.44214	0.137013	10.5256	6.58526e-26	4.36822e-24	124.44	99.6106	120.309	323.887	314.531	296.885
KLF10	589.682	0.870468	0.0827714	10.5165	7.24919e-26	4.78207e-24	394.905	425.808	428.256	779.623	769.1	740.401
OSTF1	1761.31	0.594981	0.0565963	10.5127	7.5498e-26	4.953e-24	1339.63	1414.25	1454.75	2176.45	2060.57	2122.24
CD274	61.4433	4.34116	0.4173	10.403	2.40346e-25	1.56816e-23	10.1583	4.37849	3.31126	120.383	113.364	117.064
SFMBT2	280.852	1.19561	0.115551	10.347	4.31898e-25	2.80264e-23	161.263	174.045	176.6	383.123	391.219	398.863
CSNK1E	718.652	0.807197	0.0783551	10.3018	6.91711e-25	4.46434e-23	571.406	504.621	494.481	900.961	913.584	926.859
FCMR	5597.39	-0.467786	0.0454818	-10.2851	8.22225e-25	5.27816e-23	6318.48	6404.64	6772.63	4691.11	4556.81	4840.67
RIPK1	472.872	0.920783	0.0895486	10.2825	8.45134e-25	5.3962e-23	321.257	330.576	328.918	625.8	607.945	622.734
ABCG1	328.165	-1.06282	0.103639	-10.2551	1.12295e-24	7.13193e-23	453.315	441.133	437.086	211.148	214.503	211.802
FMNL3	791.516	-0.746321	0.0728462	-10.2452	1.24427e-24	7.86062e-23	991.707	992.822	993.377	617.201	552.374	601.614
TAP2	883.754	0.769992	0.0754893	10.2	1.98236e-24	1.24575e-22	711.083	629.408	619.205	1097.78	1176.99	1068.06
ZFP36L2	3441.14	-0.475263	0.0466613	-10.1854	2.30436e-24	1.44052e-22	3881.75	4055.58	4067.33	2821.35	2963.04	2857.82
SYVN1	2188.69	-0.608927	0.0600342	-10.143	3.55955e-24	2.21359e-22	2839.25	2600.82	2496.69	1640.46	1748.26	1806.65
MAN1A1	765.004	0.722614	0.0724524	9.97363	1.98825e-23	1.23003e-21	575.215	582.339	573.951	955.42	956.929	946.169
PJA2	1343.38	0.615423	0.0619978	9.92652	3.19198e-23	1.96455e-21	1060.28	1054.12	1072.85	1624.21	1545.98	1702.86
PMAIP1	174.646	1.454	0.147929	9.82903	8.4429e-23	5.16965e-21	87.6156	93.0429	99.3377	267.518	244.512	255.852
JAKMIP3	89.398	2.23634	0.229268	9.75424	1.76929e-22	1.07783e-20	27.9354	39.4064	26.4901	130.893	151.153	160.511
TES	819.049	0.718169	0.0736813	9.74696	1.90066e-22	1.15198e-20	605.69	633.786	618.101	1077.71	972.489	1006.51
CMTM6	2518.55	0.490594	0.0505012	9.71451	2.61511e-22	1.57699e-20	2118.01	2121.38	2040.84	2999.06	2987.49	2844.54
LOC100335642	221.101	1.31201	0.135136	9.70881	2.76537e-22	1.65922e-20	132.058	116.03	132.45	290.448	347.873	307.746
DDX3X	7145.45	0.448953	0.0462471	9.7077	2.79571e-22	1.66904e-20	5650.57	6247.01	6225.16	8339.86	8236.71	8173.38
NAPEPLD	920.786	0.660623	0.0681447	9.69442	3.18455e-22	1.89172e-20	685.687	725.735	727.373	1128.35	1143.65	1113.92
TPST2	1309.85	0.593036	0.0612614	9.68041	3.65238e-22	2.15888e-20	1071.7	1016.9	1045.25	1637.59	1532.64	1555.02
DR1	1554.05	0.623831	0.0644493	9.67942	3.68812e-22	2.16927e-20	1130.11	1291.65	1241.72	1922.3	1957.2	1781.31
LOC112449291	58.6709	3.26547	0.338074	9.65902	4.50162e-22	2.63477e-20	12.6979	13.1355	7.72627	102.23	88.9133	127.322
HAVCR2	399.67	0.948883	0.098422	9.64097	5.36768e-22	3.12634e-20	253.958	291.17	272.627	539.812	511.252	529.203
CTDSPL	130.944	1.69938	0.176355	9.63609	5.62923e-22	3.26277e-20	67.2989	62.3935	55.1876	214.969	201.166	184.648
MAP3K8	139.176	1.64586	0.171054	9.62186	6.46542e-22	3.72933e-20	59.6802	78.8128	62.9139	225.479	207.835	200.337
MMD	708.965	0.752461	0.0782251	9.61918	6.6358e-22	3.8092e-20	516.805	519.946	545.254	932.49	896.913	842.38
XRN2	1781.23	0.527963	0.0549184	9.61359	7.0066e-22	4.00281e-20	1456.45	1424.1	1494.48	2159.25	2097.24	2055.87
SP140	2302.47	0.527771	0.05504	9.58887	8.90557e-22	5.06345e-20	1813.26	1895.89	1947.02	2866.26	2617.39	2674.98
DRAM2	369.271	1.08939	0.113889	9.56535	1.1182e-21	6.32763e-20	203.167	253.952	248.344	557.965	499.026	453.171
CGAS	282.816	1.09509	0.114532	9.56145	1.16114e-21	6.53963e-20	190.469	172.95	177.704	384.079	394.553	377.14
PLEK	260.203	1.14968	0.120962	9.50448	2.01041e-21	1.12696e-19	166.343	174.045	144.592	356.372	365.656	354.21
SPATA6	539.509	0.845895	0.0893494	9.46727	2.87253e-21	1.60271e-19	405.063	389.686	362.031	652.552	744.649	683.076
LAMP3	440.506	0.87225	0.0922314	9.45719	3.16331e-21	1.75674e-19	314.908	317.44	301.324	576.118	569.045	564.202
INPP5A	659.62	0.774433	0.0818996	9.45588	3.20311e-21	1.77061e-19	502.837	482.728	472.406	863.7	862.459	773.59
GJA1	1004.18	0.630615	0.0668025	9.44	3.72793e-21	2.05122e-19	749.177	803.453	809.051	1216.25	1248.12	1199
ADPGK	595.166	0.789037	0.0836138	9.43669	3.8473e-21	2.10719e-19	424.11	438.944	443.708	792.999	757.986	713.247
SRSF10	3519.25	0.56223	0.0598252	9.39788	5.56727e-21	3.03531e-19	2519.27	3033.2	2969.09	4218.18	4200.04	4175.69
PODXL	1648.41	0.559819	0.0598962	9.34647	9.06183e-21	4.9181e-19	1335.82	1317.93	1348.79	1976.76	1843.84	2067.33
KANK1	1766.28	-0.527314	0.0564227	-9.34577	9.12214e-21	4.92843e-19	2114.2	2137.8	2001.1	1425.49	1507.08	1412.01
BATF2	134.567	7.86836	0.843569	9.32746	1.08439e-20	5.83227e-19	0	1.09462	2.2075	273.25	247.846	283.006
SEC14L1	3818.93	-0.435874	0.0471037	-9.25351	2.17249e-20	1.16321e-18	4530.61	4278.88	4366.44	3124.22	3332.03	3281.42
CISH	129.764	1.60249	0.173489	9.23686	2.53845e-20	1.35309e-18	57.1406	62.3935	72.8477	202.549	191.164	192.492
RNF31	491.777	0.842061	0.0914934	9.20351	3.4643e-20	1.83839e-18	382.207	353.563	322.296	652.552	611.279	628.768
GAB2	2645.66	0.466301	0.0507147	9.19459	3.76418e-20	1.98869e-18	2313.56	2194.72	2162.25	3082.18	2978.6	3142.63
CTSC	11461.1	-0.369584	0.0402388	-9.18476	4.12431e-20	2.16935e-18	12838.9	12958.1	12960.3	10375.9	9979.41	9654.18
KIAA0930	7212.32	-0.372831	0.040827	-9.13198	6.7257e-20	3.52215e-18	8317.13	8199.82	7902.87	6384.12	6181.7	6288.28
KLHL3	137.802	1.5428	0.169043	9.12669	7.06233e-20	3.68228e-18	76.1875	76.6236	58.4989	209.237	208.946	197.32
PIM1	67.2308	2.54001	0.278664	9.11494	7.8712e-20	4.08618e-18	12.6979	25.1763	20.9713	125.16	94.4704	124.909
TGIF1	187.609	1.31088	0.14402	9.1021	8.86022e-20	4.5797e-18	96.5041	109.462	116.998	245.543	278.965	278.179
RSL1D1	3791.36	0.482197	0.0532203	9.06039	1.29985e-19	6.68974e-18	2907.82	3276.2	3304.63	4494.3	4302.29	4462.92
TDRD7	245.85	1.1174	0.123428	9.05302	1.39065e-19	7.12632e-18	159.994	159.815	145.695	318.155	352.319	339.124
LOC112444653	987.748	-0.757352	0.0837056	-9.04781	1.45865e-19	7.44286e-18	1222.81	1250.06	1250.55	857.967	645.733	699.369
IL15RA	289.091	1.0367	0.114684	9.03959	1.57259e-19	7.99007e-18	193.008	204.694	171.082	379.302	391.219	395.243
RERE	2805.51	0.524705	0.0581791	9.01878	1.90192e-19	9.62245e-18	2432.92	2283.38	2187.64	3084.1	3502.07	3342.97
PPP2R5B	166.786	1.33954	0.148546	9.01767	1.92138e-19	9.67984e-18	99.0437	90.8537	93.819	243.632	235.62	237.749
FAM241A	147.098	1.48897	0.165159	9.01537	1.96203e-19	9.8431e-18	63.4896	90.8537	76.1589	220.702	225.618	205.768
MYO10	1192.4	-0.556896	0.0619506	-8.98936	2.48676e-19	1.24234e-17	1412.01	1448.19	1396.25	997.458	965.821	934.704
EHD3	1184.71	-0.553952	0.0616893	-8.97972	2.71466e-19	1.35054e-17	1452.64	1386.89	1391.83	948.732	945.815	982.374
GPD1L	1143.82	-0.565206	0.063044	-8.96527	3.09533e-19	1.53354e-17	1377.72	1313.55	1406.18	925.802	901.359	938.324
ATP9A	313.483	1.02474	0.114673	8.93621	4.02747e-19	1.98711e-17	224.753	212.357	182.119	435.671	436.787	389.209
TNF	64.265	2.48534	0.278345	8.92898	4.29973e-19	2.1127e-17	21.5864	17.514	19.8675	111.784	91.1361	123.702
LRTM2	119.971	-1.60365	0.180616	-8.87879	6.75903e-19	3.30749e-17	187.929	183.897	172.185	46.8156	57.7936	71.204
MAP3K1	8445.45	0.381817	0.0430451	8.87016	7.30425e-19	3.5597e-17	6981.31	7526.62	7488.96	9501.65	9757.12	9417.04
ARID5A	209.684	1.25536	0.141718	8.8581	8.1386e-19	3.9502e-17	144.756	112.746	114.79	263.696	323.422	298.695
TAPBP	4172.75	0.396761	0.0448458	8.84723	8.97148e-19	4.33682e-17	3723.03	3598.02	3486.75	4762.77	4785.76	4680.16
FTSJ1	537.456	0.745567	0.0847218	8.80019	1.3659e-18	6.57615e-17	389.826	410.483	402.87	685.036	682.41	654.112
SLC38A3	1310.88	-0.553932	0.0630376	-8.78733	1.53152e-18	7.34391e-17	1658.35	1555.46	1465.78	1058.61	1068.07	1059.01
LOC100139670	56.5567	2.58958	0.296003	8.7485	2.16217e-18	1.03265e-16	16.5073	17.514	14.3488	105.096	91.1361	94.7376
IL2RA	49.0683	3.10324	0.355682	8.72477	2.66732e-18	1.26884e-16	5.07916	10.9462	14.3488	91.7203	73.3535	98.9616
GRAMD1B	946.482	-0.61242	0.0703359	-8.70708	3.11808e-18	1.47738e-16	1155.51	1107.76	1175.5	732.807	710.195	797.123
NOTCH2	1277.19	0.544816	0.0626624	8.69445	3.48504e-18	1.64472e-16	1067.89	1047.55	1002.21	1444.59	1561.54	1539.33
IFNAR2	716.587	0.738521	0.0851953	8.66856	4.37606e-18	2.04962e-16	524.424	572.488	513.245	994.592	839.119	855.655
CCR6	246.819	-1.03569	0.119476	-8.66853	4.37734e-18	2.04962e-16	316.178	346.995	332.229	171.02	153.375	161.114
CX3CR1	662.632	-0.695723	0.0804402	-8.64895	5.19775e-18	2.42426e-16	784.731	848.332	820.088	502.551	544.594	475.498
GABARAPL1	1070.58	0.597019	0.0691075	8.639	5.67096e-18	2.63468e-16	834.253	802.358	918.322	1337.59	1277.02	1253.92
RUNX1	3918.83	0.415514	0.0481578	8.62817	6.23419e-18	2.87399e-16	3450.02	3315.61	3309.05	4288.88	4676.84	4472.58
OGFR	763.227	0.677764	0.0785493	8.62852	6.21526e-18	2.87399e-16	647.593	580.15	536.424	951.598	918.03	945.566
TLR4	716.871	0.680605	0.0792274	8.59052	8.65752e-18	3.9758e-16	509.186	587.812	554.084	926.757	850.233	873.155
MAPK1IP1L	2344.99	0.483782	0.0564323	8.57278	1.01021e-17	4.62141e-16	1878.02	2078.69	1906.18	2630.27	2860.79	2716.01
RFLNB	455.79	-0.768241	0.0899729	-8.53858	1.35879e-17	6.19236e-16	565.057	560.447	596.026	347.773	338.982	326.452
NR2F1	200.321	1.14129	0.133722	8.5348	1.40402e-17	6.37416e-16	123.17	125.882	125.828	278.983	272.297	275.765
NUCB1	1731.86	0.529596	0.0623528	8.49355	2.00422e-17	9.06454e-16	1514.86	1387.98	1353.2	2160.2	1930.53	2044.4
DIP2B	2869.21	0.404033	0.0476291	8.48291	2.19626e-17	9.8956e-16	2434.19	2489.17	2483.44	3341.1	3276.46	3190.91
SHCBP1	1290.15	0.567768	0.0669755	8.47725	2.30587e-17	1.03504e-15	986.628	1131.84	997.792	1481.86	1600.44	1542.35
LOC101904939	821.615	-0.603472	0.0713022	-8.46359	2.59272e-17	1.15944e-15	945.994	992.822	1033.11	640.131	663.516	654.112
PNP	1669.79	0.514534	0.0608344	8.45795	2.72127e-17	1.21239e-15	1391.69	1277.42	1459.16	1967.21	1907.19	2016.04
FAM177A1	439.512	0.82432	0.0975222	8.45264	2.84792e-17	1.26409e-15	298.401	309.778	343.267	602.87	524.589	558.167
MGC157082	267.077	1.01476	0.12045	8.42476	3.6149e-17	1.59859e-15	181.58	170.761	179.912	335.352	345.65	389.209
GDI2	5085.83	0.375533	0.0445936	8.42123	3.72538e-17	1.64137e-15	4356.65	4531.74	4395.14	5938.89	5543.74	5748.82
DOC2B	715.287	-0.637057	0.0756975	-8.41583	3.90128e-17	1.71255e-15	862.188	835.197	912.803	573.252	564.599	543.685
PTPRJ	1818.47	0.471919	0.0560851	8.41434	3.95116e-17	1.72809e-15	1509.78	1553.27	1506.62	2218.48	2058.34	2064.31
PRMT9	567.801	0.733052	0.0871857	8.40794	4.17272e-17	1.81833e-15	382.207	443.322	452.539	739.495	686.855	702.386
USP18	59.9605	2.31999	0.276295	8.39679	4.58851e-17	1.99225e-15	25.3958	18.6086	16.5563	96.4974	98.9161	103.789
IKZF2	340.572	0.909016	0.108356	8.38913	4.89751e-17	2.1187e-15	220.944	257.236	229.581	439.493	476.798	419.38
RNASEL	122.897	1.45502	0.173891	8.36744	5.88822e-17	2.5381e-15	66.0291	67.8666	62.9139	180.574	185.607	174.39
LOC522540	199.47	1.14016	0.136316	8.36414	6.05537e-17	2.60076e-15	126.979	133.544	112.583	279.938	280.077	263.696
MORC3	401.546	0.853605	0.102179	8.35401	6.5982e-17	2.82374e-15	267.926	317.44	270.419	516.882	549.04	487.567
RHOBTB2	503.165	-0.731896	0.0876468	-8.35052	6.79637e-17	2.89817e-15	620.928	665.53	599.338	384.079	362.322	386.795
CHORDC1	1078.84	0.536095	0.0644004	8.3244	8.47592e-17	3.60151e-15	845.681	884.455	911.7	1278.35	1260.35	1292.53
VASP	1648.28	-0.48037	0.0578824	-8.29907	1.04933e-16	4.44292e-15	2027.86	1878.37	1858.72	1376.76	1342.59	1405.37
LFNG	873.026	-0.649373	0.0783246	-8.29079	1.12498e-16	4.74639e-15	1173.29	982.971	1040.84	664.017	723.532	653.508
C1RL	74.7928	2.00521	0.242036	8.28475	1.18358e-16	4.97604e-15	26.6656	39.4064	23.1788	128.982	112.253	118.271
BRIX1	617.805	0.683767	0.0826417	8.27388	1.29671e-16	5.43253e-15	466.013	452.079	505.519	778.667	721.309	783.244
DDX21	4543.85	0.373741	0.0452081	8.26712	1.3723e-16	5.72912e-15	3786.52	4082.94	4002.21	5204.17	5120.3	5066.95
F2R	113.642	1.50992	0.183454	8.23051	1.86416e-16	7.75541e-15	59.6802	53.6365	64.0176	155.733	175.604	173.183
RELL1	693.695	0.671958	0.0816675	8.22797	1.9042e-16	7.89451e-15	486.33	561.541	552.98	851.279	900.247	809.795
CARD11	1674.14	-0.461028	0.0560434	-8.22628	1.93124e-16	7.97891e-15	2022.78	1896.98	1901.77	1419.75	1377.04	1426.49
LBH	2899.31	-0.390036	0.0474803	-8.21469	2.12714e-16	8.75796e-15	3357.33	3187.54	3323.4	2533.77	2481.79	2512.05
TFIP11	525.829	-0.685972	0.0835583	-8.2095	2.22114e-16	9.11353e-15	662.831	650.206	633.554	403.187	397.887	407.311
ANO6	1555.56	0.469142	0.0571785	8.20486	2.30855e-16	9.43976e-15	1282.49	1287.28	1346.58	1807.65	1760.48	1848.89
LOC101906312	110.105	1.52019	0.18541	8.19908	2.42227e-16	9.85455e-15	50.7916	63.4881	56.2914	163.377	158.933	167.752
RAPGEF5	3174.53	0.382063	0.0465995	8.19887	2.4265e-16	9.85455e-15	2709.73	2747.5	2814.57	3544.61	3556.53	3674.25
PLEKHA2	2675.91	-0.439123	0.0537283	-8.17303	3.00729e-16	1.21719e-14	2887.51	3257.6	3090.51	2272.94	2310.63	2236.29
AHCYL1	1822.6	0.433339	0.0530359	8.17067	3.0669e-16	1.23712e-14	1559.3	1533.57	1560.71	2059.89	2108.36	2113.79
RANBP2	5201.9	0.366693	0.044946	8.15853	3.39139e-16	1.36341e-14	4322.37	4612.74	4693.16	5854.81	5929.41	5798.91
LOC107131209	50.088	2.63974	0.32368	8.15541	3.47992e-16	1.3943e-14	16.5073	8.75698	16.5563	72.6119	95.5818	90.5136
CCDC85C	968.6	-0.534624	0.065583	-8.15186	3.58366e-16	1.43107e-14	1170.75	1147.16	1120.31	802.553	785.771	785.055
ARHGAP27	1221.03	0.535652	0.0657974	8.14094	3.9222e-16	1.56104e-14	1028.53	930.429	1033.11	1377.72	1487.08	1469.34
C19H17orf58	164.357	1.25883	0.155315	8.105	5.27448e-16	2.09227e-14	113.011	99.6106	78.3664	233.122	241.177	220.853
CRK	1248.94	0.517638	0.0639753	8.09122	5.90719e-16	2.33549e-14	967.581	1027.85	1083.88	1521.03	1449.29	1443.99
RTN4	3185.2	0.386061	0.0478289	8.07171	6.93197e-16	2.73161e-14	2661.48	2758.45	2862.03	3672.63	3584.32	3572.27
STAT4	65.8075	2.04382	0.254406	8.0337	9.45793e-16	3.71473e-14	29.2052	25.1763	23.1788	111.784	94.4704	111.03
LOC510382	79.5105	9.55068	1.1897	8.02783	9.92081e-16	3.88375e-14	0	0	0	149.046	164.49	163.528
FAM53B	1640.79	-0.503592	0.0628372	-8.01424	1.10824e-15	4.3243e-14	2087.54	1855.38	1832.23	1301.28	1393.72	1374.6
USP25	248.635	0.95732	0.121329	7.89028	3.01507e-15	1.17263e-13	167.612	170.761	167.77	344.907	331.202	309.557
KLF6	696.028	0.618389	0.0785849	7.86906	3.57327e-15	1.38522e-13	524.424	533.081	587.196	860.833	860.236	810.399
AHDC1	846.543	-0.606759	0.0771197	-7.86775	3.6107e-15	1.3952e-13	1119.96	996.106	951.435	635.354	695.747	680.662
NAV1	1183.85	-0.517063	0.0657278	-7.86673	3.64017e-15	1.40205e-13	1481.85	1391.27	1311.26	942.044	978.046	998.667
FOXP1	1930.69	-0.425353	0.0544546	-7.81115	5.66663e-15	2.17555e-13	2219.59	2117	2302.43	1627.08	1674.9	1643.12
PICALM	2096.94	0.439382	0.0564421	7.78464	6.99137e-15	2.67555e-13	1658.35	1859.76	1818.98	2486.96	2372.87	2384.73
CARS	1021.35	0.50254	0.0646547	7.77267	7.68484e-15	2.93153e-13	835.523	849.427	850.993	1217.2	1174.77	1200.21
ZNF395	397.308	-0.742162	0.0959904	-7.73163	1.06175e-14	4.03736e-13	479.981	493.675	517.66	314.333	286.745	291.454
TRIM38	271.675	0.903298	0.116852	7.73029	1.07306e-14	4.06741e-13	168.882	202.505	195.364	362.104	351.208	349.986
ZNF318	2142.71	-0.397351	0.051432	-7.72577	1.11182e-14	4.20101e-13	2434.19	2420.21	2458.06	1847.78	1791.6	1904.41
DDX6	5361.42	0.457166	0.0592569	7.71499	1.20989e-14	4.55714e-13	4011.27	4676.23	4863.13	6259.91	6319.51	6038.46
STK3	493.169	0.720894	0.0937106	7.69277	1.43986e-14	5.40627e-13	354.272	382.023	379.691	676.437	581.271	585.321
CERS5	1230.79	0.48057	0.0624936	7.68991	1.47234e-14	5.5109e-13	1057.74	1042.08	985.651	1463.7	1383.71	1451.84
MITD1	175.386	1.17312	0.152891	7.6729	1.68152e-14	6.27417e-13	88.8854	102.895	131.347	240.766	228.952	259.472
GSE1	910.188	-0.550089	0.0718406	-7.65707	1.90227e-14	7.07573e-13	1116.15	1079.3	1048.56	685.991	791.328	739.798
BCOR	4201.53	-0.327111	0.042931	-7.61947	2.54716e-14	9.44504e-13	4774.41	4664.19	4589.4	3739.51	3728.8	3712.87
CHD4	8750.79	-0.289093	0.0380188	-7.60393	2.87264e-14	1.0619e-12	9738.03	9599.84	9538.63	7750.37	7913.28	7964.59
LOC785873	786.552	0.546206	0.0718697	7.59996	2.96222e-14	1.09163e-12	629.816	643.638	645.695	913.381	929.144	957.634
HIF1A	2776.32	0.397208	0.0525007	7.56576	3.85595e-14	1.41662e-12	2239.91	2502.31	2444.81	3212.12	3105.3	3153.49
PLEKHO1	1651.6	0.454476	0.0600906	7.56318	3.93329e-14	1.4406e-12	1497.08	1331.06	1357.62	1890.78	1868.29	1964.75
ADM5	69.4753	1.79188	0.23762	7.54093	4.6663e-14	1.70384e-12	33.0146	31.744	28.6976	106.052	111.142	106.203
DHX58	75.3584	1.76805	0.234646	7.53497	4.88444e-14	1.77805e-12	24.126	38.3118	39.7351	106.052	117.81	126.116
SPATA13	2424.69	0.392865	0.0522447	7.51971	5.48984e-14	1.99236e-12	2190.39	2057.89	2044.15	2656.07	2805.21	2794.46
MOB3A	2094.04	-0.392975	0.052367	-7.50424	6.17847e-14	2.23548e-12	2415.14	2293.23	2424.94	1852.56	1777.15	1801.22
CACNA1A	154.821	1.24161	0.165581	7.49852	6.45419e-14	2.32819e-12	90.1552	107.273	78.3664	185.351	244.512	223.267
MED13	3229.74	0.451386	0.0602379	7.49338	6.71198e-14	2.41389e-12	2476.09	2839.45	2863.13	3623.91	3972.2	3603.65
VPS54	465.784	0.718477	0.0959258	7.48993	6.8912e-14	2.4709e-12	311.099	369.982	371.965	576.118	614.613	550.926
STX11	304.107	0.859893	0.114828	7.48854	6.96436e-14	2.48965e-12	243.8	215.641	189.845	413.697	377.882	383.778
PLCL2	1221.77	0.483752	0.0646944	7.4775	7.57503e-14	2.69988e-12	1024.72	1019.09	1013.24	1517.21	1350.37	1405.98
PTPN21	740.805	-0.557134	0.0745802	-7.47027	8.00331e-14	2.84403e-12	916.789	888.833	842.163	576.118	609.056	611.872
CLEC2B	73.5119	1.78151	0.238555	7.46791	8.14766e-14	2.88674e-12	26.6656	39.4064	33.1126	97.4528	118.922	125.512
NOL4L	700.223	-0.569782	0.0763092	-7.46675	8.21981e-14	2.90368e-12	820.285	810.021	878.587	545.545	585.716	561.184
CD164	15240.2	0.372338	0.050049	7.43947	1.01093e-13	3.56062e-12	12186.2	13834.9	13824.5	17126.9	17714.9	16754.1
SCIN	82.6027	1.67248	0.225786	7.40735	1.28852e-13	4.52497e-12	52.0614	39.4064	27.5938	116.561	134.481	125.512
BPNT1	308.36	0.859204	0.116074	7.4022	1.33942e-13	4.68992e-12	198.087	234.249	224.062	443.315	367.879	382.571
AKAP2	1974.21	0.393573	0.053369	7.37456	1.64886e-13	5.75653e-12	1644.38	1737.17	1736.2	2298.74	2210.61	2218.19
RYK	1318.96	-0.511744	0.0694884	-7.36445	1.77883e-13	6.1922e-12	1406.93	1604.72	1634.66	1150.33	1085.85	1031.25
SARS	2073.03	0.391303	0.0531385	7.36383	1.7871e-13	6.2029e-12	1869.13	1721.84	1792.49	2378.04	2317.3	2359.39
KLF13	183.056	1.0598	0.144079	7.35564	1.90012e-13	6.57606e-12	113.011	120.408	121.413	272.295	246.734	224.474
MKNK2	2562.55	-0.40752	0.0554259	-7.35251	1.94523e-13	6.71274e-12	3080.51	2876.67	2812.36	2076.13	2266.18	2263.44
FAM129A	2625.66	-0.377949	0.0514902	-7.34022	2.13251e-13	7.31671e-12	2816.4	2993.79	3089.4	2250.01	2330.64	2273.7
CASP8	733.967	0.614734	0.0837461	7.34046	2.12866e-13	7.31671e-12	509.186	593.285	633.554	931.534	890.244	846.001
POLD4	503.109	-0.679182	0.0926018	-7.33444	2.2265e-13	7.61731e-12	652.673	620.651	589.404	403.187	341.205	411.535
CDC123	549.582	0.604541	0.0827974	7.30145	2.84679e-13	9.71161e-12	425.38	434.565	448.123	663.061	660.181	666.18
LOC512440	65.3673	1.81431	0.248631	7.2972	2.93822e-13	9.99498e-12	22.8562	33.9333	29.8013	106.052	93.359	106.203
LOC510185	44.8442	8.72395	1.19823	7.2807	3.32102e-13	1.1265e-11	0	0	0	96.4974	84.4676	88.0999
BCL3	32.4819	5.04113	0.693749	7.2665	3.68908e-13	1.24781e-11	2.53958	2.18924	1.10375	59.236	62.2393	67.5835
RASA1	6354.9	-0.316151	0.043523	-7.26399	3.75846e-13	1.26768e-11	6733.7	7266.1	7140.17	5697.17	5716.01	5576.24
PSMA2	1543.83	0.420627	0.0579398	7.25972	3.87905e-13	1.30467e-11	1301.54	1291.65	1369.76	1790.46	1707.14	1802.43
TAGAP	826.808	0.532045	0.0738671	7.20274	5.90165e-13	1.97937e-11	726.321	677.571	625.828	992.681	966.932	971.513
NOL9	1557.93	0.40932	0.0569915	7.18212	6.86396e-13	2.29568e-11	1389.15	1320.11	1306.84	1742.69	1810.5	1778.29
RB1	2422.47	0.417423	0.0583238	7.15698	8.24727e-13	2.75062e-11	1889.45	2200.19	2129.14	2716.26	2846.34	2753.42
LRRTM3	124.734	-1.17878	0.164941	-7.14663	8.8931e-13	2.95776e-11	165.073	179.518	173.289	79.2999	80.022	71.204
ENTPD1	31.1045	4.9758	0.69734	7.1354	9.65031e-13	3.20068e-11	1.26979	0	4.41501	64.0131	57.7936	59.1356
DGKZ	2595.79	-0.373735	0.0524612	-7.12403	1.04815e-12	3.46673e-11	3005.6	2994.89	2792.49	2168.8	2300.63	2312.32
FOS	658.768	0.567601	0.0797292	7.11911	1.08628e-12	3.58292e-11	539.661	561.541	491.17	771.024	803.554	785.658
POU2AF1	2846.91	-0.337397	0.0475078	-7.10192	1.23035e-12	4.04694e-11	3226.54	3125.15	3183.22	2582.5	2477.35	2486.71
ARHGEF2	1714.29	-0.384503	0.054202	-7.09388	1.30399e-12	4.27736e-11	1991.03	1909.02	1923.84	1471.35	1511.53	1478.99
ALAS1	971.787	0.478472	0.0676218	7.07571	1.48688e-12	4.86394e-11	859.649	797.98	780.353	1114.98	1140.31	1137.45
ASNSD1	1629.15	0.454495	0.064337	7.06428	1.61452e-12	5.2527e-11	1264.71	1386.89	1466.89	1963.39	1903.86	1789.15
GZMA	33.1664	5.40219	0.764719	7.06428	1.61446e-12	5.2527e-11	1.26979	3.28387	0	65.924	63.3507	65.1698
IFI35	169.508	1.02991	0.145957	7.05625	1.71059e-12	5.55012e-11	104.123	107.273	122.517	239.81	220.06	223.267
C4A	46.6387	2.17328	0.308231	7.05082	1.77861e-12	5.75517e-11	19.0469	12.0408	19.8675	68.7902	82.2448	77.8417
RELT	248.315	0.85135	0.121174	7.02582	2.12805e-12	6.86728e-11	189.199	183.897	158.94	314.333	320.088	323.435
ARAP2	2314.43	0.426256	0.0607478	7.01682	2.26978e-12	7.30489e-11	1785.33	1993.31	2142.38	2692.37	2650.73	2622.48
WASHC4	1276.21	0.454607	0.0648762	7.0073	2.42967e-12	7.79847e-11	998.056	1121.99	1105.96	1447.46	1540.42	1443.39
TBXA2R	304.677	-0.74929	0.106988	-7.00349	2.49666e-12	7.99198e-11	392.365	365.604	387.417	234.078	228.952	219.646
B3GALT5	140.466	-1.08648	0.155143	-7.00309	2.50378e-12	7.99336e-11	194.278	183.897	195.364	96.4974	82.2448	90.5136
MCF2L	1176.06	-0.517052	0.0739049	-6.99618	2.63029e-12	8.37484e-11	1461.53	1354.05	1343.27	860.833	989.161	1047.54
LOC101905262	27.5107	3.75109	0.536694	6.98925	2.76366e-12	8.77608e-11	1.26979	3.28387	6.62251	53.5035	46.6795	53.7047
PNPT1	457.095	0.629496	0.0902549	6.97465	3.06643e-12	9.71171e-11	355.542	367.793	352.097	557.01	571.268	538.858
WDR24	857.348	0.522724	0.0750102	6.9687	3.19883e-12	1.01042e-10	779.652	665.53	668.874	997.458	1009.17	1023.41
CREBRF	174.315	1.03629	0.149709	6.92202	4.45254e-12	1.40273e-10	97.7739	133.544	111.479	220.702	228.952	253.438
IL16	406.574	-0.690419	0.0997596	-6.92083	4.49011e-12	1.41084e-10	544.74	465.215	500	311.467	286.745	331.28
FAM43A	437.066	-0.630907	0.0912793	-6.91183	4.78453e-12	1.49941e-10	533.312	546.217	512.141	344.907	354.542	331.28
MYOM1	691.928	0.537904	0.0778418	6.91023	4.83875e-12	1.51243e-10	556.169	530.892	605.96	824.527	815.78	818.243
CD79B	1065.91	-0.458298	0.0663714	-6.90506	5.01833e-12	1.56446e-10	1264.71	1180	1259.38	932.49	851.345	907.55
KLHL6	610.232	-0.579239	0.0840475	-6.89181	5.50867e-12	1.71285e-10	680.608	747.627	766.004	518.793	452.346	496.015
IRF3	1480.32	0.408392	0.0594561	6.86879	6.47467e-12	2.00799e-10	1323.12	1293.84	1201.99	1709.25	1652.68	1701.05
HDAC1	1727.9	0.3995	0.0581946	6.86491	6.65353e-12	2.05811e-10	1502.16	1472.27	1497.79	2075.17	1858.29	1961.73
RASGEF1A	205.431	0.898267	0.130891	6.86271	6.75659e-12	2.08113e-10	137.137	144.49	147.903	274.206	271.186	257.662
IER2	1078.66	0.46106	0.0671846	6.86258	6.76279e-12	2.08113e-10	973.93	895.401	856.512	1219.12	1259.23	1267.79
R3HDM4	404.508	0.696029	0.101466	6.85975	6.89826e-12	2.11736e-10	347.923	279.129	300.221	478.665	525.7	495.411
AFAP1L2	400.138	0.678593	0.0992046	6.84034	7.90039e-12	2.41874e-10	300.941	304.305	318.984	522.615	450.124	503.859
RASSF5	2243.58	-0.350834	0.0513511	-6.83206	8.37045e-12	2.55609e-10	2510.38	2558.13	2481.24	1982.5	1900.52	2028.71
LOC522763	77.7656	1.50903	0.221077	6.82579	8.7442e-12	2.66341e-10	34.2844	39.4064	47.4614	107.962	115.587	121.892
KIF2C	1020.21	0.456441	0.0668983	6.82292	8.92099e-12	2.71035e-10	844.411	874.603	864.238	1161.79	1139.2	1237.02
DUSP2	231.55	-0.827946	0.121416	-6.81911	9.16084e-12	2.77615e-10	312.369	283.507	292.494	166.243	171.158	163.528
MAP2K1	1795.74	0.373281	0.0547502	6.8179	9.23796e-12	2.79244e-10	1584.7	1499.63	1611.48	2017.85	2012.77	2048.02
VPS36	1375.36	0.403753	0.0592983	6.80885	9.83847e-12	2.96645e-10	1146.62	1219.41	1183.22	1569.75	1600.44	1532.7
DNAJB5	373.218	-0.674919	0.0995445	-6.78007	1.20117e-11	3.61259e-10	473.632	434.565	471.302	276.116	278.965	304.729
TLE4	1078.97	-0.439423	0.0648466	-6.77634	1.23258e-11	3.69775e-10	1259.63	1285.09	1183.22	924.846	893.579	927.463
CHN2	603.901	-0.539628	0.079682	-6.77227	1.26778e-11	3.79382e-10	692.036	707.126	746.137	485.353	504.583	488.17
MCAM	1305.59	-0.450038	0.0665569	-6.7617	1.36382e-11	4.071e-10	1621.52	1441.62	1459.16	1168.48	1082.52	1060.22
MFHAS1	639.024	-0.544191	0.0804994	-6.7602	1.37806e-11	4.10324e-10	770.763	712.599	791.391	547.456	499.026	512.91
IFI47	34.1202	5.8561	0.869274	6.73676	1.61954e-11	4.81028e-10	2.53958	0	1.10375	64.9686	73.3535	62.7561
CSK	4370.23	-0.325032	0.0482589	-6.73517	1.63735e-11	4.85112e-10	5127.42	4705.78	4751.65	3755.76	3942.19	3938.55
SMAP1	1592.48	0.386654	0.0574952	6.72498	1.75616e-11	5.19024e-10	1375.18	1446	1320.09	1819.12	1786.05	1808.46
2021-03-01	1254.97	0.454304	0.0675981	6.72067	1.80896e-11	5.32838e-10	1019.64	1123.08	1032.01	1558.29	1399.27	1397.53
PRICKLE1	825.31	-0.476783	0.0709453	-6.72044	1.81183e-11	5.32838e-10	951.074	935.902	994.481	663.061	707.972	699.369
KCNK10	121.349	-1.13805	0.169455	-6.71597	1.86824e-11	5.48077e-10	161.263	180.613	157.837	85.0324	73.3535	69.9972
CYLD	781.134	0.528015	0.0793239	6.65644	2.80541e-11	8.20994e-10	565.057	660.057	690.949	910.515	950.261	909.964
IL6ST	377.363	0.66663	0.100335	6.64406	3.0515e-11	8.90829e-10	270.466	306.494	296.909	488.22	450.124	451.965
CTSS	1171.54	0.413145	0.0622241	6.63963	3.14468e-11	9.15794e-10	987.898	1010.34	1015.45	1383.45	1314.81	1317.27
IFRD1	939.796	0.441095	0.066481	6.6349	3.24725e-11	9.43362e-10	779.652	805.642	805.739	1071.98	1091.41	1084.35
SCAF11	3630.31	0.392272	0.0595714	6.58491	4.55161e-11	1.31908e-09	2797.35	3259.79	3356.51	4101.62	4220.05	4046.56
FOXO1	384.008	-0.681848	0.103795	-6.56917	5.05975e-11	1.46279e-09	502.837	440.038	474.614	269.428	332.313	284.816
SORT1	545.609	-0.55101	0.0839024	-6.56727	5.12447e-11	1.47793e-09	643.784	631.597	669.978	468.156	425.672	434.465
MEST	4959.33	-0.31393	0.0478065	-6.56669	5.14449e-11	1.48013e-09	5397.88	5530.03	5561.81	4690.16	4227.83	4348.27
PLEKHF2	1302.96	-0.42473	0.0647218	-6.56239	5.29513e-11	1.51981e-09	1378.99	1516.05	1583.88	1136.95	1089.19	1112.71
SPECC1	927.672	-0.436317	0.0665439	-6.55684	5.4961e-11	1.5737e-09	1095.83	1053.03	1052.98	778.667	790.217	795.313
PLEKHH3	124.107	-1.11803	0.170598	-6.55358	5.61734e-11	1.60457e-09	187.929	145.585	175.497	76.4336	85.5791	73.6177
TMEM41B	1166.63	0.516419	0.0789216	6.54344	6.01187e-11	1.71317e-09	820.285	1030.04	1024.28	1421.66	1410.39	1293.14
PTPN7	1276.05	-0.42735	0.0653684	-6.53756	6.25319e-11	1.77769e-09	1566.92	1366.09	1459.16	1125.48	1066.96	1071.68
GRAMD1C	76.1074	1.48141	0.227163	6.52134	6.96803e-11	1.97621e-09	39.3635	47.0688	34.2163	125.16	95.5818	115.254
VMP1	692.905	0.520268	0.0801388	6.49208	8.46604e-11	2.39537e-09	519.345	597.664	589.404	856.056	785.771	809.192
TBX21	24.9012	7.8782	1.21365	6.49133	8.50807e-11	2.40157e-09	0	0	0	52.5481	45.5681	51.291
BSN	354.42	-0.713818	0.110109	-6.4828	9.00338e-11	2.53538e-09	468.553	457.552	392.936	246.498	304.528	256.455
VAV3	1261.03	0.398377	0.0616135	6.46574	1.00806e-10	2.83207e-09	1071.7	1105.57	1086.09	1498.1	1391.49	1413.22
ISG15	25.9604	5.04299	0.780161	6.46404	1.01943e-10	2.85726e-09	0	3.28387	1.10375	41.0831	57.7936	52.4979
TXNIP	4916.52	0.294337	0.0455512	6.46167	1.03551e-10	2.89555e-09	4318.56	4473.72	4454.74	5663.73	5304.79	5283.58
HSPB7	1043.87	-0.444551	0.0691285	-6.43079	1.26945e-10	3.54141e-09	1245.67	1222.69	1147.9	860.833	843.565	942.548
ADCY7	1754.74	-0.343899	0.0534882	-6.42943	1.28084e-10	3.56486e-09	1998.65	1942.95	1948.12	1519.12	1561.54	1558.04
UHRF2	689.746	0.513142	0.080145	6.40268	1.52677e-10	4.23946e-09	523.154	586.718	593.819	766.247	842.454	826.088
PPP2R3C	291.121	0.727842	0.113874	6.39165	1.64107e-10	4.54625e-09	204.436	217.83	233.996	390.767	354.542	345.159
HIVEP3	2330.61	-0.386197	0.0605375	-6.37947	1.77703e-10	4.91152e-09	2675.45	2699.34	2546.36	1841.09	2172.82	2048.62
PPM1F	860.783	-0.465148	0.0729948	-6.37235	1.86156e-10	5.13327e-09	1072.97	930.429	992.273	735.673	721.309	712.04
GM2A	770.861	-0.454839	0.0714455	-6.36624	1.93721e-10	5.32957e-09	877.426	905.253	892.936	644.908	639.064	665.577
UBR1	785.783	0.492014	0.0774109	6.35588	2.07239e-10	5.68834e-09	582.834	690.707	684.327	909.56	911.361	935.911
DHRS9	43.9684	2.0246	0.318833	6.35004	2.15256e-10	5.89485e-09	21.5864	21.8924	8.83002	78.3444	65.5736	67.5835
PARP12	323.065	0.667812	0.105269	6.34386	2.24078e-10	6.1224e-09	247.609	255.047	245.033	394.588	412.335	383.778
EPAS1	159.349	-0.94517	0.14926	-6.33236	2.41444e-10	6.58182e-09	231.102	204.694	195.364	99.3637	106.696	118.875
ARHGAP45	3473.15	-0.31383	0.0498146	-6.29996	2.97724e-10	8.09754e-09	4082.38	3731.57	3735.1	3057.34	3158.65	3073.84
RASA3	1840.54	-0.375897	0.0597261	-6.29368	3.10019e-10	8.4128e-09	2162.45	2066.65	2003.31	1551.6	1720.47	1538.73
UGP2	1016.36	0.414756	0.0659655	6.28746	3.227e-10	8.73703e-09	830.443	896.496	884.106	1167.52	1180.32	1139.26
YME1L1	2988.63	0.339613	0.0540295	6.28569	3.26396e-10	8.81713e-09	2444.35	2680.73	2786.97	3427.09	3286.46	3306.16
FNDC3A	1634.41	0.375094	0.0596864	6.28442	3.29085e-10	8.8697e-09	1394.23	1472.27	1397.35	1858.29	1934.98	1749.33
ADRA2B	267.827	-0.712288	0.113354	-6.28374	3.30531e-10	8.8886e-09	351.732	321.819	325.607	203.504	196.721	207.578
FAM49B	2326.63	0.32695	0.0523846	6.24133	4.33865e-10	1.16151e-08	1950.4	2111.53	2128.03	2559.57	2610.72	2599.55
HIPK2	1472.77	-0.395139	0.0633094	-6.2414	4.33668e-10	1.16151e-08	1759.93	1565.31	1692.05	1239.18	1343.7	1236.42
PTPN6	2781.11	-0.3144	0.0505091	-6.22463	4.82703e-10	1.28937e-08	3234.16	2994.89	3023.18	2532.82	2417.33	2484.3
MDFIC	2677.23	0.297284	0.0479605	6.19852	5.69965e-10	1.51906e-08	2368.16	2450.86	2385.21	2939.83	3004.16	2915.14
MIA3	1122.98	0.391378	0.0633138	6.18155	6.34735e-10	1.68791e-08	965.041	989.539	959.161	1234.4	1315.92	1273.83
PPP1R16B	2066.06	0.340482	0.0551092	6.17832	6.47867e-10	1.71901e-08	1855.16	1782.05	1838.85	2300.65	2201.72	2417.92
MYL12A	4082.04	0.317214	0.05142	6.16908	6.86884e-10	1.81849e-08	3677.32	3484.18	3747.24	4749.39	4265.62	4568.52
CD200R1L	568.312	-0.586897	0.0951413	-6.16869	6.88596e-10	1.81872e-08	613.309	715.883	716.335	515.927	414.558	433.862
NUMA1	2020.91	-0.364974	0.0591687	-6.16836	6.90016e-10	1.81872e-08	2458.32	2248.35	2122.52	1743.64	1760.48	1792.17
TMEM189	1050.08	0.402409	0.065337	6.15897	7.32187e-10	1.92562e-08	937.106	901.969	877.483	1166.57	1186.99	1230.38
LOC112442610	419.015	0.656753	0.106689	6.15576	7.47185e-10	1.96074e-08	313.638	327.292	332.229	457.646	595.719	487.567
CECR2	1268.02	-0.399758	0.0649523	-6.15464	7.525e-10	1.97036e-08	1530.1	1397.83	1400.66	1032.81	1143.65	1103.06
RHOU	1236.1	0.475495	0.0773279	6.14908	7.79348e-10	2.0362e-08	940.915	1108.85	1049.67	1601.28	1358.15	1357.7
PBXIP1	465.731	-0.545501	0.0887381	-6.14731	7.88059e-10	2.05446e-08	566.327	550.595	540.839	362.104	396.776	377.743
PSME1	1363.8	0.37636	0.0612387	6.14579	7.95649e-10	2.06973e-08	1170.75	1147.16	1245.03	1556.38	1483.74	1579.76
LZTS1	85.966	-1.24507	0.20266	-6.14364	8.06537e-10	2.09349e-08	138.407	121.503	103.753	50.6373	47.7909	53.7047
LGR5	203.103	-0.83766	0.136501	-6.13668	8.42658e-10	2.1825e-08	289.512	251.763	242.826	129.937	142.261	162.321
TMEM204	399.953	-0.619188	0.101376	-6.10781	1.01009e-09	2.61049e-08	540.931	444.417	471.302	316.244	296.748	330.073
RCOR1	1636.48	-0.362549	0.0595593	-6.08719	1.14912e-09	2.9634e-08	1904.69	1737.17	1880.79	1375.8	1491.52	1428.91
USP9X	4780.83	0.281819	0.046391	6.07487	1.24086e-09	3.19309e-08	4117.93	4456.21	4366.44	5155.45	5410.37	5178.59
CHSY1	1514.72	0.375798	0.0618853	6.07249	1.25939e-09	3.23378e-08	1288.84	1391.27	1272.63	1801.92	1689.35	1644.33
HDAC4	811.744	0.480578	0.079181	6.06936	1.2842e-09	3.29041e-08	688.227	666.625	676.6	865.61	1044.73	928.67
CYTH3	1135.85	0.397528	0.0655223	6.06706	1.30274e-09	3.33078e-08	1010.75	910.726	1019.87	1306.06	1291.47	1276.24
PTPRCAP	1984.3	-0.371393	0.061324	-6.05624	1.3934e-09	3.55495e-08	2459.59	2152.03	2105.96	1728.35	1730.48	1729.41
NUDT7	934.647	0.418227	0.0690778	6.05443	1.40916e-09	3.58749e-08	806.317	766.236	825.607	1093	1090.3	1026.42
PLSCR2	534.126	0.533163	0.0881117	6.05099	1.43961e-09	3.65723e-08	403.794	447.701	454.746	623.889	672.407	602.217
RASD2	355.993	-0.648247	0.10717	-6.04877	1.45955e-09	3.70001e-08	479.981	437.849	385.21	290.448	281.188	261.283
LOC101903572	281.01	-0.689888	0.114224	-6.03977	1.54333e-09	3.90411e-08	355.542	317.44	369.757	218.791	200.055	224.474
ELAC2	480.949	0.544773	0.0903356	6.03055	1.63403e-09	4.12481e-08	394.905	418.146	360.927	555.099	577.936	578.684
NUP107	1024.39	0.413873	0.0687011	6.02426	1.69881e-09	4.27929e-08	852.03	946.848	836.644	1189.5	1139.2	1182.11
SCIMP	281.989	-0.666713	0.110963	-6.00843	1.87328e-09	4.70883e-08	341.574	342.617	352.097	211.148	234.509	209.992
PXN	984.331	-0.432533	0.0722167	-5.98937	2.10654e-09	5.28404e-08	1213.92	1150.45	1028.7	858.922	829.117	824.881
HVCN1	3340.7	-0.291977	0.0487564	-5.98849	2.11796e-09	5.30157e-08	3602.4	3560.81	3869.76	3038.24	2961.92	3011.09
KIAA1522	209.717	-0.786423	0.131345	-5.98745	2.13154e-09	5.32438e-08	299.671	252.858	245.033	159.555	146.707	154.477
AKAP7	97.0426	1.19506	0.199725	5.98351	2.18385e-09	5.44367e-08	46.9823	66.772	62.9139	151.912	116.699	136.977
SLC22A5	222.106	0.74841	0.125086	5.98316	2.18856e-09	5.44403e-08	175.231	159.815	162.252	280.893	282.3	272.144
CACTIN	644.106	-0.472378	0.0789593	-5.98255	2.19669e-09	5.4529e-08	788.54	750.911	706.402	528.347	554.597	535.841
DEPDC1	762.12	0.477028	0.0799366	5.96759	2.40788e-09	5.96474e-08	562.517	667.72	678.808	860.833	915.807	887.033
AGFG1	2543.72	0.325454	0.0545873	5.96208	2.49041e-09	6.15641e-08	2123.09	2350.15	2294.7	2915.94	2863.01	2715.41
LOC107131864	37.0422	1.97635	0.331898	5.95469	2.60564e-09	6.42796e-08	15.2375	15.3247	14.3488	60.1915	62.2393	54.9116
SIPA1	1392.47	-0.377003	0.0634685	-5.93999	2.85033e-09	7.01709e-08	1691.36	1522.62	1506.62	1173.26	1255.9	1205.04
SCOC	436.21	0.672187	0.113195	5.93832	2.87959e-09	7.07455e-08	260.307	351.374	395.143	561.787	521.254	527.393
ABCC1	1428.33	-0.355773	0.0600265	-5.92693	3.08647e-09	7.56724e-08	1657.08	1616.76	1535.32	1219.12	1305.91	1235.81
TNFRSF1B	187.802	0.837191	0.141378	5.92167	3.1869e-09	7.79745e-08	158.724	119.314	126.932	238.855	250.069	232.922
C21H15orf39	1236.31	0.373651	0.0631634	5.91562	3.30624e-09	8.0729e-08	1137.73	1033.32	1064.02	1366.25	1380.38	1436.15
TCF3	3020.19	-0.299758	0.0507052	-5.91178	3.38433e-09	8.24671e-08	3505.89	3324.37	3171.08	2755.43	2657.4	2706.96
BICDL1	282.015	-0.712962	0.120622	-5.91072	3.40606e-09	8.28276e-08	407.603	327.292	315.673	213.059	224.506	203.957
TMEM154	413.325	0.581988	0.0985267	5.90691	3.48585e-09	8.45957e-08	294.592	349.185	346.578	493.952	520.143	475.498
HMCES	434.947	-0.567181	0.0960254	-5.90657	3.49304e-09	8.45982e-08	561.248	514.473	482.34	376.435	337.871	337.314
TMOD3	1175.65	0.405941	0.0687324	5.90611	3.50272e-09	8.4661e-08	935.836	1096.81	997.792	1393	1333.7	1296.76
EYA1	20.3473	4.67588	0.791845	5.90504	3.52557e-09	8.50409e-08	1.26979	3.28387	0	43.9493	35.5653	38.0157
CPM	215.85	-0.74314	0.125883	-5.90344	3.56009e-09	8.57005e-08	260.307	260.52	289.183	168.154	160.044	156.89
PRPF19	2423.92	0.30261	0.0512914	5.89982	3.63898e-09	8.74235e-08	2203.09	2133.42	2178.81	2756.39	2561.81	2709.98
DOCK10	2539.73	0.314301	0.0534806	5.87691	4.18e-09	1.00219e-07	2135.79	2286.67	2364.24	2809.89	2905.24	2736.53
KLHL24	445.612	-0.546302	0.092983	-5.87529	4.22094e-09	1.00711e-07	490.139	568.109	526.49	365.926	371.213	351.796
NAB2	504.61	-0.508544	0.0865592	-5.8751	4.22581e-09	1.00711e-07	615.849	554.974	607.064	417.518	420.115	412.139
LOC112445782	24.8968	-2.7287	0.464401	-5.87575	4.20933e-09	1.00711e-07	30.475	45.9741	51.8764	11.465	7.77991	1.81027
ARHGEF40	315.662	-0.618389	0.105391	-5.8676	4.42159e-09	1.05167e-07	391.096	368.888	387.417	234.078	257.849	254.645
NXT2	534.569	0.512026	0.0875854	5.84602	5.03478e-09	1.19513e-07	401.254	465.215	452.539	632.488	651.29	604.631
ARRB1	2384.7	-0.298671	0.0511002	-5.8448	5.07176e-09	1.20152e-07	2623.39	2539.52	2730.68	2165.94	2095.02	2153.62
SMAD7	110.387	-1.04576	0.179051	-5.84054	5.2032e-09	1.23022e-07	163.803	144.49	140.177	67.8348	63.3507	82.6691
PRORSD1	241.61	0.804448	0.137911	5.83311	5.44045e-09	1.28225e-07	196.818	177.329	156.733	317.199	253.403	348.176
TRIM8	501.431	-0.509194	0.0872957	-5.83298	5.44474e-09	1.28225e-07	576.485	616.272	576.159	425.162	387.884	426.621
CDIP1	1009.37	-0.423015	0.0725696	-5.82909	5.5729e-09	1.30985e-07	1268.52	1080.39	1124.72	854.145	833.562	894.878
MSMO1	3698.95	0.333981	0.0573172	5.82689	5.64683e-09	1.32462e-07	2943.38	3425.07	3443.71	4146.52	4201.15	4033.89
HPCAL1	467.853	-0.531505	0.0912811	-5.82272	5.78968e-09	1.35547e-07	585.374	559.352	517.66	375.48	366.767	402.484
SAMSN1	399.663	0.616478	0.105883	5.82226	5.80581e-09	1.35658e-07	283.163	294.453	367.55	512.105	471.241	469.464
RBFA	358.378	0.581222	0.0999754	5.81365	6.11255e-09	1.4244e-07	300.941	282.413	278.146	428.984	436.787	423
ATP2B1	4507.1	-0.295912	0.0509013	-5.81345	6.11991e-09	1.4244e-07	4655.05	5091.09	5149.01	4145.57	4126.69	3875.19
DNAJA1	2696.34	0.300487	0.0516916	5.81307	6.13386e-09	1.42487e-07	2459.59	2377.52	2418.32	3033.46	2814.11	3075.05
KCNS1	84.9219	-1.20764	0.207874	-5.80947	6.26723e-09	1.45302e-07	110.472	128.071	115.894	64.9686	46.6795	43.4465
RAB14	2582.42	0.286721	0.0493813	5.80628	6.38755e-09	1.47805e-07	2239.91	2387.37	2349.89	2812.76	2876.35	2828.25
UTP15	503.673	0.506826	0.0873046	5.80525	6.42687e-09	1.48427e-07	394.905	418.146	433.775	614.335	584.605	576.27
COL18A1	6804.24	-0.257279	0.0443384	-5.80262	6.52882e-09	1.50491e-07	7706.36	7303.32	7226.27	6053.54	6116.12	6419.83
MC1R	44.8145	1.71337	0.296334	5.78188	7.38695e-09	1.69943e-07	16.5073	19.7032	26.4901	63.0577	68.9078	74.2212
RHOD	298.667	-0.622009	0.107847	-5.76753	8.044e-09	1.84703e-07	354.272	362.32	367.55	235.033	248.957	223.87
PSMD10	484.176	0.506838	0.0879395	5.76348	8.23973e-09	1.88834e-07	388.556	422.524	388.521	562.742	571.268	571.443
ABAT	362.491	0.581678	0.101143	5.75106	8.86838e-09	2.02851e-07	312.369	274.75	285.872	440.449	416.781	444.724
LARP7	684.072	0.45079	0.0784938	5.743	9.30127e-09	2.12346e-07	544.74	582.339	604.856	828.349	780.214	763.935
SULF2	1279.76	-0.360404	0.0631311	-5.70881	1.13768e-08	2.59235e-07	1535.18	1420.82	1362.03	1132.17	1111.42	1116.94
TRPV2	684.031	0.464586	0.0814371	5.70485	1.16448e-08	2.64835e-07	618.388	530.892	578.366	750.96	794.663	830.915
KIAA1671	890.56	-0.40553	0.0710981	-5.70381	1.1716e-08	2.65948e-07	1036.15	1061.78	949.227	752.871	754.652	788.675
MCL1	2583	0.298923	0.0524657	5.6975	1.2158e-08	2.75459e-07	2186.58	2397.22	2360.93	2929.32	2838.56	2785.41
ARF6	3471.58	0.254752	0.0448257	5.68317	1.32219e-08	2.98995e-07	3225.27	3119.67	3152.32	3820.72	3779.93	3731.57
CLCN3	558.261	0.473284	0.0833174	5.6805	1.34305e-08	3.03138e-07	472.362	480.539	448.123	649.686	671.295	627.561
UBE2D3	3467.27	0.274314	0.0483874	5.66912	1.43535e-08	3.23361e-07	2966.23	3212.72	3232.89	3814.04	3816.6	3761.14
SPRY4	831.645	-0.410179	0.0723708	-5.66773	1.447e-08	3.25371e-07	953.613	962.173	927.152	707.966	761.32	677.645
NRGN	5716.2	-0.277992	0.049119	-5.65957	1.51756e-08	3.40596e-07	6701.96	6139.74	5960.26	5151.62	5070.28	5273.32
TRNT1	498.528	0.491161	0.0868549	5.65496	1.55881e-08	3.49196e-07	402.524	430.187	410.596	600.959	564.599	582.304
TMEM33	1798.04	0.396431	0.0701587	5.65049	1.59994e-08	3.5774e-07	1415.82	1640.84	1593.82	1971.99	2251.73	1914.06
AKAP13	3662.12	-0.26938	0.0477175	-5.64531	1.64884e-08	3.67984e-07	4172.53	3929.69	3906.18	3245.56	3426.5	3292.28
JARID2	1599.25	0.327062	0.0580728	5.63193	1.78204e-08	3.9697e-07	1404.39	1387.98	1465.78	1705.42	1792.71	1839.24
ACSL5	1877.14	0.322385	0.0574049	5.61599	1.95439e-08	4.34551e-07	1630.41	1669.3	1706.4	2193.64	1964.98	2098.11
RNGTT	705.635	0.449847	0.0801131	5.61515	1.9639e-08	4.35855e-07	547.28	604.232	634.658	854.145	816.891	776.607
BCL6	108.353	1.01439	0.180798	5.61061	2.01617e-08	4.46625e-07	77.4573	66.772	71.7439	131.848	147.818	154.477
MASTL	399.877	0.540082	0.0964073	5.60209	2.11783e-08	4.67813e-07	325.067	330.576	321.192	450.003	502.36	470.067
ERRFI1	963.661	-0.392969	0.0701488	-5.60194	2.11966e-08	4.67813e-07	1037.42	1149.35	1098.23	805.419	813.557	877.982
CDK17	1938.94	0.318622	0.056974	5.59242	2.23926e-08	4.93298e-07	1615.17	1785.33	1772.63	2223.26	2136.14	2101.12
SDAD1	840.089	0.40885	0.0731473	5.5894	2.27856e-08	5.01032e-07	669.18	730.113	763.797	988.86	950.261	938.324
DANCR	255.395	0.681991	0.122049	5.58783	2.2992e-08	5.0464e-07	166.343	218.924	201.987	311.467	315.642	318.004
GADD45B	131.855	0.902905	0.1616	5.58729	2.30639e-08	5.05291e-07	95.2343	94.1375	86.0927	178.664	172.27	164.735
STAP1	720.982	0.436851	0.0782276	5.58436	2.34569e-08	5.12958e-07	557.438	644.733	632.45	841.725	845.788	803.761
OAS1Y	23.8991	5.93197	1.06438	5.57319	2.5012e-08	5.45965e-07	0	1.09462	1.10375	46.8156	53.348	41.0328
RAP2A	254.481	0.690273	0.123873	5.57245	2.51186e-08	5.46294e-07	170.152	222.208	189.845	327.709	320.088	296.885
KLHL14	76.4392	-1.21663	0.218322	-5.57266	2.50879e-08	5.46294e-07	111.742	93.0429	115.894	57.3252	37.7882	42.8431
KIF21B	2097.32	-0.326525	0.0586387	-5.56842	2.57064e-08	5.58063e-07	2465.93	2354.53	2186.53	1795.23	1833.84	1947.85
LASP1	3110.06	-0.257603	0.0462892	-5.56508	2.62036e-08	5.67824e-07	3417.01	3352.83	3392.94	2899.7	2762.98	2834.89
ZNF511	1010.6	-0.366048	0.0658129	-5.56196	2.66767e-08	5.77029e-07	1154.24	1091.34	1171.08	869.432	873.573	903.929
IRF4	498.693	0.490178	0.0881854	5.55849	2.72112e-08	5.87525e-07	392.365	411.578	440.397	561.787	586.828	599.2
ITIH5	249.444	-0.677059	0.122069	-5.54651	2.9143e-08	6.28101e-07	278.084	343.711	299.117	199.683	181.161	194.906
CFLAR	504.073	0.49941	0.0901384	5.54048	3.01649e-08	6.48952e-07	397.445	408.294	445.916	632.488	571.268	569.029
IPCEF1	618.562	0.448681	0.0811215	5.53098	3.18455e-08	6.83876e-07	505.377	553.879	508.83	685.991	744.649	712.644
FASN	12797.5	-0.296556	0.053652	-5.5274	3.25017e-08	6.96715e-07	15232.4	13764.9	13330	10781.9	11985.5	11690.1
CGGBP1	2119.37	0.332189	0.060148	5.52286	3.33519e-08	7.13658e-07	1695.17	1991.12	1939.29	2338.87	2391.77	2359.99
LOC100298453	58.6684	1.37344	0.249062	5.51444	3.49883e-08	7.47335e-07	31.7448	36.1225	29.8013	89.8095	86.6905	77.8417
SLC16A5	25.8747	2.34685	0.426271	5.50553	3.68051e-08	7.84738e-07	7.61875	7.66236	9.93377	41.0831	53.348	35.602
ELF2	710.939	0.419086	0.0762851	5.49368	3.93654e-08	8.3783e-07	565.057	635.976	622.516	807.33	821.337	813.416
BCL9L	713.238	0.449627	0.0819025	5.48978	4.02433e-08	8.54991e-07	646.324	605.326	559.602	757.648	852.456	858.069
MYO1E	634.372	0.450871	0.0821467	5.48861	4.05109e-08	8.59148e-07	529.503	576.866	500	715.609	767.989	716.264
LOC781663	17.293	4.09147	0.74659	5.4802	4.24836e-08	8.99387e-07	2.53958	3.28387	0	21.0192	38.8996	38.0157
MX2	12.2064	6.83889	1.24948	5.47341	4.41469e-08	9.32945e-07	0	0	0	24.8409	26.674	21.7233
RIC1	517.238	0.493705	0.090248	5.47054	4.48668e-08	9.46484e-07	430.459	390.78	467.991	576.118	620.17	617.906
GFRA1	6717.12	0.259043	0.047361	5.46954	4.5121e-08	9.50168e-07	6196.58	5930.66	6222.96	7704.51	6929.68	7318.33
LOC515551	1541.55	0.359214	0.0656836	5.46886	4.52937e-08	9.52124e-07	1320.58	1349.67	1378.59	1593.64	1888.3	1718.55
RABGGTB	539.71	0.46638	0.0853293	5.46565	4.61209e-08	9.67808e-07	429.189	476.161	452.539	652.552	620.17	607.648
RASAL2	539.475	0.468695	0.0858079	5.46214	4.70417e-08	9.854e-07	449.506	437.849	467.991	628.666	659.07	593.769
TRMT13	397.21	0.528025	0.0966768	5.46175	4.71451e-08	9.85837e-07	313.638	325.103	335.541	454.78	496.803	457.395
RNF122	21.5614	2.59452	0.475197	5.45989	4.76434e-08	9.94514e-07	5.07916	6.56773	6.62251	38.2168	36.6767	36.2054
BMP1	366.506	-0.541166	0.0991885	-5.45594	4.87153e-08	1.01512e-06	459.664	427.997	416.115	312.422	288.968	293.868
ZYG11B	867.75	0.385036	0.0705941	5.45422	4.91875e-08	1.02317e-06	704.734	784.844	766.004	984.082	994.718	972.116
PIEZO1	6253.33	-0.298353	0.0548254	-5.44188	5.27224e-08	1.09479e-06	7510.81	6642.17	6545.25	5336.98	5701.57	5783.22
ZDHHC8	321.074	-0.61261	0.112708	-5.43538	5.46806e-08	1.13348e-06	444.427	379.834	342.163	249.365	251.18	259.472
CBL	2958.88	-0.263982	0.0485761	-5.4344	5.49815e-08	1.13774e-06	3160.51	3264.16	3259.38	2592.05	2784.1	2693.08
INPPL1	3641.25	-0.284642	0.0524624	-5.42565	5.77435e-08	1.19164e-06	4286.81	3938.45	3778.14	3306.71	3198.66	3338.75
SGK1	47.5056	1.53618	0.28314	5.42552	5.77856e-08	1.19164e-06	16.5073	28.4602	27.5938	73.5673	68.9078	69.9972
VEGFA	929.98	0.365256	0.0673312	5.42478	5.80276e-08	1.19457e-06	835.523	788.128	815.673	1025.17	1063.63	1051.77
LOC786372	42.2218	1.63519	0.3022	5.41097	6.26842e-08	1.28821e-06	15.2375	25.1763	20.9713	58.2806	66.685	66.9801
CCDC71L	301.488	0.597396	0.110494	5.40661	6.42302e-08	1.31771e-06	214.595	252.858	251.656	352.55	366.767	370.502
GTF2B	327.856	0.575631	0.106807	5.38946	7.06704e-08	1.44735e-06	278.084	238.628	274.834	383.123	384.55	407.915
SUPT4H1	1408.8	0.324705	0.0602552	5.38883	7.09174e-08	1.44992e-06	1285.03	1194.23	1277.04	1582.18	1510.41	1603.9
LIPE	318.354	-0.583176	0.108312	-5.38425	7.27482e-08	1.48481e-06	421.571	368.888	355.408	244.587	265.629	254.042
IBTK	2341.39	0.336245	0.062528	5.3775	7.5526e-08	1.53887e-06	1858.97	2189.24	2154.52	2686.64	2667.4	2491.54
LOC104973680	63.2777	-1.22377	0.227629	-5.37616	7.60917e-08	1.54463e-06	90.1552	90.8537	84.9889	37.2614	37.7882	38.6191
ADAM9	747.756	-0.391941	0.0729027	-5.37622	7.60659e-08	1.54463e-06	822.825	842.859	878.587	642.042	662.404	637.819
TNFRSF13C	372.127	-0.551685	0.102622	-5.37591	7.61964e-08	1.54463e-06	492.679	420.335	416.115	286.626	305.639	311.367
PEMT	182.79	0.74184	0.138044	5.37393	7.70403e-08	1.55909e-06	149.835	128.071	133.554	222.613	226.729	235.939
NAA15	1802.08	0.371699	0.0693435	5.36025	8.31048e-08	1.67897e-06	1370.1	1647.41	1690.95	2101.92	2042.78	1959.32
WDR75	1255.42	0.354774	0.0662122	5.35814	8.40811e-08	1.69583e-06	1017.1	1136.22	1149.01	1479.95	1379.27	1370.98
RND3	36.1685	-1.69545	0.316477	-5.35728	8.44839e-08	1.69931e-06	48.2521	56.9204	60.7064	12.4205	20.0055	18.7061
PRKAB2	740.278	0.413652	0.0772148	5.35716	8.45386e-08	1.69931e-06	598.072	655.679	649.006	796.82	892.467	849.621
MN1	93.2377	-1.09119	0.203729	-5.3561	8.50352e-08	1.70642e-06	129.519	102.895	149.007	47.771	64.4621	65.7732
MAMSTR	348.586	-0.536202	0.10013	-5.35509	8.55157e-08	1.71318e-06	417.761	397.348	422.737	295.225	277.854	280.592
FCGR2B	641.118	0.446372	0.0833781	5.35359	8.62242e-08	1.72448e-06	606.96	510.094	513.245	726.119	746.872	743.418
CD79A	4049.15	-0.24034	0.0448998	-5.3528	8.66059e-08	1.72922e-06	4503.95	4344.56	4314.57	3692.7	3632.11	3807
TGFBR2	493.471	-0.469579	0.0877437	-5.3517	8.71298e-08	1.73678e-06	556.169	614.083	548.565	411.786	415.67	414.552
LOC100848263	178.534	0.850505	0.159094	5.34592	8.99578e-08	1.79016e-06	115.551	149.963	114.79	200.638	277.854	212.405
PALMD	526.981	-0.463534	0.0867844	-5.34122	9.23241e-08	1.83419e-06	591.723	616.272	628.035	446.181	409.001	470.671
LOC100337323	110.665	0.968645	0.181368	5.34076	9.25559e-08	1.83574e-06	77.4573	73.3397	75.0552	140.447	131.147	166.545
ELMOD2	423.771	0.522447	0.097939	5.33441	9.58565e-08	1.89805e-06	321.257	369.982	349.89	536.946	495.692	468.861
HMGN4	682.582	0.44604	0.0836902	5.32965	9.8401e-08	1.94521e-06	552.359	600.948	576.159	844.591	805.777	715.661
SNX29	1707.08	0.320712	0.0602174	5.32591	1.00449e-07	1.98242e-06	1574.54	1495.25	1488.96	1776.13	1913.86	1993.71
LARP4	1519.63	0.329746	0.0619625	5.32171	1.02799e-07	2.02544e-06	1258.36	1417.54	1358.72	1705.42	1752.7	1625.02
CAPZA2	1346.53	0.326494	0.0613704	5.32006	1.0373e-07	2.04043e-06	1133.92	1242.4	1204.19	1532.49	1513.75	1452.44
TMEM41A	275.905	0.59898	0.112606	5.31927	1.04186e-07	2.04601e-06	219.674	227.681	210.817	343.951	325.645	327.659
CYB5R3	2352.68	-0.289262	0.0544578	-5.31167	1.08627e-07	2.12972e-06	2768.14	2488.08	2511.04	2113.39	2093.91	2141.55
MAP4K4	5621.89	-0.212587	0.0400304	-5.31063	1.09244e-07	2.13832e-06	6054.36	6026.99	6022.07	5237.61	5250.33	5139.97
DNMT3B	174.115	-0.753394	0.141996	-5.30574	1.12217e-07	2.19292e-06	208.246	233.155	211.92	133.759	141.15	116.461
CMTM3	1792.09	-0.287361	0.054168	-5.305	1.12675e-07	2.19826e-06	2026.59	1979.08	1907.28	1610.84	1590.44	1638.3
PLCG2	4296.23	-0.231598	0.0436654	-5.30392	1.13342e-07	2.20767e-06	4682.99	4669.66	4566.22	3870.41	4062.23	3925.88
GLS	1386.76	0.305694	0.0577173	5.29641	1.18104e-07	2.29669e-06	1226.62	1234.73	1258.28	1526.76	1555.98	1518.22
ATP13A2	2006.66	-0.353844	0.0668299	-5.2947	1.19212e-07	2.31446e-06	2505.3	2161.88	2092.71	1671.98	1768.26	1839.84
DYRK2	7369.76	-0.207983	0.0393345	-5.28756	1.23956e-07	2.40265e-06	7833.34	7990.74	7873.07	6729.02	6986.36	6806.02
SH3TC1	738.804	-0.411617	0.0778506	-5.28726	1.2416e-07	2.40272e-06	918.059	805.642	810.154	613.38	629.062	656.525
ZFP36	293.429	0.600718	0.11365	5.28568	1.25239e-07	2.41967e-06	228.562	261.615	209.713	346.817	351.208	362.658
RGS3	276.646	-0.619719	0.117415	-5.27802	1.3059e-07	2.51896e-06	375.858	318.535	313.466	227.39	198.944	225.681
GNG7	1153.69	-0.326879	0.061956	-5.27598	1.32046e-07	2.54295e-06	1321.85	1264.29	1268.21	1011.79	1010.28	1045.73
ZNF639	422.567	0.529003	0.100367	5.27066	1.35937e-07	2.61367e-06	332.685	354.658	350.993	440.449	526.811	529.806
ELMSAN1	1287.3	0.349198	0.0662737	5.26903	1.37145e-07	2.63265e-06	1089.48	1131.84	1172.19	1352.87	1551.54	1425.89
GIT1	803.514	-0.38061	0.0722709	-5.26644	1.39098e-07	2.66585e-06	963.771	886.644	877.483	711.788	686.855	694.541
UBE2O	754.12	-0.406049	0.0772336	-5.25741	1.46094e-07	2.79546e-06	925.678	823.156	834.437	631.533	626.839	683.076
OSBPL8	3680.81	0.264309	0.0503308	5.25144	1.50918e-07	2.88313e-06	3137.65	3428.36	3461.37	4004.16	4132.25	3921.05
H1FX	2498.73	-0.337379	0.0642495	-5.25107	1.51214e-07	2.88418e-06	2957.34	2734.37	2669.98	2292.05	2347.31	1991.3
DCLRE1A	605.442	0.427438	0.0815126	5.24383	1.57279e-07	2.99508e-06	496.488	554.974	496.689	707.011	690.19	687.3
AIDA	585.048	0.419846	0.0800921	5.24204	1.58811e-07	3.01943e-06	502.837	500.242	498.896	682.17	655.736	670.404
GRK5	677.837	-0.411012	0.0784776	-5.23732	1.62926e-07	3.09274e-06	793.619	769.52	761.589	606.692	534.591	601.01
LOC112446725	16.2897	4.77693	0.91294	5.23247	1.6726e-07	3.16997e-06	0	3.28387	0	25.7963	36.6767	31.9815
NAP1L1	8449.68	0.301423	0.0576426	5.22917	1.70271e-07	3.22192e-06	6790.84	7870.33	8045.25	9794.01	9021.37	9176.27
ZNF789	258.714	0.606706	0.116069	5.22712	1.7217e-07	3.25271e-06	204.436	211.262	198.675	313.378	323.422	301.109
SPTSSA	771.958	0.385745	0.0738117	5.22607	1.7315e-07	3.26605e-06	667.91	654.584	684.327	836.948	920.253	867.724
RFK	524.816	0.482061	0.0923012	5.2227	1.76332e-07	3.32083e-06	392.365	427.997	491.17	639.176	606.833	591.356
TTYH3	2908.54	-0.290831	0.0557416	-5.21748	1.8137e-07	3.41033e-06	3466.53	3095.59	3044.15	2539.51	2640.73	2664.72
SMC5	1728.96	0.29974	0.0576746	5.19708	2.0244e-07	3.80053e-06	1447.56	1588.3	1612.58	1924.22	1881.63	1919.49
PANX1	1200.42	0.347413	0.0669183	5.19159	2.08502e-07	3.90818e-06	962.502	1074.92	1129.14	1361.47	1348.15	1326.33
TIAM2	167.203	0.738929	0.142578	5.18263	2.1878e-07	4.09441e-06	120.63	121.503	133.554	206.371	211.169	209.992
NR2F6	605.054	-0.434433	0.0838829	-5.17904	2.23025e-07	4.16732e-06	756.796	663.341	667.77	540.768	492.357	509.29
HEATR5B	704.831	0.389305	0.075352	5.16648	2.38538e-07	4.45022e-06	617.118	629.408	583.885	785.355	819.114	794.106
FMR1	470.06	0.473343	0.0917345	5.15992	2.47052e-07	4.60187e-06	383.477	402.821	392.936	512.105	590.162	538.858
CEP162	442.252	0.497255	0.0964883	5.15353	2.55633e-07	4.75429e-06	325.067	407.2	366.446	507.328	527.923	519.548
CACNG5	63.5	-1.17977	0.229049	-5.15073	2.59475e-07	4.81824e-06	92.6948	83.1913	89.4039	40.1276	33.3425	42.2397
SINHCAF	572.38	0.465922	0.0904833	5.14926	2.61511e-07	4.8485e-06	424.11	498.053	517.66	714.654	640.176	639.63
DCLK2	1385.54	-0.299076	0.0581098	-5.14674	2.65057e-07	4.90663e-06	1527.56	1517.15	1540.84	1203.83	1274.79	1249.09
TM7SF3	709.704	0.384348	0.0747771	5.13992	2.74853e-07	5.0801e-06	634.896	610.799	601.545	826.438	794.663	789.882
SPTLC2	701.644	0.381481	0.0742506	5.13774	2.78056e-07	5.13136e-06	600.611	612.989	613.686	788.221	806.888	787.468
NAA50	2393.17	0.290965	0.0566374	5.13734	2.7866e-07	5.13457e-06	2013.89	2211.14	2226.27	2721.04	2681.85	2504.81
BDH1	118.108	-0.892006	0.173958	-5.12771	2.9328e-07	5.39564e-06	180.31	139.017	142.384	75.4782	83.3562	88.0999
NUP160	2189.82	0.261648	0.0511009	5.12022	3.05181e-07	5.60595e-06	1956.75	2041.47	1979.03	2378.04	2343.98	2439.64
TNRC6C	1496.62	-0.29962	0.0586112	-5.112	3.18773e-07	5.84663e-06	1668.51	1652.88	1629.14	1309.88	1415.94	1303.4
PDLIM2	551.467	-0.422521	0.0826934	-5.10948	3.2304e-07	5.91579e-06	655.212	617.367	624.724	457.646	465.683	488.17
ANAPC1	2654.43	-0.240415	0.0470962	-5.10475	3.31224e-07	6.05639e-06	2868.46	2870.1	2885.21	2413.39	2468.46	2420.94
HIST1H1E	53.2198	-1.42455	0.279373	-5.09909	3.41295e-07	6.23098e-06	83.8062	66.772	82.7814	42.0385	15.5598	28.3609
EXTL2	259.944	0.624084	0.122412	5.09821	3.42885e-07	6.25046e-06	185.39	232.06	196.468	331.531	288.968	325.246
ATXN7	716.546	0.385357	0.0756523	5.09379	3.50977e-07	6.38821e-06	642.514	594.38	626.931	788.221	844.676	802.554
EIF3J	1426.29	0.300785	0.0590711	5.09191	3.54477e-07	6.44209e-06	1230.43	1320.11	1280.35	1603.19	1591.55	1532.09
DCUN1D5	543.919	0.446563	0.0879255	5.07888	3.79661e-07	6.8893e-06	415.222	484.918	480.132	655.418	599.053	628.768
PPP4R2	1991.71	0.294726	0.0580404	5.07794	3.81543e-07	6.90247e-06	1649.46	1811.6	1902.87	2190.78	2203.94	2191.64
PLIN2	655.609	0.39157	0.0771089	5.07814	3.81152e-07	6.90247e-06	576.485	551.69	575.055	750.005	721.309	759.108
RMI2	521.731	0.463786	0.0913517	5.07693	3.83583e-07	6.92887e-06	481.251	420.335	418.322	596.182	566.822	647.474
LOC100336669	9.39516	6.48482	1.27912	5.06973	3.9838e-07	7.18528e-06	0	0	0	22.9301	11.1142	22.3267
LNPK	1822.31	0.306682	0.0604983	5.06927	3.99348e-07	7.19188e-06	1486.93	1729.5	1667.77	2047.46	2013.89	1988.28
CASKIN2	87.5801	-0.99057	0.195548	-5.0656	4.07121e-07	7.32082e-06	125.709	111.651	112.583	50.6373	63.3507	61.5493
ITGB5	223.399	-0.636666	0.125714	-5.06442	4.09655e-07	7.35532e-06	289.512	270.372	258.278	164.332	167.824	190.079
ARHGAP21	1398.95	-0.301418	0.0595975	-5.05756	4.24659e-07	7.61325e-06	1551.68	1566.4	1514.35	1198.1	1309.25	1253.92
DNAJA2	2687.25	0.261393	0.0517355	5.05248	4.36101e-07	7.80667e-06	2359.27	2462.9	2511.04	3053.52	2810.77	2926
DDN	839.728	-0.357478	0.0708315	-5.04688	4.49076e-07	8.0269e-06	928.217	916.199	983.443	762.425	732.423	715.661
LOC112446779	137.401	-0.871651	0.172823	-5.0436	4.56855e-07	8.15373e-06	151.105	217.83	163.355	83.1215	110.03	98.9616
RGMB	401.974	-0.468493	0.0931462	-5.02965	4.9137e-07	8.75666e-06	467.283	461.931	470.199	332.486	345.65	334.297
APBB1IP	1986.74	-0.257556	0.0512308	-5.02737	4.97251e-07	8.84825e-06	2170.07	2148.74	2169.98	1806.7	1839.39	1785.53
PMEPA1	1055.02	0.336709	0.0670893	5.01882	5.19892e-07	9.23737e-06	976.469	887.739	931.567	1180.9	1221.45	1132.02
WDR43	1686.52	0.309542	0.0616806	5.01847	5.20839e-07	9.24045e-06	1412.01	1517.15	1587.2	1975.81	1801.61	1825.36
TMED2	3672.67	0.287701	0.0573502	5.01657	5.26019e-07	9.31849e-06	3005.6	3494.03	3417.22	4197.16	4037.78	3884.24
MYEF2	1653.12	0.327322	0.0652679	5.01505	5.30195e-07	9.37856e-06	1319.31	1558.74	1515.45	1823.9	1919.42	1781.91
ATAD2B	498.378	0.479232	0.0955873	5.01355	5.3435e-07	9.43808e-06	377.128	425.808	445.916	522.615	605.722	613.079
FHL3	295.497	-0.580507	0.11584	-5.01128	5.40678e-07	9.53573e-06	397.445	350.279	317.881	232.167	221.172	254.042
FLNA	7984.14	-0.206538	0.0412472	-5.00732	5.51926e-07	9.71977e-06	8790.76	8418.74	8461.37	7249.73	7357.58	7626.68
CORO1A	8050.47	-0.23259	0.0464776	-5.00433	5.6056e-07	9.85727e-06	9137.42	8614.68	8348.78	7587.94	7087.5	7526.51
HIST1H2AC	62.1806	-1.41494	0.282927	-5.00109	5.70085e-07	1.001e-05	99.0437	94.1375	77.2627	56.3698	23.3397	22.9301
SRSF1	6744.62	0.218266	0.0436508	5.00028	5.72463e-07	1.00324e-05	5923.58	6384.93	6394.04	7340.49	7211.98	7212.73
EIF5	6616.25	0.259969	0.051993	5.00009	5.7304e-07	1.00324e-05	5547.72	6179.14	6331.12	7424.57	7279.78	6935.15
PCGF5	650.767	0.425098	0.0850391	4.99886	5.76709e-07	1.00819e-05	519.345	585.623	557.395	721.342	819.114	701.782
CCND3	544.562	-0.435406	0.0872506	-4.99029	6.02903e-07	1.05244e-05	653.942	572.488	650.11	460.512	486.8	443.517
SRSF6	3426.12	0.22311	0.0447142	4.9897	6.04716e-07	1.05406e-05	3112.26	3153.61	3217.44	3673.59	3724.36	3675.46
USF1	628.567	0.387645	0.0778463	4.97962	6.371e-07	1.10889e-05	546.01	547.311	539.735	702.234	731.312	704.799
RASGRP2	932.722	-0.384587	0.0774358	-4.96653	6.81627e-07	1.18466e-05	1117.42	1025.66	1032.01	736.629	795.774	888.844
SDHAF2	557.553	0.413042	0.0831922	4.96492	6.87301e-07	1.19279e-05	485.06	467.404	481.236	664.017	635.73	611.872
XPA	256.115	0.58872	0.118594	4.96415	6.90019e-07	1.19577e-05	215.864	212.357	185.43	321.021	304.528	297.488
LYST	910.683	0.394981	0.079613	4.96127	7.00347e-07	1.2119e-05	690.766	825.345	839.956	989.815	1108.08	1010.13
FCGR1A	92.9416	0.973874	0.196617	4.95316	7.30183e-07	1.2617e-05	68.5687	58.015	61.8101	140.447	111.142	117.668
ICK	1718.25	-0.276343	0.0558937	-4.94407	7.65064e-07	1.32007e-05	1789.14	1907.93	1948.12	1547.78	1561.54	1555.02
PDPR	1405.37	-0.307113	0.0622534	-4.93328	8.0862e-07	1.39321e-05	1560.57	1613.47	1491.17	1181.85	1284.8	1300.38
C1H3orf38	650.371	0.421172	0.0854314	4.92994	8.22531e-07	1.41513e-05	505.377	539.649	620.309	728.03	783.549	725.316
MLLT6	1620.66	0.310464	0.0629936	4.92851	8.28599e-07	1.42352e-05	1528.83	1421.91	1394.04	1668.16	1834.95	1876.05
CNP	1528.58	0.287407	0.0583217	4.92796	8.30916e-07	1.42545e-05	1399.31	1343.1	1389.62	1749.37	1613.78	1676.31
RRN3	1016.51	0.35146	0.0713498	4.92587	8.39843e-07	1.4387e-05	836.792	939.186	898.454	1143.64	1208.11	1072.89
CLIP2	1627.97	-0.298593	0.0606424	-4.92383	8.48667e-07	1.45173e-05	1912.31	1808.32	1668.87	1481.86	1440.4	1456.06
INAFM2	878.553	-0.347611	0.0706473	-4.92037	8.63828e-07	1.47555e-05	986.628	931.524	1035.32	782.489	749.095	786.262
MLEC	6007.87	-0.20661	0.0419977	-4.91956	8.67403e-07	1.47954e-05	6581.33	6266.71	6467.99	5665.64	5447.05	5618.48
PRKCD	424.105	-0.45849	0.0932567	-4.91643	8.81384e-07	1.50125e-05	469.823	479.445	522.075	367.837	357.876	347.572
YRDC	279.213	0.566909	0.115354	4.91453	8.89964e-07	1.5137e-05	229.832	241.912	203.09	316.244	352.319	331.883
VMA21	1742.69	0.328167	0.0670206	4.89652	9.75494e-07	1.65681e-05	1377.72	1664.92	1587.2	1964.34	2009.44	1852.51
CSRNP1	162.099	-0.704702	0.144051	-4.89202	9.98071e-07	1.69275e-05	198.087	213.451	189.845	124.205	131.147	115.857
USP15	1557.49	0.329292	0.067332	4.89057	1.00544e-06	1.70283e-05	1225.35	1452.56	1459.16	1794.28	1728.25	1685.36
NMD3	837.598	0.345062	0.0705899	4.88826	1.01729e-06	1.72046e-05	709.813	730.113	772.627	953.509	930.255	929.273
TMEM230	661.037	0.398293	0.0815038	4.88681	1.02483e-06	1.73077e-05	570.136	607.515	530.905	773.89	773.546	710.23
KIAA1551	771.748	0.397639	0.0815174	4.87796	1.07188e-06	1.80766e-05	606.96	667.72	724.062	921.025	808	902.722
IL4R	431.357	-0.447846	0.0919374	-4.87121	1.10917e-06	1.86791e-05	502.837	487.107	504.415	384.079	343.428	366.278
LIX1L	581.435	0.390334	0.0801601	4.86943	1.11922e-06	1.88219e-05	507.916	495.864	506.622	650.641	660.181	667.387
PCDHGA2	664.358	0.373704	0.0767588	4.86855	1.12421e-06	1.88791e-05	603.151	562.636	570.64	760.514	752.429	736.781
NUDT9	557.49	0.408814	0.084038	4.86463	1.14673e-06	1.92302e-05	450.776	499.148	484.547	650.641	647.956	611.872
ND5	48128.9	0.257721	0.0531131	4.8523	1.22039e-06	2.04369e-05	39508.3	46452.5	45556.3	53027.7	53312.4	50916.3
TPPP	433.2	-0.451747	0.0931476	-4.84979	1.23589e-06	2.06675e-05	506.647	495.864	502.207	348.728	352.319	393.433
ARHGAP18	363.099	0.497185	0.102704	4.84095	1.29223e-06	2.15793e-05	280.624	288.98	332.229	438.538	427.895	410.328
TXNL4B	403.433	0.461035	0.0952914	4.83816	1.31049e-06	2.18537e-05	342.844	356.847	318.984	474.844	461.238	465.843
FLI1	1520.95	-0.292572	0.0605003	-4.83587	1.32564e-06	2.20755e-05	1580.89	1741.54	1703.09	1394.91	1305.91	1399.34
YARS2	517.904	0.449495	0.093032	4.83161	1.35432e-06	2.25217e-05	419.031	448.795	441.501	591.405	662.404	544.289
PLPP1	1577.3	-0.297878	0.0617247	-4.82592	1.39361e-06	2.31106e-05	1606.29	1800.65	1807.95	1464.66	1404.83	1379.43
SEC24B	838.857	0.3417	0.0708018	4.82615	1.39201e-06	2.31106e-05	711.083	744.343	761.589	936.311	968.044	911.774
BTAF1	1614.69	0.297691	0.0617209	4.82318	1.41287e-06	2.33977e-05	1332.01	1511.67	1497.79	1745.55	1849.4	1751.74
TNFSF10	13.2234	4.45538	0.925001	4.81662	1.46008e-06	2.41459e-05	1.26979	0	2.2075	21.0192	28.8968	25.9472
BTBD1	653.341	0.393866	0.0818075	4.81454	1.47537e-06	2.4365e-05	547.28	554.974	592.715	791.088	685.744	748.246
ZBTB46	350.828	-0.493083	0.102584	-4.80664	1.53485e-06	2.52426e-05	379.668	418.146	433.775	278.983	287.857	306.539
RNF138	303.884	0.53318	0.110924	4.8067	1.5344e-06	2.52426e-05	217.134	262.709	263.797	354.461	366.767	358.434
SYNPO2L	108.77	-0.856047	0.178079	-4.80711	1.53127e-06	2.52426e-05	130.788	132.449	156.733	87.8986	71.1306	73.6177
ADAP1	652.796	-0.398482	0.0829788	-4.80222	1.56918e-06	2.57716e-05	822.825	710.41	696.468	575.163	543.483	568.425
DERL1	1471.82	0.273909	0.0570657	4.79988	1.58759e-06	2.60382e-05	1334.55	1294.94	1368.65	1606.06	1607.11	1619.59
OTUD4	922.155	0.33038	0.0689357	4.79258	1.64654e-06	2.6931e-05	778.382	820.967	848.786	1014.66	1063.63	1006.51
ELAVL1	2116.26	0.250612	0.0522887	4.79285	1.64431e-06	2.6931e-05	1954.21	1972.51	1871.96	2364.66	2261.73	2272.5
CAPRIN1	7429.62	0.232715	0.048569	4.79142	1.65602e-06	2.70491e-05	6331.18	7073.45	7086.09	8209.92	7929.96	7947.1
BCAR3	70.8541	-1.0244	0.213925	-4.78857	1.67971e-06	2.73985e-05	90.1552	98.516	96.0265	43.9493	50.0137	46.4637
FYN	1213.4	-0.287035	0.0599758	-4.78585	1.70269e-06	2.77354e-05	1348.52	1322.3	1331.13	1106.38	1078.07	1094.01
PHF6	653.488	0.453743	0.0948546	4.78356	1.72218e-06	2.80148e-05	459.664	571.393	619.205	789.177	779.103	702.386
VAV2	589.156	-0.402329	0.0841794	-4.77942	1.758e-06	2.85586e-05	633.626	679.76	694.26	516.882	537.926	472.481
PELI1	660.802	0.373311	0.0781439	4.77722	1.77733e-06	2.88334e-05	589.183	557.163	583.885	737.584	717.975	779.021
ID2	727.165	0.36303	0.0760163	4.77568	1.79098e-06	2.90153e-05	620.928	638.165	646.799	861.789	816.891	778.417
SERP1	2428.48	0.251207	0.0526103	4.77486	1.79834e-06	2.9095e-05	2107.85	2243.98	2296.91	2719.12	2625.17	2577.83
CALCOCO2	491.23	0.451603	0.0946096	4.77333	1.81202e-06	2.92372e-05	383.477	407.2	455.85	573.252	522.366	605.234
SRP54	959.32	0.327621	0.0686355	4.77335	1.81189e-06	2.92372e-05	805.048	882.266	862.031	1101.6	1072.52	1032.46
PDE7A	309.815	0.510371	0.107079	4.76632	1.87624e-06	3.02325e-05	241.26	270.372	253.863	370.703	367.879	354.813
DDX18	1479.99	0.285485	0.0599246	4.76407	1.89727e-06	3.05119e-05	1279.95	1336.53	1383	1698.74	1597.11	1584.59
CCAR1	2965.49	0.224996	0.0472292	4.76392	1.89869e-06	3.05119e-05	2648.78	2808.8	2745.03	3179.64	3205.32	3205.39
MAP4K5	418.92	0.448587	0.0941773	4.76322	1.90528e-06	3.05767e-05	344.113	362.32	354.305	481.532	509.029	462.223
CBFA2T3	937.701	-0.326016	0.0685445	-4.75626	1.9721e-06	3.16066e-05	1103.45	1019.09	1008.83	808.285	843.565	842.983
CCNJL	59.4612	-1.14554	0.241766	-4.73822	2.15599e-06	3.45074e-05	99.0437	75.5289	71.7439	33.4397	37.7882	39.2226
AGO4	878.414	-0.3201	0.0676321	-4.73296	2.21267e-06	3.53672e-05	976.469	988.444	960.265	780.578	793.551	771.176
CD24	187.293	-0.675425	0.142914	-4.72608	2.28894e-06	3.65373e-05	262.847	227.681	199.779	134.714	161.155	137.581
SRSF3	4191.1	0.218278	0.0462023	4.72439	2.30806e-06	3.67925e-05	3726.84	3923.13	3971.3	4648.12	4424.55	4452.67
MAK16	478.93	0.433432	0.0917486	4.72412	2.31108e-06	3.67925e-05	365.7	411.578	443.708	557.965	547.928	546.702
FUT8	3703.48	-0.22929	0.0486245	-4.71553	2.41088e-06	3.82965e-05	3914.77	4112.5	3960.26	3579	3354.25	3300.13
FAM78A	683.173	-0.390524	0.0828182	-4.71543	2.41197e-06	3.82965e-05	850.76	729.019	749.448	612.424	547.928	609.458
PPA1	1134.89	0.334295	0.0709624	4.71087	2.46662e-06	3.91122e-05	906.631	1024.57	1079.47	1317.52	1210.33	1270.81
PYGO2	455.877	-0.431773	0.0917198	-4.70753	2.50741e-06	3.97062e-05	548.55	529.797	492.274	365.926	410.113	388.605
PNPO	316.958	0.505622	0.107465	4.705	2.53868e-06	4.01482e-05	250.149	287.886	247.241	366.881	377.882	371.709
NRAP	83.808	0.958639	0.203776	4.70437	2.54649e-06	4.02184e-05	55.8708	64.5827	50.7726	106.052	106.696	118.875
RABGGTA	184.153	0.672835	0.143185	4.69905	2.6138e-06	4.12269e-05	158.724	146.679	122.517	223.568	207.835	245.594
LOC527388	60.6946	-1.20533	0.256586	-4.69757	2.63277e-06	4.14713e-05	79.9968	79.9074	93.819	53.5035	25.5626	31.3781
NCKAP1L	3045.73	-0.2192	0.0467143	-4.69236	2.70076e-06	4.24862e-05	3324.31	3197.39	3307.95	2871.04	2791.88	2781.79
KIFC3	674.279	-0.406964	0.086767	-4.69031	2.72786e-06	4.28561e-05	855.839	678.666	773.73	553.188	593.496	590.752
KIF1B	1298.1	-0.286438	0.0610891	-4.68885	2.7474e-06	4.31064e-05	1376.45	1482.12	1419.43	1132.17	1204.78	1173.66
REPS2	661.024	0.364447	0.0777309	4.68857	2.75115e-06	4.31086e-05	567.597	553.879	611.479	742.361	754.652	736.177
BCLAF1	5615.78	0.237257	0.0506311	4.68599	2.78612e-06	4.35993e-05	4738.86	5341.76	5381.9	6065.01	6026.1	6141.05
LOC100847947	1233.39	0.324267	0.0692631	4.68167	2.8455e-06	4.44703e-05	989.167	1097.91	1195.36	1400.65	1377.04	1340.2
ITPK1	794.204	-0.360909	0.0771442	-4.67837	2.89166e-06	4.51325e-05	977.739	847.238	856.512	662.106	710.195	711.437
DIS3	776.347	0.375735	0.0803511	4.67616	2.92296e-06	4.55616e-05	595.532	718.072	709.713	869.432	916.918	848.414
HNRNPA0	2760.39	0.22947	0.0491087	4.67269	2.97276e-06	4.62774e-05	2628.47	2485.89	2513.24	2904.48	2990.82	3039.45
MEF2D	2988.69	-0.265832	0.0571121	-4.65457	3.24664e-06	5.04751e-05	3497	3157.99	3136.86	2548.1	2836.33	2755.84
TTC7A	718.047	-0.34695	0.0745655	-4.65295	3.27217e-06	5.07845e-05	832.983	790.317	789.183	606.692	651.29	637.819
HIST1H1D	86.4728	-1.0937	0.235064	-4.65277	3.27504e-06	5.07845e-05	123.17	130.26	98.234	80.2553	48.9023	38.0157
PALLD	334.099	-0.500265	0.107543	-4.65176	3.29116e-06	5.09682e-05	370.779	437.849	366.446	266.562	274.52	288.437
ZNF654	637.307	0.468943	0.100877	4.64866	3.34101e-06	5.16732e-05	434.269	590.001	577.263	667.838	793.551	760.918
RDH11	1663.24	0.260381	0.0560164	4.6483	3.34684e-06	5.16745e-05	1450.1	1563.12	1526.49	1837.27	1784.93	1817.51
CSGALNACT1	275.849	-0.529843	0.113991	-4.64812	3.34975e-06	5.16745e-05	308.559	318.535	352.097	229.301	210.058	236.542
TTLL11	238.75	0.56606	0.121806	4.64724	3.36403e-06	5.18278e-05	194.278	186.086	197.572	262.74	296.748	295.074
CTDSP2	980.64	-0.31073	0.0668828	-4.64589	3.38611e-06	5.21007e-05	1083.13	1137.31	1036.42	885.674	873.573	867.724
KIF23	1025.38	0.316777	0.0682746	4.63975	3.48826e-06	5.36034e-05	855.839	970.93	909.492	1130.26	1173.66	1112.11
MAN1C1	556.233	-0.386017	0.0832858	-4.63485	3.57196e-06	5.48191e-05	609.5	625.029	655.629	508.283	463.461	475.498
PTEN	1326.7	0.313355	0.0676604	4.6313	3.63384e-06	5.56972e-05	1107.26	1204.08	1231.79	1528.67	1527.09	1361.32
CEACAM1	369.344	-0.477774	0.103182	-4.6304	3.64954e-06	5.5866e-05	452.046	419.24	416.115	290.448	346.762	291.454
RPF2	368.541	0.472602	0.1021	4.62881	3.6777e-06	5.62251e-05	300.941	294.453	331.126	456.691	398.998	429.035
MTREX	936.849	0.334672	0.0723242	4.62739	3.70303e-06	5.65398e-05	755.526	880.076	846.578	1072.94	1055.85	1010.13
ND4	39054.6	0.235749	0.0509555	4.62657	3.71779e-06	5.66928e-05	32496.5	37493	37617	42567.8	42426.1	41727.4
CITED2	293.168	0.517548	0.111897	4.62522	3.74198e-06	5.69888e-05	242.53	217.83	262.693	341.085	354.542	340.331
IVD	823.267	0.325638	0.0705009	4.61891	3.85753e-06	5.86738e-05	754.256	710.41	728.477	937.267	898.024	911.17
PYCR2	343.985	-0.463677	0.100394	-4.61859	3.86362e-06	5.86917e-05	405.063	386.402	403.973	296.18	292.302	279.989
CBX2	747.666	-0.344675	0.0746339	-4.61821	3.87063e-06	5.87233e-05	883.775	789.223	836.644	668.794	661.293	646.267
RASAL1	302.362	-0.551428	0.119439	-4.6168	3.89703e-06	5.90488e-05	408.873	339.333	330.022	215.925	275.631	244.387
SETD6	133.818	0.749757	0.162483	4.61436	3.943e-06	5.96698e-05	92.6948	97.4214	108.168	158.6	186.718	159.304
UBC	1965.94	-0.266396	0.0578592	-4.60422	4.14008e-06	6.25728e-05	2239.91	2094.01	2112.58	1853.51	1666.01	1829.58
VAT1	755.166	-0.334034	0.0725729	-4.60274	4.16965e-06	6.29401e-05	865.998	850.522	811.258	679.304	653.513	670.404
RAB12	367.214	0.464881	0.10105	4.6005	4.2147e-06	6.35398e-05	288.243	330.576	304.636	434.716	439.009	406.104
EIF4A2	1998.55	0.264255	0.0574832	4.59708	4.28462e-06	6.45124e-05	1711.68	1857.57	1879.69	2245.24	2071.68	2225.43
MOB1A	2099.1	0.282677	0.0615187	4.59498	4.32789e-06	6.50818e-05	1770.09	1949.52	1954.75	2344.6	2432.89	2142.76
PPP1R18	1263.92	-0.294474	0.0641015	-4.59388	4.35082e-06	6.53444e-05	1438.67	1443.81	1298.01	1111.15	1123.64	1168.23
MINPP1	457.029	0.451241	0.0982709	4.59181	4.39418e-06	6.59127e-05	333.955	424.713	396.247	531.213	554.597	501.445
MYO1G	1004.22	-0.298172	0.0650098	-4.58657	4.50582e-06	6.75024e-05	1149.16	1091.34	1083.88	894.273	899.136	907.55
BCL2	440.091	0.415172	0.0905803	4.58346	4.57335e-06	6.84284e-05	377.128	371.077	383.002	491.086	516.809	501.445
LIN7C	536.313	0.385309	0.0840868	4.58228	4.59927e-06	6.87301e-05	454.585	453.174	487.859	619.112	591.273	611.872
SNN	117.187	0.80312	0.175348	4.58016	4.64618e-06	6.93442e-05	100.314	78.8128	77.2627	138.536	163.378	144.822
CEP250	795.118	-0.350941	0.0766679	-4.57741	4.70763e-06	7.01736e-05	966.311	885.55	823.399	671.66	720.198	703.592
G2E3	699.616	0.386107	0.08444	4.57256	4.81798e-06	7.1729e-05	568.866	576.866	669.978	782.489	852.456	747.039
POLE	1978.01	-0.244881	0.0535584	-4.57222	4.82589e-06	7.17574e-05	2232.29	2095.11	2113.69	1802.88	1771.6	1852.51
SNX4	712.392	0.354719	0.0775989	4.57119	4.84964e-06	7.19313e-05	587.913	651.3	635.761	841.725	763.543	794.106
DEXI	136.905	-0.703707	0.153941	-4.57129	4.84741e-06	7.19313e-05	177.771	168.572	163.355	103.185	101.139	107.409
ORC4	469.059	0.452725	0.0990585	4.57028	4.87072e-06	7.21543e-05	342.844	395.159	447.02	564.653	552.374	512.307
PGS1	389.565	0.453225	0.0992723	4.56548	4.98362e-06	7.37354e-05	342.844	338.238	307.947	431.85	436.787	479.722
PRELID3B	727.04	0.344775	0.0755407	4.5641	5.01643e-06	7.40913e-05	627.277	612.989	682.119	816.884	796.886	826.088
ME2	1248.68	0.286548	0.0627852	4.56395	5.02009e-06	7.40913e-05	1059.01	1144.98	1167.77	1398.73	1382.6	1339
NUFIP2	2626.06	0.24713	0.0541762	4.56159	5.0767e-06	7.48202e-05	2293.24	2456.33	2448.12	2831.86	3004.16	2722.65
PTGES3	5471.27	0.284561	0.062385	4.56137	5.08201e-06	7.48202e-05	4331.26	5155.67	5307.95	6252.27	5947.19	5833.3
STAM2	549.05	0.388745	0.0852436	4.5604	5.10554e-06	7.50741e-05	434.269	495.864	494.481	614.335	636.842	618.51
BOLA-NC1	202.642	0.617452	0.135437	4.55897	5.14039e-06	7.54936e-05	170.152	165.288	145.695	219.747	250.069	264.903
SELENOI	1240.46	0.315359	0.0691801	4.55853	5.15129e-06	7.55607e-05	995.516	1158.11	1157.84	1343.32	1445.95	1342.02
LOC112447756	113.268	-0.787346	0.172788	-4.55671	5.19621e-06	7.61261e-05	156.184	128.071	146.799	75.4782	85.5791	87.4965
RBPJ	526.417	0.399624	0.087725	4.55542	5.22816e-06	7.65002e-05	425.38	476.161	456.954	603.825	630.173	566.012
AP1AR	89.5699	0.900976	0.197956	4.55139	5.32935e-06	7.78854e-05	53.3312	61.2989	72.8477	115.606	110.03	124.305
THUMPD1	1702.43	0.342493	0.0753154	4.54745	5.43003e-06	7.92598e-05	1274.87	1579.54	1645.69	1991.1	1859.4	1863.98
LOC100850276	75.6406	0.991196	0.218302	4.54047	5.61278e-06	8.18273e-05	57.1406	48.1634	47.4614	85.9878	102.25	112.84
DARS	1215.79	0.314286	0.0692464	4.53866	5.66131e-06	8.24342e-05	1001.87	1053.03	1195.36	1383.45	1314.81	1346.24
SC5D	2246.17	0.278859	0.0615788	4.52849	5.94057e-06	8.63922e-05	1831.04	2199.1	2056.29	2513.71	2417.33	2459.56
MGRN1	1140.18	-0.348387	0.0769365	-4.52824	5.9476e-06	8.63922e-05	1443.75	1205.18	1184.33	943.955	1052.51	1011.34
NID1	923.336	-0.304475	0.0672747	-4.52584	6.01555e-06	8.7273e-05	986.628	1026.76	1045.25	835.992	838.008	807.381
MIF	1837.89	-0.312162	0.0690217	-4.52267	6.10649e-06	8.84848e-05	2308.48	1913.4	1888.52	1661.48	1630.45	1625.02
SLC25A1	1802.11	-0.259933	0.0574774	-4.52235	6.11565e-06	8.85102e-05	2073.57	1950.62	1867.55	1605.11	1693.8	1622
RNF19A	1249.6	0.320996	0.0709857	4.52199	6.1262e-06	8.85554e-05	1000.6	1095.72	1234	1413.07	1389.27	1364.95
TM9SF3	3649.83	0.230317	0.0509374	4.52156	6.13848e-06	8.86257e-05	3142.73	3526.87	3401.77	3973.59	4007.77	3846.23
B4GALT4	337.59	0.482353	0.106703	4.5205	6.16925e-06	8.89624e-05	270.466	315.251	259.382	403.187	378.993	398.26
BMP4	631.742	-0.374397	0.0828874	-4.51694	6.27398e-06	9.02571e-05	766.954	707.126	664.459	532.169	585.716	534.03
KLHDC3	888.376	-0.326983	0.0723904	-4.51693	6.27416e-06	9.02571e-05	1064.08	923.861	981.236	773.89	777.991	809.192
ZNF644	1104.35	0.379828	0.0841033	4.51621	6.29552e-06	9.04555e-05	791.08	1037.7	1046.36	1280.26	1261.46	1209.26
N4BP2	1503.24	0.325196	0.0720291	4.51479	6.33804e-06	9.0957e-05	1213.92	1400.02	1383	1601.28	1843.84	1577.35
LIMD2	848.91	-0.321608	0.0712385	-4.51452	6.34599e-06	9.09618e-05	992.977	916.199	923.841	764.336	721.309	774.797
B3GNT2	446.425	0.419855	0.0930177	4.51371	6.37038e-06	9.12019e-05	384.747	397.348	362.031	535.991	515.697	482.739
CPSF6	2433	0.236989	0.0525389	4.51074	6.46011e-06	9.23757e-05	2133.25	2326.07	2238.41	2558.61	2710.74	2630.93
SRGAP3	343.767	-0.459993	0.102055	-4.50729	6.56618e-06	9.37801e-05	397.445	421.43	375.276	278.027	298.971	291.454
CHURC1	761.378	0.346813	0.0769689	4.50589	6.60955e-06	9.42868e-05	615.849	688.517	704.194	895.228	833.562	830.915
NELFB	855.585	-0.338292	0.0751198	-4.50337	6.68846e-06	9.52986e-05	1047.58	912.915	907.285	728.03	777.991	759.711
ARHGAP23	62.2604	1.05862	0.235141	4.50207	6.72944e-06	9.57682e-05	39.3635	40.501	40.8388	82.1661	92.2476	78.4451
H2AFX	532.484	-0.382734	0.0850311	-4.5011	6.76022e-06	9.60917e-05	647.593	579.055	582.781	462.423	459.015	464.033
NAB1	2162.51	-0.244516	0.0543371	-4.49998	6.79596e-06	9.64849e-05	2211.98	2443.2	2376.38	1970.08	2025	1948.46
MRPL44	383.624	0.452663	0.100607	4.4993	6.81776e-06	9.66794e-05	349.193	310.873	314.569	452.869	409.001	465.24
PPM1M	947.922	-0.31843	0.0707989	-4.49766	6.87052e-06	9.73119e-05	1113.61	1036.61	1004.41	885.674	844.676	802.554
SIK1	857.248	-0.310925	0.0691966	-4.49336	7.0109e-06	9.91362e-05	967.581	967.646	913.907	775.801	747.983	770.573
TBK1	554.378	0.395914	0.088114	4.4932	7.01592e-06	9.91362e-05	426.65	522.135	485.651	650.641	619.059	622.13
BCL11A	704.69	-0.353838	0.0788088	-4.48982	7.1283e-06	0.000100605	839.332	723.545	810.154	636.31	605.722	613.079
SSB	1980.67	0.261943	0.058359	4.48847	7.17362e-06	0.000101125	1653.27	1887.13	1860.93	2195.55	2131.7	2155.43
MICAL2	331.892	0.470428	0.104923	4.48355	7.34112e-06	0.000103364	252.688	296.643	284.768	390.767	377.882	388.605
CD276	1859.87	-0.257711	0.0577304	-4.46404	8.04275e-06	0.00011311	2170.07	1984.55	1923.84	1674.85	1712.69	1693.21
PARP3	24.0519	1.80152	0.40359	4.46373	8.05457e-06	0.000113143	8.88854	9.8516	13.245	34.3951	41.1224	36.8089
SERTAD2	1656.98	-0.288281	0.0646313	-4.46039	8.181e-06	0.000114718	1782.79	1825.83	1849.89	1432.17	1648.23	1402.96
ATP2A3	678.736	-0.350502	0.0785832	-4.46026	8.18589e-06	0.000114718	819.015	741.059	724.062	576.118	605.722	606.441
OGFRL1	246.846	0.53904	0.120938	4.45716	8.30533e-06	0.000116255	201.897	218.924	182.119	289.492	305.639	283.006
PRKD2	1273.52	-0.277067	0.062175	-4.45624	8.34084e-06	0.000116616	1481.85	1344.2	1360.93	1160.84	1155.87	1137.45
EZR	4533.22	0.184538	0.0414232	4.45494	8.39158e-06	0.000117188	4265.23	4231.81	4233.99	4841.11	4819.1	4808.08
RASAL3	590.561	-0.389946	0.0876313	-4.44985	8.59296e-06	0.00011986	722.511	594.38	695.364	496.818	505.694	528.6
CD99	1016.06	-0.291032	0.0654587	-4.44604	8.74673e-06	0.000121862	1114.88	1129.65	1113.69	908.604	879.13	950.393
S1PR1	223.414	-0.583538	0.131389	-4.44129	8.942e-06	0.000124438	270.466	301.021	232.892	162.421	187.829	185.855
MEF2C	6624.23	-0.210998	0.0475209	-4.4401	8.99178e-06	0.000124985	6646.09	7240.93	7431.57	6254.18	6123.9	6048.72
ZDHHC9	1235.71	-0.272854	0.0614761	-4.43838	9.06384e-06	0.00012584	1325.66	1348.57	1383	1161.79	1075.85	1119.35
SLAMF1	177.97	-0.611438	0.137861	-4.4352	9.19881e-06	0.000127565	200.627	221.114	222.958	152.867	134.481	135.77
COX7A2L	1344.16	0.288031	0.0649885	4.43204	9.33454e-06	0.000129297	1112.34	1230.36	1288.08	1505.74	1425.95	1502.53
WDR6	1807.25	-0.259288	0.0585336	-4.42973	9.4351e-06	0.000130539	2106.58	1888.22	1915.01	1592.68	1681.57	1659.42
DGKD	4036.7	0.229063	0.0517192	4.42896	9.46865e-06	0.000130852	3965.56	3687.78	3501.1	4214.36	4430.11	4421.29
NT5C2	1005.52	0.304161	0.068703	4.42718	9.54716e-06	0.000131784	839.332	949.038	911.7	1117.84	1074.74	1140.47
KRR1	569.76	0.414146	0.0936012	4.42458	9.66299e-06	0.000133229	438.078	469.593	556.291	700.323	621.282	632.992
SASH3	2162.89	-0.225059	0.0508938	-4.42213	9.77336e-06	0.000134595	2311.02	2373.14	2309.05	2048.42	1958.32	1977.42
CCDC69	3799.94	-0.237245	0.0536657	-4.4208	9.83357e-06	0.000135268	4303.32	3856.35	4182.12	3576.14	3293.13	3588.56
WDR81	804.885	-0.349526	0.0790898	-4.41935	9.89971e-06	0.000136021	944.725	895.401	867.549	631.533	749.095	741.005
KDM4B	637.055	-0.346652	0.0784683	-4.41773	9.97431e-06	0.000136889	746.637	719.167	675.496	560.831	552.374	567.822
CDK19	1929.72	0.287303	0.0650621	4.41583	1.00623e-05	0.000137938	1569.46	1799.56	1838.85	2199.38	2176.15	1994.92
PXYLP1	65.5883	-0.997664	0.225968	-4.41508	1.00974e-05	0.000138261	73.6479	97.4214	90.5077	45.8602	44.4567	41.6363
ACACB	1254.98	-0.266436	0.0604042	-4.41089	1.02947e-05	0.000140801	1329.47	1412.06	1370.86	1145.55	1116.97	1154.95
PIK3AP1	2854.65	-0.212373	0.0481871	-4.40727	1.04682e-05	0.00014301	3030.99	3017.87	3146.8	2685.69	2567.37	2679.2
WNT11	70.6592	-0.948991	0.215342	-4.4069	1.04861e-05	0.000143091	95.2343	95.2321	88.3002	54.4589	46.6795	44.05
GRK6	937.728	-0.307982	0.069903	-4.40585	1.05368e-05	0.000143619	1105.99	1002.67	1007.73	816.884	823.559	869.534
TPCN1	309.93	-0.483417	0.110028	-4.39358	1.11499e-05	0.000151801	369.509	383.118	331.126	237.9	277.854	260.076
GNAI2	4819.72	-0.20215	0.0460142	-4.39321	1.1169e-05	0.000151888	5381.37	5116.26	4979.03	4522	4352.31	4567.32
PC	536.264	-0.393431	0.0896717	-4.38747	1.14679e-05	0.000155775	666.64	569.204	589.404	453.824	496.803	441.706
LOC512869	29.3039	1.58362	0.361316	4.38291	1.17104e-05	0.00015889	15.2375	17.514	11.0375	41.0831	51.1252	39.826
RMI1	641.86	0.366934	0.0838646	4.37532	1.21257e-05	0.000164336	499.028	602.042	580.574	728.03	696.858	744.625
ID3	185.51	-0.595857	0.136242	-4.37352	1.22259e-05	0.000165507	241.26	226.587	201.987	155.733	144.484	143.012
TTC4	432.81	0.403492	0.0922724	4.37284	1.2264e-05	0.000165835	386.017	364.509	366.446	497.774	509.029	473.084
ABCE1	1800.12	0.247109	0.056517	4.3723	1.22943e-05	0.000166057	1549.15	1669.3	1717.44	1983.45	1951.65	1929.75
ZNF146	1533.32	0.287152	0.0656931	4.37112	1.23611e-05	0.000166771	1241.86	1475.55	1421.63	1659.56	1744.92	1656.4
TMEM184B	570.628	0.371259	0.0849556	4.37003	1.24228e-05	0.000167413	533.312	495.864	466.887	644.908	612.39	670.404
ANKRD63	101.41	-0.79224	0.181318	-4.36935	1.24615e-05	0.000167746	140.947	119.314	126.932	72.6119	67.7964	80.8588
PITPNM1	673.213	-0.350737	0.080302	-4.36772	1.25548e-05	0.000168812	817.745	730.113	717.439	561.787	612.39	599.804
EEPD1	37.057	-1.34981	0.309194	-4.36556	1.26798e-05	0.0001703	64.7593	43.7849	50.7726	18.153	25.5626	19.3096
COPB1	1656.79	0.267166	0.0612238	4.36376	1.27845e-05	0.000171514	1396.77	1518.24	1593.82	1885.04	1764.93	1781.91
LOC100848469	34.7042	1.46165	0.335179	4.36079	1.29592e-05	0.000173662	20.3167	21.8924	13.245	63.0577	44.4567	45.2568
PLCG1	666.56	-0.372576	0.0854779	-4.35874	1.30812e-05	0.0001751	824.094	730.113	706.402	533.124	583.494	622.13
NUDT16L1	289.623	-0.490852	0.112663	-4.35683	1.31958e-05	0.000176436	377.128	326.197	313.466	234.078	240.066	246.8
SNX30	328.81	-0.459071	0.105603	-4.34714	1.37924e-05	0.000184208	416.491	365.604	360.927	288.537	266.74	274.558
CRIM1	125.245	-0.752164	0.173143	-4.34419	1.3979e-05	0.00018649	144.756	181.707	143.488	108.918	91.1361	81.4623
MMGT1	559.874	0.380905	0.0877548	4.34056	1.42117e-05	0.000189384	449.506	490.391	517.66	588.539	673.518	639.63
RNF144A	560.484	-0.356294	0.0820997	-4.33977	1.42631e-05	0.000189856	620.928	611.894	655.629	506.373	475.686	492.394
CARNMT1	548.737	0.367594	0.0847605	4.33685	1.44538e-05	0.000192181	441.887	499.148	494.481	610.513	635.73	610.665
TNRC18	2036.12	-0.267066	0.0616225	-4.3339	1.46493e-05	0.000194564	2413.87	2214.42	2047.46	1785.68	1867.18	1888.11
ZMIZ1	3430.73	0.210924	0.0486959	4.33146	1.48127e-05	0.000196515	3335.74	3082.46	3126.93	3579.96	3713.24	3746.06
KMT2C	2073.18	-0.232061	0.0535922	-4.33013	1.49025e-05	0.000197487	2255.15	2279	2183.22	1828.67	1984.99	1908.03
SRSF7	2557.14	0.229093	0.0529284	4.32836	1.50225e-05	0.000198778	2303.4	2285.57	2477.92	2745.88	2674.07	2856.01
ITPKB	609.728	-0.341765	0.0789624	-4.3282	1.50332e-05	0.000198778	708.543	668.814	668.874	523.57	541.26	547.306
LOC112449111	315.636	-0.449261	0.103851	-4.32604	1.51816e-05	0.000200518	354.272	363.415	375.276	271.339	263.406	266.11
INSIG1	3176.9	-0.198318	0.0458557	-4.32484	1.52646e-05	0.000201391	3466.53	3368.15	3348.78	2942.69	3008.6	2926.61
YWHAG	3072.64	0.211331	0.0488741	4.32398	1.53238e-05	0.000201949	2812.59	2928.11	2801.32	3429.96	3233.11	3230.73
TNFAIP1	167.55	0.625917	0.14479	4.32294	1.53963e-05	0.000202681	128.249	141.206	126.932	202.549	186.718	219.646
PPAT	1102.05	0.293118	0.0678287	4.32144	1.55011e-05	0.000203836	923.138	1019.09	1024.28	1247.78	1243.67	1154.35
SIN3A	1087.89	-0.274497	0.0635285	-4.32085	1.55427e-05	0.000204158	1208.84	1193.14	1174.39	997.458	945.815	1007.72
SUN2	714.21	-0.326056	0.0754988	-4.31869	1.56961e-05	0.000205946	838.062	759.668	788.079	616.246	635.73	647.474
NFATC2	1063.3	-0.279448	0.0647172	-4.31799	1.57455e-05	0.000206368	1166.94	1207.37	1123.62	932.49	980.269	969.099
ADD1	2772.26	-0.227191	0.0526707	-4.31343	1.60743e-05	0.000210447	3177.02	2902.94	2891.83	2483.14	2620.72	2557.91
ERBIN	3063.45	0.247282	0.0573607	4.311	1.62518e-05	0.000212537	2572.6	2875.57	2949.23	3292.38	3490.96	3199.96
RBCK1	486.402	0.38425	0.0891854	4.30844	1.64407e-05	0.000214414	453.315	422.524	391.832	541.723	549.04	559.978
C16H1orf21	1642.15	-0.243665	0.0565567	-4.30833	1.64492e-05	0.000214414	1696.44	1799.56	1843.27	1523.89	1499.3	1490.46
NOP58	2788.23	0.215078	0.0499213	4.30834	1.64482e-05	0.000214414	2473.55	2619.43	2647.9	3079.32	2925.25	2983.93
LOC112447294	11.7378	2.95952	0.686991	4.30794	1.64781e-05	0.000214557	2.53958	3.28387	2.2075	20.0638	20.0055	22.3267
LOC617565	40.0004	1.34981	0.313364	4.3075	1.65113e-05	0.000214754	24.126	14.2301	29.8013	58.2806	47.7909	65.7732
VCL	1630.57	-0.250486	0.0581582	-4.30697	1.65506e-05	0.000215031	1695.17	1798.46	1816.78	1543	1499.3	1430.72
FBXO32	49.6041	-1.16625	0.270818	-4.3064	1.65931e-05	0.000215349	81.2666	61.2989	62.9139	40.1276	26.674	25.3438
LOC100847686	317.514	-0.448203	0.104103	-4.30537	1.66709e-05	0.000216124	350.462	365.604	383.002	265.607	270.074	270.334
NOL11	1034.55	0.286715	0.066621	4.30367	1.6799e-05	0.000217549	869.807	968.741	955.85	1149.37	1130.31	1133.23
CLIP1	1338.75	0.252838	0.058799	4.30004	1.70769e-05	0.000220908	1188.52	1243.49	1231.79	1479.95	1445.95	1442.79
LRRC8B	744.545	0.374069	0.08705	4.29718	1.72986e-05	0.000223533	662.831	653.49	624.724	817.839	954.707	753.677
ZDHHC20	1210.13	0.307477	0.0716323	4.29243	1.76731e-05	0.000227924	971.39	1140.6	1126.93	1337.59	1417.06	1267.19
ISG20	18.7622	2.03867	0.474951	4.29238	1.76765e-05	0.000227924	11.4281	4.37849	6.62251	28.6626	28.8968	32.5849
VPREB1	1096.27	-0.306561	0.0714541	-4.29032	1.78417e-05	0.000229558	1339.63	1125.27	1173.29	957.331	1006.94	975.133
MKNK1	945.252	0.295366	0.0688424	4.29047	1.78297e-05	0.000229558	852.03	857.089	837.748	1101.6	993.606	1029.44
PUS1	467.674	0.382081	0.0891247	4.28704	1.81068e-05	0.000232718	401.254	410.483	407.285	503.506	536.814	546.702
GPSM1	985.491	-0.352203	0.0821674	-4.28641	1.81586e-05	0.000233045	1278.68	1002.67	1035.32	857.012	890.244	849.018
SLC1A5	3917.92	0.211869	0.0494327	4.28601	1.81908e-05	0.000233045	3871.59	3481.99	3543.05	4159.9	4202.27	4248.71
ARID5B	563.214	0.387674	0.0904468	4.28621	1.81744e-05	0.000233045	459.664	523.229	476.821	625.8	702.415	591.356
TRAM1	3669.61	0.238902	0.0557614	4.28437	1.8326e-05	0.000234526	3091.94	3488.56	3513.24	4158.94	3934.41	3830.54
GPR180	214.462	0.580394	0.135487	4.28376	1.83765e-05	0.00023492	154.915	167.477	190.949	244.587	292.302	236.542
SUSD6	391.652	0.442488	0.103325	4.28247	1.84834e-05	0.000236034	374.588	324.008	300.221	423.251	452.346	475.498
IPO7	5754	0.237135	0.0554009	4.28035	1.86601e-05	0.000238036	4754.1	5456.69	5632.45	6273.29	6150.58	6256.9
SF3B1	7463.22	0.205544	0.0480253	4.27992	1.86962e-05	0.000238242	6473.4	7273.77	7045.25	7811.51	8201.14	7974.25
HIST1H1C	51.6477	-1.17152	0.273853	-4.27791	1.88657e-05	0.000240145	60.95	77.7182	75.0552	45.8602	25.5626	24.7404
PAPOLA	5720.77	0.221066	0.0517103	4.27509	1.91062e-05	0.000242948	4893.78	5456.69	5494.48	6433.8	6047.22	5998.64
ALPK2	373.009	-0.423149	0.0991278	-4.26872	1.96599e-05	0.000249723	426.65	432.376	424.945	294.269	320.088	339.728
TNFAIP8L1	268.266	-0.479439	0.112355	-4.26717	1.97973e-05	0.0002512	307.289	306.494	322.296	230.256	227.84	215.422
PLD4	744.812	-0.320749	0.0751829	-4.26625	1.9879e-05	0.000251969	864.728	828.629	790.287	627.711	676.853	680.662
RASGRP1	2019.4	-0.236256	0.0554072	-4.26399	2.0081e-05	0.00025399	2054.52	2211.14	2283.66	1843.96	1890.52	1832.6
AGMAT	138.302	0.66681	0.156382	4.26399	2.00809e-05	0.00025399	107.932	114.935	98.234	165.288	167.824	175.596
HNRNPAB	7773.13	0.172389	0.0404344	4.26342	2.01324e-05	0.000254371	7296.22	7300.04	7335.54	8404.83	7954.41	8347.77
MIR6531	28.2833	-1.57292	0.368982	-4.26286	2.01831e-05	0.000254742	41.9031	45.9741	38.6313	22.9301	10.0027	10.2582
CYBA	1144.44	-0.275926	0.0647494	-4.26144	2.03118e-05	0.000256095	1332.01	1218.31	1213.02	1057.65	1004.72	1040.91
CPT1A	1503.2	-0.245578	0.0576943	-4.25654	2.07614e-05	0.000261489	1650.73	1595.96	1643.49	1339.5	1434.84	1354.69
RRBP1	1055.1	-0.280796	0.066018	-4.25333	2.10615e-05	0.000264788	1193.6	1094.62	1185.43	980.261	926.921	949.79
DYNC2H1	522.664	0.368685	0.0866828	4.25326	2.10677e-05	0.000264788	436.808	443.322	486.755	610.513	590.162	568.425
SV2A	151.508	-0.643784	0.151379	-4.25279	2.11122e-05	0.000265068	186.659	179.518	187.638	101.275	134.481	119.478
OSBPL6	1067.94	0.272709	0.0641965	4.24803	2.15658e-05	0.000270478	935.836	976.403	987.858	1200.01	1159.21	1148.32
ZCCHC18	20.197	1.92802	0.454301	4.24392	2.1965e-05	0.000275196	6.34896	12.0408	6.62251	25.7963	37.7882	32.5849
HMGCR	12749.4	0.172967	0.0407719	4.2423	2.21236e-05	0.000276893	11697.3	12313.4	11943.7	13999.8	13307	13235.5
PLXNB2	629.962	-0.349347	0.0823797	-4.2407	2.22828e-05	0.000278593	769.493	697.274	653.421	545.545	546.817	567.219
QTRT2	450.465	0.4373	0.103157	4.23917	2.24346e-05	0.000280198	333.955	409.389	403.973	575.163	466.795	513.514
APOBEC3Z2	143.928	0.670862	0.158273	4.23863	2.24891e-05	0.000280585	102.853	106.178	124.724	160.511	175.604	193.699
TTC14	393.277	0.431303	0.10185	4.2347	2.28858e-05	0.000285237	286.973	355.752	359.823	452.869	460.126	444.12
ZGRF1	794.009	0.330876	0.0781408	4.23436	2.29203e-05	0.000285369	639.975	776.087	690.949	884.719	905.804	866.517
NXT1	524.186	-0.371343	0.0877788	-4.23044	2.33232e-05	0.000290082	647.593	561.541	566.225	442.359	464.572	462.826
IER5	873.957	-0.296882	0.0702554	-4.22576	2.38139e-05	0.000295878	962.502	995.012	932.671	746.183	816.891	790.486
IMPA2	1293.29	-0.27222	0.0644789	-4.22184	2.42314e-05	0.000300752	1523.75	1370.47	1355.41	1158.92	1142.54	1208.66
LOC101902555	261.817	0.487964	0.115613	4.22068	2.43566e-05	0.000301992	215.864	204.694	232.892	300.002	314.531	302.919
INF2	254.91	-0.52963	0.125681	-4.21409	2.50783e-05	0.000310617	355.542	269.277	279.249	203.504	216.726	205.164
PLEKHG1	280.574	0.484759	0.115083	4.21224	2.52848e-05	0.00031285	248.879	223.303	230.684	297.136	340.093	343.348
ABCC3	252.04	-0.491814	0.116846	-4.20907	2.56423e-05	0.000316945	314.908	276.939	292.494	201.594	214.503	211.802
QKI	5299.62	0.194631	0.0462684	4.20658	2.5927e-05	0.000320133	4716	4973.96	5131.35	5751.63	5742.69	5482.11
CYB5B	2400.82	0.218625	0.0520223	4.20252	2.63961e-05	0.000325588	2261.5	2251.64	2147.9	2658.93	2475.12	2609.81
MAN2B1	1690.91	-0.240135	0.0571499	-4.20184	2.64754e-05	0.00032623	1930.08	1797.37	1768.21	1510.52	1578.21	1561.06
EIF2S1	1513.84	0.300268	0.0715108	4.19891	2.68203e-05	0.000329799	1179.64	1450.37	1437.09	1740.78	1632.67	1642.52
CAPG	2003.03	-0.225058	0.0535966	-4.19911	2.6797e-05	0.000329799	2153.57	2154.22	2173.29	1889.82	1754.93	1892.34
MYC	2505.12	0.22298	0.0531221	4.19749	2.69886e-05	0.000331526	2420.22	2307.46	2213.02	2753.52	2588.49	2747.99
MYO9B	2106.19	-0.227955	0.0543504	-4.19417	2.73877e-05	0.000336083	2349.11	2288.86	2176.6	1896.51	2021.67	1904.41
NHLRC2	326.677	0.458847	0.109483	4.19103	2.77689e-05	0.000340357	265.386	287.886	269.316	372.614	417.893	346.969
MYCL	215.092	0.539006	0.128615	4.19083	2.7793e-05	0.000340357	193.008	168.572	164.459	267.518	255.626	241.37
RGL2	690.364	-0.351206	0.0838409	-4.18896	2.80242e-05	0.000342837	862.188	752.006	711.92	587.583	591.273	637.216
RHOBTB1	334.895	-0.430583	0.102803	-4.18842	2.80901e-05	0.00034294	412.682	368.888	373.068	288.537	278.965	287.23
IRAK4	651.91	0.327531	0.0781963	4.18857	2.80714e-05	0.00034294	547.28	591.096	593.819	719.431	750.206	709.627
LOC615112	214.056	0.568928	0.135844	4.18811	2.81284e-05	0.000343057	142.217	189.37	185.43	269.428	231.175	266.713
HAUS6	1063.13	0.26831	0.06414	4.18318	2.87454e-05	0.000350225	935.836	966.552	990.066	1190.45	1146.98	1148.92
SMPD1	180.467	0.595858	0.142501	4.18143	2.89676e-05	0.000352572	161.263	133.544	137.969	232.167	193.386	224.474
HDGFL3	867.812	0.306924	0.073407	4.18113	2.90068e-05	0.000352689	711.083	811.115	801.324	955.42	998.052	929.877
SYNE1	1017.33	-0.289629	0.0693046	-4.17907	2.927e-05	0.000355528	1074.24	1147.16	1130.24	898.095	984.715	869.534
TSG101	509.065	0.388102	0.092899	4.17768	2.94499e-05	0.000357349	383.477	456.458	481.236	600.004	562.377	570.839
EGR1	2269.99	0.271115	0.064993	4.17145	3.02667e-05	0.000366887	2076.11	2250.54	1844.37	2392.37	2580.71	2475.85
CSTF1	810.922	0.301209	0.0722141	4.17105	3.03199e-05	0.00036716	688.227	760.763	728.477	917.203	894.69	876.172
ULBP3	162.415	0.607307	0.145612	4.17071	3.03651e-05	0.000367334	124.44	130.26	132.45	188.218	186.718	212.405
SNAP25	107.887	0.744121	0.17859	4.16665	3.09109e-05	0.000373558	77.4573	89.759	73.9514	139.491	141.15	125.512
ZUP1	371.003	0.413161	0.0991805	4.16575	3.10331e-05	0.000374656	319.987	310.873	322.296	440.449	432.341	400.07
POLR2K	245.593	0.523044	0.125629	4.16341	3.13525e-05	0.00037813	177.771	209.073	218.543	268.473	282.3	317.401
MLLT1	1188.14	-0.275563	0.0661964	-4.16281	3.14352e-05	0.000378745	1359.95	1251.15	1299.12	1062.43	1016.95	1139.26
ITGAL	3058.83	-0.193043	0.0464081	-4.15968	3.18689e-05	0.000383197	3203.68	3257.6	3330.02	2862.44	2805.21	2894.02
TBC1D14	1536.8	-0.235839	0.0566935	-4.15989	3.18406e-05	0.000383197	1725.65	1625.51	1637.97	1413.07	1391.49	1427.1
CROT	223.991	0.566052	0.136115	4.15864	3.20149e-05	0.000384565	157.454	176.234	205.298	263.696	302.305	238.956
PPRC1	1009.95	0.287779	0.0692059	4.15831	3.20616e-05	0.00038474	947.264	886.644	897.351	1036.63	1138.09	1153.75
NBN	622.542	0.376509	0.0905737	4.15694	3.22545e-05	0.000386665	467.283	616.272	538.631	702.234	723.532	687.3
RBM14	1582.06	-0.260345	0.0626742	-4.15394	3.26793e-05	0.000391365	1814.53	1779.86	1579.47	1404.47	1474.85	1439.17
ADORA2B	576.3	-0.339054	0.0816755	-4.15123	3.30693e-05	0.000395638	629.816	676.477	623.62	525.481	504.583	497.825
PIK3CA	713.181	0.355783	0.0857224	4.15041	3.31878e-05	0.000396659	532.042	664.436	677.704	789.177	818.002	797.727
RNF141	604.351	0.352808	0.085095	4.14604	3.3827e-05	0.000403895	497.758	530.892	559.602	677.393	726.866	633.595
PSMA3	1361.96	0.265198	0.0639735	4.14544	3.39155e-05	0.000404547	1177.1	1232.54	1302.43	1554.47	1401.5	1503.73
EXOSC6	616.391	-0.347946	0.0839535	-4.14451	3.40545e-05	0.000405799	760.605	639.259	672.185	556.054	536.814	533.427
C1D	513.491	0.372804	0.0899961	4.14245	3.43622e-05	0.000409057	403.794	457.552	477.925	593.316	596.831	551.53
RAD50	2063.95	0.263301	0.0635812	4.14118	3.45525e-05	0.000410913	1678.66	1962.66	1982.34	2342.69	2231.72	2185.6
ATP1A1	4465.52	-0.192528	0.0464965	-4.1407	3.4624e-05	0.000411354	4864.57	4667.47	4761.59	4322.32	3975.54	4201.64
ARL5B	188.278	0.566675	0.137106	4.13313	3.57864e-05	0.000424741	156.184	141.206	156.733	227.39	241.177	206.974
FOXO3	127.72	-0.672403	0.162749	-4.13154	3.60338e-05	0.000427253	152.375	156.531	162.252	84.0769	106.696	104.392
YARS	1666.85	0.243988	0.059067	4.13069	3.61669e-05	0.000428333	1545.34	1529.19	1507.73	1890.78	1688.24	1839.84
FUBP1	2886.3	0.190953	0.0462299	4.13051	3.61966e-05	0.000428333	2665.29	2705.91	2715.23	3046.83	3091.96	3092.55
BFAR	1003.73	0.273829	0.066319	4.12897	3.644e-05	0.000430785	887.584	950.132	886.313	1090.13	1128.09	1080.13
FADS3	444.046	-0.374747	0.0908308	-4.12577	3.69492e-05	0.000436373	514.265	517.756	473.51	390.767	374.547	393.433
USP2	83.1179	-0.840408	0.203761	-4.12448	3.71579e-05	0.000438404	118.091	96.3268	104.856	69.7457	57.7936	51.8945
LOC107131749	22.4359	1.73217	0.420057	4.12365	3.72923e-05	0.000439556	7.61875	12.0408	11.0375	37.2614	38.8996	27.7575
NUP210	2408.48	-0.239459	0.0581484	-4.11806	3.82069e-05	0.000449892	2834.17	2561.42	2429.36	2211.8	2233.95	2180.17
PMM2	1028.42	0.27164	0.0660968	4.10973	3.96118e-05	0.000465215	961.232	898.685	939.293	1113.06	1093.63	1164.61
MIER1	693.669	0.357597	0.0870073	4.10997	3.95717e-05	0.000465215	535.852	695.085	591.611	759.559	792.44	787.468
ZBTB33	525.727	0.355445	0.0864903	4.10965	3.96251e-05	0.000465215	427.92	489.296	464.68	577.074	611.279	584.115
SAV1	366.127	0.427538	0.104095	4.10721	4.00472e-05	0.000469708	290.782	292.264	352.097	429.939	426.784	404.898
FBH1	808.595	0.295398	0.0719749	4.10418	4.0576e-05	0.000475444	752.986	700.558	726.269	921.98	859.125	890.654
SLC38A10	1310.05	-0.273419	0.0666473	-4.10247	4.08765e-05	0.000478495	1544.07	1406.59	1356.51	1136.95	1165.88	1250.29
PPP1CB	4106.79	0.229508	0.0559592	4.10134	4.10762e-05	0.000480362	3422.09	3890.29	4024.28	4457.99	4505.68	4340.43
ARHGEF10L	130.432	-0.653153	0.159427	-4.09689	4.18741e-05	0.000489215	173.961	147.774	157.837	98.4082	97.8046	106.806
LSM14B	1681.26	-0.229789	0.0561474	-4.09261	4.2655e-05	0.00049785	1893.26	1759.06	1795.81	1518.16	1541.53	1579.76
STAC2	643.717	-0.321006	0.0784974	-4.08938	4.32523e-05	0.000504328	731.4	742.154	671.081	570.386	581.271	566.012
HLTF	2891.79	0.257272	0.0629343	4.08795	4.35198e-05	0.000506952	2336.42	2712.47	2850.99	3257.98	3093.07	3099.79
CDC40	464.453	0.380237	0.0930266	4.0874	4.36237e-05	0.000507667	372.049	409.389	427.152	559.876	516.809	501.445
KCTD12	10071	-0.186443	0.0456697	-4.08242	4.45692e-05	0.000518166	10091	11033.8	11030.9	9268.53	9731.56	9270.4
LOC100141258	10.0313	3.22335	0.790286	4.07871	4.52865e-05	0.000525993	2.53958	2.18924	1.10375	18.153	21.1169	15.0856
TICAM2	404.035	0.412545	0.101152	4.07847	4.53332e-05	0.000526024	307.289	375.455	354.305	488.22	465.683	433.258
LOC100847119	459.532	-0.373057	0.0915191	-4.07628	4.57629e-05	0.000530494	548.55	533.081	475.717	391.722	398.998	409.122
PDZRN3	26.4734	-1.50115	0.368371	-4.07511	4.59934e-05	0.000532649	34.2844	45.9741	37.5276	8.59878	15.5598	16.8959
MXD3	161.005	-0.609059	0.149511	-4.07366	4.628e-05	0.000535448	206.976	191.559	183.223	116.561	150.041	117.668
SNAP23	461.128	0.386717	0.0949965	4.07086	4.68408e-05	0.000541412	349.193	434.565	413.907	534.08	511.252	523.772
MRPL32	249.801	0.488516	0.120013	4.07051	4.69096e-05	0.000541684	186.659	213.451	221.854	301.913	296.748	278.179
LPCAT2	48.949	1.09939	0.270425	4.06541	4.79483e-05	0.000553143	39.3635	26.2709	28.6976	64.0131	61.1279	74.2212
KIF18A	525.868	0.367967	0.0905271	4.06472	4.80908e-05	0.000554251	406.333	475.066	494.481	621.023	572.379	585.925
ZCCHC11	1618.7	0.25798	0.0634788	4.06403	4.82328e-05	0.000555352	1337.09	1579.54	1502.21	1749.37	1804.94	1739.07
PAICS	4267.14	0.237368	0.0584447	4.06141	4.87768e-05	0.000561075	3623.98	3841.03	4283.66	4840.16	4433.44	4580.59
MDM2	1630.59	0.238559	0.0587554	4.0602	4.90308e-05	0.000563453	1391.69	1534.66	1559.6	1761.79	1767.15	1768.64
AHNAK	2554.7	-0.219354	0.0540285	-4.05996	4.90807e-05	0.000563484	2638.63	2855.87	2748.34	2241.42	2470.68	2373.27
LOC112448004	134.394	-0.644044	0.158667	-4.05909	4.92633e-05	0.000565037	143.486	176.234	172.185	101.275	103.362	109.823
TSPAN12	4110.39	0.190607	0.0469613	4.0588	4.9326e-05	0.000565213	3683.66	3845.41	3985.65	4508.63	4317.85	4321.12
GUCD1	792.8	-0.300653	0.0740787	-4.05856	4.93753e-05	0.000565236	938.376	847.238	843.267	698.412	695.747	733.764
RAB11FIP5	802.532	-0.293508	0.0723526	-4.05663	4.97866e-05	0.000569399	933.296	841.765	877.483	705.1	734.646	722.902
LIPA	439.957	0.382389	0.094294	4.05528	5.00741e-05	0.000571592	369.509	417.051	358.72	518.793	485.689	489.98
FPGT	143.803	0.629764	0.155289	4.05543	5.00412e-05	0.000571592	107.932	111.651	118.102	190.129	174.492	160.511
PAQR8	350.921	-0.404535	0.0997701	-4.05467	5.02044e-05	0.000572532	382.207	396.253	420.53	301.913	302.305	302.315
NDFIP2	342.738	0.412477	0.101741	4.05419	5.0308e-05	0.000573166	292.052	310.873	279.249	393.633	388.996	391.622
ZFYVE16	695.904	0.319392	0.0788198	4.05218	5.07435e-05	0.000577576	561.248	652.395	641.28	780.578	780.214	759.711
MMP11	34.7732	-1.29144	0.318769	-4.05133	5.0928e-05	0.000579124	53.3312	36.1225	58.4989	21.9747	20.0055	18.7061
RAG2	194.657	-0.560138	0.138324	-4.04947	5.13342e-05	0.000583188	196.818	262.709	236.203	163.377	148.93	159.907
CLSTN1	3365.77	-0.180859	0.0446662	-4.04912	5.14099e-05	0.000583492	3602.4	3605.69	3523.18	3128.04	3148.64	3186.68
TNKS1BP1	573.494	-0.358221	0.0884798	-4.04862	5.15199e-05	0.000584186	721.241	626.124	587.196	517.838	490.135	498.428
RBM17	1341.66	0.239012	0.059053	4.04741	5.17885e-05	0.000586674	1219	1223.79	1249.45	1496.19	1418.17	1443.39
DAG1	1218.45	-0.260153	0.0642924	-4.0464	5.20114e-05	0.000588641	1420.9	1298.22	1264.9	1116.89	1123.64	1086.16
AMER1	542.108	-0.351625	0.0869511	-4.04394	5.25605e-05	0.000594292	567.597	598.758	655.629	453.824	500.137	476.705
HSH2D	638.892	0.357576	0.0884531	4.04255	5.28733e-05	0.000597263	580.295	506.81	596.026	765.291	645.733	739.195
UBE4B	588.302	-0.339038	0.0839027	-4.04085	5.32579e-05	0.000601039	624.737	683.044	666.666	514.016	486.8	554.547
R3HCC1L	330.157	0.449741	0.111368	4.03835	5.38287e-05	0.000606334	241.26	318.535	275.938	399.366	372.324	373.52
ETF1	3793.93	0.20092	0.0497518	4.03845	5.38051e-05	0.000606334	3319.23	3569.56	3697.57	4150.34	4032.22	3994.67
BAHCC1	106.317	-0.725374	0.179648	-4.03775	5.39674e-05	0.000607324	154.915	118.219	124.724	76.4336	83.3562	80.2554
F13A1	295.564	0.486399	0.120606	4.03296	5.50783e-05	0.000619242	208.246	237.533	291.391	364.97	334.536	336.711
FAM69A	551.762	-0.361028	0.0895739	-4.03051	5.56571e-05	0.00062516	594.262	600.948	663.355	531.213	471.241	449.551
SLC45A4	9.35168	3.48591	0.864933	4.03027	5.57135e-05	0.000625206	2.53958	0	2.2075	15.2867	15.5598	20.5164
ZDHHC21	771.716	0.336616	0.08353	4.02988	5.58047e-05	0.000625642	618.388	723.545	700.883	792.043	945.815	849.621
ONECUT2	72.4527	0.88729	0.220211	4.02927	5.5951e-05	0.000626105	46.9823	59.1096	46.3576	82.1661	101.139	98.9616
LOC613985	89.885	-0.818819	0.203209	-4.02943	5.59114e-05	0.000626105	143.486	108.368	92.7152	69.7457	62.2393	62.7561
VPS26C	734.415	-0.313846	0.0779258	-4.0275	5.63724e-05	0.00063023	860.918	779.371	804.636	692.679	605.722	663.163
PRPF38B	1341.55	0.253872	0.0630533	4.0263	5.66611e-05	0.000632866	1145.35	1254.44	1267.11	1434.09	1524.86	1423.48
TMEM182	88.9966	0.823575	0.20457	4.02589	5.6761e-05	0.000633242	50.7916	60.2042	80.5739	114.65	123.367	104.392
ABCB8	558.769	-0.340507	0.0845828	-4.02572	5.68009e-05	0.000633242	656.482	600.948	619.205	506.373	457.904	511.704
IGF2BP3	1355.75	-0.24545	0.0610075	-4.02328	5.73932e-05	0.000639248	1392.96	1493.06	1522.07	1240.14	1277.02	1209.26
FAM117A	428.705	0.381535	0.0948514	4.02245	5.75967e-05	0.000640918	397.445	375.455	346.578	491.086	459.015	502.652
LOC512149	21.5362	1.71785	0.427142	4.02174	5.77691e-05	0.000642237	12.6979	12.0408	5.51876	35.3505	32.2311	31.3781
LCP1	11787.9	-0.168579	0.0419389	-4.01963	5.82906e-05	0.000647433	12127.8	12617.7	12679.9	11576.8	10780.7	10944.3
GYG2	432.816	-0.37471	0.093228	-4.01929	5.83745e-05	0.000647762	479.981	476.161	512.141	357.327	371.213	400.07
LTN1	917.065	0.326301	0.081227	4.01715	5.89074e-05	0.000653068	692.036	893.212	853.201	1007.01	1034.73	1022.2
ST6GALNAC4	490.717	-0.356946	0.0888777	-4.01615	5.91569e-05	0.000654619	582.834	506.81	564.018	438.538	427.895	424.207
ARHGEF1	1813.39	-0.228384	0.0568663	-4.01615	5.91557e-05	0.000654619	2053.25	1865.24	1954.75	1615.62	1683.8	1707.69
TFAM	901.262	0.320172	0.0797264	4.01589	5.92221e-05	0.000654733	704.734	859.279	835.541	1010.83	1055.85	941.342
TBC1D10A	126.252	-0.658558	0.163998	-4.01564	5.92838e-05	0.000654809	172.692	152.153	139.073	90.7649	104.473	98.3581
BIN2	1598.12	-0.231511	0.0577176	-4.0111	6.04363e-05	0.000666922	1762.47	1716.37	1705.3	1464.66	1404.83	1535.11
SNX6	1514.45	0.270587	0.0675404	4.0063	6.16773e-05	0.000679988	1231.7	1475.55	1409.49	1724.53	1585.99	1659.42
RIPOR2	2085.08	-0.203224	0.0507838	-4.00176	6.2874e-05	0.000692542	2229.75	2228.65	2233.99	1968.16	1952.76	1897.17
FAM122A	262.735	0.467539	0.11686	4.00086	6.31126e-05	0.000694529	218.404	240.817	203.09	302.868	295.637	315.591
YTHDC2	462.244	0.374478	0.0936194	4	6.33427e-05	0.000695944	354.272	422.524	429.36	517.838	525.7	523.772
LOC101906477	310.066	0.452712	0.11318	3.99994	6.33577e-05	0.000695944	238.721	246.29	299.117	379.302	351.208	345.762
ASB15	38.7944	1.24313	0.310918	3.99827	6.38079e-05	0.000700245	29.2052	16.4193	24.2826	47.771	51.1252	63.963
LOC112443148	8.8469	3.84605	0.962134	3.99741	6.40389e-05	0.000702134	1.26979	1.09462	1.10375	14.3313	17.7827	17.4993
AKNA	835.817	-0.295792	0.0740154	-3.99636	6.43235e-05	0.000704607	972.66	949.038	842.163	754.782	754.652	741.608
TBC1D23	458.798	0.366157	0.0916635	3.99457	6.48106e-05	0.000709293	388.556	396.253	415.011	522.615	544.594	485.756
MTMR4	2034.41	0.210226	0.0527067	3.9886	6.64634e-05	0.000726715	1937.7	1870.71	1850.99	2122.94	2243.95	2180.17
CNNM3	315.712	-0.432369	0.108422	-3.98785	6.66762e-05	0.000728375	377.128	356.847	353.201	243.632	296.748	266.713
HM13	719.263	0.313649	0.0787021	3.98526	6.74049e-05	0.000735662	685.687	648.016	593.819	770.068	784.66	833.329
TP53INP1	226.842	-0.531995	0.133505	-3.98484	6.75255e-05	0.000736305	248.879	279.129	272.627	202.549	203.389	154.477
GDF11	480.534	-0.352094	0.0883962	-3.98314	6.80107e-05	0.000740919	556.169	518.851	541.942	447.137	404.556	414.552
MYBPHL	457.826	-0.363809	0.0913816	-3.9812	6.85671e-05	0.0007463	548.55	512.283	485.651	379.302	415.67	405.501
TBC1D10B	1171.47	-0.246551	0.0619402	-3.98047	6.87797e-05	0.000747932	1319.31	1257.72	1237.31	1090.13	1064.74	1059.61
ARPP19	1992.06	0.232155	0.0583346	3.97971	6.8999e-05	0.000749634	1710.41	1922.16	1857.62	2145.87	2241.73	2074.57
DCK	776.574	0.352968	0.0887145	3.9787	6.92944e-05	0.000752159	585.374	700.558	754.967	862.744	943.592	812.209
LOC615733	59.5599	0.958033	0.241092	3.97372	7.07596e-05	0.000767366	44.4427	33.9333	43.0463	72.6119	86.6905	76.6349
NTRK3	20.115	1.86806	0.470212	3.97281	7.10288e-05	0.000769586	16.5073	6.56773	3.31126	28.6626	36.6767	28.9644
ZFHX3	429.231	-0.408684	0.102901	-3.97161	7.13879e-05	0.000772775	476.172	513.378	481.236	312.422	387.884	404.294
BOLA-DMA	2075.8	0.223517	0.0563021	3.96995	7.18867e-05	0.000777471	2031.67	1820.36	1898.45	2283.45	2155.04	2265.86
PDP2	444.416	-0.357258	0.0900234	-3.9685	7.23269e-05	0.000781523	493.949	518.851	483.444	395.544	394.553	380.157
TCERG1	1811.7	0.246288	0.0621065	3.96558	7.32176e-05	0.000790433	1558.03	1721.84	1687.64	1859.25	2109.47	1933.97
BAIAP2	72.7413	-0.844618	0.212999	-3.96536	7.3284e-05	0.000790434	86.3458	100.705	93.819	44.9047	53.348	57.3253
ARAP1	1265.63	-0.250811	0.0632805	-3.96348	7.38666e-05	0.000795999	1431.05	1407.68	1288.08	1124.53	1181.44	1160.99
GPN3	266.726	0.457109	0.115403	3.96099	7.46412e-05	0.000803621	236.181	221.114	216.335	300.957	330.091	295.678
TRIO	2058.97	-0.205653	0.0519323	-3.96003	7.494e-05	0.000806112	2231.02	2227.56	2157.84	1858.29	1957.2	1921.91
ZYX	734.483	-0.29748	0.0752998	-3.9506	7.7954e-05	0.000837777	859.649	767.33	802.428	666.883	667.961	642.647
TAX1BP1	908.479	0.298085	0.0755239	3.9469	7.91705e-05	0.000850086	735.209	880.076	826.711	1052.87	980.269	975.737
MAX	564.79	0.318477	0.0807605	3.94348	8.03072e-05	0.000861517	499.028	501.337	507.726	626.755	625.727	628.164
ARMCX2	241.448	0.487036	0.123636	3.93926	8.17319e-05	0.000876014	172.692	215.641	213.024	288.537	287.857	270.937
LOC112449072	184.283	0.553588	0.140604	3.93722	8.24321e-05	0.000881935	134.598	144.49	167.77	204.46	238.955	215.422
STIP1	2023.38	0.211019	0.0535933	3.93742	8.23633e-05	0.000881935	1963.1	1794.09	1871.96	2166.89	2169.48	2174.74
BLK	2430.15	-0.217298	0.0552175	-3.93532	8.30862e-05	0.000888137	2787.19	2581.12	2475.72	2209.89	2212.83	2314.13
SSFA2	1313.59	-0.243472	0.0618881	-3.93407	8.35183e-05	0.000891957	1378.99	1379.22	1514.35	1214.34	1184.77	1209.87
STAG2	3017.99	0.234575	0.059638	3.93332	8.37803e-05	0.000893956	2474.82	2924.83	2915.01	3290.47	3285.35	3217.46
UBE2W	619.867	0.352494	0.0898212	3.9244	8.69471e-05	0.000926918	473.632	581.244	573.951	697.457	742.426	650.491
PER1	132.416	-0.611467	0.155863	-3.9231	8.74179e-05	0.000931106	165.073	155.436	160.044	108.918	100.027	104.996
ZMYM5	365.301	0.408625	0.104182	3.92222	8.77383e-05	0.000933685	273.005	331.671	336.644	421.34	400.11	429.035
GTF2H1	766.179	0.30572	0.0779548	3.92176	8.79036e-05	0.000934612	659.022	688.517	709.713	902.872	774.657	862.293
MDM4	1762.25	0.302962	0.0772749	3.92057	8.834e-05	0.000938416	1472.96	1691.19	1564.02	1758.93	2227.28	1859.15
SLC30A7	567.403	0.326253	0.0832238	3.92018	8.8481e-05	0.000939079	476.172	513.378	518.764	613.38	662.404	620.32
MRS2	367.01	0.391412	0.0999223	3.91716	8.95967e-05	0.000950075	311.099	330.576	309.051	408.92	442.344	400.07
ZEB2	84.8235	0.820885	0.209621	3.91605	9.00128e-05	0.000953641	54.601	59.1096	70.6402	123.249	86.6905	114.651
NUS1	1220.36	0.247437	0.0632031	3.91495	9.04246e-05	0.000957154	1055.2	1136.22	1152.32	1329.94	1362.6	1285.9
SLC4A2	614.854	-0.335514	0.0857647	-3.91203	9.15218e-05	0.00096791	764.414	648.016	647.903	517.838	554.597	556.357
PLCB2	625.033	-0.326103	0.0834143	-3.90944	9.25122e-05	0.000976617	741.558	711.505	635.761	529.303	554.597	577.477
SERTAD1	114.764	0.669344	0.171221	3.90923	9.25905e-05	0.000976617	90.1552	93.0429	82.7814	150.956	132.259	139.391
ARPP21	160.729	-0.593887	0.151912	-3.90941	9.25227e-05	0.000976617	193.008	204.694	179.912	144.268	134.481	108.013
CYBC1	328.43	-0.397244	0.101698	-3.9061	9.37964e-05	0.000988463	372.049	372.172	375.276	289.492	283.411	278.179
BASP1	4740.85	0.165632	0.042408	3.90568	9.396e-05	0.000989314	4450.62	4522.98	4437.08	5002.58	4913.57	5118.24
UHRF1	3234.72	-0.176807	0.0452726	-3.90537	9.408e-05	0.000989705	3490.66	3396.61	3409.49	3035.37	3074.18	3002.03
BOLA-DMB	4389.8	0.188094	0.048177	3.90422	9.45295e-05	0.000993558	4124.28	3949.4	4238.41	4891.75	4535.69	4599.3
FAM173A	316.891	-0.475824	0.121915	-3.90292	9.5041e-05	0.000998056	449.506	321.819	336.644	255.097	266.74	271.541
FLT3LG	162.014	0.603171	0.154624	3.90089	9.58416e-05	0.00100543	153.645	110.557	123.62	176.753	194.498	213.009
SMNDC1	455.317	0.360511	0.0924219	3.90071	9.59118e-05	0.00100543	372.049	425.808	398.455	530.258	484.578	520.755
ASAP1	788.604	-0.306181	0.0785073	-3.90003	9.61801e-05	0.00100648	855.839	901.969	857.616	632.488	760.209	723.505
CNPY3	271.446	-0.466732	0.119672	-3.90009	9.61586e-05	0.00100648	322.527	317.44	305.739	192.039	248.957	241.973
MVD	2120.64	-0.222359	0.0570309	-3.89893	9.66206e-05	0.0010102	2344.03	2378.61	2132.45	1989.18	1881.63	1997.94
LOC101904248	10.8936	2.78265	0.714894	3.8924	9.92566e-05	0.00103685	6.34896	1.09462	1.10375	22.9301	20.0055	13.8788
TWF2	658.4	-0.302686	0.0778238	-3.88937	0.000100504	0.00104897	752.986	722.451	709.713	573.252	573.491	618.51
LIMD1	469.749	-0.381415	0.0980844	-3.88864	0.000100806	0.0010506	559.978	579.055	455.85	396.499	416.781	410.328
LOC100848699	62.4322	0.920778	0.236791	3.88857	0.000100836	0.0010506	49.5219	39.4064	40.8388	93.6311	73.3535	77.8417
FAR1	1087.86	0.255658	0.0657595	3.88777	0.000101168	0.00105313	939.645	1007.05	1024.28	1198.1	1217	1141.07
TIGAR	273.609	0.463712	0.119297	3.88704	0.000101476	0.00105542	205.706	263.804	218.543	314.333	334.536	304.729
EOGT	402.331	0.377106	0.0970228	3.88678	0.000101583	0.00105562	340.304	346.995	360.927	432.805	491.246	441.706
SASS6	494.101	0.375016	0.0965159	3.88554	0.000102103	0.0010601	389.826	475.066	421.633	565.609	600.165	512.307
ST3GAL1	1085.61	-0.249945	0.0643932	-3.88155	0.000103793	0.00107671	1208.84	1187.67	1142.38	951.598	1020.28	1002.89
NOC3L	556.445	0.325933	0.0840045	3.87995	0.000104478	0.00108287	471.093	486.012	524.282	640.131	596.831	620.32
DUSP11	480.208	0.352452	0.0909187	3.87656	0.000105942	0.00109614	417.761	437.849	408.388	579.94	526.811	510.497
METTL4	363.92	0.393845	0.101594	3.87667	0.000105895	0.00109614	283.163	330.576	327.814	409.875	429.007	403.087
GGT1	433.505	-0.3694	0.0953099	-3.87577	0.000106287	0.00109876	542.201	468.498	456.954	370.703	380.104	382.571
MICAL1	2125.79	-0.215725	0.0556903	-3.87366	0.000107213	0.00110737	2377.05	2146.55	2334.44	1972.94	1908.3	2015.44
CD37	2152.86	-0.1971	0.0509365	-3.86952	0.00010905	0.00112538	2347.84	2261.49	2291.39	1957.66	2029.45	2029.32
PCDH7	16.5642	1.91594	0.496137	3.86171	0.000112595	0.00116096	7.61875	4.37849	8.83002	30.5734	24.4512	23.5335
LGALS7	1113.47	-0.291304	0.0754683	-3.85995	0.000113411	0.00116782	1366.3	1117.61	1196.47	1047.14	941.37	1011.94
PI4K2A	391.976	-0.363164	0.0940875	-3.85985	0.000113456	0.00116782	444.427	432.376	447.02	344.907	336.759	346.365
MOB3C	331.251	0.404964	0.104983	3.85745	0.000114578	0.00117835	260.307	304.305	290.287	367.837	376.77	388.002
FMNL1	1167.98	-0.240423	0.0624537	-3.84963	0.000118297	0.00121555	1274.87	1219.41	1303.53	1063.38	1050.29	1096.42
VPS26A	1343.35	0.281202	0.0730585	3.849	0.000118601	0.00121762	1066.62	1283.99	1282.56	1551.6	1482.63	1392.7
TOX	137.742	-0.603236	0.156769	-3.84794	0.000119117	0.00122187	147.296	171.856	178.808	101.275	115.587	111.633
UCHL5	997.54	0.277698	0.0722067	3.84587	0.000120124	0.00123114	815.206	928.24	960.265	1135.99	1056.96	1088.58
SEMA4A	477.231	-0.336976	0.0876319	-3.84536	0.000120377	0.00123268	543.471	545.122	509.934	407.009	431.23	426.621
GMFB	1914.48	0.268054	0.0697234	3.84453	0.000120784	0.00123578	1527.56	1823.64	1853.2	2118.17	2198.38	1965.96
C1GALT1	362.994	0.399468	0.103947	3.84298	0.000121548	0.00124254	286.973	352.468	299.117	400.321	417.893	421.19
RAB43	493.039	-0.348648	0.0907539	-3.84168	0.000122195	0.00124808	599.341	553.879	505.519	414.652	440.121	444.724
LOC112441895	73.117	0.828811	0.215793	3.84077	0.000122651	0.00125167	44.4427	61.2989	51.8764	90.7649	95.5818	94.7376
SH3BP1	656.765	-0.332196	0.0865182	-3.83961	0.000123232	0.00125653	832.983	684.139	681.015	564.653	591.273	586.528
SRRM1	4920.7	0.160161	0.0418005	3.83154	0.000127342	0.00129733	4554.74	4722.2	4664.46	5256.72	5169.2	5156.86
WNT1	61.1559	-0.881055	0.230022	-3.8303	0.000127986	0.00130277	78.7271	86.4752	72.8477	39.1722	44.4567	45.2568
ADRA1B	38.0037	-1.16203	0.303516	-3.82856	0.000128897	0.00131092	63.4896	39.4064	55.1876	25.7963	20.0055	24.137
NTNG2	373.332	-0.379992	0.09928	-3.82747	0.000129466	0.00131559	452.046	411.578	402.87	309.556	342.316	321.625
ING1	466.537	-0.334704	0.0874733	-3.82635	0.000130056	0.00131889	515.535	533.081	512.141	405.098	421.227	412.139
CDKN2D	301.051	-0.412811	0.107889	-3.82626	0.000130105	0.00131889	359.351	329.481	342.163	245.543	274.52	255.248
SYNCRIP	6370.14	0.203631	0.0532198	3.82623	0.000130122	0.00131889	5404.23	6224.02	6131.34	7058.64	6684.06	6718.52
LOC100848315	746.204	0.286692	0.0749412	3.82556	0.000130476	0.00132136	629.816	692.896	692.053	847.457	812.445	802.554
LOC112444921	151.359	-0.559913	0.146659	-3.8178	0.000134648	0.00136245	180.31	174.045	187.638	123.249	115.587	127.322
ZNF672	391.818	0.363413	0.0952175	3.81666	0.000135268	0.00136757	347.923	338.238	342.163	426.117	452.346	444.12
C1H21orf91	329.775	0.465362	0.121962	3.81563	0.000135833	0.00137212	217.134	322.914	288.079	403.187	390.107	357.227
RBM28	536.991	0.330976	0.0867488	3.81534	0.000135998	0.00137262	452.046	504.621	470.199	632.488	564.599	597.993
ZNF507	980.402	0.259145	0.0679304	3.81486	0.00013626	0.00137295	830.443	919.483	926.048	1074.85	1064.74	1066.85
SBDS	1252.1	0.250802	0.0657401	3.81505	0.000136154	0.00137295	1070.43	1192.04	1166.67	1436.95	1301.47	1345.03
FNIP1	1300.95	0.251806	0.0660327	3.81336	0.000137091	0.00138016	1092.02	1215.03	1251.66	1374.85	1484.85	1387.27
AZIN1	4308.45	0.210373	0.0551734	3.81295	0.000137321	0.0013813	3623.98	4216.49	4137.97	4629.01	4722.41	4520.85
ZFAND1	591.758	0.33187	0.0870475	3.81252	0.000137557	0.00138252	459.664	545.122	564.018	666.883	674.63	640.233
AGAP2	631.235	-0.307228	0.0805973	-3.81189	0.00013791	0.0013849	678.068	748.722	667.77	542.678	575.714	574.46
GYPC	23.8652	1.5282	0.401006	3.81092	0.000138448	0.00138797	8.88854	10.9462	16.5563	34.3951	42.2338	30.1712
CCNT1	1531.76	0.221356	0.0580815	3.81113	0.000138334	0.00138797	1339.63	1435.05	1465.78	1651.92	1667.12	1631.06
HS2ST1	1062.15	0.265379	0.06965	3.81018	0.000138865	0.00139098	879.965	1005.96	1005.52	1117.84	1201.44	1162.19
THOC2	1196.22	0.258289	0.06782	3.80845	0.000139839	0.00139956	994.246	1115.42	1156.73	1251.6	1334.81	1324.52
SLF1	428.387	0.358468	0.0941462	3.80757	0.00014034	0.0014034	345.383	392.969	386.313	465.289	501.249	479.119
ZNF207	3343.67	0.199285	0.0523528	3.80658	0.000140901	0.00140783	2891.31	3191.92	3251.65	3502.57	3664.34	3560.2
RNF114	904.58	0.263932	0.0693472	3.80596	0.000141257	0.00141021	835.523	830.818	801.324	1029.94	940.258	989.616
UBE2V2	907.344	0.266892	0.0701328	3.80553	0.000141502	0.00141047	763.144	862.562	843.267	996.503	991.383	987.202
GALNT6	161.552	-0.554074	0.145598	-3.8055	0.00014152	0.00141047	208.246	180.613	186.534	136.625	137.816	119.478
PARP1	10824.3	-0.149559	0.0393246	-3.80321	0.000142835	0.0014224	11555.1	11073.2	11530.9	10395.9	10018.3	10372.3
ABI1	1193.1	0.231366	0.0608389	3.80292	0.000142999	0.00142284	1088.21	1089.15	1113.69	1291.73	1309.25	1266.59
DOC2G	1596.9	-0.242324	0.0637374	-3.80191	0.000143586	0.00142749	1903.42	1646.31	1645.69	1463.7	1449.29	1472.96
SREBF2	7691.27	-0.182324	0.0479807	-3.79995	0.000144726	0.00143763	8739.97	8010.45	7784.77	7036.67	7230.87	7344.88
SLC30A9	826.099	0.282097	0.0743137	3.79603	0.000147031	0.00145931	694.576	772.803	764.9	913.381	948.038	862.896
UBB	5419	0.164948	0.0434716	3.79439	0.000148007	0.00146778	5187.1	4970.68	5175.5	5827.11	5542.63	5810.97
LEKR1	31.333	1.27469	0.335992	3.79381	0.000148356	0.00147001	13.9677	19.7032	20.9713	47.771	43.3452	42.2397
MS4A7	22.7262	1.60725	0.423838	3.79212	0.000149367	0.0014788	10.1583	7.66236	15.4525	34.3951	43.3452	25.3438
HMG20B	469.994	-0.362106	0.0955858	-3.78829	0.00015169	0.00150057	585.374	496.959	507.726	420.385	375.659	433.862
DCPS	362.24	0.39499	0.104288	3.7875	0.000152171	0.00150407	316.178	301.021	324.503	417.518	370.102	444.12
EMID1	681.555	-0.327683	0.0865328	-3.7868	0.000152599	0.00150706	841.872	677.571	760.485	620.068	562.377	626.958
RFX5	822.595	0.270181	0.0713915	3.78449	0.000154024	0.00151987	774.573	707.126	757.174	914.337	880.242	902.119
HDAC5	877.486	-0.305848	0.0808509	-3.78286	0.000155035	0.00152859	1093.29	918.388	900.662	734.718	821.337	796.52
AMD1	1948.01	0.215519	0.0569774	3.78253	0.00015524	0.00152934	1672.31	1866.33	1866.45	2129.63	2080.57	2072.76
ASXL1	1343.08	0.227506	0.0601772	3.78059	0.000156455	0.00153891	1224.08	1243.49	1245.03	1381.54	1485.96	1478.39
ZHX3	361.953	-0.390628	0.103325	-3.78057	0.000156468	0.00153891	431.729	422.524	380.795	321.977	283.411	331.28
SLC38A9	551.783	0.343805	0.0910391	3.77645	0.000159077	0.00156327	427.92	538.554	490.066	648.73	606.833	598.597
ZNF608	3655.96	-0.186122	0.0492967	-3.77555	0.000159656	0.00156767	3665.89	4019.45	3985.65	3500.66	3383.15	3380.99
TTF1	328.93	0.415548	0.110075	3.77512	0.000159929	0.00156907	265.386	269.277	309.051	409.875	371.213	348.779
TFG	940.817	0.265568	0.0703561	3.77463	0.000160245	0.00157087	857.109	904.158	800.221	1053.83	1036.95	992.633
SIRPA	420.197	-0.347046	0.0919774	-3.77316	0.00016119	0.00157884	458.395	478.35	475.717	376.435	354.542	377.743
RIF1	2717.07	0.264255	0.0700558	3.77206	0.000161904	0.00158453	2145.95	2612.86	2642.38	2810.85	3176.43	2913.93
ZRANB2	1245.02	0.237148	0.0629105	3.76961	0.0001635	0.00159884	1071.7	1172.34	1181.02	1352.87	1373.71	1318.48
PPP2R3A	74.6699	0.837372	0.222168	3.7691	0.00016384	0.00159955	59.6802	62.3935	38.6313	104.141	94.4704	88.7033
NUPR1	10.1116	2.72679	0.72345	3.76916	0.000163801	0.00159955	1.26979	1.09462	5.51876	13.3759	18.8941	20.5164
NUDCD1	465.86	0.346975	0.0920795	3.76821	0.00016442	0.0016039	384.747	434.565	408.388	504.462	557.931	505.066
CUX1	3398.3	-0.171419	0.0455153	-3.76619	0.000165757	0.00161562	3667.16	3584.89	3546.36	3149.06	3273.12	3169.18
NAA30	470.503	0.349778	0.0929022	3.76501	0.00016654	0.00162193	373.319	443.322	421.633	519.748	555.708	509.29
MGAT2	828.096	0.274788	0.0730043	3.76399	0.000167222	0.00162724	733.939	752.006	758.278	927.713	945.815	850.828
UBR2	838.841	0.285341	0.0758229	3.76326	0.000167713	0.00163069	706.004	829.724	729.58	916.248	953.595	897.895
LOC101905228	894.535	0.259492	0.0689654	3.76265	0.000168125	0.00163337	835.523	833.008	773.73	976.439	990.272	958.237
EHBP1L1	2667.21	-0.186158	0.0495244	-3.75892	0.000170645	0.00165651	2902.74	2750.79	2863.13	2430.59	2566.26	2489.73
GPBP1	1758.63	0.237581	0.0632295	3.75745	0.000171656	0.00166496	1451.37	1695.57	1690.95	1941.41	1912.75	1859.75
TUBB4B	5994.06	-0.17906	0.0476613	-3.75693	0.000172008	0.00166702	6728.62	6229.5	6141.28	5831.88	5473.73	5559.35
OTULIN	1385.62	-0.217527	0.0579383	-3.75445	0.000173719	0.00168225	1504.7	1453.66	1509.93	1297.46	1289.24	1258.74
UBTF	1786.32	-0.201156	0.0535901	-3.75361	0.000174309	0.00168659	1888.18	1939.67	1903.97	1617.53	1690.46	1678.12
KRAS	576.33	0.361448	0.0963146	3.75278	0.000174883	0.00169077	450.776	567.014	491.17	629.622	720.198	599.2
FAM122B	1041.91	0.258786	0.0690224	3.74931	0.000177322	0.00171296	891.393	963.268	986.755	1178.99	1156.98	1074.09
NEURL1B	63.5657	-0.856071	0.228352	-3.74891	0.000177603	0.00171429	85.076	78.8128	82.7814	37.2614	45.5681	51.8945
LAMP2	1908.06	0.221901	0.0592413	3.74572	0.000179878	0.00173485	1634.22	1802.84	1842.16	2118.17	2078.35	1972.59
LOC100848815	18181.1	0.145093	0.038751	3.74426	0.00018093	0.00174358	16829.8	17563.2	17411.7	19455.2	18506.2	19320.4
LOC112442056	717.01	-0.27818	0.0743015	-3.74394	0.000181157	0.00174437	763.144	774.993	820.088	657.329	632.396	654.112
HNRNPLL	884.891	-0.257192	0.0688123	-3.73759	0.000185794	0.00178758	918.059	970.93	1001.1	809.241	800.22	809.795
NCOR2	1621.1	-0.232094	0.0621631	-3.73363	0.000188737	0.00181443	1880.56	1731.69	1644.59	1425.49	1518.19	1526.06
CXXC5	749.225	-0.287994	0.0772315	-3.72897	0.00019226	0.00184681	844.411	838.481	784.768	708.922	692.412	626.354
XPO1	4573.83	0.248181	0.0666145	3.72562	0.000194832	0.00186723	3597.32	4489.05	4451.43	4993.02	5112.52	4799.64
KLF12	97.9762	0.706828	0.189774	3.72458	0.000195637	0.00186723	85.076	61.2989	77.2627	111.784	131.147	121.288
STK4	703.991	-0.275103	0.0738578	-3.72476	0.0001955	0.00186723	769.493	766.236	778.145	621.023	637.953	651.095
WASF2	3002.94	-0.173716	0.0466267	-3.72567	0.000194796	0.00186723	3236.7	3188.63	3129.14	2791.74	2791.88	2879.54
KLC1	3042.51	-0.177556	0.0476706	-3.72465	0.000195587	0.00186723	3315.42	3137.19	3239.51	2791.74	2859.67	2911.52
AKAP17A	792.161	-0.297007	0.0797409	-3.72466	0.00019558	0.00186723	957.423	814.399	853.201	671.66	700.192	756.09
RPS28	4458.06	-0.230618	0.0619152	-3.72475	0.000195511	0.00186723	5390.26	4473.72	4583.88	4007.99	4016.66	4275.86
LOC107132617	9.48922	2.85055	0.765278	3.72485	0.000195428	0.00186723	2.53958	1.09462	3.31126	23.8855	12.2256	13.8788
RABAC1	1770.09	-0.235345	0.063253	-3.7207	0.000198672	0.00189469	2079.92	1789.71	1877.48	1680.58	1544.87	1647.95
GCLM	352.564	0.395442	0.106296	3.72019	0.00019907	0.00189696	293.322	342.617	277.042	422.296	387.884	392.226
CTSD	662.264	-0.293336	0.0788671	-3.71937	0.000199722	0.00190166	770.763	722.451	694.26	573.252	625.727	587.132
RBM39	3190.01	0.188566	0.0507179	3.71795	0.000200846	0.00191083	2892.58	2955.48	3096.03	3562.76	3284.24	3349
POLE2	456.457	0.345853	0.0931145	3.71428	0.000203781	0.00193722	378.398	426.903	398.455	543.634	506.806	484.55
KIF5B	2485.95	0.21252	0.0572236	3.71386	0.000204125	0.00193894	2114.2	2413.64	2376.38	2617.85	2766.32	2627.31
PEAK1	502.945	-0.315397	0.084943	-3.71304	0.000204787	0.00194369	552.359	546.217	575.055	454.78	437.898	451.361
NEDD4L	550.118	0.314614	0.0848301	3.70876	0.000208278	0.00197525	457.125	510.094	503.311	634.399	585.716	610.062
CTDSP1	936.508	-0.252417	0.0680699	-3.7082	0.000208741	0.00197807	1047.58	1002.67	1003.31	895.228	843.565	826.691
RC3H2	1110.49	0.274677	0.0740777	3.70795	0.000208942	0.0019784	907.901	1076.01	1025.39	1200.01	1305.91	1147.71
VEGFB	349.047	-0.39379	0.106279	-3.70523	0.000211195	0.00199815	426.65	408.294	353.201	319.11	303.417	283.609
ZNF3	691.381	0.280772	0.0757867	3.70476	0.000211589	0.0020003	647.593	593.285	633.554	756.693	750.206	766.952
RAB33B	254.686	0.444395	0.12004	3.70206	0.000213856	0.00202012	210.785	202.505	232.892	317.199	288.968	275.765
TRA2B	4259.29	0.168296	0.0454897	3.69965	0.000215894	0.00203776	3839.85	4064.33	4126.93	4436.01	4555.7	4532.92
XPC	573.769	0.310307	0.0839152	3.69786	0.000217425	0.0020506	535.852	490.391	511.037	597.137	667.961	640.233
PPP1R14B	1102.35	-0.267956	0.0724845	-3.69673	0.000218392	0.00205809	1309.15	1198.61	1104.86	1056.69	991.383	953.41
CCM2	629.279	-0.305289	0.0825926	-3.69633	0.000218743	0.00205977	754.256	661.152	675.496	546.5	545.705	592.562
LRMP	10940.6	-0.152446	0.0412668	-3.69415	0.000220621	0.00207582	11094.2	11685.1	11774.8	10617.6	10087.2	10384.9
HSD17B12	2896.01	0.202609	0.0549144	3.68954	0.000224663	0.00211218	2502.76	2779.25	2790.29	3190.15	3144.2	2969.45
NIPA2	1155.35	0.232027	0.0628983	3.68892	0.000225209	0.00211399	1033.61	1047.55	1105.96	1280.26	1225.89	1238.83
TRAF3IP2	179.408	-0.498413	0.135106	-3.68905	0.000225091	0.00211399	217.134	201.411	211.92	142.358	153.375	150.253
EVI2A	466.295	0.396309	0.107558	3.68461	0.000229055	0.0021484	328.876	413.767	462.472	576.118	515.697	500.842
SQSTM1	2133.08	-0.18493	0.0502118	-3.683	0.000230504	0.00216029	2293.24	2288.86	2227.37	1986.32	2000.55	2002.16
FAM91A1	2025.05	0.20248	0.0549807	3.68275	0.000230735	0.00216076	1782.79	1967.04	1895.14	2161.16	2219.5	2124.66
C5H12orf75	911.366	0.24932	0.0677063	3.68237	0.000231074	0.00216224	805.048	859.279	832.229	1001.28	995.829	974.53
C25H16orf54	701.944	-0.312955	0.0850435	-3.67994	0.000233292	0.00218129	869.807	746.532	719.647	665.928	584.605	625.147
CHD7	11412.9	-0.142701	0.0387854	-3.67925	0.000233919	0.00218544	11981.7	12156.9	11790.3	10569.8	11121.9	10856.8
LDHA	5004.39	0.166336	0.0452494	3.67598	0.000236941	0.00221194	4523	4875.45	4747.24	5434.43	5210.32	5235.91
LOC616611	11.3308	-2.13509	0.580949	-3.67518	0.00023768	0.00221711	19.0469	20.7978	15.4525	5.73252	3.33425	3.62054
TMEM165	1022.43	0.266999	0.0726677	3.67424	0.000238557	0.00222355	938.376	923.861	920.53	1230.58	1065.85	1055.39
DBNDD2	537.929	-0.311651	0.0848926	-3.67112	0.000241487	0.00224911	613.309	552.784	621.413	487.264	477.909	474.895
ESF1	504.439	0.34433	0.0938152	3.67029	0.000242271	0.00225465	384.747	461.931	485.651	584.717	542.371	567.219
CHMP2B	596.979	0.321827	0.0877444	3.66778	0.000244664	0.00227515	458.395	565.92	565.121	664.017	671.295	657.129
LOC614970	9.02488	-2.48885	0.679148	-3.66467	0.000247654	0.00230116	16.5073	13.1355	16.5563	3.82168	1.11142	3.01712
ITPRIPL2	1206.94	0.224766	0.061434	3.65867	0.000253531	0.00235393	1117.42	1114.33	1104.86	1295.55	1345.93	1263.57
PAPOLG	372.706	0.368451	0.100782	3.65591	0.000256268	0.00237381	309.829	306.494	358.72	413.697	432.341	415.156
SRSF11	2857.51	0.190381	0.0520725	3.65607	0.000256113	0.00237381	2557.36	2721.23	2726.27	2903.52	3173.09	3063.58
ABCA1	193.373	-0.503067	0.137601	-3.65599	0.000256191	0.00237381	210.785	211.262	256.071	164.332	171.158	146.632
ETV6	526.99	0.319137	0.0872992	3.65567	0.000256515	0.00237425	435.538	501.337	467.991	612.424	576.825	567.822
GCC2	619.045	0.316843	0.0866858	3.65507	0.00025711	0.00237792	507.916	575.771	566.225	738.54	694.635	631.182
BNIP2	367.84	0.375142	0.102649	3.65463	0.000257557	0.00238021	290.782	350.279	317.881	399.366	439.009	409.725
SLC25A6	5873.61	-0.19429	0.0531993	-3.65211	0.000260095	0.0024018	6844.17	6035.75	5931.57	5488.89	5369.25	5572.02
ZMYM1	714.169	0.310045	0.0849092	3.65149	0.000260725	0.00240577	559.978	678.666	669.978	770.068	850.233	756.09
PLD1	490.003	-0.31966	0.0875788	-3.64997	0.000262269	0.00241814	510.456	547.311	573.951	427.073	440.121	441.103
PPP4R3B	2986.02	0.228917	0.0627262	3.64946	0.000262792	0.00242107	2454.51	2921.55	2865.34	3241.74	3367.59	3065.39
CTC1	519.271	0.326851	0.0895662	3.64926	0.000262992	0.00242107	473.632	494.769	413.907	557.01	594.608	581.701
FRMD6	108.653	-0.647694	0.177568	-3.64758	0.000264723	0.00243512	116.821	136.828	142.384	85.9878	94.4704	75.428
MINDY3	495.878	0.329452	0.0903295	3.64723	0.000265084	0.00243657	440.618	429.092	445.916	580.895	571.268	507.48
CSE1L	2795.1	0.182012	0.0499122	3.64664	0.000265692	0.00244028	2498.95	2668.69	2685.43	3038.24	2964.15	2915.14
PSD2	201.407	0.491517	0.134832	3.6454	0.000266976	0.00245019	168.882	176.234	158.94	216.88	225.618	261.886
LOC618268	132.062	-0.605868	0.166219	-3.645	0.000267394	0.00245214	181.58	139.017	156.733	95.542	121.144	98.3581
LOC101905267	817	-0.264783	0.07265	-3.64464	0.00026777	0.00245371	829.174	921.672	923.841	728.985	744.649	753.677
SOD2	360.619	0.380857	0.10454	3.64318	0.000269289	0.00246573	300.941	294.453	344.371	438.538	382.327	403.087
SUGP2	914.552	-0.29373	0.080664	-3.64141	0.000271154	0.0024809	1025.99	1047.55	947.02	727.075	913.584	826.088
VAV1	1023.18	-0.236553	0.0649655	-3.6412	0.000271371	0.00248099	1145.35	1104.47	1071.74	959.242	923.587	934.704
INPP5B	832.166	-0.262188	0.0720301	-3.63998	0.000272664	0.0024909	932.027	910.726	881.898	796.82	712.418	759.108
FBRSL1	833.763	-0.291046	0.0799676	-3.63955	0.000273116	0.00249312	994.246	929.334	827.814	716.565	806.888	727.729
ESYT1	2526.01	-0.196769	0.0540847	-3.63817	0.000274582	0.00250459	2808.78	2762.83	2520.97	2381.86	2386.21	2295.43
LEO1	477.788	0.327844	0.0901349	3.63726	0.000275558	0.00250961	397.445	457.552	416.115	542.678	513.474	539.461
DDHD1	3207.92	-0.165381	0.0454675	-3.63734	0.000275472	0.00250961	3364.95	3406.46	3399.56	3053.52	3060.84	2962.21
PMS1	480.127	0.350343	0.0963259	3.63706	0.000275763	0.00250961	370.779	445.511	445.916	549.366	570.157	499.032
IKBKE	98.428	-0.66522	0.18299	-3.63529	0.000277667	0.0025249	120.63	110.557	130.243	71.6565	84.4676	73.0143
ARSG	192.43	0.480108	0.132075	3.63511	0.000277866	0.0025249	165.073	164.193	153.422	216.88	224.506	230.508
ITM2C	1025.74	-0.247825	0.068197	-3.63395	0.000279111	0.00253428	1168.21	1036.61	1139.07	946.821	909.139	954.617
ADCY3	13.4482	2.01282	0.554006	3.6332	0.000279924	0.00253974	3.80937	4.37849	7.72627	19.1084	23.3397	22.3267
CD302	676.837	0.30623	0.0842993	3.63266	0.000280519	0.0025432	565.057	635.976	610.375	713.699	826.894	709.023
EIF4G3	3403.36	0.171632	0.0472675	3.63107	0.000282245	0.00255691	3112.26	3174.4	3317.88	3531.23	3599.88	3684.51
HNRNPR	3288.95	0.18991	0.0523495	3.62774	0.000285909	0.00258782	2862.11	3179.88	3174.39	3603.84	3407.6	3505.89
HHEX	690.609	0.298204	0.0822047	3.62758	0.000286091	0.00258782	589.183	669.909	597.13	820.706	740.203	726.523
TPD52	1034.92	0.253602	0.0699506	3.62545	0.000288459	0.0026053	862.188	956.7	1009.93	1132.17	1150.32	1098.23
PRMT1	4060.8	0.17237	0.0475424	3.6256	0.000288287	0.0026053	3924.92	3710.77	3825.61	4404.49	4106.68	4392.32
DAPK1	453.934	-0.325103	0.0896958	-3.6245	0.000289518	0.00261288	516.805	505.716	493.377	420.385	381.216	406.104
TRH	2623.98	0.204258	0.0563726	3.62335	0.000290808	0.00262254	2313.56	2586.59	2409.49	2933.14	2828.55	2672.57
TRIM28	8640.6	-0.1779	0.0491056	-3.62281	0.000291423	0.0026261	9908.18	8760.26	8855.41	8098.14	7999.97	8221.65
HES1	58.8916	-0.871813	0.240727	-3.62159	0.000292798	0.00263651	77.4573	85.3805	65.1214	49.6818	38.8996	36.8089
GIGYF1	868.759	-0.264857	0.0731617	-3.62015	0.000294428	0.00264919	1020.91	938.091	886.313	765.291	816.891	785.055
SLC35A3	166.451	0.532994	0.147277	3.61899	0.000295755	0.00265912	138.407	141.206	126.932	198.727	217.838	175.596
SMCHD1	3068.43	0.240123	0.0663678	3.61807	0.000296811	0.00266661	2430.38	3021.16	2984.55	3349.7	3354.25	3270.56
SP3	1641.62	0.232147	0.0641778	3.61725	0.000297751	0.00267305	1358.68	1595.96	1571.74	1825.81	1741.59	1755.96
MVK	961.963	-0.24927	0.0689174	-3.61694	0.000298109	0.00267425	1122.5	1008.15	1005.52	887.585	872.462	875.568
EXOC5	1239.34	0.263061	0.0727389	3.61651	0.000298596	0.00267661	990.437	1181.1	1203.09	1349.05	1412.61	1299.78
RSBN1	442.373	0.338642	0.0936488	3.61608	0.000299093	0.00267905	355.542	397.348	417.218	482.487	513.474	488.17
RPS29	6223.49	-0.2244	0.062082	-3.61457	0.000300852	0.00269278	7095.59	5945.99	7084.99	5626.47	5512.62	6075.27
CNDP2	2260.73	-0.19128	0.0529276	-3.61399	0.000301521	0.00269675	2537.04	2356.72	2339.96	2156.38	2068.35	2105.95
AKIRIN1	1175.56	0.248713	0.0688665	3.61153	0.000304401	0.00272047	968.851	1095.72	1155.63	1300.33	1275.91	1256.93
BCAS4	573.041	-0.309139	0.0856249	-3.61039	0.000305733	0.00273033	678.068	572.488	653.421	502.551	514.586	517.134
IGF1R	1705.22	-0.198151	0.0549271	-3.60752	0.000309137	0.00275867	1842.47	1776.57	1850.99	1572.62	1558.21	1630.45
DHX36	991.594	0.272351	0.0755387	3.60545	0.000311617	0.00277872	798.699	972.025	919.426	1122.62	1102.52	1034.27
DERL3	311.865	-0.393236	0.109109	-3.60407	0.000313277	0.00279143	374.588	325.103	365.342	259.874	257.849	288.437
TMEM170A	1246.14	0.217242	0.0603739	3.59828	0.000320331	0.00285217	1132.65	1136.22	1187.64	1362.43	1330.37	1327.53
BOD1L1	1683.43	-0.20331	0.056508	-3.5979	0.000320803	0.00285424	1799.29	1848.82	1753.86	1533.45	1634.89	1530.28
A4GALT	407.831	-0.372178	0.103549	-3.59422	0.000325367	0.00289269	488.87	399.537	490.066	355.416	381.216	331.883
RCHY1	403.491	0.360222	0.100242	3.59352	0.000326245	0.00289834	314.908	379.834	365.342	473.888	422.338	464.637
LOC101903526	106.737	-0.669724	0.18645	-3.59197	0.000328186	0.00291341	142.217	101.8	150.11	85.0324	75.5763	85.6862
RAG1	51.259	-0.90824	0.25287	-3.59173	0.000328487	0.00291392	76.1875	58.015	66.2251	37.2614	36.6767	33.1883
GSPT1	3891.65	0.182347	0.0507765	3.59117	0.000329194	0.00291586	3410.66	3671.36	3854.3	4209.58	4050	4153.97
TMEM167A	700.012	0.324473	0.0903496	3.59131	0.000329021	0.00291586	570.136	592.191	697.572	787.266	846.899	706.006
NKAPD1	587.027	0.302012	0.0841621	3.58846	0.000332636	0.00294416	486.33	548.406	540.839	686.947	629.062	630.578
ZNF770	235.263	0.436414	0.121625	3.5882	0.000332963	0.00294487	199.357	203.6	196.468	291.403	260.071	260.679
WDR12	660.554	0.295712	0.0824775	3.58536	0.000336613	0.00297495	556.169	602.042	622.516	761.47	666.85	754.28
EHMT2	1185.38	-0.239411	0.0668069	-3.58363	0.000338847	0.00299248	1391.69	1216.13	1243.93	1058.61	1116.97	1084.96
ASCC2	803.3	-0.276151	0.0770788	-3.58271	0.000340043	0.00300082	932.027	905.253	801.324	707.011	765.766	708.42
EEF2K	2207.27	-0.19018	0.0530931	-3.58201	0.000340959	0.00300668	2248.8	2367.67	2440.4	2117.21	2009.44	2060.09
POLD3	824.183	0.267725	0.0748032	3.57906	0.000344836	0.00303863	749.177	701.653	793.598	947.777	858.013	894.878
LOC100848419	1156.44	0.232461	0.0649573	3.57867	0.000345344	0.00304086	1001.87	1111.04	1075.05	1296.5	1229.23	1224.95
LOC100847604	2216.51	0.232968	0.0651433	3.57624	0.000348573	0.00306671	1824.69	2180.49	2101.54	2384.73	2528.47	2279.13
DEK	3108.15	0.197169	0.0551387	3.57588	0.00034905	0.00306671	2667.83	2979.56	3036.42	3443.33	3275.34	3246.42
MRPS35	241.489	0.428217	0.119747	3.57602	0.000348862	0.00306671	194.278	204.694	217.439	284.715	282.3	265.507
SMAD3	789.648	-0.254102	0.0711914	-3.56927	0.000357971	0.00313873	869.807	868.036	841.059	734.718	693.524	730.747
DPH5	579.331	0.306027	0.0857405	3.56923	0.000358036	0.00313873	504.107	506.81	546.357	642.042	592.385	684.283
STXBP5	1028.2	-0.236845	0.0663554	-3.56934	0.000357887	0.00313873	1069.16	1142.79	1122.52	986.949	933.59	914.188
LAT2	1664.74	-0.199348	0.0558704	-3.56804	0.000359661	0.00314835	1819.61	1744.83	1772.63	1603.19	1542.65	1505.54
EIF4E	1776.27	0.225292	0.063141	3.56808	0.000359607	0.00314835	1536.45	1615.66	1760.49	2026.45	1817.17	1901.39
DDX5	8254.63	0.156519	0.0438728	3.56757	0.000360312	0.00315174	7523.51	7720.37	8176.6	8918.84	8511.23	8677.24
INTS2	1096.59	0.241515	0.0677202	3.56637	0.000361957	0.00316381	935.836	1033.32	1040.84	1201.92	1232.56	1135.04
SLC25A53	79.282	0.737523	0.206843	3.56561	0.000363009	0.00317068	53.3312	56.9204	67.3289	104.141	102.25	91.7205
SERINC2	60.7007	-0.821971	0.230779	-3.56173	0.000368419	0.00321559	81.2666	70.0558	81.6777	39.1722	45.5681	46.4637
PLRG1	757.138	0.263942	0.0741315	3.56046	0.000370204	0.00322174	641.245	703.842	717.439	823.572	832.451	824.277
MLXIP	1055.71	-0.250329	0.0703063	-3.56055	0.000370084	0.00322174	1191.06	1176.72	1071.74	912.426	1032.51	949.79
MRPS34	761.392	-0.274143	0.0769845	-3.56101	0.000369425	0.00322174	888.854	808.926	807.947	672.616	656.847	733.16
UBQLN1	1751.84	0.199268	0.0559626	3.56073	0.000369825	0.00322174	1563.11	1686.81	1639.07	1856.38	1929.42	1836.22
ZNF462	604.617	-0.305309	0.0857998	-3.55839	0.000373134	0.00324488	681.878	668.814	651.214	594.271	537.926	493.601
LMF1	418.567	-0.327361	0.0920317	-3.55704	0.000375051	0.00325917	466.013	471.782	461.369	362.104	364.545	385.588
AHCTF1	2023.11	0.213069	0.0599229	3.55572	0.000376951	0.00327331	1710.41	1983.46	1922.74	2168.8	2232.84	2120.43
MCM10	1973.74	0.196985	0.0554259	3.55402	0.000379391	0.0032921	1763.74	1913.4	1841.06	2167.85	2023.89	2132.5
UBA6	780.578	0.28792	0.0810266	3.5534	0.000380282	0.00329744	628.547	735.586	740.618	914.337	855.791	808.588
ZNF580	232.611	-0.482145	0.135713	-3.55268	0.000381334	0.00330176	321.257	265.993	227.373	173.886	205.612	201.544
TUBGCP2	1316.89	-0.227753	0.0641075	-3.55268	0.000381331	0.00330176	1513.59	1378.13	1375.28	1165.61	1200.33	1268.4
SLC9A3R1	658.62	-0.280535	0.0789945	-3.55133	0.000383296	0.00331634	765.684	714.788	688.742	565.609	606.833	610.062
UAP1L1	261.688	-0.429924	0.121125	-3.54944	0.000386052	0.00333777	325.067	285.696	292.494	246.498	192.275	228.094
NBDY	374.574	0.354328	0.0999506	3.54503	0.000392573	0.0033917	298.401	337.144	348.786	419.429	434.564	409.122
ENAH	1342.12	-0.210809	0.05949	-3.54361	0.000394687	0.00340503	1406.93	1477.74	1432.67	1216.25	1288.13	1230.99
FANCA	836.604	-0.288894	0.0815229	-3.54372	0.00039452	0.00340503	1031.07	881.171	849.889	700.323	790.217	766.952
DACT3	76.8911	-0.745807	0.210502	-3.54299	0.000395615	0.00340811	106.662	94.1375	87.1964	52.5481	68.9078	51.8945
TMEM164	400.324	0.336852	0.0950709	3.54316	0.00039536	0.00340811	354.272	360.131	345.475	443.315	467.906	430.845
PAK2	2901.94	0.19429	0.0548528	3.54202	0.000397068	0.00341816	2554.82	2751.88	2805.74	3137.6	3232	2929.62
LOC100297676	203.279	0.457552	0.129275	3.53936	0.000401094	0.00345033	166.343	171.856	176.6	234.078	223.395	247.404
ATM	865.771	0.277787	0.0785291	3.53738	0.000404121	0.00347387	699.655	857.089	790.287	900.006	965.821	981.771
JAK2	459.332	0.335725	0.0950146	3.5334	0.000410253	0.00352404	365.7	396.253	454.746	505.417	524.589	509.29
FHOD1	509.548	-0.340838	0.0965248	-3.53109	0.00041385	0.00355237	645.054	515.567	550.772	413.697	457.904	474.291
SREBF1	1764.15	-0.249026	0.0705276	-3.5309	0.000414145	0.00355237	2144.68	1879.47	1728.48	1530.58	1626	1675.71
LOC101902048	87.496	-0.698846	0.197963	-3.53019	0.000415261	0.00355938	104.123	106.178	114.79	80.2553	54.4594	65.1698
CRIP1	392.346	-0.357241	0.101251	-3.52828	0.000418273	0.00358262	483.79	400.632	438.19	368.792	328.979	333.694
ELL3	61.3481	0.826766	0.23449	3.52581	0.000422195	0.00361363	41.9031	43.7849	46.3576	76.4336	87.8019	71.8075
EVA1A	74.5367	0.745361	0.21147	3.52467	0.000424016	0.00362662	55.8708	58.015	52.9801	102.23	90.0247	88.0999
AEN	413.622	0.333399	0.0946038	3.52416	0.00042482	0.00363089	384.747	372.172	342.163	474.844	446.789	461.016
LRIG1	89.0413	-0.670668	0.19035	-3.52335	0.000426135	0.00363952	116.821	99.6106	111.479	71.6565	68.9078	65.7732
MNT	165.629	-0.524842	0.148986	-3.52277	0.000427064	0.00364485	223.483	176.234	188.742	122.294	133.37	149.649
ABO	33.1545	1.15044	0.326595	3.52252	0.000427465	0.00364566	17.7771	27.3656	16.5563	46.8156	43.3452	47.0671
TMEM30A	677.784	0.278435	0.0790655	3.52158	0.00042899	0.00365606	563.787	631.597	642.384	752.871	715.752	760.314
ERGIC1	2743.44	-0.165669	0.04708	-3.51889	0.00043336	0.00368541	2943.38	2918.26	2842.16	2574.86	2581.82	2600.15
LURAP1	134.167	-0.54526	0.154952	-3.5189	0.000433338	0.00368541	167.612	155.436	154.525	106.052	113.364	108.013
EPB41L2	2912.51	0.164586	0.0467699	3.51905	0.000433093	0.00368541	2803.7	2757.35	2679.91	3064.03	3084.18	3085.91
CDC27	1561.06	0.246743	0.0701609	3.51682	0.000436748	0.00371158	1257.09	1473.36	1547.46	1712.11	1754.93	1621.4
INTS4	416.888	0.332712	0.0946422	3.51547	0.000438968	0.00372779	359.351	377.645	367.55	466.245	491.246	439.293
ARFIP1	566.215	0.312363	0.0888873	3.51415	0.000441167	0.0037438	444.427	536.365	530.905	636.31	651.29	597.993
TBL1X	2453.47	0.177395	0.0504962	3.51305	0.000442997	0.00375667	2341.49	2289.95	2281.46	2648.42	2499.58	2659.89
IGLL1	445.628	-0.333404	0.0950358	-3.5082	0.000451155	0.00382313	533.312	508.999	451.435	389.811	375.659	414.552
NUP54	608.234	0.283198	0.0807783	3.50587	0.000455112	0.00385393	535.852	572.488	536.424	700.323	656.847	647.474
TTN	9991.88	-0.457288	0.130472	-3.50488	0.000456821	0.00386565	10869.4	12619.9	11195.4	7529.66	9699.33	8037.61
KLF16	703.251	-0.261573	0.0746581	-3.50361	0.000458989	0.00388126	787.271	743.249	769.315	658.284	636.842	624.544
EIF2S2	2022.88	0.184739	0.0527365	3.50306	0.000459941	0.00388655	1813.26	1922.16	1943.71	2170.71	2135.03	2152.41
BOLA-DRA	14610.6	0.158898	0.0453944	3.50039	0.000464578	0.00392295	13129.6	13864.5	14427.1	15859	14765.2	15618.4
MERTK	160.996	-0.499828	0.142828	-3.4995	0.000466133	0.00393331	175.231	188.275	201.987	133.759	133.37	133.357
RBM26	1198.63	0.220479	0.0630195	3.49858	0.000467748	0.00394136	1061.55	1114.33	1142.38	1264.98	1342.59	1265.98
METTL15	167.145	0.506377	0.144738	3.49859	0.000467727	0.00394136	142.217	134.639	139.073	182.485	187.829	216.629
HIP1R	391.601	-0.365816	0.10459	-3.49763	0.000469418	0.00395264	495.219	394.064	437.086	322.932	333.425	366.882
PHAX	700.734	0.261186	0.0747292	3.49511	0.000473874	0.00398736	633.626	631.597	645.695	784.4	766.877	742.212
ANKRD39	226.189	-0.422659	0.120957	-3.49429	0.000475318	0.00399669	259.037	262.709	254.967	201.594	191.164	187.665
RGS4	73	-0.777969	0.222713	-3.49314	0.000477374	0.00401115	83.8062	87.5698	107.064	48.7264	44.4567	66.3767
USP3	1020.37	0.234456	0.0671549	3.49128	0.000480717	0.0040364	877.426	977.498	955.85	1130.26	1091.41	1089.78
DNAJB14	537.91	0.317738	0.0910249	3.49067	0.000481815	0.00403994	439.348	499.148	495.585	550.322	653.513	589.545
ATP6AP2	1158.55	0.241866	0.0692866	3.4908	0.000481579	0.00403994	981.549	1069.45	1133.55	1318.48	1185.88	1262.36
PCNT	943.451	-0.23708	0.0679364	-3.48973	0.000483503	0.00405125	1037.42	1028.95	995.585	824.527	904.693	869.534
BAG5	532.382	0.295897	0.0848426	3.4876	0.000487384	0.00408091	505.377	463.025	465.784	606.692	580.159	573.253
LYSMD2	262.725	0.400274	0.114796	3.48683	0.00048879	0.00408981	219.674	223.303	236.203	314.333	288.968	293.868
PADI2	1676.24	-0.191951	0.0550568	-3.48642	0.000489537	0.00409319	1739.61	1815.98	1806.84	1523.89	1587.1	1583.99
TMCO1	763.42	0.280854	0.0805631	3.48613	0.000490058	0.00409467	688.227	622.84	754.967	863.7	852.456	798.33
MALT1	2616.59	-0.184618	0.0530134	-3.48247	0.00049681	0.00414819	2641.17	2889.8	2813.46	2467.85	2528.47	2358.78
RAB32	539.245	0.305281	0.087669	3.48219	0.000497322	0.00414956	491.409	468.498	486.755	650.641	567.934	570.236
PCBP3	501.913	-0.312954	0.0898989	-3.48117	0.000499219	0.00415186	559.978	511.189	599.338	449.047	427.895	464.033
TMEM87A	537.816	0.310788	0.0892833	3.48093	0.000499684	0.00415186	468.553	512.283	459.161	647.775	556.82	582.304
NEMF	857.008	0.288336	0.0828185	3.48154	0.000498545	0.00415186	656.482	823.156	831.126	961.152	961.375	908.757
ZNF283	274.592	0.422063	0.121238	3.48127	0.000499041	0.00415186	194.278	253.952	253.863	299.046	335.648	310.763
HAUS3	648.646	0.326717	0.0938477	3.48136	0.000498876	0.00415186	487.6	628.313	605.96	770.068	737.98	661.956
UQCR11	655.271	-0.292385	0.083995	-3.48098	0.000499576	0.00415186	806.317	677.571	683.223	603.825	565.711	594.976
ACIN1	2363.96	0.172875	0.0496679	3.48061	0.000500267	0.00415381	2260.23	2164.07	2245.03	2467.85	2514.02	2532.57
HSPA13	563.087	0.286302	0.082287	3.47931	0.000502707	0.00417117	482.521	521.04	518.764	626.755	601.276	628.164
SFXN3	724.352	-0.260171	0.0747858	-3.47888	0.000503507	0.00417201	758.065	826.44	784.768	670.705	635.73	670.404
TIMELESS	1496.63	0.197466	0.0567599	3.47897	0.000503345	0.00417201	1424.71	1409.87	1349.89	1601.28	1587.1	1606.92
ARL14EP	451.974	0.317797	0.0913798	3.47776	0.000505627	0.00418668	394.905	383.118	429.36	517.838	484.578	502.049
CSNK1G2	1635.18	-0.217228	0.0625078	-3.47521	0.000510449	0.00422368	1905.96	1652.88	1720.75	1500.01	1470.4	1561.06
ZAN	304.958	-0.417397	0.120117	-3.47494	0.000510972	0.00422507	394.905	336.049	314.569	231.212	298.971	254.042
CRTC3	1387.44	-0.204548	0.0588708	-3.47452	0.000511761	0.00422867	1450.1	1542.32	1464.68	1261.15	1298.13	1308.22
SMC4	3281.69	0.237002	0.0682183	3.47417	0.000512438	0.00423133	2603.07	3272.92	3155.63	3536.96	3711.02	3410.55
EFHD2	1163.25	-0.212099	0.0610829	-3.47232	0.000515981	0.0042547	1273.6	1250.06	1222.96	1085.36	1069.18	1078.32
CDKN1C	43.0749	-0.963959	0.277602	-3.47245	0.000515739	0.0042547	60.95	59.1096	51.8764	24.8409	26.674	34.9986
ZAP70	408.22	-0.338846	0.0975938	-3.47201	0.000516581	0.00425671	485.06	433.47	452.539	336.308	354.542	387.398
GUCY1A1	1055.53	0.222029	0.0639996	3.46922	0.000521968	0.00429814	949.804	992.822	981.236	1154.15	1108.08	1147.11
LOC112446824	2366.04	-0.175878	0.0507158	-3.46791	0.000524518	0.00431616	2441.81	2499.02	2591.61	2214.66	2177.26	2271.89
PPP4R3A	2272.44	0.183383	0.0528942	3.46698	0.000526349	0.00432824	2021.51	2164.07	2195.36	2370.4	2482.9	2400.42
WDR90	716.51	-0.306603	0.088457	-3.46613	0.000528016	0.00433896	910.44	769.52	699.779	614.335	649.067	655.922
LOC112442081	207.581	-0.438864	0.126623	-3.4659	0.000528463	0.00433965	234.911	252.858	228.477	171.976	182.272	174.993
YEATS4	329.076	0.377993	0.109068	3.46566	0.000528935	0.00434054	256.498	281.318	320.088	350.639	384.55	381.364
UPRT	816.487	0.263079	0.0759828	3.46235	0.000535483	0.00439126	685.687	749.816	789.183	943.955	861.348	868.931
CCDC194	69.8278	0.752728	0.217487	3.46102	0.000538128	0.00440991	46.9823	58.015	50.7726	87.8986	87.8019	87.4965
HOXB7	85.1523	-0.678472	0.196116	-3.45954	0.0005411	0.00443123	106.662	111.651	97.1302	68.7902	56.6822	69.9972
BRI3	1044.08	-0.258082	0.0746049	-3.45932	0.000541546	0.00443185	1254.55	1038.8	1117	964.974	985.826	903.326
LOC112442408	816.096	-2.19746	0.635275	-3.45907	0.000542043	0.00443288	1351.06	1327.78	1341.06	570.386	143.373	162.925
RBM25	2799.12	0.18725	0.0541547	3.45768	0.000544849	0.00444972	2424.03	2733.27	2690.95	2935.05	3063.06	2948.33
AEBP2	514.106	0.303816	0.0878665	3.45771	0.000544797	0.00444972	441.887	478.35	456.954	573.252	600.165	534.03
LOC107132911	55.1196	0.937246	0.271137	3.45672	0.000546798	0.00445551	43.1729	49.258	20.9713	79.2999	72.2421	65.7732
LOC112441894	53.1375	0.880546	0.254721	3.45691	0.000546407	0.00445551	36.8239	40.501	34.2163	69.7457	77.7991	59.739
C16H1orf74	174.684	-0.4909	0.142001	-3.45703	0.000546166	0.00445551	190.469	209.073	214.128	156.689	124.479	153.27
LMO4	688.574	-0.259891	0.075187	-3.45659	0.00054705	0.00445551	772.033	750.911	727.373	639.176	631.284	610.665
ALDH3A2	619.95	-0.272125	0.0787541	-3.45537	0.000549536	0.00446801	661.561	677.571	694.26	586.628	552.374	547.306
RNF11	291.306	0.405615	0.117393	3.45518	0.000549922	0.00446801	259.037	235.344	254.967	342.996	363.433	292.057
SBF1	1644.18	-0.221479	0.0641019	-3.4551	0.000550081	0.00446801	1912.31	1720.75	1678.81	1428.35	1591.55	1533.3
MTO1	122.193	0.603186	0.174559	3.45549	0.000549284	0.00446801	74.9177	107.273	107.064	148.09	160.044	135.77
TAF2	2010.67	0.183969	0.0532486	3.45491	0.000550474	0.00446815	1870.4	1859.76	1917.22	2056.06	2203.94	2156.64
UBA5	772.885	0.271369	0.078568	3.45394	0.000552451	0.00447897	628.547	712.599	757.174	824.527	876.907	837.553
BDP1	966.607	0.23713	0.0686559	3.45389	0.000552557	0.00447897	841.872	945.754	871.964	1060.52	1052.51	1027.03
TIGD5	428.42	-0.325826	0.094372	-3.45257	0.000555278	0.00449798	492.679	446.606	490.066	407.009	367.879	366.278
SLAIN2	553.893	0.305729	0.0885679	3.45192	0.000556616	0.00450576	454.585	500.242	532.009	642.042	565.711	628.768
CTBP1	1381.68	-0.216022	0.0626338	-3.44896	0.000562742	0.00455226	1588.51	1420.82	1450.33	1280.26	1235.89	1314.26
SERINC5	152.296	-0.518693	0.150402	-3.44871	0.000563274	0.00455348	161.263	202.505	173.289	129.937	126.701	120.081
ATP13A3	1241.47	0.227164	0.0658852	3.44787	0.000565024	0.00456454	1053.93	1164.68	1208.61	1331.86	1388.16	1301.59
GOPC	679.245	0.277989	0.080644	3.44711	0.000566621	0.00457435	599.341	642.543	597.13	707.966	808	720.488
DYNC1LI1	938.946	0.242327	0.070321	3.44602	0.000568912	0.00458974	792.35	875.698	910.596	1034.72	1011.39	1008.93
CALM1	16511.3	-0.13993	0.0406333	-3.44374	0.000573737	0.00462554	17351.7	17696.8	16884.1	16353.9	15383.1	15398.2
LRCH4	1216.58	-0.242045	0.0702962	-3.44321	0.000574851	0.00463139	1448.83	1245.68	1261.59	1058.61	1171.43	1113.32
PPP1CC	4776.5	0.153995	0.0447531	3.441	0.00057957	0.004664	4346.5	4625.87	4590.51	5157.36	4950.25	4988.51
VRK1	1782.97	0.2092	0.0607971	3.44095	0.000579679	0.004664	1544.07	1645.22	1772.63	1959.57	1832.73	1943.63
PDE4B	233.09	-0.437371	0.127169	-3.4393	0.000583229	0.0046894	243.8	269.277	288.079	204.46	216.726	176.2
PTPRE	789.292	-0.247305	0.0719238	-3.43844	0.000585087	0.00470117	858.379	881.171	830.022	696.501	747.983	721.695
LOC530973	447.405	-0.334992	0.0974692	-3.4369	0.000588404	0.00472464	538.391	479.445	476.821	382.168	440.121	367.485
AGO1	1353.8	-0.211547	0.0615626	-3.4363	0.000589724	0.00473206	1363.76	1475.55	1516.56	1283.13	1249.23	1234.61
LGALS1	4682.02	-0.16822	0.0489747	-3.43484	0.000592912	0.00475444	5194.72	4825.1	4849.89	4568.82	4196.71	4456.89
INSR	497.635	-0.31494	0.0917077	-3.43417	0.000594363	0.00476288	507.916	600.948	543.046	463.379	452.346	418.173
SEMA4D	195.603	-0.445357	0.129764	-3.43205	0.000599047	0.0047972	220.944	217.83	237.307	169.109	166.712	161.718
RXRA	240.44	-0.441314	0.128601	-3.43165	0.000599916	0.00479772	297.131	233.155	299.117	205.415	218.949	188.872
FGFR1OP2	378.518	0.341795	0.0995983	3.43173	0.000599738	0.00479772	307.289	329.481	363.135	426.117	432.341	412.742
DLAT	545.669	0.310771	0.090566	3.43143	0.000600412	0.00479848	432.999	536.365	488.962	632.488	605.722	577.477
SEC62	1011.91	0.236858	0.0690341	3.43103	0.000601292	0.00480229	871.077	992.822	919.426	1096.82	1128.09	1063.23
LOC782527	34.9618	1.10799	0.323051	3.42976	0.000604123	0.00482168	22.8562	25.1763	18.7638	57.3252	35.5653	50.0842
CCDC17	1320.42	-0.239545	0.0698528	-3.42928	0.000605182	0.0048269	1560.57	1310.26	1423.84	1157.01	1197	1273.83
GPR65	49.1748	0.901895	0.263112	3.4278	0.000608491	0.00485006	33.0146	33.9333	35.3201	62.1023	73.3535	57.3253
AASDH	514.295	0.30073	0.0877525	3.42702	0.000610246	0.0048608	454.585	458.647	466.887	545.545	614.613	545.495
HSPB1	3759.36	-0.201093	0.0586961	-3.426	0.00061255	0.0048759	4449.35	3883.72	3735.1	3470.09	3449.84	3568.05
CHD6	535.145	-0.298234	0.0870727	-3.42512	0.000614537	0.00488846	573.946	606.421	589.404	438.538	516.809	485.756
MIR2887-2	405.913	-2.70379	0.789449	-3.42491	0.000614993	0.00488883	599.341	847.238	664.459	227.39	64.4621	32.5849
TMX3	2134.36	0.189666	0.0554188	3.42242	0.000620667	0.00493065	1867.86	2072.12	2037.53	2272.94	2335.09	2220.6
DAXX	1355.67	0.215403	0.0629657	3.42096	0.000624002	0.00495385	1288.84	1176.72	1302.43	1456.06	1402.61	1507.35
SLC39A9	1663.89	0.199948	0.0584622	3.42013	0.000625906	0.00496566	1560.57	1477.74	1605.96	1850.65	1770.49	1717.95
KIRREL2	132.894	-0.538533	0.157495	-3.41937	0.000627655	0.00497623	151.105	165.288	156.733	99.3637	107.807	117.064
[truncated: 15,331 more rows]

## Sheet: Monocyte IFNG 2h vs UT
gene	baseMean	log2FoldChange	lfcSE	stat	pvalue	padj	monocyte_UT_R1	monocyte_UT_R2	monocyte_IFNG_2h_R1	monocyte_IFNG_2h_R2
[truncated: 20,576 more rows]

[truncated: 3 more sheets: Leukocyte IFNG 2h vs UT, Alveolar macrophage MB 24 vs UT, BMDM LPS vs UT]
