# Supplementary material for: Ruminant-specific retrotransposons shape regulatory evolution of bovine immunity
Source: HighWire-hosted journal article supplement (doi:10.1101/gr.276241.121), 2022-08-01
Supplement: Supplemental_Table_S2.xlsx [file Supplemental_Table_S2.xlsx]

## Sheet: Description
Supplemental Table S2
gProfiler gene ontology results for wild type RNA-seq upregulated genes
Results shown for all genes with FDR < 0.05 & log2FC > 0 (stimulated vs unstimulated)
To obtain GO results, gProfiler was run using an FDR < 0.05 cutoff
Sheets
MDBK ISGs GO	GO results for IFNG-stimulated genes in MDBK
BL3.1 ISGs GO	GO results for IFNG-stimulated genes in BL3.1
Monocyte ISGs GO	GO results for IFNG-stimulated genes in monocytes
Leukocyte ISGs GO	GO results for IFNG-stimulated genes in leukocytes
Alveolar macrophage MB-up GO	GO results for MB-stimulated genes in alveolar macropahges
BMDM LPS-up GO	GO results for LPS-stimulated genes in bone marrow derived macrophages

## Sheet: MDBK ISGs GO
source	term_name	term_id	adjusted_p_value	negative_log10_of_adjusted_p_value	term_size	query_size	intersection_size	effective_domain_size	intersections
GO:MF	protein binding	GO:0005515	3.00882e-32	31.5216	7423	1200	737	16724	IRF8,NLRC5,RNF19B,TAP1,CIITA,STAT3,PARP14,CSF1,TRIM25,FAM110C,TUBB3,IRF9,FST,FLRT2,IRF7,SOCS3,IFNAR2,ITGA2,DTX3L,GTF2B,ICOSLG,PARP9,TRIM21,TRIM16,MX1,ADAR,TRANK1,STAT1,TLR4,GCLC,THBS1,BCL3,RNF125,CDKN2AIP,CD74,ARHGEF5,IFIH1,LOC616254,STARD13,CNN3,FLNB,IFIT5,EIF2AK2,PDE3B,NMI,ATF3,LIMA1,RTP4,CD47,SAMHD1,SMAD1,LOC101905041,NAMPT,KIF2C,BOLA-DRA,MCL1,DAB2IP,IFIT2,TICAM2,NUB1,CASP8,FAS,TNFRSF1A,ITGA1,…
GO:MF	binding	GO:0005488	1.30185e-26	25.8854	12469	1200	1047	16724	IRF8,NLRC5,RNF19B,TAP1,CIITA,LOC512486,IRF1,ADAMTS1,LOC511531,STAT3,PARP14,CSF1,ZNFX1,TRIM25,FAM110C,STAT2,TUBB3,IRF9,FST,FLRT2,IRF7,SOCS3,IFNAR2,ITGA2,OAS1Y,DTX3L,RNF122,GTF2B,LOC507055,ICOSLG,PARP9,PLCH1,TEAD4,LAP3,TRIM21,TRIM16,MX1,ADAR,SLFN11,TRANK1,STAT1,TLR4,CYP24A1,PNKD,ISG20,GCLC,THBS1,UBA7,BCL3,PHLDA1,RNF125,ZC3HAV1,CDKN2AIP,CD74,ARHGEF5,IFIH1,LOC616254,STARD13,CNN3,ZBP1,FLNB,IFIT5,EIF2A…
GO:MF	enzyme binding	GO:0019899	1.51635e-17	16.8192	1514	1200	205	16724	RNF19B,STAT3,PARP14,IFNAR2,DTX3L,GTF2B,PARP9,TRIM21,STAT1,RNF125,CD74,PDE3B,SMAD1,DAB2IP,CASP8,FAS,ITGA1,ATP9A,RIPK1,GABARAPL1,GOLPH3,ZFP36,RHOBTB3,FBXO7,DUSP16,CLTC,DAXX,MAPRE3,NEDD9,MVP,TNS2,SPRED1,CEBPB,PML,PTPRJ,BCL2L14,TXNIP,SOCS1,TRIM34,STX1A,SMG6,GCLM,LTBR,ATP2B4,FAM83B,BFAR,BCOR,EPS8,IPO7,MIER1,RFFL,RANBP2,RND3,CSRNP2,KIF11,PTK2,LDLR,CFLAR,ABL1,RICTOR,EHHADH,ANKFY1,TRIM5,DUSP10,TBK1,TRIB2…
GO:MF	catalytic activity, acting on a protein	GO:0140096	1.25577e-13	12.9011	2215	1200	257	16724	RNF19B,ADAMTS1,PARP14,TRIM25,DTX3L,RNF122,GTF2B,PARP9,LAP3,TRIM21,UBA7,RNF125,HERC6,EIF2AK2,PDP1,VCPIP1,TGM2,PTPDC1,CASP8,BIRC3,EGLN3,USP18,RIPK1,SOSTDC1,DYRK2,PSMB10,PARP3,DUSP16,CDK17,PSMB9,PARP8,HERC5,ERAP2,HGF,BIRC2,TNS2,EPHB2,CASP7,LOC509283,PML,RNASEL,PTPRJ,C1RL,OTUD4,TRIM34,DESI1,FBXL14,CASP4,PSMB8,SENP2,MGAT3,PTPN13,TOP1,ERAP1,STK32A,PARP12,GLRX,RNF114,UBASH3B,NUP107,BFAR,JAK2,BCOR,MAST4,…
GO:MF	transferase activity	GO:0016740	5.51347e-10	9.25857	2144	1200	237	16724	RNF19B,PARP14,TRIM25,OAS1Y,DTX3L,RNF122,GTF2B,PARP9,TRIM21,ITPKC,RNF125,HERC6,ZC3HAV1,CMPK2,EIF2AK2,CGAS,NAMPT,TGM2,CHSY1,PNP,BIRC3,B4GALT5,RIPK1,UMPS,SOSTDC1,DYRK2,OAS2,PARP3,CDK17,CMTR2,PARP8,HERC5,HS6ST1,BIRC2,EPHB2,LOC509283,PML,RNASEL,PGS1,SAT1,OAS1X,OAT,IPPK,TRIM34,FBXL14,HS3ST1,SGMS1,MBOAT1,MGAT3,TOP1,STK32A,PARP12,RNF114,NUP107,BFAR,JAK2,BCOR,MAST4,RFFL,QTRT2,PRMT9,TWF1,ZDHHC23,PTK2,SPTLC…
GO:MF	kinase binding	GO:0019900	9.17199e-10	9.03754	553	1200	87	16724	STAT3,IFNAR2,TRIM21,PDE3B,SMAD1,DAB2IP,FAS,ZFP36,RHOBTB3,FBXO7,DUSP16,DAXX,MAPRE3,NEDD9,MVP,TNS2,SPRED1,CEBPB,PTPRJ,BCL2L14,SOCS1,TRIM34,STX1A,FAM83B,RFFL,RND3,KIF11,PTK2,ABL1,RICTOR,TRIM5,DUSP10,BCL10,HIF1A,TRIB1,ATP1B1,DUSP5,MAP2,BCAR3,SLC12A2,LYST,SPRY2,ITGB1,MAP2K6,CDK12,SPAG9,YWHAG,LOC616948,CYLD,IQGAP1,PJA2,GSK3B,AKAP7,NEK6,DOCK4,EGFR,USP37,RB1,MAVS,ITGAV,CRK,HDAC4,SPDYA,PRKAB2,BMPR2,MSN,NR…
GO:MF	purine nucleotide binding	GO:0017076	1.07615e-08	7.96813	1722	1200	195	16724	TAP1,CIITA,LOC512486,LOC511531,TUBB3,LOC507055,MX1,TRANK1,GCLC,UBA7,IFIH1,EIF2AK2,GBP4,ATP8B1,RRAS2,SAMHD1,ATAD1,TGM2,KIF2C,DDX58,ATP9A,RIPK1,RAB8B,DYRK2,RHOBTB3,OAS2,CDK17,RAB20,EPHB2,RNASEL,LOC618733,LOC781710,ARFRP1,IPPK,GBP5,ATP13A3,TOP1,ATP2B4,STK32A,NMUR2,MX2,RAB33B,MYO1E,LOC101903126,JAK2,MAST4,RND3,RAP2A,TWF1,KIF11,PTK2,ABL1,ATP2B1,RAB27A,TBK1,LRRK1,TRIB2,ABCC5,DDX3X,EARS2,TRIB1,STK40,RIP…
GO:MF	purine ribonucleoside triphosphate binding	GO:0035639	1.64591e-08	7.78359	1651	1200	188	16724	TAP1,CIITA,LOC512486,LOC511531,TUBB3,LOC507055,MX1,TRANK1,GCLC,UBA7,IFIH1,EIF2AK2,GBP4,ATP8B1,RRAS2,ATAD1,TGM2,KIF2C,DDX58,ATP9A,RIPK1,RAB8B,DYRK2,RHOBTB3,OAS2,CDK17,RAB20,EPHB2,RNASEL,LOC618733,LOC781710,ARFRP1,IPPK,GBP5,ATP13A3,TOP1,ATP2B4,STK32A,NMUR2,MX2,RAB33B,MYO1E,LOC101903126,JAK2,MAST4,RND3,RAP2A,TWF1,KIF11,PTK2,ABL1,ATP2B1,RAB27A,TBK1,LRRK1,TRIB2,ABCC5,DDX3X,EARS2,TRIB1,STK40,RIPK2,STK3…
GO:MF	ion binding	GO:0043167	2.2759e-08	7.64285	4548	1200	425	16724	RNF19B,TAP1,CIITA,LOC512486,ADAMTS1,LOC511531,ZNFX1,TRIM25,TUBB3,ITGA2,DTX3L,RNF122,GTF2B,LOC507055,PLCH1,LAP3,TRIM21,TRIM16,MX1,TRANK1,CYP24A1,PNKD,GCLC,THBS1,UBA7,RNF125,ZC3HAV1,IFIH1,EIF2AK2,PDE3B,NT5DC3,GBP4,ATP8B1,LIPH,LIMA1,PDP1,PPA1,RRAS2,SAMHD1,SMAD1,ATAD1,CGAS,TGM2,KIF2C,DDX58,AIFM2,ITGA1,ATP9A,BIRC3,EGLN3,SLC34A2,CDADC1,NT5E,SP110,TNFSF10,RIPK1,RAB8B,ADA,DYRK2,TRIM38,ZFP36,SOD2,RHOBTB3,…
GO:MF	protein kinase binding	GO:0019901	2.533e-08	7.59636	493	1200	77	16724	STAT3,IFNAR2,TRIM21,PDE3B,SMAD1,DAB2IP,ZFP36,RHOBTB3,FBXO7,DUSP16,DAXX,MAPRE3,NEDD9,MVP,SPRED1,PTPRJ,BCL2L14,SOCS1,TRIM34,FAM83B,RFFL,RND3,KIF11,PTK2,ABL1,RICTOR,TRIM5,DUSP10,BCL10,HIF1A,TRIB1,ATP1B1,DUSP5,MAP2,SLC12A2,LYST,SPRY2,ITGB1,MAP2K6,CDK12,SPAG9,YWHAG,LOC616948,CYLD,IQGAP1,PJA2,GSK3B,AKAP7,NEK6,DOCK4,USP37,MAVS,ITGAV,CRK,HDAC4,SPDYA,PRKAB2,BMPR2,MSN,NR3C1,APC,PTPN2,UFL1,BCAR1,BCL2L11,SPR…
GO:MF	ubiquitin-like protein transferase activity	GO:0019787	2.95585e-08	7.52932	394	1200	66	16724	RNF19B,TRIM25,DTX3L,RNF122,TRIM21,RNF125,HERC6,BIRC3,HERC5,BIRC2,LOC509283,PML,TRIM34,FBXL14,RNF114,BFAR,BCOR,RFFL,TRIM5,FBXO30,RBCK1,XIAP,UBR1,KCTD10,SH3RF2,ITCH,LOC785873,TRAF3IP2,LOC616948,PELI1,PIAS2,RNF31,UHRF2,KLHL21,PJA2,RNF141,TRIM36,NEURL3,PIAS1,JADE2,RC3H2,ANKIB1,EGR2,HECTD1,NEDD4L,TRIM24,RNF150,UFL1,HACE1,TNFAIP1,TNFAIP3,RNF217,BRCA1,SIAH1,UBE4A,RNF135,MIB1,LOC516599,KLHL9,MYCBP2,RABGE…
GO:MF	purine ribonucleotide binding	GO:0032555	3.93892e-08	7.40462	1702	1200	191	16724	TAP1,CIITA,LOC512486,LOC511531,TUBB3,LOC507055,MX1,TRANK1,GCLC,UBA7,IFIH1,EIF2AK2,GBP4,ATP8B1,RRAS2,ATAD1,TGM2,KIF2C,DDX58,ATP9A,RIPK1,RAB8B,DYRK2,RHOBTB3,OAS2,CDK17,RAB20,EPHB2,RNASEL,LOC618733,LOC781710,ARFRP1,IPPK,GBP5,ATP13A3,TOP1,ATP2B4,STK32A,NMUR2,MX2,RAB33B,MYO1E,LOC101903126,JAK2,MAST4,RND3,RAP2A,TWF1,KIF11,PTK2,ABL1,ATP2B1,RAB27A,TBK1,LRRK1,TRIB2,ABCC5,DDX3X,EARS2,TRIB1,STK40,RIPK2,MAP2…
GO:MF	ribonucleotide binding	GO:0032553	7.91502e-08	7.10155	1716	1200	191	16724	TAP1,CIITA,LOC512486,LOC511531,TUBB3,LOC507055,MX1,TRANK1,GCLC,UBA7,IFIH1,EIF2AK2,GBP4,ATP8B1,RRAS2,ATAD1,TGM2,KIF2C,DDX58,ATP9A,RIPK1,RAB8B,DYRK2,RHOBTB3,OAS2,CDK17,RAB20,EPHB2,RNASEL,LOC618733,LOC781710,ARFRP1,IPPK,GBP5,ATP13A3,TOP1,ATP2B4,STK32A,NMUR2,MX2,RAB33B,MYO1E,LOC101903126,JAK2,MAST4,RND3,RAP2A,TWF1,KIF11,PTK2,ABL1,ATP2B1,RAB27A,TBK1,LRRK1,TRIB2,ABCC5,DDX3X,EARS2,TRIB1,STK40,RIPK2,MAP2…
GO:MF	anion binding	GO:0043168	1.21373e-07	6.91588	2096	1200	223	16724	TAP1,CIITA,LOC512486,LOC511531,TUBB3,LOC507055,MX1,TRANK1,GCLC,UBA7,IFIH1,EIF2AK2,GBP4,ATP8B1,RRAS2,SAMHD1,ATAD1,CGAS,TGM2,KIF2C,DDX58,AIFM2,ATP9A,EGLN3,SLC34A2,RIPK1,RAB8B,DYRK2,RHOBTB3,OAS2,MTHFD2,CDK17,PPARD,SNX18,PLEKHA4,RAB20,PLEKHA1,EPHB2,RNASEL,LOC618733,LOC781710,ARFRP1,OAT,IPPK,ARAP2,GBP5,ATP13A3,TOP1,ATP2B4,STK32A,NMUR2,MX2,RAB33B,MYO1E,LOC101903126,JAK2,MAST4,RND3,RAP2A,TWF1,KIF11,PTK2…
GO:MF	ubiquitin-protein transferase activity	GO:0004842	2.16124e-07	6.6653	376	1200	62	16724	RNF19B,TRIM25,DTX3L,RNF122,TRIM21,RNF125,HERC6,BIRC3,HERC5,BIRC2,LOC509283,PML,TRIM34,FBXL14,RNF114,BFAR,BCOR,RFFL,TRIM5,FBXO30,RBCK1,XIAP,UBR1,KCTD10,SH3RF2,ITCH,LOC785873,TRAF3IP2,LOC616948,PELI1,RNF31,UHRF2,KLHL21,PJA2,RNF141,TRIM36,NEURL3,JADE2,RC3H2,ANKIB1,HECTD1,NEDD4L,TRIM24,RNF150,HACE1,TNFAIP1,TNFAIP3,RNF217,BRCA1,SIAH1,UBE4A,RNF135,MIB1,LOC516599,KLHL9,MYCBP2,RABGEF1,SMURF2,SMURF1,G2E3,…
GO:MF	adenyl nucleotide binding	GO:0030554	6.02351e-07	6.22015	1349	1200	155	16724	TAP1,CIITA,TRANK1,GCLC,UBA7,IFIH1,EIF2AK2,ATP8B1,ATAD1,KIF2C,DDX58,ATP9A,RIPK1,DYRK2,OAS2,CDK17,EPHB2,RNASEL,LOC618733,IPPK,ATP13A3,TOP1,ATP2B4,STK32A,MYO1E,JAK2,MAST4,TWF1,KIF11,PTK2,ABL1,ATP2B1,TBK1,LRRK1,TRIB2,ABCC5,DDX3X,EARS2,TRIB1,STK40,RIPK2,GRPEL2,MAP2,STK3,EIF2AK4,HSPA8,ATP2A2,ABCD4,ATP10A,PFKFB3,STRADB,MAP2K6,RPS6KC1,CENPE,CDK12,TTBK2,ABCE1,ROCK2,ATM,SGK3,RUNX2,KIF18A,DHX58,MASTL,GSK3B,…
GO:MF	catalytic activity	GO:0003824	6.6554e-07	6.17683	5455	1200	486	16724	RNF19B,LOC512486,ADAMTS1,LOC511531,PARP14,ZNFX1,TRIM25,TUBB3,OAS1Y,DTX3L,RNF122,GTF2B,LOC507055,PARP9,PLCH1,LAP3,TRIM21,MX1,ADAR,ITPKC,TRANK1,CYP24A1,PNKD,ISG20,GCLC,UBA7,RNF125,HERC6,ZC3HAV1,IFIH1,CMPK2,EIF2AK2,PDE3B,NT5DC3,GBP4,LIPH,PDP1,PPA1,VCPIP1,RRAS2,SAMHD1,CGAS,NAMPT,TGM2,KIF2C,CHSY1,PTPDC1,DDX58,AIFM2,CASP8,PNP,BIRC3,EGLN3,B4GALT5,CDADC1,NT5E,USP18,RIPK1,RAB8B,ADA,UMPS,SOSTDC1,DYRK2,PSMB…
GO:MF	ATP binding	GO:0005524	7.34938e-07	6.13375	1297	1200	150	16724	TAP1,CIITA,TRANK1,GCLC,UBA7,IFIH1,EIF2AK2,ATP8B1,ATAD1,KIF2C,DDX58,ATP9A,RIPK1,DYRK2,OAS2,CDK17,EPHB2,RNASEL,LOC618733,IPPK,ATP13A3,TOP1,ATP2B4,STK32A,MYO1E,JAK2,MAST4,TWF1,KIF11,PTK2,ABL1,ATP2B1,TBK1,LRRK1,TRIB2,ABCC5,DDX3X,EARS2,TRIB1,STK40,RIPK2,STK3,EIF2AK4,HSPA8,ATP2A2,ABCD4,ATP10A,PFKFB3,STRADB,MAP2K6,RPS6KC1,CENPE,CDK12,TTBK2,ABCE1,ROCK2,ATM,SGK3,RUNX2,KIF18A,DHX58,MASTL,GSK3B,MET,MAP4K5,P…
GO:MF	adenyl ribonucleotide binding	GO:0032559	1.09259e-06	5.96154	1338	1200	153	16724	TAP1,CIITA,TRANK1,GCLC,UBA7,IFIH1,EIF2AK2,ATP8B1,ATAD1,KIF2C,DDX58,ATP9A,RIPK1,DYRK2,OAS2,CDK17,EPHB2,RNASEL,LOC618733,IPPK,ATP13A3,TOP1,ATP2B4,STK32A,MYO1E,JAK2,MAST4,TWF1,KIF11,PTK2,ABL1,ATP2B1,TBK1,LRRK1,TRIB2,ABCC5,DDX3X,EARS2,TRIB1,STK40,RIPK2,MAP2,STK3,EIF2AK4,HSPA8,ATP2A2,ABCD4,ATP10A,PFKFB3,STRADB,MAP2K6,RPS6KC1,CENPE,CDK12,TTBK2,ABCE1,ROCK2,ATM,SGK3,RUNX2,KIF18A,DHX58,MASTL,GSK3B,MET,MAP…
GO:MF	nucleotide binding	GO:0000166	1.20607e-06	5.91863	1949	1200	206	16724	TAP1,CIITA,LOC512486,LOC511531,TUBB3,LOC507055,MX1,TRANK1,GCLC,UBA7,IFIH1,EIF2AK2,GBP4,ATP8B1,RRAS2,SAMHD1,ATAD1,TGM2,KIF2C,DDX58,AIFM2,ATP9A,NT5E,RIPK1,RAB8B,DYRK2,RHOBTB3,OAS2,ACSL5,CDK17,RAB20,EPHB2,RNASEL,LOC618733,LOC781710,ZBTB38,ARFRP1,IPPK,GBP5,ATP13A3,TOP1,ATP2B4,STK32A,NMUR2,MX2,RAB33B,MYO1E,LOC101903126,JAK2,MAST4,RND3,RAP2A,TWF1,KIF11,PTK2,ABL1,ATP2B1,EHHADH,RAB27A,ACSL4,TBK1,LRRK1,TR…
GO:MF	nucleoside phosphate binding	GO:1901265	1.20607e-06	5.91863	1949	1200	206	16724	TAP1,CIITA,LOC512486,LOC511531,TUBB3,LOC507055,MX1,TRANK1,GCLC,UBA7,IFIH1,EIF2AK2,GBP4,ATP8B1,RRAS2,SAMHD1,ATAD1,TGM2,KIF2C,DDX58,AIFM2,ATP9A,NT5E,RIPK1,RAB8B,DYRK2,RHOBTB3,OAS2,ACSL5,CDK17,RAB20,EPHB2,RNASEL,LOC618733,LOC781710,ZBTB38,ARFRP1,IPPK,GBP5,ATP13A3,TOP1,ATP2B4,STK32A,NMUR2,MX2,RAB33B,MYO1E,LOC101903126,JAK2,MAST4,RND3,RAP2A,TWF1,KIF11,PTK2,ABL1,ATP2B1,EHHADH,RAB27A,ACSL4,TBK1,LRRK1,TR…
GO:MF	carbohydrate derivative binding	GO:0097367	1.2723e-06	5.89541	1962	1200	207	16724	TAP1,CIITA,LOC512486,ADAMTS1,LOC511531,TUBB3,LOC507055,MX1,TRANK1,TLR4,GCLC,THBS1,UBA7,IFIH1,EIF2AK2,GBP4,ATP8B1,LIPH,RRAS2,SAMHD1,ATAD1,TGM2,KIF2C,DDX58,ATP9A,RIPK1,RAB8B,DYRK2,RHOBTB3,OAS2,CDK17,RAB20,EPHB2,RNASEL,LOC618733,LOC781710,ARFRP1,IPPK,GBP5,ATP13A3,TOP1,ATP2B4,STK32A,NMUR2,MX2,RAB33B,MYO1E,LOC101903126,JAK2,MAST4,SDCBP,RND3,RAP2A,TWF1,KIF11,PTK2,ABL1,ATP2B1,RAB27A,TBK1,CTSS,LRRK1,TRIB…
GO:MF	identical protein binding	GO:0042802	2.99433e-06	5.5237	1437	1200	160	16724	STAT3,CSF1,TRIM21,MX1,STAT1,TLR4,IFIH1,FLNB,EIF2AK2,NMI,ATF3,SAMHD1,SMAD1,NAMPT,MCL1,DAB2IP,CASP8,FAS,CLDN1,CDADC1,TNFSF10,SDC4,RIPK1,ARID5A,IFIT3,INHBA,HGF,MAPRE3,PSME2,MVP,TNS2,EPHB2,CEBPB,PML,LOC781710,ZBTB38,CYBRD1,SAT1,OAT,E2F8,GBP5,TRIM34,DESI1,STX1A,ARL6IP1,TMCC3,SNX16,LTBR,IL6ST,TRIP10,UBASH3B,AMOTL1,CD2AP,XRN2,SLC4A4,QTRT2,FOXJ2,LDLR,KCTD6,SAV1,TRIM5,SDC1,RBCK1,TBK1,XIAP,STARD3,LRRK1,KCT…
GO:MF	transferase activity, transferring phosphorus-containing groups	GO:0016772	7.54369e-06	5.12242	879	1200	108	16724	OAS1Y,ITPKC,CMPK2,EIF2AK2,CGAS,RIPK1,SOSTDC1,DYRK2,OAS2,CDK17,EPHB2,RNASEL,PGS1,OAS1X,IPPK,SGMS1,TOP1,STK32A,NUP107,JAK2,MAST4,TWF1,PTK2,POLR2K,ABL1,PRKAB1,ADPGK,TBK1,LRRK1,TRIB2,NRP2,TRIB1,STK40,RIPK2,POLI,PNPT1,STK3,EIF2AK4,PFKFB3,STRADB,POLB,MAP2K6,RPS6KC1,CDK12,GNPTAB,TTBK2,ROCK2,ATM,SGK3,MASTL,GSK3B,MET,MAP4K5,PRKCI,NOL9,PIK3C2A,NEK6,POLH,PDK4,HK2,PRKAA2,LRRK2,SLK,NLK,EGFR,TEP1,RNGTT,PIK3CA,…
GO:MF	ubiquitin-like protein ligase activity	GO:0061659	1.2238e-05	4.91229	278	1200	47	16724	RNF19B,TRIM25,DTX3L,RNF122,TRIM21,RNF125,BIRC3,HERC5,BIRC2,TRIM34,RNF114,BFAR,RFFL,TRIM5,FBXO30,XIAP,UBR1,SH3RF2,ITCH,LOC785873,TRAF3IP2,LOC616948,PELI1,PIAS2,UHRF2,NEURL3,PIAS1,JADE2,RC3H2,ANKIB1,EGR2,HECTD1,NEDD4L,TRIM24,RNF150,UFL1,RNF217,SIAH1,UBE4A,RNF135,LOC516599,MYCBP2,RABGEF1,SMURF2,SMURF1,NEDD4,BRAP
GO:MF	enzyme activator activity	GO:0008047	1.58906e-05	4.79886	547	1200	75	16724	SMAP2,DTX3L,ARHGEF5,STARD13,DOCK9,DAB2IP,STARD8,RGS16,ARHGAP28,PLEKHG1,DAXX,DENND2D,ARAP2,AZIN1,CFLAR,RICTOR,DOCK8,BCL10,USP6NL,DDX3X,ATP1B1,ARHGAP24,DENND5A,BCAR3,GNAQ,SPRY2,SRGAP1,SIPA1L3,C8H9ORF72,IQGAP1,NRG1,TBC1D9,DENND4C,ABI1,ECT2,PSME1,ASAP1,DOCK4,GAPVD1,MYO9A,LRRK2,RALGPS2,DOCK7,ARFGEF1,NCAPH,GPRC5A,PSME4,CCNT2,EVI5,PIK3CA,SMAP1,RALGAPB,SPDYA,TOR1AIP2,CAB39,RIC8B,FNIP1,AKAP13,RASA1,ARHGEF…
GO:MF	protein ADP-ribosylase activity	GO:1990404	6.76156e-05	4.16995	15	1200	9	16724	PARP14,PARP9,PARP3,PARP8,PARP12,PARP10,TNKS,TNKS2,TIPARP
GO:MF	small molecule binding	GO:0036094	8.02664e-05	4.09547	2212	1200	219	16724	TAP1,CIITA,LOC512486,LOC511531,TUBB3,LOC507055,MX1,TRANK1,GCLC,UBA7,IFIH1,EIF2AK2,GBP4,ATP8B1,RRAS2,SAMHD1,ATAD1,TGM2,KIF2C,DDX58,AIFM2,ATP9A,EGLN3,NT5E,RIPK1,RAB8B,DYRK2,RHOBTB3,OAS2,ACSL5,CDK17,PPARD,RAB20,EPHB2,RNASEL,LOC618733,LOC781710,ZBTB38,ARFRP1,OAT,IPPK,OSBPL3,GBP5,ATP13A3,TOP1,ATP2B4,STK32A,NMUR2,MX2,RAB33B,MYO1E,LOC101903126,JAK2,MAST4,GRAMD1C,RND3,RAP2A,TWF1,KIF11,PTK2,SPTLC2,ABL1,AT…
GO:MF	phosphotransferase activity, alcohol group as acceptor	GO:0016773	8.45183e-05	4.07305	663	1200	84	16724	ITPKC,EIF2AK2,RIPK1,SOSTDC1,DYRK2,CDK17,EPHB2,RNASEL,IPPK,TOP1,STK32A,NUP107,JAK2,MAST4,TWF1,PTK2,ABL1,PRKAB1,ADPGK,TBK1,LRRK1,TRIB2,NRP2,TRIB1,STK40,RIPK2,STK3,EIF2AK4,PFKFB3,STRADB,MAP2K6,RPS6KC1,CDK12,TTBK2,ROCK2,ATM,SGK3,MASTL,GSK3B,MET,MAP4K5,PRKCI,NOL9,PIK3C2A,NEK6,PDK4,HK2,PRKAA2,LRRK2,SLK,NLK,EGFR,PIK3CA,CDK8,IRAK4,SMG1,PRKAB2,PKN2,BMPR2,TRIM24,STK38L,SRPK1,HIPK3,AKAP13,PXK,ATR,MAP4K4,PRK…
GO:MF	signaling adaptor activity	GO:0035591	0.000158892	3.7989	46	1200	15	16724	DAB2IP,EPS8,SAV1,IRS1,SPAG9,IQGAP1,ABI1,HOMER2,CDC42SE2,MAVS,CRK,AKAP13,PTPN11,AFAP1L2,SOCS2
GO:MF	protein kinase activity	GO:0004672	0.000181691	3.74067	560	1200	73	16724	EIF2AK2,RIPK1,SOSTDC1,DYRK2,CDK17,EPHB2,RNASEL,TOP1,STK32A,NUP107,JAK2,MAST4,TWF1,PTK2,ABL1,PRKAB1,TBK1,LRRK1,TRIB2,NRP2,TRIB1,STK40,RIPK2,STK3,EIF2AK4,STRADB,MAP2K6,RPS6KC1,CDK12,TTBK2,ROCK2,ATM,SGK3,MASTL,GSK3B,MET,MAP4K5,PRKCI,NEK6,PDK4,PRKAA2,LRRK2,SLK,NLK,EGFR,CDK8,IRAK4,SMG1,PRKAB2,PKN2,BMPR2,TRIM24,STK38L,SRPK1,HIPK3,AKAP13,PXK,ATR,MAP4K4,PRKD3,BMPR1B,RPS6KA3,SGK1,UHMK1,TRPM7,MAP3K13,LMTK2…
GO:MF	protein serine/threonine kinase activity	GO:0004674	0.000258051	3.58829	374	1200	54	16724	EIF2AK2,RIPK1,SOSTDC1,DYRK2,TOP1,STK32A,NUP107,MAST4,TBK1,LRRK1,RIPK2,STK3,EIF2AK4,MAP2K6,RPS6KC1,CDK12,TTBK2,ROCK2,ATM,SGK3,MASTL,GSK3B,MAP4K5,PRKCI,NEK6,PRKAA2,LRRK2,SLK,NLK,CDK8,IRAK4,SMG1,PRKAB2,PKN2,BMPR2,STK38L,SRPK1,HIPK3,AKAP13,ATR,MAP4K4,PRKD3,BMPR1B,RPS6KA3,SGK1,UHMK1,TRPM7,MAP3K13,LMTK2,CSNK1G1,CDK13,CSNK1G3,TAOK1,IKBKB
GO:MF	ubiquitin protein ligase activity	GO:0061630	0.000258324	3.58783	270	1200	43	16724	RNF19B,TRIM25,DTX3L,RNF122,TRIM21,RNF125,BIRC3,HERC5,BIRC2,TRIM34,RNF114,BFAR,RFFL,TRIM5,FBXO30,XIAP,UBR1,SH3RF2,ITCH,LOC785873,TRAF3IP2,LOC616948,PELI1,UHRF2,NEURL3,JADE2,RC3H2,ANKIB1,HECTD1,NEDD4L,TRIM24,RNF150,RNF217,SIAH1,UBE4A,RNF135,LOC516599,MYCBP2,RABGEF1,SMURF2,SMURF1,NEDD4,BRAP
GO:MF	nucleoside-triphosphatase regulator activity	GO:0060589	0.000275777	3.55944	414	1200	58	16724	SMAP2,ARHGEF5,STARD13,DOCK9,DAB2IP,STARD8,RGS16,ARHGAP28,PLEKHG1,DENND2D,ARAP2,DOCK8,USP6NL,ATP1B1,ARHGAP24,DENND5A,GRPEL2,BCAR3,GNAQ,SRGAP1,SIPA1L3,C8H9ORF72,IQGAP1,TBC1D9,DENND4C,EIF5,ECT2,ASAP1,DOCK4,GAPVD1,MYO9A,LRRK2,RALGPS2,DOCK7,ARFGEF1,NCAPH,GPSM2,EVI5,SMAP1,RALGAPB,TOR1AIP2,RIC8B,FNIP1,AKAP13,BAG3,RASA1,ARHGEF12,PLEKHG6,DENND1B,ARHGAP17,FGD3,SBF2,MYCBP2,ARHGAP9,DENND6A,DENND3,DENND4A,CHM
GO:MF	organic cyclic compound binding	GO:0097159	0.000279975	3.55288	5209	1200	450	16724	IRF8,NLRC5,TAP1,CIITA,LOC512486,IRF1,LOC511531,STAT3,PARP14,ZNFX1,STAT2,TUBB3,IRF9,IRF7,OAS1Y,GTF2B,LOC507055,TEAD4,TRIM21,TRIM16,MX1,ADAR,SLFN11,TRANK1,STAT1,CYP24A1,ISG20,GCLC,UBA7,CDKN2AIP,IFIH1,ZBP1,IFIT5,EIF2AK2,GBP4,ATP8B1,ATF3,ARID5B,IFI16,RRAS2,SAMHD1,MAFF,SMAD1,ATAD1,CGAS,TGM2,KIF2C,IFIT2,DDX58,AIFM2,ATP9A,LOC100139670,NT5E,SP110,CARHSP1,RIPK1,RAB8B,KLF6,DYRK2,ZFP36,RHOBTB3,OAS2,BACH1,AC…
GO:MF	ATPase	GO:0016887	0.000299091	3.5242	526	1200	69	16724	TAP1,ZNFX1,IFIH1,ATP8B1,ATAD1,KIF2C,DDX58,ATP9A,RHOBTB3,ACSL5,LOC509283,LOC618733,ATP13A3,ATP2B4,MYO1E,KIF11,ATP2B1,ACSL4,ABCC5,NAV2,DDX3X,HSPA8,ATP2A2,ABCD4,ATP10A,CENPE,ABCE1,MOV10,KIF18A,TMEM30B,DHX58,ABCC3,ATP7A,HLTF,MYH10,CHD1,YTHDC2,KIF27,BPTF,MYO5A,INO80,ATP11B,SETX,BTAF1,KIF23,TMEM30A,DDX21,ABCB1,ATAD5,DYNC1H1,ABCA5,FBH1,KIF2A,DHX9,STARD9,ATP6V1C1,LOC520016,KIF5C,SMARCA5,ATAD2,AQR,KIF3B,A…
GO:MF	kinase activity	GO:0016301	0.000305328	3.51523	737	1200	89	16724	ITPKC,CMPK2,EIF2AK2,RIPK1,SOSTDC1,DYRK2,CDK17,EPHB2,RNASEL,IPPK,TOP1,STK32A,NUP107,JAK2,MAST4,TWF1,PTK2,ABL1,PRKAB1,ADPGK,TBK1,LRRK1,TRIB2,NRP2,TRIB1,STK40,RIPK2,STK3,EIF2AK4,PFKFB3,STRADB,MAP2K6,RPS6KC1,CDK12,TTBK2,ROCK2,ATM,SGK3,MASTL,GSK3B,MET,MAP4K5,PRKCI,NOL9,PIK3C2A,NEK6,PDK4,HK2,PRKAA2,LRRK2,SLK,NLK,EGFR,PIK3CA,CDK8,IRAK4,SMG1,PRKAB2,PKN2,BMPR2,MOB1A,TRIM24,STK38L,SRPK1,HIPK3,AKAP13,PXK,AT…
GO:MF	heterocyclic compound binding	GO:1901363	0.000343695	3.46383	5138	1200	444	16724	IRF8,NLRC5,TAP1,CIITA,LOC512486,IRF1,LOC511531,STAT3,PARP14,ZNFX1,STAT2,TUBB3,IRF9,IRF7,OAS1Y,GTF2B,LOC507055,TEAD4,TRIM21,TRIM16,MX1,ADAR,SLFN11,TRANK1,STAT1,CYP24A1,ISG20,GCLC,UBA7,CDKN2AIP,IFIH1,ZBP1,IFIT5,EIF2AK2,GBP4,ATP8B1,ATF3,ARID5B,IFI16,RRAS2,SAMHD1,MAFF,SMAD1,ATAD1,CGAS,TGM2,KIF2C,IFIT2,DDX58,AIFM2,ATP9A,LOC100139670,NT5E,SP110,CARHSP1,RIPK1,RAB8B,KLF6,DYRK2,ZFP36,RHOBTB3,OAS2,BACH1,AC…
GO:MF	zinc ion binding	GO:0008270	0.000419582	3.37718	678	1200	83	16724	ADAMTS1,ZNFX1,GTF2B,TRIM21,TRIM16,RNF125,IFIH1,SAMHD1,DDX58,CDADC1,TNFSF10,ADA,TRIM38,PPARD,ERAP2,PML,TRIM14,TRIM34,PRICKLE3,HNF4G,ERAP1,CLIP1,PEG10,MORC3,POLR2K,SEC24B,TRIM5,FBXO30,UBR1,KDM2A,EARS2,MMP25,PHC2,MMP1,ZFAND5,LNPEP,LOC785873,USP33,NAPEPLD,TNKS,LOC616948,CYLD,PIAS2,RNF31,DHX58,TRIM36,PIAS1,HLTF,CA4,BPTF,ZMYM1,ZMYM5,TRIM44,ZCCHC8,DNPEP,HDAC4,ZDHHC20,TRIM24,NR3C1,LOC112441463,ERI2,CPD,D…
GO:MF	phosphatidylinositol binding	GO:0035091	0.000454168	3.34278	221	1200	37	16724	PHLDA1,CGAS,DAB2IP,GOLPH3,SNX18,PLEKHA4,ARAP2,SNX16,MYO1E,TWF1,ANKFY1,AIDA,RPS6KC1,SCIN,ING2,SGK3,SVIL,IQGAP1,VPS36,GSDMD,PIK3C2A,TULP3,PLEKHF2,MITD1,SNX4,OGT,PARD3,PXK,SNX10,SH3PXD2A,AMER1,DENND1B,SGK1,SBF2,TTPAL,ARHGAP9,OSBPL8
GO:MF	double-stranded RNA binding	GO:0003725	0.000470255	3.32767	69	1200	18	16724	OAS1Y,ADAR,IFIH1,EIF2AK2,DDX58,OAS2,CLTC,OAS1X,MRPL44,YRDC,DDX3X,DHX58,RC3H2,DDX21,MSN,MBNL1,FMR1,DHX9
GO:MF	ubiquitin-like protein-specific protease activity	GO:0019783	0.000744569	3.1281	100	1200	22	16724	VCPIP1,USP18,OTUD4,DESI1,SENP2,ZUP1,USP9X,USP33,USP15,CYLD,USP42,USP34,USP32,USP37,USP31,SENP5,USP53,USP25,LOC782101,TNFAIP3,USP24,OTUB2
GO:MF	GTPase regulator activity	GO:0030695	0.000951322	3.02167	380	1200	53	16724	SMAP2,ARHGEF5,STARD13,DOCK9,DAB2IP,STARD8,RGS16,ARHGAP28,PLEKHG1,DENND2D,ARAP2,DOCK8,USP6NL,ARHGAP24,DENND5A,BCAR3,GNAQ,SRGAP1,SIPA1L3,C8H9ORF72,IQGAP1,TBC1D9,DENND4C,EIF5,ECT2,ASAP1,DOCK4,GAPVD1,MYO9A,LRRK2,RALGPS2,DOCK7,ARFGEF1,GPSM2,EVI5,SMAP1,RALGAPB,RIC8B,FNIP1,AKAP13,RASA1,ARHGEF12,PLEKHG6,DENND1B,ARHGAP17,FGD3,SBF2,MYCBP2,ARHGAP9,DENND6A,DENND3,DENND4A,CHM
GO:MF	GTPase activator activity	GO:0005096	0.00151088	2.82077	366	1200	51	16724	SMAP2,ARHGEF5,STARD13,DOCK9,DAB2IP,STARD8,RGS16,ARHGAP28,PLEKHG1,DENND2D,ARAP2,DOCK8,USP6NL,ARHGAP24,DENND5A,BCAR3,GNAQ,SRGAP1,SIPA1L3,C8H9ORF72,IQGAP1,TBC1D9,DENND4C,ECT2,ASAP1,DOCK4,GAPVD1,MYO9A,LRRK2,RALGPS2,DOCK7,ARFGEF1,EVI5,SMAP1,RALGAPB,RIC8B,FNIP1,AKAP13,RASA1,ARHGEF12,PLEKHG6,DENND1B,ARHGAP17,FGD3,SBF2,MYCBP2,ARHGAP9,DENND6A,DENND3,DENND4A,CHM
GO:MF	pentosyltransferase activity	GO:0016763	0.00170007	2.76953	61	1200	16	16724	PARP14,PARP9,ZC3HAV1,NAMPT,PNP,UMPS,PARP3,PARP8,PARP12,QTRT2,PARP10,TNKS,TNKS2,TIPARP,HPRT1,GXYLT1
GO:MF	ubiquitin-like protein ligase binding	GO:0044389	0.00178533	2.74828	243	1200	38	16724	DTX3L,PARP9,STAT1,CASP8,RIPK1,GABARAPL1,FBXO7,DAXX,CEBPB,PML,TXNIP,LTBR,RFFL,TRIB2,BCL10,MC1R,HIF1A,TRIB1,HSPA8,ITCH,UBXN7,PIAS2,GSK3B,PIAS1,HLTF,NEK6,NLK,EGFR,RB1,EGR2,CRK,APC,USP25,BLZF1,BRCA1,LRPPRC,TMBIM6,SMC6
GO:MF	cytoskeletal protein binding	GO:0008092	0.0029858	2.52494	801	1200	91	16724	FAM110C,CNN3,FLNB,LIMA1,KIF2C,KIRREL1,MAPRE3,DIXDC1,LARP6,CLIP1,MX2,MYO1E,FHDC1,EPS8,TWF1,KIF11,PTK2,KCTD6,ABL1,TRAK2,DDX3X,PROM1,AIF1L,MAP2,POLB,ITGB1,CENPE,SPAG9,SCIN,TTBK2,SVIL,IQGAP1,KIF18A,GSK3B,GJA1,TRIM36,TMOD3,HOOK3,CEP350,SBDS,HAUS6,HOMER2,NEK6,MYH10,RMDN3,ANLN,DLGAP5,KIF27,MYO9A,LRRK2,EML4,ARFGEF1,MYO5A,INO80,TMOD2,EGFR,KIF23,FMNL3,MSN,APC,WASL,CDH1,SORBS3,PXK,KIF2A,PDE4B,BCL2L11,MISP,S…
GO:MF	GTPase binding	GO:0051020	0.00388066	2.41109	223	1200	35	16724	RHOBTB3,EPS8,IPO7,RANBP2,ANKFY1,USP6NL,DENND5A,RIMS3,USP33,ROCK2,C8H9ORF72,IQGAP1,ECT2,EXOC5,NCKAP1,DOCK4,LRRK2,DOCK7,GOLGA4,RASIP1,PKN2,FMNL3,AKAP13,HACE1,TNFAIP1,RASA1,DIAPH3,DENND1B,DIAPH2,PARD6A,AIMP1,KIF3B,MYCBP2,KPNB1,CHM
GO:MF	importin-alpha family protein binding	GO:0061676	0.00436448	2.36007	6	1200	5	16724	CDADC1,DESI1,RB1,DHX9,KPNB1
GO:MF	metal ion binding	GO:0046872	0.00586127	2.23201	2787	1200	254	16724	RNF19B,ADAMTS1,ZNFX1,TRIM25,ITGA2,DTX3L,RNF122,GTF2B,PLCH1,LAP3,TRIM21,TRIM16,CYP24A1,PNKD,GCLC,THBS1,RNF125,ZC3HAV1,IFIH1,PDE3B,NT5DC3,ATP8B1,LIPH,LIMA1,PDP1,PPA1,SAMHD1,SMAD1,TGM2,DDX58,ITGA1,ATP9A,BIRC3,EGLN3,SLC34A2,CDADC1,NT5E,SP110,TNFSF10,ADA,DYRK2,TRIM38,ZFP36,SOD2,ANXA10,MTHFD2,PPARD,PCGF5,ERAP2,LRP8,BIRC2,ZFP36L1,LOC509283,ZGPAT,PML,TRIM14,CYBRD1,TRIM34,PRICKLE3,EXO1,HNF4G,ATP13A3,ERAP1…
GO:MF	small GTPase binding	GO:0031267	0.00619679	2.20783	200	1200	32	16724	RHOBTB3,EPS8,IPO7,RANBP2,ANKFY1,USP6NL,DENND5A,RIMS3,USP33,ROCK2,C8H9ORF72,IQGAP1,ECT2,EXOC5,NCKAP1,DOCK4,LRRK2,DOCK7,GOLGA4,PKN2,FMNL3,AKAP13,HACE1,TNFAIP1,DIAPH3,DENND1B,DIAPH2,PARD6A,KIF3B,MYCBP2,KPNB1,CHM
GO:MF	kinase activator activity	GO:0019209	0.00636721	2.19605	60	1200	15	16724	DAXX,RICTOR,BCL10,DDX3X,SPRY2,IQGAP1,NRG1,ABI1,GPRC5A,CCNT2,PIK3CA,SPDYA,CAB39,AFAP1L2,DBF4
GO:MF	cell adhesion molecule binding	GO:0050839	0.00744436	2.12817	211	1200	33	16724	ITGA2,THBS1,LOC616254,CD47,ITGA1,KIRREL1,PVR,SPP1,SEMA7A,PTPRJ,LGALS8,ISG15,PTK2,PROM1,ADAM9,ITGB8,NECTIN2,LOC100140873,ITGB1,ESM1,PALLD,TJP1,TCAM1,CDH17,TJP2,ITGAV,BMPR2,MSN,CDH1,PTPN2,PTPN11,NECTIN3,UTRN
GO:MF	cysteine-type peptidase activity	GO:0008234	0.00772702	2.11199	166	1200	28	16724	VCPIP1,CASP8,USP18,CASP7,OTUD4,DESI1,CASP4,SENP2,ZUP1,CFLAR,CTSS,USP9X,USP33,USP15,CYLD,USP42,USP34,USP32,USP37,USP31,SENP5,USP53,USP25,LOC782101,TNFAIP3,USP24,OTUB2,LGMN
GO:MF	transcription factor binding	GO:0008134	0.00886895	2.05213	400	1200	52	16724	STAT3,DTX3L,GTF2B,BCL3,GABARAPL1,ARID5A,PPARD,DAXX,KLF4,PPRC1,BCOR,GTF2H1,PPP1R13B,E2F2,TRIB2,BCL10,DDX3X,HIF1A,TRIB1,ASXL1,HDAC1,KLF5,KDM3A,UBXN7,PIAS2,RUNX2,GSK3B,NRIP1,BDP1,DR1,PIAS1,NEK6,MED13,BPTF,CCNT2,NLK,RB1,HDAC4,YAP1,TRIM24,SORBS3,PTPN2,TMF1,ZBTB49,KAT2B,UBA2,SP1,CNOT7,APBB2,CGGBP1,MED1,RORA
GO:MF	protein kinase activator activity	GO:0030295	0.00976378	2.01038	55	1200	14	16724	DAXX,RICTOR,DDX3X,SPRY2,IQGAP1,NRG1,ABI1,GPRC5A,CCNT2,PIK3CA,SPDYA,CAB39,AFAP1L2,DBF4
GO:MF	intramembrane lipid transporter activity	GO:0140303	0.0114588	1.94086	36	1200	11	16724	ATP8B1,ATP9A,PLSCR2,ANO6,ATP10A,TMEM30B,PLSCR4,ATP11B,TMEM30A,ABCB1,ABCA3
GO:MF	lipid binding	GO:0008289	0.0133182	1.87555	620	1200	72	16724	TLR4,THBS1,PHLDA1,STARD13,ATP8B1,APOL3,CGAS,DAB2IP,TICAM2,STARD8,LOC518495,LOC515697,GOLPH3,SYT7,ANXA10,LOC788334,PPARD,SNX18,PLEKHA4,OSBPL3,ARAP2,SNX16,CPNE8,MYO1E,FITM2,GRAMD1C,TWF1,ANKFY1,AIDA,STARD3,PROM1,FYB1,HSPA8,RPS6KC1,SCIN,MYOF,ING2,SGK3,SVIL,FFAR4,IQGAP1,VPS36,RTN4R,PRKCI,GSDMD,PIK3C2A,TULP3,ANXA1,PLEKHF2,MITD1,SNX4,OGT,SCP2,CD14,SH3GLB1,NR3C1,PARD3,PCYT1A,PXK,SNX10,SCARB2,SH3PXD2A,STA…
GO:MF	hydrolase activity, acting on acid anhydrides, in phosphorus-containing anhydrides	GO:0016818	0.0142243	1.84697	470	1200	58	16724	LOC512486,LOC511531,TUBB3,LOC507055,MX1,GBP4,PPA1,RRAS2,KIF2C,RAB8B,RHOBTB3,RAB20,LOC781710,GBP5,MX2,RAB33B,MYO1E,FITM2,RND3,RAP2A,KIF11,RAB27A,DDX3X,LOC100141266,GNAQ,NUDT4,GEM,RAB31,CENPE,RAB30,NUDT7,KIF18A,LOC513659,HLTF,MYH10,KIF27,MYO9A,LRRK2,NRAS,GTPBP1,MYO5A,KIF23,RNGTT,CRACR2A,DYNC1H1,TUBA1C,KIF2A,ATL2,DHX9,LOC112443216,STARD9,RAB4B,KIF5C,SMARCA5,KIF3B,GMPS,TBCC,BLM
GO:MF	hydrolase activity, acting on acid anhydrides	GO:0016817	0.0142243	1.84697	470	1200	58	16724	LOC512486,LOC511531,TUBB3,LOC507055,MX1,GBP4,PPA1,RRAS2,KIF2C,RAB8B,RHOBTB3,RAB20,LOC781710,GBP5,MX2,RAB33B,MYO1E,FITM2,RND3,RAP2A,KIF11,RAB27A,DDX3X,LOC100141266,GNAQ,NUDT4,GEM,RAB31,CENPE,RAB30,NUDT7,KIF18A,LOC513659,HLTF,MYH10,KIF27,MYO9A,LRRK2,NRAS,GTPBP1,MYO5A,KIF23,RNGTT,CRACR2A,DYNC1H1,TUBA1C,KIF2A,ATL2,DHX9,LOC112443216,STARD9,RAB4B,KIF5C,SMARCA5,KIF3B,GMPS,TBCC,BLM
GO:MF	RNA stem-loop binding	GO:0035613	0.0151981	1.81821	15	1200	7	16724	ARID5A,LARP6,DDX3X,MYH10,RC3H2,FMR1,DHX9
GO:MF	NAD+ ADP-ribosyltransferase activity	GO:0003950	0.0157048	1.80397	31	1200	10	16724	PARP14,PARP9,ZC3HAV1,PARP3,PARP8,PARP12,PARP10,TNKS,TNKS2,TIPARP
GO:MF	phospholipid binding	GO:0005543	0.0171078	1.76681	389	1200	50	16724	THBS1,PHLDA1,ATP8B1,CGAS,DAB2IP,TICAM2,GOLPH3,SYT7,ANXA10,SNX18,PLEKHA4,ARAP2,SNX16,CPNE8,MYO1E,TWF1,ANKFY1,AIDA,HSPA8,RPS6KC1,SCIN,MYOF,ING2,SGK3,SVIL,IQGAP1,VPS36,PRKCI,GSDMD,PIK3C2A,TULP3,ANXA1,PLEKHF2,MITD1,SNX4,OGT,PARD3,PCYT1A,PXK,SNX10,SCARB2,SH3PXD2A,AMER1,DENND1B,SGK1,SBF2,TTPAL,C2CD5,ARHGAP9,OSBPL8
GO:MF	tubulin binding	GO:0015631	0.0178128	1.74927	308	1200	42	16724	FAM110C,KIF2C,MAPRE3,DIXDC1,CLIP1,MX2,FHDC1,KIF11,DDX3X,MAP2,POLB,CENPE,KIF18A,GJA1,TRIM36,HOOK3,CEP350,SBDS,HAUS6,RMDN3,DLGAP5,KIF27,LRRK2,EML4,INO80,KIF23,APC,KIF2A,PDE4B,BCL2L11,PHF6,MAP4K4,GAS2L3,STARD9,KIF5C,LRPPRC,DIP2B,KIF3B,TBCC,KATNAL1,NAV3,TAOK1
GO:MF	cation binding	GO:0043169	0.0178937	1.7473	2869	1200	257	16724	RNF19B,ADAMTS1,ZNFX1,TRIM25,ITGA2,DTX3L,RNF122,GTF2B,PLCH1,LAP3,TRIM21,TRIM16,CYP24A1,PNKD,GCLC,THBS1,RNF125,ZC3HAV1,IFIH1,PDE3B,NT5DC3,ATP8B1,LIPH,LIMA1,PDP1,PPA1,SAMHD1,SMAD1,TGM2,DDX58,ITGA1,ATP9A,BIRC3,EGLN3,SLC34A2,CDADC1,NT5E,SP110,TNFSF10,ADA,DYRK2,TRIM38,ZFP36,SOD2,ANXA10,MTHFD2,PPARD,PCGF5,ERAP2,LRP8,BIRC2,ZFP36L1,LOC509283,ZGPAT,PML,TRIM14,CYBRD1,TRIM34,PRICKLE3,EXO1,HNF4G,ATP13A3,ERAP1…
GO:MF	ubiquitin protein ligase binding	GO:0031625	0.0212316	1.67302	222	1200	33	16724	CASP8,RIPK1,GABARAPL1,FBXO7,DAXX,PML,TXNIP,LTBR,RFFL,TRIB2,BCL10,MC1R,HIF1A,TRIB1,HSPA8,UBXN7,PIAS2,GSK3B,PIAS1,HLTF,NEK6,NLK,EGFR,RB1,EGR2,CRK,APC,USP25,BLZF1,BRCA1,LRPPRC,TMBIM6,SMC6
GO:MF	thiol-dependent deubiquitinase	GO:0004843	0.0285468	1.54444	91	1200	18	16724	VCPIP1,USP18,OTUD4,ZUP1,USP9X,USP33,USP15,CYLD,USP42,USP34,USP32,USP37,USP31,USP53,USP25,TNFAIP3,USP24,OTUB2
GO:MF	deubiquitinase activity	GO:0101005	0.0331471	1.47955	92	1200	18	16724	VCPIP1,USP18,OTUD4,ZUP1,USP9X,USP33,USP15,CYLD,USP42,USP34,USP32,USP37,USP31,USP53,USP25,TNFAIP3,USP24,OTUB2
GO:MF	hydrolase activity	GO:0016787	0.0436583	1.35993	2195	1200	201	16724	LOC512486,ADAMTS1,LOC511531,TUBB3,LOC507055,PLCH1,LAP3,MX1,ADAR,TRANK1,PNKD,ISG20,IFIH1,PDE3B,NT5DC3,GBP4,LIPH,PDP1,PPA1,VCPIP1,RRAS2,SAMHD1,TGM2,KIF2C,PTPDC1,DDX58,CASP8,CDADC1,NT5E,USP18,RAB8B,ADA,PSMB10,RHOBTB3,DUSP16,MTHFD2,PSMB9,PRORSD1,RAB20,ERAP2,HGF,TNS2,CASP7,RNASEL,LOC781710,PTPRJ,C1RL,OTUD4,GBP5,DESI1,SMG6,CASP4,PSMB8,SENP2,EXO1,PTPN13,PLCXD2,ERAP1,KHNYN,N4BP1,MX2,UBASH3B,RAB33B,MYO1E,…
GO:MF	protein serine kinase activity	GO:0106310	0.0451505	1.34534	146	1200	24	16724	MAST4,LRRK1,RIPK2,STK3,EIF2AK4,RPS6KC1,ROCK2,ATM,MASTL,MAP4K5,PRKCI,PRKAA2,LRRK2,SLK,NLK,SMG1,PKN2,ATR,PRKD3,RPS6KA3,TRPM7,MAP3K13,CSNK1G1,CSNK1G3
GO:MF	pyrophosphatase activity	GO:0016462	0.0495646	1.30483	459	1200	55	16724	LOC512486,LOC511531,TUBB3,LOC507055,MX1,GBP4,PPA1,RRAS2,KIF2C,RAB8B,RHOBTB3,RAB20,LOC781710,GBP5,MX2,RAB33B,MYO1E,FITM2,RND3,RAP2A,KIF11,RAB27A,DDX3X,LOC100141266,GNAQ,NUDT4,GEM,RAB31,CENPE,RAB30,NUDT7,KIF18A,LOC513659,MYH10,KIF27,MYO9A,LRRK2,NRAS,GTPBP1,MYO5A,KIF23,RNGTT,CRACR2A,DYNC1H1,TUBA1C,KIF2A,ATL2,DHX9,LOC112443216,STARD9,RAB4B,KIF5C,KIF3B,GMPS,TBCC
GO:BP	immune system process	GO:0002376	5.54068e-26	25.2564	1988	1256	279	17231	IRF8,NLRC5,RNF19B,TAP1,CIITA,LOC512486,IRF1,LOC511531,STAT3,SBNO2,PARP14,CSF1,TRIM25,STAT2,IRF9,FST,IRF7,IFNAR2,OAS1Y,DTX3L,LOC507055,ICOSLG,PARP9,TRIM21,MX1,ADAR,SLFN11,STAT1,TLR4,ISG20,THBS1,BCL3,RNF125,CD74,ARHGEF5,IFIH1,ZBP1,IFIT5,EIF2AK2,GBP4,NMI,BOLA-DRB3,IFI16,CD47,SAMHD1,CGAS,LOC101905041,BOLA-DRA,IFIT2,TICAM2,DDX58,BOLA-DMB,CASP8,FAS,TNFRSF1A,ITGA1,LOC100139670,TNFSF10,SDC4,TNFSF13B,TAPB…
GO:BP	positive regulation of biological process	GO:0048518	9.80104e-25	24.0087	4684	1256	514	17231	IRF8,NLRC5,RNF19B,CIITA,IRF1,ADAMTS1,STAT3,SBNO2,PARP14,CSF1,TRIM25,FAM110C,FST,IRF7,SOCS3,DTX3L,RNF122,ICOSLG,PARP9,TEAD4,TRIM21,TRIM16,ADAR,SLFN11,STAT1,TLR4,THBS1,BCL3,PHLDA1,ZC3HAV1,CDKN2AIP,CD74,ARHGEF5,IFIH1,ZBP1,IFIT5,EIF2AK2,NMI,ATF3,IFI16,CD47,RRAS2,MAFF,SMAD1,ATAD1,CGAS,ARL6IP5,LOC101905041,NAMPT,TGM2,BOLA-DRA,MCL1,DAB2IP,IFIT2,TICAM2,DDX58,AIFM2,CASP8,FAS,TNFRSF1A,ITGA1,LOC100139670,OS…
GO:BP	intracellular signal transduction	GO:0035556	5.50602e-24	23.2592	1971	1256	272	17231	CSF1,TRIM25,FAM110C,SOCS3,PLCH1,TEAD4,TRIM21,STAT1,TLR4,THBS1,BCL3,RNF125,CD74,ARHGEF5,IFIH1,STARD13,DOCK9,IFIT5,EIF2AK2,PDE3B,CISH,NMI,ATF3,RRAS2,SMAD1,CGAS,ARL6IP5,MCL1,DAB2IP,CASP8,FAS,TNFRSF1A,STARD8,ARHGAP28,TNFSF10,RIPK1,ADA,TMEM106A,DYRK2,TRIM38,GOLPH3,ZFP36,TIFA,PMAIP1,RTKN2,DUSP16,PPARD,HGF,PLEKHA1,ZFP36L1,TNS2,EPHB2,SEMA7A,SPRED1,CEBPB,PML,PTPRJ,SOCS1,TRIM34,SCHIP1,PAG1,LTBR,DEPDC1,ATP2…
GO:BP	regulation of response to stimulus	GO:0048583	1.22534e-23	22.9117	2816	1256	350	17231	NLRC5,IRF1,STAT3,SBNO2,PARP14,CSF1,TRIM25,FAM110C,FST,IRF7,SOCS3,DTX3L,ICOSLG,PARP9,TRIM21,TRIM16,ADAR,STAT1,TLR4,THBS1,BCL3,RNF125,CDKN2AIP,CD74,ARHGEF5,IFIH1,STARD13,ZBP1,IFIT5,EIF2AK2,PDE3B,NMI,ATF3,IFI16,CD47,SAMHD1,CGAS,ARL6IP5,LOC101905041,BOLA-DRA,MCL1,DAB2IP,TICAM2,AIFM2,CASP8,FAS,TNFRSF1A,ITGA1,LOC100139670,STARD8,RGS16,ARHGAP28,CLDN1,NT5E,TNFSF10,TNFSF13B,RIPK1,ADA,TMEM106A,IL7,SOSTDC1,…
GO:BP	response to cytokine	GO:0034097	6.5019e-22	21.187	653	1256	127	17231	IRF8,NLRC5,CIITA,LOC512486,IRF1,LOC511531,STAT3,SBNO2,PARP14,CSF1,TRIM25,STAT2,IL15RA,IRF7,SOCS3,IFNAR2,LOC507055,PARP9,TRIM21,MX1,ADAR,STAT1,TLR4,RNF125,CD74,IFIH1,ZBP1,EIF2AK2,GBP4,NMI,ARID5B,IFI16,CD47,SAMHD1,MCL1,DAB2IP,IFIT2,TICAM2,CASP8,FAS,TNFRSF1A,LOC100139670,OSMR,TNFSF13B,RIPK1,IL7,ZFP36,OAS2,IFIT3,IL4R,XAF1,RAB20,ZFP36L1,PML,LOC781710,OTUD4,SOCS1,GBP5,GCLM,IL6ST,IFNAR1,STXBP3,MX2,KLF4,…
GO:BP	response to stress	GO:0006950	4.31349e-21	20.3652	2627	1256	325	17231	IRF8,NLRC5,RNF19B,TAP1,CIITA,LOC512486,IRF1,LOC511531,STAT3,SBNO2,PARP14,CSF1,TRIM25,STAT2,IRF7,SOCS3,IFNAR2,OAS1Y,DTX3L,LOC507055,PARP9,TRIM21,MX1,ADAR,SLFN11,STAT1,TLR4,ISG20,GCLC,THBS1,UBA7,BCL3,RNF125,CDKN2AIP,CD74,IFIH1,ZBP1,IFIT5,EIF2AK2,GBP4,NMI,ATF3,IFI16,CD47,VCPIP1,SAMHD1,SMAD1,CGAS,ARL6IP5,LOC101905041,MCL1,DAB2IP,IFIT2,TICAM2,DDX58,AIFM2,FAS,TNFRSF1A,LOC100139670,CLDN1,EGLN3,NT5E,SDC4…
GO:BP	positive regulation of cellular process	GO:0048522	1.0989e-20	19.959	4274	1256	466	17231	IRF8,NLRC5,RNF19B,CIITA,IRF1,ADAMTS1,STAT3,SBNO2,PARP14,CSF1,TRIM25,FAM110C,IRF7,SOCS3,DTX3L,RNF122,PARP9,TEAD4,TRIM21,TRIM16,SLFN11,STAT1,TLR4,THBS1,BCL3,PHLDA1,ZC3HAV1,CDKN2AIP,CD74,ARHGEF5,ZBP1,IFIT5,EIF2AK2,NMI,ATF3,CD47,RRAS2,MAFF,SMAD1,ATAD1,CGAS,ARL6IP5,NAMPT,TGM2,BOLA-DRA,MCL1,DAB2IP,IFIT2,TICAM2,AIFM2,CASP8,FAS,TNFRSF1A,ITGA1,OSMR,BIRC3,CLDN1,EGLN3,TNFSF10,SDC4,TNFSF13B,RIPK1,ADA,TMEM106…
GO:BP	regulation of signal transduction	GO:0009966	3.05394e-20	19.5151	2167	1256	280	17231	NLRC5,IRF1,STAT3,PARP14,CSF1,TRIM25,FAM110C,FST,IRF7,SOCS3,PARP9,TRIM21,TRIM16,ADAR,STAT1,TLR4,THBS1,BCL3,RNF125,CDKN2AIP,CD74,ARHGEF5,STARD13,ZBP1,IFIT5,EIF2AK2,PDE3B,NMI,ATF3,SAMHD1,CGAS,ARL6IP5,MCL1,DAB2IP,TICAM2,CASP8,FAS,TNFRSF1A,ITGA1,STARD8,RGS16,ARHGAP28,TNFSF10,RIPK1,ADA,TMEM106A,IL7,SOSTDC1,DYRK2,TRIM38,GOLPH3,TIFA,PMAIP1,RTKN2,DUSP16,PPARD,INHBA,PLEKHA4,HGF,PLEKHA1,PVR,MVP,TNS2,EPHB2,S…
GO:BP	negative regulation of biological process	GO:0048519	3.01743e-18	17.5204	4057	1256	439	17231	IRF8,NLRC5,CIITA,IRF1,ADAMTS1,STAT3,SBNO2,PARP14,CSF1,ZNFX1,TRIM25,FST,SOCS3,OAS1Y,DTX3L,PARP9,TRIM21,MX1,ADAR,SLFN11,STAT1,TLR4,PNKD,ISG20,GCLC,THBS1,BCL3,RNF125,ZC3HAV1,CDKN2AIP,CD74,STARD13,IFIT5,EIF2AK2,PDE3B,ATP8B1,NMI,ATF3,ARID5B,LIMA1,SAMHD1,SMAD1,ATAD1,CGAS,ARL6IP5,MCL1,DAB2IP,CHSY1,AIFM2,CASP8,FAS,TNFRSF1A,ITGA1,ATP9A,LOC100139670,BIRC3,RGS16,ARHGAP28,NT5E,ID1,SDC4,CARHSP1,TAPBPL,RIPK1,A…
GO:BP	response to biotic stimulus	GO:0009607	1.0055e-17	16.9976	1006	1256	158	17231	IRF8,NLRC5,RNF19B,CIITA,LOC512486,IRF1,LOC511531,SBNO2,PARP14,CSF1,TRIM25,STAT2,IRF7,IFNAR2,OAS1Y,DTX3L,LOC507055,PARP9,TRIM21,MX1,ADAR,SLFN11,STAT1,TLR4,ISG20,BCL3,RNF125,ZC3HAV1,CD74,IFIH1,CMPK2,ZBP1,IFIT5,EIF2AK2,GBP4,NMI,IFI16,SAMHD1,CGAS,LOC101905041,DAB2IP,IFIT2,TICAM2,DDX58,TNFRSF1A,LOC100139670,ZFP36,TIFA,OAS2,PMAIP1,PPP1R15B,ARID5A,IFIT3,CD274,HERC5,RAB20,LRP8,PVR,LOC100298356,CEBPB,PML,…
GO:BP	regulation of signaling	GO:0023051	1.10647e-17	16.9561	2439	1256	297	17231	NLRC5,IRF1,STAT3,PARP14,CSF1,TRIM25,FAM110C,FST,IRF7,SOCS3,PARP9,TRIM21,TRIM16,ADAR,STAT1,TLR4,PNKD,THBS1,BCL3,RNF125,CDKN2AIP,CD74,ARHGEF5,STARD13,ZBP1,IFIT5,EIF2AK2,PDE3B,NMI,ATF3,SAMHD1,ATAD1,CGAS,ARL6IP5,MCL1,DAB2IP,TICAM2,CASP8,FAS,TNFRSF1A,ITGA1,STARD8,RGS16,ARHGAP28,TNFSF10,RIPK1,ADA,TMEM106A,IL7,SOSTDC1,DYRK2,TRIM38,GOLPH3,TIFA,PMAIP1,RTKN2,DUSP16,PPARD,INHBA,PLEKHA4,HGF,LRP8,PLEKHA1,PVR,…
GO:BP	regulation of cell communication	GO:0010646	1.18147e-17	16.9276	2429	1256	296	17231	NLRC5,IRF1,STAT3,PARP14,CSF1,TRIM25,FAM110C,FST,IRF7,SOCS3,PARP9,TRIM21,TRIM16,ADAR,STAT1,TLR4,PNKD,THBS1,BCL3,RNF125,CDKN2AIP,CD74,ARHGEF5,STARD13,ZBP1,IFIT5,EIF2AK2,PDE3B,NMI,ATF3,SAMHD1,ATAD1,CGAS,ARL6IP5,MCL1,DAB2IP,TICAM2,CASP8,FAS,TNFRSF1A,ITGA1,STARD8,RGS16,ARHGAP28,TNFSF10,RIPK1,ADA,TMEM106A,IL7,SOSTDC1,DYRK2,TRIM38,GOLPH3,TIFA,PMAIP1,RTKN2,DUSP16,PPARD,INHBA,PLEKHA4,HGF,LRP8,PLEKHA1,PVR,…
GO:BP	cellular response to cytokine stimulus	GO:0071345	1.81437e-17	16.7413	601	1256	112	17231	IRF8,NLRC5,LOC512486,IRF1,LOC511531,STAT3,SBNO2,PARP14,CSF1,TRIM25,STAT2,IL15RA,IRF7,SOCS3,IFNAR2,LOC507055,PARP9,MX1,ADAR,STAT1,TLR4,RNF125,CD74,ZBP1,GBP4,NMI,ARID5B,IFI16,CD47,SAMHD1,DAB2IP,IFIT2,TICAM2,FAS,TNFRSF1A,LOC100139670,OSMR,TNFSF13B,RIPK1,IL7,ZFP36,OAS2,IFIT3,IL4R,RAB20,ZFP36L1,PML,LOC781710,OTUD4,SOCS1,GBP5,GCLM,IL6ST,IFNAR1,STXBP3,KLF4,KRT8,JAK2,EPS8,ISG15,RFFL,NUMBL,IL2RB,STXBP1,TB…
GO:BP	regulation of intracellular signal transduction	GO:1902531	2.52869e-17	16.5971	1197	1256	177	17231	CSF1,TRIM25,FAM110C,TRIM21,STAT1,TLR4,THBS1,BCL3,RNF125,CD74,ARHGEF5,STARD13,IFIT5,EIF2AK2,PDE3B,NMI,ATF3,CGAS,ARL6IP5,MCL1,DAB2IP,CASP8,FAS,TNFRSF1A,STARD8,ARHGAP28,TNFSF10,RIPK1,ADA,TMEM106A,DYRK2,TRIM38,GOLPH3,TIFA,PMAIP1,RTKN2,DUSP16,PPARD,HGF,PLEKHA1,EPHB2,SEMA7A,SPRED1,PTPRJ,TRIM34,SCHIP1,LTBR,ATP2B4,RELL1,EPS8,CD2AP,RFFL,RAP2A,PTK2,CFLAR,ABL1,RICTOR,AIDA,TRIM5,RBCK1,DUSP10,TBK1,LRRK1,UBR1,…
GO:BP	regulation of response to stress	GO:0080134	4.50455e-17	16.3463	854	1256	140	17231	NLRC5,SBNO2,PARP14,IRF7,SOCS3,DTX3L,PARP9,TRIM21,ADAR,STAT1,TLR4,THBS1,RNF125,CD74,ZBP1,EIF2AK2,NMI,IFI16,CD47,SAMHD1,CGAS,ARL6IP5,LOC101905041,MCL1,DAB2IP,AIFM2,FAS,TNFRSF1A,LOC100139670,CLDN1,NT5E,RIPK1,ADA,ZFP36,FBXO7,PARP3,PMAIP1,PPP1R15B,PPARD,HERC5,HGF,LRP8,PVR,EPHB2,SEMA7A,SPRED1,CEBPB,PML,C3,SOCS1,LTBR,ATP2B4,N4BP1,RELL1,UBASH3B,KLF4,BFAR,ISG15,TIGAR,ANO6,RAP2A,PTK2,LDLR,ABL1,RICTOR,AIDA,…
GO:BP	positive regulation of metabolic process	GO:0009893	5.58225e-17	16.2532	2881	1256	334	17231	IRF8,NLRC5,RNF19B,CIITA,IRF1,STAT3,SBNO2,PARP14,CSF1,TRIM25,IRF7,DTX3L,TEAD4,TRIM21,TRIM16,ADAR,STAT1,TLR4,THBS1,BCL3,ZC3HAV1,CD74,ARHGEF5,IFIH1,EIF2AK2,NMI,ATF3,MAFF,SMAD1,ATAD1,CGAS,ARL6IP5,NAMPT,DAB2IP,TICAM2,DDX58,CASP8,FAS,TNFRSF1A,ITGA1,BIRC3,EGLN3,TNFSF10,RIPK1,TMEM106A,KLF6,IL7,DYRK2,ZFP36,OAS2,FBXO7,PARP3,BACH1,PMAIP1,PPP1R15B,ARID5A,PPARD,PCGF5,INHBA,DAXX,HGF,LRP8,MAPRE3,NEDD9,BIRC2,SPP…
GO:BP	positive regulation of response to stimulus	GO:0048584	5.9598e-17	16.2248	1516	1256	208	17231	NLRC5,STAT3,PARP14,CSF1,TRIM25,FAM110C,IRF7,DTX3L,ICOSLG,PARP9,TRIM21,TRIM16,TLR4,THBS1,CDKN2AIP,CD74,ARHGEF5,IFIH1,ZBP1,IFIT5,EIF2AK2,NMI,ATF3,IFI16,CD47,CGAS,ARL6IP5,LOC101905041,BOLA-DRA,MCL1,DAB2IP,TICAM2,CASP8,FAS,TNFRSF1A,CLDN1,TNFSF10,TNFSF13B,RIPK1,ADA,TMEM106A,IL7,TRIM38,GOLPH3,TIFA,PARP3,PMAIP1,ARID5A,RTKN2,PPARD,INHBA,PLEKHA4,HGF,PLEKHA1,PVR,SEMA7A,SPRED1,CEBPB,PML,LOC618733,PTPRJ,C3,S…
GO:BP	response to organic substance	GO:0010033	1.34838e-16	15.8702	2052	1256	258	17231	IRF8,NLRC5,CIITA,LOC512486,IRF1,LOC511531,STAT3,SBNO2,PARP14,CSF1,TRIM25,STAT2,IL15RA,FST,IRF7,SOCS3,IFNAR2,LOC507055,PARP9,TRIM21,TRIM16,MX1,ADAR,STAT1,TLR4,CYP24A1,GCLC,THBS1,RNF125,CD74,IFIH1,CMPK2,ZBP1,EIF2AK2,GBP4,NMI,ATF3,ARID5B,IFI16,CD47,SAMHD1,SMAD1,CGAS,ARL6IP5,LOC101905041,TGM2,MCL1,DAB2IP,IFIT2,TICAM2,DDX58,CASP8,FAS,TNFRSF1A,LOC100139670,OSMR,SLC34A2,TNFSF13B,RIPK1,RAB8B,IL7,SOSTDC1,…
GO:BP	immune response	GO:0006955	1.96212e-16	15.7073	1299	1256	185	17231	IRF8,NLRC5,RNF19B,TAP1,CIITA,LOC512486,IRF1,LOC511531,STAT3,SBNO2,PARP14,CSF1,TRIM25,STAT2,IRF7,IFNAR2,OAS1Y,DTX3L,LOC507055,ICOSLG,PARP9,TRIM21,MX1,ADAR,SLFN11,STAT1,TLR4,ISG20,THBS1,BCL3,RNF125,CD74,IFIH1,ZBP1,IFIT5,EIF2AK2,GBP4,NMI,BOLA-DRB3,IFI16,SAMHD1,CGAS,LOC101905041,BOLA-DRA,IFIT2,TICAM2,DDX58,BOLA-DMB,FAS,TNFRSF1A,LOC100139670,TNFSF10,TNFSF13B,ADA,IL7,TIFA,OAS2,PARP3,PMAIP1,ARID5A,IFIT3…
GO:BP	defense response to other organism	GO:0098542	2.71439e-16	15.5663	735	1256	125	17231	IRF8,NLRC5,RNF19B,CIITA,LOC512486,IRF1,LOC511531,PARP14,CSF1,TRIM25,STAT2,IRF7,IFNAR2,OAS1Y,DTX3L,LOC507055,PARP9,TRIM21,MX1,ADAR,SLFN11,STAT1,TLR4,ISG20,BCL3,RNF125,CD74,IFIH1,ZBP1,IFIT5,EIF2AK2,GBP4,NMI,IFI16,SAMHD1,CGAS,LOC101905041,IFIT2,TICAM2,DDX58,TNFRSF1A,LOC100139670,TIFA,OAS2,PMAIP1,IFIT3,HERC5,RAB20,LRP8,PVR,LOC100298356,CEBPB,PML,RNASEL,LOC781710,TRIM14,OAS1X,C3,SOCS1,GBP5,BATF2,LGALS…
GO:BP	response to other organism	GO:0051707	3.25331e-16	15.4877	975	1256	151	17231	IRF8,NLRC5,RNF19B,CIITA,LOC512486,IRF1,LOC511531,SBNO2,PARP14,CSF1,TRIM25,STAT2,IRF7,IFNAR2,OAS1Y,DTX3L,LOC507055,PARP9,TRIM21,MX1,ADAR,SLFN11,STAT1,TLR4,ISG20,BCL3,RNF125,ZC3HAV1,CD74,IFIH1,CMPK2,ZBP1,IFIT5,EIF2AK2,GBP4,NMI,IFI16,SAMHD1,CGAS,LOC101905041,DAB2IP,IFIT2,TICAM2,DDX58,TNFRSF1A,LOC100139670,ZFP36,TIFA,OAS2,PMAIP1,ARID5A,IFIT3,CD274,HERC5,RAB20,LRP8,PVR,LOC100298356,CEBPB,PML,RNASEL,LO…
GO:BP	response to external biotic stimulus	GO:0043207	3.59009e-16	15.4449	976	1256	151	17231	IRF8,NLRC5,RNF19B,CIITA,LOC512486,IRF1,LOC511531,SBNO2,PARP14,CSF1,TRIM25,STAT2,IRF7,IFNAR2,OAS1Y,DTX3L,LOC507055,PARP9,TRIM21,MX1,ADAR,SLFN11,STAT1,TLR4,ISG20,BCL3,RNF125,ZC3HAV1,CD74,IFIH1,CMPK2,ZBP1,IFIT5,EIF2AK2,GBP4,NMI,IFI16,SAMHD1,CGAS,LOC101905041,DAB2IP,IFIT2,TICAM2,DDX58,TNFRSF1A,LOC100139670,ZFP36,TIFA,OAS2,PMAIP1,ARID5A,IFIT3,CD274,HERC5,RAB20,LRP8,PVR,LOC100298356,CEBPB,PML,RNASEL,LO…
GO:BP	biological process involved in interspecies interaction between organisms	GO:0044419	5.12695e-16	15.2901	1075	1256	161	17231	IRF8,NLRC5,RNF19B,CIITA,LOC512486,IRF1,LOC511531,SBNO2,PARP14,CSF1,TRIM25,STAT2,IRF7,IFNAR2,OAS1Y,DTX3L,LOC507055,PARP9,TRIM21,MX1,ADAR,SLFN11,STAT1,TLR4,ISG20,BCL3,RNF125,ZC3HAV1,CD74,IFIH1,CMPK2,ZBP1,IFIT5,EIF2AK2,GBP4,NMI,IFI16,SAMHD1,CGAS,LOC101905041,DAB2IP,IFIT2,TICAM2,DDX58,TNFRSF1A,LOC100139670,TRIM38,ZFP36,TIFA,OAS2,PMAIP1,ARID5A,IFIT3,CD274,HERC5,RAB20,LRP8,PVR,LOC100298356,CEBPB,PML,RN…
GO:BP	protein modification process	GO:0036211	7.80374e-16	15.1077	3159	1256	354	17231	RNF19B,PARP14,CSF1,TRIM25,SOCS3,DTX3L,RNF122,GTF2B,PARP9,TRIM21,TRIM16,ADAR,TLR4,THBS1,UBA7,RNF125,CD74,ARHGEF5,IFIH1,EIF2AK2,NMI,PDP1,VCPIP1,SMAD1,TGM2,DAB2IP,PTPDC1,FAS,TNFRSF1A,ITGA1,BIRC3,EGLN3,B4GALT5,USP18,RIPK1,IL7,DYRK2,FBXO7,PARP3,PPP1R15B,ARID5A,DUSP16,CDK17,PARP8,PCGF5,INHBA,HERC5,DAXX,HGF,LRP8,MAPRE3,NEDD9,BIRC2,MVP,TNS2,EPHB2,SEMA7A,SPRED1,LOC509283,PML,RNASEL,SDHAF2,PTPRJ,C3,OTUD4,S…
GO:BP	cellular protein modification process	GO:0006464	7.80374e-16	15.1077	3159	1256	354	17231	RNF19B,PARP14,CSF1,TRIM25,SOCS3,DTX3L,RNF122,GTF2B,PARP9,TRIM21,TRIM16,ADAR,TLR4,THBS1,UBA7,RNF125,CD74,ARHGEF5,IFIH1,EIF2AK2,NMI,PDP1,VCPIP1,SMAD1,TGM2,DAB2IP,PTPDC1,FAS,TNFRSF1A,ITGA1,BIRC3,EGLN3,B4GALT5,USP18,RIPK1,IL7,DYRK2,FBXO7,PARP3,PPP1R15B,ARID5A,DUSP16,CDK17,PARP8,PCGF5,INHBA,HERC5,DAXX,HGF,LRP8,MAPRE3,NEDD9,BIRC2,MVP,TNS2,EPHB2,SEMA7A,SPRED1,LOC509283,PML,RNASEL,SDHAF2,PTPRJ,C3,OTUD4,S…
GO:BP	response to virus	GO:0009615	1.04424e-15	14.9812	254	1256	64	17231	NLRC5,IRF1,IRF7,IFNAR2,OAS1Y,DTX3L,MX1,ADAR,SLFN11,STAT1,ISG20,BCL3,RNF125,ZC3HAV1,IFIH1,ZBP1,IFIT5,EIF2AK2,NMI,SAMHD1,CGAS,IFIT2,TICAM2,DDX58,LOC100139670,OAS2,PMAIP1,IFIT3,HERC5,LOC100298356,RNASEL,OAS1X,TBX21,LGALS8,MX2,TTC4,LOC112441507,ISG15,AKAP1,TRIM5,DDX3X,PUM1,HIF1A,ITGB8,ITCH,TRAF3IP2,USP15,LOC616948,MOV10,DHX58,IL12A,NLRX1,MAVS,TRIM44,DDX21,POLR3A,FMR1,SEC14L1,PSMA2,IRF3,BATF3,RNF135,C…
GO:BP	cellular response to organic substance	GO:0071310	2.0181e-15	14.6951	1708	1256	222	17231	IRF8,NLRC5,LOC512486,IRF1,LOC511531,STAT3,SBNO2,PARP14,CSF1,TRIM25,STAT2,IL15RA,FST,IRF7,SOCS3,IFNAR2,LOC507055,PARP9,MX1,ADAR,STAT1,TLR4,THBS1,RNF125,CD74,IFIH1,CMPK2,ZBP1,EIF2AK2,GBP4,NMI,ATF3,ARID5B,IFI16,CD47,SAMHD1,SMAD1,CGAS,ARL6IP5,TGM2,DAB2IP,IFIT2,TICAM2,FAS,TNFRSF1A,LOC100139670,OSMR,TNFSF13B,RIPK1,RAB8B,IL7,SOSTDC1,GOLPH3,ZFP36,OAS2,ARID5A,IFIT3,CD274,PPARD,IL4R,RAB20,DAXX,HGF,SPP1,ZFP…
GO:BP	positive regulation of signal transduction	GO:0009967	2.27323e-15	14.6434	1101	1256	162	17231	NLRC5,STAT3,PARP14,CSF1,TRIM25,FAM110C,IRF7,PARP9,TRIM21,TRIM16,TLR4,THBS1,CDKN2AIP,CD74,ARHGEF5,ZBP1,IFIT5,EIF2AK2,NMI,ATF3,CGAS,ARL6IP5,MCL1,DAB2IP,TICAM2,CASP8,FAS,TNFRSF1A,TNFSF10,RIPK1,ADA,TMEM106A,IL7,TRIM38,GOLPH3,TIFA,PMAIP1,RTKN2,PPARD,INHBA,PLEKHA4,HGF,PVR,SEMA7A,SPRED1,PML,PTPRJ,C3,SOCS1,TRIM34,STX1A,SCHIP1,LTBR,IL6ST,DIXDC1,PTGDR2,DCDC2,RELL1,SDCBP,SALL1,PTK2,CFLAR,ABL1,RICTOR,TRIM5,R…
GO:BP	regulation of metabolic process	GO:0019222	2.54959e-15	14.5935	5430	1256	538	17231	IRF8,NLRC5,RNF19B,CIITA,IRF1,STAT3,SBNO2,PARP14,CSF1,ZNFX1,TRIM25,STAT2,IRF9,FST,IRF7,SOCS3,OAS1Y,DTX3L,ICOSLG,PARP9,TEAD4,TRIM21,TRIM16,ADAR,SLFN11,STAT1,TLR4,PNKD,GCLC,THBS1,BCL3,RNF125,ZC3HAV1,CD74,ARHGEF5,IFIH1,EIF2AK2,PDE3B,DRAM1,ATP8B1,NMI,ATF3,ARID5B,CD47,MAFF,SMAD1,ATAD1,CGAS,ARL6IP5,LOC101905041,NAMPT,MCL1,DAB2IP,TICAM2,DDX58,CASP8,FAS,TNFRSF1A,ITGA1,BIRC3,EGLN3,SP110,ID1,TNFSF10,CARHSP1…
GO:BP	defense response	GO:0006952	2.90027e-15	14.5376	1094	1256	161	17231	IRF8,NLRC5,RNF19B,TAP1,CIITA,LOC512486,IRF1,LOC511531,STAT3,SBNO2,PARP14,CSF1,TRIM25,STAT2,IRF7,SOCS3,IFNAR2,OAS1Y,DTX3L,LOC507055,PARP9,TRIM21,MX1,ADAR,SLFN11,STAT1,TLR4,ISG20,THBS1,BCL3,RNF125,CD74,IFIH1,ZBP1,IFIT5,EIF2AK2,GBP4,NMI,IFI16,CD47,SAMHD1,SMAD1,CGAS,LOC101905041,IFIT2,TICAM2,DDX58,TNFRSF1A,LOC100139670,NT5E,RIPK1,ADA,ZFP36,TIFA,OAS2,PMAIP1,IFIT3,PPARD,IL4R,HERC5,RAB20,HGF,LRP8,PVR,SE…
GO:BP	positive regulation of macromolecule metabolic process	GO:0010604	6.2269e-15	14.2057	2680	1256	309	17231	IRF8,NLRC5,RNF19B,CIITA,IRF1,STAT3,SBNO2,PARP14,CSF1,TRIM25,IRF7,DTX3L,TEAD4,TRIM21,TRIM16,ADAR,STAT1,TLR4,THBS1,BCL3,ZC3HAV1,CD74,ARHGEF5,IFIH1,EIF2AK2,NMI,ATF3,MAFF,SMAD1,ATAD1,CGAS,ARL6IP5,NAMPT,DAB2IP,TICAM2,DDX58,CASP8,FAS,TNFRSF1A,ITGA1,BIRC3,EGLN3,TNFSF10,RIPK1,TMEM106A,KLF6,IL7,DYRK2,ZFP36,OAS2,PARP3,BACH1,PMAIP1,PPP1R15B,ARID5A,PPARD,PCGF5,INHBA,DAXX,HGF,LRP8,MAPRE3,NEDD9,BIRC2,SPP1,ZFP3…
GO:BP	positive regulation of cellular metabolic process	GO:0031325	1.60056e-14	13.7957	2527	1256	294	17231	IRF8,NLRC5,RNF19B,CIITA,IRF1,STAT3,SBNO2,PARP14,CSF1,TRIM25,IRF7,DTX3L,TEAD4,TRIM21,TRIM16,STAT1,TLR4,THBS1,BCL3,ZC3HAV1,CD74,ARHGEF5,EIF2AK2,NMI,ATF3,MAFF,SMAD1,ATAD1,ARL6IP5,NAMPT,DAB2IP,CASP8,FAS,TNFRSF1A,ITGA1,BIRC3,EGLN3,TNFSF10,RIPK1,KLF6,DYRK2,ZFP36,FBXO7,PARP3,BACH1,PMAIP1,PPP1R15B,ARID5A,PPARD,PCGF5,INHBA,DAXX,HGF,LRP8,MAPRE3,NEDD9,BIRC2,SPP1,ZFP36L1,EPHB2,SEMA7A,CEBPB,PML,RNASEL,TRIM14,…
GO:BP	innate immune response	GO:0045087	1.62535e-14	13.7891	492	1256	93	17231	IRF8,NLRC5,RNF19B,CIITA,LOC512486,IRF1,LOC511531,PARP14,CSF1,TRIM25,STAT2,IRF7,IFNAR2,OAS1Y,LOC507055,PARP9,TRIM21,MX1,ADAR,STAT1,TLR4,CD74,IFIH1,ZBP1,GBP4,NMI,IFI16,SAMHD1,CGAS,LOC101905041,DDX58,LOC100139670,TIFA,OAS2,RAB20,LRP8,PVR,LOC100298356,PML,LOC781710,TRIM14,OAS1X,C3,SOCS1,GBP5,TRIM34,IFNAR1,STXBP3,N4BP1,TTC4,LOC112441507,IPO7,ISG15,AKAP1,PTK2,STXBP1,TRIM5,DUSP10,TBK1,BCL10,DDX3X,INAVA,…
GO:BP	macromolecule modification	GO:0043412	4.87422e-14	13.3121	3322	1256	361	17231	RNF19B,PARP14,CSF1,TRIM25,SOCS3,DTX3L,RNF122,GTF2B,PARP9,TRIM21,TRIM16,ADAR,TLR4,THBS1,UBA7,RNF125,CD74,ARHGEF5,IFIH1,EIF2AK2,NMI,PDP1,VCPIP1,SMAD1,TGM2,DAB2IP,PTPDC1,FAS,TNFRSF1A,ITGA1,BIRC3,EGLN3,B4GALT5,CDADC1,USP18,RIPK1,IL7,DYRK2,FBXO7,PARP3,PPP1R15B,ARID5A,DUSP16,CDK17,CMTR2,PARP8,PCGF5,INHBA,HERC5,DAXX,HGF,LRP8,MAPRE3,NEDD9,BIRC2,MVP,TNS2,EPHB2,SEMA7A,SPRED1,LOC509283,PML,RNASEL,SDHAF2,PTP…
GO:BP	protein modification by small protein conjugation or removal	GO:0070647	8.08403e-14	13.0924	815	1256	128	17231	RNF19B,TRIM25,DTX3L,RNF122,TRIM21,UBA7,RNF125,IFIH1,NMI,VCPIP1,BIRC3,USP18,FBXO7,PCGF5,HERC5,DAXX,BIRC2,LOC509283,PML,OTUD4,SOCS1,TRIM34,DESI1,STX1A,SENP2,WSB1,N4BP1,RNF114,BFAR,BCOR,ISG15,RFFL,RANBP2,DCUN1D3,PARP10,ABL1,TRIM5,FBXO30,RBCK1,XIAP,USP9X,UBR1,KCTD10,BCL10,SH3RF2,DDX3X,INAVA,ATXN7,HIF1A,RIPK2,ASXL1,ITCH,SPRY2,LOC785873,WSB2,TRAF3IP2,USP33,USP15,TNKS,LOC616948,PELI1,CYLD,PIAS2,RNF31,US…
GO:BP	positive regulation of cell communication	GO:0010647	1.01908e-13	12.9918	1215	1256	169	17231	NLRC5,STAT3,PARP14,CSF1,TRIM25,FAM110C,IRF7,PARP9,TRIM21,TRIM16,TLR4,THBS1,CDKN2AIP,CD74,ARHGEF5,ZBP1,IFIT5,EIF2AK2,NMI,ATF3,CGAS,ARL6IP5,MCL1,DAB2IP,TICAM2,CASP8,FAS,TNFRSF1A,TNFSF10,RIPK1,ADA,TMEM106A,IL7,TRIM38,GOLPH3,TIFA,PMAIP1,RTKN2,PPARD,INHBA,PLEKHA4,HGF,PVR,SPP1,EPHB2,SEMA7A,SPRED1,PML,PTPRJ,C3,SOCS1,TRIM34,STX1A,SCHIP1,LTBR,IL6ST,DIXDC1,PTGDR2,DCDC2,RELL1,SDCBP,SALL1,PTK2,CFLAR,ABL1,RIC…
GO:BP	negative regulation of cellular process	GO:0048523	1.2989e-13	12.8864	3724	1256	393	17231	IRF8,NLRC5,CIITA,IRF1,STAT3,SBNO2,PARP14,CSF1,ZNFX1,FST,SOCS3,DTX3L,TRIM21,ADAR,SLFN11,STAT1,TLR4,PNKD,GCLC,THBS1,BCL3,RNF125,CDKN2AIP,CD74,STARD13,EIF2AK2,PDE3B,ATP8B1,NMI,ATF3,ARID5B,LIMA1,SAMHD1,SMAD1,ATAD1,CGAS,ARL6IP5,MCL1,DAB2IP,AIFM2,CASP8,FAS,TNFRSF1A,ITGA1,ATP9A,BIRC3,RGS16,ARHGAP28,ID1,SDC4,RIPK1,ADA,IL7,SOSTDC1,DYRK2,GOLPH3,ZFP36,FBXO7,PARP3,BACH1,PPP1R15B,ARID5A,RTKN2,DUSP16,IFIT3,CLT…
GO:BP	regulation of macromolecule metabolic process	GO:0060255	1.50311e-13	12.823	5047	1256	500	17231	IRF8,NLRC5,RNF19B,CIITA,IRF1,STAT3,SBNO2,PARP14,CSF1,ZNFX1,TRIM25,STAT2,IRF9,FST,IRF7,SOCS3,OAS1Y,DTX3L,ICOSLG,PARP9,TEAD4,TRIM21,TRIM16,ADAR,SLFN11,STAT1,TLR4,GCLC,THBS1,BCL3,RNF125,ZC3HAV1,CD74,ARHGEF5,IFIH1,EIF2AK2,ATP8B1,NMI,ATF3,ARID5B,CD47,MAFF,SMAD1,ATAD1,CGAS,ARL6IP5,LOC101905041,NAMPT,DAB2IP,TICAM2,DDX58,CASP8,FAS,TNFRSF1A,ITGA1,BIRC3,EGLN3,SP110,ID1,TNFSF10,CARHSP1,RIPK1,TMEM106A,KLF6,I…
GO:BP	positive regulation of signaling	GO:0023056	1.64521e-13	12.7838	1221	1256	169	17231	NLRC5,STAT3,PARP14,CSF1,TRIM25,FAM110C,IRF7,PARP9,TRIM21,TRIM16,TLR4,THBS1,CDKN2AIP,CD74,ARHGEF5,ZBP1,IFIT5,EIF2AK2,NMI,ATF3,CGAS,ARL6IP5,MCL1,DAB2IP,TICAM2,CASP8,FAS,TNFRSF1A,TNFSF10,RIPK1,ADA,TMEM106A,IL7,TRIM38,GOLPH3,TIFA,PMAIP1,RTKN2,PPARD,INHBA,PLEKHA4,HGF,PVR,SPP1,EPHB2,SEMA7A,SPRED1,PML,PTPRJ,C3,SOCS1,TRIM34,STX1A,SCHIP1,LTBR,IL6ST,DIXDC1,PTGDR2,DCDC2,RELL1,SDCBP,SALL1,PTK2,CFLAR,ABL1,RIC…
GO:BP	response to external stimulus	GO:0009605	2.76968e-13	12.5576	1867	1256	230	17231	IRF8,NLRC5,RNF19B,CIITA,LOC512486,IRF1,LOC511531,SBNO2,PARP14,CSF1,TRIM25,STAT2,TUBB3,IRF7,SOCS3,IFNAR2,OAS1Y,DTX3L,LOC507055,PARP9,TRIM21,MX1,ADAR,SLFN11,STAT1,TLR4,CYP24A1,ISG20,THBS1,BCL3,RNF125,ZC3HAV1,CD74,ARHGEF5,IFIH1,CMPK2,ZBP1,IFIT5,EIF2AK2,GBP4,NMI,ATF3,IFI16,CD47,SAMHD1,CGAS,LOC101905041,DAB2IP,IFIT2,TICAM2,DDX58,CASP8,FAS,TNFRSF1A,ITGA1,LOC100139670,NT5E,RIPK1,ADA,ZFP36,TIFA,OAS2,PMAI…
GO:BP	regulation of response to biotic stimulus	GO:0002831	7.87039e-13	12.104	195	1256	51	17231	NLRC5,PARP14,IRF7,DTX3L,PARP9,TRIM21,ADAR,STAT1,TLR4,RNF125,ZBP1,NMI,IFI16,SAMHD1,CGAS,LOC100139670,HERC5,LRP8,PVR,SOCS1,N4BP1,ISG15,TIGAR,DUSP10,TBK1,PUM1,TRIB1,RIPK2,NECTIN2,ITCH,TRAF3IP2,USP15,DHX58,IL12A,EREG,NOD1,IFI35,MR1,NLRX1,MAVS,TRIM44,ARG2,IL18RAP,PTPN2,SEC14L1,IRF3,TNFAIP3,RNF135,CNOT7,PPP2R3C,MED1
GO:BP	regulation of cytokine production	GO:0001817	9.15084e-13	12.0385	497	1256	90	17231	IRF8,IRF1,STAT3,IRF7,ICOSLG,TRIM16,STAT1,TLR4,THBS1,BCL3,RNF125,CD74,IFIH1,EIF2AK2,NMI,CD47,CGAS,LOC101905041,TICAM2,DDX58,CASP8,RIPK1,TMEM106A,IL7,ZFP36,OAS2,ARID5A,HGF,EPHB2,SEMA7A,CEBPB,PML,C3,SOCS1,TBX21,GBP5,N4BP1,KLF4,ISG15,CD2AP,ABL1,ATP2B1,TBK1,TRIB2,BCL10,DDX3X,INAVA,MC1R,HIF1A,RIPK2,ITGB8,IL1R1,PELI1,FFAR4,IL17RC,IQGAP1,DHX58,IL12A,PANX1,EREG,NOD1,GSDMD,HOMER2,ANXA1,NLRX1,MAVS,ITGAV,CD1…
GO:BP	defense response to symbiont	GO:0140546	1.24417e-12	11.9051	197	1256	51	17231	NLRC5,IRF1,IRF7,IFNAR2,OAS1Y,DTX3L,MX1,ADAR,SLFN11,STAT1,ISG20,RNF125,IFIH1,ZBP1,IFIT5,EIF2AK2,SAMHD1,CGAS,IFIT2,TICAM2,DDX58,LOC100139670,OAS2,PMAIP1,IFIT3,HERC5,LOC100298356,RNASEL,OAS1X,MX2,TTC4,LOC112441507,ISG15,AKAP1,TRIM5,PUM1,ITCH,TRAF3IP2,USP15,LOC616948,MOV10,DHX58,NLRX1,MAVS,TRIM44,POLR3A,SEC14L1,IRF3,RNF135,CNOT7,LOC516599
GO:BP	defense response to virus	GO:0051607	1.24417e-12	11.9051	197	1256	51	17231	NLRC5,IRF1,IRF7,IFNAR2,OAS1Y,DTX3L,MX1,ADAR,SLFN11,STAT1,ISG20,RNF125,IFIH1,ZBP1,IFIT5,EIF2AK2,SAMHD1,CGAS,IFIT2,TICAM2,DDX58,LOC100139670,OAS2,PMAIP1,IFIT3,HERC5,LOC100298356,RNASEL,OAS1X,MX2,TTC4,LOC112441507,ISG15,AKAP1,TRIM5,PUM1,ITCH,TRAF3IP2,USP15,LOC616948,MOV10,DHX58,NLRX1,MAVS,TRIM44,POLR3A,SEC14L1,IRF3,RNF135,CNOT7,LOC516599
GO:BP	positive regulation of nitrogen compound metabolic process	GO:0051173	1.66338e-12	11.779	2385	1256	274	17231	IRF8,NLRC5,RNF19B,CIITA,IRF1,STAT3,SBNO2,PARP14,CSF1,TRIM25,IRF7,DTX3L,TEAD4,TRIM21,TRIM16,STAT1,TLR4,THBS1,BCL3,ZC3HAV1,CD74,ARHGEF5,EIF2AK2,NMI,ATF3,MAFF,SMAD1,ARL6IP5,NAMPT,DAB2IP,CASP8,FAS,TNFRSF1A,ITGA1,BIRC3,EGLN3,TNFSF10,RIPK1,TMEM106A,KLF6,ZFP36,PARP3,BACH1,PMAIP1,PPP1R15B,ARID5A,PPARD,PCGF5,INHBA,DAXX,HGF,LRP8,MAPRE3,NEDD9,BIRC2,SPP1,ZFP36L1,SEMA7A,CEBPB,PML,RNASEL,TRIM14,C3,OTUD4,IPPK,S…
GO:BP	cellular response to chemical stimulus	GO:0070887	2.01905e-12	11.6949	2164	1256	254	17231	IRF8,NLRC5,LOC512486,IRF1,LOC511531,STAT3,SBNO2,PARP14,CSF1,TRIM25,STAT2,IL15RA,FST,IRF7,SOCS3,IFNAR2,LOC507055,PARP9,MX1,ADAR,STAT1,TLR4,THBS1,RNF125,CD74,ARHGEF5,IFIH1,CMPK2,ZBP1,EIF2AK2,GBP4,NMI,ATF3,ARID5B,IFI16,CD47,SAMHD1,SMAD1,CGAS,ARL6IP5,TGM2,MCL1,DAB2IP,IFIT2,TICAM2,AIFM2,FAS,TNFRSF1A,ITGA1,LOC100139670,OSMR,EGLN3,TNFSF13B,RIPK1,RAB8B,IL7,SOSTDC1,GOLPH3,ZFP36,SOD2,OAS2,FBXO7,BACH1,PMAIP…
GO:BP	cytokine production	GO:0001816	2.22658e-12	11.6524	504	1256	90	17231	IRF8,IRF1,STAT3,IRF7,ICOSLG,TRIM16,STAT1,TLR4,THBS1,BCL3,RNF125,CD74,IFIH1,EIF2AK2,NMI,CD47,CGAS,LOC101905041,TICAM2,DDX58,CASP8,RIPK1,TMEM106A,IL7,ZFP36,OAS2,ARID5A,HGF,EPHB2,SEMA7A,CEBPB,PML,C3,SOCS1,TBX21,GBP5,N4BP1,KLF4,ISG15,CD2AP,ABL1,ATP2B1,TBK1,TRIB2,BCL10,DDX3X,INAVA,MC1R,HIF1A,RIPK2,ITGB8,IL1R1,PELI1,FFAR4,IL17RC,IQGAP1,DHX58,IL12A,PANX1,EREG,NOD1,GSDMD,HOMER2,ANXA1,NLRX1,MAVS,ITGAV,CD1…
GO:BP	regulation of molecular function	GO:0065009	3.02637e-12	11.5191	2317	1256	267	17231	NLRC5,STAT3,CSF1,TRIM25,OAS1Y,DTX3L,GTF2B,TRIM21,ADAR,TLR4,THBS1,BCL3,CD74,ARHGEF5,STARD13,DOCK9,EIF2AK2,ARID5B,ARL6IP5,DAB2IP,IFIT2,CASP8,FAS,ITGA1,LOC100139670,STARD8,BIRC3,RGS16,ARHGAP28,EGLN3,ID1,TNFSF10,RIPK1,IL7,PLEKHG1,TRIM38,ZFP36,FBXO7,PARP3,PMAIP1,PPP1R15B,RTKN2,DUSP16,PSMB9,SNX18,DAXX,HGF,LRP8,MAPRE3,NEDD9,BIRC2,MVP,EPHB2,SPRED1,LOC100298356,PML,TRIM14,PTPRJ,DENND2D,OAS1X,C3,TXNIP,SOCS…
GO:BP	regulation of defense response	GO:0031347	2.4111e-11	10.6178	355	1256	70	17231	NLRC5,SBNO2,PARP14,IRF7,SOCS3,DTX3L,PARP9,TRIM21,ADAR,STAT1,TLR4,RNF125,ZBP1,NMI,IFI16,CD47,SAMHD1,CGAS,LOC101905041,TNFRSF1A,LOC100139670,NT5E,RIPK1,ADA,ZFP36,PPARD,HERC5,HGF,LRP8,PVR,SEMA7A,CEBPB,C3,SOCS1,N4BP1,ISG15,LDLR,RICTOR,DUSP10,TBK1,RIPK2,NECTIN2,IL1R1,ITCH,TRAF3IP2,NAPEPLD,CYLD,FFAR4,DHX58,IL12A,EREG,NOD1,IFI35,ANXA1,SNX4,NLRX1,RB1,MAVS,TRIM44,ARG2,IL18RAP,PTPN2,SEC14L1,IRF3,TNFAIP3,RN…
GO:BP	cell death	GO:0008219	5.37206e-11	10.2699	1351	1256	174	17231	IRF1,CSF1,SOCS3,RNF122,ADAR,SLFN11,TLR4,GCLC,THBS1,BCL3,PHLDA1,CD74,ZBP1,EIF2AK2,ATF3,RRAS2,ARL6IP5,TGM2,MCL1,DAB2IP,IFIT2,AIFM2,CASP8,FAS,TNFRSF1A,BIRC3,EGLN3,TNFSF10,RIPK1,ADA,IL7,DYRK2,GOLPH3,ZFP36,FBXO7,PMAIP1,RTKN2,IFIT3,TNFRSF10D,PPARD,INHBA,XAF1,DAXX,HGF,LRP8,BIRC2,ZFP36L1,CASP7,CEBPB,PML,EMP1,BCL2L14,CASP4,ARL6IP1,GCLM,LTBR,KLF4,ETV6,KRT8,BFAR,JAK2,PPP1R13B,TIGAR,RFFL,AKAP1,ANO6,DCUN1D3,I…
GO:BP	programmed cell death	GO:0012501	6.04898e-11	10.2183	1259	1256	165	17231	IRF1,SOCS3,RNF122,ADAR,GCLC,THBS1,BCL3,PHLDA1,CD74,ZBP1,EIF2AK2,ATF3,ARL6IP5,TGM2,MCL1,DAB2IP,IFIT2,AIFM2,CASP8,FAS,TNFRSF1A,BIRC3,EGLN3,TNFSF10,RIPK1,ADA,IL7,DYRK2,GOLPH3,ZFP36,PMAIP1,RTKN2,IFIT3,TNFRSF10D,PPARD,INHBA,XAF1,DAXX,HGF,LRP8,BIRC2,ZFP36L1,CASP7,CEBPB,PML,BCL2L14,CASP4,ARL6IP1,GCLM,LTBR,KLF4,ETV6,KRT8,BFAR,JAK2,PPP1R13B,TIGAR,RFFL,AKAP1,ANO6,DCUN1D3,IL2RB,PTK2,CFLAR,ABL1,STXBP1,SHISA5…
GO:BP	regulation of cellular metabolic process	GO:0031323	6.82418e-11	10.1659	4888	1256	475	17231	IRF8,NLRC5,RNF19B,CIITA,IRF1,STAT3,SBNO2,PARP14,CSF1,ZNFX1,TRIM25,STAT2,IRF9,FST,IRF7,SOCS3,OAS1Y,DTX3L,TEAD4,TRIM21,TRIM16,ADAR,SLFN11,STAT1,TLR4,PNKD,GCLC,THBS1,BCL3,ZC3HAV1,CD74,ARHGEF5,EIF2AK2,DRAM1,ATP8B1,NMI,ATF3,ARID5B,MAFF,SMAD1,ATAD1,CGAS,ARL6IP5,NAMPT,MCL1,DAB2IP,CASP8,FAS,TNFRSF1A,ITGA1,BIRC3,EGLN3,SP110,ID1,TNFSF10,CARHSP1,RIPK1,KLF6,IL7,DYRK2,TRIM38,ZFP36,FBXO7,PARP3,BACH1,PMAIP1,PPP…
GO:BP	positive regulation of response to cytokine stimulus	GO:0060760	7.08436e-11	10.1497	44	1256	22	17231	NLRC5,PARP14,CSF1,IRF7,PARP9,TLR4,CD74,IFIH1,ZBP1,TICAM2,RIPK1,IL7,TBK1,HIF1A,EDN1,RIPK2,IL1R1,MAVS,TRIM44,IRF3,DHX9,MED1
GO:BP	protein modification by small protein conjugation	GO:0032446	7.83099e-11	10.1062	698	1256	108	17231	RNF19B,TRIM25,DTX3L,RNF122,TRIM21,UBA7,RNF125,IFIH1,NMI,VCPIP1,BIRC3,FBXO7,PCGF5,HERC5,DAXX,BIRC2,LOC509283,PML,SOCS1,TRIM34,STX1A,SENP2,WSB1,N4BP1,RNF114,BFAR,BCOR,ISG15,RFFL,RANBP2,DCUN1D3,PARP10,ABL1,TRIM5,FBXO30,RBCK1,XIAP,UBR1,KCTD10,BCL10,SH3RF2,DDX3X,INAVA,HIF1A,RIPK2,ITCH,SPRY2,LOC785873,WSB2,TRAF3IP2,TNKS,LOC616948,PELI1,PIAS2,RNF31,UHRF2,KLHL21,PJA2,MASTL,RNF141,TRIM36,NEURL3,PIAS1,JADE…
GO:BP	regulation of response to cytokine stimulus	GO:0060759	1.85125e-10	9.73253	102	1256	33	17231	NLRC5,PARP14,CSF1,IRF7,PARP9,ADAR,TLR4,CD74,IFIH1,ZBP1,SAMHD1,TICAM2,RIPK1,IL7,OTUD4,SOCS1,KLF4,ISG15,RFFL,TBK1,HIF1A,EDN1,RIPK2,IL1R1,CYLD,MAVS,TRIM44,PTPN2,IRF3,DHX9,CNOT7,MED1,RABGEF1
GO:BP	regulation of immune system process	GO:0002682	1.99505e-10	9.70005	950	1256	133	17231	NLRC5,IRF1,STAT3,PARP14,CSF1,IRF7,DTX3L,ICOSLG,PARP9,TRIM21,ADAR,STAT1,TLR4,THBS1,RNF125,CD74,ZBP1,NMI,IFI16,CD47,SAMHD1,CGAS,BOLA-DRA,DDX58,CASP8,LOC100139670,SDC4,TNFSF13B,TAPBPL,RIPK1,ADA,IL7,ZFP36,FBXO7,PARP3,ARID5A,CD274,INHBA,HERC5,LRP8,PLEKHA1,PVR,ZFP36L1,EPHB2,SEMA7A,CEBPB,LOC618733,PTPRJ,C3,SOCS1,TBX21,FCGR1A,PAG1,IL6ST,TNFSF9,N4BP1,UBASH3B,GPR108,ISG15,ANO6,PTK2,LDLR,ABL1,RBCK1,DUSP10,T…
GO:BP	regulation of primary metabolic process	GO:0080090	2.95681e-10	9.52918	4713	1256	458	17231	IRF8,NLRC5,RNF19B,CIITA,IRF1,STAT3,SBNO2,PARP14,CSF1,ZNFX1,TRIM25,STAT2,IRF9,FST,IRF7,SOCS3,OAS1Y,DTX3L,TEAD4,TRIM21,TRIM16,ADAR,STAT1,TLR4,PNKD,GCLC,THBS1,BCL3,ZC3HAV1,CD74,ARHGEF5,EIF2AK2,PDE3B,ATP8B1,NMI,ATF3,ARID5B,MAFF,SMAD1,CGAS,ARL6IP5,NAMPT,DAB2IP,CASP8,FAS,TNFRSF1A,ITGA1,BIRC3,EGLN3,SP110,ID1,TNFSF10,CARHSP1,RIPK1,KLF6,IL7,DYRK2,TRIM38,ZFP36,FBXO7,PARP3,BACH1,PMAIP1,PPP1R15B,ARID5A,RTKN2…
GO:BP	apoptotic process	GO:0006915	3.62087e-10	9.44119	1212	1256	158	17231	IRF1,SOCS3,RNF122,ADAR,GCLC,THBS1,BCL3,PHLDA1,CD74,EIF2AK2,ATF3,ARL6IP5,TGM2,MCL1,DAB2IP,IFIT2,AIFM2,CASP8,FAS,TNFRSF1A,BIRC3,EGLN3,TNFSF10,RIPK1,ADA,IL7,DYRK2,GOLPH3,ZFP36,PMAIP1,RTKN2,IFIT3,TNFRSF10D,PPARD,INHBA,XAF1,DAXX,HGF,LRP8,BIRC2,ZFP36L1,CASP7,CEBPB,PML,BCL2L14,CASP4,ARL6IP1,GCLM,LTBR,KLF4,ETV6,KRT8,BFAR,JAK2,PPP1R13B,TIGAR,RFFL,AKAP1,ANO6,DCUN1D3,IL2RB,PTK2,CFLAR,ABL1,STXBP1,SHISA5,SAV1…
GO:BP	regulation of catalytic activity	GO:0050790	4.47051e-10	9.34964	1783	1256	211	17231	NLRC5,STAT3,CSF1,OAS1Y,DTX3L,ADAR,TLR4,THBS1,CD74,ARHGEF5,STARD13,DOCK9,EIF2AK2,ARL6IP5,DAB2IP,CASP8,FAS,ITGA1,LOC100139670,STARD8,BIRC3,RGS16,ARHGAP28,EGLN3,TNFSF10,RIPK1,IL7,PLEKHG1,ZFP36,FBXO7,PARP3,PMAIP1,PPP1R15B,DUSP16,PSMB9,SNX18,DAXX,HGF,LRP8,MAPRE3,NEDD9,BIRC2,MVP,EPHB2,SPRED1,LOC100298356,PML,PTPRJ,DENND2D,OAS1X,C3,TXNIP,SOCS1,ARAP2,ARL6IP1,PSMB8,GCLM,ATP2B4,AZIN1,NMUR2,UBASH3B,KLF4,NUP…
GO:BP	phosphorylation	GO:0016310	6.16336e-10	9.21018	1581	1256	192	17231	NLRC5,STAT3,PARP14,CSF1,SOCS3,ADAR,ITPKC,TLR4,THBS1,CD74,ARHGEF5,CMPK2,EIF2AK2,SMAD1,DAB2IP,FAS,TNFRSF1A,RIPK1,IL7,DYRK2,FBXO7,PPP1R15B,DUSP16,CDK17,INHBA,DAXX,HGF,LRP8,MAPRE3,NEDD9,MVP,EPHB2,SEMA7A,SPRED1,PML,RNASEL,PTPRJ,C3,IPPK,SOCS1,TOP1,ATP2B4,IL6ST,STK32A,UBASH3B,NUP107,JAK2,GTF2H1,MAST4,TIGAR,SDCBP,SLC4A4,MORC3,RANBP2,RAP2A,TWF1,PTK2,ABL1,RICTOR,PRKAB1,AIDA,ITGA6,DUSP10,TBK1,LRRK1,TRIB2,BC…
GO:BP	positive regulation of intracellular signal transduction	GO:1902533	1.49254e-09	8.82607	701	1256	105	17231	CSF1,TRIM25,FAM110C,TRIM21,TLR4,THBS1,CD74,ARHGEF5,IFIT5,EIF2AK2,NMI,CGAS,ARL6IP5,MCL1,DAB2IP,CASP8,TNFRSF1A,TNFSF10,RIPK1,ADA,TMEM106A,TRIM38,GOLPH3,TIFA,PMAIP1,RTKN2,PPARD,HGF,SEMA7A,SPRED1,PTPRJ,TRIM34,SCHIP1,LTBR,RELL1,PTK2,CFLAR,ABL1,RICTOR,TRIM5,RBCK1,TBK1,LRRK1,BCL10,SH3RF2,DDX3X,INAVA,PUM1,MC1R,EDN1,IGFBP3,RIPK2,BCAR3,STK3,LURAP1L,SPRY2,ITGB1,MAP2K6,TRAF3IP2,CDON,USP15,SPAG9,LOC616948,F2R…
GO:BP	regulation of nitrogen compound metabolic process	GO:0051171	1.84337e-09	8.73439	4587	1256	444	17231	IRF8,NLRC5,RNF19B,CIITA,IRF1,STAT3,SBNO2,PARP14,CSF1,ZNFX1,TRIM25,STAT2,IRF9,FST,IRF7,SOCS3,OAS1Y,DTX3L,TEAD4,TRIM21,TRIM16,ADAR,STAT1,TLR4,PNKD,GCLC,THBS1,BCL3,ZC3HAV1,CD74,ARHGEF5,EIF2AK2,ATP8B1,NMI,ATF3,ARID5B,MAFF,SMAD1,CGAS,ARL6IP5,NAMPT,DAB2IP,CASP8,FAS,TNFRSF1A,ITGA1,BIRC3,EGLN3,SP110,ID1,TNFSF10,CARHSP1,RIPK1,TMEM106A,KLF6,IL7,TRIM38,ZFP36,FBXO7,PARP3,BACH1,PMAIP1,PPP1R15B,ARID5A,RTKN2,DU…
GO:BP	regulation of multicellular organismal process	GO:0051239	2.05083e-09	8.68807	1866	1256	216	17231	IRF8,IRF1,ADAMTS1,STAT3,CSF1,FST,IRF7,ICOSLG,TEAD4,TRIM16,STAT1,TLR4,THBS1,BCL3,RNF125,CD74,IFIH1,STARD13,EIF2AK2,PDE3B,NMI,CD47,MAFF,SMAD1,CGAS,LOC101905041,TGM2,BOLA-DRA,DAB2IP,CHSY1,TICAM2,DDX58,CASP8,TNFRSF1A,B4GALT5,RIPK1,ADA,TMEM106A,IL7,SOSTDC1,ZFP36,OAS2,FBXO7,PARP3,ARID5A,PPARD,INHBA,HGF,LRP8,ZFP36L1,EPHB2,SEMA7A,SPRED1,CEBPB,PML,SDHAF2,C3,SOCS1,TBX21,GBP5,STX1A,ATP2B4,IL6ST,PTGDR2,TNFSF…
GO:BP	macromolecule localization	GO:0033036	2.77304e-09	8.55704	2108	1256	237	17231	STAT3,TRIM25,DTX3L,TRIM21,TLR4,THBS1,CD74,ARHGEF5,ATP8B1,APOL3,LIMA1,RTP4,VCPIP1,ARL6IP5,TNFRSF1A,ATP9A,LOC100139670,LOC518495,LOC515697,RAB8B,GOLPH3,ZFP36,FBXO7,PARP3,LOC788334,ACSL5,CLTC,PPARD,LOC112443175,SNX18,INHBA,RAB20,VPS54,PLEKHA1,MAPRE3,SPP1,ZFP36L1,PML,LOC781710,ARFRP1,C3,TXNIP,NAPB,OSBPL3,GBP5,TRIM34,DESI1,STX1A,ARL6IP1,LRP10,MGAT3,SNX16,ZC3H11A,ATP2B4,STXBP3,NMUR2,SLC16A1,STX11,CMTM6…
GO:BP	cell cycle	GO:0007049	2.99327e-09	8.52385	1170	1256	151	17231	ADAMTS1,STAT3,TRIM21,SLFN11,KIF2C,DAB2IP,BIRC3,RIPK1,FBXO7,PARP3,BACH1,CLTC,CDK17,SNX18,INHBA,MAPRE3,BIRC2,ZFP36L1,PML,E2F8,ATP2B4,SLC16A1,MX2,KLF4,FOXJ3,EPS8,PPP1R13B,DCUN1D3,KIF11,FOXJ2,ABL1,E2F2,XIAP,DDX3X,PUM1,CTC1,EDN1,NUP214,KNL1,REC8,CRLF3,EIF2AK4,HSPA8,LOC100141266,SPRY2,ITGB1,GEM,MCIDAS,USP33,CENPE,CDK12,TNKS,ING2,ROCK2,ATM,CYLD,SVIL,UHRF2,KLHL21,IQGAP1,KIF18A,PDS5A,MASTL,CCNL1,EREG,GJA1…
GO:BP	cellular response to stress	GO:0033554	3.24996e-09	8.48812	1361	1256	169	17231	TRIM25,DTX3L,SLFN11,TLR4,UBA7,BCL3,CDKN2AIP,CD74,EIF2AK2,ATF3,VCPIP1,SAMHD1,CGAS,ARL6IP5,MCL1,DAB2IP,AIFM2,FAS,TNFRSF1A,EGLN3,RIPK1,DYRK2,ZFP36,SOD2,FBXO7,PARP3,BACH1,PMAIP1,PPP1R15B,PPARD,DAXX,HGF,PLEKHA1,ZFP36L1,SPRED1,CEBPB,PML,ZBTB38,EXO1,LTBR,RELL1,KLF4,NUP107,BFAR,GTF2H1,TIGAR,RAP2A,PARP10,ABL1,SHISA5,AIDA,DUSP10,XIAP,KDM2A,SH3RF2,PPP4R2,DDX3X,INAVA,TNC,MAGI3,MC1R,HIF1A,TRIB1,CTC1,KLF10,RIP…
GO:BP	macromolecule metabolic process	GO:0043170	4.13818e-09	8.38319	8374	1256	729	17231	IRF8,NLRC5,RNF19B,CIITA,IRF1,ADAMTS1,STAT3,SBNO2,PARP14,CSF1,ZNFX1,TRIM25,STAT2,IRF9,FST,IRF7,SOCS3,OAS1Y,DTX3L,RNF122,GTF2B,ICOSLG,PARP9,TEAD4,LAP3,TRIM21,TRIM16,ADAR,SLFN11,STAT1,TLR4,ISG20,GCLC,THBS1,UBA7,BCL3,PHLDA1,RNF125,ZC3HAV1,CD74,ARHGEF5,IFIH1,EIF2AK2,ATP8B1,NMI,APOL3,ATF3,ARID5B,PDP1,CD47,VCPIP1,SAMHD1,MAFF,SMAD1,ATAD1,CGAS,ARL6IP5,LOC101905041,NAMPT,TGM2,DAB2IP,CHSY1,PTPDC1,TICAM2,DDX…
GO:BP	regulation of protein modification process	GO:0031399	4.22823e-09	8.37384	1238	1256	157	17231	PARP14,CSF1,SOCS3,DTX3L,TRIM21,ADAR,TLR4,THBS1,CD74,ARHGEF5,EIF2AK2,NMI,DAB2IP,FAS,TNFRSF1A,ITGA1,BIRC3,RIPK1,IL7,FBXO7,PPP1R15B,ARID5A,DUSP16,INHBA,DAXX,HGF,LRP8,MAPRE3,NEDD9,BIRC2,MVP,EPHB2,SEMA7A,SPRED1,PML,PTPRJ,C3,OTUD4,SOCS1,SENP2,ATP2B4,IL6ST,N4BP1,UBASH3B,NUP107,BCOR,ISG15,SDCBP,DCUN1D3,RAP2A,TWF1,PTK2,PARP10,ABL1,RICTOR,AIDA,DUSP10,XIAP,LRRK1,BCL10,SH3RF2,PPP4R2,DDX3X,INAVA,HIF1A,TRIB1,E…
GO:BP	regulation of viral process	GO:0050792	4.50344e-09	8.34646	132	1256	36	17231	TRIM25,OAS1Y,TRIM21,MX1,ADAR,STAT1,ISG20,ZC3HAV1,CD74,IFIT5,EIF2AK2,LOC100139670,TRIM38,ZFP36,PVR,PML,RNASEL,TRIM14,OAS1X,TRIM34,N4BP1,ISG15,PARP10,TRIM5,DDX3X,NECTIN2,LOC785873,LOC616948,MAVS,PKN2,SRPK1,FMR1,DHX9,CNOT7,LOC516599,STAU1
GO:BP	protein phosphorylation	GO:0006468	5.35004e-09	8.27164	1337	1256	166	17231	PARP14,CSF1,SOCS3,ADAR,TLR4,THBS1,CD74,ARHGEF5,EIF2AK2,SMAD1,DAB2IP,FAS,TNFRSF1A,RIPK1,IL7,DYRK2,FBXO7,PPP1R15B,DUSP16,CDK17,INHBA,DAXX,HGF,LRP8,MAPRE3,NEDD9,MVP,EPHB2,SEMA7A,SPRED1,PML,RNASEL,PTPRJ,C3,SOCS1,TOP1,ATP2B4,IL6ST,STK32A,UBASH3B,NUP107,JAK2,GTF2H1,MAST4,SDCBP,MORC3,RAP2A,TWF1,PTK2,ABL1,RICTOR,PRKAB1,AIDA,DUSP10,TBK1,LRRK1,TRIB2,DDX3X,INAVA,TRIB1,EDN1,STK40,ADAM9,DUSP5,RIPK2,BCAR3,STK3…
GO:BP	protein ubiquitination	GO:0016567	6.43068e-09	8.19174	641	1256	97	17231	RNF19B,TRIM25,DTX3L,RNF122,TRIM21,UBA7,RNF125,NMI,VCPIP1,BIRC3,FBXO7,PCGF5,HERC5,DAXX,BIRC2,LOC509283,PML,SOCS1,TRIM34,SENP2,WSB1,N4BP1,RNF114,BFAR,BCOR,ISG15,RFFL,PARP10,ABL1,TRIM5,FBXO30,RBCK1,XIAP,UBR1,KCTD10,BCL10,SH3RF2,DDX3X,INAVA,RIPK2,ITCH,SPRY2,LOC785873,WSB2,TRAF3IP2,TNKS,LOC616948,PELI1,RNF31,UHRF2,KLHL21,PJA2,MASTL,RNF141,TRIM36,NEURL3,JADE2,RC3H2,LRRK2,OGT,ANKIB1,RYBP,TRIM44,TNKS2,HE…
GO:BP	regulation of immune response	GO:0050776	6.82404e-09	8.16596	521	1256	84	17231	NLRC5,IRF1,PARP14,IRF7,DTX3L,ICOSLG,PARP9,TRIM21,ADAR,STAT1,TLR4,RNF125,CD74,ZBP1,NMI,IFI16,SAMHD1,CGAS,BOLA-DRA,LOC100139670,TNFSF13B,ADA,PARP3,ARID5A,HERC5,LRP8,PLEKHA1,PVR,LOC618733,PTPRJ,C3,SOCS1,TBX21,FCGR1A,N4BP1,GPR108,ISG15,ABL1,RBCK1,DUSP10,TBK1,BCL10,C2,RIPK2,NECTIN2,IL1R1,FYB1,ITCH,TRAF3IP2,LOC107131209,MASP1,DHX58,IL12A,EREG,IFI35,MR1,RC3H2,ANXA1,SNX4,NLRX1,SPPL2A,MAVS,TRIM44,C1S,LOC7…
GO:BP	regulation of programmed cell death	GO:0043067	6.99564e-09	8.15517	1017	1256	135	17231	SOCS3,RNF122,ADAR,GCLC,THBS1,BCL3,PHLDA1,CD74,ZBP1,EIF2AK2,ATF3,ARL6IP5,TGM2,MCL1,DAB2IP,IFIT2,AIFM2,CASP8,FAS,TNFRSF1A,BIRC3,TNFSF10,RIPK1,ADA,IL7,GOLPH3,ZFP36,PMAIP1,RTKN2,IFIT3,TNFRSF10D,INHBA,DAXX,HGF,LRP8,BIRC2,ZFP36L1,CEBPB,PML,BCL2L14,CASP4,ARL6IP1,GCLM,LTBR,KLF4,BFAR,JAK2,TIGAR,RFFL,ANO6,DCUN1D3,IL2RB,PTK2,CFLAR,ABL1,STXBP1,SAV1,ITGA6,RBCK1,XIAP,DOCK8,BCL10,SIX1,SH3RF2,DDX3X,HIF1A,STK40,R…
GO:BP	positive regulation of cytokine-mediated signaling pathway	GO:0001961	7.27392e-09	8.13823	39	1256	19	17231	NLRC5,PARP14,CSF1,IRF7,PARP9,CD74,ZBP1,TICAM2,RIPK1,IL7,TBK1,HIF1A,EDN1,RIPK2,IL1R1,MAVS,TRIM44,IRF3,MED1
GO:BP	negative regulation of macromolecule metabolic process	GO:0010605	7.54757e-09	8.12219	2151	1256	239	17231	IRF8,CIITA,IRF1,STAT3,SBNO2,PARP14,ZNFX1,FST,SOCS3,DTX3L,PARP9,TRIM21,ADAR,SLFN11,TLR4,GCLC,THBS1,BCL3,RNF125,ZC3HAV1,EIF2AK2,ATP8B1,NMI,ATF3,ARID5B,CGAS,DAB2IP,BIRC3,ID1,CARHSP1,RIPK1,ZFP36,FBXO7,PARP3,BACH1,PPP1R15B,ARID5A,DUSP16,CLTC,PPARD,DAXX,HGF,BIRC2,MVP,ZFP36L1,EPHB2,SPRED1,LOC100298356,CEBPB,ZGPAT,PML,RNASEL,ZBTB38,PTPRJ,C3,TXNIP,SOCS1,TBX21,SP3,E2F8,ETS2,RFX5,SMG6,ARL6IP1,SENP2,DEPDC1,A…
GO:BP	positive regulation of cytokine production	GO:0001819	7.9219e-09	8.10117	314	1256	60	17231	IRF8,IRF1,STAT3,IRF7,TRIM16,STAT1,TLR4,THBS1,BCL3,CD74,IFIH1,EIF2AK2,CGAS,TICAM2,DDX58,CASP8,RIPK1,TMEM106A,IL7,OAS2,ARID5A,HGF,EPHB2,SEMA7A,CEBPB,C3,GBP5,ISG15,ABL1,TBK1,BCL10,DDX3X,INAVA,HIF1A,RIPK2,IL1R1,PELI1,IL17RC,DHX58,IL12A,PANX1,EREG,NOD1,GSDMD,ANXA1,MAVS,CD14,DDX21,POLR3A,TMF1,PDE4B,IRF3,DHX9,BRCA1,PTPN11,DENND1B,RNF135,AFAP1L2,RORA,CHI3L1
GO:BP	regulation of cell death	GO:0010941	1.388e-08	7.85761	1099	1256	142	17231	CSF1,SOCS3,RNF122,ADAR,SLFN11,TLR4,GCLC,THBS1,BCL3,PHLDA1,CD74,ZBP1,EIF2AK2,ATF3,RRAS2,ARL6IP5,TGM2,MCL1,DAB2IP,IFIT2,AIFM2,CASP8,FAS,TNFRSF1A,BIRC3,TNFSF10,RIPK1,ADA,IL7,GOLPH3,ZFP36,FBXO7,PMAIP1,RTKN2,IFIT3,TNFRSF10D,INHBA,DAXX,HGF,LRP8,BIRC2,ZFP36L1,CEBPB,PML,BCL2L14,CASP4,ARL6IP1,GCLM,LTBR,KLF4,BFAR,JAK2,TIGAR,RFFL,ANO6,DCUN1D3,IL2RB,PTK2,CFLAR,ABL1,STXBP1,SAV1,ITGA6,RBCK1,XIAP,DOCK8,BCL10,SI…
GO:BP	antigen processing and presentation	GO:0019882	1.59963e-08	7.79598	87	1256	28	17231	TAP1,THBS1,CD74,BOLA-DRB3,BOLA-DRA,BOLA-DMB,TAPBPL,RAB8B,LOC100848815,ERAP2,LOC618733,BLA-DQB,PSMB8,LOC616942,ERAP1,BOLA-DMA,BOLA,TAPBP,LOC512672,CTSS,BOLA-DQA5,NOD1,BOLA-NC1,PSME1,MR1,BOLA-DQA2,JSP.1,IDE
GO:BP	positive regulation of molecular function	GO:0044093	1.60247e-08	7.79521	1227	1256	154	17231	STAT3,CSF1,TRIM25,DTX3L,GTF2B,TRIM21,TLR4,THBS1,CD74,ARHGEF5,STARD13,EIF2AK2,ARID5B,ARL6IP5,DAB2IP,CASP8,FAS,ITGA1,STARD8,RGS16,ARHGAP28,EGLN3,TNFSF10,RIPK1,TRIM38,PMAIP1,PPP1R15B,RTKN2,SNX18,DAXX,HGF,LRP8,MAPRE3,NEDD9,EPHB2,PML,TRIM14,SOCS1,ARAP2,TRIM34,GCLM,ATP2B4,LARP6,NMUR2,KLF4,NUP107,PPRC1,TIGAR,RANBP2,PTK2,CFLAR,ABL1,RICTOR,SAV1,TRIM5,ITGA6,RBCK1,CTSS,DOCK8,BCL10,USP6NL,DDX3X,INAVA,HIF1A,A…
GO:BP	negative regulation of metabolic process	GO:0009892	1.61945e-08	7.79063	2328	1256	253	17231	IRF8,CIITA,IRF1,STAT3,SBNO2,PARP14,ZNFX1,FST,SOCS3,DTX3L,PARP9,TRIM21,ADAR,SLFN11,TLR4,GCLC,THBS1,BCL3,RNF125,ZC3HAV1,EIF2AK2,PDE3B,ATP8B1,NMI,ATF3,ARID5B,CGAS,MCL1,DAB2IP,BIRC3,ID1,CARHSP1,RIPK1,ZFP36,FBXO7,PARP3,BACH1,PPP1R15B,ARID5A,DUSP16,CLTC,PPARD,DAXX,HGF,BIRC2,MVP,ZFP36L1,EPHB2,SPRED1,LOC100298356,CEBPB,ZGPAT,PML,RNASEL,ZBTB38,PTPRJ,C3,TXNIP,SOCS1,TBX21,SP3,E2F8,ETS2,RFX5,SMG6,ARL6IP1,SEN…
GO:BP	regulation of apoptotic process	GO:0042981	1.89458e-08	7.72249	990	1256	131	17231	SOCS3,RNF122,ADAR,GCLC,THBS1,BCL3,PHLDA1,CD74,EIF2AK2,ATF3,ARL6IP5,TGM2,MCL1,DAB2IP,IFIT2,AIFM2,CASP8,FAS,TNFRSF1A,BIRC3,TNFSF10,RIPK1,ADA,IL7,GOLPH3,ZFP36,PMAIP1,RTKN2,IFIT3,TNFRSF10D,INHBA,DAXX,HGF,LRP8,BIRC2,ZFP36L1,CEBPB,PML,BCL2L14,CASP4,ARL6IP1,GCLM,LTBR,KLF4,BFAR,JAK2,TIGAR,RFFL,ANO6,DCUN1D3,IL2RB,PTK2,CFLAR,ABL1,STXBP1,SAV1,ITGA6,RBCK1,XIAP,DOCK8,BCL10,SIX1,SH3RF2,DDX3X,HIF1A,STK40,RIPK2,…
GO:BP	regulation of protein metabolic process	GO:0051246	2.11951e-08	7.67376	1990	1256	223	17231	RNF19B,STAT3,PARP14,CSF1,SOCS3,DTX3L,TRIM21,ADAR,TLR4,THBS1,BCL3,CD74,ARHGEF5,EIF2AK2,NMI,ARL6IP5,DAB2IP,CASP8,FAS,TNFRSF1A,ITGA1,BIRC3,EGLN3,TNFSF10,RIPK1,IL7,ZFP36,FBXO7,PMAIP1,PPP1R15B,ARID5A,DUSP16,PSMB9,INHBA,DAXX,HGF,LRP8,MAPRE3,NEDD9,BIRC2,MVP,ZFP36L1,EPHB2,SEMA7A,SPRED1,LOC100298356,PML,PTPRJ,C3,OTUD4,SOCS1,DESI1,ARL6IP1,PSMB8,SENP2,ATP2B4,AZIN1,IL6ST,LARP6,N4BP1,UBASH3B,KLF4,NUP107,LOC11…
GO:BP	regulation of gene expression	GO:0010468	2.17829e-08	7.66189	3845	1256	379	17231	IRF8,NLRC5,CIITA,IRF1,STAT3,SBNO2,PARP14,CSF1,ZNFX1,TRIM25,STAT2,IRF9,FST,IRF7,DTX3L,ICOSLG,PARP9,TEAD4,TRIM21,TRIM16,ADAR,STAT1,TLR4,GCLC,THBS1,BCL3,RNF125,ZC3HAV1,CD74,ARHGEF5,IFIH1,EIF2AK2,ATP8B1,NMI,ATF3,ARID5B,CD47,MAFF,SMAD1,CGAS,LOC101905041,NAMPT,DAB2IP,TICAM2,DDX58,CASP8,TNFRSF1A,SP110,ID1,CARHSP1,RIPK1,TMEM106A,KLF6,IL7,TRIM38,ZFP36,OAS2,PARP3,BACH1,PPP1R15B,ARID5A,RTKN2,CDK17,PPARD,PCG…
GO:BP	regulation of innate immune response	GO:0045088	2.89226e-08	7.53876	120	1256	33	17231	NLRC5,PARP14,IRF7,PARP9,TRIM21,ADAR,TLR4,ZBP1,NMI,IFI16,SAMHD1,CGAS,LRP8,PVR,SOCS1,N4BP1,ISG15,DUSP10,TBK1,NECTIN2,DHX58,IL12A,EREG,IFI35,NLRX1,MAVS,IL18RAP,PTPN2,IRF3,TNFAIP3,RNF135,CNOT7,MED1
GO:BP	regulation of response to external stimulus	GO:0032101	2.89685e-08	7.53807	610	1256	92	17231	NLRC5,SBNO2,PARP14,CSF1,IRF7,SOCS3,DTX3L,PARP9,TRIM21,ADAR,STAT1,TLR4,THBS1,RNF125,CD74,ZBP1,NMI,IFI16,CD47,SAMHD1,CGAS,LOC101905041,TNFRSF1A,LOC100139670,NT5E,RIPK1,ADA,ZFP36,PPARD,HERC5,HGF,LRP8,PVR,EPHB2,SEMA7A,CEBPB,C3,SOCS1,N4BP1,UBASH3B,KLF4,ISG15,ANO6,PTK2,LDLR,RICTOR,DUSP10,TBK1,PUM1,TRIB1,RIPK2,NECTIN2,IL1R1,ITCH,TRAF3IP2,USP15,NAPEPLD,CYLD,FFAR4,DHX58,IL12A,RTN4R,MET,EREG,NOD1,IFI35,ANX…
GO:BP	regulation of cytokine-mediated signaling pathway	GO:0001959	2.97728e-08	7.52618	95	1256	29	17231	NLRC5,PARP14,CSF1,IRF7,PARP9,ADAR,CD74,ZBP1,SAMHD1,TICAM2,RIPK1,IL7,OTUD4,SOCS1,ISG15,RFFL,TBK1,HIF1A,EDN1,RIPK2,IL1R1,CYLD,MAVS,TRIM44,PTPN2,IRF3,CNOT7,MED1,RABGEF1
GO:BP	regulation of cellular protein metabolic process	GO:0032268	3.59955e-08	7.44375	1865	1256	211	17231	RNF19B,STAT3,PARP14,CSF1,SOCS3,DTX3L,TRIM21,ADAR,TLR4,THBS1,BCL3,CD74,ARHGEF5,EIF2AK2,NMI,ARL6IP5,DAB2IP,CASP8,FAS,TNFRSF1A,ITGA1,BIRC3,EGLN3,TNFSF10,RIPK1,IL7,ZFP36,FBXO7,PMAIP1,PPP1R15B,ARID5A,DUSP16,INHBA,DAXX,HGF,LRP8,MAPRE3,NEDD9,BIRC2,MVP,ZFP36L1,EPHB2,SEMA7A,SPRED1,LOC100298356,PML,PTPRJ,C3,OTUD4,SOCS1,DESI1,ARL6IP1,SENP2,ATP2B4,IL6ST,LARP6,N4BP1,UBASH3B,KLF4,NUP107,LOC112441507,BCOR,ISG15…
GO:BP	positive regulation of I-kappaB kinase/NF-kappaB signaling	GO:0043123	3.70289e-08	7.43146	121	1256	33	17231	TRIM25,TRIM21,TLR4,CD74,IFIT5,CASP8,TNFRSF1A,TNFSF10,RIPK1,TMEM106A,TRIM38,TIFA,TRIM34,LTBR,CFLAR,ABL1,TRIM5,RBCK1,TBK1,BCL10,INAVA,RIPK2,LURAP1L,TRAF3IP2,LOC616948,PELI1,RNF31,NOD1,IRAK4,DDX21,AKAP13,LOC516599,IKBKB
GO:BP	cellular developmental process	GO:0048869	7.5209e-08	7.12373	2905	1256	299	17231	IRF8,IRF1,STAT3,SBNO2,CSF1,TUBB3,FST,SOCS3,ITGA2,TEAD4,TRIM16,ADAR,STAT1,TLR4,CYP24A1,BCL3,CD74,FLNB,EIF2AK2,ATP8B1,ATF3,ARID5B,MAFF,SMAD1,CGAS,TGM2,BOLA-DRA,MCL1,DAB2IP,CASP8,TNFRSF1A,NHS,B4GALT5,ID1,SDC4,TNFSF13B,RIPK1,ADA,IL7,SOSTDC1,ZFP36,FBXO7,ARID5A,PPARD,INHBA,HS6ST1,LRP8,PLEKHA1,NEDD9,PVR,ZFP36L1,EPHB2,SEMA7A,SPRED1,CEBPB,PML,RNASEL,SDHAF2,C3,TXNIP,NHSL1,TCAF2,SOCS1,TBX21,SP3,E2F8,BATF2,S…
GO:BP	cell surface receptor signaling pathway	GO:0007166	7.65768e-08	7.1159	2108	1256	231	17231	NLRC5,IRF1,STAT3,PARP14,CSF1,STAT2,IL15RA,TUBB3,FST,IRF7,SOCS3,IFNAR2,ITGA2,DTX3L,ICOSLG,PARP9,MX1,ADAR,STAT1,TLR4,THBS1,BCL3,CD74,ZBP1,NMI,ATF3,ARID5B,SAMHD1,SMAD1,MCL1,DAB2IP,PTPDC1,TICAM2,CASP8,FAS,TNFRSF1A,ITGA1,OSMR,TNFSF10,TNFSF13B,RIPK1,ADA,BTBD11,IL7,SOSTDC1,DYRK2,OAS2,PMAIP1,CD274,TNFRSF10D,IL4R,INHBA,PLEKHA4,HGF,LRP8,PLEKHA1,NEDD9,PVR,MVP,TNS2,EPHB2,SEMA7A,SPRED1,VIPR2,PML,SDHAF2,PTPRJ,…
GO:BP	regulation of viral life cycle	GO:1903900	8.79571e-08	7.05573	118	1256	32	17231	TRIM25,OAS1Y,TRIM21,MX1,ADAR,ISG20,ZC3HAV1,CD74,IFIT5,EIF2AK2,LOC100139670,TRIM38,PVR,PML,RNASEL,OAS1X,TRIM34,N4BP1,ISG15,PARP10,TRIM5,DDX3X,NECTIN2,LOC785873,LOC616948,MAVS,PKN2,SRPK1,FMR1,CNOT7,LOC516599,STAU1
GO:BP	cellular protein metabolic process	GO:0044267	8.8596e-08	7.05259	4258	1256	409	17231	RNF19B,STAT3,PARP14,CSF1,TRIM25,SOCS3,DTX3L,RNF122,GTF2B,PARP9,TRIM21,TRIM16,ADAR,TLR4,THBS1,UBA7,BCL3,RNF125,CD74,ARHGEF5,IFIH1,EIF2AK2,NMI,PDP1,VCPIP1,SMAD1,ARL6IP5,TGM2,DAB2IP,PTPDC1,CASP8,FAS,TNFRSF1A,ITGA1,BIRC3,EGLN3,B4GALT5,TNFSF10,USP18,RIPK1,IL7,DYRK2,PSMB10,ZFP36,FBXO7,PARP3,PMAIP1,PPP1R15B,ARID5A,DUSP16,CDK17,PSMB9,PARP8,PCGF5,INHBA,HERC5,DAXX,HGF,LRP8,MAPRE3,NEDD9,BIRC2,MVP,ZFP36L1,TN…
GO:BP	cellular macromolecule metabolic process	GO:0044260	1.0486e-07	6.97939	7029	1256	622	17231	IRF8,NLRC5,RNF19B,CIITA,IRF1,STAT3,SBNO2,PARP14,CSF1,ZNFX1,TRIM25,STAT2,IRF9,FST,IRF7,SOCS3,DTX3L,RNF122,GTF2B,PARP9,TEAD4,TRIM21,TRIM16,ADAR,SLFN11,STAT1,TLR4,ISG20,GCLC,THBS1,UBA7,BCL3,PHLDA1,RNF125,ZC3HAV1,CD74,ARHGEF5,IFIH1,EIF2AK2,ATP8B1,NMI,ATF3,ARID5B,PDP1,VCPIP1,SAMHD1,MAFF,SMAD1,ATAD1,CGAS,ARL6IP5,NAMPT,TGM2,DAB2IP,CHSY1,PTPDC1,CASP8,FAS,TNFRSF1A,ITGA1,BIRC3,EGLN3,B4GALT5,CDADC1,SP110,ID…
GO:BP	regulation of I-kappaB kinase/NF-kappaB signaling	GO:0043122	1.24265e-07	6.90565	168	1256	39	17231	TRIM25,TRIM21,STAT1,TLR4,CD74,IFIT5,DAB2IP,CASP8,TNFRSF1A,TNFSF10,RIPK1,TMEM106A,TRIM38,TIFA,TRIM34,LTBR,CFLAR,ABL1,TRIM5,RBCK1,TBK1,BCL10,INAVA,RIPK2,LURAP1L,HDAC1,TRAF3IP2,LOC616948,PELI1,RNF31,NOD1,NLRX1,IRAK4,DDX21,AKAP13,TNFAIP3,LOC516599,RORA,IKBKB
GO:BP	cellular catabolic process	GO:0044248	1.64721e-07	6.78325	1626	1256	187	17231	RNF19B,STAT3,TRIM25,DTX3L,RNF122,TRIM21,CYP24A1,PNKD,ISG20,UBA7,RNF125,ZC3HAV1,DRAM1,LIPH,SAMHD1,MCL1,DAB2IP,CASP8,CDADC1,NT5E,CARHSP1,USP18,RIPK1,ADA,GABARAPL1,PSMB10,ZFP36,FBXO7,PMAIP1,PPARD,PSMB9,ZFP36L1,PML,RNASEL,OAT,DRAM2,TBX21,LGALS8,TRIM34,DESI1,SMG6,FBXL14,PSMB8,ERAP1,ATP2B4,N4BP1,RNF114,RAB33B,TRAPPC8,FITM2,BFAR,ISG15,XRN2,TIGAR,RFFL,SLC4A4,LDLR,SPTLC2,KCTD6,EHHADH,TRIM5,RBCK1,TBK1,CTSS…
GO:BP	response to stimulus	GO:0050896	1.79569e-07	6.74577	7587	1256	662	17231	IRF8,NLRC5,RNF19B,TAP1,CIITA,LOC512486,IRF1,LOC511531,STAT3,SBNO2,PARP14,CSF1,TRIM25,FAM110C,STAT2,IL15RA,TUBB3,FST,IRF7,SOCS3,IFNAR2,ITGA2,OAS1Y,DTX3L,LOC507055,ICOSLG,PARP9,PLCH1,TEAD4,TRIM21,TRIM16,MX1,ADAR,SLFN11,STAT1,TLR4,CYP24A1,ISG20,GCLC,THBS1,UBA7,BCL3,RNF125,ZC3HAV1,CDKN2AIP,CD74,ARHGEF5,IFIH1,STARD13,CMPK2,ZBP1,DOCK9,IFIT5,EIF2AK2,PDE3B,CISH,GBP4,ATP8B1,NMI,ATF3,BOLA-DRB3,ARID5B,IFI16…
GO:BP	negative regulation of response to stimulus	GO:0048585	2.0152e-07	6.69568	1172	1256	145	17231	NLRC5,PARP14,FST,SOCS3,TRIM21,ADAR,STAT1,TLR4,THBS1,BCL3,RNF125,CD74,PDE3B,NMI,ATF3,SAMHD1,CGAS,ARL6IP5,MCL1,DAB2IP,CASP8,TNFRSF1A,ITGA1,RGS16,NT5E,RIPK1,ADA,IL7,SOSTDC1,DYRK2,ZFP36,PARP3,PPP1R15B,RTKN2,DUSP16,PPARD,HGF,PLEKHA1,MVP,TNS2,EPHB2,SEMA7A,SPRED1,SDHAF2,PTPRJ,OTUD4,SOCS1,TBX21,GCLM,ATP2B4,UBASH3B,KLF4,BFAR,GPR108,ISG15,CD2AP,RFFL,LDLR,KCTD6,CFLAR,ABL1,AIDA,ITGA6,DUSP10,UBR1,KCTD10,DDX3X…
GO:BP	I-kappaB kinase/NF-kappaB signaling	GO:0007249	2.06981e-07	6.68407	193	1256	42	17231	TRIM25,TRIM21,STAT1,TLR4,BCL3,CD74,IFIT5,DAB2IP,CASP8,TNFRSF1A,TNFSF10,RIPK1,TMEM106A,TRIM38,TIFA,TRIM34,LTBR,CFLAR,ABL1,TRIM5,RBCK1,TBK1,BCL10,INAVA,RIPK2,LURAP1L,HDAC1,TRAF3IP2,LOC616948,ROCK2,PELI1,RNF31,NOD1,NLRX1,IRAK4,DDX21,AKAP13,TBKBP1,TNFAIP3,LOC516599,RORA,IKBKB
GO:BP	positive regulation of protein metabolic process	GO:0051247	2.14815e-07	6.66794	1120	1256	140	17231	RNF19B,STAT3,PARP14,CSF1,TLR4,THBS1,BCL3,CD74,ARHGEF5,EIF2AK2,NMI,ARL6IP5,DAB2IP,CASP8,FAS,TNFRSF1A,ITGA1,BIRC3,EGLN3,TNFSF10,RIPK1,PMAIP1,PPP1R15B,ARID5A,INHBA,DAXX,HGF,LRP8,MAPRE3,NEDD9,BIRC2,SEMA7A,PML,C3,SOCS1,SENP2,ATP2B4,IL6ST,LARP6,KLF4,NUP107,SDCBP,DCUN1D3,RAP2A,PTK2,LDLR,CFLAR,ABL1,RICTOR,XIAP,LRRK1,TRIB2,BCL10,SH3RF2,DDX3X,INAVA,TRIB1,EDN1,ADAM9,RIPK2,BCAR3,STK3,ITCH,SPRY2,STRADB,MAP2K6…
GO:BP	positive regulation of interferon-beta production	GO:0032728	2.434e-07	6.61368	28	1256	15	17231	IRF1,IRF7,TLR4,IFIH1,DDX58,OAS2,TBK1,DDX3X,DHX58,MAVS,POLR3A,IRF3,DHX9,PTPN11,RNF135
GO:BP	organic substance metabolic process	GO:0071704	2.44774e-07	6.61123	9746	1256	817	17231	IRF8,NLRC5,RNF19B,CIITA,IRF1,ADAMTS1,STAT3,SBNO2,PARP14,CSF1,ZNFX1,TRIM25,STAT2,IRF9,FST,IRF7,SOCS3,OAS1Y,DTX3L,RNF122,GTF2B,ICOSLG,PARP9,PLCH1,TEAD4,LAP3,TRIM21,TRIM16,ADAR,SLFN11,ITPKC,STAT1,TLR4,CYP24A1,PNKD,ISG20,GCLC,THBS1,UBA7,BCL3,PHLDA1,RNF125,ZC3HAV1,CD74,ARHGEF5,IFIH1,CMPK2,EIF2AK2,PDE3B,ATP8B1,NMI,APOL3,ATF3,ARID5B,LIPH,PDP1,CD47,VCPIP1,SAMHD1,MAFF,SMAD1,ATAD1,CGAS,ARL6IP5,LOC101905041…
GO:BP	regulation of biological process	GO:0050789	2.92148e-07	6.5344	10380	1256	861	17231	IRF8,NLRC5,RNF19B,CIITA,IRF1,ADAMTS1,STAT3,SBNO2,PARP14,CSF1,ZNFX1,TRIM25,FAM110C,STAT2,IL15RA,TUBB3,IRF9,FST,IRF7,SOCS3,IFNAR2,ITGA2,OAS1Y,DTX3L,RNF122,ICOSLG,PARP9,PLCH1,TEAD4,TRIM21,TRIM16,MX1,ADAR,SLFN11,STAT1,TLR4,PNKD,ISG20,GCLC,THBS1,BCL3,PHLDA1,RNF125,ZC3HAV1,CDKN2AIP,CD74,ARHGEF5,IFIH1,STARD13,ZBP1,DOCK9,IFIT5,EIF2AK2,PDE3B,CISH,DRAM1,ATP8B1,NMI,ATF3,ARID5B,IFI16,LIMA1,CD47,VCPIP1,RRAS2,…
GO:BP	cell differentiation	GO:0030154	3.10284e-07	6.50824	2845	1256	291	17231	IRF8,IRF1,STAT3,SBNO2,CSF1,TUBB3,FST,SOCS3,ITGA2,TEAD4,TRIM16,ADAR,STAT1,TLR4,CYP24A1,BCL3,CD74,FLNB,EIF2AK2,ATP8B1,ATF3,ARID5B,MAFF,SMAD1,TGM2,BOLA-DRA,MCL1,DAB2IP,CASP8,TNFRSF1A,NHS,B4GALT5,ID1,SDC4,TNFSF13B,RIPK1,ADA,IL7,SOSTDC1,ZFP36,FBXO7,ARID5A,PPARD,INHBA,HS6ST1,LRP8,PLEKHA1,NEDD9,PVR,ZFP36L1,EPHB2,SEMA7A,SPRED1,CEBPB,PML,RNASEL,SDHAF2,C3,TXNIP,NHSL1,TCAF2,SOCS1,TBX21,SP3,E2F8,BATF2,SLC4A7…
GO:BP	phosphorus metabolic process	GO:0006793	3.27839e-07	6.48434	2396	1256	253	17231	NLRC5,STAT3,PARP14,CSF1,SOCS3,ADAR,ITPKC,TLR4,THBS1,CD74,ARHGEF5,CMPK2,EIF2AK2,NT5DC3,PDP1,PPA1,SAMHD1,SMAD1,NAMPT,DAB2IP,PTPDC1,FAS,TNFRSF1A,ITGA1,NT5E,RIPK1,ADA,UMPS,IL7,DYRK2,FBXO7,PPP1R15B,ACSL5,DUSP16,CDK17,INHBA,DAXX,HGF,LRP8,MAPRE3,NEDD9,MVP,TNS2,EPHB2,SEMA7A,SPRED1,PML,RNASEL,PGS1,SDHAF2,PTPRJ,C3,IPPK,SOCS1,SGMS1,MBOAT1,PTPN13,TOP1,ATP2B4,IL6ST,STK32A,UBASH3B,NUP107,FITM2,JAK2,GTF2H1,MAST…
GO:BP	negative regulation of cell communication	GO:0010648	3.41346e-07	6.4668	970	1256	125	17231	NLRC5,PARP14,FST,SOCS3,ADAR,STAT1,TLR4,PNKD,THBS1,BCL3,RNF125,CD74,PDE3B,NMI,ATF3,SAMHD1,ATAD1,MCL1,DAB2IP,CASP8,ITGA1,RGS16,RIPK1,ADA,IL7,SOSTDC1,DYRK2,RTKN2,DUSP16,HGF,PLEKHA1,MVP,TNS2,EPHB2,SPRED1,SDHAF2,PTPRJ,OTUD4,SOCS1,GCLM,ATP2B4,UBASH3B,BFAR,GPR108,ISG15,CD2AP,RFFL,KCTD6,CFLAR,ABL1,STXBP1,AIDA,ITGA6,DUSP10,UBR1,KCTD10,DDX3X,HIF1A,TRIB1,ARHGAP24,DUSP5,ASXL1,STK3,HDAC1,ITCH,SPRY2,IRS1,STRAD…
GO:BP	negative regulation of signaling	GO:0023057	4.17056e-07	6.37981	973	1256	125	17231	NLRC5,PARP14,FST,SOCS3,ADAR,STAT1,TLR4,PNKD,THBS1,BCL3,RNF125,CD74,PDE3B,NMI,ATF3,SAMHD1,ATAD1,MCL1,DAB2IP,CASP8,ITGA1,RGS16,RIPK1,ADA,IL7,SOSTDC1,DYRK2,RTKN2,DUSP16,HGF,PLEKHA1,MVP,TNS2,EPHB2,SPRED1,SDHAF2,PTPRJ,OTUD4,SOCS1,GCLM,ATP2B4,UBASH3B,BFAR,GPR108,ISG15,CD2AP,RFFL,KCTD6,CFLAR,ABL1,STXBP1,AIDA,ITGA6,DUSP10,UBR1,KCTD10,DDX3X,HIF1A,TRIB1,ARHGAP24,DUSP5,ASXL1,STK3,HDAC1,ITCH,SPRY2,IRS1,STRAD…
GO:BP	cellular component organization	GO:0016043	4.26009e-07	6.37058	5004	1256	464	17231	ADAMTS1,ZNFX1,FAM110C,TUBB3,DTX3L,GTF2B,TRIM16,ADAR,TLR4,THBS1,BCL3,CDKN2AIP,CD74,ARHGEF5,STARD13,CNN3,FLNB,EIF2AK2,ATP8B1,LIMA1,RTP4,VCPIP1,SAMHD1,SMAD1,ATAD1,KIF2C,BOLA-DRA,DAB2IP,PTPDC1,AIFM2,TNFRSF1A,ATP9A,STARD8,ARHGAP28,CLDN1,B4GALT5,TNFSF10,SDC4,TAPBPL,RIPK1,RAB8B,GOLPH3,RHOBTB3,TIFA,FBXO7,PARP3,PMAIP1,ARID5A,CLTC,PCGF5,SNX18,INHBA,RAB20,VPS54,DAXX,HGF,LRP8,PLEKHA1,MAPRE3,NEDD9,PVR,EPHB2,S…
GO:BP	biological regulation	GO:0065007	4.31501e-07	6.36502	11045	1256	906	17231	IRF8,NLRC5,RNF19B,CIITA,IRF1,ADAMTS1,STAT3,SBNO2,PARP14,CSF1,ZNFX1,TRIM25,FAM110C,STAT2,IL15RA,TUBB3,IRF9,FST,IRF7,SOCS3,IFNAR2,ITGA2,OAS1Y,DTX3L,RNF122,GTF2B,ICOSLG,PARP9,PLCH1,TEAD4,TRIM21,TRIM16,MX1,ADAR,SLFN11,STAT1,TLR4,PNKD,ISG20,GCLC,THBS1,BCL3,PHLDA1,RNF125,ZC3HAV1,CDKN2AIP,CD74,ARHGEF5,IFIH1,STARD13,ZBP1,DOCK9,IFIT5,EIF2AK2,PDE3B,CISH,DRAM1,ATP8B1,NMI,ATF3,ARID5B,IFI16,LIMA1,CD47,VCPIP1,…
GO:BP	regulation of extrinsic apoptotic signaling pathway	GO:2001236	4.94016e-07	6.30626	112	1256	30	17231	THBS1,ATF3,MCL1,TNFSF10,RIPK1,IL7,PMAIP1,INHBA,HGF,PML,GCLM,LTBR,RFFL,CFLAR,ITGA6,RBCK1,BCL10,DDX3X,STK3,STRADB,CYLD,SGK3,GSK3B,ITGAV,YAP1,FEM1B,TNFAIP3,BMPR1B,PHIP,BRCA1
GO:BP	phosphate-containing compound metabolic process	GO:0006796	5.04035e-07	6.29754	2371	1256	250	17231	NLRC5,STAT3,PARP14,CSF1,SOCS3,ADAR,ITPKC,TLR4,THBS1,CD74,ARHGEF5,CMPK2,EIF2AK2,NT5DC3,PDP1,PPA1,SAMHD1,SMAD1,NAMPT,DAB2IP,PTPDC1,FAS,TNFRSF1A,ITGA1,NT5E,RIPK1,ADA,UMPS,IL7,DYRK2,FBXO7,PPP1R15B,ACSL5,DUSP16,CDK17,INHBA,DAXX,HGF,LRP8,MAPRE3,NEDD9,MVP,TNS2,EPHB2,SEMA7A,SPRED1,PML,RNASEL,PGS1,SDHAF2,PTPRJ,C3,IPPK,SOCS1,SGMS1,MBOAT1,PTPN13,TOP1,ATP2B4,IL6ST,STK32A,UBASH3B,NUP107,FITM2,JAK2,GTF2H1,MAST…
GO:BP	extrinsic apoptotic signaling pathway	GO:0097191	5.45356e-07	6.26332	176	1256	39	17231	THBS1,ATF3,MCL1,DAB2IP,CASP8,FAS,TNFSF10,RIPK1,IL7,PMAIP1,TNFRSF10D,INHBA,HGF,PML,GCLM,LTBR,KRT8,RFFL,CFLAR,ITGA6,RBCK1,BCL10,DDX3X,KRT18,STK3,STRADB,CYLD,SGK3,IL12A,GSK3B,ITGAV,YAP1,BAG3,FEM1B,BCL2L11,TNFAIP3,BMPR1B,PHIP,BRCA1
GO:BP	regulation of catabolic process	GO:0009894	6.43741e-07	6.19129	675	1256	95	17231	RNF19B,STAT3,DTX3L,TRIM21,ZC3HAV1,PDE3B,DRAM1,MCL1,DAB2IP,CARHSP1,ZFP36,FBXO7,ZFP36L1,PML,RNASEL,DRAM2,TRIM34,DESI1,ATP2B4,AZIN1,N4BP1,TIGAR,SLC4A4,LDLR,SPTLC2,TRIM5,TBK1,TRIB2,SH3RF2,PUM1,HIF1A,TRIB1,RIPK2,PNPT1,ITCH,IRS1,ITGB1,TRAF3IP2,USP33,LOC616948,ATM,MOV10,C8H9ORF72,GSK3B,NOD1,WDR24,PSME1,PIAS1,PIK3C2A,ZFP36L2,RC3H2,PRKAA2,LRRK2,OGT,ANKIB1,RYBP,EGFR,EIF4G2,RASIP1,FYCO1,SMG1,CALCOCO2,HDAC4,…
GO:BP	mitotic cell cycle	GO:0000278	7.35058e-07	6.13368	657	1256	93	17231	ADAMTS1,SLFN11,KIF2C,RIPK1,FBXO7,PARP3,BACH1,CLTC,CDK17,SNX18,INHBA,ZFP36L1,PML,E2F8,KLF4,EPS8,DCUN1D3,KIF11,ABL1,DDX3X,CTC1,EDN1,REC8,CRLF3,LOC100141266,SPRY2,ITGB1,GEM,MCIDAS,CENPE,TNKS,CYLD,IQGAP1,KIF18A,PDS5A,MASTL,EREG,GJA1,TRIM36,TMOD3,ECT2,SBDS,PSME1,CEP55,ZFP36L2,NEK6,MYH10,ANXA1,ANLN,DLGAP5,KIF27,KMT2E,MITD1,EML4,NCAPH,NACC2,INO80,GPSM2,EGFR,USP37,RB1,KIF23,SPDYA,ATAD5,PKN2,DYNC1H1,CTDSP…
GO:BP	positive regulation of cellular protein metabolic process	GO:0032270	8.28391e-07	6.08176	1057	1256	132	17231	RNF19B,STAT3,PARP14,CSF1,TLR4,THBS1,BCL3,CD74,ARHGEF5,EIF2AK2,NMI,ARL6IP5,DAB2IP,CASP8,FAS,TNFRSF1A,ITGA1,BIRC3,EGLN3,TNFSF10,RIPK1,PMAIP1,PPP1R15B,ARID5A,INHBA,DAXX,HGF,LRP8,MAPRE3,NEDD9,BIRC2,SEMA7A,PML,C3,SOCS1,SENP2,ATP2B4,IL6ST,LARP6,KLF4,NUP107,SDCBP,DCUN1D3,RAP2A,PTK2,LDLR,CFLAR,ABL1,RICTOR,XIAP,LRRK1,TRIB2,BCL10,SH3RF2,DDX3X,INAVA,TRIB1,EDN1,ADAM9,RIPK2,BCAR3,STK3,SPRY2,STRADB,MAP2K6,CENP…
GO:BP	interferon-beta production	GO:0032608	9.10405e-07	6.04077	39	1256	17	17231	IRF1,IRF7,TLR4,IFIH1,NMI,DDX58,OAS2,TBK1,DDX3X,DHX58,NLRX1,MAVS,POLR3A,IRF3,DHX9,PTPN11,RNF135
GO:BP	regulation of interferon-beta production	GO:0032648	9.10405e-07	6.04077	39	1256	17	17231	IRF1,IRF7,TLR4,IFIH1,NMI,DDX58,OAS2,TBK1,DDX3X,DHX58,NLRX1,MAVS,POLR3A,IRF3,DHX9,PTPN11,RNF135
GO:BP	metabolic process	GO:0008152	1.08875e-06	5.96307	10242	1256	848	17231	IRF8,NLRC5,RNF19B,CIITA,IRF1,ADAMTS1,STAT3,SBNO2,PARP14,CSF1,ZNFX1,TRIM25,STAT2,IRF9,FST,IRF7,SOCS3,OAS1Y,DTX3L,RNF122,GTF2B,ICOSLG,PARP9,PLCH1,TEAD4,LAP3,TRIM21,TRIM16,ADAR,SLFN11,ITPKC,STAT1,TLR4,CYP24A1,PNKD,ISG20,GCLC,THBS1,UBA7,BCL3,PHLDA1,RNF125,ZC3HAV1,CD74,ARHGEF5,IFIH1,CMPK2,EIF2AK2,PDE3B,NT5DC3,DRAM1,ATP8B1,NMI,APOL3,ATF3,ARID5B,LIPH,PDP1,PPA1,CD47,VCPIP1,SAMHD1,MAFF,SMAD1,ATAD1,CGAS,AR…
GO:BP	catabolic process	GO:0009056	1.20891e-06	5.91761	1904	1256	208	17231	RNF19B,STAT3,TRIM25,DTX3L,RNF122,PLCH1,TRIM21,CYP24A1,PNKD,ISG20,UBA7,RNF125,ZC3HAV1,PDE3B,DRAM1,LIPH,SAMHD1,MCL1,DAB2IP,CASP8,CDADC1,NT5E,CARHSP1,USP18,RIPK1,ADA,GABARAPL1,PSMB10,ZFP36,FBXO7,PMAIP1,PPARD,PSMB9,SPP1,ZFP36L1,PML,RNASEL,SAT1,OAT,DRAM2,TBX21,LGALS8,TRIM34,DESI1,SMG6,FBXL14,PSMB8,ERAP1,ATP2B4,AZIN1,N4BP1,RNF114,RAB33B,TRAPPC8,FITM2,BFAR,ISG15,XRN2,TIGAR,RFFL,SLC4A4,LDLR,SPTLC2,KCTD6,…
GO:BP	negative regulation of signal transduction	GO:0009968	1.26621e-06	5.8975	917	1256	118	17231	NLRC5,PARP14,FST,SOCS3,ADAR,STAT1,TLR4,THBS1,BCL3,RNF125,CD74,PDE3B,NMI,ATF3,SAMHD1,MCL1,DAB2IP,CASP8,ITGA1,RGS16,RIPK1,ADA,IL7,SOSTDC1,DYRK2,RTKN2,DUSP16,HGF,PLEKHA1,MVP,TNS2,EPHB2,SPRED1,SDHAF2,PTPRJ,OTUD4,SOCS1,GCLM,ATP2B4,UBASH3B,BFAR,GPR108,ISG15,CD2AP,RFFL,KCTD6,CFLAR,ABL1,AIDA,ITGA6,DUSP10,UBR1,KCTD10,DDX3X,HIF1A,TRIB1,ARHGAP24,DUSP5,ASXL1,STK3,HDAC1,ITCH,SPRY2,STRADB,ITGB1,ING2,ATM,CHP1,C…
GO:BP	type I interferon production	GO:0032606	1.29154e-06	5.88889	66	1256	22	17231	IRF8,IRF1,IRF7,STAT1,TLR4,RNF125,IFIH1,NMI,CGAS,DDX58,OAS2,TBK1,DDX3X,DHX58,NLRX1,MAVS,CD14,POLR3A,IRF3,DHX9,PTPN11,RNF135
GO:BP	regulation of type I interferon production	GO:0032479	1.29154e-06	5.88889	66	1256	22	17231	IRF8,IRF1,IRF7,STAT1,TLR4,RNF125,IFIH1,NMI,CGAS,DDX58,OAS2,TBK1,DDX3X,DHX58,NLRX1,MAVS,CD14,POLR3A,IRF3,DHX9,PTPN11,RNF135
GO:BP	antigen processing and presentation of endogenous peptide antigen	GO:0002483	1.33264e-06	5.87529	19	1256	12	17231	TAP1,BOLA-DRA,ERAP2,LOC618733,LOC616942,ERAP1,BOLA,TAPBP,LOC512672,BOLA-NC1,JSP.1,IDE
GO:BP	regulation of cellular catabolic process	GO:0031329	1.81819e-06	5.74036	561	1256	82	17231	RNF19B,STAT3,DTX3L,TRIM21,ZC3HAV1,DRAM1,MCL1,DAB2IP,CARHSP1,ZFP36,FBXO7,ZFP36L1,PML,RNASEL,DRAM2,TRIM34,DESI1,ATP2B4,N4BP1,TIGAR,SLC4A4,LDLR,SPTLC2,TRIM5,TBK1,TRIB2,SH3RF2,PUM1,HIF1A,TRIB1,RIPK2,PNPT1,ITCH,IRS1,TRAF3IP2,USP33,LOC616948,ATM,MOV10,C8H9ORF72,GSK3B,NOD1,WDR24,PSME1,PIAS1,PIK3C2A,ZFP36L2,RC3H2,PRKAA2,LRRK2,OGT,ANKIB1,RYBP,EIF4G2,RASIP1,FYCO1,SMG1,CALCOCO2,MSN,SH3GLB1,STYX,VPS13C,FMR1,…
GO:BP	positive regulation of multicellular organismal process	GO:0051240	1.97476e-06	5.70448	976	1256	123	17231	IRF8,IRF1,STAT3,CSF1,FST,IRF7,TEAD4,TRIM16,STAT1,TLR4,THBS1,BCL3,CD74,IFIH1,EIF2AK2,SMAD1,CGAS,TGM2,BOLA-DRA,TICAM2,DDX58,CASP8,B4GALT5,RIPK1,ADA,TMEM106A,IL7,OAS2,ARID5A,INHBA,HGF,LRP8,ZFP36L1,EPHB2,SEMA7A,CEBPB,C3,SOCS1,TBX21,GBP5,IL6ST,TNFSF9,KLF4,ISG15,ANO6,NUMBL,TWF1,ABL1,ATP2B1,DUSP10,TBK1,MTPN,BCL10,SIX1,DDX3X,INAVA,GAB1,HIF1A,TRIB1,EDN1,KLF10,RIPK2,ITGB8,IL1R1,HDAC1,ITCH,ITGB1,CDON,KDM3A,…
GO:BP	cell cycle process	GO:0022402	2.08178e-06	5.68157	883	1256	114	17231	ADAMTS1,SLFN11,KIF2C,DAB2IP,RIPK1,FBXO7,PARP3,BACH1,CLTC,CDK17,SNX18,INHBA,MAPRE3,ZFP36L1,PML,E2F8,ATP2B4,SLC16A1,KLF4,FOXJ3,EPS8,DCUN1D3,KIF11,FOXJ2,DDX3X,CTC1,EDN1,KNL1,REC8,CRLF3,EIF2AK4,SPRY2,ITGB1,GEM,USP33,CENPE,TNKS,ING2,ROCK2,ATM,SVIL,KLHL21,KIF18A,PDS5A,MASTL,EREG,GJA1,TRIM36,TMOD3,ECT2,SBDS,PSME1,CEP55,HAUS6,ZFP36L2,NEK6,MYH10,ANXA1,ANLN,DLGAP5,KIF27,KMT2E,MITD1,EML4,NCAPH,NACC2,INO80,T…
GO:BP	antigen processing and presentation of peptide antigen	GO:0048002	2.09195e-06	5.67945	36	1256	16	17231	TAP1,CD74,BOLA-DRA,TAPBPL,ERAP2,LOC618733,LOC616942,ERAP1,BOLA-DMA,BOLA,TAPBP,LOC512672,CTSS,BOLA-NC1,JSP.1,IDE
GO:BP	developmental process	GO:0032502	2.19566e-06	5.65844	4445	1256	416	17231	IRF8,IRF1,ADAMTS1,STAT3,SBNO2,CSF1,TUBB3,FST,SOCS3,ITGA2,TEAD4,TRIM16,ADAR,STAT1,TLR4,CYP24A1,THBS1,BCL3,CD74,STARD13,FLNB,EIF2AK2,PDE3B,ATP8B1,ATF3,ARID5B,SAMHD1,MAFF,SMAD1,CGAS,TGM2,BOLA-DRA,MCL1,DAB2IP,CASP8,TNFRSF1A,CLDN1,NHS,B4GALT5,SLC34A2,ID1,SDC4,TNFSF13B,RIPK1,ADA,IL7,SOSTDC1,PSMB10,ZFP36,RHOBTB3,FBXO7,PARP3,ARID5A,RTKN2,PPARD,INHBA,PLEKHA4,HS6ST1,HGF,LRP8,PLEKHA1,NEDD9,PVR,ZFP36L1,TNS2,…
GO:BP	positive regulation of type I interferon production	GO:0032481	2.36504e-06	5.62616	46	1256	18	17231	IRF1,IRF7,STAT1,TLR4,IFIH1,CGAS,DDX58,OAS2,TBK1,DDX3X,DHX58,MAVS,CD14,POLR3A,IRF3,DHX9,PTPN11,RNF135
GO:BP	viral process	GO:0016032	2.51782e-06	5.59897	257	1256	48	17231	TRIM25,OAS1Y,GTF2B,TRIM21,MX1,ADAR,STAT1,ISG20,ZC3HAV1,CD74,IFIT5,EIF2AK2,LOC100139670,TRIM38,ZFP36,PVR,PML,RNASEL,TRIM14,OAS1X,TRIM34,N4BP1,ISG15,PARP10,TRIM5,USP6NL,DDX3X,NECTIN2,HSPA8,HDAC1,LOC785873,LOC616948,ROCK2,CHD1,YTHDC2,CCNT2,MAVS,ITGAV,PKN2,SRPK1,FMR1,BCL2L11,DHX9,SP1,CNOT7,LOC516599,STAU1,NEDD4
GO:BP	regulation of cell cycle	GO:0051726	2.61791e-06	5.58204	723	1256	98	17231	ADAMTS1,STAT3,TRIM21,SLFN11,DAB2IP,BIRC3,RIPK1,FBXO7,PARP3,CLTC,INHBA,MAPRE3,BIRC2,ZFP36L1,PML,E2F8,ATP2B4,MX2,KLF4,PPP1R13B,DCUN1D3,KIF11,ABL1,E2F2,XIAP,DDX3X,PUM1,CTC1,EDN1,NUP214,EIF2AK4,HSPA8,ITGB1,MCIDAS,CENPE,CDK12,TNKS,ROCK2,ATM,CYLD,SVIL,KLHL21,IQGAP1,MASTL,CCNL1,EREG,TRIM36,TMOD3,ECT2,PSME1,ZFP36L2,NEK6,ANXA1,DLGAP5,KMT2E,NACC2,INO80,TIMELESS,CCNT2,GPSM2,EGFR,RB1,CDK8,CLIC1,SPDYA,ATAD5,P…
GO:BP	regulation of phosphorylation	GO:0042325	2.76894e-06	5.55769	1013	1256	126	17231	NLRC5,STAT3,PARP14,CSF1,SOCS3,ADAR,TLR4,THBS1,CD74,ARHGEF5,EIF2AK2,DAB2IP,FAS,TNFRSF1A,RIPK1,IL7,FBXO7,PPP1R15B,DUSP16,INHBA,DAXX,HGF,LRP8,MAPRE3,NEDD9,MVP,EPHB2,SEMA7A,SPRED1,PML,PTPRJ,C3,SOCS1,ATP2B4,IL6ST,UBASH3B,NUP107,TIGAR,SDCBP,SLC4A4,RANBP2,RAP2A,TWF1,PTK2,ABL1,RICTOR,AIDA,ITGA6,DUSP10,LRRK1,BCL10,DDX3X,INAVA,HIF1A,TRIB1,EDN1,ADAM9,DUSP5,RIPK2,BCAR3,STK3,GNAQ,SPRY2,STRADB,MAP2K6,CENPE,CDO…
GO:BP	regulation of cellular response to stress	GO:0080135	2.91622e-06	5.53518	462	1256	71	17231	DTX3L,TLR4,CD74,EIF2AK2,CGAS,ARL6IP5,MCL1,DAB2IP,AIFM2,FAS,RIPK1,FBXO7,PARP3,PMAIP1,PPP1R15B,HGF,SPRED1,PML,LTBR,RELL1,KLF4,BFAR,TIGAR,RAP2A,ABL1,AIDA,DUSP10,SH3RF2,PPP4R2,INAVA,MAGI3,HIF1A,RIPK2,RSL1D1,PNPT1,STK3,ITCH,NCOA7,ING2,CYLD,PJA2,RTN4R,MET,NOD1,BCLAF1,LRRK2,NACC2,EGFR,SMG1,ATAD5,ARG2,RIF1,VPS13C,FMR1,USP25,PTPN2,ATR,FBH1,UFL1,ATF6,SLC38A2,FEM1B,KMT5A,SPRED3,MAP4K4,DHX9,BRCA1,FKTN,CHORDC…
GO:BP	cellular metabolic process	GO:0044237	3.13554e-06	5.50369	9278	1256	777	17231	IRF8,NLRC5,RNF19B,CIITA,IRF1,STAT3,SBNO2,PARP14,CSF1,ZNFX1,TRIM25,STAT2,IRF9,FST,IRF7,SOCS3,OAS1Y,DTX3L,RNF122,GTF2B,PARP9,TEAD4,TRIM21,TRIM16,ADAR,SLFN11,ITPKC,STAT1,TLR4,CYP24A1,PNKD,ISG20,GCLC,THBS1,UBA7,BCL3,PHLDA1,RNF125,ZC3HAV1,CD74,ARHGEF5,IFIH1,CMPK2,EIF2AK2,NT5DC3,DRAM1,ATP8B1,NMI,ATF3,ARID5B,LIPH,PDP1,PPA1,VCPIP1,SAMHD1,MAFF,SMAD1,ATAD1,CGAS,ARL6IP5,NAMPT,TGM2,MCL1,DAB2IP,CHSY1,PTPDC1,A…
GO:BP	cytokine-mediated signaling pathway	GO:0019221	3.39263e-06	5.46946	363	1256	60	17231	NLRC5,IRF1,STAT3,PARP14,CSF1,STAT2,IL15RA,IRF7,IFNAR2,PARP9,MX1,ADAR,STAT1,CD74,ZBP1,NMI,SAMHD1,TICAM2,FAS,TNFRSF1A,OSMR,TNFSF13B,RIPK1,IL7,OAS2,IL4R,OTUD4,SOCS1,IL6ST,IFNAR1,KRT8,JAK2,ISG15,RFFL,NUMBL,IL2RB,TBK1,UGCG,HIF1A,EDN1,RIPK2,KRT18,IL1R1,TRAF3IP2,IL10RB,CYLD,IL17RC,EREG,MAVS,TRIM44,IRAK4,YAP1,IL18RAP,PTPN2,IL13RA1,IRF3,CNOT7,MED1,RABGEF1,IKBKB
GO:BP	positive regulation of catalytic activity	GO:0043085	3.49466e-06	5.4566	943	1256	119	17231	STAT3,CSF1,DTX3L,TLR4,THBS1,CD74,ARHGEF5,STARD13,EIF2AK2,ARL6IP5,DAB2IP,CASP8,FAS,ITGA1,STARD8,RGS16,ARHGAP28,EGLN3,TNFSF10,RIPK1,PMAIP1,PPP1R15B,SNX18,DAXX,HGF,LRP8,MAPRE3,NEDD9,EPHB2,PML,SOCS1,ARAP2,GCLM,ATP2B4,NMUR2,KLF4,NUP107,TIGAR,RANBP2,PTK2,CFLAR,ABL1,RICTOR,ITGA6,DOCK8,BCL10,USP6NL,DDX3X,INAVA,EDN1,ARHGAP24,ADAM9,RIPK2,BCAR3,STK3,GNAQ,STRADB,ITGB1,MAP2K6,CENPE,SRGAP1,TNKS,SPAG9,SIPA1L3,R…
GO:BP	protein metabolic process	GO:0019538	4.293e-06	5.36724	4901	1256	450	17231	RNF19B,ADAMTS1,STAT3,PARP14,CSF1,TRIM25,SOCS3,DTX3L,RNF122,GTF2B,PARP9,LAP3,TRIM21,TRIM16,ADAR,TLR4,THBS1,UBA7,BCL3,PHLDA1,RNF125,CD74,ARHGEF5,IFIH1,EIF2AK2,NMI,APOL3,PDP1,VCPIP1,SMAD1,ARL6IP5,TGM2,DAB2IP,CHSY1,PTPDC1,CASP8,FAS,TNFRSF1A,ITGA1,BIRC3,LOC518495,EGLN3,B4GALT5,LOC515697,TNFSF10,USP18,RIPK1,TMEM106A,IL7,DYRK2,PSMB10,GOLPH3,ZFP36,FBXO7,PARP3,PMAIP1,PPP1R15B,LOC788334,ARID5A,DUSP16,CDK17…
GO:BP	cellular response to stimulus	GO:0051716	5.1516e-06	5.28806	6528	1256	574	17231	IRF8,NLRC5,LOC512486,IRF1,LOC511531,STAT3,SBNO2,PARP14,CSF1,TRIM25,FAM110C,STAT2,IL15RA,TUBB3,FST,IRF7,SOCS3,IFNAR2,ITGA2,DTX3L,LOC507055,ICOSLG,PARP9,PLCH1,TEAD4,TRIM21,TRIM16,MX1,ADAR,SLFN11,STAT1,TLR4,THBS1,UBA7,BCL3,RNF125,CDKN2AIP,CD74,ARHGEF5,IFIH1,STARD13,CMPK2,ZBP1,DOCK9,IFIT5,EIF2AK2,PDE3B,CISH,GBP4,NMI,ATF3,ARID5B,IFI16,CD47,VCPIP1,RRAS2,SAMHD1,SMAD1,CGAS,ARL6IP5,LOC101905041,NAMPT,TGM2…
GO:BP	primary metabolic process	GO:0044238	6.24749e-06	5.20429	9179	1256	768	17231	IRF8,NLRC5,RNF19B,CIITA,IRF1,ADAMTS1,STAT3,SBNO2,PARP14,CSF1,ZNFX1,TRIM25,STAT2,IRF9,FST,IRF7,SOCS3,OAS1Y,DTX3L,RNF122,GTF2B,PARP9,PLCH1,TEAD4,LAP3,TRIM21,TRIM16,ADAR,SLFN11,ITPKC,STAT1,TLR4,CYP24A1,PNKD,ISG20,GCLC,THBS1,UBA7,BCL3,PHLDA1,RNF125,ZC3HAV1,CD74,ARHGEF5,IFIH1,CMPK2,EIF2AK2,PDE3B,ATP8B1,NMI,APOL3,ATF3,ARID5B,LIPH,PDP1,VCPIP1,SAMHD1,MAFF,SMAD1,CGAS,ARL6IP5,NAMPT,TGM2,DAB2IP,CHSY1,PTPDC1…
GO:BP	regulation of protein modification by small protein conjugation or removal	GO:1903320	7.59171e-06	5.11966	184	1256	38	17231	DTX3L,TRIM21,NMI,BIRC3,DAXX,BIRC2,OTUD4,SENP2,N4BP1,ISG15,DCUN1D3,PARP10,ABL1,XIAP,BCL10,SH3RF2,DDX3X,INAVA,HIF1A,RIPK2,ITCH,SPRY2,PELI1,MASTL,PIAS1,LRRK2,OGT,TRIM44,HDAC4,NXN,UFL1,TNFAIP3,UBA2,BRCA1,AMER1,CDC20B,MYCBP2,NDFIP2
GO:BP	cellular macromolecule catabolic process	GO:0044265	7.6525e-06	5.1162	882	1256	112	17231	RNF19B,TRIM25,DTX3L,RNF122,ISG20,UBA7,RNF125,ZC3HAV1,DAB2IP,CASP8,CARHSP1,USP18,RIPK1,PSMB10,ZFP36,FBXO7,PMAIP1,PSMB9,ZFP36L1,PML,RNASEL,TBX21,DESI1,SMG6,FBXL14,PSMB8,N4BP1,RNF114,BFAR,ISG15,XRN2,RFFL,LDLR,KCTD6,RBCK1,CTSS,TRIB2,USP9X,UBR1,KCTD10,SH3RF2,PUM1,TRIB1,PNPT1,ITCH,TRAF3IP2,USP33,USP15,MOV10,PELI1,CYLD,USP42,USP34,VPS36,USP32,GSK3B,XRN1,PSME1,PIAS1,ZFP36L2,RC3H2,LRRK2,OGT,ANKIB1,STT3B,R…
GO:BP	nitrogen compound metabolic process	GO:0006807	7.78238e-06	5.10889	8701	1256	733	17231	IRF8,NLRC5,RNF19B,CIITA,IRF1,ADAMTS1,STAT3,SBNO2,PARP14,CSF1,ZNFX1,TRIM25,STAT2,IRF9,FST,IRF7,SOCS3,OAS1Y,DTX3L,RNF122,GTF2B,PARP9,TEAD4,LAP3,TRIM21,TRIM16,ADAR,SLFN11,STAT1,TLR4,PNKD,ISG20,GCLC,THBS1,UBA7,BCL3,PHLDA1,RNF125,ZC3HAV1,CD74,ARHGEF5,IFIH1,CMPK2,EIF2AK2,ATP8B1,NMI,APOL3,ATF3,ARID5B,PDP1,VCPIP1,SAMHD1,MAFF,SMAD1,CGAS,ARL6IP5,NAMPT,TGM2,DAB2IP,CHSY1,PTPDC1,CASP8,FAS,TNFRSF1A,ITGA1,PNP,B…
GO:BP	pattern recognition receptor signaling pathway	GO:0002221	8.58901e-06	5.06606	125	1256	30	17231	IRF1,IRF7,TLR4,RNF125,IFIH1,NMI,LOC101905041,DAB2IP,TIFA,OTUD4,GPR108,BCL10,DDX3X,INAVA,PUM1,RIPK2,USP15,PELI1,DHX58,PJA2,NOD1,IFI35,NLRX1,CD14,SEC14L1,ERBIN,IRF3,TNFAIP3,RNF135,UNC93B1
GO:BP	protein localization	GO:0008104	9.3236e-06	5.03042	1743	1256	190	17231	STAT3,TRIM25,DTX3L,TRIM21,TLR4,CD74,ARHGEF5,ATP8B1,RTP4,VCPIP1,ARL6IP5,TNFRSF1A,LOC100139670,RAB8B,GOLPH3,FBXO7,PARP3,CLTC,LOC112443175,SNX18,RAB20,VPS54,PLEKHA1,MAPRE3,PML,LOC781710,ARFRP1,TXNIP,NAPB,GBP5,TRIM34,DESI1,STX1A,ARL6IP1,MGAT3,SNX16,ATP2B4,STXBP3,SLC16A1,STX11,CMTM6,RAB33B,NUP107,TRAPPC8,IPO7,CD2AP,STEAP3,MORC3,RANBP2,RAP2A,TWF1,ZDHHC23,ABL1,STXBP1,HEATR5B,SAV1,SEC24B,TRIM5,TRAK2,FAM9…
GO:BP	regulation of protein kinase activity	GO:0045859	9.88193e-06	5.00516	552	1256	79	17231	CSF1,ADAR,TLR4,THBS1,ARHGEF5,EIF2AK2,DAB2IP,RIPK1,FBXO7,DUSP16,DAXX,HGF,LRP8,MAPRE3,NEDD9,MVP,EPHB2,SPRED1,PTPRJ,SOCS1,ATP2B4,UBASH3B,NUP107,PTK2,ABL1,RICTOR,AIDA,DUSP10,DDX3X,INAVA,TRIB1,EDN1,ADAM9,DUSP5,RIPK2,STK3,GNAQ,SPRY2,STRADB,MAP2K6,CENPE,CDK12,SPAG9,IQGAP1,NRG1,CCNL1,MAP4K5,EREG,ABI1,ECT2,LRRK2,GPRC5A,CCNT2,EGFR,RB1,RASIP1,SPDYA,CEMIP,CAB39,APC,SHB,PTPN2,SPRED3,MAP4K4,TNFAIP3,KAT2B,VEGFC…
GO:BP	negative regulation of viral process	GO:0048525	1.11878e-05	4.95126	67	1256	21	17231	TRIM25,OAS1Y,TRIM21,MX1,STAT1,ISG20,ZC3HAV1,IFIT5,EIF2AK2,LOC100139670,ZFP36,PML,RNASEL,TRIM14,OAS1X,N4BP1,ISG15,PARP10,LOC785873,MAVS,SRPK1
GO:BP	positive regulation of protein modification process	GO:0031401	1.18798e-05	4.92519	785	1256	102	17231	PARP14,CSF1,TLR4,THBS1,CD74,ARHGEF5,EIF2AK2,NMI,DAB2IP,FAS,TNFRSF1A,ITGA1,BIRC3,RIPK1,PPP1R15B,ARID5A,INHBA,DAXX,HGF,LRP8,MAPRE3,NEDD9,BIRC2,SEMA7A,C3,SOCS1,SENP2,ATP2B4,IL6ST,NUP107,SDCBP,DCUN1D3,RAP2A,PTK2,ABL1,RICTOR,XIAP,LRRK1,BCL10,DDX3X,INAVA,EDN1,ADAM9,RIPK2,BCAR3,STK3,SPRY2,STRADB,MAP2K6,CENPE,CDON,SPAG9,ING2,ROCK2,PELI1,IQGAP1,NRG1,MASTL,IL12A,MAP4K5,EREG,ABI1,ECT2,PIAS1,KMT2E,PRKAA2,LRR…
GO:BP	immune system development	GO:0002520	1.22004e-05	4.91363	724	1256	96	17231	IRF8,IRF1,STAT3,SBNO2,CSF1,FST,ADAR,STAT1,BCL3,CD74,EIF2AK2,SAMHD1,BOLA-DRA,CASP8,TNFSF13B,RIPK1,ADA,IL7,ZFP36,FBXO7,PARP3,RTKN2,INHBA,ZFP36L1,CEBPB,PML,TCAF2,SOCS1,TBX21,SP3,BATF2,EXO1,LTBR,TNFSF9,UBASH3B,KLF4,MYO1E,ETV6,JAK2,ISG15,ABL1,DUSP10,LRRK1,SIX1,HIF1A,TRIB1,CTC1,KLF10,RIPK2,ITGB8,ASXL1,STK3,ITCH,POLB,TRAF3IP2,SCIN,SIPA1L3,ATM,RUNX2,DCSTAMP,ABI1,TMOD3,SBDS,ZFP36L2,PRDM1,MR1,RC3H2,ANXA1,K…
GO:BP	regulation of cellular process	GO:0050794	1.25049e-05	4.90292	9952	1256	821	17231	IRF8,NLRC5,RNF19B,CIITA,IRF1,ADAMTS1,STAT3,SBNO2,PARP14,CSF1,ZNFX1,TRIM25,FAM110C,STAT2,IL15RA,TUBB3,IRF9,FST,IRF7,SOCS3,IFNAR2,ITGA2,OAS1Y,DTX3L,RNF122,ICOSLG,PARP9,PLCH1,TEAD4,TRIM21,TRIM16,MX1,ADAR,SLFN11,STAT1,TLR4,PNKD,GCLC,THBS1,BCL3,PHLDA1,RNF125,ZC3HAV1,CDKN2AIP,CD74,ARHGEF5,IFIH1,STARD13,ZBP1,DOCK9,IFIT5,EIF2AK2,PDE3B,CISH,DRAM1,ATP8B1,NMI,ATF3,ARID5B,LIMA1,CD47,VCPIP1,RRAS2,SAMHD1,MAFF,…
GO:BP	cellular component organization or biogenesis	GO:0071840	1.31461e-05	4.8812	5185	1256	469	17231	ADAMTS1,ZNFX1,FAM110C,TUBB3,DTX3L,GTF2B,TRIM16,ADAR,TLR4,THBS1,BCL3,CDKN2AIP,CD74,ARHGEF5,STARD13,CNN3,FLNB,EIF2AK2,ATP8B1,LIMA1,RTP4,VCPIP1,SAMHD1,SMAD1,ATAD1,KIF2C,BOLA-DRA,DAB2IP,PTPDC1,AIFM2,TNFRSF1A,ATP9A,STARD8,ARHGAP28,CLDN1,B4GALT5,TNFSF10,SDC4,TAPBPL,RIPK1,RAB8B,GOLPH3,RHOBTB3,TIFA,FBXO7,PARP3,PMAIP1,ARID5A,CLTC,PCGF5,SNX18,INHBA,RAB20,VPS54,DAXX,HGF,LRP8,PLEKHA1,MAPRE3,NEDD9,PVR,EPHB2,S…
GO:BP	regulation of transferase activity	GO:0051338	1.32491e-05	4.87781	715	1256	95	17231	NLRC5,CSF1,DTX3L,ADAR,TLR4,THBS1,CD74,ARHGEF5,EIF2AK2,DAB2IP,RIPK1,ZFP36,FBXO7,PARP3,DUSP16,DAXX,HGF,LRP8,MAPRE3,NEDD9,MVP,EPHB2,SPRED1,PTPRJ,SOCS1,ATP2B4,UBASH3B,KLF4,NUP107,TIGAR,RANBP2,PTK2,ABL1,RICTOR,AIDA,DUSP10,BCL10,DDX3X,INAVA,TRIB1,EDN1,ADAM9,DUSP5,RIPK2,STK3,GNAQ,SPRY2,STRADB,MAP2K6,CENPE,CDK12,TNKS,SPAG9,IQGAP1,NRG1,MASTL,CCNL1,MAP4K5,EREG,ABI1,ECT2,AKAP11,LRRK2,GPRC5A,CCNT2,EGFR,RB1,R…
GO:BP	cytoskeleton organization	GO:0007010	1.34043e-05	4.87276	1169	1256	138	17231	ARHGEF5,STARD13,CNN3,FLNB,LIMA1,KIF2C,STARD8,ARHGAP28,RHOBTB3,PARP3,CLTC,VPS54,MAPRE3,NEDD9,PVR,DIXDC1,CLIP1,SLC16A1,TRIP10,MYO1E,FHDC1,FITM2,EPS8,AMOTL1,CD2AP,MAST4,SDCBP,RASSF1,RND3,RAP2A,TWF1,KIF11,ABL1,RICTOR,MTPN,GAB1,ATXN7,EDN1,AIF1L,MAP2,NECTIN2,KRT18,LOC100141266,SPRY2,ITGB1,USP33,CENPE,TNKS,SCIN,TTBK2,SIPA1L3,ROCK2,C8H9ORF72,CYLD,SVIL,IQGAP1,KIF18A,GSK3B,MET,GJA1,TRIM36,CCDC120,ABI1,PRKC…
GO:BP	negative regulation of intracellular signal transduction	GO:1902532	1.4302e-05	4.8446	395	1256	62	17231	STAT1,TLR4,THBS1,RNF125,CD74,PDE3B,NMI,ATF3,MCL1,DAB2IP,CASP8,RIPK1,DYRK2,RTKN2,DUSP16,PLEKHA1,EPHB2,SPRED1,PTPRJ,ATP2B4,CD2AP,RFFL,ABL1,AIDA,DUSP10,UBR1,KCTD10,DDX3X,HIF1A,ARHGAP24,DUSP5,HDAC1,ITCH,SPRY2,ITGB1,ATM,CHP1,CYLD,DHX58,GSK3B,MET,IFI35,HOMER2,PRKAA2,NLRX1,LRRK2,RASIP1,ATAD5,RRM2B,FNIP1,PTPN2,SEC14L1,TNFAIP1,ERBIN,RASA1,SPRED3,TNFAIP3,FKTN,RABGEF1,RORA,PIK3IP1,TMBIM6
GO:BP	regulation of phosphorus metabolic process	GO:0051174	1.4949e-05	4.82539	1171	1256	138	17231	NLRC5,STAT3,PARP14,CSF1,SOCS3,ADAR,TLR4,THBS1,CD74,ARHGEF5,EIF2AK2,DAB2IP,FAS,TNFRSF1A,ITGA1,RIPK1,IL7,FBXO7,PPP1R15B,DUSP16,INHBA,DAXX,HGF,LRP8,MAPRE3,NEDD9,MVP,EPHB2,SEMA7A,SPRED1,PML,PTPRJ,C3,SOCS1,ATP2B4,IL6ST,UBASH3B,NUP107,TIGAR,SDCBP,SLC4A4,RANBP2,RAP2A,TWF1,CSRNP2,PTK2,LDLR,ABL1,RICTOR,AIDA,ITGA6,DUSP10,LRRK1,BCL10,SH3RF2,PPP4R2,DDX3X,INAVA,HIF1A,TRIB1,EDN1,ADAM9,DUSP5,RIPK2,BCAR3,KNL1,ST…
GO:BP	regulation of phosphate metabolic process	GO:0019220	1.4949e-05	4.82539	1171	1256	138	17231	NLRC5,STAT3,PARP14,CSF1,SOCS3,ADAR,TLR4,THBS1,CD74,ARHGEF5,EIF2AK2,DAB2IP,FAS,TNFRSF1A,ITGA1,RIPK1,IL7,FBXO7,PPP1R15B,DUSP16,INHBA,DAXX,HGF,LRP8,MAPRE3,NEDD9,MVP,EPHB2,SEMA7A,SPRED1,PML,PTPRJ,C3,SOCS1,ATP2B4,IL6ST,UBASH3B,NUP107,TIGAR,SDCBP,SLC4A4,RANBP2,RAP2A,TWF1,CSRNP2,PTK2,LDLR,ABL1,RICTOR,AIDA,ITGA6,DUSP10,LRRK1,BCL10,SH3RF2,PPP4R2,DDX3X,INAVA,HIF1A,TRIB1,EDN1,ADAM9,DUSP5,RIPK2,BCAR3,KNL1,ST…
GO:BP	positive regulation of immune system process	GO:0002684	1.5849e-05	4.8	607	1256	84	17231	NLRC5,CSF1,IRF7,ICOSLG,PARP9,TLR4,THBS1,CD74,ZBP1,NMI,IFI16,CD47,CGAS,BOLA-DRA,DDX58,CASP8,TNFSF13B,RIPK1,ADA,IL7,ARID5A,CD274,PLEKHA1,PVR,ZFP36L1,EPHB2,SEMA7A,LOC618733,PTPRJ,C3,SOCS1,TBX21,IL6ST,TNFSF9,ANO6,PTK2,ABL1,RBCK1,DUSP10,TBK1,DOCK8,BCL10,INAVA,C2,TRIB1,KLF10,RIPK2,NECTIN2,IL1R1,FYB1,ITCH,LOC107131209,PELI1,MASP1,DHX58,IL12A,EREG,DCSTAMP,NOD1,IFI35,MR1,RC3H2,ANXA1,SNX4,RB1,MAVS,C1S,LOC7…
GO:BP	regulation of kinase activity	GO:0043549	1.60223e-05	4.79528	637	1256	87	17231	NLRC5,CSF1,ADAR,TLR4,THBS1,CD74,ARHGEF5,EIF2AK2,DAB2IP,RIPK1,FBXO7,DUSP16,DAXX,HGF,LRP8,MAPRE3,NEDD9,MVP,EPHB2,SPRED1,PTPRJ,SOCS1,ATP2B4,UBASH3B,NUP107,TIGAR,RANBP2,PTK2,ABL1,RICTOR,AIDA,DUSP10,BCL10,DDX3X,INAVA,TRIB1,EDN1,ADAM9,DUSP5,RIPK2,STK3,GNAQ,SPRY2,STRADB,MAP2K6,CENPE,CDK12,SPAG9,IQGAP1,NRG1,CCNL1,MAP4K5,EREG,ABI1,ECT2,AKAP11,LRRK2,GPRC5A,CCNT2,EGFR,RB1,RASIP1,SPDYA,CEMIP,CAB39,APC,SHB,PT…
GO:BP	organonitrogen compound metabolic process	GO:1901564	1.75764e-05	4.75507	5664	1256	505	17231	RNF19B,ADAMTS1,STAT3,PARP14,CSF1,TRIM25,SOCS3,DTX3L,RNF122,GTF2B,PARP9,LAP3,TRIM21,TRIM16,ADAR,TLR4,PNKD,GCLC,THBS1,UBA7,BCL3,PHLDA1,RNF125,CD74,ARHGEF5,IFIH1,CMPK2,EIF2AK2,NMI,APOL3,PDP1,VCPIP1,SAMHD1,SMAD1,ARL6IP5,NAMPT,TGM2,DAB2IP,CHSY1,PTPDC1,CASP8,FAS,TNFRSF1A,ITGA1,PNP,BIRC3,LOC518495,EGLN3,B4GALT5,LOC515697,CDADC1,NT5E,TNFSF10,USP18,RIPK1,ADA,TMEM106A,UMPS,IL7,DYRK2,PSMB10,GOLPH3,ZFP36,FBX…
GO:BP	macromolecule catabolic process	GO:0009057	2.1801e-05	4.66152	1037	1256	125	17231	RNF19B,TRIM25,DTX3L,RNF122,ISG20,UBA7,RNF125,ZC3HAV1,DAB2IP,CASP8,CARHSP1,USP18,RIPK1,PSMB10,ZFP36,FBXO7,PMAIP1,PSMB9,ZFP36L1,PML,RNASEL,TBX21,DESI1,SMG6,FBXL14,PSMB8,AZIN1,N4BP1,RNF114,BFAR,ISG15,XRN2,RFFL,LDLR,KCTD6,RBCK1,CTSS,TRIB2,USP9X,UBR1,KCTD10,SH3RF2,PUM1,TRIB1,PNPT1,HSPA8,ITCH,TRAF3IP2,USP33,USP15,ATM,MOV10,PELI1,CYLD,USP42,USP34,VPS36,USP32,GSK3B,XRN1,PSME1,PIAS1,ZFP36L2,RC3H2,LRRK2,OG…
GO:BP	regulation of protein phosphorylation	GO:0001932	2.23898e-05	4.64995	899	1256	112	17231	PARP14,CSF1,SOCS3,ADAR,TLR4,THBS1,CD74,ARHGEF5,EIF2AK2,DAB2IP,FAS,TNFRSF1A,RIPK1,IL7,FBXO7,PPP1R15B,DUSP16,INHBA,DAXX,HGF,LRP8,MAPRE3,NEDD9,MVP,EPHB2,SEMA7A,SPRED1,PML,PTPRJ,C3,SOCS1,ATP2B4,IL6ST,UBASH3B,NUP107,SDCBP,RAP2A,TWF1,PTK2,ABL1,RICTOR,AIDA,DUSP10,LRRK1,DDX3X,INAVA,TRIB1,EDN1,ADAM9,DUSP5,RIPK2,BCAR3,STK3,GNAQ,SPRY2,STRADB,MAP2K6,CENPE,CDON,CDK12,SPAG9,ROCK2,C8H9ORF72,IQGAP1,NRG1,IL12A,CC…
GO:BP	mitotic cell cycle process	GO:1903047	2.29059e-05	4.64005	533	1256	76	17231	ADAMTS1,SLFN11,KIF2C,RIPK1,FBXO7,PARP3,BACH1,CLTC,CDK17,SNX18,INHBA,ZFP36L1,PML,KLF4,EPS8,DCUN1D3,KIF11,DDX3X,CTC1,EDN1,REC8,CRLF3,SPRY2,ITGB1,CENPE,TNKS,KIF18A,PDS5A,MASTL,EREG,GJA1,TRIM36,TMOD3,ECT2,SBDS,PSME1,CEP55,ZFP36L2,NEK6,MYH10,ANXA1,ANLN,DLGAP5,KIF27,KMT2E,MITD1,EML4,NCAPH,NACC2,INO80,GPSM2,EGFR,USP37,RB1,KIF23,SPDYA,ATAD5,DYNC1H1,CTDSP1,TICRR,APC,KIF2A,UBXN2B,MISP,TAF2,BRCA1,NSL1,CENPC…
GO:BP	response to interferon-gamma	GO:0034341	2.45143e-05	4.61058	109	1256	27	17231	IRF8,NLRC5,CIITA,LOC512486,IRF1,LOC511531,PARP14,LOC507055,PARP9,TRIM21,STAT1,TLR4,CD74,GBP4,NMI,RAB20,LOC781710,SOCS1,GBP5,STXBP3,STXBP1,CXCL16,LOC513659,CALCOCO2,PTPN2,ACTR3,MED1
GO:BP	negative regulation of nitrogen compound metabolic process	GO:0051172	2.54414e-05	4.59446	1858	1256	198	17231	IRF8,CIITA,IRF1,STAT3,SBNO2,PARP14,ZNFX1,FST,SOCS3,DTX3L,TRIM21,ADAR,GCLC,THBS1,BCL3,EIF2AK2,ATP8B1,ATF3,ARID5B,CGAS,DAB2IP,BIRC3,ID1,ZFP36,FBXO7,PARP3,BACH1,PPP1R15B,ARID5A,DUSP16,CLTC,PPARD,DAXX,HGF,BIRC2,MVP,ZFP36L1,EPHB2,SPRED1,LOC100298356,CEBPB,ZGPAT,PML,ZBTB38,PTPRJ,C3,TXNIP,SOCS1,TBX21,SP3,E2F8,ETS2,RFX5,SMG6,ARL6IP1,SENP2,DEPDC1,ATP2B4,AZIN1,N4BP1,UBASH3B,KLF4,LOC112441507,ETV6,RUNX1T1,B…
GO:BP	cellular response to type I interferon	GO:0071357	3.13481e-05	4.50379	42	1256	16	17231	NLRC5,STAT2,IRF7,IFNAR2,ADAR,STAT1,ZBP1,SAMHD1,LOC100139670,IFNAR1,ISG15,TBK1,MAVS,PTPN2,IRF3,CNOT7
GO:BP	hemopoiesis	GO:0030097	3.63337e-05	4.43969	638	1256	86	17231	IRF8,IRF1,STAT3,SBNO2,CSF1,FST,ADAR,STAT1,BCL3,CD74,EIF2AK2,BOLA-DRA,CASP8,TNFSF13B,RIPK1,ADA,IL7,ZFP36,FBXO7,RTKN2,INHBA,ZFP36L1,CEBPB,PML,TCAF2,SOCS1,TBX21,SP3,BATF2,LTBR,TNFSF9,UBASH3B,KLF4,MYO1E,ETV6,JAK2,ISG15,ABL1,DUSP10,LRRK1,HIF1A,TRIB1,CTC1,KLF10,RIPK2,ITGB8,ASXL1,STK3,TRAF3IP2,SCIN,SIPA1L3,ATM,RUNX2,DCSTAMP,ABI1,TMOD3,SBDS,ZFP36L2,PRDM1,MR1,RC3H2,ANXA1,KMT2E,CDH17,C5H12ORF29,RB1,SMAP1,P…
GO:BP	positive regulation of catabolic process	GO:0009896	4.23426e-05	4.37322	360	1256	57	17231	RNF19B,DTX3L,TRIM21,ZC3HAV1,DAB2IP,ZFP36,FBXO7,ZFP36L1,TRIM34,SLC4A4,LDLR,SPTLC2,TRIM5,TBK1,TRIB2,SH3RF2,PUM1,HIF1A,TRIB1,RIPK2,PNPT1,ITCH,IRS1,LOC616948,MOV10,C8H9ORF72,GSK3B,NOD1,PIAS1,PIK3C2A,ZFP36L2,RC3H2,PRKAA2,LRRK2,ANKIB1,FYCO1,CALCOCO2,TIPARP,NEDD4L,MSN,SH3GLB1,APC,UFL1,ATF6,BAG3,TNFAIP3,VPS13D,RNF217,AMER1,CDC20B,EGLN2,WAC,CNOT7,LOC516599,SMURF2,SMURF1,NEDD4
GO:BP	positive regulation of cellular catabolic process	GO:0031331	4.27786e-05	4.36877	306	1256	51	17231	RNF19B,DTX3L,TRIM21,ZC3HAV1,DAB2IP,ZFP36,FBXO7,ZFP36L1,TRIM34,SLC4A4,LDLR,SPTLC2,TRIM5,TBK1,TRIB2,SH3RF2,PUM1,HIF1A,TRIB1,RIPK2,PNPT1,ITCH,IRS1,LOC616948,MOV10,C8H9ORF72,GSK3B,NOD1,PIAS1,PIK3C2A,ZFP36L2,RC3H2,PRKAA2,LRRK2,ANKIB1,FYCO1,CALCOCO2,MSN,SH3GLB1,UFL1,ATF6,BAG3,TNFAIP3,VPS13D,RNF217,AMER1,CDC20B,WAC,CNOT7,LOC516599,SMURF1
GO:BP	apoptotic signaling pathway	GO:0097190	4.85094e-05	4.31417	436	1256	65	17231	THBS1,BCL3,CD74,ATF3,ARL6IP5,MCL1,DAB2IP,CASP8,FAS,TNFRSF1A,TNFSF10,RIPK1,IL7,DYRK2,PMAIP1,RTKN2,TNFRSF10D,PPARD,INHBA,HGF,CEBPB,PML,GCLM,LTBR,KRT8,PPP1R13B,RFFL,CFLAR,SHISA5,E2F2,ITGA6,RBCK1,BCL10,DDX3X,HIF1A,KRT18,STK3,HDAC1,STRADB,POLB,ING2,AEN,ATM,CYLD,SGK3,IL12A,GSK3B,BCLAF1,LRRK2,NACC2,ITGAV,ATAD5,YAP1,RRM2B,PTPN2,FBH1,BAG3,FEM1B,BCL2L11,TNFAIP3,BMPR1B,PHIP,BRCA1,TMBIM6,UACA
GO:BP	hematopoietic or lymphoid organ development	GO:0048534	5.43949e-05	4.26444	674	1256	89	17231	IRF8,IRF1,STAT3,SBNO2,CSF1,FST,ADAR,STAT1,BCL3,CD74,EIF2AK2,BOLA-DRA,CASP8,TNFSF13B,RIPK1,ADA,IL7,ZFP36,FBXO7,RTKN2,INHBA,ZFP36L1,CEBPB,PML,TCAF2,SOCS1,TBX21,SP3,BATF2,LTBR,TNFSF9,UBASH3B,KLF4,MYO1E,ETV6,JAK2,ISG15,ABL1,DUSP10,LRRK1,SIX1,HIF1A,TRIB1,CTC1,KLF10,RIPK2,ITGB8,ASXL1,STK3,POLB,TRAF3IP2,SCIN,SIPA1L3,ATM,RUNX2,DCSTAMP,ABI1,TMOD3,SBDS,ZFP36L2,PRDM1,MR1,RC3H2,ANXA1,KMT2E,CDH17,C5H12ORF29,R…
GO:BP	anatomical structure development	GO:0048856	6.15994e-05	4.21042	4113	1256	381	17231	IRF8,IRF1,ADAMTS1,STAT3,SBNO2,CSF1,TUBB3,FST,SOCS3,ITGA2,TEAD4,TRIM16,ADAR,STAT1,TLR4,THBS1,BCL3,CD74,STARD13,EIF2AK2,PDE3B,ATP8B1,ATF3,ARID5B,SAMHD1,MAFF,SMAD1,CGAS,TGM2,BOLA-DRA,MCL1,DAB2IP,CASP8,TNFRSF1A,CLDN1,NHS,B4GALT5,SLC34A2,SDC4,TNFSF13B,RIPK1,ADA,IL7,SOSTDC1,PSMB10,ZFP36,RHOBTB3,FBXO7,PARP3,ARID5A,RTKN2,PPARD,INHBA,PLEKHA4,HS6ST1,HGF,LRP8,PLEKHA1,NEDD9,PVR,ZFP36L1,TNS2,EPHB2,SEMA7A,SPRE…
GO:BP	viral life cycle	GO:0019058	6.19164e-05	4.20819	198	1256	38	17231	TRIM25,OAS1Y,TRIM21,MX1,ADAR,ISG20,ZC3HAV1,CD74,IFIT5,EIF2AK2,LOC100139670,TRIM38,PVR,PML,RNASEL,OAS1X,TRIM34,N4BP1,ISG15,PARP10,TRIM5,USP6NL,DDX3X,NECTIN2,HSPA8,LOC785873,LOC616948,ROCK2,YTHDC2,MAVS,ITGAV,PKN2,SRPK1,FMR1,CNOT7,LOC516599,STAU1,NEDD4
GO:BP	cellular protein catabolic process	GO:0044257	6.95352e-05	4.1578	647	1256	86	17231	RNF19B,TRIM25,DTX3L,RNF122,UBA7,RNF125,DAB2IP,CASP8,USP18,RIPK1,PSMB10,FBXO7,PMAIP1,PSMB9,PML,TBX21,DESI1,FBXL14,PSMB8,N4BP1,RNF114,BFAR,ISG15,RFFL,LDLR,KCTD6,RBCK1,CTSS,TRIB2,USP9X,UBR1,KCTD10,SH3RF2,TRIB1,ITCH,USP33,USP15,PELI1,CYLD,USP42,USP34,VPS36,USP32,GSK3B,PSME1,PIAS1,RC3H2,LRRK2,OGT,ANKIB1,STT3B,RYBP,PSME4,USP37,FBXO33,USP31,MAN1A1,NEDD4L,UGGT1,MSN,STYX,USP25,RNF150,UFL1,TMF1,FBXL18,HACE…
GO:BP	organic substance catabolic process	GO:1901575	7.18977e-05	4.14329	1583	1256	172	17231	RNF19B,STAT3,TRIM25,DTX3L,RNF122,PLCH1,CYP24A1,PNKD,ISG20,UBA7,RNF125,ZC3HAV1,PDE3B,LIPH,SAMHD1,DAB2IP,CASP8,CDADC1,NT5E,CARHSP1,USP18,RIPK1,ADA,PSMB10,ZFP36,FBXO7,PMAIP1,PPARD,PSMB9,SPP1,ZFP36L1,PML,RNASEL,SAT1,OAT,TBX21,DESI1,SMG6,FBXL14,PSMB8,ERAP1,ATP2B4,AZIN1,N4BP1,RNF114,FITM2,BFAR,ISG15,XRN2,TIGAR,RFFL,SLC4A4,LDLR,KCTD6,EHHADH,RBCK1,CTSS,TRIB2,USP9X,UBR1,KCTD10,SH3RF2,PUM1,SDS,HIF1A,TRIB1,…
GO:BP	negative regulation of protein modification process	GO:0031400	7.47569e-05	4.12635	403	1256	61	17231	PARP14,SOCS3,DTX3L,TRIM21,ADAR,DAB2IP,FBXO7,PPP1R15B,DUSP16,HGF,MVP,EPHB2,SPRED1,PTPRJ,SOCS1,SENP2,N4BP1,UBASH3B,BCOR,ISG15,DCUN1D3,PARP10,ABL1,AIDA,DUSP10,LRRK1,SH3RF2,TRIB1,DUSP5,CDYL,GNAQ,SPRY2,NCOA7,KDM3A,ROCK2,C8H9ORF72,MASTL,PRKAA2,LRRK2,OGT,RB1,TRIM44,RASIP1,NXN,SEMA4D,CTDSP1,APC,SHB,PTPN2,UFL1,SPRED3,TNFAIP3,KAT2B,BRCA1,PARVA,ERRFI1,PARD6A,RABGEF1,LMTK2,CHORDC1,IKBKB
GO:BP	cellular macromolecule localization	GO:0070727	8.04466e-05	4.09449	1303	1256	147	17231	STAT3,DTX3L,CD74,RTP4,VCPIP1,ARL6IP5,TNFRSF1A,RAB8B,GOLPH3,ZFP36,FBXO7,PARP3,CLTC,LOC112443175,RAB20,MAPRE3,ZFP36L1,PML,LOC781710,ARFRP1,TXNIP,NAPB,GBP5,DESI1,STX1A,ARL6IP1,SNX16,ATP2B4,STX11,RAB33B,NUP107,TRAPPC8,IPO7,CD2AP,MORC3,RANBP2,RAP2A,TWF1,ZDHHC23,STXBP1,SAV1,SEC24B,TRAK2,FAM91A1,SIX1,USP6NL,DDX3X,ATP1B1,NUP214,KRT18,KNL1,FYB1,HSPA8,SCFD2,STRADB,ITGB1,KLF5,RAB31,RIC1,TNKS,SCIN,GNPTAB,YWH…
GO:BP	regulation of viral genome replication	GO:0045069	8.95499e-05	4.04793	62	1256	19	17231	OAS1Y,MX1,ADAR,ISG20,ZC3HAV1,IFIT5,EIF2AK2,LOC100139670,RNASEL,OAS1X,N4BP1,ISG15,PARP10,DDX3X,MAVS,PKN2,SRPK1,CNOT7,STAU1
GO:BP	positive regulation of RNA metabolic process	GO:0051254	9.4001e-05	4.02687	1396	1256	155	17231	IRF8,NLRC5,CIITA,IRF1,STAT3,SBNO2,TRIM25,IRF7,DTX3L,TEAD4,TRIM21,TRIM16,STAT1,TLR4,BCL3,ZC3HAV1,CD74,ATF3,MAFF,SMAD1,NAMPT,DAB2IP,TNFRSF1A,RIPK1,KLF6,ZFP36,BACH1,ARID5A,PPARD,PCGF5,INHBA,DAXX,MAPRE3,SPP1,ZFP36L1,CEBPB,PML,RNASEL,TRIM14,IPPK,TBX21,SP3,E2F8,ETS2,RFX5,HNF4G,KLF4,FOXJ3,ETV6,PPRC1,GTF2H1,SALL1,CSRNP2,FOXJ2,E2F2,ITGA6,TBK1,BCL10,SIX1,NUFIP1,DDX3X,PUM1,MC1R,HIF1A,EDN1,KLF10,PNPT1,ASXL1,…
GO:BP	negative regulation of cellular metabolic process	GO:0031324	9.87826e-05	4.00532	2008	1256	208	17231	IRF8,CIITA,IRF1,STAT3,SBNO2,PARP14,ZNFX1,FST,SOCS3,DTX3L,TRIM21,ADAR,SLFN11,GCLC,THBS1,BCL3,EIF2AK2,ATP8B1,ATF3,ARID5B,CGAS,MCL1,DAB2IP,BIRC3,ID1,ZFP36,FBXO7,PARP3,BACH1,PPP1R15B,ARID5A,DUSP16,PPARD,DAXX,HGF,BIRC2,MVP,ZFP36L1,EPHB2,SPRED1,LOC100298356,CEBPB,ZGPAT,PML,ZBTB38,PTPRJ,C3,TXNIP,SOCS1,TBX21,SP3,E2F8,ETS2,RFX5,SMG6,ARL6IP1,SENP2,DEPDC1,ATP2B4,N4BP1,UBASH3B,KLF4,LOC112441507,ETV6,RUNX1T1,…
GO:BP	homeostasis of number of cells	GO:0048872	9.92006e-05	4.00349	218	1256	40	17231	STAT3,CSF1,ADAR,STAT1,CD74,ARHGEF5,FAS,TNFSF13B,ADA,IL7,ZFP36,INHBA,VPS54,ZFP36L1,SP3,JAK2,ISG15,ABL1,BCL10,HIF1A,ASXL1,POLB,TRAF3IP2,NAPEPLD,TMOD3,RC3H2,ANXA1,KMT2E,RB1,SMAP1,PTPN2,UFL1,PDE4B,BCL2L11,TNFAIP3,IREB2,PTPN11,PPP2R3C,FSTL1,MED1
GO:BP	regulation of cell differentiation	GO:0045595	0.000103487	3.98511	1076	1256	126	17231	IRF1,STAT3,CSF1,FST,SOCS3,TRIM16,STAT1,CD74,EIF2AK2,MAFF,SMAD1,TGM2,BOLA-DRA,DAB2IP,CASP8,TNFRSF1A,RIPK1,ADA,IL7,SOSTDC1,ZFP36,FBXO7,PPARD,INHBA,LRP8,NEDD9,ZFP36L1,EPHB2,SEMA7A,SPRED1,CEBPB,SDHAF2,SOCS1,TBX21,IL6ST,DIXDC1,TNFSF9,UBASH3B,KLF4,ISG15,NUMBL,PTK2,FOXJ2,LDLR,ABL1,SAV1,DUSP10,TRIB2,SIX1,HIF1A,TRIB1,EDN1,KLF10,PROM1,RIPK2,ASXL1,STK3,HDAC1,SPRY2,PLEKHB2,ITGB1,KLF5,CDON,CDK12,NAPEPLD,SPAG9…
GO:BP	negative regulation of protein metabolic process	GO:0051248	0.000117515	3.92991	810	1256	101	17231	STAT3,PARP14,SOCS3,DTX3L,TRIM21,ADAR,THBS1,EIF2AK2,DAB2IP,BIRC3,ZFP36,FBXO7,PPP1R15B,DUSP16,HGF,BIRC2,MVP,ZFP36L1,EPHB2,SPRED1,LOC100298356,PML,PTPRJ,C3,SOCS1,ARL6IP1,SENP2,AZIN1,N4BP1,UBASH3B,KLF4,LOC112441507,BCOR,ISG15,RFFL,DCUN1D3,LDLR,PARP10,ABL1,AIDA,DUSP10,XIAP,LRRK1,SH3RF2,DDX3X,PUM1,TRIB1,EDN1,DUSP5,PNPT1,CDYL,GNAQ,SPRY2,LOC107131209,NCOA7,KDM3A,ROCK2,MOV10,C8H9ORF72,MASTL,ZFP36L2,RC3H2,…
GO:BP	viral genome replication	GO:0019079	0.000125162	3.90253	89	1256	23	17231	OAS1Y,MX1,ADAR,ISG20,ZC3HAV1,IFIT5,EIF2AK2,LOC100139670,RNASEL,OAS1X,N4BP1,ISG15,PARP10,DDX3X,HSPA8,ROCK2,YTHDC2,MAVS,PKN2,SRPK1,FMR1,CNOT7,STAU1
GO:BP	response to type I interferon	GO:0034340	0.000141219	3.85011	46	1256	16	17231	NLRC5,STAT2,IRF7,IFNAR2,ADAR,STAT1,ZBP1,SAMHD1,LOC100139670,IFNAR1,ISG15,TBK1,MAVS,PTPN2,IRF3,CNOT7
GO:BP	type I interferon signaling pathway	GO:0060337	0.000166796	3.77781	41	1256	15	17231	NLRC5,STAT2,IRF7,IFNAR2,ADAR,STAT1,ZBP1,SAMHD1,IFNAR1,ISG15,TBK1,MAVS,PTPN2,IRF3,CNOT7
GO:BP	cellular protein localization	GO:0034613	0.000176935	3.75219	1297	1256	145	17231	STAT3,DTX3L,CD74,RTP4,VCPIP1,ARL6IP5,TNFRSF1A,RAB8B,GOLPH3,FBXO7,PARP3,CLTC,LOC112443175,RAB20,MAPRE3,PML,LOC781710,ARFRP1,TXNIP,NAPB,GBP5,DESI1,STX1A,ARL6IP1,SNX16,ATP2B4,STX11,RAB33B,NUP107,TRAPPC8,IPO7,CD2AP,MORC3,RANBP2,RAP2A,TWF1,ZDHHC23,STXBP1,SAV1,SEC24B,TRAK2,FAM91A1,SIX1,USP6NL,DDX3X,ATP1B1,NUP214,KRT18,KNL1,FYB1,HSPA8,SCFD2,STRADB,ITGB1,KLF5,RAB31,RIC1,TNKS,SCIN,GNPTAB,YWHAG,TTBK2,ROCK2…
GO:BP	multicellular organism development	GO:0007275	0.000196069	3.70759	3674	1256	343	17231	IRF8,IRF1,ADAMTS1,STAT3,SBNO2,CSF1,TUBB3,FST,SOCS3,ITGA2,TEAD4,TRIM16,ADAR,STAT1,TLR4,THBS1,BCL3,CD74,STARD13,EIF2AK2,PDE3B,ATP8B1,ATF3,ARID5B,SAMHD1,MAFF,SMAD1,CGAS,TGM2,BOLA-DRA,MCL1,DAB2IP,CASP8,TNFRSF1A,CLDN1,NHS,B4GALT5,SLC34A2,SDC4,TNFSF13B,RIPK1,ADA,IL7,SOSTDC1,ZFP36,FBXO7,PARP3,ARID5A,RTKN2,PPARD,INHBA,PLEKHA4,HS6ST1,HGF,LRP8,PLEKHA1,ZFP36L1,TNS2,EPHB2,SEMA7A,SPRED1,CASP7,CEBPB,DEGS1,PML,…
GO:BP	regulation of necroptotic process	GO:0060544	0.000208204	3.68151	18	1256	10	17231	ZBP1,CASP8,BIRC3,RIPK1,BIRC2,CFLAR,RBCK1,PELI1,CYLD,RNF31
GO:BP	system development	GO:0048731	0.000210394	3.67697	3364	1256	318	17231	IRF8,IRF1,ADAMTS1,STAT3,SBNO2,CSF1,TUBB3,FST,SOCS3,TEAD4,TRIM16,ADAR,STAT1,TLR4,THBS1,BCL3,CD74,STARD13,EIF2AK2,PDE3B,ATP8B1,ATF3,ARID5B,SAMHD1,MAFF,SMAD1,TGM2,BOLA-DRA,DAB2IP,CASP8,TNFRSF1A,CLDN1,NHS,B4GALT5,SDC4,TNFSF13B,RIPK1,ADA,IL7,SOSTDC1,ZFP36,FBXO7,PARP3,ARID5A,RTKN2,PPARD,INHBA,PLEKHA4,HS6ST1,HGF,LRP8,PLEKHA1,ZFP36L1,TNS2,EPHB2,SEMA7A,SPRED1,CASP7,CEBPB,DEGS1,PML,SDHAF2,SAT1,C3,TXNIP,TCA…
GO:BP	negative regulation of cellular protein metabolic process	GO:0032269	0.000212118	3.67342	767	1256	96	17231	STAT3,PARP14,SOCS3,DTX3L,TRIM21,ADAR,THBS1,EIF2AK2,DAB2IP,BIRC3,ZFP36,FBXO7,PPP1R15B,DUSP16,HGF,BIRC2,MVP,ZFP36L1,EPHB2,SPRED1,LOC100298356,PML,PTPRJ,C3,SOCS1,ARL6IP1,SENP2,N4BP1,UBASH3B,KLF4,LOC112441507,BCOR,ISG15,RFFL,DCUN1D3,PARP10,ABL1,AIDA,DUSP10,XIAP,LRRK1,SH3RF2,DDX3X,PUM1,TRIB1,EDN1,DUSP5,PNPT1,CDYL,GNAQ,SPRY2,LOC107131209,NCOA7,KDM3A,ROCK2,MOV10,C8H9ORF72,MASTL,ZFP36L2,RC3H2,PRKAA2,LRRK…
GO:BP	localization	GO:0051179	0.000220747	3.6561	5057	1256	451	17231	IRF8,TAP1,ADAMTS1,STAT3,CSF1,TRIM25,FAM110C,ITGA2,DTX3L,TRIM21,TLR4,PNKD,THBS1,CD74,ARHGEF5,STARD13,SLC22A5,GABRP,ATP8B1,APOL3,ARID5B,LIMA1,RTP4,CD47,VCPIP1,RRAS2,ATAD1,ARL6IP5,TGM2,KIF2C,DAB2IP,TICAM2,TNFRSF1A,ITGA1,ATP9A,LOC100139670,LOC518495,CLDN1,SLC6A9,LOC515697,SLC34A2,SDC4,RIPK1,RAB8B,ADA,GOLPH3,ZFP36,SYT7,RHOBTB3,FBXO7,PARP3,PMAIP1,LOC788334,ACSL5,CLTC,PPARD,LOC112443175,SNX18,INHBA,RAB2…
GO:BP	positive regulation of gene expression	GO:0010628	0.000223629	3.65047	810	1256	100	17231	IRF8,IRF1,STAT3,CSF1,IRF7,TRIM16,ADAR,STAT1,TLR4,THBS1,BCL3,CD74,IFIH1,EIF2AK2,ATF3,SMAD1,CGAS,TICAM2,DDX58,CASP8,RIPK1,TMEM106A,IL7,ZFP36,OAS2,ARID5A,PPARD,INHBA,HGF,EPHB2,SEMA7A,CEBPB,C3,TBX21,GBP5,LARP6,KLF4,ISG15,LDLR,ABL1,PRKAB1,TBK1,BCL10,DDX3X,INAVA,TNC,HIF1A,RIPK2,ITGB8,IL1R1,SERTAD1,HSPA8,SPRY2,TRAF3IP2,ROCK2,PELI1,IL17RC,RUNX2,DHX58,IL12A,PANX1,EREG,GJA1,NOD1,GSDMD,PRDM1,ANXA1,QKI,EGFR,…
GO:BP	negative regulation of multicellular organismal process	GO:0051241	0.000224906	3.648	664	1256	86	17231	IRF1,ADAMTS1,STAT1,TLR4,THBS1,BCL3,RNF125,CD74,STARD13,PDE3B,NMI,DAB2IP,CHSY1,TNFRSF1A,RIPK1,ADA,SOSTDC1,ZFP36,FBXO7,PARP3,INHBA,HGF,EPHB2,SEMA7A,SPRED1,PML,SDHAF2,SOCS1,TBX21,ATP2B4,PTGDR2,N4BP1,UBASH3B,KLF4,BCOR,CD2AP,FOXJ2,LDLR,ATP2B1,SAV1,E2F2,DUSP10,TRIB2,MC1R,HIF1A,TRIB1,STK3,ATP2A2,SPRY2,MAP2K6,ROCK2,FFAR4,DHX58,IL12A,RTN4R,GJA1,HOOK3,HOMER2,DOCK4,RC3H2,ANXA1,NLRX1,EGFR,RB1,TNFRSF11B,TNFRS…
GO:BP	protein catabolic process	GO:0030163	0.000225708	3.64645	768	1256	96	17231	RNF19B,TRIM25,DTX3L,RNF122,UBA7,RNF125,DAB2IP,CASP8,USP18,RIPK1,PSMB10,FBXO7,PMAIP1,PSMB9,PML,TBX21,DESI1,FBXL14,PSMB8,AZIN1,N4BP1,RNF114,BFAR,ISG15,RFFL,LDLR,KCTD6,RBCK1,CTSS,TRIB2,USP9X,UBR1,KCTD10,SH3RF2,TRIB1,HSPA8,ITCH,USP33,USP15,ATM,PELI1,CYLD,USP42,USP34,VPS36,USP32,GSK3B,PSME1,PIAS1,RC3H2,LRRK2,OGT,ANKIB1,STT3B,RYBP,PSME4,EGFR,USP37,FBXO33,USP31,MAN1A1,TIPARP,NEDD4L,UGGT1,MSN,TRIM24,STYX…
GO:BP	regulation of developmental process	GO:0050793	0.000229017	3.64013	1737	1256	183	17231	IRF1,ADAMTS1,STAT3,CSF1,FST,SOCS3,TEAD4,TRIM16,STAT1,THBS1,CD74,EIF2AK2,PDE3B,MAFF,SMAD1,CGAS,TGM2,BOLA-DRA,DAB2IP,CASP8,TNFRSF1A,B4GALT5,TNFSF13B,RIPK1,ADA,IL7,SOSTDC1,ZFP36,RHOBTB3,FBXO7,PARP3,PPARD,INHBA,PLEKHA4,HGF,LRP8,NEDD9,ZFP36L1,EPHB2,SEMA7A,SPRED1,CEBPB,PML,SDHAF2,C3,SOCS1,TBX21,ATP2B4,IL6ST,DIXDC1,TNFSF9,UBASH3B,KLF4,FITM2,BCOR,EPS8,ISG15,ANO6,NUMBL,RND3,RAP2A,PTK2,FOXJ2,LDLR,ABL1,ATP2…
GO:BP	cellular response to interferon-gamma	GO:0071346	0.000234204	3.63041	85	1256	22	17231	IRF8,NLRC5,LOC512486,IRF1,LOC511531,PARP14,LOC507055,PARP9,STAT1,TLR4,GBP4,NMI,RAB20,LOC781710,SOCS1,GBP5,STXBP3,STXBP1,LOC513659,PTPN2,ACTR3,MED1
GO:BP	positive regulation of macromolecule biosynthetic process	GO:0010557	0.000234309	3.63021	1450	1256	158	17231	IRF8,NLRC5,CIITA,IRF1,STAT3,SBNO2,TRIM25,IRF7,DTX3L,TEAD4,TRIM21,TRIM16,STAT1,TLR4,THBS1,BCL3,CD74,ATF3,MAFF,SMAD1,NAMPT,DAB2IP,TNFRSF1A,RIPK1,TMEM106A,KLF6,DYRK2,BACH1,ARID5A,PPARD,PCGF5,INHBA,DAXX,HGF,MAPRE3,SPP1,CEBPB,PML,RNASEL,TRIM14,IPPK,TBX21,SP3,E2F8,ETS2,RFX5,HNF4G,LARP6,KLF4,FOXJ3,ETV6,PPRC1,GTF2H1,SALL1,CSRNP2,FOXJ2,E2F2,ITGA6,TBK1,BCL10,SIX1,NUFIP1,DDX3X,MC1R,HIF1A,CTC1,EDN1,KLF10,ASX…
GO:BP	proteolysis involved in cellular protein catabolic process	GO:0051603	0.000243317	3.61383	614	1256	81	17231	RNF19B,TRIM25,DTX3L,RNF122,UBA7,RNF125,DAB2IP,CASP8,USP18,PSMB10,FBXO7,PMAIP1,PSMB9,PML,TBX21,DESI1,FBXL14,PSMB8,N4BP1,RNF114,BFAR,ISG15,RFFL,KCTD6,RBCK1,CTSS,TRIB2,USP9X,UBR1,KCTD10,SH3RF2,TRIB1,ITCH,USP33,USP15,PELI1,CYLD,USP42,USP34,VPS36,USP32,GSK3B,PSME1,PIAS1,RC3H2,LRRK2,OGT,ANKIB1,STT3B,RYBP,PSME4,USP37,FBXO33,USP31,MAN1A1,NEDD4L,UGGT1,STYX,USP25,RNF150,UFL1,TMF1,FBXL18,HACE1,UBA6,TNFAIP1,…
GO:BP	negative regulation of programmed cell death	GO:0043069	0.000253567	3.59591	635	1256	83	17231	SOCS3,ADAR,GCLC,THBS1,BCL3,CD74,EIF2AK2,MCL1,AIFM2,CASP8,FAS,BIRC3,RIPK1,ADA,IL7,GOLPH3,RTKN2,IFIT3,HGF,BIRC2,CEBPB,ARL6IP1,GCLM,KLF4,BFAR,TIGAR,RFFL,IL2RB,PTK2,CFLAR,ABL1,STXBP1,ITGA6,RBCK1,XIAP,DOCK8,BCL10,SIX1,SH3RF2,DDX3X,HIF1A,STK40,KRT18,HDAC1,ITCH,SPRY2,STRADB,ITGB1,ING2,PELI1,RNF31,SGK3,FFAR4,GSK3B,MET,PRKCI,MDM4,PDK4,PRKAA2,LRRK2,EGFR,SETX,ITGAV,PIK3CA,ATAD5,YAP1,BCL2A1,ARG2,RRM2B,HIPK3,…
GO:BP	organic substance transport	GO:0071702	0.000267616	3.57249	1706	1256	180	17231	TAP1,STAT3,TLR4,THBS1,CD74,ARHGEF5,ATP8B1,APOL3,LIMA1,RTP4,CD47,ARL6IP5,ATP9A,LOC100139670,LOC518495,SLC6A9,LOC515697,RIPK1,RAB8B,GOLPH3,ZFP36,FBXO7,LOC788334,ACSL5,CLTC,PPARD,SNX18,INHBA,RAB20,VPS54,SPP1,ZFP36L1,PML,RNASEL,LOC618733,ARFRP1,C3,TXNIP,NAPB,OSBPL3,SLC4A7,DESI1,STX1A,SLC38A1,ARL6IP1,LRP10,SNX16,ZC3H11A,AZIN1,STXBP3,NMUR2,SLC16A1,STX11,CMTM6,NUP107,IPO7,CD2AP,GRAMD1C,STEAP3,PLSCR2,SLC…
GO:BP	regulation of apoptotic signaling pathway	GO:2001233	0.000287016	3.54209	270	1256	45	17231	THBS1,CD74,ATF3,MCL1,DAB2IP,FAS,TNFSF10,RIPK1,IL7,PMAIP1,RTKN2,INHBA,HGF,PML,GCLM,LTBR,RFFL,CFLAR,ITGA6,RBCK1,BCL10,DDX3X,HIF1A,STK3,HDAC1,STRADB,ING2,CYLD,SGK3,GSK3B,BCLAF1,LRRK2,NACC2,ITGAV,ATAD5,YAP1,RRM2B,PTPN2,FBH1,FEM1B,TNFAIP3,BMPR1B,PHIP,BRCA1,TMBIM6
GO:BP	positive regulation of nucleobase-containing compound metabolic process	GO:0045935	0.000297535	3.52646	1524	1256	164	17231	IRF8,NLRC5,CIITA,IRF1,STAT3,SBNO2,TRIM25,IRF7,DTX3L,TEAD4,TRIM21,TRIM16,STAT1,TLR4,BCL3,ZC3HAV1,CD74,ATF3,MAFF,SMAD1,NAMPT,DAB2IP,TNFRSF1A,RIPK1,KLF6,ZFP36,PARP3,BACH1,ARID5A,PPARD,PCGF5,INHBA,DAXX,HGF,MAPRE3,SPP1,ZFP36L1,CEBPB,PML,RNASEL,TRIM14,OTUD4,IPPK,TBX21,SP3,E2F8,ETS2,RFX5,HNF4G,KLF4,FOXJ3,ETV6,PPRC1,GTF2H1,TIGAR,SALL1,SLC4A4,CSRNP2,FOXJ2,E2F2,ITGA6,TBK1,USP9X,BCL10,SIX1,NUFIP1,DDX3X,PUM1…
GO:BP	positive regulation of cellular biosynthetic process	GO:0031328	0.000303465	3.51789	1513	1256	163	17231	IRF8,NLRC5,CIITA,IRF1,STAT3,SBNO2,TRIM25,IRF7,DTX3L,TEAD4,TRIM21,TRIM16,STAT1,TLR4,THBS1,BCL3,CD74,ATF3,MAFF,SMAD1,NAMPT,DAB2IP,TNFRSF1A,RIPK1,KLF6,DYRK2,BACH1,ARID5A,PPARD,PCGF5,INHBA,DAXX,HGF,MAPRE3,SPP1,CEBPB,PML,RNASEL,TRIM14,IPPK,TBX21,SP3,E2F8,ETS2,RFX5,HNF4G,LARP6,KLF4,FOXJ3,ETV6,PPRC1,GTF2H1,SALL1,CSRNP2,FOXJ2,LDLR,E2F2,ITGA6,TBK1,BCL10,SIX1,NUFIP1,DDX3X,MC1R,HIF1A,CTC1,EDN1,KLF10,ASXL1,B…
GO:BP	regulation of localization	GO:0032879	0.00034032	3.46811	1946	1256	200	17231	ADAMTS1,STAT3,CSF1,TRIM25,FAM110C,DTX3L,TRIM21,TLR4,PNKD,THBS1,CD74,ARHGEF5,STARD13,ATP8B1,CD47,VCPIP1,RRAS2,ATAD1,ARL6IP5,TGM2,DAB2IP,TNFRSF1A,ATP9A,CLDN1,SDC4,RIPK1,RAB8B,ADA,GOLPH3,ZFP36,ACSL5,CLTC,PPARD,INHBA,HGF,NEDD9,SPP1,ZFP36L1,EPHB2,SEMA7A,SPRED1,CEBPB,PML,RNASEL,PTPRJ,C3,TRIM34,STX1A,ARL6IP1,MGAT3,ATP2B4,AZIN1,STXBP3,SCN9A,SLC16A1,MX2,UBASH3B,RAB33B,KLF4,FITM2,AMOTL1,CD2AP,ANO6,IL2RB,RA…
GO:BP	anatomical structure morphogenesis	GO:0009653	0.000380469	3.41968	2008	1256	205	17231	ADAMTS1,STAT3,SBNO2,CSF1,TUBB3,FST,SOCS3,ITGA2,TEAD4,STAT1,THBS1,BCL3,STARD13,PDE3B,ATP8B1,ARID5B,SMAD1,TGM2,DAB2IP,TNFRSF1A,B4GALT5,SDC4,TNFSF13B,ADA,SOSTDC1,PSMB10,RHOBTB3,INHBA,PLEKHA4,HS6ST1,HGF,LRP8,PLEKHA1,NEDD9,PVR,ZFP36L1,EPHB2,SEMA7A,SPRED1,CEBPB,PML,SAT1,ARFRP1,C3,TBX21,SP3,E2F8,LGALS8,FJX1,ATP2B4,SOBP,DCDC2,RAB33B,KLF4,MYO1E,FITM2,PTGFRN,BCOR,EPS8,AMOTL1,LUZP1,SALL1,NUMBL,RND3,RAP2A,PT…
GO:BP	positive regulation of biosynthetic process	GO:0009891	0.000401157	3.39669	1531	1256	164	17231	IRF8,NLRC5,CIITA,IRF1,STAT3,SBNO2,TRIM25,IRF7,DTX3L,TEAD4,TRIM21,TRIM16,STAT1,TLR4,THBS1,BCL3,CD74,ATF3,MAFF,SMAD1,NAMPT,DAB2IP,TNFRSF1A,RIPK1,TMEM106A,KLF6,DYRK2,BACH1,ARID5A,PPARD,PCGF5,INHBA,DAXX,HGF,MAPRE3,SPP1,CEBPB,PML,RNASEL,TRIM14,IPPK,TBX21,SP3,E2F8,ETS2,RFX5,HNF4G,LARP6,KLF4,FOXJ3,ETV6,PPRC1,GTF2H1,SALL1,CSRNP2,FOXJ2,LDLR,E2F2,ITGA6,TBK1,BCL10,SIX1,NUFIP1,DDX3X,MC1R,HIF1A,CTC1,EDN1,KLF1…
GO:BP	regulation of interferon-alpha production	GO:0032647	0.000410759	3.38641	19	1256	10	17231	IRF7,STAT1,TLR4,IFIH1,NMI,TBK1,DDX3X,MAVS,IRF3,DHX9
GO:BP	interferon-alpha production	GO:0032607	0.000410759	3.38641	19	1256	10	17231	IRF7,STAT1,TLR4,IFIH1,NMI,TBK1,DDX3X,MAVS,IRF3,DHX9
GO:BP	regulation of nucleobase-containing compound metabolic process	GO:0019219	0.000432093	3.36442	3214	1256	304	17231	IRF8,NLRC5,CIITA,IRF1,STAT3,SBNO2,PARP14,ZNFX1,TRIM25,STAT2,IRF9,FST,IRF7,OAS1Y,DTX3L,TEAD4,TRIM21,TRIM16,STAT1,TLR4,GCLC,BCL3,ZC3HAV1,CD74,ARHGEF5,EIF2AK2,ATP8B1,ATF3,ARID5B,MAFF,SMAD1,CGAS,NAMPT,DAB2IP,TNFRSF1A,SP110,ID1,CARHSP1,RIPK1,KLF6,TRIM38,ZFP36,PARP3,BACH1,ARID5A,RTKN2,CDK17,PPARD,PCGF5,INHBA,DAXX,HGF,LRP8,MAPRE3,SPP1,ZFP36L1,CEBPB,ZGPAT,PML,RNASEL,ZBTB38,TRIM14,OAS1X,TXNIP,OTUD4,IPPK,T…
GO:BP	regulation of extrinsic apoptotic signaling pathway via death domain receptors	GO:1902041	0.000444971	3.35167	33	1256	13	17231	THBS1,ATF3,PMAIP1,HGF,RFFL,CFLAR,DDX3X,STK3,GSK3B,FEM1B,TNFAIP3,BMPR1B,BRCA1
GO:BP	negative regulation of defense response	GO:0031348	0.000487854	3.31171	140	1256	29	17231	NLRC5,PARP14,SOCS3,TRIM21,ADAR,RNF125,NMI,SAMHD1,TNFRSF1A,NT5E,ADA,ZFP36,PPARD,HGF,ISG15,LDLR,DUSP10,ITCH,FFAR4,DHX58,NLRX1,RB1,ARG2,PTPN2,SEC14L1,TNFAIP3,CNOT7,RABGEF1,RORA
GO:BP	cellular response to DNA damage stimulus	GO:0006974	0.000516763	3.28671	625	1256	81	17231	DTX3L,SLFN11,UBA7,BCL3,CDKN2AIP,CD74,VCPIP1,SAMHD1,CGAS,MCL1,TNFRSF1A,DYRK2,PARP3,BACH1,PMAIP1,SPRED1,PML,ZBTB38,EXO1,GTF2H1,TIGAR,PARP10,ABL1,SHISA5,XIAP,KDM2A,PPP4R2,MC1R,CTC1,POLI,REC8,EIF2AK4,POLB,GINS2,AEN,ATM,PDS5A,MCM10,BCLAF1,POLH,SUSD6,PSME4,NACC2,TOPBP1,INO80,TIMELESS,EGFR,SETX,SMG1,SPDYA,ATAD5,YAP1,RRM2B,RIF1,TICRR,APC,FMR1,WDHD1,ATR,FBH1,UFL1,FEM1B,BCL2L11,KMT5A,RPAIN,SPRED3,DHX9,BRCA…
GO:BP	response to peptide	GO:1901652	0.000531214	3.27473	249	1256	42	17231	STAT3,STAT2,SOCS3,TRIM16,STAT1,TLR4,RAB8B,ZFP36L1,TNS2,SOCS1,STXBP3,PTK2,ATP2B1,INAVA,IGFBP3,RIPK2,BCAR3,IRS1,RAB31,CACNA2D1,DENND4C,GSK3B,NOD1,PRKCI,PDK4,ANXA1,LPIN2,OGT,ZNF106,APC,VPS13C,PTPN2,ERBIN,TNFAIP3,KAT2B,PHIP,PTPN11,AHCYL1,C2CD5,SOCS2,LGMN,OSBPL8
GO:BP	positive regulation of transcription by RNA polymerase II	GO:0045944	0.000541184	3.26666	1009	1256	117	17231	IRF8,NLRC5,CIITA,IRF1,STAT3,SBNO2,IRF7,TEAD4,STAT1,TLR4,BCL3,ATF3,MAFF,SMAD1,NAMPT,DAB2IP,TNFRSF1A,RIPK1,KLF6,BACH1,ARID5A,PPARD,PCGF5,INHBA,CEBPB,RNASEL,SP3,E2F8,RFX5,HNF4G,KLF4,FOXJ3,ETV6,PPRC1,SALL1,CSRNP2,FOXJ2,E2F2,ITGA6,TBK1,SIX1,NUFIP1,DDX3X,MC1R,HIF1A,EDN1,KLF10,ASXL1,SERTAD1,CRLF3,HDAC1,ELK3,KLF5,CDON,LOC100299712,CDK12,TNKS,NCOA7,KDM3A,ATM,ASXL2,RUNX2,POU2F1,NRIP1,MET,DR1,MDM4,HLTF,BCLA…
GO:BP	tube development	GO:0035295	0.00056032	3.25156	783	1256	96	17231	ADAMTS1,STAT3,CSF1,STAT1,THBS1,STARD13,PDE3B,SMAD1,TGM2,DAB2IP,SDC4,ADA,SOSTDC1,HS6ST1,ZFP36L1,EPHB2,SPRED1,PML,SAT1,C3,TBX21,SP3,E2F8,ATP2B4,IL6ST,KLF4,MYO1E,AMOTL1,TIGAR,LUZP1,SALL1,PTK2,FOXJ2,LDLR,ABL1,SAV1,E2F2,SEC24B,SEMA3C,NRP2,BCL10,SIX1,GAB1,HIF1A,EDN1,STK40,PROM1,ITGB8,ASXL1,REC8,STK3,SPRY2,ELK3,ITGB1,KLF5,ING2,ESM1,ROCK2,CLIC4,KIF18A,IL12A,MET,PIK3C2A,PRDM1,RC3H2,TULP3,ANXA1,HK2,ADAMTS1…
GO:BP	regulation of cellular component organization	GO:0051128	0.000573477	3.24148	1725	1256	180	17231	FAM110C,TLR4,CDKN2AIP,ARHGEF5,EIF2AK2,ATP8B1,LIMA1,ATAD1,DAB2IP,TNFRSF1A,ARHGAP28,TNFSF10,SDC4,GOLPH3,RHOBTB3,FBXO7,PARP3,PMAIP1,ARID5A,CLTC,INHBA,HGF,LRP8,MAPRE3,EPHB2,SEMA7A,PML,PTPRJ,C3,NAPB,GBP5,STX1A,SMG6,ARL6IP1,DIXDC1,CLIP1,DCDC2,RAB33B,KLF4,BCOR,EPS8,CD2AP,TIGAR,MIER1,RASSF1,DCUN1D3,RND3,RAP2A,TWF1,PTK2,LDLR,PARP10,ABL1,RICTOR,ANKFY1,AIDA,SDC1,MTPN,CDC42EP1,NRP2,SIX1,USP6NL,DDX3X,ATXN7,HI…
GO:BP	vasculature development	GO:0001944	0.000574718	3.24054	525	1256	71	17231	ADAMTS1,STAT3,SOCS3,STAT1,THBS1,STARD13,PDE3B,SMAD1,DAB2IP,HS6ST1,ZFP36L1,EPHB2,SPRED1,PML,SAT1,C3,E2F8,LGALS8,ATP2B4,KLF4,MYO1E,AMOTL1,LUZP1,PTK2,FOXJ2,LDLR,ABL1,E2F2,SEC24B,SEMA3C,NRP2,SIX1,GAB1,HIF1A,EDN1,ITGB8,ZFAND5,SPRY2,ELK3,ITGB1,KLF5,ESM1,ROCK2,CLIC4,IL12A,PIK3C2A,PRDM1,ANXA1,HK2,QKI,ITGAV,RASIP1,FOXS1,HECTD1,TIPARP,BMPR2,YAP1,SHB,RASA1,VEGFC,BRCA1,PARVA,SP1,ERRFI1,MIB1,MED1,RORA,CPLANE1…
GO:BP	cytoplasmic pattern recognition receptor signaling pathway	GO:0002753	0.000593909	3.22628	39	1256	14	17231	TLR4,RNF125,IFIH1,TIFA,INAVA,PUM1,RIPK2,USP15,DHX58,NLRX1,SEC14L1,ERBIN,TNFAIP3,RNF135
GO:BP	positive regulation of transcription, DNA-templated	GO:0045893	0.000605782	3.21768	1301	1256	143	17231	IRF8,NLRC5,CIITA,IRF1,STAT3,SBNO2,TRIM25,IRF7,DTX3L,TEAD4,TRIM21,TRIM16,STAT1,TLR4,BCL3,CD74,ATF3,MAFF,SMAD1,NAMPT,DAB2IP,TNFRSF1A,RIPK1,KLF6,BACH1,ARID5A,PPARD,PCGF5,INHBA,DAXX,MAPRE3,SPP1,CEBPB,PML,RNASEL,TRIM14,IPPK,TBX21,SP3,E2F8,ETS2,RFX5,HNF4G,KLF4,FOXJ3,ETV6,PPRC1,GTF2H1,SALL1,CSRNP2,FOXJ2,E2F2,ITGA6,TBK1,BCL10,SIX1,NUFIP1,DDX3X,MC1R,HIF1A,EDN1,KLF10,ASXL1,SERTAD1,CRLF3,HDAC1,ELK3,KLF5,CDO…
GO:BP	positive regulation of nucleic acid-templated transcription	GO:1903508	0.000605782	3.21768	1301	1256	143	17231	IRF8,NLRC5,CIITA,IRF1,STAT3,SBNO2,TRIM25,IRF7,DTX3L,TEAD4,TRIM21,TRIM16,STAT1,TLR4,BCL3,CD74,ATF3,MAFF,SMAD1,NAMPT,DAB2IP,TNFRSF1A,RIPK1,KLF6,BACH1,ARID5A,PPARD,PCGF5,INHBA,DAXX,MAPRE3,SPP1,CEBPB,PML,RNASEL,TRIM14,IPPK,TBX21,SP3,E2F8,ETS2,RFX5,HNF4G,KLF4,FOXJ3,ETV6,PPRC1,GTF2H1,SALL1,CSRNP2,FOXJ2,E2F2,ITGA6,TBK1,BCL10,SIX1,NUFIP1,DDX3X,MC1R,HIF1A,EDN1,KLF10,ASXL1,SERTAD1,CRLF3,HDAC1,ELK3,KLF5,CDO…
GO:BP	positive regulation of RNA biosynthetic process	GO:1902680	0.000633827	3.19803	1302	1256	143	17231	IRF8,NLRC5,CIITA,IRF1,STAT3,SBNO2,TRIM25,IRF7,DTX3L,TEAD4,TRIM21,TRIM16,STAT1,TLR4,BCL3,CD74,ATF3,MAFF,SMAD1,NAMPT,DAB2IP,TNFRSF1A,RIPK1,KLF6,BACH1,ARID5A,PPARD,PCGF5,INHBA,DAXX,MAPRE3,SPP1,CEBPB,PML,RNASEL,TRIM14,IPPK,TBX21,SP3,E2F8,ETS2,RFX5,HNF4G,KLF4,FOXJ3,ETV6,PPRC1,GTF2H1,SALL1,CSRNP2,FOXJ2,E2F2,ITGA6,TBK1,BCL10,SIX1,NUFIP1,DDX3X,MC1R,HIF1A,EDN1,KLF10,ASXL1,SERTAD1,CRLF3,HDAC1,ELK3,KLF5,CDO…
GO:BP	nucleic acid metabolic process	GO:0090304	0.000643407	3.19151	4236	1256	384	17231	IRF8,NLRC5,CIITA,IRF1,STAT3,SBNO2,PARP14,ZNFX1,TRIM25,STAT2,IRF9,FST,IRF7,OAS1Y,DTX3L,GTF2B,TEAD4,TRIM21,TRIM16,ADAR,SLFN11,STAT1,TLR4,ISG20,GCLC,BCL3,ZC3HAV1,CD74,ARHGEF5,EIF2AK2,ATP8B1,NMI,ATF3,ARID5B,VCPIP1,SAMHD1,MAFF,SMAD1,CGAS,NAMPT,DAB2IP,TNFRSF1A,CDADC1,SP110,ID1,CARHSP1,RIPK1,KLF6,TRIM38,ZFP36,PARP3,BACH1,ARID5A,RTKN2,TXNL4B,CDK17,CMTR2,PPARD,PRORSD1,PCGF5,INHBA,DAXX,HGF,LRP8,MAPRE3,SPP1…
GO:BP	regulation of biosynthetic process	GO:0009889	0.000670514	3.17359	3316	1256	311	17231	IRF8,NLRC5,CIITA,IRF1,STAT3,SBNO2,PARP14,ZNFX1,TRIM25,STAT2,IRF9,FST,IRF7,DTX3L,TEAD4,TRIM21,TRIM16,SLFN11,STAT1,TLR4,GCLC,THBS1,BCL3,CD74,ARHGEF5,EIF2AK2,ATP8B1,ATF3,ARID5B,MAFF,SMAD1,NAMPT,DAB2IP,TNFRSF1A,SP110,ID1,RIPK1,TMEM106A,KLF6,DYRK2,TRIM38,ZFP36,PARP3,BACH1,PPP1R15B,ARID5A,RTKN2,CLTC,CDK17,PPARD,PCGF5,INHBA,DAXX,HGF,LRP8,MAPRE3,SPP1,ZFP36L1,CEBPB,ZGPAT,PML,RNASEL,ZBTB38,TRIM14,C3,TXNIP,…
GO:BP	negative regulation of molecular function	GO:0044092	0.000692393	3.15965	840	1256	101	17231	NLRC5,DTX3L,TRIM21,ADAR,THBS1,DAB2IP,IFIT2,LOC100139670,BIRC3,ARHGAP28,ID1,IL7,ZFP36,FBXO7,PARP3,DUSP16,HGF,BIRC2,MVP,EPHB2,SPRED1,LOC100298356,PTPRJ,C3,TXNIP,SOCS1,ARL6IP1,ATP2B4,UBASH3B,KLF4,LOC112441507,RFFL,CSRNP2,PARP10,ABL1,AIDA,RBCK1,DUSP10,XIAP,SH3RF2,DDX3X,TRIB1,DUSP5,KNL1,ATP2A2,ITCH,GNAQ,SPRY2,GEM,LOC107131209,USP33,LRCH1,TNKS,TTBK2,ABCE1,ROCK2,PELI1,C8H9ORF72,CHP1,CYLD,MASTL,GSK3B,MET…
GO:BP	regulation of programmed necrotic cell death	GO:0062098	0.000767754	3.11478	20	1256	10	17231	ZBP1,CASP8,BIRC3,RIPK1,BIRC2,CFLAR,RBCK1,PELI1,CYLD,RNF31
GO:BP	blood vessel development	GO:0001568	0.000773004	3.11182	499	1256	68	17231	ADAMTS1,STAT3,SOCS3,STAT1,THBS1,STARD13,PDE3B,SMAD1,DAB2IP,HS6ST1,ZFP36L1,EPHB2,SPRED1,PML,SAT1,C3,E2F8,ATP2B4,KLF4,MYO1E,AMOTL1,LUZP1,PTK2,FOXJ2,LDLR,ABL1,E2F2,SEC24B,SEMA3C,NRP2,SIX1,GAB1,HIF1A,EDN1,ITGB8,SPRY2,ELK3,ITGB1,KLF5,ESM1,ROCK2,CLIC4,IL12A,PIK3C2A,PRDM1,ANXA1,HK2,QKI,ITGAV,RASIP1,FOXS1,HECTD1,TIPARP,BMPR2,YAP1,SHB,RASA1,VEGFC,BRCA1,PARVA,SP1,MIB1,MED1,RORA,CPLANE1,VEZF1,CHI3L1,LAMA4
GO:BP	protein polyubiquitination	GO:0000209	0.000790476	3.10211	192	1256	35	17231	RNF19B,DTX3L,TRIM21,RNF125,NMI,TRIM34,RNF114,BFAR,RFFL,PARP10,TRIM5,RBCK1,XIAP,DDX3X,ITCH,TRAF3IP2,TNKS,LOC616948,PELI1,JADE2,RC3H2,ANKIB1,TRIM44,TNKS2,HECTD1,NEDD4L,HACE1,TNFAIP3,RNF217,BRCA1,RNF135,LOC516599,SMURF2,SMURF1,NEDD4
GO:BP	interferon-gamma-mediated signaling pathway	GO:0060333	0.000808279	3.09244	16	1256	9	17231	NLRC5,IRF1,PARP14,PARP9,STAT1,NMI,SOCS1,PTPN2,MED1
GO:BP	cellular response to leukemia inhibitory factor	GO:1990830	0.000821142	3.08558	77	1256	20	17231	SBNO2,TRIM25,SOCS3,RNF125,ARID5B,PML,GCLM,KLF4,EPS8,NRP2,ABCD4,SPRY2,KLF5,KDM3A,HK2,B3GNT2,RIF1,SNX10,VEGFC,SMARCA5
GO:BP	negative regulation of viral genome replication	GO:0045071	0.000852653	3.06923	40	1256	14	17231	OAS1Y,MX1,ISG20,ZC3HAV1,IFIT5,EIF2AK2,LOC100139670,RNASEL,OAS1X,N4BP1,ISG15,PARP10,MAVS,SRPK1
GO:BP	negative regulation of response to biotic stimulus	GO:0002832	0.000855601	3.06773	64	1256	18	17231	NLRC5,PARP14,TRIM21,ADAR,RNF125,NMI,SAMHD1,ISG15,DUSP10,TRIB1,ITCH,DHX58,NLRX1,ARG2,PTPN2,SEC14L1,TNFAIP3,CNOT7
GO:BP	regulation of RNA metabolic process	GO:0051252	0.00087715	3.05693	3027	1256	287	17231	IRF8,NLRC5,CIITA,IRF1,STAT3,SBNO2,PARP14,ZNFX1,TRIM25,STAT2,IRF9,FST,IRF7,OAS1Y,DTX3L,TEAD4,TRIM21,TRIM16,STAT1,TLR4,GCLC,BCL3,ZC3HAV1,CD74,ARHGEF5,EIF2AK2,ATP8B1,ATF3,ARID5B,MAFF,SMAD1,NAMPT,DAB2IP,TNFRSF1A,SP110,ID1,CARHSP1,RIPK1,KLF6,TRIM38,ZFP36,BACH1,ARID5A,RTKN2,CDK17,PPARD,PCGF5,INHBA,DAXX,LRP8,MAPRE3,SPP1,ZFP36L1,CEBPB,ZGPAT,PML,RNASEL,ZBTB38,TRIM14,OAS1X,TXNIP,IPPK,TBX21,SP3,E2F8,BATF2,T…
GO:BP	response to oxygen-containing compound	GO:1901700	0.000891188	3.05003	942	1256	110	17231	IRF8,STAT3,SBNO2,STAT2,SOCS3,TRIM16,STAT1,TLR4,CYP24A1,THBS1,CMPK2,TGM2,DAB2IP,RIPK1,RAB8B,GOLPH3,ZFP36,SOD2,PPP1R15B,ARID5A,CD274,HGF,PLEKHA1,SPP1,ZFP36L1,TNS2,CEBPB,SOCS1,ATP2B4,STXBP3,KLF4,EPS8,GRAMD1C,PTK2,LDLR,ABL1,ATP2B1,DUSP10,UBR1,BCL10,INAVA,HIF1A,TRIB1,IGFBP3,ADAM9,RIPK2,ASXL1,BCAR3,GNAQ,IRS1,RAB31,CACNA2D1,ROCK2,ATM,PELI1,DENND4C,IL12A,RDH11,GSK3B,NRIP1,MET,NOD1,PRKCI,ECT2,HOMER2,PDK4,…
GO:BP	positive regulation of autophagy	GO:0010508	0.00100835	2.99639	99	1256	23	17231	TRIM21,FBXO7,TRIM34,SPTLC2,TRIM5,TBK1,HIF1A,RIPK2,LOC616948,C8H9ORF72,NOD1,PIK3C2A,PRKAA2,LRRK2,FYCO1,CALCOCO2,SH3GLB1,UFL1,ATF6,BAG3,VPS13D,WAC,LOC516599
GO:BP	B cell homeostasis	GO:0001782	0.00101453	2.99374	25	1256	11	17231	CD74,TNFSF13B,ADA,ABL1,BCL10,HIF1A,TRAF3IP2,RC3H2,BCL2L11,TNFAIP3,PPP2R3C
GO:BP	response to leukemia inhibitory factor	GO:1990823	0.0010294	2.98742	78	1256	20	17231	SBNO2,TRIM25,SOCS3,RNF125,ARID5B,PML,GCLM,KLF4,EPS8,NRP2,ABCD4,SPRY2,KLF5,KDM3A,HK2,B3GNT2,RIF1,SNX10,VEGFC,SMARCA5
GO:BP	negative regulation of cell death	GO:0060548	0.00105659	2.97609	688	1256	86	17231	CSF1,SOCS3,ADAR,GCLC,THBS1,BCL3,CD74,EIF2AK2,MCL1,AIFM2,CASP8,FAS,BIRC3,RIPK1,ADA,IL7,GOLPH3,FBXO7,RTKN2,IFIT3,HGF,BIRC2,CEBPB,ARL6IP1,GCLM,KLF4,BFAR,TIGAR,RFFL,IL2RB,PTK2,CFLAR,ABL1,STXBP1,ITGA6,RBCK1,XIAP,DOCK8,BCL10,SIX1,SH3RF2,DDX3X,HIF1A,STK40,KRT18,HDAC1,ITCH,SPRY2,STRADB,ITGB1,NCOA7,ING2,PELI1,RNF31,SGK3,FFAR4,GSK3B,MET,PRKCI,MDM4,PDK4,PRKAA2,LRRK2,EGFR,SETX,ITGAV,PIK3CA,ATAD5,YAP1,BCL2A1,…
GO:BP	positive regulation of defense response	GO:0031349	0.00106258	2.97364	145	1256	29	17231	NLRC5,IRF7,PARP9,TLR4,ZBP1,NMI,IFI16,CD47,CGAS,LOC101905041,TNFRSF1A,RIPK1,PVR,CEBPB,C3,LDLR,TBK1,RIPK2,NECTIN2,NAPEPLD,IL12A,EREG,NOD1,IFI35,SNX4,MAVS,IL18RAP,IRF3,MED1
GO:BP	regulation of autophagy	GO:0010506	0.00108749	2.96358	203	1256	36	17231	STAT3,TRIM21,DRAM1,MCL1,FBXO7,DRAM2,TRIM34,TIGAR,SPTLC2,TRIM5,TBK1,HIF1A,RIPK2,USP33,LOC616948,ATM,C8H9ORF72,NOD1,WDR24,PIK3C2A,PRKAA2,LRRK2,EIF4G2,RASIP1,FYCO1,SMG1,CALCOCO2,SH3GLB1,VPS13C,UFL1,ATF6,BAG3,VPS13D,WAC,LOC516599,RMC1
GO:BP	regulation of cellular biosynthetic process	GO:0031326	0.00113861	2.94362	3272	1256	306	17231	IRF8,NLRC5,CIITA,IRF1,STAT3,SBNO2,PARP14,ZNFX1,TRIM25,STAT2,IRF9,FST,IRF7,DTX3L,TEAD4,TRIM21,TRIM16,SLFN11,STAT1,TLR4,GCLC,THBS1,BCL3,CD74,ARHGEF5,EIF2AK2,ATP8B1,ATF3,ARID5B,MAFF,SMAD1,NAMPT,DAB2IP,TNFRSF1A,SP110,ID1,RIPK1,KLF6,DYRK2,TRIM38,ZFP36,PARP3,BACH1,PPP1R15B,ARID5A,RTKN2,CDK17,PPARD,PCGF5,INHBA,DAXX,HGF,LRP8,MAPRE3,SPP1,ZFP36L1,CEBPB,ZGPAT,PML,RNASEL,ZBTB38,TRIM14,C3,TXNIP,IPPK,TBX21,SP3…
GO:BP	small GTPase mediated signal transduction	GO:0007264	0.0011873	2.92544	358	1256	53	17231	CSF1,STARD13,DOCK9,RRAS2,STARD8,ARHGAP28,EPHB2,RAB33B,EPS8,CD2AP,RASSF1,RND3,RAP2A,ABL1,DOCK8,KCTD10,ARHGAP24,BCAR3,SPRY2,ITGB1,CDON,RAB30,F2RL2,SIPA1L3,ROCK2,DENND4C,RTN4R,MET,NCKAP1,DOCK4,CDC42SE2,RALGPS2,OGT,NRAS,DOCK7,ARFGEF1,GPSM2,RB1,RASIP1,RALGAPB,PDPN,AKAP13,TNFAIP1,RASA1,ARHGEF12,RAB4B,ARHGAP17,DENND3,RABGEF1,KPNB1,DENND4A,BRAP,CHM
GO:BP	regulation of protein ubiquitination	GO:0031396	0.00122985	2.91015	154	1256	30	17231	DTX3L,NMI,BIRC3,DAXX,BIRC2,SENP2,N4BP1,ISG15,PARP10,ABL1,XIAP,BCL10,SH3RF2,DDX3X,INAVA,RIPK2,SPRY2,PELI1,MASTL,LRRK2,OGT,TRIM44,NXN,UFL1,TNFAIP3,BRCA1,AMER1,CDC20B,MYCBP2,NDFIP2
GO:BP	organonitrogen compound catabolic process	GO:1901565	0.00142061	2.84753	1017	1256	116	17231	RNF19B,TRIM25,DTX3L,RNF122,UBA7,RNF125,SAMHD1,DAB2IP,CASP8,CDADC1,NT5E,USP18,RIPK1,ADA,PSMB10,FBXO7,PMAIP1,PSMB9,PML,SAT1,OAT,TBX21,DESI1,FBXL14,PSMB8,ERAP1,ATP2B4,AZIN1,N4BP1,RNF114,FITM2,BFAR,ISG15,RFFL,LDLR,KCTD6,RBCK1,CTSS,TRIB2,USP9X,UBR1,KCTD10,SH3RF2,SDS,TRIB1,HSPA8,LNPEP,ITCH,NUDT4,USP33,USP15,ATM,PELI1,CYLD,NUDT7,USP42,USP34,VPS36,USP32,PAOX,GSK3B,PSME1,PIAS1,RC3H2,GLA,LRRK2,OGT,ANKIB1,S…
GO:BP	programmed necrotic cell death	GO:0097300	0.00145912	2.83591	36	1256	13	17231	ZBP1,CASP8,FAS,BIRC3,RIPK1,BIRC2,CFLAR,RBCK1,PELI1,CYLD,RNF31,IRF3,TRPM7
GO:BP	positive regulation of cell differentiation	GO:0045597	0.00160412	2.79476	570	1256	74	17231	STAT3,CSF1,SOCS3,TRIM16,STAT1,CD74,SMAD1,TGM2,BOLA-DRA,CASP8,RIPK1,ADA,IL7,ZFP36,INHBA,LRP8,NEDD9,ZFP36L1,EPHB2,SEMA7A,CEBPB,SOCS1,IL6ST,TNFSF9,ISG15,NUMBL,ABL1,SAV1,DUSP10,SIX1,HIF1A,TRIB1,EDN1,KLF10,PROM1,RIPK2,STK3,HDAC1,KLF5,CDON,NAPEPLD,SPAG9,SCIN,FFAR4,ASXL2,RUNX2,CAPRIN1,DCSTAMP,GJA1,PRKCI,ECT2,JADE2,ANXA1,GOLGA4,RB1,EGR2,SMAP1,CLIC1,CRK,BMPR2,YAP1,SEMA4D,PDPN,NUDT21,SHB,ZBTB7C,UFL1,BMPR1B…
GO:BP	positive regulation of interferon-alpha production	GO:0032727	0.00160619	2.7942	17	1256	9	17231	IRF7,STAT1,TLR4,IFIH1,TBK1,DDX3X,MAVS,IRF3,DHX9
GO:BP	regulation of macromolecule biosynthetic process	GO:0010556	0.00161391	2.79212	3172	1256	297	17231	IRF8,NLRC5,CIITA,IRF1,STAT3,SBNO2,PARP14,ZNFX1,TRIM25,STAT2,IRF9,FST,IRF7,DTX3L,TEAD4,TRIM21,TRIM16,SLFN11,STAT1,TLR4,GCLC,THBS1,BCL3,CD74,ARHGEF5,EIF2AK2,ATP8B1,ATF3,ARID5B,MAFF,SMAD1,NAMPT,DAB2IP,TNFRSF1A,SP110,ID1,RIPK1,TMEM106A,KLF6,DYRK2,TRIM38,ZFP36,PARP3,BACH1,PPP1R15B,ARID5A,RTKN2,CLTC,CDK17,PPARD,PCGF5,INHBA,DAXX,HGF,LRP8,MAPRE3,SPP1,ZFP36L1,CEBPB,ZGPAT,PML,RNASEL,ZBTB38,TRIM14,TXNIP,IPP…
GO:BP	necroptotic process	GO:0070266	0.00163735	2.78586	31	1256	12	17231	ZBP1,CASP8,FAS,BIRC3,RIPK1,BIRC2,CFLAR,RBCK1,PELI1,CYLD,RNF31,TRPM7
GO:BP	antigen processing and presentation of peptide or polysaccharide antigen via MHC class II	GO:0002504	0.00164274	2.78443	26	1256	11	17231	THBS1,CD74,BOLA-DRB3,BOLA-DRA,BOLA-DMB,LOC100848815,BLA-DQB,BOLA-DMA,CTSS,BOLA-DQA5,BOLA-DQA2
GO:BP	positive regulation of cell death	GO:0010942	0.00165511	2.78117	381	1256	55	17231	RNF122,SLFN11,TLR4,THBS1,PHLDA1,ZBP1,ATF3,ARL6IP5,TGM2,MCL1,DAB2IP,IFIT2,AIFM2,FAS,TNFRSF1A,TNFSF10,RIPK1,PMAIP1,TNFRSF10D,INHBA,DAXX,PML,LTBR,TIGAR,ANO6,DCUN1D3,ABL1,SAV1,ITGA6,RBCK1,BCL10,DDX3X,RIPK2,STK3,ITGB1,SCIN,ATM,CYLD,IL12A,GSK3B,PRKCI,ECT2,BCLAF1,ANXA1,LRRK2,RYBP,NACC2,APC,FNIP1,PTPN2,FBH1,ATF6,BCL2L11,BMPR1B,TCTN3
GO:BP	cell cycle phase transition	GO:0044770	0.00176698	2.75277	353	1256	52	17231	ADAMTS1,SLFN11,RIPK1,FBXO7,BACH1,CDK17,INHBA,ZFP36L1,PML,ATP2B4,KLF4,EPS8,DCUN1D3,DDX3X,CTC1,CRLF3,EIF2AK4,ITGB1,CENPE,ATM,MASTL,TMOD3,PSME1,ZFP36L2,NEK6,ANXA1,KMT2E,NACC2,INO80,TIMELESS,EGFR,USP37,RB1,SPDYA,ATAD5,CTDSP1,TICRR,APC,ATR,FEM1B,TAF2,BRCA1,PTPN11,RAD1,INTS7,ATRIP,GEN1,DOT1L,NDC80,DBF4,TAOK1,BLM
GO:BP	cellular response to virus	GO:0098586	0.00176835	2.75243	48	1256	15	17231	ADAR,RNF125,IFIH1,LGALS8,DDX3X,PUM1,HIF1A,USP15,DHX58,IL12A,NLRX1,FMR1,SEC14L1,IRF3,RNF135
GO:BP	stress-activated MAPK cascade	GO:0051403	0.00183152	2.73719	165	1256	31	17231	TLR4,EIF2AK2,ARL6IP5,DAB2IP,FAS,RIPK1,ZFP36,HGF,ZFP36L1,LTBR,RELL1,RAP2A,AIDA,DUSP10,SH3RF2,INAVA,MAGI3,TRIB1,RIPK2,STK3,ITCH,STRADB,SPAG9,CYLD,PJA2,NOD1,EGFR,MAP4K4,FKTN,MAP3K13,TAOK1
GO:BP	regulation of cellular macromolecule biosynthetic process	GO:2000112	0.00185683	2.73123	3152	1256	295	17231	IRF8,NLRC5,CIITA,IRF1,STAT3,SBNO2,PARP14,ZNFX1,TRIM25,STAT2,IRF9,FST,IRF7,DTX3L,TEAD4,TRIM21,TRIM16,SLFN11,STAT1,TLR4,GCLC,THBS1,BCL3,CD74,ARHGEF5,EIF2AK2,ATP8B1,ATF3,ARID5B,MAFF,SMAD1,NAMPT,DAB2IP,TNFRSF1A,SP110,ID1,RIPK1,KLF6,DYRK2,TRIM38,ZFP36,PARP3,BACH1,PPP1R15B,ARID5A,RTKN2,CDK17,PPARD,PCGF5,INHBA,DAXX,HGF,LRP8,MAPRE3,SPP1,ZFP36L1,CEBPB,ZGPAT,PML,RNASEL,ZBTB38,TRIM14,TXNIP,IPPK,TBX21,SP3,E2…
GO:BP	positive regulation of response to biotic stimulus	GO:0002833	0.00188254	2.72525	95	1256	22	17231	NLRC5,IRF7,PARP9,TLR4,ZBP1,NMI,IFI16,CGAS,PVR,TBK1,PUM1,NECTIN2,USP15,DHX58,IL12A,EREG,IFI35,MR1,MAVS,IL18RAP,IRF3,MED1
GO:BP	blood vessel morphogenesis	GO:0048514	0.0019821	2.70287	432	1256	60	17231	ADAMTS1,STAT3,STAT1,THBS1,STARD13,PDE3B,SMAD1,DAB2IP,HS6ST1,ZFP36L1,EPHB2,SPRED1,PML,SAT1,C3,E2F8,ATP2B4,KLF4,MYO1E,AMOTL1,PTK2,FOXJ2,LDLR,ABL1,E2F2,SEC24B,NRP2,SIX1,GAB1,HIF1A,EDN1,ITGB8,SPRY2,ELK3,ITGB1,KLF5,ESM1,ROCK2,CLIC4,IL12A,PIK3C2A,PRDM1,ANXA1,HK2,QKI,ITGAV,RASIP1,TIPARP,BMPR2,YAP1,SHB,RASA1,VEGFC,BRCA1,PARVA,SP1,MED1,RORA,VEZF1,CHI3L1
GO:BP	positive regulation of immune response	GO:0050778	0.00200123	2.6987	364	1256	53	17231	NLRC5,IRF7,ICOSLG,PARP9,TLR4,CD74,ZBP1,NMI,IFI16,CGAS,BOLA-DRA,TNFSF13B,ADA,ARID5A,PLEKHA1,PVR,LOC618733,PTPRJ,C3,TBX21,ABL1,RBCK1,TBK1,BCL10,C2,RIPK2,NECTIN2,IL1R1,FYB1,LOC107131209,MASP1,IL12A,EREG,IFI35,MR1,RC3H2,ANXA1,SNX4,MAVS,C1S,LOC786065,TNFRSF21,ATAD5,RIF1,IL18RAP,SHB,PTPN2,PDE4B,BCAR1,IRF3,DENND1B,MED1,RABGEF1
GO:BP	extrinsic apoptotic signaling pathway via death domain receptors	GO:0008625	0.00205701	2.68676	61	1256	17	17231	THBS1,ATF3,DAB2IP,CASP8,PMAIP1,TNFRSF10D,HGF,RFFL,CFLAR,DDX3X,STK3,GSK3B,BAG3,FEM1B,TNFAIP3,BMPR1B,BRCA1
GO:BP	nucleobase-containing compound metabolic process	GO:0006139	0.00208238	2.68144	4629	1256	411	17231	IRF8,NLRC5,CIITA,IRF1,STAT3,SBNO2,PARP14,ZNFX1,TRIM25,STAT2,IRF9,FST,IRF7,OAS1Y,DTX3L,GTF2B,TEAD4,TRIM21,TRIM16,ADAR,SLFN11,STAT1,TLR4,ISG20,GCLC,BCL3,ZC3HAV1,CD74,ARHGEF5,CMPK2,EIF2AK2,ATP8B1,NMI,ATF3,ARID5B,VCPIP1,SAMHD1,MAFF,SMAD1,CGAS,NAMPT,DAB2IP,TNFRSF1A,PNP,CDADC1,NT5E,SP110,ID1,CARHSP1,RIPK1,ADA,UMPS,KLF6,TRIM38,ZFP36,PARP3,BACH1,ACSL5,ARID5A,RTKN2,TXNL4B,CDK17,CMTR2,PPARD,PRORSD1,PCGF5,I…
GO:BP	positive regulation of developmental process	GO:0051094	0.00212442	2.67276	904	1256	105	17231	STAT3,CSF1,FST,SOCS3,TEAD4,TRIM16,STAT1,THBS1,CD74,SMAD1,CGAS,TGM2,BOLA-DRA,DAB2IP,CASP8,TNFRSF1A,B4GALT5,TNFSF13B,RIPK1,ADA,IL7,ZFP36,PPARD,INHBA,LRP8,NEDD9,ZFP36L1,EPHB2,SEMA7A,CEBPB,C3,SOCS1,TBX21,IL6ST,TNFSF9,KLF4,ISG15,ANO6,NUMBL,ABL1,ATP2B1,SAV1,DUSP10,SIX1,GAB1,HIF1A,TRIB1,EDN1,KLF10,PROM1,ADAM9,RIPK2,ITGB8,STK3,HDAC1,ITGB1,KLF5,CDON,NAPEPLD,SPAG9,SCIN,FFAR4,ASXL2,RUNX2,CAPRIN1,DCSTAMP,GJA…
GO:BP	regulation of hydrolase activity	GO:0051336	0.00224378	2.64902	916	1256	106	17231	STAT3,OAS1Y,THBS1,ARHGEF5,STARD13,ARL6IP5,DAB2IP,CASP8,FAS,ITGA1,STARD8,BIRC3,RGS16,ARHGAP28,EGLN3,TNFSF10,PMAIP1,PPP1R15B,PSMB9,SNX18,HGF,NEDD9,BIRC2,SPRED1,LOC100298356,PML,OAS1X,C3,ARAP2,ARL6IP1,PSMB8,NMUR2,KLF4,LOC112441507,RFFL,CSRNP2,CFLAR,ABL1,RICTOR,ITGA6,XIAP,DOCK8,BCL10,SH3RF2,USP6NL,PPP4R2,DDX3X,ARHGAP24,RIPK2,BCAR3,KNL1,HDAC1,GNAQ,SPRY2,ITGB1,LOC107131209,LRCH1,SRGAP1,ABCE1,SIPA1L3,RO…
GO:BP	intracellular receptor signaling pathway	GO:0030522	0.00230641	2.63706	192	1256	34	17231	STAT3,TRIM16,TLR4,RNF125,IFIH1,TIFA,PPARD,DAXX,PML,HNF4G,INAVA,PUM1,RIPK2,ASXL1,HDAC1,USP15,KDM3A,PIAS2,ASXL2,DHX58,NLRX1,YAP1,TRIM24,NR3C1,UFL1,TMF1,SEC14L1,ERBIN,TNFAIP3,BRCA1,RNF135,MED1,RORA,NEDD4
GO:BP	regulation of cell cycle phase transition	GO:1901987	0.00239186	2.62126	263	1256	42	17231	ADAMTS1,SLFN11,RIPK1,FBXO7,ZFP36L1,PML,ATP2B4,KLF4,DCUN1D3,DDX3X,CTC1,EIF2AK4,CENPE,ATM,TMOD3,PSME1,ZFP36L2,NEK6,ANXA1,KMT2E,NACC2,INO80,TIMELESS,EGFR,RB1,ATAD5,CTDSP1,TICRR,APC,ATR,FEM1B,BRCA1,PTPN11,RAD1,INTS7,ATRIP,GEN1,DOT1L,NDC80,DBF4,TAOK1,BLM
GO:BP	positive regulation of protein kinase activity	GO:0045860	0.0024068	2.61856	347	1256	51	17231	CSF1,TLR4,THBS1,ARHGEF5,EIF2AK2,DAB2IP,RIPK1,DAXX,HGF,LRP8,MAPRE3,NEDD9,SOCS1,ATP2B4,NUP107,PTK2,ABL1,RICTOR,DDX3X,INAVA,EDN1,ADAM9,RIPK2,STK3,STRADB,MAP2K6,CENPE,SPAG9,IQGAP1,NRG1,MAP4K5,EREG,ABI1,ECT2,LRRK2,GPRC5A,CCNT2,EGFR,SPDYA,CEMIP,CAB39,MAP4K4,VEGFC,PTPN11,PPP2R3C,AFAP1L2,MAP3K13,DBF4,TAOK1,OSBPL8,CHI3L1
GO:BP	antigen processing and presentation of endogenous antigen	GO:0019883	0.00244641	2.61147	32	1256	12	17231	TAP1,BOLA-DRA,ERAP2,LOC618733,LOC616942,ERAP1,BOLA,TAPBP,LOC512672,BOLA-NC1,JSP.1,IDE
GO:BP	regulation of type I interferon-mediated signaling pathway	GO:0060338	0.00258972	2.58675	27	1256	11	17231	NLRC5,IRF7,ADAR,ZBP1,SAMHD1,ISG15,TBK1,MAVS,PTPN2,IRF3,CNOT7
GO:BP	negative regulation of immune system process	GO:0002683	0.00282653	2.54875	283	1256	44	17231	NLRC5,IRF1,PARP14,TRIM21,ADAR,THBS1,RNF125,CD74,NMI,SAMHD1,SDC4,TAPBPL,ADA,FBXO7,PARP3,CD274,CEBPB,PTPRJ,SOCS1,TBX21,PAG1,UBASH3B,ISG15,LDLR,DUSP10,TRIB1,ITCH,LRCH1,PELI1,DHX58,RC3H2,ANXA1,NLRX1,TNFRSF21,LGALS9,ARG2,WASL,PTPN2,SEC14L1,TNFAIP3,CNOT7,RABGEF1,ZNF397,TMBIM6
GO:BP	response to lipid	GO:0033993	0.00288992	2.53911	427	1256	59	17231	IRF8,STAT3,SBNO2,TRIM16,TLR4,CYP24A1,CMPK2,DAB2IP,ZFP36,ARID5A,CD274,PPARD,DAXX,SPP1,ZFP36L1,CEBPB,HNF4G,KLF4,GRAMD1C,LDLR,ABL1,DUSP10,BCL10,TRIB1,ADAM9,RIPK2,ASXL1,HDAC1,KDM3A,ROCK2,ATM,PELI1,PIAS2,IL12A,NRIP1,ZFP36L2,PDK4,ANXA1,PLSCR4,GDAP2,ABHD2,EGFR,SETX,CD14,YAP1,MSN,TRIM24,NR3C1,UFL1,TMF1,PDE4B,ERBIN,IRF3,TNFAIP3,BRCA1,MED1,RORA,SOCS2,NEDD4
GO:BP	cellular localization	GO:0051641	0.00307281	2.51246	2151	1256	212	17231	TAP1,STAT3,DTX3L,PNKD,CD74,RTP4,VCPIP1,ATAD1,ARL6IP5,KIF2C,TNFRSF1A,ATP9A,RAB8B,GOLPH3,ZFP36,FBXO7,PARP3,CLTC,LOC112443175,SNX18,RAB20,VPS54,MAPRE3,PVR,ZFP36L1,PML,LOC781710,ARFRP1,TXNIP,NAPB,GBP5,DESI1,STX1A,ARL6IP1,SNX16,ZC3H11A,ATP2B4,STXBP3,STX11,CMTM6,MX2,UBASH3B,RAB33B,NUP107,TRAPPC8,MYO1E,IPO7,CD2AP,MORC3,RANBP2,RAP2A,TWF1,ZDHHC23,SLC39A8,LDLR,ABL1,STXBP1,WASHC4,RAB27A,HEATR5B,SAV1,SEC24B,…
GO:BP	positive regulation of programmed cell death	GO:0043068	0.00311966	2.50589	350	1256	51	17231	RNF122,THBS1,PHLDA1,ZBP1,ATF3,ARL6IP5,TGM2,MCL1,DAB2IP,IFIT2,AIFM2,FAS,TNFRSF1A,TNFSF10,RIPK1,PMAIP1,TNFRSF10D,INHBA,PML,LTBR,TIGAR,ANO6,DCUN1D3,ABL1,SAV1,ITGA6,RBCK1,BCL10,DDX3X,RIPK2,STK3,ITGB1,SCIN,ATM,CYLD,IL12A,PRKCI,ECT2,BCLAF1,ANXA1,LRRK2,RYBP,NACC2,APC,FNIP1,PTPN2,FBH1,ATF6,BCL2L11,BMPR1B,TCTN3
GO:BP	positive regulation of kinase activity	GO:0033674	0.00330434	2.48092	409	1256	57	17231	CSF1,TLR4,THBS1,CD74,ARHGEF5,EIF2AK2,DAB2IP,RIPK1,DAXX,HGF,LRP8,MAPRE3,NEDD9,EPHB2,SOCS1,ATP2B4,NUP107,TIGAR,RANBP2,PTK2,ABL1,RICTOR,BCL10,DDX3X,INAVA,EDN1,ADAM9,RIPK2,STK3,STRADB,MAP2K6,CENPE,SPAG9,IQGAP1,NRG1,MAP4K5,EREG,ABI1,ECT2,LRRK2,GPRC5A,CCNT2,EGFR,SPDYA,CEMIP,CAB39,MAP4K4,VEGFC,PTPN11,PPP2R3C,AFAP1L2,MAP3K13,LMTK2,DBF4,TAOK1,OSBPL8,CHI3L1
GO:BP	stress-activated protein kinase signaling cascade	GO:0031098	0.00336586	2.4729	178	1256	32	17231	TLR4,EIF2AK2,ARL6IP5,DAB2IP,FAS,RIPK1,ZFP36,HGF,ZFP36L1,LTBR,RELL1,NUP107,RAP2A,AIDA,DUSP10,SH3RF2,INAVA,MAGI3,TRIB1,RIPK2,STK3,ITCH,STRADB,SPAG9,CYLD,PJA2,NOD1,EGFR,MAP4K4,FKTN,MAP3K13,TAOK1
GO:BP	positive regulation of phosphorylation	GO:0042327	0.00337774	2.47137	665	1256	82	17231	PARP14,CSF1,TLR4,THBS1,CD74,ARHGEF5,EIF2AK2,DAB2IP,FAS,TNFRSF1A,RIPK1,INHBA,DAXX,HGF,LRP8,MAPRE3,NEDD9,EPHB2,SEMA7A,C3,SOCS1,ATP2B4,IL6ST,NUP107,TIGAR,SDCBP,SLC4A4,RANBP2,RAP2A,PTK2,ABL1,RICTOR,ITGA6,LRRK1,BCL10,DDX3X,INAVA,EDN1,ADAM9,RIPK2,BCAR3,STK3,SPRY2,STRADB,MAP2K6,CENPE,CDON,SPAG9,ROCK2,IQGAP1,NRG1,IL12A,MAP4K5,EREG,ABI1,ECT2,LRRK2,DOCK7,GPRC5A,CCNT2,EGFR,MAVS,PIK3CA,SPDYA,BMPR2,SEMA4D,CEM…
GO:BP	modification-dependent macromolecule catabolic process	GO:0043632	0.00342128	2.46581	530	1256	69	17231	RNF19B,TRIM25,DTX3L,RNF122,UBA7,RNF125,USP18,FBXO7,PML,TBX21,DESI1,FBXL14,N4BP1,RNF114,BFAR,ISG15,RFFL,KCTD6,RBCK1,TRIB2,USP9X,UBR1,KCTD10,SH3RF2,TRIB1,PNPT1,ITCH,USP33,USP15,PELI1,CYLD,USP42,USP34,VPS36,USP32,GSK3B,PIAS1,RC3H2,LRRK2,OGT,ANKIB1,STT3B,RYBP,USP37,FBXO33,USP31,MAN1A1,NEDD4L,STYX,USP25,RNF150,UFL1,FBXL18,HACE1,UBA6,TNFAIP1,PSMA2,TNFAIP3,RNF217,CDC20B,SIAH1,UBE4A,WAC,ANAPC10,MIB1,USP2…
GO:BP	positive regulation of innate immune response	GO:0045089	0.00362256	2.44098	70	1256	18	17231	NLRC5,IRF7,PARP9,TLR4,ZBP1,NMI,IFI16,CGAS,PVR,TBK1,NECTIN2,IL12A,EREG,IFI35,MAVS,IL18RAP,IRF3,MED1
GO:BP	regulation of multicellular organismal development	GO:2000026	0.00391807	2.40693	927	1256	106	17231	IRF1,ADAMTS1,STAT3,CSF1,FST,TRIM16,STAT1,THBS1,CD74,PDE3B,MAFF,SMAD1,TGM2,BOLA-DRA,DAB2IP,CASP8,TNFRSF1A,B4GALT5,RIPK1,ADA,IL7,ZFP36,FBXO7,PPARD,INHBA,LRP8,ZFP36L1,EPHB2,SEMA7A,SPRED1,CEBPB,PML,C3,SOCS1,TBX21,ATP2B4,IL6ST,TNFSF9,UBASH3B,KLF4,BCOR,ISG15,ANO6,NUMBL,FOXJ2,LDLR,ABL1,ATP2B1,SAV1,E2F2,DUSP10,SIX1,GAB1,HIF1A,TRIB1,EDN1,KLF10,PROM1,RIPK2,ITGB8,HDAC1,SPRY2,ITGB1,SCIN,ROCK2,RUNX2,RTN4R,CAP…
GO:BP	negative regulation of innate immune response	GO:0045824	0.0041726	2.37959	39	1256	13	17231	NLRC5,PARP14,TRIM21,ADAR,NMI,SAMHD1,ISG15,DUSP10,DHX58,NLRX1,PTPN2,TNFAIP3,CNOT7
GO:BP	negative regulation of phosphorylation	GO:0042326	0.00426347	2.37024	278	1256	43	17231	STAT3,PARP14,SOCS3,ADAR,DAB2IP,FBXO7,PPP1R15B,DUSP16,HGF,MVP,EPHB2,SPRED1,PTPRJ,SOCS1,UBASH3B,TIGAR,ABL1,AIDA,DUSP10,LRRK1,TRIB1,DUSP5,GNAQ,SPRY2,C8H9ORF72,LRRK2,RB1,RASIP1,HDAC4,SEMA4D,CTDSP1,APC,SHB,PTPN2,SPRED3,TNFAIP3,KAT2B,PARVA,ERRFI1,PARD6A,RABGEF1,PIK3IP1,CHORDC1
GO:BP	positive regulation of response to external stimulus	GO:0032103	0.00444164	2.35246	260	1256	41	17231	NLRC5,CSF1,IRF7,PARP9,TLR4,THBS1,CD74,ZBP1,NMI,IFI16,CD47,CGAS,LOC101905041,TNFRSF1A,RIPK1,PVR,CEBPB,C3,ANO6,PTK2,LDLR,TBK1,PUM1,RIPK2,NECTIN2,USP15,NAPEPLD,DHX58,IL12A,MET,EREG,NOD1,IFI35,SNX4,MAVS,BMPR2,IL18RAP,IRF3,VEGFC,MED1,LGMN
GO:BP	RNA metabolic process	GO:0016070	0.00457931	2.3392	3815	1256	345	17231	IRF8,NLRC5,CIITA,IRF1,STAT3,SBNO2,PARP14,ZNFX1,TRIM25,STAT2,IRF9,FST,IRF7,OAS1Y,DTX3L,GTF2B,TEAD4,TRIM21,TRIM16,ADAR,STAT1,TLR4,ISG20,GCLC,BCL3,ZC3HAV1,CD74,ARHGEF5,EIF2AK2,ATP8B1,NMI,ATF3,ARID5B,MAFF,SMAD1,NAMPT,DAB2IP,TNFRSF1A,SP110,ID1,CARHSP1,RIPK1,KLF6,TRIM38,ZFP36,BACH1,ARID5A,RTKN2,TXNL4B,CDK17,CMTR2,PPARD,PRORSD1,PCGF5,INHBA,DAXX,LRP8,MAPRE3,SPP1,ZFP36L1,CEBPB,ZGPAT,PML,RNASEL,ZBTB38,TRIM…
GO:BP	modification-dependent protein catabolic process	GO:0019941	0.00487136	2.31235	525	1256	68	17231	RNF19B,TRIM25,DTX3L,RNF122,UBA7,RNF125,USP18,FBXO7,PML,TBX21,DESI1,FBXL14,N4BP1,RNF114,BFAR,ISG15,RFFL,KCTD6,RBCK1,TRIB2,USP9X,UBR1,KCTD10,SH3RF2,TRIB1,ITCH,USP33,USP15,PELI1,CYLD,USP42,USP34,VPS36,USP32,GSK3B,PIAS1,RC3H2,LRRK2,OGT,ANKIB1,STT3B,RYBP,USP37,FBXO33,USP31,MAN1A1,NEDD4L,STYX,USP25,RNF150,UFL1,FBXL18,HACE1,UBA6,TNFAIP1,PSMA2,TNFAIP3,RNF217,CDC20B,SIAH1,UBE4A,WAC,ANAPC10,MIB1,USP24,SMUR…
GO:BP	positive regulation of transferase activity	GO:0051347	0.00523964	2.2807	465	1256	62	17231	CSF1,DTX3L,TLR4,THBS1,CD74,ARHGEF5,EIF2AK2,DAB2IP,RIPK1,DAXX,HGF,LRP8,MAPRE3,NEDD9,EPHB2,SOCS1,ATP2B4,KLF4,NUP107,TIGAR,RANBP2,PTK2,ABL1,RICTOR,BCL10,DDX3X,INAVA,EDN1,ADAM9,RIPK2,STK3,STRADB,MAP2K6,CENPE,TNKS,SPAG9,IQGAP1,NRG1,MASTL,MAP4K5,EREG,ABI1,ECT2,LRRK2,GPRC5A,CCNT2,EGFR,SPDYA,CEMIP,CAB39,MAP4K4,VEGFC,PTPN11,CDC20B,PPP2R3C,AFAP1L2,MAP3K13,LMTK2,DBF4,TAOK1,OSBPL8,CHI3L1
GO:BP	positive regulation of apoptotic process	GO:0043065	0.00529652	2.27601	337	1256	49	17231	RNF122,THBS1,PHLDA1,ATF3,ARL6IP5,TGM2,MCL1,DAB2IP,IFIT2,AIFM2,FAS,TNFRSF1A,TNFSF10,RIPK1,PMAIP1,TNFRSF10D,INHBA,PML,LTBR,TIGAR,ANO6,DCUN1D3,ABL1,SAV1,ITGA6,RBCK1,BCL10,DDX3X,RIPK2,STK3,ITGB1,SCIN,ATM,CYLD,IL12A,PRKCI,ECT2,BCLAF1,ANXA1,RYBP,NACC2,APC,FNIP1,PTPN2,FBH1,ATF6,BCL2L11,BMPR1B,TCTN3
GO:BP	G1/S transition of mitotic cell cycle	GO:0000082	0.00531691	2.27434	116	1256	24	17231	ADAMTS1,SLFN11,RIPK1,FBXO7,BACH1,CDK17,INHBA,PML,KLF4,DCUN1D3,DDX3X,CRLF3,ITGB1,PSME1,ANXA1,KMT2E,NACC2,INO80,EGFR,USP37,RB1,SPDYA,CTDSP1,APC
GO:BP	enzyme linked receptor protein signaling pathway	GO:0007167	0.00538112	2.26913	737	1256	88	17231	STAT3,CSF1,FST,SOCS3,THBS1,ARID5B,SMAD1,DAB2IP,ITGA1,OSMR,BTBD11,SOSTDC1,INHBA,HGF,PLEKHA1,NEDD9,MVP,TNS2,EPHB2,SPRED1,PML,PTPRJ,TXNIP,SOCS1,IL6ST,FAM83B,UBASH3B,MYO1E,SDCBP,PTK2,ABL1,USP9X,NRP2,GAB1,HIF1A,IGFBP3,ADAM9,ITGB8,BCAR3,ZFAND5,SPRY2,IRS1,USP15,PTPN12,RHBDF2,ING2,ESM1,IQGAP1,NRG1,RUNX2,IL12A,GSK3B,NCEH1,MET,EREG,JADE2,PDK4,OGT,NLK,EID2,EGFR,SETX,PIK3CA,CRK,PELO,TIPARP,BMPR2,ZNF106,APC,P…
GO:BP	protein mono-ADP-ribosylation	GO:0140289	0.00546838	2.26214	11	1256	7	17231	PARP14,PARP9,PARP3,PARP8,PARP12,PARP10,TIPARP
GO:BP	positive regulation of extrinsic apoptotic signaling pathway	GO:2001238	0.0057711	2.23874	40	1256	13	17231	THBS1,ATF3,TNFSF10,RIPK1,PMAIP1,INHBA,PML,LTBR,RBCK1,BCL10,STK3,CYLD,BMPR1B
GO:BP	regulation of cell cycle process	GO:0010564	0.00598535	2.22291	477	1256	63	17231	ADAMTS1,SLFN11,DAB2IP,RIPK1,FBXO7,PARP3,CLTC,ZFP36L1,PML,E2F8,ATP2B4,KLF4,DCUN1D3,KIF11,DDX3X,CTC1,EDN1,EIF2AK4,CENPE,TNKS,ROCK2,ATM,SVIL,KLHL21,EREG,TMOD3,ECT2,PSME1,ZFP36L2,NEK6,ANXA1,KMT2E,NACC2,INO80,TIMELESS,GPSM2,EGFR,RB1,ATAD5,PKN2,DYNC1H1,SH3GLB1,CTDSP1,TICRR,APC,ATR,UBXN2B,FEM1B,KAT2B,BRCA1,PTPN11,RAD1,INTS7,KLHL9,MED1,ATRIP,GEN1,DOT1L,NDC80,CHORDC1,DBF4,TAOK1,BLM
GO:BP	negative regulation of protein phosphorylation	GO:0001933	0.00617099	2.20965	245	1256	39	17231	PARP14,SOCS3,ADAR,DAB2IP,FBXO7,PPP1R15B,DUSP16,HGF,MVP,EPHB2,SPRED1,PTPRJ,SOCS1,UBASH3B,ABL1,AIDA,DUSP10,LRRK1,TRIB1,DUSP5,GNAQ,SPRY2,C8H9ORF72,LRRK2,RB1,RASIP1,SEMA4D,CTDSP1,APC,SHB,PTPN2,SPRED3,TNFAIP3,KAT2B,PARVA,ERRFI1,PARD6A,RABGEF1,CHORDC1
GO:BP	heterocycle metabolic process	GO:0046483	0.00624642	2.20437	4727	1256	415	17231	IRF8,NLRC5,CIITA,IRF1,STAT3,SBNO2,PARP14,ZNFX1,TRIM25,STAT2,IRF9,FST,IRF7,OAS1Y,DTX3L,GTF2B,TEAD4,TRIM21,TRIM16,ADAR,SLFN11,STAT1,TLR4,ISG20,GCLC,BCL3,ZC3HAV1,CD74,ARHGEF5,CMPK2,EIF2AK2,ATP8B1,NMI,ATF3,ARID5B,VCPIP1,SAMHD1,MAFF,SMAD1,CGAS,NAMPT,DAB2IP,TNFRSF1A,PNP,CDADC1,NT5E,SP110,ID1,CARHSP1,RIPK1,ADA,UMPS,KLF6,TRIM38,ZFP36,PARP3,BACH1,ACSL5,ARID5A,RTKN2,MTHFD2,TXNL4B,CDK17,CMTR2,PPARD,PRORSD1,…
GO:BP	cell migration	GO:0016477	0.00626518	2.20307	1127	1256	123	17231	ADAMTS1,STAT3,CSF1,FAM110C,ITGA2,THBS1,CD74,ARHGEF5,STARD13,ARID5B,LIMA1,RRAS2,DAB2IP,ITGA1,CLDN1,SDC4,ADA,GOLPH3,RHOBTB3,PPARD,HGF,LRP8,NEDD9,EPHB2,SEMA7A,SPRED1,PML,PTPRJ,TBX21,LGALS8,MGAT3,ATP2B4,DIXDC1,DCDC2,KLF4,EPS8,AMOTL1,ANO6,RND3,RAP2A,PTK2,ABL1,ITGA6,DUSP10,DOCK8,USP9X,SEMA3C,NRP2,SIX1,SH3RF2,GAB1,HIF1A,TRIB1,EDN1,ARHGAP24,ADAM9,ITGB8,IL1R1,SLC12A2,ZFAND5,SPRY2,ITGB1,USP33,LRCH1,SRGAP1,…
GO:BP	organelle organization	GO:0006996	0.00631693	2.19949	3284	1256	302	17231	ZNFX1,DTX3L,GTF2B,TRIM16,ARHGEF5,STARD13,CNN3,FLNB,ATP8B1,LIMA1,VCPIP1,KIF2C,PTPDC1,AIFM2,STARD8,ARHGAP28,TNFSF10,SDC4,RAB8B,GOLPH3,RHOBTB3,FBXO7,PARP3,PMAIP1,ARID5A,CLTC,PCGF5,RAB20,VPS54,DAXX,HGF,MAPRE3,NEDD9,PVR,PML,SMG6,ARL6IP1,GCLM,TOP1,DIXDC1,CLIP1,SLC16A1,TRIP10,DCDC2,MX2,RAB33B,NUP107,FOXJ3,TRAPPC8,MYO1E,FHDC1,FITM2,JAK2,PTGFRN,BCOR,EPS8,AMOTL1,CD2AP,MAST4,TIGAR,MIER1,SDCBP,RASSF1,RND3,RA…
GO:BP	negative regulation of gene expression	GO:0010629	0.0064313	2.1917	708	1256	85	17231	STAT3,PARP14,PARP9,ADAR,TLR4,THBS1,BCL3,RNF125,ZC3HAV1,EIF2AK2,NMI,CARHSP1,RIPK1,ZFP36,PARP3,HGF,ZFP36L1,PML,RNASEL,TBX21,SMG6,ATP2B4,N4BP1,KLF4,MRPL44,CD2AP,XRN2,MIER1,LDLR,PARP10,ATP2B1,TBK1,XIAP,TRIB2,DDX3X,PUM1,MC1R,HIF1A,PNPT1,ITGB8,HDAC1,TRAF3IP2,MOV10,FFAR4,DHX58,IL12A,XRN1,HOMER2,ZFP36L2,PRDM1,RC3H2,ANXA1,ZC3H7B,PRKAA2,NLRX1,LRRK2,EGFR,RB1,SMG1,PELO,TNFRSF21,TIPARP,YAP1,LGALS9,ARG2,RIF1,F…
GO:BP	Ras protein signal transduction	GO:0007265	0.00658664	2.18134	264	1256	41	17231	CSF1,STARD13,RRAS2,STARD8,EPHB2,RAB33B,EPS8,RASSF1,RAP2A,ABL1,KCTD10,ARHGAP24,SPRY2,ITGB1,RAB30,F2RL2,ROCK2,DENND4C,RTN4R,MET,NCKAP1,CDC42SE2,RALGPS2,OGT,NRAS,ARFGEF1,GPSM2,RB1,RASIP1,PDPN,AKAP13,TNFAIP1,RASA1,ARHGEF12,RAB4B,ARHGAP17,DENND3,RABGEF1,KPNB1,DENND4A,BRAP
GO:BP	leukocyte activation	GO:0045321	0.00718978	2.14328	646	1256	79	17231	IRF8,IRF1,STAT3,SBNO2,TLR4,THBS1,BCL3,CD74,NMI,CD47,CGAS,BOLA-DRA,SDC4,TNFSF13B,ADA,TMEM106A,IL7,PSMB10,FBXO7,PARP3,CD274,PVR,ZFP36L1,EPHB2,CEBPB,SOCS1,TBX21,SP3,BATF2,EXO1,PAG1,LTBR,IL6ST,STXBP3,TNFSF9,LDLR,ABL1,DUSP10,TBK1,DOCK8,BCL10,ADAM9,RIPK2,ITGB8,NECTIN2,ITCH,TRAF3IP2,ATM,PELI1,RUNX2,PJA2,IL12A,DCSTAMP,IFI35,ZFP36L2,PRDM1,MR1,RC3H2,ANXA1,KMT2E,SNX4,CDH17,HECTD1,TNFRSF21,ATAD5,LGALS9,MSN,A…
GO:BP	positive regulation of protein phosphorylation	GO:0001934	0.0072821	2.13774	604	1256	75	17231	PARP14,CSF1,TLR4,THBS1,CD74,ARHGEF5,EIF2AK2,DAB2IP,FAS,TNFRSF1A,RIPK1,INHBA,DAXX,HGF,LRP8,MAPRE3,NEDD9,SEMA7A,C3,SOCS1,ATP2B4,IL6ST,NUP107,SDCBP,RAP2A,PTK2,ABL1,RICTOR,LRRK1,DDX3X,INAVA,EDN1,ADAM9,RIPK2,BCAR3,STK3,SPRY2,STRADB,MAP2K6,CENPE,CDON,SPAG9,ROCK2,IQGAP1,NRG1,IL12A,MAP4K5,EREG,ABI1,ECT2,LRRK2,DOCK7,GPRC5A,CCNT2,EGFR,MAVS,PIK3CA,SPDYA,BMPR2,SEMA4D,CEMIP,CAB39,FMR1,FNIP1,FBH1,MAP4K4,VEGFC,…
GO:BP	protein poly-ADP-ribosylation	GO:0070212	0.00730641	2.1363	8	1256	6	17231	PARP14,PARP9,PARP3,PARP10,TNKS,TNKS2
GO:BP	antigen processing and presentation of endogenous peptide antigen via MHC class I	GO:0019885	0.00730641	2.1363	8	1256	6	17231	TAP1,ERAP2,LOC618733,ERAP1,TAPBP,IDE
GO:BP	peptidyl-amino acid modification	GO:0018193	0.00740115	2.1307	1063	1256	117	17231	PARP14,SOCS3,GTF2B,TRIM16,CD74,IFIH1,TNFRSF1A,EGLN3,RIPK1,IL7,DYRK2,ARID5A,HGF,LRP8,NEDD9,MVP,EPHB2,SPRED1,SOCS1,DESI1,STX1A,SENP2,TOP1,ATP2B4,IL6ST,JAK2,BCOR,MAST4,MORC3,RANBP2,PRMT9,TWF1,ZDHHC23,PTK2,ABL1,RICTOR,TBK1,LRRK1,RIPK2,BCAR3,SPRY2,TNKS,NCOA7,KDM3A,TTBK2,ROCK2,PIAS2,SGK3,NRG1,TMX3,MASTL,IL12A,GSK3B,MET,EREG,ABI1,PRKCI,DR1,PIAS1,JADE2,NEK6,FKBP5,KMT2E,PRKAA2,LRRK2,OGT,STT3B,DOCK7,MGAT2,…
GO:BP	positive regulation of phosphorus metabolic process	GO:0010562	0.0076064	2.11882	711	1256	85	17231	PARP14,CSF1,TLR4,THBS1,CD74,ARHGEF5,EIF2AK2,DAB2IP,FAS,TNFRSF1A,ITGA1,RIPK1,PPP1R15B,INHBA,DAXX,HGF,LRP8,MAPRE3,NEDD9,EPHB2,SEMA7A,C3,SOCS1,ATP2B4,IL6ST,NUP107,TIGAR,SDCBP,SLC4A4,RANBP2,RAP2A,PTK2,ABL1,RICTOR,ITGA6,LRRK1,BCL10,DDX3X,INAVA,EDN1,ADAM9,RIPK2,BCAR3,STK3,SPRY2,STRADB,MAP2K6,CENPE,CDON,SPAG9,ROCK2,CHP1,IQGAP1,NRG1,IL12A,MAP4K5,EREG,ABI1,ECT2,LRRK2,DOCK7,GPRC5A,CCNT2,EGFR,MAVS,PIK3CA,SP…
GO:BP	positive regulation of phosphate metabolic process	GO:0045937	0.0076064	2.11882	711	1256	85	17231	PARP14,CSF1,TLR4,THBS1,CD74,ARHGEF5,EIF2AK2,DAB2IP,FAS,TNFRSF1A,ITGA1,RIPK1,PPP1R15B,INHBA,DAXX,HGF,LRP8,MAPRE3,NEDD9,EPHB2,SEMA7A,C3,SOCS1,ATP2B4,IL6ST,NUP107,TIGAR,SDCBP,SLC4A4,RANBP2,RAP2A,PTK2,ABL1,RICTOR,ITGA6,LRRK1,BCL10,DDX3X,INAVA,EDN1,ADAM9,RIPK2,BCAR3,STK3,SPRY2,STRADB,MAP2K6,CENPE,CDON,SPAG9,ROCK2,CHP1,IQGAP1,NRG1,IL12A,MAP4K5,EREG,ABI1,ECT2,LRRK2,DOCK7,GPRC5A,CCNT2,EGFR,MAVS,PIK3CA,SP…
GO:BP	gene expression	GO:0010467	0.00816667	2.08795	5025	1256	437	17231	IRF8,NLRC5,CIITA,IRF1,STAT3,SBNO2,PARP14,CSF1,ZNFX1,TRIM25,STAT2,IRF9,FST,IRF7,DTX3L,GTF2B,ICOSLG,PARP9,TEAD4,TRIM21,TRIM16,ADAR,STAT1,TLR4,GCLC,THBS1,BCL3,RNF125,ZC3HAV1,CD74,ARHGEF5,IFIH1,EIF2AK2,ATP8B1,NMI,ATF3,ARID5B,CD47,SAMHD1,MAFF,SMAD1,CGAS,LOC101905041,NAMPT,DAB2IP,TICAM2,DDX58,CASP8,TNFRSF1A,SP110,ID1,CARHSP1,RIPK1,TMEM106A,KLF6,IL7,TRIM38,GOLPH3,ZFP36,OAS2,PARP3,BACH1,PPP1R15B,ARID5A,R…
GO:BP	regulation of DNA-binding transcription factor activity	GO:0051090	0.0086713	2.06192	314	1256	46	17231	NLRC5,TRIM25,TRIM21,TLR4,ARHGEF5,EIF2AK2,ARID5B,DAB2IP,ID1,RIPK1,TRIM38,RTKN2,LRP8,TRIM14,TRIM34,KLF4,PPRC1,PARP10,SAV1,TRIM5,RBCK1,BCL10,TRIB1,EDN1,RIPK2,STK3,ITCH,LOC785873,LOC616948,PELI1,CHP1,CYLD,NOD1,PRKCI,MED13,MAVS,HDAC4,FOXS1,IL18RAP,UFL1,ERBIN,TNFAIP3,DHX9,LOC516599,MAP3K13,IKBKB
GO:BP	negative regulation of phosphorus metabolic process	GO:0010563	0.00868619	2.06117	382	1256	53	17231	STAT3,PARP14,SOCS3,ADAR,DAB2IP,FBXO7,PPP1R15B,DUSP16,HGF,MVP,EPHB2,SPRED1,PTPRJ,SOCS1,UBASH3B,TIGAR,CSRNP2,ABL1,AIDA,DUSP10,LRRK1,SH3RF2,TRIB1,DUSP5,KNL1,GNAQ,SPRY2,ROCK2,C8H9ORF72,CHP1,IQGAP1,MASTL,LRRK2,RB1,RASIP1,HDAC4,SEMA4D,CTDSP1,APC,SHB,PTPN2,SPRED3,TNFAIP3,KAT2B,PARVA,ERRFI1,PARD6A,FKBP15,RABGEF1,LMTK2,PIK3IP1,CHORDC1,IKBKB
GO:BP	negative regulation of phosphate metabolic process	GO:0045936	0.00868619	2.06117	382	1256	53	17231	STAT3,PARP14,SOCS3,ADAR,DAB2IP,FBXO7,PPP1R15B,DUSP16,HGF,MVP,EPHB2,SPRED1,PTPRJ,SOCS1,UBASH3B,TIGAR,CSRNP2,ABL1,AIDA,DUSP10,LRRK1,SH3RF2,TRIB1,DUSP5,KNL1,GNAQ,SPRY2,ROCK2,C8H9ORF72,CHP1,IQGAP1,MASTL,LRRK2,RB1,RASIP1,HDAC4,SEMA4D,CTDSP1,APC,SHB,PTPN2,SPRED3,TNFAIP3,KAT2B,PARVA,ERRFI1,PARD6A,FKBP15,RABGEF1,LMTK2,PIK3IP1,CHORDC1,IKBKB
GO:BP	negative regulation of apoptotic process	GO:0043066	0.00897094	2.04716	618	1256	76	17231	SOCS3,ADAR,GCLC,THBS1,BCL3,CD74,EIF2AK2,MCL1,FAS,BIRC3,RIPK1,ADA,IL7,GOLPH3,RTKN2,IFIT3,HGF,BIRC2,CEBPB,ARL6IP1,GCLM,KLF4,BFAR,RFFL,IL2RB,PTK2,CFLAR,ABL1,STXBP1,ITGA6,XIAP,DOCK8,BCL10,SIX1,SH3RF2,DDX3X,HIF1A,STK40,KRT18,HDAC1,ITCH,SPRY2,STRADB,ITGB1,ING2,SGK3,FFAR4,GSK3B,PRKCI,MDM4,PDK4,PRKAA2,LRRK2,EGFR,SETX,ITGAV,PIK3CA,ATAD5,YAP1,BCL2A1,ARG2,RRM2B,HIPK3,FNIP1,TMF1,BAG3,RASA1,MAP4K4,TNFAIP3,PHI…
GO:BP	ubiquitin-dependent protein catabolic process	GO:0006511	0.00918809	2.03677	514	1256	66	17231	RNF19B,TRIM25,DTX3L,RNF122,RNF125,USP18,FBXO7,PML,TBX21,DESI1,FBXL14,N4BP1,RNF114,BFAR,RFFL,KCTD6,RBCK1,TRIB2,USP9X,UBR1,KCTD10,SH3RF2,TRIB1,ITCH,USP33,USP15,PELI1,CYLD,USP42,USP34,VPS36,USP32,GSK3B,PIAS1,RC3H2,LRRK2,OGT,ANKIB1,STT3B,RYBP,USP37,FBXO33,USP31,MAN1A1,NEDD4L,STYX,USP25,RNF150,UFL1,FBXL18,HACE1,UBA6,TNFAIP1,PSMA2,TNFAIP3,RNF217,CDC20B,SIAH1,UBE4A,WAC,ANAPC10,MIB1,USP24,SMURF2,SMURF1,N…
GO:BP	regulation of stress-activated MAPK cascade	GO:0032872	0.00990235	2.00426	128	1256	25	17231	TLR4,EIF2AK2,ARL6IP5,DAB2IP,FAS,RIPK1,HGF,LTBR,RELL1,RAP2A,AIDA,DUSP10,SH3RF2,INAVA,MAGI3,RIPK2,STK3,ITCH,CYLD,PJA2,NOD1,EGFR,MAP4K4,FKTN,TAOK1
GO:BP	tumor necrosis factor production	GO:0032640	0.0104268	1.98185	97	1256	21	17231	STAT3,TLR4,THBS1,BCL3,IFIH1,CD47,RIPK1,TMEM106A,ZFP36,OAS2,ARID5A,EPHB2,MC1R,RIPK2,NOD1,MAVS,CD14,ARG2,TNFAIP3,DHX9,PTPN11
GO:BP	regulation of tumor necrosis factor production	GO:0032680	0.0104268	1.98185	97	1256	21	17231	STAT3,TLR4,THBS1,BCL3,IFIH1,CD47,RIPK1,TMEM106A,ZFP36,OAS2,ARID5A,EPHB2,MC1R,RIPK2,NOD1,MAVS,CD14,ARG2,TNFAIP3,DHX9,PTPN11
GO:BP	necrotic cell death	GO:0070265	0.010668	1.97192	42	1256	13	17231	ZBP1,CASP8,FAS,BIRC3,RIPK1,BIRC2,CFLAR,RBCK1,PELI1,CYLD,RNF31,IRF3,TRPM7
GO:BP	negative regulation of immune response	GO:0050777	0.0114069	1.94283	113	1256	23	17231	NLRC5,PARP14,TRIM21,ADAR,RNF125,NMI,SAMHD1,PARP3,TBX21,ISG15,DUSP10,ITCH,DHX58,RC3H2,ANXA1,NLRX1,ARG2,PTPN2,SEC14L1,TNFAIP3,CNOT7,RABGEF1,ZNF397
GO:BP	fat cell differentiation	GO:0045444	0.0117323	1.93062	171	1256	30	17231	ARID5B,ZFP36,PPARD,ZFP36L1,CEBPB,RNASEL,SOCS1,PSMB8,KLF4,SAV1,DUSP10,TRIB2,SIX1,ASXL1,STK3,KLF5,NAPEPLD,NUDT7,FFAR4,ASXL2,PIAS1,ZFP36L2,EGR2,YAP1,LRRC8C,ZBTB7C,MED1,RORA,OSBPL8,LAMA4
GO:BP	cellular aromatic compound metabolic process	GO:0006725	0.0120852	1.91775	4782	1256	417	17231	IRF8,NLRC5,CIITA,IRF1,STAT3,SBNO2,PARP14,ZNFX1,TRIM25,STAT2,IRF9,FST,IRF7,OAS1Y,DTX3L,GTF2B,TEAD4,TRIM21,TRIM16,ADAR,SLFN11,STAT1,TLR4,PNKD,ISG20,GCLC,BCL3,ZC3HAV1,CD74,ARHGEF5,CMPK2,EIF2AK2,ATP8B1,NMI,ATF3,ARID5B,VCPIP1,SAMHD1,MAFF,SMAD1,CGAS,NAMPT,DAB2IP,TNFRSF1A,PNP,CDADC1,NT5E,SP110,ID1,CARHSP1,RIPK1,ADA,UMPS,KLF6,TRIM38,ZFP36,PARP3,BACH1,ACSL5,ARID5A,RTKN2,MTHFD2,TXNL4B,CDK17,CMTR2,PPARD,PRO…
GO:BP	intestinal epithelial cell development	GO:0060576	0.0122948	1.91028	12	1256	7	17231	IL6ST,TIGAR,HIF1A,KLF5,PRDM1,YAP1,YIPF6
GO:BP	protein auto-ADP-ribosylation	GO:0070213	0.0122948	1.91028	12	1256	7	17231	PARP3,PARP8,PARP12,PARP10,TNKS,TNKS2,TIPARP
GO:BP	regulation of hemopoiesis	GO:1903706	0.0123488	1.90837	252	1256	39	17231	IRF1,STAT3,CSF1,STAT1,CD74,BOLA-DRA,CASP8,RIPK1,ADA,IL7,ZFP36,FBXO7,INHBA,ZFP36L1,CEBPB,SOCS1,TBX21,TNFSF9,UBASH3B,ISG15,ABL1,DUSP10,HIF1A,TRIB1,KLF10,RIPK2,SCIN,DCSTAMP,ZFP36L2,PRDM1,RC3H2,ANXA1,RB1,SMAP1,SHB,PTPN2,PPP2R3C,MED1,ZNF397
GO:BP	interleukin-6 production	GO:0032635	0.0123711	1.90759	98	1256	21	17231	TLR4,CD74,IFIH1,CD47,TICAM2,TMEM106A,ARID5A,HGF,CEBPB,INAVA,RIPK2,IL17RC,EREG,NOD1,NLRX1,MAVS,TNFAIP3,DHX9,PTPN11,AFAP1L2,RABGEF1
GO:BP	regulation of interleukin-6 production	GO:0032675	0.0123711	1.90759	98	1256	21	17231	TLR4,CD74,IFIH1,CD47,TICAM2,TMEM106A,ARID5A,HGF,CEBPB,INAVA,RIPK2,IL17RC,EREG,NOD1,NLRX1,MAVS,TNFAIP3,DHX9,PTPN11,AFAP1L2,RABGEF1
GO:BP	regulation of pattern recognition receptor signaling pathway	GO:0062207	0.0128712	1.89038	76	1256	18	17231	IRF1,IRF7,TLR4,RNF125,DAB2IP,OTUD4,GPR108,DDX3X,PUM1,USP15,PELI1,DHX58,PJA2,IFI35,NLRX1,SEC14L1,ERBIN,TNFAIP3
GO:BP	response to peptide hormone	GO:0043434	0.013007	1.88582	207	1256	34	17231	STAT3,STAT2,SOCS3,TRIM16,STAT1,RAB8B,ZFP36L1,TNS2,SOCS1,STXBP3,PTK2,ATP2B1,IGFBP3,BCAR3,IRS1,RAB31,DENND4C,GSK3B,PRKCI,PDK4,ANXA1,LPIN2,OGT,ZNF106,APC,VPS13C,PTPN2,KAT2B,PHIP,PTPN11,AHCYL1,C2CD5,SOCS2,OSBPL8
GO:BP	negative regulation of extrinsic apoptotic signaling pathway	GO:2001237	0.0130913	1.88302	69	1256	17	17231	MCL1,RIPK1,IL7,HGF,GCLM,RFFL,CFLAR,ITGA6,DDX3X,STRADB,SGK3,GSK3B,ITGAV,YAP1,TNFAIP3,PHIP,BRCA1
GO:BP	transmembrane receptor protein tyrosine kinase signaling pathway	GO:0007169	0.0130944	1.88292	468	1256	61	17231	STAT3,CSF1,SOCS3,THBS1,ARID5B,DAB2IP,ITGA1,HGF,PLEKHA1,NEDD9,MVP,TNS2,EPHB2,PTPRJ,TXNIP,SOCS1,FAM83B,UBASH3B,MYO1E,PTK2,ABL1,NRP2,GAB1,HIF1A,IGFBP3,BCAR3,ZFAND5,SPRY2,IRS1,PTPN12,RHBDF2,ESM1,IQGAP1,NRG1,RUNX2,IL12A,GSK3B,MET,EREG,PDK4,OGT,EGFR,SETX,PIK3CA,CRK,TIPARP,ZNF106,APC,PTPN2,BCAR1,PHIP,VEGFC,PTPN11,ERRFI1,AFAP1L2,RABGEF1,LMTK2,SOCS2,YES1,LGMN,OSBPL8
GO:BP	protein modification by small protein removal	GO:0070646	0.0132056	1.87924	130	1256	25	17231	TRIM21,VCPIP1,USP18,OTUD4,DESI1,SENP2,USP9X,ATXN7,ASXL1,ITCH,USP33,USP15,CYLD,USP42,USP34,USP32,USP37,USP31,SENP5,USP53,USP25,LOC782101,TNFAIP3,USP24,OTUB2
GO:BP	cellular response to lipid	GO:0071396	0.013289	1.87651	319	1256	46	17231	IRF8,SBNO2,TLR4,CMPK2,DAB2IP,ZFP36,ARID5A,CD274,DAXX,SPP1,ZFP36L1,HNF4G,GRAMD1C,LDLR,ABL1,BCL10,TRIB1,ADAM9,RIPK2,HDAC1,KDM3A,ROCK2,ATM,PIAS2,NRIP1,ZFP36L2,PDK4,ANXA1,PLSCR4,ABHD2,EGFR,SETX,CD14,YAP1,MSN,TRIM24,NR3C1,UFL1,TMF1,PDE4B,IRF3,TNFAIP3,BRCA1,MED1,RORA,NEDD4
GO:BP	cellular response to oxygen-containing compound	GO:1901701	0.0133732	1.87376	743	1256	87	17231	IRF8,STAT3,SBNO2,SOCS3,TLR4,CMPK2,TGM2,DAB2IP,RIPK1,RAB8B,GOLPH3,ZFP36,SOD2,ARID5A,CD274,HGF,PLEKHA1,SPP1,ZFP36L1,TNS2,CEBPB,SOCS1,ATP2B4,GRAMD1C,PTK2,LDLR,ABL1,ATP2B1,UBR1,BCL10,HIF1A,TRIB1,ADAM9,RIPK2,BCAR3,GNAQ,IRS1,RAB31,CACNA2D1,ROCK2,ATM,DENND4C,RDH11,GSK3B,NRIP1,MET,NOD1,PRKCI,ECT2,PDK4,ANXA1,PLSCR4,PRKAA2,LPIN2,LRRK2,OGT,EGFR,SETX,PIK3CA,CD14,YAP1,MSN,TRIM24,NR3C1,ZNF106,APC,CDH1,PTPN2,PD…
GO:BP	signal transduction	GO:0007165	0.0136026	1.86638	5402	1256	464	17231	NLRC5,IRF1,STAT3,PARP14,CSF1,TRIM25,FAM110C,STAT2,IL15RA,TUBB3,FST,IRF7,SOCS3,IFNAR2,ITGA2,DTX3L,ICOSLG,PARP9,PLCH1,TEAD4,TRIM21,TRIM16,MX1,ADAR,STAT1,TLR4,THBS1,BCL3,RNF125,CDKN2AIP,CD74,ARHGEF5,IFIH1,STARD13,ZBP1,DOCK9,IFIT5,EIF2AK2,PDE3B,CISH,NMI,ATF3,ARID5B,RRAS2,SAMHD1,SMAD1,CGAS,ARL6IP5,LOC101905041,NAMPT,TGM2,MCL1,DAB2IP,PTPDC1,TICAM2,CASP8,FAS,TNFRSF1A,ITGA1,OSMR,STARD8,RGS16,ARHGAP28,TNF…
GO:BP	organic cyclic compound metabolic process	GO:1901360	0.0143442	1.84332	4933	1256	428	17231	IRF8,NLRC5,CIITA,IRF1,STAT3,SBNO2,PARP14,ZNFX1,TRIM25,STAT2,IRF9,FST,IRF7,OAS1Y,DTX3L,GTF2B,TEAD4,TRIM21,TRIM16,ADAR,SLFN11,STAT1,TLR4,CYP24A1,PNKD,ISG20,GCLC,BCL3,ZC3HAV1,CD74,ARHGEF5,CMPK2,EIF2AK2,ATP8B1,NMI,ATF3,ARID5B,VCPIP1,SAMHD1,MAFF,SMAD1,CGAS,NAMPT,DAB2IP,TNFRSF1A,PNP,CDADC1,NT5E,SP110,ID1,CARHSP1,RIPK1,ADA,UMPS,KLF6,TRIM38,ZFP36,PARP3,BACH1,ACSL5,ARID5A,RTKN2,MTHFD2,TXNL4B,CDK17,CMTR2,P…
GO:BP	RNA biosynthetic process	GO:0032774	0.0144917	1.83888	2952	1256	273	17231	IRF8,NLRC5,CIITA,IRF1,STAT3,SBNO2,PARP14,ZNFX1,TRIM25,STAT2,IRF9,FST,IRF7,DTX3L,GTF2B,TEAD4,TRIM21,TRIM16,STAT1,TLR4,GCLC,BCL3,CD74,ARHGEF5,EIF2AK2,ATP8B1,NMI,ATF3,ARID5B,MAFF,SMAD1,NAMPT,DAB2IP,TNFRSF1A,SP110,ID1,RIPK1,KLF6,TRIM38,ZFP36,BACH1,ARID5A,RTKN2,CDK17,PPARD,PCGF5,INHBA,DAXX,LRP8,MAPRE3,SPP1,CEBPB,ZGPAT,PML,RNASEL,ZBTB38,TRIM14,TXNIP,IPPK,TBX21,SP3,E2F8,BATF2,TRIM34,ETS2,HIVEP2,RFX5,HNF…
GO:BP	regulation of necrotic cell death	GO:0010939	0.0147188	1.83213	26	1256	10	17231	ZBP1,CASP8,BIRC3,RIPK1,BIRC2,CFLAR,RBCK1,PELI1,CYLD,RNF31
GO:BP	adaptive immune response	GO:0002250	0.0147621	1.83085	282	1256	42	17231	TAP1,STAT3,IRF7,BCL3,CD74,BOLA-DRB3,BOLA-DRA,BOLA-DMB,TNFSF13B,ADA,PARP3,ARID5A,LOC100848815,PVR,LOC618733,C3,TBX21,BLA-DQB,EXO1,BOLA-DMA,DUSP10,CTSS,BCL10,C2,RIPK2,NECTIN2,IL1R1,TRAF3IP2,LOC107131209,BOLA-DQA5,IL12A,MR1,RC3H2,ANXA1,BOLA-DQA2,C1S,TNFRSF21,ATAD5,RIF1,TNFAIP3,DENND1B,RORA
GO:BP	regulation of stress-activated protein kinase signaling cascade	GO:0070302	0.0152084	1.81792	131	1256	25	17231	TLR4,EIF2AK2,ARL6IP5,DAB2IP,FAS,RIPK1,HGF,LTBR,RELL1,RAP2A,AIDA,DUSP10,SH3RF2,INAVA,MAGI3,RIPK2,STK3,ITCH,CYLD,PJA2,NOD1,EGFR,MAP4K4,FKTN,TAOK1
GO:BP	transcription, DNA-templated	GO:0006351	0.0154875	1.81002	2942	1256	272	17231	IRF8,NLRC5,CIITA,IRF1,STAT3,SBNO2,PARP14,ZNFX1,TRIM25,STAT2,IRF9,FST,IRF7,DTX3L,GTF2B,TEAD4,TRIM21,TRIM16,STAT1,TLR4,GCLC,BCL3,CD74,ARHGEF5,EIF2AK2,ATP8B1,NMI,ATF3,ARID5B,MAFF,SMAD1,NAMPT,DAB2IP,TNFRSF1A,SP110,ID1,RIPK1,KLF6,TRIM38,ZFP36,BACH1,ARID5A,RTKN2,CDK17,PPARD,PCGF5,INHBA,DAXX,LRP8,MAPRE3,SPP1,CEBPB,ZGPAT,PML,RNASEL,ZBTB38,TRIM14,TXNIP,IPPK,TBX21,SP3,E2F8,BATF2,TRIM34,ETS2,HIVEP2,RFX5,HNF…
GO:BP	regulation of DNA replication	GO:0006275	0.0156664	1.80503	77	1256	18	17231	SLFN11,ZBTB38,E2F8,CTC1,BCAR3,MCIDAS,PDS5A,EREG,INO80,TIMELESS,EGFR,USP37,ATAD5,TICRR,ATR,DHX9,DBF4,BLM
GO:BP	nucleic acid-templated transcription	GO:0097659	0.0159068	1.79842	2943	1256	272	17231	IRF8,NLRC5,CIITA,IRF1,STAT3,SBNO2,PARP14,ZNFX1,TRIM25,STAT2,IRF9,FST,IRF7,DTX3L,GTF2B,TEAD4,TRIM21,TRIM16,STAT1,TLR4,GCLC,BCL3,CD74,ARHGEF5,EIF2AK2,ATP8B1,NMI,ATF3,ARID5B,MAFF,SMAD1,NAMPT,DAB2IP,TNFRSF1A,SP110,ID1,RIPK1,KLF6,TRIM38,ZFP36,BACH1,ARID5A,RTKN2,CDK17,PPARD,PCGF5,INHBA,DAXX,LRP8,MAPRE3,SPP1,CEBPB,ZGPAT,PML,RNASEL,ZBTB38,TRIM14,TXNIP,IPPK,TBX21,SP3,E2F8,BATF2,TRIM34,ETS2,HIVEP2,RFX5,HNF…
GO:BP	peptidyl-serine phosphorylation	GO:0018105	0.0159243	1.79794	264	1256	40	17231	RIPK1,DYRK2,HGF,TOP1,ATP2B4,MAST4,MORC3,RICTOR,TBK1,RIPK2,BCAR3,SPRY2,TNKS,TTBK2,ROCK2,SGK3,MASTL,GSK3B,PRKCI,NEK6,PRKAA2,LRRK2,DOCK7,NLK,EGFR,PIK3CA,SMG1,PKN2,STK38L,CAB39,HIPK3,FNIP1,ATR,RPS6KA3,UHMK1,MAP3K13,LMTK2,CSNK1G1,CSNK1G3,IKBKB
GO:BP	response to hormone	GO:0009725	0.0165202	1.78198	451	1256	59	17231	STAT3,TRIM25,STAT2,SOCS3,TRIM16,STAT1,GCLC,SLC34A2,RAB8B,ZFP36,ARID5A,PPARD,DAXX,ZFP36L1,TNS2,SOCS1,HNF4G,STXBP3,PTK2,ATP2B1,CTSS,UGCG,IGFBP3,BCAR3,HDAC1,IRS1,RAB31,KDM3A,PIAS2,DENND4C,GSK3B,PRKCI,ZFP36L2,PDK4,ANXA1,PRKAA2,LPIN2,OGT,ABHD2,YAP1,TRIM24,NR3C1,ZNF106,APC,VPS13C,PTPN2,UFL1,TMF1,KAT2B,PHIP,BRCA1,PTPN11,AHCYL1,RBBP5,C2CD5,MED1,SOCS2,NEDD4,OSBPL8
GO:BP	tube morphogenesis	GO:0035239	0.0170323	1.76873	629	1256	76	17231	ADAMTS1,STAT3,CSF1,STAT1,THBS1,STARD13,PDE3B,SMAD1,TGM2,DAB2IP,SDC4,SOSTDC1,HS6ST1,ZFP36L1,EPHB2,SPRED1,PML,SAT1,C3,TBX21,E2F8,ATP2B4,KLF4,MYO1E,AMOTL1,LUZP1,PTK2,FOXJ2,LDLR,ABL1,E2F2,SEC24B,NRP2,BCL10,SIX1,GAB1,HIF1A,EDN1,ITGB8,STK3,SPRY2,ELK3,ITGB1,KLF5,ESM1,ROCK2,CLIC4,IL12A,MET,PIK3C2A,PRDM1,TULP3,ANXA1,HK2,ADAMTS16,QKI,TIMELESS,ITGAV,RASIP1,HECTD1,TIPARP,BMPR2,YAP1,PDPN,SHB,BCL2L11,RASA1,VEG…
GO:BP	response to tumor necrosis factor	GO:0034612	0.0172238	1.76387	157	1256	28	17231	STAT1,DAB2IP,CASP8,FAS,TNFRSF1A,TNFSF13B,RIPK1,ZFP36,ZFP36L1,LOC781710,KRT8,RFFL,ADAM9,KRT18,TRAF3IP2,CYLD,CXCL16,DCSTAMP,ZFP36L2,YTHDC2,TNFRSF21,PTPN2,ERBIN,DHX9,BRCA1,RORA,CHI3L1,IKBKB
GO:BP	tumor necrosis factor superfamily cytokine production	GO:0071706	0.0172738	1.76261	100	1256	21	17231	STAT3,TLR4,THBS1,BCL3,IFIH1,CD47,RIPK1,TMEM106A,ZFP36,OAS2,ARID5A,EPHB2,MC1R,RIPK2,NOD1,MAVS,CD14,ARG2,TNFAIP3,DHX9,PTPN11
GO:BP	regulation of tumor necrosis factor superfamily cytokine production	GO:1903555	0.0172738	1.76261	100	1256	21	17231	STAT3,TLR4,THBS1,BCL3,IFIH1,CD47,RIPK1,TMEM106A,ZFP36,OAS2,ARID5A,EPHB2,MC1R,RIPK2,NOD1,MAVS,CD14,ARG2,TNFAIP3,DHX9,PTPN11
GO:BP	cell cycle G1/S phase transition	GO:0044843	0.017484	1.75736	132	1256	25	17231	ADAMTS1,SLFN11,RIPK1,FBXO7,BACH1,CDK17,INHBA,PML,ATP2B4,KLF4,DCUN1D3,DDX3X,CRLF3,ITGB1,PSME1,ANXA1,KMT2E,NACC2,INO80,EGFR,USP37,RB1,SPDYA,CTDSP1,APC
GO:BP	growth	GO:0040007	0.0176834	1.75243	619	1256	75	17231	STAT3,CSF1,CDKN2AIP,ARID5B,SMAD1,RIPK1,IL7,PPARD,INHBA,VPS54,PLEKHA1,ZFP36L1,TNS2,SEMA7A,PML,PTPRJ,SOCS1,PTGFRN,DCUN1D3,ABL1,SAV1,DUSP10,RAPH1,USP9X,NRP2,SIX1,DDX3X,HIF1A,CTC1,EDN1,IGFBP3,STK40,PNPT1,SERTAD1,STK3,CRLF3,SPRY2,ITGB1,KLF5,ATM,CLIC4,C8H9ORF72,IQGAP1,CXCL16,RTN4R,DCSTAMP,SBDS,JADE2,RC3H2,OSGIN2,ANXA1,GOLGA4,INO80,EGFR,RB1,EIF4G2,TNKS2,PIK3CA,FOXS1,PELO,NEDD4L,BMPR2,YAP1,SEMA4D,DCBLD2,…
GO:BP	regulation of locomotion	GO:0040012	0.0182067	1.73977	738	1256	86	17231	ADAMTS1,STAT3,CSF1,FAM110C,THBS1,CD74,STARD13,RRAS2,DAB2IP,CLDN1,SDC4,ADA,FBXO7,HGF,NEDD9,EPHB2,SEMA7A,SPRED1,PTPRJ,MGAT3,ATP2B4,KLF4,AMOTL1,ANO6,RAP2A,PTK2,ABL1,ITGA6,DUSP10,DOCK8,SEMA3C,SH3RF2,HIF1A,TRIB1,EDN1,ADAM9,IL1R1,SPRY2,ITGB1,LRCH1,SRGAP1,SPAG9,TTBK2,ROCK2,CLIC4,CXCL16,IL12A,MET,GJA1,PIK3C2A,DOCK4,ANXA1,LRRK2,DOCK7,ABHD2,SLK,EGFR,ITGAV,CRK,PKN2,BMPR2,SEMA4D,MSN,CEMIP,PDPN,APC,WASL,CDH1,…
GO:BP	immune effector process	GO:0002252	0.0182767	1.7381	422	1256	56	17231	IRF8,RNF19B,STAT3,SBNO2,IRF7,TLR4,BCL3,CD74,NMI,CGAS,BOLA-DRA,DDX58,ADA,PARP3,ARID5A,PVR,EPHB2,SEMA7A,LOC618733,C3,TBX21,EXO1,STXBP3,ABL1,DUSP10,BCL10,INAVA,C2,RIPK2,NECTIN2,IL1R1,LYST,TRAF3IP2,LOC107131209,MASP1,DHX58,IL12A,IFI35,MR1,RC3H2,ANXA1,KMT2E,SNX4,CDH17,C1S,IRAK4,DDX21,ATAD5,RIF1,IL18RAP,SHB,DENND1B,RABGEF1,RORA,ZNF397,TMBIM6
GO:BP	positive regulation of tumor necrosis factor production	GO:0032760	0.0191338	1.7182	57	1256	15	17231	STAT3,TLR4,THBS1,IFIH1,RIPK1,TMEM106A,OAS2,ARID5A,EPHB2,RIPK2,NOD1,MAVS,CD14,DHX9,PTPN11
GO:BP	regulation of GTPase activity	GO:0043087	0.0195206	1.70951	353	1256	49	17231	ARHGEF5,STARD13,DAB2IP,STARD8,RGS16,ARHGAP28,SNX18,NEDD9,ARAP2,RICTOR,ITGA6,DOCK8,USP6NL,ARHGAP24,BCAR3,GNAQ,SPRY2,ITGB1,LRCH1,SRGAP1,SIPA1L3,IQGAP1,TBC1D9,GSK3B,RTN4R,MET,ECT2,ASAP1,DOCK4,GAPVD1,MYO9A,LRRK2,DOCK7,ARFGEF1,EVI5,RASIP1,SMAP1,RALGAPB,CRK,SEMA4D,RIC8B,RASA1,ARHGEF12,PLEKHG6,DENND1B,ARHGAP17,SBF2,ARHGAP9,CHM
GO:BP	positive regulation of myeloid cell differentiation	GO:0045639	0.0197812	1.70375	71	1256	17	17231	STAT3,CSF1,STAT1,CD74,CASP8,RIPK1,INHBA,ZFP36L1,ISG15,HIF1A,TRIB1,KLF10,SCIN,DCSTAMP,RB1,SMAP1,MED1
GO:BP	regulation of transcription, DNA-templated	GO:0006355	0.0211407	1.67488	2804	1256	260	17231	IRF8,NLRC5,CIITA,IRF1,STAT3,SBNO2,PARP14,ZNFX1,TRIM25,STAT2,IRF9,FST,IRF7,DTX3L,TEAD4,TRIM21,TRIM16,STAT1,TLR4,GCLC,BCL3,CD74,ARHGEF5,EIF2AK2,ATP8B1,ATF3,ARID5B,MAFF,SMAD1,NAMPT,DAB2IP,TNFRSF1A,SP110,ID1,RIPK1,KLF6,TRIM38,ZFP36,BACH1,ARID5A,RTKN2,CDK17,PPARD,PCGF5,INHBA,DAXX,LRP8,MAPRE3,SPP1,CEBPB,ZGPAT,PML,RNASEL,ZBTB38,TRIM14,TXNIP,IPPK,TBX21,SP3,E2F8,BATF2,TRIM34,ETS2,HIVEP2,RFX5,HNF4G,DEPDC1,…
GO:BP	regulation of nucleic acid-templated transcription	GO:1903506	0.0217162	1.66322	2805	1256	260	17231	IRF8,NLRC5,CIITA,IRF1,STAT3,SBNO2,PARP14,ZNFX1,TRIM25,STAT2,IRF9,FST,IRF7,DTX3L,TEAD4,TRIM21,TRIM16,STAT1,TLR4,GCLC,BCL3,CD74,ARHGEF5,EIF2AK2,ATP8B1,ATF3,ARID5B,MAFF,SMAD1,NAMPT,DAB2IP,TNFRSF1A,SP110,ID1,RIPK1,KLF6,TRIM38,ZFP36,BACH1,ARID5A,RTKN2,CDK17,PPARD,PCGF5,INHBA,DAXX,LRP8,MAPRE3,SPP1,CEBPB,ZGPAT,PML,RNASEL,ZBTB38,TRIM14,TXNIP,IPPK,TBX21,SP3,E2F8,BATF2,TRIM34,ETS2,HIVEP2,RFX5,HNF4G,DEPDC1,…
GO:BP	regulation of interleukin-1 beta production	GO:0032651	0.0222334	1.65299	51	1256	14	17231	STAT3,TRIM16,TLR4,CASP8,TMEM106A,PML,GBP5,INAVA,RIPK2,FFAR4,PANX1,GSDMD,ARG2,TNFAIP3
GO:BP	interleukin-1 beta production	GO:0032611	0.0222334	1.65299	51	1256	14	17231	STAT3,TRIM16,TLR4,CASP8,TMEM106A,PML,GBP5,INAVA,RIPK2,FFAR4,PANX1,GSDMD,ARG2,TNFAIP3
GO:BP	anatomical structure formation involved in morphogenesis	GO:0048646	0.0224896	1.64802	830	1256	94	17231	ADAMTS1,STAT3,SBNO2,ITGA2,TEAD4,STAT1,THBS1,BCL3,STARD13,PDE3B,ATP8B1,SMAD1,TGM2,DAB2IP,SDC4,TNFSF13B,ADA,INHBA,HS6ST1,LRP8,PVR,EPHB2,SPRED1,PML,SAT1,C3,SP3,E2F8,FJX1,ATP2B4,KLF4,PTGFRN,AMOTL1,LUZP1,PTK2,FOXJ2,ABL1,E2F2,SEC24B,SEMA3C,NRP2,BCL10,SIX1,GAB1,HIF1A,EDN1,ADAM9,DUSP5,ITGB8,NECTIN2,STK3,HDAC1,SPRY2,ELK3,ITGB1,KLF5,CDON,MYOF,ESM1,ROCK2,ATM,CLIC4,IL12A,DCSTAMP,GJA1,ABI1,TMOD3,PIK3C2A,TULP3…
GO:BP	regulation of RNA biosynthetic process	GO:2001141	0.0229119	1.63994	2807	1256	260	17231	IRF8,NLRC5,CIITA,IRF1,STAT3,SBNO2,PARP14,ZNFX1,TRIM25,STAT2,IRF9,FST,IRF7,DTX3L,TEAD4,TRIM21,TRIM16,STAT1,TLR4,GCLC,BCL3,CD74,ARHGEF5,EIF2AK2,ATP8B1,ATF3,ARID5B,MAFF,SMAD1,NAMPT,DAB2IP,TNFRSF1A,SP110,ID1,RIPK1,KLF6,TRIM38,ZFP36,BACH1,ARID5A,RTKN2,CDK17,PPARD,PCGF5,INHBA,DAXX,LRP8,MAPRE3,SPP1,CEBPB,ZGPAT,PML,RNASEL,ZBTB38,TRIM14,TXNIP,IPPK,TBX21,SP3,E2F8,BATF2,TRIM34,ETS2,HIVEP2,RFX5,HNF4G,DEPDC1,…
GO:BP	interleukin-1 production	GO:0032612	0.0240849	1.61825	58	1256	15	17231	STAT3,TRIM16,TLR4,CASP8,TMEM106A,PML,GBP5,INAVA,RIPK2,FFAR4,PANX1,GSDMD,ANXA1,ARG2,TNFAIP3
GO:BP	regulation of interleukin-1 production	GO:0032652	0.0240849	1.61825	58	1256	15	17231	STAT3,TRIM16,TLR4,CASP8,TMEM106A,PML,GBP5,INAVA,RIPK2,FFAR4,PANX1,GSDMD,ANXA1,ARG2,TNFAIP3
GO:BP	regulation of small GTPase mediated signal transduction	GO:0051056	0.0242733	1.61487	186	1256	31	17231	CSF1,STARD13,STARD8,ARHGAP28,EPHB2,EPS8,CD2AP,ABL1,KCTD10,ARHGAP24,SPRY2,ITGB1,CDON,F2RL2,SIPA1L3,DENND4C,RTN4R,MET,CDC42SE2,RALGPS2,OGT,ARFGEF1,RASIP1,RALGAPB,AKAP13,TNFAIP1,RASA1,ARHGAP17,DENND3,RABGEF1,DENND4A
GO:BP	negative regulation of cell cycle process	GO:0010948	0.02453	1.6103	195	1256	32	17231	SLFN11,DAB2IP,RIPK1,FBXO7,ZFP36L1,PML,E2F8,KLF4,DCUN1D3,EIF2AK4,TNKS,ATM,ZFP36L2,NACC2,TIMELESS,RB1,CTDSP1,TICRR,APC,ATR,FEM1B,KAT2B,BRCA1,PTPN11,RAD1,INTS7,ATRIP,GEN1,DOT1L,NDC80,TAOK1,BLM
GO:BP	negative regulation of necroptotic process	GO:0060546	0.0249575	1.6028	13	1256	7	17231	CASP8,BIRC3,RIPK1,BIRC2,RBCK1,PELI1,RNF31
GO:BP	nucleobase-containing compound biosynthetic process	GO:0034654	0.0254278	1.59469	3313	1256	300	17231	IRF8,NLRC5,CIITA,IRF1,STAT3,SBNO2,PARP14,ZNFX1,TRIM25,STAT2,IRF9,FST,IRF7,DTX3L,GTF2B,TEAD4,TRIM21,TRIM16,STAT1,TLR4,GCLC,BCL3,CD74,ARHGEF5,CMPK2,EIF2AK2,ATP8B1,NMI,ATF3,ARID5B,SAMHD1,MAFF,SMAD1,NAMPT,DAB2IP,TNFRSF1A,NT5E,SP110,ID1,RIPK1,ADA,UMPS,KLF6,TRIM38,ZFP36,PARP3,BACH1,ACSL5,ARID5A,RTKN2,CDK17,PPARD,PCGF5,INHBA,DAXX,HGF,LRP8,MAPRE3,SPP1,CEBPB,ZGPAT,PML,RNASEL,ZBTB38,TRIM14,TXNIP,IPPK,TBX21…
GO:BP	myeloid cell differentiation	GO:0030099	0.0262369	1.58109	279	1256	41	17231	IRF8,STAT3,SBNO2,CSF1,ADAR,STAT1,CD74,CASP8,RIPK1,ZFP36,INHBA,ZFP36L1,CEBPB,PML,SP3,BATF2,LTBR,UBASH3B,JAK2,ISG15,LRRK1,HIF1A,TRIB1,KLF10,ITGB8,SCIN,DCSTAMP,ABI1,TMOD3,KMT2E,RB1,SMAP1,PTPN2,UFL1,SNX10,SH3PXD2A,IREB2,PTPN11,BATF3,TET2,MED1
GO:BP	regulation of cell migration	GO:0030334	0.0262608	1.58069	669	1256	79	17231	ADAMTS1,STAT3,CSF1,FAM110C,THBS1,CD74,STARD13,RRAS2,DAB2IP,CLDN1,SDC4,ADA,HGF,NEDD9,EPHB2,SEMA7A,SPRED1,PTPRJ,MGAT3,ATP2B4,KLF4,AMOTL1,ANO6,RAP2A,PTK2,ABL1,ITGA6,DUSP10,DOCK8,SEMA3C,SH3RF2,HIF1A,TRIB1,EDN1,ADAM9,IL1R1,SPRY2,ITGB1,LRCH1,SRGAP1,SPAG9,TTBK2,ROCK2,CLIC4,CXCL16,IL12A,MET,GJA1,PIK3C2A,DOCK4,ANXA1,DOCK7,ABHD2,SLK,EGFR,ITGAV,CRK,BMPR2,SEMA4D,MSN,CEMIP,PDPN,APC,WASL,CDH1,KIF2A,BCAR1,HACE1…
GO:BP	DNA replication	GO:0006260	0.0271055	1.56694	187	1256	31	17231	SLFN11,SAMHD1,ZBTB38,E2F8,TOP1,CTC1,BCAR3,POLB,MCIDAS,GINS2,PDS5A,EREG,MCM10,INO80,TIMELESS,EGFR,USP37,DDX21,ATAD5,RRM2B,MCMBP,TICRR,NFIX,WDHD1,ATR,FBH1,RPAIN,DHX9,GEN1,DBF4,BLM
GO:BP	positive regulation of protein modification by small protein conjugation or removal	GO:1903322	0.0279514	1.5536	103	1256	21	17231	NMI,BIRC3,BIRC2,SENP2,DCUN1D3,XIAP,BCL10,DDX3X,INAVA,RIPK2,PELI1,MASTL,PIAS1,LRRK2,HDAC4,UBA2,BRCA1,AMER1,CDC20B,MYCBP2,NDFIP2
GO:BP	negative regulation of cell population proliferation	GO:0008285	0.0282778	1.54855	459	1256	59	17231	IRF1,STAT3,STAT1,THBS1,EIF2AK2,NMI,SMAD1,DAB2IP,ITGA1,SDC4,RIPK1,IFIT3,CD274,PPARD,INHBA,TNS2,CEBPB,PML,PTPRJ,PTGDR2,KLF4,MORC3,PARP10,SAV1,DUSP10,TRIB1,STK3,ITCH,SPRY2,SCIN,ING2,C24H18ORF54,PELI1,IL12A,EREG,IFI35,PEX2,NACC2,RB1,HDAC4,TNFRSF21,BMPR2,LGALS9,TRIM24,ARG2,APC,PTPN2,ZBTB7C,ZBTB49,INTU,TNFAIP3,KAT2B,BMPR1B,PBRM1,FKTN,CNOT7,AIMP1,MED1,PTPRK
GO:BP	signaling	GO:0023052	0.0309119	1.50987	5745	1256	487	17231	NLRC5,IRF1,STAT3,PARP14,CSF1,TRIM25,FAM110C,STAT2,IL15RA,TUBB3,FST,IRF7,SOCS3,IFNAR2,ITGA2,DTX3L,ICOSLG,PARP9,PLCH1,TEAD4,TRIM21,TRIM16,MX1,ADAR,STAT1,TLR4,PNKD,THBS1,BCL3,RNF125,CDKN2AIP,CD74,ARHGEF5,IFIH1,STARD13,ZBP1,DOCK9,IFIT5,EIF2AK2,PDE3B,CISH,NMI,ATF3,ARID5B,RRAS2,SAMHD1,SMAD1,ATAD1,CGAS,ARL6IP5,LOC101905041,NAMPT,TGM2,MCL1,DAB2IP,PTPDC1,TICAM2,CASP8,FAS,TNFRSF1A,ITGA1,OSMR,STARD8,RGS16,A…
GO:BP	positive regulation of hydrolase activity	GO:0051345	0.032066	1.49395	492	1256	62	17231	STAT3,ARHGEF5,STARD13,ARL6IP5,DAB2IP,CASP8,FAS,ITGA1,STARD8,RGS16,ARHGAP28,EGLN3,TNFSF10,PMAIP1,PPP1R15B,SNX18,NEDD9,PML,ARAP2,NMUR2,CFLAR,ITGA6,DOCK8,BCL10,USP6NL,DDX3X,ARHGAP24,RIPK2,BCAR3,GNAQ,ITGB1,SRGAP1,SIPA1L3,ROCK2,IQGAP1,TBC1D9,GSK3B,RTN4R,NOD1,ECT2,PSME1,ASAP1,DOCK4,MYO9A,LRRK2,DOCK7,PSME4,EVI5,SMAP1,RALGAPB,CRK,SEMA4D,RIC8B,BCL2L11,RASA1,ARHGEF12,PLEKHG6,DENND1B,ARHGAP17,ARHGAP9,LGMN,C…
GO:BP	MAPK cascade	GO:0000165	0.0332515	1.47819	545	1256	67	17231	TLR4,THBS1,CD74,ARHGEF5,EIF2AK2,ATF3,SMAD1,ARL6IP5,DAB2IP,FAS,RIPK1,TMEM106A,ZFP36,DUSP16,HGF,ZFP36L1,EPHB2,SEMA7A,SPRED1,PTPRJ,LTBR,RELL1,RAP2A,ABL1,AIDA,DUSP10,SH3RF2,INAVA,MAGI3,TRIB1,EDN1,IGFBP3,STK40,DUSP5,RIPK2,BCAR3,STK3,ITCH,SPRY2,STRADB,MAP2K6,CDON,SPAG9,CYLD,FFAR4,IQGAP1,PJA2,MAP4K5,NOD1,ZFP36L2,LRRK2,NLK,EGFR,SETX,ITGAV,STYX,SORBS3,AKAP13,PTPN2,SPRED3,MAP4K4,PTPN11,FKTN,MAP3K13,BRAP,TA…
GO:BP	intestinal epithelial cell differentiation	GO:0060575	0.0351969	1.4535	18	1256	8	17231	IL6ST,TIGAR,SAV1,HIF1A,KLF5,PRDM1,YAP1,YIPF6
GO:BP	regulation of G1/S transition of mitotic cell cycle	GO:2000045	0.0355759	1.44884	74	1256	17	17231	ADAMTS1,SLFN11,RIPK1,FBXO7,PML,KLF4,DCUN1D3,DDX3X,PSME1,ANXA1,KMT2E,NACC2,INO80,EGFR,RB1,CTDSP1,APC
GO:BP	angiogenesis	GO:0001525	0.0357328	1.44693	351	1256	48	17231	ADAMTS1,STAT3,STAT1,THBS1,STARD13,PDE3B,SMAD1,DAB2IP,HS6ST1,EPHB2,SPRED1,PML,SAT1,C3,E2F8,ATP2B4,KLF4,AMOTL1,PTK2,FOXJ2,ABL1,E2F2,NRP2,GAB1,HIF1A,EDN1,ITGB8,SPRY2,ELK3,ITGB1,KLF5,ESM1,ROCK2,CLIC4,IL12A,PIK3C2A,ANXA1,HK2,ITGAV,RASIP1,VEGFC,BRCA1,PARVA,SP1,MED1,RORA,VEZF1,CHI3L1
GO:BP	positive regulation of transport	GO:0051050	0.0364648	1.43813	536	1256	66	17231	TLR4,ARHGEF5,CD47,ATAD1,SDC4,GOLPH3,ACSL5,SPP1,EPHB2,CEBPB,RNASEL,C3,STX1A,ARL6IP1,AZIN1,CD2AP,ANO6,IL2RB,ABL1,STXBP1,ATP2B1,RAB27A,ANKFY1,SDC1,CTSS,C2,HIF1A,ATP1B1,EDN1,ADAM9,IRS1,ITGB1,CHP1,FFAR4,TMEM30B,GSK3B,PRKCI,ECT2,MYH10,ANXA1,SNX4,MAVS,SCP2,TMEM30A,CD14,CRACR2A,DYNC1H1,MSN,WLS,CEMIP,FMR1,ABCA5,CDH1,TMF1,BAG3,DHX9,PTPN11,AHCYL1,PARD6A,MIB1,C2CD5,VMP1,ABCA3,CPSF6,NEDD4,OSBPL8
GO:BP	positive regulation of tumor necrosis factor superfamily cytokine production	GO:1903557	0.0375046	1.42591	60	1256	15	17231	STAT3,TLR4,THBS1,IFIH1,RIPK1,TMEM106A,OAS2,ARID5A,EPHB2,RIPK2,NOD1,MAVS,CD14,DHX9,PTPN11
GO:BP	negative regulation of cell cycle phase transition	GO:1901988	0.040001	1.39793	164	1256	28	17231	SLFN11,RIPK1,FBXO7,ZFP36L1,PML,KLF4,DCUN1D3,EIF2AK4,ATM,ZFP36L2,NACC2,TIMELESS,RB1,CTDSP1,TICRR,APC,ATR,FEM1B,BRCA1,PTPN11,RAD1,INTS7,ATRIP,GEN1,DOT1L,NDC80,TAOK1,BLM
GO:BP	locomotion	GO:0040011	0.0415765	1.38115	1382	1256	141	17231	ADAMTS1,STAT3,CSF1,FAM110C,TUBB3,ITGA2,THBS1,CD74,ARHGEF5,STARD13,ARID5B,LIMA1,RRAS2,DAB2IP,ITGA1,CLDN1,SDC4,ADA,GOLPH3,RHOBTB3,FBXO7,PPARD,HGF,LRP8,NEDD9,EPHB2,SEMA7A,SPRED1,PML,PTPRJ,TBX21,LGALS8,MGAT3,ATP2B4,DIXDC1,PTGDR2,DCDC2,KLF4,EPS8,AMOTL1,ANO6,RND3,RAP2A,PTK2,ABL1,ITGA6,DUSP10,DOCK8,USP9X,SEMA3C,NRP2,SIX1,SH3RF2,GAB1,HIF1A,TRIB1,EDN1,ARHGAP24,ADAM9,ALCAM,ITGB8,IL1R1,SLC12A2,ZFAND5,SPRY2,…
GO:BP	regulation of defense response to virus	GO:0050688	0.0417396	1.37945	47	1256	13	17231	DTX3L,STAT1,RNF125,CGAS,LOC100139670,HERC5,ITCH,TRAF3IP2,DHX58,NLRX1,MAVS,TRIM44,SEC14L1
GO:BP	cell activation	GO:0001775	0.0452727	1.34416	723	1256	83	17231	IRF8,IRF1,STAT3,SBNO2,TLR4,THBS1,BCL3,CD74,NMI,CD47,CGAS,BOLA-DRA,SDC4,TNFSF13B,ADA,TMEM106A,IL7,PSMB10,FBXO7,PARP3,CD274,PVR,ZFP36L1,EPHB2,CEBPB,SOCS1,TBX21,SP3,BATF2,EXO1,PAG1,LTBR,IL6ST,STXBP3,TNFSF9,UBASH3B,LDLR,ABL1,STXBP1,DUSP10,TBK1,DOCK8,BCL10,ADAM9,RIPK2,ITGB8,NECTIN2,ITCH,KLF5,TRAF3IP2,ATM,PELI1,RUNX2,PJA2,IL12A,DCSTAMP,IFI35,ZFP36L2,PRDM1,MR1,RC3H2,ANXA1,KMT2E,SNX4,CDH17,HECTD1,TNFRSF2…
GO:BP	antigen processing and presentation of peptide antigen via MHC class I	GO:0002474	0.0467678	1.33005	14	1256	7	17231	TAP1,TAPBPL,ERAP2,LOC618733,ERAP1,TAPBP,IDE
GO:BP	negative regulation of programmed necrotic cell death	GO:0062099	0.0467678	1.33005	14	1256	7	17231	CASP8,BIRC3,RIPK1,BIRC2,RBCK1,PELI1,RNF31
GO:BP	JNK cascade	GO:0007254	0.0489317	1.31041	123	1256	23	17231	TLR4,DAB2IP,RIPK1,LTBR,RAP2A,AIDA,DUSP10,SH3RF2,MAGI3,TRIB1,RIPK2,STK3,ITCH,STRADB,SPAG9,CYLD,PJA2,NOD1,EGFR,MAP4K4,FKTN,MAP3K13,TAOK1
GO:BP	regulation of organelle organization	GO:0033043	0.0494176	1.30612	914	1256	100	17231	ARHGEF5,LIMA1,ARHGAP28,TNFSF10,SDC4,GOLPH3,RHOBTB3,FBXO7,PARP3,PMAIP1,ARID5A,CLTC,HGF,MAPRE3,PML,SMG6,ARL6IP1,DIXDC1,CLIP1,DCDC2,RAB33B,EPS8,CD2AP,TIGAR,MIER1,RASSF1,RND3,TWF1,ABL1,RICTOR,SDC1,MTPN,USP6NL,ATXN7,HIF1A,CTC1,EDN1,MCIDAS,CENPE,TNKS,SCIN,TTBK2,ING2,ROCK2,ATM,C8H9ORF72,CYLD,SVIL,IQGAP1,KIF18A,GSK3B,MET,EREG,TRIM36,TMOD3,ECT2,NEK6,NCKAP1,ANXA1,KMT2E,PRKAA2,LRRK2,OGT,ARFGEF1,TMOD2,GPSM2,…
GO:CC	intracellular anatomical structure	GO:0005622	9.20999e-27	26.0357	12239	1235	1024	17622	IRF8,NLRC5,RNF19B,TAP1,CIITA,LOC512486,IRF1,ADAMTS1,LOC511531,STAT3,PARP14,CSF1,ZNFX1,TRIM25,FAM110C,STAT2,TUBB3,IRF9,FST,IRF7,OAS1Y,DTX3L,RNF122,GTF2B,LOC507055,PARP9,PLCH1,TEAD4,LAP3,TRIM21,TRIM16,MX1,ADAR,SLFN11,ITPKC,STAT1,TLR4,CYP24A1,PNKD,ISG20,GCLC,THBS1,UBA7,BCL3,PHLDA1,RNF125,HERC6,ZC3HAV1,CDKN2AIP,CD74,ARHGEF5,IFIH1,STARD13,CMPK2,ZBP1,FLNB,IFIT5,EIF2AK2,GBP4,DRAM1,ATP8B1,NMI,ATF3,ARID5B…
GO:CC	intracellular membrane-bounded organelle	GO:0043231	1.63062e-25	24.7876	9322	1235	836	17622	IRF8,NLRC5,RNF19B,TAP1,CIITA,LOC512486,IRF1,ADAMTS1,LOC511531,STAT3,PARP14,CSF1,ZNFX1,TRIM25,STAT2,IRF9,FST,IRF7,OAS1Y,DTX3L,GTF2B,LOC507055,PARP9,TEAD4,LAP3,TRIM21,TRIM16,MX1,ADAR,SLFN11,ITPKC,STAT1,TLR4,CYP24A1,PNKD,ISG20,THBS1,UBA7,BCL3,PHLDA1,RNF125,HERC6,ZC3HAV1,CDKN2AIP,CD74,ARHGEF5,CMPK2,ZBP1,GBP4,DRAM1,ATP8B1,NMI,ATF3,ARID5B,VCPIP1,SAMHD1,MAFF,SMAD1,CGAS,LOC101905041,NAMPT,TGM2,BOLA-DRA,M…
GO:CC	membrane-bounded organelle	GO:0043227	1.15817e-23	22.9362	9689	1235	854	17622	IRF8,NLRC5,RNF19B,TAP1,CIITA,LOC512486,IRF1,ADAMTS1,LOC511531,STAT3,PARP14,CSF1,ZNFX1,TRIM25,STAT2,IRF9,FST,IRF7,OAS1Y,DTX3L,GTF2B,LOC507055,PARP9,TEAD4,LAP3,TRIM21,TRIM16,MX1,ADAR,SLFN11,ITPKC,STAT1,TLR4,CYP24A1,PNKD,ISG20,THBS1,UBA7,BCL3,PHLDA1,RNF125,HERC6,ZC3HAV1,CDKN2AIP,CD74,ARHGEF5,CMPK2,ZBP1,GBP4,DRAM1,ATP8B1,NMI,ATF3,ARID5B,VCPIP1,SAMHD1,MAFF,SMAD1,CGAS,LOC101905041,NAMPT,TGM2,BOLA-DRA,M…
GO:CC	cytoplasm	GO:0005737	3.45713e-22	21.4613	8891	1235	795	17622	IRF8,NLRC5,RNF19B,TAP1,CIITA,LOC512486,IRF1,ADAMTS1,LOC511531,STAT3,PARP14,CSF1,TRIM25,FAM110C,STAT2,TUBB3,IRF9,FST,IRF7,OAS1Y,DTX3L,RNF122,LOC507055,PARP9,PLCH1,TEAD4,LAP3,TRIM21,TRIM16,MX1,ADAR,SLFN11,ITPKC,STAT1,TLR4,CYP24A1,PNKD,ISG20,GCLC,THBS1,UBA7,BCL3,PHLDA1,RNF125,HERC6,ZC3HAV1,CD74,ARHGEF5,IFIH1,STARD13,CMPK2,ZBP1,FLNB,IFIT5,EIF2AK2,GBP4,DRAM1,ATP8B1,NMI,LIMA1,RTP4,PPA1,VCPIP1,MAFF,SMAD…
GO:CC	nucleus	GO:0005634	1.52367e-21	20.8171	5883	1235	577	17622	IRF8,NLRC5,CIITA,IRF1,STAT3,PARP14,CSF1,ZNFX1,TRIM25,STAT2,IRF9,FST,IRF7,OAS1Y,DTX3L,GTF2B,PARP9,TEAD4,LAP3,TRIM21,TRIM16,MX1,ADAR,SLFN11,ITPKC,STAT1,CYP24A1,ISG20,UBA7,BCL3,PHLDA1,HERC6,ZC3HAV1,CDKN2AIP,CD74,ARHGEF5,CMPK2,ZBP1,ATP8B1,NMI,ATF3,ARID5B,VCPIP1,SAMHD1,MAFF,SMAD1,CGAS,NAMPT,TGM2,MCL1,PTPDC1,NUB1,AIFM2,CASP8,FAS,BIRC3,EGLN3,CDADC1,NT5E,SP110,ID1,USP18,RAB8B,UMPS,KLF6,PLEKHG1,DYRK2,PSMB…
GO:CC	intracellular organelle	GO:0043229	2.48692e-20	19.6043	10637	1235	904	17622	IRF8,NLRC5,RNF19B,TAP1,CIITA,LOC512486,IRF1,ADAMTS1,LOC511531,STAT3,PARP14,CSF1,ZNFX1,TRIM25,STAT2,TUBB3,IRF9,FST,IRF7,OAS1Y,DTX3L,GTF2B,LOC507055,PARP9,TEAD4,LAP3,TRIM21,TRIM16,MX1,ADAR,SLFN11,ITPKC,STAT1,TLR4,CYP24A1,PNKD,ISG20,THBS1,UBA7,BCL3,PHLDA1,RNF125,HERC6,ZC3HAV1,CDKN2AIP,CD74,ARHGEF5,CMPK2,ZBP1,IFIT5,GBP4,DRAM1,ATP8B1,NMI,ATF3,ARID5B,LIMA1,VCPIP1,SAMHD1,MAFF,SMAD1,CGAS,LOC101905041,NAM…
GO:CC	organelle	GO:0043226	3.93473e-19	18.4051	10908	1235	917	17622	IRF8,NLRC5,RNF19B,TAP1,CIITA,LOC512486,IRF1,ADAMTS1,LOC511531,STAT3,PARP14,CSF1,ZNFX1,TRIM25,STAT2,TUBB3,IRF9,FST,IRF7,OAS1Y,DTX3L,GTF2B,LOC507055,PARP9,TEAD4,LAP3,TRIM21,TRIM16,MX1,ADAR,SLFN11,ITPKC,STAT1,TLR4,CYP24A1,PNKD,ISG20,THBS1,UBA7,BCL3,PHLDA1,RNF125,HERC6,ZC3HAV1,CDKN2AIP,CD74,ARHGEF5,CMPK2,ZBP1,IFIT5,GBP4,DRAM1,ATP8B1,NMI,ATF3,ARID5B,LIMA1,VCPIP1,SAMHD1,MAFF,SMAD1,CGAS,LOC101905041,NAM…
GO:CC	nucleoplasm	GO:0005654	3.70259e-18	17.4315	2935	1235	330	17622	IRF8,CIITA,STAT3,CSF1,TRIM25,IRF7,OAS1Y,DTX3L,GTF2B,TEAD4,LAP3,TRIM21,TRIM16,ADAR,SLFN11,STAT1,CYP24A1,ISG20,BCL3,PHLDA1,HERC6,CDKN2AIP,ARHGEF5,CMPK2,ATP8B1,NMI,ATF3,SAMHD1,MAFF,NAMPT,MCL1,PTPDC1,NUB1,CASP8,FAS,BIRC3,NT5E,SP110,ID1,RAB8B,KLF6,PLEKHG1,DYRK2,FBXO7,PARP3,ACSL5,ARID5A,DUSP16,TXNL4B,IL4R,PCGF5,XAF1,VPS54,DAXX,PLEKHA1,NEDD9,EPHB2,SPRED1,CEBPB,PML,LOC781710,ZBTB38,DENND2D,OAS1X,OAT,SOCS…
GO:CC	nuclear lumen	GO:0031981	9.70881e-17	16.0128	3295	1235	355	17622	IRF8,CIITA,STAT3,CSF1,TRIM25,IRF7,OAS1Y,DTX3L,GTF2B,TEAD4,LAP3,TRIM21,TRIM16,ADAR,SLFN11,STAT1,CYP24A1,ISG20,BCL3,PHLDA1,HERC6,CDKN2AIP,ARHGEF5,CMPK2,ATP8B1,NMI,ATF3,SAMHD1,MAFF,NAMPT,MCL1,PTPDC1,NUB1,CASP8,FAS,BIRC3,NT5E,SP110,ID1,RAB8B,KLF6,PLEKHG1,DYRK2,FBXO7,PARP3,ACSL5,ARID5A,DUSP16,TXNL4B,IL4R,PCGF5,XAF1,VPS54,DAXX,PLEKHA1,NEDD9,EPHB2,SPRED1,CEBPB,PML,SDHAF2,LOC781710,ZBTB38,DENND2D,OAS1X,O…
GO:CC	cytosol	GO:0005829	1.02174e-14	13.9907	2893	1235	314	17622	NLRC5,RNF19B,CIITA,STAT3,PARP14,TRIM25,IRF9,IRF7,OAS1Y,DTX3L,PLCH1,LAP3,TRIM21,TRIM16,MX1,SLFN11,STAT1,BCL3,HERC6,ZC3HAV1,ARHGEF5,ZBP1,FLNB,IFIT5,EIF2AK2,ATP8B1,NMI,LIMA1,CGAS,TGM2,MCL1,IFIT2,NUB1,AIFM2,CASP8,FAS,LOC100139670,BIRC3,EGLN3,NT5E,CARHSP1,USP18,RIPK1,ADA,KLF6,DYRK2,GOLPH3,ZFP36,FBXO7,PMAIP1,DUSP16,IFIT3,TXNL4B,PSMB9,VPS54,PLEKHA1,NEDD9,MVP,SPRED1,CASP7,PML,SDHAF2,LOC781710,DENND2D,BCL…
GO:CC	organelle lumen	GO:0043233	3.20562e-14	13.4941	3587	1235	369	17622	IRF8,CIITA,STAT3,CSF1,TRIM25,IRF7,OAS1Y,DTX3L,GTF2B,TEAD4,LAP3,TRIM21,TRIM16,ADAR,SLFN11,STAT1,CYP24A1,ISG20,BCL3,PHLDA1,HERC6,CDKN2AIP,ARHGEF5,CMPK2,ATP8B1,NMI,ATF3,SAMHD1,MAFF,NAMPT,MCL1,PTPDC1,NUB1,CASP8,FAS,BIRC3,NT5E,SP110,ID1,RAB8B,ADA,KLF6,PLEKHG1,DYRK2,SOD2,FBXO7,PARP3,ACSL5,ARID5A,DUSP16,TXNL4B,IL4R,PCGF5,XAF1,VPS54,ERAP2,DAXX,PLEKHA1,NEDD9,EPHB2,SPRED1,CEBPB,PML,SDHAF2,LOC781710,ZBTB38,…
GO:CC	membrane-enclosed lumen	GO:0031974	3.20562e-14	13.4941	3587	1235	369	17622	IRF8,CIITA,STAT3,CSF1,TRIM25,IRF7,OAS1Y,DTX3L,GTF2B,TEAD4,LAP3,TRIM21,TRIM16,ADAR,SLFN11,STAT1,CYP24A1,ISG20,BCL3,PHLDA1,HERC6,CDKN2AIP,ARHGEF5,CMPK2,ATP8B1,NMI,ATF3,SAMHD1,MAFF,NAMPT,MCL1,PTPDC1,NUB1,CASP8,FAS,BIRC3,NT5E,SP110,ID1,RAB8B,ADA,KLF6,PLEKHG1,DYRK2,SOD2,FBXO7,PARP3,ACSL5,ARID5A,DUSP16,TXNL4B,IL4R,PCGF5,XAF1,VPS54,ERAP2,DAXX,PLEKHA1,NEDD9,EPHB2,SPRED1,CEBPB,PML,SDHAF2,LOC781710,ZBTB38,…
GO:CC	intracellular organelle lumen	GO:0070013	3.20562e-14	13.4941	3587	1235	369	17622	IRF8,CIITA,STAT3,CSF1,TRIM25,IRF7,OAS1Y,DTX3L,GTF2B,TEAD4,LAP3,TRIM21,TRIM16,ADAR,SLFN11,STAT1,CYP24A1,ISG20,BCL3,PHLDA1,HERC6,CDKN2AIP,ARHGEF5,CMPK2,ATP8B1,NMI,ATF3,SAMHD1,MAFF,NAMPT,MCL1,PTPDC1,NUB1,CASP8,FAS,BIRC3,NT5E,SP110,ID1,RAB8B,ADA,KLF6,PLEKHG1,DYRK2,SOD2,FBXO7,PARP3,ACSL5,ARID5A,DUSP16,TXNL4B,IL4R,PCGF5,XAF1,VPS54,ERAP2,DAXX,PLEKHA1,NEDD9,EPHB2,SPRED1,CEBPB,PML,SDHAF2,LOC781710,ZBTB38,…
GO:CC	nuclear body	GO:0016604	1.55322e-06	5.80877	625	1235	84	17622	CSF1,TRIM25,GTF2B,TRIM16,ISG20,ATP8B1,NAMPT,FAS,RAB8B,PARP3,DAXX,PML,EXO1,N4BP1,MRPL44,MORC3,FNBP4,CDC40,ABL1,SF3B1,DUSP10,RAPH1,SETBP1,NUFIP2,HIF1A,POLI,KNL1,CDYL,MCIDAS,CDK12,TNKS,UBXN7,PIAS2,WTAP,CCNL1,NRIP1,ECT2,DUSP11,PIAS1,HAUS6,ELF2,BCLAF1,SRSF10,KMT2E,PRKAA2,TOPBP1,INO80,RB1,SETX,ZCCHC8,CALCOCO2,HDAC4,PKN2,NR3C1,SRPK1,HIPK3,RIF1,NUDT21,YARS2,SCAF11,ATR,CDC5L,KIF2A,HACE1,ERBIN,RPAIN,DHX9,S…
GO:CC	endomembrane system	GO:0012505	6.1373e-06	5.21202	2846	1235	271	17622	RNF19B,TAP1,DTX3L,RNF122,MX1,TLR4,THBS1,RNF125,CD74,ATP8B1,SMAD1,TGM2,BOLA-DRA,CHSY1,IFIT2,TICAM2,TNFRSF1A,ATP9A,B4GALT5,ID1,TAPBPL,RAB8B,GOLPH3,PPP1R15B,ACSL5,CLTC,PCGF5,RAB20,VPS54,ERAP2,SPP1,LOC100298356,PML,PGS1,LOC618733,LOC781710,ARFRP1,DRAM2,OSBPL3,GBP5,STX1A,ARL6IP1,HS3ST1,SGMS1,SENP2,TMCC3,SNX16,ERAP1,LTBR,BOLA-DMA,CLIP1,STXBP3,STX11,CMTM6,NUCB1,MX2,RAB33B,NUP107,TRAPPC8,FHDC1,LOC1124415…
GO:CC	MHC protein complex	GO:0042611	4.25036e-05	4.37157	19	1235	10	17622	CD74,BOLA-DRB3,BOLA-DRA,BOLA-DMB,LOC100848815,B2M,BLA-DQB,BOLA-DMA,BOLA-DQA5,BOLA-DQA2
GO:CC	MHC class II protein complex	GO:0042613	0.00017238	3.76351	17	1235	9	17622	CD74,BOLA-DRB3,BOLA-DRA,BOLA-DMB,LOC100848815,BLA-DQB,BOLA-DMA,BOLA-DQA5,BOLA-DQA2
GO:CC	perinuclear region of cytoplasm	GO:0048471	0.000667432	3.17559	378	1235	52	17622	CSF1,MX1,STAT1,TLR4,EIF2AK2,ATP9A,TNFSF13B,KIRREL1,OAS2,INHBA,VPS54,MVP,LOC781710,OSBPL3,GBP5,DCUN1D3,TWF1,ABL1,ATP6V0A2,BCL10,HSPA8,ITGB1,USP33,CLIC4,CYLD,ATP7A,CA4,ARFGEF1,RHPN2,SLK,CCNT2,EGFR,TNKS2,CLIC1,CALCOCO2,PKN2,MSN,SLC30A7,APC,FMR1,CDH1,PDE4B,PLEC,LRPPRC,NDFIP2,LMTK2,NXT2,NEDD4,LGMN,TAOK1,GOLGA1,CHI3L1
GO:CC	microtubule cytoskeleton	GO:0015630	0.00223882	2.64998	1016	1235	108	17622	NLRC5,TAP1,TUBB3,KIF2C,CLTC,IL4R,PCGF5,MAPRE3,NEDD9,CLIP1,SLC16A1,DCDC2,RELL1,MX2,FHDC1,CD2AP,RASSF1,KIF11,PTK2,XIAP,BCL10,DDX3X,ATXN7,CEP170,MAP2,KRT18,LYST,LOC100141266,SPRY2,POLB,GEM,USP33,CENPE,TNKS,SPAG9,TTBK2,ROCK2,ATM,CLIC4,CEP162,CYLD,SVIL,KLHL21,IQGAP1,KIF18A,MASTL,GSK3B,CCDC120,PRKCI,ECT2,HOOK3,CEP350,SBDS,CEP55,HAUS6,NEK6,RMDN3,CKAP2L,HK2,DLGAP5,SNX4,GRAMD2B,EML4,TTI2,GPSM2,RB1,TNKS2,K…
GO:CC	anchoring junction	GO:0070161	0.00228375	2.64135	478	1235	60	17622	ITGA2,LIMA1,ITGA1,CLDN1,TNFSF13B,KIRREL1,PVR,TNS2,PTPRJ,MYO1E,KRT8,AMOTL1,CD2AP,TWF1,PTK2,SAV1,LPP,MAGI3,GAB1,ATP1B1,ARHGAP24,ITGB8,NECTIN2,BCAR3,ITGB1,USP33,SIPA1L3,CLIC4,IQGAP1,PANX1,GJA1,ECT2,MARVELD2,PALLD,TJP1,TJP2,ITGAV,PIK3CA,RASIP1,USP53,PKN2,BMPR2,MSN,PARD3,APC,CDH1,SORBS3,BCAR1,MISP,ERBIN,MAP4K4,SPECC1L,SORBS2,PLEKHA7,PARVA,NECTIN3,PLEC,ACTR3,PARD6A,PTPRK
GO:CC	Golgi apparatus	GO:0005794	0.00330234	2.48118	1025	1235	108	17622	TLR4,RNF125,CD74,ATP8B1,CHSY1,TNFRSF1A,ATP9A,B4GALT5,ID1,GOLPH3,CLTC,PCGF5,RAB20,VPS54,SPP1,LOC100298356,LOC781710,ARFRP1,DRAM2,GBP5,HS3ST1,SGMS1,LTBR,STX11,NUCB1,RAB33B,TRAPPC8,FHDC1,LOC112441507,GPR108,TAPBP,ZDHHC23,LDLR,PARP10,DUSP10,FAM91A1,UGCG,MANEA,DENND5A,KLF5,FAM241A,RAB31,RIC1,USP33,CSGALNACT1,RAB30,NAPEPLD,TNKS,GNPTAB,SIPA1L3,TMEM30B,DENND4C,USP32,ABO,ATP7A,HOOK3,PIK3C2A,DOCK4,CA4,B3GN…
GO:CC	perichromatin fibrils	GO:0005726	0.00719013	2.14326	4	1235	4	17622	NUFIP1,TRIM24,DHX9,CPSF6
GO:CC	PML body	GO:0016605	0.00896868	2.04727	72	1235	16	17622	TRIM16,ISG20,DAXX,PML,N4BP1,MORC3,PIAS2,PIAS1,TOPBP1,RB1,CALCOCO2,HIPK3,ATR,RPAIN,SMC6,BLM
GO:CC	cytoplasmic stress granule	GO:0010494	0.0104922	1.97913	58	1235	14	17622	TRIM25,ZFP36,DDX3X,PUM1,NUFIP2,C8H9ORF72,CAPRIN1,RC3H2,PRKAA2,MBNL1,FMR1,RNF135,KPNB1,TIA1
GO:CC	microtubule	GO:0005874	0.0124967	1.9032	284	1235	39	17622	TUBB3,KIF2C,CLTC,MAPRE3,CLIP1,DCDC2,FHDC1,RASSF1,KIF11,XIAP,BCL10,MAP2,LOC100141266,SPRY2,POLB,CENPE,CEP162,CYLD,SVIL,KLHL21,IQGAP1,KIF18A,HOOK3,HAUS6,RMDN3,GRAMD2B,EML4,KIF23,DYNC1H1,TUBA1C,APC,KIF2A,MISP,LOC112443216,KIF5C,LRPPRC,KIF3B,KATNAL1,NAV3
GO:CC	cell-substrate junction	GO:0030055	0.0129528	1.88764	141	1235	24	17622	ITGA2,LIMA1,ITGA1,TNFSF13B,TNS2,PTK2,LPP,ARHGAP24,ITGB8,BCAR3,ITGB1,USP33,IQGAP1,PALLD,ITGAV,MSN,SORBS3,BCAR1,MISP,ERBIN,MAP4K4,SORBS2,PARVA,PLEC
GO:CC	cytoskeleton	GO:0005856	0.0138443	1.85873	1746	1235	164	17622	NLRC5,TAP1,TUBB3,IFIT5,LIMA1,KIF2C,DYRK2,RHOBTB3,CLTC,IL4R,PCGF5,MAPRE3,NEDD9,MVP,PTPN13,CLIP1,SLC16A1,TRIP10,DCDC2,RELL1,MX2,MYO1E,FHDC1,KRT8,JAK2,CD2AP,RASSF1,RND3,TWF1,KIF11,PTK2,ABL1,XIAP,MTPN,BCL10,DDX3X,LPP,ATXN7,RIPK2,AIF1L,CEP170,MAP2,KRT18,FYB1,LYST,LOC100141266,RIMS3,SPRY2,POLB,GEM,USP33,CENPE,TNKS,SPAG9,PTPN12,SCIN,TTBK2,SIPA1L3,ROCK2,ATM,CLIC4,CEP162,CYLD,SVIL,KLHL21,IQGAP1,KIF18A,PJA…
GO:CC	cytoplasmic ribonucleoprotein granule	GO:0036464	0.0205174	1.68788	182	1235	28	17622	TRIM25,TRIM21,CARHSP1,ZFP36,ZFP36L1,SOCS1,TOP1,KHNYN,DDX3X,PUM1,NUFIP2,POLI,ROCK2,MOV10,C8H9ORF72,IQGAP1,CAPRIN1,RC3H2,PRKAA2,MBNL1,FMR1,DHX9,RNF135,CNOT7,UHMK1,STAU1,KPNB1,TIA1
GO:CC	focal adhesion	GO:0005925	0.0205589	1.687	136	1235	23	17622	ITGA2,LIMA1,ITGA1,TNFSF13B,TNS2,PTK2,LPP,ARHGAP24,ITGB8,BCAR3,ITGB1,USP33,IQGAP1,PALLD,ITGAV,MSN,SORBS3,BCAR1,MISP,MAP4K4,SORBS2,PARVA,PLEC
GO:CC	cytoplasmic vesicle	GO:0031410	0.0207487	1.68301	1240	1235	122	17622	LOC512486,ADAMTS1,LOC511531,DTX3L,LOC507055,TRIM21,THBS1,CD74,GBP4,LOC101905041,BOLA-DRA,DAB2IP,TICAM2,ATP9A,RAB8B,ADA,RHOBTB3,CLTC,SNX18,RAB20,VPS54,SPRED1,LOC781710,GBP5,STX1A,SNX16,BOLA-DMA,CLIP1,STXBP3,CMTM6,MX2,RAB33B,TRAPPC8,MYO1E,AMOTL1,CD46,STEAP3,RFFL,RND3,RAP2A,LDLR,STXBP1,WASHC4,RAB27A,HEATR5B,SEC24B,ANKFY1,ATP6V0A2,TRAK2,CTSS,STARD3,FAM91A1,USP6NL,ITGB8,KNL1,SLC12A2,HSPA8,ITCH,SCFD2,I…
GO:CC	midbody	GO:0030496	0.0230982	1.63642	137	1235	23	17622	LAP3,BCL3,MAPRE3,GEM,CENPE,CLIC4,C8H9ORF72,CYLD,SVIL,IQGAP1,ECT2,CEP55,MYH10,ANLN,MITD1,EML4,PKN2,SH3GLB1,LYRM1,CENPC,UHMK1,KLHL9,KATNAL1
GO:CC	intracellular vesicle	GO:0097708	0.0246751	1.60774	1245	1235	122	17622	LOC512486,ADAMTS1,LOC511531,DTX3L,LOC507055,TRIM21,THBS1,CD74,GBP4,LOC101905041,BOLA-DRA,DAB2IP,TICAM2,ATP9A,RAB8B,ADA,RHOBTB3,CLTC,SNX18,RAB20,VPS54,SPRED1,LOC781710,GBP5,STX1A,SNX16,BOLA-DMA,CLIP1,STXBP3,CMTM6,MX2,RAB33B,TRAPPC8,MYO1E,AMOTL1,CD46,STEAP3,RFFL,RND3,RAP2A,LDLR,STXBP1,WASHC4,RAB27A,HEATR5B,SEC24B,ANKFY1,ATP6V0A2,TRAK2,CTSS,STARD3,FAM91A1,USP6NL,ITGB8,KNL1,SLC12A2,HSPA8,ITCH,SCFD2,I…
GO:CC	vesicle	GO:0031982	0.0302031	1.51995	1349	1235	130	17622	LOC512486,ADAMTS1,LOC511531,DTX3L,LOC507055,TRIM21,THBS1,CD74,GBP4,LOC101905041,BOLA-DRA,DAB2IP,TICAM2,ATP9A,RAB8B,ADA,RHOBTB3,CLTC,SNX18,RAB20,VPS54,SPRED1,LOC781710,GBP5,STX1A,SNX16,BOLA-DMA,CLIP1,STXBP3,CMTM6,MX2,RAB33B,TRAPPC8,MYO1E,AMOTL1,CD2AP,CD46,STEAP3,RFFL,RND3,RAP2A,LDLR,STXBP1,WASHC4,RAB27A,HEATR5B,SEC24B,ANKFY1,ATP6V0A2,TRAK2,CTSS,STARD3,FAM91A1,USP6NL,PROM1,RIPK2,ITGB8,KNL1,SLC12A2,…
GO:CC	death-inducing signaling complex	GO:0031264	0.0339411	1.46927	5	1235	4	17622	CASP8,FAS,RIPK1,CFLAR
GO:CC	supramolecular complex	GO:0099080	0.0345104	1.46205	917	1235	94	17622	TRIM25,TUBB3,TRIM21,KIF2C,CARHSP1,ZFP36,CLTC,MAPRE3,ZFP36L1,SOCS1,TOP1,ATP2B4,CLIP1,KHNYN,DCDC2,NUP107,FHDC1,KRT8,CD2AP,RASSF1,TWF1,KIF11,XIAP,BCL10,DDX3X,PUM1,NUFIP2,AIF1L,POLI,MAP2,KRT18,LOC100141266,SPRY2,POLB,NUP160,CENPE,MTMR12,ROCK2,MOV10,C8H9ORF72,CEP162,CYLD,SVIL,KLHL21,IQGAP1,KIF18A,CAPRIN1,TMOD3,SCO1,HOOK3,PALLD,HAUS6,MYH10,RC3H2,RMDN3,ANXA1,PRKAA2,GRAMD2B,EML4,TMOD2,KIF23,DYNC1H1,MBNL1…
GO:CC	basal part of cell	GO:0045178	0.0345332	1.46176	159	1235	25	17622	ITGA2,SLC22A5,ITGA1,CLDN1,SLC4A7,SLC38A1,SLC16A1,SLC4A4,SLC39A8,LDLR,ATP2B1,ABCC5,ATP1B1,SLC12A2,MET,NOD1,ATP7A,MARVELD2,ANXA1,CDH17,EGFR,MSN,PDPN,ERBIN,IDE
GO:CC	cell leading edge	GO:0031252	0.0478716	1.31992	271	1235	36	17622	TUBB3,IFIT5,LIMA1,PLEKHA1,EPS8,CD2AP,TWF1,ABL1,RAPH1,DOCK8,DDX3X,AIF1L,ITGB1,IQGAP1,KIF18A,CAPRIN1,ABI1,PALLD,SLK,EGFR,ITGAV,PIK3CA,PKN2,PDPN,APC,WASL,CDH1,BCAR1,RASA1,PARVA,ACTR3,TRPM7,C2CD5,ATP6AP2,SLC39A6,PTPRK
KEGG	Influenza A	KEGG:05164	1.03293e-11	10.9859	171	627	45	8108	CIITA,TRIM25,STAT2,IRF9,IRF7,SOCS3,IFNAR2,OAS1Y,MX1,ADAR,STAT1,TLR4,IFIH1,EIF2AK2,BOLA-DRB3,BOLA-DRA,DDX58,BOLA-DMB,CASP8,FAS,TNFRSF1A,TNFSF10,OAS2,LOC100848815,PML,RNASEL,OAS1X,BLA-DQB,IFNAR1,BOLA-DMA,MX2,JAK2,TBK1,BOLA-DQA5,IL12A,NLRX1,BOLA-DQA2,FDPS,MAVS,PIK3CA,IRAK4,CALCOCO2,IRF3,NXT2,IKBKB
KEGG	Herpes simplex virus 1 infection	KEGG:05168	3.30391e-10	9.48097	299	627	60	8108	TAP1,STAT2,IRF9,IRF7,SOCS3,IFNAR2,OAS1Y,STAT1,CD74,IFIH1,EIF2AK2,BOLA-DRB3,CGAS,BOLA-DRA,DDX58,BOLA-DMB,CASP8,FAS,TNFRSF1A,BIRC3,OAS2,LOC100848815,DAXX,B2M,BIRC2,LOC100298356,PML,RNASEL,LOC618733,OAS1X,C3,BLA-DQB,LOC616942,IFNAR1,BOLA-DMA,LOC112441507,JAK2,BOLA,TAPBP,LOC512672,TBK1,NECTIN2,EIF2AK4,LOC100299712,BOLA-DQA5,POU2F1,IL12A,BOLA-NC1,BOLA-DQA2,JSP.1,MAVS,PIK3CA,IRAK4,SRPK1,LOC100847773,IR…
KEGG	NOD-like receptor signaling pathway	KEGG:04621	8.60913e-10	9.06504	171	627	42	8108	LOC512486,LOC511531,STAT2,IRF9,IRF7,IFNAR2,OAS1Y,LOC507055,STAT1,TLR4,IFI16,NAMPT,CASP8,BIRC3,RIPK1,GABARAPL1,OAS2,BIRC2,RNASEL,LOC781710,OAS1X,TXNIP,GBP5,CASP4,IFNAR1,RBCK1,TBK1,XIAP,RIPK2,RNF31,PANX1,NOD1,GSDMD,NLRX1,MAVS,IRAK4,PKN2,ERBIN,IRF3,TNFAIP3,TRPM7,IKBKB
KEGG	Epstein-Barr virus infection	KEGG:05169	9.15798e-10	9.0382	214	627	48	8108	TAP1,STAT3,STAT2,IRF9,IRF7,IFNAR2,OAS1Y,STAT1,EIF2AK2,BOLA-DRB3,BOLA-DRA,DDX58,BOLA-DMB,CASP8,FAS,RIPK1,OAS2,LOC100848815,B2M,LOC618733,OAS1X,BLA-DQB,LOC616942,IFNAR1,BOLA-DMA,RBPJ,ISG15,BOLA,TAPBP,LOC512672,E2F2,TBK1,HDAC1,MAP2K6,BOLA-DQA5,BOLA-NC1,BOLA-DQA2,JSP.1,RB1,MAVS,PIK3CA,IRAK4,BCL2L11,IRF3,MYC,TNFAIP3,NEDD4,IKBKB
KEGG	Antigen processing and presentation	KEGG:04612	6.67958e-09	8.17525	78	627	26	8108	TAP1,CIITA,CD74,BOLA-DRB3,BOLA-DRA,BOLA-DMB,LOC100848815,PSME2,B2M,LOC618733,BLA-DQB,RFX5,LOC616942,BOLA-DMA,BOLA,TAPBP,LOC512672,CTSS,HSPA8,BOLA-DQA5,BOLA-NC1,PSME1,BOLA-DQA2,JSP.1,CANX,LGMN
KEGG	Hepatitis C	KEGG:05160	1.15494e-08	7.93744	156	627	38	8108	STAT3,STAT2,IRF9,IRF7,SOCS3,IFNAR2,OAS1Y,MX1,STAT1,EIF2AK2,DDX58,CASP8,FAS,TNFRSF1A,LOC100139670,CLDN1,RIPK1,OAS2,RNASEL,OAS1X,IFNAR1,MX2,LDLR,CFLAR,E2F2,TBK1,EIF2AK4,YWHAG,GSK3B,PIAS1,NRAS,EGFR,RB1,MAVS,PIK3CA,IRF3,MYC,IKBKB
KEGG	Toxoplasmosis	KEGG:05145	3.5456e-07	6.45031	111	627	29	8108	CIITA,STAT3,STAT1,TLR4,BOLA-DRB3,BOLA-DRA,BOLA-DMB,CASP8,TNFRSF1A,BIRC3,LOC100848815,BIRC2,SOCS1,BLA-DQB,BOLA-DMA,JAK2,LDLR,ITGA6,XIAP,HSPA8,ITGB1,MAP2K6,BOLA-DQA5,IL10RB,IL12A,BOLA-DQA2,IRAK4,IKBKB,LAMA4
KEGG	Measles	KEGG:05162	7.31774e-07	6.13562	142	627	33	8108	STAT3,STAT2,IRF9,IRF7,IFNAR2,OAS1Y,MX1,ADAR,STAT1,TLR4,IFIH1,EIF2AK2,DDX58,CASP8,FAS,OAS2,OAS1X,IFNAR1,MX2,CD46,IL2RB,TBK1,EIF2AK4,HSPA8,IL12A,GSK3B,MAVS,PIK3CA,IRAK4,MSN,IRF3,TNFAIP3,IKBKB
KEGG	Phagosome	KEGG:04145	5.21354e-05	4.28287	160	627	32	8108	TAP1,TUBB3,ITGA2,TLR4,THBS1,BOLA-DRB3,BOLA-DRA,BOLA-DMB,LOC100848815,LOC618733,C3,BLA-DQB,FCGR1A,LOC616942,BOLA-DMA,BOLA,LOC512672,ATP6V0A2,CTSS,LOC100141266,ITGB1,BOLA-DQA5,BOLA-NC1,BOLA-DQA2,JSP.1,ITGAV,CD14,DYNC1H1,TUBA1C,LOC112443216,ATP6V1C1,CANX
KEGG	Human cytomegalovirus infection	KEGG:05163	0.000160511	3.79449	226	627	39	8108	TAP1,STAT3,CGAS,CASP8,FAS,TNFRSF1A,RIPK1,B2M,LOC618733,LOC616942,BOLA,TAPBP,PTK2,LOC512672,E2F2,TBK1,IL1R1,GNAQ,MAP2K6,IL10RB,ROCK2,GNB4,GSK3B,BOLA-NC1,NRAS,JSP.1,EGFR,RB1,ITGAV,PIK3CA,CRK,GNG12,AKAP13,BCAR1,ARHGEF12,IRF3,MYC,SP1,IKBKB
KEGG	Allograft rejection	KEGG:05330	0.00037253	3.42884	50	627	15	8108	BOLA-DRB3,BOLA-DRA,BOLA-DMB,FAS,LOC100848815,BLA-DQB,LOC616942,BOLA-DMA,BOLA,LOC512672,BOLA-DQA5,IL12A,BOLA-NC1,BOLA-DQA2,JSP.1
KEGG	Cell adhesion molecules	KEGG:04514	0.0004911	3.30883	152	627	29	8108	ICOSLG,LOC616254,BOLA-DRB3,BOLA-DRA,BOLA-DMB,CLDN1,SDC4,CD274,LOC100848815,PVR,BLA-DQB,LOC616942,BOLA-DMA,BOLA,LOC512672,SDC1,ITGA6,ALCAM,ITGB8,NECTIN2,LOC100140873,ITGB1,BOLA-DQA5,BOLA-NC1,BOLA-DQA2,JSP.1,ITGAV,CDH1,NECTIN3
KEGG	Human T-cell leukemia virus 1 infection	KEGG:05166	0.000626649	3.20298	221	627	37	8108	IL15RA,BOLA-DRB3,BOLA-DRA,BOLA-DMB,TNFRSF1A,ZFP36,LOC100848815,B2M,BLA-DQB,ETS2,LOC616942,LTBR,BOLA-DMA,BOLA,IL2RB,LOC512672,E2F2,XIAP,IL1R1,POLB,BOLA-DQA5,ATM,BOLA-NC1,NRAS,BOLA-DQA2,JSP.1,FDPS,RB1,EGR2,PIK3CA,ATR,ELK4,MYC,KAT2B,ANAPC10,CANX,IKBKB
KEGG	Human papillomavirus infection	KEGG:05165	0.000895321	3.04802	324	627	48	8108	IRF1,STAT2,IRF9,IFNAR2,ITGA2,MX1,STAT1,THBS1,EIF2AK2,CASP8,FAS,TNFRSF1A,ITGA1,SPP1,LOC616942,IFNAR1,MX2,RBPJ,ISG15,BOLA,PTK2,LOC512672,ATP6V0A2,ITGA6,TBK1,TNC,ITGB8,HDAC1,ITGB1,ATM,GSK3B,PRKCI,BOLA-NC1,NRAS,JSP.1,EGFR,RB1,ITGAV,PIK3CA,PARD3,APC,ATR,IRF3,ATP6V1C1,PARD6A,PPP2R3C,IKBKB,LAMA4
KEGG	Kaposi sarcoma-associated herpesvirus infection	KEGG:05167	0.000962506	3.0166	199	627	34	8108	STAT3,STAT2,IRF9,IRF7,IFNAR2,STAT1,EIF2AK2,CASP8,FAS,TNFRSF1A,GABARAPL1,ZFP36,C3,LOC616942,IL6ST,IFNAR1,JAK2,BOLA,LOC512672,E2F2,TBK1,HIF1A,MAP2K6,GNB4,GSK3B,BOLA-NC1,NRAS,JSP.1,RB1,PIK3CA,GNG12,IRF3,MYC,IKBKB
KEGG	Type I diabetes mellitus	KEGG:04940	0.00107016	2.97055	54	627	15	8108	BOLA-DRB3,BOLA-DRA,BOLA-DMB,FAS,LOC100848815,BLA-DQB,LOC616942,BOLA-DMA,BOLA,LOC512672,BOLA-DQA5,IL12A,BOLA-NC1,BOLA-DQA2,JSP.1
KEGG	Viral myocarditis	KEGG:05416	0.00159689	2.79672	69	627	17	8108	BOLA-DRB3,BOLA-DRA,BOLA-DMB,CASP8,LOC100848815,BLA-DQB,LOC616942,BOLA-DMA,BOLA,ABL1,LOC512672,CD55,BOLA-DQA5,BOLA-NC1,BOLA-DQA2,JSP.1,EIF4G2
KEGG	RIG-I-like receptor signaling pathway	KEGG:04622	0.00195671	2.70847	77	627	18	8108	TRIM25,IRF7,RNF125,IFIH1,DDX58,CASP8,RIPK1,ISG15,TBK1,DDX3X,CYLD,DHX58,IL12A,NLRX1,MAVS,IRF3,TBKBP1,IKBKB
KEGG	Apoptosis	KEGG:04210	0.00253336	2.5963	140	627	26	8108	MCL1,DAB2IP,CASP8,FAS,TNFRSF1A,BIRC3,TNFSF10,RIPK1,PARP3,PMAIP1,DAXX,BIRC2,CASP7,PTPN13,CFLAR,XIAP,CTSS,LOC100141266,ATM,NRAS,PIK3CA,BCL2A1,TUBA1C,BCL2L11,LOC112443216,IKBKB
KEGG	NF-kappa B signaling pathway	KEGG:04064	0.00582091	2.23501	106	627	21	8108	TRIM25,TLR4,TICAM2,DDX58,TNFRSF1A,BIRC3,TNFSF13B,RIPK1,BIRC2,LTBR,CFLAR,XIAP,BCL10,IL1R1,ATM,CYLD,IRAK4,CD14,BCL2A1,TNFAIP3,IKBKB
KEGG	Human immunodeficiency virus 1 infection	KEGG:05170	0.00624034	2.20479	217	627	34	8108	TAP1,TLR4,SAMHD1,CGAS,CASP8,FAS,TNFRSF1A,RIPK1,B2M,LOC100298356,LOC618733,LOC616942,LOC112441507,BOLA,TAPBP,PTK2,LOC512672,TBK1,GNAQ,MAP2K6,LOC616948,ATM,GNB4,BOLA-NC1,NRAS,JSP.1,PIK3CA,IRAK4,CRK,GNG12,ATR,IRF3,LOC516599,IKBKB
KEGG	Inflammatory bowel disease	KEGG:05321	0.00637839	2.19529	69	627	16	8108	STAT3,STAT1,TLR4,BOLA-DRB3,BOLA-DRA,BOLA-DMB,LOC100848815,IL4R,TBX21,BLA-DQB,BOLA-DMA,BOLA-DQA5,IL12A,BOLA-DQA2,IL18RAP,RORA
KEGG	Graft-versus-host disease	KEGG:05332	0.00771417	2.11271	56	627	14	8108	BOLA-DRB3,BOLA-DRA,BOLA-DMB,FAS,LOC100848815,BLA-DQB,LOC616942,BOLA-DMA,BOLA,LOC512672,BOLA-DQA5,BOLA-NC1,BOLA-DQA2,JSP.1
KEGG	Autoimmune thyroid disease	KEGG:05320	0.0116635	1.93317	58	627	14	8108	BOLA-DRB3,BOLA-DRA,BOLA-DMB,FAS,LOC100848815,BLA-DQB,LOC616942,BOLA-DMA,BOLA,LOC512672,BOLA-DQA5,BOLA-NC1,BOLA-DQA2,JSP.1
KEGG	Pertussis	KEGG:05133	0.0155827	1.80736	74	627	16	8108	IRF8,IRF1,TLR4,TICAM2,CASP7,C3,C2,ITGB1,LOC107131209,IL12A,NOD1,C1S,IRAK4,CD14,LOC781663,IRF3
KEGG	JAK-STAT signaling pathway	KEGG:04630	0.0160288	1.7951	173	627	28	8108	STAT3,STAT2,IL15RA,IRF9,SOCS3,IFNAR2,STAT1,CISH,MCL1,IL7,IL4R,SOCS1,IL6ST,IFNAR1,JAK2,IL2RB,IL10RB,PIAS2,IL12A,PIAS1,EGFR,PIK3CA,PTPN2,IL13RA1,MYC,STAM2,PTPN11,SOCS2
KEGG	Leishmaniasis	KEGG:05140	0.0184192	1.73473	75	627	16	8108	STAT1,TLR4,BOLA-DRB3,BOLA-DRA,BOLA-DMB,LOC100848815,C3,BLA-DQB,FCGR1A,BOLA-DMA,JAK2,ITGB1,BOLA-DQA5,IL12A,BOLA-DQA2,IRAK4
KEGG	Coronavirus disease - COVID-19	KEGG:05171	0.0190358	1.72043	248	627	36	8108	STAT3,STAT2,IRF9,IFNAR2,OAS1Y,MX1,ADAR,STAT1,TLR4,IFIH1,EIF2AK2,CGAS,DDX58,TNFRSF1A,OAS2,OAS1X,C3,IL6ST,IFNAR1,MX2,ISG15,TBK1,C2,MMP1,LOC107131209,MASP1,IL12A,EGFR,MAVS,C1S,PIK3CA,IRAK4,LOC781663,LOC112441463,IRF3,IKBKB
KEGG	Salmonella infection	KEGG:05132	0.022408	1.6496	250	627	36	8108	TUBB3,TLR4,FLNB,CASP8,TNFRSF1A,BIRC3,TNFSF10,RIPK1,SNX18,BIRC2,CASP7,CASP4,RIPK2,LOC100141266,MAP2K6,ROCK2,NOD1,ABI1,GSDMD,PIK3C2A,EXOC5,NCKAP1,ACTR2,PIK3CA,IRAK4,FYCO1,CD14,DYNC1H1,TUBA1C,WASL,KPNA4,MYC,LOC112443216,KIF5C,ACTR3,IKBKB
KEGG	Necroptosis	KEGG:04217	0.0226305	1.6453	150	627	25	8108	STAT3,STAT2,IRF9,IFNAR2,STAT1,TLR4,ZBP1,EIF2AK2,TICAM2,CASP8,FAS,TNFRSF1A,BIRC3,TNFSF10,RIPK1,BIRC2,IFNAR1,JAK2,CFLAR,RBCK1,XIAP,CYLD,RNF31,TNFAIP3,TRPM7
KEGG	Endocytosis	KEGG:04144	0.023203	1.63446	241	627	35	8108	SMAP2,CLTC,PML,ARAP2,LOC616942,BOLA,IL2RB,LDLR,LOC512672,WASHC4,HSPA8,ITCH,RAB31,VPS36,PRKCI,BOLA-NC1,ASAP1,SNX4,JSP.1,ARFGEF1,ACTR2,EGFR,SMAP1,ARF3,NEDD4L,SH3GLB1,PARD3,WASL,STAM2,KIF5C,ACTR3,PARD6A,SMURF2,SMURF1,NEDD4
KEGG	Hematopoietic cell lineage	KEGG:04640	0.0269305	1.56976	101	627	19	8108	CSF1,ITGA2,BOLA-DRB3,BOLA-DRA,BOLA-DMB,ITGA1,IL7,LOC100848815,IL4R,BLA-DQB,FCGR1A,BOLA-DMA,ITGA6,CD55,IL1R1,BOLA-DQA5,BOLA-DQA2,CD14,FLT3LG
KEGG	Pathways in cancer	KEGG:05200	0.0297715	1.5262	515	627	62	8108	STAT3,STAT2,IL15RA,IFNAR2,ITGA2,STAT1,CASP8,FAS,BIRC3,EGLN3,IL7,PMAIP1,PPARD,IL4R,HGF,BIRC2,CASP7,PML,IL6ST,IFNAR1,RUNX1T1,JAK2,RASSF1,IL2RB,PTK2,ABL1,E2F2,ITGA6,XIAP,HIF1A,EDN1,MMP1,HDAC1,GNAQ,ITGB1,ROCK2,GNB4,IL12A,GSK3B,MET,NRAS,EML4,EGFR,RB1,ITGAV,PIK3CA,CRK,GNG12,APC,CDH1,LOC112441463,BCL2L11,IL13RA1,ARHGEF12,FLT3LG,MYC,VEGFC,SP1,EGLN2,CCDC6,IKBKB,LAMA4
KEGG	Th17 cell differentiation	KEGG:04659	0.0299754	1.52323	110	627	20	8108	STAT3,STAT1,BOLA-DRB3,BOLA-DRA,BOLA-DMB,LOC100848815,IL4R,TBX21,BLA-DQB,IL6ST,BOLA-DMA,JAK2,IL2RB,HIF1A,IL1R1,BOLA-DQA5,BOLA-DQA2,LOC618409,RORA,IKBKB
KEGG	TNF signaling pathway	KEGG:04668	0.0325469	1.48749	119	627	21	8108	IRF1,CSF1,SOCS3,BCL3,DAB2IP,CASP8,FAS,TNFRSF1A,BIRC3,RIPK1,BIRC2,CASP7,CEBPB,CFLAR,EDN1,ITCH,MAP2K6,PIK3CA,TNFAIP3,VEGFC,IKBKB
KEGG	Ubiquitin mediated proteolysis	KEGG:04120	0.0336651	1.47282	145	627	24	8108	SOCS3,UBA7,BIRC3,UBE2L6,BIRC2,PML,SOCS1,XIAP,ITCH,PIAS2,PIAS1,UBE2W,NEDD4L,UBA6,UBA2,BRCA1,SIAH1,UBE4A,ANAPC10,KLHL9,SMURF2,SMURF1,UBA3,NEDD4
KEGG	Tuberculosis	KEGG:05152	0.0384529	1.41507	182	627	28	8108	CIITA,STAT1,TLR4,CD74,BOLA-DRB3,BOLA-DRA,BOLA-DMB,CASP8,TNFRSF1A,LOC100848815,CEBPB,C3,BLA-DQB,FCGR1A,RFX5,BOLA-DMA,JAK2,ATP6V0A2,CTSS,BCL10,RIPK2,BOLA-DQA5,IL10RB,IL12A,BOLA-DQA2,IRAK4,CD14,ARHGEF12
REAC	Interferon Signaling	REAC:R-BTA-913531	1.13392e-07	6.94542	48	404	20	4722	STAT2,IRF9,SOCS3,STAT1,EIF2AK2,DDX58,USP18,UBE2L6,HERC5,RNASEL,SOCS1,IFNAR1,MX2,JAK2,ISG15,ABCE1,PIAS1,PTPN2,IRF3,PTPN11
REAC	Negative regulators of DDX58/IFIH1 signaling	REAC:R-BTA-936440	5.43739e-05	4.26461	8	404	7	4722	DDX58,UBE2L6,HERC5,ISG15,NLRX1,MAVS,IRF3
REAC	DDX58/IFIH1-mediated induction of interferon-alpha/beta	REAC:R-BTA-168928	8.07801e-05	4.0927	11	404	8	4722	IRF7,DDX58,UBE2L6,HERC5,ISG15,NLRX1,MAVS,IRF3
REAC	Cytokine Signaling in Immune system	REAC:R-BTA-1280215	0.000269865	3.56885	214	404	40	4722	CSF1,STAT2,IL15RA,IRF9,SOCS3,STAT1,EIF2AK2,DDX58,BIRC3,TNFSF13B,USP18,UBE2L6,HERC5,RNASEL,PTPRJ,SOCS1,LTBR,IL6ST,IFNAR1,MX2,JAK2,ISG15,IL2RB,TBK1,TNFRSF6B,IL1R1,ABCE1,PIAS1,NRAS,PIK3CA,IRAK4,CRK,TNFRSF11B,PTPN2,IL13RA1,FLT3LG,IRF3,PTPN11,YES1,IKBKB
REAC	Antigen Presentation: Folding, assembly and peptide loading of class I MHC	REAC:R-BTA-983170	0.000365198	3.43747	20	404	10	4722	TAP1,B2M,LOC618733,LOC616942,ERAP1,BOLA,TAPBP,BOLA-NC1,JSP.1,SAR1B
REAC	Adaptive Immune System	REAC:R-BTA-1280218	0.000437327	3.35919	317	404	52	4722	RNF19B,TAP1,SOCS3,ICOSLG,TRIM21,HERC6,CD74,BOLA-DRB3,BOLA-DRA,BOLA-DMB,FBXO7,UBE2L6,CD274,LOC100848815,HERC5,PVR,B2M,LOC509283,LOC618733,SOCS1,BLA-DQB,FCGR1A,FBXL14,LOC616942,ERAP1,BOLA-DMA,RNF114,BOLA,TAPBP,RBCK1,CTSS,UBR1,BCL10,RIPK2,LNPEP,BOLA-DQA5,TRIM36,BOLA-NC1,NRAS,BOLA-DQA2,JSP.1,UBE2W,PIK3CA,NEDD4L,UFL1,FBXL18,RNF217,PTPN11,LMO7,SMURF1,YES1,SAR1B
REAC	Antiviral mechanism by IFN-stimulated genes	REAC:R-BTA-1169410	0.000533934	3.27251	25	404	11	4722	STAT1,EIF2AK2,DDX58,USP18,UBE2L6,HERC5,RNASEL,MX2,ISG15,ABCE1,IRF3
REAC	Death Receptor Signalling	REAC:R-BTA-73887	0.000641308	3.19293	35	404	13	4722	CASP8,FAS,BIRC3,TNFSF10,RIPK1,TNFRSF10D,CFLAR,RBCK1,XIAP,RNF31,SPPL2A,BCL2L11,TNFAIP3
REAC	Regulation of necroptotic cell death	REAC:R-BTA-5675482	0.000644481	3.19079	21	404	10	4722	CASP8,FAS,BIRC3,TNFSF10,RIPK1,TNFRSF10D,SDCBP,CFLAR,XIAP,OGT
REAC	Regulated Necrosis	REAC:R-BTA-5218859	0.00109226	2.96167	22	404	10	4722	CASP8,FAS,BIRC3,TNFSF10,RIPK1,TNFRSF10D,SDCBP,CFLAR,XIAP,OGT
REAC	RIPK1-mediated regulated necrosis	REAC:R-BTA-5213460	0.00109226	2.96167	22	404	10	4722	CASP8,FAS,BIRC3,TNFSF10,RIPK1,TNFRSF10D,SDCBP,CFLAR,XIAP,OGT
REAC	Class I MHC mediated antigen processing & presentation	REAC:R-BTA-983169	0.00155439	2.80844	173	404	33	4722	RNF19B,TAP1,SOCS3,TRIM21,HERC6,FBXO7,UBE2L6,HERC5,B2M,LOC509283,LOC618733,SOCS1,FCGR1A,FBXL14,LOC616942,ERAP1,RNF114,BOLA,TAPBP,RBCK1,UBR1,LNPEP,TRIM36,BOLA-NC1,JSP.1,UBE2W,NEDD4L,UFL1,FBXL18,RNF217,LMO7,SMURF1,SAR1B
REAC	Immune System	REAC:R-BTA-168256	0.00201841	2.69499	928	404	114	4722	RNF19B,TAP1,CSF1,STAT2,IL15RA,IRF9,IRF7,SOCS3,ICOSLG,TRIM21,STAT1,HERC6,CD74,EIF2AK2,BOLA-DRB3,BOLA-DRA,TICAM2,DDX58,BOLA-DMB,PNP,BIRC3,TNFSF13B,USP18,FBXO7,UBE2L6,CD274,LOC100848815,HERC5,PVR,B2M,LOC509283,RNASEL,LOC618733,PTPRJ,SOCS1,BLA-DQB,FCGR1A,FBXL14,LOC616942,ERAP1,LTBR,IL6ST,IFNAR1,BOLA-DMA,CMTM6,MX2,RNF114,JAK2,ISG15,CD46,BOLA,SDCBP,ANO6,IL2RB,TAPBP,GLIPR1,RAB27A,ATP6V0A2,RBCK1,TBK1,CTS…
REAC	Interferon alpha/beta signaling	REAC:R-BTA-909733	0.00219369	2.65883	19	404	9	4722	STAT2,IRF9,SOCS3,STAT1,RNASEL,SOCS1,IFNAR1,ABCE1,PTPN11
REAC	ER-Phagosome pathway	REAC:R-BTA-1236974	0.00231253	2.63591	15	404	8	4722	TAP1,B2M,LOC618733,LOC616942,BOLA,TAPBP,BOLA-NC1,JSP.1
REAC	Antigen processing-Cross presentation	REAC:R-BTA-1236975	0.00283146	2.54799	24	404	10	4722	TAP1,B2M,LOC618733,FCGR1A,LOC616942,BOLA,TAPBP,LNPEP,BOLA-NC1,JSP.1
REAC	TNF signaling	REAC:R-BTA-75893	0.00368972	2.43301	20	404	9	4722	CASP8,BIRC3,RIPK1,CFLAR,RBCK1,XIAP,RNF31,SPPL2A,TNFAIP3
REAC	Regulation of IFNG signaling	REAC:R-BTA-877312	0.00583209	2.23418	9	404	6	4722	SOCS3,STAT1,SOCS1,JAK2,PIAS1,PTPN2
REAC	ISG15 antiviral mechanism	REAC:R-BTA-1169408	0.00597366	2.22376	21	404	9	4722	STAT1,EIF2AK2,DDX58,USP18,UBE2L6,HERC5,MX2,ISG15,IRF3
REAC	MHC class II antigen presentation	REAC:R-BTA-2132295	0.00631574	2.19958	31	404	11	4722	CD74,BOLA-DRB3,BOLA-DRA,BOLA-DMB,LOC100848815,BLA-DQB,BOLA-DMA,CTSS,BOLA-DQA5,BOLA-DQA2,SAR1B
REAC	Programmed Cell Death	REAC:R-BTA-5357801	0.00776922	2.10962	61	404	16	4722	CASP8,FAS,BIRC3,TNFSF10,RIPK1,PMAIP1,TNFRSF10D,CASP7,SDCBP,PTK2,CFLAR,XIAP,OGT,BCL2L11,PLEC,KPNB1
REAC	Endosomal/Vacuolar pathway	REAC:R-BTA-1236977	0.0135302	1.8687	10	404	6	4722	B2M,LOC616942,BOLA,LNPEP,BOLA-NC1,JSP.1
REAC	Regulation by c-FLIP	REAC:R-BTA-3371378	0.0276259	1.55868	11	404	6	4722	CASP8,FAS,TNFSF10,RIPK1,TNFRSF10D,CFLAR
REAC	Dimerization of procaspase-8	REAC:R-BTA-69416	0.0276259	1.55868	11	404	6	4722	CASP8,FAS,TNFSF10,RIPK1,TNFRSF10D,CFLAR
REAC	Caspase activation via extrinsic apoptotic signalling pathway	REAC:R-BTA-5357769	0.0276259	1.55868	11	404	6	4722	CASP8,FAS,TNFSF10,RIPK1,TNFRSF10D,CFLAR
REAC	Caspase activation via Death Receptors in the presence of ligand	REAC:R-BTA-140534	0.0276259	1.55868	11	404	6	4722	CASP8,FAS,TNFSF10,RIPK1,TNFRSF10D,CFLAR
REAC	CASP8 activity is inhibited	REAC:R-BTA-5218900	0.0276259	1.55868	11	404	6	4722	CASP8,FAS,TNFSF10,RIPK1,TNFRSF10D,CFLAR
REAC	Regulation of TNFR1 signaling	REAC:R-BTA-5357905	0.042289	1.37377	16	404	7	4722	CASP8,BIRC3,RIPK1,CFLAR,XIAP,SPPL2A,TNFAIP3
WP	Type II interferon signaling (IFNG)	WP:WP1017	5.10358e-07	6.29213	32	380	16	3912	IRF8,TAP1,IRF1,LOC511531,STAT2,SOCS3,OAS1Y,STAT1,EIF2AK2,IFIT2,PSMB9,SOCS1,JAK2,ISG15,LOC512672,PTPN11
WP	Apoptosis Modulation and Signaling	WP:WP3148	0.00329651	2.48195	73	380	19	3912	AIFM2,CASP8,FAS,TNFRSF1A,BIRC3,TNFSF10,RIPK1,TNFRSF10D,DAXX,BIRC2,CASP4,CFLAR,TNFRSF6B,IL1R1,TNFRSF11B,BCL2A1,BAG3,BCL2L11,IKBKB
WP	Regulation of toll-like receptor signaling pathway	WP:WP3132	0.00673701	2.17153	116	380	25	3912	IRF7,IFNAR2,STAT1,TLR4,CISH,TICAM2,CASP8,RIPK1,TIFA,SPP1,SOCS1,IFNAR1,RBCK1,TBK1,MAP2K6,PELI1,CYLD,RNF31,IL12A,PIK3CA,IRAK4,CD14,IRF3,TNFAIP3,IKBKB
WP	Signaling of Hepatocyte Growth Factor Receptor	WP:WP1046	0.00696869	2.15685	31	380	11	3912	STAT3,ITGA1,HGF,PTK2,GAB1,ITGB1,MET,PIK3CA,CRK,RASA1,PTPN11
WP	EGF/EGFR Signaling Pathway	WP:WP978	0.0135654	1.86757	135	380	27	3912	STAT3,STAT1,JAK2,EPS8,PLSCR2,PTK2,ABL1,STXBP1,RICTOR,USP6NL,GAB1,ITCH,SPRY2,PTPN12,IQGAP1,GJA1,ABI1,ASAP1,EGFR,CRK,RASA1,ELK4,PTPN11,RPS6KA3,SP1,ERRFI1,NEDD4
WP	Regulation of Microtubule Cytoskeleton	WP:WP3177	0.0239939	1.6199	35	380	11	3912	STAT3,KIF2C,SPRED1,CLIP1,ABL1,GNAQ,F2RL2,PIK3CA,APC,PARD6A,TAOK1
WP	Apoptosis	WP:WP1018	0.0300223	1.52256	72	380	17	3912	IRF1,IRF7,CASP8,FAS,TNFRSF1A,BIRC3,TNFSF10,RIPK1,BIRC2,CASP4,CFLAR,TNFRSF21,SCAF11,BCL2L11,IRF3,MYC,IKBKB
WP	IL-6 signaling pathway	WP:WP976	0.0315946	1.50039	36	380	11	3912	IRF1,STAT3,SOCS3,STAT1,IL6ST,JAK2,GAB1,HDAC1,PRDM1,NLK,PTPN11
WP	Interleukin-11 Signaling Pathway	WP:WP3159	0.0411166	1.38598	37	380	11	3912	STAT3,SOCS3,ITGA2,STAT1,IL6ST,JAK2,RUNX2,PIAS1,PTPN11,YES1,IKBKB
WP	TGF-beta Signaling Pathway	WP:WP1045	0.0475041	1.32327	109	380	22	3912	ITGA2,THBS1,ATF3,NEDD9,PML,PTK2,TNC,KLF10,NUP214,HDAC1,ITCH,ITGB1,MAP2K6,PIAS2,RUNX2,MET,PIAS1,NEDD4L,MYC,SP1,PARD6A,SMURF2
CORUM	PA28 complex	CORUM:31	0.0254543	1.59424	2	9	2	177	PSME2,PSME1
HP	Abnormality of the lymph nodes	HP:0002733	0.000718842	3.14337	194	382	38	4527	IRF8,STAT3,TLR4,CASP8,FAS,TNFRSF1A,PNP,BIRC3,SP110,RIPK1,ADA,PSMB9,DAXX,SPP1,PML,PSMB8,ERAP1,STX11,BCOR,ISG15,IL2RB,LOC512672,RAB27A,RBCK1,XIAP,BCL10,ASXL1,LYST,EIF2AK4,LOC107131209,ATM,IL12A,PALLD,NRAS,SNX10,MYC,BRCA1,TET2
HP	Abnormality of skin physiology	HP:0011122	0.000734281	3.13414	430	382	66	4527	CIITA,STAT3,ADAR,STAT1,TLR4,IFIH1,ATP8B1,RRAS2,SAMHD1,BOLA-DRA,CASP8,FAS,TNFRSF1A,OSMR,SP110,RIPK1,ADA,IL7,PSMB10,PSMB9,IL4R,B2M,SPP1,BLA-DQB,RFX5,PSMB8,ERAP1,IL6ST,SCN9A,STX11,DCDC2,KIF11,LOC512672,ITGA6,RBCK1,XIAP,DOCK8,MC1R,JMJD1C,MMP1,ASXL1,LYST,ATP2A2,TRAF3IP2,LOC107131209,SRD5A3,IL10RB,IL17RC,IL12A,GJA1,SBDS,LPIN2,NRAS,TJP2,FDPS,EGFR,PIK3CA,HDAC4,MSN,NR3C1,POLR3A,LOC112441463,TNFAIP3,VEGFC,…
HP	Lymphadenopathy	HP:0002716	0.00377435	2.42316	183	382	35	4527	IRF8,STAT3,TLR4,CASP8,FAS,TNFRSF1A,BIRC3,RIPK1,ADA,PSMB9,DAXX,SPP1,PML,PSMB8,ERAP1,STX11,BCOR,ISG15,IL2RB,LOC512672,RAB27A,RBCK1,XIAP,BCL10,ASXL1,LYST,EIF2AK4,LOC107131209,ATM,IL12A,PALLD,NRAS,SNX10,BRCA1,TET2
HP	Increased inflammatory response	HP:0012649	0.00394137	2.40435	910	382	113	4527	IRF8,TAP1,CIITA,STAT3,IRF9,ADAR,STAT1,TLR4,RNF125,IFIH1,ATP8B1,RRAS2,SAMHD1,ATAD1,CASP8,FAS,TNFRSF1A,PNP,BIRC3,CLDN1,SP110,RIPK1,ADA,IL7,PSMB10,PSMB9,IL4R,B2M,SPP1,PML,LOC618733,C3,BLA-DQB,RFX5,PSMB8,ERAP1,IL6ST,SCN9A,STX11,DCDC2,NUP107,BCOR,LOC101906312,RANBP2,IL2RB,TAPBP,KIF11,SPTLC2,LOC512672,STXBP1,SF3B1,ITGA6,RBCK1,XIAP,DOCK8,BCL10,INAVA,SETBP1,CTC1,CD55,JMJD1C,MMP1,LYST,ITCH,GNAQ,MCIDAS,TRA…
HP	Abnormal inflammatory response	HP:0012647	0.00394137	2.40435	910	382	113	4527	IRF8,TAP1,CIITA,STAT3,IRF9,ADAR,STAT1,TLR4,RNF125,IFIH1,ATP8B1,RRAS2,SAMHD1,ATAD1,CASP8,FAS,TNFRSF1A,PNP,BIRC3,CLDN1,SP110,RIPK1,ADA,IL7,PSMB10,PSMB9,IL4R,B2M,SPP1,PML,LOC618733,C3,BLA-DQB,RFX5,PSMB8,ERAP1,IL6ST,SCN9A,STX11,DCDC2,NUP107,BCOR,LOC101906312,RANBP2,IL2RB,TAPBP,KIF11,SPTLC2,LOC512672,STXBP1,SF3B1,ITGA6,RBCK1,XIAP,DOCK8,BCL10,INAVA,SETBP1,CTC1,CD55,JMJD1C,MMP1,LYST,ITCH,GNAQ,MCIDAS,TRA…
HP	Abnormal cellular immune system morphology	HP:0010987	0.00812164	2.09036	506	382	71	4527	CIITA,STAT3,ADAR,STAT1,IFIH1,RRAS2,SAMHD1,CASP8,FAS,TNFRSF1A,PNP,SP110,RIPK1,ADA,IL7,PSMB9,SPP1,PML,RFX5,IL6ST,SCN9A,STX11,ETV6,RBPJ,BCOR,LOC101906312,KIF11,ABL1,LOC512672,SF3B1,RAB27A,TBK1,XIAP,DOCK8,LPP,SETBP1,CTC1,NUP214,ASXL1,LYST,ABCD4,ITCH,ATM,MDM4,SBDS,LPIN2,NRAS,TTI2,RB1,PIK3CA,IRAK4,MSN,APC,TMPO,BAG3,SCARB2,TTC37,MYC,TNFAIP3,BRCA1,PTPN11,NF1,FKTN,TAF1A,TET2,TRNT1,IVD,ATP6AP2,UNC93B1,LAMA…
HP	Abnormal leukocyte morphology	HP:0001881	0.00812164	2.09036	506	382	71	4527	CIITA,STAT3,ADAR,STAT1,IFIH1,RRAS2,SAMHD1,CASP8,FAS,TNFRSF1A,PNP,SP110,RIPK1,ADA,IL7,PSMB9,SPP1,PML,RFX5,IL6ST,SCN9A,STX11,ETV6,RBPJ,BCOR,LOC101906312,KIF11,ABL1,LOC512672,SF3B1,RAB27A,TBK1,XIAP,DOCK8,LPP,SETBP1,CTC1,NUP214,ASXL1,LYST,ABCD4,ITCH,ATM,MDM4,SBDS,LPIN2,NRAS,TTI2,RB1,PIK3CA,IRAK4,MSN,APC,TMPO,BAG3,SCARB2,TTC37,MYC,TNFAIP3,BRCA1,PTPN11,NF1,FKTN,TAF1A,TET2,TRNT1,IVD,ATP6AP2,UNC93B1,LAMA…
HP	Abnormal immune system morphology	HP:0032251	0.0100964	1.99583	528	382	73	4527	CIITA,STAT3,ADAR,STAT1,IFIH1,RRAS2,SAMHD1,CASP8,FAS,TNFRSF1A,PNP,SP110,RIPK1,ADA,IL7,PSMB9,SPP1,PML,RFX5,IL6ST,SCN9A,STX11,ETV6,RBPJ,BCOR,LOC101906312,KIF11,ABL1,LOC512672,SF3B1,RAB27A,TBK1,XIAP,DOCK8,LPP,SETBP1,CTC1,NUP214,ASXL1,LYST,ABCD4,ITCH,IL10RB,ATM,MDM4,SBDS,PALLD,LPIN2,NRAS,TTI2,RB1,PIK3CA,IRAK4,MSN,APC,TMPO,BAG3,SCARB2,TTC37,MYC,TNFAIP3,BRCA1,PTPN11,NF1,FKTN,TAF1A,TET2,TRNT1,IVD,ATP6AP2…
HP	Abnormality of blood and blood-forming tissues	HP:0001871	0.0239806	1.62014	1209	382	138	4527	CIITA,STAT3,ITGA2,ADAR,STAT1,TLR4,GCLC,IFIH1,RRAS2,SAMHD1,CASP8,FAS,TNFRSF1A,PNP,BIRC3,CLDN1,SP110,USP18,RIPK1,ADA,UMPS,IL7,PSMB9,DAXX,SPP1,EPHB2,PML,SDHAF2,C3,BLA-DQB,RFX5,PSMB8,ERAP1,IL6ST,SCN9A,STX11,ETV6,RBPJ,BCOR,CD46,STEAP3,LOC101906312,SLC4A4,ANO6,RANBP2,IL2RB,KIF11,ABL1,LOC512672,STXBP1,SF3B1,RAB27A,ACSL4,ATP6V0A2,TBK1,XIAP,DOCK8,UBR1,BCL10,LPP,SETBP1,C2,CTC1,CD55,SLC20A2,NUP214,JMJD1C,MM…
HP	Encephalitis	HP:0002383	0.0246475	1.60823	35	382	12	4527	CIITA,STAT1,TLR4,FAS,RFX5,ERAP1,LOC512672,XIAP,BCL10,LOC107131209,IL12A,IRF3
HP	Abnormal lymphocyte count	HP:0040088	0.0368713	1.43331	138	382	27	4527	CIITA,STAT1,RRAS2,CASP8,FAS,PNP,SP110,RIPK1,ADA,IL7,PSMB9,SPP1,RFX5,XIAP,DOCK8,ATM,MDM4,NRAS,TTI2,MSN,TTC37,MYC,TNFAIP3,TET2,TRNT1,ATP6AP2,BLM
HP	Papule	HP:0200034	0.0462458	1.33493	81	382	19	4527	STAT3,TLR4,FAS,IL7,ERAP1,LOC101906312,LOC512672,ATP2A2,GNAQ,TRAF3IP2,LOC107131209,CYLD,IL17RC,IL12A,LPIN2,EGFR,PIK3CA,NF1,PLEC
HP	Myositis	HP:0100614	0.0468151	1.32961	37	382	12	4527	ADAR,TLR4,IFIH1,SAMHD1,FAS,TNFRSF1A,PSMB9,SPP1,ERAP1,LOC512672,LOC107131209,IL12A
HP	Inflammatory abnormality of the skin	HP:0011123	0.0470612	1.32734	371	382	54	4527	CIITA,STAT3,ADAR,STAT1,TLR4,IFIH1,RRAS2,SAMHD1,CASP8,FAS,TNFRSF1A,SP110,RIPK1,ADA,IL7,PSMB10,PSMB9,IL4R,B2M,SPP1,BLA-DQB,RFX5,PSMB8,ERAP1,IL6ST,STX11,KIF11,LOC512672,ITGA6,RBCK1,XIAP,DOCK8,JMJD1C,MMP1,LYST,TRAF3IP2,LOC107131209,SRD5A3,IL10RB,IL17RC,IL12A,GJA1,SBDS,LPIN2,EGFR,PIK3CA,HDAC4,MSN,NR3C1,POLR3A,LOC112441463,TNFAIP3,VEGFC,BLM

## Sheet: BL3.1 ISGs GO
source	term_name	term_id	adjusted_p_value	negative_log10_of_adjusted_p_value	term_size	query_size	intersection_size	effective_domain_size	intersections
GO:MF	heterocyclic compound binding	GO:1901363	2.39428e-11	10.6208	5138	1128	461	16724	PARP14,IRF8,STAT3,STAT1,TAP1,LOC513659,LOC512486,GBP4,LOC781710,LOC507055,IRF1,STAT2,MX1,OAS1X,LOC101903126,PLAGL1,RBBP8,LOC511531,DDX58,TRANK1,PIK3C2B,GBP5,PRKG1,CIITA,TOP1,IFI16,EIF2AK2,ADAR,PRKCH,ZBP1,NOTCH1,IRF9,KYNU,LCK,UBA7,IFIT2,RAB27A,IFIT5,ATAD1,CDKN2AIP,ZHX2,KIF15,SP110,MAF,MAPK6,OAS1Z,LOC618733,CREM,ZNFX1,MAFF,IFIH1,TRIM21,SAMHD1,TFEC,RBM43,SDS,IFI44,GIMAP7,KLF10,CSNK1E,RIPK1,DDX3X,DR1…
GO:MF	organic cyclic compound binding	GO:0097159	6.70078e-11	10.1739	5209	1128	464	16724	PARP14,IRF8,STAT3,STAT1,TAP1,LOC513659,LOC512486,GBP4,LOC781710,LOC507055,IRF1,STAT2,MX1,OAS1X,LOC101903126,PLAGL1,RBBP8,LOC511531,DDX58,TRANK1,PIK3C2B,GBP5,PRKG1,CIITA,TOP1,IFI16,EIF2AK2,ADAR,PRKCH,ZBP1,NOTCH1,IRF9,KYNU,LCK,UBA7,IFIT2,RAB27A,IFIT5,ATAD1,CDKN2AIP,ZHX2,KIF15,SP110,MAF,MAPK6,OAS1Z,LOC618733,CREM,ZNFX1,MAFF,IFIH1,TRIM21,SAMHD1,TFEC,RBM43,SDS,IFI44,GIMAP7,KLF10,CSNK1E,RIPK1,DDX3X,DR1…
GO:MF	binding	GO:0005488	2.79487e-10	9.55364	12469	1128	938	16724	PARP14,IRF8,STAT3,STAT1,TAP1,LOC513659,LOC512486,GBP4,LOC781710,LOC507055,IRF1,DTX3L,LOC788334,STAT2,MX1,LAP3,SRGAP1,OAS1X,LOC101903126,PLAGL1,RBBP8,LOC511531,DDX58,CSF1,TRANK1,RNF19B,HPS4,LOC509283,TIFA,PIK3C2B,GBP5,LOC616254,PARP9,PRKG1,CIITA,EED,TOP1,IFI16,EIF2AK2,ADAR,LGALS3BP,APOL3,PHLDA1,STRIP1,PRKCH,NRG2,ZBP1,FERMT3,NT5DC3,NOTCH1,CD47,BAZ1A,CD180,LOC518495,IRF9,LIMA1,MYPN,KYNU,TRIM5,CDADC1…
GO:MF	purine ribonucleoside triphosphate binding	GO:0035639	2.07431e-08	7.68313	1651	1128	179	16724	TAP1,LOC513659,LOC512486,GBP4,LOC781710,LOC507055,MX1,LOC101903126,LOC511531,DDX58,TRANK1,PIK3C2B,GBP5,PRKG1,CIITA,TOP1,EIF2AK2,PRKCH,LCK,UBA7,RAB27A,ATAD1,KIF15,MAPK6,LOC618733,IFIH1,IFI44,GIMAP7,CSNK1E,RIPK1,DDX3X,MAP3K8,PIM1,ATP9A,MAP3K1,RUNX1,RNASEL,CHORDC1,DDX21,DDX6,STK3,DHX58,NOL9,ENTPD1,KIF2C,MAP2K1,IFI47,YME1L1,RHOU,DNAJA1,RAB14,ARF6,UBE2D3,RNGTT,MASTL,CDK17,RAP2A,MYO1E,MX2,SGK1,RFK,SMC5…
GO:MF	purine nucleotide binding	GO:0017076	6.44914e-08	7.1905	1722	1128	183	16724	TAP1,LOC513659,LOC512486,GBP4,LOC781710,LOC507055,MX1,LOC101903126,LOC511531,DDX58,TRANK1,PIK3C2B,GBP5,PRKG1,CIITA,TOP1,EIF2AK2,PRKCH,LCK,UBA7,RAB27A,ATAD1,KIF15,MAPK6,LOC618733,IFIH1,SAMHD1,IFI44,GIMAP7,CSNK1E,RIPK1,DDX3X,MAP3K8,PIM1,ATP9A,MAP3K1,RUNX1,RNASEL,CHORDC1,DDX21,DDX6,STK3,DHX58,NOL9,ENTPD1,KIF2C,MAP2K1,IFI47,YME1L1,RHOU,DNAJA1,RAB14,ARF6,UBE2D3,RNGTT,MASTL,CDK17,RAP2A,MYO1E,MX2,SGK1,R…
GO:MF	purine ribonucleotide binding	GO:0032555	7.86766e-08	7.10415	1702	1128	181	16724	TAP1,LOC513659,LOC512486,GBP4,LOC781710,LOC507055,MX1,LOC101903126,LOC511531,DDX58,TRANK1,PIK3C2B,GBP5,PRKG1,CIITA,TOP1,EIF2AK2,PRKCH,LCK,UBA7,RAB27A,ATAD1,KIF15,MAPK6,LOC618733,IFIH1,IFI44,GIMAP7,CSNK1E,RIPK1,DDX3X,MAP3K8,PIM1,ATP9A,MAP3K1,RUNX1,RNASEL,CHORDC1,DDX21,DDX6,STK3,DHX58,NOL9,ENTPD1,KIF2C,MAP2K1,IFI47,YME1L1,RHOU,DNAJA1,RAB14,ARF6,UBE2D3,RNGTT,MASTL,CDK17,RAP2A,MYO1E,MX2,SGK1,RFK,SMC5…
GO:MF	ribonucleotide binding	GO:0032553	8.63246e-08	7.06387	1716	1128	182	16724	TAP1,LOC513659,LOC512486,GBP4,LOC781710,LOC507055,MX1,LOC101903126,LOC511531,DDX58,TRANK1,PIK3C2B,GBP5,PRKG1,CIITA,TOP1,EIF2AK2,PRKCH,LCK,UBA7,RAB27A,ATAD1,KIF15,MAPK6,LOC618733,IFIH1,IFI44,GIMAP7,CSNK1E,RIPK1,DDX3X,MAP3K8,PIM1,ATP9A,MAP3K1,RUNX1,RNASEL,CHORDC1,DDX21,DDX6,STK3,DHX58,NOL9,ENTPD1,KIF2C,MAP2K1,IFI47,YME1L1,RHOU,DNAJA1,RAB14,ARF6,UBE2D3,RNGTT,MASTL,CDK17,RAP2A,MYO1E,MX2,SGK1,RFK,SMC5…
GO:MF	nucleotide binding	GO:0000166	1.59845e-07	6.7963	1949	1128	200	16724	TAP1,LOC513659,LOC512486,GBP4,LOC781710,LOC507055,MX1,LOC101903126,LOC511531,DDX58,TRANK1,PIK3C2B,GBP5,PRKG1,CIITA,TOP1,EIF2AK2,PRKCH,LCK,UBA7,RAB27A,ATAD1,KIF15,MAPK6,LOC618733,IFIH1,SAMHD1,IFI44,GIMAP7,CSNK1E,RIPK1,DDX3X,MAP3K8,PIM1,ATP9A,MAP3K1,RUNX1,RNASEL,CHORDC1,DDX21,DDX6,STK3,DHX58,NOL9,ENTPD1,KIF2C,MAP2K1,IFI47,YME1L1,RHOU,DNAJA1,RAB14,ARF6,UBE2D3,ACSL5,RNGTT,MASTL,CDK17,RAP2A,MYO1E,MX2,…
GO:MF	nucleoside phosphate binding	GO:1901265	1.59845e-07	6.7963	1949	1128	200	16724	TAP1,LOC513659,LOC512486,GBP4,LOC781710,LOC507055,MX1,LOC101903126,LOC511531,DDX58,TRANK1,PIK3C2B,GBP5,PRKG1,CIITA,TOP1,EIF2AK2,PRKCH,LCK,UBA7,RAB27A,ATAD1,KIF15,MAPK6,LOC618733,IFIH1,SAMHD1,IFI44,GIMAP7,CSNK1E,RIPK1,DDX3X,MAP3K8,PIM1,ATP9A,MAP3K1,RUNX1,RNASEL,CHORDC1,DDX21,DDX6,STK3,DHX58,NOL9,ENTPD1,KIF2C,MAP2K1,IFI47,YME1L1,RHOU,DNAJA1,RAB14,ARF6,UBE2D3,ACSL5,RNGTT,MASTL,CDK17,RAP2A,MYO1E,MX2,…
GO:MF	RNA binding	GO:0003723	1.97821e-07	6.70373	1097	1128	128	16724	STAT3,OAS1X,DDX58,EIF2AK2,ADAR,IFIT2,IFIT5,CDKN2AIP,OAS1Z,ZNFX1,IFIH1,TRIM21,SAMHD1,RBM43,DDX3X,XRN2,SRSF10,RSL1D1,TDRD7,ARID5A,LOC100139670,RNASEL,BRIX1,DDX21,DDX6,DHX58,PNPT1,NUDT7,EYA1,LARP7,TRNT1,OAS1Y,LARP4,ZFP36,FMR1,EIF3J,MYEF2,SRSF1,EIF5,SRSF6,YRDC,YARS2,ELAVL1,SRP54,SRSF3,DIS3,HNRNPA0,RPF2,MTREX,NUFIP2,THUMPD1,CPSF6,MRPL44,SSB,KRR1,SRSF7,NOP58,ISG20,PUS1,SF3B1,PAPOLA,HNRNPAB,QKI,EIF2S1,P…
GO:MF	anion binding	GO:0043168	4.28301e-07	6.36825	2096	1128	210	16724	TAP1,LOC513659,LOC512486,GBP4,LOC781710,LOC507055,MX1,LOC101903126,LOC511531,DDX58,TRANK1,PIK3C2B,GBP5,PRKG1,CIITA,TOP1,EIF2AK2,PRKCH,KYNU,LCK,UBA7,RAB27A,ATAD1,KIF15,MAPK6,LOC618733,MTHFD2,IFIH1,SAMHD1,SDS,IFI44,GIMAP7,CSNK1E,RIPK1,DDX3X,NAPEPLD,MAP3K8,CGAS,PLEK,PIM1,ATP9A,MAP3K1,RUNX1,RNASEL,CHORDC1,DDX21,PICALM,DDX6,STK3,DHX58,PLCL2,SCIN,NOL9,ENTPD1,ALAS1,ARAP2,KIF2C,MAP2K1,IFI47,UBR1,YME1L1,R…
GO:MF	enzyme binding	GO:0019899	5.54052e-07	6.25645	1514	1128	162	16724	PARP14,STAT3,STAT1,DTX3L,RNF19B,HPS4,PARP9,STRIP1,PRKCH,NOTCH1,TRIM5,LCK,PML,MAPK6,PTPN2,LOC616948,SOCS1,TRIM21,FAS,LOC516599,TRIM34,RIPK1,PJA2,JAKMIP3,PLEK,GAB2,ATP9A,TNF,MAP3K1,NOTCH2,IFNAR2,GABARAPL1,PTPRJ,RANBP2,CRK,RTN4,USP25,PICALM,HIF1A,CASP8,RB1,MYOM1,HDAC1,CYLD,TXNIP,HDAC4,AKAP7,TNFRSF1B,MC1R,ARF6,STAP1,CFLAR,GTF2B,SUPT4H1,IBTK,PRKAB2,ZFP36,WDR43,SRSF1,USF1,LYST,RRN3,RNF138,DERL1,ELAVL1,…
GO:MF	catalytic activity	GO:0003824	1.12005e-06	5.95076	5455	1128	459	16724	PARP14,LOC513659,LOC512486,GBP4,LOC781710,LOC507055,DTX3L,MX1,LAP3,OAS1X,RBBP8,LOC511531,DDX58,TRANK1,RNF19B,LOC509283,PIK3C2B,LPIN2,GBP5,PARP9,PRKG1,EED,TOP1,EIF2AK2,ADAR,CASP7,PRKCH,NT5DC3,KYNU,TRIM5,CDADC1,LCK,PSMB9,UBA7,PSMB10,ERAP1,EXT1,HERC4,RAB27A,KIF15,PML,VCPIP1,MAPK6,OAS1Z,TRIM25,RAD1,NAMPT,PCMTD1,MTHFD2,ERAP2,PTPN2,LOC616948,ZNFX1,ZC3HAV1,IFIH1,TRIM21,CMTR2,SAMHD1,PLCXD2,BIRC3,PSMB8,CA…
GO:MF	protein binding	GO:0005515	1.58569e-06	5.79978	7423	1128	595	16724	PARP14,IRF8,STAT3,STAT1,TAP1,LOC781710,DTX3L,MX1,SRGAP1,RBBP8,CSF1,TRANK1,RNF19B,HPS4,TIFA,GBP5,LOC616254,PARP9,PRKG1,CIITA,EED,TOP1,EIF2AK2,ADAR,LGALS3BP,STRIP1,PRKCH,NRG2,FERMT3,NOTCH1,CD47,BAZ1A,CD180,IRF9,LIMA1,MYPN,KYNU,TRIM5,CDADC1,LRP10,LCK,PHACTR2,FNBP1,IFIT2,ERAP1,EXT1,LGALS8,IFIT5,GKAP1,GRAMD2B,CDKN2AIP,NUB1,ZHX2,KIF15,PML,SP110,WDR25,MAPK6,TRIM25,ARHGAP31,KANK4,LOC618733,NAMPT,CRLF3,PT…
GO:MF	nucleic acid binding	GO:0003676	2.59221e-06	5.58633	3241	1128	295	16724	PARP14,IRF8,STAT3,STAT1,IRF1,STAT2,OAS1X,PLAGL1,RBBP8,DDX58,TOP1,IFI16,EIF2AK2,ADAR,ZBP1,NOTCH1,IRF9,IFIT2,IFIT5,CDKN2AIP,ZHX2,SP110,MAF,OAS1Z,CREM,ZNFX1,MAFF,IFIH1,TRIM21,SAMHD1,TFEC,RBM43,KLF10,DDX3X,DR1,XRN2,CGAS,SRSF10,BATF2,TGIF1,RSL1D1,TDRD7,RERE,TNF,ARID5A,LOC100139670,RUNX1,NR2F1,IKZF2,RNASEL,BRIX1,DDX21,STAT4,KLF6,DDX6,CERS5,HIF1A,DHX58,KLF13,RB1,FOS,PNPT1,CREBRF,IRF3,HDAC1,R3HDM4,TBX21,…
GO:MF	transferase activity	GO:0016740	2.95718e-06	5.52912	2144	1128	210	16724	PARP14,DTX3L,OAS1X,RNF19B,LOC509283,PIK3C2B,PARP9,PRKG1,EED,TOP1,EIF2AK2,PRKCH,TRIM5,LCK,EXT1,HERC4,PML,MAPK6,OAS1Z,TRIM25,NAMPT,PCMTD1,LOC616948,ZC3HAV1,TRIM21,CMTR2,BIRC3,LOC516599,TRIM34,CSNK1E,RIPK1,PJA2,TPST2,MAP3K8,MMD,CGAS,ADPGK,RNF31,PIM1,MAP3K1,FTSJ1,PNP,PRMT9,RNASEL,STK3,CERS5,LOC785873,NOL9,ALAS1,PNPT1,MAP2K1,UHRF2,UBR1,PARP12,UGP2,CHSY1,NUP107,PRPF19,ABAT,UBE2D3,TRNT1,RNGTT,MASTL,CDK1…
GO:MF	carbohydrate derivative binding	GO:0097367	6.28888e-06	5.20143	1962	1128	194	16724	TAP1,LOC513659,LOC512486,GBP4,LOC781710,LOC507055,MX1,LOC101903126,LOC511531,DDX58,TRANK1,PIK3C2B,GBP5,PRKG1,CIITA,TOP1,EIF2AK2,PRKCH,LCK,UBA7,RAB27A,ATAD1,KIF15,MAPK6,LOC618733,IFIH1,SAMHD1,IFI44,GIMAP7,CSNK1E,RIPK1,DDX3X,MAP3K8,PIM1,ATP9A,MAP3K1,RUNX1,TLR4,RNASEL,CHORDC1,DDX21,DDX6,STK3,DHX58,NOL9,ENTPD1,KIF2C,MAP2K1,IFI47,CTSS,YME1L1,RHOU,DNAJA1,RAB14,ARF6,UBE2D3,RNGTT,MASTL,CDK17,RAP2A,MYO1E,…
GO:MF	small molecule binding	GO:0036094	9.22863e-06	5.03486	2212	1128	213	16724	TAP1,LOC513659,LOC512486,GBP4,LOC781710,LOC507055,MX1,LOC101903126,LOC511531,DDX58,TRANK1,PIK3C2B,GBP5,PRKG1,CIITA,TOP1,EIF2AK2,PRKCH,KYNU,LCK,UBA7,RAB27A,ATAD1,KIF15,MAPK6,LOC618733,IFIH1,SAMHD1,SDS,IFI44,GIMAP7,CSNK1E,RIPK1,DDX3X,MAP3K8,PIM1,ATP9A,MAP3K1,RUNX1,RNASEL,CHORDC1,DDX21,DDX6,STK3,DHX58,PLCL2,NOL9,ENTPD1,ALAS1,KIF2C,MAP2K1,IFI47,GRAMD1C,YME1L1,RHOU,DNAJA1,RAB14,ABAT,ARF6,UBE2D3,ACSL5,…
GO:MF	identical protein binding	GO:0042802	2.25725e-05	4.64642	1437	1128	149	16724	STAT3,STAT1,LOC781710,MX1,RBBP8,CSF1,HPS4,GBP5,PRKG1,EED,EIF2AK2,NOTCH1,KYNU,TRIM5,CDADC1,LCK,FNBP1,EXT1,GKAP1,GRAMD2B,ZHX2,PML,NAMPT,CRLF3,LOC616948,PSME2,NMI,CD53,IFIH1,TRIM21,SNX16,SAMHD1,FAS,SDS,LOC516599,TRIM34,RIPK1,NAPEPLD,TPST2,XRN2,PLEK,TNF,ARID5A,TLR4,DDX21,AHCYL1,STAT4,STK3,MITD1,CASP8,RB1,ALAS1,GZMA,IFI35,MYOM1,IRF3,IL6ST,UGP2,HDAC4,PRPF19,ABAT,MCL1,BCL6,CGGBP1,PRKAB2,FMR1,EIF3J,LNPK,…
GO:MF	double-stranded RNA binding	GO:0003725	4.26561e-05	4.37002	69	1128	19	16724	OAS1X,DDX58,EIF2AK2,ADAR,OAS1Z,IFIH1,DDX3X,DDX21,DHX58,OAS1Y,FMR1,YRDC,ELAVL1,MRPL44,RC3H2,DHX36,AGO3,MTDH,RC3H1
GO:MF	ion binding	GO:0043167	6.56582e-05	4.18271	4548	1128	383	16724	TAP1,LOC513659,LOC512486,GBP4,LOC781710,LOC507055,DTX3L,MX1,LAP3,LOC101903126,LOC511531,DDX58,TRANK1,RNF19B,LOC509283,PIK3C2B,GBP5,PRKG1,CIITA,TOP1,EIF2AK2,PRKCH,NT5DC3,NOTCH1,BAZ1A,LIMA1,KYNU,TRIM5,CDADC1,LCK,UBA7,ERAP1,RAB27A,ATAD1,KIF15,PML,SP110,MAPK6,TRIM25,LOC618733,MTHFD2,ERAP2,LOC616948,ZNFX1,ZC3HAV1,IFIH1,TRIM21,SAMHD1,BIRC3,SDS,IFI44,LOC516599,TRIM34,GIMAP7,CSNK1E,RIPK1,MAN1A1,PJA2,TES,…
GO:MF	ATP binding	GO:0005524	0.000144163	3.84115	1297	1128	134	16724	TAP1,DDX58,TRANK1,PIK3C2B,PRKG1,CIITA,TOP1,EIF2AK2,PRKCH,LCK,UBA7,ATAD1,KIF15,MAPK6,LOC618733,IFIH1,CSNK1E,RIPK1,DDX3X,MAP3K8,PIM1,ATP9A,MAP3K1,RUNX1,RNASEL,CHORDC1,DDX21,DDX6,STK3,DHX58,NOL9,ENTPD1,KIF2C,MAP2K1,YME1L1,DNAJA1,UBE2D3,MASTL,CDK17,MYO1E,SGK1,RFK,SMC5,DNAJA2,ATAD2B,YARS2,BTAF1,DDX18,MAP4K5,KIF23,MTREX,EIF4A2,N4BP2,TBK1,DGKD,CDK19,ABCE1,MKNK1,PAPOLA,IRAK4,RAD50,FBH1,HLTF,KIF18A,PAICS,…
GO:MF	adenyl ribonucleotide binding	GO:0032559	0.000293315	3.53267	1338	1128	136	16724	TAP1,DDX58,TRANK1,PIK3C2B,PRKG1,CIITA,TOP1,EIF2AK2,PRKCH,LCK,UBA7,ATAD1,KIF15,MAPK6,LOC618733,IFIH1,CSNK1E,RIPK1,DDX3X,MAP3K8,PIM1,ATP9A,MAP3K1,RUNX1,RNASEL,CHORDC1,DDX21,DDX6,STK3,DHX58,NOL9,ENTPD1,KIF2C,MAP2K1,YME1L1,DNAJA1,UBE2D3,MASTL,CDK17,MYO1E,SGK1,RFK,SMC5,DNAJA2,ATAD2B,YARS2,BTAF1,DDX18,MAP4K5,KIF23,MTREX,EIF4A2,N4BP2,TBK1,DGKD,CDK19,ABCE1,MKNK1,PAPOLA,HMGCR,IRAK4,RAD50,FBH1,HLTF,KIF18A,…
GO:MF	adenyl nucleotide binding	GO:0030554	0.000462102	3.33526	1349	1128	136	16724	TAP1,DDX58,TRANK1,PIK3C2B,PRKG1,CIITA,TOP1,EIF2AK2,PRKCH,LCK,UBA7,ATAD1,KIF15,MAPK6,LOC618733,IFIH1,CSNK1E,RIPK1,DDX3X,MAP3K8,PIM1,ATP9A,MAP3K1,RUNX1,RNASEL,CHORDC1,DDX21,DDX6,STK3,DHX58,NOL9,ENTPD1,KIF2C,MAP2K1,YME1L1,DNAJA1,UBE2D3,MASTL,CDK17,MYO1E,SGK1,RFK,SMC5,DNAJA2,ATAD2B,YARS2,BTAF1,DDX18,MAP4K5,KIF23,MTREX,EIF4A2,N4BP2,TBK1,DGKD,CDK19,ABCE1,MKNK1,PAPOLA,HMGCR,IRAK4,RAD50,FBH1,HLTF,KIF18A,…
GO:MF	transcription coregulator activity	GO:0003712	0.000496963	3.30368	393	1128	53	16724	PARP14,RBBP8,LPIN2,PARP9,NOTCH1,TRIM25,NMI,TRIM21,SFMBT2,DR1,RERE,ARID5A,TRIM38,MED13,BCL3,HDAC1,HDAC4,IRF4,BCL9L,BTAF1,CCAR1,BCLAF1,CITED2,ZMIZ1,ARID5B,HDGFL3,TSG101,PPRC1,C1D,MIER1,TCERG1,BASP1,SLC30A9,ASXL1,NUPR1,XPC,AKIRIN1,TBL1X,DAXX,CBFB,NCOA7,ARID3A,MTDH,PARP10,CNOT7,HDAC7,N4BP2L2,CEBPZ,SCAI,MED1,TRERF1,MYSM1,DDX17
GO:MF	catalytic activity, acting on a protein	GO:0140096	0.000549205	3.26027	2215	1128	204	16724	PARP14,DTX3L,LAP3,RNF19B,LOC509283,PARP9,PRKG1,EED,TOP1,EIF2AK2,CASP7,PRKCH,TRIM5,LCK,PSMB9,UBA7,PSMB10,ERAP1,HERC4,PML,VCPIP1,MAPK6,TRIM25,PCMTD1,ERAP2,PTPN2,LOC616948,TRIM21,BIRC3,PSMB8,CASP4,LOC516599,TRIM34,CSNK1E,RIPK1,PJA2,TPST2,CTDSPL,MAP3K8,MMD,RNF31,PIM1,MAP3K1,PTPRJ,PRMT9,USP18,RNASEL,C1RL,RANBP2,USP25,STK3,LOC785873,CASP8,GZMA,HDAC1,MAP2K1,CYLD,CTSS,UHRF2,UBR1,PARP12,YME1L1,USP9X,HDAC4…
GO:MF	ribonucleoprotein complex binding	GO:0043021	0.000892247	3.04951	106	1128	22	16724	IFIH1,DDX3X,PIM1,RNASEL,NAA15,FMR1,NMD3,DERL1,PHF6,SRP54,CPSF6,ABCE1,EIF2S1,LTN1,SBDS,DDX5,TMCO1,NEMF,EIF2A,PRMT3,ITCH,RICTOR
GO:MF	ubiquitin-protein transferase activity	GO:0004842	0.00150546	2.82233	376	1128	50	16724	DTX3L,RNF19B,LOC509283,TRIM5,HERC4,PML,TRIM25,LOC616948,TRIM21,BIRC3,LOC516599,TRIM34,PJA2,RNF31,LOC785873,UHRF2,UBR1,PRPF19,UBE2D3,RNF122,RNF138,PELI1,G2E3,RNF19A,TNFAIP1,RBCK1,RNF141,BFAR,MDM2,LTN1,RNF114,UBR2,NEDD4L,RC3H2,RCHY1,RNF11,BIRC2,CUL4B,HECTD2,RLIM,ITCH,FANCL,UBE2Q2,RC3H1,UBE2D1,CBLL1,CUL2,NSMCE2,CUL5,C24H18ORF25
GO:MF	guanyl nucleotide binding	GO:0019001	0.0016879	2.77265	388	1128	51	16724	LOC513659,LOC512486,GBP4,LOC781710,LOC507055,MX1,LOC101903126,LOC511531,GBP5,RAB27A,SAMHD1,IFI44,GIMAP7,IFI47,RHOU,RAB14,ARF6,RNGTT,RAP2A,MX2,EIF5,SRP54,RAB12,ARL5B,LOC615733,KRAS,RAB33B,GSPT1,RAB32,GUCY1A1,DYNC1LI1,RHOT1,GTPBP4,RASD1,GIMAP8,BMS1,RAP1B,OLA1,NRAS,DIRAS2,TUBE1,ARL2,DNM1L,LRRK2,GIMAP6,LRRK1,ARL8B,RAB21,THG1L,ARL4A,GNAQ
GO:MF	protein homodimerization activity	GO:0042803	0.00188278	2.7252	508	1128	62	16724	STAT3,STAT1,LOC781710,CSF1,HPS4,GBP5,KYNU,TRIM5,CDADC1,EXT1,ZHX2,PML,LOC616948,TRIM21,SDS,LOC516599,TRIM34,RIPK1,TPST2,PLEK,GZMA,MYOM1,IRF3,MCL1,FMR1,USF1,XPA,YARS2,ELAVL1,CALCOCO2,PNPO,BCL2,DGKD,CARNMT1,QTRT2,TSG101,HM13,DCK,MGAT2,HHEX,TPD52,SMCHD1,RCHY1,UBA5,MTPAP,CIP2A,HMGCS1,AIMP1,ST3GAL2,ABCD3,SH3GLB1,UHRF1BP1L,DNM1L,HSD17B4,SPPL2A,TDG,SMAD4,LRRK2,STK26,TYW5,GLA,NR2C1
GO:MF	core promoter sequence-specific DNA binding	GO:0001046	0.00295462	2.5295	33	1128	11	16724	STAT1,KLF10,DR1,FOS,HDAC1,GTF2B,RRN3,GTF2A1,NR3C1,TAF1B,SNAPC3
GO:MF	GTP binding	GO:0005525	0.00320887	2.49365	365	1128	48	16724	LOC513659,LOC512486,GBP4,LOC781710,LOC507055,MX1,LOC101903126,LOC511531,GBP5,RAB27A,IFI44,GIMAP7,IFI47,RHOU,RAB14,ARF6,RNGTT,RAP2A,MX2,EIF5,SRP54,RAB12,ARL5B,LOC615733,KRAS,RAB33B,GSPT1,RAB32,GUCY1A1,RHOT1,GTPBP4,RASD1,GIMAP8,BMS1,RAP1B,OLA1,NRAS,DIRAS2,TUBE1,ARL2,DNM1L,LRRK2,GIMAP6,LRRK1,ARL8B,RAB21,THG1L,ARL4A
GO:MF	guanyl ribonucleotide binding	GO:0032561	0.00444222	2.3524	380	1128	49	16724	LOC513659,LOC512486,GBP4,LOC781710,LOC507055,MX1,LOC101903126,LOC511531,GBP5,RAB27A,IFI44,GIMAP7,IFI47,RHOU,RAB14,ARF6,RNGTT,RAP2A,MX2,EIF5,SRP54,RAB12,ARL5B,LOC615733,KRAS,RAB33B,GSPT1,RAB32,GUCY1A1,DYNC1LI1,RHOT1,GTPBP4,RASD1,GIMAP8,BMS1,RAP1B,OLA1,NRAS,DIRAS2,TUBE1,ARL2,DNM1L,LRRK2,GIMAP6,LRRK1,ARL8B,RAB21,THG1L,ARL4A
GO:MF	ubiquitin-like protein transferase activity	GO:0019787	0.00561953	2.2503	394	1128	50	16724	DTX3L,RNF19B,LOC509283,TRIM5,HERC4,PML,TRIM25,LOC616948,TRIM21,BIRC3,LOC516599,TRIM34,PJA2,RNF31,LOC785873,UHRF2,UBR1,PRPF19,UBE2D3,RNF122,RNF138,PELI1,G2E3,RNF19A,TNFAIP1,RBCK1,RNF141,BFAR,MDM2,LTN1,RNF114,UBR2,NEDD4L,RC3H2,RCHY1,RNF11,BIRC2,CUL4B,HECTD2,RLIM,ITCH,FANCL,UBE2Q2,RC3H1,UBE2D1,CBLL1,CUL2,NSMCE2,CUL5,C24H18ORF25
GO:MF	ubiquitin-like protein ligase binding	GO:0044389	0.00819012	2.08671	243	1128	35	16724	STAT1,DTX3L,PARP9,PML,RIPK1,GABARAPL1,CRK,RTN4,USP25,HIF1A,CASP8,RB1,TXNIP,TNFRSF1B,MC1R,DERL1,BCL2,TSG101,PSMA3,HLTF,HM13,SLF1,DAXX,CUL4B,DET1,DNM1L,HSPA6,ITCH,FANCL,CCT2,CUL2,SMC6,GLMN,CUL5,SLF2
GO:MF	transcription corepressor activity	GO:0003714	0.00998519	2.00064	140	1128	24	16724	PARP14,RBBP8,PARP9,SFMBT2,DR1,RERE,ARID5A,HDAC1,HDAC4,CCAR1,CITED2,TSG101,C1D,MIER1,BASP1,TBL1X,DAXX,PARP10,CNOT7,HDAC7,N4BP2L2,SCAI,MED1,TRERF1
GO:MF	ATPase	GO:0016887	0.0208879	1.68011	526	1128	60	16724	TAP1,DDX58,LOC509283,ATAD1,KIF15,LOC618733,ZNFX1,IFIH1,DDX3X,ATP9A,DDX21,DDX6,DHX58,KIF2C,YME1L1,ACSL5,MYO1E,SMC5,ATAD2B,BTAF1,DDX18,KIF23,MTREX,EIF4A2,ABCE1,ZGRF1,RAD50,FBH1,HLTF,KIF18A,YTHDC2,KIF5B,PMS1,DHX36,DDX5,TMEM30A,SMC4,ATP13A3,KIF3A,XRCC6,KIF28,ABCD3,HELLS,FANCM,ACSL4,ATP11B,CCT6A,DHX40,HSPA6,SMC2,CCT4,HSPD1,CCT2,HSP90AA1,RAD51C,SMC6,ATAD5,ATP7A,ABCD4,DDX17
GO:MF	protein domain specific binding	GO:0019904	0.0251292	1.59982	439	1128	52	16724	TOP1,MYPN,LCK,ARHGAP31,OSTF1,RIPK1,INPP5A,CRK,DDX6,MITD1,HIF1A,CASP8,RB1,IRF3,HDAC1,AFAP1L2,MCL1,CLCN3,AIDA,XPA,CITED2,BCL2,LIN7C,EZR,SRSF7,YWHAG,NDFIP2,BASP1,ABI1,RBM39,TRA2B,CHMP2B,ETV6,DDX5,EPB41L2,ARFIP1,PLEKHA1,PTPN12,KPNB1,CAPN7,CHEK1,CCT6A,CTR9,SRRM2,ADAM19,CBX3,CDC5L,LANCL1,MED1,DFFB,NCK1,APP
GO:MF	RNA polymerase binding	GO:0070063	0.029177	1.53496	48	1128	12	16724	GTF2B,SUPT4H1,ZFP36,WDR43,RRN3,YTHDC2,TCERG1,CCNT1,LEO1,CCNT2,CTR9,PCF11
GO:MF	chromatin binding	GO:0003682	0.0292688	1.53359	464	1128	54	16724	STAT3,STAT1,TOP1,NOTCH1,SFMBT2,CGAS,RERE,ARID5A,FOS,HDAC1,HDAC4,JARID2,BCL6,GTF2B,HMGN4,NAP1L1,ATAD2B,MLLT6,CITED2,EGR1,TFAM,STAG2,NOC3L,CCNT1,SLC30A9,ASXL1,TTF1,NUPR1,SP3,SMC4,TAF2,VRK1,CCNT2,L3MBTL3,HELLS,ARID3A,MCMBP,FANCM,LOC112441545,PBRM1,HDAC7,SUZ12,SMC2,POLR2B,ATF2,SMAD4,ZNF276,BMI1,MED1,ACTR6,PRDM1,IFT74,MPHOSPH8,HMGN1
GO:MF	mRNA binding	GO:0003729	0.0305138	1.5155	238	1128	33	16724	DDX3X,RSL1D1,TDRD7,DDX6,LARP4,ZFP36,FMR1,MYEF2,SRSF1,SRSF6,ELAVL1,HNRNPA0,CPSF6,SSB,SF3B1,FUBP1,ETF1,SYNCRIP,THOC2,RC3H2,TRA2B,EIF4G3,DHX36,DDX5,EIF2S2,RBM25,EIF2A,CSTF2T,IREB2,CELF1,PCF11,SRRM2,RC3H1
GO:MF	ubiquitin protein ligase binding	GO:0031625	0.0440325	1.35623	222	1128	31	16724	PML,RIPK1,GABARAPL1,CRK,RTN4,USP25,HIF1A,CASP8,RB1,TXNIP,TNFRSF1B,MC1R,DERL1,BCL2,TSG101,PSMA3,HLTF,HM13,SLF1,DAXX,CUL4B,DET1,DNM1L,HSPA6,FANCL,CCT2,CUL2,SMC6,GLMN,CUL5,SLF2
GO:MF	RNA helicase activity	GO:0003724	0.049314	1.30703	58	1128	13	16724	DDX58,IFIH1,DDX3X,DDX21,DDX6,DHX58,MTREX,EIF4A2,YTHDC2,DHX36,DDX5,DHX40,DDX17
GO:BP	cellular metabolic process	GO:0044237	9.54669e-20	19.0201	9278	1198	807	17231	PARP14,IRF8,STAT3,STAT1,IRF1,DTX3L,P2RY6,STAT2,OAS1X,PLAGL1,RBBP8,SBNO2,CSF1,RNF19B,LOC509283,PIK3C2B,LPIN2,PARP9,PRKG1,CIITA,EED,TOP1,EIF2AK2,ADAR,PHLDA1,PRKCH,NT5DC3,NOTCH1,BAZ1A,IRF9,KYNU,TRIM5,CDADC1,LCK,PSMB9,UBA7,PHACTR2,PSMB10,ERAP1,EXT1,HERC4,LGALS8,ATAD1,ZHX2,PML,SP110,MAF,VCPIP1,MAPK6,OAS1Z,TRIM25,RAD1,NAMPT,CRLF3,PCMTD1,MTHFD2,PTPN2,CREM,GINS2,LOC616948,SOCS1,LOC100298356,ZNFX1,ZC3HAV1…
GO:BP	nucleobase-containing compound metabolic process	GO:0006139	7.14308e-18	17.1461	4629	1198	466	17231	PARP14,IRF8,STAT3,STAT1,IRF1,DTX3L,STAT2,OAS1X,PLAGL1,RBBP8,SBNO2,LPIN2,CIITA,TOP1,EIF2AK2,ADAR,NOTCH1,IRF9,KYNU,TRIM5,CDADC1,ZHX2,PML,SP110,MAF,VCPIP1,OAS1Z,TRIM25,RAD1,NAMPT,CRLF3,PTPN2,CREM,GINS2,LOC616948,ZNFX1,ZC3HAV1,NMI,MAFF,TRIM21,CMTR2,SP140L,SAMHD1,TFEC,LOC516599,TRIM34,KLF10,SFMBT2,RIPK1,DDX3X,DR1,XRN2,CGAS,SRSF10,BATF2,PIM1,TGIF1,RSL1D1,RERE,TNF,ARID5A,FTSJ1,NOTCH2,RUNX1,TLR4,NR2F1,PN…
GO:BP	heterocycle metabolic process	GO:0046483	1.01618e-17	16.993	4727	1198	473	17231	PARP14,IRF8,STAT3,STAT1,IRF1,DTX3L,STAT2,OAS1X,PLAGL1,RBBP8,SBNO2,LPIN2,CIITA,TOP1,EIF2AK2,ADAR,NOTCH1,IRF9,KYNU,TRIM5,CDADC1,ZHX2,PML,SP110,MAF,VCPIP1,OAS1Z,TRIM25,RAD1,NAMPT,CRLF3,MTHFD2,PTPN2,CREM,GINS2,LOC616948,ZNFX1,ZC3HAV1,NMI,MAFF,TRIM21,CMTR2,SP140L,SAMHD1,TFEC,LOC516599,TRIM34,KLF10,SFMBT2,RIPK1,DDX3X,DR1,XRN2,CGAS,SRSF10,BATF2,PIM1,TGIF1,RSL1D1,RERE,TNF,ARID5A,FTSJ1,NOTCH2,RUNX1,TLR4,N…
GO:BP	nucleic acid metabolic process	GO:0090304	2.829e-17	16.5484	4236	1198	433	17231	PARP14,IRF8,STAT3,STAT1,IRF1,DTX3L,STAT2,OAS1X,PLAGL1,RBBP8,SBNO2,LPIN2,CIITA,TOP1,EIF2AK2,ADAR,NOTCH1,IRF9,TRIM5,CDADC1,ZHX2,PML,SP110,MAF,VCPIP1,OAS1Z,TRIM25,RAD1,NAMPT,CRLF3,PTPN2,CREM,GINS2,LOC616948,ZNFX1,ZC3HAV1,NMI,MAFF,TRIM21,CMTR2,SP140L,SAMHD1,TFEC,LOC516599,TRIM34,KLF10,SFMBT2,RIPK1,DDX3X,DR1,XRN2,CGAS,SRSF10,BATF2,PIM1,TGIF1,RSL1D1,RERE,TNF,ARID5A,FTSJ1,NOTCH2,RUNX1,TLR4,NR2F1,PRMT9,I…
GO:BP	cellular aromatic compound metabolic process	GO:0006725	3.8288e-17	16.4169	4782	1198	475	17231	PARP14,IRF8,STAT3,STAT1,IRF1,DTX3L,STAT2,OAS1X,PLAGL1,RBBP8,SBNO2,LPIN2,CIITA,TOP1,EIF2AK2,ADAR,NOTCH1,IRF9,KYNU,TRIM5,CDADC1,ZHX2,PML,SP110,MAF,VCPIP1,OAS1Z,TRIM25,RAD1,NAMPT,CRLF3,MTHFD2,PTPN2,CREM,GINS2,LOC616948,ZNFX1,ZC3HAV1,NMI,MAFF,TRIM21,CMTR2,SP140L,SAMHD1,TFEC,LOC516599,TRIM34,KLF10,SFMBT2,RIPK1,DDX3X,DR1,XRN2,CGAS,SRSF10,BATF2,PIM1,TGIF1,RSL1D1,RERE,TNF,ARID5A,FTSJ1,NOTCH2,RUNX1,TLR4,N…
GO:BP	nitrogen compound metabolic process	GO:0006807	3.98494e-17	16.3996	8701	1198	758	17231	PARP14,IRF8,STAT3,STAT1,IRF1,DTX3L,LOC788334,STAT2,LAP3,OAS1X,PLAGL1,RBBP8,SBNO2,CSF1,RNF19B,LOC509283,LPIN2,PARP9,PRKG1,CIITA,EED,TOP1,EIF2AK2,ADAR,CASP7,APOL3,PHLDA1,PRKCH,NOTCH1,LOC518495,IRF9,KYNU,TRIM5,CDADC1,LCK,PSMB9,UBA7,PHACTR2,PSMB10,ERAP1,EXT1,HERC4,ZHX2,PML,SP110,MAF,VCPIP1,MAPK6,OAS1Z,TRIM25,RAD1,NAMPT,CRLF3,PCMTD1,MTHFD2,ERAP2,PTPN2,CREM,GINS2,LOC616948,SOCS1,LOC100298356,ZNFX1,ZC3H…
GO:BP	primary metabolic process	GO:0044238	8.08501e-17	16.0923	9179	1198	789	17231	PARP14,IRF8,STAT3,STAT1,IRF1,DTX3L,P2RY6,LOC788334,STAT2,LAP3,OAS1X,PLAGL1,RBBP8,SBNO2,CSF1,RNF19B,LOC509283,PIK3C2B,LPIN2,PARP9,PRKG1,CIITA,EED,TOP1,EIF2AK2,ADAR,CASP7,APOL3,PHLDA1,PRKCH,NOTCH1,LOC518495,IRF9,KYNU,TRIM5,CDADC1,LRP10,LCK,PSMB9,UBA7,PHACTR2,PSMB10,ERAP1,EXT1,HERC4,ZHX2,PML,SP110,MAF,VCPIP1,MAPK6,OAS1Z,TRIM25,RAD1,NAMPT,CRLF3,PCMTD1,ERAP2,PTPN2,CREM,GINS2,LOC616948,SOCS1,LOC1002983…
GO:BP	organic substance metabolic process	GO:0071704	1.17218e-16	15.931	9746	1198	826	17231	PARP14,IRF8,STAT3,STAT1,IRF1,DTX3L,P2RY6,LOC788334,STAT2,LAP3,OAS1X,PLAGL1,RBBP8,SBNO2,DDX58,CSF1,RNF19B,LOC509283,PIK3C2B,LPIN2,GBP5,PARP9,PRKG1,CIITA,EED,TOP1,EIF2AK2,ADAR,CASP7,APOL3,PHLDA1,PRKCH,NOTCH1,CD47,BAZ1A,LOC518495,IRF9,KYNU,TRIM5,CDADC1,LRP10,LCK,PSMB9,UBA7,PHACTR2,PSMB10,ERAP1,EXT1,HERC4,ATAD1,ZHX2,PML,SP110,MAF,VCPIP1,MAPK6,OAS1Z,TRIM25,RAD1,NAMPT,CRLF3,PCMTD1,MTHFD2,ERAP2,PTPN2,CR…
GO:BP	organic cyclic compound metabolic process	GO:1901360	1.71836e-16	15.7649	4933	1198	484	17231	PARP14,IRF8,STAT3,STAT1,IRF1,DTX3L,STAT2,OAS1X,PLAGL1,RBBP8,SBNO2,LPIN2,CIITA,TOP1,EIF2AK2,ADAR,NOTCH1,IRF9,KYNU,TRIM5,CDADC1,ZHX2,PML,SP110,MAF,VCPIP1,OAS1Z,TRIM25,RAD1,NAMPT,CRLF3,MTHFD2,PTPN2,CREM,GINS2,LOC616948,ZNFX1,ZC3HAV1,NMI,MAFF,TRIM21,CMTR2,SP140L,SAMHD1,TFEC,LOC516599,TRIM34,KLF10,SFMBT2,RIPK1,DDX3X,DR1,XRN2,CGAS,SRSF10,BATF2,PIM1,TGIF1,RSL1D1,RERE,TNF,ARID5A,FTSJ1,NOTCH2,RUNX1,TLR4,N…
GO:BP	macromolecule metabolic process	GO:0043170	1.7712e-16	15.7517	8374	1198	733	17231	PARP14,IRF8,STAT3,STAT1,IRF1,DTX3L,LOC788334,STAT2,LAP3,OAS1X,PLAGL1,RBBP8,SBNO2,DDX58,CSF1,RNF19B,LOC509283,LPIN2,GBP5,PARP9,PRKG1,CIITA,EED,TOP1,EIF2AK2,ADAR,CASP7,APOL3,PHLDA1,PRKCH,NOTCH1,CD47,BAZ1A,LOC518495,IRF9,TRIM5,CDADC1,LCK,PSMB9,UBA7,PHACTR2,PSMB10,ERAP1,EXT1,HERC4,ATAD1,ZHX2,PML,SP110,MAF,VCPIP1,MAPK6,OAS1Z,TRIM25,RAD1,NAMPT,CRLF3,PCMTD1,ERAP2,PTPN2,CREM,GINS2,LOC616948,SOCS1,LOC1002…
GO:BP	metabolic process	GO:0008152	4.69772e-16	15.3281	10242	1198	856	17231	PARP14,IRF8,STAT3,STAT1,IRF1,DTX3L,P2RY6,LOC788334,STAT2,LAP3,OAS1X,PLAGL1,RBBP8,SBNO2,DDX58,CSF1,RNF19B,LOC509283,PIK3C2B,LPIN2,GBP5,PARP9,PRKG1,CIITA,EED,TOP1,EIF2AK2,ADAR,CASP7,APOL3,PHLDA1,PRKCH,NT5DC3,NOTCH1,CD47,BAZ1A,LOC518495,IRF9,KYNU,TRIM5,CDADC1,LRP10,LCK,PSMB9,UBA7,PHACTR2,PSMB10,ERAP1,EXT1,HERC4,LGALS8,ATAD1,ZHX2,PML,SP110,MAF,VCPIP1,MAPK6,OAS1Z,TRIM25,RAD1,NAMPT,CRLF3,PCMTD1,MTHFD2,…
GO:BP	cellular nitrogen compound metabolic process	GO:0034641	1.70318e-14	13.7687	5426	1198	513	17231	PARP14,IRF8,STAT3,STAT1,IRF1,DTX3L,STAT2,OAS1X,PLAGL1,RBBP8,SBNO2,LPIN2,CIITA,TOP1,EIF2AK2,ADAR,NOTCH1,IRF9,KYNU,TRIM5,CDADC1,ERAP1,ZHX2,PML,SP110,MAF,VCPIP1,OAS1Z,TRIM25,RAD1,NAMPT,CRLF3,PTPN2,CREM,GINS2,LOC616948,ZNFX1,ZC3HAV1,NMI,MAFF,TRIM21,CMTR2,SP140L,SAMHD1,TFEC,LOC516599,TRIM34,KLF10,SFMBT2,RIPK1,DDX3X,NAPEPLD,DR1,XRN2,CGAS,SRSF10,BATF2,PIM1,TGIF1,RSL1D1,RERE,TNF,ARID5A,FTSJ1,NOTCH2,RUNX1…
GO:BP	immune system process	GO:0002376	5.33474e-14	13.2729	1988	1198	235	17231	PARP14,IRF8,STAT3,STAT1,TAP1,LOC513659,LOC512486,GBP4,LOC781710,LOC507055,IRF1,DTX3L,STAT2,MX1,OAS1X,SBNO2,LOC511531,B2M,DDX58,CSF1,RNF19B,TIFA,GBP5,PARP9,CIITA,IFI16,EIF2AK2,FCGR2A,ADAR,ZBP1,NOTCH1,CD47,CD180,IRF9,KYNU,TRIM5,LCK,PSMB9,IFI44L,PSMB10,IFIT2,ERAP1,EXT1,LOC512672,LGALS8,IFIT5,FCGR3A,PML,OAS1Z,TRIM25,LOC618733,ERAP2,PTPN2,LOC616948,SOCS1,LOC100298356,NMI,IFIH1,TRIM21,SAMHD1,LOC1124415…
GO:BP	positive regulation of cellular process	GO:0048522	2.63155e-13	12.5798	4274	1198	420	17231	PARP14,IRF8,STAT3,STAT1,IRF1,DTX3L,P2RY6,PLAGL1,SBNO2,CSF1,RNF19B,TIFA,LPIN2,GBP5,PARP9,CIITA,EIF2AK2,PHLDA1,PRKCH,ZBP1,FERMT3,NOTCH1,CD47,CD180,TRIM5,LCK,IFIT2,RAB27A,IFIT5,GKAP1,ATAD1,CDKN2AIP,PML,MAF,TRIM25,LOC618733,NAMPT,CRLF3,PTGDR2,PTPN2,LOC616948,SOCS1,ZC3HAV1,NMI,CD53,MAFF,TRIM21,TFEC,BIRC3,SEH1L,FAS,BMF,SOCS3,LOC516599,TRIM34,KLF10,CD274,CSNK1E,RIPK1,PJA2,PMAIP1,DDX3X,NAPEPLD,DR1,MAP3K8…
GO:BP	response to virus	GO:0009615	7.47507e-13	12.1264	254	1198	58	17231	STAT1,IRF1,DTX3L,MX1,OAS1X,DDX58,EIF2AK2,ADAR,ZBP1,TRIM5,IFI44L,IFIT2,EXT1,LGALS8,IFIT5,OAS1Z,LOC616948,LOC100298356,ZC3HAV1,NMI,IFIH1,SAMHD1,LOC112441507,LOC516599,PMAIP1,DDX3X,CGAS,TNF,LOC100139670,IFNAR2,RNASEL,DDX21,HIF1A,DHX58,BCL3,PSMA2,IRF3,TBX21,ISG15,OAS1Y,MX2,ELMOD2,FMR1,USP15,BCL2,TTC4,ISG20,SMPD1,TICAM2,DHX36,IRF7,ACTA2,APOBEC3H,CNOT7,ITCH,IRF2,IFITM3,LOC618737
GO:BP	cellular macromolecule metabolic process	GO:0044260	1.07669e-12	11.9679	7029	1198	622	17231	PARP14,IRF8,STAT3,STAT1,IRF1,DTX3L,STAT2,PLAGL1,RBBP8,SBNO2,CSF1,RNF19B,LOC509283,LPIN2,PARP9,PRKG1,CIITA,EED,TOP1,EIF2AK2,ADAR,PHLDA1,PRKCH,NOTCH1,BAZ1A,IRF9,TRIM5,CDADC1,LCK,PSMB9,UBA7,PHACTR2,PSMB10,EXT1,HERC4,ATAD1,ZHX2,PML,SP110,MAF,VCPIP1,MAPK6,TRIM25,RAD1,NAMPT,CRLF3,PCMTD1,PTPN2,CREM,GINS2,LOC616948,SOCS1,LOC100298356,ZNFX1,ZC3HAV1,NMI,MAFF,IFIH1,TRIM21,CMTR2,SP140L,SAMHD1,LOC112441507,TF…
GO:BP	positive regulation of biological process	GO:0048518	4.86487e-12	11.3129	4684	1198	446	17231	PARP14,IRF8,STAT3,STAT1,IRF1,DTX3L,P2RY6,PLAGL1,SBNO2,DDX58,CSF1,RNF19B,TIFA,LPIN2,GBP5,PARP9,CIITA,IFI16,EIF2AK2,ADAR,PHLDA1,PRKCH,ZBP1,FERMT3,NOTCH1,CD47,CD180,TRIM5,LCK,IFIT2,RAB27A,IFIT5,FCGR3A,GKAP1,ATAD1,CDKN2AIP,PML,MAF,MAPK6,TRIM25,LOC618733,NAMPT,CRLF3,PTGDR2,PTPN2,LOC616948,SOCS1,ZC3HAV1,NMI,CD53,MAFF,IFIH1,TRIM21,TFEC,BIRC3,SEH1L,FAS,BMF,SOCS3,LOC516599,TRIM34,KLF10,CD274,CSNK1E,RIPK1,…
GO:BP	regulation of viral process	GO:0050792	6.89105e-12	11.1617	132	1198	39	17231	STAT1,MX1,OAS1X,EIF2AK2,ADAR,NOTCH1,TRIM5,IFIT5,PML,OAS1Z,TRIM25,LOC616948,ZC3HAV1,TRIM21,LOC516599,TRIM34,DDX3X,TNF,LOC100139670,RNASEL,TRIM38,LOC785873,ISG15,MDFIC,LARP7,OAS1Y,ZFP36,FMR1,BCL2,ISG20,TSG101,CHMP2B,SRPK1,APOBEC3H,PARP10,CNOT7,IFITM3,MPHOSPH8,PPID
GO:BP	response to stress	GO:0006950	7.01265e-12	11.1541	2627	1198	282	17231	PARP14,IRF8,STAT3,STAT1,TAP1,LOC513659,LOC512486,GBP4,LOC781710,LOC507055,IRF1,DTX3L,STAT2,MX1,OAS1X,RBBP8,SBNO2,LOC511531,DDX58,CSF1,RNF19B,TIFA,PIK3C2B,GBP5,PARP9,PRKG1,CIITA,IFI16,EIF2AK2,ADAR,ZBP1,FERMT3,NOTCH1,CD47,KYNU,TRIM5,LCK,UBA7,IFI44L,IFIT2,EXT1,LGALS8,IFIT5,CDKN2AIP,PML,VCPIP1,OAS1Z,TRIM25,RAD1,PTPN2,GINS2,LOC616948,SOCS1,LOC100298356,NMI,IFIH1,TRIM21,SAMHD1,LOC112441507,TFEC,SEH1L,F…
GO:BP	RNA metabolic process	GO:0016070	1.17119e-11	10.9314	3815	1198	377	17231	PARP14,IRF8,STAT3,STAT1,IRF1,DTX3L,STAT2,OAS1X,PLAGL1,SBNO2,LPIN2,CIITA,EIF2AK2,ADAR,NOTCH1,IRF9,TRIM5,ZHX2,PML,SP110,MAF,OAS1Z,TRIM25,NAMPT,CRLF3,PTPN2,CREM,LOC616948,ZNFX1,ZC3HAV1,NMI,MAFF,TRIM21,CMTR2,SP140L,TFEC,LOC516599,TRIM34,KLF10,SFMBT2,RIPK1,DDX3X,DR1,XRN2,SRSF10,BATF2,PIM1,TGIF1,RSL1D1,RERE,TNF,ARID5A,FTSJ1,NOTCH2,RUNX1,TLR4,NR2F1,PRMT9,IKZF2,RNASEL,BRIX1,DDX21,F2R,AHCYL1,STAT4,KLF6,PI…
GO:BP	macromolecule modification	GO:0043412	1.85949e-11	10.7306	3322	1198	337	17231	PARP14,DTX3L,CSF1,RNF19B,LOC509283,PARP9,PRKG1,EED,TOP1,EIF2AK2,ADAR,PRKCH,TRIM5,CDADC1,LCK,UBA7,PHACTR2,EXT1,HERC4,PML,VCPIP1,MAPK6,TRIM25,PCMTD1,PTPN2,LOC616948,SOCS1,NMI,IFIH1,TRIM21,CMTR2,BIRC3,FAS,SOCS3,LOC516599,TRIM34,CSNK1E,RIPK1,MAN1A1,PJA2,DDX3X,TPST2,DR1,CTDSPL,MAP3K8,MMD,RNF31,KLHL3,PIM1,PPP2R5B,TNF,MAP3K1,ARID5A,FTSJ1,TLR4,DIP2B,PTPRJ,PRMT9,USP18,RNASEL,MORC3,CHORDC1,RANBP2,USP25,STK…
GO:BP	positive regulation of metabolic process	GO:0009893	3.83136e-11	10.4166	2881	1198	300	17231	PARP14,IRF8,STAT3,STAT1,IRF1,DTX3L,P2RY6,PLAGL1,SBNO2,DDX58,CSF1,RNF19B,LPIN2,GBP5,CIITA,EIF2AK2,ADAR,NOTCH1,TRIM5,LCK,ATAD1,PML,MAF,TRIM25,NAMPT,CRLF3,PTPN2,LOC616948,SOCS1,ZC3HAV1,NMI,MAFF,IFIH1,TRIM21,TFEC,BIRC3,FAS,LOC516599,TRIM34,KLF10,CSNK1E,RIPK1,PMAIP1,DDX3X,DR1,MAP3K8,MMD,CGAS,PLEK,GJA1,PIM1,RERE,TNF,ARID5A,RUNX1,TLR4,DIP2B,RNASEL,DDX21,F2R,RANBP2,STAT4,KLF6,PICALM,STK3,HIF1A,DHX58,MED1…
GO:BP	positive regulation of cellular metabolic process	GO:0031325	6.09526e-11	10.215	2527	1198	270	17231	PARP14,IRF8,STAT3,STAT1,IRF1,DTX3L,P2RY6,PLAGL1,SBNO2,CSF1,RNF19B,LPIN2,CIITA,EIF2AK2,NOTCH1,TRIM5,LCK,ATAD1,PML,MAF,TRIM25,NAMPT,CRLF3,PTPN2,LOC616948,SOCS1,ZC3HAV1,NMI,MAFF,TRIM21,TFEC,BIRC3,FAS,LOC516599,TRIM34,KLF10,CSNK1E,RIPK1,PMAIP1,DDX3X,DR1,MAP3K8,MMD,PLEK,PIM1,RERE,TNF,ARID5A,RUNX1,TLR4,DIP2B,RNASEL,F2R,RANBP2,STAT4,KLF6,PICALM,STK3,HIF1A,MED13,CASP8,BCL3,RB1,FOS,PNPT1,CREBRF,IRF3,HDAC1…
GO:BP	response to biotic stimulus	GO:0009607	9.31159e-11	10.031	1006	1198	135	17231	PARP14,IRF8,STAT1,LOC513659,LOC512486,GBP4,LOC781710,LOC507055,IRF1,DTX3L,STAT2,MX1,OAS1X,SBNO2,LOC511531,DDX58,CSF1,RNF19B,TIFA,GBP5,PARP9,CIITA,IFI16,EIF2AK2,ADAR,ZBP1,CD180,KYNU,TRIM5,LCK,IFI44L,IFIT2,EXT1,LGALS8,IFIT5,PML,OAS1Z,TRIM25,LOC618733,PTPN2,LOC616948,SOCS1,LOC100298356,ZC3HAV1,NMI,IFIH1,TRIM21,SAMHD1,LOC112441507,SEH1L,IFI44,LOC516599,TRIM34,CD274,PJA2,PMAIP1,DDX3X,CGAS,BATF2,TNF,AR…
GO:BP	regulation of viral life cycle	GO:1903900	1.58547e-10	9.79984	118	1198	35	17231	MX1,OAS1X,EIF2AK2,ADAR,NOTCH1,TRIM5,IFIT5,PML,OAS1Z,TRIM25,LOC616948,ZC3HAV1,TRIM21,LOC516599,TRIM34,DDX3X,TNF,LOC100139670,RNASEL,TRIM38,LOC785873,ISG15,OAS1Y,FMR1,BCL2,ISG20,TSG101,CHMP2B,SRPK1,APOBEC3H,PARP10,CNOT7,IFITM3,MPHOSPH8,PPID
GO:BP	regulation of macromolecule metabolic process	GO:0060255	1.89431e-10	9.72255	5047	1198	466	17231	PARP14,IRF8,STAT3,STAT1,IRF1,DTX3L,STAT2,OAS1X,PLAGL1,SBNO2,DDX58,CSF1,RNF19B,LPIN2,GBP5,PARP9,CIITA,TOP1,EIF2AK2,ADAR,NOTCH1,CD47,IRF9,TRIM5,LCK,PSMB9,PHACTR2,ATAD1,ZHX2,PML,SP110,MAF,OAS1Z,TRIM25,NAMPT,CRLF3,PTPN2,CREM,LOC616948,SOCS1,LOC100298356,ZNFX1,ZC3HAV1,NMI,MAFF,IFIH1,TRIM21,SP140L,LOC112441507,TFEC,BIRC3,PSMB8,FAS,SOCS3,LOC516599,TRIM34,KLF10,SFMBT2,CSNK1E,RIPK1,PMAIP1,DDX3X,DR1,CTDSPL…
GO:BP	RNA processing	GO:0006396	2.67129e-10	9.57328	784	1198	112	17231	STAT3,ADAR,CMTR2,RIPK1,XRN2,SRSF10,RSL1D1,TNF,FTSJ1,PRMT9,RNASEL,BRIX1,AHCYL1,NOL9,PNPT1,MAP2K1,SCAF11,ELAC2,PRPF19,RBFA,UTP15,LARP7,TRNT1,RNGTT,TRMT13,SUPT4H1,WDR75,FMR1,WDR43,SRSF1,SRSF6,TXNL4B,SRSF3,RPF2,MTREX,THUMPD1,CPSF6,MRPL44,SSB,SRSF7,NOL11,PUS1,SF3B1,PAPOLA,QTRT2,CSTF1,C1D,CDC40,RBM17,PRPF38B,SMNDC1,METTL4,SRRM1,SBDS,CCNT1,THOC2,DCPS,RBM39,TRA2B,ESF1,PAPOLG,SRSF11,LEO1,DHX36,WDR12,DDX5,…
GO:BP	positive regulation of macromolecule metabolic process	GO:0010604	2.75843e-10	9.55934	2680	1198	280	17231	PARP14,IRF8,STAT3,STAT1,IRF1,DTX3L,PLAGL1,SBNO2,DDX58,CSF1,RNF19B,LPIN2,GBP5,CIITA,EIF2AK2,ADAR,NOTCH1,LCK,ATAD1,PML,MAF,TRIM25,NAMPT,CRLF3,SOCS1,ZC3HAV1,NMI,MAFF,IFIH1,TRIM21,TFEC,BIRC3,FAS,KLF10,CSNK1E,RIPK1,PMAIP1,DDX3X,DR1,MAP3K8,MMD,CGAS,GJA1,PIM1,RERE,TNF,ARID5A,RUNX1,TLR4,DIP2B,RNASEL,DDX21,F2R,STAT4,KLF6,PICALM,STK3,HIF1A,DHX58,MED13,CASP8,BCL3,RB1,FOS,PNPT1,CREBRF,MYOM1,IRF3,HDAC1,IER2,A…
GO:BP	cellular protein modification process	GO:0006464	4.42297e-10	9.35429	3159	1198	318	17231	PARP14,DTX3L,CSF1,RNF19B,LOC509283,PARP9,PRKG1,EED,TOP1,EIF2AK2,ADAR,PRKCH,TRIM5,LCK,UBA7,PHACTR2,EXT1,HERC4,PML,VCPIP1,MAPK6,TRIM25,PCMTD1,PTPN2,LOC616948,SOCS1,NMI,IFIH1,TRIM21,BIRC3,FAS,SOCS3,LOC516599,TRIM34,CSNK1E,RIPK1,MAN1A1,PJA2,DDX3X,TPST2,DR1,CTDSPL,MAP3K8,MMD,RNF31,KLHL3,PIM1,PPP2R5B,TNF,MAP3K1,ARID5A,TLR4,DIP2B,PTPRJ,PRMT9,USP18,RNASEL,MORC3,CHORDC1,RANBP2,USP25,STK3,LOC785873,HIF1A,P…
GO:BP	protein modification process	GO:0036211	4.42297e-10	9.35429	3159	1198	318	17231	PARP14,DTX3L,CSF1,RNF19B,LOC509283,PARP9,PRKG1,EED,TOP1,EIF2AK2,ADAR,PRKCH,TRIM5,LCK,UBA7,PHACTR2,EXT1,HERC4,PML,VCPIP1,MAPK6,TRIM25,PCMTD1,PTPN2,LOC616948,SOCS1,NMI,IFIH1,TRIM21,BIRC3,FAS,SOCS3,LOC516599,TRIM34,CSNK1E,RIPK1,MAN1A1,PJA2,DDX3X,TPST2,DR1,CTDSPL,MAP3K8,MMD,RNF31,KLHL3,PIM1,PPP2R5B,TNF,MAP3K1,ARID5A,TLR4,DIP2B,PTPRJ,PRMT9,USP18,RNASEL,MORC3,CHORDC1,RANBP2,USP25,STK3,LOC785873,HIF1A,P…
GO:BP	response to other organism	GO:0051707	4.69e-10	9.32883	975	1198	130	17231	PARP14,IRF8,STAT1,LOC513659,LOC512486,GBP4,LOC781710,LOC507055,IRF1,DTX3L,STAT2,MX1,OAS1X,SBNO2,LOC511531,DDX58,CSF1,RNF19B,TIFA,GBP5,PARP9,CIITA,IFI16,EIF2AK2,ADAR,ZBP1,CD180,KYNU,TRIM5,LCK,IFI44L,IFIT2,EXT1,LGALS8,IFIT5,PML,OAS1Z,TRIM25,LOC618733,PTPN2,LOC616948,SOCS1,LOC100298356,ZC3HAV1,NMI,IFIH1,TRIM21,SAMHD1,LOC112441507,SEH1L,IFI44,LOC516599,TRIM34,CD274,PJA2,PMAIP1,DDX3X,CGAS,BATF2,TNF,AR…
GO:BP	response to external biotic stimulus	GO:0043207	5.06032e-10	9.29582	976	1198	130	17231	PARP14,IRF8,STAT1,LOC513659,LOC512486,GBP4,LOC781710,LOC507055,IRF1,DTX3L,STAT2,MX1,OAS1X,SBNO2,LOC511531,DDX58,CSF1,RNF19B,TIFA,GBP5,PARP9,CIITA,IFI16,EIF2AK2,ADAR,ZBP1,CD180,KYNU,TRIM5,LCK,IFI44L,IFIT2,EXT1,LGALS8,IFIT5,PML,OAS1Z,TRIM25,LOC618733,PTPN2,LOC616948,SOCS1,LOC100298356,ZC3HAV1,NMI,IFIH1,TRIM21,SAMHD1,LOC112441507,SEH1L,IFI44,LOC516599,TRIM34,CD274,PJA2,PMAIP1,DDX3X,CGAS,BATF2,TNF,AR…
GO:BP	regulation of metabolic process	GO:0019222	6.32789e-10	9.19874	5430	1198	492	17231	PARP14,IRF8,STAT3,STAT1,IRF1,DTX3L,P2RY6,STAT2,OAS1X,PLAGL1,SBNO2,DDX58,CSF1,RNF19B,LPIN2,GBP5,PARP9,CIITA,TOP1,EIF2AK2,ADAR,NOTCH1,CD47,IRF9,TRIM5,LCK,PSMB9,PHACTR2,ATAD1,ZHX2,PML,SP110,MAF,OAS1Z,TRIM25,NAMPT,CRLF3,PTPN2,CREM,LOC616948,SOCS1,LOC100298356,ZNFX1,ZC3HAV1,NMI,MAFF,IFIH1,TRIM21,SP140L,LOC112441507,TFEC,BIRC3,PSMB8,FAS,BMF,SOCS3,LOC516599,TRIM34,KLF10,SFMBT2,CSNK1E,RIPK1,PMAIP1,DDX3X,…
GO:BP	regulation of cellular metabolic process	GO:0031323	7.81198e-10	9.10724	4888	1198	451	17231	PARP14,IRF8,STAT3,STAT1,IRF1,DTX3L,P2RY6,STAT2,OAS1X,PLAGL1,SBNO2,CSF1,RNF19B,LPIN2,CIITA,EIF2AK2,ADAR,NOTCH1,IRF9,TRIM5,LCK,PHACTR2,ATAD1,ZHX2,PML,SP110,MAF,OAS1Z,TRIM25,NAMPT,CRLF3,PTPN2,CREM,LOC616948,SOCS1,LOC100298356,ZNFX1,ZC3HAV1,NMI,MAFF,TRIM21,SP140L,LOC112441507,TFEC,BIRC3,FAS,BMF,SOCS3,LOC516599,TRIM34,KLF10,SFMBT2,CSNK1E,RIPK1,PMAIP1,DDX3X,DR1,CTDSPL,MAP3K8,MMD,DRAM2,CGAS,PLEK,BATF2,P…
GO:BP	regulation of nitrogen compound metabolic process	GO:0051171	1.37591e-09	8.86141	4587	1198	427	17231	PARP14,IRF8,STAT3,STAT1,IRF1,DTX3L,STAT2,OAS1X,PLAGL1,SBNO2,CSF1,RNF19B,LPIN2,CIITA,EIF2AK2,ADAR,NOTCH1,IRF9,TRIM5,LCK,PSMB9,PHACTR2,ZHX2,PML,SP110,MAF,OAS1Z,TRIM25,NAMPT,CRLF3,PTPN2,CREM,LOC616948,SOCS1,LOC100298356,ZNFX1,ZC3HAV1,NMI,MAFF,TRIM21,SP140L,LOC112441507,TFEC,BIRC3,PSMB8,FAS,SOCS3,LOC516599,TRIM34,KLF10,SFMBT2,CSNK1E,RIPK1,PMAIP1,DDX3X,DR1,CTDSPL,MAP3K8,MMD,CGAS,BATF2,PIM1,TGIF1,RERE,…
GO:BP	biological process involved in interspecies interaction between organisms	GO:0044419	1.46872e-09	8.83306	1075	1198	138	17231	PARP14,IRF8,STAT1,LOC513659,LOC512486,GBP4,LOC781710,LOC507055,IRF1,DTX3L,STAT2,MX1,OAS1X,SBNO2,LOC511531,DDX58,CSF1,RNF19B,TIFA,GBP5,PARP9,CIITA,IFI16,EIF2AK2,ADAR,ZBP1,CD180,KYNU,TRIM5,LCK,IFI44L,IFIT2,EXT1,LGALS8,IFIT5,PML,OAS1Z,TRIM25,LOC618733,PTPN2,LOC616948,SOCS1,LOC100298356,ZC3HAV1,NMI,IFIH1,TRIM21,SAMHD1,LOC112441507,SEH1L,IFI44,LOC516599,TRIM34,CD274,PJA2,PMAIP1,DDX3X,NAPEPLD,CGAS,BATF…
GO:BP	protein modification by small protein conjugation or removal	GO:0070647	1.55788e-09	8.80747	815	1198	113	17231	DTX3L,RNF19B,LOC509283,TRIM5,UBA7,HERC4,PML,VCPIP1,TRIM25,LOC616948,SOCS1,NMI,IFIH1,TRIM21,BIRC3,LOC516599,TRIM34,PJA2,DDX3X,RNF31,KLHL3,USP18,RANBP2,USP25,LOC785873,HIF1A,CYLD,ISG15,UHRF2,UBR1,USP9X,HDAC4,EYA1,PRPF19,PSMD10,UBE2D3,MASTL,RNF122,ATXN7,DCUN1D5,PCGF5,USP15,RNF138,DERL1,OTUD4,PELI1,BCL2,G2E3,RNF19A,ZMIZ1,TNFAIP1,RBCK1,EGR1,RNF141,BFAR,FBH1,MDM2,NDFIP2,LTN1,UCHL5,RNF114,UBE2V2,UBB,ASX…
GO:BP	regulation of primary metabolic process	GO:0080090	1.77845e-09	8.74996	4713	1198	436	17231	PARP14,IRF8,STAT3,STAT1,IRF1,DTX3L,P2RY6,STAT2,OAS1X,PLAGL1,SBNO2,CSF1,RNF19B,LPIN2,CIITA,EIF2AK2,ADAR,NOTCH1,IRF9,TRIM5,LCK,PSMB9,PHACTR2,ZHX2,PML,SP110,MAF,OAS1Z,TRIM25,NAMPT,CRLF3,PTPN2,CREM,LOC616948,SOCS1,LOC100298356,ZNFX1,ZC3HAV1,NMI,MAFF,TRIM21,SP140L,LOC112441507,TFEC,BIRC3,PSMB8,FAS,SOCS3,LOC516599,TRIM34,KLF10,SFMBT2,CSNK1E,RIPK1,PMAIP1,DDX3X,DR1,CTDSPL,MAP3K8,MMD,CGAS,PLEK,BATF2,PIM1,…
GO:BP	positive regulation of nitrogen compound metabolic process	GO:0051173	6.35298e-09	8.19702	2385	1198	250	17231	PARP14,IRF8,STAT3,STAT1,IRF1,DTX3L,PLAGL1,SBNO2,CSF1,RNF19B,LPIN2,CIITA,EIF2AK2,NOTCH1,LCK,PML,MAF,TRIM25,NAMPT,CRLF3,SOCS1,ZC3HAV1,NMI,MAFF,TRIM21,TFEC,BIRC3,FAS,KLF10,CSNK1E,RIPK1,PMAIP1,DDX3X,DR1,MAP3K8,MMD,PIM1,RERE,TNF,ARID5A,RUNX1,TLR4,DIP2B,RNASEL,F2R,STAT4,KLF6,PICALM,STK3,HIF1A,MED13,CASP8,BCL3,RB1,FOS,PNPT1,CREBRF,IRF3,HDAC1,IER2,AFAP1L2,MAP2K1,IL6ST,TBX21,PPP2R3C,MDFIC,PPP1R16B,PSME1,U…
GO:BP	immune response	GO:0006955	9.27506e-09	8.03268	1299	1198	156	17231	PARP14,IRF8,STAT3,STAT1,TAP1,LOC513659,LOC512486,GBP4,LOC781710,LOC507055,IRF1,DTX3L,STAT2,MX1,OAS1X,SBNO2,LOC511531,B2M,DDX58,CSF1,RNF19B,TIFA,GBP5,PARP9,CIITA,IFI16,EIF2AK2,FCGR2A,ADAR,ZBP1,NOTCH1,CD180,KYNU,TRIM5,LCK,IFI44L,IFIT2,EXT1,LGALS8,IFIT5,FCGR3A,PML,OAS1Z,TRIM25,LOC618733,PTPN2,LOC616948,SOCS1,LOC100298356,NMI,IFIH1,TRIM21,SAMHD1,LOC112441507,SEH1L,FAS,IFI44,LOC516599,TRIM34,CD274,PJA…
GO:BP	viral process	GO:0016032	1.44917e-08	7.83888	257	1198	51	17231	STAT1,MX1,OAS1X,EIF2AK2,ADAR,NOTCH1,TRIM5,IFIT5,PML,OAS1Z,TRIM25,LOC616948,ZC3HAV1,TRIM21,LOC516599,TRIM34,DDX3X,TNF,LOC100139670,RNASEL,TRIM38,DDX6,LOC785873,HDAC1,ISG15,MDFIC,LARP7,OAS1Y,GTF2B,ZFP36,ZNF639,FMR1,USF1,BCL2,SSB,ISG20,SMPD1,TSG101,YTHDC2,CHMP2B,CCNT2,ROCK2,SRPK1,APOBEC3H,PARP10,CNOT7,IFITM3,EPS15,ARL8B,MPHOSPH8,PPID
GO:BP	negative regulation of viral process	GO:0048525	1.4499e-08	7.83866	67	1198	24	17231	STAT1,MX1,OAS1X,EIF2AK2,IFIT5,PML,OAS1Z,TRIM25,ZC3HAV1,TRIM21,TNF,LOC100139670,RNASEL,LOC785873,ISG15,LARP7,OAS1Y,ZFP36,ISG20,SRPK1,APOBEC3H,PARP10,IFITM3,MPHOSPH8
GO:BP	regulation of viral genome replication	GO:0045069	1.71176e-08	7.76656	62	1198	23	17231	MX1,OAS1X,EIF2AK2,ADAR,NOTCH1,IFIT5,OAS1Z,ZC3HAV1,DDX3X,TNF,LOC100139670,RNASEL,ISG15,OAS1Y,BCL2,ISG20,SRPK1,APOBEC3H,PARP10,CNOT7,IFITM3,MPHOSPH8,PPID
GO:BP	response to cytokine	GO:0034097	1.82411e-08	7.73895	653	1198	94	17231	PARP14,IRF8,STAT3,STAT1,LOC513659,LOC512486,GBP4,LOC781710,LOC507055,IRF1,STAT2,MX1,SBNO2,LOC511531,CSF1,GBP5,PARP9,CIITA,IFI16,EIF2AK2,ADAR,ZBP1,CD47,KYNU,IFIT2,EXT1,PML,TRIM25,PTPN2,SOCS1,NMI,IFIH1,TRIM21,SAMHD1,FAS,SOCS3,RIPK1,IL15RA,TNF,LOC100139670,IL2RA,IFNAR2,TLR4,STAT4,HIF1A,CASP8,PNPT1,IRF3,IFI47,CYLD,IL6ST,ISG15,HDAC4,TNFRSF1B,MCL1,JARID2,STAP1,MX2,ZFP36,OTUD4,CALCOCO2,SRSF3,BCL2,B3GNT2…
GO:BP	defense response to symbiont	GO:0140546	2.53489e-08	7.59604	197	1198	43	17231	STAT1,IRF1,DTX3L,MX1,OAS1X,DDX58,EIF2AK2,ADAR,ZBP1,TRIM5,IFI44L,IFIT2,IFIT5,OAS1Z,LOC616948,LOC100298356,IFIH1,SAMHD1,LOC112441507,LOC516599,PMAIP1,CGAS,LOC100139670,IFNAR2,RNASEL,DHX58,IRF3,ISG15,OAS1Y,MX2,ELMOD2,USP15,BCL2,TTC4,ISG20,TICAM2,IRF7,APOBEC3H,CNOT7,ITCH,IRF2,IFITM3,LOC618737
GO:BP	defense response to virus	GO:0051607	2.53489e-08	7.59604	197	1198	43	17231	STAT1,IRF1,DTX3L,MX1,OAS1X,DDX58,EIF2AK2,ADAR,ZBP1,TRIM5,IFI44L,IFIT2,IFIT5,OAS1Z,LOC616948,LOC100298356,IFIH1,SAMHD1,LOC112441507,LOC516599,PMAIP1,CGAS,LOC100139670,IFNAR2,RNASEL,DHX58,IRF3,ISG15,OAS1Y,MX2,ELMOD2,USP15,BCL2,TTC4,ISG20,TICAM2,IRF7,APOBEC3H,CNOT7,ITCH,IRF2,IFITM3,LOC618737
GO:BP	protein modification by small protein conjugation	GO:0032446	6.45015e-08	7.19043	698	1198	97	17231	DTX3L,RNF19B,LOC509283,TRIM5,UBA7,HERC4,PML,VCPIP1,TRIM25,LOC616948,SOCS1,NMI,IFIH1,TRIM21,BIRC3,LOC516599,TRIM34,PJA2,DDX3X,RNF31,KLHL3,RANBP2,LOC785873,HIF1A,ISG15,UHRF2,UBR1,HDAC4,EYA1,PRPF19,PSMD10,UBE2D3,MASTL,RNF122,DCUN1D5,PCGF5,RNF138,DERL1,PELI1,BCL2,G2E3,RNF19A,ZMIZ1,TNFAIP1,RBCK1,EGR1,RNF141,BFAR,FBH1,MDM2,NDFIP2,LTN1,RNF114,UBE2V2,UBB,UBR2,NEDD4L,RC3H2,LEO1,RCHY1,UBQLN1,UBA6,CDC27,RNF…
GO:BP	gene expression	GO:0010467	1.11568e-07	6.95246	5025	1198	450	17231	PARP14,IRF8,STAT3,STAT1,IRF1,DTX3L,STAT2,PLAGL1,SBNO2,DDX58,CSF1,LPIN2,GBP5,PARP9,CIITA,TOP1,EIF2AK2,ADAR,CASP7,NOTCH1,CD47,IRF9,TRIM5,EXT1,ZHX2,PML,SP110,MAF,TRIM25,NAMPT,CRLF3,PTPN2,CREM,LOC616948,SOCS1,ZNFX1,ZC3HAV1,NMI,MAFF,IFIH1,TRIM21,CMTR2,SP140L,SAMHD1,TFEC,LOC516599,TRIM34,KLF10,SFMBT2,CSNK1E,RIPK1,DDX3X,DR1,XRN2,CGAS,GJA1,SRSF10,BATF2,PIM1,TGIF1,RSL1D1,TDRD7,RERE,TNF,ARID5A,TAPBP,FTSJ1,…
GO:BP	viral life cycle	GO:0019058	1.15724e-07	6.93658	198	1198	42	17231	MX1,OAS1X,EIF2AK2,ADAR,NOTCH1,TRIM5,IFIT5,PML,OAS1Z,TRIM25,LOC616948,ZC3HAV1,TRIM21,LOC516599,TRIM34,DDX3X,TNF,LOC100139670,RNASEL,TRIM38,DDX6,LOC785873,ISG15,OAS1Y,ZNF639,FMR1,BCL2,ISG20,SMPD1,TSG101,YTHDC2,CHMP2B,ROCK2,SRPK1,APOBEC3H,PARP10,CNOT7,IFITM3,EPS15,ARL8B,MPHOSPH8,PPID
GO:BP	cellular response to stress	GO:0033554	1.80045e-07	6.74462	1361	1198	157	17231	DTX3L,RBBP8,PIK3C2B,EIF2AK2,NOTCH1,UBA7,CDKN2AIP,PML,VCPIP1,TRIM25,RAD1,PTPN2,GINS2,SAMHD1,TFEC,SEH1L,FAS,KLF10,RIPK1,MAN1A1,PJA2,PMAIP1,DDX3X,CGAS,RSL1D1,TNF,TLR4,CHORDC1,RELL1,USP25,STK3,HIF1A,BCL3,FOS,PNPT1,WDR24,MAP2K1,CYLD,VAV3,MDFIC,NUP107,TNFRSF1B,EYA1,PRPF19,MC1R,PSMD10,MCL1,TMEM33,BCL6,GADD45B,RAP2A,VEGFA,ZFP36,DCLRE1A,AIDA,SMC5,FMR1,TM7SF3,DCUN1D5,PPP4R2,MYEF2,XPA,RNF138,DERL1,SERP1,BCL…
GO:BP	defense response to other organism	GO:0098542	2.39991e-07	6.6198	735	1198	99	17231	PARP14,IRF8,STAT1,LOC513659,LOC512486,GBP4,LOC781710,LOC507055,IRF1,DTX3L,STAT2,MX1,OAS1X,LOC511531,DDX58,CSF1,RNF19B,TIFA,GBP5,PARP9,CIITA,IFI16,EIF2AK2,ADAR,ZBP1,KYNU,TRIM5,LCK,IFI44L,IFIT2,LGALS8,IFIT5,PML,OAS1Z,TRIM25,PTPN2,LOC616948,SOCS1,LOC100298356,NMI,IFIH1,TRIM21,SAMHD1,LOC112441507,SEH1L,LOC516599,TRIM34,PJA2,PMAIP1,DDX3X,CGAS,BATF2,TNF,LOC100139670,NOTCH2,IFNAR2,TLR4,RNASEL,LOC1071312…
GO:BP	viral genome replication	GO:0019079	3.6783e-07	6.43435	89	1198	26	17231	MX1,OAS1X,EIF2AK2,ADAR,NOTCH1,IFIT5,OAS1Z,ZC3HAV1,DDX3X,TNF,LOC100139670,RNASEL,ISG15,OAS1Y,FMR1,BCL2,ISG20,YTHDC2,ROCK2,SRPK1,APOBEC3H,PARP10,CNOT7,IFITM3,MPHOSPH8,PPID
GO:BP	negative regulation of viral genome replication	GO:0045071	7.40246e-07	6.13062	40	1198	17	17231	MX1,OAS1X,EIF2AK2,IFIT5,OAS1Z,ZC3HAV1,TNF,LOC100139670,RNASEL,ISG15,OAS1Y,ISG20,SRPK1,APOBEC3H,PARP10,IFITM3,MPHOSPH8
GO:BP	regulation of nucleobase-containing compound metabolic process	GO:0019219	7.9973e-07	6.09706	3214	1198	307	17231	PARP14,IRF8,STAT3,STAT1,IRF1,DTX3L,STAT2,OAS1X,PLAGL1,SBNO2,LPIN2,CIITA,EIF2AK2,NOTCH1,IRF9,TRIM5,ZHX2,PML,SP110,MAF,OAS1Z,TRIM25,NAMPT,CRLF3,PTPN2,CREM,LOC616948,ZNFX1,ZC3HAV1,MAFF,TRIM21,SP140L,TFEC,LOC516599,TRIM34,KLF10,SFMBT2,RIPK1,DDX3X,DR1,CGAS,BATF2,PIM1,TGIF1,RERE,TNF,ARID5A,NOTCH2,RUNX1,TLR4,NR2F1,IKZF2,RNASEL,F2R,AHCYL1,STAT4,KLF6,PICALM,TRIM38,STK3,LOC785873,HIF1A,MED13,KLF13,BCL3,RB1…
GO:BP	innate immune response	GO:0045087	1.08472e-06	5.96468	492	1198	73	17231	PARP14,IRF8,STAT1,LOC513659,LOC512486,GBP4,LOC781710,LOC507055,IRF1,STAT2,MX1,OAS1X,LOC511531,DDX58,CSF1,RNF19B,TIFA,GBP5,PARP9,CIITA,IFI16,ADAR,ZBP1,KYNU,TRIM5,LCK,PML,OAS1Z,TRIM25,PTPN2,LOC616948,SOCS1,LOC100298356,NMI,IFIH1,TRIM21,SAMHD1,LOC112441507,LOC516599,TRIM34,PJA2,DDX3X,CGAS,LOC100139670,IFNAR2,TLR4,LOC107131209,LOC785873,DHX58,IFI35,C4A,IRF3,CYLD,ISG15,OAS1Y,LYST,CALCOCO2,TBK1,TTC4,IP…
GO:BP	programmed necrotic cell death	GO:0097300	1.08914e-06	5.96292	36	1198	16	17231	ZBP1,BIRC3,FAS,RIPK1,RNF31,TNF,CASP8,IRF3,CYLD,CFLAR,PELI1,RBCK1,NUPR1,BIRC2,TRPM7,DNM1L
GO:BP	positive regulation of nucleobase-containing compound metabolic process	GO:0045935	1.25198e-06	5.9024	1524	1198	168	17231	IRF8,STAT3,STAT1,IRF1,DTX3L,PLAGL1,SBNO2,LPIN2,CIITA,NOTCH1,PML,MAF,TRIM25,NAMPT,CRLF3,ZC3HAV1,MAFF,TRIM21,TFEC,KLF10,RIPK1,DDX3X,DR1,PIM1,RERE,TNF,ARID5A,RUNX1,TLR4,RNASEL,F2R,STAT4,KLF6,PICALM,HIF1A,MED13,BCL3,RB1,FOS,PNPT1,CREBRF,IRF3,HDAC1,IER2,AFAP1L2,MAP2K1,TBX21,MDFIC,USP9X,HDAC4,TNFRSF1B,EYA1,PRPF19,UTP15,MC1R,LARP7,IRF4,ELF2,BCL9L,VEGFA,SUPT4H1,NAA15,WDR75,ZFP36,ZNF639,WDR43,ATAD2B,PCGF5…
GO:BP	protein ubiquitination	GO:0016567	2.33307e-06	5.63207	641	1198	87	17231	DTX3L,RNF19B,LOC509283,TRIM5,UBA7,HERC4,PML,VCPIP1,TRIM25,LOC616948,SOCS1,NMI,TRIM21,BIRC3,LOC516599,TRIM34,PJA2,DDX3X,RNF31,KLHL3,LOC785873,ISG15,UHRF2,UBR1,PRPF19,PSMD10,UBE2D3,MASTL,RNF122,PCGF5,RNF138,DERL1,PELI1,BCL2,G2E3,RNF19A,TNFAIP1,RBCK1,RNF141,BFAR,FBH1,MDM2,NDFIP2,LTN1,RNF114,UBE2V2,UBB,UBR2,NEDD4L,RC3H2,LEO1,RCHY1,UBQLN1,UBA6,CDC27,RNF11,DAXX,BIRC2,GTPBP4,CBFB,DCUN1D1,PCNP,CUL4B,FANC…
GO:BP	defense response	GO:0006952	2.69229e-06	5.56988	1094	1198	129	17231	PARP14,IRF8,STAT3,STAT1,TAP1,LOC513659,LOC512486,GBP4,LOC781710,LOC507055,IRF1,DTX3L,STAT2,MX1,OAS1X,SBNO2,LOC511531,DDX58,CSF1,RNF19B,TIFA,GBP5,PARP9,CIITA,IFI16,EIF2AK2,ADAR,ZBP1,NOTCH1,CD47,KYNU,TRIM5,LCK,IFI44L,IFIT2,EXT1,LGALS8,IFIT5,PML,OAS1Z,TRIM25,PTPN2,LOC616948,SOCS1,LOC100298356,NMI,IFIH1,TRIM21,SAMHD1,LOC112441507,SEH1L,SOCS3,LOC516599,TRIM34,RIPK1,PJA2,PMAIP1,DDX3X,NAPEPLD,CGAS,BATF2…
GO:BP	organic substance biosynthetic process	GO:1901576	3.69313e-06	5.43261	4954	1198	436	17231	PARP14,IRF8,STAT3,STAT1,IRF1,DTX3L,P2RY6,STAT2,PLAGL1,SBNO2,PIK3C2B,LPIN2,CIITA,TOP1,EIF2AK2,PHLDA1,NOTCH1,BAZ1A,IRF9,KYNU,TRIM5,EXT1,ZHX2,PML,SP110,MAF,TRIM25,NAMPT,CRLF3,PTPN2,CREM,GINS2,LOC616948,SOCS1,ZNFX1,NMI,MAFF,TRIM21,SP140L,SAMHD1,TFEC,SDS,LOC516599,TRIM34,KLF10,SFMBT2,RIPK1,DDX3X,DR1,XRN2,PLEK,BATF2,PIM1,TGIF1,RERE,TNF,ARID5A,FTSJ1,NOTCH2,RUNX1,TLR4,NR2F1,IKZF2,RNASEL,DDX21,F2R,RANBP2,…
GO:BP	biosynthetic process	GO:0009058	4.93089e-06	5.30707	5018	1198	440	17231	PARP14,IRF8,STAT3,STAT1,IRF1,DTX3L,P2RY6,STAT2,PLAGL1,SBNO2,PIK3C2B,LPIN2,CIITA,TOP1,EIF2AK2,PHLDA1,NOTCH1,BAZ1A,IRF9,KYNU,TRIM5,EXT1,ZHX2,PML,SP110,MAF,TRIM25,NAMPT,CRLF3,PTPN2,CREM,GINS2,LOC616948,SOCS1,ZNFX1,NMI,MAFF,TRIM21,SP140L,SAMHD1,TFEC,SDS,LOC516599,TRIM34,KLF10,SFMBT2,RIPK1,DDX3X,DR1,XRN2,PLEK,BATF2,PIM1,TGIF1,RERE,TNF,ARID5A,FTSJ1,NOTCH2,RUNX1,TLR4,NR2F1,IKZF2,RNASEL,DDX21,F2R,RANBP2,…
GO:BP	cellular biosynthetic process	GO:0044249	5.5466e-06	5.25597	4901	1198	431	17231	PARP14,IRF8,STAT3,STAT1,IRF1,DTX3L,P2RY6,STAT2,PLAGL1,SBNO2,PIK3C2B,LPIN2,CIITA,TOP1,EIF2AK2,PHLDA1,NOTCH1,BAZ1A,IRF9,KYNU,TRIM5,EXT1,ZHX2,PML,SP110,MAF,TRIM25,NAMPT,CRLF3,PTPN2,CREM,GINS2,LOC616948,SOCS1,ZNFX1,NMI,MAFF,TRIM21,SP140L,SAMHD1,TFEC,SDS,LOC516599,TRIM34,KLF10,SFMBT2,RIPK1,DDX3X,DR1,XRN2,PLEK,BATF2,PIM1,TGIF1,RERE,TNF,ARID5A,FTSJ1,NOTCH2,RUNX1,TLR4,NR2F1,IKZF2,RNASEL,DDX21,F2R,STAT4,K…
GO:BP	antigen processing and presentation	GO:0019882	6.6234e-06	5.17892	87	1198	24	17231	TAP1,ERAP1,EXT1,LOC512672,LOC618733,ERAP2,PSMB8,TAPBPL,TAPBP,CTSS,PSME1,BOLA-NC1,BOLA-DMA,BOLA-DMB,LOC100848815,BOLA-DRA,RAB32,BOLA,BOLA-DRB3,JSP.1,BOLA-DRB2,DSB,ARL8B,MR1
GO:BP	cellular macromolecule catabolic process	GO:0044265	8.65191e-06	5.06289	882	1198	108	17231	DTX3L,RNF19B,PSMB9,UBA7,PSMB10,ZHX2,PML,TRIM25,ZC3HAV1,PSMB8,CSNK1E,RIPK1,MAN1A1,PMAIP1,XRN2,KLHL3,USP18,RNASEL,USP25,CASP8,PSMA2,GZMA,PNPT1,VPS36,CYLD,CTSS,TBX21,ISG15,UBR1,YME1L1,PSME1,USP9X,TNFRSF1B,PRPF19,PSMD10,UBE2D3,RNF122,ZYG11B,ZFP36,FMR1,MYEF2,USP15,DERL1,ELAVL1,PELI1,DIS3,MTREX,RNF19A,SSB,EZR,TNFAIP1,RBCK1,ISG20,TSG101,PSMA3,BFAR,FBH1,LTN1,HM13,UCHL5,SYNCRIP,RNF114,UBB,DCPS,NUPR1,UBR2,…
GO:BP	mRNA metabolic process	GO:0016071	9.72147e-06	5.01227	547	1198	76	17231	STAT3,ZHX2,ZC3HAV1,CMTR2,XRN2,SRSF10,PRMT9,RNASEL,AHCYL1,PNPT1,SCAF11,PRPF19,LARP7,RNGTT,SUPT4H1,ZFP36,FMR1,MYEF2,SRSF1,SRSF6,TXNL4B,ELAVL1,SRSF3,CPSF6,SSB,SRSF7,PUS1,SF3B1,PAPOLA,CSTF1,CDC40,RBM17,PRPF38B,SMNDC1,SRRM1,SYNCRIP,CCNT1,THOC2,DCPS,RBM39,RC3H2,TRA2B,PAPOLG,LEO1,DHX36,DDX5,PLRG1,NBDY,RBM26,RBM25,MTPAP,PRPF40A,MBNL2,RBM27,TRA2A,AGO3,CPSF2,SRPK1,CSTF2T,PRPF38A,CTR9,CNOT7,CELF1,PCF11,SRRM…
GO:BP	necroptotic process	GO:0070266	1.03e-05	4.98716	31	1198	14	17231	ZBP1,BIRC3,FAS,RIPK1,RNF31,TNF,CASP8,CYLD,CFLAR,PELI1,RBCK1,BIRC2,TRPM7,DNM1L
GO:BP	cellular protein metabolic process	GO:0044267	1.11632e-05	4.95221	4258	1198	381	17231	PARP14,STAT3,DTX3L,CSF1,RNF19B,LOC509283,PARP9,PRKG1,EED,TOP1,EIF2AK2,ADAR,PRKCH,TRIM5,LCK,PSMB9,UBA7,PHACTR2,PSMB10,EXT1,HERC4,PML,VCPIP1,MAPK6,TRIM25,PCMTD1,PTPN2,LOC616948,SOCS1,LOC100298356,NMI,IFIH1,TRIM21,LOC112441507,BIRC3,PSMB8,FAS,SOCS3,LOC516599,TRIM34,CSNK1E,RIPK1,MAN1A1,PJA2,PMAIP1,DDX3X,TPST2,DR1,CTDSPL,MAP3K8,MMD,RNF31,KLHL3,PIM1,PPP2R5B,TNF,MAP3K1,ARID5A,FTSJ1,TLR4,DIP2B,PTPRJ,PRMT…
GO:BP	positive regulation of RNA metabolic process	GO:0051254	1.23158e-05	4.90954	1396	1198	153	17231	IRF8,STAT3,STAT1,IRF1,DTX3L,PLAGL1,SBNO2,LPIN2,CIITA,NOTCH1,PML,MAF,TRIM25,NAMPT,CRLF3,ZC3HAV1,MAFF,TRIM21,TFEC,KLF10,RIPK1,DDX3X,DR1,PIM1,RERE,TNF,ARID5A,RUNX1,TLR4,RNASEL,F2R,STAT4,KLF6,PICALM,HIF1A,MED13,BCL3,RB1,FOS,PNPT1,CREBRF,IRF3,HDAC1,IER2,AFAP1L2,MAP2K1,TBX21,MDFIC,HDAC4,TNFRSF1B,EYA1,PRPF19,UTP15,MC1R,LARP7,IRF4,ELF2,BCL9L,VEGFA,SUPT4H1,NAA15,WDR75,ZFP36,ZNF639,WDR43,ATAD2B,PCGF5,USF1,…
GO:BP	necrotic cell death	GO:0070265	1.66527e-05	4.77852	42	1198	16	17231	ZBP1,BIRC3,FAS,RIPK1,RNF31,TNF,CASP8,IRF3,CYLD,CFLAR,PELI1,RBCK1,NUPR1,BIRC2,TRPM7,DNM1L
GO:BP	regulation of RNA metabolic process	GO:0051252	1.98277e-05	4.70273	3027	1198	285	17231	PARP14,IRF8,STAT3,STAT1,IRF1,DTX3L,STAT2,OAS1X,PLAGL1,SBNO2,LPIN2,CIITA,EIF2AK2,NOTCH1,IRF9,TRIM5,ZHX2,PML,SP110,MAF,OAS1Z,TRIM25,NAMPT,CRLF3,PTPN2,CREM,LOC616948,ZNFX1,ZC3HAV1,MAFF,TRIM21,SP140L,TFEC,LOC516599,TRIM34,KLF10,SFMBT2,RIPK1,DDX3X,DR1,BATF2,PIM1,TGIF1,RERE,TNF,ARID5A,NOTCH2,RUNX1,TLR4,NR2F1,IKZF2,RNASEL,F2R,AHCYL1,STAT4,KLF6,PICALM,TRIM38,STK3,LOC785873,HIF1A,MED13,KLF13,BCL3,RB1,FOS,…
GO:BP	mRNA processing	GO:0006397	2.15216e-05	4.66712	379	1198	58	17231	CMTR2,XRN2,SRSF10,PRMT9,RNASEL,AHCYL1,PNPT1,SCAF11,PRPF19,LARP7,RNGTT,SUPT4H1,FMR1,SRSF1,SRSF6,TXNL4B,SRSF3,CPSF6,SRSF7,SF3B1,PAPOLA,CSTF1,CDC40,RBM17,PRPF38B,SMNDC1,SRRM1,CCNT1,THOC2,DCPS,RBM39,TRA2B,PAPOLG,LEO1,DHX36,DDX5,PLRG1,RBM26,RBM25,MTPAP,PRPF40A,MBNL2,RBM27,TRA2A,CPSF2,SRPK1,CSTF2T,PRPF38A,CTR9,CELF1,PCF11,SRRM2,CWF19L2,CDC5L,FAM172A,PAXBP1,APP,DDX17
GO:BP	regulation of programmed necrotic cell death	GO:0062098	3.42209e-05	4.46571	20	1198	11	17231	ZBP1,BIRC3,RIPK1,RNF31,CASP8,CYLD,CFLAR,PELI1,RBCK1,NUPR1,BIRC2
GO:BP	cellular response to DNA damage stimulus	GO:0006974	3.42537e-05	4.46529	625	1198	82	17231	DTX3L,RBBP8,UBA7,CDKN2AIP,PML,VCPIP1,RAD1,GINS2,SAMHD1,PMAIP1,CGAS,TNF,BCL3,VAV3,TNFRSF1B,EYA1,PRPF19,MC1R,PSMD10,MCL1,BCL6,DCLRE1A,SMC5,FMR1,DCUN1D5,PPP4R2,XPA,RNF138,BCLAF1,MTREX,BCL2,PARP3,RMI1,SUSD6,ZGRF1,NBN,RAD50,FBH1,RBM17,GTF2H1,TIGAR,SLF1,UBE2V2,RIF1,NUPR1,XPC,CTC1,PMS1,SMCHD1,DEK,DDX5,MCM10,ATM,ELL3,AEN,USP3,TIMELESS,XRCC6,USP1,CD44,MMS22L,CUL4B,RAD23B,SETD7,FANCM,PARP10,CHEK1,ESCO2,GTF…
GO:BP	regulation of gene expression	GO:0010468	4.65444e-05	4.33213	3845	1198	346	17231	PARP14,IRF8,STAT3,STAT1,IRF1,DTX3L,STAT2,PLAGL1,SBNO2,DDX58,CSF1,LPIN2,GBP5,PARP9,CIITA,TOP1,EIF2AK2,ADAR,NOTCH1,CD47,IRF9,TRIM5,ZHX2,PML,SP110,MAF,TRIM25,NAMPT,CRLF3,PTPN2,CREM,LOC616948,SOCS1,ZNFX1,ZC3HAV1,NMI,MAFF,IFIH1,TRIM21,SP140L,TFEC,LOC516599,TRIM34,KLF10,SFMBT2,CSNK1E,RIPK1,DDX3X,DR1,XRN2,CGAS,GJA1,BATF2,PIM1,TGIF1,TDRD7,RERE,TNF,ARID5A,TAPBP,NOTCH2,RUNX1,TLR4,NR2F1,IKZF2,RNASEL,DDX21,F…
GO:BP	positive regulation of biosynthetic process	GO:0009891	4.85702e-05	4.31363	1531	1198	162	17231	IRF8,STAT3,STAT1,IRF1,DTX3L,P2RY6,PLAGL1,SBNO2,LPIN2,CIITA,NOTCH1,PML,MAF,TRIM25,NAMPT,CRLF3,PTPN2,MAFF,TRIM21,TFEC,KLF10,RIPK1,DDX3X,DR1,PIM1,RERE,TNF,ARID5A,RUNX1,TLR4,RNASEL,F2R,STAT4,KLF6,PICALM,HIF1A,MED13,BCL3,RB1,FOS,CREBRF,IRF3,HDAC1,IER2,AFAP1L2,MAP2K1,TBX21,MDFIC,HDAC4,EYA1,UTP15,MC1R,LARP7,CLCN3,IRF4,ELF2,BCL9L,VEGFA,SUPT4H1,NAA15,WDR75,LARP4,ZNF639,FMR1,WDR43,ATAD2B,PCGF5,USF1,MLLT6,R…
GO:BP	cellular response to cytokine stimulus	GO:0071345	5.81548e-05	4.23541	601	1198	79	17231	PARP14,IRF8,STAT3,STAT1,LOC513659,LOC512486,GBP4,LOC781710,LOC507055,IRF1,STAT2,MX1,SBNO2,LOC511531,CSF1,GBP5,PARP9,IFI16,ADAR,ZBP1,CD47,IFIT2,EXT1,PML,TRIM25,PTPN2,SOCS1,NMI,SAMHD1,FAS,SOCS3,RIPK1,IL15RA,TNF,LOC100139670,IL2RA,IFNAR2,TLR4,STAT4,HIF1A,PNPT1,IRF3,IFI47,CYLD,IL6ST,ISG15,TNFRSF1B,JARID2,STAP1,ZFP36,OTUD4,SRSF3,B3GNT2,TBK1,SRSF7,ERBIN,ARID5B,IRAK4,EGR1,TICAM2,RIF1,GCLM,KIF5B,JAK2,ACT…
GO:BP	positive regulation of cellular biosynthetic process	GO:0031328	6.261e-05	4.20336	1513	1198	160	17231	IRF8,STAT3,STAT1,IRF1,DTX3L,P2RY6,PLAGL1,SBNO2,LPIN2,CIITA,NOTCH1,PML,MAF,TRIM25,NAMPT,CRLF3,PTPN2,MAFF,TRIM21,TFEC,KLF10,RIPK1,DDX3X,DR1,PIM1,RERE,TNF,ARID5A,RUNX1,TLR4,RNASEL,F2R,STAT4,KLF6,PICALM,HIF1A,MED13,BCL3,RB1,FOS,CREBRF,IRF3,HDAC1,IER2,AFAP1L2,MAP2K1,TBX21,MDFIC,HDAC4,EYA1,UTP15,MC1R,LARP7,IRF4,ELF2,BCL9L,VEGFA,SUPT4H1,NAA15,WDR75,LARP4,ZNF639,FMR1,WDR43,ATAD2B,PCGF5,USF1,MLLT6,RRN3,NM…
GO:BP	positive regulation of RNA biosynthetic process	GO:1902680	6.35999e-05	4.19654	1302	1198	142	17231	IRF8,STAT3,STAT1,IRF1,DTX3L,PLAGL1,SBNO2,LPIN2,CIITA,NOTCH1,PML,MAF,TRIM25,NAMPT,CRLF3,MAFF,TRIM21,TFEC,KLF10,RIPK1,DDX3X,DR1,PIM1,RERE,TNF,ARID5A,RUNX1,TLR4,RNASEL,F2R,STAT4,KLF6,PICALM,HIF1A,MED13,BCL3,RB1,FOS,CREBRF,IRF3,HDAC1,IER2,AFAP1L2,MAP2K1,TBX21,MDFIC,HDAC4,EYA1,UTP15,MC1R,LARP7,IRF4,ELF2,BCL9L,VEGFA,SUPT4H1,NAA15,WDR75,ZNF639,WDR43,ATAD2B,PCGF5,USF1,MLLT6,RRN3,NMD3,BCLAF1,CITED2,CHURC1…
GO:BP	response to type I interferon	GO:0034340	7.60283e-05	4.11902	46	1198	16	17231	STAT1,STAT2,ADAR,ZBP1,PTPN2,SAMHD1,LOC100139670,IFNAR2,IRF3,ISG15,TBK1,SMPD1,IRF7,CNOT7,IFNAR1,IFITM3
GO:BP	regulation of macromolecule biosynthetic process	GO:0010556	7.75842e-05	4.11023	3172	1198	293	17231	PARP14,IRF8,STAT3,STAT1,IRF1,DTX3L,STAT2,PLAGL1,SBNO2,LPIN2,CIITA,EIF2AK2,NOTCH1,IRF9,TRIM5,ZHX2,PML,SP110,MAF,TRIM25,NAMPT,CRLF3,PTPN2,CREM,LOC616948,ZNFX1,MAFF,TRIM21,SP140L,TFEC,LOC516599,TRIM34,KLF10,SFMBT2,RIPK1,DDX3X,DR1,BATF2,PIM1,TGIF1,RERE,TNF,ARID5A,NOTCH2,RUNX1,TLR4,NR2F1,IKZF2,RNASEL,F2R,STAT4,KLF6,PICALM,TRIM38,DDX6,STK3,LOC785873,HIF1A,MED13,KLF13,BCL3,RB1,FOS,PNPT1,CREBRF,IRF3,HDAC…
GO:BP	cellular catabolic process	GO:0044248	8.07077e-05	4.09309	1626	1198	169	17231	STAT3,DTX3L,RNF19B,PIK3C2B,LPIN2,KYNU,TRIM5,CDADC1,PSMB9,UBA7,PSMB10,ERAP1,LGALS8,ZHX2,PML,TRIM25,LOC616948,ZC3HAV1,TRIM21,SAMHD1,PSMB8,SDS,BMF,LOC516599,TRIM34,CSNK1E,RIPK1,MAN1A1,PMAIP1,XRN2,DRAM2,KLHL3,TNF,GABARAPL1,USP18,RNASEL,USP25,HIF1A,CASP8,PSMA2,GZMA,PNPT1,WDR24,VPS36,CYLD,CTSS,TMEM41B,VMP1,TBX21,ISG15,UBR1,YME1L1,PSME1,USP9X,NUDT7,TNFRSF1B,PRPF19,PSMD10,ABAT,MCL1,UBE2D3,RNF122,ZYG11B,G…
GO:BP	regulation of biosynthetic process	GO:0009889	8.21557e-05	4.08536	3316	1198	304	17231	PARP14,IRF8,STAT3,STAT1,IRF1,DTX3L,P2RY6,STAT2,PLAGL1,SBNO2,LPIN2,CIITA,EIF2AK2,NOTCH1,IRF9,TRIM5,ZHX2,PML,SP110,MAF,TRIM25,NAMPT,CRLF3,PTPN2,CREM,LOC616948,ZNFX1,MAFF,TRIM21,SP140L,TFEC,LOC516599,TRIM34,KLF10,SFMBT2,RIPK1,DDX3X,DR1,PLEK,BATF2,PIM1,TGIF1,RERE,TNF,ARID5A,NOTCH2,RUNX1,TLR4,NR2F1,IKZF2,RNASEL,F2R,RANBP2,STAT4,KLF6,PICALM,TRIM38,DDX6,STK3,LOC785873,HIF1A,MED13,KLF13,BCL3,RB1,FOS,PNPT…
GO:BP	regulation of protein modification by small protein conjugation or removal	GO:1903320	8.83826e-05	4.05363	184	1198	35	17231	DTX3L,NMI,TRIM21,BIRC3,DDX3X,HIF1A,ISG15,HDAC4,PSMD10,MASTL,DCUN1D5,DERL1,OTUD4,PELI1,ZMIZ1,EGR1,NDFIP2,UBB,RCHY1,UBQLN1,DAXX,BIRC2,GTPBP4,UBA2,DCUN1D1,FANCM,PARP10,CTR9,PRMT3,ITCH,LRRK2,UBE2D1,PLAA,UBXN2A,GLMN
GO:BP	positive regulation of macromolecule biosynthetic process	GO:0010557	8.94451e-05	4.04844	1450	1198	154	17231	IRF8,STAT3,STAT1,IRF1,DTX3L,PLAGL1,SBNO2,LPIN2,CIITA,NOTCH1,PML,MAF,TRIM25,NAMPT,CRLF3,MAFF,TRIM21,TFEC,KLF10,RIPK1,DDX3X,DR1,PIM1,RERE,TNF,ARID5A,RUNX1,TLR4,RNASEL,F2R,STAT4,KLF6,PICALM,HIF1A,MED13,BCL3,RB1,FOS,CREBRF,IRF3,HDAC1,IER2,AFAP1L2,MAP2K1,TBX21,MDFIC,HDAC4,EYA1,UTP15,MC1R,LARP7,IRF4,ELF2,BCL9L,VEGFA,SUPT4H1,NAA15,WDR75,LARP4,ZNF639,FMR1,WDR43,ATAD2B,PCGF5,USF1,MLLT6,RRN3,NMD3,ELAVL1,SE…
GO:BP	negative regulation of biological process	GO:0048519	0.000101706	3.99265	4057	1198	360	17231	PARP14,IRF8,STAT3,STAT1,IRF1,DTX3L,MX1,SRGAP1,OAS1X,PLAGL1,SBNO2,CSF1,PARP9,PRKG1,CIITA,EIF2AK2,ADAR,NOTCH1,LIMA1,PHACTR2,HERC4,IFIT5,ATAD1,CDKN2AIP,ZHX2,PML,MAF,OAS1Z,TRIM25,KANK4,RAD1,CRLF3,PTGDR2,PTPN2,SOCS1,LOC100298356,ZNFX1,ZC3HAV1,NMI,TRIM21,SAMHD1,LOC112441507,TFEC,BIRC3,FAS,BMF,TAPBPL,SOCS3,KLF10,CD274,SFMBT2,CSNK1E,RIPK1,TES,DDX3X,DR1,CTDSPL,XRN2,CGAS,PLEK,GJA1,PODXL,RNF31,PIM1,TGIF1,RE…
GO:BP	regulation of cellular biosynthetic process	GO:0031326	0.00010423	3.98201	3272	1198	300	17231	PARP14,IRF8,STAT3,STAT1,IRF1,DTX3L,P2RY6,STAT2,PLAGL1,SBNO2,LPIN2,CIITA,EIF2AK2,NOTCH1,IRF9,TRIM5,ZHX2,PML,SP110,MAF,TRIM25,NAMPT,CRLF3,PTPN2,CREM,LOC616948,ZNFX1,MAFF,TRIM21,SP140L,TFEC,LOC516599,TRIM34,KLF10,SFMBT2,RIPK1,DDX3X,DR1,PLEK,BATF2,PIM1,TGIF1,RERE,TNF,ARID5A,NOTCH2,RUNX1,TLR4,NR2F1,IKZF2,RNASEL,F2R,STAT4,KLF6,PICALM,TRIM38,DDX6,STK3,LOC785873,HIF1A,MED13,KLF13,BCL3,RB1,FOS,PNPT1,CREBR…
GO:BP	positive regulation of transcription, DNA-templated	GO:0045893	0.000105619	3.97626	1301	1198	141	17231	IRF8,STAT3,STAT1,IRF1,DTX3L,PLAGL1,SBNO2,LPIN2,CIITA,NOTCH1,PML,MAF,TRIM25,NAMPT,CRLF3,MAFF,TRIM21,TFEC,KLF10,RIPK1,DDX3X,DR1,PIM1,RERE,TNF,ARID5A,RUNX1,TLR4,RNASEL,F2R,STAT4,KLF6,PICALM,HIF1A,MED13,BCL3,RB1,FOS,CREBRF,IRF3,HDAC1,IER2,AFAP1L2,MAP2K1,TBX21,MDFIC,HDAC4,EYA1,UTP15,MC1R,LARP7,IRF4,ELF2,BCL9L,VEGFA,SUPT4H1,NAA15,WDR75,ZNF639,WDR43,ATAD2B,PCGF5,USF1,MLLT6,RRN3,BCLAF1,CITED2,CHURC1,TBK1…
GO:BP	positive regulation of nucleic acid-templated transcription	GO:1903508	0.000105619	3.97626	1301	1198	141	17231	IRF8,STAT3,STAT1,IRF1,DTX3L,PLAGL1,SBNO2,LPIN2,CIITA,NOTCH1,PML,MAF,TRIM25,NAMPT,CRLF3,MAFF,TRIM21,TFEC,KLF10,RIPK1,DDX3X,DR1,PIM1,RERE,TNF,ARID5A,RUNX1,TLR4,RNASEL,F2R,STAT4,KLF6,PICALM,HIF1A,MED13,BCL3,RB1,FOS,CREBRF,IRF3,HDAC1,IER2,AFAP1L2,MAP2K1,TBX21,MDFIC,HDAC4,EYA1,UTP15,MC1R,LARP7,IRF4,ELF2,BCL9L,VEGFA,SUPT4H1,NAA15,WDR75,ZNF639,WDR43,ATAD2B,PCGF5,USF1,MLLT6,RRN3,BCLAF1,CITED2,CHURC1,TBK1…
GO:BP	macromolecule catabolic process	GO:0009057	0.000109002	3.96257	1037	1198	118	17231	DTX3L,RNF19B,PSMB9,UBA7,PSMB10,EXT1,ZHX2,PML,TRIM25,ZC3HAV1,PSMB8,CSNK1E,RIPK1,MAN1A1,PMAIP1,XRN2,KLHL3,TNF,USP18,RNASEL,USP25,CASP8,PSMA2,GZMA,PNPT1,VPS36,CYLD,CTSS,TBX21,ISG15,UBR1,YME1L1,PSME1,USP9X,TNFRSF1B,PRPF19,PSMD10,UBE2D3,RNF122,ZYG11B,ZFP36,FMR1,MYEF2,USP15,DERL1,ELAVL1,PELI1,DIS3,MTREX,RNF19A,SSB,EZR,TNFAIP1,RBCK1,ISG20,HMGCR,TSG101,PSMA3,BFAR,FBH1,LTN1,HM13,UCHL5,SYNCRIP,AZIN1,RNF114…
GO:BP	chromosome organization	GO:0051276	0.000129531	3.88763	1063	1198	120	17231	DTX3L,EED,TOP1,BAZ1A,PML,ZNFX1,SEH1L,DR1,RERE,ARID5A,RB1,HDAC1,KIF2C,HDAC4,EYA1,JARID2,BCL6,IRF4,GTF2B,SUPT4H1,DCLRE1A,NAP1L1,SMC5,FMR1,NAA50,ATXN7,RMI2,ATAD2B,PCGF5,XPA,MLLT6,USP15,KIF23,PTGES3,PARP3,NBN,RAD50,MIER1,FBH1,KIF18A,STAG2,SERTAD1,SLF1,ZNF207,ASXL1,TTF1,RIF1,UBR2,XPC,CHMP2B,CTC1,LEO1,HHEX,PRMT1,SMCHD1,DHX36,DEK,ATM,JAK2,CDC27,TBL1X,USP3,SMC4,YEATS4,DYNC1LI1,VRK1,DAXX,DLGAP5,L3MBTL3,XR…
GO:BP	cellular response to type I interferon	GO:0071357	0.000135271	3.86879	42	1198	15	17231	STAT1,STAT2,ADAR,ZBP1,PTPN2,SAMHD1,LOC100139670,IFNAR2,IRF3,ISG15,TBK1,IRF7,CNOT7,IFNAR1,IFITM3
GO:BP	regulation of necroptotic process	GO:0060544	0.000138501	3.85855	18	1198	10	17231	ZBP1,BIRC3,RIPK1,RNF31,CASP8,CYLD,CFLAR,PELI1,RBCK1,BIRC2
GO:BP	regulation of response to stress	GO:0080134	0.000165435	3.78137	854	1198	101	17231	PARP14,STAT1,DTX3L,SBNO2,PARP9,PRKG1,IFI16,EIF2AK2,ADAR,ZBP1,CD47,PML,PTPN2,SOCS1,NMI,TRIM21,SAMHD1,FAS,SOCS3,RIPK1,PJA2,PMAIP1,NAPEPLD,CGAS,RSL1D1,TNF,LOC100139670,TLR4,CHORDC1,F2R,RELL1,ANO6,CRK,USP25,STK3,HIF1A,DHX58,RB1,IFI35,PNPT1,IRF3,MAP2K1,CYLD,ISG15,TNFRSF1B,EYA1,PSMD10,MCL1,TMEM33,BCL6,GADD45B,STAP1,RAP2A,ELMOD2,ZFP36,AIDA,FMR1,PPP4R2,SRSF6,BCLAF1,SNX4,TBK1,PARP3,EZR,BFAR,FBH1,TIGAR,SLF…
GO:BP	response to interferon-gamma	GO:0034341	0.000178853	3.7475	109	1198	25	17231	PARP14,IRF8,STAT1,LOC513659,LOC512486,GBP4,LOC781710,LOC507055,IRF1,LOC511531,GBP5,PARP9,CIITA,KYNU,PTPN2,SOCS1,NMI,TRIM21,TLR4,CALCOCO2,KIF5B,ACTR3,STXBP3,IFITM3,MED1
GO:BP	immune system development	GO:0002520	0.000180462	3.74361	724	1198	89	17231	IRF8,STAT3,STAT1,IRF1,SBNO2,CSF1,EIF2AK2,ADAR,NOTCH1,LCK,EXT1,PML,PTPN2,SOCS1,SAMHD1,KLF10,RIPK1,PLEK,BATF2,GAB2,PIM1,TNF,IL2RA,NOTCH2,RUNX1,PICALM,STK3,HIF1A,PLCL2,SCIN,CASP8,BCL3,RB1,FOS,ALAS1,MAP2K1,SMAP1,TBX21,ISG15,PPP2R3C,TMOD3,JARID2,BCL6,IRF4,MYO1E,VEGFA,ZFP36,SRP54,CITED2,BCL2,PARP3,ZMIZ1,EGR1,NBN,SBDS,FNIP1,ABI1,ASXL1,RIF1,RC3H2,ETV6,CTC1,LEO1,TPD52,PRMT1,SP3,DHX36,ATM,JAK2,BOLA-DRA,UBA…
GO:BP	regulation of cellular macromolecule biosynthetic process	GO:2000112	0.000205072	3.68809	3152	1198	289	17231	PARP14,IRF8,STAT3,STAT1,IRF1,DTX3L,STAT2,PLAGL1,SBNO2,LPIN2,CIITA,EIF2AK2,NOTCH1,IRF9,TRIM5,ZHX2,PML,SP110,MAF,TRIM25,NAMPT,CRLF3,PTPN2,CREM,LOC616948,ZNFX1,MAFF,TRIM21,SP140L,TFEC,LOC516599,TRIM34,KLF10,SFMBT2,RIPK1,DDX3X,DR1,BATF2,PIM1,TGIF1,RERE,TNF,ARID5A,NOTCH2,RUNX1,TLR4,NR2F1,IKZF2,RNASEL,F2R,STAT4,KLF6,PICALM,TRIM38,DDX6,STK3,LOC785873,HIF1A,MED13,KLF13,BCL3,RB1,FOS,PNPT1,CREBRF,IRF3,HDAC…
GO:BP	antigen processing and presentation of endogenous peptide antigen	GO:0002483	0.000274131	3.56204	19	1198	10	17231	TAP1,ERAP1,LOC512672,LOC618733,ERAP2,TAPBP,BOLA-NC1,BOLA-DRA,BOLA,JSP.1
GO:BP	interferon-alpha production	GO:0032607	0.000274131	3.56204	19	1198	10	17231	STAT1,NMI,IFIH1,DDX3X,TLR4,IRF3,TBK1,DHX36,IRF7,HSPD1
GO:BP	regulation of interferon-alpha production	GO:0032647	0.000274131	3.56204	19	1198	10	17231	STAT1,NMI,IFIH1,DDX3X,TLR4,IRF3,TBK1,DHX36,IRF7,HSPD1
GO:BP	macromolecule biosynthetic process	GO:0009059	0.000310646	3.50773	4151	1198	364	17231	PARP14,IRF8,STAT3,STAT1,IRF1,DTX3L,STAT2,PLAGL1,SBNO2,LPIN2,CIITA,TOP1,EIF2AK2,PHLDA1,NOTCH1,BAZ1A,IRF9,TRIM5,EXT1,ZHX2,PML,SP110,MAF,TRIM25,NAMPT,CRLF3,PTPN2,CREM,GINS2,LOC616948,ZNFX1,NMI,MAFF,TRIM21,SP140L,SAMHD1,TFEC,LOC516599,TRIM34,KLF10,SFMBT2,RIPK1,DDX3X,DR1,XRN2,BATF2,PIM1,TGIF1,RERE,TNF,ARID5A,FTSJ1,NOTCH2,RUNX1,TLR4,NR2F1,IKZF2,RNASEL,DDX21,F2R,STAT4,KLF6,PICALM,TRIM38,DDX6,STK3,LOC785…
GO:BP	cellular protein catabolic process	GO:0044257	0.000324794	3.48839	647	1198	81	17231	DTX3L,RNF19B,PSMB9,UBA7,PSMB10,PML,TRIM25,PSMB8,CSNK1E,RIPK1,MAN1A1,PMAIP1,KLHL3,USP18,USP25,CASP8,PSMA2,GZMA,VPS36,CYLD,CTSS,TBX21,ISG15,UBR1,YME1L1,PSME1,USP9X,PRPF19,PSMD10,UBE2D3,RNF122,ZYG11B,USP15,DERL1,PELI1,RNF19A,EZR,TNFAIP1,RBCK1,TSG101,PSMA3,BFAR,LTN1,HM13,UCHL5,RNF114,UBB,NUPR1,UBR2,LAMP2,XPO1,NEDD4L,RC3H2,RCHY1,UBQLN1,UBA6,USP3,NEMF,RNF11,PSMA4,USP1,SOCS4,PCNP,WDR91,USP33,CUL4B,RAD23…
GO:BP	positive regulation of response to stimulus	GO:0048584	0.000333936	3.47634	1516	1198	157	17231	PARP14,STAT3,DTX3L,P2RY6,CSF1,TIFA,PARP9,IFI16,EIF2AK2,ZBP1,NOTCH1,CD47,CD180,TRIM5,LCK,IFIT5,GKAP1,CDKN2AIP,PML,TRIM25,LOC618733,CRLF3,PTGDR2,PTPN2,LOC616948,SOCS1,NMI,IFIH1,TRIM21,SEH1L,FAS,LOC516599,TRIM34,CSNK1E,RIPK1,PJA2,PMAIP1,DDX3X,NAPEPLD,CGAS,RNF31,TNF,ARID5A,NOTCH2,TLR4,PTPRJ,DDX21,F2R,RELL1,ANO6,LOC107131209,RTN4,TRIM38,STK3,HIF1A,DHX58,PLCL2,CASP8,IFI35,C4A,WDR24,IRF3,RASGEF1A,AFAP1L…
GO:BP	cellular macromolecule biosynthetic process	GO:0034645	0.000449544	3.34723	4125	1198	361	17231	PARP14,IRF8,STAT3,STAT1,IRF1,DTX3L,STAT2,PLAGL1,SBNO2,LPIN2,CIITA,TOP1,EIF2AK2,PHLDA1,NOTCH1,BAZ1A,IRF9,TRIM5,EXT1,ZHX2,PML,SP110,MAF,TRIM25,NAMPT,CRLF3,PTPN2,CREM,GINS2,LOC616948,ZNFX1,NMI,MAFF,TRIM21,SP140L,SAMHD1,TFEC,LOC516599,TRIM34,KLF10,SFMBT2,RIPK1,DDX3X,DR1,XRN2,BATF2,PIM1,TGIF1,RERE,TNF,ARID5A,FTSJ1,NOTCH2,RUNX1,TLR4,NR2F1,IKZF2,RNASEL,DDX21,F2R,STAT4,KLF6,PICALM,TRIM38,DDX6,STK3,LOC785…
GO:BP	nucleobase-containing compound biosynthetic process	GO:0034654	0.000514499	3.28862	3313	1198	299	17231	PARP14,IRF8,STAT3,STAT1,IRF1,DTX3L,STAT2,PLAGL1,SBNO2,LPIN2,CIITA,EIF2AK2,NOTCH1,IRF9,KYNU,TRIM5,ZHX2,PML,SP110,MAF,TRIM25,NAMPT,CRLF3,PTPN2,CREM,LOC616948,ZNFX1,NMI,MAFF,TRIM21,SP140L,SAMHD1,TFEC,LOC516599,TRIM34,KLF10,SFMBT2,RIPK1,DDX3X,DR1,XRN2,BATF2,PIM1,TGIF1,RERE,TNF,ARID5A,NOTCH2,RUNX1,TLR4,NR2F1,IKZF2,RNASEL,DDX21,F2R,STAT4,KLF6,PICALM,TRIM38,STK3,LOC785873,HIF1A,MED13,KLF13,BCL3,RB1,FOS,…
GO:BP	RNA biosynthetic process	GO:0032774	0.00054262	3.2655	2952	1198	271	17231	PARP14,IRF8,STAT3,STAT1,IRF1,DTX3L,STAT2,PLAGL1,SBNO2,LPIN2,CIITA,EIF2AK2,NOTCH1,IRF9,TRIM5,ZHX2,PML,SP110,MAF,TRIM25,NAMPT,CRLF3,PTPN2,CREM,LOC616948,ZNFX1,NMI,MAFF,TRIM21,SP140L,TFEC,LOC516599,TRIM34,KLF10,SFMBT2,RIPK1,DDX3X,DR1,XRN2,BATF2,PIM1,TGIF1,RERE,TNF,ARID5A,NOTCH2,RUNX1,TLR4,NR2F1,IKZF2,RNASEL,DDX21,F2R,STAT4,KLF6,PICALM,TRIM38,STK3,LOC785873,HIF1A,MED13,KLF13,BCL3,RB1,FOS,CREBRF,IRF3,…
GO:BP	organonitrogen compound metabolic process	GO:1901564	0.000553823	3.25663	5664	1198	474	17231	PARP14,STAT3,DTX3L,LOC788334,LAP3,CSF1,RNF19B,LOC509283,PARP9,PRKG1,EED,TOP1,EIF2AK2,ADAR,CASP7,APOL3,PHLDA1,PRKCH,LOC518495,KYNU,TRIM5,CDADC1,LCK,PSMB9,UBA7,PHACTR2,PSMB10,ERAP1,EXT1,HERC4,PML,VCPIP1,MAPK6,TRIM25,NAMPT,PCMTD1,MTHFD2,ERAP2,PTPN2,LOC616948,SOCS1,LOC100298356,NMI,IFIH1,TRIM21,SAMHD1,LOC112441507,BIRC3,PSMB8,FAS,CASP4,SDS,LOC786352,SOCS3,LOC516599,TRIM34,CSNK1E,RIPK1,MAN1A1,PJA2,PMA…
GO:BP	aromatic compound biosynthetic process	GO:0019438	0.000556835	3.25427	3381	1198	304	17231	PARP14,IRF8,STAT3,STAT1,IRF1,DTX3L,STAT2,PLAGL1,SBNO2,LPIN2,CIITA,EIF2AK2,NOTCH1,IRF9,KYNU,TRIM5,ZHX2,PML,SP110,MAF,TRIM25,NAMPT,CRLF3,PTPN2,CREM,LOC616948,ZNFX1,NMI,MAFF,TRIM21,SP140L,SAMHD1,TFEC,LOC516599,TRIM34,KLF10,SFMBT2,RIPK1,DDX3X,DR1,XRN2,BATF2,PIM1,TGIF1,RERE,TNF,ARID5A,NOTCH2,RUNX1,TLR4,NR2F1,IKZF2,RNASEL,DDX21,F2R,STAT4,KLF6,PICALM,TRIM38,STK3,LOC785873,HIF1A,MED13,KLF13,BCL3,RB1,FOS,…
GO:BP	proteolysis involved in cellular protein catabolic process	GO:0051603	0.000618141	3.20891	614	1198	77	17231	DTX3L,RNF19B,PSMB9,UBA7,PSMB10,PML,TRIM25,PSMB8,CSNK1E,MAN1A1,PMAIP1,KLHL3,USP18,USP25,CASP8,PSMA2,GZMA,VPS36,CYLD,CTSS,TBX21,ISG15,UBR1,YME1L1,PSME1,USP9X,PRPF19,PSMD10,UBE2D3,RNF122,ZYG11B,USP15,DERL1,PELI1,RNF19A,TNFAIP1,RBCK1,TSG101,PSMA3,BFAR,LTN1,HM13,UCHL5,RNF114,UBB,NUPR1,UBR2,XPO1,NEDD4L,RC3H2,RCHY1,UBQLN1,UBA6,USP3,NEMF,RNF11,PSMA4,USP1,SOCS4,PCNP,USP33,CUL4B,RAD23B,USP37,DET1,RLIM,ITCH…
GO:BP	DNA metabolic process	GO:0006259	0.000679406	3.16787	691	1198	84	17231	DTX3L,RBBP8,TOP1,CDADC1,PML,VCPIP1,RAD1,GINS2,SAMHD1,XRN2,CGAS,DDX21,GZMA,TBX21,UHRF2,USP9X,EYA1,PRPF19,MC1R,BCL6,DCLRE1A,SMC5,PPP4R2,XPA,RNF138,OTUD4,ORC4,PTGES3,PARP3,RMI1,ISG20,ZGRF1,NBN,PIK3CA,RAD50,FBH1,RBM17,GTF2H1,TIGAR,NOC3L,METTL4,SLF1,UBE2V2,RIF1,UBR2,XPC,CTC1,PMS1,SMCHD1,DHX36,DEK,MCM10,ATM,USP3,TIMELESS,XRCC6,USP1,HELLS,MMS22L,APOBEC3H,CUL4B,RAD23B,RLF,FANCM,PARP10,CHEK1,ESCO2,CCT6A,G…
GO:BP	heterocycle biosynthetic process	GO:0018130	0.000679795	3.16762	3375	1198	303	17231	PARP14,IRF8,STAT3,STAT1,IRF1,DTX3L,STAT2,PLAGL1,SBNO2,LPIN2,CIITA,EIF2AK2,NOTCH1,IRF9,KYNU,TRIM5,ZHX2,PML,SP110,MAF,TRIM25,NAMPT,CRLF3,PTPN2,CREM,LOC616948,ZNFX1,NMI,MAFF,TRIM21,SP140L,SAMHD1,TFEC,LOC516599,TRIM34,KLF10,SFMBT2,RIPK1,DDX3X,DR1,XRN2,BATF2,PIM1,TGIF1,RERE,TNF,ARID5A,NOTCH2,RUNX1,TLR4,NR2F1,IKZF2,RNASEL,DDX21,F2R,STAT4,KLF6,PICALM,TRIM38,STK3,LOC785873,HIF1A,MED13,KLF13,BCL3,RB1,FOS,…
GO:BP	organelle organization	GO:0006996	0.000686445	3.16339	3284	1198	296	17231	DTX3L,HPS4,PIK3C2B,EED,TOP1,STRIP1,BAZ1A,LIMA1,MYPN,PHACTR2,EXT1,PML,VCPIP1,KANK4,RAD1,ZNFX1,SEH1L,PMAIP1,DDX3X,DR1,PLEK,SPATA6,GJA1,RERE,TNF,ARID5A,NOTCH2,CHORDC1,CRK,RTN4,PICALM,DDX6,HIF1A,VPS54,SCIN,RB1,WASHC4,PNPT1,HDAC1,KIF2C,CYLD,TMEM41B,VMP1,YME1L1,MIA3,RHOU,HDAC4,NUP107,TMOD3,EYA1,RAB14,PSMD10,ARF6,CLCN3,TMEM33,JARID2,BCL6,MASTL,SDAD1,STAP1,RAP2A,IRF4,MYO1E,MX2,GTF2B,SUPT4H1,LARP4,CAPZA2,…
GO:BP	type I interferon signaling pathway	GO:0060337	0.000707969	3.14999	41	1198	14	17231	STAT1,STAT2,ADAR,ZBP1,PTPN2,SAMHD1,IFNAR2,IRF3,ISG15,TBK1,IRF7,CNOT7,IFNAR1,IFITM3
GO:BP	organic cyclic compound biosynthetic process	GO:1901362	0.000726958	3.13849	3469	1198	310	17231	PARP14,IRF8,STAT3,STAT1,IRF1,DTX3L,STAT2,PLAGL1,SBNO2,LPIN2,CIITA,EIF2AK2,NOTCH1,IRF9,KYNU,TRIM5,ZHX2,PML,SP110,MAF,TRIM25,NAMPT,CRLF3,PTPN2,CREM,LOC616948,ZNFX1,NMI,MAFF,TRIM21,SP140L,SAMHD1,TFEC,LOC516599,TRIM34,KLF10,SFMBT2,RIPK1,DDX3X,DR1,XRN2,BATF2,PIM1,TGIF1,RERE,TNF,ARID5A,NOTCH2,RUNX1,TLR4,NR2F1,IKZF2,RNASEL,DDX21,F2R,STAT4,KLF6,PICALM,TRIM38,STK3,LOC785873,HIF1A,MED13,KLF13,BCL3,RB1,FOS,…
GO:BP	hemopoiesis	GO:0030097	0.000729205	3.13715	638	1198	79	17231	IRF8,STAT3,STAT1,IRF1,SBNO2,CSF1,EIF2AK2,ADAR,NOTCH1,LCK,EXT1,PML,PTPN2,SOCS1,KLF10,RIPK1,PLEK,BATF2,GAB2,PIM1,TNF,NOTCH2,RUNX1,PICALM,STK3,HIF1A,PLCL2,SCIN,CASP8,BCL3,RB1,FOS,ALAS1,SMAP1,TBX21,ISG15,PPP2R3C,TMOD3,BCL6,IRF4,MYO1E,VEGFA,ZFP36,SRP54,CITED2,BCL2,ZMIZ1,EGR1,SBDS,FNIP1,ABI1,ASXL1,RC3H2,ETV6,CTC1,LEO1,TPD52,PRMT1,SP3,DHX36,ATM,JAK2,BOLA-DRA,UBA5,JUNB,L3MBTL3,CBFB,IREB2,ESCO2,CTR9,RC3H1…
GO:BP	cellular component organization or biogenesis	GO:0071840	0.000775789	3.11026	5185	1198	438	17231	DTX3L,LTV1,HPS4,TIFA,PIK3C2B,GBP5,EED,TOP1,EIF2AK2,ADAR,STRIP1,FERMT3,NOTCH1,BAZ1A,LIMA1,MYPN,PHACTR2,EXT1,EMP1,ATAD1,CDKN2AIP,PML,VCPIP1,MAPK6,KANK4,RAD1,CRLF3,ZNFX1,CD53,SAMHD1,SEH1L,TAPBPL,RIPK1,PMAIP1,DDX3X,DR1,PLEK,SPATA6,GJA1,PODXL,RSL1D1,RERE,ATP9A,TNF,ARID5A,TAPBP,NOTCH2,TLR4,DIP2B,PTPRJ,CHORDC1,BRIX1,F2R,ANO6,AHCYL1,CRK,RTN4,PICALM,DDX6,MITD1,HIF1A,PLEKHO1,VPS54,STX11,SCIN,BCL3,NOL9,RB1,…
GO:BP	positive regulation of signal transduction	GO:0009967	0.000859639	3.06568	1101	1198	120	17231	PARP14,STAT3,P2RY6,CSF1,TIFA,PARP9,EIF2AK2,ZBP1,NOTCH1,CD180,TRIM5,LCK,IFIT5,GKAP1,CDKN2AIP,PML,TRIM25,CRLF3,PTGDR2,PTPN2,LOC616948,SOCS1,NMI,TRIM21,SEH1L,FAS,LOC516599,TRIM34,CSNK1E,RIPK1,PJA2,PMAIP1,DDX3X,CGAS,RNF31,TNF,NOTCH2,TLR4,PTPRJ,DDX21,F2R,RELL1,RTN4,TRIM38,STK3,HIF1A,DHX58,CASP8,IFI35,WDR24,IRF3,RASGEF1A,AFAP1L2,MAP2K1,CYLD,IL6ST,MDFIC,MC1R,MCL1,TMEM33,GADD45B,STAP1,CFLAR,VEGFA,OSBPL8,…
GO:BP	transcription, DNA-templated	GO:0006351	0.00086882	3.06107	2942	1198	269	17231	PARP14,IRF8,STAT3,STAT1,IRF1,DTX3L,STAT2,PLAGL1,SBNO2,LPIN2,CIITA,EIF2AK2,NOTCH1,IRF9,TRIM5,ZHX2,PML,SP110,MAF,TRIM25,NAMPT,CRLF3,PTPN2,CREM,LOC616948,ZNFX1,NMI,MAFF,TRIM21,SP140L,TFEC,LOC516599,TRIM34,KLF10,SFMBT2,RIPK1,DDX3X,DR1,XRN2,BATF2,PIM1,TGIF1,RERE,TNF,ARID5A,NOTCH2,RUNX1,TLR4,NR2F1,IKZF2,RNASEL,DDX21,F2R,STAT4,KLF6,PICALM,TRIM38,STK3,LOC785873,HIF1A,MED13,KLF13,BCL3,RB1,FOS,CREBRF,IRF3,…
GO:BP	intracellular transport	GO:0046907	0.000875993	3.0575	1113	1198	121	17231	STAT3,TAP1,DTX3L,HPS4,PML,SNX16,MAN1A1,CMTM6,ATP9A,AHCYL1,RANBP2,PICALM,HIF1A,VPS54,STX11,WASHC4,VPS36,TXNIP,MIA3,NUP107,RAB14,ARF6,SDAD1,MYO1E,MX2,RIC1,HEATR5B,NUP160,TMED2,LYST,NMD3,SEC24B,DERL1,ELAVL1,SRP54,SRSF3,REPS2,SNX4,STAM2,AP1AR,CPSF6,SSB,EZR,ABCE1,COPB1,YWHAG,ERBIN,TRAM1,IPO7,ARL5B,ZFYVE16,SNX6,TBC1D23,HM13,NUS1,VPS26A,ZFAND1,THOC2,UBB,TFG,LAMP2,XPO1,KIF5B,FAM91A1,GCC2,CSE1L,HHEX,TMEM3…
GO:BP	antigen processing and presentation of peptide antigen	GO:0048002	0.000884554	3.05328	36	1198	13	17231	TAP1,ERAP1,LOC512672,LOC618733,ERAP2,TAPBPL,TAPBP,CTSS,BOLA-NC1,BOLA-DMA,BOLA-DRA,BOLA,JSP.1
GO:BP	nucleic acid-templated transcription	GO:0097659	0.000894885	3.04823	2943	1198	269	17231	PARP14,IRF8,STAT3,STAT1,IRF1,DTX3L,STAT2,PLAGL1,SBNO2,LPIN2,CIITA,EIF2AK2,NOTCH1,IRF9,TRIM5,ZHX2,PML,SP110,MAF,TRIM25,NAMPT,CRLF3,PTPN2,CREM,LOC616948,ZNFX1,NMI,MAFF,TRIM21,SP140L,TFEC,LOC516599,TRIM34,KLF10,SFMBT2,RIPK1,DDX3X,DR1,XRN2,BATF2,PIM1,TGIF1,RERE,TNF,ARID5A,NOTCH2,RUNX1,TLR4,NR2F1,IKZF2,RNASEL,DDX21,F2R,STAT4,KLF6,PICALM,TRIM38,STK3,LOC785873,HIF1A,MED13,KLF13,BCL3,RB1,FOS,CREBRF,IRF3,…
GO:BP	hematopoietic or lymphoid organ development	GO:0048534	0.000910597	3.04067	674	1198	82	17231	IRF8,STAT3,STAT1,IRF1,SBNO2,CSF1,EIF2AK2,ADAR,NOTCH1,LCK,EXT1,PML,PTPN2,SOCS1,KLF10,RIPK1,PLEK,BATF2,GAB2,PIM1,TNF,NOTCH2,RUNX1,PICALM,STK3,HIF1A,PLCL2,SCIN,CASP8,BCL3,RB1,FOS,ALAS1,MAP2K1,SMAP1,TBX21,ISG15,PPP2R3C,TMOD3,JARID2,BCL6,IRF4,MYO1E,VEGFA,ZFP36,SRP54,CITED2,BCL2,ZMIZ1,EGR1,SBDS,FNIP1,ABI1,ASXL1,RC3H2,ETV6,CTC1,LEO1,TPD52,PRMT1,SP3,DHX36,ATM,JAK2,BOLA-DRA,UBA5,JUNB,L3MBTL3,CBFB,LTA,IREB…
GO:BP	negative regulation of nitrogen compound metabolic process	GO:0051172	0.000929521	3.03174	1858	1198	183	17231	PARP14,IRF8,STAT3,IRF1,DTX3L,PLAGL1,SBNO2,CIITA,EIF2AK2,ADAR,NOTCH1,PHACTR2,ZHX2,PML,MAF,PTPN2,SOCS1,LOC100298356,ZNFX1,TRIM21,LOC112441507,TFEC,BIRC3,SOCS3,KLF10,SFMBT2,DDX3X,DR1,CTDSPL,CGAS,TGIF1,RERE,TNF,ARID5A,NOTCH2,NR2F1,PTPRJ,CHORDC1,LOC107131209,RTN4,USP25,PICALM,DDX6,BCL3,RB1,GZMA,C4A,PNPT1,IRF3,HDAC1,TBX21,ISG15,TXNIP,MDFIC,PPP1R16B,HDAC4,DEPDC1,SAMSN1,PSMD10,LARP7,JARID2,BCL6,MASTL,GAD…
GO:BP	regulation of necrotic cell death	GO:0010939	0.00106625	2.97214	26	1198	11	17231	ZBP1,BIRC3,RIPK1,RNF31,CASP8,CYLD,CFLAR,PELI1,RBCK1,NUPR1,BIRC2
GO:BP	positive regulation of interferon-alpha production	GO:0032727	0.00112025	2.95069	17	1198	9	17231	STAT1,IFIH1,DDX3X,TLR4,IRF3,TBK1,DHX36,IRF7,HSPD1
GO:BP	positive regulation of intracellular signal transduction	GO:1902533	0.00124436	2.90505	701	1198	84	17231	P2RY6,CSF1,TIFA,EIF2AK2,NOTCH1,TRIM5,LCK,IFIT5,TRIM25,PTPN2,LOC616948,NMI,TRIM21,SEH1L,LOC516599,TRIM34,RIPK1,PJA2,PMAIP1,DDX3X,CGAS,RNF31,TNF,NOTCH2,TLR4,PTPRJ,DDX21,F2R,RELL1,RTN4,TRIM38,STK3,DHX58,CASP8,IFI35,WDR24,RASGEF1A,MAP2K1,MDFIC,MC1R,MCL1,GADD45B,CFLAR,VEGFA,OSBPL8,USP15,TNFSF10,PELI1,MAP4K5,BCLAF1,TBK1,RBCK1,IRAK4,PIK3CA,FBH1,NTRK3,FNIP1,UBB,SLC38A9,NUPR1,KRAS,RC3H2,DHX36,DDX5,DYNC1LI…
GO:BP	protein catabolic process	GO:0030163	0.00130051	2.88589	768	1198	90	17231	DTX3L,RNF19B,PSMB9,UBA7,PSMB10,EXT1,PML,TRIM25,PSMB8,CSNK1E,RIPK1,MAN1A1,PMAIP1,KLHL3,TNF,USP18,USP25,CASP8,PSMA2,GZMA,VPS36,CYLD,CTSS,TBX21,ISG15,UBR1,YME1L1,PSME1,USP9X,TNFRSF1B,PRPF19,PSMD10,UBE2D3,RNF122,ZYG11B,USP15,DERL1,PELI1,RNF19A,EZR,TNFAIP1,RBCK1,HMGCR,TSG101,PSMA3,BFAR,LTN1,HM13,UCHL5,AZIN1,RNF114,UBB,NUPR1,UBR2,LAMP2,XPO1,NEDD4L,RC3H2,RCHY1,UBQLN1,UBA6,ATM,USP3,NEMF,RNF11,PSMA4,USP1,…
GO:BP	myeloid cell differentiation	GO:0030099	0.00141382	2.84961	279	1198	43	17231	IRF8,STAT3,STAT1,SBNO2,CSF1,ADAR,PML,PTPN2,KLF10,RIPK1,BATF2,GAB2,TNF,NOTCH2,HIF1A,SCIN,CASP8,RB1,FOS,ALAS1,SMAP1,ISG15,TMOD3,BCL6,IRF4,VEGFA,ZFP36,SRP54,CITED2,ABI1,LEO1,PRMT1,SP3,JAK2,UBA5,JUNB,L3MBTL3,CBFB,IREB2,CTR9,MED1,LRRK1,APP
GO:BP	positive regulation of I-kappaB kinase/NF-kappaB signaling	GO:0043123	0.00149401	2.82565	121	1198	25	17231	TIFA,TRIM5,IFIT5,TRIM25,LOC616948,TRIM21,LOC516599,TRIM34,RIPK1,RNF31,TNF,TLR4,DDX21,F2R,TRIM38,CASP8,CFLAR,TNFSF10,PELI1,TBK1,RBCK1,IRAK4,DHX36,MTDH,TMEM106A
GO:BP	macromolecule localization	GO:0033036	0.00152574	2.81652	2108	1198	202	17231	STAT3,LOC781710,DTX3L,LOC788334,HPS4,GBP5,APOL3,LOC518495,LIMA1,TRIM5,LRP10,PML,VCPIP1,TRIM25,PTPN2,LOC616948,TRIM21,SNX16,SEH1L,LOC786352,LOC516599,TRIM34,CSNK1E,MAN1A1,CMTM6,DDX3X,MMD,PLEK,LAMP3,GJA1,RSL1D1,ATP9A,TNF,LOC100139670,TLR4,GDI2,MORC3,F2R,ANO6,AHCYL1,RANBP2,RTN4,PICALM,HIF1A,VPS54,STX11,SCIN,RB1,PNPT1,MYOM1,VPS36,GRAMD1C,VMP1,TXNIP,MIA3,PLSCR2,NUP107,PRPF19,RAB14,PSMD10,LARP7,ARF6,AC…
GO:BP	intracellular signal transduction	GO:0035556	0.00153293	2.81448	1971	1198	191	17231	STAT1,P2RY6,CSF1,TIFA,PIK3C2B,EIF2AK2,PRKCH,NRG2,NOTCH1,TRIM5,LCK,RALGPS2,IFIT5,TBKBP1,PML,MAPK6,TRIM25,ARHGAP31,RAD1,PTGDR2,PTPN2,LOC616948,SOCS1,NMI,IFIH1,TRIM21,SEH1L,FAS,SOCS3,LOC516599,TRIM34,RIPK1,PJA2,PMAIP1,DDX3X,MAP3K8,CGAS,PLEK,INPP5A,CISH,RNF31,TNF,NOTCH2,TLR4,GDI2,PTPRJ,DDX21,F2R,RELL1,RAPGEF5,CRK,RTN4,TRIM38,STK3,HIF1A,DHX58,SPATA13,PLCL2,CASP8,BCL3,RB1,IFI35,WDR24,MYOM1,HDAC1,RASGEF…
GO:BP	DNA repair	GO:0006281	0.00160676	2.79405	388	1198	54	17231	DTX3L,RBBP8,PML,VCPIP1,RAD1,GINS2,SAMHD1,CGAS,EYA1,PRPF19,MC1R,DCLRE1A,SMC5,PPP4R2,XPA,RNF138,PARP3,RMI1,ZGRF1,NBN,RAD50,FBH1,RBM17,GTF2H1,TIGAR,SLF1,UBE2V2,RIF1,XPC,PMS1,SMCHD1,DEK,ATM,USP3,TIMELESS,XRCC6,USP1,MMS22L,CUL4B,RAD23B,FANCM,PARP10,CHEK1,ESCO2,GTF2H3,FANCL,TDG,RAD51C,SMC6,NSMCE2,ABRAXAS1,SLF2,PDS5B,ACTR8
GO:BP	cellular localization	GO:0051641	0.00182813	2.73799	2151	1198	205	17231	STAT3,TAP1,LOC781710,DTX3L,HPS4,GBP5,RAB27A,ATAD1,PML,VCPIP1,SNX16,SEH1L,CSNK1E,MAN1A1,CMTM6,DDX3X,PLEK,LAMP3,GJA1,ATP9A,TNF,MORC3,F2R,AHCYL1,RANBP2,RTN4,PICALM,HIF1A,VPS54,STX11,SCIN,RB1,WASHC4,KIF2C,VPS36,VMP1,TXNIP,MIA3,NUP107,PRPF19,RAB14,LARP7,TRPV2,ARF6,CLCN3,SDAD1,RAP2A,MYO1E,MX2,RIC1,IBTK,ZFP36,OSBPL8,SMC5,HEATR5B,NUP160,TMED2,XPA,LYST,NMD3,SEC24B,DERL1,ELAVL1,SRP54,SRSF3,REPS2,RPF2,RAB12…
GO:BP	regulation of cellular response to stress	GO:0080135	0.00194901	2.71019	462	1198	61	17231	DTX3L,EIF2AK2,PML,PTPN2,FAS,RIPK1,PJA2,PMAIP1,CGAS,RSL1D1,TNF,TLR4,CHORDC1,RELL1,USP25,STK3,HIF1A,PNPT1,MAP2K1,CYLD,EYA1,PSMD10,MCL1,TMEM33,BCL6,GADD45B,RAP2A,AIDA,FMR1,PPP4R2,BCLAF1,PARP3,EZR,BFAR,FBH1,TIGAR,SLF1,RIF1,NUPR1,SMCHD1,DEK,DDX5,UBQLN1,ELL3,USP1,PPP1R15B,NCOA7,CD44,CHEK1,DHFR,ITCH,LRIG2,LRRK2,ATF6,NCK1,STK26,TAOK1,ATAD5,ABRAXAS1,APP,SLF2
GO:BP	catabolic process	GO:0009056	0.00198845	2.70149	1904	1198	185	17231	STAT3,DTX3L,RNF19B,PIK3C2B,LPIN2,KYNU,TRIM5,CDADC1,PSMB9,UBA7,PSMB10,ERAP1,EXT1,LGALS8,ZHX2,PML,TRIM25,LOC616948,ZC3HAV1,TRIM21,SAMHD1,PSMB8,SDS,BMF,LOC516599,TRIM34,CSNK1E,RIPK1,MAN1A1,PMAIP1,XRN2,DRAM2,INPP5A,KLHL3,TNF,GABARAPL1,USP18,RNASEL,USP25,HIF1A,PLCL2,BPNT1,CASP8,PSMA2,GZMA,PNPT1,WDR24,VPS36,CYLD,CTSS,TMEM41B,VMP1,TBX21,ISG15,UBR1,YME1L1,PSME1,USP9X,HDAC4,NUDT7,TNFRSF1B,PRPF19,PSMD10,AB…
GO:BP	response to external stimulus	GO:0009605	0.00199931	2.69912	1867	1198	182	17231	PARP14,IRF8,STAT1,LOC513659,LOC512486,GBP4,LOC781710,LOC507055,IRF1,DTX3L,STAT2,MX1,OAS1X,SBNO2,LOC511531,DDX58,CSF1,RNF19B,TIFA,PIK3C2B,GBP5,PARP9,PRKG1,CIITA,IFI16,EIF2AK2,ADAR,ZBP1,NOTCH1,CD47,CD180,KYNU,TRIM5,LCK,IFI44L,IFIT2,EXT1,LGALS8,IFIT5,PML,OAS1Z,TRIM25,LOC618733,PTGDR2,PTPN2,LOC616948,SOCS1,LOC100298356,ZC3HAV1,NMI,IFIH1,TRIM21,SAMHD1,LOC112441507,SEH1L,FAS,IFI44,SOCS3,LOC516599,TRIM3…
GO:BP	homeostasis of number of cells	GO:0048872	0.0021626	2.66502	218	1198	36	17231	STAT3,STAT1,CSF1,ADAR,NOTCH1,EXT1,PTPN2,FAS,NAPEPLD,F2R,HIF1A,VPS54,RB1,ALAS1,SMAP1,ISG15,PPP2R3C,TMOD3,BCL6,ZFP36,RRN3,CITED2,BCL2,LIPA,ASXL1,KRAS,RC3H2,PRMT1,SP3,JAK2,UBA5,L3MBTL3,IREB2,RC3H1,PPP3CB,MED1
GO:BP	positive regulation of cell communication	GO:0010647	0.0021712	2.6633	1215	1198	128	17231	PARP14,STAT3,P2RY6,CSF1,TIFA,PARP9,EIF2AK2,ZBP1,NOTCH1,CD180,TRIM5,LCK,IFIT5,GKAP1,CDKN2AIP,PML,TRIM25,CRLF3,PTGDR2,PTPN2,LOC616948,SOCS1,NMI,TRIM21,SEH1L,FAS,LOC516599,TRIM34,CSNK1E,RIPK1,PJA2,PMAIP1,DDX3X,CGAS,RNF31,TNF,NOTCH2,TLR4,PTPRJ,DDX21,F2R,RELL1,RTN4,TRIM38,STK3,HIF1A,DHX58,CASP8,IFI35,WDR24,IRF3,RASGEF1A,AFAP1L2,MAP2K1,CYLD,IL6ST,MDFIC,MC1R,MCL1,TMEM33,GADD45B,STAP1,CFLAR,VEGFA,OSBPL8,…
GO:BP	cellular response to interferon-gamma	GO:0071346	0.00223701	2.65033	85	1198	20	17231	PARP14,IRF8,STAT1,LOC513659,LOC512486,GBP4,LOC781710,LOC507055,IRF1,LOC511531,GBP5,PARP9,PTPN2,SOCS1,NMI,TLR4,KIF5B,ACTR3,STXBP3,MED1
GO:BP	negative regulation of programmed necrotic cell death	GO:0062099	0.00228659	2.64081	14	1198	8	17231	BIRC3,RIPK1,RNF31,CASP8,PELI1,RBCK1,NUPR1,BIRC2
GO:BP	nuclear pore organization	GO:0006999	0.00228659	2.64081	14	1198	8	17231	SEH1L,RTN4,NUP107,TMEM170A,AHCTF1,NUP54,NDC1,NUP153
GO:BP	negative regulation of cellular process	GO:0048523	0.00236863	2.6255	3724	1198	326	17231	PARP14,IRF8,STAT3,STAT1,IRF1,DTX3L,SRGAP1,PLAGL1,SBNO2,CSF1,PRKG1,CIITA,EIF2AK2,ADAR,NOTCH1,LIMA1,PHACTR2,HERC4,ATAD1,CDKN2AIP,ZHX2,PML,MAF,KANK4,RAD1,CRLF3,PTGDR2,PTPN2,SOCS1,LOC100298356,ZNFX1,NMI,TRIM21,SAMHD1,LOC112441507,TFEC,BIRC3,FAS,BMF,SOCS3,KLF10,CD274,SFMBT2,CSNK1E,RIPK1,TES,DDX3X,DR1,CTDSPL,CGAS,PLEK,GJA1,PODXL,RNF31,PIM1,TGIF1,RERE,ATP9A,TNF,ARID5A,NOTCH2,TLR4,NR2F1,DIP2B,PTPRJ,MORC3…
GO:BP	double-strand break repair	GO:0006302	0.00244209	2.61224	201	1198	34	17231	DTX3L,RBBP8,PML,GINS2,SAMHD1,CGAS,EYA1,PRPF19,DCLRE1A,SMC5,PPP4R2,RNF138,PARP3,RMI1,ZGRF1,NBN,RAD50,FBH1,SLF1,UBE2V2,RIF1,SMCHD1,DEK,ATM,XRCC6,MMS22L,FANCM,CHEK1,ESCO2,RAD51C,SMC6,NSMCE2,ABRAXAS1,SLF2
GO:BP	regulation of immune system process	GO:0002682	0.00250325	2.6015	950	1198	105	17231	PARP14,STAT3,STAT1,IRF1,DTX3L,DDX58,CSF1,PARP9,IFI16,FCGR2A,ADAR,ZBP1,CD47,LCK,FCGR3A,LOC618733,PTPN2,SOCS1,NMI,TRIM21,SAMHD1,TAPBPL,KLF10,CD274,RIPK1,PJA2,CGAS,TNF,ARID5A,LOC100139670,IL2RA,NOTCH2,TLR4,PTPRJ,DDX21,ANO6,LOC107131209,CRK,HIF1A,DHX58,PLCL2,SCIN,CASP8,RB1,FOS,IFI35,C4A,IRF3,SMAP1,IL6ST,TBX21,VAV3,ISG15,PPP2R3C,MIA3,TNFRSF1B,SAMSN1,BCL6,STAP1,FCGR2B,ELMOD2,ZFP36,FCGR1A,PELI1,BCL2,SNX…
GO:BP	cell death	GO:0008219	0.00269842	2.56889	1351	1198	139	17231	IRF1,CSF1,EIF2AK2,ADAR,CASP7,PHLDA1,ZBP1,NOTCH1,LCK,IFIT2,EMP1,PML,PTPN2,BIRC3,FAS,CASP4,BMF,SOCS3,RIPK1,PMAIP1,DDX3X,RNF31,PIM1,RSL1D1,TNF,NOTCH2,TLR4,ANO6,AHCYL1,PICALM,STK3,HIF1A,CACNA1A,SCIN,CASP8,BCL3,RB1,GZMA,RELT,IRF3,HDAC1,CYLD,YME1L1,TNFRSF1B,EYA1,PSMD10,MCL1,ARF6,BCL6,GADD45B,CFLAR,RNF122,VEGFA,NAA15,ZFP36,RFK,TM7SF3,SRSF6,C1H3ORF38,RRN3,TNFSF10,PELI1,CCAR1,BCLAF1,CITED2,BCL2,RBCK1,SUSD…
GO:BP	negative regulation of macromolecule metabolic process	GO:0010605	0.002761	2.55893	2151	1198	204	17231	PARP14,IRF8,STAT3,IRF1,DTX3L,PLAGL1,SBNO2,PARP9,CIITA,EIF2AK2,ADAR,NOTCH1,PHACTR2,ZHX2,PML,MAF,PTPN2,SOCS1,LOC100298356,ZNFX1,ZC3HAV1,NMI,TRIM21,LOC112441507,TFEC,BIRC3,SOCS3,KLF10,SFMBT2,RIPK1,DDX3X,DR1,CTDSPL,XRN2,CGAS,TGIF1,RERE,TNF,ARID5A,NOTCH2,TLR4,NR2F1,PTPRJ,RNASEL,CHORDC1,LOC107131209,RTN4,USP25,PICALM,DDX6,HIF1A,DHX58,BCL3,RB1,GZMA,C4A,PNPT1,IRF3,HDAC1,MAP2K1,TBX21,ISG15,TXNIP,MDFIC,PPP…
GO:BP	positive regulation of signaling	GO:0023056	0.00281437	2.55062	1221	1198	128	17231	PARP14,STAT3,P2RY6,CSF1,TIFA,PARP9,EIF2AK2,ZBP1,NOTCH1,CD180,TRIM5,LCK,IFIT5,GKAP1,CDKN2AIP,PML,TRIM25,CRLF3,PTGDR2,PTPN2,LOC616948,SOCS1,NMI,TRIM21,SEH1L,FAS,LOC516599,TRIM34,CSNK1E,RIPK1,PJA2,PMAIP1,DDX3X,CGAS,RNF31,TNF,NOTCH2,TLR4,PTPRJ,DDX21,F2R,RELL1,RTN4,TRIM38,STK3,HIF1A,DHX58,CASP8,IFI35,WDR24,IRF3,RASGEF1A,AFAP1L2,MAP2K1,CYLD,IL6ST,MDFIC,MC1R,MCL1,TMEM33,GADD45B,STAP1,CFLAR,VEGFA,OSBPL8,…
GO:BP	response to organic substance	GO:0010033	0.00288818	2.53938	2052	1198	196	17231	PARP14,IRF8,STAT3,STAT1,LOC513659,LOC512486,GBP4,LOC781710,LOC507055,IRF1,P2RY6,STAT2,MX1,SBNO2,LOC511531,DDX58,CSF1,LPIN2,GBP5,PARP9,CIITA,IFI16,EIF2AK2,ADAR,CASP7,ZBP1,NOTCH1,CD47,CD180,KYNU,IFIT2,EXT1,GKAP1,PML,TRIM25,LOC618733,PTPN2,SOCS1,NMI,IFIH1,TRIM21,SAMHD1,FAS,SOCS3,CD274,RIPK1,MAN1A1,PMAIP1,CGAS,PIM1,IL15RA,TNF,ARID5A,LOC100139670,IL2RA,NOTCH2,IFNAR2,TLR4,DDX21,F2R,AHCYL1,STAT4,USP25,H…
GO:BP	protein metabolic process	GO:0019538	0.00291925	2.53473	4901	1198	413	17231	PARP14,STAT3,DTX3L,LOC788334,LAP3,CSF1,RNF19B,LOC509283,PARP9,PRKG1,EED,TOP1,EIF2AK2,ADAR,CASP7,APOL3,PHLDA1,PRKCH,LOC518495,TRIM5,LCK,PSMB9,UBA7,PHACTR2,PSMB10,ERAP1,EXT1,HERC4,PML,VCPIP1,MAPK6,TRIM25,PCMTD1,ERAP2,PTPN2,LOC616948,SOCS1,LOC100298356,NMI,IFIH1,TRIM21,LOC112441507,BIRC3,PSMB8,FAS,CASP4,LOC786352,SOCS3,LOC516599,TRIM34,CSNK1E,RIPK1,MAN1A1,PJA2,PMAIP1,DDX3X,TPST2,DR1,CTDSPL,MAP3K8,MM…
GO:BP	regulation of response to cytokine stimulus	GO:0060759	0.00320545	2.49411	102	1198	22	17231	PARP14,CSF1,PARP9,ADAR,ZBP1,PTPN2,SOCS1,IFIH1,SAMHD1,RIPK1,TLR4,HIF1A,IRF3,CYLD,ISG15,STAP1,OTUD4,TBK1,TICAM2,IRF7,CNOT7,MED1
GO:BP	regulation of RNA biosynthetic process	GO:2001141	0.00328406	2.48359	2807	1198	255	17231	PARP14,IRF8,STAT3,STAT1,IRF1,DTX3L,STAT2,PLAGL1,SBNO2,LPIN2,CIITA,EIF2AK2,NOTCH1,IRF9,TRIM5,ZHX2,PML,SP110,MAF,TRIM25,NAMPT,CRLF3,PTPN2,CREM,LOC616948,ZNFX1,MAFF,TRIM21,SP140L,TFEC,LOC516599,TRIM34,KLF10,SFMBT2,RIPK1,DDX3X,DR1,BATF2,PIM1,TGIF1,RERE,TNF,ARID5A,NOTCH2,RUNX1,TLR4,NR2F1,IKZF2,RNASEL,F2R,STAT4,KLF6,PICALM,TRIM38,STK3,LOC785873,HIF1A,MED13,KLF13,BCL3,RB1,FOS,CREBRF,IRF3,HDAC1,IER2,AFAP…
GO:BP	negative regulation of cellular metabolic process	GO:0031324	0.00353097	2.45211	2008	1198	192	17231	PARP14,IRF8,STAT3,IRF1,DTX3L,PLAGL1,SBNO2,CIITA,EIF2AK2,ADAR,NOTCH1,PHACTR2,ZHX2,PML,MAF,PTPN2,SOCS1,LOC100298356,ZNFX1,TRIM21,LOC112441507,TFEC,BIRC3,BMF,SOCS3,KLF10,SFMBT2,DDX3X,DR1,CTDSPL,CGAS,PLEK,TGIF1,RERE,TNF,ARID5A,NOTCH2,NR2F1,PTPRJ,CHORDC1,LOC107131209,RTN4,USP25,PICALM,DDX6,HIF1A,BCL3,RB1,GZMA,C4A,PNPT1,IRF3,HDAC1,TBX21,ISG15,TXNIP,MDFIC,PPP1R16B,HDAC4,DEPDC1,SAMSN1,PSMD10,LARP7,MCL1,J…
GO:BP	ncRNA metabolic process	GO:0034660	0.00356111	2.44841	398	1198	54	17231	STAT3,ADAR,RSL1D1,FTSJ1,BRIX1,NOL9,PNPT1,ELAC2,PRORSD1,RBFA,UTP15,LARP7,TRNT1,TRMT13,WDR75,WDR43,YARS2,DIS3,RPF2,MTREX,THUMPD1,MRPL44,SSB,NOL11,PUS1,QTRT2,C1D,METTL4,SBDS,RC3H2,ESF1,WDR12,INTS2,INTS4,MTO1,GTPBP4,UTP4,MPHOSPH10,TSEN15,SRFBP1,BMS1,AGO3,TRIT1,METTL16,WDR74,ADAT2,RC3H1,RPL7L1,TRMT11,TYW5,THG1L,UTP20,DDX17,FARSA
GO:BP	regulation of mRNA processing	GO:0050684	0.00390392	2.4085	111	1198	23	17231	AHCYL1,PRPF19,LARP7,FMR1,SRSF6,SRSF3,CPSF6,SRSF7,RBM17,CCNT1,RBM39,TRA2B,LEO1,DHX36,DDX5,RBM25,MBNL2,TRA2A,SRPK1,CTR9,CELF1,FAM172A,DDX17
GO:BP	cell cycle	GO:0007049	0.003998	2.39816	1170	1198	123	17231	STAT3,RBBP8,PML,RAD1,CRLF3,TRIM21,BIRC3,SEH1L,RIPK1,DDX3X,CTDSPL,GJA1,TNF,CHORDC1,MITD1,RB1,AFAP1L2,KIF2C,CYLD,UHRF2,PSME1,TMOD3,PSMD10,MASTL,CDK17,GADD45B,MX2,SMC5,NAA50,RMI2,ID2,CCAR1,KIF23,CITED2,BCL2,PARP3,EZR,CDK19,RMI1,HAUS6,NBN,RAD50,KIF18A,ARPP19,STAG2,SASS6,SBDS,CCNT1,SLF1,ZNF207,UBB,RIF1,NUPR1,UBR2,XPO1,XPC,CHMP2B,CTC1,HHEX,WDR12,EIF4E,PLRG1,AHCTF1,ATM,CDC27,USP3,HAUS3,TIMELESS,SMC4,TAF…
GO:BP	negative regulation of metabolic process	GO:0009892	0.00413035	2.38401	2328	1198	217	17231	PARP14,IRF8,STAT3,IRF1,DTX3L,PLAGL1,SBNO2,PARP9,CIITA,EIF2AK2,ADAR,NOTCH1,PHACTR2,ZHX2,PML,MAF,PTPN2,SOCS1,LOC100298356,ZNFX1,ZC3HAV1,NMI,TRIM21,LOC112441507,TFEC,BIRC3,BMF,SOCS3,KLF10,SFMBT2,RIPK1,DDX3X,DR1,CTDSPL,XRN2,CGAS,PLEK,TGIF1,RERE,TNF,ARID5A,NOTCH2,TLR4,NR2F1,PTPRJ,RNASEL,CHORDC1,LOC107131209,RTN4,USP25,PICALM,DDX6,HIF1A,DHX58,PLCL2,BCL3,RB1,GZMA,C4A,PNPT1,IRF3,HDAC1,MAP2K1,TBX21,ISG15,…
GO:BP	positive regulation of transcription by RNA polymerase II	GO:0045944	0.00460435	2.33683	1009	1198	109	17231	IRF8,STAT3,STAT1,IRF1,PLAGL1,SBNO2,LPIN2,CIITA,NOTCH1,MAF,NAMPT,CRLF3,MAFF,TFEC,KLF10,RIPK1,DDX3X,DR1,TNF,ARID5A,TLR4,RNASEL,STAT4,KLF6,HIF1A,MED13,BCL3,RB1,FOS,CREBRF,IRF3,HDAC1,IER2,HDAC4,EYA1,MC1R,LARP7,IRF4,BCL9L,VEGFA,ZNF639,ATAD2B,PCGF5,USF1,MLLT6,BCLAF1,CITED2,TBK1,MICAL2,ZMIZ1,EGR1,PPRC1,HLTF,MDM2,ONECUT2,MAX,MDM4,SERTAD1,ZNF672,CCNT1,SLC30A9,RFX5,ASXL1,KLF12,ETV6,LEO1,HHEX,SP3,AKIRIN1,DH…
GO:BP	protein localization	GO:0008104	0.00470992	2.32699	1743	1198	170	17231	STAT3,LOC781710,DTX3L,HPS4,GBP5,TRIM5,PML,VCPIP1,TRIM25,LOC616948,TRIM21,SNX16,SEH1L,LOC516599,TRIM34,CSNK1E,MAN1A1,CMTM6,DDX3X,MMD,PLEK,LAMP3,GJA1,RSL1D1,TNF,LOC100139670,TLR4,GDI2,MORC3,F2R,AHCYL1,RANBP2,RTN4,PICALM,HIF1A,VPS54,STX11,SCIN,RB1,MYOM1,VPS36,VMP1,TXNIP,MIA3,NUP107,PRPF19,RAB14,PSMD10,LARP7,ARF6,BCL6,SDAD1,RAP2A,RIC1,OSBPL8,SPTSSA,SMC5,HEATR5B,TM7SF3,TMED2,XPA,LYST,NMD3,SEC24B,DERL1…
GO:BP	cellular nitrogen compound biosynthetic process	GO:0044271	0.00596722	2.22423	4081	1198	350	17231	PARP14,IRF8,STAT3,STAT1,IRF1,DTX3L,STAT2,PLAGL1,SBNO2,LPIN2,CIITA,EIF2AK2,NOTCH1,IRF9,KYNU,TRIM5,ZHX2,PML,SP110,MAF,TRIM25,NAMPT,CRLF3,PTPN2,CREM,LOC616948,ZNFX1,NMI,MAFF,TRIM21,SP140L,SAMHD1,TFEC,LOC516599,TRIM34,KLF10,SFMBT2,RIPK1,DDX3X,DR1,XRN2,BATF2,PIM1,TGIF1,RERE,TNF,ARID5A,FTSJ1,NOTCH2,RUNX1,TLR4,NR2F1,IKZF2,RNASEL,DDX21,F2R,STAT4,KLF6,PICALM,TRIM38,DDX6,STK3,CERS5,LOC785873,HIF1A,MED13,KL…
GO:BP	regulation of transcription, DNA-templated	GO:0006355	0.00626029	2.20341	2804	1198	253	17231	PARP14,IRF8,STAT3,STAT1,IRF1,DTX3L,STAT2,PLAGL1,SBNO2,LPIN2,CIITA,EIF2AK2,NOTCH1,IRF9,TRIM5,ZHX2,PML,SP110,MAF,TRIM25,NAMPT,CRLF3,PTPN2,CREM,LOC616948,ZNFX1,MAFF,TRIM21,SP140L,TFEC,LOC516599,TRIM34,KLF10,SFMBT2,RIPK1,DDX3X,DR1,BATF2,PIM1,TGIF1,RERE,TNF,ARID5A,NOTCH2,RUNX1,TLR4,NR2F1,IKZF2,RNASEL,F2R,STAT4,KLF6,PICALM,TRIM38,STK3,LOC785873,HIF1A,MED13,KLF13,BCL3,RB1,FOS,CREBRF,IRF3,HDAC1,IER2,AFAP…
GO:BP	regulation of nucleic acid-templated transcription	GO:1903506	0.00643682	2.19133	2805	1198	253	17231	PARP14,IRF8,STAT3,STAT1,IRF1,DTX3L,STAT2,PLAGL1,SBNO2,LPIN2,CIITA,EIF2AK2,NOTCH1,IRF9,TRIM5,ZHX2,PML,SP110,MAF,TRIM25,NAMPT,CRLF3,PTPN2,CREM,LOC616948,ZNFX1,MAFF,TRIM21,SP140L,TFEC,LOC516599,TRIM34,KLF10,SFMBT2,RIPK1,DDX3X,DR1,BATF2,PIM1,TGIF1,RERE,TNF,ARID5A,NOTCH2,RUNX1,TLR4,NR2F1,IKZF2,RNASEL,F2R,STAT4,KLF6,PICALM,TRIM38,STK3,LOC785873,HIF1A,MED13,KLF13,BCL3,RB1,FOS,CREBRF,IRF3,HDAC1,IER2,AFAP…
GO:BP	regulation of cellular protein metabolic process	GO:0032268	0.00671813	2.17275	1865	1198	179	17231	PARP14,STAT3,DTX3L,CSF1,RNF19B,EIF2AK2,ADAR,LCK,PHACTR2,PML,PTPN2,SOCS1,LOC100298356,NMI,TRIM21,LOC112441507,BIRC3,FAS,SOCS3,CSNK1E,RIPK1,PMAIP1,DDX3X,CTDSPL,MAP3K8,MMD,PPP2R5B,TNF,ARID5A,TLR4,DIP2B,PTPRJ,CHORDC1,F2R,LOC107131209,USP25,PICALM,DDX6,STK3,HIF1A,PLCL2,CASP8,BCL3,RB1,C4A,PNPT1,AFAP1L2,MAP2K1,IL6ST,ISG15,PPP2R3C,MDFIC,PPP1R16B,PSME1,HDAC4,NUP107,TNFRSF1B,SAMSN1,PSMD10,JARID2,BCL6,MASTL…
GO:BP	organic substance catabolic process	GO:1901575	0.00729815	2.13679	1583	1198	156	17231	STAT3,DTX3L,RNF19B,LPIN2,KYNU,CDADC1,PSMB9,UBA7,PSMB10,ERAP1,EXT1,ZHX2,PML,TRIM25,ZC3HAV1,SAMHD1,PSMB8,SDS,CSNK1E,RIPK1,MAN1A1,PMAIP1,XRN2,INPP5A,KLHL3,TNF,USP18,RNASEL,USP25,HIF1A,PLCL2,BPNT1,CASP8,PSMA2,GZMA,PNPT1,VPS36,CYLD,CTSS,TBX21,ISG15,UBR1,YME1L1,PSME1,USP9X,HDAC4,NUDT7,TNFRSF1B,PRPF19,PSMD10,ABAT,UBE2D3,RNF122,ZYG11B,GLS,ZFP36,FMR1,MYEF2,CNP,USP15,NUDT9,DERL1,ELAVL1,PELI1,DIS3,MTREX,IVD…
GO:BP	regulation of intracellular signal transduction	GO:1902531	0.0075893	2.1198	1197	1198	124	17231	STAT1,P2RY6,CSF1,TIFA,EIF2AK2,NOTCH1,TRIM5,LCK,RALGPS2,IFIT5,TRIM25,PTPN2,LOC616948,NMI,TRIM21,SEH1L,FAS,LOC516599,TRIM34,RIPK1,PJA2,PMAIP1,DDX3X,CGAS,RNF31,TNF,NOTCH2,TLR4,PTPRJ,DDX21,F2R,RELL1,CRK,RTN4,TRIM38,STK3,HIF1A,DHX58,CASP8,BCL3,IFI35,WDR24,HDAC1,RASGEF1A,MAP2K1,CYLD,UBR1,MDFIC,PPP1R16B,CYTH3,AKAP7,MC1R,PSMD10,MCL1,ARF6,BCL6,GADD45B,RAP2A,CFLAR,VEGFA,OSBPL8,AIDA,RRN3,USP15,ARHGAP18,TNFS…
GO:BP	regulation of mRNA metabolic process	GO:1903311	0.00810682	2.09115	221	1198	35	17231	ZC3HAV1,RNASEL,AHCYL1,PNPT1,PRPF19,LARP7,ZFP36,FMR1,MYEF2,SRSF6,ELAVL1,SRSF3,CPSF6,SRSF7,RBM17,SYNCRIP,CCNT1,DCPS,RBM39,RC3H2,TRA2B,LEO1,DHX36,DDX5,RBM25,MBNL2,TRA2A,SRPK1,CTR9,CNOT7,CELF1,RC3H1,FAM172A,FASTKD3,DDX17
GO:BP	negative regulation of necrotic cell death	GO:0060547	0.00863871	2.06355	16	1198	8	17231	BIRC3,RIPK1,RNF31,CASP8,PELI1,RBCK1,NUPR1,BIRC2
GO:BP	interferon-gamma-mediated signaling pathway	GO:0060333	0.00863871	2.06355	16	1198	8	17231	PARP14,STAT1,IRF1,PARP9,PTPN2,SOCS1,NMI,MED1
GO:BP	regulation of protein modification process	GO:0031399	0.00938093	2.02775	1238	1198	127	17231	PARP14,DTX3L,CSF1,EIF2AK2,ADAR,PHACTR2,PML,PTPN2,SOCS1,NMI,TRIM21,BIRC3,FAS,SOCS3,RIPK1,DDX3X,CTDSPL,MAP3K8,MMD,PPP2R5B,TNF,ARID5A,TLR4,DIP2B,PTPRJ,CHORDC1,STK3,HIF1A,PLCL2,RB1,AFAP1L2,MAP2K1,IL6ST,ISG15,PPP2R3C,MDFIC,PPP1R16B,HDAC4,NUP107,SAMSN1,PSMD10,JARID2,BCL6,MASTL,GADD45B,STAP1,RAP2A,VEGFA,IBTK,OSBPL8,AIDA,FMR1,DCUN1D5,PPP4R2,PMEPA1,MLLT6,DERL1,OTUD4,PELI1,MAP4K5,BCL2,ZMIZ1,HMGCR,SMPD1,TSG…
GO:BP	regulation of response to biotic stimulus	GO:0002831	0.00970755	2.01289	195	1198	32	17231	PARP14,STAT1,DTX3L,PARP9,IFI16,ADAR,ZBP1,CD180,PTPN2,SOCS1,NMI,TRIM21,SAMHD1,CGAS,LOC100139670,TLR4,DHX58,IFI35,IRF3,ISG15,PPP2R3C,ELMOD2,USP15,TBK1,TIGAR,XRCC6,LRP8,IRF7,CNOT7,ITCH,MED1,MR1
GO:BP	ncRNA processing	GO:0034470	0.0100152	1.99934	320	1198	45	17231	STAT3,ADAR,RSL1D1,FTSJ1,BRIX1,NOL9,ELAC2,RBFA,UTP15,LARP7,TRNT1,TRMT13,WDR75,WDR43,RPF2,MTREX,THUMPD1,MRPL44,SSB,NOL11,PUS1,QTRT2,C1D,SBDS,ESF1,WDR12,INTS2,INTS4,MTO1,GTPBP4,UTP4,MPHOSPH10,TSEN15,SRFBP1,BMS1,AGO3,TRIT1,METTL16,WDR74,ADAT2,RPL7L1,TRMT11,TYW5,THG1L,UTP20
GO:BP	regulation of protein metabolic process	GO:0051246	0.0100584	1.99747	1990	1198	188	17231	PARP14,STAT3,DTX3L,CSF1,RNF19B,EIF2AK2,ADAR,LCK,PSMB9,PHACTR2,PML,PTPN2,SOCS1,LOC100298356,NMI,TRIM21,LOC112441507,BIRC3,PSMB8,FAS,SOCS3,CSNK1E,RIPK1,PMAIP1,DDX3X,CTDSPL,MAP3K8,MMD,PPP2R5B,TNF,ARID5A,TLR4,DIP2B,PTPRJ,CHORDC1,F2R,LOC107131209,RTN4,USP25,PICALM,DDX6,STK3,HIF1A,PLCL2,CASP8,BCL3,RB1,C4A,PNPT1,HDAC1,AFAP1L2,MAP2K1,IL6ST,ISG15,PPP2R3C,MDFIC,PPP1R16B,PSME1,HDAC4,NUP107,TNFRSF1B,SAMSN1,P…
GO:BP	establishment of localization in cell	GO:0051649	0.0102067	1.99111	1531	1198	151	17231	STAT3,TAP1,DTX3L,HPS4,RAB27A,ATAD1,PML,SNX16,SEH1L,MAN1A1,CMTM6,PLEK,GJA1,ATP9A,F2R,AHCYL1,RANBP2,PICALM,HIF1A,VPS54,STX11,WASHC4,KIF2C,VPS36,TXNIP,MIA3,NUP107,RAB14,TRPV2,ARF6,CLCN3,SDAD1,MYO1E,MX2,RIC1,IBTK,HEATR5B,NUP160,TMED2,LYST,NMD3,SEC24B,DERL1,ELAVL1,SRP54,SRSF3,REPS2,BCL2,LIN7C,SNX4,STAM2,AP1AR,CPSF6,SSB,EZR,ABCE1,COPB1,YWHAG,ERBIN,TRAM1,IPO7,SNAP25,ARL5B,SNAP23,KIF18A,ZFYVE16,SNX6,TBC1…
GO:BP	organonitrogen compound catabolic process	GO:1901565	0.0112286	1.94967	1017	1198	108	17231	DTX3L,RNF19B,KYNU,CDADC1,PSMB9,UBA7,PSMB10,ERAP1,EXT1,PML,TRIM25,SAMHD1,PSMB8,SDS,CSNK1E,RIPK1,MAN1A1,PMAIP1,KLHL3,TNF,USP18,USP25,CASP8,PSMA2,GZMA,VPS36,CYLD,CTSS,TBX21,ISG15,UBR1,YME1L1,PSME1,USP9X,NUDT7,TNFRSF1B,PRPF19,PSMD10,ABAT,UBE2D3,RNF122,ZYG11B,GLS,USP15,NUDT9,DERL1,PELI1,IVD,RNF19A,EZR,TNFAIP1,RBCK1,HMGCR,SMPD1,TSG101,PSMA3,BFAR,LTN1,HM13,UCHL5,AZIN1,RNF114,UBB,NUPR1,UBR2,LAMP2,XPO1,NE…
GO:BP	cellular macromolecule localization	GO:0070727	0.0114052	1.9429	1303	1198	132	17231	STAT3,LOC781710,DTX3L,HPS4,GBP5,PML,VCPIP1,SNX16,SEH1L,CSNK1E,MAN1A1,DDX3X,LAMP3,GJA1,TNF,MORC3,AHCYL1,RANBP2,RTN4,PICALM,STX11,SCIN,RB1,VPS36,TXNIP,MIA3,NUP107,PRPF19,RAB14,LARP7,ARF6,RAP2A,RIC1,ZFP36,OSBPL8,SMC5,TMED2,XPA,NMD3,SEC24B,DERL1,ELAVL1,SRP54,RPF2,RAB12,STAM2,AP1AR,TM9SF3,SSB,PARP3,EZR,COPB1,YWHAG,ERBIN,TRAM1,IPO7,TSG101,SNAP25,ARL5B,SAV1,ZFYVE16,SNX6,HM13,VPS26A,ZFAND1,SLF1,LAMP2,XPO…
GO:BP	cytosolic transport	GO:0016482	0.0116519	1.9336	118	1198	23	17231	SNX16,ATP9A,VPS54,RAB14,RIC1,HEATR5B,AP1AR,EZR,SNX6,TBC1D23,VPS26A,GCC2,ARFIP1,TMEM87A,DNAJC13,WDR91,TBC1D17,ANKFY1,HOOK3,EPS15,LRRK2,ARL8B,DENND5A
GO:BP	positive regulation of response to cytokine stimulus	GO:0060760	0.011774	1.92908	44	1198	13	17231	PARP14,CSF1,PARP9,ZBP1,IFIH1,RIPK1,TLR4,HIF1A,IRF3,TBK1,TICAM2,IRF7,MED1
GO:BP	regulation of response to stimulus	GO:0048583	0.0124	1.90658	2816	1198	252	17231	PARP14,STAT3,STAT1,IRF1,DTX3L,P2RY6,SBNO2,CSF1,TIFA,PARP9,PRKG1,IFI16,EIF2AK2,FCGR2A,ADAR,ZBP1,NOTCH1,CD47,CD180,TRIM5,LCK,HERC4,RALGPS2,IFIT5,FCGR3A,GKAP1,CDKN2AIP,PML,TRIM25,LOC618733,CRLF3,PTGDR2,PTPN2,LOC616948,SOCS1,NMI,IFIH1,TRIM21,SAMHD1,SEH1L,FAS,SOCS3,LOC516599,TRIM34,CSNK1E,RIPK1,PJA2,PMAIP1,DDX3X,NAPEPLD,CGAS,PLEK,RNF31,RSL1D1,TNF,ARID5A,LOC100139670,NOTCH2,TLR4,PTPRJ,CHORDC1,DDX21,F2R…
GO:BP	regulation of immune response	GO:0050776	0.012414	1.90609	521	1198	64	17231	PARP14,STAT1,IRF1,DTX3L,PARP9,IFI16,FCGR2A,ADAR,ZBP1,LCK,FCGR3A,LOC618733,PTPN2,SOCS1,NMI,TRIM21,SAMHD1,CGAS,TNF,ARID5A,LOC100139670,TLR4,PTPRJ,LOC107131209,DHX58,PLCL2,IFI35,C4A,IRF3,TBX21,VAV3,ISG15,PPP2R3C,TNFRSF1B,SAMSN1,BCL6,STAP1,FCGR2B,ELMOD2,FCGR1A,BCL2,SNX4,TBK1,PARP3,EZR,RBCK1,LOC107131749,RIF1,RC3H2,BOLA-DRA,PLEKHA1,XRCC6,LRP8,IRF7,FYB1,LTA,CNOT7,ITCH,SPPL2A,RC3H1,PPP3CB,MED1,ATAD5,MR1
GO:BP	chromosome segregation	GO:0007059	0.013444	1.87147	274	1198	40	17231	SEH1L,DDX3X,RB1,KIF2C,SMC5,NAA50,RMI2,KIF23,RMI1,KIF18A,STAG2,SLF1,ZNF207,CHMP2B,ATM,CDC27,SMC4,DYNC1LI1,DLGAP5,ACTR3,MCMBP,SRPK1,KPNB1,NDC80,CENPK,FANCM,NDC1,EML4,ESCO2,BUB1B,SMC2,RAD51C,SPC25,ARL8B,SMC6,SGO2,NSMCE2,SETDB2,SLF2,PDS5B
GO:BP	regulation of cytokine-mediated signaling pathway	GO:0001959	0.0139941	1.85405	95	1198	20	17231	PARP14,CSF1,PARP9,ADAR,ZBP1,PTPN2,SOCS1,SAMHD1,RIPK1,HIF1A,IRF3,CYLD,ISG15,STAP1,OTUD4,TBK1,TICAM2,IRF7,CNOT7,MED1
GO:BP	cellular protein localization	GO:0034613	0.0144299	1.84074	1297	1198	131	17231	STAT3,LOC781710,DTX3L,HPS4,GBP5,PML,VCPIP1,SNX16,SEH1L,CSNK1E,MAN1A1,DDX3X,LAMP3,GJA1,TNF,MORC3,AHCYL1,RANBP2,RTN4,PICALM,STX11,SCIN,RB1,VPS36,TXNIP,MIA3,NUP107,PRPF19,RAB14,LARP7,ARF6,RAP2A,RIC1,OSBPL8,SMC5,TMED2,XPA,NMD3,SEC24B,DERL1,ELAVL1,SRP54,RPF2,RAB12,STAM2,AP1AR,TM9SF3,SSB,PARP3,EZR,COPB1,YWHAG,ERBIN,TRAM1,IPO7,TSG101,SNAP25,ARL5B,SAV1,ZFYVE16,SNX6,HM13,VPS26A,ZFAND1,SLF1,LAMP2,XPO1,KIF5…
GO:BP	nuclear pore complex assembly	GO:0051292	0.0162661	1.78872	9	1198	6	17231	RTN4,NUP107,TMEM170A,AHCTF1,NDC1,NUP153
GO:BP	negative regulation of necroptotic process	GO:0060546	0.0190102	1.72101	13	1198	7	17231	BIRC3,RIPK1,RNF31,CASP8,PELI1,RBCK1,BIRC2
GO:BP	sister chromatid segregation	GO:0000819	0.0196467	1.70671	165	1198	28	17231	SEH1L,RB1,KIF2C,SMC5,NAA50,RMI2,KIF23,KIF18A,STAG2,SLF1,ZNF207,CHMP2B,CDC27,SMC4,DYNC1LI1,MCMBP,KPNB1,NDC80,CENPK,EML4,ESCO2,BUB1B,SMC2,RAD51C,SGO2,NSMCE2,SLF2,PDS5B
GO:BP	positive regulation of type I interferon production	GO:0032481	0.020254	1.69349	46	1198	13	17231	STAT1,IRF1,DDX58,IFIH1,DDX3X,CGAS,TLR4,DHX58,IRF3,TBK1,DHX36,IRF7,HSPD1
GO:BP	programmed cell death	GO:0012501	0.0214505	1.66856	1259	1198	127	17231	IRF1,EIF2AK2,ADAR,CASP7,PHLDA1,ZBP1,NOTCH1,LCK,IFIT2,PML,PTPN2,BIRC3,FAS,CASP4,BMF,SOCS3,RIPK1,PMAIP1,DDX3X,RNF31,PIM1,RSL1D1,TNF,NOTCH2,ANO6,AHCYL1,STK3,HIF1A,SCIN,CASP8,BCL3,RB1,GZMA,RELT,IRF3,HDAC1,CYLD,YME1L1,TNFRSF1B,EYA1,PSMD10,MCL1,ARF6,BCL6,GADD45B,CFLAR,RNF122,VEGFA,NAA15,ZFP36,RFK,TM7SF3,C1H3ORF38,RRN3,TNFSF10,PELI1,CCAR1,BCLAF1,CITED2,BCL2,RBCK1,SMPD1,EGR1,NBN,PIK3CA,BFAR,SAV1,FBH1,MDM…
GO:BP	modification-dependent macromolecule catabolic process	GO:0043632	0.0216265	1.66501	530	1198	64	17231	DTX3L,RNF19B,UBA7,PML,TRIM25,CSNK1E,MAN1A1,KLHL3,USP18,USP25,PSMA2,PNPT1,VPS36,CYLD,TBX21,ISG15,UBR1,USP9X,PSMD10,UBE2D3,RNF122,ZYG11B,USP15,DERL1,PELI1,RNF19A,TNFAIP1,RBCK1,TSG101,PSMA3,BFAR,LTN1,UCHL5,RNF114,UBR2,XPO1,NEDD4L,RC3H2,RCHY1,UBQLN1,UBA6,USP3,NEMF,RNF11,PSMA4,USP1,SOCS4,PCNP,USP33,CUL4B,RAD23B,USP37,DET1,RLIM,ITCH,LRRK2,RC3H1,UBE2D1,PLAA,CUL2,UBXN2A,GLMN,CUL5,C24H18ORF25
GO:BP	positive regulation of cell death	GO:0010942	0.0218512	1.66053	381	1198	50	17231	PHLDA1,ZBP1,NOTCH1,LCK,IFIT2,PML,PTPN2,FAS,BMF,RIPK1,PMAIP1,DDX3X,TNF,NOTCH2,TLR4,ANO6,PICALM,STK3,SCIN,GZMA,CYLD,TNFRSF1B,MCL1,BCL6,GADD45B,RNF122,C1H3ORF38,TNFSF10,CCAR1,BCLAF1,RBCK1,EIF2S1,SMPD1,SAV1,FBH1,TIGAR,FNIP1,UBB,NUPR1,PAK2,ATM,DAXX,DNM1L,CELF1,TNFRSF10D,TCTN3,LRRK2,ATF6,NCK1,PPID
GO:BP	cellular response to organic substance	GO:0071310	0.0273099	1.56368	1708	1198	163	17231	PARP14,IRF8,STAT3,STAT1,LOC513659,LOC512486,GBP4,LOC781710,LOC507055,IRF1,P2RY6,STAT2,MX1,SBNO2,LOC511531,CSF1,LPIN2,GBP5,PARP9,IFI16,EIF2AK2,ADAR,CASP7,ZBP1,NOTCH1,CD47,CD180,IFIT2,EXT1,GKAP1,PML,TRIM25,PTPN2,SOCS1,NMI,IFIH1,SAMHD1,FAS,SOCS3,CD274,RIPK1,CGAS,PIM1,IL15RA,TNF,ARID5A,LOC100139670,IL2RA,NOTCH2,IFNAR2,TLR4,AHCYL1,STAT4,HIF1A,CACNA1A,FOS,PNPT1,IRF3,HDAC1,IFI47,CYLD,IL6ST,CTSS,GRAMD1C,…
GO:BP	cellular component organization	GO:0016043	0.0277118	1.55734	5004	1198	413	17231	DTX3L,HPS4,TIFA,PIK3C2B,GBP5,EED,TOP1,EIF2AK2,ADAR,STRIP1,FERMT3,NOTCH1,BAZ1A,LIMA1,MYPN,PHACTR2,EXT1,EMP1,ATAD1,CDKN2AIP,PML,VCPIP1,MAPK6,KANK4,RAD1,CRLF3,ZNFX1,CD53,SAMHD1,SEH1L,TAPBPL,RIPK1,PMAIP1,DDX3X,DR1,PLEK,SPATA6,GJA1,PODXL,RERE,ATP9A,TNF,ARID5A,TAPBP,NOTCH2,TLR4,DIP2B,PTPRJ,CHORDC1,F2R,ANO6,AHCYL1,CRK,RTN4,PICALM,DDX6,MITD1,HIF1A,PLEKHO1,VPS54,STX11,SCIN,BCL3,RB1,WASHC4,PNPT1,HDAC1,KIF2…
GO:BP	mRNA 3'-end processing	GO:0031124	0.0277639	1.55652	54	1198	14	17231	AHCYL1,PNPT1,CPSF6,CSTF1,CCNT1,PAPOLG,LEO1,DHX36,MTPAP,CPSF2,CSTF2T,CTR9,PCF11,APP
GO:BP	regulation of cell death	GO:0010941	0.0295063	1.53009	1099	1198	113	17231	CSF1,EIF2AK2,ADAR,PHLDA1,ZBP1,NOTCH1,LCK,IFIT2,PML,PTPN2,BIRC3,FAS,CASP4,BMF,SOCS3,RIPK1,PMAIP1,DDX3X,RNF31,PIM1,RSL1D1,TNF,NOTCH2,TLR4,ANO6,PICALM,STK3,HIF1A,SCIN,CASP8,BCL3,GZMA,IRF3,HDAC1,CYLD,YME1L1,TNFRSF1B,EYA1,PSMD10,MCL1,BCL6,GADD45B,CFLAR,RNF122,VEGFA,NAA15,ZFP36,TM7SF3,SRSF6,C1H3ORF38,RRN3,TNFSF10,PELI1,CCAR1,BCLAF1,CITED2,BCL2,RBCK1,EIF2S1,SMPD1,EGR1,PIK3CA,BFAR,SAV1,FBH1,MDM2,HSH2D,MD…
GO:BP	modification-dependent protein catabolic process	GO:0019941	0.0308449	1.51082	525	1198	63	17231	DTX3L,RNF19B,UBA7,PML,TRIM25,CSNK1E,MAN1A1,KLHL3,USP18,USP25,PSMA2,VPS36,CYLD,TBX21,ISG15,UBR1,USP9X,PSMD10,UBE2D3,RNF122,ZYG11B,USP15,DERL1,PELI1,RNF19A,TNFAIP1,RBCK1,TSG101,PSMA3,BFAR,LTN1,UCHL5,RNF114,UBR2,XPO1,NEDD4L,RC3H2,RCHY1,UBQLN1,UBA6,USP3,NEMF,RNF11,PSMA4,USP1,SOCS4,PCNP,USP33,CUL4B,RAD23B,USP37,DET1,RLIM,ITCH,LRRK2,RC3H1,UBE2D1,PLAA,CUL2,UBXN2A,GLMN,CUL5,C24H18ORF25
GO:BP	RNA 3'-end processing	GO:0031123	0.0315868	1.50049	92	1198	19	17231	AHCYL1,PNPT1,ELAC2,LARP7,TRNT1,CPSF6,SSB,PAPOLA,CSTF1,CCNT1,PAPOLG,LEO1,DHX36,MTPAP,CPSF2,CSTF2T,CTR9,PCF11,APP
GO:BP	protein localization to organelle	GO:0033365	0.0362956	1.44015	650	1198	74	17231	STAT3,LOC781710,DTX3L,GBP5,PML,VCPIP1,SNX16,MAN1A1,DDX3X,LAMP3,MORC3,RANBP2,RTN4,RB1,VPS36,TXNIP,MIA3,NUP107,LARP7,ARF6,OSBPL8,SMC5,XPA,NMD3,ELAVL1,SRP54,RPF2,SSB,PARP3,EZR,TRAM1,IPO7,TSG101,ARL5B,ZFYVE16,SLF1,LAMP2,XPO1,RAB33B,GCC2,HHEX,PLRG1,TMEM30A,NUP54,SEC62,PEX3,ZWILCH,ROCK2,VPS13A,SH3GLB1,TOMM20,KPNB1,NDC80,ESCO2,BUB1B,CCT6A,TMED10,KPNA1,IPO11,DNM1L,UBXN2B,NUP153,CHP1,CCT4,HSPD1,CCT2,HOOK3…
GO:BP	erythrocyte homeostasis	GO:0034101	0.0366451	1.43598	101	1198	20	17231	STAT3,STAT1,ADAR,PTPN2,HIF1A,RB1,ALAS1,SMAP1,ISG15,TMOD3,BCL6,ZFP36,CITED2,PRMT1,SP3,JAK2,UBA5,L3MBTL3,IREB2,MED1
GO:BP	erythrocyte differentiation	GO:0030218	0.0435638	1.36087	94	1198	19	17231	STAT3,STAT1,ADAR,PTPN2,HIF1A,RB1,ALAS1,SMAP1,ISG15,TMOD3,BCL6,ZFP36,CITED2,PRMT1,SP3,JAK2,UBA5,L3MBTL3,MED1
GO:BP	regulation of protein ubiquitination	GO:0031396	0.0443504	1.3531	154	1198	26	17231	DTX3L,NMI,BIRC3,DDX3X,ISG15,PSMD10,MASTL,DERL1,PELI1,NDFIP2,UBB,RCHY1,UBQLN1,DAXX,BIRC2,GTPBP4,DCUN1D1,FANCM,PARP10,CTR9,PRMT3,LRRK2,UBE2D1,PLAA,UBXN2A,GLMN
GO:BP	positive regulation of myeloid cell differentiation	GO:0045639	0.0469735	1.32815	71	1198	16	17231	STAT3,STAT1,CSF1,KLF10,RIPK1,TNF,NOTCH2,HIF1A,SCIN,CASP8,RB1,FOS,SMAP1,ISG15,PRMT1,MED1
GO:BP	positive regulation of protein modification by small protein conjugation or removal	GO:1903322	0.0495177	1.30524	103	1198	20	17231	NMI,BIRC3,DDX3X,HDAC4,PSMD10,MASTL,DCUN1D5,DERL1,PELI1,NDFIP2,UBB,RCHY1,UBQLN1,BIRC2,UBA2,DCUN1D1,FANCM,CTR9,LRRK2,UBE2D1
GO:CC	intracellular anatomical structure	GO:0005622	1.02674e-47	46.9885	12239	1197	1044	17622	PARP14,IRF8,STAT3,STAT1,TAP1,LOC513659,LOC512486,GBP4,LOC781710,LOC507055,IRF1,DTX3L,SRRD,STAT2,MX1,LAP3,SRGAP1,OAS1X,PLAGL1,RBBP8,LOC511531,DDX58,CSF1,RNF19B,HPS4,TIFA,PIK3C2B,LPIN2,SLC16A7,GBP5,PARP9,PRKG1,CIITA,EED,TOP1,EIF2AK2,ADAR,CASP7,PHLDA1,STRIP1,PRKCH,ZBP1,FERMT3,NOTCH1,BAZ1A,IRF9,LIMA1,MYPN,KYNU,TRIM5,CDADC1,LCK,PSMB9,UBA7,FNBP1,IFI44L,PSMB10,IFIT2,ERAP1,EXT1,HERC4,RAB27A,LGALS8,IFIT5,…
GO:CC	intracellular membrane-bounded organelle	GO:0043231	4.61944e-44	43.3354	9322	1197	867	17622	PARP14,IRF8,STAT3,STAT1,TAP1,LOC513659,LOC512486,GBP4,LOC781710,LOC507055,IRF1,DTX3L,SRRD,STAT2,MX1,LAP3,OAS1X,PLAGL1,RBBP8,LOC511531,CSF1,RNF19B,HPS4,PIK3C2B,LPIN2,SLC16A7,GBP5,PARP9,CIITA,EED,TOP1,ADAR,CASP7,PHLDA1,STRIP1,ZBP1,NOTCH1,BAZ1A,IRF9,KYNU,TRIM5,CDADC1,UBA7,FNBP1,PSMB10,IFIT2,ERAP1,EXT1,HERC4,RAB27A,GKAP1,CCDC86,CDKN2AIP,NUB1,ZHX2,PML,SP110,MAF,VCPIP1,MAPK6,OAS1Z,TRIM25,LOC618733,RAD1…
GO:CC	intracellular organelle	GO:0043229	5.91404e-40	39.2281	10637	1197	937	17622	PARP14,IRF8,STAT3,STAT1,TAP1,LOC513659,LOC512486,GBP4,LOC781710,LOC507055,IRF1,DTX3L,SRRD,STAT2,MX1,LAP3,OAS1X,PLAGL1,RBBP8,LOC511531,CSF1,RNF19B,HPS4,PIK3C2B,LPIN2,SLC16A7,GBP5,PARP9,CIITA,EED,TOP1,ADAR,CASP7,PHLDA1,STRIP1,ZBP1,FERMT3,NOTCH1,BAZ1A,IRF9,LIMA1,MYPN,KYNU,TRIM5,CDADC1,LCK,UBA7,FNBP1,PSMB10,IFIT2,ERAP1,EXT1,HERC4,RAB27A,IFIT5,GKAP1,GRAMD2B,CCDC86,CDKN2AIP,NUB1,ZHX2,KIF15,PML,SP110,MA…
GO:CC	nuclear lumen	GO:0031981	4.6098e-39	38.3363	3295	1197	413	17622	IRF8,STAT3,STAT1,LOC781710,DTX3L,LAP3,OAS1X,PLAGL1,RBBP8,CSF1,PIK3C2B,SLC16A7,CIITA,EED,TOP1,ADAR,PHLDA1,BAZ1A,KYNU,TRIM5,HERC4,CCDC86,CDKN2AIP,NUB1,ZHX2,PML,SP110,OAS1Z,TRIM25,RAD1,NAMPT,PTPN2,GINS2,LOC616948,SOCS1,NMI,MAFF,TRIM21,SAMHD1,TFEC,BIRC3,FAS,LOC516599,TRIM34,SFMBT2,DDX3X,DR1,XRN2,GJA1,SRSF10,PIM1,TGIF1,RSL1D1,RERE,ARID5A,NOTCH2,NR2F1,MORC3,BRIX1,DDX21,RANBP2,KLF6,HIF1A,MED13,VPS54,CAS…
GO:CC	membrane-bounded organelle	GO:0043227	1.09486e-38	37.9606	9689	1197	876	17622	PARP14,IRF8,STAT3,STAT1,TAP1,LOC513659,LOC512486,GBP4,LOC781710,LOC507055,IRF1,DTX3L,SRRD,STAT2,MX1,LAP3,OAS1X,PLAGL1,RBBP8,LOC511531,CSF1,RNF19B,HPS4,PIK3C2B,LPIN2,SLC16A7,GBP5,PARP9,CIITA,EED,TOP1,ADAR,CASP7,PHLDA1,STRIP1,ZBP1,NOTCH1,BAZ1A,IRF9,KYNU,TRIM5,CDADC1,UBA7,FNBP1,PSMB10,IFIT2,ERAP1,EXT1,HERC4,RAB27A,GKAP1,CCDC86,CDKN2AIP,NUB1,ZHX2,PML,SP110,MAF,VCPIP1,MAPK6,OAS1Z,TRIM25,LOC618733,RAD1…
GO:CC	intracellular organelle lumen	GO:0070013	5.28131e-38	37.2773	3587	1197	435	17622	IRF8,STAT3,STAT1,LOC781710,DTX3L,LAP3,OAS1X,PLAGL1,RBBP8,CSF1,PIK3C2B,SLC16A7,CIITA,EED,TOP1,ADAR,PHLDA1,BAZ1A,KYNU,TRIM5,HERC4,CCDC86,CDKN2AIP,NUB1,ZHX2,PML,SP110,OAS1Z,TRIM25,RAD1,NAMPT,ERAP2,PTPN2,GINS2,LOC616948,SOCS1,NMI,MAFF,TRIM21,SAMHD1,TFEC,BIRC3,FAS,LOC516599,TRIM34,SFMBT2,DDX3X,DR1,XRN2,GJA1,SRSF10,PIM1,TGIF1,RSL1D1,RERE,ARID5A,NOTCH2,NR2F1,MORC3,BRIX1,DDX21,RANBP2,KLF6,HIF1A,MED13,VPS…
GO:CC	organelle lumen	GO:0043233	5.28131e-38	37.2773	3587	1197	435	17622	IRF8,STAT3,STAT1,LOC781710,DTX3L,LAP3,OAS1X,PLAGL1,RBBP8,CSF1,PIK3C2B,SLC16A7,CIITA,EED,TOP1,ADAR,PHLDA1,BAZ1A,KYNU,TRIM5,HERC4,CCDC86,CDKN2AIP,NUB1,ZHX2,PML,SP110,OAS1Z,TRIM25,RAD1,NAMPT,ERAP2,PTPN2,GINS2,LOC616948,SOCS1,NMI,MAFF,TRIM21,SAMHD1,TFEC,BIRC3,FAS,LOC516599,TRIM34,SFMBT2,DDX3X,DR1,XRN2,GJA1,SRSF10,PIM1,TGIF1,RSL1D1,RERE,ARID5A,NOTCH2,NR2F1,MORC3,BRIX1,DDX21,RANBP2,KLF6,HIF1A,MED13,VPS…
GO:CC	membrane-enclosed lumen	GO:0031974	5.28131e-38	37.2773	3587	1197	435	17622	IRF8,STAT3,STAT1,LOC781710,DTX3L,LAP3,OAS1X,PLAGL1,RBBP8,CSF1,PIK3C2B,SLC16A7,CIITA,EED,TOP1,ADAR,PHLDA1,BAZ1A,KYNU,TRIM5,HERC4,CCDC86,CDKN2AIP,NUB1,ZHX2,PML,SP110,OAS1Z,TRIM25,RAD1,NAMPT,ERAP2,PTPN2,GINS2,LOC616948,SOCS1,NMI,MAFF,TRIM21,SAMHD1,TFEC,BIRC3,FAS,LOC516599,TRIM34,SFMBT2,DDX3X,DR1,XRN2,GJA1,SRSF10,PIM1,TGIF1,RSL1D1,RERE,ARID5A,NOTCH2,NR2F1,MORC3,BRIX1,DDX21,RANBP2,KLF6,HIF1A,MED13,VPS…
GO:CC	nucleoplasm	GO:0005654	9.34549e-37	36.0294	2935	1197	376	17622	IRF8,STAT3,STAT1,LOC781710,DTX3L,LAP3,OAS1X,PLAGL1,RBBP8,CSF1,PIK3C2B,SLC16A7,CIITA,EED,TOP1,ADAR,PHLDA1,KYNU,TRIM5,CCDC86,CDKN2AIP,NUB1,ZHX2,PML,SP110,OAS1Z,TRIM25,RAD1,NAMPT,PTPN2,GINS2,LOC616948,SOCS1,NMI,MAFF,TRIM21,SAMHD1,TFEC,BIRC3,FAS,LOC516599,TRIM34,SFMBT2,DDX3X,DR1,XRN2,GJA1,SRSF10,TGIF1,RERE,ARID5A,NOTCH2,NR2F1,MORC3,DDX21,RANBP2,KLF6,HIF1A,MED13,VPS54,CASP8,BCL3,RB1,FOS,ALAS1,RELT,WAS…
GO:CC	organelle	GO:0043226	4.94285e-36	35.306	10908	1197	943	17622	PARP14,IRF8,STAT3,STAT1,TAP1,LOC513659,LOC512486,GBP4,LOC781710,LOC507055,IRF1,DTX3L,SRRD,STAT2,MX1,LAP3,OAS1X,PLAGL1,RBBP8,LOC511531,CSF1,RNF19B,HPS4,PIK3C2B,LPIN2,SLC16A7,GBP5,PARP9,CIITA,EED,TOP1,ADAR,CASP7,PHLDA1,STRIP1,ZBP1,FERMT3,NOTCH1,BAZ1A,IRF9,LIMA1,MYPN,KYNU,TRIM5,CDADC1,LCK,UBA7,FNBP1,PSMB10,IFIT2,ERAP1,EXT1,HERC4,RAB27A,IFIT5,GKAP1,GRAMD2B,CCDC86,CDKN2AIP,NUB1,ZHX2,KIF15,PML,SP110,MA…
GO:CC	nucleus	GO:0005634	1.55047e-35	34.8095	5883	1197	608	17622	PARP14,IRF8,STAT3,STAT1,LOC781710,IRF1,DTX3L,SRRD,STAT2,MX1,LAP3,OAS1X,PLAGL1,RBBP8,CSF1,PIK3C2B,LPIN2,SLC16A7,PARP9,CIITA,EED,TOP1,ADAR,CASP7,PHLDA1,STRIP1,ZBP1,NOTCH1,BAZ1A,IRF9,KYNU,TRIM5,CDADC1,UBA7,PSMB10,HERC4,CCDC86,CDKN2AIP,NUB1,ZHX2,PML,SP110,MAF,VCPIP1,MAPK6,OAS1Z,TRIM25,RAD1,NAMPT,PTPN2,CREM,GINS2,LOC616948,SOCS1,ZNFX1,ZC3HAV1,NMI,MAFF,TRIM21,CMTR2,SP140L,SAMHD1,TFEC,BIRC3,SEH1L,FAS,LO…
GO:CC	cytoplasm	GO:0005737	2.72085e-21	20.5653	8891	1197	770	17622	PARP14,IRF8,STAT3,STAT1,TAP1,LOC513659,LOC512486,GBP4,LOC781710,LOC507055,IRF1,DTX3L,SRRD,STAT2,MX1,LAP3,SRGAP1,OAS1X,PLAGL1,LOC511531,DDX58,CSF1,RNF19B,HPS4,TIFA,PIK3C2B,LPIN2,GBP5,PARP9,PRKG1,CIITA,EED,TOP1,EIF2AK2,ADAR,CASP7,PHLDA1,STRIP1,PRKCH,ZBP1,NOTCH1,IRF9,LIMA1,MYPN,KYNU,TRIM5,CDADC1,LCK,PSMB9,UBA7,FNBP1,IFI44L,PSMB10,IFIT2,ERAP1,EXT1,HERC4,RAB27A,LGALS8,IFIT5,GKAP1,GRAMD2B,NUB1,ZHX2,KIF…
GO:CC	cytosol	GO:0005829	5.25371e-16	15.2795	2893	1197	311	17622	PARP14,STAT3,STAT1,LOC781710,DTX3L,MX1,LAP3,OAS1X,RNF19B,HPS4,PIK3C2B,LPIN2,CIITA,EED,EIF2AK2,CASP7,STRIP1,PRKCH,ZBP1,IRF9,LIMA1,KYNU,TRIM5,LCK,PSMB9,IFIT2,HERC4,LGALS8,IFIT5,NUB1,ZHX2,PML,MAPK6,OAS1Z,TRIM25,KANK4,CRLF3,PTPN2,LOC616948,ZC3HAV1,NMI,TRIM21,SNX16,BIRC3,FAS,SDS,LOC516599,TRIM34,GIMAP7,SFMBT2,RIPK1,MAN1A1,PMAIP1,TES,DDX3X,MAP3K8,CGAS,RNF31,KLHL3,PIM1,PPP2R5B,LOC100139670,NR2F1,USP18,D…
GO:CC	nucleolus	GO:0005730	1.84867e-14	13.7331	730	1197	113	17622	STAT1,TOP1,ADAR,PHLDA1,HERC4,CCDC86,CDKN2AIP,NUB1,PML,XRN2,PIM1,RSL1D1,ARID5A,BRIX1,DDX21,KLF6,NOL9,SCAF11,VMP1,UTP15,ACSL5,BCL6,SDAD1,WDR75,DCLRE1A,FMR1,WDR43,SDHAF2,RRN3,NMD3,PHF6,MAK16,RPF2,MOB1A,ORC4,PARP3,EZR,COX7A2L,KRR1,NOP58,NOL11,ISG20,TSG101,POLR2K,NBN,C1D,ZBTB33,MDM2,LIPA,NOC3L,DUSP11,UCHL5,RBM28,SBDS,ZNF207,TTF1,XPO1,XPC,ETV6,LEO1,WDR12,DDX5,PLRG1,MCM10,ELL3,AEN,INTS4,ACIN1,ARL14EP,PP…
GO:CC	endomembrane system	GO:0012505	2.39008e-10	9.62159	2846	1197	285	17622	TAP1,LOC781710,DTX3L,MX1,PLAGL1,RNF19B,HPS4,LPIN2,GBP5,NOTCH1,IFIT2,ERAP1,EXT1,RAB27A,GKAP1,PML,LOC618733,CD46,ERAP2,PTPN2,LOC100298356,SNX16,LOC112441507,SEH1L,TAPBPL,CSNK1E,MAN1A1,CMTM6,NAPEPLD,TPST2,MMD,DRAM2,LAMP3,GJA1,ADPGK,FAM241A,ATP9A,TNF,TAPBP,TLR4,NUCB1,F2R,RANBP2,RTN4,USP25,PICALM,CERS5,VPS54,STX11,CD164,FOS,WASHC4,MAP2K1,VPS36,IFI47,CTSS,TMEM41B,GRAMD1C,VMP1,PPP2R3C,FNDC3A,MIA3,RHOU,C…
GO:CC	chromosome	GO:0005694	1.26758e-09	8.89702	995	1197	126	17622	STAT3,STAT1,IRF1,RBBP8,TOP1,BAZ1A,CCDC86,PML,RAD1,GINS2,SAMHD1,SEH1L,CGAS,RSL1D1,BRIX1,DDX21,HIF1A,RB1,HDAC1,KIF2C,NUP107,PRPF19,BCL6,IRF4,GTF2B,HMGN4,NAP1L1,SMC5,FMR1,SINHCAF,NUP160,WDR43,PCGF5,USF1,XPA,RNF138,RPF2,CITED2,ORC4,CPSF6,PARP3,KRR1,RMI1,ZGRF1,MYCL,EGR1,NBN,RAD50,FBH1,PPP1CB,KIF18A,MAX,STAG2,UCHL5,SLF1,ZNF207,RIF1,UBR2,XPO1,POLE2,XPC,CTC1,SMCHD1,AKIRIN1,DHX36,POLD3,PLRG1,AHCTF1,MCM10,…
GO:CC	nuclear body	GO:0016604	5.13015e-09	8.28987	625	1197	89	17622	PLAGL1,CSF1,PML,TRIM25,NAMPT,FAS,SFMBT2,SRSF10,MORC3,HIF1A,RB1,SCAF11,YME1L1,PPP1R16B,HDAC4,EYA1,PRPF19,ELF2,SGK1,GTF2B,NAA15,SMC5,RMI2,SRSF1,SRSF6,NUDT9,ARHGAP18,YARS2,CALCOCO2,SRSF3,BCLAF1,NUFIP2,CPSF6,MRPL44,PARP3,RMI1,ERBIN,NOP58,ISG20,SF3B1,HAUS6,NBN,CDC40,BASP1,NOC3L,DUSP11,SRRM1,RIF1,RBM39,POLE2,PAPOLG,SRSF11,PPP4R3B,DHX36,PLRG1,ELL3,SMC4,PPP4R3A,RBM25,DAXX,PRPF40A,CDK12,NR3C1,PCNP,MTDH,SR…
GO:CC	nuclear protein-containing complex	GO:0140513	7.81047e-09	8.10732	1077	1197	131	17622	STAT3,EED,ADAR,BAZ1A,RAD1,GINS2,ZNFX1,SEH1L,DR1,RERE,RANBP2,HIF1A,MED13,RB1,FOS,HDAC1,HDAC4,NUP107,PRPF19,LARP7,JARID2,BCL9L,MX2,GTF2B,SUPT4H1,SINHCAF,NUP160,MYEF2,SRSF1,PCGF5,XPA,TXNL4B,BCLAF1,DIS3,MTREX,ORC4,PTGES3,CPSF6,CDK19,NOL11,SF3B1,CSTF1,POLR2K,NBN,RAD50,CDC40,RBM17,R3HCC1L,PRPF38B,MAX,GTF2H1,BASP1,UCHL5,SRRM1,CCNT1,THOC2,RFX5,ASXL1,POLE2,TRA2B,XPC,CTC1,LEO1,HNRNPR,WDR12,POLD3,DDX5,INTS2…
GO:CC	intracellular non-membrane-bounded organelle	GO:0043232	7.62903e-08	7.11753	3776	1197	345	17622	STAT3,STAT1,TAP1,IRF1,RBBP8,TOP1,ADAR,PHLDA1,FERMT3,BAZ1A,LIMA1,MYPN,LCK,FNBP1,HERC4,IFIT5,GRAMD2B,CCDC86,CDKN2AIP,NUB1,KIF15,PML,MAPK6,TRIM25,KANK4,RAD1,GINS2,SOCS1,TRIM21,SAMHD1,SEH1L,BMF,SLC1A4,PJA2,JAKMIP3,DDX3X,XRN2,CGAS,KLHL3,PIM1,RSL1D1,TDRD7,ARID5A,BRIX1,DDX21,RELL1,CRK,KLF6,DDX6,HIF1A,SCIN,NOL9,RB1,MYOM1,HDAC1,KIF2C,CYLD,SCAF11,VMP1,PPP2R3C,RHOU,HDAC4,ELAC2,NUP107,TMOD3,PRPF19,UTP15,PSMD…
GO:CC	non-membrane-bounded organelle	GO:0043228	7.88447e-08	7.10323	3777	1197	345	17622	STAT3,STAT1,TAP1,IRF1,RBBP8,TOP1,ADAR,PHLDA1,FERMT3,BAZ1A,LIMA1,MYPN,LCK,FNBP1,HERC4,IFIT5,GRAMD2B,CCDC86,CDKN2AIP,NUB1,KIF15,PML,MAPK6,TRIM25,KANK4,RAD1,GINS2,SOCS1,TRIM21,SAMHD1,SEH1L,BMF,SLC1A4,PJA2,JAKMIP3,DDX3X,XRN2,CGAS,KLHL3,PIM1,RSL1D1,TDRD7,ARID5A,BRIX1,DDX21,RELL1,CRK,KLF6,DDX6,HIF1A,SCIN,NOL9,RB1,MYOM1,HDAC1,KIF2C,CYLD,SCAF11,VMP1,PPP2R3C,RHOU,HDAC4,ELAC2,NUP107,TMOD3,PRPF19,UTP15,PSMD…
GO:CC	catalytic complex	GO:1902494	1.15432e-07	6.93767	1235	1197	141	17622	RNF19B,PIK3C2B,EED,PSMB9,PSMB10,IFIT5,PSME2,SOCS1,ZNFX1,TRIM21,PSMB8,RIPK1,DR1,RNF31,KLHL3,RERE,PPP2R5B,CASP8,PSMA2,RB1,PNPT1,HDAC1,UBR1,PSME1,HDAC4,PRPF19,PSMD10,ABAT,JARID2,CFLAR,ZYG11B,GTF2B,NAA15,PRKAB2,ZFP36,SPTSSA,SMC5,SINHCAF,SPTLC2,NAA50,PPP4R2,SRSF1,ND5,RABGGTA,DIS3,MTREX,ND4,SNX4,RNF19A,TNFAIP1,RBCK1,SF3B1,CYB5B,POLR2K,PIK3CA,PSMA3,FBH1,PPP1CB,CDC40,MAX,GTF2H1,NUS1,UCHL5,SRRM1,CCNT1,UBE…
GO:CC	protein-containing complex	GO:0032991	1.97028e-07	6.70547	4734	1197	414	17622	STAT3,STAT1,TAP1,DTX3L,RBBP8,B2M,CSF1,RNF19B,HPS4,PIK3C2B,EED,TOP1,ADAR,NT5DC3,NOTCH1,BAZ1A,PSMB9,PSMB10,IFIT5,KIF15,MAPK6,LOC618733,RAD1,GINS2,PSME2,SOCS1,ZNFX1,TRIM21,PSMB8,SEH1L,FAS,BMF,CSNK1E,RIPK1,TES,DDX3X,DR1,GJA1,RNF31,KLHL3,RSL1D1,RERE,PPP2R5B,ARID5A,TAPBP,NOTCH2,RUNX1,TLR4,ANO6,RANBP2,CRK,PICALM,DDX6,STK3,HIF1A,CACNA1A,MED13,VPS54,CASP8,BCL3,PSMA2,RB1,FOS,WASHC4,PNPT1,WDR24,HDAC1,VPS36,…
GO:CC	chromosomal region	GO:0098687	4.31254e-05	4.36527	224	1197	38	17622	PML,SEH1L,KIF2C,NUP107,SMC5,FMR1,NUP160,ORC4,NBN,PPP1CB,KIF18A,ZNF207,RIF1,XPO1,CTC1,SMCHD1,DHX36,SMC4,DYNC1LI1,PPP1CC,DAXX,ZWILCH,HELLS,ORC2,NDC80,CENPK,CHEK1,ESCO2,BUB1B,PPP2CA,POLR2B,ZNF276,CBX3,LRIF1,SPC25,SMC6,SGO2,NSMCE2
GO:CC	cytoplasmic stress granule	GO:0010494	5.09993e-05	4.29244	58	1197	17	17622	TRIM25,DDX3X,DDX6,LARP4,ZFP36,FMR1,ELAVL1,CAPRIN1,NUFIP2,EIF2S1,ZFAND1,RC3H2,DHX36,EIF4E,KPNB1,CELF1,RC3H1
GO:CC	site of double-strand break	GO:0035861	0.000131464	3.88119	55	1197	16	17622	RBBP8,SAMHD1,CGAS,PRPF19,SMC5,RNF138,PARP3,ZGRF1,NBN,SLF1,RIF1,SMCHD1,ESCO2,ATF2,SMC6,SLF2
GO:CC	nuclear speck	GO:0016607	0.000226099	3.6457	306	1197	45	17622	NAMPT,SFMBT2,SRSF10,HIF1A,PPP1R16B,HDAC4,PRPF19,SGK1,SMC5,RMI2,SRSF1,SRSF6,ARHGAP18,SRSF3,BCLAF1,CPSF6,ERBIN,SF3B1,HAUS6,CDC40,NOC3L,DUSP11,SRRM1,RBM39,SRSF11,PPP4R3B,DHX36,PLRG1,ELL3,SMC4,PPP4R3A,RBM25,PRPF40A,CDK12,NR3C1,SRPK1,SREK1,CCNL1,CNOT7,TRIP11,SRRM2,CDC5L,CBLL1,ZNF217,DDX17
GO:CC	site of DNA damage	GO:0090734	0.000380009	3.42021	73	1197	18	17622	RBBP8,SAMHD1,CGAS,PRPF19,SMC5,RNF138,PARP3,ZGRF1,NBN,SLF1,RIF1,XPC,SMCHD1,ESCO2,ATF2,SMC6,CUL5,SLF2
GO:CC	nuclear chromosome	GO:0000228	0.00047849	3.32013	172	1197	30	17622	TOP1,BAZ1A,RAD1,GINS2,HDAC1,PRPF19,SINHCAF,XPA,ORC4,CPSF6,RAD50,UCHL5,POLE2,SMCHD1,POLD3,PLRG1,MCM10,TIMELESS,AGO3,ORC2,MMS22L,CHEK1,SMC2,ANP32E,NIFK,LRIF1,CDC5L,NUFIP1,ACTR6,ACTR8
GO:CC	endoplasmic reticulum	GO:0005783	0.000686776	3.16318	1129	1197	117	17622	TAP1,RNF19B,LPIN2,NOTCH1,IFIT2,ERAP1,EXT1,PML,LOC618733,ERAP2,PTPN2,TAPBPL,MAN1A1,TPST2,GJA1,ADPGK,TAPBP,RTN4,USP25,CERS5,FOS,MAP2K1,IFI47,TMEM41B,GRAMD1C,VMP1,MIA3,MSMO1,UTP15,TMEM33,ACSL5,SPTSSA,PANX1,SPTLC2,EXTL2,LNPK,TMED2,SEC24B,DERL1,ELAVL1,SERP1,MINPP1,BCL2,PGS1,SC5D,TRAM1,OSBPL6,HMGCR,CYB5B,BFAR,LPCAT2,NDFIP2,YTHDC2,HM13,LOC615733,NUS1,SLC30A9,TFG,HSD17B12,ARSG,TPD52,TMEM170A,UBQLN1,TMEM3…
GO:CC	organelle subcompartment	GO:0031984	0.0015243	2.81693	932	1197	99	17622	TAP1,LPIN2,ERAP1,EXT1,PML,LOC618733,CSNK1E,MAN1A1,ATP9A,TAPBP,RTN4,CERS5,VPS54,IFI47,TMEM41B,GRAMD1C,VMP1,MIA3,RHOU,CHSY1,SCOC,MSMO1,RAB14,TMEM33,RIC1,SPTSSA,SPTLC2,EXTL2,LNPK,PMEPA1,TMED2,SEC24B,DERL1,BCL2,SC5D,B4GALT4,B3GNT2,ZDHHC20,TRAM1,OSBPL6,HMGCR,SNAP25,ARL5B,LPCAT2,TBC1D23,HM13,NUS1,HS2ST1,MGAT2,HSD17B12,FAM91A1,TMEM165,GCC2,SLC35A3,TMEM170A,ARFIP1,ATP6AP2,TMCO1,RAB32,TMEM87A,UBA5,VRK1,SE…
GO:CC	cytoplasmic ribonucleoprotein granule	GO:0036464	0.00157794	2.80191	182	1197	30	17622	TOP1,TRIM25,SOCS1,TRIM21,DDX3X,DDX6,LARP4,ZFP36,FMR1,BTBD1,ELAVL1,CAPRIN1,NUFIP2,EIF2S1,ZFAND1,DCPS,RC3H2,DHX36,EIF4E,NBDY,USP3,PSMA4,ROCK2,AGO3,APOBEC3H,KPNB1,GABPB1,CNOT7,CELF1,RC3H1
GO:CC	ribonucleoprotein granule	GO:0035770	0.00191419	2.71801	193	1197	31	17622	TOP1,TRIM25,SOCS1,TRIM21,DDX3X,TDRD7,DDX6,LARP4,ZFP36,FMR1,BTBD1,ELAVL1,CAPRIN1,NUFIP2,EIF2S1,ZFAND1,DCPS,RC3H2,DHX36,EIF4E,NBDY,USP3,PSMA4,ROCK2,AGO3,APOBEC3H,KPNB1,GABPB1,CNOT7,CELF1,RC3H1
GO:CC	MHC protein complex	GO:0042611	0.00506373	2.29553	19	1197	8	17622	B2M,BOLA-DMA,BOLA-DMB,LOC100848815,BOLA-DRA,BOLA-DRB3,BOLA-DRB2,DSB
GO:CC	transferase complex	GO:1990234	0.0051728	2.28627	688	1197	76	17622	RNF19B,PIK3C2B,EED,IFIT5,SOCS1,ZNFX1,TRIM21,DR1,RNF31,KLHL3,RB1,UBR1,ABAT,JARID2,ZYG11B,GTF2B,NAA15,PRKAB2,SPTSSA,SMC5,SPTLC2,NAA50,RABGGTA,RNF19A,TNFAIP1,RBCK1,POLR2K,PIK3CA,FBH1,MAX,GTF2H1,NUS1,CCNT1,UBE2V2,NAA30,UBR2,POLE2,HSD17B12,LEO1,PRMT1,RCHY1,POLD3,CDC27,YEATS4,AEBP2,RNF11,TAF2,GTF2A1,CCNT2,MRGBP,CDK12,DCUN1D1,CUL4B,CAND1,DET1,CTR9,GTF2H3,SUZ12,NAA25,POLR2B,ATF2,CHML,MAGT1,CDK1,UBE2D1,CB…
GO:CC	chromosome, centromeric region	GO:0000775	0.0068703	2.16302	149	1197	25	17622	SEH1L,KIF2C,NUP107,SMC5,FMR1,NUP160,KIF18A,ZNF207,XPO1,SMC4,DYNC1LI1,DAXX,ZWILCH,HELLS,ORC2,NDC80,CENPK,ESCO2,BUB1B,PPP2CA,ZNF276,CBX3,SPC25,SMC6,SGO2
GO:CC	intracellular protein-containing complex	GO:0140535	0.00843962	2.07368	663	1197	73	17622	RNF19B,PSMB9,PSMB10,PSME2,ZNFX1,TRIM21,PSMB8,DR1,RNF31,KLHL3,PPP2R5B,BCL3,PSMA2,UBR1,PSME1,PSMD10,ABAT,RIC1,ZYG11B,GTF2B,NAA15,PRKAB2,ZFP36,NAA50,PPP4R2,RNF19A,TNFAIP1,RBCK1,POLR2K,PSMA3,FBH1,GTF2H1,UBE2V2,PPP2R3A,NAA30,UBR2,POLE2,PPP4R3B,LEO1,RCHY1,POLD3,EIF4E,CDC27,YEATS4,RNF11,TAF2,GTF2A1,TRAPPC2,PSMA4,XRCC6,MRGBP,DCUN1D1,CUL4B,FAM98B,CAND1,DET1,CTR9,CNOT7,PSMD12,GTF2H3,PPP2CA,NAA25,POLR2B,ATF…
GO:CC	Golgi apparatus	GO:0005794	0.0165642	1.78083	1025	1197	102	17622	LOC781710,PLAGL1,GBP5,EXT1,GKAP1,LOC100298356,LOC112441507,CSNK1E,MAN1A1,NAPEPLD,MMD,DRAM2,FAM241A,ATP9A,TAPBP,TLR4,NUCB1,VPS54,STX11,PPP2R3C,FNDC3A,RHOU,CHSY1,SCOC,RAB14,CLCN3,BCL6,RIC1,PMEPA1,TMED2,PCGF5,RAB12,G2E3,AP1AR,B4GALT4,B3GNT2,COPB1,ZDHHC20,SNAP25,ARL5B,LPCAT2,NDFIP2,ZDHHC21,TBC1D23,SLC30A7,HS2ST1,MGAT2,RAB33B,FAM91A1,TMEM165,GCC2,SLC35A3,ABO,ARFIP1,RAB32,TMEM87A,GOPC,VRK1,SPP1,VPS45,M…
GO:CC	MHC class II protein complex	GO:0042613	0.0207145	1.68373	17	1197	7	17622	BOLA-DMA,BOLA-DMB,LOC100848815,BOLA-DRA,BOLA-DRB3,BOLA-DRB2,DSB
GO:CC	endoplasmic reticulum subcompartment	GO:0098827	0.0251317	1.59978	546	1197	61	17622	TAP1,LPIN2,ERAP1,EXT1,PML,LOC618733,TAPBP,RTN4,CERS5,IFI47,TMEM41B,GRAMD1C,VMP1,MIA3,MSMO1,TMEM33,SPTSSA,SPTLC2,EXTL2,LNPK,TMED2,SEC24B,DERL1,BCL2,SC5D,TRAM1,OSBPL6,HMGCR,LPCAT2,HM13,NUS1,HSD17B12,TMEM170A,ATP6AP2,TMCO1,UBA5,SEC62,TMX3,ATG2A,ORMDL1,SQLE,SRD5A3,ASPH,MTDH,KPNB1,CEPT1,CANX,MYRF,SPPL2A,SPCS2,SLC37A3,MAGT1,ATF6,ITPR2,PIGH,HACD2,MR1,RAB21,RETREG1,ABCD4,VKORC1L1
GO:CC	death-inducing signaling complex	GO:0031264	0.0298241	1.52543	5	1197	4	17622	FAS,RIPK1,CASP8,CFLAR
GO:CC	nuclear outer membrane-endoplasmic reticulum membrane network	GO:0042175	0.035958	1.4442	553	1197	61	17622	TAP1,LPIN2,ERAP1,EXT1,PML,LOC618733,TAPBP,RANBP2,RTN4,CERS5,IFI47,TMEM41B,GRAMD1C,VMP1,MIA3,MSMO1,TMEM33,SPTSSA,SPTLC2,EXTL2,LNPK,TMED2,SEC24B,DERL1,BCL2,SC5D,TRAM1,OSBPL6,HMGCR,LPCAT2,HM13,NUS1,XPO1,HSD17B12,TMEM170A,ATP6AP2,TMCO1,UBA5,SEC62,TMX3,ATG2A,ORMDL1,SQLE,SRD5A3,MTDH,CEPT1,CANX,MYRF,SPPL2A,SPCS2,SLC37A3,MAGT1,ATF6,ITPR2,PIGH,HACD2,MR1,RAB21,RETREG1,ABCD4,VKORC1L1
GO:CC	chromosome, telomeric region	GO:0000781	0.0376504	1.42423	83	1197	16	17622	PML,SMC5,ORC4,NBN,PPP1CB,RIF1,CTC1,SMCHD1,DHX36,PPP1CC,ORC2,CHEK1,POLR2B,LRIF1,SMC6,NSMCE2
GO:CC	condensed chromosome	GO:0000793	0.0440667	1.35589	186	1197	27	17622	RAD1,SEH1L,KIF2C,NUP107,SMC5,NUP160,RAD50,KIF18A,STAG2,ZNF207,RIF1,XPO1,DYNC1LI1,ZWILCH,AGO3,ORC2,NDC80,CHEK1,BUB1B,SMC2,NIFK,ZNF276,CBX3,SPC25,SMC6,SGO2,NSMCE2
KEGG	Influenza A	KEGG:05164	8.47521e-12	11.0718	171	624	45	8108	STAT1,ICAM1,STAT2,MX1,OAS1X,DDX58,CIITA,EIF2AK2,ADAR,IRF9,PML,OAS1Z,TRIM25,IFIH1,FAS,SOCS3,TNF,IFNAR2,TLR4,RNASEL,CASP8,IRF3,MAP2K1,NXT2,OAS1Y,MX2,TNFSF10,CALCOCO2,TBK1,EIF2S1,IRAK4,PIK3CA,BOLA-DMA,BOLA-DMB,LOC100848815,XPO1,JAK2,BOLA-DRA,BOLA-DRB3,IRF7,BOLA-DRB2,KPNA1,IFNAR1,DSB,CYCS
KEGG	Epstein-Barr virus infection	KEGG:05169	1.98464e-10	9.70232	214	624	49	8108	STAT3,STAT1,TAP1,ICAM1,STAT2,OAS1X,B2M,DDX58,EIF2AK2,IRF9,LOC512672,OAS1Z,LOC618733,FAS,RIPK1,TNF,TAPBP,IFNAR2,CASP8,RB1,ENTPD1,IRF3,HDAC1,ISG15,GADD45B,OAS1Y,BCL2,BOLA-NC1,RBPJ,TBK1,MYC,IRAK4,PIK3CA,MDM2,BOLA-DMA,BOLA-DMB,LOC100848815,BOLA-DRA,MAP2K6,BOLA,BOLA-DRB3,IRF7,CD44,JSP.1,BOLA-DRB2,PSMD12,IFNAR1,DSB,CYCS
KEGG	Herpes simplex virus 1 infection	KEGG:05168	2.62292e-10	9.58122	299	624	60	8108	STAT1,TAP1,STAT2,OAS1X,B2M,DDX58,EIF2AK2,IRF9,LOC512672,PML,OAS1Z,LOC618733,LOC100298356,IFIH1,LOC112441507,BIRC3,FAS,SOCS3,CGAS,TNF,TAPBP,IFNAR2,RNASEL,CASP8,IRF3,OAS1Y,SRSF1,SRSF6,SRSF3,BCL2,BOLA-NC1,TBK1,SRSF7,EIF2S1,IRAK4,PIK3CA,PPP1CB,BOLA-DMA,BOLA-DMB,LOC100848815,ZNF3,JAK2,BOLA-DRA,ZNF283,PPP1CC,DAXX,BIRC2,BOLA,BOLA-DRB3,IRF7,ZNF565,JSP.1,SRPK1,LOC100299712,LTA,BOLA-DRB2,IFNAR1,DSB,CYCS,LO…
KEGG	NOD-like receptor signaling pathway	KEGG:04621	4.53903e-08	7.34304	171	624	39	8108	STAT1,LOC512486,LOC781710,LOC507055,STAT2,OAS1X,LOC511531,GBP5,IFI16,IRF9,OAS1Z,NAMPT,BIRC3,CASP4,RIPK1,RNF31,TNF,IFNAR2,GABARAPL1,TLR4,RNASEL,CASP8,IRF3,TXNIP,TRPV2,OAS1Y,PANX1,BCL2,TBK1,ERBIN,RBCK1,IRAK4,BIRC2,TRPM7,IRF7,DNM1L,IFNAR1,HSP90AA1,ITPR2
KEGG	Human immunodeficiency virus 1 infection	KEGG:05170	1.84863e-07	6.73315	217	624	44	8108	TAP1,B2M,LOC512672,LOC618733,LOC616948,LOC100298356,SAMHD1,LOC112441507,FAS,LOC516599,RIPK1,CGAS,TNF,TAPBP,TLR4,CRK,CASP8,FOS,IRF3,MAP2K1,TNFRSF1B,BCL2,BOLA-NC1,TBK1,IRAK4,PIK3CA,KRAS,PAK2,ATM,MAP2K6,BOLA,JSP.1,APOBEC3H,CUL4B,NRAS,CHEK1,CDK1,ITPR2,PPP3CB,CYCS,LOC618737,CUL5,AP1S3,GNAQ
KEGG	Antigen processing and presentation	KEGG:04612	1.14334e-06	5.94183	78	624	23	8108	TAP1,B2M,CIITA,LOC512672,LOC618733,PSME2,TNF,TAPBP,CTSS,PSME1,BOLA-NC1,BOLA-DMA,BOLA-DMB,RFX5,LOC100848815,BOLA-DRA,BOLA,BOLA-DRB3,JSP.1,CANX,BOLA-DRB2,HSP90AA1,DSB
KEGG	Hepatitis C	KEGG:05160	2.12155e-06	5.67335	156	624	34	8108	STAT3,STAT1,STAT2,MX1,OAS1X,DDX58,EIF2AK2,IRF9,OAS1Z,FAS,SOCS3,RIPK1,TNF,LOC100139670,IFNAR2,RNASEL,CASP8,RB1,IRF3,MAP2K1,OAS1Y,CFLAR,MX2,TBK1,YWHAG,EIF2S1,MYC,PIK3CA,KRAS,IRF7,NRAS,IFNAR1,PPP2CA,CYCS
KEGG	Measles	KEGG:05162	8.74019e-06	5.05848	142	624	31	8108	STAT3,STAT1,STAT2,MX1,OAS1X,DDX58,EIF2AK2,ADAR,IRF9,OAS1Z,CD46,IFIH1,FAS,IL2RA,IFNAR2,TLR4,CASP8,FOS,IRF3,OAS1Y,MX2,FCGR2B,BCL2,TBK1,EIF2S1,IRAK4,PIK3CA,RCHY1,IRF7,IFNAR1,CYCS
KEGG	Kaposi sarcoma-associated herpesvirus infection	KEGG:05167	3.94748e-05	4.40368	199	624	37	8108	STAT3,STAT1,ICAM1,STAT2,EIF2AK2,IRF9,LOC512672,FAS,IFNAR2,GABARAPL1,HIF1A,CLEC2B,CASP8,RB1,FOS,IRF3,MAP2K1,IL6ST,VEGFA,ZFP36,BOLA-NC1,TBK1,MYC,PIK3CA,UBB,KRAS,JAK2,MAP2K6,BOLA,IRF7,JSP.1,NRAS,LOC529196,IFNAR1,ITPR2,PPP3CB,CYCS
KEGG	Human T-cell leukemia virus 1 infection	KEGG:05166	7.73333e-05	4.11163	221	624	39	8108	ICAM1,B2M,LCK,LOC512672,IL15RA,TNF,MAP3K1,IL2RA,RB1,FOS,MAP2K1,ZFP36,PTEN,BOLA-NC1,MYC,EGR1,PIK3CA,BOLA-DMA,BOLA-DMB,KRAS,LOC100848815,XPO1,ADCY3,ATM,CDC27,BOLA-DRA,BOLA,BOLA-DRB3,JSP.1,NRAS,CANX,CHEK1,LTA,BUB1B,BOLA-DRB2,ATF2,DSB,SMAD4,PPP3CB
KEGG	Necroptosis	KEGG:04217	0.000105704	3.97591	150	624	30	8108	STAT3,STAT1,STAT2,EIF2AK2,ZBP1,IRF9,BIRC3,FAS,RIPK1,RNF31,TNF,IFNAR2,TLR4,STAT4,CASP8,CYLD,CFLAR,TNFSF10,BCL2,RBCK1,SMPD1,TICAM2,CHMP2B,JAK2,BIRC2,TRPM7,DNM1L,IFNAR1,HSP90AA1,PPID
KEGG	Hepatitis B	KEGG:05161	0.000216945	3.66365	163	624	31	8108	STAT3,STAT1,STAT2,DDX58,IFIH1,FAS,DDX3X,TNF,MAP3K1,TLR4,STAT4,CASP8,RB1,FOS,IRF3,MAP2K1,BCL2,TBK1,MYC,IRAK4,PIK3CA,TICAM2,KRAS,JAK2,MAP2K6,IRF7,NRAS,IFNAR1,ATF2,SMAD4,CYCS
KEGG	TNF signaling pathway	KEGG:04668	0.000338826	3.47002	119	624	25	8108	ICAM1,IRF1,CSF1,CASP7,BIRC3,FAS,SOCS3,RIPK1,MAP3K8,TNF,CASP8,BCL3,FOS,MAP2K1,IFI47,TNFRSF1B,CFLAR,PIK3CA,BIRC2,MAP2K6,JUNB,LTA,DNM1L,ITCH,ATF2
KEGG	mRNA surveillance pathway	KEGG:03015	0.000959303	3.01804	88	624	20	8108	PPP2R5B,PPP2R3C,NXT2,RNGTT,CPSF6,PAPOLA,CSTF1,PPP1CB,ETF1,SRRM1,PPP2R3A,PAPOLG,GSPT1,ACIN1,PPP1CC,CPSF2,CSTF2T,PPP2CA,PCF11,PELO
KEGG	Type I diabetes mellitus	KEGG:04940	0.000986078	3.00609	54	624	15	8108	LOC512672,FAS,TNF,BOLA-NC1,BOLA-DMA,BOLA-DMB,LOC100848815,BOLA-DRA,BOLA,BOLA-DRB3,JSP.1,LTA,BOLA-DRB2,HSPD1,DSB
KEGG	Apoptosis	KEGG:04210	0.00227552	2.64292	140	624	26	8108	CASP7,BIRC3,FAS,RIPK1,PMAIP1,TNF,CASP8,FOS,MAP2K1,CTSS,MCL1,GADD45B,CFLAR,TNFSF10,BCL2,PARP3,EIF2S1,PIK3CA,KRAS,ATM,DAXX,BIRC2,NRAS,ITPR2,DFFB,CYCS
KEGG	Ubiquitin mediated proteolysis	KEGG:04120	0.00429552	2.36698	145	624	26	8108	UBA7,HERC4,PML,SOCS1,BIRC3,SOCS3,MAP3K1,PRPF19,UBE2D3,MDM2,UBE2W,UBB,NEDD4L,RCHY1,UBA6,CDC27,BIRC2,UBA2,CUL4B,DET1,ITCH,FANCL,UBE2Q2,UBE2D1,CUL2,CUL5
KEGG	Allograft rejection	KEGG:05330	0.00841178	2.07511	50	624	13	8108	LOC512672,FAS,TNF,BOLA-NC1,BOLA-DMA,BOLA-DMB,LOC100848815,BOLA-DRA,BOLA,BOLA-DRB3,JSP.1,BOLA-DRB2,DSB
KEGG	Th17 cell differentiation	KEGG:04659	0.00935051	2.02916	110	624	21	8108	STAT3,STAT1,LCK,IL2RA,RUNX1,HIF1A,FOS,IL6ST,TBX21,IRF4,BOLA-DMA,BOLA-DMB,LOC100848815,JAK2,BOLA-DRA,BOLA-DRB3,BOLA-DRB2,HSP90AA1,DSB,SMAD4,PPP3CB
KEGG	Th1 and Th2 cell differentiation	KEGG:04658	0.0105768	1.97565	95	624	19	8108	STAT1,NOTCH1,LCK,MAF,IL2RA,NOTCH2,STAT4,FOS,TBX21,RBPJ,BOLA-DMA,BOLA-DMB,LOC100848815,JAK2,BOLA-DRA,BOLA-DRB3,BOLA-DRB2,DSB,PPP3CB
KEGG	Toxoplasmosis	KEGG:05145	0.0107189	1.96985	111	624	21	8108	STAT3,STAT1,CIITA,SOCS1,BIRC3,TNF,TLR4,CASP8,BCL2,IRAK4,BOLA-DMA,BOLA-DMB,LOC100848815,JAK2,BOLA-DRA,BIRC2,MAP2K6,BOLA-DRB3,BOLA-DRB2,DSB,CYCS
KEGG	Cellular senescence	KEGG:04218	0.0109999	1.95861	153	624	26	8108	LOC512672,RAD1,RB1,MAP2K1,GADD45B,PTEN,BOLA-NC1,MYC,NBN,PIK3CA,RAD50,PPP1CB,MDM2,KRAS,ATM,PPP1CC,MAP2K6,BOLA,TRPM7,JSP.1,NRAS,CHEK1,CDK1,ITPR2,PPP3CB,PPID
KEGG	Human cytomegalovirus infection	KEGG:05163	0.0127051	1.89602	226	624	34	8108	STAT3,TAP1,B2M,LOC512672,LOC618733,FAS,RIPK1,CGAS,TNF,TAPBP,CRK,CASP8,RB1,IRF3,MAP2K1,VEGFA,BOLA-NC1,TBK1,MYC,PIK3CA,MDM2,KRAS,ADCY3,MAP2K6,BOLA,ROCK2,JSP.1,NRAS,LOC529196,ATF2,ITPR2,PPP3CB,CYCS,GNAQ
KEGG	PD-L1 expression and PD-1 checkpoint pathway in cancer	KEGG:05235	0.01385	1.85855	89	624	18	8108	STAT3,STAT1,LCK,CD274,BATF2,TLR4,HIF1A,FOS,MAP2K1,PTEN,PIK3CA,TICAM2,KRAS,JAK2,MAP2K6,NRAS,EML4,PPP3CB
KEGG	Viral carcinogenesis	KEGG:05203	0.0145504	1.83712	200	624	31	8108	STAT3,EIF2AK2,IRF9,LOC512672,PMAIP1,DDX3X,SCIN,CASP8,RB1,IRF3,HDAC1,IL6ST,HDAC4,GTF2B,BOLA-NC1,RBPJ,YWHAG,PIK3CA,MDM2,GTF2H1,KRAS,GTF2A1,BOLA,IRF7,JSP.1,NRAS,CHEK1,HDAC7,GTF2H3,ATF2,CDK1
KEGG	Leishmaniasis	KEGG:05140	0.0170136	1.7692	75	624	16	8108	STAT1,FCGR2A,FCGR3A,TNF,TLR4,FOS,FCGR1A,IRAK4,BOLA-DMA,BOLA-DMB,LOC100848815,JAK2,BOLA-DRA,BOLA-DRB3,BOLA-DRB2,DSB
KEGG	Osteoclast differentiation	KEGG:04380	0.0174618	1.75791	123	624	22	8108	STAT1,STAT2,CSF1,FCGR2A,IRF9,LCK,FCGR3A,SOCS1,SOCS3,GAB2,TNF,IFNAR2,FOS,MAP2K1,CYLD,FCGR2B,FCGR1A,PIK3CA,MAP2K6,JUNB,IFNAR1,PPP3CB
KEGG	Viral myocarditis	KEGG:05416	0.0218396	1.66075	69	624	15	8108	ICAM1,LOC512672,CASP8,BOLA-NC1,BOLA-DMA,BOLA-DMB,LOC100848815,EIF4G3,BOLA-DRA,BOLA,BOLA-DRB3,JSP.1,BOLA-DRB2,DSB,CYCS
KEGG	Graft-versus-host disease	KEGG:05332	0.029151	1.53535	56	624	13	8108	LOC512672,FAS,TNF,BOLA-NC1,BOLA-DMA,BOLA-DMB,LOC100848815,BOLA-DRA,BOLA,BOLA-DRB3,JSP.1,BOLA-DRB2,DSB
REAC	Interferon Signaling	REAC:R-BTA-913531	2.85174e-06	5.54489	48	382	18	4722	STAT1,STAT2,DDX58,EIF2AK2,IRF9,PTPN2,SOCS1,SOCS3,USP18,RNASEL,IRF3,ISG15,MX2,ABCE1,EIF4G3,EIF4E,JAK2,IFNAR1
REAC	Immune System	REAC:R-BTA-168256	5.58357e-05	4.25309	928	382	115	4722	STAT1,TAP1,STAT2,B2M,DDX58,CSF1,RNF19B,LOC509283,PRKG1,EIF2AK2,FCGR2A,IRF9,ERAP1,RAB27A,FCGR3A,LOC618733,CD46,PTPN2,SOCS1,CD53,TRIM21,BIRC3,SOCS3,CD274,CMTM6,MAP3K8,GAB2,IL15RA,PPP2R5B,MAP3K1,TAPBP,IL2RA,PNP,GDI2,PTPRJ,USP18,RNASEL,ANO6,LOC107131209,CRK,CLEC2B,PSMA2,FOS,C4A,IRF3,IL6ST,CTSS,ISG15,UBR1,RAB14,MX2,FCGR2B,FCGR1A,BTBD1,RNF138,BOLA-NC1,TBK1,ABCE1,COPB1,RBCK1,IRAK4,PIK3CA,LOC107131749,TI…
REAC	Adaptive Immune System	REAC:R-BTA-1280218	8.1414e-05	4.0893	317	382	52	4722	TAP1,B2M,RNF19B,LOC509283,PRKG1,ERAP1,LOC618733,SOCS1,TRIM21,SOCS3,CD274,MAP3K8,PPP2R5B,TAPBP,CLEC2B,CTSS,UBR1,FCGR1A,BTBD1,RNF138,BOLA-NC1,RBCK1,PIK3CA,LOC107131749,LTN1,ASB15,BOLA-DMA,UBE2W,BOLA-DMB,RNF114,UBE2V2,UBB,LOC100848815,NEDD4L,RCHY1,BOLA-DRA,BOLA,SLAMF6,BOLA-DRB3,JSP.1,RAP1B,NRAS,DET1,HECTD2,BOLA-DRB2,RLIM,PPP2CA,DSB,UBE2D1,CBLL1,SEC24A,CUL5
REAC	Antiviral mechanism by IFN-stimulated genes	REAC:R-BTA-1169410	0.000335917	3.47377	25	382	11	4722	STAT1,DDX58,EIF2AK2,USP18,RNASEL,IRF3,ISG15,MX2,ABCE1,EIF4G3,EIF4E
REAC	Class I MHC mediated antigen processing & presentation	REAC:R-BTA-983169	0.000495908	3.3046	173	382	33	4722	TAP1,B2M,RNF19B,LOC509283,ERAP1,LOC618733,SOCS1,TRIM21,SOCS3,TAPBP,UBR1,FCGR1A,BTBD1,RNF138,BOLA-NC1,RBCK1,LTN1,ASB15,UBE2W,RNF114,UBE2V2,UBB,NEDD4L,RCHY1,BOLA,JSP.1,DET1,HECTD2,RLIM,UBE2D1,CBLL1,SEC24A,CUL5
REAC	Death Receptor Signalling	REAC:R-BTA-73887	0.00251149	2.60007	35	382	12	4722	BIRC3,FAS,RIPK1,RNF31,TNF,CASP8,CFLAR,TNFSF10,RBCK1,UBB,SPPL2A,TNFRSF10D
REAC	Antigen Presentation: Folding, assembly and peptide loading of class I MHC	REAC:R-BTA-983170	0.00256534	2.59086	20	382	9	4722	TAP1,B2M,ERAP1,LOC618733,TAPBP,BOLA-NC1,BOLA,JSP.1,SEC24A
REAC	TNF signaling	REAC:R-BTA-75893	0.00256534	2.59086	20	382	9	4722	BIRC3,RIPK1,RNF31,TNF,CASP8,CFLAR,RBCK1,UBB,SPPL2A
REAC	Cytokine Signaling in Immune system	REAC:R-BTA-1280215	0.00348125	2.45827	214	382	36	4722	STAT1,STAT2,DDX58,CSF1,EIF2AK2,IRF9,PTPN2,SOCS1,BIRC3,SOCS3,GAB2,IL15RA,IL2RA,PTPRJ,USP18,RNASEL,CRK,FOS,IRF3,IL6ST,ISG15,MX2,TBK1,ABCE1,IRAK4,PIK3CA,FLT3LG,UBB,EIF4G3,EIF4E,JAK2,TNFSF4,NRAS,LTA,IFNAR1,PPP2CA
REAC	ISG15 antiviral mechanism	REAC:R-BTA-1169408	0.0041718	2.37968	21	382	9	4722	STAT1,DDX58,EIF2AK2,USP18,IRF3,ISG15,MX2,EIF4G3,EIF4E
REAC	Programmed Cell Death	REAC:R-BTA-5357801	0.00423994	2.37264	61	382	16	4722	CASP7,BIRC3,FAS,BMF,RIPK1,PMAIP1,CASP8,CFLAR,TNFSF10,BCL2,UBB,KPNB1,NMT1,TNFRSF10D,DFFB,CYCS
REAC	Apoptosis	REAC:R-BTA-109581	0.00823815	2.08417	51	382	14	4722	CASP7,FAS,BMF,RIPK1,PMAIP1,CASP8,CFLAR,TNFSF10,BCL2,KPNB1,NMT1,TNFRSF10D,DFFB,CYCS
REAC	Interferon alpha/beta signaling	REAC:R-BTA-909733	0.0146834	1.83317	19	382	8	4722	STAT1,STAT2,IRF9,SOCS1,SOCS3,RNASEL,ABCE1,IFNAR1
REAC	ER-Phagosome pathway	REAC:R-BTA-1236974	0.019709	1.70534	15	382	7	4722	TAP1,B2M,LOC618733,TAPBP,BOLA-NC1,BOLA,JSP.1
REAC	Regulation by c-FLIP	REAC:R-BTA-3371378	0.0221585	1.65446	11	382	6	4722	FAS,RIPK1,CASP8,CFLAR,TNFSF10,TNFRSF10D
REAC	Dimerization of procaspase-8	REAC:R-BTA-69416	0.0221585	1.65446	11	382	6	4722	FAS,RIPK1,CASP8,CFLAR,TNFSF10,TNFRSF10D
REAC	Caspase activation via extrinsic apoptotic signalling pathway	REAC:R-BTA-5357769	0.0221585	1.65446	11	382	6	4722	FAS,RIPK1,CASP8,CFLAR,TNFSF10,TNFRSF10D
REAC	Caspase activation via Death Receptors in the presence of ligand	REAC:R-BTA-140534	0.0221585	1.65446	11	382	6	4722	FAS,RIPK1,CASP8,CFLAR,TNFSF10,TNFRSF10D
REAC	CASP8 activity is inhibited	REAC:R-BTA-5218900	0.0221585	1.65446	11	382	6	4722	FAS,RIPK1,CASP8,CFLAR,TNFSF10,TNFRSF10D
REAC	Regulation of TNFR1 signaling	REAC:R-BTA-5357905	0.0326205	1.48651	16	382	7	4722	BIRC3,RIPK1,TNF,CASP8,CFLAR,UBB,SPPL2A
REAC	Regulation of necroptotic cell death	REAC:R-BTA-5675482	0.0342022	1.46595	21	382	8	4722	BIRC3,FAS,RIPK1,CASP8,CFLAR,TNFSF10,UBB,TNFRSF10D
REAC	Cytosolic sensors of pathogen-associated DNA	REAC:R-BTA-1834949	0.0413095	1.38395	12	382	6	4722	TRIM21,IRF3,TBK1,UBB,DHX36,IRF7
REAC	RIPK1-mediated regulated necrosis	REAC:R-BTA-5213460	0.0499973	1.30105	22	382	8	4722	BIRC3,FAS,RIPK1,CASP8,CFLAR,TNFSF10,UBB,TNFRSF10D
REAC	Regulated Necrosis	REAC:R-BTA-5218859	0.0499973	1.30105	22	382	8	4722	BIRC3,FAS,RIPK1,CASP8,CFLAR,TNFSF10,UBB,TNFRSF10D
WP	Type II interferon signaling (IFNG)	WP:WP1017	3.21127e-09	8.49332	32	374	18	3912	IRF8,STAT1,TAP1,ICAM1,IRF1,STAT2,LOC511531,EIF2AK2,PSMB9,IFIT2,LOC512672,SOCS1,SOCS3,ISG15,OAS1Y,IRF4,JAK2,IRF2
WP	Apoptosis	WP:WP1018	1.40056e-06	5.8537	72	374	24	3912	IRF1,BIRC3,FAS,CASP4,RIPK1,TNF,MAP3K1,CASP8,IRF3,SCAF11,TNFRSF1B,IRF4,CFLAR,TNFSF10,BCL2,MYC,MDM2,BIRC2,IRF7,HELLS,LTA,IRF2,DFFB,CYCS
WP	Regulation of toll-like receptor signaling pathway	WP:WP3132	0.00180065	2.74457	116	374	26	3912	STAT1,TIFA,CD180,SOCS1,RIPK1,MAP3K8,CISH,RNF31,TNF,IFNAR2,TLR4,CASP8,FOS,IRF3,MAP2K1,CYLD,PELI1,TBK1,RBCK1,IRAK4,PIK3CA,TICAM2,SPP1,MAP2K6,IRF7,IFNAR1
WP	mRNA Processing	WP:WP1023	0.00508148	2.29401	109	374	24	3912	XRN2,RNGTT,SRSF1,SRSF6,SRP54,SRSF3,SRSF7,SF3B1,PAPOLA,HNRNPAB,CSTF1,CDC40,RBM17,SRRM1,RBM39,TRA2B,HNRNPR,PRMT1,PRPF40A,HNRNPH2,CPSF2,CSTF2T,TMED10,CELF1
WP	Proteasome Degradation	WP:WP1079	0.00807687	2.09276	54	374	15	3912	PSMB9,UBA7,PSMB10,PSME2,PSMB8,PSMA2,PSME1,PSMD10,UBE2D3,PSMA3,UBB,PSMA4,JSP.1,PSMD12,UBE2D1
WP	IL-2 Signaling Pathway	WP:WP973	0.0210033	1.67771	35	374	11	3912	STAT3,STAT1,LCK,NMI,SOCS3,CISH,IL2RA,FOS,MAP2K1,BCL2,MYC
WP	FAS pathway and Stress induction of HSP regulation	WP:WP1019	0.0234622	1.62963	41	374	12	3912	FAS,TNF,MAP3K1,CASP8,RB1,CFLAR,BCL2,PAK2,DAXX,MAPKAPK3,DFFB,CYCS
WP	DNA Damage Response	WP:WP3119	0.0290308	1.53714	60	374	15	3912	PML,RAD1,FAS,CASP8,RB1,GADD45B,MYC,NBN,RAD50,MDM2,ATM,CHEK1,TNFRSF10D,CDK1,CYCS
WP	Interactome of polycomb repressive complex 2 (PRC2)	WP:WP3136	0.0291623	1.53518	16	374	7	3912	EED,MORC3,JARID2,BCLAF1,AEBP2,STK38,SUZ12
WP	Thyroid Stimulating Hormone (TSH) signaling pathway	WP:WP3227	0.0303462	1.5179	54	374	14	3912	STAT3,STAT1,RB1,FOS,MAP2K1,MYC,EGR1,PIK3CA,TTF1,ADCY3,JAK2,MAP2K6,RAP1B,GNAQ
WP	Interferon type I signaling pathways	WP:WP3213	0.038181	1.41815	43	374	12	3912	STAT3,STAT1,STAT2,LCK,SOCS1,SOCS3,MAP3K1,IFNAR2,CRK,EIF4E,MAP2K6,IFNAR1
WP	Toll-like receptor signaling pathway	WP:WP1067	0.0436726	1.35979	82	374	18	3912	STAT1,RIPK1,MAP3K8,TNF,IFNAR2,TLR4,CASP8,FOS,IRF3,MAP2K1,TBK1,IRAK4,PIK3CA,TICAM2,SPP1,MAP2K6,IRF7,IFNAR1
HP	Abnormality of the lymph nodes	HP:0002733	5.92416e-06	5.22737	194	350	40	4527	IRF8,STAT3,FERMT3,PSMB9,ERAP1,LOC512672,RAB27A,PML,SP110,BIRC3,PSMB8,FAS,RIPK1,IL2RA,RUNX1,TLR4,PNP,LOC107131209,STAT4,STX11,CASP8,C4A,ISG15,TNFRSF1B,BCL6,LYST,MINPP1,BCL2,RBCK1,MYC,SMPD1,ASXL1,KRAS,ATM,DAXX,SPP1,NRAS,LOC529196,MAGT1,SMAD4
HP	Abnormal cellular immune system morphology	HP:0010987	8.23448e-06	5.08436	506	350	75	4527	STAT3,STAT1,LPIN2,CIITA,FCGR2A,ADAR,FERMT3,NOTCH1,MYPN,LCK,PSMB9,LOC512672,RAB27A,PML,SP110,ARHGAP31,IFIH1,SAMHD1,FAS,RIPK1,HAVCR2,IL2RA,RUNX1,PNP,LOC101906312,STAT4,PICALM,STX11,CASP8,RB1,IL6ST,TNFRSF1B,TRNT1,FCGR2B,LYST,SRP54,IVD,RBPJ,TBK1,SF3B1,MYC,IRAK4,SMPD1,NBN,PIK3CA,PMM2,LIPA,F13A1,MDM4,EOGT,SBDS,RFX5,ASXL1,KRAS,ETV6,CTC1,ATM,ATP6AP2,SPP1,VPS45,CBFB,HELLS,FANCM,NRAS,BUB1B,ITCH,FANCL,MAGT1…
HP	Abnormal leukocyte morphology	HP:0001881	8.23448e-06	5.08436	506	350	75	4527	STAT3,STAT1,LPIN2,CIITA,FCGR2A,ADAR,FERMT3,NOTCH1,MYPN,LCK,PSMB9,LOC512672,RAB27A,PML,SP110,ARHGAP31,IFIH1,SAMHD1,FAS,RIPK1,HAVCR2,IL2RA,RUNX1,PNP,LOC101906312,STAT4,PICALM,STX11,CASP8,RB1,IL6ST,TNFRSF1B,TRNT1,FCGR2B,LYST,SRP54,IVD,RBPJ,TBK1,SF3B1,MYC,IRAK4,SMPD1,NBN,PIK3CA,PMM2,LIPA,F13A1,MDM4,EOGT,SBDS,RFX5,ASXL1,KRAS,ETV6,CTC1,ATM,ATP6AP2,SPP1,VPS45,CBFB,HELLS,FANCM,NRAS,BUB1B,ITCH,FANCL,MAGT1…
HP	Abnormality of blood and blood-forming tissues	HP:0001871	9.15613e-06	5.03829	1209	350	141	4527	STAT3,STAT1,HPS4,LPIN2,PRKG1,CIITA,FCGR2A,ADAR,FERMT3,NOTCH1,MYPN,LCK,PSMB9,ERAP1,LOC512672,RAB27A,KIF15,PML,SP110,ARHGAP31,CD46,IFIH1,SAMHD1,BIRC3,PSMB8,FAS,RIPK1,HAVCR2,IL2RA,RUNX1,TLR4,PNP,USP18,ANO6,LOC101906312,RANBP2,LOC107131209,STAT4,PICALM,STX11,CASP8,RB1,C4A,MAP2K1,IL6ST,UBR1,TNFRSF1B,TRNT1,BCL6,FCGR2B,SDHAF2,LYST,ND5,YARS2,SRP54,PNPO,KIF23,ND4,CITED2,IVD,BCL2,RBPJ,SC5D,TBK1,PUS1,SF3B1,…
HP	Abnormal immune system morphology	HP:0032251	2.4425e-05	4.61217	528	350	76	4527	STAT3,STAT1,LPIN2,CIITA,FCGR2A,ADAR,FERMT3,NOTCH1,MYPN,LCK,PSMB9,LOC512672,RAB27A,PML,SP110,ARHGAP31,IFIH1,SAMHD1,FAS,RIPK1,HAVCR2,IL2RA,RUNX1,PNP,LOC101906312,STAT4,PICALM,STX11,CASP8,RB1,IL6ST,TNFRSF1B,TRNT1,FCGR2B,LYST,SRP54,IVD,RBPJ,TBK1,SF3B1,MYC,IRAK4,SMPD1,NBN,PIK3CA,PMM2,LIPA,F13A1,MDM4,EOGT,SBDS,RFX5,ASXL1,KRAS,ETV6,CTC1,ATM,ATP6AP2,SPP1,VPS45,CBFB,HELLS,FANCM,NRAS,BUB1B,ITCH,FANCL,MAGT1…
HP	Thrombocytopenia	HP:0001873	2.44278e-05	4.61212	313	350	53	4527	STAT3,STAT1,CIITA,FCGR2A,ADAR,NOTCH1,PSMB9,LOC512672,KIF15,PML,SP110,ARHGAP31,CD46,IFIH1,SAMHD1,PSMB8,FAS,RUNX1,PNP,USP18,STAT4,STX11,MAP2K1,FCGR2B,LYST,SRP54,IVD,RBPJ,SC5D,SF3B1,SMPD1,NBN,EOGT,SBDS,RFX5,KRAS,TMEM165,ETV6,CTC1,GUCY1A1,SPP1,VPS45,FYB1,FANCM,NRAS,DHFR,ESCO2,FANCL,MAGT1,RAD51C,DNAJC21,MYSM1,ABCD4
HP	Leukopenia	HP:0001882	4.10575e-05	4.38661	215	350	41	4527	STAT3,STAT1,CIITA,FCGR2A,NOTCH1,LCK,PSMB9,PML,SP110,ARHGAP31,FAS,RIPK1,IL2RA,RUNX1,PNP,STAT4,TRNT1,FCGR2B,LYST,SRP54,IVD,RBPJ,MYC,NBN,MDM4,EOGT,SBDS,RFX5,ASXL1,ATM,SPP1,VPS45,HELLS,FANCM,FANCL,MAGT1,RAD51C,CTPS1,DNAJC21,TTI2,MYSM1
HP	Abnormal platelet count	HP:0011873	0.000101811	3.9922	335	350	54	4527	STAT3,STAT1,CIITA,FCGR2A,ADAR,NOTCH1,PSMB9,LOC512672,KIF15,PML,SP110,ARHGAP31,CD46,IFIH1,SAMHD1,PSMB8,FAS,RUNX1,PNP,USP18,STAT4,STX11,MAP2K1,FCGR2B,LYST,SRP54,IVD,RBPJ,SC5D,SF3B1,SMPD1,NBN,PMM2,EOGT,SBDS,RFX5,KRAS,TMEM165,ETV6,CTC1,GUCY1A1,SPP1,VPS45,FYB1,FANCM,NRAS,DHFR,ESCO2,FANCL,MAGT1,RAD51C,DNAJC21,MYSM1,ABCD4
HP	Abnormal leukocyte count	HP:0011893	0.000109869	3.95912	354	350	56	4527	STAT3,STAT1,LPIN2,CIITA,FCGR2A,FERMT3,NOTCH1,LCK,PSMB9,RAB27A,PML,SP110,ARHGAP31,FAS,RIPK1,IL2RA,RUNX1,PNP,STAT4,STX11,CASP8,IL6ST,TRNT1,FCGR2B,LYST,SRP54,IVD,RBPJ,TBK1,SF3B1,MYC,IRAK4,NBN,MDM4,EOGT,SBDS,RFX5,ASXL1,KRAS,ETV6,ATM,ATP6AP2,SPP1,VPS45,HELLS,FANCM,NRAS,ITCH,FANCL,MAGT1,RAD51C,CTPS1,DNAJC21,TTI2,MYSM1,ABCD4
HP	Lymphadenopathy	HP:0002716	0.000136371	3.86528	183	350	36	4527	IRF8,STAT3,PSMB9,ERAP1,LOC512672,RAB27A,PML,BIRC3,PSMB8,FAS,RIPK1,IL2RA,RUNX1,TLR4,LOC107131209,STAT4,STX11,CASP8,C4A,ISG15,TNFRSF1B,BCL6,LYST,MINPP1,BCL2,RBCK1,SMPD1,ASXL1,KRAS,ATM,DAXX,SPP1,NRAS,LOC529196,MAGT1,SMAD4
HP	Fever	HP:0001945	0.000366244	3.43623	293	350	48	4527	IRF8,STAT3,LPIN2,CIITA,ADAR,PSMB9,PSMB10,ERAP1,LOC512672,RAB27A,PML,IFIH1,SAMHD1,BIRC3,PSMB8,FAS,RIPK1,HAVCR2,RUNX1,TLR4,LOC101906312,RANBP2,LOC107131209,STAT4,CACNA1A,STX11,RB1,C4A,TRNT1,BCL6,XPA,LYST,ND5,SRP54,ND4,BCL2,TBK1,PMM2,LIPA,GYPC,XPC,TMEM165,ATM,SPP1,LOC529196,ATP6,EPB41,GLA
HP	Abnormal thrombocyte morphology	HP:0001872	0.000472224	3.32585	369	350	56	4527	STAT3,STAT1,HPS4,CIITA,FCGR2A,ADAR,FERMT3,NOTCH1,PSMB9,LOC512672,KIF15,PML,SP110,ARHGAP31,CD46,IFIH1,SAMHD1,PSMB8,FAS,RUNX1,PNP,USP18,STAT4,STX11,MAP2K1,FCGR2B,LYST,SRP54,IVD,RBPJ,SC5D,SF3B1,SMPD1,NBN,PMM2,EOGT,SBDS,RFX5,KRAS,TMEM165,ETV6,CTC1,GUCY1A1,SPP1,VPS45,FYB1,FANCM,NRAS,DHFR,ESCO2,FANCL,MAGT1,RAD51C,DNAJC21,MYSM1,ABCD4
HP	Hemiparesis	HP:0001269	0.000896889	3.04726	89	350	22	4527	NOTCH1,ERAP1,LOC512672,SP110,ARHGAP31,FAS,TLR4,LOC107131209,STAT4,CACNA1A,C4A,ND5,ND4,RBPJ,TBK1,PIK3CA,EOGT,KRAS,GUCY1A1,LOC529196,DNM1L,GNAQ
HP	Abnormal abdomen morphology	HP:0001438	0.00137567	2.86149	684	350	86	4527	IRF8,STAT3,STAT1,PLAGL1,B2M,LPIN2,FCGR2A,ADAR,FERMT3,NOTCH1,MYPN,PSMB9,PSMB10,ERAP1,LOC512672,RAB27A,SP110,ARHGAP31,IFIH1,SAMHD1,PSMB8,FAS,RIPK1,HAVCR2,IL2RA,NOTCH2,RUNX1,TLR4,PNP,USP18,LOC101906312,LOC107131209,STAT4,STX11,CASP8,FOS,C4A,TNFRSF1B,TRNT1,BCL6,FCGR2B,LYST,ND5,YARS2,SRP54,ND4,BCL2,RBPJ,SC5D,RBCK1,SF3B1,NHLRC2,SMPD1,PIK3CA,PMM2,LIPA,TFAM,EOGT,SBDS,GYPC,ASXL1,KRAS,TMEM165,CTC1,ATM,ATP6…
HP	Anemia	HP:0001903	0.00140048	2.85372	539	350	72	4527	STAT3,STAT1,LPIN2,CIITA,FCGR2A,ADAR,FERMT3,PSMB9,LOC512672,KIF15,PML,SP110,CD46,BIRC3,PSMB8,FAS,RIPK1,HAVCR2,IL2RA,RUNX1,PNP,LOC101906312,STAT4,STX11,UBR1,TRNT1,FCGR2B,LYST,ND5,YARS2,SRP54,PNPO,KIF23,ND4,PUS1,SF3B1,NHLRC2,SMPD1,NBN,LIPA,MDM4,SBDS,GYPC,RFX5,ASXL1,KRAS,ETV6,CTC1,DAXX,SPP1,VPS45,SRD5A3,ABCD3,HELLS,COQ2,FANCM,NRAS,ISCU,HPRT1,DHFR,IREB2,DNM1L,SLC11A2,FANCL,SMAD4,EPB41,RAD51C,DNAJC21,G…
HP	Abnormal erythrocyte morphology	HP:0001877	0.00173959	2.75955	583	350	76	4527	STAT3,STAT1,LPIN2,CIITA,FCGR2A,ADAR,FERMT3,PSMB9,LOC512672,KIF15,PML,SP110,CD46,BIRC3,PSMB8,FAS,RIPK1,HAVCR2,IL2RA,RUNX1,PNP,LOC101906312,STAT4,STX11,UBR1,TRNT1,FCGR2B,LYST,ND5,YARS2,SRP54,PNPO,KIF23,ND4,SC5D,PUS1,SF3B1,NHLRC2,SMPD1,NBN,LIPA,MDM4,SBDS,GYPC,RFX5,ASXL1,KRAS,ETV6,CTC1,DAXX,SPP1,VPS45,SRD5A3,ABCD3,HELLS,COQ2,VPS13A,FANCM,NRAS,ISCU,HPRT1,ACSL4,DHFR,IREB2,DNM1L,SLC11A2,FANCL,SMAD4,EPB4…
HP	Abnormal lymphocyte morphology	HP:0004332	0.00214392	2.66879	154	350	30	4527	STAT1,CIITA,LCK,PSMB9,SP110,FAS,RIPK1,IL2RA,PNP,STAT4,CASP8,TNFRSF1B,TRNT1,LYST,SRP54,MYC,NBN,LIPA,MDM4,RFX5,KRAS,ATM,ATP6AP2,SPP1,HELLS,NRAS,MAGT1,CTPS1,TTI2,MYSM1
HP	Myositis	HP:0100614	0.00276744	2.55792	37	350	13	4527	ADAR,PSMB9,ERAP1,LOC512672,IFIH1,SAMHD1,FAS,TLR4,LOC107131209,STAT4,C4A,SPP1,LOC529196
HP	Visceromegaly	HP:0003271	0.00528599	2.27687	631	350	79	4527	IRF8,STAT3,STAT1,PLAGL1,B2M,LPIN2,FCGR2A,ADAR,FERMT3,NOTCH1,MYPN,PSMB9,PSMB10,ERAP1,LOC512672,RAB27A,SP110,IFIH1,SAMHD1,PSMB8,FAS,RIPK1,HAVCR2,IL2RA,NOTCH2,RUNX1,TLR4,PNP,USP18,LOC101906312,LOC107131209,STAT4,STX11,CASP8,FOS,C4A,TNFRSF1B,TRNT1,BCL6,FCGR2B,LYST,ND5,YARS2,SRP54,ND4,BCL2,SC5D,RBCK1,SF3B1,NHLRC2,SMPD1,PIK3CA,PMM2,LIPA,SBDS,GYPC,ASXL1,KRAS,TMEM165,CTC1,ATM,ATP6AP2,DAXX,VPS45,PEX3,ABCD…
HP	Pericarditis	HP:0001701	0.00660654	2.18003	34	350	12	4527	FCGR2A,ERAP1,LOC512672,MAF,FAS,TLR4,LOC107131209,STAT4,C4A,FCGR2B,PMM2,LOC529196
HP	Abnormal lymphocyte count	HP:0040088	0.00676481	2.16974	138	350	27	4527	STAT1,CIITA,LCK,PSMB9,SP110,FAS,RIPK1,IL2RA,PNP,STAT4,CASP8,TRNT1,SRP54,MYC,NBN,MDM4,RFX5,KRAS,ATM,ATP6AP2,SPP1,HELLS,NRAS,MAGT1,CTPS1,TTI2,MYSM1
HP	Panniculitis	HP:0012490	0.00747889	2.12616	24	350	10	4527	ADAR,LCK,PSMB9,IFIH1,SAMHD1,PSMB8,FAS,HAVCR2,LOC101906312,MYSM1
HP	Abnormality of bone marrow cell morphology	HP:0005561	0.00799537	2.09716	172	350	31	4527	STAT3,LPIN2,CIITA,RAB27A,PML,SP110,FAS,HAVCR2,RUNX1,LOC101906312,TNFRSF1B,LYST,SRP54,IVD,SF3B1,MYC,NBN,MDM4,SBDS,RFX5,ASXL1,KRAS,CTC1,ATM,COQ2,NRAS,DHFR,ITCH,FANCL,DNAJC21,MYSM1
HP	Encephalitis	HP:0002383	0.00936311	2.02858	35	350	12	4527	STAT1,CIITA,ERAP1,LOC512672,FAS,TLR4,LOC107131209,STAT4,C4A,IRF3,RFX5,LOC529196
HP	Pulmonary infiltrates	HP:0002113	0.00977805	2.00975	53	350	15	4527	LPIN2,ERAP1,LOC512672,RAB27A,BIRC3,FAS,IL2RA,RUNX1,TLR4,LOC107131209,STAT4,C4A,SMPD1,ASXL1,LOC529196
HP	Pleuritis	HP:0002102	0.0175953	1.7546	26	350	10	4527	FCGR2A,ERAP1,LOC512672,FAS,TLR4,LOC107131209,STAT4,C4A,FCGR2B,LOC529196
HP	Porencephalic cyst	HP:0002132	0.0175953	1.7546	26	350	10	4527	ADAR,NOTCH1,ARHGAP31,IFIH1,SAMHD1,RBPJ,EOGT,KRAS,NRAS,TCTN3
HP	Decreased body weight	HP:0004325	0.0180059	1.74458	1309	350	137	4527	STAT3,PLAGL1,RBBP8,LPIN2,CIITA,FCGR2A,ADAR,NOTCH1,MYPN,LCK,PSMB9,PSMB10,ERAP1,EXT1,LOC512672,KIF15,PML,SP110,ARHGAP31,IFIH1,BIRC3,PSMB8,FAS,RIPK1,DDX3X,HAVCR2,GJA1,TGIF1,RERE,FTSJ1,IL2RA,NOTCH2,RUNX1,TLR4,PNP,LOC101906312,LOC107131209,STAT4,DDX6,CACNA1A,MED13,CASP8,RB1,FOS,C4A,PNPT1,MAP2K1,PPP2R3C,UBR1,USP9X,ELAC2,MSMO1,LARP7,BCL6,FCGR2B,FMR1,ATXN7,SDHAF2,XPA,ND5,YARS2,SRP54,PNPO,ND4,BCL2,ORC4,RB…
HP	Pancytopenia	HP:0001876	0.0234623	1.62963	107	350	22	4527	STAT3,CIITA,RAB27A,PML,SP110,HAVCR2,RUNX1,LOC101906312,LYST,SRP54,IVD,SF3B1,NBN,SBDS,RFX5,ASXL1,KRAS,COQ2,NRAS,DHFR,ITCH,DNAJC21
HP	Oral ulcer	HP:0000155	0.0244689	1.61138	44	350	13	4527	ERAP1,LOC512672,FAS,RIPK1,TLR4,LOC107131209,STAT4,C4A,SRP54,SBDS,SPP1,LOC529196,DNAJC21
HP	Abnormality of temperature regulation	HP:0004370	0.028644	1.54297	399	350	54	4527	IRF8,STAT3,LPIN2,CIITA,ADAR,PSMB9,PSMB10,ERAP1,LOC512672,RAB27A,PML,IFIH1,SAMHD1,BIRC3,PSMB8,FAS,RIPK1,HAVCR2,TGIF1,RUNX1,TLR4,LOC101906312,RANBP2,LOC107131209,STAT4,CACNA1A,STX11,RB1,C4A,MAP2K1,TRNT1,BCL6,XPA,LYST,ND5,SRP54,ND4,BCL2,TBK1,PMM2,LIPA,STAG2,GYPC,XPC,TMEM165,ATM,SPP1,TSPYL1,LOC529196,ATP6,EPB41,ITPR2,ATP7A,GLA
HP	Serositis	HP:0045073	0.0330234	1.48118	39	350	12	4527	FCGR2A,ERAP1,LOC512672,MAF,FAS,TLR4,LOC107131209,STAT4,C4A,FCGR2B,PMM2,LOC529196
HP	Lymphopenia	HP:0001888	0.0375866	1.42497	118	350	23	4527	STAT1,CIITA,LCK,PSMB9,SP110,FAS,RIPK1,IL2RA,PNP,STAT4,TRNT1,SRP54,MYC,NBN,MDM4,RFX5,ATM,SPP1,HELLS,MAGT1,CTPS1,TTI2,MYSM1
HP	Hemiplegia/hemiparesis	HP:0004374	0.03839	1.41578	203	350	33	4527	ADAR,NOTCH1,ERAP1,EXT1,LOC512672,SP110,ARHGAP31,IFIH1,SAMHD1,FAS,RERE,TLR4,LOC107131209,STAT4,CACNA1A,C4A,NUP107,ND5,ND4,RBPJ,TBK1,PIK3CA,EOGT,KRAS,CTC1,PMS1,GUCY1A1,SPP1,ATP8,HPRT1,LOC529196,DNM1L,GNAQ
HP	Abnormality of multiple cell lineages in the bone marrow	HP:0012145	0.0385242	1.41427	151	350	27	4527	STAT3,CIITA,RAB27A,PML,SP110,FAS,HAVCR2,RUNX1,LOC101906312,LYST,SRP54,IVD,SF3B1,NBN,MDM4,SBDS,RFX5,ASXL1,KRAS,CTC1,COQ2,NRAS,DHFR,ITCH,FANCL,DNAJC21,MYSM1
HP	Orchitis	HP:0100796	0.0392514	1.40615	18	350	8	4527	ERAP1,LOC512672,FAS,TLR4,LOC107131209,STAT4,C4A,LOC529196
HP	Internal hemorrhage	HP:0011029	0.040416	1.39345	277	350	41	4527	STAT3,PRKG1,NOTCH1,ERAP1,LOC512672,PML,SP110,ARHGAP31,CD46,FAS,TLR4,USP18,RANBP2,LOC107131209,STAT4,RB1,C4A,SDHAF2,KIF23,IVD,RBPJ,SF3B1,MYC,PIK3CA,PMM2,F13A1,MAX,ZEB2,EOGT,SBDS,KRAS,CTC1,PMS1,DAXX,ATP6V0A2,ACTA2,LOC529196,SMAD4,ATP7A,APP,GNAQ
HP	Abnormal T cell count	HP:0011839	0.0405893	1.39159	59	350	15	4527	CIITA,LCK,SP110,FAS,RIPK1,IL2RA,PNP,CASP8,MYC,NBN,RFX5,ATM,ATP6AP2,MAGT1,CTPS1
HP	Abnormal bleeding	HP:0001892	0.0463232	1.3342	436	350	57	4527	STAT3,HPS4,PRKG1,FERMT3,NOTCH1,ERAP1,LOC512672,RAB27A,PML,SP110,ARHGAP31,CD46,FAS,RUNX1,TLR4,USP18,ANO6,RANBP2,LOC107131209,STAT4,RB1,C4A,MAP2K1,SDHAF2,LYST,KIF23,IVD,RBPJ,SF3B1,MYC,SMPD1,PIK3CA,PMM2,F13A1,MAX,ZEB2,EOGT,SBDS,KRAS,NEDD4L,ETV6,CTC1,PMS1,DAXX,ATP6V0A2,ACTA2,BMS1,FYB1,MTAP,NRAS,PRDM5,LOC529196,TMTC3,SMAD4,ATP7A,APP,GNAQ

## Sheet: Monocyte ISGs GO
source	term_name	term_id	adjusted_p_value	negative_log10_of_adjusted_p_value	term_size	query_size	intersection_size	effective_domain_size	intersections
GO:MF	RNA binding	GO:0003723	4.68978e-18	17.3288	1097	1351	179	16724	OAS2,OAS1Y,OAS1Z,IFIH1,LOC100139670,DDX58,IFIT3,IFIT5,IFIT2,OAS1X,EIF2AK2,ZNFX1,ISG20,ADAR,CDKN2AIP,ARID5A,EZH2,PNPT1,STAT3,DHX58,SAMHD1,TRIM21,RBM43,SRSF10,TDRD7,DDX21,BRIX1,APOBEC3Z1,SLFN11,XRN2,HNRNPAB,MOV10,RSL1D1,ZFP36,NUDT4,RBM47,CLTC,FBL,MYH10,GNL3,RNASEL,SYNJ1,DNMT1,PUS7L,NOP58,CARHSP1,MRPS6,PPAN,DUSP11,CNOT4,NIFK,KHNYN,STAU1,PPRC1,SRSF7,SRSF6,ILF2,RPP25,DDX5,NOP2,RPF2,NOP56,MRM3,ERI1,RPL…
GO:MF	binding	GO:0005488	7.68625e-13	12.1143	12469	1351	1124	16724	PARP14,MX2,LOC101903126,OAS2,OAS1Y,OAS1Z,IRF8,CCL8,SOCS3,IFIH1,RNF19B,ALAS1,ANKRD22,LOC100139670,LOC513659,GBP5,LOC512486,GBP4,LOC781710,LOC507055,LOC511531,IRF1,DDX58,RHOH,PSTPIP2,IL7R,IFIT3,IFIT5,ADAM19,TRAFD1,DTX3L,IFIT2,PNKD,PHACTR2,OAS1X,TNFAIP2,LOC616254,IFI44,LOC112443175,TRANK1,TAP1,SOCS1,IRF7,EIF2AK2,ZBP1,LOC781977,STAT2,RTP4,UBA7,NAMPT,TLR4,CIITA,NLRC5,SEH1L,PIM1,PTPN2,TRIM25,ZNFX1,ISG2…
GO:MF	heterocyclic compound binding	GO:1901363	3.99512e-12	11.3985	5138	1351	543	16724	PARP14,MX2,LOC101903126,OAS2,OAS1Y,OAS1Z,IRF8,IFIH1,ALAS1,LOC100139670,LOC513659,GBP5,LOC512486,GBP4,LOC781710,LOC507055,LOC511531,IRF1,DDX58,RHOH,IFIT3,IFIT5,IFIT2,OAS1X,IFI44,TRANK1,TAP1,IRF7,EIF2AK2,ZBP1,STAT2,UBA7,CIITA,NLRC5,PIM1,ZNFX1,ISG20,CGAS,ADAR,CTPS1,RAB27A,MAFF,CDKN2AIP,IFI16,PLAGL1,TNF,RIPK1,TIMELESS,MLKL,ATAD1,BATF3,AEN,ARID5A,EZH2,PNPT1,ARID5B,TOP1,STAT3,DHX58,STAT1,RAB20,ARHGAP5,…
GO:MF	organic cyclic compound binding	GO:0097159	2.6072e-11	10.5838	5209	1351	545	16724	PARP14,MX2,LOC101903126,OAS2,OAS1Y,OAS1Z,IRF8,IFIH1,ALAS1,LOC100139670,LOC513659,GBP5,LOC512486,GBP4,LOC781710,LOC507055,LOC511531,IRF1,DDX58,RHOH,IFIT3,IFIT5,IFIT2,OAS1X,IFI44,TRANK1,TAP1,IRF7,EIF2AK2,ZBP1,STAT2,UBA7,CIITA,NLRC5,PIM1,ZNFX1,ISG20,CGAS,ADAR,CTPS1,RAB27A,MAFF,CDKN2AIP,IFI16,PLAGL1,TNF,RIPK1,TIMELESS,MLKL,ATAD1,BATF3,AEN,ARID5A,EZH2,PNPT1,ARID5B,TOP1,STAT3,DHX58,STAT1,RAB20,ARHGAP5,…
GO:MF	nucleic acid binding	GO:0003676	3.24107e-09	8.48931	3241	1351	360	16724	PARP14,OAS2,OAS1Y,OAS1Z,IRF8,IFIH1,LOC100139670,IRF1,DDX58,IFIT3,IFIT5,IFIT2,OAS1X,IRF7,EIF2AK2,ZBP1,STAT2,NLRC5,ZNFX1,ISG20,CGAS,ADAR,MAFF,CDKN2AIP,IFI16,PLAGL1,TNF,TIMELESS,BATF3,AEN,ARID5A,EZH2,PNPT1,ARID5B,TOP1,STAT3,DHX58,STAT1,SAMHD1,BHLHE40,CREM,TRIM21,IKZF4,RBM43,SRSF10,POLB,TDRD7,TFEC,IRF9,KLF7,DDX21,BRIX1,BACH1,APOBEC3Z1,NUPR1,IRF3,SLFN11,SP110,XRN2,BATF2,RERE,HNRNPAB,TCF7L2,MOV10,XBP1,…
GO:MF	protein binding	GO:0005515	1.38036e-07	6.86001	7423	1351	709	16724	PARP14,MX2,IRF8,CCL8,SOCS3,IFIH1,RNF19B,ALAS1,ANKRD22,LOC100139670,GBP5,LOC781710,RHOH,PSTPIP2,IL7R,IFIT3,IFIT5,ADAM19,DTX3L,IFIT2,PHACTR2,TNFAIP2,LOC616254,LOC112443175,TRANK1,TAP1,SOCS1,IRF7,EIF2AK2,LOC781977,RTP4,NAMPT,TLR4,CIITA,NLRC5,SEH1L,PIM1,PTPN2,TRIM25,NOD1,CHP1,ADAR,PLEK,CTPS1,CDADC1,DENND3,TRIM5,EID2,CEP192,IL27,TNS3,CDKN2AIP,SDC3,FAS,DCAF12,LOC784541,TRAF5,PARP9,CSF2RB,TNF,RIPK1,TLE1…
GO:MF	identical protein binding	GO:0042802	3.70478e-07	6.43124	1437	1351	180	16724	IFIH1,ALAS1,GBP5,LOC781710,IFIT3,EIF2AK2,NAMPT,TLR4,NOD1,PLEK,CTPS1,CDADC1,TRIM5,SDC3,FAS,TRAF5,TNF,RIPK1,TLE1,NMI,PML,ARID5A,GRAMD2B,LOC616948,STAT3,STAT1,SAMHD1,TNFSF10,PTGS2,BHLHE40,SNX16,TRIM21,TRIM34,TIRAP,MAP3K5,MX1,SAT1,DDX21,SDS,IRF3,KYNU,XRN2,ECE1,CASP8,HM13,INHBA,PIK3AP1,KCTD12,PTX3,RNF8,FNBP1,KATNAL1,RBCK1,PSME2,LOC516599,CD53,IFI35,SAV1,ACOX1,FOXJ2,TGM1,OLR1,QTRT2,TLK2,STK3,MVP,TREX1,…
GO:MF	enzyme binding	GO:0019899	1.17663e-05	4.92936	1514	1351	181	16724	PARP14,RNF19B,RHOH,DTX3L,SOCS1,PTPN2,PLEK,TRIM5,CEP192,FAS,TRAF5,PARP9,TNF,RIPK1,MLKL,GABARAPL1,PML,RICTOR,PTPN1,FZD5,LOC616948,STAT3,STAT1,USP25,PTGS2,TRIM21,POLB,TRIM34,DAXX,MAP3K5,DUSP5,PDE3B,SLC9A3R1,ATP2A2,SPRED1,CFLAR,CDKN1A,TCF7L2,CASP8,HM13,ZFP36,HIF1A,CD28,MAP3K1,GATA6,TXNIP,CD40,CLTC,TRIB1,BCL2L11,FBL,PTPN22,EPS8,RNF8,TOR1AIP2,RBBP6,RALBP1,CKB,LOC516599,JAK3,GCLM,AKAP13,CCBE1,BID,NOP58,…
GO:MF	transcription factor binding	GO:0008134	4.42484e-05	4.3541	400	1351	64	16724	DTX3L,PIM1,PTPN2,TLE1,GABARAPL1,ARID5A,STAT3,BHLHE40,IKZF4,DAXX,MED13,TCF7L2,HIF1A,GATA6,TRIB1,FBL,KCTD1,E2F2,PPARD,PHF12,CNOT7,GTF2H1,NOP58,BCL3,DR1,HDAC4,LCOR,RBL1,PIAS2,JUND,PPRC1,DDX5,DDX3X,MMS19,PBX2,NAB1,MYBBP1A,GTF2B,SP1,RUNX2,NBN,HNRNPU,TAF4B,MED1,PAXBP1,HHEX,DDX54,DLL1,ZNHIT6,STAT5B,KLF4,SMARCE1,KAT2A,TMF1,POLR1E,PDCD11,USP7,C1D,PTPRN,CREG1,PSMD10,NFKB1,PRKCB,CNOT1
GO:MF	transcription coregulator activity	GO:0003712	5.19276e-05	4.2846	393	1351	63	16724	PARP14,TRIM25,PARP9,TLE1,NMI,ARID5A,EZH2,ARID5B,TRIM21,DAXX,MED13,PARP10,NUPR1,KDM7A,RERE,ZMIZ2,KCTD1,TRIM38,PHF12,CNOT7,TLE3,BCL3,TCERG1,DR1,DYRK1B,BCLAF1,HDAC4,LCOR,RBBP8,PIAS2,NCOA7,PPRC1,BUD31,MMS19,NAB1,CEBPZ,ACTN1,MYBBP1A,CCAR1,CNOT9,TRIM27,IRF4,TOB1,N4BP2L2,HNRNPU,NUP98,SERTAD2,XPC,MED1,TAF15,TRIM14,SFMBT2,DDX54,WDR77,NOC2L,ATF7IP,KAT2A,EWSR1,RRP1B,TMF1,RYBP,C1D,PRKCB
GO:MF	catalytic activity, acting on RNA	GO:0140098	6.38662e-05	4.19473	335	1351	56	16724	IFIH1,DDX58,ISG20,PNPT1,DHX58,CMTR2,DDX21,XRN2,MOV10,CNOT6L,FBL,PRORSD1,ELAC2,RNASEL,CNOT7,QTRT2,TRMT13,CMTR1,KHNYN,PDE12,TRMT12,RPP25,DDX5,NOP2,MRM3,ERI1,DDX3X,FTSJ3,FTSJ1,METTL1,EXOSC10,FARSA,DDX47,DDX54,N4BP1,AGO2,DDX46,DHX8,DIMT1,POLR3D,NOB1,DDX49,MRPL44,METTL2A,POLR1E,DBR1,DHX40,DDX39B,EIF4A2,RIDA,XRN1,TRMT1,DALRD3,RTCB,CNOT1,METTL3
GO:MF	double-stranded RNA binding	GO:0003725	0.000143767	3.84234	69	1351	20	16724	OAS2,OAS1Y,OAS1Z,IFIH1,DDX58,OAS1X,EIF2AK2,ADAR,DHX58,DDX21,CLTC,ILF2,DDX3X,ACTN1,YRDC,FMR1,HNRNPU,AGO2,MRPL44,FXR1
GO:MF	purine ribonucleoside triphosphate binding	GO:0035639	0.000208113	3.6817	1651	1351	188	16724	MX2,LOC101903126,OAS2,IFIH1,LOC513659,GBP5,LOC512486,GBP4,LOC781710,LOC507055,LOC511531,DDX58,RHOH,IFI44,TRANK1,TAP1,EIF2AK2,UBA7,CIITA,PIM1,CTPS1,RAB27A,RIPK1,MLKL,ATAD1,TOP1,DHX58,RAB20,ARHGAP5,PDK4,STK17A,CDK19,KIF2C,ARL5B,MAP3K5,MX1,DDX21,ACSS1,ATP2A2,LYN,PIK3CD,RNGTT,ALPK1,LOC783604,TGFBR1,MAP3K1,TEC,DNAJA2,PIM3,TRIB1,P2RY1,ATAD2B,PRKX,MYH10,SWAP70,KATNAL1,GNL3,MOCS1,NAIP,RNASEL,GTPBP1,ATP13…
GO:MF	purine nucleotide binding	GO:0017076	0.000280363	3.55228	1722	1351	194	16724	MX2,LOC101903126,OAS2,IFIH1,LOC513659,GBP5,LOC512486,GBP4,LOC781710,LOC507055,LOC511531,DDX58,RHOH,IFI44,TRANK1,TAP1,EIF2AK2,UBA7,CIITA,PIM1,CTPS1,RAB27A,RIPK1,MLKL,ATAD1,TOP1,DHX58,RAB20,ARHGAP5,SAMHD1,PDK4,STK17A,CDK19,KIF2C,ARL5B,MAP3K5,MX1,DDX21,ACSS1,ATP2A2,LYN,PIK3CD,PDE4B,RNGTT,ALPK1,LOC783604,TGFBR1,MAP3K1,TEC,DNAJA2,PIM3,TRIB1,P2RY1,ATAD2B,PRKX,MYH10,SWAP70,KATNAL1,GNL3,MOCS1,NAIP,RNASEL…
GO:MF	transferase activity	GO:0016740	0.000297547	3.52645	2144	1351	233	16724	PARP14,OAS2,OAS1Y,OAS1Z,CCL8,RNF19B,ALAS1,DTX3L,CMPK2,OAS1X,EIF2AK2,NAMPT,PIM1,TRIM25,CGAS,SPTSSA,UMPS,TRIM5,LPCAT2,CD38,TRAF5,PARP9,RIPK1,MLKL,PML,HERC5,EZH2,PNPT1,TOP1,RNF144B,LOC616948,PARP12,CRLS1,PDK4,ELOVL5,TRIM21,STK17A,POLB,CDK19,TRIM34,PARP3,HERC6,CMTR2,MAP3K5,SAT1,PARP10,B3GNT2,PELI1,LYN,LOC509283,UBR1,PIK3CD,RNF114,RNGTT,ALPK1,CDKN1A,BIRC3,TGFBR1,ST3GAL4,MAP3K1,PLA2G4A,TEC,GCNT4,MYLIP,…
GO:MF	nucleotide binding	GO:0000166	0.000674245	3.17118	1949	1351	213	16724	MX2,LOC101903126,OAS2,IFIH1,LOC513659,GBP5,LOC512486,GBP4,LOC781710,LOC507055,LOC511531,DDX58,RHOH,IFI44,TRANK1,TAP1,EIF2AK2,UBA7,CIITA,PIM1,CTPS1,RAB27A,RIPK1,MLKL,ATAD1,TOP1,DHX58,RAB20,ARHGAP5,SAMHD1,PDK4,STK17A,CDK19,KIF2C,ARL5B,MAP3K5,MX1,DDX21,ACSS1,ATP2A2,LYN,PIK3CD,PDE4B,RNGTT,ALPK1,LOC783604,TGFBR1,ACSL4,MAP3K1,TEC,DNAJA2,ACSL5,PIM3,TRIB1,P2RY1,ATAD2B,PRKX,MYH10,SWAP70,KATNAL1,GNL3,MOCS1…
GO:MF	nucleoside phosphate binding	GO:1901265	0.000674245	3.17118	1949	1351	213	16724	MX2,LOC101903126,OAS2,IFIH1,LOC513659,GBP5,LOC512486,GBP4,LOC781710,LOC507055,LOC511531,DDX58,RHOH,IFI44,TRANK1,TAP1,EIF2AK2,UBA7,CIITA,PIM1,CTPS1,RAB27A,RIPK1,MLKL,ATAD1,TOP1,DHX58,RAB20,ARHGAP5,SAMHD1,PDK4,STK17A,CDK19,KIF2C,ARL5B,MAP3K5,MX1,DDX21,ACSS1,ATP2A2,LYN,PIK3CD,PDE4B,RNGTT,ALPK1,LOC783604,TGFBR1,ACSL4,MAP3K1,TEC,DNAJA2,ACSL5,PIM3,TRIB1,P2RY1,ATAD2B,PRKX,MYH10,SWAP70,KATNAL1,GNL3,MOCS1…
GO:MF	purine ribonucleotide binding	GO:0032555	0.000693884	3.15871	1702	1351	190	16724	MX2,LOC101903126,OAS2,IFIH1,LOC513659,GBP5,LOC512486,GBP4,LOC781710,LOC507055,LOC511531,DDX58,RHOH,IFI44,TRANK1,TAP1,EIF2AK2,UBA7,CIITA,PIM1,CTPS1,RAB27A,RIPK1,MLKL,ATAD1,TOP1,DHX58,RAB20,ARHGAP5,PDK4,STK17A,CDK19,KIF2C,ARL5B,MAP3K5,MX1,DDX21,ACSS1,ATP2A2,LYN,PIK3CD,PDE4B,RNGTT,ALPK1,LOC783604,TGFBR1,MAP3K1,TEC,DNAJA2,PIM3,TRIB1,P2RY1,ATAD2B,PRKX,MYH10,SWAP70,KATNAL1,GNL3,MOCS1,NAIP,RNASEL,GTPBP1…
GO:MF	ribonucleotide binding	GO:0032553	0.001193	2.92336	1716	1351	190	16724	MX2,LOC101903126,OAS2,IFIH1,LOC513659,GBP5,LOC512486,GBP4,LOC781710,LOC507055,LOC511531,DDX58,RHOH,IFI44,TRANK1,TAP1,EIF2AK2,UBA7,CIITA,PIM1,CTPS1,RAB27A,RIPK1,MLKL,ATAD1,TOP1,DHX58,RAB20,ARHGAP5,PDK4,STK17A,CDK19,KIF2C,ARL5B,MAP3K5,MX1,DDX21,ACSS1,ATP2A2,LYN,PIK3CD,PDE4B,RNGTT,ALPK1,LOC783604,TGFBR1,MAP3K1,TEC,DNAJA2,PIM3,TRIB1,P2RY1,ATAD2B,PRKX,MYH10,SWAP70,KATNAL1,GNL3,MOCS1,NAIP,RNASEL,GTPBP1…
GO:MF	mRNA binding	GO:0003729	0.00137737	2.86095	238	1351	41	16724	TDRD7,RSL1D1,ZFP36,RBM47,MYH10,GNL3,CARHSP1,KHNYN,SRSF6,DDX5,SRRM2,DDX3X,TRA2B,FUBP1,ACO1,RBMS1,PUM3,PKM,FMR1,HNRNPU,NUP98,MRPS11,RPL26,CCT5,N4BP1,EIF2S2,AGO2,PPP1R8,SERBP1,PCF11,PUM1,NSRP1,EIF2A,SAMD4A,EIF3D,RIDA,YBX3,ANGEL2,RPL35,FXR1,METTL3
GO:MF	anion binding	GO:0043168	0.00175834	2.7549	2096	1351	224	16724	MX2,LOC101903126,OAS2,IFIH1,ALAS1,LOC513659,GBP5,LOC512486,GBP4,LOC781710,LOC507055,LOC511531,DDX58,RHOH,IFI44,TRANK1,TAP1,EIF2AK2,UBA7,CIITA,PIM1,CGAS,PLEK,CTPS1,RAB27A,RIPK1,MLKL,MTHFD2,ATAD1,ARAP2,TOP1,NCF1,DHX58,RAB20,ZFYVE16,ARHGAP5,SAMHD1,PDK4,STK17A,CDK19,KIF2C,ARL5B,MAP3K5,MX1,DDX21,ACSS1,SDS,ATP2A2,LYN,KYNU,SCIN,UBR1,PIK3CD,PDE4B,RNGTT,ALPK1,LOC783604,TGFBR1,MAP3K1,PLA2G4A,GPR31,PLEKHA4,…
GO:MF	transcription corepressor activity	GO:0003714	0.00290221	2.53727	140	1351	28	16724	PARP14,PARP9,TLE1,ARID5A,EZH2,DAXX,PARP10,RERE,KCTD1,PHF12,CNOT7,TLE3,DR1,HDAC4,LCOR,RBBP8,MYBBP1A,CCAR1,TOB1,N4BP2L2,HNRNPU,MED1,SFMBT2,DDX54,NOC2L,ATF7IP,RYBP,C1D
GO:MF	snoRNA binding	GO:0030515	0.00565732	2.24739	30	1351	11	16724	ISG20,DDX21,NUDT4,NOP58,NOP56,DKC1,TSR1,BMS1,NUFIP1,RRP9,NHP2
GO:MF	carbohydrate derivative binding	GO:0097367	0.0101498	1.99354	1962	1351	207	16724	MX2,LOC101903126,OAS2,IFIH1,LOC513659,GBP5,LOC512486,GBP4,LOC781710,LOC507055,LOC511531,DDX58,RHOH,IFI44,TRANK1,TAP1,EIF2AK2,UBA7,TLR4,CIITA,PIM1,CTPS1,RAB27A,RIPK1,MLKL,ATAD1,CXCL10,TOP1,DHX58,RAB20,ARHGAP5,SAMHD1,PDK4,STK17A,CDK19,KIF2C,ARL5B,MAP3K5,MX1,DDX21,ACSS1,ATP2A2,LYN,PIK3CD,PDE4B,RNGTT,ALPK1,LOC783604,TGFBR1,MAP3K1,TEC,DNAJA2,PIM3,TRIB1,P2RY1,ATAD2B,PRKX,MYH10,SWAP70,KATNAL1,GNL3,MOCS1…
GO:MF	transferase activity, transferring phosphorus-containing groups	GO:0016772	0.0131543	1.88093	879	1351	105	16724	OAS2,OAS1Y,OAS1Z,CCL8,CMPK2,OAS1X,EIF2AK2,PIM1,CGAS,RIPK1,MLKL,PNPT1,TOP1,CRLS1,PDK4,STK17A,POLB,CDK19,MAP3K5,LYN,PIK3CD,RNGTT,ALPK1,CDKN1A,TGFBR1,MAP3K1,TEC,PIM3,TRIB1,PRKX,CKB,RNASEL,RFK,JAK3,CSNK1G1,PIK3C2A,AKAP13,IRAK4,PTK2B,TLK2,STK3,GK5,MAPKAPK3,AAK1,CDK17,THG1L,PRPS2,GK,DYRK1B,STK38L,RPS6KA3,GRK3,TTBK2,AK2,NUP107,JAK2,PIK3R6,PGS1,PLXNA1,ROR2,HIPK3,MKNK1,DKC1,RIPK3,PFKL,MMD,RIPK2,FLT1,IPPK,…
GO:MF	RNA helicase activity	GO:0003724	0.019251	1.71555	58	1351	15	16724	IFIH1,DDX58,DHX58,DDX21,MOV10,DDX5,DDX3X,DDX47,DDX54,DDX46,DHX8,DDX49,DHX40,DDX39B,EIF4A2
GO:MF	GTP binding	GO:0005525	0.0199579	1.69989	365	1351	52	16724	MX2,LOC101903126,LOC513659,GBP5,LOC512486,GBP4,LOC781710,LOC507055,LOC511531,RHOH,IFI44,RAB27A,RAB20,ARHGAP5,ARL5B,MX1,RNGTT,LOC783604,GNL3,MOCS1,GTPBP1,RAB14,GTPBP4,GCH1,CRACR2A,TUBB3,THG1L,IFI47,GIMAP8,ARL2,RAB33B,ATL3,GTPBP3,GNL2,RAB8B,TSR1,ARL8B,LOC527744,EIF2S3,BMS1,SRPRA,ARF3,RAB19,EIF5,RASD1,RAP2A,GFM2,RRAD,MFHAS1,RALB,LRRK2,RND1
GO:MF	mRNA 5'-UTR binding	GO:0048027	0.0284579	1.5458	19	1351	8	16724	RSL1D1,MYH10,GNL3,DDX3X,FMR1,MRPS11,RPL26,CCT5
GO:MF	translation initiation factor binding	GO:0031369	0.0290772	1.53645	24	1351	9	16724	DDX3X,EIF4E,ZPR1,FMR1,HHEX,EIF2S2,EIF5,NCK1,EIF3CL
GO:MF	ubiquitin-like protein ligase binding	GO:0044389	0.0292234	1.53427	243	1351	38	16724	DTX3L,TRAF5,PARP9,RIPK1,GABARAPL1,PML,FZD5,STAT1,USP25,DAXX,CDKN1A,CASP8,HM13,HIF1A,TXNIP,CD40,TRIB1,RNF8,CKB,BID,CEBPB,CCT2,PIAS2,BAG2,LTBR,CUL4A,CCDC50,EGR2,TRAF2,FBXO7,UBE2J1,SPOPL,MFHAS1,USP7,RALB,PSMA3,PTPRN,DET1
GO:MF	exoribonuclease activity, producing 5'-phosphomonoesters	GO:0016896	0.0364543	1.43825	30	1351	10	16724	ISG20,PNPT1,XRN2,CNOT6L,CNOT7,PDE12,ERI1,EXOSC10,XRN1,CNOT1
GO:MF	protein homodimerization activity	GO:0042803	0.0375543	1.42534	508	1351	66	16724	GBP5,LOC781710,NOD1,PLEK,CDADC1,TRIM5,RIPK1,PML,LOC616948,STAT3,STAT1,PTGS2,BHLHE40,TRIM21,TRIM34,MAP3K5,SDS,IRF3,KYNU,ECE1,HM13,RNF8,LOC516599,ACOX1,QTRT2,TREX1,GCH1,PTPRO,NACC2,SNX1,CALCOCO2,MCL1,ATF3,PEX7,KYAT3,ACTN1,CNOT9,SP1,FBXO4,TRIM27,BAK1,RIPK2,MGAT2,PGRMC1,CSF1,GLA,EXT1,FMR1,ATIC,HHEX,DAB2IP,IKBKB,HOOK1,DCK,TRPC6,HSD17B4,PSMF1,ADAM10,ECT2,GSS,XPNPEP1,LRRK2,BLOC1S6,ACOT7,MTPAP,FXR1
GO:MF	ribonuclease activity	GO:0004540	0.0381282	1.41875	97	1351	20	16724	ISG20,PNPT1,XRN2,CNOT6L,ELAC2,RNASEL,CNOT7,KHNYN,PDE12,RPP25,ERI1,EXOSC10,N4BP1,AGO2,NOB1,MRPL44,DBR1,RIDA,XRN1,CNOT1
GO:MF	helicase activity	GO:0004386	0.0389719	1.40925	136	1351	25	16724	IFIH1,DDX58,ZNFX1,DHX58,DDX21,MOV10,DDX18,DDX56,FBH1,DDX5,DDX27,DDX3X,CHD1,ERCC6L2,DDX51,DDX47,DDX54,DDX46,DHX8,DDX49,DHX40,DDX39B,EIF4A2,INO80,ASCC3
GO:MF	exoribonuclease activity	GO:0004532	0.0499414	1.30154	31	1351	10	16724	ISG20,PNPT1,XRN2,CNOT6L,CNOT7,PDE12,ERI1,EXOSC10,XRN1,CNOT1
GO:BP	response to biotic stimulus	GO:0009607	3.13025e-34	33.5044	1006	1397	206	17231	PARP14,MX2,OAS2,OAS1Y,OAS1Z,IRF8,IFIH1,RNF19B,LOC100139670,LOC513659,GBP5,LOC512486,GBP4,LOC781710,LOC507055,LOC511531,IRF1,DDX58,IL7R,IFIT3,IFI44L,IFIT5,TRAFD1,DTX3L,IFIT2,CMPK2,OAS1X,IFI44,SOCS1,CD274,IRF7,EIF2AK2,ZBP1,STAT2,LOC112441507,TLR4,CIITA,LOC100298356,NLRC5,SEH1L,PTPN2,TRIM25,ISG20,NOD1,CGAS,ADAR,CD80,TRIM5,CEP192,IL27,SBNO2,PARP9,IFI16,TNF,PMAIP1,RSAD2,MLKL,CXCL9,NMI,BATF3,PML,ARID5A…
GO:BP	response to other organism	GO:0051707	9.92375e-34	33.0033	975	1397	201	17231	PARP14,MX2,OAS2,OAS1Y,OAS1Z,IRF8,IFIH1,RNF19B,LOC100139670,LOC513659,GBP5,LOC512486,GBP4,LOC781710,LOC507055,LOC511531,IRF1,DDX58,IL7R,IFIT3,IFI44L,IFIT5,TRAFD1,DTX3L,IFIT2,CMPK2,OAS1X,IFI44,SOCS1,CD274,IRF7,EIF2AK2,ZBP1,STAT2,LOC112441507,TLR4,CIITA,LOC100298356,NLRC5,SEH1L,PTPN2,TRIM25,ISG20,NOD1,CGAS,ADAR,CD80,TRIM5,CEP192,IL27,SBNO2,PARP9,IFI16,TNF,PMAIP1,RSAD2,MLKL,CXCL9,NMI,BATF3,PML,ARID5A…
GO:BP	response to external biotic stimulus	GO:0043207	1.15849e-33	32.9361	976	1397	201	17231	PARP14,MX2,OAS2,OAS1Y,OAS1Z,IRF8,IFIH1,RNF19B,LOC100139670,LOC513659,GBP5,LOC512486,GBP4,LOC781710,LOC507055,LOC511531,IRF1,DDX58,IL7R,IFIT3,IFI44L,IFIT5,TRAFD1,DTX3L,IFIT2,CMPK2,OAS1X,IFI44,SOCS1,CD274,IRF7,EIF2AK2,ZBP1,STAT2,LOC112441507,TLR4,CIITA,LOC100298356,NLRC5,SEH1L,PTPN2,TRIM25,ISG20,NOD1,CGAS,ADAR,CD80,TRIM5,CEP192,IL27,SBNO2,PARP9,IFI16,TNF,PMAIP1,RSAD2,MLKL,CXCL9,NMI,BATF3,PML,ARID5A…
GO:BP	biological process involved in interspecies interaction between organisms	GO:0044419	8.40247e-33	32.0756	1075	1397	212	17231	PARP14,MX2,OAS2,OAS1Y,OAS1Z,IRF8,CCL8,IFIH1,RNF19B,LOC100139670,LOC513659,GBP5,LOC512486,GBP4,LOC781710,LOC507055,LOC511531,IRF1,DDX58,IL7R,IFIT3,IFI44L,IFIT5,TRAFD1,DTX3L,IFIT2,CMPK2,OAS1X,IFI44,SOCS1,CD274,IRF7,EIF2AK2,ZBP1,STAT2,LOC112441507,TLR4,CIITA,LOC100298356,NLRC5,SEH1L,PTPN2,TRIM25,ISG20,NOD1,CGAS,ADAR,CD80,TRIM5,CEP192,IL27,SBNO2,PARP9,IFI16,TNF,PMAIP1,RSAD2,MLKL,CXCL9,NMI,BATF3,PML,A…
GO:BP	immune system process	GO:0002376	3.45493e-31	30.4616	1988	1397	315	17231	PARP14,MX2,OAS2,OAS1Y,OAS1Z,IRF8,CCL8,IFIH1,RNF19B,ALAS1,LOC100139670,LOC513659,GBP5,LOC512486,GBP4,LOC781710,LOC507055,LOC511531,IRF1,DDX58,RHOH,IL7R,IFIT3,IFI44L,IFIT5,TRAFD1,DTX3L,IFIT2,OAS1X,IFI44,TAP1,SOCS1,CD274,IRF7,EIF2AK2,ZBP1,LOC781977,STAT2,LOC112441507,TLR4,CIITA,LOC100298356,NLRC5,SEH1L,PIM1,PTPN2,TRIM25,ISG20,NOD1,CGAS,ADAR,PLEK,CTPS1,CD80,TRIM5,TREML2,IL27,SBNO2,FAS,CD38,PARP9,IFI1…
GO:BP	immune response	GO:0006955	1.05262e-26	25.9777	1299	1397	226	17231	PARP14,MX2,OAS2,OAS1Y,OAS1Z,IRF8,CCL8,IFIH1,RNF19B,LOC100139670,LOC513659,GBP5,LOC512486,GBP4,LOC781710,LOC507055,LOC511531,IRF1,DDX58,IL7R,IFIT3,IFI44L,IFIT5,TRAFD1,DTX3L,IFIT2,OAS1X,IFI44,TAP1,SOCS1,CD274,IRF7,EIF2AK2,ZBP1,LOC781977,STAT2,LOC112441507,TLR4,CIITA,LOC100298356,NLRC5,SEH1L,PTPN2,TRIM25,ISG20,NOD1,CGAS,ADAR,CD80,TRIM5,IL27,SBNO2,FAS,PARP9,IFI16,TNF,PMAIP1,RSAD2,THEMIS2,MLKL,CXCL9,N…
GO:BP	defense response	GO:0006952	1.3651e-25	24.8648	1094	1397	199	17231	PARP14,MX2,OAS2,OAS1Y,OAS1Z,IRF8,SOCS3,IFIH1,RNF19B,LOC100139670,LOC513659,GBP5,LOC512486,GBP4,LOC781710,LOC507055,LOC511531,IRF1,DDX58,IL7R,IFIT3,IFI44L,IFIT5,TRAFD1,DTX3L,IFIT2,OAS1X,TAP1,SOCS1,IRF7,EIF2AK2,ZBP1,STAT2,LOC112441507,TLR4,CIITA,LOC100298356,NLRC5,SEH1L,PTPN2,TRIM25,ISG20,NOD1,CGAS,ADAR,TRIM5,IL27,SBNO2,PARP9,IFI16,TNF,RIPK1,PMAIP1,RSAD2,MLKL,CXCL9,NMI,SCN9A,PML,HERC5,RICTOR,CXCL10…
GO:BP	response to virus	GO:0009615	7.14505e-25	24.146	254	1397	81	17231	MX2,OAS2,OAS1Y,OAS1Z,IFIH1,LOC100139670,IRF1,DDX58,IFIT3,IFI44L,IFIT5,DTX3L,IFIT2,OAS1X,IRF7,EIF2AK2,ZBP1,LOC112441507,LOC100298356,NLRC5,ISG20,CGAS,ADAR,TRIM5,IL27,TNF,PMAIP1,RSAD2,MLKL,CXCL9,NMI,BATF3,HERC5,CXCL10,LOC616948,DHX58,IFITM1,STAT1,SAMHD1,MX1,DDX21,APOBEC3Z1,ISG15,IRF3,SLFN11,MOV10,IL15,HIF1A,ITGB6,IFITM3,CD40,PTPN22,ZC3HAV1,GSDME,TICAM2,RNASEL,CNOT7,PSMA2,TBX21,LOC516599,FGL2,TREX1,…
GO:BP	response to cytokine	GO:0034097	1.0058e-24	23.9975	653	1397	141	17231	PARP14,MX2,OAS2,IRF8,SOCS3,IFIH1,LOC100139670,LOC513659,GBP5,LOC512486,GBP4,LOC781710,LOC507055,LOC511531,IRF1,IL7R,IFIT3,IFIT2,IL15RA,SOCS1,IRF7,EIF2AK2,ZBP1,STAT2,TLR4,CIITA,NLRC5,PTPN2,TRIM25,ADAR,IL27,SBNO2,FAS,TRAF5,PARP9,IFI16,CSF2RB,TNF,RIPK1,EDN1,NMI,PML,PNPT1,ARID5B,CXCL10,STAT3,IFITM1,STAT1,RAB20,TNFSF13B,XAF1,SAMHD1,IL1A,PTGS2,TRIM21,DCSTAMP,IL1B,CCL5,MX1,B3GNT2,ISG15,IL4R,IRF3,KYNU,LO…
GO:BP	positive regulation of biological process	GO:0048518	2.88709e-24	23.5395	4684	1397	559	17231	PARP14,OAS2,IRF8,SOCS3,IFIH1,RNF19B,LOC100139670,GBP5,IRF1,DDX58,RHOH,IL7R,IFIT5,ADAM19,DTX3L,IFIT2,ARRDC4,SOCS1,CD274,IRF7,EIF2AK2,ZBP1,NAMPT,TLR4,CIITA,NLRC5,SEH1L,PIM1,PTPN2,TRIM25,NOD1,CHP1,CGAS,ADAR,PLEK,CD80,GAB1,TRIM5,RAB27A,MAFF,P2RY6,IL27,CDKN2AIP,SBNO2,FAS,CD38,LOC784541,TRAF5,PARP9,IFI16,PLAGL1,TNF,RIPK1,TLE1,PMAIP1,RSAD2,THEMIS2,MLKL,ATAD1,CXCL9,DCUN1D3,EDN1,NMI,PML,ARID5A,EZH2,PNPT1,…
GO:BP	response to stress	GO:0006950	4.64483e-23	22.333	2627	1397	359	17231	PARP14,MX2,OAS2,OAS1Y,OAS1Z,IRF8,SOCS3,IFIH1,RNF19B,ALAS1,LOC100139670,LOC513659,GBP5,LOC512486,GBP4,LOC781710,LOC507055,LOC511531,IRF1,DDX58,IL7R,IFIT3,IFI44L,IFIT5,TRAFD1,DTX3L,IFIT2,OAS1X,TAP1,SOCS1,IRF7,EIF2AK2,ZBP1,STAT2,LOC112441507,UBA7,TLR4,CIITA,LOC100298356,NLRC5,SEH1L,PTPN2,TRIM25,ISG20,NOD1,CGAS,ADAR,PLEK,TRIM5,IL27,CDKN2AIP,SBNO2,FAS,TRAF5,PARP9,IFI16,TNF,RIPK1,TIMELESS,PMAIP1,RSAD2,…
GO:BP	defense response to other organism	GO:0098542	9.45505e-23	22.0243	735	1397	148	17231	PARP14,MX2,OAS2,OAS1Y,OAS1Z,IRF8,IFIH1,RNF19B,LOC100139670,LOC513659,GBP5,LOC512486,GBP4,LOC781710,LOC507055,LOC511531,IRF1,DDX58,IL7R,IFIT3,IFI44L,IFIT5,TRAFD1,DTX3L,IFIT2,OAS1X,SOCS1,IRF7,EIF2AK2,ZBP1,STAT2,LOC112441507,TLR4,CIITA,LOC100298356,NLRC5,SEH1L,PTPN2,TRIM25,ISG20,NOD1,CGAS,ADAR,TRIM5,IL27,PARP9,IFI16,TNF,PMAIP1,RSAD2,MLKL,CXCL9,NMI,PML,HERC5,CXCL10,LOC616948,DHX58,IFITM1,STAT1,RAB20,…
GO:BP	macromolecule metabolic process	GO:0043170	2.92724e-21	20.5335	8374	1397	861	17231	PARP14,MX2,OAS2,OAS1Y,OAS1Z,IRF8,SOCS3,IFIH1,RNF19B,ALAS1,GBP5,IRF1,DDX58,IL7R,ADAM19,DTX3L,ARRDC4,PHACTR2,OAS1X,FAM111B,SOCS1,IRF7,EIF2AK2,STAT2,LOC112441507,UBA7,NAMPT,TLR4,CIITA,LOC100298356,NLRC5,PIM1,PTPN2,TRIM25,ZNFX1,ISG20,NOD1,CHP1,CGAS,ADAR,CDADC1,CD80,DENND3,TRIM5,LAP3,EID2,MAFF,USP18,IL27,SBNO2,FAS,TRAF5,PARP9,APOL3,PLAGL1,TNF,RIPK1,TIMELESS,TLE1,PMAIP1,RSAD2,MLKL,ATAD1,DCUN1D3,EDN1,NM…
GO:BP	ribosome biogenesis	GO:0042254	2.93531e-21	20.5323	290	1397	82	17231	LTV1,BRIX1,RSL1D1,FBL,SDAD1,NOP58,GTPBP4,WDR43,PPAN,RRN3,ABCE1,MPHOSPH10,NOP2,CUL4A,RPF2,NOP56,ERI1,RPL7L1,DDX3X,FTSJ3,RRS1,DKC1,NOL6,PWP2,TSR1,UTP4,NAF1,EXOSC10,SRFBP1,NOL9,WDR12,RPL3,BMS1,MRPS11,LSM6,DDX47,RRP9,RPL26,RRP1,DDX54,RPL24,NOC4L,BYSL,RPL7,UTP15,MRPL1,NOL11,RIOK2,MRTO4,WDR75,ZNHIT6,RCL1,EXOSC3,RRP8,PAK1IP1,UTP20,DIMT1,WDR74,SBDS,NOB1,DDX49,EBNA1BP2,SURF6,RRP1B,RPL27,RPL5,PDCD11,LOC112…
GO:BP	gene expression	GO:0010467	7.16147e-21	20.145	5025	1397	577	17231	PARP14,OAS2,IRF8,IFIH1,GBP5,IRF1,DDX58,IL7R,ADAM19,DTX3L,SOCS1,IRF7,EIF2AK2,STAT2,NAMPT,TLR4,CIITA,NLRC5,PIM1,PTPN2,TRIM25,ZNFX1,NOD1,CHP1,CGAS,ADAR,TRIM5,EID2,MAFF,IL27,SBNO2,TRAF5,PARP9,PLAGL1,TNF,RIPK1,TIMELESS,TLE1,RSAD2,EDN1,NMI,BATF3,PML,ARID5A,EZH2,PNPT1,RICTOR,ARID5B,TOP1,FZD5,NCF1,LOC616948,STAT3,DHX58,STAT1,MYC,SCAMP5,SAMHD1,FFAR2,IL1A,BHLHE40,CREM,AFF1,TRIM21,IKZF4,SRSF10,POLB,TDRD7,TR…
GO:BP	positive regulation of metabolic process	GO:0009893	7.81503e-21	20.1071	2881	1397	377	17231	PARP14,OAS2,IRF8,IFIH1,RNF19B,GBP5,IRF1,DDX58,IL7R,ADAM19,DTX3L,ARRDC4,SOCS1,IRF7,EIF2AK2,NAMPT,TLR4,CIITA,NLRC5,PIM1,PTPN2,TRIM25,NOD1,CHP1,CGAS,ADAR,PLEK,CD80,TRIM5,MAFF,P2RY6,IL27,SBNO2,FAS,TRAF5,PLAGL1,TNF,RIPK1,TLE1,PMAIP1,RSAD2,MLKL,ATAD1,DCUN1D3,EDN1,NMI,PML,ARID5A,EZH2,PNPT1,RICTOR,PTPN1,FZD5,NCF1,LOC616948,STAT3,DHX58,STAT1,SCAMP5,FFAR2,IL1A,TNFSF10,PTGS2,ELOVL5,TRIM21,IKZF4,LCP2,TRIM34,…
GO:BP	rRNA processing	GO:0006364	9.59275e-21	20.0181	184	1397	63	17231	BRIX1,RSL1D1,FBL,GTPBP4,WDR43,PPAN,MPHOSPH10,NOP2,RPF2,ERI1,RPL7L1,FTSJ3,RRS1,DKC1,NOL6,PWP2,TSR1,UTP4,NAF1,EXOSC10,SRFBP1,NOL9,WDR12,BMS1,MRPS11,LSM6,DDX47,RRP9,RPL26,RRP1,DDX54,BYSL,RPL7,UTP15,MRPL1,NOL11,RIOK2,WDR75,ZNHIT6,EXOSC3,RRP8,UTP20,DIMT1,WDR74,SBDS,NOB1,DDX49,EBNA1BP2,RRP1B,RPL27,PDCD11,LOC112448582,RPL7A,YTHDF2,C1D,PES1,RRP36,WDR46,NOL10,RPL14,RPS6,RRP15,RPL35
GO:BP	response to external stimulus	GO:0009605	1.42144e-20	19.8473	1867	1397	273	17231	PARP14,MX2,OAS2,OAS1Y,OAS1Z,IRF8,SOCS3,IFIH1,RNF19B,LOC100139670,LOC513659,GBP5,LOC512486,GBP4,LOC781710,LOC507055,LOC511531,IRF1,DDX58,RHOH,IL7R,IFIT3,IFI44L,IFIT5,TRAFD1,DTX3L,IFIT2,CMPK2,OAS1X,IFI44,SOCS1,CD274,IRF7,EIF2AK2,ZBP1,STAT2,LOC112441507,TLR4,CIITA,LOC100298356,NLRC5,SEH1L,PIM1,PTPN2,TRIM25,ISG20,NOD1,CGAS,ADAR,CD80,GAB1,TRIM5,CEP192,IL27,SBNO2,FAS,PARP9,IFI16,TNF,RIPK1,PMAIP1,RSAD2,…
GO:BP	positive regulation of cellular process	GO:0048522	1.42519e-20	19.8461	4274	1397	508	17231	PARP14,IRF8,SOCS3,RNF19B,GBP5,IRF1,RHOH,IL7R,IFIT5,ADAM19,DTX3L,IFIT2,ARRDC4,SOCS1,CD274,IRF7,EIF2AK2,ZBP1,NAMPT,TLR4,CIITA,NLRC5,SEH1L,PIM1,PTPN2,TRIM25,NOD1,CHP1,CGAS,PLEK,CD80,TRIM5,RAB27A,MAFF,P2RY6,CDKN2AIP,SBNO2,FAS,CD38,LOC784541,TRAF5,PARP9,PLAGL1,TNF,RIPK1,PMAIP1,RSAD2,MLKL,ATAD1,CXCL9,DCUN1D3,EDN1,NMI,PML,ARID5A,EZH2,PNPT1,RICTOR,CXCL10,PTPN1,FZD5,NCF1,LOC616948,STAT3,DHX58,STAT1,TNFSF1…
GO:BP	rRNA metabolic process	GO:0016072	2.23536e-20	19.6507	192	1397	64	17231	BRIX1,RSL1D1,FBL,GTPBP4,WDR43,PPAN,MPHOSPH10,NOP2,RPF2,ERI1,RPL7L1,FTSJ3,RRS1,DKC1,NOL6,PWP2,TSR1,UTP4,NAF1,EXOSC10,SRFBP1,NOL9,WDR12,BMS1,MRPS11,LSM6,DDX47,RRP9,RPL26,RRP1,DDX54,BYSL,RPL7,UTP15,MRPL1,NOL11,RIOK2,WDR75,ZNHIT6,EXOSC3,RRP8,UTP20,DIMT1,WDR74,SBDS,NOB1,DDX49,EBNA1BP2,RRP1B,RPL27,PDCD11,LOC112448582,RPL7A,YTHDF2,C1D,PES1,RRP36,WDR46,NOL10,RPL14,RPS6,XRN1,RRP15,RPL35
GO:BP	positive regulation of macromolecule metabolic process	GO:0010604	3.41058e-20	19.4672	2680	1397	355	17231	PARP14,OAS2,IRF8,IFIH1,RNF19B,GBP5,IRF1,DDX58,IL7R,ADAM19,DTX3L,ARRDC4,SOCS1,IRF7,EIF2AK2,NAMPT,TLR4,CIITA,NLRC5,PIM1,TRIM25,NOD1,CGAS,ADAR,CD80,MAFF,IL27,SBNO2,FAS,TRAF5,PLAGL1,TNF,RIPK1,TLE1,PMAIP1,RSAD2,MLKL,ATAD1,DCUN1D3,EDN1,NMI,PML,ARID5A,EZH2,PNPT1,RICTOR,PTPN1,FZD5,NCF1,STAT3,DHX58,STAT1,SCAMP5,FFAR2,IL1A,TNFSF10,PTGS2,TRIM21,IKZF4,LCP2,PARP3,DAXX,TFEC,IL1B,MED13,KLF7,MAP3K5,HEG1,LRP8,DDX…
GO:BP	cellular nitrogen compound metabolic process	GO:0034641	5.34562e-20	19.272	5426	1397	609	17231	PARP14,OAS1Y,OAS1Z,IRF8,ALAS1,IRF1,DTX3L,PNKD,CMPK2,OAS1X,IRF7,EIF2AK2,STAT2,NAMPT,TLR4,CIITA,NLRC5,PIM1,PTPN2,TRIM25,ZNFX1,ISG20,NOD1,CHP1,CGAS,ADAR,SPTSSA,CTPS1,UMPS,CDADC1,TRIM5,EID2,MAFF,SBNO2,TRAF5,PLAGL1,TNF,RIPK1,TIMELESS,TLE1,EDN1,NMI,VCPIP1,GINS2,BATF3,PML,ARID5A,EZH2,PNPT1,ARID5B,TOP1,FZD5,NCF1,LOC616948,STAT3,STAT1,MYC,SAMHD1,PDK4,IL1A,BHLHE40,CREM,TRIM21,IKZF4,SRSF10,POLB,TRIM34,PARP3…
GO:BP	nucleobase-containing compound metabolic process	GO:0006139	5.63445e-20	19.2491	4629	1397	538	17231	PARP14,OAS1Y,OAS1Z,IRF8,IRF1,DTX3L,CMPK2,OAS1X,IRF7,EIF2AK2,STAT2,NAMPT,TLR4,CIITA,NLRC5,PIM1,PTPN2,TRIM25,ZNFX1,ISG20,NOD1,CHP1,CGAS,ADAR,CTPS1,UMPS,CDADC1,TRIM5,EID2,MAFF,SBNO2,TRAF5,PLAGL1,TNF,RIPK1,TIMELESS,TLE1,EDN1,NMI,VCPIP1,GINS2,BATF3,PML,ARID5A,EZH2,PNPT1,ARID5B,TOP1,FZD5,NCF1,LOC616948,STAT3,STAT1,MYC,SAMHD1,PDK4,IL1A,BHLHE40,CREM,TRIM21,IKZF4,SRSF10,POLB,TRIM34,PARP3,DAXX,TFEC,CMTR2,I…
GO:BP	cellular metabolic process	GO:0044237	6.43253e-20	19.1916	9278	1397	927	17231	PARP14,MX2,OAS1Y,OAS1Z,IRF8,SOCS3,IFIH1,RNF19B,ALAS1,IRF1,RHOH,DTX3L,PNKD,ARRDC4,PHACTR2,CMPK2,OAS1X,FAM111B,SOCS1,IRF7,EIF2AK2,STAT2,LOC112441507,UBA7,NAMPT,TLR4,CIITA,LOC100298356,NLRC5,PIM1,PTPN2,TRIM25,ZNFX1,ISG20,NOD1,CHP1,CGAS,ADAR,SPTSSA,PLEK,CTPS1,UMPS,PNPLA8,CDADC1,CD80,DENND3,TRIM5,PPA1,EID2,MAFF,USP18,CEP192,P2RY6,LPCAT2,SBNO2,FAS,TRAF5,PARP9,PLAGL1,TNF,RIPK1,TIMELESS,TLE1,PMAIP1,MLKL,…
GO:BP	ncRNA processing	GO:0034470	1.83036e-19	18.7375	320	1397	84	17231	ADAR,STAT3,TRMT6,BRIX1,RSL1D1,FBL,ELAC2,INTS4,QTRT2,GTPBP4,WDR43,TRMT13,PPAN,THG1L,MPHOSPH10,RPP25,NOP2,RPF2,ERI1,RPL7L1,GTPBP3,FTSJ3,RRS1,DKC1,NOL6,PWP2,FTSJ1,TSR1,INTS2,UTP4,NAF1,METTL1,EXOSC10,SRFBP1,NOL9,WDR12,BMS1,MRPS11,LSM6,DDX47,RRP9,RPL26,RRP1,DDX54,BYSL,RPL7,UTP15,MRPL1,NOL11,RIOK2,AGO2,WDR75,ZNHIT6,EXOSC3,RRP8,UTP20,DIMT1,WDR74,SBDS,NOB1,DDX49,EBNA1BP2,MRPL44,RRP1B,METTL2A,RPL27,PDCD11…
GO:BP	heterocycle metabolic process	GO:0046483	2.93996e-19	18.5317	4727	1397	544	17231	PARP14,OAS1Y,OAS1Z,IRF8,ALAS1,IRF1,DTX3L,CMPK2,OAS1X,IRF7,EIF2AK2,STAT2,NAMPT,TLR4,CIITA,NLRC5,PIM1,PTPN2,TRIM25,ZNFX1,ISG20,NOD1,CHP1,CGAS,ADAR,CTPS1,UMPS,CDADC1,TRIM5,EID2,MAFF,SBNO2,TRAF5,PLAGL1,TNF,RIPK1,TIMELESS,TLE1,MTHFD2,EDN1,NMI,VCPIP1,GINS2,BATF3,PML,ARID5A,EZH2,PNPT1,ARID5B,TOP1,FZD5,NCF1,LOC616948,STAT3,STAT1,MYC,SAMHD1,PDK4,IL1A,BHLHE40,CREM,TRIM21,IKZF4,SRSF10,POLB,TRIM34,PARP3,DAXX…
GO:BP	regulation of metabolic process	GO:0019222	3.591e-19	18.4448	5430	1397	606	17231	PARP14,OAS2,OAS1Y,OAS1Z,IRF8,SOCS3,IFIH1,RNF19B,GBP5,IRF1,DDX58,RHOH,IL7R,ADAM19,DTX3L,PNKD,ARRDC4,PHACTR2,OAS1X,SOCS1,IRF7,EIF2AK2,STAT2,LOC112441507,NAMPT,TLR4,CIITA,LOC100298356,NLRC5,PIM1,PTPN2,TRIM25,ZNFX1,NOD1,CHP1,CGAS,ADAR,PLEK,CD80,TRIM5,EID2,MAFF,CEP192,P2RY6,IL27,SBNO2,FAS,TRAF5,PARP9,PLAGL1,TNF,RIPK1,TIMELESS,TLE1,PMAIP1,RSAD2,MLKL,ATAD1,DCUN1D3,EDN1,NMI,BATF3,PML,ARID5A,EZH2,PNPT1,RI…
GO:BP	nucleic acid metabolic process	GO:0090304	3.92072e-19	18.4066	4236	1397	499	17231	PARP14,OAS1Y,OAS1Z,IRF8,IRF1,DTX3L,OAS1X,IRF7,EIF2AK2,STAT2,NAMPT,TLR4,CIITA,NLRC5,PIM1,PTPN2,TRIM25,ZNFX1,ISG20,NOD1,CHP1,CGAS,ADAR,CDADC1,TRIM5,EID2,MAFF,SBNO2,TRAF5,PLAGL1,TNF,RIPK1,TIMELESS,TLE1,EDN1,NMI,VCPIP1,GINS2,BATF3,PML,ARID5A,EZH2,PNPT1,ARID5B,TOP1,FZD5,NCF1,LOC616948,STAT3,STAT1,MYC,SAMHD1,IL1A,BHLHE40,CREM,TRIM21,IKZF4,SRSF10,POLB,TRIM34,PARP3,DAXX,TFEC,CMTR2,IL1B,MED13,IRF9,KLF7,MA…
GO:BP	positive regulation of cellular metabolic process	GO:0031325	4.54038e-19	18.3429	2527	1397	336	17231	PARP14,IRF8,RNF19B,IRF1,DTX3L,ARRDC4,SOCS1,IRF7,EIF2AK2,NAMPT,TLR4,CIITA,NLRC5,PIM1,PTPN2,TRIM25,NOD1,CHP1,PLEK,CD80,TRIM5,MAFF,P2RY6,SBNO2,FAS,PLAGL1,TNF,RIPK1,PMAIP1,MLKL,ATAD1,DCUN1D3,EDN1,NMI,PML,ARID5A,EZH2,PNPT1,RICTOR,PTPN1,FZD5,NCF1,LOC616948,STAT3,STAT1,IL1A,TNFSF10,PTGS2,ELOVL5,TRIM21,IKZF4,LCP2,TRIM34,PARP3,DAXX,TFEC,IL1B,MED13,KLF7,MAP3K5,LRP8,BACH1,NUPR1,KDM7A,IRF3,PELI1,LYN,RERE,CFL…
GO:BP	defense response to symbiont	GO:0140546	6.19092e-19	18.2082	197	1397	63	17231	MX2,OAS2,OAS1Y,OAS1Z,IFIH1,LOC100139670,IRF1,DDX58,IFIT3,IFI44L,IFIT5,DTX3L,IFIT2,OAS1X,IRF7,EIF2AK2,ZBP1,LOC112441507,LOC100298356,NLRC5,ISG20,CGAS,ADAR,TRIM5,IL27,PMAIP1,RSAD2,MLKL,CXCL9,HERC5,CXCL10,LOC616948,DHX58,IFITM1,STAT1,SAMHD1,MX1,APOBEC3Z1,ISG15,IRF3,SLFN11,MOV10,IL15,IFITM3,CD40,PTPN22,TICAM2,RNASEL,CNOT7,LOC516599,FGL2,TREX1,IFI6,RIPK3,LOC618737,LOC112441484,AKAP1,TRAF3IP2,LOC112444…
GO:BP	defense response to virus	GO:0051607	6.19092e-19	18.2082	197	1397	63	17231	MX2,OAS2,OAS1Y,OAS1Z,IFIH1,LOC100139670,IRF1,DDX58,IFIT3,IFI44L,IFIT5,DTX3L,IFIT2,OAS1X,IRF7,EIF2AK2,ZBP1,LOC112441507,LOC100298356,NLRC5,ISG20,CGAS,ADAR,TRIM5,IL27,PMAIP1,RSAD2,MLKL,CXCL9,HERC5,CXCL10,LOC616948,DHX58,IFITM1,STAT1,SAMHD1,MX1,APOBEC3Z1,ISG15,IRF3,SLFN11,MOV10,IL15,IFITM3,CD40,PTPN22,TICAM2,RNASEL,CNOT7,LOC516599,FGL2,TREX1,IFI6,RIPK3,LOC618737,LOC112441484,AKAP1,TRAF3IP2,LOC112444…
GO:BP	RNA processing	GO:0006396	6.74667e-19	18.1709	784	1397	146	17231	ADAR,TNF,RIPK1,PNPT1,STAT3,SRSF10,CMTR2,TRMT6,BRIX1,RNGTT,XRN2,RSL1D1,FBL,RBBP6,ELAC2,SLC38A2,RNASEL,INTS4,QTRT2,GTPBP4,WDR43,SUPT4H1,TRMT13,CDC5L,CMTR1,PPAN,THG1L,MPHOSPH10,SRSF7,SYMPK,SRSF6,RPP25,DDX5,BUD31,NOP2,RPF2,MRM3,WBP11,ERI1,RPL7L1,SRRM2,GTPBP3,TRA2B,WTAP,SAFB,FTSJ3,RRS1,DKC1,NOL6,PWP2,PAF1,RBM17,FTSJ1,TSR1,ZPR1,INTS2,UTP4,SAFB2,NAF1,FMR1,METTL1,EXOSC10,SRFBP1,TRA2A,LSM11,HNRNPU,DCPS,NO…
GO:BP	nitrogen compound metabolic process	GO:0006807	8.59343e-19	18.0658	8701	1397	877	17231	PARP14,OAS1Y,OAS1Z,IRF8,SOCS3,IFIH1,RNF19B,ALAS1,IRF1,ADAM19,DTX3L,PNKD,ARRDC4,PHACTR2,CMPK2,OAS1X,SOCS1,IRF7,EIF2AK2,STAT2,LOC112441507,UBA7,NAMPT,TLR4,CIITA,LOC100298356,NLRC5,PIM1,PTPN2,TRIM25,ZNFX1,ISG20,NOD1,CHP1,CGAS,ADAR,SPTSSA,CTPS1,UMPS,PNPLA8,CDADC1,CD80,DENND3,TRIM5,LAP3,EID2,MAFF,USP18,LPCAT2,SBNO2,FAS,TRAF5,PARP9,APOL3,PLAGL1,TNF,RIPK1,TIMELESS,TLE1,PMAIP1,MLKL,MTHFD2,DCUN1D3,EDN1,NM…
GO:BP	metabolic process	GO:0008152	1.17106e-18	17.9314	10242	1397	996	17231	PARP14,MX2,OAS2,OAS1Y,OAS1Z,IRF8,SOCS3,IFIH1,RNF19B,ALAS1,GBP5,IRF1,DDX58,RHOH,IL7R,ADAM19,DTX3L,PNKD,ARRDC4,PHACTR2,CMPK2,OAS1X,FAM111B,SOCS1,IRF7,EIF2AK2,STAT2,LOC112441507,UBA7,NAMPT,TLR4,CIITA,LOC100298356,NLRC5,PIM1,PTPN2,TRIM25,ZNFX1,ISG20,NOD1,CHP1,CGAS,ADAR,SPTSSA,PLEK,CTPS1,UMPS,PNPLA8,CDADC1,CD80,DENND3,TRIM5,LAP3,PPA1,EID2,MAFF,USP18,CEP192,P2RY6,IL27,LPCAT2,SBNO2,FAS,CD38,TRAF5,PARP9,…
GO:BP	regulation of macromolecule metabolic process	GO:0060255	1.26685e-18	17.8973	5047	1397	570	17231	PARP14,OAS2,OAS1Y,OAS1Z,IRF8,SOCS3,IFIH1,RNF19B,GBP5,IRF1,DDX58,IL7R,ADAM19,DTX3L,ARRDC4,PHACTR2,OAS1X,SOCS1,IRF7,EIF2AK2,STAT2,LOC112441507,NAMPT,TLR4,CIITA,LOC100298356,NLRC5,PIM1,PTPN2,TRIM25,ZNFX1,NOD1,CHP1,CGAS,ADAR,CD80,TRIM5,EID2,MAFF,IL27,SBNO2,FAS,TRAF5,PARP9,PLAGL1,TNF,RIPK1,TIMELESS,TLE1,PMAIP1,RSAD2,MLKL,ATAD1,DCUN1D3,EDN1,NMI,BATF3,PML,ARID5A,EZH2,PNPT1,RICTOR,ARID5B,TOP1,PTPN1,FZD5,…
GO:BP	cellular response to cytokine stimulus	GO:0071345	1.43393e-18	17.8435	601	1397	122	17231	PARP14,OAS2,IRF8,SOCS3,LOC100139670,LOC513659,GBP5,LOC512486,GBP4,LOC781710,LOC507055,LOC511531,IRF1,IL7R,IFIT3,IFIT2,IL15RA,SOCS1,IRF7,ZBP1,STAT2,TLR4,NLRC5,PTPN2,TRIM25,ADAR,IL27,SBNO2,FAS,TRAF5,PARP9,IFI16,CSF2RB,TNF,RIPK1,EDN1,NMI,PML,PNPT1,ARID5B,CXCL10,STAT3,IFITM1,STAT1,RAB20,TNFSF13B,SAMHD1,IL1A,PTGS2,DCSTAMP,IL1B,MX1,B3GNT2,ISG15,IL4R,IRF3,LOC783604,IL15,LOC529196,ZFP36,HIF1A,OSM,IFITM3,…
GO:BP	cellular aromatic compound metabolic process	GO:0006725	2.78209e-18	17.5556	4782	1397	545	17231	PARP14,OAS1Y,OAS1Z,IRF8,ALAS1,IRF1,DTX3L,PNKD,CMPK2,OAS1X,IRF7,EIF2AK2,STAT2,NAMPT,TLR4,CIITA,NLRC5,PIM1,PTPN2,TRIM25,ZNFX1,ISG20,NOD1,CHP1,CGAS,ADAR,CTPS1,UMPS,CDADC1,TRIM5,EID2,MAFF,SBNO2,TRAF5,PLAGL1,TNF,RIPK1,TIMELESS,TLE1,MTHFD2,EDN1,NMI,VCPIP1,GINS2,BATF3,PML,ARID5A,EZH2,PNPT1,ARID5B,TOP1,FZD5,NCF1,LOC616948,STAT3,STAT1,MYC,SAMHD1,PDK4,IL1A,BHLHE40,CREM,TRIM21,IKZF4,SRSF10,POLB,TRIM34,PARP3…
GO:BP	organic substance metabolic process	GO:0071704	3.86268e-18	17.4131	9746	1397	956	17231	PARP14,MX2,OAS2,OAS1Y,OAS1Z,IRF8,SOCS3,IFIH1,RNF19B,ALAS1,GBP5,IRF1,DDX58,IL7R,ADAM19,DTX3L,PNKD,ARRDC4,PHACTR2,CMPK2,OAS1X,FAM111B,SOCS1,IRF7,EIF2AK2,STAT2,LOC112441507,UBA7,NAMPT,TLR4,CIITA,LOC100298356,NLRC5,PIM1,PTPN2,TRIM25,ZNFX1,ISG20,NOD1,CHP1,CGAS,ADAR,SPTSSA,PLEK,CTPS1,UMPS,PNPLA8,CDADC1,CD80,DENND3,TRIM5,LAP3,EID2,MAFF,USP18,P2RY6,IL27,LPCAT2,SBNO2,FAS,TRAF5,PARP9,APOL3,PLAGL1,TNF,RIPK1…
GO:BP	positive regulation of nitrogen compound metabolic process	GO:0051173	6.04918e-18	17.2183	2385	1397	318	17231	PARP14,IRF8,RNF19B,IRF1,DTX3L,ARRDC4,SOCS1,IRF7,EIF2AK2,NAMPT,TLR4,CIITA,NLRC5,PIM1,TRIM25,NOD1,CD80,MAFF,SBNO2,FAS,PLAGL1,TNF,RIPK1,PMAIP1,MLKL,DCUN1D3,EDN1,NMI,PML,ARID5A,EZH2,PNPT1,RICTOR,PTPN1,FZD5,NCF1,STAT3,STAT1,IL1A,TNFSF10,PTGS2,TRIM21,IKZF4,LCP2,PARP3,DAXX,TFEC,IL1B,MED13,KLF7,MAP3K5,LRP8,BACH1,NUPR1,KDM7A,IRF3,PELI1,LYN,RERE,CFLAR,CDKN1A,TCF7L2,BIRC3,MOV10,XBP1,CASP8,TGFBR1,IL15,S1PR2,…
GO:BP	ribonucleoprotein complex biogenesis	GO:0022613	6.55456e-18	17.1835	405	1397	94	17231	ADAR,LTV1,BRIX1,RSL1D1,FBL,SDAD1,NOP58,GTPBP4,WDR43,PPAN,RRN3,ABCE1,MPHOSPH10,SRSF6,NOP2,CUL4A,RPF2,NOP56,ERI1,RPL7L1,DDX3X,FTSJ3,RRS1,DKC1,NOL6,PWP2,TSR1,UTP4,NAF1,EXOSC10,SRFBP1,NOL9,WDR12,RPL3,BMS1,MRPS11,LSM6,NUFIP1,DDX47,RRP9,RPL26,RRP1,DDX54,EIF2S2,RPL24,NOC4L,BYSL,RPL7,UTP15,MRPL1,NOL11,RIOK2,EIF5,AGO2,MRTO4,WDR75,ZNHIT6,PRPF19,RCL1,EXOSC3,RRP8,PAK1IP1,UTP20,DIMT1,WDR74,SBDS,NOB1,DDX49,EBN…
GO:BP	innate immune response	GO:0045087	7.69132e-18	17.114	492	1397	106	17231	PARP14,OAS2,OAS1Y,OAS1Z,IRF8,IFIH1,RNF19B,LOC100139670,LOC513659,GBP5,LOC512486,GBP4,LOC781710,LOC507055,LOC511531,IRF1,DDX58,TRAFD1,OAS1X,SOCS1,IRF7,ZBP1,STAT2,LOC112441507,TLR4,CIITA,LOC100298356,NLRC5,PTPN2,TRIM25,CGAS,ADAR,TRIM5,PARP9,IFI16,NMI,PML,CXCL10,LOC616948,DHX58,IFITM1,STAT1,RAB20,SAMHD1,FFAR2,TRIM21,TIFA,TRIM34,TIRAP,MX1,LRP8,APOBEC3Z1,ISG15,IRF3,LYN,KYNU,C2,ALPK1,LOC783604,IFITM3,C…
GO:BP	RNA metabolic process	GO:0016070	8.46676e-18	17.0723	3815	1397	455	17231	PARP14,OAS1Y,OAS1Z,IRF8,IRF1,DTX3L,OAS1X,IRF7,EIF2AK2,STAT2,NAMPT,TLR4,CIITA,NLRC5,PIM1,PTPN2,TRIM25,ZNFX1,ISG20,NOD1,CHP1,ADAR,TRIM5,EID2,MAFF,SBNO2,TRAF5,PLAGL1,TNF,RIPK1,TIMELESS,TLE1,EDN1,NMI,BATF3,PML,ARID5A,EZH2,PNPT1,ARID5B,FZD5,NCF1,LOC616948,STAT3,STAT1,MYC,IL1A,BHLHE40,CREM,TRIM21,IKZF4,SRSF10,TRIM34,DAXX,TFEC,CMTR2,IL1B,MED13,IRF9,KLF7,MAP3K5,TRMT6,LRP8,DDX21,PARP10,BRIX1,BACH1,APOBEC3…
GO:BP	organic cyclic compound metabolic process	GO:1901360	2.87255e-16	15.5417	4933	1397	550	17231	PARP14,OAS1Y,OAS1Z,IRF8,ALAS1,IRF1,DTX3L,PNKD,CMPK2,OAS1X,IRF7,EIF2AK2,STAT2,NAMPT,TLR4,CIITA,NLRC5,PIM1,PTPN2,TRIM25,ZNFX1,ISG20,NOD1,CHP1,CGAS,ADAR,CTPS1,UMPS,CDADC1,TRIM5,EID2,MAFF,SBNO2,TRAF5,PLAGL1,TNF,RIPK1,TIMELESS,TLE1,MTHFD2,EDN1,NMI,VCPIP1,GINS2,BATF3,PML,ARID5A,EZH2,PNPT1,ARID5B,TOP1,FZD5,NCF1,LOC616948,STAT3,STAT1,MYC,SAMHD1,PDK4,IL1A,BHLHE40,CREM,TRIM21,IKZF4,SRSF10,POLB,TRIM34,PARP3…
[truncated: 459 more rows]

## Sheet: Leukocyte ISGs GO
source	term_name	term_id	adjusted_p_value	negative_log10_of_adjusted_p_value	term_size	query_size	intersection_size	effective_domain_size	intersections
[truncated: 502 more rows]

## Sheet: Alveolar macrophage MB-up GO
source	term_name	term_id	adjusted_p_value	negative_log10_of_adjusted_p_value	term_size	query_size	intersection_size	effective_domain_size	intersections
[truncated: 790 more rows]

## Sheet: BMDM LPS-up GO
source	term_name	term_id	adjusted_p_value	negative_log10_of_adjusted_p_value	term_size	query_size	intersection_size	effective_domain_size	intersections
[truncated: 977 more rows]
