# Supplementary material for: Ruminant-specific retrotransposons shape regulatory evolution of bovine immunity
Source: HighWire-hosted journal article supplement (doi:10.1101/gr.276241.121), 2022-08-01
Supplement: Supplemental_Table_S3.xlsx [file Supplemental_Table_S3.xlsx]

## Sheet: Description
Supplemental Table S3
MDBK ATAC-seq alignment statistics
Description of "Alignment summary" columns:
Sample	Sample name
Number of reads	Number of reads
Number of total aligned fragments	Raw number of fragments after alignment, i.e. before filtering
Number of unique fragments post-filter	Number of fragments after removing fragments with QUAL < 10 or mapping to chrM and removing duplicates
Number of peaks	Number of narrowPeaks called by MACS2 v2.1.1
FRIP	Fraction of reads in called peak regions
TSS enrichment score	Enrichment score corresponding to signal around transcriptional start sites (using complete RefSeq for bosTau9)
ATAC-seq data source
	Accession
MDBK	GSE185082
For a list of raw peaks, see GEO

## Sheet: Alignment summary
Sample	Number of reads	Number of total aligned fragments	Number of unique fragments post-filter	Number of peaks	FRIP	TSS enrichment score
MDBK UT rep1	32096958	30207481	21537873	26456	0.0393594	2.19
MDBK UT rep2	20371077	19669371	15617830	108096	0.427197	4.05
MDBK IFNG 4h rep1	30915907	21537873	19662917	128832	0.351068	3.87
MDBK IFNG 4h rep1	19095381	15617830	15341796	112363	0.572823	3.87
