# Supplementary material for: Ruminant-specific retrotransposons shape regulatory evolution of bovine immunity
Source: HighWire-hosted journal article supplement (doi:10.1101/gr.276241.121), 2022-08-01
Supplement: Supplemental_Table_S4.xlsx [file Supplemental_Table_S4.xlsx]

## Sheet: Description
Supplemental Table S4
MDBK CUT&RUN alignment statistics and DESeq2 results
Sheets
Alignment summary	Alignment statistics for each sample
H3K27ac IFNG 2h vs UT	DESeq2 output for H3K27ac-marked regions
POL2RA IFNG 2h vs UT	DESeq2 output for POL2RA-bound regions
STAT1 IFNG 2h vs UT	DESeq2 output for STAT1-bound regions
pSTAT1 IFNG 2h vs UT	DESeq2 output for pSTAT1-bound regions
Description of "Alignment summary" columns:
Sample	Pulldown
Number of total aligned fragments	Number of reads
Number of total aligned fragments	Raw number of fragments after alignment, i.e. before filtering (note only merged values are shown for IgG)
Number of fragments post-filter	Number of fragments after removing fragments with QUAL < 10 or mapping to chrM
Number of <=150bp fragments	Number of filtered fragments that are less than or equal to 150bp in length
Number of >150bp fragments	Number of filtered fragments that are greater than 150bp in length
Number of peaks	Number of merged narrowPeaks called by MACS2 v2.1.1
FRIP	Fraction of reads in called peak regions
ATAC-seq data source
	Accession
MDBK	GSE185082
For a list of raw peaks before DESeq2 analysis, see GEO

## Sheet: Alignment summary
Sample	Number of reads	Number of total aligned fragments	Number of fragments post-filter	Number of <=150bp fragments	Number of >150bp fragments	Number of peaks	FRIP
UT IgG rep1+rep2	10497571	10282454	8.55922e+06	n.d.	n.d.	n.d.	n.d.
IFNG 2h IgG rep1+rep2	11660576	11268029	9469733	n.d.	n.d.	n.d.	n.d.
UT H3K27ac rep1	28405573	25703515	20518851	n.d.	n.d.	55397	0.336463
UT H3K27ac rep2	35693125	31249911	2.50965e+07	n.d.	n.d.	66885	0.480897
IFNG 2h H3K27ac rep1	30745740	27384992	2.21594e+07	n.d.	n.d.	69059	0.474565
IFNG 2h H3K27ac rep1	33397246	29485507	24707847	n.d.	n.d.	66774	0.477132
UT POL2RA rep1	23553019	23442172	20468446	3.27433e+06	1.71941e+07	45454	0.110896
UT POL2RA rep2	28620444	28315105	24924620	3.55859e+06	2.1366e+07	53741	0.142704
IFNG 2h POL2RA rep1	26652451	26159128	23853098	3.13181e+06	2.07213e+07	97712	0.304864
IFNG 2h POL2RA rep2	50069791	48722021	43191731	7535932	35655799	75485	0.177601
UT STAT1 rep1	50982826	50290898	4.33611e+07	6564381	3.67968e+07	42837	0.0850803
UT STAT1 rep2	22087678	21699504	18549662	3.12117e+06	1.54285e+07	57191	0.0618923
IFNG 2h STAT1 rep1	40732535	40134535	34114282	6422259	27692023	25626	0.0460798
IFNG 2h STAT1 rep2	24241784	22853961	19835237	3.14825e+06	1.6687e+07	43319	0.049202
UT pSTAT1 rep1	32513084	32240792	2.46878e+07	3.60507e+06	21082743	17396	0.0195755
UT pSTAT1 rep2	38880808	38132243	2.73789e+07	4976748	2.24022e+07	29729	0.0424306
IFNG 2h pSTAT1 rep1	33716581	33290023	2.36957e+07	3.98189e+06	19713759	28154	0.037282
IFNG 2h pSTAT1 rep2	37651850	37003000	2.65925e+07	4817934	2.17745e+07	22139	0.035216

## Sheet: H3K27ac IFNG 2h vs UT
coordinates	baseMean	log2FoldChange	lfcSE	stat	pvalue	padj	MDBK_UT_H3K27ac_R1	MDBK_UT_H3K27ac_R2	MDBK_IFNG_2h_H3K27ac_R1	MDBK_IFNG_2h_H3K27ac_R2
chr1:78989181-78999520	3011.67	1.6486	0.0713945	23.0914	5.65269e-118	3.25487e-113	1484.19	1431.81	4404.61	4726.07
chr8:107077216-107084741	2722.97	1.59918	0.0700843	22.818	3.04141e-115	8.75637e-111	1347.79	1354.67	4123.11	4066.33
chr28:17944034-17953352	2512.81	1.6927	0.0751069	22.5372	1.79457e-112	3.44443e-108	1162.77	1209.71	3734.47	3944.28
chr5:94979766-94981450	617.185	3.75298	0.169074	22.1972	3.65564e-109	5.26239e-105	95.885	77.1432	1170.8	1124.92
chr5:36614828-36617098	1438.23	2.2731	0.102915	22.0871	4.20202e-108	4.83913e-104	449.714	530.677	2454.58	2317.93
chr2:106356701-106361657	1799.24	1.89023	0.0879862	21.4833	2.23062e-102	2.14069e-98	738.719	787.539	2739	2931.68
chr2:124345655-124349357	2501.42	1.54541	0.073854	20.9252	3.15687e-97	2.5968e-93	1234.35	1314.83	3731.55	3724.96
chr7:43608739-43612180	1087.76	2.21246	0.109806	20.1488	2.75957e-90	1.98623e-86	379.488	391.65	1853.6	1726.29
chr5:5432227-5439642	4259.71	1.22878	0.0610785	20.1181	5.12047e-90	3.27602e-86	2499.76	2592.35	6116.97	5829.76
chr7:51722819-51726569	969.074	2.28568	0.114012	20.0476	2.11608e-89	1.21846e-85	334.922	325.527	1616.91	1598.94
chr5:104170441-104176774	5237.09	1.05727	0.0544216	19.4274	4.53071e-84	2.37166e-80	3389.74	3408.71	7128.02	7021.89
chr3:102026408-102037304	5137.34	1.05575	0.0547039	19.2993	5.44489e-83	2.61269e-79	3328.96	3345.13	6892.31	6982.98
chr13:17549296-17552122	870.434	2.22284	0.11952	18.5981	3.33102e-77	1.47541e-73	298.459	314.507	1439.63	1429.14
chr5:29644632-29648921	1383.4	1.84195	0.101169	18.2066	4.57715e-74	1.88255e-70	572.609	630.709	2271.46	2058.81
chr18:14706432-14710239	1757.26	1.534	0.0865992	17.7138	3.2837e-70	1.22291e-66	935.891	871.464	2674.71	2546.98
chr3:105749310-105753255	998.202	2.02091	0.1141	17.7118	3.39808e-70	1.22291e-66	379.488	407.757	1668.53	1537.03
chr3:48629481-48635355	2583.3	1.24957	0.0712744	17.5319	8.18604e-69	2.77271e-65	1527.41	1531.84	3573.75	3700.2
chr11:101318429-101324038	1345.37	1.78721	0.103465	17.2737	7.42907e-67	2.37652e-63	660.391	554.414	2069.83	2096.84
chr19:7735498-7741807	4184.96	0.996194	0.0585946	17.0015	8.00889e-65	2.42716e-61	2768.51	2819.54	5570.53	5581.25
chr5:100453038-100457864	3488.63	1.13806	0.0674806	16.865	8.13875e-64	2.34319e-60	2075.71	2277	4843.9	4757.9
chr25:20136967-20146762	2970.42	1.22917	0.0729256	16.8552	9.61472e-64	2.63631e-60	1860.98	1698	4043.24	4279.46
chr21:23197030-23199940	906.148	1.91356	0.115535	16.5627	1.29684e-61	3.39423e-58	379.488	380.63	1469.83	1394.65
chr5:19568370-19582977	5516.47	0.879682	0.0537198	16.3754	2.86719e-60	7.17808e-57	3835.4	3931.76	7101.72	7196.99
chr1:2342576-2351001	3156.15	1.06029	0.0653094	16.2349	2.85928e-59	6.86001e-56	2043.29	2048.11	4321.82	4211.36
chr12:18872714-18878160	1867.37	1.33018	0.0820368	16.2144	3.98756e-59	9.18431e-56	1085.8	1041.86	2625.04	2716.78
chr19:10603648-10608999	2389.78	1.32219	0.0821098	16.1027	2.44021e-58	5.40422e-55	1281.62	1442.83	3547.45	3287.2
chr11:103610777-103614676	2040.51	1.27524	0.0792073	16.1	2.55181e-58	5.44207e-55	1210.04	1177.49	2954.26	2820.25
chr29:25750836-25754854	1816.17	1.29323	0.082696	15.6384	3.98569e-55	8.19642e-52	1049.33	1055.42	2637.7	2522.22
chr27:16290370-16295195	1015.59	1.65712	0.10761	15.3993	1.65436e-53	3.28482e-50	498.332	480.662	1561.39	1522
chr19:61829683-61832847	1147.54	1.50864	0.102855	14.6676	1.03886e-48	1.99395e-45	568.557	622.232	1688.99	1710.37
chr2:16253666-16258347	1574.32	1.28956	0.0879999	14.6541	1.26834e-48	2.28227e-45	906.18	921.48	2180.88	2288.75
chr7:49078339-49081281	1838.67	1.19824	0.0817646	14.6548	1.25519e-48	2.28227e-45	1089.85	1140.19	2581.21	2543.44
chr9:29512097-29515076	654.662	2.19066	0.151424	14.4671	1.95626e-47	3.41343e-44	233.635	236.516	1195.15	953.349
chr3:67145882-67148181	404.339	2.54268	0.175992	14.4477	2.5902e-47	4.38666e-44	116.142	120.377	685.724	695.114
chr22:59785884-59788876	2707.51	1.00649	0.0700837	14.3612	9.06124e-47	1.49073e-43	1811.01	1788.71	3695.51	3534.82
chr14:14849911-14856468	6733.21	0.747313	0.0529016	14.1265	2.609e-45	4.17302e-42	4875.28	5172.83	8380.64	8504.09
chr11:101090526-101098115	4006.6	0.87382	0.0619316	14.1094	3.32239e-45	5.17044e-42	2790.12	2866.17	5043.58	5326.55
chr13:61178821-61187086	3623.96	0.905762	0.0643475	14.0761	5.32703e-45	8.07199e-42	2436.29	2603.37	4674.42	4781.78
chr25:24885991-24892101	770.746	1.72943	0.123178	14.0401	8.85784e-45	1.3078e-41	370.035	345.873	1167.87	1199.2
chr20:25778791-25782456	895.373	1.64879	0.118312	13.936	3.82952e-44	5.51269e-41	402.447	460.316	1327.62	1391.11
chr1:53211175-53214020	891.824	1.65219	0.118643	13.9258	4.41737e-44	6.20381e-41	397.045	460.316	1366.58	1343.36
chr18:51138588-51141656	591.054	2.14413	0.154328	13.8934	6.95021e-44	9.52857e-41	237.687	200.911	1041.25	884.369
chr11:15680574-15682811	318.218	3.00121	0.216249	13.8785	8.5574e-44	1.14592e-40	78.3286	64.4273	613.645	516.471
chr24:60885377-60888039	681.924	1.8179	0.131049	13.8719	9.37829e-44	1.2273e-40	303.861	299.248	1031.51	1093.08
chr7:96059763-96064534	948.022	1.63357	0.117887	13.8571	1.15204e-43	1.47413e-40	457.817	466.25	1335.41	1532.61
chr10:7754459-7757338	801.888	1.69586	0.122628	13.8293	1.69558e-43	2.12246e-40	356.53	397.584	1202.94	1250.5
chr7:1553992-1556404	648.088	2.03442	0.147798	13.7648	4.14801e-43	5.08185e-40	289.005	223.8	1080.21	999.337
chr7:21928177-21935015	3542.74	0.878354	0.0639132	13.7429	5.61566e-43	6.73657e-40	2561.88	2434.67	4649.09	4525.31
chr2:120671035-120685808	6026.41	0.847243	0.0619999	13.6652	1.63785e-42	1.92467e-39	4036.62	4565.01	7782.58	7721.42
chr5:57479461-57487634	1205.87	1.35922	0.0995826	13.6491	2.04251e-42	2.35219e-39	648.236	701.918	1733.79	1739.55
chr24:44505924-44510159	1194.21	1.35764	0.0996104	13.6294	2.67595e-42	3.02125e-39	686.05	656.141	1755.22	1679.42
chr22:45628132-45630368	695.274	1.75581	0.12938	13.5709	5.95454e-42	6.59362e-39	324.118	311.964	1099.69	1045.32
chr13:21459720-21462791	426.137	2.27276	0.168467	13.4908	1.77142e-41	1.92453e-38	148.554	144.114	686.698	725.182
chr14:2970050-2974401	2272.55	1.15092	0.0853403	13.4862	1.88611e-41	2.01118e-38	1292.42	1522.52	3167.58	3107.67
chr12:2369867-2375626	1178.43	1.37345	0.10229	13.4271	4.19749e-41	4.39447e-38	633.381	677.334	1642.23	1760.78
chr25:37819926-37823017	1015.04	1.50191	0.111928	13.4186	4.7081e-41	4.84102e-38	561.805	501.007	1443.53	1553.84
chr15:38380733-38390345	2369.78	0.99514	0.0743552	13.3836	7.53947e-41	7.61632e-38	1628.69	1541.17	3200.7	3108.56
chrX:87200350-87204399	770.997	1.71826	0.128844	13.336	1.42989e-40	1.41956e-37	352.478	365.371	1263.33	1102.81
chr5:74681719-74686659	742.026	1.66713	0.125057	13.331	1.52901e-40	1.49224e-37	370.035	342.482	1119.17	1136.41
chr5:97312092-97319109	2285	0.985652	0.0739635	13.3262	1.63009e-40	1.56437e-37	1517.95	1547.95	3000.04	3074.07
chr1:38690152-38692505	779.591	1.61037	0.120862	13.324	1.67864e-40	1.58455e-37	376.787	391.65	1173.72	1176.21
chr20:28550441-28552929	588.804	1.86253	0.141547	13.1584	1.52367e-39	1.41507e-36	239.037	267.034	921.442	927.703
chr5:27020728-27029005	7913.99	0.665961	0.050861	13.0937	3.57593e-39	3.26835e-36	6155.54	6084.99	9433.58	9981.87
chr7:21996741-22005865	2755.4	1.12664	0.0866448	13.003	1.17703e-38	1.05897e-35	1565.22	1888.74	3641.94	3925.71
chr2:95658430-95661210	706.96	1.65729	0.128051	12.9424	2.59266e-38	2.29674e-35	355.179	327.223	1085.08	1060.36
chr5:32231942-32236885	2514.51	0.940171	0.0729176	12.8936	4.89076e-38	4.26689e-35	1758.34	1690.37	3223.1	3386.25
chr11:96195038-96199688	603.085	1.80916	0.14158	12.7784	2.16499e-37	1.86063e-34	284.954	252.623	969.17	905.594
chr10:73282266-73284910	975.653	1.41211	0.110657	12.7611	2.70476e-37	2.28315e-34	511.837	551.871	1461.06	1377.85
chr13:54051251-54054795	954.927	1.44336	0.113115	12.7602	2.73593e-37	2.28315e-34	518.589	508.637	1465.93	1326.55
chr3:21395919-21400219	1496.63	1.13004	0.0885852	12.7565	2.86723e-37	2.35854e-34	934.541	942.673	2023.08	2086.23
chr2:24892567-24896125	796.825	1.53008	0.121249	12.6193	1.65257e-36	1.34023e-33	394.344	423.864	1151.32	1217.78
chr19:28638221-28641735	345.42	2.40036	0.191364	12.5435	4.31754e-36	3.45289e-33	118.843	102.575	604.879	555.384
chr3:100203600-100207636	1213.44	1.21639	0.0970383	12.5352	4.79161e-36	3.77953e-33	721.163	738.371	1700.67	1693.57
chr19:35796320-35799611	662.116	1.76294	0.141018	12.5016	7.31954e-36	5.69549e-33	336.273	270.425	996.443	1045.32
chr7:17771670-17774174	497.91	1.94389	0.155799	12.477	9.9733e-36	7.65697e-33	203.924	206.846	745.141	835.728
chr19:28287079-28290484	1099.34	1.31084	0.105301	12.4484	1.4263e-35	1.08063e-32	657.69	607.821	1616.91	1514.92
chr2:104934487-104936666	680.962	1.70674	0.13737	12.4244	1.92779e-35	1.44161e-32	306.562	330.614	1119.17	967.499
chr5:108102106-108113727	4288.1	0.76443	0.0617558	12.3783	3.42619e-35	2.52927e-32	3071.02	3279.01	5512.09	5290.29
chr15:7888787-7891338	421.443	2.32735	0.188372	12.3551	4.57152e-35	3.33206e-32	110.74	165.307	730.53	679.195
chr17:13192698-13194962	613.782	1.81338	0.146794	12.3532	4.6789e-35	3.3677e-32	271.449	272.121	1042.22	869.334
chr29:37215607-37218303	804.913	1.48103	0.119957	12.3463	5.10069e-35	3.62596e-32	409.199	438.275	1213.65	1158.52
chr1:52649630-52652821	2753.4	0.861808	0.0699492	12.3205	7.02648e-35	4.93404e-32	1978.47	1931.97	3639.99	3463.19
chr26:11362317-11364981	588.858	1.7253	0.140059	12.3184	7.21521e-35	5.00553e-32	274.15	272.968	871.766	936.546
chr25:18684851-18689433	685.8	1.59352	0.130199	12.2392	1.91984e-34	1.31602e-31	345.726	337.396	1070.47	989.609
chr29:41486007-41488252	591.233	1.72193	0.142122	12.1159	8.70548e-34	5.8973e-31	272.799	277.207	857.155	957.771
chr15:38072544-38084719	3106.58	0.808583	0.0671694	12.038	2.24458e-33	1.50285e-30	2195.9	2316.84	3893.24	4020.34
chr13:69117195-69118790	197.413	3.56027	0.296681	12.0004	3.53749e-33	2.34129e-30	37.8138	25.4318	407.149	319.257
chr3:34549099-34552180	1401.66	1.13291	0.0945451	11.9827	4.37822e-33	2.8648e-30	830.553	921.48	1946.13	1908.47
chr3:83533967-83537286	445.401	1.91459	0.160957	11.895	1.25654e-32	8.12951e-30	185.017	188.196	725.66	682.733
chr7:61752942-61756863	1814.76	0.972139	0.0818427	11.8781	1.53743e-32	9.83631e-30	1227.6	1223.27	2457.5	2350.65
chr11:78890527-78893530	874.882	1.3412	0.11318	11.8501	2.14842e-32	1.35943e-29	494.28	495.921	1272.1	1237.23
chr13:61718005-61721734	1795.09	0.982702	0.0830606	11.8312	2.69401e-32	1.68613e-29	1164.12	1245.31	2399.06	2371.88
chr14:41942801-41945241	234.714	2.82291	0.239593	11.7821	4.82781e-32	2.98914e-29	60.7722	55.95	438.318	383.816
chr25:9501014-9504009	443.51	1.92934	0.164088	11.7579	6.43112e-32	3.93947e-29	174.214	193.282	734.426	672.12
chr15:62720397-62723079	991.467	1.28901	0.11034	11.6821	1.57357e-31	9.53764e-29	573.959	577.302	1475.67	1338.93
chr14:73942100-73943938	269.37	2.48417	0.21305	11.66	2.03962e-31	1.22337e-28	81.0295	82.2296	458.773	455.45
chr20:67284386-67286620	487.032	2.07243	0.177786	11.6569	2.11627e-31	1.25626e-28	151.255	218.714	840.596	737.563
chr4:66455738-66458143	646.929	1.59327	0.136761	11.65	2.2951e-31	1.34851e-28	294.407	346.721	980.858	965.731
chr21:67776124-67778227	568.314	1.63841	0.140668	11.6473	2.36814e-31	1.37737e-28	271.449	280.598	876.636	844.572
chr1:80092664-80094942	263.746	2.60676	0.224646	11.6038	3.93962e-31	2.26847e-28	86.4315	64.4273	445.136	458.987
chr12:27840675-27850212	2493.63	0.939604	0.0813146	11.5552	6.95119e-31	3.96294e-28	1642.2	1771.75	3471.48	3089.1
chr16:1525013-1528025	1473.82	1.04498	0.0906513	11.5274	9.59649e-31	5.41741e-28	980.457	945.216	2042.56	1927.04
chr11:72666407-72668003	257.999	2.52273	0.219373	11.4997	1.32366e-30	7.39975e-28	71.5761	80.5341	441.24	438.647
chr6:88192009-88197488	1582.08	1.07397	0.0934119	11.4971	1.36425e-30	7.55334e-28	950.747	1082.55	2090.29	2204.73
chr15:26814758-26817297	475.095	1.80224	0.157089	11.4727	1.8094e-30	9.92256e-28	217.429	206.846	702.283	773.823
chr19:21709393-21713099	618.459	1.5422	0.134698	11.4493	2.37113e-30	1.28804e-27	313.314	318.746	899.039	942.737
chr7:21936726-21952632	2717.9	0.785325	0.0686036	11.4473	2.42635e-30	1.30572e-27	2024.39	1969.27	3431.54	3446.38
chr3:86858877-86861946	1154.19	1.15021	0.100597	11.4339	2.8324e-30	1.51012e-27	692.803	739.218	1567.23	1617.51
chr1:81632724-81635770	604.681	1.59352	0.139682	11.4082	3.80433e-30	2.0097e-27	313.314	289.923	949.689	865.797
chr10:88772972-88775628	327.468	2.33032	0.204489	11.3958	4.38535e-30	2.29557e-27	129.647	90.7069	537.67	551.846
chr5:70638429-70642619	3006.63	0.835663	0.0735298	11.365	6.24983e-30	3.24209e-27	2089.21	2225.28	4038.37	3673.67
chr24:567514-569653	627.555	1.54356	0.136101	11.3413	8.18909e-30	4.21014e-27	341.675	301.791	930.208	936.546
chr13:81364539-81368486	2015.06	0.875193	0.0774067	11.3064	1.21958e-29	6.21458e-27	1419.37	1424.18	2639.65	2577.05
chr11:59075208-59078798	1105.48	1.18161	0.104663	11.2896	1.47631e-29	7.45677e-27	714.41	641.73	1552.62	1513.15
chr11:19512552-19514903	376.977	2.03878	0.180882	11.2713	1.81773e-29	9.10146e-27	163.41	133.941	584.424	626.133
chr1:89827394-89829405	280.5	2.40909	0.214126	11.2508	2.29517e-29	1.13929e-26	75.6276	100.032	471.435	474.906
chr28:45333404-45337147	1917.25	0.885879	0.0788975	11.2282	2.96348e-29	1.45846e-26	1361.3	1332.63	2493.54	2481.54
chr3:77165776-77168245	475.195	1.89173	0.168974	11.1954	4.29519e-29	2.09594e-26	220.13	185.652	676.958	818.041
chr3:57796858-57801080	897.889	1.51162	0.135068	11.1915	4.48586e-29	2.17059e-26	391.643	534.916	1358.79	1306.21
chr27:16765476-16771768	3146.45	0.808354	0.0722797	11.1837	4.90028e-29	2.35136e-26	2149.98	2417.72	3962.39	4055.71
chr5:82609677-82613080	2694.41	0.772581	0.0691724	11.1689	5.78716e-29	2.75397e-26	2008.18	1972.66	3347.78	3449.04
chr3:15380175-15384827	1053.68	1.15418	0.103887	11.11	1.12185e-28	5.29484e-26	669.844	638.339	1436.71	1469.82
chr11:92587567-92592616	1274.91	1.21868	0.109965	11.0824	1.52719e-28	7.14935e-26	852.161	686.659	1742.56	1818.26
chr19:21979222-21993035	3950.17	0.779386	0.0705763	11.0432	2.36539e-28	1.0984e-25	2700.98	3106.92	4989.03	5003.76
chr6:101460950-101463035	289.068	2.29252	0.207629	11.0414	2.41217e-28	1.11116e-25	106.689	90.7069	453.903	504.975
chr14:72396862-72402637	2592.42	0.814727	0.0741496	10.9876	4.38386e-28	2.00339e-25	1808.31	1946.38	3217.25	3397.74
chr3:51775966-51779884	781.835	1.37287	0.125006	10.9824	4.6431e-28	2.10515e-25	460.518	412.843	1178.59	1075.39
chr24:39817665-39821106	616.352	1.49041	0.136041	10.9556	6.2489e-28	2.81108e-25	340.324	308.573	922.416	894.097
chr5:104027839-104031694	1834.97	0.907843	0.0829701	10.9418	7.27346e-28	3.24661e-25	1296.47	1257.18	2315.29	2470.93
chr14:7064641-7070536	4856.9	0.653221	0.059853	10.9137	9.90902e-28	4.38901e-25	3631.47	3913.96	5848.14	6034.05
chr4:9616523-9619889	1901.09	0.882895	0.0811327	10.8821	1.40281e-27	6.16606e-25	1318.08	1354.67	2396.14	2535.49
chr18:55305383-55309985	5327.42	0.590819	0.0543944	10.8618	1.75328e-27	7.64817e-25	4204.08	4297.13	6322.49	6485.96
chr15:51623898-51627088	424.139	1.88141	0.173487	10.8447	2.11409e-27	9.15272e-25	193.12	170.393	723.712	609.33
chr10:20991185-20994043	462.948	1.67563	0.154707	10.831	2.45567e-27	1.05523e-24	220.13	221.257	709.101	701.304
chr26:9885579-9890557	2732.94	0.924151	0.0854843	10.8108	3.06084e-27	1.30553e-24	1698.92	2065.06	3611.74	3556.05
chr19:53821036-53824481	1431.37	1.07706	0.0996543	10.808	3.15529e-27	1.33592e-24	841.357	994.384	1914.96	1974.8
chr19:14891497-14899963	3892.27	0.677851	0.062792	10.7952	3.6277e-27	1.52472e-24	2884.65	3098.44	4797.15	4788.86
chr19:18137849-18142120	936.931	1.42848	0.132846	10.7529	5.74477e-27	2.39702e-24	426.756	582.389	1360.73	1377.85
chr14:57420254-57421736	301.85	2.26634	0.211535	10.7138	8.76899e-27	3.63257e-24	124.245	86.4682	489.942	506.743
chr23:1972967-1974876	364.849	1.89477	0.1769	10.7109	9.04419e-27	3.71981e-24	147.204	161.068	582.476	568.649
chr18:14379610-14385463	1939.77	0.876318	0.0818438	10.7072	9.41651e-27	3.84548e-24	1372.1	1363.99	2610.43	2412.56
chr10:35075060-35078241	511.895	1.58096	0.147839	10.6938	1.08813e-26	4.41235e-24	251.192	261.1	787.998	747.292
chr8:98162724-98168286	1607.77	0.923571	0.086421	10.6869	1.17244e-26	4.72101e-24	1107.4	1112.22	2162.37	2049.08
chr6:113418540-113423011	2688.59	0.76746	0.0718635	10.6794	1.27075e-26	5.08133e-24	1960.91	2017.59	3273.75	3502.1
chr4:70797146-70805990	3171.53	0.685677	0.0642165	10.6776	1.29596e-26	5.14639e-24	2445.74	2418.57	3904.93	3916.87
chr7:7858395-7863166	757.857	1.34659	0.126318	10.6603	1.56048e-26	6.15437e-24	459.167	399.28	1115.28	1057.7
chr2:120686986-120700556	4179.8	0.649107	0.060898	10.6589	1.58438e-26	6.20613e-24	3158.8	3346.83	5033.84	5179.75
chr10:26606302-26615526	2544.85	0.851407	0.0799192	10.6533	1.68216e-26	6.54462e-24	1684.06	1938.75	3322.45	3234.14
chr14:70159896-70165937	2252.56	0.805788	0.0758015	10.6302	2.15566e-26	8.33053e-24	1586.83	1688.67	2829.59	2905.15
chr2:125851825-125856684	1267.78	1.01338	0.0955519	10.6056	2.80769e-26	1.0778e-23	862.965	818.905	1675.35	1713.91
chr27:44317036-44319646	616.839	1.40555	0.133256	10.5477	5.20437e-26	1.98459e-23	341.675	334.852	893.195	897.634
chr18:25011087-25015466	607.514	1.6285	0.154442	10.5444	5.38948e-26	2.04166e-23	251.192	338.243	963.325	877.294
chr8:44217089-44224794	2736.83	0.859056	0.0820413	10.471	1.1737e-25	4.41716e-23	1782.65	2099.82	3617.58	3447.27
chr3:49819313-49826278	1429.05	0.950046	0.0908684	10.4552	1.3874e-25	5.18753e-23	942.644	1004.56	1880.87	1888.13
chr20:41134618-41137482	1199.45	1.04003	0.0996129	10.4407	1.61668e-25	6.00583e-23	767.08	801.103	1670.48	1559.14
chr7:63577526-63585509	2441.16	0.745502	0.0715175	10.4241	1.92572e-25	7.108e-23	1820.46	1827.7	3018.55	3097.94
chr3:83844407-83846642	640.476	1.36017	0.13065	10.4108	2.21443e-25	8.12161e-23	360.581	357.741	928.26	915.322
chr14:45950906-45953183	1063.73	1.13736	0.109255	10.4101	2.22944e-25	8.12489e-23	715.761	617.993	1480.54	1440.64
chr14:34551521-34554392	985.198	1.19008	0.114424	10.4005	2.46514e-25	8.92738e-23	652.288	552.718	1388.01	1347.78
chr10:33710273-33713870	1358.11	0.993872	0.0958967	10.364	3.61602e-25	1.29852e-22	960.2	859.596	1815.61	1797.04
chr2:120284686-120291110	1985.27	0.8507	0.0820855	10.3636	3.63073e-25	1.29852e-22	1427.47	1406.38	2439.97	2667.26
chr28:15899223-15901416	264.903	2.35309	0.227965	10.3222	5.59473e-25	1.98858e-22	103.988	72.0568	413.967	469.6
chr1:141350408-141352724	486.174	1.56983	0.152151	10.3176	5.86999e-25	2.07362e-22	236.336	252.623	750.011	705.726
chr15:22329727-22333288	368.539	1.78803	0.17372	10.2926	7.61091e-25	2.67222e-22	164.76	166.155	573.71	569.533
chr26:23741218-23743727	274.088	2.13207	0.207874	10.2566	1.10563e-24	3.85837e-22	103.988	100.032	422.733	469.6
chr11:36640178-36645950	1365.93	0.968901	0.0945518	10.2473	1.21685e-24	4.22093e-22	880.521	963.866	1782.49	1836.83
chr21:5554833-5558467	1293.85	0.97874	0.0955453	10.2437	1.26279e-24	4.35406e-22	841.357	898.591	1687.04	1748.4
chr18:25160102-25163508	1172.67	1.00014	0.097648	10.2423	1.28186e-24	4.39349e-22	784.636	779.062	1564.31	1562.68
chr8:39287996-39292532	751.719	1.23652	0.121034	10.2163	1.67677e-24	5.71303e-22	451.064	445.057	1073.39	1037.36
chr11:3626529-3630346	1045.99	1.05218	0.103393	10.1765	2.52432e-24	8.55017e-22	668.494	691.746	1401.64	1422.06
chrX:79286372-79288622	624.907	1.41774	0.139505	10.1627	2.90904e-24	9.79562e-22	367.334	316.202	869.818	946.275
chr20:35158553-35160361	271.746	2.24741	0.221323	10.1545	3.16551e-24	1.05973e-21	85.081	102.575	498.708	400.619
chr6:15782046-15784933	607.523	1.40117	0.13809	10.1468	3.4243e-24	1.13974e-21	341.675	326.375	926.312	835.728
chr8:57081893-57084167	342.387	2.00371	0.198	10.1198	4.51375e-24	1.49372e-21	110.74	159.373	549.359	550.077
chr5:110868265-110870428	397.805	1.67737	0.166385	10.0812	6.68728e-24	2.20034e-21	189.069	189.891	602.931	609.33
chr1:94916670-94919730	720	1.25363	0.124392	10.0781	6.90323e-24	2.25849e-21	422.704	428.102	984.754	1044.44
chr5:5423975-5426760	645.233	1.43844	0.143496	10.0242	1.19305e-23	3.88118e-21	340.324	354.35	1036.38	849.878
chr23:9571503-9580240	4082.93	0.64749	0.0646689	10.0124	1.34462e-23	4.34969e-21	3025.1	3331.57	4940.33	5034.71
chr18:51837001-51840534	1228.92	0.989653	0.0988797	10.0087	1.39643e-23	4.49205e-21	858.913	790.082	1669.5	1597.17
chr1:79527273-79529468	468.048	1.58034	0.158597	9.96451	2.17955e-23	6.97224e-21	248.491	222.105	738.322	663.277
chr12:14209024-14211759	479.829	1.78174	0.178848	9.96229	2.2287e-23	7.09011e-21	237.687	196.673	846.441	638.514
chr5:60762972-60768664	1832.51	0.92194	0.0925792	9.95839	2.31783e-23	7.33313e-21	1200.59	1328.39	2246.14	2554.94
chr4:102254977-102257402	242.026	2.28895	0.229926	9.95513	2.39519e-23	7.53647e-21	89.1325	76.2955	438.318	364.36
chr23:20549218-20552034	855.353	1.15927	0.116524	9.94879	2.55269e-23	7.98838e-21	555.052	505.246	1208.78	1152.33
chr17:12839191-12842653	1011.9	1.06185	0.106818	9.94066	2.76973e-23	8.62076e-21	656.339	654.446	1418.2	1318.59
chr5:26921955-26930994	1641.55	0.8841	0.0890868	9.92402	3.27296e-23	1.01323e-20	1158.72	1149.52	2024.05	2233.92
chr3:3226500-3229697	750.354	1.19612	0.12058	9.91968	3.41854e-23	1.05264e-20	460.518	451.839	1049.04	1040.02
chr5:94215839-94221038	2206.57	0.755354	0.0762408	9.90747	3.86294e-23	1.18315e-20	1674.61	1610.68	2838.35	2702.63
chr8:49475233-49477072	269.819	2.03225	0.205447	9.89183	4.51715e-23	1.3762e-20	108.039	104.27	435.396	431.572
chr22:34949150-34954187	993.228	1.04804	0.106168	9.87154	5.53093e-23	1.67619e-20	657.69	638.339	1314.95	1361.93
chr9:37048218-37051502	903.275	1.12287	0.114154	9.83642	7.84499e-23	2.36504e-20	540.197	594.257	1275.02	1203.63
chr5:20243765-20246562	468.549	1.50666	0.153192	9.83508	7.95065e-23	2.38441e-20	241.738	245.841	710.075	676.542
chr1:61876883-61878432	137.243	3.15035	0.320376	9.8333	8.09234e-23	2.41433e-20	24.3089	30.5182	247.406	246.739
chr4:111724031-111727343	1199.82	1.07489	0.109339	9.83079	8.29628e-23	2.46241e-20	700.906	839.25	1568.2	1690.91
chr4:7708200-7713621	2983.98	0.74182	0.0756149	9.81049	1.0147e-22	2.99629e-20	2077.06	2382.11	3711.09	3765.64
chr21:19601692-19610169	2657.6	0.721463	0.0736036	9.802	1.10376e-22	3.24263e-20	1940.66	2068.46	3419.85	3201.41
chr26:19091123-19093125	1052.19	1.00715	0.10279	9.79815	1.14667e-22	3.35159e-20	688.751	708.7	1401.64	1409.68
chr1:81459017-81461768	629.254	1.29491	0.132426	9.77836	1.39454e-22	4.03513e-20	351.128	376.391	888.324	901.172
chr9:95422555-95424703	566.3	1.42995	0.146229	9.77883	1.38808e-22	4.03513e-20	336.273	279.75	843.519	805.66
chr6:88657965-88661551	1817.22	0.811311	0.0834558	9.72144	2.44292e-22	7.03328e-20	1285.67	1350.43	2387.37	2245.41
chr3:54094186-54096294	516.608	1.61568	0.166657	9.69467	3.17663e-22	9.10017e-20	212.027	292.466	741.244	820.694
chr11:25527653-25531240	1573.3	0.950143	0.0981828	9.67729	3.76579e-22	1.07345e-19	973.705	1166.47	2113.67	2039.35
chr4:85896843-85900025	1409.11	0.873851	0.0904505	9.66109	4.41123e-22	1.25125e-19	976.406	1012.19	1803.92	1843.91
chr15:25996265-25999102	386.338	1.6441	0.170565	9.63915	5.46384e-22	1.54222e-19	195.821	179.718	602.931	566.88
chr2:36092250-36099592	2245.53	0.717726	0.0746075	9.62003	6.58139e-22	1.8486e-19	1735.38	1663.24	2819.85	2763.65
chr18:6141363-6143154	422.295	1.55109	0.161426	9.60864	7.35155e-22	2.0549e-19	213.378	216.171	646.762	612.868
chr27:35083350-35086476	450.479	1.76192	0.183757	9.58832	8.95286e-22	2.49041e-19	248.491	166.155	669.165	718.107
chrX:102190565-102193369	1006.03	1.02883	0.107471	9.57305	1.03802e-21	2.87356e-19	684.7	640.882	1310.08	1388.46
chr11:68662006-68665330	1048.95	1.0273	0.107436	9.56203	1.15466e-21	3.18116e-19	725.214	658.684	1359.76	1452.13
chr14:61456736-61461680	2831.23	0.687361	0.0719298	9.55601	1.22388e-21	3.35582e-19	2063.55	2269.37	3479.27	3512.71
chr9:64071191-64072810	175.265	2.72995	0.286635	9.52413	1.66433e-21	4.54188e-19	59.4217	34.7568	300.004	306.876
chr3:26484981-26488594	1471.28	0.913827	0.0963712	9.48236	2.4859e-21	6.75192e-19	980.457	1057.12	2032.82	1814.72
chr21:56461850-56466045	2706.75	0.655027	0.0691869	9.46751	2.86595e-21	7.74763e-19	2077.06	2126.95	3256.22	3366.79
chr21:56480071-56485517	1679.46	0.795221	0.0842891	9.43445	3.93044e-21	1.05756e-18	1211.39	1243.62	2086.39	2176.43
chr10:45559602-45563768	689.468	1.18659	0.125866	9.42748	4.2007e-21	1.12502e-18	418.653	423.016	938.974	977.227
chr18:52522382-52525634	736.678	1.22312	0.130122	9.39973	5.47023e-21	1.45825e-18	405.148	475.575	990.599	1075.39
chr14:44546606-44549741	1074.06	1.00802	0.107452	9.38105	6.53159e-21	1.73316e-18	761.678	668.857	1406.51	1459.21
chr15:29760417-29762670	668.011	1.19611	0.127563	9.37664	6.81106e-21	1.79903e-18	413.251	399.28	938	921.512
chr15:43727446-43734400	3127.6	0.700837	0.0747739	9.37275	7.06674e-21	1.85804e-18	2218.86	2538.94	3816.29	3936.33
chr18:62107143-62118369	3954.86	-0.567608	0.0605939	-9.36741	7.43337e-21	1.94555e-18	4832.06	4616.72	3166.6	3204.07
chr6:13238565-13241719	454.319	1.54032	0.165176	9.32531	1.10661e-20	2.88326e-18	255.243	211.932	716.893	633.208
chr27:24934981-24940699	1186.7	0.962883	0.103277	9.3233	1.12778e-20	2.92518e-18	752.224	853.662	1533.14	1607.78
chr26:23735715-23740258	1707.38	0.865349	0.0933244	9.27249	1.81858e-20	4.69576e-18	1126.31	1289.39	2112.69	2301.13
chr1:22092222-22102039	1691.33	0.766756	0.082868	9.25274	2.1882e-20	5.62494e-18	1253.26	1251.25	2112.69	2148.13
chr2:33816467-33819677	1736.3	0.805886	0.0871207	9.25022	2.24041e-20	5.73356e-18	1192.48	1330.08	2237.37	2185.28
chr11:101031531-101034811	1255.05	0.883252	0.0955621	9.24271	2.40342e-20	6.1235e-18	869.717	894.353	1593.53	1662.61
chr10:67523145-67530088	1116.47	0.968646	0.104856	9.23791	2.51363e-20	6.37609e-18	803.543	710.396	1459.11	1492.81
chr1:79770639-79773595	1220.22	0.909049	0.0985287	9.22624	2.80296e-20	7.07884e-18	844.058	851.966	1530.22	1654.65
chr8:39262561-39264577	284.315	1.90372	0.206658	9.21194	3.2029e-20	8.05353e-18	110.74	128.007	412.993	485.518
chr1:65031503-65034813	576.643	1.26272	0.137186	9.20445	3.43427e-20	8.59776e-18	337.623	340.786	797.739	830.422
chr23:38365862-38368069	429.102	1.52126	0.16545	9.19469	3.76067e-20	9.37416e-18	221.481	222.105	588.32	684.501
chr24:57397855-57403357	971.577	0.974427	0.106202	9.17526	4.50472e-20	1.11804e-17	653.638	656.989	1291.58	1284.1
chr11:6836603-6842884	2051.93	0.700098	0.0763616	9.16819	4.81024e-20	1.18569e-17	1555.77	1570.84	2559.78	2521.34
chr15:77617423-77619328	357.605	1.67897	0.183134	9.16801	4.81846e-20	1.18569e-17	186.368	155.982	512.345	575.724
chr2:45644998-45648808	2413.94	0.686604	0.0752133	9.12876	6.92886e-20	1.69775e-17	1815.06	1883.65	2871.47	3085.56
chr12:16589644-16592784	493.52	1.36041	0.149168	9.11996	7.51505e-20	1.83358e-17	264.696	287.38	719.815	702.189
chr1:79585717-79597684	3574.52	0.56817	0.0623288	9.1157	7.81661e-20	1.89911e-17	2902.21	2858.54	4194.22	4343.13
chr11:53946509-53949091	368.565	1.59746	0.175645	9.09482	9.47468e-20	2.28268e-17	191.77	175.48	525.982	581.03
chr8:494069-501580	3501.13	0.585504	0.0643764	9.09502	9.45712e-20	2.28268e-17	2707.74	2888.21	4188.37	4220.21
chr16:79699659-79701717	412.284	1.48209	0.163339	9.07371	1.15029e-19	2.75978e-17	218.78	216.171	585.398	628.786
chr7:49111795-49114858	1027.4	0.973728	0.107328	9.07247	1.16349e-19	2.77986e-17	692.803	693.441	1425.99	1297.37
chr9:93447610-93452070	918.664	1.07813	0.118907	9.06703	1.22303e-19	2.91006e-17	609.072	573.064	1339.3	1153.22
chr5:71098818-71103769	1767.5	0.771856	0.0851991	9.05944	1.31125e-19	3.10711e-17	1347.79	1266.51	2154.58	2301.13
chr3:19748668-19750866	248.45	2.05396	0.227011	9.04787	1.45784e-19	3.44033e-17	114.792	80.5341	402.278	396.197
chr1:56422896-56428384	1833.8	0.725024	0.0801383	9.04716	1.4673e-19	3.44852e-17	1386.96	1378.41	2260.75	2309.09
chr2:22801366-22806248	802.141	1.1486	0.127011	9.04326	1.52072e-19	3.55953e-17	549.65	451.839	1082.16	1124.92
chr27:37975950-37978283	853.838	1.08411	0.120012	9.03328	1.66606e-19	3.88394e-17	590.165	507.789	1185.41	1131.99
chr11:10435508-10437751	273.658	1.89647	0.210218	9.02148	1.85571e-19	4.30861e-17	124.245	108.509	466.565	395.313
chr3:8141715-8144490	788.303	1.2374	0.137261	9.01491	1.97029e-19	4.55628e-17	518.589	423.864	1199.04	1011.72
chr25:33546069-33549815	509.254	1.42614	0.15826	9.01136	2.03516e-19	4.68745e-17	310.613	244.993	769.492	711.917
chr18:51954706-51968611	4798.29	0.506169	0.0563869	8.97671	2.78985e-19	6.37687e-17	3885.37	4041.12	5636.77	5629.89
chr2:129636876-129639482	575.578	1.2836	0.142993	8.97667	2.7908e-19	6.37687e-17	348.427	322.984	865.921	764.979
chr23:31582715-31584627	442.757	1.41984	0.158224	8.97361	2.86959e-19	6.53098e-17	252.542	230.582	627.282	660.623
chr5:26635740-26639091	1257.43	0.911924	0.101689	8.96774	3.02661e-19	6.86123e-17	810.295	930.805	1677.3	1611.32
chr3:48613426-48616451	616.78	1.20828	0.134935	8.95452	3.41224e-19	7.7051e-17	379.488	366.218	898.065	823.347
chr14:16877639-16881605	1025.55	0.974471	0.108974	8.94227	3.81244e-19	8.57516e-17	657.69	723.112	1414.31	1307.1
chr6:158858-162236	1345.38	0.860711	0.0962889	8.93884	3.93287e-19	8.81161e-17	984.509	928.262	1808.79	1659.96
chr25:2310808-2313411	255.533	1.86445	0.208643	8.93604	4.0337e-19	9.0025e-17	108.039	111.9	404.227	397.966
chr1:118616551-118619972	1362.57	0.871058	0.0977567	8.91047	5.08171e-19	1.12977e-16	907.531	1015.58	1703.6	1823.57
chr28:18197442-18200499	1394.02	0.842861	0.0950547	8.86712	7.50637e-19	1.6624e-16	953.448	1039.31	1852.62	1730.71
chr20:12423585-12425898	154.426	2.88421	0.325302	8.86625	7.56517e-19	1.669e-16	52.6692	23.7364	260.069	281.229
chr8:11735415-11738249	1020.61	0.944181	0.106654	8.85274	8.53941e-19	1.87675e-16	664.442	729.046	1359.76	1329.21
chr28:30445457-30449315	800.597	1.06857	0.120885	8.83954	9.6111e-19	2.10425e-16	486.177	545.089	1114.3	1056.82
chr27:15907645-15920714	2850.35	0.602254	0.0681781	8.83354	1.01414e-18	2.21195e-16	2216.16	2309.21	3391.61	3484.41
chr16:65898473-65905894	858.648	0.994837	0.112687	8.82832	1.06257e-18	2.30882e-16	569.908	577.302	1157.16	1130.22
chr3:54714902-54717043	397.124	1.56958	0.17783	8.8263	1.08193e-18	2.34206e-16	222.831	179.718	634.1	551.846
chr21:44492552-44498261	3268.08	0.565263	0.0641106	8.81699	1.17575e-18	2.53561e-16	2632.11	2639.82	3835.77	3964.62
chr22:49759574-49764617	1520.99	0.828718	0.0941987	8.79756	1.39823e-18	3.00416e-16	1039.88	1147.82	2033.8	1862.48
chr4:61312868-61316798	938.831	1.02101	0.116074	8.79626	1.41456e-18	3.02794e-16	568.557	667.162	1287.68	1231.93
chr4:101488558-101491200	458.928	1.38403	0.157382	8.79406	1.44245e-18	3.0762e-16	264.696	244.993	628.256	697.767
chr6:45673504-45675735	476.328	1.32659	0.151075	8.78101	1.62013e-18	3.44239e-16	282.253	261.948	682.802	678.311
chr8:52968927-52972291	939.259	1.01149	0.115326	8.77067	1.77609e-18	3.75989e-16	582.062	660.38	1310.08	1204.51
chr10:19094204-19098342	952.048	0.946127	0.107991	8.76115	1.9327e-18	4.07645e-16	668.494	634.1	1260.41	1245.19
chr8:85301928-85305861	1942.22	0.746611	0.0852723	8.7556	2.03015e-18	4.26636e-16	1420.72	1479.28	2300.68	2568.21
chr12:19111303-19114168	944.944	0.959269	0.109667	8.74711	2.18885e-18	4.58314e-16	614.474	667.162	1237.03	1261.11
chr9:83843788-83846876	587.977	1.26801	0.145015	8.74404	2.24911e-18	4.69224e-16	307.912	378.934	814.297	850.763
chr15:40283956-40288234	3254.96	0.565909	0.0647961	8.73369	2.46488e-18	5.12384e-16	2653.72	2597.44	3808.5	3960.2
chr6:54645540-54647027	165.01	2.40435	0.275417	8.72987	2.54955e-18	5.28078e-16	47.2672	56.7977	256.172	299.801
chr19:53872437-53877418	1372.07	0.811767	0.0930039	8.7283	2.5852e-18	5.33544e-16	981.808	1008.8	1805.87	1691.8
chr3:986907-989643	402.052	1.59602	0.183443	8.70036	3.30841e-18	6.80362e-16	221.481	180.566	536.696	669.467
chr15:65819701-65822309	408.985	1.50132	0.172571	8.69973	3.32674e-18	6.81698e-16	234.986	194.13	639.944	566.88
chr1:79325306-79328047	989.046	1.06805	0.122989	8.68408	3.81805e-18	7.79601e-16	636.082	640.882	1484.44	1194.78
chr2:57574249-57580574	1912.46	0.704157	0.0811955	8.67237	4.23213e-18	8.61095e-16	1457.18	1452.16	2452.63	2287.86
chr21:20039851-20042656	473.645	1.32168	0.152437	8.67033	4.30857e-18	8.73563e-16	279.552	262.796	653.581	698.651
chr29:18038563-18042203	554.295	1.21814	0.140766	8.65368	4.9863e-18	1.00585e-15	324.118	341.634	751.959	799.469
chr3:54898945-54900486	243.529	1.92356	0.222288	8.65346	4.99595e-18	1.00585e-15	87.782	113.595	401.304	371.435
chr9:95976505-95979211	773.486	1.07565	0.124479	8.64121	5.56204e-18	1.11592e-15	459.167	533.221	1069.5	1032.06
chr6:113307608-113313790	1740.79	0.743628	0.0862097	8.6258	6.36462e-18	1.2725e-15	1235.7	1363.99	2151.65	2211.81
chr13:67028590-67031280	951.549	0.942571	0.109312	8.62279	6.53433e-18	1.30191e-15	652.288	650.207	1297.42	1206.28
chr24:57174501-57180439	1058.22	0.886746	0.103006	8.60867	7.391e-18	1.46752e-15	721.163	762.955	1365.6	1383.15
chr9:83879770-83881383	189.988	2.14199	0.248904	8.6057	7.58539e-18	1.50094e-15	72.9266	67.8182	328.251	290.957
chr7:95064979-95071960	826.923	1.11109	0.129502	8.57972	9.51037e-18	1.8754e-15	460.518	581.541	1161.06	1104.58
chr1:81521055-81523024	311.387	1.61649	0.188813	8.56135	1.11557e-17	2.19235e-15	163.41	144.114	467.539	470.484
chr15:40304017-40306428	585.801	1.18234	0.138303	8.54891	1.24254e-17	2.43356e-15	337.623	377.239	799.687	828.653
chr19:13877342-13880307	786.434	1.04997	0.123354	8.51189	1.71128e-17	3.34024e-15	548.3	478.966	1089.95	1028.52
chr22:51394880-51397832	1465.35	0.824242	0.097127	8.48624	2.13436e-17	4.15197e-15	1122.26	996.928	1954.9	1787.31
chr12:27730922-27737506	1327.44	0.875172	0.103217	8.47893	2.27283e-17	4.40646e-15	850.81	1017.27	1735.74	1705.95
chr4:47916792-47918639	362.934	1.50569	0.177607	8.47768	2.29729e-17	4.43894e-15	191.77	186.5	574.684	498.784
chr28:35901674-35906998	500.241	1.3652	0.161079	8.47534	2.34401e-17	4.51198e-15	307.912	254.318	661.373	777.36
chr4:106947778-106950320	244.998	2.14934	0.25361	8.475	2.35076e-17	4.51198e-15	106.689	75.4478	472.409	325.448
chr22:58402632-58404587	512.432	1.38046	0.162913	8.47361	2.37894e-17	4.5509e-15	248.491	317.05	799.687	684.501
chr14:70407617-70410119	695.162	1.17207	0.138425	8.46715	2.51463e-17	4.79454e-15	379.488	471.337	1010.08	919.743
chr16:43833667-43835692	403.603	1.4219	0.168087	8.45932	2.68949e-17	5.111e-15	213.378	224.648	626.308	550.077
chr26:9417550-9421110	721.705	1.13334	0.134187	8.44599	3.01489e-17	5.71054e-15	413.251	487.443	1054.89	931.24
chr3:20139343-20144194	2947.52	0.585325	0.0693792	8.43661	3.26688e-17	6.16754e-15	2379.57	2336.34	3661.42	3412.78
chr27:7103795-7106475	510.143	1.23496	0.146484	8.43066	3.43713e-17	6.46775e-15	295.758	311.964	693.516	739.332
chr8:39580353-39583451	438.945	1.35891	0.161296	8.42497	3.60857e-17	6.76824e-15	264.696	229.734	607.801	653.548
chr2:44825643-44827587	448.913	1.32433	0.157347	8.41658	3.87627e-17	7.24673e-15	271.449	242.45	656.503	625.249
chr20:62708099-62714320	1484.57	0.751438	0.0893477	8.41027	4.09055e-17	7.62258e-15	1108.75	1104.59	1805.87	1919.08
chr5:112703588-112708388	1685.52	0.697725	0.0833664	8.36937	5.79255e-17	1.07594e-14	1304.58	1268.2	2060.09	2109.22
chr7:27403825-27405106	110.963	2.93898	0.351584	8.35926	6.31115e-17	1.1685e-14	21.6079	28.8227	181.171	212.248
chr3:99685014-99686408	215.148	1.90541	0.227995	8.35727	6.4188e-17	1.18462e-14	94.5345	87.3159	340.914	337.829
chr21:57739471-57743014	577.196	1.20296	0.144076	8.34949	6.85571e-17	1.25719e-14	324.118	373	762.673	848.994
chr5:103928596-103930685	1052.65	0.928534	0.111205	8.34971	6.84293e-17	1.25719e-14	769.781	683.268	1451.32	1306.21
chr2:104623443-104641377	1653.73	0.708342	0.0848514	8.34802	6.94166e-17	1.26891e-14	1228.95	1280.92	2015.29	2089.76
chr11:71973880-71976549	839.235	0.944347	0.113454	8.32358	8.53437e-17	1.55512e-14	571.258	576.455	1105.54	1103.69
chr4:38799415-38803055	699.743	1.07847	0.129646	8.31852	8.90656e-17	1.61782e-14	415.952	480.662	971.118	931.24
chr8:39774602-39776798	1009.8	0.884431	0.106331	8.3177	8.96839e-17	1.62393e-14	730.616	690.05	1344.18	1274.38
chr22:6920381-6924066	1734.41	0.69081	0.0832755	8.29548	1.08149e-16	1.95214e-14	1359.95	1296.18	2106.85	2174.66
chr1:52576362-52578687	187.39	2.05633	0.247967	8.29272	1.10685e-16	1.99168e-14	74.2771	71.2091	317.537	286.535
chr14:14649085-14652571	4179.13	-0.506693	0.0611232	-8.28971	1.13524e-16	2.0364e-14	5065.7	4748.97	3480.24	3421.62
chr1:77025121-77027735	849.337	0.935743	0.113001	8.28087	1.22281e-16	2.1799e-14	576.66	589.171	1107.48	1124.03
chr8:62130949-62140412	4011.17	0.514473	0.0621267	8.28103	1.22119e-16	2.1799e-14	3192.56	3409.56	4660.78	4781.78
chr8:56823172-56826271	741.056	1.02842	0.124213	8.2795	1.23689e-16	2.19819e-14	459.167	513.723	976.962	1014.37
chr2:27166191-27167572	222.313	1.91875	0.23241	8.25589	1.5077e-16	2.67123e-14	105.338	82.2296	369.161	332.523
chr6:111225681-111228838	397.921	1.58171	0.191807	8.24638	1.63266e-16	2.88375e-14	240.388	161.916	623.386	565.996
chr1:142153079-142155984	904.198	0.918697	0.111418	8.24547	1.64513e-16	2.89689e-14	614.474	635.796	1219.5	1147.03
chr10:13635324-13641795	2867.57	0.591283	0.0717857	8.23679	1.76895e-16	3.09599e-14	2395.77	2185.44	3494.86	3394.21
chr27:11432732-11435742	1000.61	0.871887	0.105848	8.23714	1.76374e-16	3.09599e-14	695.504	718.025	1262.36	1326.55
chr3:10699955-10702103	371.461	1.53575	0.187013	8.21202	2.17494e-16	3.79501e-14	164.76	213.627	598.061	509.396
chr16:70509411-70513166	1437.75	0.775022	0.0945844	8.19397	2.52743e-16	4.39674e-14	1003.42	1113.91	1871.13	1762.55
chr15:74250219-74251649	117.829	2.91109	0.355472	8.18937	2.62604e-16	4.55451e-14	32.4118	23.7364	244.484	170.683
chr12:31439391-31440950	217.611	1.86206	0.227484	8.18543	2.71325e-16	4.69164e-14	98.5859	89.8591	328.251	353.747
chr26:12880178-12881625	141.344	2.50622	0.306328	8.18148	2.8039e-16	4.83387e-14	51.3187	34.7568	259.095	220.208
chr17:30096340-30099610	670.462	1.07895	0.131914	8.17916	2.85839e-16	4.9131e-14	448.363	414.539	958.455	860.491
chr22:44227169-44229119	259.578	1.70642	0.209861	8.13118	4.25118e-16	7.28533e-14	130.998	113.595	417.863	375.857
chr2:94032415-94038336	1346.66	0.83375	0.102564	8.12909	4.32542e-16	7.39056e-14	880.521	1050.33	1706.52	1749.28
chr1:78894558-78901064	2535.44	0.604135	0.0743227	8.12853	4.34519e-16	7.40237e-14	1929.85	2090.5	2995.17	3126.24
chr16:52320297-52321729	167.591	2.23727	0.27552	8.12018	4.65501e-16	7.88497e-14	45.9167	69.5137	273.705	281.229
chr24:37458663-37460391	291.348	1.64866	0.203034	8.12016	4.65586e-16	7.88497e-14	122.895	156.83	465.591	420.075
chr20:28547215-28549054	332.243	1.49809	0.184686	8.11153	4.99879e-16	8.44092e-14	168.812	178.023	524.033	458.103
chr18:58641753-58644664	1090.18	0.839355	0.103618	8.10047	5.4747e-16	9.21751e-14	771.131	791.778	1341.25	1456.56
chr4:15826908-15832235	2728.62	0.621638	0.0767883	8.09548	5.70394e-16	9.57547e-14	2005.48	2287.17	3301.02	3320.8
chr12:55906666-55909928	571.179	1.11116	0.137481	8.08227	6.35742e-16	1.06415e-13	352.478	369.609	796.765	765.863
chr23:27186042-27189226	1237.75	0.778276	0.0963102	8.08093	6.42747e-16	1.07275e-13	885.923	935.891	1539.96	1589.21
chr9:85302885-85306184	453.006	1.23952	0.153474	8.07643	6.66906e-16	1.10986e-13	271.449	267.882	625.334	647.358
chr11:101023112-101026057	701.417	1.01166	0.125321	8.07252	6.88641e-16	1.14273e-13	468.621	462.012	904.883	970.152
chr19:33622395-33627219	1112.89	0.82867	0.102728	8.06665	7.22515e-16	1.19549e-13	767.08	834.164	1392.88	1457.44
chr4:93558192-93559347	95.2378	3.36551	0.417364	8.06372	7.40061e-16	1.22102e-13	8.10295	23.7364	180.197	168.914
chr10:1140569-1144613	956.964	0.890951	0.110695	8.04872	8.36677e-16	1.37648e-13	676.597	664.618	1304.24	1182.4
chr24:44318543-44323995	928.677	0.871667	0.10858	8.02791	9.91452e-16	1.62646e-13	668.494	645.121	1210.73	1190.36
chr25:16430342-16435771	1560.78	0.692053	0.0863149	8.01777	1.07683e-15	1.76151e-13	1181.68	1204.62	1893.53	1963.3
chr7:32689531-32690706	145.037	2.35209	0.294115	7.99718	1.27305e-15	2.07659e-13	48.6177	46.625	214.289	270.617
chr4:107651275-107655376	970.912	0.87537	0.109508	7.99367	1.30984e-15	2.13056e-13	671.195	697.68	1312.03	1202.74
chr3:45662013-45664791	927.565	0.866209	0.108398	7.99103	1.33814e-15	2.17047e-13	648.236	665.466	1190.28	1206.28
chr25:22192612-22194453	148.7	2.24852	0.281764	7.98013	1.46179e-15	2.36437e-13	56.7207	47.4727	247.406	243.201
chr4:56662596-56665987	759.085	0.969553	0.121505	7.97954	1.46875e-15	2.36896e-13	529.393	498.464	971.118	1037.36
chr9:87871327-87873496	531.109	1.12919	0.141562	7.97665	1.50362e-15	2.41843e-13	338.974	328.071	729.556	727.835
chr1:46557866-46563463	1888.97	0.628518	0.0787999	7.97612	1.51e-15	2.42193e-13	1476.09	1491.15	2301.66	2286.98
chr8:39623260-39627370	1598.33	0.787437	0.0987717	7.97229	1.55755e-15	2.49126e-13	1057.44	1281.76	2009.44	2044.66
chr4:8805272-8807169	352.62	1.50137	0.188375	7.97014	1.58496e-15	2.52808e-13	210.677	160.221	494.812	544.771
chr14:8142905-8145516	721.375	0.973932	0.122225	7.96833	1.60835e-15	2.5583e-13	476.724	495.921	950.663	962.193
chr21:8023926-8026857	905.059	0.895769	0.112479	7.96384	1.66779e-15	2.64553e-13	664.442	603.582	1160.08	1192.13
chr5:19871972-19874224	271.599	1.63856	0.205828	7.9608	1.7093e-15	2.70394e-13	117.493	144.961	400.33	423.613
chr8:112953520-112957969	604.271	1.05837	0.133097	7.95186	1.83727e-15	2.89841e-13	391.643	392.498	801.635	831.307
chr16:18862607-18865651	876.173	0.915298	0.115163	7.94786	1.89757e-15	2.98535e-13	641.484	575.607	1121.12	1166.48
chr6:17343330-17346619	340.289	1.40333	0.177122	7.92298	2.31894e-15	3.63833e-13	185.017	188.196	500.657	487.287
chr12:68089674-68092016	601.627	1.15735	0.146114	7.92088	2.35832e-15	3.69007e-13	326.819	414.539	815.271	849.878
chr4:66529679-66532995	1038.93	0.85119	0.107544	7.91483	2.47587e-15	3.8635e-13	780.585	704.462	1295.47	1375.19
chr4:28748867-28749968	133.375	2.54323	0.321501	7.9105	2.56365e-15	3.98967e-13	27.0098	49.1682	222.081	235.242
chr3:49768658-49774166	2226.54	0.639446	0.0808718	7.90691	2.63857e-15	4.09519e-13	1632.75	1843.81	2685.43	2744.2
chr4:28594625-28597093	588.387	1.22851	0.155477	7.90157	2.75421e-15	4.26318e-13	307.912	392.498	896.117	757.02
chr15:35445711-35448787	640.815	1.1173	0.141471	7.89774	2.84009e-15	4.38433e-13	361.932	443.362	920.468	837.497
chr21:68162112-68166748	1427.39	0.739467	0.0936426	7.89669	2.8641e-15	4.40956e-13	1010.17	1124.93	1765.93	1808.53
chr22:47711683-47722245	2538.57	0.551404	0.0698934	7.88921	3.04094e-15	4.66934e-13	2070.3	2048.96	2998.09	3036.92
chr16:32203185-32205926	312.29	1.58335	0.200834	7.88388	3.17365e-15	4.86015e-13	130.998	178.871	490.916	448.375
chr15:32325216-32328260	1328.42	0.759359	0.0963866	7.87826	3.31975e-15	5.07041e-13	1037.18	939.282	1705.54	1631.66
chr2:52315937-52318548	234.137	1.82872	0.232303	7.87216	3.48582e-15	5.30998e-13	121.544	86.4682	343.836	384.7
chr16:51160932-51162670	174.724	2.0047	0.254982	7.8621	3.77745e-15	5.73903e-13	72.9266	66.9705	269.809	289.189
chr18:54556244-54558802	1232.82	0.749377	0.0953815	7.85663	3.94611e-15	5.9795e-13	904.83	933.348	1561.39	1531.73
chr27:37185718-37188412	177.922	2.1103	0.268962	7.8461	4.29162e-15	6.48598e-13	79.679	55.95	262.991	313.067
chr17:65240504-65248055	3467.69	0.514908	0.0656611	7.84191	4.43732e-15	6.68862e-13	2853.59	2857.69	3932.2	4227.28
chr14:45383897-45385818	249.65	1.94245	0.247763	7.83996	4.50691e-15	6.77578e-13	95.885	109.357	481.176	312.182
chr1:57470920-57475119	1165.65	0.792345	0.101138	7.83433	4.71339e-15	7.06776e-13	827.852	877.398	1422.1	1535.26
chr11:25237251-25239827	1482.21	0.690561	0.0882192	7.82778	4.96561e-15	7.42662e-13	1154.67	1114.76	1852.62	1806.77
chr1:58650003-58652806	869.524	0.951066	0.121709	7.81429	5.52753e-15	8.24561e-13	598.268	587.475	1239.95	1052.4
chr7:42643474-42645377	220.206	1.75401	0.224547	7.8113	5.66013e-15	8.42159e-13	105.338	96.6409	351.628	327.216
chr22:50310683-50314034	297.983	1.48813	0.190723	7.80258	6.0656e-15	9.00164e-13	162.059	151.743	450.98	427.15
chr24:53713093-53716327	814.847	0.922022	0.118309	7.79333	6.5266e-15	9.66087e-13	556.403	568.825	1116.25	1017.91
chr14:81719867-81725797	8329.83	-0.36661	0.047071	-7.78845	6.78358e-15	1.00155e-12	9338.65	9425.88	7212.77	7342.03
chrX:82595910-82598648	312.829	1.4666	0.18834	7.78694	6.86503e-15	1.01099e-12	179.615	154.286	464.617	452.797
chr10:67121125-67128825	815.593	0.905904	0.116444	7.77975	7.26672e-15	1.06741e-12	549.65	584.084	1085.08	1043.56
chr24:43117889-43119790	350.611	1.35549	0.174268	7.77819	7.35693e-15	1.07791e-12	201.223	193.282	506.501	501.437
chr23:31601324-31603049	548.169	1.08723	0.139837	7.77496	7.54721e-15	1.10299e-12	361.932	340.786	747.089	742.87
chr29:29465170-29469603	1553.65	0.711574	0.0915707	7.77076	7.80138e-15	1.13724e-12	1104.7	1247.01	1940.29	1922.62
chr28:18049450-18060311	2303.73	0.576402	0.0741856	7.76973	7.86546e-15	1.14369e-12	1848.82	1850.59	2686.4	2829.1
chr5:4963435-4968262	2827.73	0.524785	0.0675519	7.76861	7.9351e-15	1.15091e-12	2343.1	2296.49	3291.28	3380.06
chr27:38783509-38785725	199.108	1.92569	0.248216	7.75814	8.61852e-15	1.24689e-12	83.7305	82.2296	354.551	275.923
chr16:27243145-27248456	1873.44	0.649496	0.0837289	7.75714	8.68678e-15	1.25362e-12	1430.17	1486.07	2190.62	2386.91
chr3:36623248-36627044	912.626	0.974481	0.125812	7.74554	9.51789e-15	1.37012e-12	538.846	687.507	1192.22	1231.93
chr6:36792507-36796004	1378.8	0.761345	0.0983137	7.74404	9.6308e-15	1.38292e-12	952.097	1090.18	1690.93	1782
chr3:54184941-54188521	814.671	0.917186	0.118484	7.74103	9.8615e-15	1.41252e-12	555.052	572.216	1115.28	1016.14
chr24:39682515-39689069	1486.54	0.702034	0.0907035	7.73988	9.95078e-15	1.42178e-12	1153.32	1111.37	1910.09	1771.39
chr14:8048143-8049704	809.742	1.03626	0.133912	7.73836	1.00711e-14	1.4354e-12	552.351	510.332	1208.78	967.499
chr10:78972628-78975948	728.443	1.03765	0.134139	7.73565	1.02877e-14	1.46265e-12	456.466	496.768	892.221	1068.32
chr26:8819107-8823139	1288.2	0.762992	0.0986498	7.73435	1.03932e-14	1.47401e-12	1011.52	902.83	1583.79	1654.65
chr2:72358824-72361861	416.424	1.25262	0.162144	7.72534	1.11554e-14	1.57823e-12	260.645	233.125	597.086	574.84
chr18:35223132-35224999	249.559	1.68529	0.218586	7.70996	1.25854e-14	1.77618e-12	132.348	105.966	406.175	353.747
chr5:98331826-98337149	1240.92	0.776921	0.100804	7.70726	1.28547e-14	1.80975e-12	969.653	862.987	1608.14	1522.88
chr13:54055294-54058370	233.165	1.66508	0.216096	7.70529	1.30545e-14	1.83339e-12	110.74	112.748	344.81	364.36
chr11:43895956-43898018	497.242	1.12502	0.146057	7.70259	1.33336e-14	1.86803e-12	313.314	311.964	691.568	672.12
chr6:13210481-13213090	147.643	2.18432	0.283673	7.70011	1.35948e-14	1.9e-12	54.0197	52.5591	262.017	221.977
chr4:78936591-78940160	1171.45	0.763912	0.0994682	7.67997	1.59129e-14	2.2186e-12	858.913	877.398	1423.07	1526.42
chr6:25558110-25562128	740.369	0.96562	0.125746	7.67916	1.60139e-14	2.22729e-12	514.538	489.139	1035.4	922.397
chr14:9184050-9188150	489.879	1.2248	0.159787	7.66519	1.78561e-14	2.47752e-12	287.655	299.248	615.593	757.02
chr16:63663860-63668239	2545.91	0.557185	0.0729222	7.64082	2.15849e-14	2.98769e-12	1985.22	2131.19	3078.94	2988.28
chr23:28241468-28243881	262.075	1.7203	0.225688	7.62249	2.48835e-14	3.43601e-12	148.554	98.3364	414.941	386.469
chr25:29107268-29110021	949.825	0.816521	0.107133	7.62159	2.50578e-14	3.4518e-12	676.597	698.528	1211.71	1212.47
chr10:50966111-50970955	1420.5	0.691427	0.0907973	7.61506	2.63565e-14	3.6178e-12	1068.24	1103.74	1709.44	1800.57
chr5:1347530-1350193	1529.63	0.66437	0.087246	7.61491	2.63885e-14	3.6178e-12	1195.19	1172.41	1914.96	1835.95
chr19:22017167-22024995	2153.72	0.618652	0.0812626	7.613	2.67802e-14	3.66278e-12	1600.33	1792.1	2654.26	2568.21
chr19:40019133-40020508	220.077	1.79771	0.236333	7.60669	2.81203e-14	3.83695e-12	108.039	89.8591	303.9	378.51
chr19:23278473-23280707	564.14	1.13486	0.14926	7.60321	2.88865e-14	3.93218e-12	338.974	366.218	703.257	848.11
chr13:77748852-77752307	403.222	1.25752	0.165451	7.60057	2.94827e-14	4.00388e-12	255.243	222.105	566.891	568.649
chr13:69706413-69711178	835.214	0.887698	0.116811	7.59947	2.97348e-14	4.02861e-12	613.124	561.196	1054.89	1111.65
chr19:34418744-34420890	207.846	1.77339	0.233588	7.59195	3.1513e-14	4.25951e-12	99.9364	89.0114	301.952	340.482
chr5:46179592-46184206	911.312	0.861757	0.113547	7.58942	3.21341e-14	4.33328e-12	681.999	614.603	1140.6	1208.05
chr2:85746519-85750953	1764.94	0.6834	0.090162	7.57969	3.4638e-14	4.66003e-12	1253.26	1450.46	2157.5	2198.54
chr8:16625483-16629912	602.289	1.03127	0.136251	7.56896	3.76233e-14	5.04986e-12	410.55	382.325	774.362	841.919
chr11:19525701-19528260	223.674	1.72145	0.227547	7.56527	3.87054e-14	5.18301e-12	99.9364	107.661	374.031	313.067
chr11:13556412-13557943	433.026	1.18596	0.156788	7.56407	3.90658e-14	5.21914e-12	272.799	256.861	601.957	600.486
chr14:35037071-35039247	363.786	1.35829	0.179893	7.5505	4.33578e-14	5.7692e-12	182.316	223.8	549.359	499.668
chr17:15860195-15861369	148.651	2.25734	0.298968	7.55043	4.33835e-14	5.7692e-12	39.1643	61.8841	269.809	223.745
chr24:37377348-37379994	894.131	0.900485	0.119527	7.53372	4.93152e-14	6.5429e-12	596.918	648.512	1247.75	1083.35
chr10:80274328-80279584	769.794	0.891049	0.118301	7.53206	4.99473e-14	6.61154e-12	544.248	534.916	984.754	1015.26
chr16:37016501-37018591	288.909	1.46739	0.194875	7.5299	5.07774e-14	6.706e-12	155.307	151.743	447.084	401.503
chr5:5189798-5193888	1429.77	0.72367	0.096187	7.52357	5.33006e-14	7.02311e-12	1027.72	1126.63	1698.73	1866.02
chr6:62533720-62536450	1215.79	0.787834	0.104899	7.51042	5.89365e-14	7.74799e-12	840.006	940.13	1624.7	1458.32
chr5:100462163-100464067	221.775	1.6941	0.225739	7.50467	6.15831e-14	8.07749e-12	101.287	107.661	363.317	314.835
chr8:59931910-59934842	585.757	1.10026	0.14684	7.49291	6.73626e-14	8.81547e-12	343.025	400.127	740.27	859.606
chr11:87615989-87618828	493.609	1.1391	0.15211	7.48864	6.95892e-14	9.0862e-12	334.922	283.989	670.139	685.386
chr19:53832365-53834305	794.073	0.899995	0.120236	7.48527	7.14017e-14	9.30176e-12	561.805	546.784	1086.05	981.649
chr14:10658047-10660036	418.024	1.20422	0.161142	7.47305	7.83565e-14	1.01847e-11	255.243	250.927	608.775	557.152
chr6:19864684-19868980	2978.9	0.512521	0.0686241	7.46852	8.10991e-14	1.05175e-11	2372.82	2533.86	3452	3556.93
chr7:7761104-7762954	285.719	1.47162	0.197063	7.46776	8.15724e-14	1.05551e-11	147.204	155.134	446.11	394.428
chr5:51242056-51244087	312.798	1.47691	0.19825	7.44975	9.35172e-14	1.20736e-11	191.77	141.571	459.747	458.103
chr23:15884185-15885953	405.222	1.23036	0.165225	7.44657	9.57999e-14	1.23406e-11	260.645	225.496	567.865	566.88
chr23:17002540-17004847	146.37	2.08351	0.280159	7.43687	1.031e-13	1.32514e-11	60.7722	51.7114	238.64	234.358
chr2:103860363-103863218	557.07	1.15333	0.15511	7.43559	1.04102e-13	1.33503e-11	313.314	375.543	698.387	841.035
chr11:100389673-100394959	887.631	0.834337	0.112462	7.41881	1.18173e-13	1.51028e-11	650.937	625.623	1174.69	1099.27
chr13:11841696-11844060	926.64	0.836793	0.112795	7.41868	1.18292e-13	1.51028e-11	684.7	646.816	1244.82	1130.22
chr19:38980542-38984021	644.379	0.97646	0.131675	7.41571	1.20975e-13	1.54112e-11	440.26	428.95	813.323	894.981
chr10:35047142-35051009	1700.73	0.648556	0.0875579	7.40716	1.2903e-13	1.6401e-11	1262.71	1383.49	2019.18	2137.52
chr11:62445866-62450890	1313	0.687197	0.0928043	7.4048	1.31349e-13	1.66591e-11	1014.22	998.623	1591.58	1647.58
chrX:2547931-2550592	408.822	1.25745	0.169907	7.4008	1.35365e-13	1.71306e-11	217.429	262.796	548.384	606.677
chr1:59047420-59048767	242.608	1.57959	0.213505	7.39836	1.37878e-13	1.74104e-11	113.441	128.855	377.927	350.21
chr2:79558429-79561405	371.639	1.2986	0.175578	7.39617	1.40171e-13	1.76612e-11	234.986	196.673	507.475	547.424
chr17:12596162-12601413	2589.8	0.523418	0.0708613	7.38651	1.50732e-13	1.89505e-11	2182.4	2071	3027.32	3078.49
chr18:43883532-43885964	223.388	1.63629	0.221542	7.38594	1.51382e-13	1.89907e-11	101.287	115.291	340.914	336.06
chr13:44516531-44525548	2926.92	0.49948	0.0676504	7.38324	1.54478e-13	1.93369e-11	2360.66	2486.39	3454.92	3405.7
chr7:54020336-54022475	233.121	1.69203	0.229183	7.38291	1.54868e-13	1.93437e-11	128.297	94.0978	374.031	336.06
chr7:43333886-43335511	354.163	1.31624	0.178295	7.38237	1.55491e-13	1.93796e-11	214.728	192.434	475.331	534.159
chr20:67280163-67282063	524.935	1.11953	0.151845	7.37284	1.67031e-13	2.07729e-11	307.912	351.807	771.44	668.583
chr1:118962026-118964355	461.851	1.13146	0.153547	7.36885	1.72101e-13	2.13572e-11	274.15	303.486	622.411	647.358
chr18:5404370-5408274	1520.76	0.691637	0.0938846	7.36689	1.7466e-13	2.15817e-11	1092.55	1229.21	1941.26	1820.03
chr4:66698578-66703232	664.089	0.935826	0.12703	7.36695	1.74572e-13	2.15817e-11	460.518	451.839	855.207	888.791
chr3:54163546-54165975	281.376	1.46527	0.198917	7.36624	1.75512e-13	2.16406e-11	156.657	143.266	437.344	388.238
chr15:51638817-51641978	329.667	1.39547	0.189535	7.36261	1.80353e-13	2.21899e-11	205.275	160.221	487.994	465.178
chr10:83448592-83450669	700.427	1.02522	0.13926	7.36187	1.81345e-13	2.22645e-11	513.187	413.691	883.454	991.377
chr7:100545666-100551537	1034.79	0.785839	0.106829	7.35606	1.89417e-13	2.3206e-11	744.121	773.975	1371.45	1249.61
chr18:20183378-20185971	720.184	0.941984	0.12827	7.34374	2.07714e-13	2.53936e-11	452.415	530.677	948.715	948.928
chr24:56994755-56997671	1449.1	0.730353	0.0995606	7.33577	2.20449e-13	2.68934e-11	1018.27	1158	1714.31	1905.81
chr10:36725032-36726992	256.279	1.52221	0.20767	7.32996	2.3022e-13	2.80259e-11	136.4	128.855	357.473	402.388
chr1:96343400-96346062	494.646	1.07732	0.147621	7.29789	2.92307e-13	3.55092e-11	305.211	329.766	684.75	658.855
chr16:36805900-36808469	549.954	1.09374	0.150017	7.29075	3.08237e-13	3.73654e-11	332.221	367.914	814.297	685.386
chr13:67017511-67026259	3219.28	0.486895	0.0668054	7.28826	3.13973e-13	3.79809e-11	2742.85	2622.87	3655.57	3855.85
chr6:101737270-101743663	6728.73	-0.369684	0.0507635	-7.28248	3.27746e-13	3.95639e-11	7447.97	7721.1	5875.41	5870.44
chr8:1571972-1573909	493.494	1.07331	0.147413	7.28096	3.31449e-13	3.99272e-11	328.17	308.573	682.802	654.433
chr4:69778373-69780349	270.092	1.51044	0.207514	7.27874	3.3696e-13	4.05063e-11	158.008	124.616	384.746	413
chr4:24734245-24739160	1396.91	0.65324	0.089911	7.26541	3.71913e-13	4.46148e-11	1080.39	1091.03	1727.95	1688.26
chr1:38698304-38700705	416.337	1.19161	0.164036	7.26433	3.74901e-13	4.48798e-11	264.696	243.298	611.697	545.655
chrX:133551352-133555691	720.889	0.899338	0.123828	7.26279	3.79174e-13	4.52971e-11	526.692	481.509	946.767	928.587
chr2:97232771-97235080	511.389	1.11697	0.153904	7.2576	3.94032e-13	4.69747e-11	341.675	305.182	754.881	643.82
chr5:40692610-40695282	1261.79	0.728333	0.100416	7.25314	4.07205e-13	4.84448e-11	896.727	999.471	1632.49	1518.46
chr14:30892451-30897168	613.236	0.995277	0.137381	7.24467	4.33483e-13	5.14647e-11	386.241	431.493	778.258	856.953
chr14:44203577-44208684	2441.28	0.558631	0.0771182	7.24383	4.36186e-13	5.1679e-11	1900.14	2045.57	2798.42	3021
chr14:63884356-63885472	121.778	2.26896	0.313314	7.2418	4.42767e-13	5.22019e-11	47.2672	37.3	193.834	208.711
chr19:38738181-38741034	582.905	0.991057	0.136851	7.24186	4.42558e-13	5.22019e-11	394.344	386.564	744.166	806.544
chr22:47675582-47678266	314.558	1.42614	0.196936	7.24163	4.43318e-13	5.22019e-11	197.172	146.657	460.721	453.681
chr5:104064190-104067754	1640.58	0.668861	0.0924435	7.23535	4.6432e-13	5.45633e-11	1230.3	1302.11	1890.61	2139.29
chr7:18654774-18657789	810.164	0.870384	0.120399	7.22914	4.86052e-13	5.70007e-11	571.258	574.759	984.754	1109.88
chr14:9013946-9018155	1247.59	0.706925	0.0978856	7.22195	5.12486e-13	5.99786e-11	930.489	963.866	1612.04	1483.97
chr1:143130339-143135428	2451.38	0.528661	0.0732107	7.22109	5.15724e-13	6.02351e-11	2071.66	1946.38	2854.91	2932.57
chr8:57066989-57069131	381.293	1.24619	0.172625	7.21905	5.23527e-13	6.10227e-11	212.027	239.059	504.553	569.533
chr15:15560608-15563058	580.199	1.01026	0.14004	7.21403	5.43179e-13	6.31854e-11	414.601	357.741	777.284	771.17
chr7:58454286-58458512	838.552	0.845293	0.117216	7.21139	5.53823e-13	6.42937e-11	634.731	567.13	1092.87	1059.47
chr13:68798759-68803877	1461.6	0.654493	0.0907793	7.20972	5.60686e-13	6.49595e-11	1093.9	1174.95	1751.32	1826.22
chr7:90636917-90638846	592.479	0.969115	0.134756	7.19165	6.40122e-13	7.40138e-11	410.55	391.65	765.595	802.122
chr13:67927721-67931815	630.206	0.939777	0.131009	7.17337	7.31711e-13	8.44342e-11	429.457	434.037	855.207	802.122
chr23:33383920-33390211	938.934	0.804055	0.112193	7.16674	7.6803e-13	8.84478e-11	691.452	676.487	1258.46	1129.34
chr11:53966558-53969937	1021.38	0.748654	0.104688	7.15128	8.59711e-13	9.88084e-11	788.688	737.523	1276.97	1282.33
chr17:15833425-15834711	88.1031	2.69812	0.377338	7.1504	8.65229e-13	9.92445e-11	24.3089	22.8886	154.872	150.343
chr10:17680779-17684461	642.339	0.949681	0.132831	7.14953	8.70779e-13	9.96825e-11	407.849	466.25	844.493	850.763
chr3:25706188-25708638	359.97	1.29086	0.180702	7.14357	9.09356e-13	1.03892e-10	185.017	230.582	491.89	532.39
chr23:50354620-50356393	173.967	1.93006	0.270304	7.14034	9.30978e-13	1.06152e-10	89.1325	57.6455	267.861	281.229
chr19:12767148-12772984	1882.37	0.650946	0.0912555	7.13322	9.80483e-13	1.11575e-10	1359.95	1564.06	2407.83	2197.66
chr5:29344820-29347395	871.219	0.837283	0.117462	7.12811	1.01758e-12	1.15569e-10	596.918	651.903	1060.73	1175.33
chr17:53616654-53618770	285.698	1.38383	0.194347	7.12041	1.07609e-12	1.21973e-10	148.554	167.002	416.889	410.347
chr7:95983510-95986978	1067.51	0.746442	0.104868	7.11794	1.0955e-12	1.23929e-10	761.678	830.773	1303.27	1374.31
chr9:29700631-29705133	1005.53	0.76064	0.106908	7.11493	1.11974e-12	1.26423e-10	718.462	772.28	1300.34	1231.04
chr11:25384324-25387920	509.951	1.02606	0.144312	7.11003	1.1602e-12	1.30734e-10	329.52	341.634	697.413	671.236
chrX:119455815-119460474	1340.04	0.68139	0.0959037	7.10494	1.20375e-12	1.35378e-10	1002.07	1054.57	1724.05	1579.48
chr29:29403747-29407675	974.64	0.750245	0.105611	7.10383	1.2135e-12	1.36208e-10	727.915	725.655	1236.06	1208.93
chr3:85868964-85870840	413.99	1.22804	0.172951	7.10051	1.24299e-12	1.39247e-10	217.429	275.511	548.384	614.636
chr12:14672259-14675898	635.543	0.917815	0.129281	7.0994	1.25304e-12	1.40099e-10	438.91	440.818	843.519	818.925
chr22:27901512-27906153	964.896	0.851054	0.119948	7.09516	1.29201e-12	1.43898e-10	721.163	657.837	1132.81	1347.78
chr26:23959919-23963093	1581.67	0.6587	0.0928361	7.0953	1.29069e-12	1.43898e-10	1151.97	1297.02	2004.57	1873.09
chr14:36143635-36145132	422.208	1.13389	0.159974	7.08796	1.36101e-12	1.5129e-10	256.594	271.273	602.931	558.037
chr19:10710638-10719567	4670.63	0.428728	0.0605361	7.08219	1.41889e-12	1.5742e-10	3816.49	4140.3	5400.08	5325.67
chr11:69369693-69372945	418.767	1.16054	0.163925	7.07972	1.44441e-12	1.59943e-10	244.439	272.121	547.41	611.099
chr4:75039793-75042409	709.977	0.890576	0.125831	7.07757	1.46708e-12	1.62142e-10	506.435	489.139	965.274	879.062
chrX:104987594-104989243	241.253	1.5576	0.22017	7.07451	1.49977e-12	1.65437e-10	112.091	131.398	392.538	328.985
chr22:32460891-32464325	1410.71	0.673695	0.0952522	7.07275	1.51894e-12	1.67231e-10	1065.54	1107.98	1642.23	1827.11
chr18:25615923-25625080	5742.54	0.38823	0.054934	7.0672	1.58094e-12	1.73726e-10	4875.28	5069.41	6652.69	6372.76
chr14:2989451-2994664	1274.65	0.705498	0.0999404	7.05918	1.67487e-12	1.83697e-10	977.756	961.323	1485.41	1674.11
chr13:32183659-32191093	3937.44	0.470746	0.0667073	7.05689	1.70275e-12	1.864e-10	3218.22	3380.74	4363.7	4787.09
chr3:30464288-30465968	150.63	2.12648	0.301533	7.05225	1.76048e-12	1.92353e-10	72.9266	41.5387	258.121	229.936
chr7:70760103-70762117	243.226	1.47534	0.209224	7.05149	1.77011e-12	1.93039e-10	125.596	131.398	360.395	355.516
chr23:7252201-7254149	404.323	1.15443	0.163801	7.04776	1.81822e-12	1.97911e-10	251.192	250.08	585.398	530.621
chr28:45506300-45508221	187.957	1.74261	0.247274	7.04726	1.82479e-12	1.98252e-10	79.679	92.4023	312.667	267.079
chr3:118386116-118388621	552.913	1.12687	0.160002	7.04287	1.88318e-12	2.0421e-10	401.096	297.552	718.841	794.163
chr2:36000485-36002536	878.987	0.839618	0.11926	7.04025	1.91899e-12	2.07702e-10	653.638	608.668	1050.02	1203.63
chr20:3782718-3795952	2639.61	0.519902	0.0739092	7.03434	2.00208e-12	2.16289e-10	2060.85	2271.91	3138.36	3087.33
chr27:14431333-14434380	585.487	0.958722	0.136304	7.0337	2.0112e-12	2.16867e-10	406.498	389.955	745.141	800.354
chr22:12636385-12640314	1336.86	0.643083	0.0914706	7.03049	2.05815e-12	2.21515e-10	1035.83	1051.18	1620.8	1639.62
chr23:40547990-40551773	474.49	1.05177	0.149665	7.02748	2.1029e-12	2.25908e-10	299.809	317.05	630.204	650.895
chr29:31536232-31538248	758.16	0.897219	0.127707	7.0256	2.13154e-12	2.28559e-10	479.425	576.455	991.573	985.187
chr18:11143155-11144736	420.977	1.13473	0.161576	7.02288	2.17336e-12	2.3261e-10	280.902	247.536	591.242	564.227
chr5:92467604-92469302	309.252	1.3112	0.186715	7.02245	2.18018e-12	2.32907e-10	171.513	183.109	458.773	423.613
chr4:51850835-51854359	1234.36	0.729075	0.104012	7.00956	2.39073e-12	2.54927e-10	885.923	969.8	1447.42	1634.31
chr2:9776287-9779527	2214.99	0.519675	0.0741958	7.0041	2.48575e-12	2.64569e-10	1796.15	1842.96	2636.73	2584.13
chr1:43159131-43196938	7838.2	0.377515	0.0539091	7.00281	2.50872e-12	2.66522e-10	6621.46	7010.71	8584.21	9136.41
chr6:100818648-100825708	2698.36	0.507115	0.072434	7.00106	2.54031e-12	2.6938e-10	2313.39	2148.99	3091.6	3239.44
chr21:22138145-22140750	211.032	1.60932	0.23013	6.99309	2.68895e-12	2.84619e-10	110.74	98.3364	337.018	298.032
chr13:12697315-12710807	4616.08	0.405975	0.0580573	6.99267	2.69709e-12	2.84956e-10	3929.93	4010.6	5137.09	5386.69
chr14:30325049-30326179	119.622	2.20008	0.314749	6.98995	2.74981e-12	2.89995e-10	39.1643	45.7773	211.367	182.18
chr14:19267865-19272813	4408.35	0.402527	0.0576849	6.97802	2.9936e-12	3.15127e-10	3732.76	3858.86	5050.4	4991.38
chr11:71981486-71992350	4307.41	0.422429	0.0605945	6.97141	3.13772e-12	3.29695e-10	3555.85	3801.21	4980.27	4892.33
chr23:37850364-37852197	309.342	1.38105	0.19829	6.9648	3.2887e-12	3.4493e-10	148.554	192.434	476.306	420.075
chr15:56493978-56496754	2416.13	0.537628	0.0772198	6.96231	3.34741e-12	3.50449e-10	1987.92	1955.71	2717.57	3003.32
chr19:14239849-14242304	678.843	0.969477	0.139315	6.95889	3.42967e-12	3.58203e-10	436.209	479.814	985.728	813.619
chr8:31422537-31425394	465.547	1.05646	0.151818	6.95871	3.43391e-12	3.58203e-10	301.16	303.486	604.879	652.664
chr2:89726663-89729296	269.654	1.39901	0.201213	6.95287	3.57939e-12	3.72703e-10	156.657	140.723	407.149	374.088
chr17:4706523-4709721	483.692	1.03664	0.149151	6.95025	3.64628e-12	3.78983e-10	310.613	322.984	627.282	673.889
chr13:62114851-62116715	263.342	1.40573	0.20233	6.94772	3.71237e-12	3.84495e-10	135.049	152.591	382.798	382.932
chr4:58768895-58772255	882.936	0.783423	0.11276	6.94771	3.71267e-12	3.84495e-10	623.927	672.248	1093.85	1141.72
chr1:10428513-10432483	1538.72	0.59789	0.0862606	6.93121	4.17265e-12	4.31357e-10	1210.04	1237.68	1872.1	1835.07
chr11:66441002-66445280	1050.05	0.717986	0.103627	6.92856	4.25152e-12	4.37937e-10	810.295	779.062	1270.15	1340.7
chr11:78626305-78627924	142.44	1.96053	0.28296	6.92864	4.249e-12	4.37937e-10	64.8236	52.5591	225.977	226.398
chr24:32496076-32499054	635.974	0.897988	0.129677	6.92478	4.36663e-12	4.48991e-10	432.158	455.23	836.7	819.81
chr11:103486132-103488877	950.296	0.839471	0.121435	6.91291	4.74807e-12	4.87342e-10	749.523	617.146	1275.99	1158.52
chr9:48338627-48340794	515.076	0.986599	0.14287	6.90559	4.99963e-12	5.12249e-10	349.778	341.634	680.854	688.039
chr4:66930481-66932486	531.997	0.970247	0.140591	6.9012	5.15643e-12	5.27376e-10	360.581	358.589	711.049	697.767
chr5:112423580-112426984	1240.22	0.675505	0.0979173	6.89874	5.24676e-12	5.35662e-10	925.087	983.364	1474.7	1577.71
chr5:69941132-69942637	159.13	1.8508	0.268336	6.89732	5.29921e-12	5.4006e-10	78.3286	61.0364	251.302	245.854
chr20:3721515-3726667	590.768	0.955273	0.138612	6.89171	5.51273e-12	5.60828e-10	401.096	402.671	827.934	731.373
chr2:129938228-129940920	533.054	0.986172	0.143141	6.88951	5.59859e-12	5.68558e-10	374.086	342.482	727.608	688.039
chr17:12602107-12603307	116.082	2.4743	0.359429	6.88398	5.8205e-12	5.90053e-10	20.2574	48.3205	206.496	189.255
chr22:58040295-58042620	230.836	1.56924	0.228254	6.87498	6.19971e-12	6.27391e-10	126.946	106.814	381.824	307.76
chr20:58779293-58783284	1476.01	0.67774	0.0986527	6.86996	6.42204e-12	6.4875e-10	1199.24	1075.77	1705.54	1923.5
chr13:12165015-12168447	999.702	0.727278	0.105924	6.86602	6.60165e-12	6.65726e-10	731.967	772.28	1275.02	1219.54
chr23:15297276-15299968	835.202	0.789701	0.115062	6.86324	6.73137e-12	6.77621e-10	621.226	603.582	1091.9	1024.1
chr26:44102470-44105308	298.362	1.29473	0.188683	6.86193	6.79374e-12	6.82706e-10	178.265	167.85	433.448	413.885
chr7:12778520-12781862	882.137	0.813771	0.118663	6.85782	6.99182e-12	7.01387e-10	594.217	682.421	1079.24	1172.67
chr10:44591261-44595142	701.107	0.872315	0.127268	6.85414	7.17416e-12	7.18427e-10	479.425	510.332	863.973	950.696
chr15:31555183-31557230	553.853	0.963314	0.140812	6.84115	7.85588e-12	7.85329e-10	384.89	367.066	699.361	764.095
chr3:35266826-35270135	2413.86	-0.49432	0.0723174	-6.83542	8.17665e-12	8.15979e-10	2852.24	2794.96	2049.38	1958.88
chr3:18769198-18772664	610.643	0.920982	0.134835	6.83042	8.46649e-12	8.43441e-10	424.055	420.473	758.777	839.266
chr7:26435524-26435946	143.637	1.90883	0.279521	6.82891	8.55614e-12	8.509e-10	56.7207	63.5796	236.692	217.555
chr1:94936369-94939429	1647.26	0.622472	0.0911598	6.82836	8.58927e-12	8.51254e-10	1208.69	1380.95	2029.9	1969.49
chrX:125909601-125914109	1425.72	0.642068	0.0940286	6.82843	8.58486e-12	8.51254e-10	1118.21	1108.83	1828.27	1647.58
chr3:109510423-109513862	266.913	1.37034	0.200692	6.82808	8.60573e-12	8.5142e-10	158.008	140.723	388.642	380.279
chr2:3953029-3955144	547.132	1.01906	0.149368	6.82249	8.94775e-12	8.8374e-10	402.447	323.832	724.686	737.563
chr6:15269480-15277826	1959.46	0.556158	0.0815226	6.82213	8.96993e-12	8.84414e-10	1555.77	1615.77	2242.24	2424.05
chr20:25988137-25990164	322.185	1.28949	0.189129	6.81802	9.2303e-12	9.0853e-10	166.111	205.998	475.331	441.3
chr5:78115428-78116991	124.454	2.04827	0.300753	6.81048	9.72738e-12	9.55823e-10	48.6177	48.3205	204.548	196.33
chr2:79529235-79532065	1085.67	-0.764591	0.112283	-6.80952	9.79236e-12	9.60569e-10	1353.19	1380.95	728.582	879.947
chr18:2378087-2382906	744.203	0.840699	0.123467	6.80911	9.82069e-12	9.61709e-10	549.65	517.962	997.417	911.784
chr11:15580060-15583380	626.045	0.888579	0.130572	6.80528	1.00853e-11	9.85941e-10	445.662	433.189	795.791	829.538
chr10:15059509-15062208	297.912	1.31299	0.192962	6.80439	1.0148e-11	9.88719e-10	180.966	161.916	449.032	399.735
chr5:83898602-83902650	1027.68	0.708741	0.104158	6.80446	1.0143e-11	9.88719e-10	769.781	790.082	1242.87	1307.98
chr5:56993944-56994729	190.308	1.75506	0.258232	6.79644	1.07232e-11	1.043e-09	67.5246	104.27	283.446	305.992
chr23:28945671-28951064	495.597	0.997008	0.146789	6.7921	1.10514e-11	1.07311e-09	320.067	340.786	646.762	674.773
chr10:43425762-43427544	363.033	1.20198	0.177029	6.78974	1.12336e-11	1.08713e-09	197.172	240.755	497.734	516.471
chr2:100191230-100197604	1116.06	0.686411	0.101092	6.78996	1.12162e-11	1.08713e-09	849.46	861.291	1330.54	1422.95
chr1:83170438-83175581	988.148	0.767906	0.113203	6.78342	1.17363e-11	1.13387e-09	791.389	674.791	1263.33	1223.08
chr22:44276825-44278835	261.378	1.36676	0.201602	6.7795	1.20596e-11	1.16315e-09	144.503	147.505	365.265	388.238
chr25:9547244-9548958	208.385	1.54087	0.227353	6.77745	1.22312e-11	1.17774e-09	112.091	101.727	314.615	305.107
chr13:78356748-78358095	123.607	2.04808	0.303049	6.75824	1.39674e-11	1.34266e-09	45.9167	50.0159	207.47	191.024
chr26:34325132-34327726	354.229	1.27214	0.188323	6.75511	1.4273e-11	1.36976e-09	197.172	217.018	440.266	562.458
chr29:45194201-45196272	251.209	1.4942	0.22169	6.74003	1.58351e-11	1.51714e-09	114.792	146.657	409.097	334.291
chr4:101296805-101300502	966.755	0.791815	0.11752	6.73773	1.60884e-11	1.53884e-09	637.432	773.975	1245.8	1209.82
chr13:12479336-12481608	463.728	1.17653	0.174828	6.72962	1.70104e-11	1.62434e-09	236.336	328.918	684.75	604.908
chr17:16790319-16793035	602.707	0.921667	0.136963	6.72933	1.70448e-11	1.62493e-09	392.993	438.275	759.751	819.81
chr11:61098334-61100947	843.72	0.777366	0.115539	6.72817	1.71806e-11	1.63517e-09	590.165	651.055	1072.42	1061.24
chr8:110324237-110325788	147.723	1.98185	0.294846	6.72166	1.79672e-11	1.70721e-09	44.5662	72.9046	224.029	249.392
chr22:28263356-28265296	245.028	1.48467	0.220929	6.72012	1.81579e-11	1.72248e-09	112.091	144.114	389.616	334.291
chr2:61420463-61423550	1244.04	0.718918	0.107031	6.71689	1.8565e-11	1.75821e-09	868.367	1007.95	1634.44	1465.4
chr22:53386909-53391371	823.893	0.804014	0.119798	6.71141	1.92749e-11	1.82244e-09	623.927	578.15	991.573	1101.92
chr10:81379807-81383344	1046.72	0.720382	0.107359	6.71005	1.94553e-11	1.83648e-09	817.048	766.346	1238	1365.47
chr17:71781762-71786213	1992.76	0.562402	0.0838605	6.70641	1.99477e-11	1.87988e-09	1581.43	1636.11	2248.08	2505.42
chr3:36594820-36596336	161.236	1.90274	0.283793	6.70469	2.0183e-11	1.89895e-09	49.9682	83.925	258.121	252.929
chr8:88788434-88791284	732.562	0.822732	0.122893	6.69469	2.16123e-11	2.03011e-09	549.65	510.332	910.727	959.54
chr10:69851402-69855763	1474.65	0.692842	0.103544	6.69125	2.21267e-11	2.07504e-09	1058.79	1192.75	1680.22	1966.84
chr1:110494205-110500886	3455.29	-0.42218	0.0631079	-6.68982	2.23452e-11	2.09213e-09	4031.22	3885.14	2986.41	2918.42
chr12:55351979-55355064	1061.51	0.767972	0.114865	6.68589	2.29523e-11	2.14548e-09	825.151	748.543	1227.29	1445.06
chr20:2680472-2684346	998.913	0.728483	0.108999	6.68342	2.33436e-11	2.17852e-09	744.121	759.564	1179.56	1312.4
chr3:2985279-2996736	7304.21	0.33972	0.0508713	6.67802	2.42199e-11	2.25664e-09	6312.2	6580.06	8040.7	8283.88
chrX:17302108-17303623	173.288	1.69278	0.253606	6.67486	2.47462e-11	2.30196e-09	82.38	81.3818	284.42	244.97
chr14:43704933-43708093	2120.68	0.564841	0.0847576	6.6642	2.66115e-11	2.47148e-09	1609.79	1807.36	2429.26	2636.3
chr15:52471490-52474410	806.323	0.769846	0.115604	6.65932	2.75103e-11	2.55084e-09	595.567	596.8	996.443	1036.48
chr22:44179063-44185181	1888.42	0.536012	0.0805458	6.65475	2.83785e-11	2.62711e-09	1496.35	1584.4	2207.17	2265.75
chr22:44388885-44391846	409.298	1.12409	0.16895	6.65338	2.86442e-11	2.64745e-09	279.552	237.364	525.982	594.296
chr18:7754214-7759522	855.341	0.747256	0.112471	6.64398	3.05328e-11	2.81748e-09	650.937	627.318	1059.76	1083.35
chr26:16859027-16861829	562.931	0.920896	0.138703	6.63934	3.15099e-11	2.903e-09	392.993	385.716	707.153	765.863
chr10:97095227-97098798	935.886	0.766597	0.115641	6.62908	3.37781e-11	3.10699e-09	636.082	746	1202.94	1158.52
chr1:19549671-19551832	470.068	0.998361	0.150614	6.62861	3.38873e-11	3.11206e-09	302.51	323.832	613.645	640.283
chr13:81610187-81613220	1052.27	0.697588	0.105262	6.62713	3.42273e-11	3.13829e-09	788.688	815.514	1358.79	1246.08
chr29:8561983-8563327	240.552	1.4267	0.215626	6.61653	3.67731e-11	3.36634e-09	116.142	143.266	342.862	359.938
chr5:109359757-109361116	155.51	1.88712	0.285422	6.61169	3.79951e-11	3.47269e-09	76.9781	56.7977	212.341	275.923
chr5:111885639-111890493	1945.47	0.554039	0.0838027	6.61123	3.81136e-11	3.478e-09	1516.6	1633.57	2221.79	2409.9
chr17:6247900-6249698	331.613	1.32588	0.200754	6.60452	3.98802e-11	3.63345e-09	156.657	218.714	513.319	437.763
chr19:47093712-47097596	786.649	0.792839	0.120074	6.60293	4.03114e-11	3.66693e-09	575.31	576.455	947.741	1047.09
chr4:79527417-79529282	335.757	1.25963	0.19093	6.59735	4.18561e-11	3.80145e-09	167.461	225.496	483.124	466.947
chr1:7950623-7956047	1250.37	1.36239	0.206586	6.59476	4.25939e-11	3.86236e-09	596.918	801.103	1821.45	1782
chr10:37308962-37311435	281.305	1.35974	0.206273	6.59194	4.34124e-11	3.93039e-09	166.111	150.048	450.006	359.054
chr14:24835572-24838609	881.702	0.83571	0.126838	6.58881	4.43371e-11	4.00781e-09	559.104	702.766	1172.74	1092.2
chr13:78003336-78007147	567.979	0.931228	0.141356	6.5878	4.46381e-11	4.0287e-09	417.302	366.218	768.517	719.876
chr5:24390178-24393345	907.225	0.805875	0.122376	6.58523	4.54196e-11	4.09281e-09	588.815	727.35	1134.76	1177.98
chr2:120738911-120741989	399.887	1.11347	0.169257	6.57858	4.74962e-11	4.27325e-09	259.295	246.689	591.242	502.321
chr18:1744364-1747133	407.173	1.228	0.186702	6.57732	4.78996e-11	4.29612e-09	291.706	199.216	581.502	556.268
chr2:24647231-24651722	949.698	0.728591	0.110772	6.57739	4.78768e-11	4.29612e-09	752.224	679.878	1211.71	1154.99
chr5:54720614-54722593	575.1	0.888231	0.135072	6.57599	4.833e-11	4.32797e-09	402.447	404.366	748.063	745.523
chr4:79530419-79531918	195.191	1.60286	0.244139	6.56534	5.19153e-11	4.64183e-09	82.38	109.357	307.797	281.229
chr22:298297-301536	762.852	-0.77183	0.117577	-6.56443	5.22307e-11	4.66279e-09	953.448	970.648	563.969	563.343
chr12:50803975-50809387	499.162	1.02242	0.155802	6.5623	5.29832e-11	4.72264e-09	325.469	333.157	604.879	733.142
chr15:30956918-30959401	492.148	0.979572	0.149379	6.55763	5.46679e-11	4.86528e-09	322.768	339.091	620.463	686.27
chr13:81192893-81194348	189.762	1.64466	0.25084	6.55662	5.50405e-11	4.89088e-09	83.7305	99.1841	321.433	254.698
chr28:14002878-14011939	2155.34	0.526268	0.08036	6.54888	5.79703e-11	5.14328e-09	1669.21	1859.07	2516.92	2576.17
chr13:52190878-52200980	3317.8	0.477336	0.072921	6.54594	5.91216e-11	5.23736e-09	2594.3	2946.7	3793.89	3936.33
chr8:39230783-39233873	722.746	0.934395	0.142792	6.54375	5.99946e-11	5.30653e-09	421.354	567.13	943.845	958.656
chr10:20742509-20745603	819.96	0.760629	0.116262	6.54239	6.05437e-11	5.34688e-09	622.577	595.953	997.417	1063.9
chr1:81455571-81458342	291.61	1.2591	0.192909	6.52689	6.71508e-11	5.9213e-09	171.513	172.089	436.37	386.469
chr8:44205267-44208428	905.64	0.772771	0.118425	6.52539	6.78271e-11	5.97179e-09	640.133	695.137	1223.39	1063.9
chr2:129265846-129270251	803.504	0.788535	0.120852	6.52481	6.80891e-11	5.9857e-09	599.619	579.846	956.507	1078.05
chr19:22770329-22772652	195.737	1.57191	0.24098	6.523	6.89128e-11	6.04888e-09	89.1325	106.814	314.615	272.386
chr28:45362605-45365525	792.617	0.797251	0.122356	6.51585	7.228e-11	6.33478e-09	549.65	606.125	1057.81	956.887
chr28:18528833-18530342	143.497	1.95278	0.299923	6.51094	7.46832e-11	6.53546e-09	72.9266	46.625	248.38	206.058
chr19:23371458-23374033	1004.3	0.68777	0.10572	6.50555	7.74075e-11	6.76358e-09	748.173	789.234	1210.73	1269.07
chr4:79179407-79181404	216.774	1.54082	0.237098	6.49863	8.10531e-11	7.07139e-09	94.5345	125.464	352.602	294.495
chr14:14808574-14810639	714.482	0.812212	0.124991	6.49818	8.12998e-11	7.08218e-09	496.981	538.307	940.923	881.716
chr1:98589492-98592708	514.905	0.930329	0.143187	6.49731	8.17691e-11	7.11231e-09	364.633	345.025	676.958	673.005
chr13:42074740-42076781	492.879	0.986551	0.151938	6.49313	8.40722e-11	7.3016e-09	301.16	357.741	655.529	657.086
chr18:16107015-16114535	3634.18	0.434033	0.066852	6.49245	8.445e-11	7.32337e-09	2942.72	3234.08	4236.1	4123.81
chr20:23105463-23114755	3408.13	0.410532	0.0632495	6.49068	8.54525e-11	7.39916e-09	2873.85	2976.37	3927.33	3854.96
chr12:36501517-36502655	92.0553	2.37044	0.365764	6.4808	9.12383e-11	7.88828e-09	35.1128	25.4318	143.184	164.493
chr6:101993431-101996571	263.623	1.43936	0.222206	6.47758	9.32037e-11	8.04612e-09	171.513	115.291	394.486	373.204
chr22:35900322-35903140	648.958	0.829751	0.128207	6.47198	9.67273e-11	8.3378e-09	453.765	479.814	831.83	830.422
chr2:130768438-130773787	1649.77	0.56099	0.0867678	6.46542	1.01019e-10	8.69474e-09	1324.83	1341.11	1886.72	2046.43
chr14:61234630-61238008	1505.16	0.573678	0.088766	6.46281	1.02778e-10	8.83297e-09	1253.26	1169.02	1785.42	1812.96
chr28:30844008-30846064	280.584	1.35328	0.209443	6.46133	1.03788e-10	8.90645e-09	130.998	182.261	392.538	416.538
chr15:52570063-52572828	630.952	0.839406	0.130147	6.44969	1.12077e-10	9.6034e-09	463.219	442.514	793.843	824.232
chr20:13770439-13772962	1006.49	0.685206	0.106294	6.44633	1.1459e-10	9.80414e-09	802.192	743.457	1264.3	1216.01
chr10:54261844-54263739	316.775	1.17931	0.183104	6.4407	1.18926e-10	1.016e-08	183.667	203.455	442.214	437.763
chr10:43742573-43746013	1043.02	0.717931	0.111505	6.43854	1.20631e-10	1.02753e-08	823.8	756.173	1210.73	1381.38
chr3:793838-795780	465.398	1.00153	0.15555	6.43864	1.20549e-10	1.02753e-08	284.954	333.157	605.853	637.63
chr4:79768939-79770829	216.997	1.44055	0.223782	6.4373	1.21619e-10	1.03441e-08	124.245	110.205	330.2	303.338
chr16:63708002-63710312	286.634	1.26829	0.197124	6.43397	1.24312e-10	1.05575e-08	155.307	179.718	428.578	382.932
chr1:57074734-57079327	2616.5	0.481296	0.0748154	6.43312	1.25015e-10	1.06016e-08	2071.66	2291.41	3005.89	3097.06
chr16:4329318-4333369	3306.94	-0.43478	0.0675988	-6.43177	1.26126e-10	1.06801e-08	3855.66	3747.8	2926.99	2697.32
chr9:18834954-18839384	2425.47	0.463707	0.0721101	6.43055	1.27145e-10	1.07506e-08	2067.6	2011.66	2860.76	2761.88
chr25:34511125-34518733	3676.74	0.398195	0.0619385	6.42887	1.28553e-10	1.08537e-08	3120.99	3221.36	4248.76	4115.85
chr23:6930949-6934005	1040.17	0.663201	0.10321	6.42576	1.31212e-10	1.10619e-08	827.852	784.148	1267.23	1281.45
chr3:54942041-54947082	742.584	0.770636	0.119978	6.42316	1.33476e-10	1.12364e-08	542.898	554.414	921.442	951.581
chr9:59661321-59664225	487.171	0.956121	0.148887	6.42179	1.34684e-10	1.13215e-08	344.376	319.593	621.437	663.277
chr9:89986818-89990640	779.263	0.810154	0.126199	6.41966	1.36575e-10	1.14637e-08	538.846	591.714	924.364	1062.13
chr16:24311284-24314822	997.285	0.681646	0.10622	6.4173	1.38708e-10	1.16116e-08	734.668	795.168	1228.26	1231.04
chr23:44209491-44211978	691.659	0.829865	0.129317	6.41727	1.3874e-10	1.16116e-08	461.868	531.525	903.909	869.334
chr3:10548893-10551449	497.565	0.949274	0.147965	6.41551	1.40351e-10	1.17294e-08	356.53	323.832	674.036	635.861
chr22:28662092-28665574	373.989	1.09968	0.171456	6.41379	1.41949e-10	1.18458e-08	232.285	243.298	478.254	542.118
chr1:70362021-70365277	262.707	1.38692	0.216271	6.41288	1.42797e-10	1.18992e-08	170.162	122.921	363.317	394.428
chr21:69748954-69755914	2582.99	-0.444593	0.0694038	-6.4059	1.49489e-10	1.24389e-08	2976.49	2978.91	2216.91	2159.63
chr18:33989097-33990036	55.86	3.22256	0.503094	6.40549	1.49891e-10	1.24544e-08	9.45345	11.8682	101.3	100.818
chr18:12535085-12538630	1597.89	-0.541878	0.0846183	-6.40379	1.51569e-10	1.25756e-08	1866.38	1921.8	1294.5	1308.87
chr20:24166808-24172646	983.17	0.699958	0.109364	6.40023	1.55138e-10	1.28513e-08	780.585	719.721	1262.36	1170.02
chr29:26172834-26175183	801.369	0.764544	0.119459	6.40004	1.55337e-10	1.28513e-08	627.979	562.043	1027.61	987.84
chr1:151153554-151156338	209.691	1.52025	0.237555	6.39957	1.55818e-10	1.28725e-08	118.843	99.1841	277.601	343.135
chr5:30150493-30158858	3935.6	0.379949	0.0593824	6.39835	1.57063e-10	1.29568e-08	3419.45	3421.43	4403.63	4497.9
chr4:46184124-46196366	2353.73	0.472718	0.0738927	6.39735	1.58093e-10	1.30231e-08	1909.6	2030.31	2717.57	2757.46
chr15:76320191-76323890	516.115	0.9104	0.142325	6.39662	1.58852e-10	1.30669e-08	359.231	357.741	678.906	668.583
chr19:42154222-42155799	109.824	2.06596	0.323258	6.39106	1.64739e-10	1.35319e-08	47.2672	38.1477	174.353	179.527
chr14:2813642-2817749	1077.68	0.645489	0.101165	6.38057	1.76428e-10	1.44508e-08	823.8	856.205	1303.27	1327.44
chr6:45176875-45179777	461.109	1.13991	0.178648	6.38075	1.76226e-10	1.44508e-08	230.934	340.786	644.814	627.902
chr11:67405166-67406800	229.46	1.37017	0.214865	6.37692	1.80687e-10	1.47786e-08	133.699	122.921	333.122	328.101
chr27:29186643-29192814	1756.4	0.520902	0.0817084	6.37513	1.82806e-10	1.49307e-08	1430.17	1454.7	2037.69	2103.03
chr12:52781179-52784273	623.94	0.83383	0.130831	6.37335	1.84942e-10	1.50838e-08	463.219	434.884	802.609	795.047
chr18:28491234-28494025	1903.64	-0.523813	0.0822632	-6.36752	1.92103e-10	1.56457e-08	2154.04	2334.64	1533.14	1592.75
chr6:97782595-97784163	111.709	2.15026	0.337812	6.36526	1.94958e-10	1.58558e-08	29.7108	50.8637	174.353	191.908
chr16:3471177-3473380	167.87	1.81352	0.284984	6.36358	1.97111e-10	1.60082e-08	54.0197	92.4023	285.394	239.664
chr19:6309455-6314955	1689.29	0.526436	0.0827477	6.36194	1.9922e-10	1.61568e-08	1374.8	1393.66	1971.46	2017.24
chr21:44500313-44501801	190.943	1.50036	0.235843	6.36171	1.9952e-10	1.61583e-08	101.287	98.3364	287.342	276.807
chr14:30756786-30759121	514.78	0.964029	0.151617	6.3583	2.03999e-10	1.64979e-08	352.478	345.873	621.437	739.332
chrX:63740219-63746544	628.575	0.907492	0.142813	6.35441	2.09233e-10	1.68974e-08	428.106	445.905	737.348	902.94
chr10:17565330-17569802	1601	-0.542597	0.0855165	-6.34493	2.2252e-10	1.79453e-08	1908.25	1889.58	1267.23	1338.93
chr11:96186028-96190875	779.597	0.763684	0.120395	6.34313	2.25149e-10	1.81319e-08	552.351	601.887	950.663	1013.49
chr3:107059336-107062727	941.535	0.712476	0.11233	6.34273	2.25729e-10	1.81532e-08	679.298	746	1123.07	1217.78
chr19:17886792-17890112	346.739	1.15266	0.181753	6.34193	2.26902e-10	1.82221e-08	226.883	204.302	516.241	439.531
chr20:18336069-18339880	408.732	1.04157	0.164341	6.33784	2.33008e-10	1.86864e-08	282.253	253.471	575.658	523.546
chr21:24432832-24434166	163.704	1.62358	0.256244	6.33608	2.3569e-10	1.88752e-08	76.9781	83.0773	244.484	250.276
chr10:97057358-97066054	3099.46	0.444457	0.0702001	6.33129	2.43121e-10	1.94433e-08	2597	2652.54	3736.42	3411.89
chr2:105531814-105533621	133.695	1.84006	0.290657	6.33068	2.44081e-10	1.9493e-08	55.3702	61.0364	192.86	225.514
chr16:27347335-27350883	951.826	0.734418	0.116046	6.32868	2.47273e-10	1.97205e-08	672.545	754.478	1119.17	1261.11
chr10:48966117-48969166	645.67	0.875929	0.138519	6.32352	2.55679e-10	2.03627e-08	495.631	417.93	877.61	791.51
chr26:10676580-10680685	937.395	0.697068	0.110261	6.32199	2.58211e-10	2.0536e-08	729.266	701.918	1205.86	1112.54
chr25:38088270-38090309	404.548	1.01754	0.160985	6.32072	2.60344e-10	2.06771e-08	275.5	260.252	537.67	544.771
chr16:2262080-2266891	631.786	0.922919	0.146053	6.31908	2.63117e-10	2.08685e-08	494.28	382.325	800.661	849.878
chr26:18515715-18517069	155.72	1.81111	0.286653	6.31813	2.64749e-10	2.0969e-08	51.3187	84.7728	234.744	252.045
chr5:97207544-97210480	1141.37	0.61944	0.098059	6.31701	2.66677e-10	2.10927e-08	908.881	891.809	1376.32	1388.46
chr10:14900640-14902377	279.102	1.25328	0.198541	6.31247	2.74617e-10	2.1691e-08	160.709	168.698	421.759	365.244
chr7:82364469-82367850	1558.63	0.543472	0.0861479	6.30859	2.81581e-10	2.22106e-08	1281.62	1256.33	1814.64	1881.94
chrX:138558364-138560105	319.929	1.19645	0.189851	6.30203	2.93775e-10	2.31407e-08	179.615	207.693	481.176	411.231
chr14:73363921-73367455	2635.24	-0.43908	0.0696762	-6.30172	2.94358e-10	2.3155e-08	3098.03	2970.44	2221.79	2250.72
chr5:48283685-48287020	2059.03	0.500477	0.0794401	6.30006	2.9753e-10	2.33725e-08	1630.04	1776.84	2407.83	2421.4
chr24:43132566-43135490	507.919	0.908492	0.144216	6.29952	2.98569e-10	2.34222e-08	364.633	342.482	660.399	664.161
chr8:61013160-61015612	570.658	0.889344	0.141188	6.29902	2.99537e-10	2.34662e-08	415.952	385.716	697.413	783.551
chr17:40790058-40792998	935.811	0.739021	0.11734	6.29812	3.01281e-10	2.35707e-08	690.102	712.091	1077.29	1263.76
chr11:25460647-25464755	1337.9	-0.62883	0.0998849	-6.29555	3.06321e-10	2.39325e-08	1742.14	1510.65	1058.78	1040.02
chr21:22129589-22130686	120.551	1.95245	0.310168	6.29483	3.07727e-10	2.40098e-08	45.9167	52.5591	210.393	173.336
chr9:33174941-33176419	199.109	1.49588	0.237717	6.2927	3.11982e-10	2.43089e-08	117.493	92.4023	300.004	286.535
chr2:111074748-111078113	744.032	0.830214	0.132012	6.28891	3.19694e-10	2.48761e-08	568.557	505.246	874.688	1027.64
chr19:37700797-37702946	966.433	0.665926	0.105931	6.2864	3.24914e-10	2.52481e-08	754.925	740.066	1198.07	1172.67
chr6:23435179-23437690	454.917	0.959924	0.152872	6.27928	3.40135e-10	2.63953e-08	311.964	306.03	622.411	579.261
chr14:20871356-20874286	1440.95	-0.556176	0.0885941	-6.27779	3.43416e-10	2.6614e-08	1694.87	1735.3	1150.34	1183.29
chr6:67859111-67861916	576.948	0.870536	0.13881	6.2714	3.57805e-10	2.76919e-08	399.746	415.387	786.05	706.611
chr1:70960289-70962306	269.427	1.24553	0.198739	6.26716	3.67694e-10	2.84191e-08	168.812	151.743	385.72	371.435
chr3:20810501-20812141	220.358	1.39903	0.223385	6.26287	3.77953e-10	2.91728e-08	110.74	130.55	305.849	334.291
chr21:40182383-40184599	344.801	1.1212	0.179159	6.25813	3.89622e-10	3.00332e-08	202.574	230.582	449.032	497.015
chr15:38290806-38294727	666.977	0.7996	0.127779	6.25768	3.90749e-10	3.00798e-08	482.126	490.834	879.558	815.388
chr4:113993512-113994810	190.961	1.50823	0.24108	6.25614	3.94626e-10	3.03377e-08	108.039	91.5546	298.056	266.195
chr26:45269190-45271971	654.82	0.816317	0.130527	6.254	4.00067e-10	3.0715e-08	496.981	453.534	806.505	862.259
chr5:18519171-18522324	614.238	0.840862	0.134556	6.24916	4.12657e-10	3.16394e-08	411.9	466.25	789.946	788.857
chr20:35151865-35156337	1735.29	0.530165	0.0848432	6.24876	4.13719e-10	3.16787e-08	1374.8	1462.33	2109.77	1994.25
chr13:75123923-75125875	463.253	0.953739	0.152692	6.24617	4.20629e-10	3.2165e-08	299.809	329.766	628.256	595.18
chr7:22166341-22171240	1844.14	-0.533156	0.0853725	-6.24506	4.23647e-10	3.23528e-08	2275.58	2089.65	1451.32	1560.03
chr21:21953043-21958034	2832.12	0.421173	0.0674693	6.24243	4.30814e-10	3.28566e-08	2466	2379.57	3232.84	3250.05
chr1:7861096-7863289	322.134	1.17852	0.188997	6.23563	4.49958e-10	3.42712e-08	221.481	175.48	452.929	438.647
chr19:53827371-53829168	182.803	1.53508	0.246224	6.23448	4.5327e-10	3.44593e-08	103.988	84.7728	262.991	279.461
chr3:116645458-116648447	649.816	0.827229	0.132689	6.23436	4.53625e-10	3.44593e-08	456.466	479.814	782.154	880.831
chr13:40615865-40619033	710.241	0.793024	0.127313	6.22893	4.6962e-10	3.56274e-08	556.403	485.748	912.675	886.137
chr11:92928796-92932890	2244.06	0.496804	0.0797739	6.22765	4.73472e-10	3.58723e-08	1769.14	1948.93	2705.88	2552.29
chr1:49339561-49340865	322.799	1.13769	0.182846	6.22214	4.90427e-10	3.71081e-08	190.419	211.932	461.695	427.15
chr27:29274939-29282296	3723.12	0.435242	0.0699558	6.22166	4.91911e-10	3.71716e-08	2996.74	3329.03	4138.7	4428.03
chr22:6065097-6071254	2142.59	0.51026	0.0820747	6.21702	5.06678e-10	3.82372e-08	1657.05	1872.63	2552.96	2487.73
chr3:9576025-9580015	984.001	0.67378	0.108382	6.21669	5.07751e-10	3.82681e-08	745.472	770.584	1156.19	1263.76
chr16:59372717-59375567	669.059	0.819265	0.131835	6.21431	5.1552e-10	3.87695e-08	460.518	506.093	808.453	901.172
chr19:17397614-17409066	1813.34	0.518739	0.083476	6.21424	5.15751e-10	3.87695e-08	1447.73	1531.84	2070.81	2202.96
chr2:84670965-84676502	2164.41	0.480703	0.0773685	6.21317	5.19275e-10	3.89835e-08	1735.38	1875.17	2507.18	2539.91
chr18:44744615-44749952	718.189	0.879319	0.141537	6.21263	5.21064e-10	3.90669e-08	572.609	443.362	879.558	977.227
chr16:36798163-36799805	167.948	1.61521	0.260235	6.20675	5.4091e-10	4.05021e-08	91.8335	74.6	234.744	270.617
chr2:4027681-4030104	230.507	1.49684	0.241301	6.20322	5.53182e-10	4.13672e-08	149.905	94.0978	333.122	344.904
chr18:39740924-39744203	2026.51	0.489058	0.0788679	6.20097	5.61161e-10	4.19095e-08	1708.37	1665.78	2291.92	2439.97
chr25:14356049-14361418	2268.5	-0.549278	0.0886189	-6.1982	5.7112e-10	4.2598e-08	2880.6	2514.36	1729.89	1949.15
chr7:43695436-43700918	2264.51	0.509067	0.082171	6.19521	5.82064e-10	4.33581e-08	1832.62	1903.15	2825.69	2496.57
chr2:121218085-121222589	861.824	0.738363	0.119285	6.18993	6.01901e-10	4.47779e-08	606.371	683.268	1025.66	1131.99
chr5:25738828-25742019	694.952	0.870679	0.140669	6.18955	6.03371e-10	4.48293e-08	551.001	435.732	850.337	942.737
chr5:26914916-26920507	3044.19	0.404231	0.0653462	6.18599	6.17129e-10	4.57924e-08	2656.42	2586.42	3453.95	3479.99
chr16:53851247-53853254	124.291	1.85172	0.299581	6.18104	6.36803e-10	4.71914e-08	59.4217	49.1682	195.782	192.792
chr10:88806554-88809562	1347.37	0.572206	0.0925779	6.1808	6.37759e-10	4.72015e-08	1061.49	1104.59	1574.05	1649.35
chr8:101336279-101338022	140.33	1.91287	0.309499	6.18053	6.38872e-10	4.72233e-08	68.8751	50.0159	262.017	180.411
chr3:21947221-21951105	2846.42	0.419637	0.0679371	6.17685	6.53919e-10	4.82735e-08	2391.72	2477.06	3208.49	3308.42
chr5:83545472-83551779	2826.49	0.431202	0.0698287	6.17515	6.61025e-10	4.87356e-08	2318.8	2491.47	3227.97	3267.74
chrX:37014171-37018466	287.49	1.22126	0.197846	6.17278	6.71012e-10	4.94086e-08	155.307	188.196	421.759	384.7
chr21:54784704-54786283	179.478	1.56113	0.253253	6.1643	7.07969e-10	5.20633e-08	105.338	77.9909	263.965	270.617
chr5:60759253-60761228	354.301	1.12234	0.182131	6.16225	7.17171e-10	5.26727e-08	194.471	249.232	478.254	495.246
chr10:34820043-34823451	893.315	0.706119	0.11466	6.15837	7.34991e-10	5.39128e-08	649.587	706.157	1157.16	1060.36
chr10:73474741-73476063	167.242	1.55987	0.253314	6.15784	7.37447e-10	5.40241e-08	83.7305	85.6205	239.614	260.004
chr3:10915752-10916870	104.07	2.07324	0.336874	6.15436	7.53809e-10	5.51526e-08	39.1643	40.6909	148.054	188.371
chr13:79532612-79536107	1240.96	0.585795	0.0952675	6.14895	7.7996e-10	5.69935e-08	972.354	1011.34	1467.88	1512.27
chr14:9164912-9167269	291.27	1.24612	0.202719	6.14704	7.89442e-10	5.76133e-08	159.358	184.805	453.903	367.013
chr23:3259841-3264609	953.406	0.659878	0.107434	6.14215	8.14132e-10	5.92906e-08	742.771	735.828	1136.7	1198.32
chr4:96955001-96957239	570.47	0.848717	0.138181	6.14208	8.14485e-10	5.92906e-08	384.89	428.102	729.556	739.332
chr23:23669858-23672896	792.356	0.756648	0.123229	6.14017	8.24347e-10	5.99327e-08	540.197	634.948	999.365	994.915
chr15:38652033-38656098	3044.6	-0.414284	0.0675661	-6.13154	8.70335e-10	6.31964e-08	3380.28	3574.87	2566.6	2656.64
chr25:31585452-31588457	658.503	0.778677	0.127036	6.12956	8.81208e-10	6.3848e-08	474.023	495.073	841.57	823.347
chr28:45526790-45527869	100.618	2.17126	0.35423	6.12951	8.81526e-10	6.3848e-08	29.7108	42.3864	187.99	142.383
chr11:78742224-78745739	1224.94	0.596127	0.0972694	6.12861	8.86487e-10	6.41266e-08	939.943	1008.8	1449.37	1501.66
chr13:69767796-69769870	231.163	1.3641	0.222799	6.12254	9.20935e-10	6.65349e-08	126.946	131.398	369.161	297.148
chr10:30075028-30077630	323.149	1.11357	0.181888	6.12226	9.22561e-10	6.65689e-08	193.12	214.475	429.552	455.45
chr8:46281364-46282622	172.232	1.53184	0.250286	6.12035	9.33696e-10	6.7288e-08	91.8335	85.6205	243.51	267.964
chr13:81561635-81568007	4771.45	0.356649	0.0582939	6.11812	9.46843e-10	6.81502e-08	4232.44	4139.45	5204.3	5509.62
chr19:9996611-9999495	235.273	1.38464	0.226351	6.11723	9.52159e-10	6.84473e-08	152.606	110.205	326.303	351.979
chr22:14423221-14425480	561.336	0.875966	0.143428	6.10735	1.01298e-09	7.27289e-08	365.983	423.864	699.361	756.135
chr14:54801497-54804316	1102.66	0.715665	0.117188	6.10701	1.01518e-09	7.27958e-08	741.42	923.175	1316.9	1429.14
chr18:25035916-25038662	1086.52	-0.628859	0.103026	-6.10391	1.03507e-09	7.413e-08	1288.37	1349.58	888.324	819.81
chr10:35072015-35074362	228.934	1.33767	0.219167	6.10344	1.03809e-09	7.42539e-08	143.152	117.834	320.459	334.291
chr26:33594567-33599174	684.428	0.800934	0.131284	6.10079	1.05548e-09	7.53102e-08	490.229	507.789	808.453	931.24
chr28:26454883-26459710	1116.39	0.647566	0.106143	6.10091	1.05468e-09	7.53102e-08	806.244	929.957	1347.1	1382.27
chr7:5725072-5726877	449.829	1.06819	0.175213	6.09654	1.08391e-09	7.72431e-08	310.613	272.121	525.008	691.576
chr1:66987086-66988598	172.779	1.52652	0.250451	6.09509	1.09374e-09	7.78479e-08	89.1325	89.0114	240.588	272.386
chr7:50904052-50912226	5284.82	-0.341485	0.0560302	-6.09465	1.09674e-09	7.79647e-08	5840.88	5973.09	4540	4785.32
chr7:15276663-15280300	1418.04	-0.594962	0.097692	-6.09018	1.12782e-09	8.0075e-08	1709.72	1703.93	1045.14	1213.35
chr15:37419825-37421494	253.399	1.31676	0.216262	6.08872	1.1382e-09	8.07125e-08	122.895	165.307	376.953	348.441
chr15:58180157-58184444	1412.38	0.573198	0.0941624	6.08734	1.14804e-09	8.131e-08	1099.3	1169.86	1616.91	1763.43
chr7:44128072-44128972	64.0625	2.76443	0.454208	6.08626	1.15576e-09	8.17567e-08	18.9069	14.4114	125.651	97.2806
chr16:71075659-71079704	690.16	0.790612	0.12991	6.08583	1.15892e-09	8.18795e-08	465.92	542.546	886.376	865.797
chr29:12463755-12467630	1356.35	0.557844	0.0916959	6.08362	1.17496e-09	8.29109e-08	1074.99	1118.15	1641.26	1590.98
chr3:53902540-53905972	765.225	0.754685	0.124084	6.08203	1.18669e-09	8.36361e-08	567.207	571.368	1024.69	897.634
chr1:8220626-8222181	323.712	1.12525	0.185258	6.07394	1.24806e-09	8.78543e-08	185.017	220.409	429.552	459.872
chr12:75890002-75893205	719.455	0.770197	0.126848	6.0718	1.26482e-09	8.89252e-08	503.734	557.805	948.715	867.566
chr8:53871875-53876278	376.397	1.01288	0.166847	6.07067	1.27375e-09	8.94434e-08	240.388	257.709	501.631	505.859
chr14:30887586-30891328	635.47	0.844568	0.139137	6.07005	1.2787e-09	8.96818e-08	409.199	496.768	843.519	792.394
chr20:24454720-24458172	807.634	0.702239	0.115701	6.06945	1.28353e-09	8.98018e-08	596.918	631.557	997.417	1004.64
chr20:25786615-25792709	1715.26	0.543899	0.0896112	6.06954	1.28276e-09	8.98018e-08	1300.52	1486.07	2019.18	2055.27
chr21:32631674-32633952	550.727	0.874956	0.144198	6.06775	1.29712e-09	9.06428e-08	355.179	419.625	718.841	709.264
chr3:77408746-77410878	421.206	0.995583	0.164115	6.06639	1.30817e-09	9.13036e-08	259.295	301.791	534.748	588.99
chr18:25133243-25138933	1233.91	0.585777	0.0965659	6.06609	1.31064e-09	9.13654e-08	950.747	1020.66	1467.88	1496.35
chr12:33057775-33061763	1183.14	0.584303	0.0963751	6.0628	1.33771e-09	9.31399e-08	954.798	939.282	1418.2	1420.3
chr3:101264650-101267283	270.345	1.19357	0.196975	6.05954	1.36514e-09	9.49352e-08	160.709	167.85	386.694	366.129
chr11:3633970-3635665	246.355	1.27188	0.209984	6.05702	1.38665e-09	9.63143e-08	147.204	141.571	372.083	324.563
chr9:70441920-70444568	557.397	0.842372	0.139078	6.05681	1.38845e-09	9.63235e-08	399.746	398.432	745.141	686.27
chr8:89715556-89718391	606.078	0.812541	0.134208	6.05433	1.41005e-09	9.77044e-08	421.354	456.925	750.985	795.047
chr29:45059711-45063347	1134.23	0.602374	0.0995073	6.05356	1.41678e-09	9.80527e-08	872.418	927.414	1363.66	1373.42
chr14:27198528-27200695	409.087	0.978443	0.161646	6.05299	1.42178e-09	9.82803e-08	283.603	267.882	563.969	520.893
chr3:102254510-102257550	1564.94	-0.55865	0.0923643	-6.04833	1.46351e-09	1.01043e-07	1825.87	1902.3	1187.35	1344.24
chr1:10507138-10510193	1086.41	0.694687	0.114914	6.04526	1.49166e-09	1.02864e-07	740.07	914.698	1322.75	1368.12
chr7:27415941-27417033	62.0946	2.72824	0.451332	6.04486	1.49537e-09	1.02996e-07	17.5564	15.2591	103.248	112.315
chr19:12478264-12480489	261.395	1.22058	0.20217	6.0374	1.56619e-09	1.0774e-07	145.853	167.002	370.135	362.591
chr27:34132166-34138088	2437.5	0.429164	0.0710865	6.03721	1.56799e-09	1.0774e-07	2091.91	2064.22	2769.2	2824.67
chr7:21064807-21066474	140.447	1.7658	0.292518	6.03656	1.57431e-09	1.08046e-07	75.6276	53.4068	233.77	198.983
chr15:51204472-51208252	653.514	0.776127	0.128585	6.03591	1.5807e-09	1.08355e-07	496.981	467.946	804.557	844.572
chr1:106306355-106307315	180.99	1.46701	0.243161	6.03307	1.60872e-09	1.10145e-07	91.8335	100.032	256.172	275.923
chr18:14590593-14594632	997.512	0.652157	0.108104	6.0327	1.61246e-09	1.1027e-07	815.697	738.371	1243.85	1192.13
chr26:23228181-23232789	1750.29	0.536781	0.089026	6.02949	1.64479e-09	1.12347e-07	1447.73	1410.62	1945.16	2197.66
chr14:73720939-73724179	2296.32	-0.440404	0.0730587	-6.02808	1.65917e-09	1.13195e-07	2597	2689.84	1942.24	1956.22
chr1:52640327-52645038	678.064	0.75335	0.125003	6.02664	1.67408e-09	1.14077e-07	501.033	508.637	837.674	864.913
chr14:64223914-64230040	1708.54	0.590628	0.0980187	6.02567	1.68413e-09	1.14626e-07	1291.07	1433.51	1891.59	2218
chr3:104311147-104313954	739.614	0.735613	0.122089	6.02522	1.68877e-09	1.14806e-07	556.403	553.566	962.351	886.137
chr1:10650963-10653827	460.816	0.959757	0.159327	6.02382	1.70345e-09	1.15668e-07	286.304	337.396	643.84	575.724
chr6:71749786-71752164	214.944	1.32999	0.220812	6.02317	1.71033e-09	1.15999e-07	118.843	125.464	306.823	308.645
chr1:21924169-21926490	638.191	0.833786	0.138451	6.02226	1.71997e-09	1.16515e-07	426.756	488.291	872.74	764.979
chr5:55537686-55540293	739.793	0.861799	0.143113	6.02179	1.725e-09	1.16718e-07	595.567	458.621	1018.85	886.137
chr2:125659748-125663601	621.257	0.829947	0.13783	6.02154	1.72769e-09	1.16763e-07	432.158	461.164	853.259	738.448
chr13:78310220-78312047	246.842	1.23924	0.205818	6.02106	1.73282e-09	1.16972e-07	147.204	146.657	337.992	355.516
chr15:46815160-46817588	520.989	0.862626	0.143298	6.01981	1.74622e-09	1.17739e-07	355.179	383.173	658.451	687.154
chr25:22628182-22631397	564.033	0.82384	0.136942	6.01596	1.78825e-09	1.20432e-07	418.653	396.737	712.023	728.72
chr25:40697937-40699948	431.818	0.947476	0.15753	6.01458	1.80355e-09	1.2132e-07	283.603	305.182	589.294	549.193
chr13:27556163-27563054	3064.2	0.40402	0.0672105	6.01126	1.84082e-09	1.23683e-07	2559.18	2712.73	3536.74	3448.15
chr22:31884457-31886237	261.864	1.22778	0.204479	6.00444	1.91997e-09	1.28851e-07	149.905	162.764	392.538	342.251
chr21:34632798-34644769	4265.88	0.359213	0.0598277	6.00412	1.92371e-09	1.28951e-07	3628.77	3841.9	4765.98	4826.88
chr10:45409220-45412287	427.406	0.960054	0.159956	6.00198	1.94925e-09	1.3036e-07	294.407	286.532	530.852	597.833
chr17:68466852-68470402	1458.46	-0.557134	0.0928228	-6.00213	1.94748e-09	1.3036e-07	1817.76	1658.16	1145.47	1212.47
chr12:77124969-77126137	195.59	1.42392	0.237427	5.9973	2.00629e-09	1.34019e-07	112.091	100.88	305.849	263.542
chr16:79286001-79289727	1237.35	-0.573986	0.0957985	-5.9916	2.07792e-09	1.38643e-07	1516.6	1445.38	973.066	1014.37
chr26:42158615-42162775	762.191	0.728798	0.121716	5.98771	2.12811e-09	1.41827e-07	565.856	580.693	998.391	903.825
chr20:6836929-6838684	154.397	1.57233	0.26264	5.98663	2.14234e-09	1.42611e-07	78.3286	77.1432	235.718	226.398
chr17:63213213-63215386	687.607	0.753504	0.126	5.98017	2.22904e-09	1.4821e-07	518.589	506.093	829.882	895.865
chr5:107248916-107250832	179.147	1.44973	0.242516	5.97787	2.26071e-09	1.50143e-07	97.2354	94.9455	259.095	265.311
chr24:57208613-57210722	344.226	1.06348	0.177911	5.97764	2.26397e-09	1.50186e-07	218.78	226.343	495.786	435.994
chr3:76794327-76797300	346.853	1.03435	0.173205	5.97179	2.34669e-09	1.55494e-07	221.481	233.125	468.513	464.294
chr10:26038792-26040528	447.498	0.961932	0.161253	5.96536	2.44089e-09	1.6155e-07	299.809	306.877	643.84	539.465
chr29:8999853-9003075	580.678	0.908262	0.152288	5.96412	2.45962e-09	1.62603e-07	378.138	427.255	842.545	674.773
chr28:45787251-45788507	103.409	1.9613	0.329013	5.96116	2.50453e-09	1.65382e-07	39.1643	44.9296	159.743	169.799
chr18:61564101-61567440	1082.27	0.617665	0.103674	5.95775	2.55728e-09	1.68672e-07	812.996	892.657	1291.58	1331.86
chr12:75349204-75350442	131.081	1.73896	0.291975	5.95585	2.58717e-09	1.70448e-07	67.5246	54.2546	193.834	208.711
chr18:65191426-65193353	573.003	-0.81069	0.136157	-5.95408	2.61545e-09	1.72115e-07	703.607	755.325	422.733	410.347
chr1:71090021-71093408	404.256	0.977765	0.164273	5.95208	2.64752e-09	1.74026e-07	253.893	289.075	552.281	521.778
chr3:103890030-103893758	797.38	0.74157	0.124691	5.94725	2.7268e-09	1.79033e-07	640.133	556.109	1046.12	947.159
chr6:101792187-101793992	211.627	1.37039	0.230473	5.94598	2.74811e-09	1.80227e-07	122.895	113.595	334.096	275.923
chr22:28727892-28729373	163.855	1.55241	0.261176	5.94391	2.7831e-09	1.82314e-07	76.9781	89.0114	225.003	264.426
chr6:3548480-3551101	603.293	0.789644	0.13289	5.94211	2.81376e-09	1.84113e-07	456.466	428.95	773.388	754.366
chr5:111608288-111610118	451.15	0.902672	0.151962	5.9401	2.8484e-09	1.86167e-07	307.912	320.441	586.372	589.874
chr9:25350272-25353705	771.312	0.748	0.125932	5.9397	2.85547e-09	1.86418e-07	540.197	608.668	1023.72	912.668
chr5:104049635-104052525	503.819	0.894652	0.150671	5.93777	2.8893e-09	1.88413e-07	320.067	382.325	658.451	654.433
chr13:10725731-10730208	1176.12	0.599298	0.100957	5.93619	2.91714e-09	1.90013e-07	979.107	894.353	1375.34	1455.67
chr11:73670117-73671677	285.552	1.19369	0.201165	5.93386	2.95893e-09	1.92518e-07	193.12	155.982	420.785	372.319
chr20:56082431-56086295	1482.76	0.543878	0.0916745	5.93271	2.97976e-09	1.93654e-07	1141.17	1268.2	1759.12	1762.55
chr26:10882643-10884233	168.365	1.53639	0.259033	5.93125	3.00633e-09	1.9516e-07	75.6276	95.7932	265.913	236.126
chr18:49214139-49215522	119.227	1.91771	0.323585	5.92646	3.09528e-09	2.00605e-07	59.4217	41.5387	212.341	163.608
chr8:11662908-11666849	1102.53	0.604558	0.102012	5.92636	3.09716e-09	2.00605e-07	872.418	877.398	1278.91	1381.38
chr1:145135055-145145912	5062.62	-0.369066	0.0623242	-5.92172	3.18598e-09	2.05895e-07	5527.57	5883.23	4231.23	4608.45
chr15:35621638-35623061	107.748	1.91575	0.323504	5.92189	3.18258e-09	2.05895e-07	40.5148	49.1682	162.665	178.642
chr2:123469408-123472286	1412.86	-0.536123	0.0905517	-5.92063	3.20715e-09	2.0703e-07	1720.53	1625.94	1136.7	1168.25
chr10:37635813-37639980	869.503	0.697249	0.11778	5.91993	3.22085e-09	2.07218e-07	669.844	656.989	1147.42	1003.76
chr20:23103227-23104640	160.331	1.59198	0.268908	5.92015	3.21649e-09	2.07218e-07	71.5761	87.3159	216.237	266.195
chr4:69390954-69392674	151.816	1.6595	0.280322	5.91996	3.22014e-09	2.07218e-07	63.4731	81.3818	258.121	204.289
chr2:22553717-22558589	440.828	0.908303	0.153578	5.91428	3.33328e-09	2.14212e-07	310.613	302.639	580.528	569.533
chr11:21017547-21023077	1608.41	0.509672	0.0861912	5.91328	3.35368e-09	2.15282e-07	1285.67	1366.54	1862.36	1919.08
chr12:55423852-55427063	1464.08	0.604515	0.102297	5.90942	3.43324e-09	2.20144e-07	1238.4	1089.33	1642.23	1886.36
chr1:96084957-96087181	646.024	0.810913	0.137257	5.908	3.46279e-09	2.21792e-07	424.055	511.18	801.635	847.225
chr7:43274519-43282826	2228.29	-0.435264	0.0737826	-5.89928	3.65097e-09	2.33585e-07	2553.78	2569.46	1925.68	1864.25
chr4:94716212-94720010	1404.84	0.591018	0.100203	5.89823	3.67424e-09	2.34813e-07	1192.48	1053.73	1596.45	1776.7
chr8:52144661-52147207	491.098	0.857851	0.145575	5.89284	3.7962e-09	2.42338e-07	353.829	345.025	634.1	631.439
chr1:79081839-79090932	2432.51	0.483205	0.082015	5.89166	3.82328e-09	2.43797e-07	1885.29	2166.79	2760.43	2917.53
chr2:127674476-127677802	2137.61	0.469484	0.0797184	5.88928	3.87877e-09	2.47061e-07	1792.1	1792.94	2599.71	2365.69
chr20:24283281-24286339	295.619	1.28778	0.218895	5.88307	4.02722e-09	2.56233e-07	130.998	209.389	414.941	427.15
chr11:85534215-85537275	812.937	0.752231	0.127869	5.88282	4.03342e-09	2.56345e-07	537.496	669.705	1026.64	1017.91
chr19:22585408-22590240	1662.25	0.504507	0.0857898	5.88073	4.08451e-09	2.59306e-07	1326.18	1419.94	1989.96	1912.89
chr8:20427946-20430238	320.457	1.14738	0.195146	5.87962	4.11218e-09	2.60775e-07	230.934	170.393	438.318	442.184
chr25:16893923-16896943	1243.62	0.575175	0.0979724	5.87079	4.33723e-09	2.7449e-07	971.004	1024.9	1546.78	1431.79
chr5:55658516-55660116	145.897	1.59552	0.271774	5.87076	4.33799e-09	2.7449e-07	76.9781	68.6659	213.315	224.63
chr4:76815055-76818022	534.264	0.829718	0.141337	5.87049	4.34516e-09	2.74642e-07	372.736	395.889	666.243	702.189
chr15:35531870-35537955	1484.39	0.518552	0.0883525	5.86913	4.38085e-09	2.76594e-07	1234.35	1207.16	1788.34	1707.72
chr9:42600552-42602887	289.211	1.11019	0.189241	5.86652	4.45034e-09	2.80674e-07	185.017	181.414	391.564	398.85
chr8:64044945-64047070	168.858	1.47745	0.25188	5.8657	4.47251e-09	2.81763e-07	83.7305	94.0978	256.172	241.433
chr9:89206022-89208856	453.271	0.94391	0.160951	5.86457	4.50308e-09	2.83379e-07	291.706	327.223	550.333	643.82
chr20:62684391-62707853	5156.17	0.33147	0.0565328	5.86332	4.53691e-09	2.85196e-07	4437.72	4690.48	5693.26	5803.23
chr26:44263024-44264222	87.251	2.23046	0.380973	5.85464	4.7803e-09	3.00169e-07	37.8138	24.5841	125.651	160.955
chr9:52597844-52599542	471.778	0.883168	0.15088	5.85345	4.81481e-09	3.02006e-07	317.366	345.025	594.164	630.555
chr7:37849947-37852087	377.054	1.02728	0.175513	5.85302	4.82717e-09	3.02452e-07	259.295	238.211	459.747	550.962
chr2:36769283-36772272	649.047	0.767854	0.131193	5.85284	4.83246e-09	3.02454e-07	449.714	508.637	825.986	811.85
chr17:69265988-69278881	4387.39	-0.350393	0.0598852	-5.85107	4.88419e-09	3.0536e-07	5075.15	4764.23	3835.77	3874.42
chr15:10043158-10047755	3040.62	-0.385821	0.0659493	-5.85027	4.90766e-09	3.06495e-07	3387.03	3501.12	2602.63	2671.68
chr1:96072422-96080589	1644.8	0.503358	0.0860794	5.8476	4.98721e-09	3.11125e-07	1308.63	1409.77	1955.87	1904.93
chr20:26040878-26047226	2568.12	0.428621	0.0733108	5.84662	5.01655e-09	3.12617e-07	2171.59	2205.79	3063.36	2831.75
chr13:36128932-36134683	722.543	0.731461	0.125115	5.84631	5.02595e-09	3.12864e-07	518.589	566.282	867.87	937.431
chr13:81138639-81142768	1552.79	0.558585	0.095566	5.84502	5.06517e-09	3.14965e-07	1342.39	1174.1	1774.7	1919.96
chr1:93907666-93912390	1230.18	-0.561521	0.0961037	-5.84286	5.13112e-09	3.18378e-07	1465.28	1468.26	960.403	1026.75
chr25:13036580-13039132	480.03	-0.86415	0.147894	-5.84302	5.12636e-09	3.18378e-07	633.381	606.125	351.628	328.985
chr24:53002597-53004161	238.183	1.23219	0.2109	5.84254	5.1411e-09	3.18654e-07	148.554	136.484	345.784	321.91
chr15:42222730-42227875	3459.32	-0.365767	0.0626251	-5.84059	5.20172e-09	3.22065e-07	3893.47	3897	3077.97	2968.83
chr6:100831991-100835281	550.264	0.836425	0.143246	5.83909	5.24862e-09	3.24619e-07	388.942	400.975	659.425	751.713
chr11:29932589-29936334	728.754	0.846126	0.144931	5.83815	5.2784e-09	3.26111e-07	438.91	598.496	913.649	963.962
chr18:16930267-16936950	1755.46	0.487181	0.0834885	5.83531	5.36894e-09	3.3135e-07	1413.97	1507.26	2015.29	2085.34
chr23:18927538-18932852	1028.52	0.604653	0.103658	5.83315	5.43913e-09	3.35322e-07	794.089	836.707	1229.24	1254.03
chr13:67992377-67995057	625.525	0.794155	0.136172	5.83198	5.47738e-09	3.37319e-07	495.631	422.168	801.635	782.666
chr22:50420274-50421702	178.548	1.46821	0.251774	5.83148	5.49387e-09	3.37973e-07	94.5345	94.9455	291.238	233.473
chr5:18743390-18744827	282.472	1.1466	0.19681	5.82592	5.67971e-09	3.49033e-07	159.358	190.739	381.824	397.966
chr6:59637116-59638529	84.9868	2.24545	0.385624	5.82292	5.78293e-09	3.54997e-07	36.4633	23.7364	156.82	122.927
chr14:40175242-40177216	584.661	0.848414	0.145837	5.81756	5.97144e-09	3.66178e-07	403.797	430.646	680.854	823.347
chr17:62407413-62411482	1239.99	0.569554	0.0980148	5.8109	6.21397e-09	3.80645e-07	999.364	997.775	1414.31	1548.53
chrUn_NW_020190994v1:135519-137293	238.468	1.30292	0.224293	5.80903	6.28352e-09	3.84497e-07	159.358	117.834	318.511	358.169
chr7:33472204-33473763	484.72	0.853446	0.146982	5.80648	6.37989e-09	3.89979e-07	340.324	350.112	611.697	636.745
chr22:18949262-18951163	237.208	1.23646	0.213035	5.80402	6.47454e-09	3.95345e-07	148.554	134.789	350.654	314.835
chr19:20529955-20536894	1835.82	0.473208	0.0816454	5.79589	6.79589e-09	4.14528e-07	1559.82	1516.58	2072.76	2194.12
chr25:13547085-13549782	554.85	0.810572	0.139894	5.79418	6.86545e-09	4.18327e-07	415.952	390.802	733.452	679.195
chr14:19598424-19600967	504.487	0.846547	0.146307	5.7861	7.20406e-09	4.38496e-07	359.231	361.98	617.541	679.195
chr22:33859008-33864255	773.304	0.720032	0.124468	5.7849	7.25551e-09	4.41161e-07	584.763	584.084	893.195	1031.17
chr20:41407000-41412322	4640.29	0.353243	0.0610701	5.78421	7.28528e-09	4.42504e-07	3954.24	4192.01	5049.42	5365.46
chr24:41932847-41935613	828.088	0.669472	0.115857	5.77842	7.54037e-09	4.57515e-07	636.082	642.578	975.988	1057.7
chr1:118000975-118002030	101.533	1.90563	0.330216	5.77086	7.88675e-09	4.78028e-07	43.2158	42.3864	167.535	152.996
chr11:60745889-60748894	606.436	0.776357	0.134574	5.769	7.97432e-09	4.82828e-07	428.106	464.555	792.868	740.217
chr11:55263926-55267046	356.464	1.05681	0.183382	5.76292	8.26716e-09	5.00033e-07	217.429	244.146	531.826	432.456
chr10:12205906-12209803	2016.08	-0.479653	0.0832885	-5.75893	8.46478e-09	5.11449e-07	2266.13	2428.74	1604.24	1765.2
chr11:89877467-89881237	2142.04	-0.483898	0.0840511	-5.75719	8.55253e-09	5.16209e-07	2455.2	2540.64	1665.61	1906.7
chr8:63785864-63789070	395.076	0.935679	0.162589	5.75487	8.67062e-09	5.22789e-07	261.996	279.75	522.085	516.471
chr4:57508669-57512123	967.484	0.665047	0.115621	5.75197	8.821e-09	5.31299e-07	738.719	757.868	1091.9	1281.45
chr1:147177378-147182650	1141.92	0.584479	0.101632	5.75091	8.87624e-09	5.34068e-07	943.994	885.028	1419.18	1319.48
chr16:29119339-29121683	413.327	0.936058	0.162778	5.75052	8.8971e-09	5.34764e-07	303.861	265.339	526.956	557.152
chr21:22029941-22032078	293.877	1.11825	0.194601	5.74634	9.11943e-09	5.47556e-07	179.615	190.739	369.161	435.994
chr5:51256934-51258287	266.371	1.14748	0.199798	5.74317	9.29185e-09	5.57327e-07	153.956	176.327	368.187	367.013
chr14:76571997-76576768	1889	-0.463267	0.0806669	-5.74296	9.30367e-09	5.57455e-07	2135.13	2242.24	1625.67	1552.95
chr26:11026190-11029392	690.244	0.73724	0.12838	5.74263	9.32156e-09	5.57946e-07	553.702	484.052	860.077	863.144
chr14:31259601-31261305	235.809	1.30115	0.226618	5.74161	9.37803e-09	5.60744e-07	113.441	156.83	316.563	356.401
chr16:45225887-45232286	2550.75	0.440717	0.0768134	5.7375	9.60819e-09	5.7391e-07	2094.61	2231.22	2801.34	3075.83
chr25:40721375-40723118	592.808	0.794794	0.138542	5.73686	9.64455e-09	5.7505e-07	453.765	414.539	791.894	711.032
chr7:1415752-1418853	460.765	0.877064	0.152883	5.73682	9.64724e-09	5.7505e-07	329.52	320.441	625.334	567.765
chr11:98313731-98320733	1483.74	0.576006	0.100428	5.7355	9.72227e-09	5.78923e-07	1077.69	1299.57	1785.42	1772.27
chr18:44616339-44619151	310.124	1.13901	0.198661	5.73342	9.84235e-09	5.85467e-07	220.13	169.546	394.486	456.334
chr23:27583324-27585726	391.649	0.960757	0.16767	5.73004	1.00406e-08	5.96643e-07	247.14	283.141	497.734	538.581
chr24:26293507-26295479	321.424	1.07076	0.186969	5.72694	1.02259e-08	6.06402e-07	222.831	193.282	406.175	463.409
chr9:54844799-54847438	595.236	0.814275	0.142182	5.727	1.02221e-08	6.06402e-07	457.817	406.909	811.375	704.842
chr16:45391527-45393483	310.844	1.07465	0.187888	5.71962	1.06764e-08	6.32464e-07	218.78	183.109	427.604	413.885
chr16:59809647-59811773	409.938	0.920502	0.16096	5.71881	1.07274e-08	6.34835e-07	283.603	283.141	560.073	512.934
chr10:16187153-16190134	1480.45	-0.508427	0.0889378	-5.71666	1.08639e-08	6.41892e-07	1686.76	1788.71	1240.93	1205.39
chr3:30645067-30647535	518.452	0.88529	0.154864	5.71658	1.08689e-08	6.41892e-07	334.922	391.65	618.515	728.72
chr7:20471413-20478041	1502.43	0.550412	0.0962916	5.7161	1.08999e-08	6.43058e-07	1173.58	1263.11	1673.4	1899.62
chr12:69697055-69697566	126.776	1.66126	0.290709	5.71451	1.10018e-08	6.48406e-07	60.7722	61.0364	188.964	196.33
chr13:56597605-56599202	105.857	1.97953	0.346617	5.71098	1.12327e-08	6.61341e-07	29.7108	54.2546	171.431	168.03
chr11:70644777-70648969	2527.48	-0.403549	0.0706963	-5.70821	1.14172e-08	6.71516e-07	2850.89	2906.01	2134.12	2218.88
chr1:36077838-36081885	840.865	0.71593	0.125519	5.70378	1.1718e-08	6.88504e-07	605.021	666.314	957.481	1134.65
chr25:9497136-9499728	636.459	0.760727	0.133418	5.70185	1.18514e-08	6.95455e-07	449.714	493.377	838.648	764.095
chr4:8392261-8394139	306.265	1.13912	0.199786	5.70172	1.18605e-08	6.95455e-07	180.966	200.911	369.161	474.022
chr2:89908318-89909848	257.99	1.14879	0.201522	5.70057	1.1941e-08	6.99411e-07	153.956	166.155	364.291	347.557
chr22:27940709-27946278	2974.95	0.43333	0.0760174	5.70041	1.19522e-08	6.99411e-07	2438.99	2621.17	3226.99	3612.65
chr19:30663874-30670533	3370.16	-0.365728	0.0641704	-5.69932	1.20285e-08	7.02814e-07	3709.8	3877.51	2986.41	2906.92
chr8:297456-299561	332.711	1.1167	0.195938	5.69923	1.20348e-08	7.02814e-07	220.13	200.911	391.564	518.24
chr5:54482722-54486586	390.656	0.963728	0.169214	5.69531	1.2315e-08	7.18452e-07	275.5	255.166	479.228	552.73
chr12:32634809-32637035	295.767	1.06966	0.187822	5.69509	1.2331e-08	7.18654e-07	198.522	183.957	396.434	404.156
chr11:53970904-53973787	877.693	0.63813	0.112101	5.69244	1.25238e-08	7.29155e-07	688.751	684.964	1032.48	1104.58
chr5:32211272-32213505	216.423	1.275	0.224057	5.69049	1.26675e-08	7.36774e-07	139.101	115.291	300.004	311.298
chr17:61029666-61031013	158.856	1.62297	0.285293	5.68878	1.27947e-08	7.43421e-07	98.5859	59.3409	229.873	247.623
chr5:94991029-94993853	811.048	0.754428	0.132721	5.68431	1.31343e-08	7.62387e-07	529.393	673.943	976.962	1063.9
chr8:96621914-96626712	621.238	0.808955	0.142368	5.68216	1.33004e-08	7.70474e-07	503.734	402.671	796.765	781.782
chrX:102177963-102180471	576.399	0.787571	0.138601	5.68227	1.32917e-08	7.70474e-07	405.148	439.123	762.673	698.651
chr15:82281369-82284589	709.307	-0.705656	0.124204	-5.68144	1.33562e-08	7.72926e-07	857.563	900.287	562.021	517.356
chr14:21407688-21408345	122.57	1.71016	0.301109	5.67953	1.35064e-08	7.80834e-07	64.8236	50.8637	187.99	186.602
chr29:42220503-42222144	132.473	1.69305	0.298219	5.67721	1.3691e-08	7.89921e-07	49.9682	73.7523	194.808	211.364
chr5:62872563-62874959	221.796	1.24164	0.218702	5.67732	1.36825e-08	7.89921e-07	122.895	139.875	317.537	306.876
chr19:48987752-48989822	248.935	1.15729	0.203865	5.67675	1.37281e-08	7.91267e-07	153.956	154.286	339.94	347.557
chr22:44077311-44079044	276.067	1.10536	0.194743	5.67598	1.37897e-08	7.94024e-07	179.615	171.241	364.291	389.122
chr20:38347816-38348336	40.4172	3.45199	0.608586	5.67215	1.4102e-08	8.11198e-07	6.75246	6.78182	72.079	76.0557
chr5:115289986-115294251	974.424	-0.647784	0.114262	-5.66928	1.43399e-08	8.24058e-07	1269.46	1112.22	722.738	793.279
chr4:106695994-106698566	298.72	1.16049	0.204714	5.66884	1.43764e-08	8.2468e-07	153.956	212.78	436.37	391.775
chr8:11087169-11087955	78.991	2.19434	0.387091	5.66881	1.43794e-08	8.2468e-07	29.7108	27.1273	144.158	114.968
chr1:64892431-64897065	1030.34	0.64738	0.114245	5.6666	1.45657e-08	8.34535e-07	731.967	869.769	1307.16	1212.47
chr18:39761428-39763642	274.253	1.15525	0.203939	5.66468	1.473e-08	8.43112e-07	167.461	172.089	417.863	339.598
chr5:5427279-5430486	1864.01	0.501739	0.0885786	5.66434	1.4759e-08	8.43932e-07	1501.75	1581.86	2326.01	2046.43
chr16:57987913-57992671	1530.88	-0.51449	0.0908572	-5.66262	1.4908e-08	8.50866e-07	1761.04	1840.42	1199.04	1323.02
chr25:39258774-39263547	2810.37	-0.393763	0.0695376	-5.6626	1.49098e-08	8.50866e-07	3206.07	3178.13	2347.44	2509.84
chr17:51414875-51422839	2614.84	-0.393321	0.0694641	-5.66222	1.49429e-08	8.51908e-07	3002.14	2937.38	2226.66	2293.17
chr22:52563109-52566427	792.736	0.668552	0.118109	5.66049	1.50943e-08	8.59689e-07	583.413	639.187	971.118	977.227
chr2:47238707-47239866	153.512	1.51231	0.267272	5.65833	1.52851e-08	8.69694e-07	86.4315	73.7523	213.315	240.548
chr24:37200724-37206022	1662.96	-0.477695	0.0844342	-5.65761	1.53498e-08	8.72516e-07	1981.17	1892.13	1362.68	1415.87
chr14:63202739-63207310	3327.53	-0.371687	0.0657081	-5.65664	1.54368e-08	8.76597e-07	3640.93	3863.94	2855.88	2949.37
chrX:111670818-111673289	415.441	0.937613	0.165946	5.6501	1.60354e-08	9.09691e-07	284.954	284.836	593.19	498.784
chr1:68001327-68003852	375.912	0.961976	0.170287	5.64915	1.61244e-08	9.13836e-07	263.346	247.536	466.565	526.199
chr22:51447587-51450245	1453.45	-0.550503	0.0974548	-5.64881	1.61564e-08	9.14752e-07	1600.33	1851.44	1161.06	1200.97
chr7:60736559-60737932	214.278	1.25439	0.222237	5.64441	1.6575e-08	9.37531e-07	126.946	126.311	286.368	317.488
chr7:44980122-44982905	1921.83	-0.440859	0.0781098	-5.64409	1.66057e-08	9.38344e-07	2204	2221.89	1651	1610.44
chr14:33966676-33968620	483.98	0.835296	0.148019	5.64317	1.66951e-08	9.42472e-07	352.478	343.33	598.061	642.052
chr19:10610138-10613860	903.323	0.645926	0.114501	5.6412	1.68866e-08	9.52347e-07	656.339	749.391	1116.25	1091.31
chr11:21847751-21852712	4379.24	0.324237	0.0574829	5.64058	1.69475e-08	9.54509e-07	3855.66	3921.59	4814.68	4925.05
chr17:72280621-72283375	1750.47	0.459294	0.0814283	5.64048	1.69581e-08	9.54509e-07	1476.09	1472.5	2000.68	2052.62
chr1:79580813-79582997	333.816	1.03694	0.183845	5.64029	1.69761e-08	9.54593e-07	224.182	213.627	487.994	409.463
chr9:94610839-94614996	1276.47	-0.533382	0.0946343	-5.63624	1.73799e-08	9.76346e-07	1543.61	1476.74	1068.52	1017.02
chr1:77356532-77359881	472.048	0.853972	0.151615	5.63251	1.77608e-08	9.96059e-07	341.675	331.461	575.658	639.399
chr1:141975894-141976979	124.747	1.69844	0.301554	5.63229	1.77828e-08	9.96059e-07	51.3187	65.275	205.522	176.874
chr4:24767503-24774192	1461.99	0.514961	0.0914296	5.63232	1.77801e-08	9.96059e-07	1150.62	1253.79	1756.19	1687.38
chr12:18509213-18511642	500.059	0.81124	0.144048	5.63172	1.78426e-08	9.98438e-07	363.282	362.827	640.918	633.208
chr23:45867919-45871324	996.642	0.623189	0.110727	5.62816	1.82145e-08	1.01826e-06	757.626	810.428	1140.6	1277.91
chr5:74774356-74807663	7773.06	0.280255	0.0498048	5.62706	1.83302e-08	1.02374e-06	6990.15	7050.55	8329.02	8722.53
chr7:6881017-6883589	207.26	1.28648	0.228647	5.62652	1.83883e-08	1.02598e-06	130.998	111.052	304.874	282.114
chr26:24864364-24870462	1934.05	0.443095	0.0787565	5.62614	1.84285e-08	1.02723e-06	1609.79	1667.48	2199.38	2259.56
chr3:48456693-48462378	593.801	0.760807	0.135232	5.62594	1.84496e-08	1.02742e-06	430.807	450.143	716.893	777.36
chr6:5966279-5968152	316.568	1.01871	0.181122	5.62446	1.86094e-08	1.03531e-06	205.275	212.78	433.448	414.769
chr14:21713653-21716285	1188.77	-0.541483	0.09633	-5.62113	1.8971e-08	1.05441e-06	1426.12	1392.82	982.806	953.349
chr6:60372411-60374690	597.824	0.766367	0.136344	5.62085	1.90021e-08	1.05512e-06	414.601	468.793	740.27	767.632
chr13:52369663-52371428	360.553	1.00472	0.178783	5.61975	1.91233e-08	1.06083e-06	259.295	222.105	446.11	514.703
chr10:61599045-61611220	4334.74	0.350049	0.0623103	5.61783	1.93371e-08	1.07166e-06	3642.28	3974.15	4868.25	4854.3
chr4:39653193-39655985	496.387	0.979379	0.174398	5.61578	1.95672e-08	1.08337e-06	270.098	394.193	634.1	687.154
chr13:17392818-17396538	539.538	0.81827	0.14572	5.61534	1.96171e-08	1.08509e-06	415.952	367.066	652.607	722.529
chr26:44128780-44131909	849.032	0.768509	0.136887	5.6142	1.97468e-08	1.09121e-06	541.547	710.396	1004.24	1139.95
chr5:50906296-50911219	4901.08	0.311613	0.0555198	5.61264	1.99258e-08	1.10005e-06	4313.47	4431.92	5386.44	5472.47
chr9:8721717-8724723	633.626	0.724521	0.129136	5.61055	2.01686e-08	1.11238e-06	484.827	471.337	775.336	803.007
chr2:131015879-131018191	807.299	0.698299	0.124516	5.6081	2.04563e-08	1.12717e-06	665.793	568.825	954.559	1040.02
chr4:101572435-101574608	337.567	1.02262	0.182413	5.60604	2.07011e-08	1.13957e-06	209.326	234.821	486.046	420.075
chr21:23081927-23084778	568.862	0.788227	0.140626	5.60515	2.08075e-08	1.14433e-06	394.344	438.275	753.907	688.923
chrUn_NW_020190496v1:91109-94218	1171.2	-0.573345	0.102332	-5.6028	2.10918e-08	1.15886e-06	1481.49	1322.46	958.455	922.397
chr2:92986163-92988296	432.881	0.876299	0.156499	5.59938	2.15118e-08	1.18081e-06	309.263	301.791	537.67	582.799
chr9:31183280-31187605	1262.75	0.541831	0.0967991	5.59748	2.17485e-08	1.19267e-06	987.21	1067.29	1463.01	1533.5
chr11:62625842-62628316	177.042	1.42811	0.255364	5.59245	2.23885e-08	1.22659e-06	83.7305	106.814	281.498	236.126
chr25:38280025-38288916	4287.46	0.352694	0.0631198	5.58768	2.30118e-08	1.25955e-06	3801.64	3732.54	4600.39	5015.25
chr8:21909079-21912730	1128.82	0.596286	0.106727	5.58701	2.31012e-08	1.26217e-06	899.428	897.744	1455.22	1262.88
chrX:46453917-46456274	479.984	0.823374	0.147373	5.58699	2.31037e-08	1.26217e-06	353.829	339.939	619.489	606.677
chr16:79444752-79446137	138.811	1.56076	0.279377	5.58655	2.31624e-08	1.26418e-06	63.4731	76.2955	209.419	206.058
chr3:86116589-86118085	150.373	1.49207	0.267204	5.58402	2.35027e-08	1.28154e-06	83.7305	74.6	212.341	230.82
chr9:91756881-91758611	675.221	-0.705603	0.126382	-5.58308	2.36297e-08	1.28725e-06	803.543	869.769	508.449	519.124
chr9:86873757-86875319	188.097	1.3215	0.236761	5.58156	2.38371e-08	1.29732e-06	102.637	111.9	261.043	276.807
chr29:16783125-16786722	1321.59	0.589599	0.105649	5.58072	2.39529e-08	1.30239e-06	1066.89	1043.55	1730.87	1445.06
chr3:648711-651881	538.043	0.794116	0.142309	5.5802	2.40236e-08	1.305e-06	378.138	407.757	710.075	656.202
chr28:33631084-33634579	655.852	0.745123	0.133571	5.57849	2.42618e-08	1.3167e-06	494.28	486.596	761.699	880.831
chr13:11799171-11801584	924.339	0.613892	0.110155	5.57299	2.50409e-08	1.3577e-06	763.028	700.223	1125.99	1108.11
chr2:128861441-128864712	1004.13	0.591754	0.106256	5.56914	2.56004e-08	1.38673e-06	765.729	834.164	1197.1	1219.54
chr18:40255851-40257871	1032.49	0.571827	0.102731	5.56625	2.60282e-08	1.4063e-06	815.697	844.337	1238	1231.93
chr3:91159490-91161547	385.309	0.924033	0.166008	5.5662	2.60349e-08	1.4063e-06	274.15	258.557	484.098	524.431
chr4:67056268-67057214	74.6385	2.29935	0.413081	5.56633	2.60165e-08	1.4063e-06	18.9069	30.5182	141.236	107.893
chr23:5507453-5508852	245.536	1.17321	0.210836	5.56455	2.6283e-08	1.41837e-06	147.204	154.286	313.641	367.013
chrX:58829311-58830979	85.1129	2.07299	0.372593	5.56368	2.64138e-08	1.42409e-06	39.1643	27.1273	144.158	130.002
chr4:101371479-101372604	85.9266	2.17275	0.390659	5.56174	2.67098e-08	1.4387e-06	41.8653	22.0409	128.573	151.227
chr28:14068328-14081345	3256.82	0.371918	0.0668888	5.56025	2.69389e-08	1.44969e-06	2749.6	2925.51	3597.13	3755.03
chr25:34753293-34754691	151.079	1.47302	0.264942	5.55978	2.70109e-08	1.45221e-06	75.6276	83.925	220.133	224.63
chr19:10406402-10409380	542.313	0.860531	0.154793	5.55924	2.70945e-08	1.45534e-06	399.746	371.305	778.258	619.942
chr24:49267808-49273086	1677.16	-0.493605	0.0887943	-5.55897	2.71364e-08	1.45624e-06	1987.92	1936.21	1312.03	1472.47
chr3:70113826-70116107	729.984	0.678474	0.122068	5.55815	2.72647e-08	1.46176e-06	556.403	566.282	866.896	930.356
chr5:27037692-27042881	1347.57	0.520456	0.0936456	5.55772	2.73318e-08	1.46399e-06	1151.97	1064.75	1609.11	1564.45
chr12:12193458-12194765	203.677	1.26019	0.226786	5.55672	2.74885e-08	1.47102e-06	114.792	124.616	293.186	282.114
chr6:65078309-65081402	822.721	0.77471	0.139434	5.5561	2.75868e-08	1.47491e-06	510.486	698.528	1028.59	1053.28
chr5:113047997-113050388	531.619	0.798511	0.143771	5.55405	2.79126e-08	1.49094e-06	409.199	368.762	651.633	696.883
chr21:66932098-66933546	239.723	1.16661	0.210069	5.55344	2.80094e-08	1.49473e-06	137.75	156.83	328.251	336.06
chr3:53374744-53376306	261.147	1.26525	0.227977	5.54992	2.85802e-08	1.52378e-06	117.493	186.5	369.161	371.435
chr9:95980585-95982169	182.312	1.37097	0.24708	5.5487	2.87802e-08	1.53302e-06	114.792	89.8591	270.783	253.814
chr10:86435685-86439831	880.276	0.687478	0.123915	5.54797	2.89006e-08	1.53801e-06	606.371	738.371	1132.81	1043.56
chr15:64335233-64337659	1149.14	-0.546117	0.0984529	-5.54698	2.90639e-08	1.54527e-06	1401.81	1327.54	935.078	932.125
chr23:3952916-3954889	553.64	0.778262	0.140379	5.54402	2.956e-08	1.5702e-06	394.344	420.473	670.139	729.604
chr25:22049293-22052053	915.888	-0.644748	0.116594	-5.52987	3.2047e-08	1.70074e-06	1029.08	1202.93	717.867	713.686
chr14:73676389-73679197	1212.32	-0.572005	0.103445	-5.52955	3.21051e-08	1.70225e-06	1365.35	1531	1020.79	932.125
chr23:45560832-45562177	99.4322	1.95188	0.353058	5.5285	3.22979e-08	1.7109e-06	35.1128	45.7773	185.068	131.771
chr6:37142368-37143873	107.5	1.76007	0.31838	5.52819	3.23551e-08	1.71235e-06	45.9167	51.7114	161.691	170.683
chr6:58127019-58129119	165.509	1.45368	0.262978	5.52777	3.24323e-08	1.71486e-06	75.6276	100.032	259.095	227.283
chr11:44753987-44755449	120.894	1.64267	0.297512	5.52136	3.36391e-08	1.77379e-06	60.7722	56.7977	181.171	184.833
chr9:56338297-56339891	146.008	1.49926	0.271533	5.52145	3.36221e-08	1.77379e-06	71.5761	80.5341	205.522	226.398
chrX:119134451-119138317	592.062	0.743208	0.134601	5.52156	3.36003e-08	1.77379e-06	437.56	447.6	768.517	714.57
chr7:22038121-22044125	2007	0.426404	0.0772832	5.51743	3.44e-08	1.81225e-06	1715.13	1709.87	2342.57	2260.45
chr20:25815545-25818943	1184.6	0.634985	0.115098	5.51692	3.45002e-08	1.81586e-06	818.398	1032.53	1402.62	1484.86
chr19:54295297-54297417	612.867	0.761867	0.1382	5.5128	3.53174e-08	1.85718e-06	436.209	472.184	718.841	824.232
chr2:105216021-105219459	598.904	0.761358	0.138114	5.51254	3.53691e-08	1.8582e-06	409.199	477.271	744.166	764.979
chr22:43290910-43292498	135.915	1.55387	0.281951	5.51113	3.56533e-08	1.87142e-06	74.2771	64.4273	210.393	194.561
chr1:6841721-6862050	4128.34	0.334757	0.0608278	5.50336	3.72615e-08	1.95403e-06	3534.24	3763.91	4621.82	4593.41
chr4:118669059-118671303	1191.35	-0.579059	0.105222	-5.5032	3.7295e-08	1.95403e-06	1381.55	1472.5	886.376	1024.98
chr2:63108283-63109835	129.955	1.68879	0.307054	5.5	3.79797e-08	1.9881e-06	71.5761	52.5591	225.003	170.683
chr3:33613281-33617015	1600.09	0.463621	0.0843155	5.49865	3.82717e-08	2.00157e-06	1347.79	1342.8	1842.88	1866.9
chr19:8749714-8755483	2682.44	0.421695	0.0767021	5.49783	3.84488e-08	2.009e-06	2186.45	2394.83	3202.64	2945.83
chr22:28682703-28686457	361.579	0.945525	0.172057	5.49543	3.89749e-08	2.03465e-06	257.944	237.364	454.877	496.131
chr3:92124673-92127010	633.587	0.711493	0.129531	5.49286	3.95468e-08	2.06263e-06	492.93	468.793	799.687	772.938
chr13:32167343-32171506	2177.06	-0.414923	0.0755875	-5.4893	4.03528e-08	2.10277e-06	2484.91	2491.47	1813.66	1918.2
chr3:51689542-51693740	695.497	0.676442	0.123239	5.48887	4.04513e-08	2.10409e-06	526.692	543.393	862.025	849.878
chrX:46448122-46449868	220.333	1.21505	0.221362	5.48896	4.04297e-08	2.10409e-06	122.895	141.571	293.186	323.679
chr18:55997817-55999163	76.9877	2.182	0.397737	5.48604	4.11036e-08	2.13609e-06	21.6079	33.0614	138.314	114.968
chr9:103996553-103998455	435.356	-0.904674	0.164928	-5.48528	4.12815e-08	2.1434e-06	611.773	524.743	278.575	326.332
chr17:71719473-71724669	2692.18	-0.40235	0.0733614	-5.48448	4.14677e-08	2.15113e-06	3056.16	3073.01	2432.18	2207.38
chr16:44979167-44989874	6002.18	-0.294334	0.0536772	-5.48341	4.17203e-08	2.16228e-06	6463.46	6758.08	5318.26	5468.94
chr10:83388056-83389973	215.169	1.25261	0.228533	5.48108	4.22731e-08	2.18896e-06	143.152	112.748	315.589	289.189
chr20:4764881-4766547	117.539	1.75195	0.319673	5.48043	4.24304e-08	2.19514e-06	64.8236	44.0818	196.756	164.493
chr18:35418816-35422109	575.775	0.764995	0.13966	5.47754	4.31268e-08	2.22916e-06	398.395	452.687	748.063	703.957
chr15:81193679-81197002	1392.14	-0.516355	0.0942729	-5.47723	4.3203e-08	2.2311e-06	1720.53	1558.97	1165.93	1123.15
chr23:9825906-9827087	109.788	1.80212	0.329079	5.47626	4.3442e-08	2.24143e-06	55.3702	43.2341	192.86	147.69
chr27:44361000-44362867	468.099	0.854772	0.156165	5.4735	4.41224e-08	2.27449e-06	364.633	304.334	612.671	590.758
chr2:71823238-71828968	1808.61	0.44267	0.0808842	5.47289	4.42764e-08	2.28039e-06	1504.45	1560.67	2060.09	2109.22
chr22:30581178-30587367	1267.45	0.524659	0.0958897	5.47149	4.46279e-08	2.29644e-06	1007.47	1069.83	1458.14	1534.38
chr23:7137288-7138460	67.2052	2.27049	0.415089	5.46988	4.50333e-08	2.31524e-06	24.3089	22.0409	111.041	111.43
chrX:135665913-135669217	1756.18	-0.45179	0.0826115	-5.46885	4.52975e-08	2.32674e-06	2012.23	2045.57	1439.63	1527.3
chr21:5483455-5484946	208.154	1.27933	0.234005	5.4671	4.57456e-08	2.34766e-06	103.988	137.332	284.42	306.876
chr23:2866722-2869015	596.303	0.726641	0.132929	5.46638	4.59318e-08	2.35512e-06	459.167	439.971	752.933	733.142
chr1:98505388-98509762	2198.03	0.464172	0.0849282	5.46547	4.61693e-08	2.36519e-06	1725.93	1964.18	2450.68	2651.34
chr18:56387871-56389217	148.138	1.60187	0.293113	5.46503	4.6284e-08	2.36896e-06	63.4731	82.2296	262.017	184.833
chr26:43479239-43481492	354.968	0.944899	0.172956	5.46323	4.67544e-08	2.39091e-06	228.233	256.014	460.721	474.906
chr19:35705531-35707964	260.933	1.13244	0.207314	5.46243	4.69651e-08	2.39955e-06	148.554	177.175	335.07	382.932
chr3:20824544-20829346	1393.06	0.504598	0.0924117	5.46033	4.75254e-08	2.42603e-06	1196.54	1109.68	1662.69	1603.36
chrX:112638846-112640299	303.451	1.0151	0.186026	5.45675	4.84928e-08	2.47322e-06	212.027	190.739	404.227	406.81
chr11:73667242-73668349	107.869	1.95677	0.358803	5.45359	4.9364e-08	2.51542e-06	27.0098	59.3409	175.327	169.799
chr8:96617111-96618976	156.006	1.43646	0.263483	5.45183	4.98545e-08	2.53817e-06	86.4315	82.2296	210.393	244.97
chr9:90933370-90934654	203.962	1.264	0.232258	5.44223	5.26175e-08	2.67648e-06	105.338	133.093	287.342	290.073
chr7:90586084-90587963	285.071	1.03438	0.190138	5.44017	5.32299e-08	2.70524e-06	190.419	183.957	384.746	381.163
chr20:58864348-58870125	342.709	1.02108	0.187746	5.43863	5.36916e-08	2.72149e-06	228.233	224.648	403.253	514.703
chr24:20506264-20508334	362.343	0.931837	0.171331	5.43882	5.36338e-08	2.72149e-06	259.295	239.907	493.838	456.334
chr25:37164926-37178968	3615.81	0.354523	0.0651844	5.43877	5.36483e-08	2.72149e-06	3139.89	3206.95	3905.9	4210.48
chrX:30444150-30447090	549.576	0.810724	0.149074	5.43839	5.37638e-08	2.72276e-06	376.787	419.625	760.725	641.167
chr4:70906746-70911830	1296.43	0.505639	0.0930135	5.43618	5.44338e-08	2.75426e-06	1077.69	1065.59	1548.72	1493.7
chr3:119454591-119458110	1247.16	0.537404	0.0988804	5.43489	5.48297e-08	2.77186e-06	1010.17	1024.05	1553.59	1400.84
chr18:19970781-19977020	4615.61	0.332366	0.0611627	5.43412	5.50661e-08	2.78137e-06	3982.6	4186.93	4973.45	5319.48
chr20:48899685-48900852	45.5349	3.40155	0.626	5.43378	5.51723e-08	2.78429e-06	13.5049	3.39091	104.222	61.0214
chr5:20208362-20209616	271.714	1.06149	0.195362	5.43346	5.52726e-08	2.78691e-06	172.863	178.871	376.953	358.169
chr17:55175479-55177475	180.967	1.31551	0.242216	5.43115	5.59912e-08	2.82067e-06	110.74	97.4887	250.328	265.311
chr7:33476891-33477580	51.0012	2.83297	0.521687	5.4304	5.62284e-08	2.83015e-06	17.5564	8.47728	98.378	79.5932
chr14:10437944-10441443	1326.56	0.498348	0.0918434	5.42606	5.7612e-08	2.89725e-06	1100.65	1098.65	1576.97	1529.96
chr19:32774424-32775878	100.095	1.89701	0.349786	5.42333	5.85002e-08	2.93936e-06	54.0197	32.2136	155.846	158.302
chr19:55528621-55531677	584.701	0.813112	0.149943	5.42279	5.86761e-08	2.94562e-06	448.363	401.823	665.269	823.347
chr5:78153093-78155263	284.128	1.11874	0.206343	5.42176	5.90161e-08	2.96011e-06	149.905	205.998	400.33	380.279
chr2:91802629-91804543	651.297	0.698874	0.128921	5.42094	5.92873e-08	2.96854e-06	517.239	477.271	819.168	791.51
chr9:97747362-97749390	472.105	0.813661	0.150095	5.42096	5.92787e-08	2.96854e-06	349.778	335.7	578.58	624.364
chr14:1416771-1420451	386.98	0.90312	0.166646	5.4194	5.97991e-08	2.99157e-06	271.449	267.882	532.8	475.79
chr9:90005635-90011927	483.752	0.813788	0.150184	5.4186	6.00672e-08	3.00237e-06	326.819	373	621.437	613.752
chr16:34905763-34907026	109.761	1.76105	0.325027	5.41818	6.02095e-08	3.00687e-06	56.7207	44.0818	187.016	151.227
chr10:100586241-100588896	1068.89	0.561797	0.103714	5.4168	6.06742e-08	3.02745e-06	853.511	872.312	1326.64	1223.08
chr5:68841041-68845101	1209.16	0.527304	0.0973613	5.41596	6.09617e-08	3.03917e-06	973.705	1006.25	1471.77	1384.92
chr17:42251254-42259302	3836.15	0.356505	0.0658332	5.41527	6.11965e-08	3.04823e-06	3195.26	3527.39	4306.23	4315.72
chr21:25410613-25415400	1614.53	-0.465791	0.0860609	-5.41234	6.22052e-08	3.0958e-06	1937.96	1809.9	1360.73	1349.55
chr27:25154184-25156080	453.296	-0.824136	0.15229	-5.41161	6.24599e-08	3.10579e-06	569.908	588.323	341.888	313.067
chr29:17402341-17404686	742.007	-0.66697	0.123286	-5.40993	6.30505e-08	3.13245e-06	958.85	863.834	558.125	587.221
chr23:49673384-49678238	1042.1	0.561179	0.103736	5.40969	6.31335e-08	3.13387e-06	873.769	812.123	1239.95	1242.54
chr11:79670669-79674253	1312.04	0.523915	0.0968596	5.40901	6.3374e-08	3.1431e-06	1014.22	1135.11	1537.03	1561.8
chr12:75911019-75913632	293.972	1.086	0.20088	5.4062	6.43757e-08	3.19003e-06	160.709	213.627	387.668	413.885
chr10:73592905-73594460	158.251	1.3962	0.258289	5.40559	6.45948e-08	3.19814e-06	85.081	89.0114	220.133	238.78
chr5:56087809-56092308	1867.88	0.457394	0.0846268	5.40484	6.48667e-08	3.20884e-06	1593.58	1556.43	2051.33	2270.17
chr5:117024471-117027692	3132.26	-0.375302	0.0694465	-5.40419	6.51015e-08	3.21769e-06	3476.17	3596.06	2846.14	2610.66
chr4:65861445-65865368	607.594	-0.716058	0.13252	-5.40339	6.53921e-08	3.22928e-06	785.987	725.655	459.747	458.987
chr23:15022887-15031312	4881.4	-0.307236	0.0568635	-5.40304	6.55215e-08	3.2329e-06	5312.84	5483.95	4276.04	4452.8
chr16:71361465-71364974	561.146	0.739172	0.136827	5.40225	6.5809e-08	3.2443e-06	415.952	424.712	686.698	717.223
chr1:52594745-52596135	115.674	1.8503	0.342532	5.40184	6.59618e-08	3.24905e-06	35.1128	63.5796	207.47	156.533
chr19:60936680-60939583	722.495	0.673712	0.124741	5.4009	6.63091e-08	3.26337e-06	523.991	587.475	874.688	903.825
chr22:247050-249017	166.985	1.37358	0.254492	5.39734	6.7638e-08	3.32593e-06	101.287	85.6205	229.873	251.161
chr9:12195842-12199550	1194.21	0.557063	0.103222	5.39677	6.78516e-08	3.33359e-06	904.83	1024.9	1377.29	1469.82
chr5:115953215-115955495	852.847	-0.63107	0.116954	-5.39588	6.81888e-08	3.3473e-06	1100.65	974.039	676.958	659.739
chr19:53980414-53981447	91.9537	1.88923	0.350145	5.39557	6.83045e-08	3.35012e-06	39.1643	38.9955	158.769	130.887
chr18:49134042-49137579	289.077	1.06019	0.196593	5.39283	6.93578e-08	3.39889e-06	201.223	174.632	417.863	362.591
chr7:26432489-26433558	300.988	1.00612	0.186746	5.38762	7.13983e-08	3.49591e-06	194.471	205.15	417.863	386.469
chr11:610724-611844	106.074	1.99906	0.371102	5.38682	7.17153e-08	3.50844e-06	60.7722	26.2796	166.561	170.683
chr5:97123729-97129482	3469.82	0.421762	0.0783351	5.38408	7.28169e-08	3.55931e-06	2711.79	3212.89	3887.39	4067.21
chr4:76872654-76874611	136.252	1.7889	0.332289	5.38357	7.30246e-08	3.56644e-06	81.0295	43.2341	247.406	173.336
chr25:30595322-30600495	1128.39	0.537222	0.0997951	5.38325	7.31542e-08	3.56974e-06	934.541	907.916	1300.34	1370.77
chr2:9769862-9771799	395.011	0.990227	0.184122	5.3781	7.52777e-08	3.67025e-06	311.964	220.409	525.008	522.662
chr19:44519795-44527576	1530.29	0.468455	0.0871094	5.37778	7.54098e-08	3.67358e-06	1297.82	1270.74	1816.58	1736.02
chrX:7986958-7988480	150.692	1.41694	0.263534	5.3767	7.58654e-08	3.69265e-06	81.0295	83.0773	221.107	217.555
chr3:19302319-19304566	336.614	0.967986	0.18011	5.37441	7.68336e-08	3.73662e-06	207.976	245.841	454.877	437.763
chr21:47370762-47371882	96.8745	1.95502	0.363925	5.37205	7.78479e-08	3.78275e-06	27.0098	50.8637	145.132	164.493
chr7:4893383-4898211	1274.19	0.513568	0.0956355	5.37006	7.87111e-08	3.82147e-06	1072.29	1028.29	1545.8	1450.36
chr6:4305798-4308063	571.079	0.74511	0.13876	5.36979	7.88272e-08	3.82388e-06	448.363	406.909	690.594	738.448
chr11:58716702-58719383	773.185	0.704556	0.131211	5.36963	7.88977e-08	3.82408e-06	533.444	639.187	1019.82	900.287
chr1:137176220-137177382	69.9516	2.28526	0.425627	5.36916	7.91042e-08	3.82984e-06	22.9584	24.5841	92.5338	139.73
chr4:74935585-74937953	278.238	1.07957	0.201073	5.36906	7.91496e-08	3.82984e-06	199.873	159.373	386.694	367.013
chr5:107497441-107500877	1075.67	0.561874	0.1047	5.36649	8.02825e-08	3.8814e-06	918.335	822.296	1277.94	1284.1
chr25:26587270-26589915	484.679	0.82661	0.154051	5.3658	8.05899e-08	3.89299e-06	316.015	380.63	609.749	632.324
chr18:12566566-12569428	778.649	0.625003	0.116499	5.36488	8.10043e-08	3.90973e-06	613.124	612.059	945.793	943.621
chr9:8665434-8666261	71.6605	2.13281	0.397588	5.36438	8.12289e-08	3.91729e-06	27.0098	26.2796	113.963	119.39
chr29:29606813-29611236	792.297	0.675235	0.12594	5.36156	8.25051e-08	3.97551e-06	552.351	664.618	955.533	996.684
chr5:70147856-70149825	306.082	1.05866	0.197464	5.36129	8.26278e-08	3.97809e-06	220.13	178.871	376.953	448.375
chr22:52834248-52835442	247.008	1.16663	0.217693	5.35907	8.36505e-08	4.02396e-06	129.647	172.936	327.277	358.169
chr2:47022734-47027981	1496.08	0.472638	0.0882062	5.35833	8.39927e-08	4.03393e-06	1268.11	1239.38	1694.83	1782
chr6:86456391-86458318	95.4723	1.91065	0.356576	5.35832	8.39979e-08	4.03393e-06	29.7108	49.1682	159.743	143.268
chr9:101885052-101888914	1310.66	-0.571581	0.106677	-5.35805	8.41229e-08	4.03657e-06	1716.48	1420.79	1072.42	1032.94
chr12:12286594-12288770	200.111	1.22419	0.228548	5.35636	8.49163e-08	4.07125e-06	124.245	116.139	271.757	288.304
chr1:79329479-79332856	1187.15	0.629146	0.11748	5.35536	8.53852e-08	4.09032e-06	825.151	1034.23	1527.29	1361.93
chr13:68396350-68399336	935.191	-0.573688	0.107171	-5.35302	8.64998e-08	4.14027e-06	1116.86	1120.7	737.348	765.863
chr16:60150240-60153069	882.699	0.617358	0.115517	5.34429	9.07728e-08	4.34119e-06	696.854	696.832	1004.24	1132.88
chr7:5020524-5022815	569.698	0.73497	0.137586	5.34188	9.19877e-08	4.39564e-06	420.003	434.884	682.802	741.101
chr18:52366877-52368347	214.761	1.18861	0.222519	5.34161	9.21227e-08	4.39844e-06	120.194	140.723	300.978	297.148
chr6:22513509-22514979	206.567	1.22317	0.229103	5.33894	9.34908e-08	4.46006e-06	126.946	121.225	265.913	312.182
chr10:57995078-57997390	233.959	1.12587	0.210951	5.33711	9.4438e-08	4.50152e-06	141.802	151.743	329.225	313.067
chr14:39729147-39730300	193.634	1.34054	0.251181	5.33694	9.45269e-08	4.50203e-06	132.348	89.0114	283.446	269.732
chrX:138919795-138922532	698.866	0.658796	0.123445	5.33676	9.46231e-08	4.50288e-06	555.052	529.83	866.896	843.688
chr12:27627060-27628409	146.785	1.44613	0.271088	5.33453	9.57917e-08	4.55473e-06	86.4315	72.0568	208.445	220.208
chr13:66036388-66044419	1143.46	1.28923	0.241918	5.32922	9.86355e-08	4.68608e-06	553.702	772.28	1695.8	1552.07
chr13:4372400-4378210	1026.99	-0.546003	0.10246	-5.32894	9.87877e-08	4.68944e-06	1203.29	1234.29	833.778	836.613
chr7:23135607-23137516	147.45	1.43929	0.270145	5.32784	9.93903e-08	4.71416e-06	71.5761	86.4682	213.315	218.439
chr4:8646473-8647894	271.216	1.0381	0.194874	5.32705	9.98226e-08	4.73077e-06	180.966	174.632	361.369	367.897
chr19:18837191-18841061	666.255	0.6997	0.131403	5.32484	1.01041e-07	4.78459e-06	530.743	486.596	779.232	868.45
chr5:24874161-24879330	708.57	0.67664	0.127105	5.32348	1.01801e-07	4.81661e-06	513.187	575.607	842.545	902.94
chr22:50057866-50063442	403.428	0.902899	0.169637	5.32255	1.02322e-07	4.83728e-06	298.459	265.339	482.15	567.765
chrX:14778288-14780728	334.345	0.943966	0.177387	5.32149	1.02919e-07	4.86149e-06	237.687	220.409	453.903	425.381
chr19:36722937-36724098	100.158	1.80429	0.339261	5.31831	1.04737e-07	4.94333e-06	36.4633	51.7114	147.08	165.377
chr19:44828610-44831434	478.808	0.821768	0.154563	5.31673	1.05648e-07	4.98226e-06	313.314	376.391	602.931	622.596
chr15:43825105-43830587	1806.45	-0.450598	0.084757	-5.31635	1.05869e-07	4.98858e-06	2187.8	1987.92	1506.84	1543.22
chr14:14670819-14673936	2182.73	-0.402412	0.075733	-5.31356	1.07502e-07	5.06139e-06	2433.59	2535.55	1840.94	1920.85
chr9:101120712-101122852	1034.08	-0.551035	0.103775	-5.30989	1.09689e-07	5.16012e-06	1187.08	1269.9	844.493	834.844
chr9:39237759-39245285	1462.65	0.480091	0.0904238	5.30934	1.10023e-07	5.1716e-06	1245.15	1199.53	1645.15	1760.78
chr10:29824254-29826559	554.341	-0.830285	0.156423	-5.30793	1.10878e-07	5.20395e-06	632.03	785.843	365.265	434.225
chr16:36809613-36813923	875.309	0.59231	0.11159	5.30791	1.10892e-07	5.20395e-06	688.751	707.005	1025.66	1079.81
chr7:81581874-81584294	448.582	0.822895	0.155039	5.30765	1.11046e-07	5.20695e-06	336.273	312.811	547.41	597.833
chr12:22644455-22646713	231.516	1.14176	0.215199	5.30563	1.12287e-07	5.26084e-06	136.4	151.743	300.978	336.944
chr29:50694372-50696410	730.735	0.651845	0.122867	5.30531	1.12483e-07	5.26577e-06	594.217	544.241	910.727	873.756
chr11:75572975-75578919	1259.27	0.496264	0.0935757	5.30334	1.13703e-07	5.31857e-06	1047.98	1041.86	1465.93	1481.32
chr13:48249860-48254738	564.045	0.765554	0.144383	5.30223	1.14396e-07	5.34663e-06	455.116	383.173	684.75	733.142
chr2:58962470-58967294	859.982	-0.603913	0.113945	-5.30006	1.15763e-07	5.40614e-06	1050.68	1024.9	650.659	713.686
chr19:7712913-7714998	135.525	1.49777	0.282763	5.2969	1.17787e-07	5.49616e-06	74.2771	67.8182	214.289	185.717
chr27:9672723-9673937	122.089	1.56977	0.296411	5.29592	1.18418e-07	5.52117e-06	62.1226	61.0364	172.405	192.792
chr5:38586332-38588757	316.301	1.05298	0.199019	5.29086	1.21745e-07	5.67166e-06	234.986	178.871	390.59	460.756
chr11:92378144-92381522	826.09	0.600103	0.11345	5.2896	1.22584e-07	5.70616e-06	653.638	659.532	1004.24	986.955
chr3:49580244-49581522	282.741	1.07119	0.202526	5.28918	1.22867e-07	5.71473e-06	185.017	179.718	426.629	339.598
chr21:21704251-21705875	161.578	1.37912	0.260765	5.28874	1.23162e-07	5.72378e-06	81.0295	97.4887	249.354	218.439
chr12:19825909-19828445	559.068	-0.840019	0.15903	-5.28213	1.27692e-07	5.92476e-06	796.79	639.187	441.24	359.054
chr26:11043407-11044557	183.527	1.2744	0.241263	5.28221	1.27632e-07	5.92476e-06	108.039	106.814	241.562	277.692
chr23:25714694-25716356	233.423	1.1132	0.210906	5.27818	1.30472e-07	6.04888e-06	145.853	149.2	308.771	329.87
chr10:13628311-13635087	732.821	0.639702	0.12127	5.27501	1.32749e-07	6.1495e-06	564.506	580.693	918.52	867.566
chr22:48565237-48568373	954.513	-0.557203	0.105695	-5.27179	1.35097e-07	6.25321e-06	1139.82	1133.41	776.31	768.516
chr23:24745624-24751368	1345.96	0.551919	0.104702	5.27135	1.35423e-07	6.26331e-06	1019.62	1160.54	1494.18	1709.48
chrX:81992795-81997123	489.402	0.779266	0.147844	5.27085	1.35793e-07	6.27534e-06	360.581	360.284	590.268	646.474
chr6:114487188-114490235	544.385	0.761967	0.144707	5.2656	1.39729e-07	6.45208e-06	421.354	387.412	727.608	641.167
chr23:30958975-30967627	2731.21	-0.365396	0.0694176	-5.26374	1.41152e-07	6.51257e-06	3154.75	2998.41	2359.12	2412.56
chr14:45013414-45016611	1133.69	0.620709	0.117926	5.26355	1.41298e-07	6.51409e-06	802.192	980.821	1282.81	1468.94
chr10:38332846-38334850	335.631	0.970848	0.184533	5.26111	1.43191e-07	6.59608e-06	239.037	215.323	483.124	405.041
chr16:79999386-80000717	115.284	1.64861	0.313482	5.25902	1.44825e-07	6.66599e-06	45.9167	64.4273	179.223	171.568
chrX:138667453-138670508	461.963	0.799046	0.15196	5.25828	1.4541e-07	6.68757e-06	329.52	344.177	611.697	562.458
chr19:54320278-54321642	207.612	1.18722	0.225903	5.25545	1.47661e-07	6.7857e-06	124.245	128.855	305.849	271.501
chr5:22658359-22662135	539.637	0.748703	0.142571	5.25142	1.50928e-07	6.92708e-06	425.405	381.477	695.464	656.202
chr7:21090892-21094025	989.83	-0.54955	0.104649	-5.25136	1.50978e-07	6.92708e-06	1158.72	1192.75	817.219	790.626
chr15:32831232-32837174	2658.3	0.360927	0.0687369	5.25084	1.51404e-07	6.94107e-06	2326.9	2327.86	3027.32	2951.14
chr19:18001036-18005427	744.099	0.648473	0.123671	5.24352	1.57544e-07	7.2168e-06	610.423	551.023	876.636	938.315
chr4:102871439-102873227	212.246	1.17996	0.225254	5.23837	1.62003e-07	7.40996e-06	122.895	136.484	275.653	313.951
chr5:110649976-110655307	4210.48	-0.317439	0.0605991	-5.23835	1.62018e-07	7.40996e-06	4574.12	4767.62	3658.49	3841.7
chr5:112070200-112071546	123.812	1.62441	0.310209	5.23648	1.63668e-07	7.4795e-06	68.8751	53.4068	160.717	212.248
chr5:70689982-70691864	201.193	1.21145	0.231357	5.23626	1.63862e-07	7.48243e-06	133.699	110.205	280.523	280.345
chr11:106114293-106115573	170.357	1.30432	0.249268	5.2326	1.67144e-07	7.62625e-06	90.483	105.118	243.51	242.317
chr18:61533902-61535351	404.525	-0.861918	0.164731	-5.23227	1.67444e-07	7.63389e-06	506.435	536.612	309.745	265.311
chr23:7280302-7287072	4709.74	-0.289757	0.055391	-5.23113	1.68477e-07	7.67492e-06	5193.99	5168.6	4242.92	4233.47
chr5:43233847-43235913	233.228	1.1751	0.224744	5.2286	1.70802e-07	7.77466e-06	140.451	145.809	280.523	366.129
chr8:79254234-79255969	192.742	1.24771	0.23876	5.22581	1.73393e-07	7.88635e-06	99.9364	127.159	268.835	275.039
chr15:32284823-32287942	1819.15	0.428336	0.0820183	5.22245	1.76574e-07	8.0247e-06	1512.55	1587.79	2039.64	2136.63
chr21:14946350-14950370	662.922	0.688985	0.132031	5.21837	1.80501e-07	8.19669e-06	472.672	540.002	848.389	790.626
chr21:61178509-61182819	2008.97	-0.448589	0.0859776	-5.21751	1.81343e-07	8.22844e-06	2438.99	2202.4	1616.91	1777.58
chr15:50637110-50638629	255.962	1.05811	0.202825	5.21687	1.8197e-07	8.25039e-06	156.657	174.632	356.499	336.06
chr2:130990310-130992846	626.003	0.719343	0.137906	5.2162	1.82634e-07	8.2675e-06	437.56	506.093	820.142	740.217
chr4:107638196-107641202	570.425	0.769372	0.147495	5.21627	1.82564e-07	8.2675e-06	471.322	375.543	724.686	710.148
chr26:35030805-35033045	366.727	0.878929	0.16851	5.21588	1.8295e-07	8.27529e-06	267.397	250.08	466.565	482.865
chr10:82141127-82142922	347.958	-0.914097	0.175335	-5.21343	1.85381e-07	8.37866e-06	457.817	451.839	223.055	259.12
chr3:119798154-119799270	121.649	1.54535	0.296555	5.21099	1.87836e-07	8.48295e-06	66.1741	58.4932	175.327	186.602
chr21:58688280-58689508	100.502	1.96324	0.376903	5.20888	1.89983e-07	8.57322e-06	56.7207	27.1273	180.197	137.962
chr5:27673997-27689429	4232.85	0.307703	0.0590803	5.20821	1.90672e-07	8.59758e-06	3707.1	3856.31	4628.64	4739.33
chr3:20629883-20636618	3212.45	0.333216	0.0639832	5.20787	1.91024e-07	8.60671e-06	2838.73	2847.52	3536.74	3626.8
chr9:29223218-29224560	184.026	1.24611	0.239293	5.20744	1.91463e-07	8.61973e-06	110.74	107.661	272.731	244.97
chr6:22421056-22428442	1420.43	0.464178	0.0891427	5.20714	1.91775e-07	8.62704e-06	1181.68	1205.47	1626.65	1667.92
chr17:7765673-7771012	2204.76	0.401308	0.0770971	5.20523	1.93755e-07	8.70251e-06	1821.81	1974.36	2532.5	2490.38
chr18:42921149-42923359	717.442	0.637222	0.122418	5.2053	1.93683e-07	8.70251e-06	545.599	576.455	857.155	890.559
chr2:94120516-94123453	651.821	0.725413	0.139416	5.20322	1.95862e-07	8.7903e-06	434.859	544.241	817.219	810.966
chrX:58695327-58699409	1560.95	0.479684	0.092197	5.20282	1.96286e-07	8.80247e-06	1218.14	1385.19	1801	1839.49
chr6:88669692-88672309	1128.04	0.552943	0.106281	5.20266	1.96454e-07	8.8031e-06	867.016	959.628	1274.04	1411.45
chr13:34317008-34328032	4116.45	-0.301792	0.0580207	-5.20145	1.97736e-07	8.84681e-06	4559.26	4531.95	3696.48	3678.09
chr22:59780705-59782027	267.461	1.06505	0.204757	5.20154	1.97642e-07	8.84681e-06	176.914	169.546	326.303	397.082
chr24:61742105-61745221	2829.87	-0.35064	0.0674274	-5.20026	1.9901e-07	8.89691e-06	3160.15	3183.22	2533.48	2442.63
chr19:46962934-46964469	115.335	1.61921	0.311398	5.19981	1.99496e-07	8.9048e-06	59.4217	54.2546	154.872	192.792
chr24:49214503-49218549	560.198	0.722707	0.138985	5.19989	1.99404e-07	8.9048e-06	421.354	423.864	730.53	665.045
chr19:7930818-7931594	110.68	1.67678	0.322745	5.19539	2.04292e-07	9.11182e-06	56.7207	49.1682	190.912	145.921
chr21:24702265-24706742	1153.85	-0.530705	0.102174	-5.19412	2.05695e-07	9.16728e-06	1293.77	1431.81	921.442	968.384
chr5:106827513-106830820	1914.61	-0.407979	0.078623	-5.18905	2.11375e-07	9.41314e-06	2171.59	2194.77	1676.32	1615.74
chr15:75766129-75768079	602.277	0.703818	0.135659	5.18812	2.12422e-07	9.45246e-06	429.457	484.9	760.725	734.026
chr10:65125270-65127236	445.356	0.82578	0.159272	5.18471	2.16349e-07	9.61978e-06	295.758	345.025	545.462	595.18
chr12:67998493-68001204	964.364	0.575868	0.111104	5.18313	2.1819e-07	9.68667e-06	722.513	823.144	1163	1148.79
chr18:16825394-16832337	1738.35	0.44548	0.085946	5.18325	2.18047e-07	9.68667e-06	1463.93	1479.28	2099.06	1911.12
chr20:8655873-8657393	146.415	1.46093	0.282064	5.17941	2.22585e-07	9.87417e-06	93.184	64.4273	221.107	206.942
chr7:42949435-42950550	189.747	1.21729	0.235034	5.1792	2.22835e-07	9.87767e-06	117.493	111.052	276.627	253.814
chr2:109649895-109652906	728.936	0.668424	0.129076	5.17853	2.2364e-07	9.90569e-06	517.239	606.125	862.025	930.356
chr13:24875337-24878001	1390.37	0.494037	0.0954038	5.17837	2.2383e-07	9.9065e-06	1089.85	1215.64	1668.53	1587.44
chr29:41202300-41203897	103.049	1.82356	0.352205	5.17754	2.24832e-07	9.9432e-06	59.4217	33.0614	149.028	170.683
chr25:22082681-22089062	3816.6	-0.313193	0.0604954	-5.17715	2.25304e-07	9.95642e-06	4197.33	4260.68	3348.75	3459.65
chr1:127616921-127620189	958.864	0.628507	0.121485	5.17352	2.2972e-07	1.01438e-05	688.751	814.666	1085.08	1246.96
chr27:26157579-26159932	339.016	1.09367	0.211466	5.17184	2.31797e-07	1.02277e-05	247.14	187.348	538.644	382.932
chr19:46021572-46024715	406.464	0.855961	0.165602	5.16878	2.3563e-07	1.03888e-05	264.696	311.964	541.566	507.628
chr18:52413637-52418160	2257.52	0.387183	0.074911	5.16857	2.35895e-07	1.03925e-05	1904.19	2005.72	2599.71	2520.45
chr18:36421375-36426481	1594.29	0.438551	0.0848736	5.16711	2.3774e-07	1.04658e-05	1346.44	1360.6	1863.34	1806.77
chr1:152328246-152333412	4127.22	-0.304838	0.059	-5.16674	2.38217e-07	1.04771e-05	4525.5	4597.23	3630.25	3755.91
chr13:62149039-62153756	2175.92	0.384819	0.0744816	5.16662	2.3836e-07	1.04771e-05	1858.28	1915.02	2469.19	2461.2
chr18:6148778-6151326	208.425	1.17207	0.226892	5.16575	2.39483e-07	1.05184e-05	140.451	116.986	284.42	291.842
chr7:17759543-17761728	495.344	0.756549	0.146468	5.16527	2.40092e-07	1.05371e-05	386.241	351.807	623.386	619.942
chr24:57160394-57169284	4155.55	0.365649	0.070817	5.16329	2.42645e-07	1.06411e-05	3380.28	3874.96	4800.07	4566.88
chr2:95801853-95804571	563.466	0.701027	0.135827	5.16117	2.45409e-07	1.07541e-05	426.756	431.493	692.542	703.073
chr11:94692652-94695881	621.834	1.45376	0.281733	5.16006	2.46867e-07	1.08098e-05	272.799	390.802	827.934	995.799
chr4:67651203-67653533	479.771	0.795554	0.154213	5.1588	2.48544e-07	1.08749e-05	321.417	378.087	586.372	633.208
chr16:60018929-60022316	955.826	0.549992	0.106637	5.15761	2.50125e-07	1.09358e-05	772.482	779.062	1112.35	1159.41
chrX:76891548-76894998	598.466	0.726825	0.140951	5.15658	2.51501e-07	1.09876e-05	413.251	485.748	781.18	713.686
chr2:36279634-36282772	620.837	0.674982	0.130904	5.15631	2.51861e-07	1.09932e-05	495.631	462.012	760.725	764.979
chr5:115519923-115525528	2920.23	0.346283	0.0671588	5.15618	2.52036e-07	1.09932e-05	2514.62	2625.41	3296.15	3244.75
chr8:86842304-86843595	192.914	1.40175	0.271865	5.15606	2.52202e-07	1.09932e-05	136.4	77.9909	299.03	258.236
chr2:104923385-104924491	169.955	1.30723	0.253585	5.155	2.53635e-07	1.10473e-05	87.782	106.814	256.172	229.051
chr12:27852827-27857779	1370.99	-0.503748	0.0977563	-5.1531	2.5622e-07	1.11515e-05	1538.21	1675.11	1196.12	1074.51
chr14:46354911-46357267	212.276	1.13802	0.220861	5.15263	2.56856e-07	1.11627e-05	137.75	128.007	294.16	289.189
chr29:41862371-41863569	62.7765	2.24684	0.436057	5.15263	2.56865e-07	1.11627e-05	25.6594	18.65	94.4819	112.315
chr13:33331798-33336813	488.508	0.766161	0.148719	5.15172	2.58106e-07	1.12082e-05	349.778	373	588.32	642.936
chr13:12690067-12697147	1150.63	0.534052	0.103671	5.15142	2.58521e-07	1.12177e-05	892.675	985.059	1307.16	1417.64
chr18:36375491-36377025	211.289	1.19898	0.232782	5.15066	2.59578e-07	1.12551e-05	140.451	116.986	322.407	265.311
chr2:7633798-7635263	180.806	1.28679	0.249868	5.14989	2.60639e-07	1.12926e-05	120.194	91.5546	243.51	267.964
chr26:33558999-33560910	172.24	1.26885	0.246432	5.14889	2.62039e-07	1.13447e-05	103.988	98.3364	252.276	234.358
chr25:33145556-33150432	1300.4	-0.476568	0.0926335	-5.14466	2.68009e-07	1.15944e-05	1499.05	1526.76	1107.48	1068.32
chr25:19764249-19767550	471.733	0.771098	0.149893	5.14432	2.68498e-07	1.16069e-05	332.221	363.675	602.931	588.105
chr15:38098946-38104489	1289.59	0.486063	0.0945053	5.14323	2.70055e-07	1.16655e-05	1041.23	1105.44	1532.16	1479.55
chr12:77227855-77231562	1042.1	0.54044	0.105133	5.14054	2.73949e-07	1.18248e-05	815.697	880.789	1201.97	1269.95
chr7:103654516-103657607	384.765	0.920117	0.178998	5.14038	2.74184e-07	1.18261e-05	232.285	297.552	472.409	536.812
chr28:17993392-17994731	115.951	1.60586	0.312582	5.13742	2.78542e-07	1.2005e-05	60.7722	54.2546	195.782	152.996
chr22:51802998-51806989	863.919	0.585393	0.113959	5.13685	2.79377e-07	1.2032e-05	721.163	662.923	1013	1058.59
chr3:15469346-15475848	3223.93	-0.329819	0.0642087	-5.13668	2.79634e-07	1.20341e-05	3530.19	3649.47	2876.34	2839.71
chr1:52670093-52672161	342.414	0.915002	0.178161	5.13583	2.80905e-07	1.20798e-05	241.738	233.125	478.254	416.538
chr7:22194447-22198247	1181.97	0.507692	0.0988582	5.13556	2.81311e-07	1.20882e-05	980.457	972.344	1334.43	1440.64
chr16:36310433-36315178	2793.91	-0.344508	0.067093	-5.13478	2.8247e-07	1.21289e-05	3130.44	3121.33	2484.78	2439.09
chr4:56822978-56828900	2421.56	0.412042	0.080285	5.13224	2.86315e-07	1.22849e-05	1985.22	2167.64	2630.88	2902.5
chr15:51694903-51703068	2645.3	0.384408	0.0749299	5.13023	2.89385e-07	1.24074e-05	2167.54	2416.87	2986.41	3010.39
chr10:76588022-76589547	150.422	1.35414	0.263995	5.12941	2.9065e-07	1.24523e-05	89.1325	80.5341	216.237	215.786
chr28:19677263-19680089	343.077	0.892257	0.173966	5.12893	2.914e-07	1.24752e-05	249.841	231.43	447.084	443.953
chr9:29682928-29685457	659.165	0.706158	0.137745	5.12656	2.95088e-07	1.26237e-05	457.817	541.698	770.466	866.681
chr5:19885300-19892300	2029.45	0.393952	0.0768745	5.12461	2.9816e-07	1.27456e-05	1721.88	1784.47	2319.19	2292.28
chr3:54096758-54097613	203.485	1.21538	0.237225	5.12333	3.00186e-07	1.28227e-05	110.74	133.093	313.641	256.467
chr5:96903142-96905365	342.9	0.88883	0.173531	5.12203	3.02257e-07	1.29016e-05	245.79	235.668	437.344	452.797
chr12:86646401-86650198	1047.59	-0.530757	0.103655	-5.12039	3.04897e-07	1.30046e-05	1260.01	1217.34	825.986	887.022
chr16:77401103-77402259	135.492	1.42253	0.277918	5.11852	3.07938e-07	1.31246e-05	71.5761	75.4478	197.73	197.214
chr29:36328096-36330269	328.719	0.935124	0.182764	5.11657	3.11148e-07	1.32516e-05	203.924	245.841	434.422	430.688
chr13:64646196-64646961	49.9457	2.56462	0.501417	5.11474	3.14166e-07	1.33703e-05	17.5564	11.8682	92.5338	77.8244
chr16:1283795-1286746	698.603	0.652897	0.127677	5.11365	3.15991e-07	1.3423e-05	565.856	522.2	811.375	894.981
chr2:95461759-95464961	498.707	0.756348	0.14791	5.11358	3.16104e-07	1.3423e-05	351.128	389.107	649.685	604.908
chr4:103206785-103211197	2124.58	0.392741	0.0768014	5.11372	3.15877e-07	1.3423e-05	1858.28	1817.53	2344.51	2478
chr4:9621354-9623866	372.539	0.878357	0.171781	5.11323	3.16701e-07	1.34385e-05	245.79	278.055	457.799	508.512
chr29:8460688-8467971	1682.5	-0.435229	0.0851606	-5.11068	3.21003e-07	1.3611e-05	2009.53	1861.61	1427.94	1430.91
chr13:41357062-41358614	156.662	1.33684	0.261586	5.11053	3.21255e-07	1.36116e-05	97.2354	81.3818	217.211	230.82
chr13:78068751-78077997	4683.98	-0.317489	0.0621555	-5.10797	3.25631e-07	1.37869e-05	4977.91	5411.05	4268.24	4078.71
chr11:105328941-105331243	237.921	1.07959	0.211362	5.10778	3.25958e-07	1.37906e-05	163.41	143.266	310.719	334.291
chr28:44273246-44274423	94.4141	1.82343	0.357066	5.1067	3.2784e-07	1.386e-05	31.0613	50.8637	138.314	157.418
chr9:86289320-86293517	2180.24	-0.380656	0.0745755	-5.1043	3.32022e-07	1.40265e-05	2509.21	2424.5	1906.2	1881.05
chr1:70541752-70545657	825.902	0.650826	0.127519	5.10375	3.32992e-07	1.40469e-05	587.464	695.137	943.845	1077.16
chr6:76475367-76478160	226.285	1.18832	0.232827	5.10385	3.32804e-07	1.40469e-05	164.76	113.595	304.874	321.91
chr1:97145624-97148800	535.13	0.722916	0.141758	5.09964	3.40298e-07	1.43446e-05	382.189	423.864	662.347	672.12
chr3:48610008-48611004	91.0925	1.75267	0.343835	5.0974	3.44354e-07	1.4505e-05	41.8653	41.5387	141.236	139.73
chr29:29648776-29650616	304.759	0.945573	0.185525	5.09673	3.45566e-07	1.45453e-05	220.13	197.521	395.46	405.925
chr11:85600097-85601660	111.567	1.66352	0.326493	5.09512	3.48524e-07	1.46592e-05	43.2158	62.7318	151.95	188.371
chr16:63416656-63421185	1579.18	-0.446355	0.087618	-5.09433	3.49982e-07	1.47097e-05	1750.24	1890.43	1353.92	1322.13
chr5:18319119-18319940	43.7604	2.81956	0.553972	5.08972	3.58592e-07	1.50606e-05	14.8554	7.62955	72.079	80.4776
chr16:46750232-46754679	1360.77	0.516861	0.10157	5.08873	3.60477e-07	1.51287e-05	1112.81	1126.63	1474.7	1728.94
chr4:44439693-44441106	108.14	1.59795	0.314173	5.08623	3.65257e-07	1.5307e-05	54.0197	53.4068	169.483	155.649
chr8:101383483-101385853	297.686	0.983492	0.19336	5.08633	3.65056e-07	1.5307e-05	212.027	189.043	364.291	425.381
chr25:15295225-15296927	332.895	-0.92358	0.181669	-5.08386	3.69837e-07	1.54877e-05	469.971	402.671	239.614	219.323
chr9:34152371-34157699	837.977	0.576459	0.113421	5.08248	3.72532e-07	1.55892e-05	691.452	655.293	1002.29	1002.87
chr14:81715121-81718552	2092.34	-0.40066	0.0788503	-5.08128	3.74909e-07	1.56659e-05	2355.26	2406.7	1729.89	1877.51
chr3:102052757-102055469	557.107	0.711426	0.140007	5.08135	3.74766e-07	1.56659e-05	448.363	398.432	684.75	696.883
chr11:98641263-98654366	5358.98	-0.31655	0.0622993	-5.08112	3.75224e-07	1.56677e-05	5813.87	6073.97	4529.29	5018.79
chr5:83670054-83674140	2555.33	-0.353621	0.0696183	-5.07942	3.78587e-07	1.57967e-05	2896.81	2838.19	2227.63	2258.68
chr17:63070927-63075643	673.193	0.6512	0.128236	5.07813	3.81169e-07	1.58814e-05	532.094	516.266	782.154	862.259
chr21:65261315-65270330	1138.93	0.529998	0.104367	5.07824	3.80942e-07	1.58814e-05	975.055	891.809	1281.84	1407.03
chr27:24955706-24964807	1295.1	0.488221	0.0961459	5.07792	3.81587e-07	1.58873e-05	1079.04	1077.46	1443.53	1580.37
chr15:47846991-47849613	527.098	0.72955	0.143705	5.07671	3.84036e-07	1.59777e-05	388.942	403.518	691.568	624.364
chr15:25271148-25273970	1648.1	-0.465238	0.0916453	-5.07651	3.84428e-07	1.59825e-05	1788.05	2032	1352.94	1419.41
chr9:97732483-97734983	400.531	0.852678	0.167971	5.07635	3.8475e-07	1.59843e-05	311.964	261.1	495.786	533.274
chr1:2365570-2372233	3619.48	0.31453	0.0619864	5.07418	3.89172e-07	1.61564e-05	3280.35	3174.74	4061.75	3961.09
chr11:22107094-22110021	616.962	0.661145	0.130392	5.07046	3.96865e-07	1.64639e-05	486.177	470.489	747.089	764.095
chr11:106326990-106331153	1120.55	-0.515348	0.101667	-5.06898	3.99963e-07	1.65805e-05	1258.66	1376.71	915.598	931.24
chr10:81351359-81354936	517.02	0.754868	0.148965	5.06744	4.03206e-07	1.67029e-05	382.189	387.412	598.061	700.42
chr14:2783485-2785546	305.179	0.936883	0.184906	5.06681	4.04544e-07	1.67463e-05	218.78	200.911	391.564	409.463
chr15:51008943-51013174	4114.91	-0.297671	0.0587809	-5.06407	4.10398e-07	1.69764e-05	4520.1	4555.69	3634.14	3749.72
chr16:25196874-25199175	339.025	0.945672	0.187012	5.05674	4.26489e-07	1.76293e-05	232.285	231.43	394.486	497.9
chr9:34961940-34962869	127.641	1.61986	0.320512	5.05398	4.32689e-07	1.78728e-05	79.679	47.4727	168.509	214.902
chr21:33767767-33769785	215.056	1.18259	0.234027	5.0532	4.34479e-07	1.79339e-05	153.956	111.052	307.797	287.42
chrX:90073604-90076140	977.594	-0.541622	0.107194	-5.05273	4.35541e-07	1.79648e-05	1156.02	1162.23	761.699	830.422
chr10:99068822-99072502	487.014	0.762334	0.150882	5.05251	4.36037e-07	1.79724e-05	351.128	370.457	651.633	574.84
chr23:14963114-14965824	1036.39	-0.532136	0.105324	-5.05236	4.36387e-07	1.7974e-05	1168.18	1280.92	838.648	857.838
chr12:19506117-19510386	468.729	0.757026	0.149937	5.04898	4.44183e-07	1.82775e-05	360.581	337.396	574.684	602.255
chr8:39216370-39219108	765.292	0.614095	0.12163	5.04889	4.44392e-07	1.82775e-05	567.207	640.034	925.338	928.587
chr14:65533008-65534671	289.505	0.96416	0.190998	5.048	4.4646e-07	1.83495e-05	195.821	196.673	361.369	404.156
chr4:33805780-33808531	1057.26	0.539493	0.10693	5.04528	4.52859e-07	1.85992e-05	804.893	915.546	1244.82	1263.76
chr13:29718136-29721884	1718.34	0.425287	0.0843161	5.04396	4.55991e-07	1.87011e-05	1485.54	1449.61	1903.27	2034.93
chr4:10671451-10672703	50.4506	2.49099	0.493851	5.04401	4.55874e-07	1.87011e-05	12.1544	17.8023	79.8713	91.9743
chr19:23291661-23294130	219.974	1.0951	0.217168	5.04265	4.59126e-07	1.88163e-05	144.503	136.484	290.264	308.645
chr19:18974179-18982032	4957.96	0.284017	0.0563326	5.04178	4.61223e-07	1.88888e-05	4378.3	4560.77	5514.04	5378.73
chr9:52744141-52746033	227.943	1.1826	0.234701	5.03873	4.68643e-07	1.91791e-05	114.792	161.916	346.758	288.304
chr22:43633138-43634092	84.8769	1.89092	0.375305	5.03836	4.69541e-07	1.92022e-05	40.5148	32.2136	112.015	154.765
chr25:15688768-15691911	1512.33	-0.437867	0.086924	-5.03736	4.71995e-07	1.92888e-05	1702.97	1775.99	1281.84	1288.53
chr15:38312739-38313775	90.1729	1.90607	0.378465	5.03631	4.74592e-07	1.93675e-05	51.3187	26.2796	145.132	137.962
chr27:44174294-44177247	1217.99	-0.499154	0.0991087	-5.03643	4.74293e-07	1.93675e-05	1458.53	1396.21	960.403	1056.82
chr16:75645776-75649210	1385.51	0.473212	0.0939642	5.03609	4.75139e-07	1.9376e-05	1118.21	1200.38	1555.54	1667.92
chr10:17971220-17973291	313.331	0.919733	0.182675	5.03481	4.78322e-07	1.94921e-05	207.976	224.648	422.733	397.966
chr21:68012211-68015287	716.146	0.614808	0.122129	5.03408	4.80147e-07	1.95526e-05	580.712	551.871	878.584	853.416
chr11:43651435-43653608	426.84	0.781684	0.155302	5.03332	4.8205e-07	1.96162e-05	310.613	317.05	536.696	543.002
chr13:46308723-46310702	157.506	1.28998	0.256478	5.02959	4.91539e-07	1.99882e-05	93.184	89.8591	225.003	221.977
chr1:38679404-38680466	94.0721	1.70583	0.339194	5.02907	4.92854e-07	2.00275e-05	43.2158	44.9296	151.95	136.193
chr19:42501448-42503684	682.157	0.675228	0.134278	5.0286	4.94077e-07	2.00631e-05	495.631	553.566	778.258	901.172
chr4:101615323-101616036	48.3837	2.50844	0.499048	5.02645	4.99639e-07	2.02747e-05	13.5049	15.2591	79.8713	84.8994
chr8:62225001-62231763	3126.45	0.361216	0.0718868	5.02479	5.03976e-07	2.04362e-05	2707.74	2766.14	3327.32	3704.62
chr22:54025939-54027313	88.347	1.83291	0.364898	5.02308	5.08485e-07	2.06045e-05	43.2158	34.7568	157.794	117.621
chr17:4535972-4538102	402.64	0.958248	0.190783	5.02271	5.09461e-07	2.06296e-05	217.429	326.375	511.371	555.384
chr19:35931486-35933520	355.418	0.917078	0.182612	5.02201	5.11345e-07	2.06913e-05	213.378	276.359	478.254	453.681
chr20:28678934-28683014	1152.03	0.491308	0.0978357	5.02177	5.1198e-07	2.07025e-05	938.592	975.734	1345.15	1348.66
chr16:1280134-1281508	318.28	0.921099	0.183533	5.01871	5.20189e-07	2.10196e-05	212.027	227.191	441.24	392.66
chr3:33617966-33619390	159.5	1.43252	0.285481	5.01789	5.22409e-07	2.10945e-05	109.39	65.275	220.133	243.201
chr18:36796871-36800331	1067.57	-0.505978	0.100854	-5.01693	5.25041e-07	2.1186e-05	1242.45	1263.11	868.844	895.865
chr9:29602595-29604088	251.41	1.02409	0.20418	5.01562	5.28636e-07	2.13161e-05	175.564	156.83	329.225	344.019
chr7:109873976-109875105	155.743	1.37334	0.273869	5.01461	5.31417e-07	2.14132e-05	103.988	71.2091	224.029	223.745
chr4:38909098-38913163	415.267	0.796301	0.15883	5.01356	5.34331e-07	2.15156e-05	305.211	301.791	546.436	507.628
chr16:59646083-59648652	792.713	-0.577156	0.115133	-5.01294	5.36054e-07	2.15699e-05	950.747	947.759	631.178	641.167
chr18:36468709-36470671	128.844	1.45177	0.28974	5.0106	5.42602e-07	2.18058e-05	60.7722	76.2955	189.938	188.371
chr5:38580624-38581831	125.775	1.54189	0.307727	5.01058	5.42673e-07	2.18058e-05	66.1741	62.7318	154.872	219.323
chr20:23937103-23938225	190.994	1.17243	0.234036	5.00964	5.45332e-07	2.18973e-05	118.843	116.139	251.302	277.692
chr13:33352961-33355650	183.883	1.18819	0.237201	5.0092	5.46558e-07	2.19313e-05	113.441	111.052	248.38	262.658
chr28:36960790-36962466	184.78	1.20075	0.239728	5.0088	5.47694e-07	2.19615e-05	121.544	103.423	262.991	251.161
chr19:33046847-33050606	965.173	0.570616	0.113989	5.00587	5.56102e-07	2.22832e-05	713.06	836.707	1172.74	1138.18
chr21:33662338-33669577	1080.97	0.501928	0.100296	5.00445	5.60207e-07	2.2432e-05	895.376	894.353	1253.59	1280.57
chr8:96680471-96681591	65.8474	2.08977	0.417624	5.00396	5.61646e-07	2.2474e-05	21.6079	27.975	112.989	100.818
chr7:12073051-12074765	188.643	1.16883	0.233596	5.00364	5.62588e-07	2.24961e-05	116.142	116.139	264.939	257.351
chr8:39572318-39574172	379.443	0.910285	0.181995	5.00171	5.68249e-07	2.27067e-05	234.986	289.923	544.488	448.375
chr8:80807212-80809254	512.177	0.712987	0.142559	5.00134	5.69324e-07	2.27339e-05	386.241	389.955	623.386	649.127
chr25:30005359-30008916	586.098	0.674133	0.1348	5.00099	5.70355e-07	2.27466e-05	437.56	464.555	738.322	703.957
chr9:9747115-9748266	112.87	1.57551	0.31504	5.00097	5.70432e-07	2.27466e-05	66.1741	48.3205	173.379	163.608
chr10:2602780-2604491	161.849	1.26317	0.252628	5.00013	5.7291e-07	2.28296e-05	94.5345	95.7932	228.899	228.167
chr28:26475628-26478954	1588.39	0.462013	0.092412	4.99949	5.74831e-07	2.28903e-05	1276.22	1393.66	1751.32	1932.35
chr1:7970638-7972589	335.939	0.885032	0.177053	4.99869	5.77224e-07	2.29697e-05	239.037	233.125	456.825	414.769
chr10:73386360-73387826	163.204	1.30913	0.261966	4.99734	5.81265e-07	2.31145e-05	106.689	82.2296	245.458	218.439
chr26:8919397-8921835	288.061	0.958587	0.191831	4.99705	5.82149e-07	2.31337e-05	183.667	206.846	368.187	393.544
chr4:106996657-107001551	574.03	0.700925	0.140333	4.99473	5.89171e-07	2.33966e-05	405.148	467.098	730.53	693.345
chr9:69916969-69920954	989.983	0.521648	0.104456	4.99393	5.91642e-07	2.34785e-05	815.697	810.428	1152.29	1181.52
chr2:111839659-111842312	528.858	0.710162	0.142265	4.99182	5.98137e-07	2.3714e-05	410.55	392.498	681.828	630.555
chr27:34140410-34144780	395.964	0.834652	0.167207	4.99173	5.984e-07	2.3714e-05	268.748	299.248	477.28	538.581
chr5:74660214-74663802	561.561	0.705931	0.14153	4.98787	6.10494e-07	2.416e-05	434.859	419.625	650.659	741.101
chr7:43625986-43628030	441.895	0.778301	0.156038	4.98788	6.10443e-07	2.416e-05	333.572	317.898	586.372	529.737
chr19:22196591-22201506	1683.23	-0.426354	0.0855027	-4.98644	6.15008e-07	2.4322e-05	1983.87	1878.56	1390.93	1479.55
chr22:42872598-42881121	786.726	0.581091	0.116548	4.98586	6.16876e-07	2.43791e-05	645.535	616.298	937.026	948.043
chr14:72348097-72350956	947.146	0.536105	0.107613	4.9818	6.29944e-07	2.48785e-05	769.781	776.518	1089.95	1152.33
chr19:50657276-50658998	294.561	0.933196	0.187348	4.98107	6.32321e-07	2.49552e-05	195.821	208.541	394.486	379.394
chr11:6338991-6341388	335.85	0.923336	0.185418	4.97975	6.36659e-07	2.51092e-05	216.079	246.689	401.304	479.328
chr20:26268370-26272271	1208.9	-0.477293	0.0958848	-4.97777	6.43212e-07	2.53341e-05	1422.07	1392.82	988.651	1032.06
chr5:51273650-51276957	1655.78	0.416249	0.0836218	4.97776	6.43241e-07	2.53341e-05	1391.01	1444.53	1900.35	1887.24
chr12:34632565-34635612	588.381	0.68388	0.137444	4.97571	6.50079e-07	2.55859e-05	474.023	430.646	694.49	754.366
chr25:27384043-27387551	484.566	0.802292	0.161271	4.97479	6.53171e-07	2.56901e-05	384.89	323.832	560.073	669.467
chr10:49473320-49475461	521.56	0.714502	0.143674	4.97308	6.58986e-07	2.58898e-05	398.395	391.65	678.906	617.289
chr13:77771997-77783222	1697.54	0.465093	0.0935251	4.97293	6.59502e-07	2.58898e-05	1530.11	1327.54	1889.64	2042.89
chr14:61160570-61168568	4159.28	-0.293597	0.0590395	-4.9729	6.59598e-07	2.58898e-05	4528.2	4632.83	3675.05	3801.02
chr12:73081106-73083089	400.954	0.883618	0.177727	4.97178	6.63397e-07	2.60034e-05	324.118	242.45	536.696	500.553
chr5:25934967-25938088	2998.28	-0.345579	0.0695069	-4.97187	6.63111e-07	2.60034e-05	3265.49	3442.62	2728.29	2556.71
chr6:22307690-22310008	205.432	1.13398	0.228263	4.96788	6.76882e-07	2.6514e-05	140.451	117.834	289.29	274.154
chr16:28990258-28991144	78.1951	1.86244	0.374939	4.96732	6.78844e-07	2.65727e-05	36.4633	31.3659	124.677	120.274
chr19:35364110-35365716	146.733	1.40032	0.281914	4.96717	6.79373e-07	2.65754e-05	79.679	81.3818	245.458	180.411
chr14:81933489-81935108	377.865	0.918202	0.184945	4.96474	6.87925e-07	2.68917e-05	240.388	281.446	432.474	557.152
chr8:53731089-53737282	2908.03	0.34175	0.0688373	4.9646	6.88437e-07	2.68934e-05	2564.58	2565.22	3357.52	3144.82
chr3:101285293-101287331	609.115	0.700064	0.141119	4.96081	7.0199e-07	2.74043e-05	421.354	504.398	722.738	787.973
chr3:584414-588858	762.861	0.617848	0.124554	4.96048	7.03188e-07	2.74324e-05	586.114	617.146	862.999	985.187
chr6:86876584-86878591	361.892	0.901753	0.181849	4.9588	7.09317e-07	2.76528e-05	270.098	235.668	518.189	423.613
chr11:86077929-86079987	429.713	0.782737	0.157889	4.95751	7.14032e-07	2.78178e-05	334.922	298.4	532.8	552.73
chr7:20490632-20492711	280.33	1.12902	0.227809	4.95599	7.19616e-07	2.80164e-05	136.4	212.78	346.758	425.381
chr2:38278773-38282102	825.787	-0.600818	0.12126	-4.9548	7.24032e-07	2.80996e-05	939.943	1049.49	619.489	694.229
chr21:68398702-68399482	56.6863	2.44859	0.49418	4.95486	7.23808e-07	2.80996e-05	16.2059	18.65	124.677	67.212
chr8:82213898-82215770	455.832	-0.76934	0.15527	-4.95486	7.23818e-07	2.80996e-05	533.444	614.603	332.148	343.135
chr9:9418340-9420482	434.411	0.765011	0.154399	4.95476	7.24194e-07	2.80996e-05	313.314	329.766	544.488	550.077
chr9:50447229-50449280	341.16	0.889321	0.179481	4.95497	7.23417e-07	2.80996e-05	251.192	228.039	472.409	413
chr6:17168008-17175055	1040.53	0.58797	0.118704	4.95326	7.29803e-07	2.82982e-05	810.295	851.966	1121.12	1378.73
chr12:11169661-11171327	168.733	1.32438	0.267505	4.95085	7.389e-07	2.86316e-05	98.5859	94.0978	281.498	200.752
chr27:15200492-15201491	87.4242	1.76621	0.35685	4.94944	7.44258e-07	2.88198e-05	40.5148	38.9955	149.028	121.159
chr6:15804171-15806660	595.436	0.676542	0.136714	4.94859	7.47535e-07	2.89273e-05	488.878	429.798	743.192	719.876
chr13:43034372-43035399	87.8906	1.81962	0.36775	4.948	7.49805e-07	2.89956e-05	47.2672	31.3659	150.002	122.927
chr12:31884776-31888333	258.681	0.987637	0.199693	4.94578	7.58403e-07	2.93085e-05	167.461	178.871	349.68	338.713
chr1:7960306-7962669	201.112	1.14384	0.231344	4.94433	7.64064e-07	2.95074e-05	112.091	137.332	274.679	280.345
chr2:128143545-128149863	1171.46	0.503848	0.101926	4.94329	7.68162e-07	2.96322e-05	911.582	1023.21	1351.97	1399.07
chr8:20750985-20751634	79.1272	1.96995	0.398513	4.94325	7.68325e-07	2.96322e-05	24.3089	38.9955	147.08	106.124
chr11:37677416-37680471	1755.07	0.437661	0.0885711	4.94135	7.75838e-07	2.99019e-05	1404.51	1573.38	1958.79	2083.57
chr14:44904602-44909992	1970.41	0.418546	0.0847412	4.93911	7.84796e-07	3.0227e-05	1582.78	1785.31	2302.63	2210.92
chr1:152322673-152327630	1163.39	0.483966	0.098095	4.93365	8.07079e-07	3.10645e-05	991.261	950.303	1331.51	1380.5
chr1:104883982-104886925	616.421	0.652549	0.132281	4.93307	8.09467e-07	3.1094e-05	457.817	499.312	766.569	741.985
chr1:145435980-145437740	257.653	1.03642	0.210095	4.93309	8.09409e-07	3.1094e-05	180.966	157.677	378.902	313.067
chr5:109424006-109428434	1367.67	0.449717	0.0911611	4.93321	8.08873e-07	3.1094e-05	1129.01	1181.73	1595.48	1564.45
chr17:6319534-6321752	365.699	1.01469	0.205698	4.93293	8.10054e-07	3.10958e-05	251.192	233.973	388.642	588.99
chr19:42734191-42738736	1431.54	-0.441179	0.089458	-4.93169	8.15196e-07	3.12724e-05	1666.51	1631.88	1183.46	1244.31
chr8:74973632-74976575	1241.92	0.503338	0.10209	4.93034	8.20865e-07	3.14688e-05	952.097	1098.65	1482.49	1434.45
chr1:90091007-90095549	493.748	0.716577	0.145369	4.92938	8.24928e-07	3.16036e-05	363.282	383.173	606.827	621.711
chr11:15526231-15529657	644.839	0.674003	0.136747	4.92882	8.27285e-07	3.16728e-05	509.136	485.748	726.634	857.838
chr19:52462760-52463262	6114.32	-0.309507	0.0628063	-4.92796	8.30941e-07	3.17522e-05	7018.51	6519.87	5740.02	5178.86
chr25:9975994-9976872	169.288	1.33737	0.271385	4.92794	8.31014e-07	3.17522e-05	72.9266	116.986	239.614	247.623
chr7:20533115-20535059	255.027	0.998589	0.202631	4.92811	8.30271e-07	3.17522e-05	180.966	160.221	342.862	336.06
chr16:15739144-15741129	569.11	0.683125	0.138656	4.92677	8.3601e-07	3.19219e-05	452.415	422.168	731.504	670.351
chr14:80727922-80730325	438.518	-0.764266	0.155241	-4.9231	8.5182e-07	3.24981e-05	540.197	563.739	308.771	341.366
chr2:64989623-64992056	631.68	0.636843	0.12936	4.92301	8.52228e-07	3.24981e-05	484.827	503.55	753.907	784.435
chr16:44299682-44302683	2138.57	-0.3842	0.0780789	-4.92067	8.62505e-07	3.28682e-05	2380.92	2461.8	1785.42	1926.16
chr20:37311117-37312847	349.372	0.860886	0.174967	4.92028	8.64197e-07	3.29109e-05	243.089	252.623	477.28	424.497
chr1:22102227-22104579	355.318	0.835468	0.169841	4.91912	8.69328e-07	3.30844e-05	255.243	255.166	460.721	450.144
chr2:4091169-4096533	2326.93	0.368139	0.0748588	4.91778	8.75319e-07	3.32904e-05	1955.51	2104.06	2626.01	2622.15
chr24:22124881-22126871	220.76	1.07433	0.218509	4.91663	8.80478e-07	3.34645e-05	151.255	133.941	288.316	309.529
chr14:44223856-44226057	614.979	0.640514	0.130366	4.91319	8.96065e-07	3.40345e-05	488.878	473.032	748.063	749.945
chr11:46323013-46331240	3196.61	0.318527	0.0648364	4.91278	8.97948e-07	3.40836e-05	2836.03	2853.45	3620.51	3476.45
chr20:14044993-14050567	1016.45	0.507307	0.103304	4.91083	9.06911e-07	3.44011e-05	842.707	836.707	1175.67	1210.7
chr2:73246248-73248792	1081.46	0.491493	0.100102	4.90993	9.11102e-07	3.45373e-05	894.026	903.678	1265.28	1262.88
chr18:31418766-31420363	265.005	1.06953	0.217887	4.90862	9.17181e-07	3.47449e-05	137.75	201.759	362.343	358.169
chr13:81372587-81391408	13187.3	0.224587	0.0458283	4.90062	9.55339e-07	3.61666e-05	11877.6	12442.9	13947.3	14481.5
chr5:19927119-19929718	230.706	1.03553	0.211355	4.89947	9.60974e-07	3.6356e-05	152.606	150.048	319.485	300.685
chr10:17975038-17980211	668.483	0.716327	0.146244	4.89816	9.67374e-07	3.65501e-05	434.859	573.064	795.791	870.219
chr6:44598210-44600672	542.852	0.689025	0.14067	4.89816	9.67362e-07	3.65501e-05	407.849	423.016	641.892	698.651
chr19:26125904-26129301	470.725	0.760223	0.155273	4.89605	9.77798e-07	3.68955e-05	334.922	362.827	635.074	550.077
chr6:67882519-67883959	145.766	1.30718	0.266986	4.89608	9.77686e-07	3.68955e-05	81.0295	86.4682	210.393	205.174
chr17:46315090-46316535	462.402	0.759718	0.155176	4.89584	9.7886e-07	3.69114e-05	370.035	318.746	562.995	597.833
chr10:4089036-4090176	94.0863	1.64934	0.337012	4.89399	9.88106e-07	3.72357e-05	43.2158	47.4727	144.158	141.499
chr21:34671512-34680549	4401.36	-0.28612	0.0584673	-4.89367	9.89736e-07	3.72727e-05	4752.38	4918.52	3900.06	4034.49
chr19:14770248-14772989	917.288	0.546193	0.111633	4.89277	9.9428e-07	3.74194e-05	725.214	764.65	1135.73	1043.56
chr16:65927351-65931462	1088.64	0.495616	0.101318	4.89169	9.99738e-07	3.76002e-05	900.778	906.221	1236.06	1311.52
chr20:68127330-68128286	118.439	1.5011	0.306939	4.89055	1.00552e-06	3.7793e-05	51.3187	71.2091	174.353	176.874
chr9:97434683-97439240	2460.88	-0.366911	0.0750772	-4.88712	1.02323e-06	3.84335e-05	2671.27	2869.56	2212.04	2090.65
chr2:125326601-125328946	431.168	0.824889	0.168848	4.88538	1.03229e-06	3.87487e-05	351.128	273.816	571.761	527.968
chr22:53465841-53468123	934.46	0.558009	0.114276	4.883	1.04486e-06	3.9195e-05	698.205	810.428	1101.64	1127.57
chr11:97853774-97857687	1270.99	-0.47136	0.0965398	-4.88254	1.04727e-06	3.92588e-05	1531.46	1424.18	1033.46	1094.85
chr3:48601653-48606401	269.386	0.991002	0.202974	4.88242	1.04793e-06	3.92588e-05	166.111	193.282	384.746	333.407
chr27:36914149-36918062	1086.32	0.537511	0.110114	4.88143	1.05322e-06	3.94313e-05	871.068	901.134	1186.38	1386.69
chr5:104184603-104189947	3045.02	0.343392	0.0703697	4.87984	1.06174e-06	3.97244e-05	2618.6	2746.64	3543.56	3271.28
chr7:43257508-43260854	793.123	-0.562862	0.115388	-4.878	1.07166e-06	4.00697e-05	961.551	930.805	638.97	641.167
chr29:36593624-36597508	2130.58	0.397206	0.0814482	4.87679	1.07825e-06	4.029e-05	1739.43	1934.51	2365.94	2482.42
chr2:128671827-128672395	66.11	2.10497	0.431676	4.87628	1.08107e-06	4.03575e-05	28.3603	22.0409	86.6896	127.349
chr20:40331226-40334726	778.584	0.600987	0.123249	4.87621	1.08146e-06	4.03575e-05	652.288	587.475	890.272	984.302
chr15:13979340-13982634	819.421	0.599506	0.122979	4.87485	1.08888e-06	4.06082e-05	605.021	695.137	1038.33	939.2
chr11:95293861-95295710	296.82	0.912787	0.18728	4.87393	1.09401e-06	4.0773e-05	203.924	207.693	404.227	371.435
chr11:18867200-18876200	2209.61	0.447023	0.0917437	4.87251	1.10187e-06	4.10393e-05	1682.71	2050.65	2493.54	2611.54
chr4:79263876-79266586	577.002	0.687554	0.141228	4.86838	1.12516e-06	4.18797e-05	405.148	476.423	729.556	696.883
chr7:43612761-43616017	175.828	1.20894	0.248356	4.86776	1.12873e-06	4.19853e-05	114.792	98.3364	262.017	228.167
chrX:15920371-15923029	254.048	1.0092	0.207337	4.86741	1.13069e-06	4.20313e-05	171.513	166.155	309.745	368.782
chr3:54927969-54930272	340.541	0.892541	0.183442	4.86552	1.14158e-06	4.24085e-05	209.326	265.339	447.084	440.416
chr13:2171580-2174884	620.599	0.631589	0.129822	4.86505	1.14427e-06	4.24811e-05	478.074	495.073	754.881	754.366
chr28:19732991-19738271	1549.26	-0.417209	0.0857719	-4.86417	1.14938e-06	4.26259e-05	1793.45	1750.56	1344.18	1308.87
chr7:96400304-96405124	874.574	0.547969	0.112655	4.86412	1.14965e-06	4.26259e-05	727.915	694.289	1004.24	1071.85
chr24:24156532-24158710	405.512	0.786309	0.161713	4.86238	1.15985e-06	4.29765e-05	282.253	311.964	501.631	526.199
chr20:66483030-66486077	331.385	0.883735	0.181787	4.86139	1.16566e-06	4.31638e-05	210.677	253.471	432.474	428.919
chr2:84194280-84196101	235.507	1.0325	0.212481	4.85926	1.17827e-06	4.36029e-05	145.853	162.764	300.004	333.407
chrX:88562136-88565479	538.888	0.724785	0.149263	4.85575	1.19929e-06	4.43521e-05	371.385	439.123	633.126	711.917
chr16:41946975-41951522	1303.54	0.486728	0.100265	4.85441	1.20748e-06	4.46265e-05	1115.51	1057.96	1424.05	1616.63
chr1:94984586-94986423	281.353	0.925582	0.190762	4.85202	1.22211e-06	4.51381e-05	193.12	194.977	362.343	374.972
chr10:46432229-46433940	181.207	1.19892	0.247286	4.84831	1.24518e-06	4.59609e-05	125.596	95.7932	252.276	251.161
chr10:7927385-7931957	1433.38	0.428018	0.088286	4.84808	1.24659e-06	4.59833e-05	1224.9	1219.88	1640.28	1648.46
chr5:5282801-5284259	180.194	1.23852	0.255501	4.84742	1.25079e-06	4.61088e-05	91.8335	121.225	279.549	228.167
chr7:54206062-54207063	64.6354	2.04185	0.42131	4.84644	1.25698e-06	4.63072e-05	27.0098	23.7364	114.937	92.8587
chr14:46407678-46414827	3042.84	0.336254	0.0693919	4.84572	1.26152e-06	4.63853e-05	2657.77	2721.21	3261.09	3531.28
chr21:57370796-57372265	107.745	1.5298	0.315688	4.84592	1.26027e-06	4.63853e-05	56.7207	54.2546	171.431	148.574
chr5:60140162-60145875	2813.69	0.332804	0.0686785	4.84583	1.26087e-06	4.63853e-05	2476.8	2504.19	3055.56	3218.22
chr16:50448926-50450101	267.065	0.960386	0.198242	4.84452	1.26916e-06	4.66366e-05	175.564	186.5	370.135	336.06
chr17:61053253-61057390	754.108	-0.587002	0.121229	-4.84211	1.28467e-06	4.71766e-05	861.614	947.759	613.645	593.411
chr10:79492951-79495610	652.265	0.651925	0.134686	4.84032	1.29628e-06	4.75723e-05	469.971	542.546	761.699	834.844
chr5:115416476-115418000	424.683	0.792307	0.163774	4.8378	1.31281e-06	4.81483e-05	341.675	282.293	550.333	524.431
chr7:43620351-43625545	829.407	0.659209	0.136266	4.83767	1.3137e-06	4.81504e-05	737.369	553.566	1034.43	992.262
chr14:63868099-63869474	90.3163	1.84702	0.381894	4.83646	1.32172e-06	4.84134e-05	54.0197	26.2796	141.236	139.73
chr4:20623574-20628200	780.527	0.589309	0.121878	4.83523	1.32992e-06	4.86829e-05	582.062	662.075	917.546	960.424
chr5:18290197-18291702	194.06	1.19522	0.247214	4.83477	1.33297e-06	4.87635e-05	140.451	97.4887	265.913	272.386
chr3:109496342-109504556	2532.94	0.344939	0.0713585	4.83389	1.3389e-06	4.89495e-05	2291.79	2174.42	2808.16	2857.4
chr28:29919815-29934791	2223.26	0.371507	0.0768583	4.83366	1.34047e-06	4.89756e-05	1898.79	1976.9	2424.39	2592.97
chr8:501744-504934	892.536	0.533141	0.110321	4.83262	1.34749e-06	4.92008e-05	711.709	746	1072.42	1040.02
chr1:145589520-145590689	125.248	1.4004	0.289871	4.83112	1.35768e-06	4.95103e-05	66.1741	71.2091	174.353	189.255
chr9:23276432-23283274	3164.82	-0.33388	0.0691094	-4.83118	1.35725e-06	4.95103e-05	3366.78	3687.62	2802.31	2802.56
chr1:117800119-117802040	270.339	0.941974	0.19503	4.8299	1.36603e-06	4.97831e-05	189.069	181.414	363.317	347.557
chr1:143679375-143682485	555.414	-0.671421	0.139036	-4.8291	1.37148e-06	4.99503e-05	699.555	665.466	448.058	408.578
chr10:47442954-47444434	295.316	0.908091	0.188081	4.82818	1.37788e-06	5.01515e-05	194.471	215.323	377.927	393.544
chr21:44511772-44514282	485.905	0.722654	0.14971	4.82703	1.38583e-06	5.04092e-05	341.675	389.955	600.009	611.983
chr20:66466919-66468337	92.1017	1.68655	0.349437	4.82648	1.38971e-06	5.05181e-05	36.4633	50.0159	132.469	149.458
chr9:69037484-69044346	2960.85	0.375705	0.0778455	4.8263	1.39096e-06	5.05317e-05	2397.12	2751.72	3245.5	3449.04
chr15:42267062-42269690	1279.34	-0.465087	0.0964042	-4.82434	1.40468e-06	5.09981e-05	1539.56	1430.12	1042.22	1105.46
chr1:151144516-151146480	497.183	0.705114	0.146192	4.82322	1.41261e-06	5.12228e-05	360.581	394.193	627.282	606.677
chr14:3083477-3090115	3559.11	0.30687	0.0636236	4.82321	1.41265e-06	5.12228e-05	3157.45	3206.11	3826.03	4046.87
chr5:35020063-35022019	239.734	1.0048	0.208479	4.81966	1.43804e-06	5.21107e-05	151.255	167.002	311.693	328.985
chr15:20140486-20145097	776.505	0.574095	0.119126	4.81921	1.44129e-06	5.2162e-05	632.03	616.298	966.248	891.444
chr17:10362136-10364195	308.44	0.92218	0.191358	4.81913	1.44186e-06	5.2162e-05	187.718	236.516	397.408	412.116
chr4:9646381-9648145	404.46	0.804798	0.167003	4.81906	1.44235e-06	5.2162e-05	324.118	267.034	508.449	518.24
chr8:39502645-39506202	477.678	0.742341	0.154046	4.81896	1.44308e-06	5.2162e-05	333.572	379.782	565.917	631.439
chr9:94450669-94459509	4952.13	-0.264392	0.0548746	-4.81812	1.44921e-06	5.23505e-05	5414.12	5395.79	4449.41	4549.19
chr5:19504715-19508810	312.804	0.873765	0.181406	4.81662	1.46013e-06	5.27119e-05	226.883	215.323	411.045	397.966
chr24:41089090-41091574	1175.02	0.46696	0.0969827	4.81488	1.47288e-06	5.31391e-05	1006.12	968.105	1356.84	1369
chr2:127370860-127371958	65.1655	2.01443	0.418512	4.81332	1.48445e-06	5.3523e-05	28.3603	23.7364	94.4819	114.084
chr10:17658862-17664017	2041.35	0.370175	0.0769164	4.81269	1.4891e-06	5.36569e-05	1742.14	1817.53	2314.32	2291.4
chr3:20499214-20500743	140.908	1.39059	0.288958	4.81242	1.49117e-06	5.3698e-05	94.5345	62.7318	206.496	199.867
chr24:30374367-30375936	143.756	1.52132	0.316139	4.8122	1.4928e-06	5.37232e-05	94.5345	55.95	173.379	251.161
chr9:86211463-86214684	519.261	0.811615	0.168663	4.81205	1.49389e-06	5.37286e-05	433.508	323.832	598.061	721.645
chr19:44021085-44022617	186.838	1.1603	0.24113	4.81191	1.49492e-06	5.37321e-05	124.245	107.661	238.64	276.807
chr1:58415920-58417415	163.523	1.21473	0.25251	4.81064	1.50446e-06	5.40413e-05	98.5859	98.3364	239.614	217.555
chr15:39971707-39979868	1119.27	0.504862	0.104962	4.80996	1.50957e-06	5.4191e-05	923.737	927.414	1232.16	1393.77
chr3:30793522-30795780	227.192	1.0452	0.217324	4.80943	1.51363e-06	5.43031e-05	153.956	143.266	283.446	328.101
chr29:24881773-24888542	1224.41	-0.476202	0.0990289	-4.80871	1.51904e-06	5.44631e-05	1492.29	1358.91	1047.09	999.337
chr18:26320764-26323145	118.237	1.44605	0.300891	4.8059	1.5406e-06	5.52018e-05	56.7207	69.5137	173.379	173.336
chr14:24715132-24718858	1982.29	-0.371288	0.0773225	-4.80181	1.57236e-06	5.63049e-05	2264.78	2208.33	1709.44	1746.63
chr7:61165930-61168148	302.205	0.91557	0.190682	4.80156	1.57431e-06	5.63395e-05	198.522	219.561	366.239	424.497
chr2:118182083-118183351	156.98	1.26298	0.263066	4.80099	1.57883e-06	5.64663e-05	81.0295	102.575	215.263	229.051
chr11:101029912-101030930	75.3552	1.98314	0.413281	4.79852	1.59841e-06	5.71309e-05	35.1128	26.2796	148.054	91.9743
chr11:26365916-26368145	143.372	1.35677	0.282801	4.79761	1.60566e-06	5.73547e-05	79.679	81.3818	176.301	236.126
chr26:14742067-14749343	3032.87	0.312106	0.0650598	4.79722	1.60886e-06	5.73977e-05	2726.64	2686.45	3370.18	3348.22
chr7:65496612-65501441	891.627	0.542099	0.113003	4.79722	1.60885e-06	5.73977e-05	694.153	756.173	1026.64	1089.54
chr5:110601090-110603824	593.9	0.671556	0.140044	4.79533	1.62405e-06	5.79038e-05	469.971	446.752	784.102	674.773
chr6:44835101-44836727	179.876	1.17419	0.244995	4.79273	1.64524e-06	5.86227e-05	122.895	99.1841	254.224	243.201
chr6:22222138-22226292	1874.4	-0.417659	0.0871653	-4.79158	1.65477e-06	5.8926e-05	2135.13	2153.23	1497.1	1712.14
chr5:94938925-94940382	151.86	1.24848	0.260606	4.79066	1.6623e-06	5.91577e-05	89.1325	90.7069	216.237	211.364
chr24:41896387-41898949	251.126	1.0118	0.211261	4.78932	1.6735e-06	5.95192e-05	186.368	148.352	320.459	349.326
chr4:114178155-114180770	1519.77	-0.419124	0.087517	-4.78906	1.67563e-06	5.95583e-05	1765.09	1714.11	1266.25	1333.63
chr2:104926018-104930065	2914.55	0.319395	0.0666983	4.78865	1.67909e-06	5.96443e-05	2571.34	2614.39	3187.06	3285.43
chr14:81654551-81660338	4618.67	-0.293009	0.0612036	-4.78745	1.68913e-06	5.99641e-05	5231.81	4944.8	4015.97	4282.11
chr5:46337379-46339257	594.193	0.63525	0.132741	4.78564	1.70441e-06	6.04691e-05	469.971	461.164	736.374	709.264
chr8:112927359-112932367	1765.1	0.386353	0.080747	4.78474	1.71211e-06	6.07049e-05	1530.11	1530.15	2009.44	1990.71
chr3:92963982-92966173	200.29	1.11301	0.232644	4.78415	1.71709e-06	6.08443e-05	112.091	139.875	278.575	270.617
chr13:11547063-11550592	510.281	0.805301	0.168359	4.78325	1.72485e-06	6.10815e-05	313.314	426.407	600.983	700.42
chr5:44814940-44817737	1302.36	0.481796	0.10073	4.78305	1.72655e-06	6.1104e-05	1019.62	1150.37	1583.79	1455.67
chr9:88262505-88266138	2141.37	-0.366715	0.0767432	-4.77847	1.7663e-06	6.24726e-05	2483.56	2343.12	1840.94	1897.86
chr2:93010080-93011811	249.962	0.971144	0.203342	4.77592	1.78885e-06	6.32314e-05	160.709	176.327	331.174	331.638
chr6:68895697-68900394	3257.69	-0.323168	0.067689	-4.7743	1.8033e-06	6.37029e-05	3699	3546.04	2787.7	2998.01
chr19:7934383-7939331	1646.29	0.407764	0.0854176	4.77378	1.80802e-06	6.38306e-05	1466.63	1366.54	1869.18	1882.82
chr25:22656903-22659449	482.759	0.736251	0.154239	4.77346	1.81088e-06	6.38924e-05	329.52	392.498	625.334	583.683
chr2:122013249-122015992	900.711	-0.521611	0.109432	-4.76655	1.87404e-06	6.60804e-05	1035.83	1086.79	747.089	733.142
chr24:56690763-56693231	327.568	0.858535	0.180265	4.76263	1.91089e-06	6.73383e-05	216.079	248.384	416.889	428.919
chr29:8057050-8060254	766.177	0.57766	0.121344	4.76051	1.93105e-06	6.80073e-05	636.082	595.105	876.636	956.887
chr28:6224822-6228521	907.08	0.528267	0.11099	4.75961	1.93967e-06	6.82691e-05	722.513	762.107	1037.35	1106.35
chr26:10641497-10645189	1349.62	-0.441092	0.0926917	-4.75871	1.94838e-06	6.85339e-05	1522	1585.25	1179.56	1111.65
chr29:29423550-29427300	2342.63	0.365762	0.0768679	4.75832	1.95215e-06	6.86244e-05	1970.37	2121.01	2558.8	2720.32
chr16:66931813-66933159	238.988	1.001	0.210385	4.75794	1.95581e-06	6.8711e-05	155.307	162.764	338.966	298.917
chr3:102747356-102749113	107.489	1.56808	0.329719	4.75583	1.97635e-06	6.93904e-05	58.0712	50.8637	134.418	186.602
chr10:84826316-84830312	714.759	0.619964	0.130385	4.75487	1.98575e-06	6.9678e-05	605.021	524.743	820.142	909.131
chr27:20542595-20543830	159.847	1.31159	0.275985	4.75241	2.01009e-06	7.0489e-05	74.2771	107.661	252.276	205.174
chr22:43238158-43244337	1123.07	0.470234	0.0989552	4.75199	2.01425e-06	7.0549e-05	941.293	941.825	1328.59	1280.57
chr3:87030539-87031834	259.937	0.945513	0.198968	4.75208	2.01333e-06	7.0549e-05	180.966	174.632	351.628	332.523
chr8:933707-937680	1025.39	0.571126	0.120195	4.75165	2.01764e-06	7.06248e-05	779.234	868.073	1346.12	1108.11
chr16:70832247-70834690	494.257	0.725325	0.152697	4.7501	2.03311e-06	7.11231e-05	337.623	405.214	600.983	633.208
chr5:92459251-92461475	498.386	0.717064	0.151117	4.74509	2.08415e-06	7.28644e-05	407.849	348.416	596.112	641.167
chr6:46302892-46304132	111.764	1.5719	0.33132	4.74436	2.09171e-06	7.30841e-05	40.5148	70.3614	164.613	171.568
chr14:38776744-38782178	1739.1	0.391909	0.0826127	4.74393	2.09607e-06	7.31923e-05	1526.06	1483.52	2016.26	1930.58
chr3:14498325-14502939	1297.12	-0.479496	0.101115	-4.74208	2.11536e-06	7.38208e-05	1465.28	1555.58	1009.11	1158.52
chr20:22394681-22403987	1279.21	0.441378	0.0930798	4.74193	2.11688e-06	7.38294e-05	1074.99	1094.42	1487.36	1460.09
chr14:66532813-66538605	2931.42	-0.313015	0.0660241	-4.74092	2.12755e-06	7.41564e-05	3220.92	3274.77	2591.92	2638.07
chr7:46006432-46008670	857.577	0.537986	0.113499	4.74	2.13715e-06	7.44459e-05	669.844	727.35	1008.13	1024.98
chr28:39812446-39816176	1672.65	-0.409075	0.0863055	-4.73985	2.13872e-06	7.44556e-05	1832.62	1981.14	1469.83	1407.03
chr3:104837483-104840372	1164.44	-0.464159	0.0979948	-4.73656	2.17374e-06	7.56292e-05	1318.08	1380.95	997.417	961.309
chr19:55691083-55695647	770.218	0.587787	0.124169	4.73377	2.20385e-06	7.66106e-05	615.825	615.45	859.103	990.493
chr3:34238728-34241877	559.644	0.654941	0.138357	4.7337	2.20461e-06	7.66106e-05	456.466	414.539	685.724	681.848
chr13:66169210-66171696	175.269	1.16621	0.246411	4.73277	2.2148e-06	7.69181e-05	97.2354	117.834	245.458	240.548
chr2:69840257-69841882	710.309	0.580841	0.122735	4.73248	2.21793e-06	7.69805e-05	549.65	587.475	854.233	849.878
chr16:20233747-20236773	456.663	0.757539	0.160106	4.73148	2.22893e-06	7.73158e-05	370.035	311.116	540.592	604.908
chr19:18956250-18957861	405.836	0.799671	0.169111	4.72867	2.25997e-06	7.83453e-05	322.768	271.273	546.436	482.865
chr29:40758944-40761741	1157.27	-0.460874	0.0974849	-4.72765	2.27138e-06	7.86934e-05	1343.74	1337.71	953.585	994.03
chr4:119462587-119464509	90.9317	1.64248	0.347467	4.72701	2.27852e-06	7.88931e-05	49.9682	38.9955	131.495	143.268
chr21:58702898-58703768	105.31	1.49527	0.316379	4.72621	2.2875e-06	7.91566e-05	58.0712	52.5591	155.846	154.765
chr23:7016387-7018052	145.025	1.46147	0.309251	4.72583	2.29175e-06	7.9256e-05	60.7722	92.4023	170.457	256.467
chr11:38345176-38347174	359.619	0.822609	0.174112	4.72461	2.30561e-06	7.96875e-05	251.192	267.882	428.578	490.825
chr3:14080764-14089276	7279.88	-0.243296	0.0515672	-4.71802	2.38145e-06	8.22594e-05	7696.46	8083.08	6774.45	6565.55
chr15:75762556-75763424	96.1327	1.56978	0.332812	4.7167	2.39704e-06	8.27481e-05	48.6177	48.3205	136.366	151.227
chr4:98086479-98088352	275.145	0.922734	0.195683	4.71546	2.41168e-06	8.31961e-05	201.223	179.718	372.083	347.557
chr5:54937133-54947275	5708.47	0.32029	0.0679248	4.71535	2.4129e-06	8.31961e-05	4678.11	5467	6367.3	6321.47
chr15:40579276-40583222	1193.48	0.508712	0.107916	4.71395	2.42959e-06	8.37213e-05	941.293	1027.45	1296.45	1508.73
chr29:36700869-36704886	1302.79	-0.432705	0.0918497	-4.71101	2.46494e-06	8.48886e-05	1493.64	1499.63	1113.33	1104.58
chr28:27464490-27466639	337.255	0.833391	0.17702	4.70789	2.50298e-06	8.6147e-05	226.883	256.861	426.629	438.647
chr5:106185619-106186955	97.9607	1.73735	0.369041	4.70776	2.50456e-06	8.615e-05	60.7722	31.3659	133.443	166.261
chr19:50651563-50653363	382.38	0.844811	0.179457	4.7076	2.50656e-06	8.61672e-05	313.314	236.516	478.254	501.437
chr6:95520209-95522261	172.602	1.15879	0.246203	4.70663	2.51847e-06	8.65252e-05	106.689	106.814	252.276	224.63
chr15:56463584-56464763	101.679	1.51919	0.322858	4.70546	2.53293e-06	8.697e-05	52.6692	52.5591	143.184	158.302
chr4:26015235-26016144	83.2767	1.69229	0.359696	4.70478	2.54141e-06	8.72092e-05	37.8138	40.6909	133.443	121.159
chr3:101698144-101699934	695.048	-0.597092	0.126932	-4.70402	2.55083e-06	8.74802e-05	860.264	813.818	583.45	522.662
chrUn_NW_020190209v1:29578-30250	104.407	1.49533	0.317964	4.70282	2.56599e-06	8.79476e-05	51.3187	57.6455	153.898	154.765
chr10:11375742-11377668	232.072	1.00641	0.214268	4.69695	2.64079e-06	9.04576e-05	148.554	159.373	331.174	289.189
chr10:37581369-37586504	1902.98	0.384388	0.0818448	4.69655	2.64599e-06	9.05818e-05	1577.38	1720.89	2148.73	2164.93
chr6:16671985-16673014	71.0771	1.8739	0.399044	4.69597	2.65347e-06	9.07839e-05	32.4118	28.8227	98.378	124.696
chr3:33507307-33510123	449.804	0.777966	0.165716	4.69459	2.67144e-06	9.13444e-05	314.665	346.721	630.204	507.628
chr8:11189039-11191387	479.709	0.741032	0.157923	4.69235	2.70082e-06	9.22942e-05	370.035	349.264	541.566	657.97
chr5:75621716-75628049	1707.26	-0.397041	0.084628	-4.69161	2.71063e-06	9.25745e-05	1947.41	1933.67	1531.19	1416.76
chr14:317748-320861	1157.07	0.483818	0.10313	4.69133	2.71433e-06	9.25911e-05	933.19	994.384	1420.15	1280.57
chr2:80236477-80238392	266.992	0.925381	0.197251	4.69138	2.71366e-06	9.25911e-05	186.368	182.261	334.096	365.244
chr6:101455465-101457033	164.344	1.17118	0.249796	4.68855	2.75142e-06	9.38006e-05	101.287	100.88	227.925	227.283
chr26:17999873-18001692	231.816	0.988783	0.210923	4.68789	2.76032e-06	9.40486e-05	162.059	149.2	312.667	303.338
chr5:18426706-18429011	453.558	0.717608	0.153097	4.68726	2.76882e-06	9.42823e-05	361.932	325.527	558.125	568.649
chr15:59947117-59948584	230.365	0.989733	0.211169	4.68692	2.77345e-06	9.4384e-05	158.008	150.896	313.641	298.917
chr2:100897374-100898807	157.148	1.23104	0.262678	4.68649	2.77925e-06	9.45257e-05	82.38	104.27	227.925	214.017
chr28:4878434-4880065	272.91	-0.91646	0.195599	-4.6854	2.79419e-06	9.49776e-05	337.623	375.543	182.145	196.33
chr13:58623501-58625099	277.366	0.958305	0.204561	4.68469	2.80389e-06	9.52513e-05	171.513	204.302	332.148	401.503
chr3:25321989-25322459	43.1413	2.50803	0.535414	4.68427	2.80958e-06	9.53881e-05	16.2059	10.1727	70.1309	76.0557
chr5:26981004-26985155	520.258	0.678092	0.144776	4.68372	2.81708e-06	9.55865e-05	421.354	380.63	617.541	661.508
chr11:38527173-38531418	965.474	0.501548	0.107094	4.68323	2.8239e-06	9.57614e-05	810.295	789.234	1096.77	1165.6
chr7:49963208-49965510	464.618	0.705159	0.150593	4.68254	2.83347e-06	9.60295e-05	340.324	365.371	562.021	590.758
chr1:72357097-72359517	731.079	0.611684	0.130654	4.68171	2.84493e-06	9.62567e-05	540.197	614.603	825.012	944.506
chr16:55424784-55427085	587.523	-0.655691	0.140047	-4.68192	2.84201e-06	9.62567e-05	713.06	724.807	417.863	494.362
chr6:97910835-97914016	774.596	0.575753	0.12298	4.68169	2.84519e-06	9.62567e-05	602.32	640.882	871.766	983.418
chr4:29018120-29019301	111.724	1.43725	0.307186	4.67875	2.8863e-06	9.75903e-05	59.4217	61.0364	154.872	171.568
chrUn_NW_020190496v1:299810-302484	765.918	-0.552726	0.118178	-4.67706	2.91012e-06	9.83377e-05	907.531	913.85	640.918	601.371
chr1:143538955-143540708	610.892	-0.61822	0.1322	-4.67639	2.91971e-06	9.86041e-05	771.131	709.548	478.254	484.634
chr23:33408173-33411225	267.006	0.917011	0.196133	4.67545	2.93315e-06	9.9e-05	187.718	182.261	358.447	339.598
chr11:98053827-98057134	683.632	0.596612	0.127624	4.67476	2.94297e-06	9.9099e-05	517.239	569.673	797.739	849.878
chr3:118350921-118353365	513.578	0.688533	0.147287	4.67478	2.94274e-06	9.9099e-05	388.942	397.584	591.242	676.542
chr6:101521128-101522534	168.534	1.21442	0.25977	4.675	2.93951e-06	9.9099e-05	116.142	88.1637	252.276	217.555
chr7:102354339-102356108	186.769	1.12013	0.239605	4.67489	2.94107e-06	9.9099e-05	129.647	106.814	262.991	247.623
chr18:49200685-49203335	445.34	0.77355	0.165512	4.67368	2.95853e-06	9.94054e-05	361.932	297.552	600.983	520.893
chr21:57621044-57625517	1744.37	-0.386704	0.0827395	-4.67375	2.95743e-06	9.94054e-05	1929.85	2021.83	1540.93	1484.86
chr9:10500329-10502463	531.923	0.700518	0.149878	4.67393	2.95495e-06	9.94054e-05	424.055	387.412	713.971	602.255
chr9:82011063-82012478	85.7772	1.90821	0.408291	4.67365	2.95898e-06	9.94054e-05	49.9682	23.7364	159.743	109.662
chr11:68407431-68415950	3191.74	-0.307801	0.0658933	-4.67121	2.9943e-06	0.000100533	3454.56	3604.54	2912.38	2795.49
chr11:98335093-98336567	89.3983	1.61324	0.345381	4.6709	2.9989e-06	0.000100629	45.9167	42.3864	139.288	130.002
chr1:81050750-81055795	2230.72	-0.351768	0.0753696	-4.66724	3.05277e-06	0.000102377	2449.79	2551.66	1913.01	2008.4
chr11:48776319-48777478	58.2049	2.22383	0.47683	4.66377	3.10462e-06	0.000104055	14.8554	25.4318	74.027	118.505
chr23:31694355-31705761	4040.88	-0.287874	0.0617329	-4.66322	3.11296e-06	0.000104214	4394.5	4488.72	3757.85	3522.44
chr4:51283694-51284938	134.846	1.3985	0.299896	4.66327	3.11229e-06	0.000104214	63.4731	83.925	165.587	226.398
chr9:94127622-94129497	332.339	0.872273	0.187064	4.66296	3.11687e-06	0.000104284	230.934	238.211	477.28	382.932
chr22:28905455-28907695	245.316	0.994115	0.213204	4.66274	3.12023e-06	0.000104336	172.863	155.982	295.134	357.285
chr14:62093782-62097042	970.254	0.553411	0.118705	4.66209	3.13022e-06	0.000104601	729.266	840.946	1075.34	1235.46
chr6:37380247-37381620	80.7999	1.80807	0.387834	4.66198	3.13179e-06	0.000104601	45.9167	27.1273	113.963	136.193
chr12:16615023-16617765	370.377	0.776629	0.166613	4.66127	3.14258e-06	0.000104889	279.552	267.034	462.669	472.253
chr3:77637851-77639518	200.815	1.0717	0.229921	4.66118	3.14407e-06	0.000104889	130.998	128.007	292.212	252.045
chr20:23821708-23823548	161.235	1.22275	0.262431	4.65931	3.17276e-06	0.000105785	93.184	100.032	199.678	252.045
chr7:51687053-51688339	159.206	1.30939	0.281036	4.65915	3.17512e-06	0.000105802	114.792	70.3614	227.925	223.745
chr11:89386714-89395732	4399.14	-0.266654	0.0572344	-4.65899	3.17772e-06	0.000105816	4753.73	4854.09	3960.45	4028.3
chr2:79587328-79588342	133.704	1.36575	0.293149	4.65889	3.17921e-06	0.000105816	60.7722	87.3159	204.548	182.18
chr5:71124625-71125695	101.698	1.50995	0.32416	4.65805	3.19221e-06	0.000106188	51.3187	54.2546	140.262	160.955
chr12:18810086-18812295	153.516	1.22763	0.263588	4.6574	3.20227e-06	0.000106399	83.7305	99.1841	225.977	205.174
chr8:16739569-16741006	109.533	1.48636	0.319139	4.65741	3.20212e-06	0.000106399	59.4217	55.95	182.145	140.615
chr15:39278507-39280516	171.706	1.13949	0.244715	4.65641	3.21768e-06	0.00010685	106.689	107.661	242.536	229.936
chr21:5805024-5807092	608.209	-0.636001	0.136605	-4.65578	3.22762e-06	0.000107118	779.234	701.918	500.657	451.028
chr14:58452342-58454769	829.592	-0.544574	0.116976	-4.65544	3.23288e-06	0.000107231	1012.87	957.084	640.918	707.495
chr7:51390695-51394604	528.106	0.69792	0.149938	4.65473	3.24402e-06	0.000107538	442.961	365.371	630.204	673.889
chr21:68241447-68243560	864.293	-0.538082	0.115637	-4.6532	3.26817e-06	0.000108276	1077.69	971.496	682.802	725.182
chrX:94758897-94764478	637.678	0.595946	0.128091	4.65253	3.27887e-06	0.000108569	499.682	515.418	762.673	772.938
chr5:57430905-57434377	1526.3	-0.411512	0.0885329	-4.64812	3.34972e-06	0.000110851	1685.41	1798.03	1282.81	1338.93
chr6:58795465-58799384	509.973	0.704119	0.151498	4.64771	3.35639e-06	0.000111008	413.251	364.523	587.346	674.773
chr5:64681844-64683664	179.532	1.18202	0.2544	4.64631	3.37929e-06	0.000111701	97.2354	121.225	278.575	221.092
chr15:64637639-64641337	1671.55	0.404642	0.0870925	4.64612	3.38238e-06	0.000111739	1388.31	1486.07	1971.46	1840.37
chr13:41687375-41690201	1134.64	-0.477891	0.102868	-4.64566	3.38999e-06	0.000111926	1347.79	1295.33	896.117	999.337
chr1:77291979-77294789	198.057	1.12841	0.242905	4.64547	3.39307e-06	0.000111964	126.946	122.073	232.796	310.413
chr3:14975605-14976962	118.648	1.3878	0.298758	4.64524	3.3968e-06	0.000112022	68.8751	62.7318	161.691	181.296
chr4:49802268-49804809	218.035	1.07031	0.230416	4.64511	3.3989e-06	0.000112028	117.493	161.916	300.004	292.726
chr2:133648186-133650367	1029.74	-0.474754	0.102272	-4.64205	3.44962e-06	0.000113634	1181.68	1213.1	861.051	863.144
chr23:27757199-27761851	1182.17	-0.450589	0.0970871	-4.64108	3.46597e-06	0.000114108	1336.99	1392.82	981.832	1017.02
chr16:50521006-50528455	1411.65	0.444721	0.0958379	4.64035	3.47827e-06	0.000114447	1231.65	1162.23	1537.03	1715.68
chr10:7852104-7855987	853.299	0.593899	0.128058	4.63773	3.52258e-06	0.00011579	602.32	753.63	1068.52	988.724
chr3:58739388-58740306	83.6003	1.68815	0.364007	4.6377	3.52311e-06	0.00011579	36.4633	42.3864	114.937	140.615
chr13:57688426-57691323	728.917	0.643228	0.138714	4.63709	3.53342e-06	0.000116063	540.197	596.8	789.946	988.724
chr17:50872886-50879192	2070.3	0.350468	0.075587	4.63662	3.54146e-06	0.000116261	1832.62	1808.2	2316.27	2324.12
chr2:46059488-46063764	2890.62	-0.307019	0.0662353	-4.63529	3.56443e-06	0.000116948	3226.33	3168.81	2574.39	2592.97
chr10:13620764-13627329	1149.41	0.488551	0.105446	4.6332	3.60051e-06	0.000118064	968.303	946.064	1249.69	1433.56
chr5:101863645-101864296	98.4626	1.51397	0.326842	4.63211	3.61951e-06	0.00011862	51.3187	50.8637	142.21	149.458
chr1:6994257-6997728	969.144	0.506819	0.109454	4.63043	3.64914e-06	0.000119451	760.327	838.403	1168.85	1109
chr2:133544636-133546124	80.0665	1.70205	0.367589	4.63032	3.65108e-06	0.000119451	35.1128	39.8432	128.573	116.737
chr28:18001098-18005163	431.193	0.775263	0.167426	4.63047	3.64836e-06	0.000119451	347.077	290.771	586.372	500.553
chr15:51663944-51665178	175.21	1.12443	0.24287	4.62976	3.66085e-06	0.000119702	112.091	108.509	230.847	249.392
chr24:41448447-41451768	470.762	0.747509	0.161524	4.62785	3.69473e-06	0.000120741	321.417	379.782	541.566	640.283
chr5:106004628-106006765	550.629	0.653986	0.141355	4.62656	3.71792e-06	0.00012143	452.415	405.214	650.659	694.229
chr24:25652330-25660783	1830.5	0.368078	0.0795905	4.62464	3.75241e-06	0.000122487	1586.83	1608.99	2071.78	2054.39
chr14:73576482-73581607	1923.63	-0.382013	0.0826695	-4.62096	3.81963e-06	0.000124584	2193.2	2161.71	1587.69	1751.93
chr26:9777663-9780976	642.154	0.598931	0.129614	4.62089	3.82096e-06	0.000124584	534.795	488.291	774.362	771.17
chrX:138905009-138906706	175.903	1.1829	0.256051	4.61979	3.84126e-06	0.000125175	121.544	94.9455	219.159	267.964
chr21:19927978-19929407	160.791	1.19367	0.258394	4.61956	3.84554e-06	0.000125243	94.5345	100.88	204.548	243.201
chr27:26735657-26741710	1205.48	-0.440247	0.0953153	-4.61885	3.85874e-06	0.000125602	1370.75	1404.68	1018.85	1027.64
chr11:85920050-85922437	1557.37	-0.411693	0.0891725	-4.61682	3.89673e-06	0.000126767	1693.52	1859.91	1344.18	1331.86
chr1:49404957-49406720	456.708	0.718287	0.155584	4.6167	3.89894e-06	0.000126767	337.623	352.655	529.878	606.677
chr16:60027961-60031081	938.678	0.509369	0.11036	4.61551	3.92125e-06	0.000127421	811.646	740.066	1076.31	1126.69
chr18:25774354-25778621	1460.05	-0.412173	0.0893286	-4.61412	3.94762e-06	0.000128205	1625.99	1707.32	1226.32	1280.57
chr18:24887657-24890969	1502.7	0.418621	0.0907358	4.61363	3.95702e-06	0.000128438	1326.18	1248.7	1653.92	1782
chr26:9300035-9305384	2884.26	-0.313832	0.0680309	-4.61307	3.96756e-06	0.000128708	3115.59	3275.62	2542.24	2603.58
chr18:11450106-11454122	3124.08	-0.303089	0.0657079	-4.61267	3.97526e-06	0.000128885	3515.33	3388.37	2842.25	2750.39
chr3:26441215-26442713	78.9895	1.69984	0.368531	4.61246	3.97924e-06	0.000128941	35.1128	38.9955	119.807	122.043
chr17:63117569-63118199	5498.21	-0.302694	0.0656369	-4.61165	3.99493e-06	0.000129261	6266.28	5881.53	5218.91	4626.13
chr5:83342748-83344754	182.39	1.09648	0.237767	4.6116	3.99584e-06	0.000129261	110.74	121.225	246.432	251.161
chr8:31429989-31431742	272.917	0.960453	0.208268	4.61162	3.99544e-06	0.000129261	207.976	164.459	329.225	390.007
chr24:37631058-37640065	5542.63	-0.246614	0.0534846	-4.61094	4.0086e-06	0.000129601	5913.81	6113.81	5072.8	5070.09
chr5:79956891-79959755	404.152	0.821459	0.178174	4.61043	4.01832e-06	0.000129842	259.295	322.984	466.565	567.765
chr13:10721109-10725288	629.288	0.594368	0.128927	4.61011	4.02452e-06	0.00012997	506.435	496.768	767.543	746.407
chr21:30366756-30369460	2153.54	-0.415888	0.0902203	-4.60969	4.03269e-06	0.00013016	2414.68	2506.73	2013.34	1679.42
chr2:29923050-29925422	341.495	0.843475	0.183006	4.60899	4.04629e-06	0.000130526	241.738	246.689	483.124	394.428
chr11:43689681-43693965	881.11	0.512901	0.111333	4.60691	4.08703e-06	0.000131767	702.256	748.543	1025.66	1047.98
chr18:16971013-16973812	480.08	0.73616	0.159813	4.60639	4.09719e-06	0.000131999	317.366	400.127	625.334	577.493
chr7:38813856-38817849	2141.3	-0.362776	0.0787565	-4.60631	4.09883e-06	0.000131999	2513.27	2308.36	1844.83	1898.74
chr1:66962159-66966743	758.615	-0.551076	0.119639	-4.60616	4.10165e-06	0.000132016	868.367	934.196	604.879	627.017
chr11:74090922-74095732	1312.42	-0.424301	0.0921227	-4.60582	4.10836e-06	0.000132158	1476.09	1531	1122.09	1120.5
chr15:37886958-37891732	1255.28	-0.517284	0.112321	-4.60539	4.11697e-06	0.000132361	1593.58	1365.69	945.793	1116.07
chr1:119948804-119951971	2589.61	-0.32439	0.0704844	-4.60229	4.17874e-06	0.000134272	2900.86	2859.39	2242.24	2355.96
chr16:27131857-27133689	137.074	1.31733	0.286322	4.60087	4.20735e-06	0.000135116	74.2771	82.2296	221.107	170.683
chr5:32382417-32385460	458.791	0.720746	0.156666	4.60053	4.21411e-06	0.000135258	378.138	317.05	576.632	563.343
chr18:50032754-50038636	2117.22	0.366892	0.0797664	4.59958	4.23353e-06	0.000135805	1755.64	1938.75	2399.06	2375.41
chr19:9355468-9359485	839.019	0.538229	0.117025	4.59926	4.23988e-06	0.000135933	645.535	720.568	1019.82	970.152
chr14:57457271-57457901	144.008	1.27344	0.276907	4.59879	4.24945e-06	0.000136164	74.2771	93.25	220.133	188.371
chr3:77075949-77077859	292.42	0.862651	0.187593	4.59852	4.25508e-06	0.000136269	214.728	200.911	371.109	382.932
chr14:12764297-12769251	1835.86	0.379511	0.0825458	4.59758	4.27432e-06	0.000136809	1581.43	1609.83	1998.73	2153.44
chr3:103980285-103981505	107.5	1.44722	0.314916	4.59559	4.31535e-06	0.000138046	63.4731	52.5591	153.898	160.071
chr9:83037930-83039764	183.681	1.11755	0.243269	4.59388	4.35089e-06	0.000139105	129.647	103.423	242.536	259.12
chr22:17777336-17782928	1444.38	-0.403625	0.087882	-4.5928	4.37332e-06	0.000139745	1644.9	1645.44	1233.13	1254.03
chr5:43899490-43900320	177.813	1.15518	0.25153	4.59261	4.37744e-06	0.000139799	124.245	97.4887	225.977	263.542
chr2:88914711-88918575	1001.97	0.477033	0.103883	4.59202	4.38987e-06	0.000140118	842.707	833.316	1150.34	1181.52
chr6:106554753-106555688	121.565	1.51878	0.330912	4.58966	4.43967e-06	0.000141629	64.8236	61.0364	225.977	134.424
chr1:73224925-73229883	2424.99	-0.345824	0.075372	-4.58823	4.47014e-06	0.000142522	2646.96	2778.85	2218.86	2055.27
chr20:4460343-4462692	238.722	0.956912	0.208565	4.58807	4.47358e-06	0.000142553	152.606	171.241	312.667	318.373
chr15:75819542-75821845	541.863	0.701324	0.152885	4.58726	4.49101e-06	0.000143029	359.231	462.859	675.01	670.351
chr11:38598572-38600433	129.199	1.30019	0.283516	4.58594	4.51953e-06	0.000143779	75.6276	73.7523	177.275	190.139
chr9:21781239-21784350	420.239	0.777712	0.169583	4.58602	4.51786e-06	0.000143779	275.5	341.634	498.708	565.112
chr28:19042235-19044532	472.544	0.689867	0.150459	4.58509	4.53797e-06	0.000144206	340.324	381.477	587.346	581.03
chr8:88726806-88727851	88.9168	1.62001	0.353319	4.58511	4.53746e-06	0.000144206	36.4633	50.0159	128.573	140.615
chr1:58516231-58517281	100.021	1.53845	0.335562	4.58468	4.54688e-06	0.000144409	52.6692	50.0159	127.599	169.799
chr9:85831863-85832672	50.8848	2.175	0.474455	4.58421	4.55697e-06	0.00014465	16.2059	20.3455	84.7415	82.2463
chr22:29433123-29435469	1078.97	0.49141	0.107208	4.5837	4.56827e-06	0.000144929	867.016	924.871	1335.41	1188.59
chr22:55605101-55606853	216.617	1.02137	0.222859	4.58303	4.58295e-06	0.000145314	156.657	130.55	278.575	300.685
chr3:16546235-16547557	168.883	1.16537	0.254297	4.58272	4.58961e-06	0.000145446	91.8335	115.291	246.432	221.977
chr19:47604567-47605968	188.23	1.08145	0.235991	4.58259	4.59255e-06	0.000145458	129.647	112.748	262.017	248.508
chr21:20768315-20769163	61.7497	1.96907	0.429702	4.58242	4.59626e-06	0.000145496	29.7108	21.1932	93.5078	102.587
chr26:47282741-47284214	213.013	1.03169	0.225175	4.58175	4.61108e-06	0.000145885	126.946	151.743	300.978	272.386
chr19:18511303-18515839	747.099	-0.54484	0.118957	-4.58013	4.64684e-06	0.000146935	904.83	868.921	600.009	614.636
chr29:10007479-10012281	1554.23	-0.397876	0.0868776	-4.57973	4.65584e-06	0.000147139	1721.88	1810.75	1366.58	1317.71
chr14:55211382-55213821	460.441	-0.690995	0.150937	-4.57805	4.69338e-06	0.000148195	545.599	590.866	360.395	344.904
chr2:120725625-120728558	862.232	-0.525226	0.114728	-4.578	4.6944e-06	0.000148195	975.055	1058.81	682.802	732.257
chr21:20614031-20620166	1174.18	0.467608	0.102159	4.57727	4.71082e-06	0.000148632	942.644	1025.75	1422.1	1306.21
chr2:103921893-103925787	1055.28	0.475469	0.103884	4.57692	4.71883e-06	0.000148722	911.582	856.205	1192.22	1261.11
chr3:2535385-2539126	2036.69	-0.351674	0.0768363	-4.57692	4.71871e-06	0.000148722	2259.37	2307.51	1757.17	1822.68
chr6:86322833-86325431	362.601	0.834593	0.182395	4.57575	4.74506e-06	0.000149467	291.706	231.43	494.812	432.456
chr8:76881851-76882888	61.5438	2.03007	0.443804	4.57424	4.77944e-06	0.000150467	29.7108	19.4977	83.7674	113.199
chr7:17958328-17962743	1126.34	0.462133	0.101038	4.57384	4.78863e-06	0.000150674	904.83	987.603	1312.03	1300.91
chr15:76755546-76758447	535.818	0.63895	0.139702	4.57366	4.79269e-06	0.00015072	432.158	406.909	650.659	653.548
chr12:11733975-11736407	410.54	0.735507	0.160881	4.57175	4.83678e-06	0.000152023	309.263	306.877	539.618	486.403
chr12:19655520-19660428	2878.03	-0.310892	0.0680098	-4.57128	4.84746e-06	0.000152276	3104.78	3266.29	2595.82	2545.21
chr3:49794305-49810123	3060.93	0.301617	0.0660112	4.56918	4.89631e-06	0.000153727	2790.12	2696.62	3328.29	3428.7
chr5:5493926-5498543	2045.94	0.348205	0.0762174	4.56858	4.91039e-06	0.000154084	1790.75	1809.05	2318.21	2265.75
chr1:112776475-112777740	91.2469	1.69406	0.370848	4.56808	4.92201e-06	0.000154365	55.3702	32.2136	121.755	155.649
chr4:107647889-107648999	60.8764	1.947	0.426321	4.56699	4.94778e-06	0.000155089	25.6594	24.5841	91.5598	101.702
chr6:59772071-59773814	375.02	0.755195	0.165439	4.56479	4.99989e-06	0.000156637	272.799	284.836	467.539	474.906
chr25:24980431-24981546	137.509	1.31541	0.288188	4.56444	5.00831e-06	0.000156815	86.4315	72.0568	170.457	221.092
chr3:16230616-16233985	1750.14	-0.403872	0.0884977	-4.56364	5.02744e-06	0.000157329	2017.64	1969.27	1601.32	1412.34
chr18:8346738-8348390	271.74	0.920845	0.201791	4.56336	5.03415e-06	0.000157368	172.863	201.759	331.174	381.163
chr5:57101336-57104597	2094.39	-0.343155	0.0751962	-4.56347	5.0316e-06	0.000157368	2340.4	2343.97	1864.31	1828.87
chr19:61799964-61801238	184.584	1.09616	0.240359	4.56052	5.1027e-06	0.000159424	105.338	128.855	250.328	253.814
chr20:7252734-7254522	400.736	0.770038	0.168867	4.56004	5.11439e-06	0.000159703	267.397	322.984	527.93	484.634
chr11:66411600-66414186	972.782	0.483167	0.10597	4.55947	5.12826e-06	0.000160049	800.842	821.448	1109.43	1159.41
chr19:46110776-46113994	568.344	0.616959	0.135355	4.55808	5.16222e-06	0.000161021	452.415	445.057	699.361	676.542
chr14:64219631-64223385	2394.04	0.343374	0.0753738	4.55561	5.22331e-06	0.000162839	2164.84	2059.13	2584.13	2768.07
chr25:37474284-37477827	735.807	-0.581113	0.127577	-4.55498	5.23904e-06	0.000163241	860.264	903.678	542.54	636.745
chr29:45174816-45176503	112.417	1.4191	0.311612	4.55407	5.2619e-06	0.000163864	66.1741	56.7977	148.054	178.642
chrX:127840833-127842357	236.665	0.966994	0.212344	4.5539	5.26605e-06	0.000163905	159.358	161.068	289.29	336.944
chr11:60951195-60955906	2434.91	0.328744	0.0721937	4.55363	5.27269e-06	0.000164023	2172.94	2144.75	2775.04	2646.92
chr4:44317008-44319259	588.734	0.631378	0.138663	4.55334	5.28018e-06	0.000164164	437.56	484.9	679.88	752.598
chr5:36218153-36219803	224.255	0.985487	0.216437	4.55323	5.28292e-06	0.000164164	141.802	158.525	285.394	311.298
chr22:10050297-10053377	1585.59	-0.394557	0.0866591	-4.55298	5.28911e-06	0.000164268	1743.49	1856.52	1391.9	1350.43
chr23:25706810-25710342	391.216	0.787913	0.173076	4.55241	5.30359e-06	0.000164629	317.366	258.557	521.111	467.831
chr20:62669658-62684261	1721.81	0.384169	0.0844151	4.55095	5.34049e-06	0.000165662	1499.05	1489.46	1877.95	2020.78
chr21:26492001-26497727	3052.83	0.300389	0.0660071	4.55086	5.34265e-06	0.000165662	2775.26	2699.16	3311.74	3425.16
chr4:117570835-117575212	3796.92	-0.29215	0.0642009	-4.55056	5.3504e-06	0.000165813	4024.47	4331.04	3472.45	3359.72
chr25:19943191-19945910	695.802	0.609199	0.133897	4.54977	5.37044e-06	0.000166345	573.959	529.83	768.517	910.9
chr15:44318775-44321007	607.417	-0.597788	0.131413	-4.54892	5.39222e-06	0.00016693	719.812	742.609	496.76	470.484
chr3:77813180-77815616	638.906	0.584616	0.128574	4.54691	5.44394e-06	0.00016844	526.692	496.768	763.647	768.516
chr11:102438541-102440211	234.415	0.973785	0.214248	4.54513	5.49003e-06	0.000169684	145.853	169.546	294.16	328.101
chr5:57522359-57525846	606.007	0.636361	0.140006	4.54524	5.48736e-06	0.000169684	459.167	489.139	678.906	796.816
chr19:17636145-17639389	723.215	0.560359	0.123323	4.54383	5.52424e-06	0.00017065	588.815	580.693	823.064	900.287
chr12:32060190-32061511	206.289	1.03622	0.228069	4.54343	5.53459e-06	0.000170878	125.596	144.114	260.069	295.379
chr16:80447549-80448440	89.6905	1.58911	0.349818	4.54269	5.55403e-06	0.000171294	37.8138	50.8637	138.314	131.771
chr25:2437227-2442421	4266.56	-0.273527	0.0602119	-4.54274	5.55289e-06	0.000171294	4810.45	4532.8	3898.11	3824.89
chr12:75915331-75917907	418.126	0.715396	0.157504	4.54208	5.57024e-06	0.000171702	313.314	319.593	504.553	535.043
chr10:80185069-80188378	516.662	0.644231	0.141861	4.54128	5.59126e-06	0.000172074	411.9	395.041	637.996	621.711
chr17:14557035-14558155	196.925	1.07835	0.23745	4.54139	5.58857e-06	0.000172074	144.503	110.205	265.913	267.079
chr3:49846272-49858294	3130.89	-0.292219	0.064345	-4.54144	5.58711e-06	0.000172074	3423.5	3469.75	2790.62	2839.71
chr4:80696557-80699710	975.044	0.487928	0.107448	4.54107	5.59707e-06	0.000172161	775.183	846.032	1142.55	1136.41
chr4:25091961-25095726	1778.79	0.371282	0.0817687	4.54064	5.60837e-06	0.000172416	1527.41	1573.38	2048.41	1965.95
chr7:53885357-53889872	468.21	0.691501	0.15235	4.53889	5.65509e-06	0.00017376	361.932	354.35	612.671	543.887
chr3:23148851-23152267	631.738	-0.583066	0.128468	-4.53862	5.66249e-06	0.000173894	764.379	751.087	516.241	495.246
chr21:64985609-64992685	2806.82	-0.317227	0.06991	-4.53765	5.68842e-06	0.000174505	3110.18	3118.79	2409.77	2588.55
chr4:8175106-8178238	1342.93	-0.419801	0.0925149	-4.53766	5.68826e-06	0.000174505	1496.35	1575.93	1172.74	1126.69
chr7:21085582-21089654	3016.1	-0.305968	0.0674442	-4.53661	5.71645e-06	0.000175271	3273.59	3393.45	2767.25	2630.11
chr1:89961489-89965016	254.369	1.08156	0.238464	4.53555	5.74538e-06	0.000176064	203.924	125.464	317.537	370.55
chr13:17554502-17556907	131.792	2.79827	0.616998	4.53529	5.75249e-06	0.000176188	48.6177	18.65	230.847	229.051
chr22:10611783-10613865	201.419	1.15702	0.255134	4.53497	5.76127e-06	0.000176363	94.5345	152.591	264.939	293.61
chr21:68391999-68396362	432.731	0.704608	0.155448	4.53275	5.82219e-06	0.000178134	314.665	342.482	539.618	534.159
chr10:67570158-67571620	232.356	0.956956	0.211164	4.53183	5.84762e-06	0.000178716	159.358	156.83	292.212	321.026
chr2:27548589-27550998	361.645	0.835548	0.184369	4.53193	5.84481e-06	0.000178716	249.841	268.73	522.085	405.925
chr6:36428451-36431114	677.641	0.574015	0.126666	4.53172	5.85053e-06	0.000178716	518.589	568.825	820.142	803.007
chr29:32498215-32505298	3753.21	-0.289372	0.0638752	-4.53028	5.8907e-06	0.000179847	3977.2	4275.09	3414.98	3345.57
chr8:58279951-58282557	344.788	0.783811	0.173072	4.52881	5.93172e-06	0.000181004	263.346	244.146	438.318	433.341
chr17:54188072-54190959	1024.44	0.494754	0.109307	4.5263	6.0026e-06	0.00018307	825.151	874.007	1270.15	1128.45
chr5:65633970-65638945	1313.4	0.462755	0.102246	4.52592	6.01329e-06	0.000183299	1020.97	1184.28	1468.85	1579.48
chr23:50862521-50864251	600.404	-0.606709	0.134112	-4.5239	6.07107e-06	0.000184962	715.761	733.284	500.657	451.912
chr18:25630015-25631124	101.869	1.46411	0.323801	4.52163	6.13656e-06	0.000186859	51.3187	56.7977	139.288	160.071
chr18:63520323-63526868	2843.67	-0.300712	0.0665194	-4.52066	6.16473e-06	0.000187617	3126.39	3151	2562.7	2534.6
chr18:43462507-43475934	2603.37	0.318497	0.0704612	4.52018	6.17884e-06	0.000187947	2260.72	2371.09	2858.81	2922.84
chr26:10910348-10912042	219.707	1.02329	0.226432	4.5192	6.20743e-06	0.000188707	128.297	160.221	273.705	316.604
chr8:23851867-23854320	438.804	0.695835	0.153976	4.5191	6.21038e-06	0.000188707	326.819	342.482	556.177	529.737
chr9:102191702-102196209	547.058	0.65022	0.14389	4.51888	6.21688e-06	0.000188805	417.302	434.037	621.437	715.454
chr12:31695209-31698118	444.061	0.825451	0.182676	4.51867	6.2229e-06	0.000188888	259.295	378.087	535.722	603.139
chr13:64477486-64478622	141.526	1.23743	0.273872	4.51828	6.2345e-06	0.000189114	93.184	76.2955	196.756	199.867
chr15:20587532-20589130	117.781	1.38302	0.3061	4.5182	6.23689e-06	0.000189114	72.9266	58.4932	154.872	184.833
chr11:63881314-63885151	3012.88	0.311243	0.0688947	4.51766	6.2528e-06	0.000189496	2588.89	2784.79	3390.63	3287.2
chr3:107040032-107043014	1048.27	0.458597	0.101535	4.51666	6.28235e-06	0.000190291	876.47	889.266	1207.81	1219.54
chr28:34608936-34615130	4328.32	-0.269919	0.0597708	-4.51589	6.30506e-06	0.000190879	4657.85	4804.92	3823.11	4027.42
chr6:24004114-24008980	1118.24	0.479367	0.106177	4.51479	6.33804e-06	0.000191776	876.47	988.45	1354.89	1253.15
chr7:30919731-30923975	1624.04	0.40768	0.0903247	4.51349	6.37696e-06	0.000192853	1412.61	1380.95	1745.48	1957.11
chr23:17601913-17608296	1090.62	0.468203	0.103739	4.51329	6.38289e-06	0.000192931	903.479	926.566	1205.86	1326.55
chr25:27500337-27503981	1451.53	-0.400108	0.0886558	-4.51305	6.39018e-06	0.00019305	1680.01	1624.25	1229.24	1272.61
chr10:91924207-91925951	344.104	0.827776	0.183541	4.51004	6.4814e-06	0.000195703	232.285	262.796	399.356	481.981
chr19:36267728-36269380	177.559	1.1091	0.245987	4.50877	6.52031e-06	0.000196775	106.689	117.834	223.055	262.658
chr28:25261279-25263208	239.628	0.94576	0.209784	4.50825	6.53649e-06	0.00019716	156.657	170.393	298.056	333.407
chr12:49722137-49724396	597.766	0.656983	0.145773	4.5069	6.57805e-06	0.000198309	505.084	425.559	675.984	784.435
chr8:22197591-22204263	678.445	0.579816	0.128667	4.50634	6.59563e-06	0.000198735	534.795	552.718	767.543	858.722
chr7:101843941-101845103	60.0018	1.96913	0.437047	4.50554	6.62047e-06	0.000199379	20.2574	27.975	104.222	87.5525
chr6:105215418-105220176	913.606	0.517851	0.114948	4.50508	6.63492e-06	0.00019971	727.915	773.128	1142.55	1010.83
chr21:5437655-5438536	57.6095	2.22629	0.494594	4.50124	6.75587e-06	0.000203245	9.45345	29.6705	89.6117	101.702
chr8:81406417-81407255	70.9738	1.77764	0.394994	4.50044	6.78137e-06	0.000203905	27.0098	36.4523	108.118	112.315
chr4:44267013-44268237	134.802	1.25102	0.278054	4.49922	6.82035e-06	0.00020497	76.9781	82.2296	198.704	181.296
chr15:22127105-22128782	196.981	1.13547	0.252393	4.49883	6.83281e-06	0.000205237	148.554	100.032	248.38	290.957
chr13:63928634-63936031	2180.91	0.337056	0.0749248	4.49859	6.84048e-06	0.000205361	1883.94	1968.42	2441.92	2429.36
chr5:97745329-97752863	2398.74	0.349	0.0775892	4.49805	6.85781e-06	0.000205774	1991.98	2222.74	2715.62	2664.6
chr4:65423657-65426673	437.793	0.69684	0.154948	4.49725	6.88389e-06	0.000206449	334.922	333.157	563.969	519.124
chr8:83302977-83306234	225.831	0.954646	0.212316	4.49635	6.91292e-06	0.000207211	151.255	155.982	298.056	298.032
chr20:40329351-40330157	80.2256	1.67836	0.373284	4.4962	6.918e-06	0.000207256	39.1643	37.3	138.314	106.124
chr10:30018490-30024882	2171.38	-0.340784	0.075801	-4.49577	6.93177e-06	0.000207452	2451.14	2402.46	1968.53	1863.36
chr20:70986775-70991051	1532.32	-0.387649	0.0862241	-4.49583	6.9299e-06	0.000207452	1717.83	1755.64	1307.16	1348.66
chr22:12501284-12507688	1518.63	0.390117	0.0867875	4.49508	6.95438e-06	0.000207913	1327.53	1302.11	1751.32	1693.57
chr3:86246595-86249816	1316.49	0.438647	0.097583	4.49511	6.95327e-06	0.000207913	1096.6	1138.5	1432.81	1598.05
chr1:77041119-77043737	421.38	0.745213	0.165822	4.49406	6.98775e-06	0.000208762	311.964	317.898	477.28	578.377
chr17:65267981-65272441	454.646	0.679207	0.151137	4.49399	6.99004e-06	0.000208762	349.778	349.264	575.658	543.887
chr7:40357690-40358331	153.103	1.16257	0.258721	4.49354	7.00478e-06	0.000209094	93.184	95.7932	209.419	214.017
chr11:92838611-92840690	415.517	0.709658	0.157935	4.49334	7.01134e-06	0.000209099	307.912	322.136	527.93	504.09
chr8:22344555-22347694	1874.27	-0.357661	0.0795985	-4.49332	7.01222e-06	0.000209099	2131.08	2080.32	1674.37	1611.32
chr21:40192202-40193639	191.911	1.19656	0.266321	4.49291	7.02552e-06	0.000209387	124.245	109.357	325.329	208.711
chr3:30728089-30729540	114.163	1.40424	0.312751	4.48996	7.1236e-06	0.000212201	54.0197	70.3614	150.976	181.296
chr8:63240177-63244167	338.866	0.785498	0.174952	4.48979	7.12923e-06	0.000212259	248.491	249.232	412.019	445.722
chr26:17388029-17389421	121.825	1.36959	0.305146	4.48831	7.17898e-06	0.000213629	75.6276	61.0364	196.756	153.88
chr5:70655853-70659378	1001.34	0.467094	0.104121	4.48607	7.25485e-06	0.000215776	841.357	840.098	1140.6	1183.29
chr28:15570129-15572791	480.679	0.658278	0.146742	4.48596	7.25865e-06	0.000215777	367.334	378.087	578.58	598.718
chr29:24856433-24859747	500.738	-0.644065	0.143634	-4.48406	7.32368e-06	0.000217598	596.918	623.928	397.408	384.7
chr14:16803531-16804297	73.671	1.71092	0.38167	4.48273	7.36947e-06	0.000218845	35.1128	33.9091	116.885	108.777
chr14:36429584-36432223	432.556	0.697584	0.155644	4.48193	7.39709e-06	0.000219552	314.665	344.177	532.8	538.581
chr29:8925956-8929396	342.456	0.773158	0.172547	4.48085	7.4348e-06	0.000220558	251.192	254.318	435.396	428.919
chr19:53844204-53846312	286.919	0.950859	0.212217	4.48061	7.44307e-06	0.00022066	166.111	222.952	420.785	337.829
chr6:68933886-68937669	694.154	0.603205	0.134628	4.48053	7.44589e-06	0.00022066	602.32	502.702	875.662	795.932
chr10:82727808-82732090	1657.19	-0.377744	0.0843186	-4.47996	7.46569e-06	0.000221133	1836.67	1908.23	1411.38	1472.47
chr21:65215772-65218192	576.275	-0.646697	0.144408	-4.47828	7.52479e-06	0.000222654	757.626	650.207	476.306	420.959
chr3:93906818-93908116	71.591	1.74782	0.390285	4.47832	7.52342e-06	0.000222654	29.7108	35.6046	105.196	115.852
chr12:15466997-15467665	89.983	1.56902	0.350386	4.47799	7.53477e-06	0.000222812	45.9167	44.9296	117.859	151.227
chr2:132199953-132201333	127.512	1.31569	0.293818	4.47791	7.53787e-06	0.000222812	76.9781	69.5137	202.6	160.955
chr19:39749757-39753699	588.198	0.656312	0.146619	4.47631	7.59437e-06	0.000224367	405.148	505.246	691.568	750.829
chr23:32842757-32845662	1132.47	-0.515805	0.115272	-4.47469	7.65234e-06	0.000225964	1449.08	1219.88	866.896	994.03
chr22:55789004-55791327	685.765	0.586123	0.130996	4.47437	7.66362e-06	0.000226181	510.486	584.084	787.998	860.491
chr8:40538255-40545478	1939.42	-0.366248	0.0818947	-4.47218	7.74267e-06	0.000228397	2154.04	2214.26	1618.85	1770.51
chr14:61681618-61685167	2437.38	-0.343469	0.0768262	-4.47073	7.79538e-06	0.000229834	2746.9	2705.1	2261.72	2035.82
chr1:145158860-145161233	549.425	-0.62897	0.140693	-4.47052	7.80308e-06	0.000229943	676.597	658.684	405.201	457.219
chr9:34688102-34688794	43.1362	2.33101	0.521491	4.46989	7.82603e-06	0.000230502	16.2059	12.7159	71.1049	72.5182
chr10:76128672-76132453	959.541	0.504907	0.112962	4.46971	7.83258e-06	0.000230548	776.533	809.58	1051.96	1200.09
chr3:55014558-55018233	747.638	0.566041	0.126642	4.46963	7.83563e-06	0.000230548	646.886	561.196	927.286	855.185
chr3:27053902-27058270	1439.55	-0.40931	0.0915988	-4.46851	7.87678e-06	0.000231579	1694.87	1592.03	1195.15	1276.14
chr3:55882035-55883511	430.891	-0.705252	0.157829	-4.46845	7.87871e-06	0.000231579	526.692	541.698	305.849	349.326
chr11:89377943-89383871	1190.03	-0.443214	0.0992078	-4.46754	7.91251e-06	0.000232336	1312.68	1428.42	989.625	1029.41
chr23:35401240-35405038	1700.45	-0.380259	0.0851152	-4.46758	7.91088e-06	0.000232336	1871.78	1973.51	1431.84	1524.65
chr1:6867616-6868418	85.5294	1.59788	0.357743	4.46657	7.9485e-06	0.000233228	37.8138	46.625	118.833	138.846
chr3:23741085-23744798	2759.21	-0.356649	0.0798499	-4.4665	7.95101e-06	0.000233228	2907.61	3285.79	2312.37	2531.06
chr5:48517727-48520655	933.899	0.499328	0.111933	4.46094	8.16008e-06	0.000239239	725.214	819.753	1086.05	1104.58
chr1:44241914-44253427	4425.57	-0.263314	0.0590309	-4.46061	8.17269e-06	0.000239487	4695.66	4957.51	3991.62	4057.48
chr10:99162431-99164011	222.062	1.03359	0.231823	4.45855	8.2516e-06	0.000241676	168.812	124.616	274.679	320.141
chr5:80186303-80189859	1588.15	0.377907	0.0847654	4.45827	8.26234e-06	0.000241868	1384.25	1378.41	1818.53	1771.39
chr5:46185913-46187121	271.826	0.868188	0.194754	4.45787	8.2778e-06	0.000242197	187.718	196.673	363.317	339.598
chr11:98656782-98658179	229.3	-1.0434	0.234079	-4.45749	8.29261e-06	0.000242507	302.51	315.355	119.807	179.527
chr5:112594255-112599110	2484.03	-0.358514	0.0804734	-4.45506	8.38716e-06	0.000245148	2799.57	2783.94	2024.05	2328.54
chr19:49633871-49636480	664.06	0.633429	0.142214	4.45407	8.42576e-06	0.000246037	480.775	557.805	885.402	732.257
chr5:68810648-68812321	249.557	0.906701	0.203567	4.45406	8.42612e-06	0.000246037	171.513	175.48	339.94	311.298
chr23:31373173-31375220	212.414	0.988062	0.221907	4.45261	8.48344e-06	0.000247585	152.606	133.093	275.653	288.304
chr10:51244542-51245857	74.2332	1.70561	0.38313	4.45179	8.51564e-06	0.000248399	37.8138	32.2136	120.781	106.124
chr13:81521717-81523335	206.944	-1.04922	0.235699	-4.45154	8.52582e-06	0.000248444	311.964	246.689	147.08	122.043
chr16:51926615-51931270	2112.26	0.339084	0.0761711	4.45162	8.52259e-06	0.000248444	1859.63	1870.09	2414.64	2304.66
chr8:73658122-73660138	433.685	-0.697072	0.156618	-4.45078	8.55593e-06	0.000249195	519.94	552.718	313.641	348.441
chr28:9405374-9408372	974.043	-0.490868	0.110301	-4.45027	8.5762e-06	0.000249659	1080.39	1194.45	781.18	840.15
chr22:19620442-19623216	778.313	-0.521453	0.117204	-4.4491	8.62306e-06	0.000250897	938.592	896.896	651.633	626.133
chr18:56043863-56047525	2339.26	-0.321056	0.0721957	-4.44702	8.70684e-06	0.000253206	2564.58	2631.35	2066.91	2094.19
chr1:10860329-10861831	324.559	0.824716	0.185474	4.44653	8.72677e-06	0.000253658	253.893	216.171	388.642	439.531
chr11:101306635-101308353	83.3808	1.6541	0.372016	4.44632	8.7354e-06	0.000253781	31.0613	48.3205	118.833	135.308
chr18:2334780-2335664	68.9152	1.76159	0.396231	4.44585	8.7544e-06	0.000254204	32.4118	30.5182	101.3	111.43
chr5:87101204-87103091	633.337	-0.582601	0.13107	-4.44497	8.7905e-06	0.000254995	738.719	779.909	484.098	530.621
chrX:129815458-129816305	48.7673	2.15759	0.485388	4.44507	8.78617e-06	0.000254995	18.9069	16.9546	86.6896	72.5182
chr15:13936661-13941228	763.675	0.532389	0.119789	4.44438	8.81441e-06	0.000255379	602.32	645.121	879.558	927.703
chr18:7628105-7631656	478.778	0.653454	0.147031	4.44432	8.81705e-06	0.000255379	374.086	370.457	572.735	597.833
chr3:16312449-16314689	358.48	0.756031	0.170105	4.44448	8.8103e-06	0.000255379	255.243	277.207	445.136	456.334
chr16:53610514-53612646	810.547	-0.508203	0.114357	-4.444	8.83017e-06	0.000255631	971.004	933.348	670.139	667.698
chr11:21635934-21638702	134.01	1.23722	0.278421	4.44372	8.84181e-06	0.000255839	83.7305	76.2955	193.834	182.18
chr8:8158774-8159934	10303.2	-0.199969	0.045008	-4.44297	8.87266e-06	0.000256603	11161.8	10873.8	9556.31	9621.05
chr1:78068385-78077404	2447.35	0.313616	0.0705985	4.44225	8.90215e-06	0.000257327	2181.05	2183.75	2698.09	2726.51
chr7:37090510-37093243	1047.08	0.483232	0.108813	4.44096	8.95579e-06	0.000258747	831.903	912.155	1285.73	1158.52
chr3:30097174-30100324	905.755	0.490245	0.110428	4.43952	9.01607e-06	0.000260358	733.317	772.28	1030.53	1086.89
chr7:81400419-81403557	1065.59	-0.453328	0.102128	-4.43882	9.04552e-06	0.000261078	1191.13	1270.74	901.961	898.519
chr8:105764706-105767182	841.818	-0.527851	0.118944	-4.43782	9.08726e-06	0.000262151	1065.54	924.871	690.594	686.27
chr2:133455704-133457207	127.862	1.32254	0.298025	4.43768	9.09342e-06	0.000262198	79.679	66.9705	206.496	158.302
chr22:51763714-51767238	616.672	0.606356	0.136655	4.43714	9.11599e-06	0.000262717	452.415	523.048	770.466	720.76
chr21:21256007-21257408	235.179	0.989151	0.22295	4.43665	9.13715e-06	0.000263117	176.914	139.875	283.446	340.482
[truncated: 55,582 more rows]

## Sheet: POL2RA IFNG 2h vs UT
coordinates	baseMean	log2FoldChange	lfcSE	stat	pvalue	padj	MDBK_UT_POL2RA_R1	MDBK_UT_POL2RA_R2	MDBK_IFNG_2h_POL2RA_R1	MDBK_IFNG_2h_POL2RA_R2
chr7:21927528-21950456	16317.4	4.34384	0.0570297	76.1681	0	0	1501.67	1557.87	31844.5	30365.5
chr23:28655518-28666660	8694.2	1.98403	0.0562523	35.2702	1.68012e-272	3.39022e-268	3429.41	3583.81	13629.4	14134.2
chr23:7173560-7191063	4033.04	2.53051	0.0729573	34.6848	1.3369e-263	1.79844e-259	1238	1146.53	6949.1	6798.52
chr10:20974313-20994137	3410.4	2.53824	0.075977	33.408	1.05021e-244	1.05958e-240	1027.38	978.692	5840.69	5794.84
chr23:25684095-25696215	2372.99	2.65822	0.0935874	28.4036	1.82567e-177	1.47358e-173	664.016	635.913	3895.14	4296.89
chr18:25008656-25029637	2497.8	2.45056	0.0881685	27.7941	5.11474e-170	3.44026e-166	789.424	757.659	4065.79	4378.32
chr3:102026746-102037522	2324.88	2.02122	0.0843392	23.9654	6.38616e-127	3.68181e-123	913.224	924.32	3750.25	3711.73
chr25:9554876-9567016	1767.94	2.45644	0.103501	23.7336	1.622e-124	8.18238e-121	514.492	572.085	3119.97	2865.23
chr23:25720979-25729964	1385.23	2.56659	0.11306	22.7011	4.36649e-114	1.95798e-110	373.007	424.336	2321.47	2422.09
chr21:65240246-65269460	6012.96	3.09266	0.14102	21.9306	1.32711e-106	5.3558e-103	1389.13	1138.26	10748.5	10776
chr23:28713064-28723178	5732.29	1.32078	0.0603099	21.8999	2.60211e-106	9.54666e-103	3350.63	3207.93	8131.57	8239.03
chr2:79545797-79557859	1663.36	2.1489	0.0995964	21.5761	3.01286e-103	1.01325e-99	617.391	607.545	2634.59	2793.9
chr2:120720300-120742244	3556.05	1.73169	0.0841953	20.5675	5.36572e-94	1.66573e-90	1697.82	1595.69	5853.57	5077.11
chr18:55483180-55508546	3169.88	1.67153	0.0821605	20.3447	5.17531e-92	1.49186e-88	1631.9	1404.21	4814.39	4829.03
chr7:61739919-61752505	1702.99	1.8779	0.0958701	19.588	1.95866e-85	5.26971e-82	750.837	708.015	2677.25	2675.85
chr21:65233562-65239869	897.799	2.84946	0.150902	18.8828	1.57988e-79	3.98496e-76	250.815	190.301	1671.07	1479.01
chr7:61752884-61756933	2017.62	1.92088	0.102824	18.6812	7.03644e-78	1.67041e-74	795.855	887.678	2957.37	3429.56
chr29:50694331-50703903	2372.37	1.52836	0.0820491	18.6274	1.92608e-77	4.31837e-74	1217.1	1225.73	3463.69	3582.95
chr7:43585535-43610780	4895.91	1.12932	0.0626441	18.0275	1.18436e-72	2.51565e-69	3088.56	3055.46	6832.39	6607.25
chr19:7726357-7741085	1908.97	1.6585	0.0926348	17.9037	1.10396e-71	2.22763e-68	958.242	881.768	2833.41	2962.44
chr23:25713750-25720388	926.188	2.25569	0.131671	17.1312	8.67947e-66	1.66799e-62	313.519	327.413	1458.56	1605.26
chr23:28542542-28551253	1938.32	1.59012	0.0947131	16.7888	2.94704e-63	5.40609e-60	914.831	1015.33	2807.65	3015.46
chr6:36354566-36367129	1315.39	1.83467	0.111869	16.4002	1.90679e-60	3.34575e-57	528.962	619.365	2079.98	2033.24
chr2:120673849-120678038	1146.22	1.85511	0.115331	16.0851	3.24773e-58	5.46119e-55	500.022	492.892	1864.26	1727.72
chr1:67010872-67017871	1016.1	1.94546	0.124161	15.6689	2.46948e-55	3.98644e-52	451.788	388.876	1597.01	1626.72
chr18:11839820-11851901	1055.96	1.83135	0.117404	15.5986	7.43852e-55	1.1546e-51	471.082	456.25	1621.16	1675.33
chr2:79532355-79545552	1178.82	1.72095	0.111712	15.4053	1.50746e-53	2.25321e-50	532.178	563.811	1841.72	1777.59
chr25:9567324-9579548	852.019	2.11493	0.138827	15.2343	2.09222e-52	3.01556e-49	355.321	287.225	1369.21	1396.32
chr7:21997384-22001208	625.631	2.52532	0.16793	15.0379	4.14294e-51	5.7654e-48	213.836	159.569	1099.56	1029.56
chr6:37139869-37146549	1356.26	1.59635	0.109189	14.62	2.09259e-48	2.81502e-45	655.977	691.467	1929.46	2148.13
chr2:120693616-120700532	1207.16	1.70561	0.117012	14.5764	3.96847e-48	5.1663e-45	514.492	614.637	1882.77	1816.73
chr17:61361168-61371749	702.04	2.09154	0.144042	14.5204	9.00159e-48	1.13524e-44	265.285	268.313	1112.44	1162.12
chr23:7163525-7173310	1108.7	1.6892	0.118342	14.2738	3.18579e-46	3.89602e-43	483.944	562.629	1704.07	1684.17
chrX:119430467-119436893	1411.72	1.45107	0.101728	14.2642	3.65936e-46	4.34355e-43	742.798	768.297	2111.38	2024.41
chr23:25677549-25683611	652.073	2.28637	0.160769	14.2214	6.74772e-46	7.78051e-43	228.306	216.305	987.67	1176.01
chr10:21001973-21014275	2051.86	1.33905	0.0956807	13.995	1.67336e-44	1.87588e-41	1080.43	1239.91	3066.04	2821.04
chr1:79585644-79597594	1856.99	1.41212	0.102209	13.816	2.0415e-43	2.22673e-40	1096.51	936.14	2831.8	2563.49
chr23:7251827-7256765	826.988	1.91359	0.140814	13.5894	4.62608e-42	4.91302e-39	376.222	320.321	1228.35	1383.06
chr28:26441293-26459928	3067.66	1.04827	0.0773461	13.553	7.60873e-42	7.87347e-39	1940.6	2055.49	4286.34	3988.21
chr19:42485460-42493493	1067.8	1.60845	0.118722	13.548	8.14402e-42	8.21671e-39	496.806	555.538	1653.36	1565.49
chr4:102701119-102710315	1153.84	1.48959	0.111614	13.3458	1.25253e-40	1.23288e-37	628.645	585.087	1678.31	1723.3
chr10:79952022-79969995	1864.73	1.18358	0.0910324	13.0017	1.19629e-38	1.14949e-35	1139.92	1140.62	2499.36	2679.01
chr7:22008426-22020819	1047.17	1.52145	0.122046	12.4662	1.14104e-35	1.07091e-32	522.531	557.901	1646.92	1461.34
chr5:56993095-57004707	2075.23	1.06588	0.0855982	12.4522	1.36126e-35	1.24856e-32	1379.48	1306.1	2777.87	2837.45
chr25:35623821-35633389	1183.07	1.3299	0.108103	12.3021	8.82415e-35	7.91369e-32	676.879	670.191	1678.31	1706.89
chr6:37146724-37153977	586.824	1.97793	0.161618	12.2383	1.94029e-34	1.70227e-31	217.051	256.493	890.271	983.482
chr7:22039060-22044448	864.704	1.5678	0.130904	11.9767	4.70947e-33	4.04383e-30	424.456	446.794	1363.58	1223.99
chr4:47350316-47363681	1995.33	1.01882	0.0856357	11.8971	1.22529e-32	1.03019e-29	1316.78	1320.29	2700.6	2643.66
chr11:101320406-101327408	935.444	1.55802	0.131591	11.8399	2.42806e-32	1.99978e-29	485.552	463.342	1507.67	1285.22
chr19:53840763-53846612	738.245	1.75756	0.148565	11.8303	2.72327e-32	2.19806e-29	345.674	328.595	1242.84	1035.88
chr27:14258149-14267237	1707.37	1.20874	0.102201	11.8272	2.82493e-32	2.2354e-29	1020.95	1040.16	2556.51	2211.89
chr10:103095660-103101505	3180.03	0.859756	0.0729149	11.7912	4.3317e-32	3.36181e-29	2328.08	2193.78	4131.79	4066.49
chr1:56423177-56428056	1002.28	1.44914	0.12372	11.713	1.09289e-31	8.32186e-29	504.845	567.357	1537.45	1399.47
chr23:25841330-25843730	318.291	2.57107	0.219595	11.7082	1.1566e-31	8.64384e-29	96.4673	87.4676	560.243	528.984
chr3:15967440-15970417	667.281	1.66625	0.143437	11.6166	3.39377e-31	2.49022e-28	321.558	317.957	1039.19	990.425
chr23:28056701-28063324	1067.56	1.39772	0.12231	11.4277	3.04179e-30	2.1921e-27	620.606	556.72	1452.93	1639.98
chr14:30889467-30900954	1974.75	0.98199	0.0862261	11.3885	4.76911e-30	3.37661e-27	1310.35	1343.93	2590.32	2654.39
chr10:103101951-103114253	3638.87	0.893432	0.0787831	11.3404	8.27654e-30	5.7589e-27	2355.41	2731.59	4778.97	4689.53
chr2:120742642-120749947	683.252	1.64342	0.14593	11.2616	2.02956e-29	1.38825e-26	302.264	358.144	1042.41	1030.19
chr4:94652198-94671491	2922.12	0.881094	0.0784969	11.2246	3.08845e-29	2.07735e-26	1958.29	2151.23	3713.22	3865.75
chr10:103115173-103120623	2548.7	0.892646	0.079983	11.1604	6.3674e-29	4.21261e-26	1832.88	1738.71	3230.25	3392.95
chr3:33501981-33510127	811.12	1.487	0.13558	10.9677	5.46519e-28	3.55739e-25	464.651	391.24	1172.81	1215.78
chr23:28567439-28569895	698.412	1.72699	0.158022	10.9288	8.39586e-28	5.29424e-25	363.36	287.225	1158.32	984.744
chr26:9413257-9421337	1171.92	1.28505	0.117578	10.9294	8.34209e-28	5.29424e-25	618.998	741.111	1700.85	1626.72
chr8:107079715-107084223	514.015	1.77683	0.164853	10.7783	4.3605e-27	2.70733e-24	244.384	221.033	818.631	772.014
chr22:48979128-48991107	2545.56	0.869951	0.0812574	10.7061	9.52872e-27	5.82652e-24	1810.37	1791.9	3158.61	3421.35
chr4:113890026-113894846	653.208	1.57952	0.147882	10.6809	1.25006e-26	7.52963e-24	315.126	339.232	928.908	1029.56
chr20:4775253-4787133	1965.22	0.932452	0.0878612	10.6128	2.59877e-26	1.54233e-23	1400.38	1304.92	2551.68	2603.89
chr13:40615889-40622307	1050.01	1.24842	0.117684	10.6082	2.72848e-26	1.59585e-23	659.193	587.451	1444.07	1509.31
chr2:44825323-44833808	677.533	1.70812	0.161907	10.55	5.0795e-26	2.92848e-23	373.007	265.949	1018.26	1052.92
chr12:27842562-27848947	844.14	1.46049	0.139575	10.4639	1.26598e-25	7.19594e-23	393.908	502.348	1270.21	1210.1
chr5:99759282-99775342	3980.57	0.787735	0.0755941	10.4206	1.9972e-25	1.11946e-22	2715.55	3118.1	5063.92	5024.72
chr1:111913459-111924214	1855.3	1.01412	0.0973449	10.4178	2.05686e-25	1.12174e-22	1218.7	1237.55	2648.27	2316.67
chr20:62675207-62702607	5007.86	0.726731	0.0697523	10.4187	2.03628e-25	1.12174e-22	3541.96	3996.32	6325.27	6167.91
chr3:48567269-48591358	2887.92	0.795144	0.0763614	10.4129	2.16503e-25	1.16499e-22	2191.41	2035.39	3623.87	3701
chr1:49927694-49937851	1125.44	1.17516	0.113071	10.3931	2.66637e-25	1.41588e-22	651.154	728.109	1569.65	1552.87
chr23:7132433-7139162	614.029	1.53053	0.147514	10.3755	3.20549e-25	1.68005e-22	313.519	317.957	896.711	927.932
chr3:23705916-23718072	2092.12	-0.87162	0.0842835	-10.3415	4.57162e-25	2.36534e-22	2614.26	2795.42	1477.88	1480.9
chr23:25706148-25711997	509.049	1.74201	0.170408	10.2225	1.57178e-24	8.02941e-22	260.462	210.395	759.87	805.47
chr16:70920798-70939981	3617.46	0.758268	0.0744399	10.1863	2.28257e-24	1.15147e-21	2541.91	2829.7	4473.09	4625.14
chr6:68928641-68937796	887.147	1.24695	0.122474	10.1814	2.4011e-24	1.19631e-21	520.923	530.716	1242.03	1254.92
chr2:120712829-120718490	532.024	1.59568	0.158067	10.095	5.81482e-24	2.86181e-21	266.893	262.403	792.067	806.733
chr13:81598098-81613067	1378.44	1.00885	0.100005	10.088	6.24261e-24	3.03534e-21	924.478	906.59	1822.4	1860.28
chr5:94979766-94981179	308.813	2.13479	0.212751	10.0342	1.07806e-23	5.17946e-21	115.761	113.471	502.287	503.735
chr3:54163571-54165912	213.119	2.79815	0.280347	9.98105	1.84509e-23	8.76026e-21	41.8025	63.8277	371.885	374.96
chr20:40320998-40334676	1629.87	1.06593	0.107108	9.95197	2.47235e-23	1.16019e-20	1165.65	946.778	2207.16	2199.89
chr25:9602118-9611039	551.216	1.77621	0.178551	9.94793	2.57471e-23	1.19434e-20	295.833	205.667	884.636	818.726
chr19:10790304-10809061	6884.8	0.664897	0.067336	9.87432	5.37974e-23	2.46716e-20	5030.77	5613.29	8769.09	8126.03
chr14:73923702-73938757	2360.55	0.808858	0.0824608	9.809	1.02989e-22	4.67003e-20	1763.74	1670.16	2922.76	3085.53
chr23:25732973-25738449	396.075	1.80809	0.184825	9.78273	1.33558e-22	5.9889e-20	178.464	173.753	602.1	629.984
chr6:37155321-37177544	2131.72	0.812037	0.0831439	9.76665	1.56538e-22	6.94221e-20	1575.63	1520.05	2708.65	2722.57
chr23:27873434-27880715	982.784	1.31056	0.134289	9.75921	1.68463e-22	7.38987e-20	562.726	567.357	1250.08	1550.97
chr1:52649987-52652023	347.102	1.88248	0.197424	9.53519	1.49604e-21	6.49203e-19	151.132	145.385	543.339	548.553
chr10:67523350-67534257	2367.18	0.845924	0.0897449	9.42587	4.26562e-21	1.83136e-18	1741.23	1646.52	2847.1	3233.87
chr1:66982450-66989329	577.719	1.52175	0.161582	9.4178	4.60631e-21	1.95681e-18	336.028	263.585	845.194	866.07
chr13:44592481-44608078	5116.45	0.615463	0.0661909	9.29829	1.4272e-20	5.99972e-18	3871.55	4205.54	6341.37	6047.34
chr3:30645258-30654008	1354.26	0.935395	0.101784	9.19	3.92854e-20	1.63447e-17	958.242	903.044	1804.69	1751.08
chr12:31439225-31441852	338.791	1.95106	0.212345	9.18819	3.99502e-20	1.64517e-17	162.387	118.199	521.605	552.972
chr5:109962496-109970886	3038.85	0.656569	0.0720101	9.11773	7.67178e-20	3.12737e-17	2385.96	2333.26	3715.63	3720.57
chr3:18727612-18732968	1218.55	0.991394	0.108993	9.09596	9.37577e-20	3.78378e-17	779.777	849.854	1573.67	1670.91
chr26:10676590-10682867	721.917	1.26271	0.139691	9.03928	1.5771e-19	6.30171e-17	397.124	450.34	1056.09	984.113
chr8:39258825-39264473	415.61	1.60161	0.1781	8.99279	2.4104e-19	9.5369e-17	202.581	209.213	614.979	635.665
chr3:21396254-21398884	769.434	1.20041	0.134558	8.92111	4.6163e-19	1.79135e-16	464.651	468.07	1129.34	1015.68
chr5:57006927-57012172	580.3	1.48703	0.16667	8.92199	4.57981e-19	1.79135e-16	352.106	261.221	873.367	834.508
chr4:113901655-113910525	598.943	1.37049	0.154122	8.89226	5.98797e-19	2.29587e-16	366.576	303.773	866.928	858.495
chr5:45091735-45126757	5163.87	0.557892	0.0627446	8.89148	6.03023e-19	2.29587e-16	4090.21	4263.45	6008.93	6292.89
chr25:9582254-9584611	264.21	2.05375	0.231301	8.87911	6.73988e-19	2.54207e-16	106.114	99.2876	449.965	401.473
chr18:11861852-11868459	368.862	1.76633	0.199387	8.85879	8.08898e-19	3.02266e-16	186.503	150.113	602.905	535.928
chr10:103120966-103133042	4594.67	0.587941	0.0663771	8.85759	8.17607e-19	3.02717e-16	3627.17	3712.65	5714.32	5324.56
chr5:74509885-74514933	693.068	1.23693	0.140771	8.78684	1.53826e-18	5.64361e-16	421.24	405.424	924.884	1020.73
chr10:20742756-20745564	504.019	1.41462	0.16103	8.78483	1.56602e-18	5.69369e-16	266.893	282.497	726.867	739.821
chr18:11852507-11857657	295.76	1.91002	0.217722	8.77275	1.74358e-18	6.28263e-16	127.015	121.745	497.457	436.822
chr25:9502155-9503918	180.393	2.58185	0.294872	8.75583	2.02601e-18	7.23571e-16	57.8804	46.0978	331.638	285.955
chr9:12950876-12960583	964.697	1.02893	0.118065	8.71497	2.90835e-18	1.02958e-15	614.175	653.643	1312.06	1278.9
chr18:39761449-39763865	335.013	1.86698	0.215134	8.6782	4.02066e-18	1.41097e-15	167.21	122.927	559.438	490.478
chr23:28593758-28597753	679.345	1.20919	0.139425	8.67275	4.21825e-18	1.46755e-15	393.908	425.518	940.983	956.969
chr23:28551923-28553868	401.275	1.56985	0.181429	8.65268	5.0305e-18	1.73518e-15	194.542	209.213	611.759	589.584
chr1:52773753-52779161	687.732	1.19028	0.137586	8.65116	5.09791e-18	1.74353e-15	426.064	412.516	966.741	945.607
chr2:118231625-118235960	409.7	1.55863	0.181887	8.56921	1.04196e-17	3.53366e-15	205.797	209.213	645.567	578.222
chr2:127674563-127678315	1080.51	0.970101	0.113932	8.51471	1.67009e-17	5.61667e-15	691.349	767.115	1443.27	1420.3
chr23:25671555-25673666	248.515	2.01599	0.236951	8.50808	1.76841e-17	5.89815e-15	96.4673	100.47	376.715	420.41
chr19:53821983-53826079	545.568	1.48192	0.174311	8.50161	1.8698e-17	6.18521e-15	252.423	320.321	879.807	729.721
chr7:17756077-17761497	881.879	1.04191	0.122823	8.48299	2.19482e-17	7.20134e-15	561.118	590.997	1208.22	1167.17
chr10:35212765-35216931	850.137	1.10941	0.132731	8.35837	6.3589e-17	2.06956e-14	527.354	548.446	1248.47	1076.27
chr23:28666911-28669147	934.519	1.1136	0.133284	8.3551	6.53781e-17	2.11077e-14	622.214	560.265	1390.95	1164.65
chr7:17771897-17773821	348.011	1.81275	0.217581	8.33135	7.99284e-17	2.56006e-14	188.111	122.927	551.388	529.616
chr3:54185176-54188756	399.741	1.5154	0.181985	8.32703	8.2899e-17	2.6343e-14	207.405	206.849	616.589	568.122
chr19:53827191-53828473	167.057	2.46429	0.296751	8.30424	1.00457e-16	3.16729e-14	53.057	49.6438	292.196	273.33
chr23:25574149-25576489	191.125	2.23556	0.27131	8.23987	1.72403e-16	5.39353e-14	69.1349	65.0097	314.734	315.623
chr19:61829476-61832564	322.056	1.67836	0.203713	8.23884	1.7389e-16	5.39822e-14	147.916	158.387	472.504	509.416
chr27:14297127-14306866	2231.46	0.737806	0.0898264	8.21369	2.14489e-16	6.60773e-14	1606.18	1736.35	2939.67	2643.66
chrX:90862865-90873197	766.24	1.13173	0.1382	8.18908	2.63227e-16	8.04777e-14	482.336	478.708	973.985	1129.93
chr25:2310143-2316187	743.71	1.21301	0.148656	8.15982	3.35519e-16	1.01809e-13	509.669	390.058	1065.75	1009.36
chr20:6837006-6839033	223.543	2.11292	0.259345	8.14715	3.72616e-16	1.12221e-13	99.6828	69.7377	371.885	352.867
chr11:38003519-38015586	1368.3	0.82794	0.101899	8.12513	4.46878e-16	1.3359e-13	1020.95	952.688	1786.98	1712.57
chr18:55305946-55309651	830.573	1.02499	0.126187	8.12285	4.55365e-16	1.35126e-13	527.354	566.175	1110.83	1117.94
chr18:55471401-55479583	3119.05	0.579149	0.0714588	8.10466	5.28939e-16	1.55813e-13	2514.58	2488.1	3783.25	3690.27
chr9:70974828-70988639	4144.05	0.516242	0.0641647	8.04557	8.58468e-16	2.51052e-13	3422.98	3398.23	4886.83	4868.17
chr4:103514390-103519713	769.703	1.04	0.129566	8.02685	1.00006e-15	2.90355e-13	506.453	501.166	1027.11	1044.08
chr23:25750225-25751941	174.287	2.28013	0.286267	7.96505	1.65154e-15	4.76081e-13	54.6648	63.8277	285.756	292.898
chr19:7718502-7721545	260.024	1.91745	0.240873	7.96045	1.71416e-15	4.90626e-13	127.015	92.1956	437.086	383.798
chr11:19589198-19597648	830.16	1.06241	0.133788	7.94102	2.0053e-15	5.69913e-13	557.902	518.896	1043.21	1200.63
chr19:14799149-14805181	1249.95	0.837147	0.105651	7.92373	2.30493e-15	6.5049e-13	884.283	908.954	1654.97	1551.6
chr15:32325385-32328600	603.372	1.18571	0.150114	7.8987	2.81825e-15	7.89834e-13	369.791	367.6	790.458	885.639
chr1:67018111-67025291	483.12	1.33056	0.169231	7.86239	3.7686e-15	1.04889e-12	302.264	249.401	685.815	695.002
chr5:104027974-104031278	893.224	0.966428	0.123314	7.83711	4.61048e-15	1.27442e-12	585.235	622.911	1220.3	1144.45
chr23:25843914-25848126	325.368	1.58652	0.202778	7.82395	5.1193e-15	1.40544e-12	154.348	170.207	466.869	510.047
chr5:82609915-82613567	839.244	1.02	0.130778	7.79951	6.21498e-15	1.69472e-12	508.061	598.089	1125.32	1125.51
chr1:69126536-69132854	687.186	1.13046	0.145095	7.79117	6.63926e-15	1.79826e-12	461.435	401.878	994.109	891.32
chr18:14707116-14714252	1210.34	0.82431	0.105821	7.78966	6.7189e-15	1.8077e-12	898.753	849.854	1548.72	1544.03
chr23:25767317-25769924	228.304	1.88522	0.242894	7.76151	8.3923e-15	2.23298e-12	102.898	92.1956	355.786	362.335
chr3:54714962-54717668	258.548	1.75151	0.225674	7.76124	8.41025e-15	2.23298e-12	117.369	119.381	392.814	404.629
chr23:25570723-25572668	215.933	1.94678	0.254293	7.65567	1.92304e-14	5.07242e-12	78.7816	98.1056	354.177	332.667
chr3:106118927-106138169	5006.56	-0.462006	0.0604898	-7.63776	2.21039e-14	5.79253e-12	5718.9	5882.79	4194.58	4229.98
chr19:53838070-53840181	630.957	1.08994	0.142779	7.63374	2.28032e-14	5.93721e-12	392.3	413.698	858.073	859.757
chr25:10532847-10548892	1736.61	0.701443	0.0924463	7.58758	3.25943e-14	8.4321e-12	1377.87	1269.46	2174.97	2124.14
chr26:11080958-11088621	716.652	1.07989	0.143475	7.52672	5.20322e-14	1.33749e-11	504.845	418.426	937.763	1005.58
chr12:18725628-18738753	1438.49	0.776619	0.103207	7.52485	5.27794e-14	1.34811e-11	1049.89	1069.71	1917.38	1716.99
chr14:73941320-73944032	340.269	1.53109	0.203854	7.51073	5.87976e-14	1.49239e-11	155.955	192.665	476.528	535.928
chr2:45697117-45707980	1582.47	0.757888	0.100977	7.50555	6.11694e-14	1.54288e-11	1159.22	1191.45	2111.38	1867.86
chr5:106827977-106835962	2361.96	0.601638	0.0804917	7.47453	7.74793e-14	1.94213e-11	1821.62	1929.02	2864.81	2832.4
chr8:112953991-112957970	309.923	1.50796	0.203787	7.39969	1.36499e-13	3.40042e-11	159.171	163.115	466.064	451.341
chr26:32908525-32912339	348.869	1.46795	0.198874	7.38134	1.56705e-13	3.87984e-11	204.189	167.843	489.408	534.034
chr11:103610860-103613645	459.751	1.31831	0.179247	7.35473	1.91312e-13	4.70779e-11	300.656	228.125	651.202	659.021
chr18:19972997-19976508	632.668	1.06451	0.145463	7.31803	2.51629e-13	6.15454e-11	409.986	408.97	812.191	899.526
chr13:37853800-37863366	3584.2	0.503063	0.0688452	7.30716	2.72843e-13	6.6332e-11	2890.8	3037.73	4209.87	4198.42
chr25:7682164-7692910	965.012	0.883144	0.121443	7.27206	3.5405e-13	8.505e-11	670.448	686.739	1181.66	1321.2
chr3:101259162-101268218	941.373	0.8673	0.119254	7.27274	3.52276e-13	8.505e-11	641.507	690.285	1235.59	1198.11
chr19:7712934-7716206	249.562	1.69584	0.234236	7.23988	4.49072e-13	1.07238e-10	115.761	119.381	412.133	350.973
chr3:48629684-48632874	499.144	1.19856	0.165674	7.23444	4.67451e-13	1.1097e-10	331.204	276.587	681.79	706.996
chr2:79558313-79561203	373.284	1.62439	0.225561	7.20154	5.95357e-13	1.40429e-10	133.446	229.307	534.485	595.896
chr3:54094268-54096218	146.633	2.33332	0.324035	7.20082	5.98504e-13	1.40429e-10	57.8804	40.1878	265.632	222.83
chr18:11675151-11685224	1076.31	0.850309	0.118154	7.19664	6.17136e-13	1.43964e-10	746.014	789.572	1297.57	1472.07
chr3:33486687-33492542	326.634	1.5308	0.213665	7.16445	7.80995e-13	1.81142e-10	184.896	152.477	433.866	535.297
chr12:75884793-75887044	190.116	2.07648	0.290269	7.15364	8.45052e-13	1.94879e-10	93.2517	54.3718	306.685	306.154
chr5:112703855-112708545	1580.38	0.713696	0.0997836	7.15244	8.52484e-13	1.95476e-10	1279.8	1118.17	1961.65	1961.91
chr11:105271734-105275952	447.673	-1.163	0.16378	-7.10096	1.23896e-12	2.82489e-10	602.92	634.731	275.292	277.748
chr10:47016139-47021871	1398.33	-0.754643	0.10631	-7.09852	1.261e-12	2.85899e-10	1633.51	1877.01	1007.79	1075.01
chr5:109971482-109979652	1427.11	0.696512	0.0982978	7.08573	1.38315e-12	3.11843e-10	1090.08	1088.62	1725	1804.73
chr18:35414392-35421110	752.946	1.02763	0.145245	7.07512	1.49316e-12	3.34775e-10	533.786	459.796	924.884	1093.32
chr5:103928712-103930725	509.807	1.28672	0.182787	7.03947	1.92966e-12	4.30251e-10	353.713	242.309	720.427	722.777
chr13:61179265-61187946	1759.05	0.662608	0.0943524	7.02269	2.17636e-12	4.82589e-10	1443.79	1283.65	2152.43	2156.34
chr22:32447188-32459636	1418.28	0.747012	0.106614	7.00667	2.44052e-12	5.38207e-10	1064.36	1053.16	1900.48	1655.13
chr7:43626301-43627956	307.244	1.43611	0.205197	6.99866	2.5843e-12	5.66818e-10	155.955	174.935	446.745	451.341
chr18:14905504-14919957	2116.88	0.639696	0.0914817	6.99262	2.69806e-12	5.88572e-10	1533.83	1771.81	2616.08	2545.82
chr8:49318449-49327607	1311.65	0.718831	0.102943	6.98284	2.89281e-12	6.27661e-10	974.319	1008.24	1584.94	1679.12
chr12:75887545-75890124	137.598	2.31116	0.33136	6.97475	3.06408e-12	6.61269e-10	36.9791	54.3718	214.116	244.924
chr27:29221737-29270719	9891.4	0.398679	0.0573318	6.95389	3.55346e-12	7.62804e-10	8148.27	8911.06	11407.7	11098.6
chr23:7143751-7147120	244.974	1.77976	0.25638	6.94189	3.86876e-12	8.26092e-10	136.662	86.2856	404.083	352.867
chr5:78279411-78285962	2471.56	0.537604	0.0776251	6.92565	4.33975e-12	9.21786e-10	2009.73	2022.39	2954.15	2899.95
chr23:25702513-25704078	185.861	1.88768	0.273708	6.89667	5.32348e-12	1.12482e-09	80.3894	78.0117	265.632	319.411
chr23:28732880-28736268	553.199	1.05959	0.153788	6.88991	5.58273e-12	1.17345e-09	363.36	354.598	713.988	780.852
chr15:77481206-77514396	4780.51	0.478537	0.0695523	6.88024	5.97522e-12	1.243e-09	3804.03	4181.9	5395.56	5740.55
chr5:71099174-71103691	1095.37	0.800434	0.116332	6.88058	5.96078e-12	1.243e-09	818.364	781.298	1307.23	1474.59
chr11:44676699-44709878	4293.39	0.474496	0.0690718	6.8696	6.43843e-12	1.33249e-09	3480.86	3704.37	4827.27	5161.07
chr10:80617414-80624079	1389.74	0.706083	0.102832	6.86637	6.5855e-12	1.35598e-09	1114.2	1001.15	1694.41	1749.18
chr5:97746844-97751242	657.362	1.011	0.148079	6.82741	8.64622e-12	1.77125e-09	434.103	437.338	950.642	807.364
chr18:25034597-25039685	883.789	0.864334	0.126814	6.81577	9.37614e-12	1.91107e-09	646.331	607.545	1205.01	1076.27
chr8:107057493-107060027	418.366	1.18123	0.173382	6.81288	9.56614e-12	1.94e-09	255.638	256.493	575.537	585.797
chr25:9596182-9598542	168.168	1.91455	0.282325	6.78136	1.19049e-11	2.40222e-09	73.9582	67.3737	271.267	260.073
chr2:120681206-120686191	425.957	1.1617	0.172021	6.75327	1.44549e-11	2.90227e-09	258.854	267.131	596.465	581.378
chr12:18865770-18869518	901.765	0.893986	0.132558	6.74412	1.53956e-11	3.07585e-09	702.603	562.629	1178.44	1163.39
chr23:7244048-7247927	383.179	1.29843	0.19293	6.73007	1.69584e-11	3.35486e-09	252.423	192.665	535.29	552.341
chr3:92919715-92922609	684.199	0.920656	0.136789	6.73046	1.69131e-11	3.35486e-09	475.905	470.434	875.782	914.676
chr23:25637401-25638104	69.1189	3.76948	0.562012	6.70712	1.98503e-11	3.90779e-09	8.03894	10.638	100.618	157.18
chr12:15469534-15478579	4187.33	0.447725	0.0668705	6.6954	2.15075e-11	4.21349e-09	3419.76	3661.82	4862.68	4805.05
chr21:34628318-34631353	407.922	1.17425	0.175482	6.69157	2.20794e-11	4.30463e-09	249.207	251.765	559.438	571.278
chr2:118463541-118465468	248.329	1.58469	0.237569	6.67043	2.55054e-11	4.94866e-09	107.722	139.475	350.957	395.16
chr6:101743014-101749990	1285.81	0.689703	0.103585	6.65834	2.76945e-11	5.34769e-09	959.849	1007.06	1625.99	1550.34
chr25:13545023-13550147	748.125	0.949325	0.142677	6.65365	2.85917e-11	5.49464e-09	456.612	561.447	1026.31	948.132
chr5:27045821-27050069	392.531	1.23716	0.186058	6.64932	2.94456e-11	5.63192e-09	258.854	210.395	558.633	542.241
chr14:14850254-14855089	1075.96	0.751958	0.113841	6.60533	3.96634e-11	7.55046e-09	782.993	819.122	1407.05	1294.69
chr1:143510921-143524652	2441.21	-0.507689	0.077045	-6.58951	4.41279e-11	8.36089e-09	2850.61	2881.7	2022.03	2010.52
chr19:52239283-52242712	372.274	1.23033	0.186744	6.58834	4.44774e-11	8.38773e-09	231.521	213.941	544.949	498.685
chr23:7280459-7298870	4997.03	0.411372	0.0626676	6.56436	5.2258e-11	9.80918e-09	4283.15	4296.55	5551.72	5856.7
chr6:36341119-36346130	266.416	1.57436	0.240365	6.54988	5.75837e-11	1.07588e-08	130.231	137.111	461.234	337.086
chr7:21920881-21922434	106.839	2.42665	0.371628	6.52978	6.58653e-11	1.22494e-08	35.3713	31.9139	165.014	195.055
chr26:9405872-9412451	612.955	0.962055	0.1474	6.52684	6.71724e-11	1.24352e-08	434.103	398.332	843.584	775.802
chr10:46991185-47007403	1725.07	-0.731218	0.112314	-6.51047	7.49145e-11	1.38051e-08	1885.94	2417.18	1291.13	1306.05
chr13:79520654-79522747	149.966	1.99176	0.307912	6.46861	9.89067e-11	1.81435e-08	70.7427	50.8258	230.215	248.08
chr29:25752161-25754601	343.444	1.25065	0.193469	6.46438	1.01716e-10	1.85744e-08	192.935	212.759	499.067	469.016
chr18:11858119-11861510	203.674	1.8145	0.281439	6.44723	1.13912e-10	2.07078e-08	110.937	70.9197	352.567	280.273
chr1:81632648-81637939	590.406	0.971969	0.151428	6.41868	1.37461e-10	2.48767e-08	398.731	398.332	832.315	732.246
chr13:17517970-17521344	272.135	1.39006	0.21763	6.38726	1.68881e-10	3.04265e-08	160.779	140.657	388.789	398.316
chr25:24932080-24933760	117.976	2.20785	0.34615	6.37829	1.79071e-10	3.21189e-08	46.6258	37.8238	201.237	186.218
chr19:7721864-7725979	244.609	1.47597	0.23152	6.37513	1.82807e-10	3.26439e-08	141.485	118.199	355.786	362.967
chr2:120688725-120692879	556.618	0.992781	0.155842	6.37042	1.88507e-10	3.35135e-08	397.124	348.688	771.139	709.521
chr16:79699749-79701315	279.448	1.46065	0.229648	6.36039	2.01248e-10	3.56218e-08	122.192	173.753	429.842	392.004
chr18:62109619-62118599	1847.61	-0.673544	0.105954	-6.35694	2.05806e-10	3.62312e-08	2165.69	2373.45	1564.82	1286.48
chr23:27945403-27948069	343.985	1.21412	0.191007	6.35644	2.06486e-10	3.62312e-08	202.581	211.577	475.723	486.06
chr5:74496440-74503113	638.961	0.911691	0.143452	6.35539	2.07892e-10	3.63199e-08	426.064	459.796	864.513	805.47
chr5:65701928-65706638	421.73	1.15723	0.182752	6.33222	2.41661e-10	4.20375e-08	291.01	232.853	606.93	556.128
chr1:141620551-141623046	217.451	1.70036	0.268777	6.32626	2.51168e-10	4.35038e-08	128.623	78.0117	338.078	325.092
chr16:71113851-71116104	361.639	1.33548	0.211144	6.32497	2.53289e-10	4.36837e-08	242.776	170.207	474.919	558.653
chr13:79526009-79529853	204.475	1.60415	0.253967	6.31637	2.67776e-10	4.59856e-08	104.506	98.1056	326.808	288.48
chr19:10710997-10717764	1502.04	0.643252	0.103478	6.2163	5.09018e-10	8.70442e-08	1080.43	1261.19	1835.28	1831.25
chr23:7258570-7264118	353.393	1.18385	0.190841	6.20334	5.52764e-10	9.41261e-08	223.483	209.213	467.674	513.203
chr23:7156710-7160547	169.151	1.85663	0.299835	6.19218	5.9339e-10	1.00619e-07	77.1738	69.7377	219.75	309.942
chr13:78003093-78007413	661.592	0.894615	0.144915	6.17336	6.68546e-10	1.12889e-07	438.926	485.8	811.386	910.257
chr8:1572301-1573663	202.531	1.66794	0.271346	6.1469	7.90099e-10	1.32858e-07	112.545	82.7396	272.072	342.767
chr22:59786409-59788502	445.971	1.05632	0.172442	6.12567	9.03015e-10	1.51216e-07	266.893	310.865	622.224	583.903
chr15:40284646-40286789	464.27	1.03877	0.169674	6.12213	9.23321e-10	1.53977e-07	292.617	314.411	664.886	585.165
chr23:25526062-25526528	84.7937	2.58505	0.423481	6.10427	1.03271e-09	1.7151e-07	28.9402	20.0939	148.11	142.03
chr2:118360756-118364585	510.353	1.22273	0.200442	6.10016	1.05962e-09	1.75258e-07	384.261	231.671	693.864	731.614
chr22:10638940-10641988	231.134	1.48113	0.24287	6.09843	1.07113e-09	1.76439e-07	133.446	111.108	366.251	313.729
chr23:7490653-7492863	486.44	1.00547	0.165178	6.08719	1.14908e-09	1.88509e-07	300.656	345.142	627.053	672.909
chr5:27021432-27024451	513.522	0.957958	0.15741	6.08575	1.1595e-09	1.89449e-07	334.42	362.872	668.106	688.69
chr10:47007787-47015880	1105.04	-0.667327	0.10976	-6.07985	1.20296e-09	1.95757e-07	1305.52	1405.39	870.952	838.295
chr1:67041660-67049626	429.134	1.1933	0.196339	6.07777	1.21865e-09	1.97514e-07	300.656	223.397	658.446	534.034
chr26:11067770-11068639	76.6446	2.70726	0.445761	6.07336	1.25263e-09	2.02209e-07	19.2935	21.2759	132.816	133.193
chr18:49213986-49215403	159.009	1.91178	0.315466	6.06018	1.35968e-09	2.18616e-07	86.8205	48.4618	240.679	260.073
chr3:20141851-20145288	1313.45	0.646899	0.107051	6.04293	1.51343e-09	2.42371e-07	988.79	1056.7	1686.36	1521.93
chr20:2680052-2684661	541.809	0.956767	0.158645	6.03087	1.63074e-09	2.60126e-07	340.851	394.786	684.205	747.396
chr10:21945625-21951460	516.94	0.940509	0.15597	6.03008	1.6388e-09	2.60381e-07	364.968	343.96	683.4	675.434
chr13:44579599-44582877	761.956	0.882877	0.146473	6.02757	1.66442e-09	2.63416e-07	467.866	600.453	1035.16	944.344
chr13:81563129-81567818	845.344	0.81744	0.136663	5.98141	2.21216e-09	3.48735e-07	540.217	680.829	1065.75	1094.58
chr26:11026368-11029196	265.775	1.34479	0.225219	5.97102	2.3577e-09	3.70232e-07	165.602	135.929	358.201	403.366
chr23:40993104-41014033	3142.96	0.440226	0.0738032	5.96486	2.44846e-09	3.82994e-07	2566.03	2764.69	3651.24	3589.9
chrX:119456066-119457694	217.307	1.60993	0.269957	5.96366	2.46654e-09	3.84332e-07	96.4673	117.017	385.569	270.173
chr23:27785143-27787631	205.772	1.50666	0.252851	5.95871	2.54243e-09	3.94634e-07	96.4673	117.017	294.61	314.992
chr4:113898671-113901395	202.089	1.5641	0.262698	5.95397	2.61709e-09	4.04666e-07	96.4673	107.562	267.242	337.086
chr28:26479993-26481893	245.969	1.38051	0.232121	5.9474	2.72434e-09	4.19641e-07	139.878	133.565	326.003	384.429
chr22:51395395-51397454	425.038	1.02011	0.172368	5.91821	3.25454e-09	4.99405e-07	292.617	269.495	578.757	559.284
chr5:47644228-47648355	1065.49	0.749659	0.126785	5.91282	3.36302e-09	5.14096e-07	717.073	868.766	1419.93	1256.18
chr7:5725127-5727271	376.801	1.07139	0.181367	5.9073	3.47758e-09	5.29603e-07	241.168	244.673	511.946	509.416
chr18:25068732-25073010	308.409	1.23745	0.210581	5.87636	4.19398e-09	6.36302e-07	168.818	197.393	468.479	398.948
chr22:10626146-10628150	116.424	2.16847	0.369171	5.87389	4.25675e-09	6.43407e-07	51.4492	34.2778	157.77	222.199
chr27:37185917-37188663	234.387	1.38859	0.237003	5.85895	4.65816e-09	7.01452e-07	123.8	134.747	364.641	314.361
chr21:66850143-66857131	1194.87	0.617296	0.1055	5.85115	4.882e-09	7.32427e-07	935.733	950.324	1420.73	1472.7
chr3:20128211-20138509	3824.3	0.512015	0.0875346	5.84929	4.9369e-09	7.3792e-07	2815.24	3483.34	4479.53	4519.09
chr6:36301711-36303468	204.489	1.46323	0.250275	5.8465	5.02013e-09	7.47592e-07	101.291	115.835	297.83	302.998
chr13:81628495-81630748	690.277	0.846129	0.145791	5.80372	6.48601e-09	9.62338e-07	440.534	543.718	906.37	870.489
chr29:41862387-41864228	87.6475	2.37095	0.408772	5.80018	6.62419e-09	9.7924e-07	33.7635	23.6399	150.525	142.662
chr18:25064729-25068444	162.599	1.65205	0.285252	5.79155	6.9741e-09	1.0272e-06	86.8205	70.9197	238.264	254.392
chr14:64218297-64222950	1142.04	0.633605	0.110313	5.74369	9.26377e-09	1.35948e-06	871.421	918.41	1337.82	1440.5
chr21:34623463-34627353	259	1.27768	0.223004	5.72938	1.00798e-08	1.47387e-06	163.994	139.475	358.201	374.329
chr7:49077973-49081061	387.411	1.03233	0.180224	5.72805	1.01592e-08	1.48012e-06	250.815	257.675	539.314	501.841
chr1:67035085-67037358	141.985	1.74282	0.304303	5.72726	1.02064e-08	1.48165e-06	64.3115	66.1917	231.02	206.418
chr1:10230491-10238029	715.037	0.784586	0.137127	5.72158	1.05537e-08	1.52658e-06	557.902	494.074	925.689	882.482
chr11:60297968-60299590	144.496	1.81897	0.318223	5.71602	1.09048e-08	1.57174e-06	67.5271	60.2817	260.803	189.374
chr2:124346595-124349083	545.334	0.946723	0.165721	5.71277	1.11154e-08	1.59638e-06	414.809	332.141	761.48	672.909
chr13:81381750-81384777	555.838	0.906664	0.159541	5.68295	1.32393e-08	1.89468e-06	350.498	420.79	761.48	690.583
chr23:7268253-7270472	376.505	1.15451	0.203636	5.66949	1.43223e-08	2.04242e-06	192.935	271.859	486.993	554.234
chr10:86486339-86495891	2924.99	0.431283	0.0761008	5.66726	1.45097e-08	2.06187e-06	2559.6	2425.45	3263.25	3451.65
chr15:50637060-50638670	313.363	1.12583	0.198678	5.66662	1.45645e-08	2.06238e-06	197.758	196.211	425.817	433.666
chr1:121944425-121949096	721.984	0.752515	0.132898	5.66234	1.49319e-08	2.10193e-06	551.471	524.806	918.444	893.213
chr3:54898165-54900478	204.684	1.41234	0.249435	5.66216	1.4948e-08	2.10193e-06	118.976	105.198	292.196	302.367
chr11:78742524-78745978	625.581	0.891629	0.158038	5.64188	1.68204e-08	2.35701e-06	389.085	484.618	871.757	756.864
chr3:10699996-10702358	182.126	1.49079	0.264974	5.62618	1.84246e-08	2.57288e-06	98.0751	93.3776	256.778	280.273
chr26:25689462-25691829	519.83	0.915647	0.163101	5.61397	1.97735e-08	2.75172e-06	379.438	341.596	727.672	630.615
chr19:23278663-23281831	748.842	0.762414	0.13597	5.60721	2.05613e-08	2.85152e-06	533.786	575.631	996.524	889.426
chr25:35634239-35636440	273.034	1.35005	0.240961	5.60275	2.10972e-08	2.91583e-06	143.093	164.297	325.198	459.547
chr10:42653375-42662710	2114.21	0.465687	0.0831453	5.60088	2.13269e-08	2.93751e-06	1734.8	1815.54	2444.62	2461.86
chr17:12601974-12603180	168.974	1.55305	0.277733	5.59187	2.24635e-08	3.08353e-06	93.2517	79.1936	241.484	261.967
chr10:21014599-21016930	501.211	0.912988	0.163807	5.57356	2.49589e-08	3.41447e-06	371.399	325.049	686.619	621.778
chr2:29922486-29925384	363.129	1.08021	0.193854	5.57226	2.51455e-08	3.42836e-06	257.246	210.395	518.386	466.491
chr18:49991692-49994802	2033.53	0.523805	0.0940379	5.57015	2.54527e-08	3.45857e-06	1694.61	1641.79	2563.76	2233.98
chr7:22004370-22005889	238.518	1.3449	0.241634	5.56586	2.60861e-08	3.53274e-06	157.563	113.471	345.322	337.717
chr4:47332161-47342471	670.973	0.764166	0.137428	5.56049	2.6902e-08	3.63105e-06	487.16	507.076	829.9	859.757
chr3:69053305-69066824	2470.02	0.526761	0.0947964	5.55676	2.74835e-08	3.69717e-06	1881.11	2164.23	2723.94	3110.78
chr1:111930500-111935347	269.909	1.21949	0.219646	5.55207	2.82306e-08	3.78506e-06	157.563	166.661	350.152	405.26
chr5:74450871-74452573	234.945	1.2783	0.230352	5.54933	2.86761e-08	3.83205e-06	133.446	140.657	329.223	336.454
chr7:21993533-21995948	147.061	1.78009	0.320815	5.54865	2.87881e-08	3.83432e-06	49.8414	81.5576	206.871	249.974
chr10:13549870-13555520	882.802	0.66656	0.120252	5.54303	2.9728e-08	3.94649e-06	681.702	683.193	1072.99	1093.32
chr12:75890325-75892060	224.459	1.54112	0.278124	5.54111	3.00553e-08	3.97686e-06	83.605	144.203	293.806	376.223
chr25:9475509-9477352	350.768	1.20273	0.217495	5.5299	3.20417e-08	4.22585e-06	252.423	174.935	437.891	537.822
chr18:25029929-25031999	193.661	1.5125	0.273953	5.52101	3.37053e-08	4.43076e-06	122.192	80.3756	296.22	275.855
chr25:7693227-7699384	1215.23	0.585407	0.106446	5.49959	3.80684e-08	4.98807e-06	1014.51	931.412	1450.51	1464.49
chr5:83546355-83547443	168.484	1.49851	0.273797	5.47307	4.42317e-08	5.77689e-06	90.0361	86.2856	249.533	248.08
chr3:101226958-101236381	2065.1	0.455218	0.083728	5.43687	5.42239e-08	7.05908e-06	1773.39	1711.53	2410.82	2364.65
chr18:55508953-55511423	314.229	1.1644	0.214752	5.42208	5.89086e-08	7.64429e-06	162.387	223.397	456.405	414.729
chr11:46349875-46370698	3777.21	0.373871	0.0689663	5.42107	5.92436e-08	7.66312e-06	3366.71	3217.39	4161.57	4363.17
chr18:52522855-52525341	311.307	1.13444	0.210034	5.4012	6.61955e-08	8.53499e-06	184.896	204.485	385.569	470.278
chrX:99086487-99087647	106.331	1.96992	0.365346	5.39192	6.971e-08	8.95951e-06	40.1947	46.0978	146.5	192.53
chr17:14556808-14558164	240.039	1.22884	0.227951	5.39084	7.01304e-08	8.98493e-06	147.916	139.475	344.517	328.248
chr25:9547368-9548905	138.432	1.64871	0.306438	5.38023	7.43919e-08	9.50074e-06	69.1349	65.0097	198.017	221.567
chr18:63192828-63206513	6181.05	0.345506	0.0644173	5.36356	8.15975e-08	1.03881e-05	5151.35	5731.49	6900.81	6940.55
chr11:90055910-90057051	151.131	1.56466	0.291817	5.36177	8.24117e-08	1.04588e-05	70.7427	81.5576	220.555	231.667
chr5:110333303-110350168	3888.35	0.353347	0.0659213	5.36013	8.31624e-08	1.0521e-05	3373.14	3454.97	4327.39	4397.89
chr10:88778912-88785648	978.196	0.749705	0.140156	5.34909	8.83997e-08	1.11486e-05	615.783	839.216	1256.52	1201.26
chr13:79532869-79535021	335.249	1.02414	0.191572	5.34596	8.99374e-08	1.13072e-05	223.483	218.669	453.185	445.66
chr29:43938791-43940575	339.969	1.02145	0.191185	5.34273	9.15589e-08	1.14753e-05	215.444	232.853	450.77	460.81
chr5:108108935-108112368	602.005	0.853254	0.159836	5.33832	9.38105e-08	1.17211e-05	382.654	472.798	832.315	720.252
chr19:53831703-53834615	394.847	1.09736	0.205608	5.33716	9.44126e-08	1.17586e-05	207.405	293.135	594.051	484.797
chr25:22192988-22194568	102.249	2.00335	0.375396	5.33662	9.46936e-08	1.17586e-05	33.7635	47.2798	144.89	183.061
chr8:499073-500560	150.085	1.5674	0.294115	5.32921	9.86394e-08	1.2211e-05	70.7427	80.3756	212.506	236.717
chrX:87200578-87204453	694.431	0.757881	0.142382	5.32287	1.02143e-07	1.26061e-05	490.375	540.172	929.713	817.464
chr8:502930-504532	165.646	1.6387	0.308117	5.31842	1.04673e-07	1.2879e-05	64.3115	95.7416	210.896	291.636
chr23:25563146-25565877	156.128	1.55127	0.291745	5.31722	1.05364e-07	1.29245e-05	90.0361	69.7377	222.97	241.767
chr3:54901079-54902633	86.0128	2.20183	0.414242	5.31532	1.06469e-07	1.30205e-05	38.5869	23.6399	150.525	131.299
chr10:57995916-57997210	93.5167	2.06495	0.391175	5.27884	1.30004e-07	1.58506e-05	28.9402	42.5518	138.451	164.124
chr25:9593774-9595930	138.451	1.63199	0.309453	5.27377	1.33652e-07	1.62463e-05	69.1349	66.1917	189.967	228.511
chr16:42019975-42022905	595.002	0.770438	0.146259	5.26763	1.38195e-07	1.67482e-05	459.827	420.79	752.625	746.764
chr13:69708064-69709907	225.757	1.30695	0.248352	5.26251	1.421e-07	1.71698e-05	152.74	108.744	313.929	327.617
chr3:109610068-109625781	2735.06	0.412369	0.0783692	5.26188	1.42587e-07	1.71772e-05	2326.47	2367.54	3001.65	3244.61
chr10:13637741-13640392	788.111	0.721886	0.137215	5.26097	1.433e-07	1.72118e-05	537.001	650.097	1013.43	951.919
chr3:18733378-18737579	464.888	0.89368	0.170189	5.25109	1.51203e-07	1.81071e-05	313.519	336.868	560.243	648.921
chr5:34941453-34944039	412.475	0.906021	0.172626	5.24845	1.53386e-07	1.83142e-05	289.402	284.861	535.29	540.347
chr18:36546418-36559295	1322	0.572884	0.109256	5.24348	1.57578e-07	1.87592e-05	988.79	1134.71	1521.35	1643.13
chr23:28491444-28494578	299.059	1.07383	0.205744	5.21926	1.79644e-07	2.13232e-05	180.072	204.485	394.424	417.254
chr3:33496165-33500519	269.739	1.2808	0.245545	5.21618	1.82653e-07	2.16168e-05	186.503	130.019	330.028	432.404
chr24:41089418-41090867	312.952	1.03578	0.198748	5.21153	1.87288e-07	2.21005e-05	212.228	198.575	425.012	415.991
chr24:58743562-58747368	415.022	0.933065	0.179133	5.20879	1.90081e-07	2.23647e-05	311.911	260.039	561.048	527.091
chr23:28524798-28526747	285.566	1.29588	0.248834	5.20779	1.91105e-07	2.24198e-05	118.976	209.213	387.984	426.091
chr3:55013848-55017703	591.501	0.780693	0.150081	5.20181	1.97353e-07	2.30858e-05	411.594	457.432	782.408	714.571
chr13:81624424-81627475	637.666	0.767119	0.147633	5.1961	2.0351e-07	2.37372e-05	427.672	514.168	812.191	796.633
chr11:46961098-46979840	2315.4	-0.418399	0.0806501	-5.18782	2.12766e-07	2.47452e-05	2567.64	2728.04	1997.07	1968.86
chr3:23704248-23705746	322.554	-1.06461	0.20603	-5.16725	2.3756e-07	2.75495e-05	385.869	485.8	225.385	193.161
chr6:68926232-68928168	136.179	1.5768	0.30575	5.15715	2.50741e-07	2.89947e-05	70.7427	66.1917	207.676	200.105
chr5:30854918-30858269	900.865	0.710669	0.137921	5.15274	2.5671e-07	2.96001e-05	760.484	608.727	1188.91	1045.34
chr18:49098038-49101054	1337.84	0.533125	0.103594	5.14628	2.65701e-07	3.05495e-05	1045.06	1139.44	1625.99	1540.87
chr23:20588480-20590450	287.328	1.09249	0.212342	5.14494	2.67606e-07	3.06812e-05	167.21	198.575	407.303	376.223
chr14:21055680-21065015	1798.36	0.453437	0.0882118	5.14032	2.74268e-07	3.13559e-05	1535.44	1501.13	2100.91	2055.97
chr13:40627290-40634148	401.182	0.955547	0.186056	5.1358	2.8094e-07	3.20279e-05	273.324	273.041	475.723	582.64
chr10:19575242-19579595	328.278	0.998149	0.194557	5.13038	2.89164e-07	3.28727e-05	217.051	221.033	421.792	453.235
chr13:54052742-54054566	331.304	0.999409	0.194929	5.12705	2.94318e-07	3.33646e-05	210.62	230.489	458.015	426.091
chr4:103511118-103513541	127.053	1.68355	0.329421	5.11063	3.21084e-07	3.62969e-05	51.4492	68.5557	175.478	212.73
chr23:28669642-28672400	247.225	1.15918	0.227004	5.10644	3.28293e-07	3.70082e-05	162.387	144.203	324.393	357.917
chr11:72665974-72667513	180.751	1.37128	0.269003	5.09765	3.43902e-07	3.86598e-05	99.6828	101.652	284.951	236.717
chr25:9588005-9591730	227.678	1.38975	0.273901	5.0739	3.89734e-07	4.36903e-05	163.994	89.8316	323.589	333.298
chr19:7709437-7712573	349.727	1.05584	0.208448	5.06527	4.07815e-07	4.55906e-05	268.501	187.937	488.603	453.866
chr12:85197720-85201492	478.132	0.836831	0.165277	5.06319	4.12299e-07	4.59645e-05	352.106	334.504	649.592	576.328
chr4:47346158-47349854	279.83	1.09778	0.216967	5.05967	4.19985e-07	4.66923e-05	159.171	196.211	366.251	397.685
chr1:144714526-144719500	466.862	-0.80587	0.159343	-5.05745	4.24889e-07	4.71078e-05	598.097	589.815	343.712	335.823
chr23:17289152-17290870	130.401	-1.59975	0.316436	-5.05552	4.29218e-07	4.74574e-05	220.267	172.571	55.5413	73.2246
chr20:33652582-33668123	2353.43	0.422249	0.0835432	5.05426	4.32072e-07	4.76425e-05	1958.29	2063.76	2592.73	2798.95
chr17:18471410-18484164	1946.57	0.479562	0.0949647	5.04989	4.42055e-07	4.86104e-05	1746.06	1509.41	2321.47	2209.36
chr22:32460990-32464022	510.048	0.824377	0.163301	5.04822	4.45955e-07	4.8906e-05	397.124	340.414	683.4	619.253
chr7:80339346-80341631	343.871	-0.936673	0.185768	-5.04218	4.60266e-07	5.03386e-05	466.258	437.338	241.484	230.405
chr5:56938044-56945810	2091.08	0.442226	0.0877615	5.03896	4.68075e-07	5.10544e-05	1688.18	1854.55	2469.58	2352.02
chr16:70949470-70951843	615.239	0.785204	0.155859	5.03792	4.70614e-07	5.11929e-05	408.378	492.892	833.12	726.564
chr6:36335999-36340973	312.718	1.18753	0.235941	5.03318	4.82403e-07	5.23342e-05	241.168	143.021	438.696	427.985
chr27:14954719-14957582	422.417	0.952155	0.189229	5.03175	4.86016e-07	5.25848e-05	245.992	327.413	594.856	521.409
chr18:62087584-62103659	6703.12	-0.285339	0.0567225	-5.03044	4.89347e-07	5.28037e-05	7358.85	7367.37	6177.16	5909.1
chr15:73779344-73785892	844.451	0.658745	0.131	5.02858	4.94126e-07	5.31772e-05	612.567	695.013	1089.9	980.325
chr1:67026067-67029818	193.204	1.42645	0.284132	5.02038	5.15681e-07	5.53493e-05	133.446	78.0117	272.877	288.48
chr23:28766850-28771565	543.352	0.79852	0.159267	5.01374	5.33833e-07	5.70304e-05	437.318	358.144	684.205	693.74
chr7:43620605-43624003	403.547	0.925548	0.184607	5.01361	5.3417e-07	5.70304e-05	305.48	252.947	495.847	559.915
chr3:54147481-54150052	115.911	1.79171	0.357722	5.00867	5.48065e-07	5.8206e-05	59.4882	44.9158	210.896	148.343
chr9:66617053-66623011	863.746	0.651425	0.130054	5.00888	5.47465e-07	5.8206e-05	688.133	657.189	977.205	1132.46
chr4:113895478-113898503	170.94	1.3788	0.276222	4.99162	5.98747e-07	6.34216e-05	98.0751	92.1956	224.58	268.911
chr21:25990698-25991664	102.419	1.7741	0.355805	4.98616	6.15917e-07	6.50696e-05	46.6258	46.0978	155.355	161.599
chr16:62160859-62162267	243.378	1.21902	0.244579	4.98418	6.2226e-07	6.54891e-05	168.818	125.291	305.075	374.329
chr3:15399021-15400359	194.663	1.33383	0.267627	4.98391	6.23133e-07	6.54891e-05	125.407	96.9236	249.533	306.786
chr15:43373894-43382502	1233.1	0.56641	0.113745	4.97965	6.36999e-07	6.67724e-05	940.556	1044.88	1566.43	1380.54
chr11:38342951-38347404	468.809	0.835569	0.167923	4.9759	6.49442e-07	6.79004e-05	331.204	341.596	643.152	559.284
chr19:14763010-14765008	303.686	1.01065	0.203412	4.96849	6.74767e-07	7.03658e-05	188.111	213.941	413.743	398.948
chr7:12777940-12782217	1231.38	0.519052	0.1047	4.9575	7.1405e-07	7.42704e-05	980.751	1042.52	1435.22	1467.02
chr21:58750645-58751629	91.6606	1.90513	0.384696	4.95228	7.33473e-07	7.60945e-05	36.9791	40.1878	130.401	159.074
chr5:24817279-24818128	95.5492	1.87618	0.379925	4.93829	7.88089e-07	8.1551e-05	41.8025	40.1878	130.401	169.805
chr11:101094420-101096725	311.049	1.03049	0.208724	4.93711	7.9289e-07	8.18381e-05	176.857	230.489	414.548	422.304
chr21:19596889-19610015	2438.34	0.417334	0.0846209	4.93181	8.1472e-07	8.38331e-05	2014.56	2158.32	2914.71	2665.75
chr7:12428871-12438952	2721.15	0.403134	0.0817481	4.93141	8.16375e-07	8.38331e-05	2258.94	2424.27	3238.3	2963.07
chr13:3974633-3982793	1131.87	-0.540563	0.109703	-4.92753	8.32771e-07	8.52998e-05	1339.29	1342.75	966.741	878.695
chr10:26606405-26608849	281.955	1.11498	0.226669	4.91898	8.69943e-07	8.88817e-05	184.896	171.389	439.501	332.036
chr3:19862217-19863237	227.976	1.19886	0.244337	4.90656	9.26873e-07	9.44591e-05	122.192	153.659	291.391	344.66
chr14:64045452-64064346	3795.7	0.323681	0.0660179	4.90293	9.44198e-07	9.59824e-05	3358.67	3384.05	4246.09	4194
chr2:34110533-34112330	134.411	1.53006	0.312212	4.90069	9.54987e-07	9.68352e-05	78.7816	60.2817	197.212	201.368
chr23:7151880-7153676	99.8949	1.77055	0.361374	4.8995	9.60794e-07	9.71799e-05	41.8025	48.4618	152.135	157.18
chr1:145208335-145211108	401.268	-0.895336	0.182845	-4.89668	9.74684e-07	9.83383e-05	572.372	472.798	263.218	296.686
chr4:15828040-15832123	610.323	0.761326	0.155499	4.89601	9.78035e-07	9.84303e-05	471.082	436.156	693.864	840.189
chr16:51464728-51466448	214.182	1.23973	0.254387	4.87339	1.09702e-06	0.00011013	104.506	148.931	294.61	308.679
chr21:34641096-34643969	373.273	0.962761	0.197786	4.8677	1.12903e-06	0.000113063	282.971	224.579	536.094	449.447
chr15:29932198-29935466	641.171	-0.715776	0.147184	-4.86313	1.15542e-06	0.000115419	847.304	747.021	518.386	451.972
chr10:35221975-35227106	796.98	0.720625	0.148263	4.86046	1.17113e-06	0.000116699	570.765	631.185	1114.85	871.12
chr9:12942972-12946982	409.21	0.854666	0.175914	4.85843	1.18321e-06	0.000117613	300.656	282.497	550.584	503.103
chr13:77368666-77381340	3168.25	0.379381	0.0781458	4.85478	1.2052e-06	0.000119505	2900.45	2611.03	3680.22	3481.32
chr14:63416521-63427276	1090.24	-0.529583	0.109098	-4.85421	1.20869e-06	0.000119556	1257.29	1317.92	909.59	876.17
chr13:81365567-81367677	289.184	1.00212	0.206801	4.84583	1.26084e-06	0.00012441	184.896	199.757	395.229	376.854
chr10:80615325-80616758	271.057	1.06473	0.219948	4.84085	1.29287e-06	0.000127259	154.348	195.029	371.885	362.967
chr28:26413954-26417449	192.869	1.24398	0.257175	4.83711	1.31741e-06	0.000129046	102.898	125.291	276.902	266.386
chr4:91958886-91959378	77.4321	2.10531	0.435233	4.8372	1.31681e-06	0.000129046	20.9012	36.6418	136.036	116.149
chr1:22097292-22100720	354.322	0.917453	0.189713	4.83601	1.32472e-06	0.000129448	228.306	261.221	478.943	448.816
chr7:4597533-4606993	2574.9	0.372204	0.0770051	4.83349	1.3416e-06	0.00013078	2193.02	2294.25	2915.52	2896.79
chr15:47845840-47849870	678.506	0.664539	0.137746	4.82439	1.4043e-06	0.000136562	501.63	547.264	818.631	846.501
chr2:120287144-120289708	342.909	0.952138	0.197781	4.8141	1.47862e-06	0.000143444	241.168	226.943	410.523	493.003
chr11:62447183-62450488	399.868	0.879138	0.182927	4.80595	1.54018e-06	0.000149058	250.815	310.865	520.8	516.991
chr23:7478960-7483912	502.321	0.754654	0.15708	4.80428	1.5531e-06	0.000149949	377.83	369.964	644.762	616.728
chr14:34552450-34553574	280.597	1.15816	0.24114	4.80285	1.56422e-06	0.000150661	135.054	210.395	353.372	423.566
chr14:64223866-64226633	460.669	0.812502	0.169264	4.8002	1.58503e-06	0.000152303	305.48	361.69	573.927	601.578
chr13:44576963-44578104	172.737	1.28379	0.267908	4.7919	1.65207e-06	0.000158368	104.506	96.9236	247.119	242.399
chr1:67008967-67010623	141.03	1.44213	0.301066	4.79008	1.66715e-06	0.000159434	78.7816	73.2837	192.382	219.674
chr1:111927855-111930273	129.67	1.62986	0.340396	4.78812	1.68353e-06	0.00016062	57.8804	68.5557	156.16	236.086
chr25:9498213-9499546	170.264	1.3235	0.276516	4.78632	1.69863e-06	0.000161678	90.0361	104.016	223.775	263.23
chr10:80612456-80615080	301.925	0.971883	0.203109	4.78502	1.70967e-06	0.000161965	199.366	208.031	417.767	382.535
chr5:30149884-30155345	1056.39	0.532517	0.111287	4.78505	1.70941e-06	0.000161965	840.873	885.314	1253.3	1246.08
chr10:10610644-10618245	831.15	0.602518	0.126299	4.77057	1.83706e-06	0.000173625	688.133	633.549	973.985	1028.93
chr20:35357386-35369108	1442.4	0.487517	0.102402	4.76082	1.92808e-06	0.000181803	1127.06	1271.83	1719.37	1651.34
chr3:26364755-26366699	148.181	1.39093	0.292361	4.75757	1.95934e-06	0.000184184	81.9972	81.5576	227.8	201.368
chr6:36346633-36347872	69.3652	2.17057	0.456266	4.75725	1.96246e-06	0.000184184	25.7246	24.8219	94.9837	131.93
chr4:66931001-66931991	105.586	1.74208	0.36647	4.75368	1.99747e-06	0.000187034	57.8804	40.1878	142.476	181.799
chr14:61628952-61635068	2276.57	0.396295	0.0834116	4.75107	2.02342e-06	0.000189026	1935.78	1994.03	2683.69	2492.79
chr19:21989148-21991385	251.264	1.07748	0.227065	4.74524	2.0826e-06	0.000194105	144.701	177.299	354.177	328.879
chr9:12938887-12942599	225.46	1.16171	0.245029	4.7411	2.12565e-06	0.000197661	135.054	143.021	348.542	275.223
chr25:26306904-26309287	287.341	0.986793	0.208175	4.74021	2.13495e-06	0.000198069	204.189	182.027	374.3	388.848
chr8:11736442-11737464	117.029	1.70864	0.360771	4.73608	2.17897e-06	0.00020169	38.5869	69.7377	198.822	160.968
chr16:51461331-51463992	430.207	0.817146	0.173153	4.7192	2.36773e-06	0.00021866	311.911	310.865	583.586	514.466
chr25:9591976-9593479	111.174	1.67172	0.354342	4.71781	2.38397e-06	0.000219657	65.9193	41.3698	168.234	169.174
chr1:56944849-56945193	68.3018	2.23421	0.473906	4.71446	2.42351e-06	0.000222791	32.1558	16.5479	124.767	99.7369
chr16:23581987-23584835	471.779	0.766513	0.162624	4.71339	2.43627e-06	0.000223455	347.282	351.052	614.979	573.803
chr7:43285936-43288279	619.874	-0.668173	0.141803	-4.71199	2.45306e-06	0.000224485	754.053	767.115	500.677	457.654
chr18:50035885-50038639	1570.22	0.496465	0.105398	4.71039	2.47239e-06	0.000225743	1258.9	1343.93	1979.36	1698.68
chr14:73913879-73921567	633.657	0.661495	0.140563	4.70604	2.52578e-06	0.000230097	483.944	497.62	761.48	791.583
chr8:86842316-86843636	109.323	1.60731	0.341867	4.70157	2.58169e-06	0.00023466	56.2726	52.0078	158.574	170.436
chr23:25730553-25732297	139.439	1.5449	0.329004	4.6957	2.65696e-06	0.00024096	49.8414	91.0136	206.066	210.836
chr15:42142027-42145012	953.217	0.54972	0.117265	4.68785	2.76086e-06	0.000249821	746.014	800.21	1143.02	1123.62
chr16:63644764-63647700	212.377	1.16603	0.248945	4.68388	2.81499e-06	0.000254149	144.701	118.199	272.877	313.729
chr16:1525649-1527335	250.581	1.05448	0.22587	4.66853	3.03357e-06	0.000273271	151.132	173.753	357.396	320.042
chr6:86091412-86093221	281.123	1.03415	0.221749	4.66359	3.10733e-06	0.000278672	184.896	184.391	331.638	423.566
chr8:9423876-9427962	294.477	0.95192	0.204097	4.66405	3.10049e-06	0.000278672	192.935	208.031	385.569	391.373
chr15:62853049-62864203	1269.57	0.500579	0.107424	4.65985	3.16443e-06	0.000282805	1072.39	1030.7	1565.62	1409.57
chr23:27781139-27784373	534.872	0.761921	0.163515	4.65965	3.16743e-06	0.000282805	438.926	356.962	639.128	704.471
chr12:18509238-18511705	213.381	1.12056	0.240834	4.65285	3.27377e-06	0.000291655	130.231	138.293	303.465	281.536
chr2:118242269-118246245	273.787	1.08355	0.232914	4.65214	3.28514e-06	0.000292023	139.878	209.213	379.935	366.123
chr10:20996844-21000263	163.925	1.40764	0.302709	4.65015	3.31691e-06	0.000294199	112.545	68.5557	218.945	255.655
chr19:18975559-18979080	698.924	0.632143	0.136012	4.64771	3.35635e-06	0.000297044	556.295	540.172	883.026	816.201
chr10:88773358-88776091	249.233	1.06188	0.228736	4.64238	3.44415e-06	0.000304148	172.033	151.295	363.031	310.573
chr11:103617098-103619558	339.578	1.00503	0.217091	4.62955	3.66462e-06	0.00032291	273.324	180.845	433.866	470.278
chr1:57074772-57078325	538.94	0.734903	0.158768	4.62879	3.67807e-06	0.00032339	401.947	406.606	726.062	621.146
chr23:28053847-28055747	307.72	0.960583	0.207822	4.62214	3.79797e-06	0.000333206	184.896	231.671	392.009	422.304
chr13:58488220-58513398	6897.3	-0.263308	0.0569856	-4.6206	3.82626e-06	0.00033496	7464.96	7582.5	6427.5	6114.25
chr5:30123738-30129806	2187.44	0.373956	0.0810078	4.6163	3.90649e-06	0.000341243	1911.66	1899.47	2482.46	2456.18
chrX:119458222-119460273	221.047	1.09742	0.23785	4.61389	3.95202e-06	0.000344474	151.132	131.201	293.806	308.048
chr28:18061874-18065363	445.396	0.810261	0.175801	4.60895	4.04704e-06	0.000351997	294.225	351.052	602.905	533.403
chr4:113913461-113915134	144.227	1.36203	0.296679	4.59092	4.41307e-06	0.000383007	78.7816	82.7396	193.187	222.199
chr18:25048960-25051816	121.311	1.48279	0.323191	4.58795	4.47622e-06	0.000387654	62.7037	65.0097	188.358	169.174
chr29:663582-665945	228.913	1.09073	0.237933	4.58421	4.55716e-06	0.000393819	139.878	152.477	284.951	338.348
chr23:7192723-7198268	326.256	0.890726	0.194338	4.58339	4.57498e-06	0.000394514	231.521	225.761	438.696	409.048
chr5:115649150-115654784	1287.73	-0.460038	0.100385	-4.58276	4.58888e-06	0.000394869	1498.46	1484.59	1071.38	1096.47
chr4:92709013-92710110	127.355	-1.39359	0.304296	-4.57973	4.65578e-06	0.000399773	197.758	171.389	70.8353	69.4371
chr23:27187371-27188536	185.234	1.21155	0.264647	4.578	4.6945e-06	0.000402242	110.937	112.289	284.146	233.561
chr12:18873056-18876171	396.894	0.908294	0.198479	4.57627	4.73345e-06	0.000403865	231.521	317.957	560.243	477.853
chr28:41966955-41971634	787.608	0.60067	0.131255	4.57634	4.73174e-06	0.000403865	628.645	622.911	1003.77	895.107
chr3:100204302-100205959	248.425	1.03374	0.225999	4.57409	4.78287e-06	0.00040722	147.916	177.299	327.613	340.873
chr29:40985920-40989808	532.855	0.70784	0.154769	4.57354	4.79547e-06	0.000407434	427.672	382.966	650.397	670.384
chr25:16414905-16444267	6015.83	0.270951	0.059322	4.56746	4.9368e-06	0.00041856	5304.09	5597.93	6522.48	6638.82
chr23:7486077-7488588	545.502	0.699433	0.153291	4.56277	5.04824e-06	0.000427111	427.672	404.242	704.328	645.765
chr19:14895450-14897243	524.58	0.729595	0.160219	4.55374	5.27005e-06	0.000444944	368.183	419.608	690.644	619.884
chr6:55639955-55642476	240.852	1.20215	0.264117	4.55158	5.32434e-06	0.00044859	165.602	127.655	268.047	402.104
chr29:45326440-45333780	764.603	-0.578284	0.127136	-4.54855	5.40175e-06	0.000454163	893.93	937.322	608.54	618.621
chr20:39218708-39231328	1571.8	0.4262	0.0937514	4.54606	5.46588e-06	0.0004586	1334.46	1347.47	1840.91	1764.33
chr3:86859801-86861446	157.702	1.28013	0.282079	4.5382	5.67374e-06	0.000475052	98.0751	86.2856	231.825	214.624
chr23:25831030-25832750	219.392	1.13084	0.249363	4.53493	5.76216e-06	0.000481457	118.976	154.841	326.003	277.748
chr1:2342957-2345095	295.788	0.969053	0.213798	4.53256	5.82724e-06	0.000485888	226.698	174.935	377.52	403.998
chr11:87194058-87211538	4669.62	-0.2951	0.0651173	-4.53181	5.84791e-06	0.000486606	4953.59	5334.34	4174.45	4216.09
chr4:51283945-51284545	74.2266	1.95323	0.431174	4.53002	5.8977e-06	0.00048974	28.9402	31.9139	102.228	133.824
chr23:28620043-28620655	82.3158	1.87462	0.413963	4.52847	5.94116e-06	0.000492336	27.3324	42.5518	116.717	142.662
chr3:33615022-33616671	450.205	0.756601	0.167231	4.52428	6.06004e-06	0.000501158	315.126	353.416	566.682	565.597
chr13:17747697-17752025	835.893	0.598736	0.132376	4.523	6.09685e-06	0.000503171	710.642	620.547	1061.72	950.657
chr4:78125094-78133179	1105.55	0.49539	0.109642	4.51823	6.23576e-06	0.000513585	885.891	947.96	1291.13	1297.21
chr11:102478798-102480870	261.322	1.00007	0.221598	4.51299	6.39189e-06	0.000525371	183.288	165.479	372.69	323.829
chr14:19690765-19692954	568.055	0.729421	0.16173	4.5101	6.47973e-06	0.000531509	371.399	481.072	699.499	720.252
chr10:37634929-37639669	751.469	0.634545	0.140746	4.50844	6.53071e-06	0.000534604	625.429	553.174	982.035	845.239
chr19:52236446-52238041	98.2252	1.656	0.36737	4.5077	6.55344e-06	0.000535379	43.4103	50.8258	164.209	134.455
chr7:49213133-49220092	1171.33	0.529573	0.117869	4.49289	7.02616e-06	0.000572838	890.714	1023.61	1470.64	1300.37
chr20:41407479-41410925	520.269	0.704939	0.156985	4.49048	7.10638e-06	0.00057821	406.77	385.33	614.174	674.802
chr16:26203243-26206805	922.841	0.536894	0.119725	4.4844	7.31203e-06	0.000593745	718.681	786.026	1088.29	1098.37
chr1:59047946-59048767	90.9918	1.70115	0.379607	4.48133	7.41797e-06	0.000599934	48.2336	37.8238	144.085	133.824
chr9:62717945-62726528	1020.61	0.507038	0.113142	4.48145	7.41364e-06	0.000599934	863.382	823.85	1180.05	1215.15
chr23:7153910-7156047	118.07	1.50101	0.335369	4.4757	7.61619e-06	0.000614733	70.7427	53.1898	186.748	161.599
chr21:57413137-57415525	258.771	0.982798	0.219668	4.47402	7.6762e-06	0.00061834	170.426	177.299	324.393	362.967
chr4:56664113-56665183	113.491	1.81114	0.404981	4.47216	7.74338e-06	0.000622509	25.7246	73.2837	161.794	193.161
chr3:15980530-15983573	261.626	1.02049	0.228305	4.46986	7.82725e-06	0.000628001	199.366	147.749	342.102	357.285
chr29:43603936-43646045	24847.5	0.268755	0.0601395	4.46885	7.86408e-06	0.000629704	21337	23733.3	28490.3	25829.3
chr15:43096857-43099710	1036.96	0.499809	0.111859	4.4682	7.88794e-06	0.000630364	853.735	864.038	1236.4	1193.69
chr5:115644839-115646852	761.148	-0.602898	0.13496	-4.46723	7.92385e-06	0.000631982	901.969	932.594	652.007	558.022
chr3:15380925-15383194	665.857	0.617247	0.138339	4.46186	8.12527e-06	0.000646769	540.217	511.804	783.213	828.195
chr10:36304777-36307197	595.117	0.650745	0.145912	4.45985	8.20154e-06	0.000651555	483.944	443.248	734.916	718.358
chr3:104311590-104313488	178.487	1.17845	0.265229	4.44316	8.86467e-06	0.000702852	101.291	117.017	237.459	258.18
chr18:51961854-51965540	473.026	0.761199	0.171344	4.44253	8.89066e-06	0.00070353	361.752	340.414	649.592	540.347
chr5:60763195-60764258	181.461	1.22921	0.277597	4.42803	9.50961e-06	0.000751036	99.6828	117.017	218.141	291.005
chr23:25818855-25820242	92.9517	1.66602	0.376603	4.4238	9.69784e-06	0.000762916	40.1947	48.4618	153.745	129.405
chr3:105749650-105752934	266.253	0.964977	0.218122	4.42403	9.68767e-06	0.000762916	196.15	165.479	360.616	342.767
chr19:12768599-12771914	411.289	0.777849	0.176009	4.41937	9.89893e-06	0.00077722	324.773	282.497	509.531	528.353
chr21:33534093-33545813	1334.42	-0.450195	0.101886	-4.41861	9.934e-06	0.000778459	1545.08	1537.78	1079.43	1175.38
chr10:79973948-79986362	926.464	0.537688	0.121717	4.41753	9.98365e-06	0.000780834	739.582	771.843	1042.41	1152.02
chr5:57004838-57006182	180.996	1.16863	0.264602	4.41655	1.0029e-05	0.000782863	120.584	102.834	263.218	237.349
chr8:44221514-44223764	459.835	0.778594	0.176326	4.41564	1.00712e-05	0.000784637	305.48	369.964	625.444	538.453
chr2:125661055-125663887	267.458	0.941955	0.213507	4.41182	1.02507e-05	0.000797089	188.111	178.481	345.322	357.917
chr2:79587415-79587994	109.504	1.55451	0.352683	4.40767	1.0449e-05	0.000810944	46.6258	63.8277	181.113	146.449
chr13:40623668-40626906	228.202	1.0471	0.237673	4.40564	1.0547e-05	0.000815413	152.74	145.385	280.121	334.561
chr20:62752113-62755140	404.704	0.786404	0.178489	4.4059	1.05345e-05	0.000815413	279.755	313.229	538.509	487.322
chr29:45633600-45640609	1992.07	0.376686	0.0855175	4.40478	1.0589e-05	0.000817091	1686.57	1778.9	2229.7	2273.12
chr28:18528797-18530255	102.002	1.59395	0.362035	4.40275	1.06885e-05	0.000821631	48.2336	53.1898	133.621	172.961
chr9:87871862-87873333	150.461	1.35449	0.307627	4.40303	1.06749e-05	0.000821631	86.8205	82.7396	177.893	254.392
chrX:30624602-30633235	581.364	0.711064	0.161532	4.40201	1.07252e-05	0.00082288	491.983	392.422	675.35	765.702
chr24:503318-507512	2090.6	0.448528	0.102192	4.38908	1.13829e-05	0.000871685	1672.1	1860.46	2630.57	2199.26
chr4:8392773-8393951	97.0374	1.65428	0.37696	4.38847	1.14152e-05	0.000872506	57.8804	36.6418	140.866	152.762
chr24:57348720-57356164	876.954	0.535458	0.122151	4.38359	1.16737e-05	0.000890576	731.543	700.923	1069.77	1005.58
chr13:77356429-77360528	258.458	0.983478	0.224593	4.37893	1.19262e-05	0.000907029	183.288	164.297	371.885	314.361
chr26:18515889-18516500	74.1864	1.84506	0.421363	4.37878	1.19343e-05	0.000907029	35.3713	29.5499	111.888	119.937
chr14:2993040-2993870	159.98	1.26275	0.288504	4.37687	1.20397e-05	0.000913317	90.0361	98.1056	198.017	253.761
chrUn_NW_020190728v1:2406-2773	173.448	-1.29001	0.295323	-4.36812	1.25323e-05	0.000948901	260.462	232.853	74.86	125.618
chr13:61807363-61820267	1414.18	0.439121	0.100579	4.36595	1.26573e-05	0.000956575	1260.51	1142.99	1628.41	1624.83
chr27:29193778-29196812	515.61	0.741428	0.170159	4.35726	1.31698e-05	0.00099261	381.046	391.24	569.902	720.252
chr5:36218539-36219292	101.114	1.56851	0.359995	4.35704	1.31833e-05	0.00099261	43.4103	57.9177	158.574	144.555
chr5:60766312-60768326	247.09	0.97421	0.223684	4.3553	1.32887e-05	0.000998682	176.857	157.205	320.369	333.929
chr1:49924723-49927441	214.069	1.06334	0.24418	4.35474	1.33224e-05	0.000999356	128.623	147.749	309.1	270.805
chr14:2971602-2973636	308.802	0.992221	0.228053	4.35084	1.3562e-05	0.00101544	159.171	251.765	408.913	415.36
chr1:79191406-79195116	309.124	0.89216	0.205088	4.35014	1.36053e-05	0.0010168	192.935	238.763	397.644	407.154
chr18:62104261-62106543	320.141	-0.840948	0.193508	-4.3458	1.38767e-05	0.00103516	418.025	404.242	216.531	241.767
chr10:38332211-38334823	314.388	0.919624	0.211671	4.34459	1.39539e-05	0.001039	189.719	243.491	444.331	380.01
chr20:40307578-40309341	97.7041	1.6216	0.373367	4.34319	1.40432e-05	0.00103909	56.2726	40.1878	161.794	132.562
chr5:77942241-77951818	1694.6	0.397661	0.0915528	4.34352	1.40217e-05	0.00103909	1509.71	1417.21	1914.16	1937.29
chr9:12947135-12950679	251.371	1.06118	0.244346	4.34295	1.40581e-05	0.00103909	136.662	187.937	300.245	380.642
chrX:67263948-67265946	283.435	0.958027	0.220546	4.34388	1.39987e-05	0.00103909	220.267	166.661	354.177	392.635
chr17:2811940-2812971	98.5032	1.59751	0.368525	4.33487	1.45843e-05	0.00107601	41.8025	55.5538	134.426	162.23
chr3:102053415-102055343	217.893	1.02991	0.237631	4.33409	1.46366e-05	0.0010779	151.132	135.929	286.561	297.948
chr25:9439044-9441037	446.915	0.736046	0.170207	4.32442	1.52937e-05	0.00112424	308.695	360.508	569.902	548.553
chr6:36350325-36351717	67.0955	1.92113	0.444422	4.32276	1.54088e-05	0.00113064	28.9402	27.1859	111.888	100.368
chr10:43546676-43554385	549.253	0.661964	0.153235	4.31992	1.56086e-05	0.00114322	413.201	437.338	640.738	705.733
chr2:22554041-22556504	186.172	1.11565	0.258366	4.31808	1.5739e-05	0.00115068	127.015	108.744	255.168	253.761
chrX:57950571-57952007	118.684	1.44303	0.334225	4.31755	1.5777e-05	0.00115138	67.5271	60.2817	194.797	152.13
chr23:17284314-17286997	361.883	-0.861396	0.199625	-4.31506	1.59557e-05	0.00116232	503.238	430.246	290.586	223.461
chr5:36615474-36617114	403.735	0.756918	0.175532	4.31213	1.61687e-05	0.00117571	297.441	302.591	528.85	486.06
chr3:23741957-23744418	583.212	-0.693327	0.161277	-4.29898	1.71589e-05	0.00124324	628.645	810.848	462.844	430.51
chr7:44980937-44982051	265.169	-0.975261	0.226843	-4.29928	1.71354e-05	0.00124324	348.89	353.416	206.871	151.499
chr23:28723997-28724895	344.924	0.862987	0.200852	4.29663	1.73412e-05	0.00125419	279.755	211.577	433.866	454.497
chr22:10611516-10619791	656.437	1.66818	0.388444	4.29452	1.75075e-05	0.00126395	400.339	229.307	980.425	1015.68
chr6:68919405-68922230	173.715	1.16698	0.27182	4.2932	1.76118e-05	0.00126921	101.291	112.289	261.608	219.674
chr26:8800034-8803909	375.607	0.786167	0.183185	4.29166	1.7734e-05	0.00127574	257.246	293.135	486.188	465.86
chr3:14081280-14089002	2235.82	-0.369045	0.086055	-4.28848	1.799e-05	0.00129185	2474.39	2563.75	2051.81	1853.34
chr23:27583625-27585427	230.918	1.0109	0.235909	4.28513	1.82632e-05	0.00130915	135.054	170.207	309.1	309.311
chr5:20245552-20246421	104.689	1.58709	0.370503	4.28361	1.83889e-05	0.00131581	62.7037	42.5518	180.308	133.193
chr19:26614473-26622797	1472.36	0.429216	0.100299	4.27935	1.87441e-05	0.00133886	1289.45	1221	1763.64	1615.36
chr5:70338899-70340361	368.323	0.783715	0.183493	4.27108	1.94531e-05	0.00138705	255.638	284.861	470.089	462.704
chr8:98164191-98167490	419.618	0.738487	0.172949	4.26996	1.95505e-05	0.00139153	295.833	332.141	532.875	517.622
chr1:79187373-79188644	117.623	1.45456	0.341006	4.26549	1.9946e-05	0.00141719	77.1738	49.6438	173.868	169.805
chr10:67534522-67540156	656.064	0.632119	0.148341	4.26127	2.03266e-05	0.00144169	565.941	465.706	766.309	826.301
chr24:60885575-60886964	133.451	1.30197	0.306181	4.25227	2.11612e-05	0.00149825	83.605	70.9197	186.748	192.53
chr21:23197507-23199027	160.14	1.17722	0.277016	4.24965	2.14103e-05	0.00151323	93.2517	102.834	219.75	224.724
chr11:72663818-72665728	192.805	1.19953	0.282509	4.24599	2.17632e-05	0.00152747	91.6439	140.657	303.465	235.455
chr18:49085573-49092766	945.827	0.495867	0.116763	4.24677	2.16875e-05	0.00152747	797.463	773.025	1086.68	1126.14
chr7:43278097-43281597	778.552	-0.538595	0.126845	-4.24609	2.17534e-05	0.00152747	946.987	898.316	620.614	648.29
chrX:102928318-102938007	899.048	0.538126	0.126737	4.246	2.17624e-05	0.00152747	696.172	769.479	1003.77	1126.77
chr12:18035911-18048340	1676.06	0.399482	0.0941071	4.24497	2.18625e-05	0.00153178	1379.48	1509.41	1875.53	1939.82
chr13:32187182-32190638	529.639	0.654693	0.154265	4.24394	2.19629e-05	0.00153615	405.163	417.244	673.74	622.409
chr27:44317715-44319235	154.328	1.21024	0.285244	4.24282	2.20726e-05	0.00154115	85.2128	100.47	224.58	207.049
chr16:80868093-80872207	457.365	-0.694286	0.163766	-4.23949	2.24031e-05	0.00156152	594.882	536.626	341.297	356.654
chr24:26293715-26295238	122.271	1.45128	0.342423	4.23828	2.25241e-05	0.00156725	61.0959	69.7377	144.89	213.361
chr18:11777368-11779217	310.367	0.837662	0.198077	4.22898	2.34753e-05	0.0016302	217.051	228.125	390.399	405.891
chr4:78936983-78937859	86.0175	1.656	0.391614	4.22865	2.35096e-05	0.0016302	46.6258	36.6418	140.866	119.937
chr7:96060760-96062412	190.643	1.09162	0.258308	4.22604	2.37835e-05	0.00164636	127.015	117.017	238.264	280.273
chr13:11842105-11843623	233.483	0.968497	0.229239	4.22485	2.39105e-05	0.00165232	157.563	158.387	295.415	322.567
chr10:35217831-35218913	202.906	1.09125	0.258334	4.22419	2.39806e-05	0.00165433	147.916	112.289	297.025	254.392
chr26:17144497-17145739	97.5066	1.58595	0.375944	4.21859	2.45835e-05	0.00169303	51.4492	46.0978	170.649	121.831
chr14:41944315-41945169	95.025	1.57433	0.373714	4.21267	2.52367e-05	0.00173506	41.8025	53.1898	156.965	128.143
chr25:9599123-9600339	69.6935	1.81864	0.431799	4.21178	2.53365e-05	0.00173895	32.1558	29.5499	107.863	109.206
chr12:14679591-14683746	774.983	0.56631	0.134907	4.19778	2.69539e-05	0.00184682	612.567	635.913	991.694	859.757
chr1:2216193-2219923	481.401	0.680357	0.162155	4.19573	2.7199e-05	0.00186046	374.615	365.236	621.419	564.334
chr21:65269845-65271030	79.8226	1.85397	0.441912	4.19534	2.7246e-05	0.00186052	46.6258	23.6399	103.838	145.187
chr21:30538297-30542087	289.37	-0.882313	0.210481	-4.19189	2.76637e-05	0.00188585	395.516	355.78	182.723	223.461
chr5:104173589-104175859	325.582	0.925357	0.221077	4.18569	2.84305e-05	0.00193486	265.285	185.573	467.674	383.798
chr5:83815509-83820583	992.289	0.477659	0.114168	4.18381	2.86664e-05	0.00194763	821.58	836.852	1177.64	1133.09
chr5:75988273-75990516	335.3	0.793675	0.189878	4.17992	2.91614e-05	0.00197793	245.992	244.673	428.232	422.304
chr25:2390370-2392491	894.051	0.533688	0.127691	4.17953	2.92111e-05	0.00197798	676.879	782.48	1013.43	1103.42
chr2:89727091-89727772	80.3543	1.7178	0.411585	4.17362	2.99796e-05	0.00202322	30.548	43.7338	136.036	111.099
chr21:67247072-67251912	476.539	-0.710218	0.170163	-4.17376	2.9961e-05	0.00202322	562.726	620.547	325.198	397.685
chr15:63513557-63520289	1110.35	0.505458	0.121157	4.17192	3.02039e-05	0.00203495	887.499	947.96	1191.32	1414.62
chr18:39741214-39743387	535.843	0.646378	0.154975	4.17084	3.03479e-05	0.00204125	409.986	425.518	619.809	688.058
chr18:2380239-2382229	157.096	1.18231	0.283507	4.17029	3.04217e-05	0.00204281	90.0361	101.652	233.435	203.261
chr10:36310982-36314235	668.635	0.582115	0.139729	4.16602	3.09967e-05	0.00207797	504.845	564.993	787.238	817.464
chr1:67030016-67033221	187.958	1.10377	0.264995	4.16524	3.11019e-05	0.00207811	138.27	101.652	254.363	257.548
chr26:15911512-15912501	75.4695	1.99175	0.478172	4.16534	3.10883e-05	0.00207811	14.4701	44.9158	108.668	133.824
chr20:62709337-62711329	194.045	1.18453	0.284465	4.16406	3.12636e-05	0.00208546	85.2128	150.113	265.632	275.223
chr20:66478313-66479120	74.0842	-1.71851	0.413232	-4.15871	3.20052e-05	0.00213141	94.8595	132.383	30.588	38.506
chr25:9765297-9767312	281.399	0.866185	0.208409	4.15617	3.23623e-05	0.00215164	209.012	190.301	361.421	364.86
chr1:144721136-144731333	1709.38	-0.376209	0.0905362	-4.15535	3.2479e-05	0.00215585	1966.32	1895.92	1522.15	1453.13
chr2:1918868-1923528	407.715	0.813539	0.195888	4.15309	3.28021e-05	0.002171	271.716	319.139	449.16	590.847
chr25:9909957-9912849	177.714	1.21098	0.291591	4.153	3.28148e-05	0.002171	122.192	93.3776	203.652	291.636
chr1:58517705-58521504	584.186	0.602658	0.145312	4.14734	3.36363e-05	0.0022217	458.22	469.252	712.378	696.896
chr18:56580174-56581934	160.364	1.19601	0.288458	4.14624	3.37985e-05	0.00222877	86.8205	107.562	199.627	247.449
chr9:38848541-38851861	1918.84	-0.361193	0.087141	-4.14492	3.39927e-05	0.00223792	2099.77	2213.88	1718.56	1643.13
chr22:34949227-34954247	604.557	0.614186	0.14825	4.1429	3.42935e-05	0.00225405	511.277	445.612	751.82	709.521
chr2:95846997-95850678	645.037	0.644822	0.15569	4.1417	3.44734e-05	0.00226219	434.103	569.721	772.749	803.577
chr4:9617382-9619319	324.988	0.808938	0.195616	4.13534	3.54424e-05	0.00232199	241.168	231.671	392.814	434.297
chr5:71124467-71125719	106.05	1.41322	0.34196	4.1327	3.5852e-05	0.00234502	57.8804	57.9177	153.745	154.655
chr1:2348445-2349428	121.159	1.43734	0.347957	4.13081	3.6149e-05	0.00236063	65.9193	65.0097	138.451	215.255
chr12:83641148-83642097	103.195	1.4549	0.352353	4.12911	3.64178e-05	0.00237433	61.0959	49.6438	159.379	142.662
chr18:49103591-49108877	1087.88	0.486147	0.117796	4.12704	3.67465e-05	0.0023919	834.442	975.146	1307.23	1234.72
chr10:33710402-33713743	304.77	0.859699	0.20844	4.12445	3.71625e-05	0.00241508	209.012	223.397	430.646	356.023
chr13:44540899-44544962	896.051	0.500335	0.121354	4.12293	3.74087e-05	0.00242717	712.25	770.661	1072.99	1028.3
chr5:29646033-29648869	400.324	0.716835	0.173985	4.1201	3.78709e-05	0.00245322	300.656	304.955	498.262	497.422
chr8:112917550-112919003	199.508	1.03482	0.251377	4.11661	3.8449e-05	0.00248668	136.662	125.291	287.366	248.711
chr19:15035357-15037495	395.794	0.735628	0.178834	4.11346	3.8977e-05	0.00251679	274.932	317.957	496.652	493.635
chr7:12614514-12623322	4449.76	-0.302713	0.0736298	-4.11129	3.93462e-05	0.00253657	5249.43	4584.96	4008.63	3956.02
chr19:15016271-15020039	633.986	0.578653	0.140815	4.10933	3.96815e-05	0.00255411	527.354	490.528	763.089	754.971
chrX:52393782-52396182	190.389	1.04521	0.254518	4.10665	4.01445e-05	0.0025798	120.584	127.655	269.657	243.661
chr18:39026038-39029206	524.769	0.630495	0.153601	4.10476	4.04732e-05	0.00259678	398.731	424.336	644.762	631.246
chr18:6141571-6142599	121.095	1.31758	0.321936	4.09268	4.26412e-05	0.00272903	73.9582	65.0097	181.918	163.493
chr24:36951562-36952906	153.826	1.19248	0.29138	4.09253	4.26696e-05	0.00272903	78.7816	107.562	209.286	219.674
chr16:51927334-51931965	899.72	0.518576	0.126773	4.09059	4.30278e-05	0.00274758	676.879	800.21	1048.04	1073.75
chr1:137381775-137382678	254.526	0.950235	0.232337	4.08989	4.31571e-05	0.00275148	144.701	200.939	337.273	335.192
chr22:32430994-32433422	179.104	1.13609	0.277826	4.08922	4.32825e-05	0.00275513	115.761	108.744	208.481	283.43
chr25:3525302-3534496	1414.97	-0.423045	0.103489	-4.0878	4.35477e-05	0.00276329	1609.4	1633.52	1131.75	1285.22
chr3:87030271-87031996	132.096	1.24491	0.304518	4.08813	4.34866e-05	0.00276329	78.7816	78.0117	189.162	182.43
chr3:103307955-103312402	735.931	-0.559422	0.136928	-4.08552	4.39787e-05	0.00278626	842.481	911.318	552.998	636.928
chr19:8750196-8751927	394.129	0.734914	0.180583	4.06967	4.708e-05	0.00297807	270.108	320.321	491.822	494.266
chr23:7265047-7267688	163.952	1.13795	0.27978	4.06729	4.75633e-05	0.00300393	99.6828	105.198	202.847	248.08
chr15:73476788-73477428	73.5027	1.72972	0.425503	4.06511	4.80088e-05	0.00302426	27.3324	40.1878	113.497	112.993
chr19:7934298-7938844	638.078	0.721228	0.177424	4.06499	4.8035e-05	0.00302426	585.235	381.784	811.386	773.908
chr28:26475650-26478694	529.139	0.627514	0.154503	4.0615	4.87576e-05	0.00306497	411.594	419.608	670.521	614.834
chr1:69137176-69139225	105.249	1.62681	0.400809	4.05882	4.93215e-05	0.00307804	30.548	70.9197	181.918	137.612
chr1:79527453-79528813	134.886	1.26878	0.312607	4.0587	4.93468e-05	0.00307804	67.5271	89.8316	206.066	176.118
chr13:69684409-69691556	825.354	0.542836	0.133729	4.05921	4.92389e-05	0.00307804	614.175	726.927	1022.28	938.032
chr28:8621692-8625469	455.496	0.747153	0.184024	4.06008	4.90556e-05	0.00307804	282.971	394.786	572.317	571.909
chr3:15319592-15320999	296.749	0.828244	0.204055	4.05893	4.92979e-05	0.00307804	225.09	203.303	367.861	390.741
chr17:12597038-12598960	375.896	0.749705	0.184877	4.05516	5.00991e-05	0.00312014	255.638	303.773	478.943	465.229
chr26:42206084-42211088	630.01	0.575392	0.141937	4.05385	5.03807e-05	0.00313284	527.354	485.8	740.551	766.333
chr25:28375860-28380498	1017.13	0.487133	0.120281	4.04996	5.12255e-05	0.00318047	826.403	867.584	1107.61	1266.91
chr14:982438-983864	147.089	-1.17437	0.290028	-4.04917	5.13991e-05	0.00318325	184.896	222.215	99.8134	81.4308
chr20:62702733-62706376	545.675	0.611548	0.151035	4.04904	5.14279e-05	0.00318325	442.142	421.972	643.152	675.434
chr2:1042982-1050692	1038.57	0.478368	0.118157	4.04857	5.15315e-05	0.00318477	927.694	810.848	1172.81	1242.92
chr10:65350426-65351659	307.256	0.827543	0.204654	4.04363	5.26304e-05	0.00324771	244.384	199.757	396.034	388.848
chr13:81138401-81142107	761.709	0.542524	0.134228	4.0418	5.30415e-05	0.00326808	586.843	652.461	861.293	946.238
chr2:44834597-44836310	94.7586	1.46609	0.363049	4.03827	5.38471e-05	0.00331266	49.8414	50.8258	143.281	135.087
chr5:74682011-74683230	154.67	1.16391	0.288414	4.03557	5.44704e-05	0.00334591	107.722	83.9216	223.775	203.261
chr3:33618079-33618848	69.1427	1.99553	0.494851	4.03259	5.51662e-05	0.0033835	12.8623	41.3698	103.033	119.306
chr2:106359412-106360631	177.509	1.07478	0.266592	4.03154	5.54122e-05	0.00339343	101.291	126.473	239.874	242.399
chr4:31828557-31844083	1964.11	0.35677	0.0885234	4.03023	5.57216e-05	0.00340721	1688.18	1756.44	2121.03	2290.79
chr12:15154303-15158026	621.384	0.568291	0.141286	4.02227	5.76409e-05	0.00351924	488.768	511.804	741.356	743.608
chr5:1347089-1350320	623.642	0.606577	0.150826	4.02169	5.77826e-05	0.00352256	458.22	529.534	705.133	801.683
chr5:34209353-34214706	859.107	0.499319	0.124568	4.00842	6.11271e-05	0.00372082	692.957	730.473	965.131	1047.87
chr24:41709440-41711843	178.093	1.09495	0.273436	4.00442	6.21693e-05	0.00377856	101.291	125.291	218.141	267.648
chr15:13981346-13982301	89.0795	1.54929	0.387052	4.0028	6.2597e-05	0.00379884	43.4103	47.2798	113.497	152.13
chr29:25751139-25751925	71.9453	1.7331	0.433019	4.00236	6.27142e-05	0.00380023	38.5869	28.3679	122.352	98.4744
chr3:99757477-99758619	101.717	1.58067	0.395001	4.00168	6.28931e-05	0.00380537	38.5869	62.6457	117.522	188.111
chr7:51723623-51725199	192.758	1.02473	0.256106	4.00118	6.30284e-05	0.00380784	112.545	140.657	258.388	259.442
chr13:42074695-42077702	386.309	0.718118	0.179517	4.00027	6.32707e-05	0.00381378	307.087	277.769	492.627	467.753
chr9:34427145-34435450	1056.92	0.444461	0.111112	4.0001	6.33156e-05	0.00381378	871.421	918.41	1213.86	1223.99
chr16:80879375-80881577	243.015	-0.899312	0.224925	-3.99827	6.38067e-05	0.00383763	347.282	286.043	171.454	167.28
chr22:50420161-50421708	151.23	1.13898	0.284907	3.99771	6.39591e-05	0.00384107	98.0751	91.0136	215.726	200.105
chr22:10632839-10634863	88.1019	1.53872	0.384991	3.99677	6.42115e-05	0.00385049	53.057	37.8238	129.596	131.93
chr27:15113811-15114695	101.403	-1.34854	0.337479	-3.99591	6.44454e-05	0.00385879	149.524	141.839	55.5413	58.7059
chr5:112413175-112419407	529.575	-0.640704	0.160432	-3.99361	6.50749e-05	0.00388495	615.783	674.919	377.52	450.079
chr9:12934385-12938643	234.496	1.04648	0.26202	3.9939	6.4994e-05	0.00388495	112.545	191.483	305.075	328.879
chr23:28630196-28632766	286.361	0.836251	0.209527	3.99115	6.57546e-05	0.00391973	188.111	222.215	361.421	373.698
chr3:53527465-53529687	374.404	0.726542	0.182164	3.98839	6.65223e-05	0.00395964	299.049	265.949	469.284	463.335
chr26:9388480-9390086	111.83	1.34318	0.337181	3.98358	6.7886e-05	0.00403487	56.2726	69.7377	152.135	169.174
chr1:7951536-7953895	235.063	0.966392	0.24329	3.97217	7.12196e-05	0.00422678	141.485	176.117	276.097	346.554
chr5:74614704-74615355	150.017	1.20727	0.303992	3.97139	7.14547e-05	0.0042345	109.33	73.2837	193.992	223.461
chr1:69143263-69145214	138.985	1.17521	0.295989	3.97045	7.17366e-05	0.00424498	86.8205	83.9216	190.772	194.424
chr17:72988747-72995454	1056.05	-0.448909	0.113091	-3.96946	7.20344e-05	0.00425176	1268.54	1170.17	920.054	865.439
chr18:25055308-25057715	146.836	1.29093	0.325242	3.96912	7.21374e-05	0.00425176	109.33	62.6457	184.333	231.036
chr25:13550711-13553981	206.32	0.988054	0.248941	3.96903	7.21672e-05	0.00425176	131.839	144.203	298.635	250.605
chr12:14209420-14211044	182.99	1.15508	0.291262	3.96577	7.31606e-05	0.004304	81.9972	143.021	266.437	240.505
chr23:27571404-27578059	990.687	0.521363	0.131483	3.96525	7.33201e-05	0.0043071	847.304	780.117	1288.72	1046.61
chr15:58804025-58810828	1067.21	0.46786	0.118135	3.96037	7.48352e-05	0.00438972	834.442	955.052	1189.71	1289.64
chr11:10436866-10440987	254.055	0.90017	0.227397	3.95859	7.53936e-05	0.00441605	200.973	154.841	334.053	326.354
chr8:494838-496918	295.258	0.985887	0.249175	3.95661	7.60206e-05	0.00444234	255.638	143.021	404.888	377.485
chrX:37395250-37398221	221.807	-1.02602	0.259327	-3.95648	7.60626e-05	0.00444234	265.285	328.595	174.673	118.674
chr5:78381742-78384182	269.809	0.869889	0.219967	3.95463	7.66539e-05	0.00447041	213.836	169.025	357.396	338.979
chr1:141674226-141676068	161.514	1.09284	0.276576	3.95132	7.77224e-05	0.00452346	110.937	95.7416	225.385	213.992
chr14:2814411-2816533	233.062	0.912419	0.230927	3.95112	7.77878e-05	0.00452346	159.171	164.297	284.951	323.829
chr27:44361469-44362489	111.309	1.31686	0.333857	3.94438	8.00077e-05	0.00464586	61.0959	66.1917	165.819	152.13
chr11:101031773-101034319	404.173	0.77979	0.198094	3.93646	8.2694e-05	0.00479495	299.049	295.499	591.636	430.51
chr4:119564926-119567960	442.61	0.675346	0.171605	3.93547	8.30346e-05	0.00480779	310.303	369.964	544.144	546.028
chr24:58732183-58733355	106.641	1.40634	0.357681	3.93184	8.42989e-05	0.004874	45.0181	70.9197	146.5	164.124
chr6:19865261-19868727	555.704	0.596339	0.152108	3.9205	8.83658e-05	0.00510183	446.965	438.52	633.493	703.84
chr11:103485880-103488221	350.396	0.752169	0.1922	3.91346	9.09816e-05	0.00524535	234.737	286.043	442.721	438.085
chr3:19504258-19511872	961.577	-0.450807	0.115246	-3.91171	9.16441e-05	0.00527601	1078.83	1141.81	802.532	823.145
chr11:82974467-82975915	138.314	1.17088	0.299881	3.90448	9.44277e-05	0.0054208	78.7816	91.0136	182.723	200.736
chr8:107069397-107070794	122.398	1.2507	0.320308	3.90468	9.43515e-05	0.0054208	80.3894	65.0097	176.283	167.912
chr11:62363375-62364576	118.022	1.3027	0.333691	3.90391	9.46518e-05	0.00542594	61.0959	74.4657	187.553	148.974
chr2:72360720-72361530	81.9324	1.72568	0.442098	3.90339	9.48563e-05	0.00542995	24.1168	50.8258	150.525	102.262
chr3:23577877-23579053	99.189	-1.41012	0.361356	-3.9023	9.52816e-05	0.00544401	114.153	173.753	53.9314	54.9184
chrUn_NW_020192029v1:35158-35439	253.14	-1.05089	0.269317	-3.90207	9.53716e-05	0.00544401	369.791	314.411	117.522	210.836
chr11:96108187-96122808	9185.34	-0.213223	0.0546798	-3.89948	9.63978e-05	0.00549481	10178.9	9550.52	8587.98	8423.98
chr24:33057854-33068968	1787.47	-0.341828	0.0876859	-3.89833	9.68598e-05	0.00551336	1993.66	2002.3	1601.04	1552.87
chr7:15395790-15397577	173.168	-1.11715	0.286613	-3.89776	9.70852e-05	0.0055184	276.54	198.575	92.5689	124.987
chr15:58227980-58228780	96.8854	1.54431	0.396296	3.89686	9.74483e-05	0.00553126	65.9193	34.2778	126.377	160.968
chr4:47327794-47329740	106.801	1.32979	0.341476	3.89422	9.85138e-05	0.00558388	56.2726	65.0097	148.11	157.812
chr26:44130014-44131182	148.359	1.14197	0.293406	3.8921	9.93812e-05	0.00562514	102.898	82.7396	216.531	191.268
chr26:10674894-10675732	107.176	1.36307	0.350421	3.88981	0.000100321	0.00567038	48.2336	70.9197	156.16	153.393
chr15:35445933-35448787	418.824	0.788485	0.202764	3.88869	0.000100788	0.00568883	345.674	270.677	449.16	609.784
chr6:88658057-88660276	309.816	0.844704	0.217713	3.8799	0.000104498	0.00589	262.069	183.209	385.569	408.416
chr3:15972718-15975403	193.07	1.04736	0.269997	3.87916	0.000104816	0.00589969	143.093	109.926	226.995	292.267
chr3:117144687-117146707	258.426	-0.90883	0.234333	-3.87837	0.000105159	0.0059107	292.617	380.602	202.042	158.443
chr10:36725317-36726979	138.062	1.16774	0.301306	3.87558	0.000106369	0.00597045	83.605	86.2856	206.871	175.486
chr21:58702920-58703614	67.7987	1.71375	0.442231	3.87524	0.000106519	0.00597055	35.3713	28.3679	92.5689	114.887
chr25:3799652-3805129	899.675	0.49556	0.127913	3.87418	0.000106983	0.00598824	680.094	810.848	1032.75	1075.01
chr5:106810428-106812323	214.738	0.95954	0.247761	3.87284	0.000107573	0.0060129	123.8	166.661	282.536	285.955
chr29:26349130-26357078	1199.72	0.432747	0.111755	3.87228	0.000107822	0.00601851	961.457	1079.16	1320.92	1437.35
chr15:42146691-42147525	69.9054	1.67751	0.433531	3.86943	0.000109092	0.00608095	32.1558	34.2778	119.132	94.0557
chr13:27557891-27559557	192.658	0.990295	0.256199	3.86533	0.000110937	0.00617212	114.153	143.021	252.753	260.705
chr4:28397625-28399908	118.206	1.28705	0.332991	3.86512	0.000111033	0.00617212	80.3894	57.9177	157.77	176.749
chr7:52708453-52714573	649.798	-0.543215	0.140638	-3.8625	0.000112234	0.00623028	741.19	799.028	554.608	504.366
chr17:54425498-54427504	262.974	0.882727	0.228716	3.8595	0.000113621	0.00629821	154.348	213.941	342.102	341.504
chr19:33624087-33624889	74.7382	1.75209	0.454007	3.85918	0.000113769	0.00629821	22.509	44.9158	136.841	94.6869
chr23:28554979-28557305	142.786	1.15641	0.299781	3.85752	0.000114541	0.00633225	99.6828	78.0117	185.138	208.311
chr1:2870027-2870983	89.9972	1.45951	0.37854	3.85563	0.000115431	0.00637272	45.0181	50.8258	118.327	145.818
chr11:101091892-101094088	262.221	0.853396	0.221616	3.85079	0.000117737	0.00649116	192.935	180.845	367.056	308.048
chr25:9618626-9622436	530.381	0.59391	0.154258	3.8501	0.000118071	0.0065007	424.456	420.79	666.496	609.784
chr2:118199292-118200122	147.835	1.3105	0.340525	3.84846	0.00011886	0.00653521	117.369	54.3718	206.871	212.73
chr14:73747148-73751467	1004.42	0.43406	0.112824	3.84721	0.000119469	0.00655975	845.696	862.856	1152.68	1156.44
chr25:9530955-9532384	233.748	0.879812	0.228732	3.84647	0.00011983	0.00657061	173.641	156.023	309.904	295.423
chr29:12464693-12493995	3549.94	0.259962	0.0676202	3.84444	0.000120828	0.00660738	3247.73	3215.03	3837.18	3899.84
chr29:42997643-43017912	3773.45	-0.273416	0.0711193	-3.84447	0.000120812	0.00660738	4019.47	4239.81	3293.84	3540.66
chr15:52515929-52517236	142.889	1.14206	0.297115	3.84382	0.000121134	0.00661519	99.6828	79.1936	202.042	190.636
chr3:20367352-20368337	93.9012	1.39545	0.363263	3.84143	0.000122318	0.00666177	51.4492	52.0078	132.011	140.137
chr3:30727745-30728813	88.8698	1.45094	0.377686	3.84165	0.00012221	0.00666177	53.057	42.5518	133.621	126.249
chr19:51113168-51116974	1232.46	-0.406867	0.106003	-3.83826	0.000123907	0.00673924	1336.07	1472.77	1047.24	1073.75
chr25:37820693-37822189	168.981	1.02631	0.267613	3.83506	0.000125533	0.00681849	107.722	114.653	223.775	229.774
chr16:15739667-15740219	68.0355	1.67283	0.436825	3.82952	0.000128391	0.00696436	36.9791	28.3679	107.058	99.7369
chr6:57476594-57477825	390.056	0.737664	0.192643	3.82917	0.000128575	0.00696496	327.989	258.857	447.55	525.828
chr6:71769933-71774060	809.757	0.477074	0.124639	3.82765	0.000129373	0.00699878	672.055	682.011	930.518	954.444
chr11:106190678-106191951	137.815	-1.10546	0.288871	-3.82684	0.0001298	0.00701252	189.719	186.755	84.5194	90.2682
chr2:48310631-48311554	73.4302	1.6227	0.42446	3.82298	0.000131848	0.00711363	41.8025	30.7319	100.618	120.568
chr1:79151078-79153606	168.383	1.04231	0.272923	3.81908	0.000133953	0.0072079	101.291	118.199	240.679	213.361
chr20:62741780-62746076	690.35	0.549126	0.143775	3.81935	0.000133806	0.0072079	508.061	611.091	794.482	847.764
chr16:38933507-38934155	66.0236	1.68061	0.440199	3.81783	0.000134628	0.00723462	32.1558	30.7319	95.7887	105.418
chr6:113276315-113277430	109.719	1.28245	0.336021	3.81658	0.000135312	0.00726168	69.1349	59.0997	155.355	155.287
chr11:78626173-78627347	102.208	1.40141	0.36726	3.81585	0.000135713	0.00727354	70.7427	42.5518	149.72	145.818
chr19:21711003-21712208	82.445	1.49151	0.391137	3.81328	0.000137135	0.00734002	46.6258	40.1878	116.717	126.249
chr23:17291297-17292409	88.0909	-1.57193	0.412269	-3.81287	0.00013736	0.00734231	131.839	132.383	28.1731	59.9684
chr15:53908242-53921914	1941.52	0.38881	0.102092	3.80841	0.000139863	0.00746618	1604.57	1757.63	2013.98	2389.9
chr13:78356946-78358074	88.0633	1.58157	0.415425	3.80711	0.000140602	0.00749573	61.0959	28.3679	129.596	133.193
chr1:88772220-88773775	176.604	0.999759	0.262643	3.80653	0.00014093	0.0075033	110.937	124.109	239.069	232.299
chr23:28645620-28649370	294.479	0.799621	0.210106	3.80579	0.00014135	0.00751575	189.719	238.763	375.105	374.329
chr28:15899671-15901562	158.246	1.15311	0.303109	3.80428	0.000142217	0.00754616	122.192	75.6477	202.847	232.299
chr4:9621694-9623811	188.286	1.05568	0.277509	3.80414	0.000142296	0.00754616	98.0751	145.385	229.41	280.273
chr16:4421368-4425212	688.277	0.592294	0.155852	3.80035	0.000144493	0.00763669	591.666	507.076	920.859	733.508
chr4:102687381-102690920	244.778	0.896291	0.235853	3.80022	0.000144571	0.00763669	144.701	196.211	304.27	333.929
chr5:105745520-105748870	503.524	0.677876	0.178372	3.80035	0.000144491	0.00763669	323.165	449.158	597.27	644.502
chr3:117152888-117157303	609.417	-0.532912	0.140461	-3.79401	0.000148234	0.00781998	725.112	716.289	503.897	492.372
chr25:2290528-2305455	3121.62	0.284081	0.0749071	3.79245	0.000149171	0.00785913	2689.83	2937.26	3412.17	3447.24
chr18:55257634-55264949	1697.73	0.348861	0.0921178	3.78712	0.000152402	0.00801891	1538.65	1450.31	1860.23	1941.71
chr22:32436219-32438044	94.024	1.4738	0.389271	3.78607	0.000153052	0.00804258	38.5869	60.2817	117.522	159.705
chr3:15977213-15978596	114.408	1.46288	0.386461	3.78532	0.000153512	0.0080563	86.8205	36.6418	156.16	178.011
chr11:10435417-10436627	111.158	1.25654	0.332057	3.78411	0.000154261	0.00808508	67.5271	63.8277	152.94	160.337
chr2:120636493-120637864	275.476	0.835419	0.220809	3.78345	0.000154672	0.00809612	173.641	221.033	331.638	375.592
chr10:1040205-1044330	464.688	0.615708	0.162852	3.78078	0.000156341	0.00815173	355.321	378.238	551.388	573.803
chr5:19574666-19577376	453.972	0.632572	0.167308	3.78088	0.000156276	0.00815173	381.046	332.141	555.413	547.291
chr7:43289797-43291726	149.364	-1.11292	0.294354	-3.78091	0.000156257	0.00815173	196.15	212.759	78.0798	110.468
chr26:11089101-11094724	322.967	0.762238	0.201738	3.77836	0.000157863	0.00822049	258.854	221.033	433.866	378.117
chr23:25669712-25671175	77.189	1.57288	0.416322	3.77804	0.000158068	0.00822054	32.1558	44.9158	128.791	102.893
chr25:9913665-9916011	353.293	0.794012	0.210197	3.77746	0.000158435	0.00822906	302.264	216.305	486.188	408.416
chr20:23108497-23109722	130.226	1.2107	0.320753	3.77457	0.000160286	0.00831445	62.7037	93.3776	189.967	174.855
chr29:44690065-44693480	243.684	-0.82321	0.218228	-3.77226	0.000161777	0.00838107	321.558	301.409	176.283	175.486
chr10:48034183-48037079	284.109	0.801548	0.21267	3.76898	0.000163918	0.00848106	229.914	185.573	363.031	357.917
chr22:10578532-10580136	271.481	0.809774	0.214871	3.76865	0.000164131	0.00848121	188.111	205.667	367.056	325.092
chr27:29274516-29282103	2042.47	0.3431	0.0910653	3.76762	0.00016481	0.0085054	1689.79	1907.74	2347.22	2225.14
chr4:118627241-118643381	1964.72	0.366993	0.0974203	3.76711	0.000165148	0.00851197	1647.98	1783.63	2055.03	2372.22
chr11:92588035-92590408	322.197	0.786445	0.208875	3.76514	0.000166457	0.0085685	205.797	265.949	378.325	438.716
chr2:9776841-9779164	414.897	0.645013	0.171497	3.76109	0.000169178	0.00869745	318.342	328.595	518.386	494.266
chr13:72706138-72708858	384.679	0.731208	0.194442	3.76055	0.00016954	0.00870502	323.165	256.493	521.605	437.454
chr23:17297453-17298871	97.9848	-1.32089	0.351588	-3.75692	0.000172016	0.00882088	123.8	156.023	51.5166	60.5996
chr13:78310361-78311644	138.053	1.24873	0.332473	3.75587	0.00017274	0.00884677	104.506	60.2817	215.726	171.699
chr26:19092279-19092797	71.0556	1.64419	0.437976	3.75405	0.000173998	0.0088999	32.1558	36.6418	88.5441	126.881
chr27:14432783-14434027	142.428	1.26187	0.336951	3.74498	0.000180411	0.00921628	77.1738	89.8316	254.363	148.343
chr15:15359126-15364010	393.445	0.68376	0.182598	3.74461	0.000180675	0.00921808	329.597	275.405	502.287	466.491
chr3:33437844-33445486	887.391	0.520133	0.139224	3.73595	0.000187008	0.00952914	805.502	656.007	961.911	1126.14
chr19:12707330-12709850	247.068	0.842826	0.225642	3.73524	0.000187535	0.00953762	191.327	163.115	330.833	302.998
chrUn_NW_020190345v1:1193-1528	181.506	-1.15673	0.309691	-3.73509	0.000187647	0.00953762	276.54	225.761	77.2749	146.449
chr15:32285726-32287763	235.994	0.859525	0.230165	3.73438	0.000188175	0.00954044	175.249	160.751	284.146	323.829
chr5:42191987-42197157	891.029	0.461134	0.12348	3.73448	0.000188102	0.00954044	707.427	790.754	1008.6	1057.34
chr27:7231793-7234137	212.3	0.908847	0.243399	3.73399	0.000188472	0.00954348	155.955	139.475	296.22	257.548
chr25:10681022-10683614	338.299	0.720099	0.192975	3.73157	0.000190292	0.00962358	234.737	275.405	416.962	426.091
chr4:119580193-119585192	987.147	0.442244	0.118598	3.72894	0.000192287	0.00971216	807.11	865.22	1190.52	1085.74
chr7:43250811-43252210	246.798	-0.854512	0.229176	-3.72863	0.000192525	0.00971216	337.635	297.863	196.407	155.287
chr19:53876238-53877394	131.657	1.15739	0.310564	3.72675	0.000193967	0.00977269	78.7816	83.9216	200.432	163.493
chr18:24888280-24890273	242.622	0.834525	0.224024	3.72516	0.000195192	0.00982216	168.818	179.663	299.44	322.567
chr20:25779241-25780970	147.326	1.14188	0.306566	3.72476	0.000195501	0.00982542	78.7816	104.016	231.02	175.486
chr19:61977585-61979945	377.018	0.695944	0.186898	3.72365	0.000196363	0.00985651	270.108	304.955	433.061	499.947
chr25:41404239-41405340	86.6405	-1.41519	0.380251	-3.72173	0.000197864	0.0099195	149.524	102.834	47.4919	46.7122
chr10:78568774-78570464	131.723	1.12786	0.303432	3.71701	0.000201593	0.0100939	85.2128	80.3756	179.503	181.799
chr3:48477242-48478538	228.708	0.864722	0.232933	3.71232	0.00020537	0.0102703	167.21	157.205	313.929	276.486
chr29:50533753-50537456	372.061	-0.715878	0.193022	-3.70878	0.000208256	0.0104017	503.238	421.972	309.904	253.13
chr6:15782949-15783978	106.717	1.32093	0.356234	3.70803	0.000208874	0.0104197	53.057	68.5557	130.401	174.855
chr2:88400890-88402816	234.272	0.864702	0.233336	3.70582	0.000210708	0.0104982	163.994	167.843	330.028	275.223
chr29:41202235-41203715	116.643	1.25407	0.33844	3.70545	0.000211019	0.0105007	70.7427	67.3737	138.451	190.005
chr19:21235018-21239989	803.478	0.478656	0.129244	3.70351	0.000212637	0.0105682	644.723	697.377	895.906	975.907
chr13:81192891-81194260	110.7	1.37344	0.370993	3.70206	0.000213853	0.0106025	81.9972	42.5518	173.064	145.187
chr5:56089241-56091302	365.789	0.692565	0.187062	3.70234	0.000213623	0.0106025	270.108	288.407	482.968	421.673
chr14:30906671-30907825	315.359	0.772092	0.208601	3.70129	0.000214509	0.010609	199.366	264.767	409.718	387.585
chr8:100901517-100910952	820.448	0.458267	0.123812	3.70131	0.000214491	0.010609	684.918	697.377	939.373	960.126
chr5:111943862-111948490	1244.91	0.397721	0.107495	3.69989	0.000215692	0.0106544	1014.51	1132.35	1385.31	1447.45
chr26:18648158-18660134	1404.93	-0.356387	0.096444	-3.69527	0.000219653	0.0108368	1577.24	1577.96	1229.15	1235.35
chr5:104036235-104039538	313.266	0.793466	0.214822	3.69359	0.00022111	0.0108954	260.462	199.757	359.811	433.035
chr28:19318891-19320928	290.266	-0.758475	0.205372	-3.69318	0.000221464	0.0108996	385.869	343.96	228.605	202.63
chr3:23680751-23682268	492.07	-0.605564	0.16403	-3.69178	0.000222692	0.0109466	561.118	625.275	420.182	361.704
chr5:113682515-113684059	266.911	0.808101	0.219026	3.68952	0.000224676	0.0110307	215.444	173.753	344.517	333.929
chr4:66455964-66457618	165.16	1.04897	0.284552	3.6864	0.000227448	0.0111532	125.407	91.0136	206.871	237.349
chr10:35076812-35077862	73.2406	1.54991	0.420571	3.68526	0.000228471	0.0111898	41.8025	33.0959	118.327	99.7369
chr13:56597676-56599189	140.543	1.16527	0.316274	3.68435	0.000229284	0.011216	75.566	96.9236	226.19	163.493
chr6:113419466-113422386	488.635	0.596731	0.162021	3.68304	0.000230468	0.0112603	366.576	410.152	610.955	566.859
chr14:45951098-45952352	197.508	0.97922	0.266299	3.67714	0.000235862	0.0115099	146.309	120.563	224.58	298.579
chr15:17839981-17848178	1110.46	0.399403	0.108697	3.67446	0.000238352	0.0116173	974.319	942.05	1239.62	1285.85
chr14:30121105-30121998	104.595	1.25966	0.342986	3.67261	0.000240082	0.0116735	64.3115	59.0997	152.94	142.03
chr18:12972729-12978483	718.336	0.499958	0.136121	3.67289	0.000239825	0.0116735	635.076	556.72	850.829	830.72
chr1:10860264-10861901	195.685	0.98191	0.267561	3.66985	0.000242695	0.0117863	147.916	115.835	293.001	225.986
chr8:107077113-107078658	143.505	1.0765	0.293513	3.66765	0.000244787	0.0118737	90.0361	94.5596	181.113	208.311
chr3:15985617-15988142	179.406	0.985728	0.268876	3.66611	0.00024627	0.0119313	114.153	126.473	212.506	264.492
chr7:19679366-19682342	210.097	-1.0061	0.274641	-3.66333	0.00024896	0.0120327	271.716	288.407	175.478	104.787
chr7:43275026-43276409	266.631	-0.768007	0.209634	-3.66356	0.000248739	0.0120327	336.028	335.686	206.066	188.743
chr14:66173452-66189440	4560.87	0.254319	0.0694691	3.6609	0.000251334	0.0121329	3929.43	4385.2	4955.25	4973.59
chr1:89827787-89828747	87.9298	1.37304	0.375209	3.65939	0.000252814	0.0121898	48.2336	49.6438	132.011	121.831
chr10:35219158-35219790	111.79	1.42298	0.389113	3.65699	0.00025519	0.0122896	43.4103	76.8297	204.456	122.462
chr16:71077549-71079655	233.237	0.849773	0.232485	3.65516	0.000257017	0.0123628	151.132	180.845	313.124	287.848
chr10:21954515-21956690	635.073	0.524959	0.143838	3.64965	0.000262597	0.0126162	485.552	554.356	763.089	737.296
chr29:39919566-39923640	744.865	0.490292	0.134471	3.64608	0.000266273	0.0127624	664.016	576.813	872.562	866.07
chrUn_NW_020190716v1:11936-12351	188.081	-1.04103	0.285516	-3.64615	0.0002662	0.0127624	263.677	243.491	91.7639	153.393
chr14:19269371-19271740	504.689	0.569009	0.156103	3.64508	0.000267304	0.0127824	393.908	418.426	597.27	609.153
chr7:80344814-80347774	401.873	-0.692297	0.189927	-3.64507	0.000267324	0.0127824	440.534	551.992	278.512	336.454
chr4:94716982-94718756	457.177	0.691275	0.189792	3.64228	0.000270235	0.0129064	302.264	394.786	631.078	500.578
chr23:6887279-6890862	727.005	0.561215	0.154163	3.64041	0.000272209	0.0129853	615.783	559.083	978.815	754.339
chr19:53873399-53875456	253.137	0.836645	0.229853	3.63991	0.000272736	0.0129951	157.563	204.485	343.712	306.786
chr11:92635206-92640408	929.244	0.430148	0.11825	3.63761	0.000275184	0.0130962	819.972	764.751	1058.5	1073.75
chr5:87595641-87610606	2531.9	0.281966	0.0775522	3.63582	0.000277094	0.0131716	2281.45	2288.34	2839.05	2718.78
chr15:53399812-53418378	3441.39	-0.287096	0.0789749	-3.63528	0.000277682	0.013184	3538.74	4023.51	3016.14	3187.16
chr15:56275174-56275897	66.3218	-1.55068	0.42662	-3.63482	0.000278179	0.0131921	85.2128	112.289	36.2226	31.5623
chr11:63733865-63734967	98.1706	1.29185	0.355444	3.63447	0.000278548	0.0131941	54.6648	59.0997	131.206	147.712
chr8:102038197-102039669	307.556	0.728314	0.200431	3.63373	0.000279351	0.0132166	247.599	216.305	383.155	383.166
chr18:36559474-36569858	922.101	0.432087	0.118978	3.63166	0.000281603	0.013292	762.091	807.302	1035.16	1083.85
chr19:39448056-39449936	282.382	0.766123	0.210952	3.63174	0.000281519	0.013292	192.935	224.579	342.102	369.91
chr5:60657025-60666181	1302.37	0.368915	0.101599	3.63108	0.000282241	0.0133065	1104.55	1167.81	1459.37	1477.75
chr23:28527251-28528631	181.172	0.935246	0.257687	3.62939	0.000284087	0.013378	122.192	126.473	243.094	232.93
chr13:77898295-77900980	463.001	0.605508	0.166938	3.62714	0.00028658	0.0134796	382.654	352.234	590.026	527.091
chr7:6906156-6908612	433.994	-0.65581	0.180825	-3.62677	0.000286988	0.0134831	472.69	588.633	312.319	362.335
chr29:29405902-29407617	219.632	0.854134	0.235844	3.6216	0.000292784	0.0137394	165.602	147.749	290.586	274.592
chr5:111609065-111609807	83.2368	1.43507	0.396481	3.61951	0.00029516	0.0138348	51.4492	39.0058	108.668	133.824
chr18:11669892-11674000	197.783	0.951601	0.262954	3.61888	0.000295881	0.0138525	112.545	156.023	242.289	280.273
chr26:30876915-30892590	2045.26	0.313011	0.0865498	3.61654	0.000298567	0.0139621	1742.84	1903.01	2262.71	2272.49
chr1:58810075-58810876	69.6877	1.61102	0.445739	3.61426	0.000301212	0.0140473	43.4103	26.0039	115.912	93.4245
chr2:128923256-128931988	2559.21	0.314875	0.0871155	3.61446	0.000300977	0.0140473	2106.2	2451.46	2807.65	2871.54
chr8:72429033-72430413	100.028	1.27321	0.352294	3.61407	0.000301433	0.0140473	64.3115	53.1898	142.476	140.137
chr10:80020197-80022377	241.801	0.85117	0.23557	3.61323	0.000302405	0.0140478	183.288	161.933	346.127	275.855
chr14:9184368-9185618	83.4533	1.40707	0.38943	3.61316	0.00030249	0.0140478	40.1947	50.8258	115.912	126.881
chr26:8980835-8983535	508.596	0.571602	0.158181	3.61361	0.000301968	0.0140478	416.417	401.878	639.128	576.959
chr12:20351362-20352577	104.648	1.39487	0.386117	3.61256	0.000303186	0.014064	73.9582	42.5518	121.547	180.536
chr11:9806882-9811220	704.207	-0.474673	0.131518	-3.6092	0.000307147	0.0142314	824.795	813.212	598.075	580.747
chrX:112638578-112640746	191.499	0.965342	0.267728	3.60568	0.00031134	0.0144091	154.348	106.38	261.608	243.661
chr1:69133108-69136037	158.657	1.05108	0.291685	3.60346	0.000314007	0.0145159	83.605	121.745	225.385	203.893
chr12:55346865-55349909	345.028	0.684095	0.189895	3.60249	0.000315184	0.0145412	245.992	282.497	427.427	424.198
chr3:20747806-20758237	3942.57	-0.239059	0.0663609	-3.60241	0.000315275	0.0145412	4358.71	4179.53	3661.7	3570.33
chr25:9976205-9976917	99.5311	1.26947	0.35263	3.60001	0.000318203	0.0146595	62.7037	54.3718	135.231	145.818
chr6:31723558-31724781	81.3531	-1.41895	0.394275	-3.59889	0.00031958	0.0147061	98.0751	138.293	49.9067	39.1373
chr1:79189080-79191145	128.753	1.11007	0.3088	3.59479	0.000324658	0.0149058	85.2128	78.0117	185.138	166.649
chr7:51538474-51540411	164.224	-1.00897	0.280672	-3.59485	0.000324577	0.0149058	252.423	186.755	116.717	100.999
chr18:19130081-19138202	958.012	0.43584	0.121279	3.59371	0.000325998	0.0149503	778.169	848.672	1156.71	1048.5
chr4:102691772-102695047	197.996	0.95177	0.265091	3.59035	0.000330238	0.0151276	107.722	160.751	258.388	265.123
chr4:106676353-106681124	904.66	0.49525	0.137997	3.58885	0.000332137	0.0151973	649.546	848.672	1082.65	1037.77
chr10:35220144-35221391	173.688	0.958275	0.267263	3.58551	0.000336419	0.0153758	107.722	127.655	239.069	220.305
chr2:79507468-79512041	278.391	0.817739	0.228197	3.58348	0.000339042	0.0154782	167.21	234.035	381.545	330.773
chr16:63894144-63945615	7113.27	0.221913	0.0619656	3.58123	0.000341983	0.0155948	6230.18	6898.12	7684.83	7639.97
chr1:46188792-46204394	2236.14	0.306078	0.0854767	3.58083	0.000342499	0.0156007	1910.05	2087.4	2407.6	2539.5
chr3:102048106-102049435	145.705	1.04449	0.291817	3.57926	0.00034457	0.0156774	99.6828	91.0136	181.918	210.205
chr3:9759613-9767067	1224.7	-0.367185	0.102638	-3.57746	0.000346948	0.0157678	1397.17	1362.84	1062.53	1076.27
chr11:85534575-85536796	159.388	1.07572	0.30099	3.57392	0.000351673	0.0159343	128.623	78.0117	212.506	218.411
chr12:85408110-85413674	3029.08	0.256263	0.0717048	3.57386	0.000351759	0.0159343	2791.12	2731.59	3274.52	3319.09
chr29:26345581-26349019	250.986	0.843899	0.236133	3.57383	0.000351798	0.0159343	184.896	174.935	276.097	368.017
chr6:113270519-113273985	658.279	0.547965	0.153531	3.5691	0.000358216	0.0162069	601.313	470.434	814.606	746.764
chr9:54377425-54379892	162.471	1.0739	0.301161	3.56586	0.000362661	0.0163896	120.584	89.8316	181.918	257.548
chr7:50853776-50858066	441.042	-0.584366	0.163891	-3.56557	0.000363071	0.0163898	538.609	520.078	346.932	358.548
chr19:17773210-17804864	6763.97	0.20262	0.0568524	3.56397	0.000365284	0.0164712	6135.32	6440.69	7253.37	7226.51
chr16:36397178-36397903	102.861	1.31091	0.368175	3.56056	0.000370064	0.0166682	75.566	43.7338	145.695	146.449
chr17:12818865-12823745	391.18	0.73094	0.205389	3.55881	0.00037254	0.0167526	352.106	238.763	455.6	518.253
chr3:31635785-31636792	78.3	1.57745	0.443271	3.55865	0.000372768	0.0167526	25.7246	52.0078	96.5936	138.874
chr22:59778730-59779836	126.998	1.12919	0.317449	3.55708	0.000374996	0.0168152	91.6439	68.5557	166.624	181.168
chr7:43257836-43260282	366.802	-0.643341	0.180851	-3.55731	0.000374679	0.0168152	443.749	450.34	301.05	272.067
chr5:26996940-26998300	119.225	1.18871	0.334821	3.55027	0.000384833	0.0172372	83.605	62.6457	145.695	184.955
chr18:25210617-25213993	542.598	0.542179	0.152766	3.54908	0.000386574	0.0172768	451.788	432.61	614.979	671.015
chr19:28287519-28289984	233.391	0.827517	0.233156	3.5492	0.000386409	0.0172768	155.955	179.663	319.564	278.38
chr23:27871124-27872811	290.33	0.723953	0.204042	3.54806	0.000388081	0.017325	215.444	222.215	372.69	350.973
chr11:67405741-67406345	74.0789	1.4571	0.410948	3.54571	0.00039156	0.017461	40.1947	39.0058	102.228	114.887
chr15:27922759-27924996	218.416	0.856834	0.241731	3.54457	0.000393248	0.0175169	139.878	170.207	265.632	297.948
chr4:103508206-103509639	76.6908	1.5396	0.434429	3.54397	0.000394154	0.0175379	49.8414	29.5499	94.1788	133.193
chr11:98643221-98644394	151.688	-0.972865	0.27457	-3.54323	0.000395263	0.0175485	200.973	200.939	103.838	100.999
chr6:101737480-101742714	1123.35	0.436456	0.123174	3.54342	0.000394973	0.0175485	853.735	1051.98	1346.68	1241.03
chr15:81351967-81353388	173.368	0.95713	0.270198	3.54233	0.000396606	0.0175888	106.114	128.837	243.899	214.624
chr7:21114501-21118445	772.398	0.453283	0.127984	3.54172	0.000397524	0.0176102	631.861	671.373	891.881	894.476
chr16:32203402-32204456	119.545	1.1532	0.325667	3.54104	0.000398549	0.0176362	85.2128	63.8277	165.014	164.124
chr1:49938167-49945474	482.419	0.610761	0.172536	3.5399	0.00040028	0.0176926	432.495	333.323	575.537	588.322
chr25:18685612-18686464	80.1547	1.55334	0.438843	3.53962	0.000400699	0.0176926	57.8804	24.8219	116.717	121.199
chr14:38693945-38698539	707.487	0.529751	0.149699	3.53877	0.000402	0.0177081	508.061	647.733	796.092	878.064
chr16:45164004-45166174	303.01	0.758204	0.214271	3.53853	0.000402367	0.0177081	189.719	258.857	390.399	373.067
chr19:27014479-27025902	3748.5	-0.281025	0.0794089	-3.53896	0.000401707	0.0177081	3985.71	4235.09	3618.24	3154.97
chr15:29321037-29322356	125.635	-1.11439	0.315172	-3.53581	0.000406526	0.0178716	162.387	180.845	91.7639	67.5434
chr3:34549945-34551969	320.5	0.684937	0.193766	3.53487	0.000407977	0.0178964	239.56	251.765	393.619	397.054
chr3:120446183-120454228	1160.6	-0.396935	0.112289	-3.53495	0.000407845	0.0178964	1283.01	1355.75	939.373	1064.28
chr5:103918652-103919687	140.044	1.07676	0.304667	3.53421	0.000408991	0.0179215	96.4673	83.9216	212.506	167.28
chr8:23316918-23317667	89.1044	1.36318	0.385798	3.5334	0.00041025	0.0179571	57.8804	42.5518	112.693	143.293
chr25:9445095-9446279	158.233	0.979659	0.277404	3.53153	0.000413163	0.0180613	114.153	99.2876	209.286	210.205
chr27:16767733-16770869	392.494	0.680809	0.192793	3.5313	0.000413526	0.0180613	276.54	325.049	538.509	429.879
chr5:106822822-106824181	135.846	1.10932	0.314194	3.53069	0.000414474	0.0180831	77.1738	94.5596	160.184	211.468
chr16:70776103-70778068	133.18	1.07676	0.305551	3.52399	0.0004251	0.0185267	78.7816	92.1956	169.844	191.899
chr15:56140085-56141532	217.917	0.840743	0.238603	3.52361	0.000425711	0.0185334	162.387	150.113	297.83	261.336
chr18:19138549-19141236	162.519	0.963168	0.273534	3.5212	0.000429603	0.0186625	109.33	111.108	203.652	225.986
chr21:14200075-14201276	108.203	1.21609	0.34536	3.52123	0.000429545	0.0186625	56.2726	73.2837	165.014	138.243
chr15:33668713-33689063	11682.1	0.193587	0.0549899	3.52041	0.000430874	0.0186976	10428.1	11364.9	12365.6	12570
chr17:45171031-45174418	725.844	-0.46137	0.13112	-3.51867	0.00043371	0.0188004	808.717	872.312	612.564	609.784
chr13:61304767-61310436	397.796	-0.662779	0.18856	-3.51495	0.00043984	0.0190457	419.633	554.356	303.465	313.729
chr27:37976447-37977926	170.182	1.03225	0.293833	3.51306	0.000442984	0.0191613	99.6828	122.927	271.267	186.849
chr7:43292064-43293035	74.7981	-1.42994	0.407136	-3.5122	0.000444408	0.0192023	94.8595	122.927	46.6869	34.7185
chr28:13769676-13770776	130.833	1.08092	0.307914	3.51046	0.000447336	0.0193082	80.3894	87.4676	164.209	191.268
chr10:7754848-7756376	161.706	0.957148	0.272885	3.50751	0.000452321	0.0195025	112.545	107.562	207.676	219.042
chr6:36332516-36334098	66.4091	1.54434	0.440688	3.50438	0.000457676	0.0197123	32.1558	35.4598	110.278	87.7432
chr13:73702456-73709704	1533.93	0.359509	0.1026	3.50398	0.000458351	0.0197203	1239.6	1444.4	1746.73	1705
chr12:19826956-19827794	86.3295	-1.29637	0.370032	-3.50341	0.000459344	0.019742	109.33	135.929	48.2968	51.7622
chr13:67023332-67025016	475.644	0.629687	0.1798	3.50215	0.000461513	0.0198141	414.809	333.323	634.298	520.147
chr18:2334628-2335856	116.844	1.18005	0.337194	3.49962	0.000465929	0.0199824	59.4882	82.7396	178.698	146.449
chr27:15530210-15532298	168.597	0.948349	0.271242	3.49632	0.000471731	0.0202098	114.153	115.835	239.874	204.524
chr1:67037663-67038764	66.5309	1.53172	0.438792	3.49076	0.000481645	0.0206014	28.9402	39.0058	102.228	95.9494
chr20:40315478-40319056	417.365	0.629816	0.180431	3.49063	0.000481891	0.0206014	364.968	291.953	520.8	491.741
chrX:15787091-15787885	105.292	1.18953	0.34099	3.48845	0.000485829	0.0207477	59.4882	68.5557	147.305	145.818
chr28:13797907-13823493	5820.87	0.203835	0.0584565	3.48695	0.000488569	0.0208427	5376.44	5444.27	6128.86	6333.93
chr2:121217746-121219455	147.642	1.06405	0.305377	3.48439	0.000493263	0.0210207	73.9582	115.835	204.456	196.318
chr5:73635330-73654116	2398.05	-0.330013	0.0947497	-3.48299	0.000495844	0.0211084	2561.21	2781.23	1946.36	2303.42
chr10:46849030-46850940	141.773	1.03175	0.29626	3.48258	0.000496601	0.0211184	102.898	83.9216	197.212	183.061
chr10:7852093-7855115	488.148	0.632251	0.181617	3.48123	0.000499114	0.0212029	315.126	447.976	594.856	594.634
chr29:18038992-18042429	330.597	0.672396	0.193308	3.47837	0.000504469	0.0213853	245.992	263.585	387.984	424.829
chr3:794575-795422	105.715	1.26023	0.362291	3.47851	0.000504217	0.0213853	46.6258	76.8297	161.794	137.612
chr8:23236796-23239092	579.512	0.505212	0.145257	3.47807	0.000505047	0.0213874	480.729	477.526	676.155	683.64
chr12:85260583-85263837	1536.5	0.339774	0.0978126	3.47373	0.000513286	0.0217135	1286.23	1424.3	1697.63	1737.82
chr19:10746503-10750358	806.826	0.469012	0.135029	3.47342	0.000513871	0.0217155	620.606	730.473	983.645	892.582
chr20:59123143-59124937	418.125	0.68263	0.19659	3.47235	0.00051593	0.0217402	258.854	380.602	528.045	504.997
chr24:567727-572678	576.146	0.508639	0.146475	3.47252	0.000515589	0.0217402	475.905	475.162	693.864	659.652
chrX:87227448-87230114	328.213	0.712491	0.205194	3.47227	0.000516071	0.0217402	258.854	238.763	454.795	360.442
chr3:9769365-9778575	1600.47	-0.333729	0.0961792	-3.46987	0.00052071	0.0219127	1704.26	1862.82	1456.15	1378.64
chr16:80916835-80918504	306.771	-0.684583	0.197513	-3.46601	0.000528236	0.0222063	355.321	400.696	231.825	239.242
chr11:98631933-98633988	260.418	-0.906709	0.261725	-3.46436	0.000531496	0.0223066	274.932	404.242	144.085	218.411
chr4:46190971-46195932	465.211	0.593837	0.171419	3.46424	0.000531729	0.0223066	344.067	395.968	601.295	519.516
chr21:21009768-21015301	870.316	0.446925	0.129031	3.4637	0.000532808	0.0223073	670.448	800.21	1003.77	1006.84
chr7:17775067-17776255	114.622	1.12929	0.326039	3.46367	0.000532851	0.0223073	75.566	68.5557	152.135	162.23
chrUn_NW_020190452v1:8994-9257	176.214	-1.10335	0.31905	-3.45824	0.000543719	0.0227387	271.716	210.395	75.665	147.08
chr7:15162046-15164400	207.617	-0.87792	0.254022	-3.45608	0.000548086	0.0228976	228.306	308.501	158.574	135.087
chr11:93140052-93142823	498.454	0.558387	0.161669	3.45389	0.000552557	0.0230606	374.615	430.246	615.784	573.172
chr10:82141337-82142523	119.605	-1.06981	0.310289	-3.44778	0.000565223	0.0235648	160.779	163.115	81.2996	73.2246
chr11:78906434-78908166	254.587	0.769664	0.223355	3.44592	0.000569112	0.0237024	191.327	185.573	293.001	348.448
chr3:86117098-86117800	69.7417	1.60183	0.464937	3.44526	0.000570517	0.0237365	20.9012	47.2798	93.3738	117.412
chr12:75881359-75882794	81.1523	1.59016	0.461797	3.44341	0.000574427	0.0238745	19.2935	60.2817	117.522	127.512
chr19:51615792-51617545	372.514	-0.654815	0.190217	-3.44247	0.000576431	0.0239332	504.845	407.788	271.267	306.154
chr13:67599723-67600483	107.437	1.16224	0.33765	3.44216	0.000577093	0.023936	69.1349	63.8277	140.866	155.918
chr19:21247935-21248908	77.8256	1.46011	0.424436	3.44012	0.00058146	0.0240924	28.9402	53.1898	105.448	123.724
chr14:7012880-7021792	1437.8	0.362288	0.105372	3.43819	0.000585607	0.0242393	1221.92	1294.28	1511.69	1723.3
chr7:49859349-49869493	1227.5	-0.358387	0.10425	-3.43778	0.000586512	0.0242519	1360.19	1398.3	1042.41	1109.1
chr9:29602673-29604213	270.904	0.727439	0.211833	3.43402	0.00059471	0.0245657	196.15	211.577	326.808	349.079
chr5:97123965-97128555	1134.82	0.370297	0.10787	3.43279	0.000597402	0.0246517	1011.3	969.236	1303.21	1255.55
chr1:72956590-72957873	141.042	1.13048	0.329418	3.43176	0.000599668	0.0246947	64.3115	111.108	218.945	169.805
chr3:76767285-76773712	1121.78	0.380453	0.110859	3.43186	0.000599453	0.0246947	987.182	963.326	1212.25	1324.35
chr19:28260820-28261956	98.4508	1.2764	0.372052	3.43069	0.000602048	0.0247674	72.3505	43.7338	134.426	143.293
chr24:58717630-58719515	125.424	1.16425	0.339444	3.42989	0.000603835	0.0248157	93.2517	62.6457	145.695	200.105
chr19:14814818-14819681	338.495	0.647051	0.188734	3.42838	0.000607204	0.0249287	260.462	267.131	404.083	422.304
chr19:39343184-39344858	335.069	-0.641662	0.187193	-3.42781	0.000608463	0.024955	400.339	416.062	268.852	255.023
chr13:17549432-17550984	132.957	1.09904	0.320656	3.42748	0.000609202	0.02496	102.898	67.3737	192.382	169.174
chr5:35020801-35021828	94.435	1.233	0.359869	3.42624	0.000612003	0.0250493	54.6648	57.9177	137.646	127.512
chr2:61887503-61888897	134.529	-1.03638	0.302636	-3.42451	0.00061592	0.0251841	170.426	191.483	76.4699	99.7369
chr4:103240351-103241872	175.001	0.952853	0.278413	3.42245	0.000620594	0.0253495	96.4673	140.657	240.679	222.199
chr21:41189182-41196962	1361.56	0.340012	0.0993714	3.42163	0.000622465	0.0254002	1178.51	1224.55	1500.42	1542.77
chr5:112530104-112531809	227.392	-0.876155	0.256262	-3.41898	0.000628556	0.0256229	326.381	263.585	129.596	190.005
chr4:111724325-111725892	137.503	1.09827	0.321402	3.41712	0.000632885	0.0257473	102.898	73.2837	158.574	215.255
chr9:95423070-95424485	205.482	0.842725	0.246604	3.41732	0.000632399	0.0257473	135.054	158.387	278.512	249.974
chr29:44003624-44005789	215.651	-0.850985	0.249142	-3.41567	0.00063625	0.0258582	286.186	268.313	178.698	129.405
chr5:104073043-104078387	951.288	0.398221	0.11663	3.41438	0.000639264	0.0259545	837.657	804.938	1058.5	1104.05
chr10:35047093-35050138	411.041	0.630242	0.184656	3.41306	0.000642367	0.0259771	356.929	289.589	533.68	463.966
chr19:55184064-55186832	479.37	-0.539437	0.158028	-3.41354	0.000641236	0.0259771	557.902	577.995	380.74	400.841
chr19:58532243-58534910	253.209	-0.754166	0.220965	-3.41305	0.000642395	0.0259771	350.498	286.043	187.553	188.743
chrX:4225710-4226762	94.8216	1.22925	0.360154	3.41312	0.000642236	0.0259771	57.8804	55.5538	140.866	124.987
chr3:87263253-87270312	2770.86	0.328016	0.096124	3.41243	0.000643863	0.0260104	2184.98	2723.32	3172.29	3002.84
chr19:7871241-7872713	99.2695	1.22259	0.358513	3.41017	0.00064923	0.026201	62.7037	56.7357	122.352	155.287
chr14:30997281-30998077	114.043	1.26092	0.369857	3.40922	0.000651497	0.0262138	65.9193	68.5557	115.912	205.786
chr5:27684411-27685286	94.4514	1.26261	0.370326	3.40946	0.000650915	0.0262138	46.6258	63.8277	144.89	122.462
chr5:51242293-51243521	130.658	1.18493	0.347525	3.40963	0.000650504	0.0262138	53.057	105.198	167.429	196.949
chr2:129177528-129179150	127.998	1.08321	0.317837	3.40806	0.000654263	0.0262989	67.5271	95.7416	173.868	174.855
chr13:54937127-54945859	1182.34	-0.379376	0.111347	-3.40714	0.00065647	0.0263614	1387.52	1288.37	968.351	1085.11
chr5:116267185-116268177	113.896	-1.07844	0.316912	-3.40296	0.000666595	0.0267413	159.171	150.113	72.4452	73.8558
chr10:47155206-47156261	146.02	-0.972699	0.285907	-3.40215	0.000668576	0.0267676	212.228	174.935	102.228	94.6869
chr14:63952131-63953443	285.81	0.697772	0.205089	3.40228	0.000668251	0.0267676	223.483	212.759	359.811	347.185
chr11:106572074-106572988	107.213	-1.20492	0.3542	-3.40182	0.000669379	0.0267732	184.896	114.653	66.8106	62.4934
chr9:66611838-66614030	145.96	0.975244	0.286716	3.40143	0.000670336	0.0267849	101.291	95.7416	192.382	194.424
chr5:55951102-55964577	5640.95	-0.202382	0.0595167	-3.40043	0.000672792	0.0268564	6172.3	5901.7	5287.69	5202.1
chr11:95800598-95801674	135.965	-1.00507	0.295648	-3.39956	0.000674946	0.0269158	163.994	198.575	94.1788	87.112
chr16:29311230-29312397	69.5369	-1.38073	0.406231	-3.39888	0.000676636	0.0269565	102.898	98.1056	38.6374	38.506
chr25:14357049-14358853	599.821	-0.480575	0.141425	-3.39809	0.000678586	0.0270076	702.603	695.013	505.506	496.16
chr6:57005303-57007482	338.161	0.650891	0.191653	3.39619	0.000683319	0.0271692	263.677	262.403	437.086	389.479
chr2:120341243-120342650	133.479	1.03635	0.305236	3.39524	0.000685676	0.0272361	78.7816	95.7416	170.649	188.743
chr6:88193524-88195397	265.451	0.730838	0.215304	3.39445	0.000687671	0.0272884	188.111	210.395	344.517	318.779
chr27:44585129-44586826	171.691	0.94861	0.279583	3.39295	0.000691444	0.0273989	94.8595	138.293	226.995	226.617
chr5:27051743-27052821	103.517	1.19734	0.352904	3.3928	0.000691813	0.0273989	53.057	72.1017	133.621	155.287
chr3:16296546-16303819	2083.02	0.283937	0.0837234	3.39137	0.00069545	0.027516	1929.35	1829.73	2291.68	2281.32
chr28:26417706-26424375	490.422	0.643221	0.189734	3.39013	0.000698601	0.0276136	442.142	326.231	524.825	668.49
chr3:116531432-116532114	96.198	1.21921	0.359854	3.38806	0.000703884	0.0277951	62.7037	53.1898	143.281	125.618
chr14:81715677-81717610	300.018	-0.692045	0.204297	-3.38744	0.000705489	0.0278313	387.477	354.598	209.286	248.711
chr3:48592676-48596090	282.021	0.709896	0.209714	3.38507	0.000711599	0.0280449	213.836	213.941	372.69	327.617
chr5:54720956-54722395	216.511	0.811754	0.239928	3.38333	0.000716132	0.028196	172.033	143.021	283.341	267.648
chr11:92930180-92932414	381.034	0.6039	0.17871	3.37922	0.000726918	0.0285928	297.441	307.319	445.94	473.435
chr10:43426090-43427452	225.021	0.95071	0.281474	3.37761	0.000731184	0.0287326	107.722	197.393	264.827	330.142
chr5:30568335-30577381	2518.25	0.259186	0.076792	3.37516	0.000737716	0.0289611	2321.65	2264.7	2734.4	2752.23
chr1:142153586-142154373	124.859	1.10508	0.327609	3.37318	0.000743053	0.0291423	64.3115	93.3776	156.16	185.586
chr7:49112158-49114592	335.935	0.639492	0.189607	3.37273	0.000744272	0.0291617	271.716	254.129	405.693	412.204
chr5:116276386-116278008	361.742	-0.60574	0.179783	-3.36929	0.000753613	0.0294991	430.887	442.066	290.586	283.43
chr3:3227226-3229092	118.312	1.07744	0.319955	3.36748	0.000758593	0.0296653	73.9582	78.0117	166.624	154.655
chr13:78715753-78718426	652.878	-0.477448	0.141919	-3.36423	0.000767574	0.0299874	712.25	806.12	566.682	526.459
chr9:34961563-34962803	144.898	0.967035	0.287511	3.36347	0.00076968	0.0300406	98.0751	98.1056	188.358	195.055
chr10:76081601-76083091	106.31	1.21372	0.360915	3.3629	0.000771294	0.0300617	46.6258	80.3756	150.525	147.712
chr13:77361734-77367658	387.554	0.613505	0.182456	3.36248	0.000772456	0.0300617	332.812	281.315	453.185	482.903
chr29:10853990-10855836	225.469	-0.778793	0.231605	-3.36259	0.000772152	0.0300617	270.108	299.045	178.698	154.024
chr16:71082063-71085058	415.421	0.617345	0.183629	3.36191	0.000774044	0.0300712	287.794	366.418	479.748	527.722
chr23:28571720-28572179	173.955	1.06286	0.316154	3.36186	0.00077419	0.0300712	147.916	79.1936	200.432	268.28
chr18:49208239-49210946	254.599	0.736737	0.219194	3.36111	0.000776291	0.0301238	197.758	184.391	333.248	302.998
chr1:67052548-67055839	137.478	1.01199	0.301294	3.35883	0.000782742	0.0302964	101.291	81.5576	191.577	175.486
chr20:4840872-4843247	366.129	0.625278	0.186155	3.35891	0.000782513	0.0302964	299.049	277.769	416.157	471.541
chr4:65730816-65734415	238.595	-0.740707	0.220531	-3.35874	0.000782989	0.0302964	299.049	297.863	185.138	172.33
chr3:23663180-23664207	91.5421	-1.20986	0.360394	-3.35704	0.000787828	0.0304544	117.369	138.293	49.9067	60.5996
chr28:18066430-18072933	412.318	0.698091	0.208061	3.35523	0.000792994	0.0306247	384.261	247.037	540.119	477.853
chr2:120638330-120642046	218.899	0.789717	0.235458	3.35396	0.00079664	0.0307361	163.994	157.205	264.022	290.373
chr4:47342714-47344858	149.706	0.995375	0.296849	3.35314	0.000799004	0.0307979	88.4283	111.108	177.088	222.199
chr23:28063428-28066879	290.328	0.704002	0.209987	3.3526	0.000800549	0.030828	223.483	218.669	328.418	390.741
chr29:12607766-12608807	91.1729	1.23069	0.367126	3.35223	0.000801624	0.03084	54.6648	54.3718	119.937	135.718
chr8:101080333-101082734	266.895	-0.702055	0.209707	-3.3478	0.000814566	0.0313081	342.459	319.139	196.407	209.574
chr21:67776919-67778032	96.7529	1.20305	0.359412	3.34726	0.000816151	0.0313391	53.057	63.8277	125.572	144.555
chr25:1438280-1440386	308.856	-0.654768	0.195709	-3.34563	0.000820972	0.0314943	364.968	390.058	248.729	231.667
chr19:27872216-27874781	310.549	0.678244	0.202762	3.34502	0.000822773	0.0315035	249.207	229.307	353.372	410.31
chr3:54096831-54097846	94.2821	1.51773	0.453706	3.34517	0.00082231	0.0315035	75.566	23.6399	120.742	157.18
chr19:53807032-53808694	530.605	0.537473	0.160723	3.34409	0.000825521	0.0315787	387.477	476.344	634.298	624.303
chr3:16811548-16814475	355.938	-0.723489	0.216484	-3.342	0.000831773	0.0317878	493.591	394.786	219.75	315.623
chr4:98798281-98799943	132.815	1.10001	0.329198	3.34149	0.000833313	0.0318165	107.722	62.6457	174.673	186.218
chr27:36942890-36944307	116.549	1.07532	0.321895	3.34059	0.000836002	0.0318833	75.566	74.4657	163.404	152.762
chr3:14685843-14686999	122.357	-1.02618	0.307205	-3.34038	0.000836643	0.0318833	173.641	154.841	78.8848	82.062
chr5:78115283-78116946	104.06	1.16179	0.347854	3.33989	0.000838125	0.0319096	54.6648	73.2837	142.476	145.818
chr16:80626549-80628972	200.056	-0.803423	0.240631	-3.33882	0.000841351	0.0319721	255.638	252.947	152.135	139.505
chr5:109054874-109076447	4303.4	-0.218703	0.0655024	-3.33886	0.000841227	0.0319721	4697.96	4560.14	4080.27	3875.22
chr17:72766853-72775035	2326.77	0.294901	0.0883738	3.33698	0.000846949	0.0321546	2143.18	2036.58	2719.11	2408.2
chr28:26809676-26810917	140.492	-0.983556	0.294805	-3.3363	0.000849024	0.0322031	194.542	178.481	106.253	82.6933
chr15:62864466-62866075	144.321	1.0255	0.307617	3.3337	0.000856993	0.0324633	115.761	75.6477	185.138	200.736
chr24:33561599-33567062	943.532	0.411144	0.123336	3.33353	0.000857521	0.0324633	781.385	836.852	1144.63	1011.26
chr26:44056799-44065556	1654.7	0.330954	0.0992878	3.33328	0.000858299	0.0324633	1557.95	1375.84	1909.33	1775.7
chr12:20345733-20351023	783.283	0.443691	0.133197	3.33108	0.000865082	0.0326893	694.564	634.731	850.024	953.813
chr22:48703118-48706255	428.589	0.560495	0.168368	3.32899	0.000871618	0.0329054	337.635	354.598	518.386	503.735
chr23:31379164-31380878	174.584	0.895465	0.26913	3.32726	0.000877038	0.0330791	106.114	137.111	231.02	224.092
chr13:46282767-46283679	97.0268	-1.14871	0.34531	-3.32662	0.000879056	0.0331243	125.407	141.839	62.7858	58.0747
chr22:10620403-10621872	99.6339	1.24431	0.374232	3.32497	0.000884296	0.0332906	75.566	43.7338	147.305	131.93
chr13:79523834-79525441	77.5683	1.34761	0.405377	3.32435	0.000886258	0.0333334	51.4492	36.6418	111.083	111.099
chr1:49339875-49340740	89.2019	1.25307	0.377018	3.32363	0.00088853	0.0333572	61.0959	44.9158	129.596	121.199
chr16:45347467-45361607	1564.6	0.310641	0.0934716	3.32337	0.000889371	0.0333572	1387.52	1405.39	1763.64	1701.84
chr29:41992051-41995016	362.166	0.621555	0.187023	3.32341	0.000889246	0.0333572	307.087	264.767	424.207	452.604
chr17:72978380-72987558	769.441	-0.419013	0.126105	-3.32274	0.000891382	0.0333706	873.029	887.678	653.617	663.44
chr18:59946241-59950328	485.01	0.549931	0.165494	3.32296	0.000890662	0.0333706	360.144	425.518	598.88	555.497
chr17:10454044-10456041	287.541	0.694155	0.208948	3.32214	0.000893292	0.0334111	226.698	212.759	379.935	330.773
chr14:58452842-58454436	200.604	-0.794109	0.239069	-3.32168	0.000894772	0.0334355	257.246	251.765	145.695	147.712
chr23:31945881-31948007	185.806	0.888331	0.267474	3.32118	0.000896364	0.033464	136.662	124.109	272.877	209.574
chr19:8885159-8895606	1065.2	-0.36761	0.11072	-3.32016	0.000899645	0.0335244	1159.22	1239.91	942.593	919.095
chr28:26963735-26965344	266.044	-0.708655	0.213425	-3.3204	0.000898897	0.0335244	356.929	303.773	205.261	198.211
chr1:79154360-79157563	370.656	0.606359	0.182871	3.31578	0.000913888	0.0339611	300.656	287.225	469.284	425.46
chr17:53012764-53016072	483.128	0.547049	0.16496	3.31625	0.000912344	0.0339611	356.929	426.7	576.342	572.54
chr17:69270535-69272887	517.131	-0.506653	0.152796	-3.31589	0.000913518	0.0339611	596.489	617.001	440.306	414.729
chr7:33472524-33473467	137.204	1.11996	0.337867	3.31479	0.000917111	0.0340495	57.8804	113.471	198.822	178.643
chrX:18183202-18183977	74.2473	1.37059	0.413836	3.31192	0.000926581	0.0343695	46.6258	36.6418	98.2035	115.518
chr16:41529905-41535143	731.779	0.437252	0.132049	3.31128	0.000928698	0.0344164	598.097	644.187	857.268	827.564
chr23:9338277-9340122	200.802	0.912634	0.275686	3.31041	0.000931591	0.0344919	104.506	172.571	247.119	279.011
chr8:101281688-101285580	466.593	0.539968	0.163208	3.30847	0.000938056	0.0346995	360.144	399.514	550.584	556.128
chr1:118617342-118619210	230.213	0.777087	0.23503	3.30633	0.000945281	0.0349347	152.74	185.573	306.685	275.855
chr2:119363461-119365980	543.31	0.534446	0.161701	3.30515	0.000949252	0.0350494	459.827	427.882	703.523	582.009
chr8:85432994-85433996	98.5826	1.20472	0.364612	3.30411	0.000952775	0.0351473	57.8804	61.4637	115.912	159.074
chr20:38414439-38416914	240.957	0.749044	0.226776	3.30302	0.000956511	0.0352529	168.818	190.301	286.561	318.148
chr10:26663563-26675787	2505.53	0.253819	0.0768602	3.30234	0.000958809	0.0352731	2303.96	2268.25	2704.62	2745.29
chr2:44842684-44844803	137.587	0.982065	0.297368	3.30252	0.000958199	0.0352731	85.2128	99.2876	185.943	179.905
chr1:79134912-79137450	303.563	0.702057	0.212689	3.30086	0.000963876	0.0354227	199.366	261.221	397.644	356.023
chr11:102438524-102439574	98.3035	1.22725	0.371877	3.30016	0.000966294	0.0354227	43.4103	73.2837	137.646	138.874
chr2:79528875-79532039	353.741	0.72552	0.219846	3.30013	0.000966384	0.0354227	229.914	301.409	514.361	369.279
chr3:98001534-98002230	209.409	-0.78557	0.238014	-3.30052	0.000965052	0.0354227	284.578	245.855	156.965	150.237
chrX:37390305-37393073	290.504	-0.675172	0.204652	-3.29913	0.000969855	0.0355176	377.83	336.868	235.849	211.468
chr16:80860017-80860982	73.8142	-1.31739	0.399435	-3.29813	0.000973306	0.0356117	104.506	106.38	37.0275	47.3435
chr2:89702570-89707329	918.567	0.410708	0.124631	3.2954	0.000982816	0.0359271	725.112	849.854	1052.07	1047.24
chr11:62437464-62440875	188.689	0.829619	0.252046	3.29154	0.000996421	0.036359	138.27	133.565	248.729	234.192
chr18:62005500-62006460	189.677	0.865624	0.262985	3.29153	0.000996433	0.036359	135.054	133.565	276.097	213.992
chr12:18787656-18790910	297.277	0.683781	0.20781	3.29041	0.00100043	0.0364513	231.521	224.579	398.449	334.561
chr23:50735172-50737126	192.277	0.825894	0.251008	3.29031	0.00100077	0.0364513	147.916	130.019	243.094	248.08
chr5:113900507-113901776	305.025	-0.657526	0.199858	-3.28996	0.00100201	0.0364636	397.124	349.87	247.119	225.986
chr2:45646214-45648017	345.925	0.639145	0.194445	3.28702	0.00101252	0.0367912	258.854	281.315	457.21	386.323
chr5:26969126-26970196	110.046	1.11074	0.337927	3.28694	0.00101284	0.0367912	59.4882	79.1936	148.11	153.393
chr15:8279314-8280873	157.966	-0.890689	0.271225	-3.28395	0.00102365	0.0371505	202.581	208.031	103.838	117.412
chr5:98334066-98336846	452.019	0.539334	0.164256	3.28349	0.00102529	0.0371765	373.007	364.054	548.974	522.041
chr22:2796190-2800123	494.453	0.523972	0.159619	3.28265	0.00102837	0.0372548	406.77	404.242	612.564	554.234
chr8:73658462-73659762	165.322	-0.875501	0.266989	-3.27917	0.00104114	0.0376837	200.973	226.943	110.278	123.093
chr4:28406577-28410761	461.903	0.598877	0.182787	3.27637	0.00105151	0.0379908	315.126	417.244	598.88	516.359
chr5:104025520-104026415	289.017	0.78846	0.240646	3.27643	0.00105128	0.0379908	163.994	257.675	404.888	329.511
chr2:9783057-9783866	66.6792	1.41747	0.432762	3.2754	0.00105512	0.0380872	38.5869	34.2778	90.959	102.893
chr19:20210621-20211825	205.241	-0.779145	0.237997	-3.27377	0.00106125	0.0382741	257.246	261.221	158.574	143.924
chr19:40416619-40418558	177	-0.836657	0.255714	-3.27184	0.0010685	0.0384668	228.306	225.761	120.742	133.193
chr3:103879990-103885085	571.513	0.480602	0.14689	3.27184	0.00106849	0.0384668	490.375	464.524	672.13	659.021
chr10:26039134-26040294	148.696	0.93831	0.286999	3.26938	0.00107783	0.0386305	99.6828	104.016	209.286	181.799
chr13:40634476-40637746	283.893	0.68334	0.209009	3.26943	0.00107765	0.0386305	233.129	203.303	361.421	337.717
chr23:15350854-15351722	82.8973	1.33588	0.408579	3.26957	0.00107711	0.0386305	46.6258	47.2798	144.89	92.7932
chr5:19588724-19594298	643.492	0.475492	0.145401	3.27021	0.00107468	0.0386305	493.591	581.541	732.501	766.333
chr8:112929087-112931138	239.876	0.842165	0.257586	3.26946	0.00107754	0.0386305	149.524	192.665	365.446	251.867
chr12:86647028-86648149	182.02	-0.848554	0.259816	-3.26599	0.00109083	0.0390619	260.462	208.031	135.231	124.356
chr4:7711437-7713139	251.572	0.732326	0.224261	3.2655	0.00109269	0.0390937	170.426	206.849	302.66	326.354
chr12:21615708-21617206	182.064	0.843831	0.258464	3.26478	0.00109548	0.0391241	120.584	139.475	230.215	237.98
chr3:40255429-40256780	102.265	1.13422	0.347403	3.26485	0.00109524	0.0391241	64.3115	63.8277	128.791	152.13
chr22:10228623-10229528	153.204	-0.927197	0.284143	-3.26314	0.00110185	0.0392822	228.306	173.753	107.863	102.893
chr24:41720467-41722558	310.63	0.655474	0.200861	3.26332	0.00110114	0.0392822	220.267	261.221	379.13	381.904
chr3:18709217-18711664	655.415	0.449711	0.137896	3.26123	0.00110931	0.0395133	549.863	557.901	775.969	737.927
chr6:100819414-100824948	621.374	0.481161	0.147606	3.25977	0.00111504	0.0396823	496.806	540.172	677.765	770.752
chr7:21281358-21286919	1411.3	-0.339663	0.104225	-3.25895	0.00111825	0.0397613	1656.02	1499.95	1185.69	1303.52
chr14:61235629-61237527	276.736	0.729487	0.223894	3.25818	0.0011213	0.0397649	173.641	241.127	352.567	339.611
chr25:39008090-39009249	115.54	-1.05638	0.324199	-3.25845	0.00112023	0.0397649	136.662	174.935	80.4947	70.0683
chr8:65049561-65050768	82.1047	-1.35536	0.415968	-3.25832	0.00112075	0.0397649	131.839	104.016	60.371	32.1936
chr23:28673127-28675271	166.929	0.891657	0.273739	3.25733	0.00112467	0.0398494	115.761	118.199	196.407	237.349
chr17:68468050-68470114	260.803	-0.709842	0.218004	-3.25609	0.00112958	0.0399883	299.049	347.506	211.701	184.955
chr19:14770286-14772782	525.125	0.49767	0.152947	3.25387	0.00113845	0.0402667	446.965	424.336	623.834	605.365
chr2:127707235-127715393	1232.4	0.340212	0.104669	3.25037	0.00115255	0.0406942	1122.24	1054.34	1399	1354.02
chr29:28923857-28924658	69.8842	-1.32615	0.407981	-3.25052	0.00115194	0.0406942	93.2517	106.38	42.6622	37.2435
chr13:40614473-40615582	155.557	0.947831	0.291635	3.25006	0.00115381	0.0407029	112.545	100.47	176.283	232.93
chr5:51256966-51258097	108.435	1.13321	0.348718	3.24966	0.00115545	0.0407252	77.1738	59.0997	167.429	130.037
chr18:14898839-14905255	535.802	0.491194	0.151227	3.24806	0.00116195	0.0409185	434.103	456.25	631.078	621.778
chr24:53668742-53669826	135.142	0.992513	0.305613	3.24761	0.00116378	0.0409473	77.1738	102.834	181.918	178.643
chr11:37664362-37666068	283.291	0.684522	0.210808	3.24713	0.00116574	0.0409807	218.659	216.305	321.979	376.223
chr16:43160973-43162884	532.355	-0.506399	0.155985	-3.24647	0.00116846	0.0410406	643.115	606.363	470.894	409.048
chr5:103914050-103917089	641.828	0.485428	0.149687	3.24295	0.00118301	0.0415153	496.806	570.903	803.337	696.265
chr25:38993815-38994687	125.175	-1.02681	0.316663	-3.2426	0.00118443	0.0415293	172.033	164.297	68.4205	95.9494
chr22:29290806-29292599	152.107	0.951443	0.29358	3.24083	0.00119183	0.0417525	122.192	86.2856	194.797	205.155
chr7:46262621-46265767	632.154	0.468341	0.144573	3.23947	0.00119753	0.0419155	546.648	515.35	691.449	775.17
chr9:42991704-42996227	410.7	-0.637554	0.19697	-3.2368	0.00120876	0.0422721	409.986	588.633	311.514	332.667
chr8:99807260-99812639	1371.68	0.345651	0.106814	3.23601	0.00121214	0.0423534	1191.37	1223.36	1639.68	1432.3
chr10:21028385-21033036	1863.67	0.286363	0.0885789	3.23286	0.00122558	0.042745	1667.28	1690.25	2113.79	1983.38
chr11:98639206-98640562	94.9138	-1.13571	0.351325	-3.23264	0.00122652	0.042745	118.976	141.839	56.3463	62.4934
chr11:98656967-98657772	86.5508	-1.23279	0.38135	-3.23271	0.00122622	0.042745	99.6828	143.021	46.6869	56.8122
chr5:5565829-5567598	426.624	0.581579	0.179966	3.2316	0.00123099	0.0428636	332.812	349.87	564.268	459.547
chr2:91802829-91804157	94.4615	1.20486	0.373004	3.23015	0.00123727	0.0430452	45.0181	68.5557	124.767	139.505
chr7:15095515-15096508	93.1598	1.17282	0.36319	3.22923	0.00124124	0.0431463	51.4492	62.6457	130.401	128.143
chr25:21227027-21234004	1045.08	0.363342	0.11259	3.22713	0.00125037	0.0434263	938.948	890.042	1205.01	1146.34
chrX:102190575-102193189	143.46	1.03299	0.32017	3.22638	0.00125366	0.043503	67.5271	119.381	198.822	188.111
chr21:33238996-33240251	287.524	-0.65277	0.20237	-3.22563	0.00125695	0.0435796	366.576	336.868	218.141	228.511
chr14:15069807-15073529	555.125	0.484923	0.150369	3.22487	0.00126028	0.0436576	479.121	446.794	666.496	628.09
chr13:63895851-63897236	113.439	-1.1164	0.346271	-3.22407	0.0012638	0.0437422	192.935	118.199	70.0304	72.5933
chr3:54927975-54930557	364.603	0.614105	0.190579	3.22232	0.00127158	0.0439735	265.285	309.683	472.504	410.941
chr2:130768562-130772557	610.695	0.461604	0.143274	3.22182	0.0012738	0.0440125	498.414	528.352	726.062	689.952
chr1:79581086-79582798	134.582	0.97059	0.301431	3.21994	0.00128218	0.0442644	99.6828	82.7396	177.893	178.011
chr5:116311887-116312977	84.1418	1.25001	0.388252	3.2196	0.00128371	0.0442792	56.2726	43.7338	127.987	108.574
chr18:14590667-14594844	874.472	0.449537	0.139646	3.21913	0.00128582	0.044314	819.972	660.735	1081.04	936.138
chrX:13920333-13924707	502.132	0.513873	0.159693	3.21788	0.00129144	0.0444697	437.318	391.24	568.292	611.678
chr7:12732842-12742905	2580.64	0.244803	0.0760872	3.2174	0.0012936	0.0445061	2374.7	2349.81	2829.39	2768.65
chr14:60862249-60864832	288.251	-0.693954	0.21576	-3.21633	0.00129843	0.0446344	339.243	372.328	249.533	191.899
chr5:5574894-5577682	363.666	0.589902	0.183489	3.21492	0.00130483	0.0448161	274.932	304.955	441.111	433.666
chr10:26697677-26699661	385.651	0.611779	0.190454	3.21222	0.00131712	0.0449088	311.911	299.045	412.133	519.516
chr29:31837177-31839473	230.769	-0.743053	0.231262	-3.21303	0.00131342	0.0449088	278.147	299.045	189.967	155.918
chr3:23593047-23596990	831.197	-0.416563	0.129665	-3.21261	0.00131536	0.0449088	974.319	927.866	660.056	762.546
chr5:27039317-27042352	482.585	0.51591	0.160581	3.21278	0.00131456	0.0449088	376.222	417.244	567.487	569.384
chr5:75592968-75593972	65.2838	1.43171	0.445615	3.21288	0.0013141	0.0449088	40.1947	30.7319	106.253	83.9558
chr5:106841993-106844197	367.869	0.607246	0.18902	3.21261	0.00131534	0.0449088	284.578	297.863	483.773	405.26
chr7:2572986-2578142	1251.49	-0.370514	0.115348	-3.21213	0.00131754	0.0449088	1477.56	1345.11	1180.86	1002.42
chr9:81542192-81545588	338.62	0.625111	0.194587	3.2125	0.00131585	0.0449088	249.207	282.497	437.086	385.691
chrX:37196696-37198537	308.6	0.717434	0.223246	3.21365	0.00131058	0.0449088	188.111	276.587	410.523	359.179
chr10:35212008-35212524	79.4048	1.25849	0.391912	3.21116	0.00132202	0.0449854	45.0181	48.4618	114.302	109.837
chr7:49822788-49836431	6897.32	0.458396	0.142742	3.21135	0.00132113	0.0449854	5239.78	6379.23	7894.11	8076.16
chr1:56418972-56421525	394.897	0.675394	0.210384	3.21029	0.00132602	0.0450456	237.953	367.6	520.8	453.235
chr9:61100741-61103900	436.469	0.580676	0.180866	3.21052	0.00132494	0.0450456	308.695	388.876	557.828	490.478
chr11:19584234-19586909	158.719	0.879048	0.273866	3.20977	0.00132841	0.0450888	112.545	111.108	206.066	205.155
chr19:37700827-37703252	559.391	0.486335	0.151579	3.20845	0.00133451	0.0452578	443.749	486.982	679.375	627.459
chr16:41948547-41950770	357.357	0.620423	0.193463	3.20694	0.00134154	0.0453819	310.303	254.129	457.21	407.785
chr19:13723585-13727550	711.148	0.454189	0.141617	3.20715	0.00134055	0.0453819	543.432	654.825	801.727	844.608
chr5:1367763-1368500	171.955	-0.834526	0.260218	-3.20703	0.00134114	0.0453819	226.698	213.941	130.401	116.781
chr7:42642990-42645858	327.609	0.650114	0.202737	3.20668	0.00134275	0.0453847	282.971	228.125	425.012	374.329
chr27:35084620-35085535	67.0118	1.45596	0.454086	3.20636	0.00134425	0.0453975	45.0181	27.1859	111.888	83.9558
chr1:67072540-67074339	103.966	1.13863	0.355192	3.20567	0.00134749	0.0454309	78.7816	52.0078	139.256	145.818
chr7:20858339-20859474	147.759	-0.947771	0.295641	-3.20582	0.00134679	0.0454309	210.62	178.481	116.717	85.2182
chr11:71974095-71975529	172.449	0.868516	0.271016	3.20466	0.0013522	0.0455416	112.545	131.201	203.652	242.399
chr5:106907308-106907894	75.3568	-1.24815	0.389502	-3.20449	0.00135303	0.0455416	109.33	102.834	45.077	44.1872
chr4:113885229-113886969	285.743	0.66944	0.209033	3.20255	0.00136215	0.0458101	215.444	225.761	326.808	374.96
chr1:22102333-22104078	173.033	0.855458	0.267243	3.20105	0.00136929	0.0459751	128.623	118.199	206.066	239.242
chr23:37562690-37570791	1296.68	0.340265	0.106298	3.20104	0.00136933	0.0459751	1085.26	1202.09	1401.41	1497.95
chr3:101403222-101405044	165.466	-0.844562	0.263952	-3.19967	0.00137583	0.0461548	217.051	208.031	123.157	113.624
chr23:28372048-28376777	2373.04	0.266482	0.0833184	3.19836	0.00138213	0.0463276	2112.63	2196.15	2481.65	2701.73
chr13:54700244-54701721	172.897	-0.847384	0.265105	-3.19641	0.0013915	0.0465919	247.599	197.393	124.767	121.831
chr18:25043676-25046250	114.199	1.07237	0.335511	3.19624	0.00139232	0.0465919	85.2128	62.6457	165.014	143.924
chr26:10670836-10674056	174.539	0.846121	0.264749	3.19594	0.00139377	0.0466018	114.153	134.747	230.215	219.042
chr21:58714998-58716925	156.648	0.889061	0.278335	3.19421	0.00140213	0.0468038	106.114	113.471	192.382	214.624
chr5:74468628-74471394	334.87	0.668376	0.209245	3.19423	0.00140205	0.0468038	254.03	263.585	350.957	470.91
chr1:126743611-126744842	80.2256	1.28023	0.400903	3.19336	0.00140628	0.0469034	38.5869	54.3718	123.157	104.787
chr11:46958676-46960923	189.504	-0.847887	0.265687	-3.1913	0.00141633	0.0471997	234.737	252.947	111.888	158.443
chr1:13870171-13872429	159.396	-0.878544	0.275449	-3.18949	0.00142523	0.047262	183.288	229.307	109.473	115.518
chr1:79158741-79162294	256.642	0.689202	0.216079	3.18959	0.00142475	0.047262	192.935	199.757	325.198	308.679
chr14:14934195-14935735	480.466	0.514746	0.161381	3.18964	0.0014245	0.047262	379.438	411.334	546.559	584.534
chr16:27243431-27248210	598.744	0.486029	0.152383	3.18953	0.00142503	0.047262	535.393	463.342	739.746	656.496
chr23:27603782-27607111	403.968	0.622484	0.195142	3.1899	0.00142324	0.047262	278.147	356.962	437.891	542.872
chr6:36330666-36332258	89.769	1.23067	0.385762	3.19023	0.00142158	0.047262	40.1947	66.1917	129.596	123.093
chr16:80846228-80850212	994.193	-0.417764	0.131063	-3.1875	0.00143509	0.0475399	1252.47	1024.79	793.677	905.838
chr5:107159061-107159988	81.8614	1.26476	0.396808	3.18732	0.00143596	0.0475399	40.1947	55.5538	105.448	126.249
chr16:1580055-1593344	1866.3	0.28258	0.0886865	3.18628	0.00144116	0.0476729	1619.04	1746.99	2046.98	2052.18
chr13:67017952-67019225	153.822	1.00872	0.316764	3.18444	0.00145034	0.0479372	128.623	76.8297	231.825	178.011
chr2:129327468-129328938	164.061	0.874324	0.274676	3.18311	0.00145701	0.0481184	110.937	120.563	195.602	229.142
chr28:14065764-14066870	111.093	-1.07909	0.33912	-3.18202	0.00146253	0.0482217	149.524	152.477	57.1512	85.2182
chr8:76921807-76926904	841.994	0.39521	0.124194	3.1822	0.00146162	0.0482217	694.564	758.841	959.496	955.076
chr8:497258-498659	135.319	0.99345	0.312422	3.17984	0.00147358	0.0485465	72.3505	107.562	182.723	178.643
chr18:35326380-35328627	557.16	0.481636	0.151489	3.17934	0.0014761	0.0485898	488.768	442.066	669.716	628.09
chr18:56083862-56092931	1100.68	-0.355248	0.111801	-3.1775	0.00148553	0.0488603	1252.47	1219.82	916.029	1014.41
chr2:29920827-29921790	87.8366	1.22586	0.38583	3.17721	0.00148699	0.0488686	41.8025	62.6457	132.011	114.887
chr19:10604022-10607715	683.636	0.456608	0.143798	3.17535	0.00149658	0.0491436	519.315	631.185	788.043	796.002
chr15:22330896-22332830	190.671	0.794379	0.250273	3.17405	0.00150328	0.0492926	138.27	140.657	235.044	248.711
chr5:74685405-74686359	91.9021	1.18443	0.373167	3.174	0.00150356	0.0492926	46.6258	65.0097	136.036	119.937
chr12:31696356-31697212	70.8088	1.39091	0.438281	3.17355	0.00150585	0.0493276	28.9402	48.4618	114.302	91.5307
chr1:66971584-66973425	89.887	1.24147	0.391317	3.17253	0.00151117	0.0493815	38.5869	67.3737	119.132	134.455
chr11:73871270-73875181	450.198	-0.514648	0.162219	-3.17255	0.00151106	0.0493815	517.708	541.354	368.666	373.067
chr8:46763882-46764684	79.7041	-1.26908	0.399962	-3.17299	0.00150878	0.0493815	120.584	105.198	36.2226	56.8122
chrX:81218280-81219273	162.161	-0.857655	0.27041	-3.17169	0.00151555	0.0494848	199.366	218.669	106.253	124.356
chr17:72937440-72938409	165.609	-0.885342	0.279631	-3.16611	0.00154492	0.0503621	178.464	250.583	119.132	114.256
chr19:35163853-35166431	532.779	0.517956	0.163587	3.16624	0.00154425	0.0503621	387.477	486.982	607.735	648.921
chr10:42843807-42848108	851.681	0.388564	0.122804	3.16409	0.0015557	0.0506532	717.073	757.659	946.617	985.375
chr16:55229139-55239887	3284.97	0.229905	0.0726634	3.16396	0.00155636	0.0506532	2926.17	3119.28	3477.37	3617.04
chr26:16859498-16861575	160.45	0.879325	0.277969	3.16339	0.00155942	0.0507119	106.114	119.381	223.775	192.53
chr22:51398122-51401819	788.418	0.398017	0.125846	3.16274	0.00156292	0.0507848	689.741	671.373	894.296	898.263
chr5:1356357-1357382	144.804	0.969579	0.306631	3.16204	0.0015667	0.0508667	78.7816	115.835	208.481	176.118
chr22:50338373-50339480	120.914	1.06747	0.337649	3.16147	0.00156976	0.0509252	59.4882	95.7416	152.94	175.486
chr7:96009664-96011462	132.006	0.962801	0.304565	3.16123	0.00157104	0.0509257	80.3894	98.1056	174.673	174.855
chr14:1879659-1880565	69.6824	-1.33647	0.422924	-3.16008	0.00157725	0.0509683	78.7816	120.563	40.2473	39.1373
chr21:41823977-41825331	201.067	-0.775898	0.24553	-3.16009	0.0015772	0.0509683	245.992	261.221	162.599	134.455
chr23:9026661-9028125	154.897	0.907822	0.287266	3.16022	0.00157651	0.0509683	109.33	106.38	177.893	225.986
chr28:18056369-18058305	192.147	0.818858	0.259147	3.15982	0.00157867	0.0509683	122.192	154.841	262.413	229.142
chr8:23324048-23325528	159.678	0.882128	0.279167	3.15986	0.00157846	0.0509683	110.937	113.471	226.19	188.111
chr3:14549758-14550358	73.1215	-1.25275	0.3968	-3.15714	0.00159327	0.0513984	104.506	101.652	40.2473	46.081
chr19:42459054-42460011	86.286	1.18581	0.375629	3.15685	0.00159481	0.0514071	54.6648	50.8258	124.767	114.887
chr16:71089474-71092490	554.243	0.480091	0.152158	3.15521	0.00160383	0.0516565	434.103	490.528	632.688	659.652
chr1:135336687-135341178	434.806	-0.541356	0.171605	-3.15466	0.00160683	0.0517119	511.277	518.896	383.96	325.092
chr3:102067371-102069610	336.288	0.630405	0.199957	3.15269	0.00161771	0.0520207	268.501	260.039	364.641	451.972
chr6:13268799-13273249	638.287	0.446629	0.141679	3.15241	0.00161928	0.0520296	520.923	559.083	709.963	763.177
chr8:112099630-112100231	65.2018	-1.33401	0.423559	-3.14953	0.00163532	0.0525033	102.898	83.9216	38.6374	35.3498
chr23:7206581-7208590	106.824	1.06645	0.338631	3.14929	0.00163665	0.0525043	70.7427	67.3737	155.355	133.824
chr2:136177531-136178113	71.5142	1.32961	0.422239	3.14896	0.00163854	0.052523	45.0181	36.6418	113.497	90.8995
chr19:63286478-63288091	188.045	-0.79043	0.251047	-3.14854	0.00164091	0.0525572	241.168	235.217	148.915	126.881
chr5:50835328-50836532	108.496	1.11943	0.355804	3.14621	0.00165403	0.0529356	65.9193	70.9197	119.132	178.011
chr15:47884611-47885566	72.3218	1.33437	0.424169	3.14584	0.00165612	0.0529603	43.4103	39.0058	86.9342	119.937
chr17:12599665-12601675	174.405	0.834775	0.265393	3.14543	0.00165842	0.0529921	136.662	114.653	216.531	229.774
chr20:18514360-18515243	82.7289	1.25825	0.400075	3.14503	0.00166072	0.0530234	53.057	44.9158	96.5936	136.349
chr1:141350840-141351746	91.3159	1.21701	0.387165	3.14339	0.00167003	0.0532785	57.8804	52.0078	153.745	101.631
chr7:61736006-61738153	140.069	0.997519	0.317392	3.14286	0.00167303	0.0533322	117.369	70.9197	185.138	186.849
chr7:52729232-52731037	531.32	-0.474036	0.150867	-3.14207	0.00167758	0.0534351	633.468	602.817	433.866	455.129
chr17:58613558-58619235	613.703	-0.44139	0.140489	-3.14182	0.00167903	0.0534391	694.564	718.653	529.655	511.941
chr1:130518299-130520452	232.538	0.725331	0.230981	3.14022	0.00168822	0.0536891	181.68	169.025	309.904	269.542
chr23:7470395-7474970	638.468	0.450537	0.143498	3.13968	0.00169131	0.0537451	509.669	568.539	709.963	765.702
chr5:75541915-75544397	339.916	0.701522	0.223473	3.13919	0.00169418	0.0537843	202.581	313.229	385.569	458.285
chr8:39775244-39776591	208.357	0.754377	0.240323	3.13901	0.00169521	0.0537843	152.74	157.205	272.877	250.605
chr14:1432390-1434827	382.471	0.573692	0.182846	3.13756	0.00170358	0.0539439	281.363	332.141	470.089	446.291
chr28:26361506-26363882	191.969	0.804906	0.256548	3.13745	0.00170425	0.0539439	157.563	122.927	243.094	244.292
chr8:11563456-11564110	86.519	1.19039	0.379366	3.13783	0.00170201	0.0539439	54.6648	50.8258	132.011	108.574
chr3:14168263-14170512	234.475	-0.779837	0.24858	-3.13717	0.00170586	0.0539527	342.459	250.583	193.992	150.868
chr1:69150396-69151872	85.372	1.24723	0.397682	3.13626	0.00171117	0.0539936	64.3115	37.8238	117.522	121.831
chr3:16345456-16350464	525.843	-0.473875	0.151086	-3.13645	0.00171005	0.0539936	594.882	627.639	437.086	443.766
chr7:5734562-5736415	400.542	0.633651	0.202022	3.13655	0.0017095	0.0539936	268.501	358.144	428.232	547.291
chr22:38992280-38993410	244.209	0.751643	0.239724	3.13545	0.00171592	0.0540652	209.012	156.023	334.053	277.748
chr29:667596-672210	458.255	0.533858	0.170267	3.13541	0.00171612	0.0540652	374.615	374.692	496.652	587.059
chr3:33414680-33416367	134.041	0.952322	0.303783	3.13487	0.00171929	0.0541226	80.3894	101.652	175.478	178.643
chr26:44050103-44053769	452.674	0.516569	0.164857	3.13344	0.00172772	0.0542611	377.83	367.6	513.556	551.709
chr5:51273484-51277293	1017.72	0.36344	0.115985	3.1335	0.00172735	0.0542611	876.244	903.044	1200.18	1091.42
chr5:116390970-116395156	535.23	-0.54209	0.172992	-3.13361	0.00172668	0.0542611	557.902	709.197	480.553	393.266
chr11:2430763-2441808	1167.88	0.332958	0.106309	3.13198	0.00173634	0.0544859	1053.1	1015.33	1277.45	1325.62
chr13:77999255-78000509	146.016	0.898587	0.286926	3.13177	0.00173757	0.0544859	106.114	98.1056	183.528	196.318
chr16:1437264-1438943	239.528	0.702522	0.224418	3.13042	0.00174554	0.054693	191.327	173.753	302.66	290.373
chr7:22056806-22061138	540.906	0.510972	0.163318	3.1287	0.00175584	0.0549733	485.552	407.788	682.595	587.69
chr23:42712763-42715118	138.726	0.970433	0.310198	3.12843	0.00175744	0.0549808	109.33	79.1936	165.014	201.368
chr13:65233660-65234827	165.339	-0.913101	0.292029	-3.12674	0.00176754	0.0552538	242.776	189.119	136.036	93.4245
chr2:3953192-3954440	161.147	0.852329	0.272657	3.12601	0.00177194	0.0553484	112.545	117.017	214.921	200.105
chr5:104013440-104015336	129.829	0.965252	0.309085	3.12293	0.0017906	0.055888	94.8595	81.5576	158.574	184.324
chr29:17943409-17945802	285.466	0.655217	0.209904	3.12151	0.00179929	0.0561159	220.267	223.397	321.979	376.223
chr11:97615224-97616087	84.5783	-1.21287	0.388584	-3.12124	0.00180089	0.0561223	133.446	102.834	60.371	41.6623
chr3:33485240-33486539	86.1103	1.27476	0.408554	3.12018	0.00180741	0.0562821	67.5271	34.2778	123.962	118.674
chr10:82174070-82175510	170.843	0.885247	0.283889	3.11828	0.00181908	0.0565583	136.662	104.016	249.533	193.161
chr13:77776781-77777576	74.089	1.28266	0.411305	3.11851	0.00181771	0.0565583	45.0181	41.3698	115.912	94.0557
chr25:3739380-3744901	592.048	-0.493614	0.158398	-3.11629	0.00183144	0.0568987	741.19	645.369	441.916	539.716
chr1:71230421-71231894	144.503	0.912996	0.293139	3.11455	0.00184224	0.0570641	112.545	88.6496	189.967	186.849
chr12:30933922-30941214	814.124	-0.398441	0.127921	-3.11474	0.00184107	0.0570641	985.574	867.584	699.499	703.84
chr3:3219461-3222078	298.747	0.638651	0.205039	3.11478	0.00184082	0.0570641	212.228	254.129	360.616	368.017
chr5:71104424-71106749	254.108	0.709957	0.22795	3.11452	0.00184242	0.0570641	220.267	166.661	319.564	309.942
chr18:11772338-11775091	399.624	0.568995	0.182758	3.11338	0.00184961	0.0572428	286.186	355.78	489.408	467.122
chr15:38653262-38654986	288.068	-0.655811	0.2107	-3.11253	0.00185492	0.0573633	332.812	371.146	246.314	201.999
chr7:7761138-7762999	223.255	0.734185	0.235936	3.1118	0.00185948	0.0574604	167.21	167.843	301.05	256.917
chr21:34632674-34634579	292.696	0.671411	0.215788	3.11144	0.00186175	0.0574863	245.992	206.849	322.784	395.16
chr18:48612724-48616730	723.674	0.421738	0.135639	3.10927	0.00187549	0.0578663	596.489	639.459	870.952	787.795
chr10:26472444-26473071	73.051	1.2866	0.413899	3.10848	0.00188049	0.0579764	45.0181	40.1878	93.3738	113.624
chr25:26588323-26589386	128.465	0.998367	0.321489	3.10544	0.00189994	0.0585311	67.5271	102.834	173.064	170.436
chr6:113308426-113309933	256.391	0.741072	0.238791	3.10343	0.00191291	0.0588859	210.62	173.753	367.861	273.33
chr2:107319937-107321437	412.563	0.530638	0.171083	3.10163	0.00192457	0.0591995	329.597	345.142	483.773	491.741
chr3:14831297-14846796	2631.63	-0.241938	0.0780306	-3.10056	0.00193158	0.0593634	2868.29	2836.79	2325.49	2495.95
chr5:107485324-107486913	299.077	-0.627564	0.202416	-3.10036	0.00193284	0.0593634	384.261	342.778	220.555	248.711
chr8:94567036-94569768	256.755	0.717773	0.231543	3.09995	0.00193552	0.0594007	226.698	163.115	326.003	311.204
chr5:46469866-46470837	84.2938	1.17611	0.379446	3.09954	0.00193819	0.0594373	51.4492	52.0078	111.888	121.831
chr4:61313683-61314428	91.7088	1.15739	0.373459	3.0991	0.0019411	0.0594813	64.3115	49.6438	139.256	113.624
chr9:95965097-95967182	330.711	0.592014	0.191058	3.09861	0.00194434	0.0595354	270.108	257.675	408.108	386.954
chrX:2548531-2550131	154.432	0.874696	0.28236	3.0978	0.00194961	0.0596515	120.584	98.1056	196.407	202.63
chr28:7267912-7269797	186.011	-0.770206	0.248687	-3.09709	0.00195428	0.059749	236.345	232.853	132.816	142.03
chr13:44475112-44476607	138.931	0.933002	0.301396	3.0956	0.00196417	0.0600059	107.722	83.9216	192.382	171.699
chr2:9770214-9771580	140.7	0.915769	0.295881	3.09506	0.00196771	0.0600612	86.8205	107.562	180.308	188.111
chr3:86284627-86287523	565.933	0.495699	0.160168	3.09488	0.00196895	0.0600612	506.453	433.792	715.598	607.89
chr13:78708045-78713504	540.554	-0.487799	0.157627	-3.09464	0.00197054	0.0600644	680.094	582.723	473.309	426.091
chr6:71829479-71835856	497.871	0.488663	0.15799	3.09299	0.00198151	0.0603531	432.495	397.15	569.097	592.74
chr7:86923925-86926477	446.138	0.526001	0.170092	3.09246	0.00198507	0.0604159	397.124	335.686	524.02	527.722
chr18:14717765-14720968	266.448	0.654197	0.211584	3.09191	0.00198873	0.060436	212.228	202.121	327.613	323.829
chr21:67984961-68005396	4251.28	0.201609	0.0652017	3.09209	0.00198755	0.060436	3916.57	3992.78	4444.11	4651.65
chr12:19395021-19396355	67.3063	1.38251	0.447302	3.09078	0.0019963	0.0606206	48.2336	27.1859	96.5936	97.2119
chr19:53980208-53983677	305.463	0.65117	0.210703	3.09046	0.00199843	0.0606397	217.051	257.675	338.078	409.048
chr11:71983183-71986430	506.818	0.501478	0.162319	3.08945	0.00200525	0.0608009	389.085	449.158	563.463	625.565
chr4:65823198-65823979	75.9663	1.35653	0.439254	3.08826	0.00201334	0.0610003	53.057	33.0959	84.5194	133.193
chrUn_NW_020191203v1:8125-8614	116.421	-1.27001	0.41152	-3.08613	0.00202779	0.061392	165.602	164.297	35.4177	100.368
chr20:62721504-62722803	201.827	0.763372	0.247513	3.08417	0.00204122	0.0617523	141.485	157.205	271.267	237.349
chr21:26662461-26663496	180.597	-0.794018	0.257501	-3.08355	0.00204545	0.061834	217.051	241.127	121.547	142.662
chr28:24631831-24634168	209.109	0.739785	0.239931	3.08332	0.00204705	0.0618358	162.387	151.295	251.948	270.805
chr2:79498302-79500401	121.935	0.980033	0.317942	3.08243	0.00205318	0.0619747	90.0361	74.4657	169.844	153.393
chr5:47648739-47653448	521.029	0.474249	0.153868	3.08218	0.00205493	0.0619812	426.064	445.612	622.224	590.215
chr3:14762536-14764199	236.027	-0.689924	0.223932	-3.08096	0.00206337	0.0621892	299.049	283.679	191.577	169.805
chr6:44599191-44599745	70.5626	1.31472	0.426841	3.08011	0.00206923	0.0623193	43.4103	37.8238	86.1293	114.887
chr1:67061316-67062972	86.2103	1.15469	0.375062	3.07866	0.00207932	0.0625764	56.2726	50.8258	115.912	121.831
chr15:42982553-42984245	170.926	-0.831632	0.27022	-3.07761	0.00208671	0.0627255	209.012	228.125	139.256	107.312
chrUn_NW_020190567v1:22067-22320	144.895	-1.08705	0.353223	-3.07751	0.00208738	0.0627255	205.797	189.119	57.1512	127.512
chr14:10077855-10079463	306.505	-0.603076	0.196258	-3.07287	0.00212012	0.0636619	353.713	385.33	238.264	248.711
chr1:52640894-52641574	138.993	0.911329	0.296607	3.07251	0.00212265	0.0636905	106.114	87.4676	178.698	183.693
chr11:106217448-106219108	325.041	-0.602733	0.196217	-3.07177	0.00212794	0.0637544	355.321	427.882	254.363	262.598
chr20:66487435-66488555	76.9322	-1.26002	0.410169	-3.07196	0.00212659	0.0637544	81.9972	134.747	44.2721	46.7122
chr3:34615026-34616234	70.5429	1.29042	0.420156	3.07129	0.00213138	0.0638101	35.3713	46.0978	102.228	98.4744
chr1:111794353-111805223	1457.83	0.316049	0.102924	3.07071	0.0021355	0.0638861	1209.06	1385.3	1643.7	1593.27
chr13:65038547-65039724	66.2799	1.32153	0.430588	3.06912	0.00214692	0.0640853	35.3713	40.1878	97.3985	92.162
chr19:51333816-51335403	217.667	-0.759586	0.247486	-3.06921	0.00214626	0.0640853	265.285	282.497	136.036	186.849
chr29:26072596-26075415	379.735	0.572196	0.186419	3.06941	0.00214482	0.0640853	339.243	273.041	457.21	449.447
chr5:96903300-96905234	228.236	0.75516	0.246073	3.06884	0.0021489	0.0640971	199.366	141.839	271.267	300.473
chr27:35126058-35128044	218.92	0.716977	0.233658	3.06848	0.00215148	0.0641265	172.033	159.569	268.852	275.223
chr13:31450396-31452253	169.924	0.813327	0.26509	3.06812	0.00215412	0.0641577	128.623	118.199	215.726	217.149
chr17:10451143-10453593	196.609	0.764875	0.249353	3.06744	0.002159	0.0641611	133.446	157.205	252.753	243.03
chr4:47325148-47327084	97.9276	1.11415	0.363208	3.06752	0.00215842	0.0641611	72.3505	52.0078	144.89	122.462
chr5:25135877-25136901	92.7586	-1.16773	0.380656	-3.06767	0.00215736	0.0641611	138.27	118.199	71.6403	42.9247
chr11:72800416-72801488	74.6429	-1.22499	0.3996	-3.06555	0.00217268	0.0645202	93.2517	115.835	40.2473	49.2372
chr10:29495556-29496709	129.625	-0.944188	0.308062	-3.06493	0.00217722	0.0646073	188.111	153.659	78.8848	97.8432
chr26:23229882-23231601	370.872	0.589048	0.192213	3.06457	0.00217987	0.0646384	287.794	303.773	494.237	397.685
chr17:53007055-53009267	228.499	0.725578	0.2368	3.06409	0.0021833	0.0646927	159.171	184.391	309.1	261.336
chr19:55430544-55451308	3547.64	0.242415	0.0791286	3.06356	0.0021872	0.0647608	3008.17	3486.88	3861.33	3834.19
chr19:13877932-13879584	168.761	0.831372	0.271416	3.06309	0.00219062	0.0648145	123.8	119.381	196.407	235.455
chr19:42004127-42006003	204.863	-0.743786	0.242844	-3.06281	0.00219266	0.0648272	241.168	271.859	141.671	164.755
chr10:72894587-72898839	419.568	-0.525666	0.171782	-3.06008	0.00221276	0.0653735	501.63	489.346	321.174	366.123
chr14:23361489-23363406	240.972	0.745885	0.243912	3.05801	0.00222812	0.0657792	199.366	161.933	259.193	343.398
chr25:33747999-33748848	71.5211	-1.23487	0.404189	-3.05518	0.00224925	0.0663546	98.0751	102.834	37.8325	47.3435
chr16:55424891-55426488	141.484	-0.868101	0.284226	-3.05426	0.00225618	0.0664965	180.072	185.573	97.3985	102.893
chr5:1431037-1433227	457.986	-0.502628	0.164576	-3.05408	0.00225753	0.0664965	503.238	569.721	387.179	371.804
chr8:39474351-39480068	477.374	0.518433	0.169762	3.05388	0.002259	0.0664965	390.692	394.786	507.921	616.096
chr5:57423458-57424909	195.713	0.753306	0.24678	3.05254	0.00226911	0.0667452	151.132	140.657	245.509	245.555
chr12:11370995-11372198	117.605	0.993951	0.325688	3.05185	0.00227439	0.0668517	80.3894	76.8297	173.064	140.137
chr3:66705784-66746414	6476.52	0.187652	0.0615156	3.05049	0.00228469	0.0671058	5849.13	6259.84	6713.25	7083.85
chr13:12708492-12709793	221.533	0.722903	0.237064	3.0494	0.00229296	0.0671128	159.171	174.935	255.973	296.055
chr14:30868000-30872724	324.586	0.597487	0.195961	3.04901	0.00229595	0.0671128	237.953	277.769	385.569	397.054
chr23:10206804-10208256	203.072	0.75486	0.247541	3.04943	0.00229275	0.0671128	167.21	135.929	250.338	258.811
chr28:8827847-8829434	188.445	-0.770352	0.252634	-3.04928	0.00229391	0.0671128	260.462	215.123	142.476	135.718
chr28:45334190-45335384	116.732	0.992048	0.325376	3.04893	0.00229657	0.0671128	70.7427	85.1036	145.695	165.387
chr29:12507095-12508265	88.3513	1.12931	0.370307	3.04965	0.0022911	0.0671128	57.8804	53.1898	116.717	125.618
chr5:110158809-110164159	743.86	-0.470088	0.154127	-3.04999	0.00228847	0.0671128	733.151	992.876	600.49	648.921
chr13:54055657-54058275	170.374	0.834437	0.273788	3.04775	0.00230562	0.0673283	138.27	107.562	205.261	230.405
chr18:14433744-14438714	435.784	-0.523664	0.171833	-3.04751	0.00230745	0.0673332	538.609	490.528	330.833	383.166
chr21:69267163-69270508	388.456	0.558277	0.18327	3.0462	0.0023175	0.0675776	287.794	339.232	486.188	440.61
chr7:43853122-43854420	92.3375	-1.0847	0.356111	-3.04598	0.00231926	0.0675801	136.662	114.653	55.5413	62.4934
chr11:98649687-98651947	456.683	-0.489382	0.16069	-3.0455	0.00232291	0.0676376	538.609	528.352	379.13	380.642
chr9:38086640-38088125	95.7139	1.09401	0.359381	3.04415	0.00233337	0.0678931	53.057	68.5557	131.206	130.037
chr1:82967220-82968987	352.362	-0.612292	0.201171	-3.04364	0.00233731	0.0679589	459.827	393.604	242.289	313.729
chr13:81355078-81357103	264.512	0.655825	0.215517	3.04304	0.00234204	0.0680399	207.405	203.303	343.712	303.629
chr29:40755082-40761505	1122.8	-0.330796	0.108712	-3.04285	0.00234347	0.0680399	1284.62	1218.64	965.936	1021.99
chr5:106806891-106808798	178.005	0.836925	0.275067	3.04263	0.00234524	0.0680423	143.093	113.471	200.432	255.023
chr14:22006552-22008332	320.278	-0.579527	0.190514	-3.04192	0.00235076	0.0681046	385.869	381.784	252.753	260.705
chr3:21264298-21266698	377.146	0.544794	0.17909	3.042	0.00235008	0.0681046	313.519	300.227	458.015	436.822
chr14:46295493-46296312	76.8893	-1.2707	0.418035	-3.03969	0.00236821	0.0685608	86.8205	130.019	54.7364	35.981
chr16:24224492-24225497	108.901	-1.13668	0.374192	-3.0377	0.00238388	0.0689404	183.288	117.017	50.7116	84.587
chr17:15860219-15861480	95.4026	1.08417	0.356916	3.0376	0.00238474	0.0689404	59.4882	62.6457	137.646	121.831
chr19:24967722-24968848	102.946	-1.11095	0.365875	-3.03642	0.00239403	0.06911	155.955	125.291	81.2996	49.2372
chr22:48155372-48157760	342.192	-0.572797	0.18864	-3.03645	0.00239378	0.06911	421.24	397.15	292.196	258.18
chr10:50890147-50891515	132.602	-0.903121	0.297475	-3.03595	0.00239776	0.0691188	181.68	164.297	85.3243	99.1057
chr7:42949292-42950276	82.0812	1.18307	0.389679	3.03601	0.00239733	0.0691188	54.6648	46.0978	103.838	123.724
chr10:43542748-43544484	90.6443	1.26384	0.416454	3.03476	0.00240724	0.0693047	32.1558	73.2837	115.107	142.03
chr13:34495220-34497290	298.983	0.727112	0.239598	3.03471	0.00240764	0.0693047	281.363	171.389	346.127	397.054
chr19:33245266-33258453	3443	0.211745	0.0698463	3.03158	0.00243274	0.0699773	3157.7	3222.12	3780.83	3611.36
chr28:2890509-2891176	119.355	0.970842	0.320423	3.02987	0.00244658	0.0703252	88.4283	73.2837	164.209	151.499
chr7:37590092-37591915	193.549	-0.789981	0.260784	-3.02925	0.0024516	0.0704195	284.578	206.849	134.426	148.343
chr12:19111779-19113179	144.821	0.905344	0.298916	3.02876	0.00245562	0.0704845	83.605	117.017	195.602	183.061
chr14:66543380-66546101	290.118	-0.623693	0.205973	-3.02803	0.00246157	0.0706053	326.381	377.056	216.531	240.505
chr14:36429784-36430720	152.8	0.923389	0.305032	3.02719	0.00246837	0.0707499	81.9972	127.655	219.75	181.799
chr11:19587013-19589004	117.956	1.00927	0.333543	3.02589	0.00247899	0.0710039	65.9193	89.8316	174.673	141.399
chr5:33032545-33034533	439.853	0.521679	0.172437	3.02533	0.00248359	0.0710852	331.204	390.058	499.067	539.084
chr6:113292339-113295391	409.279	0.55851	0.184679	3.02422	0.00249279	0.0712476	366.576	296.681	519.996	453.866
chr7:62830208-62830966	99.3152	-1.07193	0.354445	-3.02424	0.0024926	0.0712476	152.74	117.017	55.5413	71.9621
chr14:10763269-10764194	82.7959	-1.32147	0.437214	-3.02249	0.00250708	0.0716052	162.387	74.4657	53.9314	40.3998
chr21:56462601-56465558	296.952	0.607609	0.201062	3.02201	0.00251106	0.0716682	226.698	243.491	362.226	355.392
chr16:51914910-51919742	640.161	0.419261	0.138833	3.0199	0.00252855	0.0721165	559.51	536.626	728.477	736.033
chr7:63651151-63653467	203.735	0.770349	0.25513	3.01944	0.00253247	0.072177	173.641	128.837	242.289	270.173
chr19:27386324-27391616	1441.02	0.290865	0.0963675	3.01829	0.00254205	0.0723991	1311.95	1281.28	1571.26	1599.58
chr1:110895654-110897594	238.704	-0.727511	0.241095	-3.01753	0.00254848	0.0725309	244.384	349.87	181.918	178.643
chr24:57176386-57177820	137.75	0.888879	0.2946	3.01724	0.00255088	0.0725481	101.291	92.1956	179.503	178.011
chr13:77347182-77350744	195.944	0.773291	0.256351	3.01653	0.00255687	0.072645	139.878	148.931	275.292	219.674
chr3:48516406-48518031	169.679	0.797192	0.264285	3.01641	0.00255788	0.072645	123.8	124.109	214.921	215.886
chr5:100453786-100456333	317.448	0.594009	0.196965	3.01581	0.00256296	0.0727381	239.56	265.949	367.861	396.423
chr1:43938121-43939747	73.0913	1.28199	0.425221	3.01488	0.00257084	0.0729103	51.4492	34.2778	115.107	91.5307
chr19:32780060-32781129	70.5308	-1.26252	0.419046	-3.01285	0.00258811	0.0733485	81.9972	117.017	37.0275	46.081
chr11:74247763-74248838	119.824	-0.948258	0.314784	-3.01241	0.00259179	0.0733709	157.563	158.387	72.4452	90.8995
chr18:61565457-61567045	291.655	0.614486	0.204001	3.01217	0.00259387	0.0733709	221.875	238.763	340.492	365.492
chr20:18556795-18561683	946.984	0.362126	0.120223	3.01211	0.00259435	0.0733709	834.442	822.668	1122.1	1008.73
chr2:135766584-135772919	561.276	-0.439497	0.145927	-3.01176	0.00259735	0.0734042	643.115	648.915	482.163	470.91
chr9:44649944-44651030	125.364	-0.947888	0.314837	-3.01073	0.0026062	0.0736027	191.327	139.475	82.9095	87.7432
chr7:94877777-94878748	109.392	1.11575	0.370788	3.00913	0.00261994	0.0739391	48.2336	88.6496	170.649	130.037
chr1:6851234-6857729	819.177	0.392361	0.13055	3.00544	0.00265195	0.0746337	721.897	696.195	866.928	991.688
chr15:35449711-35450477	68.43	1.31769	0.438404	3.00564	0.00265021	0.0746337	41.8025	36.6418	115.107	80.1683
chr15:42013651-42014629	131.59	0.906313	0.301552	3.00549	0.00265152	0.0746337	88.4283	94.5596	166.624	176.749
chr19:32986601-32994158	891.033	-0.361471	0.120264	-3.00565	0.00265011	0.0746337	1019.34	985.784	751.015	807.995
chr3:48614285-48616470	171.15	0.79191	0.26356	3.00466	0.00265876	0.0747212	125.407	125.291	211.701	222.199
chr3:67146238-67147670	87.1376	1.14418	0.380779	3.00483	0.00265725	0.0747212	57.8804	50.8258	134.426	105.418
chr9:69040197-69043956	494.898	0.482871	0.160735	3.00414	0.00266332	0.0747973	427.672	398.332	606.93	546.659
chr3:107040050-107042526	279.534	0.630117	0.209786	3.00362	0.0026679	0.0748737	204.189	234.035	330.833	349.079
chr5:119230935-119231750	67.247	-1.31462	0.437731	-3.00325	0.00267115	0.0749102	96.4673	95.7416	28.1731	48.606
chr7:57646032-57655561	1014.43	0.339886	0.11318	3.00305	0.00267291	0.0749102	905.185	886.496	1105.19	1160.86
chr21:57477550-57479966	451.947	0.494278	0.16461	3.00272	0.00267581	0.0749395	363.36	386.512	540.924	516.991
chr1:143132045-143134500	430.272	0.535793	0.178639	2.9993	0.00270603	0.0757332	313.519	387.694	484.578	535.297
chr1:107695953-107702913	867.681	0.398293	0.132814	2.99887	0.0027098	0.0757862	675.271	819.122	1026.31	950.026
chr3:108107911-108110266	553.522	0.446982	0.149067	2.99852	0.0027129	0.0758203	456.612	479.89	628.663	648.921
chr10:19558391-19559901	144.884	0.866209	0.289079	2.99644	0.00273153	0.0762353	106.114	99.2876	198.017	176.118
chr29:41092386-41097974	586.365	-0.479504	0.160018	-2.99656	0.00273048	0.0762353	638.292	725.745	543.339	438.085
chr25:40737114-40738212	185.965	-0.742735	0.247906	-2.99604	0.00273511	0.0762825	231.521	234.035	140.061	138.243
chr17:45181983-45185051	246.219	-0.654328	0.218448	-2.99536	0.00274123	0.0764005	297.441	304.955	181.113	201.368
chr10:97194944-97195922	74.9082	1.21266	0.405151	2.99309	0.00276168	0.0769172	46.6258	43.7338	112.693	96.5807
chr2:84658196-84660909	674.939	0.424728	0.141934	2.99244	0.0027676	0.0769787	553.079	598.089	822.655	725.933
chrUn_NW_020191562v1:20097-20350	73.2916	-1.24001	0.414383	-2.99243	0.0027677	0.0769787	118.976	87.4676	36.2226	50.4997
chr26:22541589-22547916	1491.48	0.303529	0.101469	2.99134	0.00277756	0.0771997	1287.84	1381.75	1564.82	1731.51
chr17:72696747-72698146	185.997	-0.75938	0.253922	-2.9906	0.00278427	0.0772797	254.03	213.941	144.085	131.93
chr18:7754195-7761621	969.799	0.371123	0.124093	2.99067	0.00278365	0.0772797	919.655	774.207	1117.27	1068.07
chr6:86331896-86333519	123.626	1.04433	0.349285	2.9899	0.00279072	0.0774055	56.2726	104.016	150.525	183.693
chr2:107314921-107318425	204.729	0.78968	0.264162	2.98938	0.00279542	0.0774295	163.994	137.111	217.336	300.473
chr22:12639102-12640101	141.058	0.870001	0.291023	2.98946	0.0027947	0.0774295	96.4673	102.834	187.553	177.38
chr1:152802406-152803512	73.177	1.24652	0.417063	2.9888	0.00280078	0.0775246	35.3713	50.8258	108.668	97.8432
chr21:23081922-23084735	321.917	0.638147	0.213591	2.9877	0.00281083	0.0777496	217.051	284.861	432.256	353.498
chr13:3952949-3954540	109.427	-0.98852	0.330986	-2.98659	0.00282104	0.0779786	135.054	156.023	65.2007	81.4308
chr13:31492519-31495040	485.202	0.517114	0.173225	2.98522	0.00283373	0.0782223	385.869	411.334	636.713	506.891
chr6:95264930-95266181	265.895	0.669127	0.224139	2.98533	0.00283272	0.0782223	175.249	234.035	320.369	333.929
chr14:1242869-1243388	65.4662	-1.38235	0.463416	-2.98295	0.00285489	0.0787104	127.015	62.6457	36.2226	35.981
chr26:31062665-31072187	1393.08	0.298813	0.100175	2.9829	0.00285532	0.0787104	1257.29	1242.28	1479.49	1593.27
chr3:14009324-14009570	72.011	-1.22204	0.40988	-2.98146	0.00286875	0.0789728	109.33	92.1956	49.9067	36.6123
chr8:52637165-52637859	96.0407	1.07216	0.359603	2.98152	0.00286826	0.0789728	67.5271	56.7357	119.132	140.768
chr3:19473264-19474837	82.5075	1.16018	0.389218	2.98081	0.00287489	0.079088	49.8414	52.0078	127.182	100.999
chr3:14335525-14336419	97.3516	-1.13182	0.379749	-2.98046	0.0028782	0.0791251	168.818	99.2876	53.1265	68.1746
chr19:9997429-9998297	83.1854	1.13994	0.38253	2.98001	0.00288242	0.0791332	53.057	50.8258	121.547	107.312
chrUn_NW_020190836v1:39838-40159	213.451	-0.879514	0.295137	-2.98002	0.00288233	0.0791332	289.402	264.767	101.423	198.211
chr14:63393085-63413376	6377.44	-0.19725	0.0662127	-2.97903	0.00289165	0.0793325	6415.07	7204.26	6050.78	5839.66
chr28:19678846-19679777	134.6	1.04225	0.349895	2.97875	0.00289425	0.0793501	65.9193	108.744	222.97	140.768
chr25:20236372-20238022	223.593	0.756788	0.254135	2.9779	0.00290232	0.0795173	135.054	196.211	257.583	305.523
chr14:14936629-14938642	567.791	0.439533	0.147666	2.97654	0.00291519	0.0798156	469.474	494.074	639.128	668.49
chr7:43694965-43701694	1882.24	0.26194	0.0880272	2.97567	0.00292353	0.0799899	1654.41	1767.08	2076.76	2030.72
chr22:43637220-43641414	813.169	0.42839	0.143983	2.97528	0.00292725	0.0800374	739.582	647.733	1032.75	832.614
chr10:50961682-50963745	95.2023	1.13888	0.382924	2.97416	0.00293795	0.080221	43.4103	74.4657	144.89	118.043
chr14:38965293-38966458	99.6392	-1.00698	0.338565	-2.97426	0.00293696	0.080221	130.231	135.929	63.5908	68.8058
chr14:1129506-1133235	701.107	-0.464216	0.1562	-2.97194	0.00295924	0.0807477	766.915	856.946	670.521	510.047
chr13:46315907-46319386	339.602	-0.612252	0.206051	-2.97136	0.00296483	0.0808458	358.537	462.16	242.289	295.423
chrUn_NW_020190858v1:28224-29057	69.6571	-1.27031	0.427554	-2.97111	0.00296725	0.080857	120.584	76.8297	37.0275	44.1872
chr22:10635374-10637000	82.3174	1.1389	0.383379	2.97068	0.00297139	0.0809152	48.2336	54.3718	114.302	112.362
chr10:20491263-20492754	165.603	0.849804	0.286151	2.96978	0.00298018	0.0810451	98.0751	137.111	233.435	193.793
chr10:102011411-102013250	150.787	-0.891037	0.300025	-2.96988	0.0029792	0.0810451	205.797	186.755	83.7145	126.881
chr16:75553355-75554076	69.2762	-1.32355	0.445759	-2.9692	0.00298572	0.0810893	67.5271	130.019	41.0523	38.506
chr20:24454796-24456788	178.87	0.77648	0.261512	2.96919	0.00298582	0.0810893	130.231	133.565	209.286	242.399
chr28:15570513-15572731	300.238	0.658086	0.22172	2.9681	0.00299646	0.0813236	268.501	198.575	402.473	331.404
chr15:32235055-32236172	96.0089	1.07576	0.362838	2.96484	0.00302844	0.0820855	54.6648	68.5557	117.522	143.293
chr22:21471782-21473736	199.023	0.797935	0.269134	2.96482	0.0030286	0.0820855	114.153	174.935	269.657	237.349
chr4:102728698-102731084	192.152	0.751778	0.253595	2.96448	0.00303193	0.0821206	155.955	131.201	230.215	251.236
chr16:41996653-41998233	484.267	0.508475	0.171592	2.96328	0.00304377	0.0822756	401.947	397.15	631.078	506.891
chr18:62107579-62109368	230.946	-0.664758	0.224323	-2.9634	0.00304262	0.0822756	287.794	278.951	171.454	185.586
chr6:13239326-13240892	108.57	1.01858	0.343713	2.96347	0.00304196	0.0822756	85.2128	59.0997	147.305	142.662
chr7:15155324-15161175	556.159	-0.44647	0.150702	-2.96259	0.00305061	0.0824053	612.567	670.191	450.77	491.11
chr11:63802568-63806348	704.055	0.430825	0.145438	2.96226	0.00305394	0.08244	625.429	575.631	733.306	881.851
chr2:94121632-94122958	146.253	0.874051	0.295088	2.962	0.00305651	0.0824541	117.369	89.8316	200.432	177.38
chr4:77512565-77513552	96.7344	1.06933	0.361051	2.96171	0.00305937	0.0824763	61.0959	63.8277	114.302	147.712
chr8:74788531-74799948	1635.12	0.289129	0.0977152	2.95889	0.00308748	0.0831785	1506.5	1437.31	1894.84	1701.84
chr14:60620143-60621647	103.758	1.00593	0.34005	2.95819	0.00309451	0.0833122	70.7427	67.3737	133.621	143.293
chr15:52671290-52673115	281.506	0.624077	0.210982	2.95796	0.00309686	0.08332	234.737	209.213	320.369	361.704
chr2:120652082-120654953	316.216	0.598597	0.202383	2.95775	0.00309897	0.0833211	279.755	224.579	385.569	374.96
chr6:115805595-115809114	651.896	-0.403339	0.13641	-2.95682	0.00310825	0.0835151	742.798	742.293	550.584	571.909
chr2:129366868-129368468	1543.3	-0.291379	0.0985728	-2.95598	0.00311679	0.0836887	1598.14	1796.63	1399.8	1378.64
chr14:65562332-65563848	126.311	-0.930761	0.314977	-2.95501	0.00312658	0.083896	184.896	146.567	97.3985	76.3808
chr22:32445377-32447018	121.672	0.927063	0.313911	2.95327	0.00314429	0.0842973	78.7816	88.6496	160.184	159.074
chrX:102032659-102034371	177.074	0.842457	0.285276	2.95313	0.00314572	0.0842973	139.878	114.653	186.748	267.017
chr8:86849416-86850801	220.658	0.693055	0.234717	2.95272	0.00314984	0.0843518	176.857	160.751	284.951	260.073
chr3:77166313-77167761	87.3658	1.19098	0.403547	2.95127	0.00316469	0.0846934	36.9791	68.5557	109.473	134.455
[truncated: 38,849 more rows]

## Sheet: STAT1 IFNG 2h vs UT
coordinates	baseMean	log2FoldChange	lfcSE	stat	pvalue	padj	MDBK_UT_STAT1_R1	MDBK_UT_STAT1_R2	MDBK_IFNG_2h_STAT1_R1	MDBK_IFNG_2h_STAT1_R2
[truncated: 39,637 more rows]

[truncated: 1 more sheets: pSTAT1 IFNG 2h vs UT]
