# Supplementary material for: Ruminant-specific retrotransposons shape regulatory evolution of bovine immunity
Source: HighWire-hosted journal article supplement (doi:10.1101/gr.276241.121), 2022-08-01
Supplement: Supplemental_Table_S5.xlsx [file Supplemental_Table_S5.xlsx]

## Sheet: Description
Supplemental Table S5
MDBK CUT&RUN motif analysis using XSTREME against JASPAR CORE 2018 vertebrates database
Only IFNG-inducible peaks with FDR < 0.05 and log2 fold change > 1 were used in this analysis
Sheets
IFNG-inducible H3K27ac	Motif enrichment for IFNG-inducible H3K27ac peaks
IFNG-inducible POL2RA	Motif enrichment for IFNG-inducible POL2RA peaks
IFNG-inducible STAT1	Motif enrichment for IFNG-inducible STAT1 peaks
IFNG-inducible pSTAT1	Motif enrichment for IFNG-inducible pSTAT1 peaks
Description of columns:
RANK	Rank of enrichment of motif in primary sequences relative to control based on SEA p-values
SEED_MOTIF
CLUSTER
SOURCE	Name of motif. If known, this is the identifier in JASPAR database
ID	Unique motif name
ALT_ID	Alternate name
CONSENSUS	Motif consensus
WIDTH	Motif width
SITES	Number of sites in primary sequences
SEA_PVALUE	Optimal enrichment p-value according to binomial test
EVALUE	p-value that has been adjusted by number of queried motifs
EVALUE_ACC
SIM_SOURCE	Motif source
SIM_MOTIF	Motif ID, if known
MOTIF_URL	Motif URL, if known

## Sheet: IFNG-inducible H3K27ac
RANK	SEED_MOTIF	CLUSTER	SOURCE	ID	ALT_ID	CONSENSUS	WIDTH	SITES	SEA_PVALUE	EVALUE	EVALUE_ACC	SIM_SOURCE	SIM_MOTIF	MOTIF_URL
1	1	1	STREME	1-AGAGTCGGACACGACTGAGC	STREME-1	AGAGTCGGACACGACTGAGC	20	1193	1.04e-455	1.21e-48	1	STREME	1-AGAGTCGGACACGACTGAGC
2	0	1	MEME	CTCAGTCGTGTCYGACTCTT	MEME-2	CTCAGTCGTGTCYGACTCTT	20	1585	2.19e-439	1.5e-186	1	MEME	CTCAGTCGTGTCYGACTCTT
3	0	1	MEME	TCAGTCGTGTCCGACTCTKT	MEME-13	TCAGTCGTGTCCGACTCTKT	20	498	2.35e-428	3.6e-75	1	MEME	TCAGTCGTGTCCGACTCTKT
4	1	2	STREME	3-ACTCCAGTAYTCTTGCCTG	STREME-3	ACTCCAGTAYTCTTGCCTG	19	1173	1.19e-418	1.87e-41	1	STREME	3-ACTCCAGTAYTCTTGCCTG
5	0	1	MEME	CTCAGTCRTGTCYGACTCT	MEME-21	CTCAGTCRTGTCYGACTCT	19	111	1.90e-414	1.3e-17	1	MEME	CTCAGTCRTGTCYGACTCT
6	0	2	MEME	CAGGCAAGAAYACTGGAGTG	MEME-14	CAGGCAAGAAYACTGGAGTG	20	687	4.24e-411	1.4e-67	1	MEME	CAGGCAAGAAYACTGGAGTG
7	0	2	MEME	CAGGCAAGAATACTGGAGTG	MEME-1	CAGGCAAGAATACTGGAGTG	20	1021	2.40e-407	4e-211	1	MEME	CAGGCAAGAATACTGGAGTG
8	1	3	STREME	2-GACCCCATGGACTGYAGC	STREME-2	GACCCCATGGACTGYAGC	18	1117	1.09e-398	1.69e-42	1	JASPAR2018_CORE_vertebrates_non-redundant.meme	MA0138.2 (REST)	http://jaspar2018.genereg.net/matrix/MA0138.2
9	1	4	MEME	TGGGATTCTCCAGGCAAGAA	MEME-17	TGGGATTCTCCAGGCAAGAA	20	138	1.69e-393	5.2e-28	1	MEME	TGGGATTCTCCAGGCAAGAA
10	1	5	MEME	GGKTGCCATTBCCTTCTCCA	MEME-16	GGKTGCCATTBCCTTCTCCA	20	477	2.57e-391	3.8e-51	1	MEME	GGKTGCCATTBCCTTCTCCA
11	1	6	MEME	RGAGGAGCCTGGTRGGCTRC	MEME-3	RGAGGAGCCTGGTRGGCTRC	20	1109	8.70e-372	1.3e-165	1	MEME	RGAGGAGCCTGGTRGGCTRC
12	0	3	MEME	AGTCCATGGGGTCGC	MEME-7	AGTCCATGGGGTCGC	15	913	3.03e-366	4.3e-103	1	MEME	AGTCCATGGGGTCGC
13	0	3	MEME	GAGAATCCCATGGAC	MEME-8	GAGAATCCCATGGAC	15	1028	1.80e-363	8.7e-103	1	MEME	GAGAATCCCATGGAC
14	0	5	MEME	TGGAGAAGGAAATGGCAACC	MEME-4	TGGAGAAGGAAATGGCAACC	20	1024	2.91e-359	1.7e-178	1	JASPAR2018_CORE_vertebrates_non-redundant.meme	MA1418.1 (IRF3)	http://jaspar2018.genereg.net/matrix/MA1418.1
15	0	6	MEME	GYAGCCYRCCAGGCTYCYCT	MEME-23	GYAGCCYRCCAGGCTYCYCT	20	458	1.42e-358	9.5e-15	1	MEME	GYAGCCYRCCAGGCTYCYCT
16	0	3	MEME	RTCCATGGGATTYTC	MEME-19	RTCCATGGGATTYTC	15	676	3.04e-358	2.4e-20	1	MEME	RTCCATGGGATTYTC
17	0	3	STREME	5-GARAATCCCATGGA	STREME-5	GARAATCCCATGGA	14	1133	6.45e-355	5.36e-37	1	STREME	5-GARAATCCCATGGA
18	0	5	STREME	6-GAAGGAAATGGCAACCC	STREME-6	GAAGGAAATGGCAACCC	17	1048	9.02e-352	1.74e-32	1	JASPAR2018_CORE_vertebrates_non-redundant.meme	MA1418.1 (IRF3)	http://jaspar2018.genereg.net/matrix/MA1418.1
19	0	3	MEME	GYGACCCCATRGAC	MEME-20	GYGACCCCATRGAC	14	500	3.78e-345	3.6e-21	1	MEME	GYGACCCCATRGAC
20	0	6	MEME	RGRGGAGCCTGGTGGGCTGC	MEME-15	RGRGGAGCCTGGTGGGCTGC	20	454	9.97e-341	1.9e-60	1	MEME	RGRGGAGCCTGGTGGGCTGC
21	0	7	JASPAR2018_CORE_vertebrates_non-redundant.meme	MA0050.2	IRF1	NTTYASTTTCACTTTCDBTTT	21	978	2.17e-328	1.36e-325	1	JASPAR2018_CORE_vertebrates_non-redundant.meme	MA0050.2	http://jaspar2018.genereg.net/matrix/MA0050.2
22	0	6	STREME	4-ACCAGGCTCCTCYG	STREME-4	ACCAGGCTCCTCYG	14	976	1.16e-311	4.04e-39	1	JASPAR2018_CORE_vertebrates_non-redundant.meme	MA0742.1 (Klf12)	http://jaspar2018.genereg.net/matrix/MA0742.1
23	1	7	STREME	7-ACTTTCACTTTY	STREME-7	ACTTTCACTTTY	12	1090	3.11e-270	1.34e-28	1	JASPAR2018_CORE_vertebrates_non-redundant.meme	MA0050.2 (IRF1)	http://jaspar2018.genereg.net/matrix/MA0050.2
24	0	7	MEME	AGTGAAAAGTGAAAGTGAAG	MEME-6	AGTGAAAAGTGAAAGTGAAG	20	643	1.96e-253	7.2e-106	1	JASPAR2018_CORE_vertebrates_non-redundant.meme	MA0050.2 (IRF1)	http://jaspar2018.genereg.net/matrix/MA0050.2
25	0	7	MEME	AAAGTGAAAGT	MEME-25	AAAGTGAAAGT	11	1088	7.38e-252	3.8e-08	1	JASPAR2018_CORE_vertebrates_non-redundant.meme	MA0050.2 (IRF1)	http://jaspar2018.genereg.net/matrix/MA0050.2
26	1	8	STREME	8-ACCCAGGGATCGAACCCRG	STREME-8	ACCCAGGGATCGAACCCRG	19	772	5.04e-242	1.9e-24	1	STREME	8-ACCCAGGGATCGAACCCRG
27	1	9	STREME	9-CAATGCAKGARA	STREME-9	CAATGCAKGARA	12	869	8.66e-239	1.73e-22	1	STREME	9-CAATGCAKGARA
28	0	7	JASPAR2018_CORE_vertebrates_non-redundant.meme	MA0051.1	IRF2	SGAAAGYGAAASCRWWWM	18	744	2.35e-231	1.47e-228	1	JASPAR2018_CORE_vertebrates_non-redundant.meme	MA0051.1	http://jaspar2018.genereg.net/matrix/MA0051.1
29	1	10	MEME	GGGATCTTCCCRACCCAGGG	MEME-5	GGGATCTTCCCRACCCAGGG	20	513	1.35e-225	2.8e-132	1	JASPAR2018_CORE_vertebrates_non-redundant.meme	MA0107.1 (RELA)	http://jaspar2018.genereg.net/matrix/MA0107.1
30	1	11	MEME	ATYGAACCCRGGTCTCCYGC	MEME-11	ATYGAACCCRGGTCTCCYGC	20	604	1.32e-213	2.2e-89	1	MEME	ATYGAACCCRGGTCTCCYGC
31	1	12	MEME	GGTAAAGAATCYGCCTGCAA	MEME-9	GGTAAAGAATCYGCCTGCAA	20	586	4.06e-212	2.6e-98	1	JASPAR2018_CORE_vertebrates_non-redundant.meme	MA0157.2 (FOXO3)	http://jaspar2018.genereg.net/matrix/MA0157.2
32	0	7	JASPAR2018_CORE_vertebrates_non-redundant.meme	MA0772.1	IRF7	HCGAAARYGAAAVT	14	1083	8.91e-211	5.59e-208	1	JASPAR2018_CORE_vertebrates_non-redundant.meme	MA0772.1	http://jaspar2018.genereg.net/matrix/MA0772.1
33	0	12	STREME	11-GGTAAAGAATCYGCCTG	STREME-11	11-GGTAAAGAATCYGCCTG	17	671	1.26e-207	2.67e-18	1	JASPAR2018_CORE_vertebrates_non-redundant.meme	MA0157.2 (FOXO3)	http://jaspar2018.genereg.net/matrix/MA0157.2
34	0	11	MEME	TYRAACCYRGGTCTCCTGCA	MEME-26	TYRAACCYRGGTCTCCTGCA	20	270	6.12e-205	2.5e-09	1	MEME	TYRAACCYRGGTCTCCTGCA
35	0	7	JASPAR2018_CORE_vertebrates_non-redundant.meme	MA1418.1	IRF3	NSRRAAMGGAAACCGAAACYR	21	773	6.71e-203	4.21e-200	1	JASPAR2018_CORE_vertebrates_non-redundant.meme	MA1418.1	http://jaspar2018.genereg.net/matrix/MA1418.1
36	0	7	JASPAR2018_CORE_vertebrates_non-redundant.meme	MA0517.1	STAT1::STAT2	THAGTTTCRKTTTCY	15	982	1.97e-202	1.23e-199	1	JASPAR2018_CORE_vertebrates_non-redundant.meme	MA0517.1	http://jaspar2018.genereg.net/matrix/MA0517.1
37	0	7	JASPAR2018_CORE_vertebrates_non-redundant.meme	MA0508.2	PRDM1	TCACTTTCWC	10	766	8.34e-201	5.23e-198	1	JASPAR2018_CORE_vertebrates_non-redundant.meme	MA0508.2	http://jaspar2018.genereg.net/matrix/MA0508.2
38	0	10	MEME	CCTGGGTCRGGAAGATCYSC	MEME-22	CCTGGGTCRGGAAGATCYSC	20	45	9.03e-197	1.2e-13	1	MEME	CCTGGGTCRGGAAGATCYSC
39	1	13	STREME	10-CTGAGCCACCAGGGAAGCCC	STREME-10	10-CTGAGCCACCAGGGAAGCCC	20	651	8.38e-194	1.15e-18	1	STREME	10-CTGAGCCACCAGGGAAGCCC
40	0	13	MEME	CTGAGCCACCAGGGAAGCCC	MEME-10	CTGAGCCACCAGGGAAGCCC	20	545	5.4e-190	4.6e-94	1	MEME	CTGAGCCACCAGGGAAGCCC
41	0	12	MEME	GGTAAAGAATCYRCCTGCAA	MEME-24	GGTAAAGAATCYRCCTGCAA	20	67	1.17e-187	5.9e-09	1	JASPAR2018_CORE_vertebrates_non-redundant.meme	MA0157.2 (FOXO3)	http://jaspar2018.genereg.net/matrix/MA0157.2
42	1	14	STREME	12-AGYGACTTAGCAG	STREME-12	12-AGYGACTTAGCAG	13	520	1.67e-148	1.62e-17	1	JASPAR2018_CORE_vertebrates_non-redundant.meme	MA0591.1 (Bach1::Mafk)	http://jaspar2018.genereg.net/matrix/MA0591.1
43	0	14	MEME	TGCTGCTGCTGCTAAGTCRC	MEME-12	TGCTGCTGCTGCTAAGTCRC	20	401	1.6e-145	1.2e-76	1	MEME	TGCTGCTGCTGCTAAGTCRC
44	0	7	JASPAR2018_CORE_vertebrates_non-redundant.meme	MA0652.1	IRF8	HCGAAACCGAAACT	14	596	3.71e-135	2.33e-132	1	JASPAR2018_CORE_vertebrates_non-redundant.meme	MA0652.1	http://jaspar2018.genereg.net/matrix/MA0652.1
45	1	15	STREME	15-AGCAGCAGCAGM	STREME-15	15-AGCAGCAGCAGM	12	305	1.12e-104	3.42e-05	1	JASPAR2018_CORE_vertebrates_non-redundant.meme	MA1100.1 (ASCL1)	http://jaspar2018.genereg.net/matrix/MA1100.1
46	0	7	JASPAR2018_CORE_vertebrates_non-redundant.meme	MA0653.1	IRF9	AACGAAACCGAAACT	15	476	8.87e-99	5.56e-96	1	JASPAR2018_CORE_vertebrates_non-redundant.meme	MA0653.1	http://jaspar2018.genereg.net/matrix/MA0653.1
47	0	5	STREME	14-GGAGTTGGTGATGGA	STREME-14	14-GGAGTTGGTGATGGA	15	184	1.15e-98	2.23e-05	1	STREME	14-GGAGTTGGTGATGGA
48	0	7	JASPAR2018_CORE_vertebrates_non-redundant.meme	MA1419.1	IRF4	HCGAAACCGAAACYA	15	655	5.73e-96	3.59e-93	1	JASPAR2018_CORE_vertebrates_non-redundant.meme	MA1419.1	http://jaspar2018.genereg.net/matrix/MA1419.1
49	1	16	JASPAR2018_CORE_vertebrates_non-redundant.meme	MA0144.2	STAT3	YTTCYKGGAAD	11	873	6e-83	3.76e-80	1	JASPAR2018_CORE_vertebrates_non-redundant.meme	MA0144.2	http://jaspar2018.genereg.net/matrix/MA0144.2
50	1	17	STREME	16-AAAAAAAAAAAAAAAAAAA	STREME-16	16-AAAAAAAAAAAAAAAAAAA	19	515	3.39e-79	3.48e-05	1	JASPAR2018_CORE_vertebrates_non-redundant.meme	MA1125.1 (ZNF384)	http://jaspar2018.genereg.net/matrix/MA1125.1
51	1	18	JASPAR2018_CORE_vertebrates_non-redundant.meme	MA1149.1	RARA::RXRG	RRGGTCAHNNNRRGGTCA	18	648	1.89e-78	1.19e-75	1	JASPAR2018_CORE_vertebrates_non-redundant.meme	MA1149.1	http://jaspar2018.genereg.net/matrix/MA1149.1
52	0	23	JASPAR2018_CORE_vertebrates_non-redundant.meme	MA0152.1	NFATC2	TTTTCCA	7	473	4.61e-74	2.89e-71	1	JASPAR2018_CORE_vertebrates_non-redundant.meme	MA0152.1	http://jaspar2018.genereg.net/matrix/MA0152.1
53	0	14	JASPAR2018_CORE_vertebrates_non-redundant.meme	MA0591.1	Bach1::Mafk	RSSATGACTCAGCAB	15	859	6.09e-73	3.82e-70	1	JASPAR2018_CORE_vertebrates_non-redundant.meme	MA0591.1	http://jaspar2018.genereg.net/matrix/MA0591.1
54	1	19	JASPAR2018_CORE_vertebrates_non-redundant.meme	MA0813.1	TFAP2B(var.3)	TGCCCYBRGGGCA	13	955	4.75e-66	2.98e-63	1	JASPAR2018_CORE_vertebrates_non-redundant.meme	MA0813.1	http://jaspar2018.genereg.net/matrix/MA0813.1
55	0	17	MEME	TDDTTTTTTTTTTTTTTTTT	MEME-18	TDDTTTTTTTTTTTTTTTTT	20	654	9.42e-66	2.6e-29	1	JASPAR2018_CORE_vertebrates_non-redundant.meme	MA1125.1 (ZNF384)	http://jaspar2018.genereg.net/matrix/MA1125.1
56	1	20	STREME	13-ACACACACACACACAY	STREME-13	13-ACACACACACACACAY	16	326	3.41e-65	3.01e-06	1	STREME	13-ACACACACACACACAY
57	0	19	JASPAR2018_CORE_vertebrates_non-redundant.meme	MA0815.1	TFAP2C(var.3)	TGCCCYSRGGGCA	13	975	6.04e-64	3.79e-61	1	JASPAR2018_CORE_vertebrates_non-redundant.meme	MA0815.1	http://jaspar2018.genereg.net/matrix/MA0815.1
58	1	21	JASPAR2018_CORE_vertebrates_non-redundant.meme	MA0150.2	Nfe2l2	CASNATGACTCAGCA	15	434	1.97e-62	1.24e-59	1	JASPAR2018_CORE_vertebrates_non-redundant.meme	MA0150.2	http://jaspar2018.genereg.net/matrix/MA0150.2
59	1	22	JASPAR2018_CORE_vertebrates_non-redundant.meme	MA0107.1	RELA	GGGRATTTCC	10	552	3.17e-62	1.99e-59	1	JASPAR2018_CORE_vertebrates_non-redundant.meme	MA0107.1	http://jaspar2018.genereg.net/matrix/MA0107.1
60	0	21	JASPAR2018_CORE_vertebrates_non-redundant.meme	MA0478.1	FOSL2	KRRTGASTCAB	11	936	3.37e-55	2.12e-52	1	JASPAR2018_CORE_vertebrates_non-redundant.meme	MA0478.1	http://jaspar2018.genereg.net/matrix/MA0478.1
61	0	19	JASPAR2018_CORE_vertebrates_non-redundant.meme	MA0872.1	TFAP2A(var.3)	TGCCCYSRGGGCA	13	1011	2.17e-53	1.36e-50	1	JASPAR2018_CORE_vertebrates_non-redundant.meme	MA0872.1	http://jaspar2018.genereg.net/matrix/MA0872.1
62	0	27	JASPAR2018_CORE_vertebrates_non-redundant.meme	MA0528.1	ZNF263	GGAGGAGGRRGRGGRGGRRGR	21	481	3.16e-52	1.98e-49	1	JASPAR2018_CORE_vertebrates_non-redundant.meme	MA0528.1	http://jaspar2018.genereg.net/matrix/MA0528.1
63	1	23	STREME	19-GACTCATTGGAAAAGA	STREME-19	19-GACTCATTGGAAAAGA	16	169	3.6e-49	0.00399	1	JASPAR2018_CORE_vertebrates_non-redundant.meme	MA0152.1 (NFATC2)	http://jaspar2018.genereg.net/matrix/MA0152.1
64	0	21	JASPAR2018_CORE_vertebrates_non-redundant.meme	MA0501.1	MAF::NFE2	ATGACTCAGCANWTY	15	361	4.18e-49	2.62e-46	1	JASPAR2018_CORE_vertebrates_non-redundant.meme	MA0501.1	http://jaspar2018.genereg.net/matrix/MA0501.1
65	0	21	JASPAR2018_CORE_vertebrates_non-redundant.meme	MA1101.1	BACH2	NMTGACTCAGCANH	14	1373	1.53e-45	9.58e-43	1	JASPAR2018_CORE_vertebrates_non-redundant.meme	MA1101.1	http://jaspar2018.genereg.net/matrix/MA1101.1
66	0	16	JASPAR2018_CORE_vertebrates_non-redundant.meme	MA0137.3	STAT1	TTTCYRGGAAA	11	1108	3.32e-44	2.08e-41	1	JASPAR2018_CORE_vertebrates_non-redundant.meme	MA0137.3	http://jaspar2018.genereg.net/matrix/MA0137.3
67	0	22	JASPAR2018_CORE_vertebrates_non-redundant.meme	MA0101.1	REL	BGGRNWTTCC	10	639	2.5e-42	1.56e-39	1	JASPAR2018_CORE_vertebrates_non-redundant.meme	MA0101.1	http://jaspar2018.genereg.net/matrix/MA0101.1
68	1	24	STREME	20-CTGATGCTGGGARRGAT	STREME-20	20-CTGATGCTGGGARRGAT	17	143	9.58e-42	0.00826	1	STREME	20-CTGATGCTGGGARRGAT
69	0	21	JASPAR2018_CORE_vertebrates_non-redundant.meme	MA1134.1	FOS::JUNB	KATGASTCATHN	12	777	9.12e-40	5.72e-37	1	JASPAR2018_CORE_vertebrates_non-redundant.meme	MA1134.1	http://jaspar2018.genereg.net/matrix/MA1134.1
70	0	21	JASPAR2018_CORE_vertebrates_non-redundant.meme	MA0477.1	FOSL1	RRTGASTCAKV	11	550	9.81e-40	6.15e-37	1	JASPAR2018_CORE_vertebrates_non-redundant.meme	MA0477.1	http://jaspar2018.genereg.net/matrix/MA0477.1
71	1	25	STREME	18-CCCCTTCTCCTCCTGCCCYC	STREME-18	18-CCCCTTCTCCTCCTGCCCYC	20	160	3.18e-38	0.000922	1	JASPAR2018_CORE_vertebrates_non-redundant.meme	MA0528.1 (ZNF263)	http://jaspar2018.genereg.net/matrix/MA0528.1
72	1	26	JASPAR2018_CORE_vertebrates_non-redundant.meme	MA1136.1	FOSB::JUNB(var.2)	RTGACGTCAT	10	1182	9.32e-37	5.84e-34	1	JASPAR2018_CORE_vertebrates_non-redundant.meme	MA1136.1	http://jaspar2018.genereg.net/matrix/MA1136.1
73	1	27	MEME	RRRGRDKRRRRSARRRGARR	MEME-27	RRRGRDKRRRRSARRRGARR	20	1588	1.26e-36	5.9e-07	1	JASPAR2018_CORE_vertebrates_non-redundant.meme	MA0528.1 (ZNF263)	http://jaspar2018.genereg.net/matrix/MA0528.1
74	0	21	JASPAR2018_CORE_vertebrates_non-redundant.meme	MA1130.1	FOSL2::JUN	NNRTGAGTCAYN	12	832	3.65e-36	2.29e-33	1	JASPAR2018_CORE_vertebrates_non-redundant.meme	MA1130.1	http://jaspar2018.genereg.net/matrix/MA1130.1
75	0	21	JASPAR2018_CORE_vertebrates_non-redundant.meme	MA0491.1	JUND	DRTGASTCATS	11	527	4.71e-36	2.96e-33	1	JASPAR2018_CORE_vertebrates_non-redundant.meme	MA0491.1	http://jaspar2018.genereg.net/matrix/MA0491.1
76	0	21	JASPAR2018_CORE_vertebrates_non-redundant.meme	MA0490.1	JUNB	NRRTGASTCAK	11	525	6.49e-36	4.07e-33	1	JASPAR2018_CORE_vertebrates_non-redundant.meme	MA0490.1	http://jaspar2018.genereg.net/matrix/MA0490.1
77	1	28	STREME	17-TGATGCCATCCARCCATCT	STREME-17	17-TGATGCCATCCARCCATCT	19	165	4.39e-34	0.000922	1	JASPAR2018_CORE_vertebrates_non-redundant.meme	MA0739.1 (Hic1)	http://jaspar2018.genereg.net/matrix/MA0739.1
78	0	21	JASPAR2018_CORE_vertebrates_non-redundant.meme	MA0476.1	FOS	DVTGASTCATB	11	506	5.98e-34	3.75e-31	1	JASPAR2018_CORE_vertebrates_non-redundant.meme	MA0476.1	http://jaspar2018.genereg.net/matrix/MA0476.1
79	0	21	JASPAR2018_CORE_vertebrates_non-redundant.meme	MA1141.1	FOS::JUND	NKATGAGTCATNN	13	931	2.07e-32	1.3e-29	1	JASPAR2018_CORE_vertebrates_non-redundant.meme	MA1141.1	http://jaspar2018.genereg.net/matrix/MA1141.1
80	1	29	JASPAR2018_CORE_vertebrates_non-redundant.meme	MA0138.2	REST	TTCAGCACCATGGACAGCDCC	21	982	2.21e-32	1.39e-29	1	JASPAR2018_CORE_vertebrates_non-redundant.meme	MA0138.2	http://jaspar2018.genereg.net/matrix/MA0138.2
81	1	30	JASPAR2018_CORE_vertebrates_non-redundant.meme	MA0503.1	Nkx2-5(var.2)	ARSCACTCAAS	11	1126	1.05e-31	6.61e-29	1	JASPAR2018_CORE_vertebrates_non-redundant.meme	MA0503.1	http://jaspar2018.genereg.net/matrix/MA0503.1
82	0	21	JASPAR2018_CORE_vertebrates_non-redundant.meme	MA0489.1	JUN(var.2)	RRRRRRTGASTCAT	14	541	1.87e-31	1.17e-28	1	JASPAR2018_CORE_vertebrates_non-redundant.meme	MA0489.1	http://jaspar2018.genereg.net/matrix/MA0489.1
83	0	21	JASPAR2018_CORE_vertebrates_non-redundant.meme	MA0099.3	FOS::JUN	ATGAGTCAYM	10	484	1.97e-30	1.24e-27	1	JASPAR2018_CORE_vertebrates_non-redundant.meme	MA0099.3	http://jaspar2018.genereg.net/matrix/MA0099.3
84	1	31	JASPAR2018_CORE_vertebrates_non-redundant.meme	MA0734.1	GLI2	GCGACCACMCTR	12	352	4.63e-30	2.91e-27	1	JASPAR2018_CORE_vertebrates_non-redundant.meme	MA0734.1	http://jaspar2018.genereg.net/matrix/MA0734.1
85	1	32	MEME	CCCCCMAYCCCHSCC	MEME-28	CCCCCMAYCCCHSCC	15	133	5.24e-30	0.0048	1	JASPAR2018_CORE_vertebrates_non-redundant.meme	MA0599.1 (KLF5)	http://jaspar2018.genereg.net/matrix/MA0599.1
86	0	21	JASPAR2018_CORE_vertebrates_non-redundant.meme	MA0462.1	BATF::JUN	RRWATGASTCA	11	1269	1.89e-28	1.19e-25	1	JASPAR2018_CORE_vertebrates_non-redundant.meme	MA0462.1	http://jaspar2018.genereg.net/matrix/MA0462.1
87	0	26	JASPAR2018_CORE_vertebrates_non-redundant.meme	MA0018.3	CREB1	NVTGACGTCABN	12	1144	7.32e-27	4.59e-24	1	JASPAR2018_CORE_vertebrates_non-redundant.meme	MA0018.3	http://jaspar2018.genereg.net/matrix/MA0018.3
88	0	21	JASPAR2018_CORE_vertebrates_non-redundant.meme	MA1128.1	FOSL1::JUN	NKATGACTCATNN	13	985	3.07e-26	1.92e-23	1	JASPAR2018_CORE_vertebrates_non-redundant.meme	MA1128.1	http://jaspar2018.genereg.net/matrix/MA1128.1
89	0	26	JASPAR2018_CORE_vertebrates_non-redundant.meme	MA1131.1	FOSL2::JUN(var.2)	GRTGACGTMAT	11	939	2.13e-24	1.33e-21	1	JASPAR2018_CORE_vertebrates_non-redundant.meme	MA1131.1	http://jaspar2018.genereg.net/matrix/MA1131.1
90	0	21	JASPAR2018_CORE_vertebrates_non-redundant.meme	MA1144.1	FOSL2::JUND	KATGACTCAT	10	453	2.56e-24	1.6e-21	1	JASPAR2018_CORE_vertebrates_non-redundant.meme	MA1144.1	http://jaspar2018.genereg.net/matrix/MA1144.1
91	0	18	JASPAR2018_CORE_vertebrates_non-redundant.meme	MA0159.1	RARA::RXRA	RGKTCANVGRSAGGTCA	17	1070	4.89e-24	3.06e-21	1	JASPAR2018_CORE_vertebrates_non-redundant.meme	MA0159.1	http://jaspar2018.genereg.net/matrix/MA0159.1
92	0	16	JASPAR2018_CORE_vertebrates_non-redundant.meme	MA0518.1	Stat4	YTTCYRGGAARNVR	14	548	5.56e-24	3.48e-21	1	JASPAR2018_CORE_vertebrates_non-redundant.meme	MA0518.1	http://jaspar2018.genereg.net/matrix/MA0518.1
93	0	21	JASPAR2018_CORE_vertebrates_non-redundant.meme	MA1142.1	FOSL1::JUND	NRTGACTCAT	10	898	1.49e-23	9.36e-21	1	JASPAR2018_CORE_vertebrates_non-redundant.meme	MA1142.1	http://jaspar2018.genereg.net/matrix/MA1142.1
94	0	21	JASPAR2018_CORE_vertebrates_non-redundant.meme	MA1135.1	FOSB::JUNB	KRTGASTCAT	10	458	3.33e-23	2.09e-20	1	JASPAR2018_CORE_vertebrates_non-redundant.meme	MA1135.1	http://jaspar2018.genereg.net/matrix/MA1135.1
95	0	31	JASPAR2018_CORE_vertebrates_non-redundant.meme	MA0695.1	ZBTB7C	RCGACCACCGAN	12	546	4.52e-23	2.83e-20	1	JASPAR2018_CORE_vertebrates_non-redundant.meme	MA0695.1	http://jaspar2018.genereg.net/matrix/MA0695.1
96	0	21	JASPAR2018_CORE_vertebrates_non-redundant.meme	MA0655.1	JDP2	ATGACTCAT	9	587	2.84e-22	1.78e-19	1	JASPAR2018_CORE_vertebrates_non-redundant.meme	MA0655.1	http://jaspar2018.genereg.net/matrix/MA0655.1
97	1	33	JASPAR2018_CORE_vertebrates_non-redundant.meme	MA0608.1	Creb3l2	GCCACGTGD	9	1194	1.69e-21	1.06e-18	1	JASPAR2018_CORE_vertebrates_non-redundant.meme	MA0608.1	http://jaspar2018.genereg.net/matrix/MA0608.1
98	0	21	JASPAR2018_CORE_vertebrates_non-redundant.meme	MA1137.1	FOSL1::JUNB	NDRTGACTCATNN	13	966	4.13e-21	2.59e-18	1	JASPAR2018_CORE_vertebrates_non-redundant.meme	MA1137.1	http://jaspar2018.genereg.net/matrix/MA1137.1
99	1	34	JASPAR2018_CORE_vertebrates_non-redundant.meme	MA1124.1	ZNF24	CATTCATTCATTC	13	835	6.69e-21	4.19e-18	1	JASPAR2018_CORE_vertebrates_non-redundant.meme	MA1124.1	http://jaspar2018.genereg.net/matrix/MA1124.1
100	0	21	JASPAR2018_CORE_vertebrates_non-redundant.meme	MA1138.1	FOSL2::JUNB	KRTGASTCAT	10	362	1.11e-20	6.93e-18	1	JASPAR2018_CORE_vertebrates_non-redundant.meme	MA1138.1	http://jaspar2018.genereg.net/matrix/MA1138.1
101	0	21	JASPAR2018_CORE_vertebrates_non-redundant.meme	MA0089.1	MAFG::NFE2L1	NATGAC	6	784	2.01e-20	1.26e-17	1	JASPAR2018_CORE_vertebrates_non-redundant.meme	MA0089.1	http://jaspar2018.genereg.net/matrix/MA0089.1
102	1	35	JASPAR2018_CORE_vertebrates_non-redundant.meme	MA0640.1	ELF3	WACCCGGAAGTAR	13	1180	1.61e-19	1.01e-16	1	JASPAR2018_CORE_vertebrates_non-redundant.meme	MA0640.1	http://jaspar2018.genereg.net/matrix/MA0640.1
103	0	35	JASPAR2018_CORE_vertebrates_non-redundant.meme	MA0076.2	ELK4	BCRCTTCCGGB	11	1230	2.84e-18	1.78e-15	1	JASPAR2018_CORE_vertebrates_non-redundant.meme	MA0076.2	http://jaspar2018.genereg.net/matrix/MA0076.2
104	0	21	JASPAR2018_CORE_vertebrates_non-redundant.meme	MA1143.1	FOSL1::JUND(var.2)	RTGACGTMAY	10	1363	1.17e-17	7.35e-15	1	JASPAR2018_CORE_vertebrates_non-redundant.meme	MA1143.1	http://jaspar2018.genereg.net/matrix/MA1143.1
105	0	18	JASPAR2018_CORE_vertebrates_non-redundant.meme	MA0017.2	NR2F1	CARAGGTCAMVNG	13	1334	3.21e-17	2.01e-14	1	JASPAR2018_CORE_vertebrates_non-redundant.meme	MA0017.2	http://jaspar2018.genereg.net/matrix/MA0017.2
106	1	36	JASPAR2018_CORE_vertebrates_non-redundant.meme	MA0052.3	MEF2A	KCTAWAAATAGM	12	590	3.37e-17	2.12e-14	1	JASPAR2018_CORE_vertebrates_non-redundant.meme	MA0052.3	http://jaspar2018.genereg.net/matrix/MA0052.3
107	0	32	JASPAR2018_CORE_vertebrates_non-redundant.meme	MA0073.1	RREB1	CCCCMAAMCAMCCMCMMMCV	20	299	3.43e-17	2.15e-14	1	JASPAR2018_CORE_vertebrates_non-redundant.meme	MA0073.1	http://jaspar2018.genereg.net/matrix/MA0073.1
108	1	37	JASPAR2018_CORE_vertebrates_non-redundant.meme	MA0100.3	MYB	NNCAACTGHH	10	1312	2.39e-16	1.5e-13	1	JASPAR2018_CORE_vertebrates_non-redundant.meme	MA0100.3	http://jaspar2018.genereg.net/matrix/MA0100.3
109	0	18	JASPAR2018_CORE_vertebrates_non-redundant.meme	MA0258.2	ESR2	AGGTCASVNTGMCCY	15	929	2.84e-16	1.78e-13	1	JASPAR2018_CORE_vertebrates_non-redundant.meme	MA0258.2	http://jaspar2018.genereg.net/matrix/MA0258.2
110	0	16	JASPAR2018_CORE_vertebrates_non-redundant.meme	MA0519.1	Stat5a::Stat5b	DTTTCCMAGAA	11	281	2.86e-16	1.79e-13	1	JASPAR2018_CORE_vertebrates_non-redundant.meme	MA0519.1	http://jaspar2018.genereg.net/matrix/MA0519.1
111	1	38	JASPAR2018_CORE_vertebrates_non-redundant.meme	MA0513.1	SMAD2::SMAD3::SMAD4	CTGTCTGDCACCT	13	219	3.12e-16	1.96e-13	1	JASPAR2018_CORE_vertebrates_non-redundant.meme	MA0513.1	http://jaspar2018.genereg.net/matrix/MA0513.1
112	1	39	JASPAR2018_CORE_vertebrates_non-redundant.meme	MA0845.1	FOXB1	WATGTAAATAT	11	755	3.51e-16	2.2e-13	1	JASPAR2018_CORE_vertebrates_non-redundant.meme	MA0845.1	http://jaspar2018.genereg.net/matrix/MA0845.1
113	0	35	JASPAR2018_CORE_vertebrates_non-redundant.meme	MA0062.2	Gabpa	CCGGAAGTGVV	11	1356	9.21e-16	5.78e-13	1	JASPAR2018_CORE_vertebrates_non-redundant.meme	MA0062.2	http://jaspar2018.genereg.net/matrix/MA0062.2
114	0	21	JASPAR2018_CORE_vertebrates_non-redundant.meme	MA1132.1	JUN::JUNB	KATGACKCAT	10	650	2.47e-15	1.55e-12	1	JASPAR2018_CORE_vertebrates_non-redundant.meme	MA1132.1	http://jaspar2018.genereg.net/matrix/MA1132.1
115	0	33	JASPAR2018_CORE_vertebrates_non-redundant.meme	MA0259.1	ARNT::HIF1A	VBACGTGC	8	1316	4.7e-15	2.95e-12	1	JASPAR2018_CORE_vertebrates_non-redundant.meme	MA0259.1	http://jaspar2018.genereg.net/matrix/MA0259.1
116	1	40	JASPAR2018_CORE_vertebrates_non-redundant.meme	MA0153.2	HNF1B	GTTAATNATTAAY	13	925	5.28e-15	3.31e-12	1	JASPAR2018_CORE_vertebrates_non-redundant.meme	MA0153.2	http://jaspar2018.genereg.net/matrix/MA0153.2
117	0	16	JASPAR2018_CORE_vertebrates_non-redundant.meme	MA0463.1	Bcl6	DTTCCTRGAAAGCH	14	1240	6.26e-15	3.93e-12	1	JASPAR2018_CORE_vertebrates_non-redundant.meme	MA0463.1	http://jaspar2018.genereg.net/matrix/MA0463.1
118	0	17	JASPAR2018_CORE_vertebrates_non-redundant.meme	MA1125.1	ZNF384	DNWMAAAAAAAA	12	217	7.82e-15	4.91e-12	1	JASPAR2018_CORE_vertebrates_non-redundant.meme	MA1125.1	http://jaspar2018.genereg.net/matrix/MA1125.1
119	0	39	JASPAR2018_CORE_vertebrates_non-redundant.meme	MA0851.1	Foxj3	NDAADGTAAACAAANNM	17	754	1.26e-14	7.92e-12	1	JASPAR2018_CORE_vertebrates_non-redundant.meme	MA0851.1	http://jaspar2018.genereg.net/matrix/MA0851.1
120	1	41	JASPAR2018_CORE_vertebrates_non-redundant.meme	MA0768.1	LEF1	AAAGATCAAAGGRWW	15	1167	2.09e-14	1.31e-11	1	JASPAR2018_CORE_vertebrates_non-redundant.meme	MA0768.1	http://jaspar2018.genereg.net/matrix/MA0768.1
121	0	32	JASPAR2018_CORE_vertebrates_non-redundant.meme	MA0516.1	SP2	GYCCCGCCYCYBSSS	15	384	2.31e-14	1.45e-11	1	JASPAR2018_CORE_vertebrates_non-redundant.meme	MA0516.1	http://jaspar2018.genereg.net/matrix/MA0516.1
122	0	21	JASPAR2018_CORE_vertebrates_non-redundant.meme	MA0067.1	Pax2	NGTCAYKB	8	1295	5.63e-14	3.53e-11	1	JASPAR2018_CORE_vertebrates_non-redundant.meme	MA0067.1	http://jaspar2018.genereg.net/matrix/MA0067.1
123	0	26	JASPAR2018_CORE_vertebrates_non-redundant.meme	MA0488.1	JUN	DDRATGATGTCAT	13	438	5.82e-14	3.65e-11	1	JASPAR2018_CORE_vertebrates_non-redundant.meme	MA0488.1	http://jaspar2018.genereg.net/matrix/MA0488.1
124	0	26	JASPAR2018_CORE_vertebrates_non-redundant.meme	MA1129.1	FOSL1::JUN(var.2)	ATGACGTCAT	10	1383	2.78e-13	1.74e-10	1	JASPAR2018_CORE_vertebrates_non-redundant.meme	MA1129.1	http://jaspar2018.genereg.net/matrix/MA1129.1
125	0	36	JASPAR2018_CORE_vertebrates_non-redundant.meme	MA0773.1	MEF2D	DCTAWAAATAGM	12	772	5.77e-13	3.62e-10	1	JASPAR2018_CORE_vertebrates_non-redundant.meme	MA0773.1	http://jaspar2018.genereg.net/matrix/MA0773.1
126	1	42	JASPAR2018_CORE_vertebrates_non-redundant.meme	MA0509.1	Rfx1	GTYNCCATGGCAAC	14	1088	6.27e-13	3.93e-10	1	JASPAR2018_CORE_vertebrates_non-redundant.meme	MA0509.1	http://jaspar2018.genereg.net/matrix/MA0509.1
127	0	32	JASPAR2018_CORE_vertebrates_non-redundant.meme	MA0079.3	SP1	GCCCCKCCCCC	11	547	6.85e-13	4.29e-10	1	JASPAR2018_CORE_vertebrates_non-redundant.meme	MA0079.3	http://jaspar2018.genereg.net/matrix/MA0079.3
128	0	40	JASPAR2018_CORE_vertebrates_non-redundant.meme	MA0046.2	HNF1A	DRTTAATNATTAACN	15	1202	8.72e-13	5.46e-10	1	JASPAR2018_CORE_vertebrates_non-redundant.meme	MA0046.2	http://jaspar2018.genereg.net/matrix/MA0046.2
129	0	26	JASPAR2018_CORE_vertebrates_non-redundant.meme	MA0492.1	JUND(var.2)	DDDRATGABGTCATN	15	475	1.94e-12	1.21e-09	1	JASPAR2018_CORE_vertebrates_non-redundant.meme	MA0492.1	http://jaspar2018.genereg.net/matrix/MA0492.1
130	1	43	JASPAR2018_CORE_vertebrates_non-redundant.meme	MA1107.1	KLF9	VSCCACACCCACH	13	501	3.94e-12	2.47e-09	1	JASPAR2018_CORE_vertebrates_non-redundant.meme	MA1107.1	http://jaspar2018.genereg.net/matrix/MA1107.1
131	0	22	JASPAR2018_CORE_vertebrates_non-redundant.meme	MA0778.1	NFKB2	AGGGGAWTCCCCY	13	737	5.88e-12	3.69e-09	1	JASPAR2018_CORE_vertebrates_non-redundant.meme	MA0778.1	http://jaspar2018.genereg.net/matrix/MA0778.1
132	0	21	JASPAR2018_CORE_vertebrates_non-redundant.meme	MA1114.1	PBX3	NNNTGAGTGACAGGBNN	17	1099	8.45e-12	5.3e-09	1	JASPAR2018_CORE_vertebrates_non-redundant.meme	MA1114.1	http://jaspar2018.genereg.net/matrix/MA1114.1
133	0	35	JASPAR2018_CORE_vertebrates_non-redundant.meme	MA0136.2	ELF5	AMSMGGAAGTD	11	1294	1.61e-11	1.01e-08	1	JASPAR2018_CORE_vertebrates_non-redundant.meme	MA0136.2	http://jaspar2018.genereg.net/matrix/MA0136.2
134	0	26	JASPAR2018_CORE_vertebrates_non-redundant.meme	MA1127.1	FOSB::JUN	GATGACGTCAT	11	556	1.66e-11	1.04e-08	1	JASPAR2018_CORE_vertebrates_non-redundant.meme	MA1127.1	http://jaspar2018.genereg.net/matrix/MA1127.1
135	0	18	JASPAR2018_CORE_vertebrates_non-redundant.meme	MA0014.3	PAX5	RRGCGTGACCNN	12	1116	2.59e-11	1.63e-08	1	JASPAR2018_CORE_vertebrates_non-redundant.meme	MA0014.3	http://jaspar2018.genereg.net/matrix/MA0014.3
136	0	21	JASPAR2018_CORE_vertebrates_non-redundant.meme	MA0841.1	NFE2	VATGACTCATS	11	353	1.56e-10	9.8e-08	1	JASPAR2018_CORE_vertebrates_non-redundant.meme	MA0841.1	http://jaspar2018.genereg.net/matrix/MA0841.1
137	1	44	JASPAR2018_CORE_vertebrates_non-redundant.meme	MA0601.1	Arid3b	ATATTAATWAN	11	655	5.45e-10	3.41e-07	1	JASPAR2018_CORE_vertebrates_non-redundant.meme	MA0601.1	http://jaspar2018.genereg.net/matrix/MA0601.1
138	0	35	JASPAR2018_CORE_vertebrates_non-redundant.meme	MA0762.1	ETV2	AACCGGAAATR	11	1375	5.87e-10	3.68e-07	1	JASPAR2018_CORE_vertebrates_non-redundant.meme	MA0762.1	http://jaspar2018.genereg.net/matrix/MA0762.1
139	0	26	JASPAR2018_CORE_vertebrates_non-redundant.meme	MA0834.1	ATF7	NDATGACGTCATMV	14	580	6.93e-10	4.35e-07	1	JASPAR2018_CORE_vertebrates_non-redundant.meme	MA0834.1	http://jaspar2018.genereg.net/matrix/MA0834.1
140	1	45	JASPAR2018_CORE_vertebrates_non-redundant.meme	MA0155.1	INSM1	TGYCWGGGGGCR	12	1042	1.03e-09	6.46e-07	1	JASPAR2018_CORE_vertebrates_non-redundant.meme	MA0155.1	http://jaspar2018.genereg.net/matrix/MA0155.1
141	0	19	JASPAR2018_CORE_vertebrates_non-redundant.meme	MA0154.3	EBF1	ATTCCCHWGGGAMT	14	950	2.53e-09	1.59e-06	1	JASPAR2018_CORE_vertebrates_non-redundant.meme	MA0154.3	http://jaspar2018.genereg.net/matrix/MA0154.3
142	1	46	JASPAR2018_CORE_vertebrates_non-redundant.meme	MA0006.1	Ahr::Arnt	YGCGTG	6	1360	2.98e-09	1.87e-06	1	JASPAR2018_CORE_vertebrates_non-redundant.meme	MA0006.1	http://jaspar2018.genereg.net/matrix/MA0006.1
143	0	26	JASPAR2018_CORE_vertebrates_non-redundant.meme	MA1139.1	FOSL2::JUNB(var.2)	DATGACGTCATH	12	750	3.34e-09	2.09e-06	1	JASPAR2018_CORE_vertebrates_non-redundant.meme	MA1139.1	http://jaspar2018.genereg.net/matrix/MA1139.1
144	0	37	JASPAR2018_CORE_vertebrates_non-redundant.meme	MA0816.1	Ascl2	ARCAGCTGCY	10	1113	9.25e-09	5.8e-06	1	JASPAR2018_CORE_vertebrates_non-redundant.meme	MA0816.1	http://jaspar2018.genereg.net/matrix/MA0816.1
145	0	32	JASPAR2018_CORE_vertebrates_non-redundant.meme	MA0599.1	KLF5	GCCCCDCCCH	10	209	1.31e-08	8.21e-06	1	JASPAR2018_CORE_vertebrates_non-redundant.meme	MA0599.1	http://jaspar2018.genereg.net/matrix/MA0599.1
146	1	47	JASPAR2018_CORE_vertebrates_non-redundant.meme	MA0041.1	Foxd3	GWWTGTTTDTTT	12	546	2.18e-08	1.37e-05	1	JASPAR2018_CORE_vertebrates_non-redundant.meme	MA0041.1	http://jaspar2018.genereg.net/matrix/MA0041.1
147	0	45	JASPAR2018_CORE_vertebrates_non-redundant.meme	MA1102.1	CTCFL	CRSCAGGGGGCRSB	14	759	2.4e-08	1.5e-05	1	JASPAR2018_CORE_vertebrates_non-redundant.meme	MA1102.1	http://jaspar2018.genereg.net/matrix/MA1102.1
148	0	36	JASPAR2018_CORE_vertebrates_non-redundant.meme	MA0660.1	MEF2B	RCTAWAAATAGC	12	536	2.88e-08	1.8e-05	1	JASPAR2018_CORE_vertebrates_non-redundant.meme	MA0660.1	http://jaspar2018.genereg.net/matrix/MA0660.1
149	1	48	JASPAR2018_CORE_vertebrates_non-redundant.meme	MA0143.3	Sox2	CCWTTGTY	8	89	3.16e-08	1.98e-05	1	JASPAR2018_CORE_vertebrates_non-redundant.meme	MA0143.3	http://jaspar2018.genereg.net/matrix/MA0143.3
150	0	26	JASPAR2018_CORE_vertebrates_non-redundant.meme	MA1145.1	FOSL2::JUND(var.2)	NNRTGACGTCAYHSN	15	194	3.47e-08	2.18e-05	1	JASPAR2018_CORE_vertebrates_non-redundant.meme	MA1145.1	http://jaspar2018.genereg.net/matrix/MA1145.1
151	0	21	JASPAR2018_CORE_vertebrates_non-redundant.meme	MA0638.1	CREB3	VTGCCACGTCAYCR	14	1077	3.78e-08	2.37e-05	1	JASPAR2018_CORE_vertebrates_non-redundant.meme	MA0638.1	http://jaspar2018.genereg.net/matrix/MA0638.1
152	1	49	JASPAR2018_CORE_vertebrates_non-redundant.meme	MA0149.1	EWSR1-FLI1	GGAAGGAAGGAAGGAAGG	18	75	8.93e-08	5.6e-05	1	JASPAR2018_CORE_vertebrates_non-redundant.meme	MA0149.1	http://jaspar2018.genereg.net/matrix/MA0149.1
153	1	50	JASPAR2018_CORE_vertebrates_non-redundant.meme	MA0736.1	GLIS2	GACCCCCCGCRAMG	14	1127	9.04e-08	5.67e-05	1	JASPAR2018_CORE_vertebrates_non-redundant.meme	MA0736.1	http://jaspar2018.genereg.net/matrix/MA0736.1
154	0	39	JASPAR2018_CORE_vertebrates_non-redundant.meme	MA0846.1	FOXC2	WAWGTAAACAWW	12	85	1.66e-07	0.000104	1	JASPAR2018_CORE_vertebrates_non-redundant.meme	MA0846.1	http://jaspar2018.genereg.net/matrix/MA0846.1
155	0	33	JASPAR2018_CORE_vertebrates_non-redundant.meme	MA0104.4	MYCN	VVCCACGTGGBB	12	176	2.21e-07	0.000138	1	JASPAR2018_CORE_vertebrates_non-redundant.meme	MA0104.4	http://jaspar2018.genereg.net/matrix/MA0104.4
156	0	26	JASPAR2018_CORE_vertebrates_non-redundant.meme	MA1140.1	JUNB(var.2)	RTGACGTCAY	10	1197	2.22e-07	0.000139	1	JASPAR2018_CORE_vertebrates_non-redundant.meme	MA1140.1	http://jaspar2018.genereg.net/matrix/MA1140.1
157	1	51	JASPAR2018_CORE_vertebrates_non-redundant.meme	MA0019.1	Ddit3::Cebpa	VNRTGCAATMCC	12	1171	3.09e-07	0.000194	1	JASPAR2018_CORE_vertebrates_non-redundant.meme	MA0019.1	http://jaspar2018.genereg.net/matrix/MA0019.1
158	0	18	JASPAR2018_CORE_vertebrates_non-redundant.meme	MA0693.2	VDR	YRRGTTCA	8	1259	3.79e-07	0.000238	1	JASPAR2018_CORE_vertebrates_non-redundant.meme	MA0693.2	http://jaspar2018.genereg.net/matrix/MA0693.2
159	0	21	JASPAR2018_CORE_vertebrates_non-redundant.meme	MA1126.1	FOS::JUN(var.2)	DRTGACGTCATHNDTN	16	1328	5.23e-07	0.000328	1	JASPAR2018_CORE_vertebrates_non-redundant.meme	MA1126.1	http://jaspar2018.genereg.net/matrix/MA1126.1
160	1	52	JASPAR2018_CORE_vertebrates_non-redundant.meme	MA0161.2	NFIC	NNCTTGGCANN	11	1066	5.56e-07	0.000349	1	JASPAR2018_CORE_vertebrates_non-redundant.meme	MA0161.2	http://jaspar2018.genereg.net/matrix/MA0161.2
161	0	33	JASPAR2018_CORE_vertebrates_non-redundant.meme	MA0649.1	HEY2	GRCACGTGYC	10	1314	5.68e-07	0.000356	1	JASPAR2018_CORE_vertebrates_non-redundant.meme	MA0649.1	http://jaspar2018.genereg.net/matrix/MA0649.1
162	1	53	JASPAR2018_CORE_vertebrates_non-redundant.meme	MA0095.2	YY1	CAARATGGCBGC	12	1174	6.46e-07	0.000405	1	JASPAR2018_CORE_vertebrates_non-redundant.meme	MA0095.2	http://jaspar2018.genereg.net/matrix/MA0095.2
163	0	39	JASPAR2018_CORE_vertebrates_non-redundant.meme	MA0030.1	FOXF2	BNAASGTAAACAAD	14	944	1.18e-06	0.000741	1	JASPAR2018_CORE_vertebrates_non-redundant.meme	MA0030.1	http://jaspar2018.genereg.net/matrix/MA0030.1
164	0	7	JASPAR2018_CORE_vertebrates_non-redundant.meme	MA0676.1	Nr2e1	AAAAGTCAA	9	1491	1.28e-06	0.000804	1	JASPAR2018_CORE_vertebrates_non-redundant.meme	MA0676.1	http://jaspar2018.genereg.net/matrix/MA0676.1
165	1	54	JASPAR2018_CORE_vertebrates_non-redundant.meme	MA0056.1	MZF1	BGGGGA	6	464	1.5e-06	0.000938	1	JASPAR2018_CORE_vertebrates_non-redundant.meme	MA0056.1	http://jaspar2018.genereg.net/matrix/MA0056.1
166	0	35	JASPAR2018_CORE_vertebrates_non-redundant.meme	MA0598.2	EHF	WACCCGGAAGTA	12	1399	1.63e-06	0.00102	1	JASPAR2018_CORE_vertebrates_non-redundant.meme	MA0598.2	http://jaspar2018.genereg.net/matrix/MA0598.2
167	1	55	JASPAR2018_CORE_vertebrates_non-redundant.meme	MA0715.1	PROP1	TAATYWAATTA	11	353	2.72e-06	0.00171	1	JASPAR2018_CORE_vertebrates_non-redundant.meme	MA0715.1	http://jaspar2018.genereg.net/matrix/MA0715.1
168	0	39	JASPAR2018_CORE_vertebrates_non-redundant.meme	MA0033.2	FOXL1	RTAAACA	7	1196	3.55e-06	0.00222	1	JASPAR2018_CORE_vertebrates_non-redundant.meme	MA0033.2	http://jaspar2018.genereg.net/matrix/MA0033.2
169	0	50	JASPAR2018_CORE_vertebrates_non-redundant.meme	MA0737.1	GLIS3	GACCCCCCACGAAG	14	685	4.22e-06	0.00265	1	JASPAR2018_CORE_vertebrates_non-redundant.meme	MA0737.1	http://jaspar2018.genereg.net/matrix/MA0737.1
170	0	21	JASPAR2018_CORE_vertebrates_non-redundant.meme	MA0495.2	MAFF	DWWTTGCTGAGTCAGCAAWWW	21	827	4.31e-06	0.0027	1	JASPAR2018_CORE_vertebrates_non-redundant.meme	MA0495.2	http://jaspar2018.genereg.net/matrix/MA0495.2
171	1	56	JASPAR2018_CORE_vertebrates_non-redundant.meme	MA0757.1	ONECUT3	AAAAAATCRATAAH	14	740	4.46e-06	0.0028	1	JASPAR2018_CORE_vertebrates_non-redundant.meme	MA0757.1	http://jaspar2018.genereg.net/matrix/MA0757.1
172	0	47	JASPAR2018_CORE_vertebrates_non-redundant.meme	MA0040.1	Foxq1	HATTGTTTATW	11	495	4.49e-06	0.00281	1	JASPAR2018_CORE_vertebrates_non-redundant.meme	MA0040.1	http://jaspar2018.genereg.net/matrix/MA0040.1
173	0	39	JASPAR2018_CORE_vertebrates_non-redundant.meme	MA0032.2	FOXC1	WAWGTAAAYAW	11	244	5.75e-06	0.0036	1	JASPAR2018_CORE_vertebrates_non-redundant.meme	MA0032.2	http://jaspar2018.genereg.net/matrix/MA0032.2
174	1	57	JASPAR2018_CORE_vertebrates_non-redundant.meme	MA0784.1	POU1F1	AWTATGCWAATKAG	14	366	9.11e-06	0.00571	1	JASPAR2018_CORE_vertebrates_non-redundant.meme	MA0784.1	http://jaspar2018.genereg.net/matrix/MA0784.1
175	0	43	JASPAR2018_CORE_vertebrates_non-redundant.meme	MA0746.1	SP3	VCCACGCCCMC	11	95	9.34e-06	0.00585	1	JASPAR2018_CORE_vertebrates_non-redundant.meme	MA0746.1	http://jaspar2018.genereg.net/matrix/MA0746.1
176	0	33	JASPAR2018_CORE_vertebrates_non-redundant.meme	MA1108.1	MXI1	NVVCCACGTGSNB	13	94	1.3e-05	0.00815	1	JASPAR2018_CORE_vertebrates_non-redundant.meme	MA1108.1	http://jaspar2018.genereg.net/matrix/MA1108.1
177	0	57	JASPAR2018_CORE_vertebrates_non-redundant.meme	MA0788.1	POU3F3	WWTATGCWAATTW	13	1376	1.31e-05	0.00821	1	JASPAR2018_CORE_vertebrates_non-redundant.meme	MA0788.1	http://jaspar2018.genereg.net/matrix/MA0788.1
178	0	36	JASPAR2018_CORE_vertebrates_non-redundant.meme	MA0497.1	MEF2C	DDDCYAAAAATAGMW	15	237	1.61e-05	0.0101	1	JASPAR2018_CORE_vertebrates_non-redundant.meme	MA0497.1	http://jaspar2018.genereg.net/matrix/MA0497.1
179	0	37	JASPAR2018_CORE_vertebrates_non-redundant.meme	MA1100.1	ASCL1	VSAGCAGCTGSNN	13	895	1.72e-05	0.0108	1	JASPAR2018_CORE_vertebrates_non-redundant.meme	MA1100.1	http://jaspar2018.genereg.net/matrix/MA1100.1
180	0	26	JASPAR2018_CORE_vertebrates_non-redundant.meme	MA0656.1	JDP2(var.2)	GATGACGTCAYC	12	353	1.95e-05	0.0122	1	JASPAR2018_CORE_vertebrates_non-redundant.meme	MA0656.1	http://jaspar2018.genereg.net/matrix/MA0656.1
181	0	39	JASPAR2018_CORE_vertebrates_non-redundant.meme	MA0786.1	POU3F1	WTATGCWAATKW	12	1294	2.31e-05	0.0145	1	JASPAR2018_CORE_vertebrates_non-redundant.meme	MA0786.1	http://jaspar2018.genereg.net/matrix/MA0786.1
182	1	58	JASPAR2018_CORE_vertebrates_non-redundant.meme	MA0483.1	Gfi1b	AAATCWCWGCH	11	69	2.5e-05	0.0157	1	JASPAR2018_CORE_vertebrates_non-redundant.meme	MA0483.1	http://jaspar2018.genereg.net/matrix/MA0483.1
183	0	47	JASPAR2018_CORE_vertebrates_non-redundant.meme	MA0084.1	SRY	NWWAACAAT	9	596	2.6e-05	0.0163	1	JASPAR2018_CORE_vertebrates_non-redundant.meme	MA0084.1	http://jaspar2018.genereg.net/matrix/MA0084.1
184	0	35	JASPAR2018_CORE_vertebrates_non-redundant.meme	MA0645.1	ETV6	MSCGGAAGTR	10	1506	4.31e-05	0.027	1	JASPAR2018_CORE_vertebrates_non-redundant.meme	MA0645.1	http://jaspar2018.genereg.net/matrix/MA0645.1
185	0	39	JASPAR2018_CORE_vertebrates_non-redundant.meme	MA0047.2	Foxa2	TGTTTACWYWGB	12	1198	4.85e-05	0.0304	1	JASPAR2018_CORE_vertebrates_non-redundant.meme	MA0047.2	http://jaspar2018.genereg.net/matrix/MA0047.2
186	1	59	JASPAR2018_CORE_vertebrates_non-redundant.meme	MA0506.1	NRF1	GCGCVTGCGCR	11	31	5.29e-05	0.0332	1	JASPAR2018_CORE_vertebrates_non-redundant.meme	MA0506.1	http://jaspar2018.genereg.net/matrix/MA0506.1
187	0	44	JASPAR2018_CORE_vertebrates_non-redundant.meme	MA0910.1	Hoxd8	TAADTAATTAATRGCTN	17	416	6.02e-05	0.0377	1	JASPAR2018_CORE_vertebrates_non-redundant.meme	MA0910.1	http://jaspar2018.genereg.net/matrix/MA0910.1

## Sheet: IFNG-inducible POL2RA
RANK	SEED_MOTIF	CLUSTER	SOURCE	ID	ALT_ID	CONSENSUS	WIDTH	SITES	SEA_PVALUE	EVALUE	EVALUE_ACC	SIM_SOURCE	SIM_MOTIF	MOTIF_URL
1	1	1	MEME	TCTTWGCGACCCCATGGACT	MEME-10	TCTTWGCGACCCCATGGACT	20	151	6.8e-112	2.2e-17	1	MEME	TCTTWGCGACCCCATGGACT
2	1	2	STREME	2-CACTCCAGTAYTCTTGCCT	STREME-2	CACTCCAGTAYTCTTGCCT	19	314	1.26e-107	1.86e-14	1	STREME	2-CACTCCAGTAYTCTTGCCT
3	0	1	STREME	4-ACCCCATGGACTGYA	STREME-4	ACCCCATGGACTGYA	15	318	3.44e-106	7.69e-12	1	JASPAR2018_CORE_vertebrates_non-redundant.meme	MA0138.2 (REST)	http://jaspar2018.genereg.net/matrix/MA0138.2
4	1	3	MEME	CAGTCGTGTCCGACTCTTTG	MEME-1	CAGTCGTGTCCGACTCTTTG	20	254	5.65e-104	7.7e-50	1	MEME	CAGTCGTGTCCGACTCTTTG
5	0	2	MEME	TCCAGGCAAGAAYACTGGAG	MEME-2	TCCAGGCAAGAAYACTGGAG	20	250	1.66e-100	1.7e-49	1	MEME	TCCAGGCAAGAAYACTGGAG
6	1	4	MEME	TCCATGGGATTTTCCAGGCA	MEME-7	TCCATGGGATTTTCCAGGCA	20	159	3.19e-99	5.5e-19	1	JASPAR2018_CORE_vertebrates_non-redundant.meme	MA0107.1 (RELA)	http://jaspar2018.genereg.net/matrix/MA0107.1
7	0	3	STREME	1-AGTCGTGTCCGACTCTTTG	STREME-1	AGTCGTGTCCGACTCTTTG	19	315	3.02e-98	1.86e-14	1	STREME	1-AGTCGTGTCCGACTCTTTG
8	1	5	MEME	GYAGCCYACCAGGCTCCTCY	MEME-3	GYAGCCYACCAGGCTCCTCY	20	313	3.87e-98	1.5e-45	1	MEME	GYAGCCYACCAGGCTCCTCY
9	1	6	MEME	TGGGTTGCCATTTCCTTCTC	MEME-4	TGGGTTGCCATTTCCTTCTC	20	256	3.43e-97	2.1e-36	1	JASPAR2018_CORE_vertebrates_non-redundant.meme	MA0517.1 (STAT1::STAT2)	http://jaspar2018.genereg.net/matrix/MA0517.1
10	0	5	STREME	6-CAGGCTCCYCYGTCCMT	STREME-6	CAGGCTCCYCYGTCCMT	17	251	3.48e-96	1.03e-07	1	STREME	6-CAGGCTCCYCYGTCCMT
11	0	3	MEME	GTYGGACACGACTGAGCGAC	MEME-18	GTYGGACACGACTGAGCGAC	20	107	1.96e-93	0.0076	1	MEME	GTYGGACACGACTGAGCGAC
12	0	1	MEME	GGCTGCMGTCYATGGGGTCR	MEME-15	GGCTGCMGTCYATGGGGTCR	20	120	3.35e-90	0.031	1	JASPAR2018_CORE_vertebrates_non-redundant.meme	MA0138.2 (REST)	http://jaspar2018.genereg.net/matrix/MA0138.2
13	0	6	STREME	3-GTTGCCATTTCCTTCTCCAR	STREME-3	GTTGCCATTTCCTTCTCCAR	20	286	2.17e-84	1.1e-12	1	JASPAR2018_CORE_vertebrates_non-redundant.meme	MA1418.1 (IRF3)	http://jaspar2018.genereg.net/matrix/MA1418.1
14	0	2	MEME	ARTACTGGAGTGGGKTGCCA	MEME-8	ARTACTGGAGTGGGKTGCCA	20	125	1.12e-79	4.2e-17	1	MEME	ARTACTGGAGTGGGKTGCCA
15	0	5	STREME	13-AGGAGCCTGGTRGGC	STREME-13	13-AGGAGCCTGGTRGGC	15	120	1.33e-75	7.81e-05	1	STREME	13-AGGAGCCTGGTRGGC
16	0	8	JASPAR2018_CORE_vertebrates_non-redundant.meme	MA0050.2	IRF1	NTTYASTTTCACTTTCDBTTT	21	282	3.64e-75	2.25e-72	1	JASPAR2018_CORE_vertebrates_non-redundant.meme	MA0050.2	http://jaspar2018.genereg.net/matrix/MA0050.2
17	1	7	MEME	GGTTCGATCCCTGGGTYGGG	MEME-5	GGTTCGATCCCTGGGTYGGG	20	224	9.28e-73	2.4e-24	1	MEME	GGTTCGATCCCTGGGTYGGG
18	0	7	STREME	5-CCAGGGATCRAACC	STREME-5	CCAGGGATCRAACC	14	230	8.9e-66	9.95e-08	1	STREME	5-CCAGGGATCRAACC
19	1	8	STREME	7-AAGTGAAAGTGAARKY	STREME-7	AAGTGAAAGTGAARKY	16	230	1.19e-65	2.25e-07	1	JASPAR2018_CORE_vertebrates_non-redundant.meme	MA0050.2 (IRF1)	http://jaspar2018.genereg.net/matrix/MA0050.2
20	1	9	STREME	8-AAAGAATCYGCCTGCAA	STREME-8	AAAGAATCYGCCTGCAA	17	192	1.37e-57	2.25e-07	1	STREME	8-AAAGAATCYGCCTGCAA
21	1	10	STREME	14-AGCGACTTAGC	STREME-14	14-AGCGACTTAGC	11	225	6.94e-56	7.83e-05	1	STREME	14-AGCGACTTAGC
22	0	9	MEME	KGCAGGCRGATTCTTTACCA	MEME-11	KGCAGGCRGATTCTTTACCA	20	243	3.48e-55	4.4e-12	1	MEME	KGCAGGCRGATTCTTTACCA
23	1	11	STREME	10-CCCTGGTGGCTCAGHKGKT	STREME-10	10-CCCTGGTGGCTCAGHKGKT	19	203	1.88e-54	4.2e-06	1	JASPAR2018_CORE_vertebrates_non-redundant.meme	MA0496.2 (MAFK)	http://jaspar2018.genereg.net/matrix/MA0496.2
24	1	12	STREME	15-TAAAAAAAAAAAAAAAAAAA	STREME-15	15-TAAAAAAAAAAAAAAAAAAA	20	268	5.46e-54	0.000724	1	JASPAR2018_CORE_vertebrates_non-redundant.meme	MA1125.1 (ZNF384)	http://jaspar2018.genereg.net/matrix/MA1125.1
25	0	8	MEME	AAAGTGAAAGTRAAR	MEME-6	AAAGTGAAAGTRAAR	15	439	5.98e-54	1.7e-21	1	JASPAR2018_CORE_vertebrates_non-redundant.meme	MA0050.2 (IRF1)	http://jaspar2018.genereg.net/matrix/MA0050.2
26	0	11	MEME	CTGAGCCACCAGGGAAGYCC	MEME-9	CTGAGCCACCAGGGAAGYCC	20	136	3.65e-53	1.3e-18	1	MEME	CTGAGCCACCAGGGAAGYCC
27	1	13	MEME	TYCCTTCTCCAGGGGATCTT	MEME-17	TYCCTTCTCCAGGGGATCTT	20	107	2.78e-48	0.00014	1	MEME	TYCCTTCTCCAGGGGATCTT
28	0	4	STREME	9-GGAARATCCC	STREME-9	GGAARATCCC	10	252	7.59e-46	2.56e-07	1	JASPAR2018_CORE_vertebrates_non-redundant.meme	MA0107.1 (RELA)	http://jaspar2018.genereg.net/matrix/MA0107.1
29	0	8	JASPAR2018_CORE_vertebrates_non-redundant.meme	MA0051.1	IRF2	SGAAAGYGAAASCRWWWM	18	229	1.23e-44	7.59e-42	1	JASPAR2018_CORE_vertebrates_non-redundant.meme	MA0051.1	http://jaspar2018.genereg.net/matrix/MA0051.1
30	0	8	JASPAR2018_CORE_vertebrates_non-redundant.meme	MA1418.1	IRF3	NSRRAAMGGAAACCGAAACYR	21	207	1.08e-43	6.65e-41	1	JASPAR2018_CORE_vertebrates_non-redundant.meme	MA1418.1	http://jaspar2018.genereg.net/matrix/MA1418.1
31	1	14	STREME	12-ACACACACAYACAYACAY	STREME-12	12-ACACACACAYACAYACAY	18	156	2.2e-33	6.41e-05	1	STREME	12-ACACACACAYACAYACAY
32	1	15	STREME	16-AGCAGCAGCAGC	STREME-16	16-AGCAGCAGCAGC	12	150	7.4e-33	0.0343	1	JASPAR2018_CORE_vertebrates_non-redundant.meme	MA1100.1 (ASCL1)	http://jaspar2018.genereg.net/matrix/MA1100.1
33	0	8	JASPAR2018_CORE_vertebrates_non-redundant.meme	MA0517.1	STAT1::STAT2	THAGTTTCRKTTTCY	15	416	1.22e-31	7.51e-29	1	JASPAR2018_CORE_vertebrates_non-redundant.meme	MA0517.1	http://jaspar2018.genereg.net/matrix/MA0517.1
34	0	8	STREME	18-TGCATGAAAGTGAA	STREME-18	18-TGCATGAAAGTGAA	14	110	1.26e-31	0.0792	1	JASPAR2018_CORE_vertebrates_non-redundant.meme	MA0508.2 (PRDM1)	http://jaspar2018.genereg.net/matrix/MA0508.2
35	0	8	JASPAR2018_CORE_vertebrates_non-redundant.meme	MA0508.2	PRDM1	TCACTTTCWC	10	140	3.43e-31	2.12e-28	1	JASPAR2018_CORE_vertebrates_non-redundant.meme	MA0508.2	http://jaspar2018.genereg.net/matrix/MA0508.2
36	1	16	JASPAR2018_CORE_vertebrates_non-redundant.meme	MA0652.1	IRF8	HCGAAACCGAAACT	14	141	9.14e-31	5.64e-28	1	JASPAR2018_CORE_vertebrates_non-redundant.meme	MA0652.1	http://jaspar2018.genereg.net/matrix/MA0652.1
37	0	8	JASPAR2018_CORE_vertebrates_non-redundant.meme	MA0653.1	IRF9	AACGAAACCGAAACT	15	189	2.34e-30	1.45e-27	1	JASPAR2018_CORE_vertebrates_non-redundant.meme	MA0653.1	http://jaspar2018.genereg.net/matrix/MA0653.1
38	0	12	MEME	AAAADAAAAAAWAAAAAAAA	MEME-16	AAAADAAAAAAWAAAAAAAA	20	396	5.61e-26	1.5e-05	1	JASPAR2018_CORE_vertebrates_non-redundant.meme	MA1125.1 (ZNF384)	http://jaspar2018.genereg.net/matrix/MA1125.1
39	0	8	JASPAR2018_CORE_vertebrates_non-redundant.meme	MA0772.1	IRF7	HCGAAARYGAAAVT	14	346	1.08e-23	6.64e-21	1	JASPAR2018_CORE_vertebrates_non-redundant.meme	MA0772.1	http://jaspar2018.genereg.net/matrix/MA0772.1
40	0	16	JASPAR2018_CORE_vertebrates_non-redundant.meme	MA1419.1	IRF4	HCGAAACCGAAACYA	15	194	3.44e-19	2.12e-16	1	JASPAR2018_CORE_vertebrates_non-redundant.meme	MA1419.1	http://jaspar2018.genereg.net/matrix/MA1419.1
41	0	12	MEME	WTTTTTTTTTTTTAWTTAW	MEME-12	WTTTTTTTTTTTTAWTTAW	19	275	1.17e-18	1.2e-11	1	JASPAR2018_CORE_vertebrates_non-redundant.meme	MA1125.1 (ZNF384)	http://jaspar2018.genereg.net/matrix/MA1125.1
42	1	17	STREME	17-CCCRCCCCCRCCCC	STREME-17	17-CCCRCCCCCRCCCC	14	165	1.88e-17	0.0387	1	JASPAR2018_CORE_vertebrates_non-redundant.meme	MA0599.1 (KLF5)	http://jaspar2018.genereg.net/matrix/MA0599.1
43	0	17	JASPAR2018_CORE_vertebrates_non-redundant.meme	MA0528.1	ZNF263	GGAGGAGGRRGRGGRGGRRGR	21	213	3.24e-17	2e-14	1	JASPAR2018_CORE_vertebrates_non-redundant.meme	MA0528.1	http://jaspar2018.genereg.net/matrix/MA0528.1
44	1	18	JASPAR2018_CORE_vertebrates_non-redundant.meme	MA0144.2	STAT3	YTTCYKGGAAD	11	248	2.59e-16	1.6e-13	1	JASPAR2018_CORE_vertebrates_non-redundant.meme	MA0144.2	http://jaspar2018.genereg.net/matrix/MA0144.2
45	1	19	STREME	11-GTCTCCTGCA	STREME-11	11-GTCTCCTGCA	10	118	2e-15	2.64e-05	1	STREME	11-GTCTCCTGCA
46	1	20	JASPAR2018_CORE_vertebrates_non-redundant.meme	MA0150.2	Nfe2l2	CASNATGACTCAGCA	15	236	2.11e-15	1.3e-12	1	JASPAR2018_CORE_vertebrates_non-redundant.meme	MA0150.2	http://jaspar2018.genereg.net/matrix/MA0150.2
47	1	21	STREME	19-GATGGCATCACYG	STREME-19	19-GATGGCATCACYG	13	91	9.45e-15	0.0792	1	JASPAR2018_CORE_vertebrates_non-redundant.meme	MA0656.1 (JDP2(var.2))	http://jaspar2018.genereg.net/matrix/MA0656.1
48	0	4	JASPAR2018_CORE_vertebrates_non-redundant.meme	MA0152.1	NFATC2	TTTTCCA	7	134	5.15e-14	3.18e-11	1	JASPAR2018_CORE_vertebrates_non-redundant.meme	MA0152.1	http://jaspar2018.genereg.net/matrix/MA0152.1
49	0	17	MEME	CCWTCWCYMHCTCCC	MEME-14	CCWTCWCYMHCTCCC	15	407	1.7e-12	0.032	1	JASPAR2018_CORE_vertebrates_non-redundant.meme	MA0528.1 (ZNF263)	http://jaspar2018.genereg.net/matrix/MA0528.1
50	0	17	JASPAR2018_CORE_vertebrates_non-redundant.meme	MA0516.1	SP2	GYCCCGCCYCYBSSS	15	99	3.98e-12	2.45e-09	1	JASPAR2018_CORE_vertebrates_non-redundant.meme	MA0516.1	http://jaspar2018.genereg.net/matrix/MA0516.1
51	1	22	JASPAR2018_CORE_vertebrates_non-redundant.meme	MA1149.1	RARA::RXRG	RRGGTCAHNNNRRGGTCA	18	255	8.36e-12	5.16e-09	1	JASPAR2018_CORE_vertebrates_non-redundant.meme	MA1149.1	http://jaspar2018.genereg.net/matrix/MA1149.1
52	0	20	JASPAR2018_CORE_vertebrates_non-redundant.meme	MA0501.1	MAF::NFE2	ATGACTCAGCANWTY	15	229	5.29e-11	3.27e-08	1	JASPAR2018_CORE_vertebrates_non-redundant.meme	MA0501.1	http://jaspar2018.genereg.net/matrix/MA0501.1
53	0	20	JASPAR2018_CORE_vertebrates_non-redundant.meme	MA1142.1	FOSL1::JUND	NRTGACTCAT	10	286	7.67e-11	4.73e-08	1	JASPAR2018_CORE_vertebrates_non-redundant.meme	MA1142.1	http://jaspar2018.genereg.net/matrix/MA1142.1
54	0	20	JASPAR2018_CORE_vertebrates_non-redundant.meme	MA0478.1	FOSL2	KRRTGASTCAB	11	302	2.43e-10	1.5e-07	1	JASPAR2018_CORE_vertebrates_non-redundant.meme	MA0478.1	http://jaspar2018.genereg.net/matrix/MA0478.1
55	0	20	JASPAR2018_CORE_vertebrates_non-redundant.meme	MA1128.1	FOSL1::JUN	NKATGACTCATNN	13	294	1.34e-09	8.29e-07	1	JASPAR2018_CORE_vertebrates_non-redundant.meme	MA1128.1	http://jaspar2018.genereg.net/matrix/MA1128.1
56	0	20	JASPAR2018_CORE_vertebrates_non-redundant.meme	MA1101.1	BACH2	NMTGACTCAGCANH	14	424	1.83e-09	1.13e-06	1	JASPAR2018_CORE_vertebrates_non-redundant.meme	MA1101.1	http://jaspar2018.genereg.net/matrix/MA1101.1
56	0	12	JASPAR2018_CORE_vertebrates_non-redundant.meme	MA1125.1	ZNF384	DNWMAAAAAAAA	12	117	1.83e-09	1.13e-06	1	JASPAR2018_CORE_vertebrates_non-redundant.meme	MA1125.1	http://jaspar2018.genereg.net/matrix/MA1125.1
57	0	20	JASPAR2018_CORE_vertebrates_non-redundant.meme	MA1137.1	FOSL1::JUNB	NDRTGACTCATNN	13	296	2.9e-09	1.79e-06	1	JASPAR2018_CORE_vertebrates_non-redundant.meme	MA1137.1	http://jaspar2018.genereg.net/matrix/MA1137.1
58	0	20	JASPAR2018_CORE_vertebrates_non-redundant.meme	MA0591.1	Bach1::Mafk	RSSATGACTCAGCAB	15	205	3.78e-09	2.33e-06	1	JASPAR2018_CORE_vertebrates_non-redundant.meme	MA0591.1	http://jaspar2018.genereg.net/matrix/MA0591.1
59	0	20	JASPAR2018_CORE_vertebrates_non-redundant.meme	MA1144.1	FOSL2::JUND	KATGACTCAT	10	276	4.58e-09	2.82e-06	1	JASPAR2018_CORE_vertebrates_non-redundant.meme	MA1144.1	http://jaspar2018.genereg.net/matrix/MA1144.1
60	0	20	JASPAR2018_CORE_vertebrates_non-redundant.meme	MA0476.1	FOS	DVTGASTCATB	11	204	8.54e-09	5.27e-06	1	JASPAR2018_CORE_vertebrates_non-redundant.meme	MA0476.1	http://jaspar2018.genereg.net/matrix/MA0476.1
61	0	21	JASPAR2018_CORE_vertebrates_non-redundant.meme	MA0492.1	JUND(var.2)	DDDRATGABGTCATN	15	79	9.36e-09	5.77e-06	1	JASPAR2018_CORE_vertebrates_non-redundant.meme	MA0492.1	http://jaspar2018.genereg.net/matrix/MA0492.1
62	0	21	JASPAR2018_CORE_vertebrates_non-redundant.meme	MA0488.1	JUN	DDRATGATGTCAT	13	86	1.45e-08	8.94e-06	1	JASPAR2018_CORE_vertebrates_non-redundant.meme	MA0488.1	http://jaspar2018.genereg.net/matrix/MA0488.1
63	0	17	JASPAR2018_CORE_vertebrates_non-redundant.meme	MA0073.1	RREB1	CCCCMAAMCAMCCMCMMMCV	20	84	1.79e-08	1.1e-05	1	JASPAR2018_CORE_vertebrates_non-redundant.meme	MA0073.1	http://jaspar2018.genereg.net/matrix/MA0073.1
64	0	20	JASPAR2018_CORE_vertebrates_non-redundant.meme	MA1141.1	FOS::JUND	NKATGAGTCATNN	13	267	2.02e-08	1.25e-05	1	JASPAR2018_CORE_vertebrates_non-redundant.meme	MA1141.1	http://jaspar2018.genereg.net/matrix/MA1141.1
65	1	23	JASPAR2018_CORE_vertebrates_non-redundant.meme	MA0526.2	USF2	NNNGGTCACGTGRYYN	16	80	5.62e-08	3.47e-05	1	JASPAR2018_CORE_vertebrates_non-redundant.meme	MA0526.2	http://jaspar2018.genereg.net/matrix/MA0526.2
66	0	20	JASPAR2018_CORE_vertebrates_non-redundant.meme	MA1138.1	FOSL2::JUNB	KRTGASTCAT	10	271	6.22e-08	3.84e-05	1	JASPAR2018_CORE_vertebrates_non-redundant.meme	MA1138.1	http://jaspar2018.genereg.net/matrix/MA1138.1
67	0	22	JASPAR2018_CORE_vertebrates_non-redundant.meme	MA0159.1	RARA::RXRA	RGKTCANVGRSAGGTCA	17	333	7.58e-08	4.68e-05	1	JASPAR2018_CORE_vertebrates_non-redundant.meme	MA0159.1	http://jaspar2018.genereg.net/matrix/MA0159.1
68	1	24	JASPAR2018_CORE_vertebrates_non-redundant.meme	MA0815.1	TFAP2C(var.3)	TGCCCYSRGGGCA	13	349	8.41e-08	5.19e-05	1	JASPAR2018_CORE_vertebrates_non-redundant.meme	MA0815.1	http://jaspar2018.genereg.net/matrix/MA0815.1
69	1	25	JASPAR2018_CORE_vertebrates_non-redundant.meme	MA0601.1	Arid3b	ATATTAATWAN	11	137	8.62e-08	5.32e-05	1	JASPAR2018_CORE_vertebrates_non-redundant.meme	MA0601.1	http://jaspar2018.genereg.net/matrix/MA0601.1
70	0	20	JASPAR2018_CORE_vertebrates_non-redundant.meme	MA0489.1	JUN(var.2)	RRRRRRTGASTCAT	14	316	1.19e-07	7.34e-05	1	JASPAR2018_CORE_vertebrates_non-redundant.meme	MA0489.1	http://jaspar2018.genereg.net/matrix/MA0489.1
71	0	20	JASPAR2018_CORE_vertebrates_non-redundant.meme	MA0490.1	JUNB	NRRTGASTCAK	11	176	1.25e-07	7.74e-05	1	JASPAR2018_CORE_vertebrates_non-redundant.meme	MA0490.1	http://jaspar2018.genereg.net/matrix/MA0490.1
72	0	18	JASPAR2018_CORE_vertebrates_non-redundant.meme	MA0137.3	STAT1	TTTCYRGGAAA	11	378	1.45e-07	8.96e-05	1	JASPAR2018_CORE_vertebrates_non-redundant.meme	MA0137.3	http://jaspar2018.genereg.net/matrix/MA0137.3
73	0	20	JASPAR2018_CORE_vertebrates_non-redundant.meme	MA1135.1	FOSB::JUNB	KRTGASTCAT	10	281	2.52e-07	0.000156	1	JASPAR2018_CORE_vertebrates_non-redundant.meme	MA1135.1	http://jaspar2018.genereg.net/matrix/MA1135.1
74	1	26	JASPAR2018_CORE_vertebrates_non-redundant.meme	MA0107.1	RELA	GGGRATTTCC	10	209	2.56e-07	0.000158	1	JASPAR2018_CORE_vertebrates_non-redundant.meme	MA0107.1	http://jaspar2018.genereg.net/matrix/MA0107.1
75	0	17	JASPAR2018_CORE_vertebrates_non-redundant.meme	MA0599.1	KLF5	GCCCCDCCCH	10	211	2.73e-07	0.000169	1	JASPAR2018_CORE_vertebrates_non-redundant.meme	MA0599.1	http://jaspar2018.genereg.net/matrix/MA0599.1
76	0	20	JASPAR2018_CORE_vertebrates_non-redundant.meme	MA1134.1	FOS::JUNB	KATGASTCATHN	12	243	3.99e-07	0.000246	1	JASPAR2018_CORE_vertebrates_non-redundant.meme	MA1134.1	http://jaspar2018.genereg.net/matrix/MA1134.1
77	0	20	JASPAR2018_CORE_vertebrates_non-redundant.meme	MA1130.1	FOSL2::JUN	NNRTGAGTCAYN	12	320	4.22e-07	0.00026	1	JASPAR2018_CORE_vertebrates_non-redundant.meme	MA1130.1	http://jaspar2018.genereg.net/matrix/MA1130.1
78	0	24	JASPAR2018_CORE_vertebrates_non-redundant.meme	MA0813.1	TFAP2B(var.3)	TGCCCYBRGGGCA	13	354	7.44e-07	0.000459	1	JASPAR2018_CORE_vertebrates_non-redundant.meme	MA0813.1	http://jaspar2018.genereg.net/matrix/MA0813.1
79	0	20	JASPAR2018_CORE_vertebrates_non-redundant.meme	MA0099.3	FOS::JUN	ATGAGTCAYM	10	221	1.47e-06	0.000907	1	JASPAR2018_CORE_vertebrates_non-redundant.meme	MA0099.3	http://jaspar2018.genereg.net/matrix/MA0099.3
80	0	25	JASPAR2018_CORE_vertebrates_non-redundant.meme	MA0790.1	POU4F1	ATGMATAATTAATG	14	374	1.47e-06	0.000908	1	JASPAR2018_CORE_vertebrates_non-redundant.meme	MA0790.1	http://jaspar2018.genereg.net/matrix/MA0790.1
81	0	20	JASPAR2018_CORE_vertebrates_non-redundant.meme	MA0491.1	JUND	DRTGASTCATS	11	249	1.64e-06	0.00101	1	JASPAR2018_CORE_vertebrates_non-redundant.meme	MA0491.1	http://jaspar2018.genereg.net/matrix/MA0491.1
82	1	27	STREME	20-CCTTCTCCTCCTGCC	STREME-20	20-CCTTCTCCTCCTGCC	15	127	1.84e-06	1.26	1	JASPAR2018_CORE_vertebrates_non-redundant.meme	MA0528.1 (ZNF263)	http://jaspar2018.genereg.net/matrix/MA0528.1
83	1	28	JASPAR2018_CORE_vertebrates_non-redundant.meme	MA0052.3	MEF2A	KCTAWAAATAGM	12	219	1.97e-06	0.00121	1	JASPAR2018_CORE_vertebrates_non-redundant.meme	MA0052.3	http://jaspar2018.genereg.net/matrix/MA0052.3
84	0	25	JASPAR2018_CORE_vertebrates_non-redundant.meme	MA0910.1	Hoxd8	TAADTAATTAATRGCTN	17	96	2.05e-06	0.00126	1	JASPAR2018_CORE_vertebrates_non-redundant.meme	MA0910.1	http://jaspar2018.genereg.net/matrix/MA0910.1
85	0	17	JASPAR2018_CORE_vertebrates_non-redundant.meme	MA0747.1	SP8	RCCACGCCCMCY	12	133	2.26e-06	0.0014	1	JASPAR2018_CORE_vertebrates_non-redundant.meme	MA0747.1	http://jaspar2018.genereg.net/matrix/MA0747.1
86	0	23	JASPAR2018_CORE_vertebrates_non-redundant.meme	MA0622.1	Mlxip	BCACGTGK	8	144	3.31e-06	0.00204	1	JASPAR2018_CORE_vertebrates_non-redundant.meme	MA0622.1	http://jaspar2018.genereg.net/matrix/MA0622.1
87	0	23	JASPAR2018_CORE_vertebrates_non-redundant.meme	MA1108.1	MXI1	NVVCCACGTGSNB	13	151	5.06e-06	0.00312	1	JASPAR2018_CORE_vertebrates_non-redundant.meme	MA1108.1	http://jaspar2018.genereg.net/matrix/MA1108.1
88	0	17	JASPAR2018_CORE_vertebrates_non-redundant.meme	MA0746.1	SP3	VCCACGCCCMC	11	133	5.16e-06	0.00318	1	JASPAR2018_CORE_vertebrates_non-redundant.meme	MA0746.1	http://jaspar2018.genereg.net/matrix/MA0746.1
89	0	23	JASPAR2018_CORE_vertebrates_non-redundant.meme	MA0104.4	MYCN	VVCCACGTGGBB	12	175	5.43e-06	0.00335	1	JASPAR2018_CORE_vertebrates_non-redundant.meme	MA0104.4	http://jaspar2018.genereg.net/matrix/MA0104.4
90	1	29	JASPAR2018_CORE_vertebrates_non-redundant.meme	MA0851.1	Foxj3	NDAADGTAAACAAANNM	17	359	5.65e-06	0.00349	1	JASPAR2018_CORE_vertebrates_non-redundant.meme	MA0851.1	http://jaspar2018.genereg.net/matrix/MA0851.1
91	0	20	JASPAR2018_CORE_vertebrates_non-redundant.meme	MA0477.1	FOSL1	RRTGASTCAKV	11	208	5.69e-06	0.00351	1	JASPAR2018_CORE_vertebrates_non-redundant.meme	MA0477.1	http://jaspar2018.genereg.net/matrix/MA0477.1
92	0	23	JASPAR2018_CORE_vertebrates_non-redundant.meme	MA1145.1	FOSL2::JUND(var.2)	NNRTGACGTCAYHSN	15	172	6.81e-06	0.0042	1	JASPAR2018_CORE_vertebrates_non-redundant.meme	MA1145.1	http://jaspar2018.genereg.net/matrix/MA1145.1
93	0	29	JASPAR2018_CORE_vertebrates_non-redundant.meme	MA0845.1	FOXB1	WATGTAAATAT	11	282	8.2e-06	0.00506	1	JASPAR2018_CORE_vertebrates_non-redundant.meme	MA0845.1	http://jaspar2018.genereg.net/matrix/MA0845.1
94	1	30	JASPAR2018_CORE_vertebrates_non-redundant.meme	MA0149.1	EWSR1-FLI1	GGAAGGAAGGAAGGAAGG	18	34	8.53e-06	0.00526	1	JASPAR2018_CORE_vertebrates_non-redundant.meme	MA0149.1	http://jaspar2018.genereg.net/matrix/MA0149.1
95	0	21	JASPAR2018_CORE_vertebrates_non-redundant.meme	MA1131.1	FOSL2::JUN(var.2)	GRTGACGTMAT	11	107	1.14e-05	0.00706	1	JASPAR2018_CORE_vertebrates_non-redundant.meme	MA1131.1	http://jaspar2018.genereg.net/matrix/MA1131.1
96	0	25	JASPAR2018_CORE_vertebrates_non-redundant.meme	MA0153.2	HNF1B	GTTAATNATTAAY	13	329	1.87e-05	0.0115	1	JASPAR2018_CORE_vertebrates_non-redundant.meme	MA0153.2	http://jaspar2018.genereg.net/matrix/MA0153.2
97	1	31	JASPAR2018_CORE_vertebrates_non-redundant.meme	MA1155.1	ZSCAN4	TGCACACACTGAAAA	15	153	2.36e-05	0.0146	1	JASPAR2018_CORE_vertebrates_non-redundant.meme	MA1155.1	http://jaspar2018.genereg.net/matrix/MA1155.1
98	0	26	JASPAR2018_CORE_vertebrates_non-redundant.meme	MA0101.1	REL	BGGRNWTTCC	10	213	3.95e-05	0.0244	1	JASPAR2018_CORE_vertebrates_non-redundant.meme	MA0101.1	http://jaspar2018.genereg.net/matrix/MA0101.1
99	1	32	JASPAR2018_CORE_vertebrates_non-redundant.meme	MA0513.1	SMAD2::SMAD3::SMAD4	CTGTCTGDCACCT	13	73	4.12e-05	0.0254	1	JASPAR2018_CORE_vertebrates_non-redundant.meme	MA0513.1	http://jaspar2018.genereg.net/matrix/MA0513.1
100	1	33	JASPAR2018_CORE_vertebrates_non-redundant.meme	MA0510.2	RFX5	SGTTGCCATGGYAACV	16	77	4.28e-05	0.0264	1	JASPAR2018_CORE_vertebrates_non-redundant.meme	MA0510.2	http://jaspar2018.genereg.net/matrix/MA0510.2
101	0	17	JASPAR2018_CORE_vertebrates_non-redundant.meme	MA0741.1	KLF16	GMCACGCCCCC	11	152	4.43e-05	0.0273	1	JASPAR2018_CORE_vertebrates_non-redundant.meme	MA0741.1	http://jaspar2018.genereg.net/matrix/MA0741.1
102	0	25	JASPAR2018_CORE_vertebrates_non-redundant.meme	MA0046.2	HNF1A	DRTTAATNATTAACN	15	393	5.64e-05	0.0348	1	JASPAR2018_CORE_vertebrates_non-redundant.meme	MA0046.2	http://jaspar2018.genereg.net/matrix/MA0046.2
103	0	20	JASPAR2018_CORE_vertebrates_non-redundant.meme	MA0655.1	JDP2	ATGACTCAT	9	227	6.36e-05	0.0392	1	JASPAR2018_CORE_vertebrates_non-redundant.meme	MA0655.1	http://jaspar2018.genereg.net/matrix/MA0655.1
104	0	29	JASPAR2018_CORE_vertebrates_non-redundant.meme	MA0041.1	Foxd3	GWWTGTTTDTTT	12	352	7.26e-05	0.0448	1	JASPAR2018_CORE_vertebrates_non-redundant.meme	MA0041.1	http://jaspar2018.genereg.net/matrix/MA0041.1
105	1	34	MEME	CATCTGTAAAATRGD	MEME-13	CATCTGTAAAATRGD	15	44	9.89e-05	0.00093	1	MEME	CATCTGTAAAATRGD

## Sheet: IFNG-inducible STAT1
RANK	SEED_MOTIF	CLUSTER	SOURCE	ID	ALT_ID	CONSENSUS	WIDTH	SITES	SEA_PVALUE	EVALUE	EVALUE_ACC	SIM_SOURCE	SIM_MOTIF	MOTIF_URL
1	1	1	STREME	2-AGAGTCGGACAYGACTGA	STREME-2	AGAGTCGGACAYGACTGA	18	137	5.16e-37	0.00488	1	STREME	2-AGAGTCGGACAYGACTGA
2	0	1	MEME	AAGAGTCGGACACGACTGAG	MEME-1	AAGAGTCGGACACGACTGAG	20	130	8.02e-36	6.3e-94	1	MEME	AAGAGTCGGACACGACTGAG
3	0	1	MEME	CAGTCGTGTCCGACTCTKTG	MEME-11	CAGTCGTGTCCGACTCTKTG	20	34	1.01e-33	5e-14	1	MEME	CAGTCGTGTCCGACTCTKTG
4	1	2	STREME	4-ACTCCAGTATTCTTGCCTGG	STREME-4	ACTCCAGTATTCTTGCCTGG	20	130	2.01e-33	0.0342	1	STREME	4-ACTCCAGTATTCTTGCCTGG
5	1	3	MEME	CTGGAGAATCCCATGGACRG	MEME-2	CTGGAGAATCCCATGGACRG	20	118	1.08e-31	1.8e-86	1	JASPAR2018_CORE_vertebrates_non-redundant.meme	MA0778.1 (NFKB2)	http://jaspar2018.genereg.net/matrix/MA0778.1
6	1	4	MEME	CTGGAGTGGGTTGCCATTT	MEME-3	CTGGAGTGGGTTGCCATTT	19	126	1.27e-31	8.6e-68	1	MEME	CTGGAGTGGGTTGCCATTT
7	1	5	MEME	ACTGYAGCCYRCCAGGCTCC	MEME-4	ACTGYAGCCYRCCAGGCTCC	20	132	4.01e-30	7.2e-50	1	MEME	ACTGYAGCCYRCCAGGCTCC
8	0	3	MEME	ATGGGATTTTCCAGGCAAGA	MEME-9	ATGGGATTTTCCAGGCAAGA	20	45	2.6e-29	2.4e-19	1	JASPAR2018_CORE_vertebrates_non-redundant.meme	MA0107.1 (RELA)	http://jaspar2018.genereg.net/matrix/MA0107.1
9	1	6	STREME	5-TGGAGAAGGAAATGGCAACC	STREME-5	TGGAGAAGGAAATGGCAACC	20	111	3.3e-25	0.0391	1	JASPAR2018_CORE_vertebrates_non-redundant.meme	MA1418.1 (IRF3)	http://jaspar2018.genereg.net/matrix/MA1418.1
10	1	7	STREME	1-CAGGCTCCTCYGTCCATGG	STREME-1	CAGGCTCCTCYGTCCATGG	19	138	3.19e-24	0.00061	1	STREME	1-CAGGCTCCTCYGTCCATGG
11	1	8	STREME	3-ACCCCATGGACTGYAGC	STREME-3	ACCCCATGGACTGYAGC	17	132	2.76e-23	0.00488	1	JASPAR2018_CORE_vertebrates_non-redundant.meme	MA0138.2 (REST)	http://jaspar2018.genereg.net/matrix/MA0138.2
12	0	4	MEME	AGAAGGSAAWGGCAMCCCAC	MEME-12	AGAAGGSAAWGGCAMCCCAC	20	42	6.2e-23	2.4e-09	1	MEME	AGAAGGSAAWGGCAMCCCAC
13	0	8	MEME	TGGGCTGCMGTCYATGGGGT	MEME-18	TGGGCTGCMGTCYATGGGGT	20	15	2.53e-22	2.6e-07	1	MEME	TGGGCTGCMGTCYATGGGGT
14	0	15	JASPAR2018_CORE_vertebrates_non-redundant.meme	MA0518.1	Stat4	YTTCYRGGAARNVR	14	129	4.62e-22	2.88e-19	1	JASPAR2018_CORE_vertebrates_non-redundant.meme	MA0518.1	http://jaspar2018.genereg.net/matrix/MA0518.1
15	1	9	MEME	AGGGGATCTTCCCRACCCAG	MEME-5	AGGGGATCTTCCCRACCCAG	20	69	4e-21	6e-46	1	JASPAR2018_CORE_vertebrates_non-redundant.meme	MA0107.1 (RELA)	http://jaspar2018.genereg.net/matrix/MA0107.1
16	0	11	JASPAR2018_CORE_vertebrates_non-redundant.meme	MA0050.2	IRF1	NTTYASTTTCACTTTCDBTTT	21	103	8.3e-21	5.17e-18	1	JASPAR2018_CORE_vertebrates_non-redundant.meme	MA0050.2	http://jaspar2018.genereg.net/matrix/MA0050.2
17	1	10	STREME	8-AAGAATCTGCCTGCAA	STREME-8	AAGAATCTGCCTGCAA	16	74	1.26e-19	0.156	1	STREME	8-AAGAATCTGCCTGCAA
18	1	11	STREME	17-RAAAGTGAAAGTGAA	STREME-17	17-RAAAGTGAAAGTGAA	15	95	5.03e-19	3.75	1	JASPAR2018_CORE_vertebrates_non-redundant.meme	MA0050.2 (IRF1)	http://jaspar2018.genereg.net/matrix/MA0050.2
19	0	15	JASPAR2018_CORE_vertebrates_non-redundant.meme	MA0137.3	STAT1	TTTCYRGGAAA	11	139	3.71e-18	2.31e-15	1	JASPAR2018_CORE_vertebrates_non-redundant.meme	MA0137.3	http://jaspar2018.genereg.net/matrix/MA0137.3
20	1	12	MEME	AACCCAKGTCYMYTGMRTTG	MEME-10	AACCCAKGTCYMYTGMRTTG	20	57	1.23e-17	6.8e-19	1	MEME	AACCCAKGTCYMYTGMRTTG
21	1	13	MEME	CTGARCCACCAGGGAAGYCC	MEME-7	CTGARCCACCAGGGAAGYCC	20	63	1.55e-17	5.8e-31	1	MEME	CTGARCCACCAGGGAAGYCC
22	0	15	JASPAR2018_CORE_vertebrates_non-redundant.meme	MA0519.1	Stat5a::Stat5b	DTTTCCMAGAA	11	88	2.73e-16	1.7e-13	1	JASPAR2018_CORE_vertebrates_non-redundant.meme	MA0519.1	http://jaspar2018.genereg.net/matrix/MA0519.1
23	1	14	MEME	RRGGGVDGRAGGDGRARGRG	MEME-6	RRGGGVDGRAGGDGRARGRG	20	312	4.57e-16	1.1e-42	1	JASPAR2018_CORE_vertebrates_non-redundant.meme	MA0528.1 (ZNF263)	http://jaspar2018.genereg.net/matrix/MA0528.1
24	1	15	STREME	15-ATTTCCAGGAA	STREME-15	15-ATTTCCAGGAA	11	125	2.44e-15	1.25	1	JASPAR2018_CORE_vertebrates_non-redundant.meme	MA0137.3 (STAT1)	http://jaspar2018.genereg.net/matrix/MA0137.3
25	0	11	JASPAR2018_CORE_vertebrates_non-redundant.meme	MA0051.1	IRF2	SGAAAGYGAAASCRWWWM	18	109	2.96e-15	1.84e-12	1	JASPAR2018_CORE_vertebrates_non-redundant.meme	MA0051.1	http://jaspar2018.genereg.net/matrix/MA0051.1
26	0	12	STREME	7-ATYGAACCCRGGTCTCC	STREME-7	ATYGAACCCRGGTCTCC	17	85	5.57e-15	0.156	1	STREME	7-ATYGAACCCRGGTCTCC
27	0	11	MEME	TTTTWTTTTYWYTTT	MEME-8	TTTTWTTTTYWYTTT	15	213	8.35e-15	9.4e-27	1	JASPAR2018_CORE_vertebrates_non-redundant.meme	MA0050.2 (IRF1)	http://jaspar2018.genereg.net/matrix/MA0050.2
28	0	6	JASPAR2018_CORE_vertebrates_non-redundant.meme	MA1418.1	IRF3	NSRRAAMGGAAACCGAAACYR	21	116	1.51e-14	9.4e-12	1	JASPAR2018_CORE_vertebrates_non-redundant.meme	MA1418.1	http://jaspar2018.genereg.net/matrix/MA1418.1
29	0	11	JASPAR2018_CORE_vertebrates_non-redundant.meme	MA0517.1	STAT1::STAT2	THAGTTTCRKTTTCY	15	99	1.86e-14	1.16e-11	1	JASPAR2018_CORE_vertebrates_non-redundant.meme	MA0517.1	http://jaspar2018.genereg.net/matrix/MA0517.1
30	0	15	MEME	TTTCCTGGAA	MEME-22	TTTCCTGGAA	10	194	3.49e-14	0.015	1	JASPAR2018_CORE_vertebrates_non-redundant.meme	MA0137.3 (STAT1)	http://jaspar2018.genereg.net/matrix/MA0137.3
31	1	16	STREME	10-AAAAAAAAAAAARM	STREME-10	10-AAAAAAAAAAAARM	14	75	4.52e-14	0.312	1	JASPAR2018_CORE_vertebrates_non-redundant.meme	MA1125.1 (ZNF384)	http://jaspar2018.genereg.net/matrix/MA1125.1
32	0	9	STREME	6-GGGGATCTTCCCAACCCA	STREME-6	GGGGATCTTCCCAACCCA	18	86	6.59e-14	0.0781	1	JASPAR2018_CORE_vertebrates_non-redundant.meme	MA0107.1 (RELA)	http://jaspar2018.genereg.net/matrix/MA0107.1
33	1	17	STREME	11-ACACACACACACAC	STREME-11	11-ACACACACACACAC	14	60	9.62e-13	0.312	1	JASPAR2018_CORE_vertebrates_non-redundant.meme	MA1107.1 (KLF9)	http://jaspar2018.genereg.net/matrix/MA1107.1
34	0	14	MEME	GGGAGDKGGKGRKGGRSAGG	MEME-20	GGGAGDKGGKGRKGGRSAGG	20	135	1.27e-12	4.7e-05	1	JASPAR2018_CORE_vertebrates_non-redundant.meme	MA0528.1 (ZNF263)	http://jaspar2018.genereg.net/matrix/MA0528.1
35	0	17	MEME	GTGTGTGTGTGTGTGTGTGT	MEME-21	GTGTGTGTGTGTGTGTGTGT	20	39	2e-12	0.0049	1	MEME	GTGTGTGTGTGTGTGTGTGT
36	0	13	STREME	14-CCTGGTGGCTCAGWGG	STREME-14	14-CCTGGTGGCTCAGWGG	16	78	4e-12	0.703	1	STREME	14-CCTGGTGGCTCAGWGG
37	0	11	JASPAR2018_CORE_vertebrates_non-redundant.meme	MA0653.1	IRF9	AACGAAACCGAAACT	15	72	8.33e-11	5.19e-08	1	JASPAR2018_CORE_vertebrates_non-redundant.meme	MA0653.1	http://jaspar2018.genereg.net/matrix/MA0653.1
38	1	18	MEME	RMTGMTGCTGCWGCTRAGW	MEME-19	RMTGMTGCTGCWGCTRAGW	19	39	1.26e-10	1.2e-08	1	MEME	RMTGMTGCTGCWGCTRAGW
39	1	19	STREME	12-CTGACTCATTGG	STREME-12	12-CTGACTCATTGG	12	49	3.17e-10	0.625	1	JASPAR2018_CORE_vertebrates_non-redundant.meme	MA0655.1 (JDP2)	http://jaspar2018.genereg.net/matrix/MA0655.1
40	0	14	STREME	9-CCCCRCCCCCHCCCC	STREME-9	CCCCRCCCCCHCCCC	15	83	6.69e-10	0.312	1	JASPAR2018_CORE_vertebrates_non-redundant.meme	MA0516.1 (SP2)	http://jaspar2018.genereg.net/matrix/MA0516.1
41	0	11	JASPAR2018_CORE_vertebrates_non-redundant.meme	MA0772.1	IRF7	HCGAAARYGAAAVT	14	118	9.06e-10	5.64e-07	1	JASPAR2018_CORE_vertebrates_non-redundant.meme	MA0772.1	http://jaspar2018.genereg.net/matrix/MA0772.1
42	0	19	JASPAR2018_CORE_vertebrates_non-redundant.meme	MA0490.1	JUNB	NRRTGASTCAK	11	113	1.76e-09	1.1e-06	1	JASPAR2018_CORE_vertebrates_non-redundant.meme	MA0490.1	http://jaspar2018.genereg.net/matrix/MA0490.1
43	0	11	JASPAR2018_CORE_vertebrates_non-redundant.meme	MA1419.1	IRF4	HCGAAACCGAAACYA	15	85	2.04e-09	1.27e-06	1	JASPAR2018_CORE_vertebrates_non-redundant.meme	MA1419.1	http://jaspar2018.genereg.net/matrix/MA1419.1
44	0	14	JASPAR2018_CORE_vertebrates_non-redundant.meme	MA0528.1	ZNF263	GGAGGAGGRRGRGGRGGRRGR	21	155	5.56e-09	3.46e-06	1	JASPAR2018_CORE_vertebrates_non-redundant.meme	MA0528.1	http://jaspar2018.genereg.net/matrix/MA0528.1
45	0	19	JASPAR2018_CORE_vertebrates_non-redundant.meme	MA0477.1	FOSL1	RRTGASTCAKV	11	100	5.84e-09	3.64e-06	1	JASPAR2018_CORE_vertebrates_non-redundant.meme	MA0477.1	http://jaspar2018.genereg.net/matrix/MA0477.1
46	0	14	STREME	13-CCCCTTCYCCTCCTGCCC	STREME-13	13-CCCCTTCYCCTCCTGCCC	18	72	3.37e-08	0.703	1	JASPAR2018_CORE_vertebrates_non-redundant.meme	MA0528.1 (ZNF263)	http://jaspar2018.genereg.net/matrix/MA0528.1
47	1	20	JASPAR2018_CORE_vertebrates_non-redundant.meme	MA0488.1	JUN	DDRATGATGTCAT	13	74	5.37e-08	3.34e-05	1	JASPAR2018_CORE_vertebrates_non-redundant.meme	MA0488.1	http://jaspar2018.genereg.net/matrix/MA0488.1
48	0	15	JASPAR2018_CORE_vertebrates_non-redundant.meme	MA0144.2	STAT3	YTTCYKGGAAD	11	28	5.97e-08	3.72e-05	1	JASPAR2018_CORE_vertebrates_non-redundant.meme	MA0144.2	http://jaspar2018.genereg.net/matrix/MA0144.2
49	1	21	MEME	GAGATGGYTGGATGGCATCA	MEME-13	GAGATGGYTGGATGGCATCA	20	26	6.32e-08	2.9e-09	1	JASPAR2018_CORE_vertebrates_non-redundant.meme	MA0739.1 (Hic1)	http://jaspar2018.genereg.net/matrix/MA0739.1
50	0	18	STREME	16-GCAGCAGCAGCAGC	STREME-16	16-GCAGCAGCAGCAGC	14	45	8.01e-08	1.25	1	JASPAR2018_CORE_vertebrates_non-redundant.meme	MA1100.1 (ASCL1)	http://jaspar2018.genereg.net/matrix/MA1100.1
51	1	22	MEME	TCCCAGCATCAGRGTCTTTT	MEME-14	TCCCAGCATCAGRGTCTTTT	20	25	2.52e-07	3.4e-08	1	MEME	TCCCAGCATCAGRGTCTTTT
52	0	19	JASPAR2018_CORE_vertebrates_non-redundant.meme	MA1144.1	FOSL2::JUND	KATGACTCAT	10	78	3.68e-07	0.000229	1	JASPAR2018_CORE_vertebrates_non-redundant.meme	MA1144.1	http://jaspar2018.genereg.net/matrix/MA1144.1
53	0	19	JASPAR2018_CORE_vertebrates_non-redundant.meme	MA1138.1	FOSL2::JUNB	KRTGASTCAT	10	142	5.13e-07	0.00032	1	JASPAR2018_CORE_vertebrates_non-redundant.meme	MA1138.1	http://jaspar2018.genereg.net/matrix/MA1138.1
54	0	19	JASPAR2018_CORE_vertebrates_non-redundant.meme	MA0476.1	FOS	DVTGASTCATB	11	178	7.27e-07	0.000453	1	JASPAR2018_CORE_vertebrates_non-redundant.meme	MA0476.1	http://jaspar2018.genereg.net/matrix/MA0476.1
55	0	19	JASPAR2018_CORE_vertebrates_non-redundant.meme	MA0491.1	JUND	DRTGASTCATS	11	135	7.63e-07	0.000476	1	JASPAR2018_CORE_vertebrates_non-redundant.meme	MA0491.1	http://jaspar2018.genereg.net/matrix/MA0491.1
56	0	19	JASPAR2018_CORE_vertebrates_non-redundant.meme	MA0478.1	FOSL2	KRRTGASTCAB	11	139	8.21e-07	0.000512	1	JASPAR2018_CORE_vertebrates_non-redundant.meme	MA0478.1	http://jaspar2018.genereg.net/matrix/MA0478.1
57	0	19	JASPAR2018_CORE_vertebrates_non-redundant.meme	MA1141.1	FOS::JUND	NKATGAGTCATNN	13	146	8.25e-07	0.000514	1	JASPAR2018_CORE_vertebrates_non-redundant.meme	MA1141.1	http://jaspar2018.genereg.net/matrix/MA1141.1
58	0	19	JASPAR2018_CORE_vertebrates_non-redundant.meme	MA0489.1	JUN(var.2)	RRRRRRTGASTCAT	14	58	1.21e-06	0.000753	1	JASPAR2018_CORE_vertebrates_non-redundant.meme	MA0489.1	http://jaspar2018.genereg.net/matrix/MA0489.1
59	0	11	JASPAR2018_CORE_vertebrates_non-redundant.meme	MA0652.1	IRF8	HCGAAACCGAAACT	14	29	1.36e-06	0.000849	1	JASPAR2018_CORE_vertebrates_non-redundant.meme	MA0652.1	http://jaspar2018.genereg.net/matrix/MA0652.1
60	1	23	MEME	ARTACTTTGGCCACCTSATG	MEME-16	ARTACTTTGGCCACCTSATG	20	13	2e-06	7e-06	1	MEME	ARTACTTTGGCCACCTSATG
61	0	19	JASPAR2018_CORE_vertebrates_non-redundant.meme	MA0591.1	Bach1::Mafk	RSSATGACTCAGCAB	15	91	3.35e-06	0.00208	1	JASPAR2018_CORE_vertebrates_non-redundant.meme	MA0591.1	http://jaspar2018.genereg.net/matrix/MA0591.1
62	0	19	MEME	AAGGAGATCMAACCAGTCMA	MEME-17	AAGGAGATCMAACCAGTCMA	20	16	3.99e-06	5.6e-07	1	MEME	AAGGAGATCMAACCAGTCMA
63	0	19	JASPAR2018_CORE_vertebrates_non-redundant.meme	MA0501.1	MAF::NFE2	ATGACTCAGCANWTY	15	58	5.39e-06	0.00336	1	JASPAR2018_CORE_vertebrates_non-redundant.meme	MA0501.1	http://jaspar2018.genereg.net/matrix/MA0501.1
64	0	19	JASPAR2018_CORE_vertebrates_non-redundant.meme	MA1137.1	FOSL1::JUNB	NDRTGACTCATNN	13	99	7.28e-06	0.00454	1	JASPAR2018_CORE_vertebrates_non-redundant.meme	MA1137.1	http://jaspar2018.genereg.net/matrix/MA1137.1
65	1	24	MEME	CAGGRCTGATYTCCTTYAGR	MEME-15	CAGGRCTGATYTCCTTYAGR	20	17	7.95e-06	2.2e-07	1	MEME	CAGGRCTGATYTCCTTYAGR
66	0	19	JASPAR2018_CORE_vertebrates_non-redundant.meme	MA1142.1	FOSL1::JUND	NRTGACTCAT	10	109	1.13e-05	0.00706	1	JASPAR2018_CORE_vertebrates_non-redundant.meme	MA1142.1	http://jaspar2018.genereg.net/matrix/MA1142.1
67	0	19	JASPAR2018_CORE_vertebrates_non-redundant.meme	MA1132.1	JUN::JUNB	KATGACKCAT	10	73	1.51e-05	0.00943	1	JASPAR2018_CORE_vertebrates_non-redundant.meme	MA1132.1	http://jaspar2018.genereg.net/matrix/MA1132.1
68	0	14	JASPAR2018_CORE_vertebrates_non-redundant.meme	MA0073.1	RREB1	CCCCMAAMCAMCCMCMMMCV	20	71	3.07e-05	0.0191	1	JASPAR2018_CORE_vertebrates_non-redundant.meme	MA0073.1	http://jaspar2018.genereg.net/matrix/MA0073.1
69	1	25	MEME	CGACTGAACTGAACTGAA	MEME-24	CGACTGAACTGAACTGAA	18	10	3.17e-05	0.0035	1	MEME	CGACTGAACTGAACTGAA
70	0	19	JASPAR2018_CORE_vertebrates_non-redundant.meme	MA1101.1	BACH2	NMTGACTCAGCANH	14	115	3.28e-05	0.0204	1	JASPAR2018_CORE_vertebrates_non-redundant.meme	MA1101.1	http://jaspar2018.genereg.net/matrix/MA1101.1
71	0	11	JASPAR2018_CORE_vertebrates_non-redundant.meme	MA0508.2	PRDM1	TCACTTTCWC	10	45	3.53e-05	0.022	1	JASPAR2018_CORE_vertebrates_non-redundant.meme	MA0508.2	http://jaspar2018.genereg.net/matrix/MA0508.2
72	0	15	JASPAR2018_CORE_vertebrates_non-redundant.meme	MA0152.1	NFATC2	TTTTCCA	7	64	4.21e-05	0.0262	1	JASPAR2018_CORE_vertebrates_non-redundant.meme	MA0152.1	http://jaspar2018.genereg.net/matrix/MA0152.1
73	0	14	JASPAR2018_CORE_vertebrates_non-redundant.meme	MA0516.1	SP2	GYCCCGCCYCYBSSS	15	44	5.42e-05	0.0337	1	JASPAR2018_CORE_vertebrates_non-redundant.meme	MA0516.1	http://jaspar2018.genereg.net/matrix/MA0516.1
74	0	15	JASPAR2018_CORE_vertebrates_non-redundant.meme	MA0463.1	Bcl6	DTTCCTRGAAAGCH	14	90	7.5e-05	0.0467	1	JASPAR2018_CORE_vertebrates_non-redundant.meme	MA0463.1	http://jaspar2018.genereg.net/matrix/MA0463.1
75	1	26	MEME	TGGAATAATCCTCCCACTCA	MEME-23	TGGAATAATCCTCCCACTCA	20	6	7.54e-05	0.024	1	JASPAR2018_CORE_vertebrates_non-redundant.meme	MA0472.2 (EGR2)	http://jaspar2018.genereg.net/matrix/MA0472.2
76	1	27	STREME	18-RCCATCTCATCCTCTG	STREME-18	18-RCCATCTCATCCTCTG	16	39	0.00102	6.25	1	STREME	18-RCCATCTCATCCTCTG
77	1	28	STREME	19-GCATGTGGGATCTT	STREME-19	19-GCATGTGGGATCTT	14	37	0.0653	10	1	STREME	19-GCATGTGGGATCTT
78	1	29	STREME	20-ACCAACTCCCRGA	STREME-20	20-ACCAACTCCCRGA	13	36	0.0666	10	1	STREME	20-ACCAACTCCCRGA

## Sheet: IFNG-inducible pSTAT1
RANK	SEED_MOTIF	CLUSTER	SOURCE	ID	ALT_ID	CONSENSUS	WIDTH	SITES	SEA_PVALUE	EVALUE	EVALUE_ACC	SIM_SOURCE	SIM_MOTIF	MOTIF_URL
1	1	1	STREME	2-AGTCGTGTCYGACTC	STREME-2	AGTCGTGTCYGACTC	15	131	5.63e-42	0.00144	1	STREME	2-AGTCGTGTCYGACTC
2	1	2	STREME	1-GCGACCCCATGGACTGYAGC	STREME-1	GCGACCCCATGGACTGYAGC	20	132	1.47e-41	0.00144	1	JASPAR2018_CORE_vertebrates_non-redundant.meme	MA0138.2 (REST)	http://jaspar2018.genereg.net/matrix/MA0138.2
3	0	1	MEME	AGAGTCGGACACGACTGAR	MEME-11	AGAGTCGGACACGACTGAR	19	51	4.41e-37	8.6e-26	1	MEME	AGAGTCGGACACGACTGAR
4	1	3	MEME	CACTCCAGTATTCTTGCCTG	MEME-2	CACTCCAGTATTCTTGCCTG	20	113	2.43e-36	4.4e-112	1	MEME	CACTCCAGTATTCTTGCCTG
5	0	3	STREME	5-CACTCCAGTATTCTTGCCTG	STREME-5	CACTCCAGTATTCTTGCCTG	20	117	7.34e-36	0.00877	1	STREME	5-CACTCCAGTATTCTTGCCTG
6	0	1	MEME	AAGAGTCRGACACGACTGAG	MEME-1	AAGAGTCRGACACGACTGAG	20	123	1.83e-35	1.2e-115	1	MEME	AAGAGTCRGACACGACTGAG
7	1	4	STREME	3-AGGCTCCTCTGTCCA	STREME-3	AGGCTCCTCTGTCCA	15	123	1.62e-33	0.0036	1	STREME	3-AGGCTCCTCTGTCCA
8	0	4	MEME	GGACRGRGGAGCCTGGYRGG	MEME-4	GGACRGRGGAGCCTGGYRGG	20	160	6.5e-32	4.9e-91	1	MEME	GGACRGRGGAGCCTGGYRGG
9	0	3	MEME	CCACTCCAGTRTTCT	MEME-15	CCACTCCAGTRTTCT	15	40	2.81e-29	0.00017	1	JASPAR2018_CORE_vertebrates_non-redundant.meme	MA0867.1 (SOX4)	http://jaspar2018.genereg.net/matrix/MA0867.1
10	0	2	MEME	CTRCAGTCCATGGGG	MEME-8	CTRCAGTCCATGGGG	15	105	3.76e-28	3e-33	1	JASPAR2018_CORE_vertebrates_non-redundant.meme	MA0138.2 (REST)	http://jaspar2018.genereg.net/matrix/MA0138.2
11	1	5	MEME	VYBATTTCYTGGAA	MEME-14	VYBATTTCYTGGAA	14	248	2.23e-27	1.8e-16	1	JASPAR2018_CORE_vertebrates_non-redundant.meme	MA0518.1 (Stat4)	http://jaspar2018.genereg.net/matrix/MA0518.1
12	1	6	STREME	6-ATCCCTGGGTYGGGA	STREME-6	ATCCCTGGGTYGGGA	15	105	1.73e-25	0.00877	1	STREME	6-ATCCCTGGGTYGGGA
13	0	5	JASPAR2018_CORE_vertebrates_non-redundant.meme	MA0518.1	Stat4	YTTCYRGGAARNVR	14	162	2.1e-25	1.29e-22	1	JASPAR2018_CORE_vertebrates_non-redundant.meme	MA0518.1	http://jaspar2018.genereg.net/matrix/MA0518.1
14	0	6	MEME	TCCCTGGGTYGGGAAGATCC	MEME-5	TCCCTGGGTYGGGAAGATCC	20	94	1.41e-24	1.8e-86	1	MEME	TCCCTGGGTYGGGAAGATCC
15	0	11	JASPAR2018_CORE_vertebrates_non-redundant.meme	MA0050.2	IRF1	NTTYASTTTCACTTTCDBTTT	21	113	2.15e-24	1.32e-21	1	JASPAR2018_CORE_vertebrates_non-redundant.meme	MA0050.2	http://jaspar2018.genereg.net/matrix/MA0050.2
16	1	7	STREME	9-GGAGAAGGAAATGGCAAC	STREME-9	GGAGAAGGAAATGGCAAC	18	123	3.82e-24	0.11	1	JASPAR2018_CORE_vertebrates_non-redundant.meme	MA1418.1 (IRF3)	http://jaspar2018.genereg.net/matrix/MA1418.1
17	0	5	STREME	4-ATTTCCNGGAAAT	STREME-4	ATTTCCNGGAAAT	13	167	9.35e-24	0.00811	1	JASPAR2018_CORE_vertebrates_non-redundant.meme	MA0137.3 (STAT1)	http://jaspar2018.genereg.net/matrix/MA0137.3
18	1	8	STREME	12-GRCTTCCCTGGTGGCTCAGH	STREME-12	12-GRCTTCCCTGGTGGCTCAGH	20	75	3.33e-23	0.244	1	STREME	12-GRCTTCCCTGGTGGCTCAGH
19	1	9	STREME	7-GCAGGAGACCYGGGTTCR	STREME-7	GCAGGAGACCYGGGTTCR	18	89	1.42e-22	0.00877	1	STREME	7-GCAGGAGACCYGGGTTCR
20	1	10	MEME	GTCCATGGRATTCTC	MEME-16	GTCCATGGRATTCTC	15	75	8.78e-22	0.00023	1	MEME	GTCCATGGRATTCTC
21	0	11	JASPAR2018_CORE_vertebrates_non-redundant.meme	MA0051.1	IRF2	SGAAAGYGAAASCRWWWM	18	111	4.03e-21	2.49e-18	1	JASPAR2018_CORE_vertebrates_non-redundant.meme	MA0051.1	http://jaspar2018.genereg.net/matrix/MA0051.1
22	0	11	JASPAR2018_CORE_vertebrates_non-redundant.meme	MA0517.1	STAT1::STAT2	THAGTTTCRKTTTCY	15	178	6.74e-21	4.16e-18	1	JASPAR2018_CORE_vertebrates_non-redundant.meme	MA0517.1	http://jaspar2018.genereg.net/matrix/MA0517.1
23	0	8	MEME	GGGCTTCCCTGGTGGCTCAG	MEME-6	GGGCTTCCCTGGTGGCTCAG	20	73	1.04e-20	1.1e-78	1	MEME	GGGCTTCCCTGGTGGCTCAG
24	0	7	JASPAR2018_CORE_vertebrates_non-redundant.meme	MA1418.1	IRF3	NSRRAAMGGAAACCGAAACYR	21	131	5.25e-20	3.24e-17	1	JASPAR2018_CORE_vertebrates_non-redundant.meme	MA1418.1	http://jaspar2018.genereg.net/matrix/MA1418.1
25	1	11	STREME	14-AAGTGAAAGTGAA	STREME-14	14-AAGTGAAAGTGAA	13	132	1.43e-19	1.49	1	JASPAR2018_CORE_vertebrates_non-redundant.meme	MA0050.2 (IRF1)	http://jaspar2018.genereg.net/matrix/MA0050.2
26	0	5	JASPAR2018_CORE_vertebrates_non-redundant.meme	MA0144.2	STAT3	YTTCYKGGAAD	11	158	2.87e-19	1.77e-16	1	JASPAR2018_CORE_vertebrates_non-redundant.meme	MA0144.2	http://jaspar2018.genereg.net/matrix/MA0144.2
27	1	12	MEME	CAGGCRGATTCTTTA	MEME-12	CAGGCRGATTCTTTA	15	67	4.2e-19	1.3e-19	1	MEME	CAGGCRGATTCTTTA
28	0	5	JASPAR2018_CORE_vertebrates_non-redundant.meme	MA0137.3	STAT1	TTTCYRGGAAA	11	126	6.11e-19	3.77e-16	1	JASPAR2018_CORE_vertebrates_non-redundant.meme	MA0137.3	http://jaspar2018.genereg.net/matrix/MA0137.3
29	0	11	MEME	RAYTTCACTTTCACTTTYCA	MEME-9	RAYTTCACTTTCACTTTYCA	20	58	1.15e-18	1.6e-29	1	JASPAR2018_CORE_vertebrates_non-redundant.meme	MA0050.2 (IRF1)	http://jaspar2018.genereg.net/matrix/MA0050.2
30	1	13	STREME	11-TAAAAAAAAAAAAAAAAAAA	STREME-11	11-TAAAAAAAAAAAAAAAAAAA	20	126	2.39e-17	0.227	1	JASPAR2018_CORE_vertebrates_non-redundant.meme	MA1125.1 (ZNF384)	http://jaspar2018.genereg.net/matrix/MA1125.1
31	0	7	MEME	GTTGCCATTTCCTTCTCCAG	MEME-3	GTTGCCATTTCCTTCTCCAG	20	145	4.46e-17	2.6e-93	1	MEME	GTTGCCATTTCCTTCTCCAG
32	1	14	MEME	TCCCYBBYYCCTCCTSCCYY	MEME-10	TCCCYBBYYCCTCCTSCCYY	20	259	8.56e-16	9.8e-36	1	JASPAR2018_CORE_vertebrates_non-redundant.meme	MA0528.1 (ZNF263)	http://jaspar2018.genereg.net/matrix/MA0528.1
33	1	15	JASPAR2018_CORE_vertebrates_non-redundant.meme	MA0653.1	IRF9	AACGAAACCGAAACT	15	96	6.39e-15	3.95e-12	1	JASPAR2018_CORE_vertebrates_non-redundant.meme	MA0653.1	http://jaspar2018.genereg.net/matrix/MA0653.1
34	0	9	MEME	AACCYRGGTCTCCTGCATTG	MEME-7	AACCYRGGTCTCCTGCATTG	20	65	9e-15	2e-48	1	MEME	AACCYRGGTCTCCTGCATTG
35	1	16	STREME	10-AGCGACTTARCAG	STREME-10	10-AGCGACTTARCAG	13	92	2.61e-14	0.11	1	JASPAR2018_CORE_vertebrates_non-redundant.meme	MA1101.1 (BACH2)	http://jaspar2018.genereg.net/matrix/MA1101.1
36	0	5	JASPAR2018_CORE_vertebrates_non-redundant.meme	MA0519.1	Stat5a::Stat5b	DTTTCCMAGAA	11	140	3.62e-14	2.23e-11	1	JASPAR2018_CORE_vertebrates_non-redundant.meme	MA0519.1	http://jaspar2018.genereg.net/matrix/MA0519.1
37	0	11	JASPAR2018_CORE_vertebrates_non-redundant.meme	MA0508.2	PRDM1	TCACTTTCWC	10	75	1.21e-13	7.49e-11	1	JASPAR2018_CORE_vertebrates_non-redundant.meme	MA0508.2	http://jaspar2018.genereg.net/matrix/MA0508.2
38	0	11	JASPAR2018_CORE_vertebrates_non-redundant.meme	MA0772.1	IRF7	HCGAAARYGAAAVT	14	156	6.3e-13	3.89e-10	1	JASPAR2018_CORE_vertebrates_non-redundant.meme	MA0772.1	http://jaspar2018.genereg.net/matrix/MA0772.1
39	0	16	JASPAR2018_CORE_vertebrates_non-redundant.meme	MA1101.1	BACH2	NMTGACTCAGCANH	14	161	9.96e-13	6.14e-10	1	JASPAR2018_CORE_vertebrates_non-redundant.meme	MA1101.1	http://jaspar2018.genereg.net/matrix/MA1101.1
40	0	12	STREME	8-GGTAAAGAATCTGCCTGCAA	STREME-8	GGTAAAGAATCTGCCTGCAA	20	87	7.5e-12	0.0483	1	STREME	8-GGTAAAGAATCTGCCTGCAA
41	0	13	MEME	TTTTTTTTTTTTTTT	MEME-13	TTTTTTTTTTTTTTT	15	52	3.69e-11	1.7e-17	1	JASPAR2018_CORE_vertebrates_non-redundant.meme	MA1125.1 (ZNF384)	http://jaspar2018.genereg.net/matrix/MA1125.1
41	0	15	JASPAR2018_CORE_vertebrates_non-redundant.meme	MA0652.1	IRF8	HCGAAACCGAAACT	14	68	3.69e-11	2.27e-08	1	JASPAR2018_CORE_vertebrates_non-redundant.meme	MA0652.1	http://jaspar2018.genereg.net/matrix/MA0652.1
42	0	17	JASPAR2018_CORE_vertebrates_non-redundant.meme	MA0490.1	JUNB	NRRTGASTCAK	11	128	6.58e-11	4.06e-08	1	JASPAR2018_CORE_vertebrates_non-redundant.meme	MA0490.1	http://jaspar2018.genereg.net/matrix/MA0490.1
43	0	17	JASPAR2018_CORE_vertebrates_non-redundant.meme	MA0477.1	FOSL1	RRTGASTCAKV	11	129	1.46e-10	9.01e-08	1	JASPAR2018_CORE_vertebrates_non-redundant.meme	MA0477.1	http://jaspar2018.genereg.net/matrix/MA0477.1
44	0	17	JASPAR2018_CORE_vertebrates_non-redundant.meme	MA0478.1	FOSL2	KRRTGASTCAB	11	148	3.1e-10	1.91e-07	1	JASPAR2018_CORE_vertebrates_non-redundant.meme	MA0478.1	http://jaspar2018.genereg.net/matrix/MA0478.1
45	0	17	JASPAR2018_CORE_vertebrates_non-redundant.meme	MA0501.1	MAF::NFE2	ATGACTCAGCANWTY	15	62	4.56e-10	2.82e-07	1	JASPAR2018_CORE_vertebrates_non-redundant.meme	MA0501.1	http://jaspar2018.genereg.net/matrix/MA0501.1
46	0	17	JASPAR2018_CORE_vertebrates_non-redundant.meme	MA1137.1	FOSL1::JUNB	NDRTGACTCATNN	13	161	7.18e-10	4.43e-07	1	JASPAR2018_CORE_vertebrates_non-redundant.meme	MA1137.1	http://jaspar2018.genereg.net/matrix/MA1137.1
47	0	10	STREME	15-GAGAATCCCA	STREME-15	15-GAGAATCCCA	10	71	8.72e-10	1.97	1	STREME	15-GAGAATCCCA
48	0	15	JASPAR2018_CORE_vertebrates_non-redundant.meme	MA1419.1	IRF4	HCGAAACCGAAACYA	15	82	1.37e-09	8.44e-07	1	JASPAR2018_CORE_vertebrates_non-redundant.meme	MA1419.1	http://jaspar2018.genereg.net/matrix/MA1419.1
49	0	17	JASPAR2018_CORE_vertebrates_non-redundant.meme	MA1135.1	FOSB::JUNB	KRTGASTCAT	10	153	3.11e-08	1.92e-05	1	JASPAR2018_CORE_vertebrates_non-redundant.meme	MA1135.1	http://jaspar2018.genereg.net/matrix/MA1135.1
50	1	17	STREME	13-MTGASTCAK	STREME-13	13-MTGASTCAK	9	120	3.59e-08	0.326	1	JASPAR2018_CORE_vertebrates_non-redundant.meme	MA0489.1 (JUN(var.2))	http://jaspar2018.genereg.net/matrix/MA0489.1
51	0	17	JASPAR2018_CORE_vertebrates_non-redundant.meme	MA1134.1	FOS::JUNB	KATGASTCATHN	12	96	5.97e-08	3.69e-05	1	JASPAR2018_CORE_vertebrates_non-redundant.meme	MA1134.1	http://jaspar2018.genereg.net/matrix/MA1134.1
52	1	18	JASPAR2018_CORE_vertebrates_non-redundant.meme	MA0851.1	Foxj3	NDAADGTAAACAAANNM	17	134	7.57e-08	4.67e-05	1	JASPAR2018_CORE_vertebrates_non-redundant.meme	MA0851.1	http://jaspar2018.genereg.net/matrix/MA0851.1
53	0	17	JASPAR2018_CORE_vertebrates_non-redundant.meme	MA0150.2	Nfe2l2	CASNATGACTCAGCA	15	161	1.09e-07	6.72e-05	1	JASPAR2018_CORE_vertebrates_non-redundant.meme	MA0150.2	http://jaspar2018.genereg.net/matrix/MA0150.2
54	1	19	STREME	17-CACACACACACACACAC	STREME-17	17-CACACACACACACACAC	17	57	2.67e-07	2.58	1	STREME	17-CACACACACACACACAC
55	0	14	JASPAR2018_CORE_vertebrates_non-redundant.meme	MA0528.1	ZNF263	GGAGGAGGRRGRGGRGGRRGR	21	176	3.49e-07	0.000215	1	JASPAR2018_CORE_vertebrates_non-redundant.meme	MA0528.1	http://jaspar2018.genereg.net/matrix/MA0528.1
56	0	17	JASPAR2018_CORE_vertebrates_non-redundant.meme	MA0491.1	JUND	DRTGASTCATS	11	136	5.96e-07	0.000368	1	JASPAR2018_CORE_vertebrates_non-redundant.meme	MA0491.1	http://jaspar2018.genereg.net/matrix/MA0491.1
57	0	17	JASPAR2018_CORE_vertebrates_non-redundant.meme	MA0489.1	JUN(var.2)	RRRRRRTGASTCAT	14	91	1.03e-06	0.000635	1	JASPAR2018_CORE_vertebrates_non-redundant.meme	MA0489.1	http://jaspar2018.genereg.net/matrix/MA0489.1
58	0	14	STREME	18-CCCCRCCCCACCCC	STREME-18	18-CCCCRCCCCACCCC	14	51	1.39e-06	4.27	1	JASPAR2018_CORE_vertebrates_non-redundant.meme	MA0599.1 (KLF5)	http://jaspar2018.genereg.net/matrix/MA0599.1
59	1	20	MEME	CAAACTCATGTCCATYGAGT	MEME-18	CAAACTCATGTCCATYGAGT	20	21	1.43e-06	0.00039	1	MEME	CAAACTCATGTCCATYGAGT
60	1	21	JASPAR2018_CORE_vertebrates_non-redundant.meme	MA0617.1	Id2	RCACGTGR	8	62	1.61e-06	0.000993	1	JASPAR2018_CORE_vertebrates_non-redundant.meme	MA0617.1	http://jaspar2018.genereg.net/matrix/MA0617.1
61	1	22	JASPAR2018_CORE_vertebrates_non-redundant.meme	MA0073.1	RREB1	CCCCMAAMCAMCCMCMMMCV	20	69	3.69e-06	0.00228	1	JASPAR2018_CORE_vertebrates_non-redundant.meme	MA0073.1	http://jaspar2018.genereg.net/matrix/MA0073.1
62	1	23	JASPAR2018_CORE_vertebrates_non-redundant.meme	MA1107.1	KLF9	VSCCACACCCACH	13	86	4.87e-06	0.00301	1	JASPAR2018_CORE_vertebrates_non-redundant.meme	MA1107.1	http://jaspar2018.genereg.net/matrix/MA1107.1
63	0	17	JASPAR2018_CORE_vertebrates_non-redundant.meme	MA0591.1	Bach1::Mafk	RSSATGACTCAGCAB	15	112	5.04e-06	0.00311	1	JASPAR2018_CORE_vertebrates_non-redundant.meme	MA0591.1	http://jaspar2018.genereg.net/matrix/MA0591.1
64	0	21	JASPAR2018_CORE_vertebrates_non-redundant.meme	MA0871.1	TFEC	RTCACRTGAB	10	59	6.56e-06	0.00405	1	JASPAR2018_CORE_vertebrates_non-redundant.meme	MA0871.1	http://jaspar2018.genereg.net/matrix/MA0871.1
65	0	5	JASPAR2018_CORE_vertebrates_non-redundant.meme	MA0640.1	ELF3	WACCCGGAAGTAR	13	217	9.3e-06	0.00574	1	JASPAR2018_CORE_vertebrates_non-redundant.meme	MA0640.1	http://jaspar2018.genereg.net/matrix/MA0640.1
66	0	17	JASPAR2018_CORE_vertebrates_non-redundant.meme	MA1128.1	FOSL1::JUN	NKATGACTCATNN	13	193	1.12e-05	0.00693	1	JASPAR2018_CORE_vertebrates_non-redundant.meme	MA1128.1	http://jaspar2018.genereg.net/matrix/MA1128.1
67	0	23	JASPAR2018_CORE_vertebrates_non-redundant.meme	MA0746.1	SP3	VCCACGCCCMC	11	63	1.47e-05	0.00909	1	JASPAR2018_CORE_vertebrates_non-redundant.meme	MA0746.1	http://jaspar2018.genereg.net/matrix/MA0746.1
68	0	5	JASPAR2018_CORE_vertebrates_non-redundant.meme	MA0076.2	ELK4	BCRCTTCCGGB	11	250	1.96e-05	0.0121	1	JASPAR2018_CORE_vertebrates_non-redundant.meme	MA0076.2	http://jaspar2018.genereg.net/matrix/MA0076.2
69	0	5	JASPAR2018_CORE_vertebrates_non-redundant.meme	MA0463.1	Bcl6	DTTCCTRGAAAGCH	14	157	2.09e-05	0.0129	1	JASPAR2018_CORE_vertebrates_non-redundant.meme	MA0463.1	http://jaspar2018.genereg.net/matrix/MA0463.1
70	0	21	JASPAR2018_CORE_vertebrates_non-redundant.meme	MA0692.1	TFEB	RYCACGTGAC	10	79	2.83e-05	0.0174	1	JASPAR2018_CORE_vertebrates_non-redundant.meme	MA0692.1	http://jaspar2018.genereg.net/matrix/MA0692.1
71	0	17	JASPAR2018_CORE_vertebrates_non-redundant.meme	MA1142.1	FOSL1::JUND	NRTGACTCAT	10	193	3.21e-05	0.0198	1	JASPAR2018_CORE_vertebrates_non-redundant.meme	MA1142.1	http://jaspar2018.genereg.net/matrix/MA1142.1
72	0	17	JASPAR2018_CORE_vertebrates_non-redundant.meme	MA0476.1	FOS	DVTGASTCATB	11	220	3.42e-05	0.0211	1	JASPAR2018_CORE_vertebrates_non-redundant.meme	MA0476.1	http://jaspar2018.genereg.net/matrix/MA0476.1
73	1	24	MEME	TGATGCCATCCARCCATCTC	MEME-17	TGATGCCATCCARCCATCTC	20	10	5.24e-05	0.00035	1	MEME	TGATGCCATCCARCCATCTC
74	1	25	STREME	16-ATGTATTTATT	STREME-16	16-ATGTATTTATT	11	50	0.000161	2.38	1	STREME	16-ATGTATTTATT
75	0	24	STREME	19-TGATGCCATCCAACC	STREME-19	19-TGATGCCATCCAACC	15	41	0.00748	10	1	JASPAR2018_CORE_vertebrates_non-redundant.meme	MA0739.1 (Hic1)	http://jaspar2018.genereg.net/matrix/MA0739.1
76	0	11	STREME	20-TGCATGAAAGTGA	STREME-20	20-TGCATGAAAGTGA	13	36	0.0137	10	1	JASPAR2018_CORE_vertebrates_non-redundant.meme	MA0508.2 (PRDM1)	http://jaspar2018.genereg.net/matrix/MA0508.2
