# Supplementary material for: Ruminant-specific retrotransposons shape regulatory evolution of bovine immunity
Source: HighWire-hosted journal article supplement (doi:10.1101/gr.276241.121), 2022-08-01
Supplement: Supplemental_Table_S6.xlsx [file Supplemental_Table_S6.xlsx]

## Sheet: Description
Supplemental Table S6
All predicted enhancer-gene contacts (ABC score > 0.001) overlapping ATAC-centered, IFNG-inducible (log2FoldChange > 0, FDR < 0) H3K27ac peaks relative to ISGs (log2FoldChange > 0, FDR < 0) transcriptional start sites
Sheets
IFNG-inducible enhancers-genes	Coordinates of ABC-identified enhancers that overlap IFNG-inducible H3K27ac peaks as a function of distance to the nearest ISG TSS
Random genomic enhancers-genes	Coordinates of ABC-identified enhancers that overlap shuffled IFNG-inducible H3K27ac peaks as a function of distance to the nearest ISG TSS
Description of "IFNG-inducible enhancers-genes" columns:
Chr	ABC enhancer chromosome
Start	ABC enhancer start
End	ABC enhancer end
Gene	ISG name
ABC Score	ABC enhancer-gene score
Peak ID	Unique ID for overlapping H3K27ac peaks

## Sheet: IFNG-inducible enhancers-genes
Chr	Start	End	Gene	ABC Score	Peak ID
chr1	936430	936930	IFNAR1	0.001816	region1
chr1	936430	936930	C1H21orf62	0.002192	region1
chr1	936944	937444	C1H21orf62	0.004126	region1
chr1	936944	937444	IFNAR1	0.003418	region1
chr1	999834	1000334	IFNAR2	0.001419	region2
chr1	999834	1000334	IL10RB	0.002746	region2
chr1	999834	1000334	IFNAR1	0.003256	region2
chr1	999834	1000334	C1H21orf62	0.003217	region2
chr1	2217355	2219220	IL10RB	0.059339	region3
chr1	2217355	2219220	IFNAR2	0.013149	region3
chr1	2217355	2219220	C1H21orf62	0.037684	region3
chr1	2217355	2219220	BACH1	0.002855	region3
chr1	2217355	2219220	IFNAR1	0.161849	region3
chr1	2276636	2277136	IFNAR2	0.002647	region4
chr1	2276636	2277136	BACH1	0.004503	region4
chr1	2276636	2277136	IFNAR1	0.005796	region4
chr1	2276636	2277136	C1H21orf62	0.007589	region4
chr1	2276636	2277136	IL10RB	0.012168	region4
chr1	2313648	2314402	IFNAR2	0.003097	region5
chr1	2313648	2314402	IL10RB	0.057534	region5
chr1	2313648	2314402	C1H21orf62	0.008876	region5
chr1	2313648	2314402	IFNAR1	0.015841	region5
chr1	2315472	2316307	IL10RB	0.084431	region6
chr1	2315472	2316307	IFNAR2	0.004545	region6
chr1	2315472	2316307	IFNAR1	0.023246	region6
chr1	2315472	2316307	C1H21orf62	0.013025	region6
chr1	2315472	2316307	BACH1	0.001027	region6
chr1	2342923	2344470	C1H21orf62	0.019133	region7
chr1	2342923	2344470	IL10RB	0.037048	region7
chr1	2342923	2344470	IFNAR1	0.041986	region7
chr1	2342923	2344470	IFNAR2	0.204484	region7
chr1	2342923	2344470	BACH1	0.00445	region7
chr1	2346580	2347280	IL10RB	0.006428	region8
chr1	2346580	2347280	C1H21orf62	0.00332	region8
chr1	2346580	2347280	IFNAR2	0.035478	region8
chr1	2346580	2347280	IFNAR1	0.007285	region8
chr1	2348653	2349372	C1H21orf62	0.005254	region9
chr1	2348653	2349372	IFNAR2	0.056152	region9
chr1	2348653	2349372	BACH1	0.001223	region9
chr1	2348653	2349372	IFNAR1	0.011529	region9
chr1	2348653	2349372	IL10RB	0.010173	region9
chr1	2349476	2350393	IFNAR2	0.048594	region9
chr1	2349476	2350393	BACH1	0.001059	region9
chr1	2349476	2350393	IL10RB	0.008804	region9
chr1	2349476	2350393	C1H21orf62	0.004547	region9
chr1	2349476	2350393	IFNAR1	0.009978	region9
chr1	2367095	2367595	IFNAR2	0.031277	region10
chr1	2367095	2367595	IFNAR1	0.013411	region10
chr1	2367095	2367595	C1H21orf62	0.017441	region10
chr1	2367095	2367595	IL10RB	0.018315	region10
chr1	2368574	2370319	IFNAR2	0.326096	region11
chr1	2368574	2370319	BACH1	0.007131	region11
chr1	2368574	2370319	C1H21orf62	0.181837	region11
chr1	2368574	2370319	IL10RB	0.190956	region11
chr1	2368574	2370319	IFNAR1	0.139828	region11
chr1	6848880	6849380	BACH1	0.053171	region12
chr1	6848880	6849380	C1H21orf62	0.001601	region12
chr1	6848880	6849380	IFNAR1	0.001064	region12
chr1	6848880	6849380	ADAMTS1	0.004009	region12
chr1	6849717	6850217	BACH1	0.032135	region13
chr1	6849717	6850217	ADAMTS1	0.002424	region13
chr1	6851959	6852459	BACH1	0.032815	region14
chr1	6851959	6852459	ADAMTS1	0.002477	region14
chr1	6856000	6856500	ADAMTS1	0.003155	region15
chr1	6856000	6856500	BACH1	0.041753	region15
chr1	6856000	6856500	C1H21orf62	0.001256	region15
chr1	6857721	6859457	IL10RB	0.001226	region16
chr1	6857721	6859457	C1H21orf62	0.002011	region16
chr1	6857721	6859457	ADAMTS1	0.00506	region16
chr1	6857721	6859457	BACH1	0.066897	region16
chr1	6857721	6859457	IFNAR1	0.001337	region16
chr1	6867650	6868150	BACH1	0.012889	region17
chr1	6960499	6960999	BACH1	0.006296	region18
chr1	6960499	6960999	ADAMTS1	0.006424	region18
chr1	6961091	6961591	BACH1	0.006065	region18
chr1	6961091	6961591	ADAMTS1	0.006188	region18
chr1	6968454	6969265	IFNAR1	0.001327	region19
chr1	6968454	6969265	C1H21orf62	0.001991	region19
chr1	6968454	6969265	BACH1	0.02301	region19
chr1	6968454	6969265	IL10RB	0.001217	region19
chr1	6968454	6969265	ADAMTS1	0.023491	region19
chr1	6995883	6996383	C1H21orf62	0.001153	region20
chr1	6995883	6996383	BACH1	0.015559	region20
chr1	6995883	6996383	ADAMTS1	0.003123	region20
chr1	7861456	7861956	ADAMTS1	0.007342	region21
chr1	7862328	7862828	BACH1	0.002185	region22
chr1	7862328	7862828	ADAMTS1	0.01826	region22
chr1	7951603	7952408	BACH1	0.014841	region23
chr1	7951603	7952408	ADAMTS1	0.027778	region23
chr1	7971198	7971698	ADAMTS1	0.012232	region25
chr1	7971198	7971698	BACH1	0.002408	region25
chr1	8048903	8049403	BACH1	0.001168	region26
chr1	8048903	8049403	ADAMTS1	0.00191	region26
chr1	8158147	8158647	ADAMTS1	0.029351	region27
chr1	8158147	8158647	BACH1	0.002587	region27
chr1	8220787	8221626	BACH1	0.003535	region28
chr1	8220787	8221626	ADAMTS1	0.027023	region28
chr1	8233879	8234379	ADAMTS1	0.005224	region29
chr1	8345121	8345621	BACH1	0.001233	region30
chr1	8345121	8345621	ADAMTS1	0.00939	region30
chr1	8347481	8347981	BACH1	0.001381	region31
chr1	8347481	8347981	ADAMTS1	0.010539	region31
chr1	10382961	10383461	ADAMTS1	0.002397	region32
chr1	10405401	10406688	ADAMTS1	0.004154	region33
chr1	10405401	10406688	ADAMTS1	0.004154	region34
chr1	10429947	10431521	ADAMTS1	0.019465	region35
chr1	10429947	10431521	BACH1	0.003153	region35
chr1	10508203	10509139	BACH1	0.001771	region36
chr1	10508203	10509139	ADAMTS1	0.011144	region36
chr1	10575834	10576334	ADAMTS1	0.004643	region37
chr1	10651618	10652118	ADAMTS1	0.004866	region38
chr1	10652389	10652889	ADAMTS1	0.003208	region39
chr1	10848381	10848881	ADAMTS1	0.005405	region40
chr1	10859858	10860874	ADAMTS1	0.016647	region41
chr1	10859858	10860874	BACH1	0.001119	region41
chr1	10860988	10861488	ADAMTS1	0.010535	region41
chr1	19550351	19551353	C1H21orf91	0.055117	region42
chr1	19550351	19551353	USP25	0.00898	region42
chr1	21924786	21926057	USP25	0.014403	region44
chr1	21924786	21926057	USP25	0.014403	region43
chr1	21924786	21926057	C1H21orf91	0.010815	region43
chr1	21924786	21926057	C1H21orf91	0.010815	region44
chr1	22022919	22023850	USP25	0.008497	region45
chr1	22022919	22023850	C1H21orf91	0.025052	region45
chr1	22092737	22094158	USP25	0.088217	region46
chr1	22092737	22094158	C1H21orf91	0.012502	region46
chr1	22094477	22094977	C1H21orf91	0.002124	region46
chr1	22094477	22094977	USP25	0.014993	region46
chr1	22099949	22100449	USP25	0.012762	region47
chr1	22099949	22100449	C1H21orf91	0.009074	region47
chr1	22103226	22103726	USP25	0.005073	region48
chr1	22103226	22103726	C1H21orf91	0.003603	region48
chr1	35095906	35096406	CGGBP1	0.010065	region49
chr1	36079446	36079946	CGGBP1	0.073476	region50
chr1	38359571	38360753	CGGBP1	0.062122	region51
chr1	38690509	38691009	CGGBP1	0.005128	region53
chr1	38691237	38691737	DCBLD2	0.001028	region53
chr1	38691237	38691737	CGGBP1	0.007714	region53
chr1	38698902	38699402	CGGBP1	0.00235	region54
chr1	43127187	43127687	DCBLD2	0.002505	region55
chr1	43168353	43168853	DCBLD2	0.002538	region56
chr1	43168353	43168853	LOC524181	0.003136	region56
chr1	43177970	43178888	DCBLD2	0.11243	region57
chr1	43177970	43178888	LOC524181	0.003961	region57
chr1	43184914	43185414	LOC524181	0.001984	region58
chr1	43184914	43185414	DCBLD2	0.05619	region58
chr1	43185768	43186268	LOC524181	0.002184	region59
chr1	43185768	43186268	DCBLD2	0.061829	region59
chr1	43194413	43195695	LOC524181	0.003508	region61
chr1	43194413	43195695	DCBLD2	0.099061	region61
chr1	43218351	43218851	LOC524181	0.003725	region62
chr1	43218351	43218851	DCBLD2	0.030479	region62
chr1	43219287	43219787	LOC524181	0.001675	region63
chr1	43219287	43219787	DCBLD2	0.013702	region63
chr1	43219798	43220298	LOC524181	0.001519	region63
chr1	43219798	43220298	DCBLD2	0.01242	region63
chr1	44439848	44440348	LOC524181	0.002515	region67
chr1	44439848	44440348	DCBLD2	0.001504	region67
chr1	44512938	44513438	LOC524181	0.006462	region69
chr1	44512938	44513438	DCBLD2	0.001184	region69
chr1	46431203	46431823	LOC524181	0.002565	region71
chr1	46431203	46431823	ALCAM	0.00104	region71
chr1	46560785	46561996	DCBLD2	0.001962	region72
chr1	46560785	46561996	LOC524181	0.011236	region72
chr1	46560785	46561996	LOC524181	0.011236	region73
chr1	46560785	46561996	ALCAM	0.00471	region72
chr1	46560785	46561996	ALCAM	0.00471	region73
chr1	46560785	46561996	DCBLD2	0.001962	region73
chr1	49340077	49340944	LOC112447294	0.007306	region74
chr1	49340077	49340944	ALCAM	0.02238	region74
chr1	49340077	49340944	CD47	0.006658	region74
chr1	49340077	49340944	LOC524181	0.002125	region74
chr1	49405972	49406472	ALCAM	0.005896	region75
chr1	49405972	49406472	LOC112447294	0.001358	region75
chr1	49405972	49406472	LOC524181	0.001667	region75
chr1	49405972	49406472	CD47	0.001228	region75
chr1	51801427	51802166	LOC112447294	0.006902	region76
chr1	51801427	51802166	NECTIN3	0.001275	region76
chr1	51801427	51802166	CD47	0.006327	region76
chr1	51801427	51802166	ALCAM	0.00266	region76
chr1	51802456	51802956	CD47	0.003582	region77
chr1	51802456	51802956	LOC112447294	0.003907	region77
chr1	51802456	51802956	ALCAM	0.001505	region77
chr1	51804562	51805062	LOC112447294	0.004525	region78
chr1	51804562	51805062	CD47	0.004147	region78
chr1	51804562	51805062	ALCAM	0.001741	region78
chr1	51944358	51944858	ALCAM	0.001473	region79
chr1	51944358	51944858	CD47	0.001625	region79
chr1	51944358	51944858	LOC112447294	0.001764	region79
chr1	52022353	52023836	LOC112447294	0.004289	region80
chr1	52022353	52023836	ALCAM	0.003465	region80
chr1	52022353	52023836	CD47	0.00395	region80
chr1	52022353	52023836	NECTIN3	0.001921	region80
chr1	52023937	52025210	ALCAM	0.005464	region81
chr1	52023937	52025210	NECTIN3	0.003033	region81
chr1	52023937	52025210	CD47	0.006234	region81
chr1	52023937	52025210	PLCXD2	0.001239	region81
chr1	52023937	52025210	LOC112447294	0.006768	region81
chr1	52566909	52567409	LOC112447294	0.002812	region82
chr1	52566909	52567409	CD47	0.003638	region82
chr1	52567805	52568630	ALCAM	0.002684	region83
chr1	52567805	52568630	LOC112447294	0.02396	region83
chr1	52567805	52568630	NECTIN3	0.002078	region83
chr1	52567805	52568630	CD47	0.030998	region83
chr1	52577956	52578456	LOC112447294	0.019476	region84
chr1	52577956	52578456	CD47	0.008683	region84
chr1	52577956	52578456	NECTIN3	0.001447	region84
chr1	52577956	52578456	ALCAM	0.001858	region84
chr1	52595011	52595511	ALCAM	0.001289	region85
chr1	52595011	52595511	CD47	0.009501	region85
chr1	52595011	52595511	LOC112447294	0.010387	region85
chr1	52595011	52595511	NECTIN3	0.001014	region85
chr1	52640908	52641676	NECTIN3	0.002109	region86
chr1	52640908	52641676	LOC112447294	0.038848	region86
chr1	52640908	52641676	ALCAM	0.008398	region86
chr1	52640908	52641676	CD47	0.023591	region86
chr1	52643927	52644427	CD47	0.004948	region87
chr1	52643927	52644427	LOC112447294	0.008148	region87
chr1	52643927	52644427	ALCAM	0.001761	region87
chr1	52650428	52651385	CD47	0.075854	region88
chr1	52650428	52651385	NECTIN3	0.01035	region88
chr1	52650428	52651385	PLCXD2	0.004142	region88
chr1	52650428	52651385	ALCAM	0.012734	region88
chr1	52650428	52651385	LOC112447294	0.124947	region88
chr1	52670544	52671464	LOC112447294	0.021321	region89
chr1	52670544	52671464	ALCAM	0.002528	region89
chr1	52670544	52671464	NECTIN3	0.002079	region89
chr1	52670544	52671464	CD47	0.03536	region89
chr1	52679861	52680361	CD47	0.007523	region90
chr1	52679861	52680361	LOC112447294	0.030716	region90
chr1	52680579	52681079	LOC112447294	0.021339	region91
chr1	52680579	52681079	CD47	0.005226	region91
chr1	52755865	52756365	CD47	0.03345	region92
chr1	52755865	52756365	ALCAM	0.001119	region92
chr1	52755865	52756365	LOC112447294	0.019206	region92
chr1	52777035	52777976	ALCAM	0.003946	region93
chr1	52777035	52777976	LOC112447294	0.067148	region93
chr1	52777035	52777976	PLCXD2	0.001376	region93
chr1	52777035	52777976	NECTIN3	0.003455	region93
chr1	52777035	52777976	CD47	0.130155	region93
chr1	52890559	52891365	CD47	0.005914	region94
chr1	52890559	52891365	NECTIN3	0.001427	region94
chr1	52890559	52891365	ALCAM	0.001525	region94
chr1	52890559	52891365	LOC112447294	0.002554	region94
chr1	53070069	53070569	NECTIN3	0.001792	region95
chr1	53070069	53070569	ALCAM	0.001726	region95
chr1	53070069	53070569	LOC112447294	0.003041	region95
chr1	53070069	53070569	CD47	0.008592	region95
chr1	53140204	53140704	CD47	0.004515	region96
chr1	53140204	53140704	ALCAM	0.001266	region96
chr1	53140204	53140704	NECTIN3	0.001371	region96
chr1	53140204	53140704	LOC112447294	0.004925	region96
chr1	53211413	53211913	CD47	0.007403	region97
chr1	53211413	53211913	LOC112447294	0.005161	region97
chr1	53211413	53211913	ALCAM	0.001221	region97
chr1	53211413	53211913	NECTIN3	0.001378	region97
chr1	53212458	53212958	ALCAM	0.001741	region98
chr1	53212458	53212958	LOC112447294	0.00736	region98
chr1	53212458	53212958	NECTIN3	0.001966	region98
chr1	53212458	53212958	CD47	0.010557	region98
chr1	55590146	55590980	ZDHHC23	0.001236	region99
chr1	55590146	55590980	PLCXD2	0.001335	region99
chr1	55590146	55590980	NECTIN3	0.008247	region99
chr1	55916979	55917479	QTRT2	0.001003	region100
chr1	55916979	55917479	NECTIN3	0.034458	region100
chr1	55916979	55917479	ZDHHC23	0.001275	region100
chr1	55916979	55917479	PLCXD2	0.001248	region100
chr1	56423610	56424390	NECTIN3	0.011364	region101
chr1	56423610	56424390	ZDHHC23	0.006357	region101
chr1	56423610	56424390	LOC112447294	0.002494	region101
chr1	56423610	56424390	CD47	0.002336	region101
chr1	56423610	56424390	QTRT2	0.004957	region101
chr1	56423610	56424390	GRAMD1C	0.004061	region101
chr1	56423610	56424390	PLCXD2	0.091047	region101
chr1	56424575	56425707	LOC112447294	0.003826	region101
chr1	56424575	56425707	CD47	0.003583	region101
chr1	56424575	56425707	NECTIN3	0.017434	region101
chr1	56424575	56425707	QTRT2	0.007608	region101
chr1	56424575	56425707	GRAMD1C	0.006233	region101
chr1	56424575	56425707	ZDHHC23	0.009758	region101
chr1	56424575	56425707	PLCXD2	0.13968	region101
chr1	56427219	56427839	GRAMD1C	0.001316	region102
chr1	56427219	56427839	ZDHHC23	0.002059	region102
chr1	56427219	56427839	PLCXD2	0.02945	region102
chr1	56427219	56427839	QTRT2	0.001605	region102
chr1	56427219	56427839	NECTIN3	0.003676	region102
chr1	56572567	56573067	CD47	0.001541	region103
chr1	56572567	56573067	LOC112447294	0.001646	region103
chr1	56572567	56573067	ZDHHC23	0.004616	region103
chr1	56572567	56573067	NECTIN3	0.007762	region103
chr1	56572567	56573067	GRAMD1C	0.002957	region103
chr1	56572567	56573067	QTRT2	0.003587	region103
chr1	56572567	56573067	PLCXD2	0.012123	region103
chr1	56629334	56629834	PLCXD2	0.0015	region104
chr1	56629334	56629834	NECTIN3	0.003655	region104
chr1	56632028	56632528	NECTIN3	0.003592	region105
chr1	56632028	56632528	PLCXD2	0.001474	region105
chr1	56943346	56944713	QTRT2	0.001768	region106
chr1	56943346	56944713	NECTIN3	0.00311	region106
chr1	56943346	56944713	GRAMD1C	0.001487	region106
chr1	56943346	56944713	PLCXD2	0.003809	region106
chr1	56943346	56944713	ZDHHC23	0.002298	region106
chr1	56944733	56945233	ZDHHC23	0.001608	region106
chr1	56944733	56945233	PLCXD2	0.002664	region106
chr1	56944733	56945233	QTRT2	0.001237	region106
chr1	56944733	56945233	NECTIN3	0.002173	region106
chr1	56944733	56945233	GRAMD1C	0.001041	region106
chr1	57074919	57075419	LOC112447294	0.001023	region107
chr1	57074919	57075419	ZDHHC23	0.004074	region107
chr1	57074919	57075419	PLCXD2	0.006255	region107
chr1	57074919	57075419	NECTIN3	0.004636	region107
chr1	57074919	57075419	QTRT2	0.003119	region107
chr1	57074919	57075419	GRAMD1C	0.002649	region107
chr1	57075628	57076865	GRAMD1C	0.006507	region108
chr1	57075628	57076865	QTRT2	0.007661	region108
chr1	57075628	57076865	ZDHHC23	0.010007	region108
chr1	57075628	57076865	NECTIN3	0.011374	region108
chr1	57075628	57076865	CD47	0.002345	region108
chr1	57075628	57076865	PLCXD2	0.015358	region108
chr1	57075628	57076865	LOC112447294	0.00251	region108
chr1	57452523	57453023	GRAMD1C	0.001413	region109
chr1	57452523	57453023	NECTIN3	0.001492	region109
chr1	57452523	57453023	PLCXD2	0.002546	region109
chr1	57452523	57453023	ZDHHC23	0.00213	region109
chr1	57452523	57453023	QTRT2	0.001599	region109
chr1	57453256	57453756	NECTIN3	0.001117	region110
chr1	57453256	57453756	ZDHHC23	0.001596	region110
chr1	57453256	57453756	PLCXD2	0.001906	region110
chr1	57453256	57453756	QTRT2	0.001198	region110
chr1	57453256	57453756	GRAMD1C	0.001059	region110
chr1	57472867	57473631	CD47	0.004745	region111
chr1	57472867	57473631	QTRT2	0.003924	region111
chr1	57472867	57473631	NECTIN3	0.003569	region111
chr1	57472867	57473631	GRAMD1C	0.003476	region111
chr1	57472867	57473631	PLCXD2	0.00233	region111
chr1	57472867	57473631	ZDHHC23	0.005233	region111
chr1	58256532	58257750	GRAMD1C	0.008743	region112
chr1	58256532	58257750	ZDHHC23	0.014254	region112
chr1	58256532	58257750	PLCXD2	0.003469	region112
chr1	58256532	58257750	NECTIN3	0.006083	region112
chr1	58256532	58257750	QTRT2	0.011624	region112
chr1	58416106	58416606	ZDHHC23	0.015935	region113
chr1	58416106	58416606	NECTIN3	0.001538	region113
chr1	58416106	58416606	GRAMD1C	0.013732	region113
chr1	58416106	58416606	QTRT2	0.012487	region113
chr1	58457446	58457946	GRAMD1C	0.002039	region114
chr1	58457446	58457946	NECTIN3	0.001322	region114
chr1	58457446	58457946	QTRT2	0.002711	region114
chr1	58457446	58457946	ZDHHC23	0.0099	region114
chr1	58457446	58457946	PLCXD2	0.00518	region114
chr1	58542365	58542865	GRAMD1C	0.007821	region116
chr1	58542365	58542865	ZDHHC23	0.009694	region116
chr1	58542365	58542865	QTRT2	0.007552	region116
chr1	58542962	58543462	QTRT2	0.008128	region117
chr1	58542962	58543462	GRAMD1C	0.008418	region117
chr1	58542962	58543462	ZDHHC23	0.010434	region117
chr1	58651126	58651626	ZDHHC23	0.025031	region118
chr1	58651126	58651626	NECTIN3	0.003206	region118
chr1	58651126	58651626	GRAMD1C	0.015571	region118
chr1	58651126	58651626	PLCXD2	0.001765	region118
chr1	58651126	58651626	QTRT2	0.019724	region118
chr1	58809767	58810267	ZDHHC23	0.002267	region119
chr1	58809767	58810267	QTRT2	0.005225	region119
chr1	58809767	58810267	GRAMD1C	0.00139	region119
chr1	59037096	59037596	GRAMD1C	0.00121	region120
chr1	59037096	59037596	ZDHHC23	0.001973	region120
chr1	59037096	59037596	QTRT2	0.001609	region120
chr1	59047670	59048170	ZDHHC23	0.004948	region121
chr1	59047670	59048170	NECTIN3	0.001643	region121
chr1	59047670	59048170	PLCXD2	0.003359	region121
chr1	59047670	59048170	GRAMD1C	0.003035	region121
chr1	59047670	59048170	QTRT2	0.015386	region121
chr1	61877315	61877815	GPR156	0.004241	region122
chr1	61877315	61877815	B4GALT4	0.001635	region122
chr1	64803493	64803993	GSK3B	0.009575	region125
chr1	64803493	64803993	GPR156	0.001328	region125
chr1	64803493	64803993	GOLGB1	0.001438	region126
chr1	64803493	64803993	GPR156	0.001328	region126
chr1	64803493	64803993	B4GALT4	0.001989	region125
chr1	64803493	64803993	B4GALT4	0.001989	region126
chr1	64803493	64803993	GOLGB1	0.001438	region125
chr1	64803493	64803993	GSK3B	0.009575	region126
chr1	64803493	64803993	FSTL1	0.001192	region126
chr1	64803493	64803993	FSTL1	0.001192	region125
chr1	64803493	64803993	LRRC58	0.003137	region125
chr1	64803493	64803993	LRRC58	0.003137	region126
chr1	64804095	64804595	GSK3B	0.009133	region126
chr1	64804095	64804595	LRRC58	0.002992	region126
chr1	64804095	64804595	FSTL1	0.001137	region126
chr1	64804095	64804595	B4GALT4	0.001897	region126
chr1	64804095	64804595	GPR156	0.001266	region126
chr1	64804095	64804595	GOLGB1	0.001372	region126
chr1	64892899	64893399	DTX3L	0.002506	region127
chr1	64892899	64893399	GPR156	0.01194	region127
chr1	64892899	64893399	PARP9	0.002506	region127
chr1	64892899	64893399	B4GALT4	0.017062	region127
chr1	64892899	64893399	GSK3B	0.026033	region127
chr1	64892899	64893399	PARP14	0.017412	region127
chr1	64892899	64893399	FSTL1	0.017108	region127
chr1	64892899	64893399	GOLGB1	0.016323	region127
chr1	64892899	64893399	LRRC58	0.010274	region127
chr1	64894004	64894504	FSTL1	0.021406	region128
chr1	64894004	64894504	PARP9	0.003137	region128
chr1	64894004	64894504	DTX3L	0.003137	region128
chr1	64894004	64894504	GOLGB1	0.020427	region128
chr1	64894004	64894504	LRRC58	0.012854	region128
chr1	64894004	64894504	UMPS	0.001201	region128
chr1	64894004	64894504	PARP14	0.021788	region128
chr1	64894004	64894504	GPR156	0.01494	region128
chr1	64894004	64894504	B4GALT4	0.021348	region128
chr1	64894004	64894504	GSK3B	0.032573	region128
chr1	65032447	65032947	UMPS	0.001247	region129
chr1	65032447	65032947	FSTL1	0.013479	region129
chr1	65032447	65032947	GOLGB1	0.006817	region129
chr1	65032447	65032947	SNX4	0.00124	region129
chr1	65032447	65032947	B4GALT4	0.008093	region129
chr1	65032447	65032947	DTX3L	0.003357	region129
chr1	65032447	65032947	LRRC58	0.038525	region129
chr1	65032447	65032947	GPR156	0.115021	region129
chr1	65032447	65032947	GSK3B	0.019352	region129
chr1	65032447	65032947	PARP14	0.003263	region129
chr1	65032447	65032947	PARP9	0.003357	region129
chr1	65070345	65071592	GOLGB1	0.006668	region131
chr1	65070345	65071592	SNX4	0.001187	region131
chr1	65070345	65071592	B4GALT4	0.033756	region131
chr1	65070345	65071592	GSK3B	0.004743	region131
chr1	65070345	65071592	UMPS	0.001195	region131
chr1	65070345	65071592	PARP14	0.003156	region131
chr1	65070345	65071592	FSTL1	0.004612	region131
chr1	65070345	65071592	PARP9	0.013454	region131
chr1	65070345	65071592	DTX3L	0.013455	region131
chr1	65070345	65071592	GPR156	0.089942	region131
chr1	65070345	65071592	LRRC58	0.092289	region131
chr1	65930578	65931078	FSTL1	0.002048	region132
chr1	65930578	65931078	GOLGB1	0.001206	region132
chr1	66173261	66173761	FSTL1	0.001934	region133
chr1	66173261	66173761	B4GALT4	0.001676	region133
chr1	66173261	66173761	SNX4	0.003604	region133
chr1	66173261	66173761	LRRC58	0.001787	region133
chr1	66173261	66173761	GPR156	0.001941	region133
chr1	66173261	66173761	GSK3B	0.004004	region133
chr1	66173261	66173761	GOLGB1	0.008202	region133
chr1	66173261	66173761	PARP14	0.002356	region133
chr1	66173261	66173761	DTX3L	0.002399	region133
chr1	66173261	66173761	PARP9	0.002399	region133
chr1	66987098	66987598	B4GALT4	0.004822	region134
chr1	66987098	66987598	DTX3L	0.055038	region134
chr1	66987098	66987598	GOLGB1	0.002358	region134
chr1	66987098	66987598	PARP9	0.055037	region134
chr1	66987098	66987598	PARP14	0.020863	region134
chr1	66987930	66988430	B4GALT4	0.008881	region134
chr1	66987930	66988430	PARP14	0.038427	region134
chr1	66987930	66988430	PARP9	0.101371	region134
chr1	66987930	66988430	DTX3L	0.101372	region134
chr1	66987930	66988430	LRRC58	0.0015	region134
chr1	66987930	66988430	UMPS	0.001198	region134
chr1	66987930	66988430	GPR156	0.001656	region134
chr1	66987930	66988430	SNX4	0.001053	region134
chr1	66987930	66988430	GOLGB1	0.004343	region134
chr1	66987930	66988430	FSTL1	0.001596	region134
chr1	66987930	66988430	GSK3B	0.001413	region134
chr1	68001967	68002773	PCYT1A	0.001634	region135
chr1	68001967	68002773	UBXN7	0.001209	region135
chr1	68001967	68002773	UMPS	0.003297	region135
chr1	68001967	68002773	LRRC58	0.001625	region135
chr1	68001967	68002773	SENP5	0.001116	region135
chr1	68001967	68002773	GOLGB1	0.004149	region135
chr1	68001967	68002773	FSTL1	0.0017	region135
chr1	68001967	68002773	LRCH3	0.008574	region135
chr1	68001967	68002773	GSK3B	0.001584	region135
chr1	68001967	68002773	PARP9	0.00511	region135
chr1	68001967	68002773	DTX3L	0.00511	region135
chr1	68001967	68002773	SNX4	0.002387	region135
chr1	68001967	68002773	PARP14	0.00508	region135
chr1	68001967	68002773	GPR156	0.001808	region135
chr1	68001967	68002773	B4GALT4	0.002104	region135
chr1	68002820	68003320	UMPS	0.001589	region135
chr1	68002820	68003320	GOLGB1	0.001998	region135
chr1	68002820	68003320	PARP9	0.00246	region135
chr1	68002820	68003320	DTX3L	0.00246	region135
chr1	68002820	68003320	SNX4	0.001151	region135
chr1	68002820	68003320	PARP14	0.002447	region135
chr1	68002820	68003320	LRCH3	0.004131	region135
chr1	68002820	68003320	B4GALT4	0.001014	region135
chr1	68253577	68254077	DTX3L	0.001321	region136
chr1	68253577	68254077	PARP9	0.001321	region136
chr1	68253577	68254077	PARP14	0.001319	region136
chr1	68253577	68254077	GOLGB1	0.004981	region136
chr1	68253577	68254077	UMPS	0.001146	region136
chr1	68253577	68254077	PCYT1A	0.003315	region136
chr1	69127567	69128067	PARP14	0.005061	region137
chr1	69127567	69128067	GOLGB1	0.001247	region137
chr1	69127567	69128067	PCYT1A	0.005389	region137
chr1	69127567	69128067	SNX4	0.005433	region137
chr1	69127567	69128067	LRCH3	0.005463	region137
chr1	69127567	69128067	UBXN7	0.003703	region137
chr1	69127567	69128067	PARP9	0.001229	region137
chr1	69127567	69128067	DTX3L	0.001229	region137
chr1	69127567	69128067	UMPS	0.05309	region137
chr1	69127567	69128067	SENP5	0.003379	region137
chr1	69129503	69130003	LRCH3	0.00286	region138
chr1	69129503	69130003	UBXN7	0.001939	region138
chr1	69129503	69130003	PCYT1A	0.002822	region138
chr1	69129503	69130003	PARP14	0.002649	region138
chr1	69129503	69130003	SENP5	0.001769	region138
chr1	69129503	69130003	UMPS	0.02779	region138
chr1	69129503	69130003	SNX4	0.002844	region138
chr1	70362530	70363277	SENP5	0.002014	region139
chr1	70362530	70363277	LRCH3	0.056068	region139
chr1	70362530	70363277	UMPS	0.001914	region139
chr1	70362530	70363277	GOLGB1	0.001252	region139
chr1	70362530	70363277	PCYT1A	0.002579	region139
chr1	70362530	70363277	SNX4	0.00268	region139
chr1	70362530	70363277	PARP14	0.001117	region139
chr1	70362530	70363277	PARP9	0.00113	region139
chr1	70362530	70363277	DTX3L	0.00113	region139
chr1	70362530	70363277	UBXN7	0.00197	region139
chr1	70542174	70542674	LRCH3	0.005628	region140
chr1	70542174	70542674	PCYT1A	0.002045	region140
chr1	70542174	70542674	SNX4	0.002125	region140
chr1	70542174	70542674	UMPS	0.001349	region140
chr1	70542174	70542674	SENP5	0.001597	region140
chr1	70542174	70542674	UBXN7	0.004274	region140
chr1	70544081	70544981	UMPS	0.007769	region141
chr1	70544081	70544981	PARP14	0.004878	region141
chr1	70544081	70544981	PCYT1A	0.011793	region141
chr1	70544081	70544981	SNX4	0.012256	region141
chr1	70544081	70544981	ATP13A3	0.003033	region141
chr1	70544081	70544981	GOLGB1	0.005514	region141
chr1	70544081	70544981	LRCH3	0.032459	region141
chr1	70544081	70544981	UBXN7	0.024649	region141
chr1	70544081	70544981	PARP9	0.004938	region141
chr1	70544081	70544981	SENP5	0.009208	region141
chr1	70544081	70544981	DTX3L	0.004938	region141
chr1	70960950	70961911	UBXN7	0.010327	region142
chr1	70960950	70961911	PCYT1A	0.002149	region142
chr1	70960950	70961911	UMPS	0.001131	region142
chr1	70960950	70961911	SNX4	0.007473	region142
chr1	70960950	70961911	LRCH3	0.001846	region142
chr1	70960950	70961911	SENP5	0.001678	region142
chr1	71091247	71092031	LRCH3	0.003127	region143
chr1	71091247	71092031	UMPS	0.001806	region143
chr1	71091247	71092031	PARP9	0.001346	region143
chr1	71091247	71092031	ATP13A3	0.00116	region143
chr1	71091247	71092031	GOLGB1	0.001535	region143
chr1	71091247	71092031	SENP5	0.013087	region143
chr1	71091247	71092031	PARP14	0.001329	region143
chr1	71091247	71092031	UBXN7	0.024952	region143
chr1	71091247	71092031	DTX3L	0.001346	region143
chr1	71091247	71092031	SNX4	0.010086	region143
chr1	71091247	71092031	PCYT1A	0.011831	region143
chr1	71289309	71290218	ATP13A3	0.001219	region144
chr1	71289309	71290218	PCYT1A	0.003486	region144
chr1	71289309	71290218	UMPS	0.00159	region144
chr1	71289309	71290218	SNX4	0.002803	region144
chr1	71289309	71290218	UBXN7	0.00879	region144
chr1	71289309	71290218	SENP5	0.008384	region144
chr1	71289309	71290218	PARP9	0.010348	region144
chr1	71289309	71290218	PARP14	0.001221	region144
chr1	71289309	71290218	LRCH3	0.002994	region144
chr1	71289309	71290218	DTX3L	0.010348	region144
chr1	71355585	71356085	PARP14	0.002081	region145
chr1	71355585	71356085	UMPS	0.012323	region145
chr1	71355585	71356085	UBXN7	0.022028	region145
chr1	71355585	71356085	ATP13A3	0.002178	region145
chr1	71355585	71356085	SNX4	0.015213	region145
chr1	71355585	71356085	PCYT1A	0.006023	region145
chr1	71355585	71356085	PARP9	0.002109	region145
chr1	71355585	71356085	LRCH3	0.005082	region145
chr1	71355585	71356085	SENP5	0.125544	region145
chr1	71355585	71356085	DTX3L	0.002109	region145
chr1	71392108	71393054	SENP5	0.01766	region146
chr1	71392108	71393054	PCYT1A	0.001197	region146
chr1	71392108	71393054	LRCH3	0.00744	region146
chr1	71911156	71911656	ATP13A3	0.001388	region147
chr1	71911156	71911656	UBXN7	0.006311	region147
chr1	71911156	71911656	SNX4	0.001568	region147
chr1	71911156	71911656	SENP5	0.00212	region147
chr1	71911156	71911656	LRCH3	0.00157	region147
chr1	71911156	71911656	PCYT1A	0.008898	region147
chr1	71913228	71913728	ATP13A3	0.001114	region148
chr1	71913228	71913728	UBXN7	0.005055	region148
chr1	71913228	71913728	SENP5	0.001699	region148
chr1	71913228	71913728	PCYT1A	0.007124	region148
chr1	71913228	71913728	LRCH3	0.001256	region148
chr1	71913228	71913728	SNX4	0.001255	region148
chr1	72358393	72358962	UMPS	0.001334	region150
chr1	72358393	72358962	CLDN1	0.001042	region150
chr1	72358393	72358962	SNX4	0.002004	region150
chr1	72358393	72358962	ATP13A3	0.005504	region150
chr1	72358393	72358962	PCYT1A	0.002948	region150
chr1	72358393	72358962	SENP5	0.003231	region150
chr1	72358393	72358962	LRCH3	0.00193	region150
chr1	72358393	72358962	UBXN7	0.002408	region150
chr1	72640256	72640942	ATP13A3	0.002091	region151
chr1	72959654	72960154	PCYT1A	0.001823	region152
chr1	72959654	72960154	SNX4	0.006584	region152
chr1	72959654	72960154	UBXN7	0.00146	region152
chr1	72959654	72960154	SENP5	0.005756	region152
chr1	72959654	72960154	LRCH3	0.00128	region152
chr1	72959654	72960154	ATP13A3	0.012837	region152
chr1	72961905	72962405	ATP13A3	0.006344	region153
chr1	72961905	72962405	SENP5	0.001096	region153
chr1	72961905	72962405	PCYT1A	0.001119	region153
chr1	72963293	72964010	LRCH3	0.003329	region154
chr1	72963293	72964010	SENP5	0.004642	region154
chr1	72963293	72964010	ATP13A3	0.026904	region154
chr1	72963293	72964010	UMPS	0.002489	region154
chr1	72963293	72964010	UBXN7	0.003796	region154
chr1	72963293	72964010	CLDN1	0.002552	region154
chr1	72963293	72964010	PCYT1A	0.00474	region154
chr1	72963293	72964010	SNX4	0.003573	region154
chr1	72976298	72977103	SENP5	0.004304	region155
chr1	72976298	72977103	SNX4	0.003324	region155
chr1	72976298	72977103	PCYT1A	0.004402	region155
chr1	72976298	72977103	UBXN7	0.003524	region155
chr1	72976298	72977103	UMPS	0.002317	region155
chr1	72976298	72977103	LRCH3	0.003095	region155
chr1	72976298	72977103	ATP13A3	0.020364	region155
chr1	72976298	72977103	CLDN1	0.002389	region155
chr1	72977897	72978397	UMPS	0.001503	region156
chr1	72977897	72978397	SENP5	0.00279	region156
chr1	72977897	72978397	SNX4	0.002155	region156
chr1	72977897	72978397	ATP13A3	0.013211	region156
chr1	72977897	72978397	LRCH3	0.002007	region156
chr1	72977897	72978397	UBXN7	0.002284	region156
chr1	72977897	72978397	CLDN1	0.00155	region156
chr1	72977897	72978397	PCYT1A	0.002854	region156
chr1	73070237	73071027	UBXN7	0.002314	region157
chr1	73070237	73071027	LRCH3	0.018177	region157
chr1	73070237	73071027	PCYT1A	0.002896	region157
chr1	73070237	73071027	CLDN1	0.001667	region157
chr1	73070237	73071027	ATP13A3	0.046115	region157
chr1	73070237	73071027	SENP5	0.002801	region157
chr1	73070237	73071027	SNX4	0.002212	region157
chr1	73070237	73071027	UMPS	0.001551	region157
chr1	76884630	76885130	CLDN1	0.001451	region158
chr1	76885329	76885829	CLDN1	0.005965	region159
chr1	77025831	77027234	SENP2	0.002781	region160
chr1	77025831	77027234	LIPH	0.002794	region160
chr1	77025831	77027234	LPP	0.002716	region160
chr1	77025831	77027234	MAP3K13	0.002619	region160
chr1	77025831	77027234	MASP1	0.004177	region160
chr1	77025831	77027234	EHHADH	0.002468	region160
chr1	77025831	77027234	TMEM41A	0.015667	region160
chr1	77025831	77027234	CLDN1	0.106913	region160
chr1	77025831	77027234	RTP4	0.004637	region160
chr1	77025831	77027234	ATP13A3	0.001652	region160
chr1	77025831	77027234	C1H3orf70	0.002882	region160
chr1	77025831	77027234	IGF2BP2	0.003103	region160
chr1	77041275	77041775	CLDN1	0.013243	region161
chr1	77042358	77042858	MASP1	0.00134	region162
chr1	77042358	77042858	RTP4	0.001488	region162
chr1	77042358	77042858	CLDN1	0.024354	region162
chr1	77043035	77043535	CLDN1	0.009613	region162
chr1	77292035	77292535	CLDN1	0.004803	region163
chr1	77292035	77292535	LPP	0.001208	region163
chr1	77292635	77293135	CLDN1	0.00365	region163
chr1	77293806	77294306	LPP	0.00128	region164
chr1	77293806	77294306	CLDN1	0.005089	region164
chr1	77343605	77344105	CLDN1	0.002301	region165
chr1	77357667	77358167	RTP4	0.001534	region166
chr1	77357667	77358167	MASP1	0.001377	region166
chr1	77357667	77358167	CLDN1	0.002719	region166
chr1	77973960	77974588	LPP	0.001066	region168
chr1	77973960	77974588	MASP1	0.00211	region168
chr1	78068955	78069823	IGF2BP2	0.001568	region169
chr1	78068955	78069823	MAP3K13	0.001289	region169
chr1	78068955	78069823	RTP4	0.002728	region169
chr1	78068955	78069823	LIPH	0.001392	region169
chr1	78068955	78069823	CLDN1	0.010737	region169
chr1	78068955	78069823	SENP2	0.001387	region169
chr1	78068955	78069823	LPP	0.001916	region169
chr1	78068955	78069823	EHHADH	0.001214	region169
chr1	78068955	78069823	C1H3orf70	0.001411	region169
chr1	78068955	78069823	TMEM41A	0.001269	region169
chr1	78068955	78069823	MASP1	0.002422	region169
chr1	78070018	78070643	LPP	0.001754	region169
chr1	78070018	78070643	MASP1	0.002217	region169
chr1	78070018	78070643	RTP4	0.002497	region169
chr1	78070018	78070643	EHHADH	0.001111	region169
chr1	78070018	78070643	C1H3orf70	0.001291	region169
chr1	78070018	78070643	TMEM41A	0.001161	region169
chr1	78070018	78070643	MAP3K13	0.00118	region169
chr1	78070018	78070643	CLDN1	0.009821	region169
chr1	78070018	78070643	IGF2BP2	0.001435	region169
chr1	78070018	78070643	LIPH	0.001274	region169
chr1	78070018	78070643	SENP2	0.001269	region169
chr1	78075260	78075760	LIPH	0.001586	region170
chr1	78075260	78075760	IGF2BP2	0.001786	region170
chr1	78075260	78075760	SENP2	0.00158	region170
chr1	78075260	78075760	LPP	0.00219	region170
chr1	78075260	78075760	RTP4	0.012451	region170
chr1	78075260	78075760	C1H3orf70	0.001607	region170
chr1	78075260	78075760	CLDN1	0.003808	region170
chr1	78075260	78075760	EHHADH	0.007612	region170
chr1	78075260	78075760	MASP1	0.008767	region170
chr1	78075260	78075760	MAP3K13	0.001468	region170
chr1	78075260	78075760	TMEM41A	0.001446	region170
chr1	78075800	78076300	RTP4	0.005659	region171
chr1	78075800	78076300	CLDN1	0.00173	region171
chr1	78075800	78076300	MASP1	0.003985	region171
chr1	78075800	78076300	EHHADH	0.00346	region171
chr1	78865695	78866195	MASP1	0.011873	region172
chr1	78865695	78866195	IGF2BP2	0.003764	region172
chr1	78865695	78866195	LPP	0.001834	region172
chr1	78865695	78866195	RTP4	0.001654	region172
chr1	78866515	78867015	MASP1	0.012442	region173
chr1	78866515	78867015	IGF2BP2	0.003945	region173
chr1	78866515	78867015	RTP4	0.001734	region173
chr1	78866515	78867015	LPP	0.001922	region173
chr1	78895816	78896638	CLDN1	0.004486	region174
chr1	78895816	78896638	IGF2BP2	0.00437	region174
chr1	78895816	78896638	MAP3K13	0.003471	region174
chr1	78895816	78896638	TMEM41A	0.003458	region174
chr1	78895816	78896638	ABCC5	0.002186	region174
chr1	78895816	78896638	EHHADH	0.003268	region174
chr1	78895816	78896638	C1H3orf70	0.003773	region174
chr1	78895816	78896638	SENP2	0.003798	region174
chr1	78895816	78896638	LIPH	0.024699	region174
chr1	78895816	78896638	MASP1	0.008551	region174
chr1	78895816	78896638	RTP4	0.009947	region174
chr1	78895816	78896638	LPP	0.023479	region174
chr1	78896777	78897277	TMEM41A	0.001846	region174
chr1	78896777	78897277	RTP4	0.005313	region174
chr1	78896777	78897277	LPP	0.012532	region174
chr1	78896777	78897277	C1H3orf70	0.002014	region174
chr1	78896777	78897277	MASP1	0.004567	region174
chr1	78896777	78897277	IGF2BP2	0.002333	region174
chr1	78896777	78897277	LIPH	0.013183	region174
chr1	78896777	78897277	SENP2	0.002028	region174
chr1	78896777	78897277	CLDN1	0.002394	region174
chr1	78896777	78897277	ABCC5	0.001167	region174
chr1	78896777	78897277	MAP3K13	0.001853	region174
chr1	78896777	78897277	EHHADH	0.001745	region174
chr1	78918596	78919096	LPP	0.003628	region175
chr1	78918596	78919096	RTP4	0.0016	region175
chr1	78918596	78919096	MASP1	0.001377	region175
chr1	78918596	78919096	LIPH	0.003816	region175
chr1	78920999	78921499	MASP1	0.001107	region176
chr1	78920999	78921499	LPP	0.002911	region176
chr1	78920999	78921499	RTP4	0.001284	region176
chr1	78920999	78921499	LIPH	0.003062	region176
chr1	78921617	78922117	LPP	0.003172	region177
chr1	78921617	78922117	RTP4	0.001399	region177
chr1	78921617	78922117	LIPH	0.003337	region177
chr1	78921617	78922117	MASP1	0.001207	region177
chr1	78990393	78991365	C1H3orf70	0.001521	region178
chr1	78990393	78991365	SENP2	0.001537	region178
chr1	78990393	78991365	TMEM41A	0.001398	region178
chr1	78990393	78991365	RTP4	0.003972	region178
chr1	78990393	78991365	CLDN1	0.001689	region178
chr1	78990393	78991365	MAP3K13	0.001401	region178
chr1	78990393	78991365	MASP1	0.003627	region178
chr1	78990393	78991365	LPP	0.005975	region178
chr1	78990393	78991365	EHHADH	0.001319	region178
chr1	78990393	78991365	IGF2BP2	0.001774	region178
chr1	78990393	78991365	LIPH	0.001542	region178
chr1	78992745	78993245	EHHADH	0.001483	region179
chr1	78992745	78993245	LIPH	0.001734	region179
chr1	78992745	78993245	MASP1	0.004083	region179
chr1	78992745	78993245	LPP	0.006715	region179
chr1	78992745	78993245	MAP3K13	0.001576	region179
chr1	78992745	78993245	RTP4	0.004464	region179
chr1	78992745	78993245	CLDN1	0.001896	region179
chr1	78992745	78993245	IGF2BP2	0.001995	region179
chr1	78992745	78993245	C1H3orf70	0.001711	region179
chr1	78992745	78993245	SENP2	0.001729	region179
chr1	78992745	78993245	TMEM41A	0.001572	region179
chr1	78993792	78994643	EHHADH	0.001764	region181
chr1	78993792	78994643	LIPH	0.002062	region181
chr1	78993792	78994643	LIPH	0.002062	region180
chr1	78993792	78994643	MASP1	0.00486	region180
chr1	78993792	78994643	SENP2	0.002056	region181
chr1	78993792	78994643	SENP2	0.002056	region180
chr1	78993792	78994643	IGF2BP2	0.002373	region181
chr1	78993792	78994643	C1H3orf70	0.002035	region180
chr1	78993792	78994643	LPP	0.007984	region181
chr1	78993792	78994643	C1H3orf70	0.002035	region181
chr1	78993792	78994643	LPP	0.007984	region180
chr1	78993792	78994643	EHHADH	0.001764	region180
chr1	78993792	78994643	CLDN1	0.002253	region180
chr1	78993792	78994643	MASP1	0.00486	region181
chr1	78993792	78994643	TMEM41A	0.00187	region181
chr1	78993792	78994643	TMEM41A	0.00187	region180
chr1	78993792	78994643	RTP4	0.005307	region181
chr1	78993792	78994643	RTP4	0.005307	region180
chr1	78993792	78994643	MAP3K13	0.001874	region181
chr1	78993792	78994643	ABCC5	0.00117	region180
chr1	78993792	78994643	ABCC5	0.00117	region181
chr1	78993792	78994643	CLDN1	0.002253	region181
chr1	78993792	78994643	MAP3K13	0.001874	region180
chr1	78993792	78994643	IGF2BP2	0.002373	region180
chr1	78995264	78995764	TMEM41A	0.001048	region182
chr1	78995264	78995764	LPP	0.004472	region182
chr1	78995264	78995764	MAP3K13	0.00105	region182
chr1	78995264	78995764	MASP1	0.002726	region182
chr1	78995264	78995764	CLDN1	0.001261	region182
chr1	78995264	78995764	IGF2BP2	0.00133	region182
chr1	78995264	78995764	C1H3orf70	0.00114	region182
chr1	78995264	78995764	LIPH	0.001156	region182
chr1	78995264	78995764	SENP2	0.001152	region182
chr1	78995264	78995764	RTP4	0.002973	region182
chr1	78995875	78996556	MASP1	0.004068	region182
chr1	78995875	78996556	IGF2BP2	0.001984	region182
chr1	78995875	78996556	CLDN1	0.001881	region182
chr1	78995875	78996556	LIPH	0.001724	region182
chr1	78995875	78996556	EHHADH	0.001475	region182
chr1	78995875	78996556	RTP4	0.004434	region182
chr1	78995875	78996556	LPP	0.006671	region182
chr1	78995875	78996556	MAP3K13	0.001567	region182
chr1	78995875	78996556	TMEM41A	0.001564	region182
chr1	78995875	78996556	C1H3orf70	0.001701	region182
chr1	78995875	78996556	SENP2	0.001719	region182
chr1	79028752	79029252	LPP	0.003851	region183
chr1	79028752	79029252	MASP1	0.001337	region183
chr1	79028752	79029252	RTP4	0.001445	region183
chr1	79086084	79086584	IGF2BP2	0.003108	region184
chr1	79086084	79086584	LPP	0.013577	region184
chr1	79086084	79086584	MASP1	0.014959	region184
chr1	79086084	79086584	RTP4	0.006719	region184
chr1	79086084	79086584	ABCC5	0.001511	region184
chr1	79086084	79086584	TMEM41A	0.002441	region184
chr1	79086084	79086584	MAP3K13	0.002441	region184
chr1	79086084	79086584	C1H3orf70	0.002647	region184
chr1	79086084	79086584	EHHADH	0.011367	region184
chr1	79086084	79086584	SENP2	0.002686	region184
chr1	79086084	79086584	CLDN1	0.002744	region184
chr1	79086084	79086584	LIPH	0.002693	region184
chr1	79086782	79087282	CLDN1	0.002247	region184
chr1	79086782	79087282	MAP3K13	0.002	region184
chr1	79086782	79087282	SENP2	0.0022	region184
chr1	79086782	79087282	LPP	0.01112	region184
chr1	79086782	79087282	LIPH	0.002206	region184
chr1	79086782	79087282	C1H3orf70	0.002169	region184
chr1	79086782	79087282	IGF2BP2	0.002546	region184
chr1	79086782	79087282	MASP1	0.012252	region184
chr1	79086782	79087282	ABCC5	0.001238	region184
chr1	79086782	79087282	RTP4	0.005503	region184
chr1	79086782	79087282	EHHADH	0.00931	region184
chr1	79086782	79087282	TMEM41A	0.001999	region184
chr1	79088020	79088520	C1H3orf70	0.001277	region185
chr1	79088020	79088520	SENP2	0.001296	region185
chr1	79088020	79088520	LIPH	0.001299	region185
chr1	79088020	79088520	TMEM41A	0.001177	region185
chr1	79088020	79088520	IGF2BP2	0.001499	region185
chr1	79088020	79088520	MASP1	0.007212	region185
chr1	79088020	79088520	CLDN1	0.001322	region185
chr1	79088020	79088520	MAP3K13	0.001178	region185
chr1	79088020	79088520	LPP	0.006545	region185
chr1	79088020	79088520	EHHADH	0.005481	region185
chr1	79088020	79088520	RTP4	0.003239	region185
chr1	79128668	79129168	CLDN1	0.001449	region186
chr1	79128668	79129168	LPP	0.003764	region186
chr1	79129619	79130119	CLDN1	0.002671	region187
chr1	79129619	79130119	RTP4	0.001742	region187
chr1	79129619	79130119	LPP	0.006941	region187
chr1	79129619	79130119	MASP1	0.001611	region187
chr1	79131260	79131760	IGF2BP2	0.001166	region188
chr1	79131260	79131760	LIPH	0.001008	region188
chr1	79131260	79131760	SENP2	0.001006	region188
chr1	79131260	79131760	MASP1	0.002292	region188
chr1	79131260	79131760	RTP4	0.002478	region188
chr1	79131260	79131760	LPP	0.009873	region188
chr1	79131260	79131760	CLDN1	0.003799	region188
chr1	79135944	79136696	IGF2BP2	0.005243	region189
chr1	79135944	79136696	LPP	0.044324	region189
chr1	79135944	79136696	LIPH	0.004535	region189
chr1	79135944	79136696	SENP2	0.004523	region189
chr1	79135944	79136696	C1H3orf70	0.004449	region189
chr1	79135944	79136696	CLDN1	0.017048	region189
chr1	79135944	79136696	ABCC5	0.002528	region189
chr1	79135944	79136696	RTP4	0.011123	region189
chr1	79135944	79136696	EHHADH	0.003864	region189
chr1	79135944	79136696	MASP1	0.010289	region189
chr1	79135944	79136696	MAP3K13	0.004105	region189
chr1	79135944	79136696	TMEM41A	0.004108	region189
chr1	79326329	79326829	MASP1	0.008973	region190
chr1	79326329	79326829	RTP4	0.0097	region190
chr1	79326329	79326829	ATP11B	0.003559	region190
chr1	79326329	79326829	ABCC5	0.002301	region190
chr1	79326329	79326829	EHHADH	0.003587	region190
chr1	79326329	79326829	CLDN1	0.003607	region190
chr1	79326329	79326829	IGF2BP2	0.004935	region190
chr1	79326329	79326829	LIPH	0.004236	region190
chr1	79326329	79326829	LPP	0.008981	region190
chr1	79326329	79326829	SENP2	0.004228	region190
chr1	79326329	79326829	MAP3K13	0.003812	region190
chr1	79326329	79326829	C1H3orf70	0.004121	region190
chr1	79326329	79326829	TMEM41A	0.003832	region190
chr1	79330951	79331830	MAP3K13	0.003512	region191
chr1	79330951	79331830	SENP2	0.003896	region191
chr1	79330951	79331830	MASP1	0.008253	region191
chr1	79330951	79331830	RTP4	0.008922	region191
chr1	79330951	79331830	ATP11B	0.003276	region191
chr1	79330951	79331830	IGF2BP2	0.004548	region191
chr1	79330951	79331830	ABCC5	0.002118	region191
chr1	79330951	79331830	TMEM41A	0.003531	region191
chr1	79330951	79331830	EHHADH	0.003305	region191
chr1	79330951	79331830	LPP	0.00826	region191
chr1	79330951	79331830	CLDN1	0.003311	region191
chr1	79330951	79331830	LIPH	0.003904	region191
chr1	79330951	79331830	C1H3orf70	0.003796	region191
chr1	79527881	79528604	ABCC5	0.001204	region192
chr1	79527881	79528604	TMEM41A	0.002066	region192
chr1	79527881	79528604	CLDN1	0.001675	region192
chr1	79527881	79528604	MASP1	0.004477	region192
chr1	79527881	79528604	ATP11B	0.001842	region192
chr1	79527881	79528604	IGF2BP2	0.002691	region192
chr1	79527881	79528604	EHHADH	0.001923	region192
chr1	79527881	79528604	MAP3K13	0.002044	region192
chr1	79527881	79528604	SENP2	0.002285	region192
chr1	79527881	79528604	LPP	0.004747	region192
chr1	79527881	79528604	RTP4	0.00484	region192
chr1	79527881	79528604	LIPH	0.002289	region192
chr1	79527881	79528604	C1H3orf70	0.002202	region192
chr1	79580815	79581315	IGF2BP2	0.002018	region193
chr1	79580815	79581315	RTP4	0.001048	region193
chr1	79580815	79581315	LPP	0.002443	region193
chr1	79580815	79581315	MASP1	0.002195	region193
chr1	79581967	79582709	C1H3orf70	0.001549	region194
chr1	79581967	79582709	MAP3K13	0.001439	region194
chr1	79581967	79582709	LPP	0.007785	region194
chr1	79581967	79582709	IGF2BP2	0.006431	region194
chr1	79581967	79582709	CLDN1	0.001135	region194
chr1	79581967	79582709	SENP2	0.001613	region194
chr1	79581967	79582709	MASP1	0.006995	region194
chr1	79581967	79582709	LIPH	0.001615	region194
chr1	79581967	79582709	ATP11B	0.001284	region194
chr1	79581967	79582709	TMEM41A	0.001457	region194
chr1	79581967	79582709	RTP4	0.003339	region194
chr1	79581967	79582709	EHHADH	0.001354	region194
chr1	79586636	79587966	ABCC5	0.001651	region195
chr1	79586636	79587966	C1H3orf70	0.00304	region196
chr1	79586636	79587966	CLDN1	0.00222	region195
chr1	79586636	79587966	MASP1	0.013704	region196
chr1	79586636	79587966	TMEM41A	0.00286	region196
chr1	79586636	79587966	CLDN1	0.00222	region196
chr1	79586636	79587966	C1H3orf70	0.00304	region195
chr1	79586636	79587966	TMEM41A	0.00286	region195
chr1	79586636	79587966	LPP	0.015251	region196
chr1	79586636	79587966	LIPH	0.003171	region196
chr1	79586636	79587966	ATP11B	0.002517	region195
chr1	79586636	79587966	IGF2BP2	0.012608	region196
chr1	79586636	79587966	ATP11B	0.002517	region196
chr1	79586636	79587966	EHHADH	0.002657	region196
chr1	79586636	79587966	MASP1	0.013704	region195
chr1	79586636	79587966	ABCC5	0.001651	region196
chr1	79586636	79587966	IGF2BP2	0.012608	region195
chr1	79586636	79587966	RTP4	0.006542	region196
chr1	79586636	79587966	SENP2	0.003167	region195
chr1	79586636	79587966	RTP4	0.006542	region195
chr1	79586636	79587966	LPP	0.015251	region195
chr1	79586636	79587966	EHHADH	0.002657	region195
chr1	79586636	79587966	MAP3K13	0.002825	region196
chr1	79586636	79587966	MAP3K13	0.002825	region195
chr1	79586636	79587966	SENP2	0.003167	region196
chr1	79586636	79587966	LIPH	0.003171	region195
chr1	79590696	79591196	ATP11B	0.00126	region197
chr1	79590696	79591196	MASP1	0.007089	region197
chr1	79590696	79591196	EHHADH	0.001331	region197
chr1	79590696	79591196	RTP4	0.003272	region197
chr1	79590696	79591196	MAP3K13	0.001415	region197
chr1	79590696	79591196	TMEM41A	0.001433	region197
chr1	79590696	79591196	CLDN1	0.001109	region197
chr1	79590696	79591196	C1H3orf70	0.001523	region197
chr1	79590696	79591196	LIPH	0.001588	region197
chr1	79590696	79591196	IGF2BP2	0.001874	region197
chr1	79590696	79591196	SENP2	0.001586	region197
chr1	79590696	79591196	LPP	0.003121	region197
chr1	79591328	79592184	ABCC5	0.001247	region198
chr1	79591328	79592184	MASP1	0.010695	region198
chr1	79591328	79592184	IGF2BP2	0.002828	region198
chr1	79591328	79592184	IGF2BP2	0.002828	region199
chr1	79591328	79592184	MAP3K13	0.002135	region199
chr1	79591328	79592184	CLDN1	0.001673	region198
chr1	79591328	79592184	MAP3K13	0.002135	region198
chr1	79591328	79592184	C1H3orf70	0.002298	region198
chr1	79591328	79592184	C1H3orf70	0.002298	region199
chr1	79591328	79592184	EHHADH	0.002008	region198
chr1	79591328	79592184	ABCC5	0.001247	region199
chr1	79591328	79592184	RTP4	0.004936	region198
chr1	79591328	79592184	MASP1	0.010695	region199
chr1	79591328	79592184	RTP4	0.004936	region199
chr1	79591328	79592184	CLDN1	0.001673	region199
chr1	79591328	79592184	SENP2	0.002394	region198
chr1	79591328	79592184	LPP	0.004708	region199
chr1	79591328	79592184	EHHADH	0.002008	region199
chr1	79591328	79592184	SENP2	0.002394	region199
chr1	79591328	79592184	LPP	0.004708	region198
chr1	79591328	79592184	TMEM41A	0.002162	region198
chr1	79591328	79592184	LIPH	0.002397	region198
chr1	79591328	79592184	TMEM41A	0.002162	region199
chr1	79591328	79592184	LIPH	0.002397	region199
chr1	79591328	79592184	ATP11B	0.001901	region198
chr1	79591328	79592184	ATP11B	0.001901	region199
chr1	79592321	79592821	RTP4	0.003007	region200
chr1	79592321	79592821	TMEM41A	0.001318	region200
chr1	79592321	79592821	ATP11B	0.001158	region200
chr1	79592321	79592821	MAP3K13	0.001301	region200
chr1	79592321	79592821	SENP2	0.001459	region200
chr1	79592321	79592821	LIPH	0.001461	region200
chr1	79592321	79592821	CLDN1	0.001019	region200
chr1	79592321	79592821	IGF2BP2	0.001724	region200
chr1	79592321	79592821	MASP1	0.006516	region200
chr1	79592321	79592821	LPP	0.002868	region200
chr1	79592321	79592821	C1H3orf70	0.0014	region200
chr1	79592321	79592821	EHHADH	0.001224	region200
chr1	79593349	79594120	SENP2	0.002842	region201
chr1	79593349	79594120	RTP4	0.005854	region201
chr1	79593349	79594120	LIPH	0.002845	region201
chr1	79593349	79594120	LPP	0.005583	region201
chr1	79593349	79594120	ATP11B	0.002255	region201
chr1	79593349	79594120	EHHADH	0.002384	region201
chr1	79593349	79594120	IGF2BP2	0.003357	region201
chr1	79593349	79594120	MAP3K13	0.002534	region201
chr1	79593349	79594120	MASP1	0.012683	region201
chr1	79593349	79594120	TMEM41A	0.002566	region201
chr1	79593349	79594120	ABCC5	0.001479	region201
chr1	79593349	79594120	C1H3orf70	0.002727	region201
chr1	79593349	79594120	CLDN1	0.001982	region201
chr1	79594390	79594890	LPP	0.00425	region202
chr1	79594390	79594890	ABCC5	0.001126	region202
chr1	79594390	79594890	MAP3K13	0.001929	region202
chr1	79594390	79594890	EHHADH	0.001815	region202
chr1	79594390	79594890	ATP11B	0.001717	region202
chr1	79594390	79594890	CLDN1	0.001508	region202
chr1	79594390	79594890	MASP1	0.009653	region202
chr1	79594390	79594890	RTP4	0.004456	region202
chr1	79594390	79594890	IGF2BP2	0.002557	region202
chr1	79594390	79594890	LIPH	0.002166	region202
chr1	79594390	79594890	C1H3orf70	0.002076	region202
chr1	79594390	79594890	SENP2	0.002164	region202
chr1	79594390	79594890	TMEM41A	0.001954	region202
chr1	79595685	79597109	MAP3K13	0.005527	region203
chr1	79595685	79597109	LIPH	0.006206	region203
chr1	79595685	79597109	ABCC5	0.003225	region203
chr1	79595685	79597109	SENP2	0.006198	region203
chr1	79595685	79597109	ATP11B	0.004915	region203
chr1	79595685	79597109	EHHADH	0.005198	region203
chr1	79595685	79597109	CLDN1	0.004315	region203
chr1	79595685	79597109	C1H3orf70	0.005947	region203
chr1	79595685	79597109	TMEM41A	0.005597	region203
chr1	79595685	79597109	LPP	0.012164	region203
chr1	79595685	79597109	IGF2BP2	0.007324	region203
chr1	79595685	79597109	RTP4	0.012754	region203
chr1	79595685	79597109	MASP1	0.027632	region203
chr1	79771909	79772409	CLDN1	0.001947	region204
chr1	79771909	79772409	MAP3K13	0.002829	region204
chr1	79771909	79772409	RTP4	0.006088	region204
chr1	79771909	79772409	C1H3orf70	0.003034	region204
chr1	79771909	79772409	IGF2BP2	0.003822	region204
chr1	79771909	79772409	SENP2	0.003202	region204
chr1	79771909	79772409	LPP	0.002777	region204
chr1	79771909	79772409	ABCC5	0.00161	region204
chr1	79771909	79772409	TMEM41A	0.002883	region204
chr1	79771909	79772409	ATP11B	0.002427	region204
chr1	79771909	79772409	EHHADH	0.002661	region204
chr1	79771909	79772409	LIPH	0.003204	region204
chr1	79771909	79772409	MASP1	0.005632	region204
chr1	79772775	79773275	MASP1	0.001886	region205
chr1	79772775	79773275	RTP4	0.002039	region205
chr1	79772775	79773275	SENP2	0.001073	region205
chr1	79772775	79773275	C1H3orf70	0.001016	region205
chr1	79772775	79773275	IGF2BP2	0.001281	region205
chr1	79772775	79773275	LIPH	0.001073	region205
chr1	79781319	79782092	CLDN1	0.001869	region206
chr1	79781319	79782092	RTP4	0.005861	region206
chr1	79781319	79782092	MASP1	0.005422	region206
chr1	79781319	79782092	ATP11B	0.002341	region206
chr1	79781319	79782092	LPP	0.002674	region206
chr1	79781319	79782092	ABCC5	0.001553	region206
chr1	79781319	79782092	C1H3orf70	0.002932	region206
chr1	79781319	79782092	LIPH	0.003098	region206
chr1	79781319	79782092	SENP2	0.003096	region206
chr1	79781319	79782092	TMEM41A	0.002787	region206
chr1	79781319	79782092	IGF2BP2	0.003698	region206
chr1	79781319	79782092	MAP3K13	0.002735	region206
chr1	79781319	79782092	EHHADH	0.002572	region206
chr1	79915804	79916611	MAP3K13	0.001228	region207
chr1	79915804	79916611	LPP	0.001133	region207
chr1	79915804	79916611	EHHADH	0.001154	region207
chr1	79915804	79916611	ATP11B	0.001019	region207
chr1	79915804	79916611	LIPH	0.001401	region207
chr1	79915804	79916611	TMEM41A	0.001258	region207
chr1	79915804	79916611	RTP4	0.07487	region207
chr1	79915804	79916611	IGF2BP2	0.00169	region207
chr1	79915804	79916611	MASP1	0.006987	region207
chr1	79915804	79916611	SENP2	0.006	region207
chr1	79915804	79916611	C1H3orf70	0.007597	region207
chr1	80034044	80034544	MASP1	0.017507	region208
chr1	80034044	80034544	MAP3K13	0.001077	region208
chr1	80034044	80034544	SENP2	0.001239	region208
chr1	80034044	80034544	TMEM41A	0.001109	region208
chr1	80034044	80034544	LIPH	0.001238	region208
chr1	80034044	80034544	EHHADH	0.001012	region208
chr1	80034044	80034544	IGF2BP2	0.001508	region208
chr1	80034044	80034544	RTP4	0.006915	region208
chr1	80034044	80034544	C1H3orf70	0.001147	region208
chr1	80089581	80090081	MASP1	0.001262	region209
chr1	80089581	80090081	IGF2BP2	0.001034	region209
chr1	80089581	80090081	RTP4	0.001364	region209
chr1	80092816	80093553	MAP3K13	0.001721	region210
chr1	80092816	80093553	EHHADH	0.001617	region210
chr1	80092816	80093553	ATP11B	0.001363	region210
chr1	80092816	80093553	TMEM41A	0.001778	region210
chr1	80092816	80093553	RTP4	0.003204	region210
chr1	80092816	80093553	IGF2BP2	0.002434	region210
chr1	80092816	80093553	SENP2	0.001989	region210
chr1	80092816	80093553	C1H3orf70	0.00183	region210
chr1	80092816	80093553	LIPH	0.001987	region210
chr1	80092816	80093553	MASP1	0.002964	region210
chr1	80092816	80093553	LPP	0.001461	region210
chr1	80094671	80095171	RTP4	0.001474	region211
chr1	80094671	80095171	MASP1	0.001364	region211
chr1	80094671	80095171	IGF2BP2	0.001121	region211
chr1	81456417	81456917	ABCC5	0.00108	region212
chr1	81456417	81456917	EHHADH	0.001858	region212
chr1	81456417	81456917	MAP3K13	0.001968	region212
chr1	81456417	81456917	ATP11B	0.00134	region212
chr1	81456417	81456917	RTP4	0.001527	region212
chr1	81456417	81456917	C1H3orf70	0.002211	region212
chr1	81456417	81456917	SENP2	0.001997	region212
chr1	81456417	81456917	TMEM41A	0.005164	region212
chr1	81456417	81456917	IGF2BP2	0.006664	region212
chr1	81456417	81456917	LIPH	0.002013	region212
chr1	81456417	81456917	MASP1	0.001489	region212
chr1	81459787	81461195	LPP	0.001752	region213
chr1	81459787	81461195	TMEM41A	0.018171	region213
chr1	81459787	81461195	LIPH	0.007083	region213
chr1	81459787	81461195	IGF2BP2	0.023451	region213
chr1	81459787	81461195	SENP2	0.007028	region213
chr1	81459787	81461195	CLDN1	0.00166	region213
chr1	81459787	81461195	ABCC5	0.003808	region213
chr1	81459787	81461195	MASP1	0.005227	region213
chr1	81459787	81461195	ATP11B	0.004723	region213
chr1	81459787	81461195	RTP4	0.005364	region213
chr1	81459787	81461195	MAP3K13	0.006927	region213
chr1	81459787	81461195	C1H3orf70	0.007782	region213
chr1	81459787	81461195	EHHADH	0.006539	region213
chr1	81521647	81522147	SENP2	0.011069	region215
chr1	81521647	81522147	MAP3K13	0.013272	region215
chr1	81521647	81522147	EHHADH	0.0187	region215
chr1	81521647	81522147	ATP11B	0.002729	region215
chr1	81521647	81522147	ABCC5	0.008736	region215
chr1	81521647	81522147	IGF2BP2	0.021011	region215
chr1	81521647	81522147	C1H3orf70	0.004409	region215
chr1	81521647	81522147	TMEM41A	0.015929	region215
chr1	81521647	81522147	RTP4	0.002938	region215
chr1	81521647	81522147	MASP1	0.002857	region215
chr1	81521647	81522147	LIPH	0.013637	region215
chr1	81633123	81633943	ABCC5	0.004114	region216
chr1	81633123	81633943	EHHADH	0.034909	region216
chr1	81633123	81633943	MAP3K13	0.0068	region216
chr1	81633123	81633943	IGF2BP2	0.00738	region216
chr1	81633123	81633943	TMEM41A	0.041249	region216
chr1	81633123	81633943	CLDN1	0.001577	region216
chr1	81633123	81633943	ATP11B	0.004905	region216
chr1	81633123	81633943	RTP4	0.004801	region216
chr1	81633123	81633943	LIPH	0.147744	region216
chr1	81633123	81633943	C1H3orf70	0.00764	region216
chr1	81633123	81633943	MASP1	0.004654	region216
chr1	81633123	81633943	SENP2	0.10116	region216
chr1	81633123	81633943	LPP	0.001614	region216
chr1	82052852	82053352	EHHADH	0.002149	region218
chr1	82052852	82053352	SENP2	0.00231	region218
chr1	82052852	82053352	LIPH	0.002328	region218
chr1	82052852	82053352	ATP11B	0.001915	region218
chr1	82052852	82053352	C1H3orf70	0.015769	region218
chr1	82052852	82053352	RTP4	0.001329	region218
chr1	82052852	82053352	MAP3K13	0.002276	region218
chr1	82052852	82053352	ABCC5	0.001837	region218
chr1	82052852	82053352	IGF2BP2	0.002471	region218
chr1	82052852	82053352	MASP1	0.001276	region218
chr1	82052852	82053352	TMEM41A	0.002153	region218
chr1	82835207	82835707	LIPH	0.001445	region219
chr1	82835207	82835707	ATP11B	0.002051	region219
chr1	82835207	82835707	SENP2	0.001418	region219
chr1	82835207	82835707	ABCC5	0.004194	region219
chr1	82835207	82835707	EHHADH	0.001562	region219
chr1	82835207	82835707	TMEM41A	0.004006	region219
chr1	82835207	82835707	MAP3K13	0.001654	region219
chr1	82835207	82835707	C1H3orf70	0.001859	region219
chr1	82835207	82835707	IGF2BP2	0.001313	region219
chr1	82835207	82835707	LPP	0.001514	region219
chr1	83157129	83157629	LIPH	0.001065	region220
chr1	83157129	83157629	SENP2	0.001047	region220
chr1	83157129	83157629	TMEM41A	0.00102	region220
chr1	83157129	83157629	ATP11B	0.005909	region220
chr1	83157129	83157629	EHHADH	0.003457	region220
chr1	83157129	83157629	C1H3orf70	0.004456	region220
chr1	83157129	83157629	ABCC5	0.013333	region220
chr1	83157129	83157629	MAP3K13	0.004088	region220
chr1	83158055	83158555	IGF2BP2	0.001281	region221
chr1	83158055	83158555	LIPH	0.001367	region221
chr1	83158055	83158555	ATP11B	0.007593	region221
chr1	83158055	83158555	MAP3K13	0.00525	region221
chr1	83158055	83158555	EHHADH	0.00444	region221
chr1	83158055	83158555	ABCC5	0.017128	region221
chr1	83158055	83158555	TMEM41A	0.001309	region221
chr1	83158055	83158555	SENP2	0.001345	region221
chr1	83158055	83158555	C1H3orf70	0.005723	region221
chr1	83172618	83173402	SENP2	0.004787	region222
chr1	83172618	83173402	TMEM41A	0.004658	region222
chr1	83172618	83173402	EHHADH	0.005212	region222
chr1	83172618	83173402	MAP3K13	0.005485	region222
chr1	83172618	83173402	IGF2BP2	0.004564	region222
chr1	83172618	83173402	ATP11B	0.010917	region222
chr1	83172618	83173402	LIPH	0.004866	region222
chr1	83172618	83173402	RTP4	0.002797	region222
chr1	83172618	83173402	ABCC5	0.047916	region222
chr1	83172618	83173402	LPP	0.001072	region222
chr1	83172618	83173402	MASP1	0.002651	region222
chr1	83172618	83173402	C1H3orf70	0.006682	region222
chr1	83172618	83173402	GNB4	0.002647	region222
chr1	83172618	83173402	PIK3CA	0.002123	region222
chr1	83211474	83212379	MAP3K13	0.004665	region223
chr1	83211474	83212379	TMEM41A	0.003973	region223
chr1	83211474	83212379	RTP4	0.002415	region223
chr1	83211474	83212379	MASP1	0.002289	region223
chr1	83211474	83212379	PIK3CA	0.001865	region223
chr1	83211474	83212379	IGF2BP2	0.003907	region223
chr1	83211474	83212379	EHHADH	0.015134	region223
chr1	83211474	83212379	SENP2	0.004087	region223
chr1	83211474	83212379	LIPH	0.004154	region223
chr1	83211474	83212379	GNB4	0.002327	region223
chr1	83211474	83212379	ATP11B	0.009842	region223
chr1	83211474	83212379	ABCC5	0.042311	region223
chr1	83211474	83212379	C1H3orf70	0.005669	region223
chr1	83213536	83214036	MAP3K13	0.003825	region224
chr1	83213536	83214036	TMEM41A	0.003259	region224
chr1	83213536	83214036	ATP11B	0.008093	region224
chr1	83213536	83214036	PIK3CA	0.001532	region224
chr1	83213536	83214036	C1H3orf70	0.004648	region224
chr1	83213536	83214036	IGF2BP2	0.003205	region224
chr1	83213536	83214036	EHHADH	0.012421	region224
chr1	83213536	83214036	GNB4	0.001911	region224
chr1	83213536	83214036	RTP4	0.001982	region224
chr1	83213536	83214036	LIPH	0.003407	region224
chr1	83213536	83214036	MASP1	0.001878	region224
chr1	83213536	83214036	ABCC5	0.034738	region224
chr1	83213536	83214036	SENP2	0.003352	region224
chr1	86086433	86086933	PIK3CA	0.001597	region225
chr1	86086433	86086933	GNB4	0.002203	region225
chr1	86086433	86086933	ATP11B	0.015319	region225
chr1	88772201	88773398	PIK3CA	0.00391	region226
chr1	88772201	88773398	GNB4	0.00415	region226
chr1	88772201	88773398	ATP11B	0.001442	region226
chr1	89587024	89587524	PIK3CA	0.001708	region227
chr1	89587024	89587524	GNB4	0.00172	region227
chr1	89601828	89602328	GNB4	0.003702	region228
chr1	89601828	89602328	PIK3CA	0.003671	region228
chr1	89605480	89605980	GNB4	0.002915	region229
chr1	89605480	89605980	PIK3CA	0.00289	region229
chr1	89804644	89805144	PIK3CA	0.002979	region230
chr1	89804644	89805144	ECT2	0.00125	region230
chr1	89804644	89805144	GNB4	0.003052	region230
chr1	89806890	89807646	GNB4	0.006832	region231
chr1	89806890	89807646	PIK3CA	0.006669	region231
chr1	89806890	89807646	ECT2	0.002802	region231
chr1	89808528	89809153	GNB4	0.001168	region232
chr1	89808528	89809153	PIK3CA	0.00114	region232
chr1	89828041	89828541	GNB4	0.003353	region233
chr1	89828041	89828541	PIK3CA	0.003268	region233
chr1	89828041	89828541	ECT2	0.001392	region233
chr1	89828041	89828541	NCEH1	0.001233	region233
chr1	89964317	89964817	PIK3CA	0.001098	region234
chr1	89964317	89964817	GNB4	0.001136	region234
chr1	90093894	90094562	PIK3CA	0.001198	region236
chr1	90093894	90094562	GNB4	0.001249	region236
chr1	93538144	93538644	NCEH1	0.002484	region238
chr1	93538144	93538644	ECT2	0.001101	region238
chr1	93538144	93538644	TNFSF10	0.001806	region238
chr1	93558541	93559041	TNFSF10	0.00406	region239
chr1	93558541	93559041	TNIK	0.002943	region239
chr1	93558541	93559041	ECT2	0.011657	region239
chr1	93558541	93559041	NCEH1	0.002169	region239
chr1	93715198	93715698	ECT2	0.001637	region240
chr1	93715198	93715698	TNFSF10	0.001049	region240
chr1	93715198	93715698	NCEH1	0.001406	region240
chr1	93735494	93735994	NCEH1	0.001075	region241
chr1	93735494	93735994	ECT2	0.001253	region241
chr1	94315365	94315865	TNFSF10	0.003992	region242
chr1	94315365	94315865	PHC3	0.002318	region242
chr1	94315365	94315865	ECT2	0.002332	region242
chr1	94315365	94315865	NCEH1	0.002084	region242
chr1	94917589	94918551	PHC3	0.001823	region244
chr1	94917589	94918551	ECT2	0.006625	region244
chr1	94917589	94918551	PRKCI	0.002044	region244
chr1	94917589	94918551	FNDC3B	0.008884	region244
chr1	94917589	94918551	TNFSF10	0.039208	region244
chr1	94917589	94918551	TNIK	0.003703	region244
chr1	94917589	94918551	NCEH1	0.01559	region244
chr1	94937205	94938126	PHC3	0.003616	region245
chr1	94937205	94938126	ECT2	0.013046	region245
chr1	94937205	94938126	TNIK	0.007407	region245
chr1	94937205	94938126	FNDC3B	0.018012	region245
chr1	94937205	94938126	TNFSF10	0.038026	region245
chr1	94937205	94938126	NCEH1	0.031578	region245
chr1	94937205	94938126	PRKCI	0.004056	region245
chr1	94950252	94950752	TNFSF10	0.002609	region246
chr1	94950252	94950752	TNIK	0.001009	region246
chr1	94950252	94950752	NCEH1	0.001605	region246
chr1	94951119	94951619	TNFSF10	0.007959	region247
chr1	94951119	94951619	ECT2	0.002129	region247
chr1	94951119	94951619	FNDC3B	0.001024	region247
chr1	94951119	94951619	TNIK	0.003077	region247
chr1	94951119	94951619	NCEH1	0.004896	region247
chr1	94985080	94985580	TNFSF10	0.145859	region248
chr1	94985080	94985580	NCEH1	0.024422	region248
chr1	94985080	94985580	FNDC3B	0.002435	region248
chr1	94985080	94985580	PRKCI	0.001604	region248
chr1	94985080	94985580	PHC3	0.004257	region248
chr1	94985080	94985580	ECT2	0.031689	region248
chr1	94985080	94985580	TNIK	0.002988	region248
chr1	95239264	95239764	FNDC3B	0.011773	region249
chr1	95239264	95239764	TNIK	0.003468	region249
chr1	95239264	95239764	ECT2	0.005693	region249
chr1	95239264	95239764	PRKCI	0.002009	region249
chr1	95239264	95239764	TNFSF10	0.004291	region249
chr1	95239264	95239764	NCEH1	0.005086	region249
chr1	95239264	95239764	PHC3	0.001788	region249
chr1	95368625	95369125	FNDC3B	0.015902	region250
chr1	95368625	95369125	TNFSF10	0.004905	region250
chr1	95368625	95369125	ECT2	0.002208	region250
chr1	95368625	95369125	NCEH1	0.001972	region250
chr1	95368625	95369125	TNIK	0.001345	region250
chr1	95548803	95549881	TNIK	0.007011	region251
chr1	95548803	95549881	TNFSF10	0.008675	region251
chr1	95548803	95549881	PHC3	0.0042	region251
chr1	95548803	95549881	PRKCI	0.004733	region251
chr1	95548803	95549881	ECT2	0.01151	region251
chr1	95548803	95549881	FNDC3B	0.056618	region251
chr1	95548803	95549881	NCEH1	0.010284	region251
chr1	95550297	95550797	PRKCI	0.003768	region252
chr1	95550297	95550797	FNDC3B	0.026164	region252
chr1	95550297	95550797	PHC3	0.003344	region252
chr1	95550297	95550797	TNIK	0.005578	region252
chr1	95550297	95550797	TNFSF10	0.006902	region252
chr1	95550297	95550797	ECT2	0.009158	region252
chr1	95550297	95550797	NCEH1	0.008182	region252
chr1	95557910	95558410	PHC3	0.001173	region253
chr1	95557910	95558410	TNFSF10	0.002413	region253
chr1	95557910	95558410	PRKCI	0.001323	region253
chr1	95557910	95558410	TNIK	0.00195	region253
chr1	95557910	95558410	FNDC3B	0.009146	region253
chr1	95557910	95558410	ECT2	0.003201	region253
chr1	95557910	95558410	NCEH1	0.00286	region253
chr1	95994921	95995421	PRKCI	0.005176	region254
chr1	95994921	95995421	TNIK	0.079083	region254
chr1	95994921	95995421	ECT2	0.00796	region254
chr1	95994921	95995421	FNDC3B	0.004572	region254
chr1	95994921	95995421	TNFSF10	0.015468	region254
chr1	95994921	95995421	NCEH1	0.007371	region254
chr1	95994921	95995421	PHC3	0.011284	region254
chr1	96074220	96074720	FNDC3B	0.002827	region255
chr1	96074220	96074720	PRKCI	0.003402	region255
chr1	96074220	96074720	NCEH1	0.011165	region255
chr1	96074220	96074720	TNFSF10	0.00411	region255
chr1	96074220	96074720	TNIK	0.033336	region255
chr1	96074220	96074720	ECT2	0.013839	region255
chr1	96074220	96074720	PHC3	0.002994	region255
chr1	96077336	96077836	PHC3	0.002382	region256
chr1	96077336	96077836	TNIK	0.017533	region256
chr1	96077336	96077836	FNDC3B	0.002244	region256
chr1	96077336	96077836	PRKCI	0.002707	region256
chr1	96077336	96077836	ECT2	0.003691	region256
chr1	96077336	96077836	TNFSF10	0.007448	region256
chr1	96077336	96077836	NCEH1	0.00341	region256
chr1	96079035	96079535	FNDC3B	0.0019	region257
chr1	96079035	96079535	PRKCI	0.002296	region257
chr1	96079035	96079535	ECT2	0.003123	region257
chr1	96079035	96079535	TNFSF10	0.006305	region257
chr1	96079035	96079535	TNIK	0.01485	region257
chr1	96079035	96079535	NCEH1	0.002885	region257
chr1	96079035	96079535	PHC3	0.00202	region257
chr1	96085561	96086061	FNDC3B	0.002416	region258
chr1	96085561	96086061	PHC3	0.002581	region258
chr1	96085561	96086061	TNFSF10	0.007997	region258
chr1	96085561	96086061	PRKCI	0.002934	region258
chr1	96085561	96086061	ECT2	0.003953	region258
chr1	96085561	96086061	TNIK	0.018879	region258
chr1	96085561	96086061	NCEH1	0.003651	region258
chr1	96293830	96294463	ECT2	0.001456	region260
chr1	96293830	96294463	NCEH1	0.001339	region260
chr1	96293830	96294463	TNFSF10	0.001253	region260
chr1	96293830	96294463	PHC3	0.001184	region260
chr1	96293830	96294463	FNDC3B	0.001011	region260
chr1	96293830	96294463	PRKCI	0.004723	region260
chr1	96293830	96294463	TNIK	0.003547	region260
chr1	96344742	96345242	TNIK	0.009692	region261
chr1	96344742	96345242	PRKCI	0.008171	region261
chr1	96344742	96345242	PHC3	0.002986	region261
chr1	96344742	96345242	TNFSF10	0.003059	region261
chr1	96344742	96345242	ECT2	0.003571	region261
chr1	96344742	96345242	FNDC3B	0.002552	region261
chr1	96344742	96345242	NCEH1	0.00328	region261
chr1	96345339	96345839	TNFSF10	0.002185	region261
chr1	96345339	96345839	TNIK	0.002066	region261
chr1	96406874	96407374	TNIK	0.016649	region262
chr1	96406874	96407374	TNFSF10	0.004301	region262
chr1	96406874	96407374	PHC3	0.004365	region262
chr1	96406874	96407374	ECT2	0.005047	region262
chr1	96406874	96407374	PRKCI	0.004834	region262
chr1	96406874	96407374	NCEH1	0.004631	region262
chr1	96406874	96407374	FNDC3B	0.00373	region262
chr1	96981959	96982758	TNFSF10	0.002236	region263
chr1	96981959	96982758	TNIK	0.003728	region263
chr1	96981959	96982758	ECT2	0.003764	region263
chr1	96981959	96982758	PRKCI	0.00308	region263
chr1	96981959	96982758	PHC3	0.003426	region263
chr1	96981959	96982758	FNDC3B	0.001852	region263
chr1	97147334	97147834	TNIK	0.002877	region264
chr1	97147334	97147834	TNFSF10	0.002017	region264
chr1	97147334	97147834	NCEH1	0.002242	region264
chr1	97147334	97147834	FNDC3B	0.001614	region264
chr1	97147334	97147834	PRKCI	0.051128	region264
chr1	97147334	97147834	PHC3	0.021171	region264
chr1	97147334	97147834	ECT2	0.002464	region264
chr1	97149397	97149897	ECT2	0.001023	region265
chr1	97149397	97149897	TNIK	0.001193	region265
chr1	97149397	97149897	PHC3	0.008794	region265
chr1	97149397	97149897	PRKCI	0.021237	region265
chr1	97213639	97214139	FNDC3B	0.001477	region266
chr1	97213639	97214139	PRKCI	0.005962	region266
chr1	97213639	97214139	PHC3	0.014294	region266
chr1	98412714	98413214	PHC3	0.001057	region268
chr1	98412714	98413214	NCEH1	0.003095	region268
chr1	98412714	98413214	PRKCI	0.001144	region268
chr1	98413301	98413801	PHC3	0.001549	region268
chr1	98413301	98413801	PRKCI	0.001676	region268
chr1	98413301	98413801	NCEH1	0.004538	region268
chr1	98413301	98413801	ECT2	0.00106	region268
chr1	98505865	98506365	PHC3	0.001018	region269
chr1	98505865	98506365	PRKCI	0.001104	region269
chr1	98507484	98508448	TNFSF10	0.002889	region270
chr1	98507484	98508448	PRKCI	0.005525	region270
chr1	98507484	98508448	FNDC3B	0.002104	region270
chr1	98507484	98508448	TNIK	0.003162	region270
chr1	98507484	98508448	PHC3	0.005097	region270
chr1	98507484	98508448	NCEH1	0.00329	region270
chr1	98507484	98508448	ECT2	0.00364	region270
chr1	98508465	98508965	NCEH1	0.001113	region270
chr1	98508465	98508965	PHC3	0.001724	region270
chr1	98508465	98508965	TNIK	0.00107	region270
chr1	98508465	98508965	ECT2	0.001232	region270
chr1	98508465	98508965	PRKCI	0.001869	region270
chr1	98547585	98548085	PHC3	0.001198	region271
chr1	98547585	98548085	PRKCI	0.001755	region271
chr1	98548347	98548847	PRKCI	0.004453	region272
chr1	98548347	98548847	PHC3	0.00304	region272
chr1	98589487	98589987	TNFSF10	0.001192	region274
chr1	98591177	98592078	ECT2	0.001713	region275
chr1	98591177	98592078	PRKCI	0.002515	region275
chr1	98591177	98592078	TNFSF10	0.005619	region275
chr1	98591177	98592078	PHC3	0.002318	region275
chr1	98591177	98592078	TNIK	0.001474	region275
chr1	98591177	98592078	NCEH1	0.001548	region275
chr1	104884846	104885346	KPNA4	0.002314	region276
chr1	104884846	104885346	IL12A	0.005032	region276
chr1	104884846	104885346	B3GALNT1	0.001814	region276
chr1	104886093	104886593	IL12A	0.002829	region277
chr1	104886093	104886593	KPNA4	0.001302	region277
chr1	104886093	104886593	B3GALNT1	0.00102	region277
chr1	106306830	106307330	B3GALNT1	0.019126	region278
chr1	106306830	106307330	KPNA4	0.007626	region278
chr1	106306830	106307330	IL12A	0.002183	region278
chr1	107575282	107576763	KPNA4	0.045117	region279
chr1	107575282	107576763	GMPS	0.003083	region279
chr1	107575282	107576763	LEKR1	0.003394	region279
chr1	107575282	107576763	IL12A	0.07877	region279
chr1	107575282	107576763	TIPARP	0.00315	region279
chr1	107575282	107576763	B3GALNT1	0.009325	region279
chr1	107656229	107657136	KPNA4	0.004692	region280
chr1	107656229	107657136	IL12A	0.007933	region280
chr1	107656229	107657136	B3GALNT1	0.002367	region280
chr1	107682691	107683707	TIPARP	0.001239	region281
chr1	107682691	107683707	B3GALNT1	0.003317	region281
chr1	107682691	107683707	GMPS	0.001206	region281
chr1	107682691	107683707	LEKR1	0.001338	region281
chr1	107682691	107683707	IL12A	0.034065	region281
chr1	107682691	107683707	KPNA4	0.007284	region281
chr1	110474486	110474986	TIPARP	0.002334	region282
chr1	110474486	110474986	LEKR1	0.002768	region282
chr1	110474486	110474986	GMPS	0.002679	region282
chr1	110475276	110475776	IL12A	0.001093	region283
chr1	110475276	110475776	KPNA4	0.001185	region283
chr1	110475276	110475776	TIPARP	0.010243	region283
chr1	110475276	110475776	LEKR1	0.00452	region283
chr1	110475276	110475776	GMPS	0.007143	region283
chr1	110476736	110477236	LEKR1	0.004896	region284
chr1	110476736	110477236	TIPARP	0.011095	region284
chr1	110476736	110477236	IL12A	0.001183	region284
chr1	110476736	110477236	KPNA4	0.001284	region284
chr1	110476736	110477236	GMPS	0.007739	region284
chr1	110477643	110478398	LEKR1	0.010644	region285
chr1	110477643	110478398	IL12A	0.002571	region285
chr1	110477643	110478398	TIPARP	0.024122	region285
chr1	110477643	110478398	B3GALNT1	0.001434	region285
chr1	110477643	110478398	KPNA4	0.00279	region285
chr1	110477643	110478398	GMPS	0.016829	region285
chr1	110480313	110480813	KPNA4	0.001776	region286
chr1	110480313	110480813	TIPARP	0.015362	region286
chr1	110480313	110480813	GMPS	0.010721	region286
chr1	110480313	110480813	LEKR1	0.006779	region286
chr1	110480313	110480813	IL12A	0.001636	region286
chr1	110481421	110481921	LEKR1	0.011738	region287
chr1	110481421	110481921	B3GALNT1	0.001581	region287
chr1	110481421	110481921	IL12A	0.002832	region287
chr1	110481421	110481921	KPNA4	0.003074	region287
chr1	110481421	110481921	GMPS	0.018567	region287
chr1	110481421	110481921	TIPARP	0.026599	region287
chr1	110483733	110484233	KPNA4	0.003821	region288
chr1	110483733	110484233	LEKR1	0.0146	region288
chr1	110483733	110484233	TIPARP	0.033085	region288
chr1	110483733	110484233	GMPS	0.023102	region288
chr1	110483733	110484233	B3GALNT1	0.001965	region288
chr1	110483733	110484233	IL12A	0.003521	region288
chr1	110704270	110704770	GMPS	0.003532	region289
chr1	110704270	110704770	LEKR1	0.005816	region289
chr1	110704270	110704770	B3GALNT1	0.002456	region289
chr1	110704270	110704770	TIPARP	0.006528	region289
chr1	111836786	111837286	GMPS	0.005672	region290
chr1	111857565	111858065	GMPS	0.002692	region291
chr1	111914181	111914681	GMPS	0.019112	region292
chr1	111914181	111914681	LEKR1	0.002309	region292
chr1	111914181	111914681	KPNA4	0.001297	region292
chr1	111914181	111914681	IL12A	0.001146	region292
chr1	111914181	111914681	TIPARP	0.005601	region292
chr1	111914725	111916304	P2RY14	0.001252	region292
chr1	111914725	111916304	GMPS	0.014314	region292
chr1	111914725	111916304	IL12A	0.002178	region292
chr1	111914725	111916304	TIPARP	0.011402	region292
chr1	111914725	111916304	LEKR1	0.004384	region292
chr1	111914725	111916304	KPNA4	0.002463	region292
chr1	111920591	111921091	GMPS	0.010572	region293
chr1	111920591	111921091	KPNA4	0.001818	region293
chr1	111920591	111921091	TIPARP	0.008422	region293
chr1	111920591	111921091	LEKR1	0.003225	region293
chr1	111920591	111921091	IL12A	0.001607	region293
chr1	111921593	111922093	LEKR1	0.001066	region294
chr1	111921593	111922093	TIPARP	0.002785	region294
chr1	111921593	111922093	GMPS	0.003496	region294
chr1	112776966	112777466	GMPS	0.001317	region295
chr1	116826074	116826574	P2RY14	0.053865	region296
chr1	116826074	116826574	HLTF	0.003751	region296
chr1	116826581	116827081	P2RY14	0.0479	region296
chr1	116826581	116827081	HLTF	0.003336	region296
chr1	116863651	116864151	P2RY14	0.01349	region297
chr1	116864220	116864997	HLTF	0.003251	region297
chr1	116864220	116864997	P2RY14	0.056738	region297
chr1	116864220	116864997	TM4SF1	0.001912	region297
chr1	117617507	117618007	P2RY14	0.007576	region298
chr1	117617507	117618007	PLSCR4	0.001151	region298
chr1	117617507	117618007	HLTF	0.001612	region298
chr1	117617507	117618007	TM4SF1	0.001011	region298
chr1	117618064	117618564	P2RY14	0.003951	region298
chr1	117800437	117800937	P2RY14	0.002587	region299
chr1	117800437	117800937	PLSCR4	0.001744	region299
chr1	117800437	117800937	PLSCR2	0.001407	region299
chr1	117800437	117800937	TM4SF1	0.001709	region299
chr1	117800437	117800937	HLTF	0.002651	region299
chr1	118000866	118001366	P2RY14	0.001086	region300
chr1	118000866	118001366	HLTF	0.0015	region300
chr1	118053898	118054398	HLTF	0.010186	region301
chr1	118053898	118054398	TM4SF1	0.001835	region301
chr1	118053898	118054398	PLSCR4	0.001955	region301
chr1	118053898	118054398	PLSCR2	0.001584	region301
chr1	118053898	118054398	P2RY14	0.002286	region301
chr1	118055250	118055750	HLTF	0.007507	region302
chr1	118055250	118055750	PLSCR4	0.001441	region302
chr1	118055250	118055750	TM4SF1	0.001352	region302
chr1	118055250	118055750	P2RY14	0.001682	region302
chr1	118055250	118055750	PLSCR2	0.001168	region302
chr1	118527384	118527884	P2RY14	0.002226	region303
chr1	118527384	118527884	HLTF	0.010811	region303
chr1	118527384	118527884	TM4SF1	0.002368	region303
chr1	118527384	118527884	PLSCR4	0.002799	region303
chr1	118527384	118527884	PLSCR2	0.002288	region303
chr1	118617367	118617867	PLSCR4	0.002609	region304
chr1	118617367	118617867	P2RY14	0.001943	region304
chr1	118617367	118617867	TM4SF1	0.005257	region304
chr1	118617367	118617867	HLTF	0.010727	region304
chr1	118617367	118617867	PLSCR2	0.002137	region304
chr1	118618021	118618979	PLSCR4	0.005372	region304
chr1	118618021	118618979	TM4SF1	0.010821	region304
chr1	118618021	118618979	PLSCR2	0.0044	region304
chr1	118618021	118618979	P2RY14	0.003997	region304
chr1	118618021	118618979	HLTF	0.02208	region304
chr1	118625078	118625578	HLTF	0.00112	region305
chr1	118625078	118625578	TM4SF1	0.00361	region305
chr1	118625619	118626119	TM4SF1	0.002773	region306
chr1	118808881	118809725	HLTF	0.03805	region307
chr1	118808881	118809725	TM4SF1	0.113364	region307
chr1	118808881	118809725	PLSCR4	0.026124	region307
chr1	118808881	118809725	PLSCR2	0.019416	region307
chr1	118808881	118809725	P2RY14	0.003252	region307
chr1	118817930	118819329	TM4SF1	0.072488	region309
chr1	118817930	118819329	PLSCR4	0.003887	region309
chr1	118817930	118819329	HLTF	0.014553	region309
chr1	118817930	118819329	PLSCR2	0.003199	region309
chr1	118817930	118819329	P2RY14	0.002513	region309
chr1	118962891	118963391	TM4SF1	0.004296	region310
chr1	118962891	118963391	HLTF	0.003345	region310
chr1	118962891	118963391	PLSCR2	0.001916	region310
chr1	118962891	118963391	PLSCR4	0.002319	region310
chr1	118962891	118963391	P2RY14	0.001359	region310
chr1	126134656	126135156	ATR	0.001579	region311
chr1	126192862	126193362	ZBTB38	0.002555	region312
chr1	126192862	126193362	PLSCR2	0.002422	region312
chr1	126192862	126193362	SLC25A36	0.003786	region312
chr1	126192862	126193362	PLSCR4	0.003416	region312
chr1	126192862	126193362	ATR	0.035142	region312
chr1	126193380	126193880	ATR	0.055865	region312
chr1	126193380	126193880	PLSCR2	0.00385	region312
chr1	126193380	126193880	PLSCR4	0.00543	region312
chr1	126193380	126193880	ZBTB38	0.004062	region312
chr1	126193380	126193880	SLC25A36	0.006019	region312
chr1	126386165	126386665	PLSCR4	0.002878	region313
chr1	126386165	126386665	ATR	0.002552	region313
chr1	126990631	126991131	SLC25A36	0.00152	region314
chr1	126990631	126991131	ATR	0.001702	region314
chr1	127455285	127455785	ATR	0.004721	region315
chr1	127455285	127455785	SLC25A36	0.004406	region315
chr1	127455285	127455785	ZBTB38	0.007077	region315
chr1	127457733	127458233	ATR	0.001405	region316
chr1	127457733	127458233	SLC25A36	0.001311	region316
chr1	127457733	127458233	ZBTB38	0.002106	region316
chr1	127585208	127585912	SLC25A36	0.002119	region317
chr1	127585208	127585912	ZBTB38	0.003377	region317
chr1	127585208	127585912	ATR	0.002066	region317
chr1	127617369	127618185	ATR	0.007223	region318
chr1	127617369	127618185	ZBTB38	0.016488	region318
chr1	127617369	127618185	SLC25A36	0.016419	region318
chr1	127618221	127618721	ZBTB38	0.004865	region319
chr1	127618221	127618721	SLC25A36	0.004845	region319
chr1	127618221	127618721	ATR	0.00213	region319
chr1	127618748	127619248	SLC25A36	0.004204	region320
chr1	127618748	127619248	ZBTB38	0.004222	region320
chr1	127618748	127619248	ATR	0.001848	region320
chr1	128033673	128034173	ZBTB38	0.001483	region321
chr1	128033673	128034173	SLC25A36	0.058854	region321
chr1	128033673	128034173	ATR	0.001942	region321
chr1	128035189	128035689	ZBTB38	0.002534	region322
chr1	128035189	128035689	ATR	0.003316	region322
chr1	128035189	128035689	SLC25A36	0.100556	region322
chr1	135008783	135009283	TOPBP1	0.007503	region323
chr1	137176702	137177202	TOPBP1	0.002095	region324
chr1	137176702	137177202	DNAJC13	0.013463	region324
chr1	138856841	138857341	MX1	0.001689	region325
chr1	140677851	140678351	MX2	0.001548	region326
chr1	140677851	140678351	MX1	0.003473	region326
chr1	140677851	140678351	LOC101907799	0.001548	region326
chr1	140677851	140678351	SLC37A1	0.001785	region326
chr1	140678430	140678930	MX1	0.005903	region326
chr1	140678430	140678930	TOPBP1	0.001135	region326
chr1	140678430	140678930	LOC101907799	0.002632	region326
chr1	140678430	140678930	SLC37A1	0.003034	region326
chr1	140678430	140678930	MX2	0.002632	region326
chr1	140679021	140679521	MX1	0.002296	region326
chr1	140679021	140679521	LOC101907799	0.001024	region326
chr1	140679021	140679521	SLC37A1	0.00118	region326
chr1	140679021	140679521	MX2	0.001024	region326
chr1	141350788	141351721	MX2	0.018589	region327
chr1	141350788	141351721	DNAJC13	0.002469	region327
chr1	141350788	141351721	LOC101907799	0.018589	region327
chr1	141350788	141351721	MX1	0.017563	region327
chr1	141350788	141351721	ICOSLG	0.001465	region327
chr1	141350788	141351721	SLC37A1	0.00322	region327
chr1	141621877	141622774	SLC37A1	0.003799	region328
chr1	141621877	141622774	MX2	0.114562	region328
chr1	141621877	141622774	MX1	0.0027	region328
chr1	141621877	141622774	LOC101907799	0.114565	region328
chr1	141780348	141781267	MX2	0.004956	region329
chr1	141780348	141781267	DNAJC13	0.001438	region329
chr1	141780348	141781267	LOC101907799	0.004957	region329
chr1	141780348	141781267	SLC37A1	0.006882	region329
chr1	141780348	141781267	MX1	0.01088	region329
chr1	141780348	141781267	ICOSLG	0.00107	region329
chr1	141976395	141977139	LOC101907799	0.009152	region330
chr1	141976395	141977139	SLC37A1	0.005465	region330
chr1	141976395	141977139	MX2	0.009152	region330
chr1	141976395	141977139	MX1	0.024549	region330
chr1	141976395	141977139	DNAJC13	0.001084	region330
chr1	142153646	142154682	MX1	0.01146	region331
chr1	142153646	142154682	LOC101907799	0.013292	region331
chr1	142153646	142154682	ICOSLG	0.003312	region331
chr1	142153646	142154682	MX2	0.013292	region331
chr1	142153646	142154682	SLC37A1	0.007441	region331
chr1	142153646	142154682	DNAJC13	0.003601	region331
chr1	143132495	143133278	LOC101907799	0.007521	region332
chr1	143132495	143133278	ICOSLG	0.004668	region332
chr1	143132495	143133278	SLC37A1	0.025783	region332
chr1	143132495	143133278	MX2	0.007522	region332
chr1	143132495	143133278	MX1	0.006666	region332
chr1	143133562	143134062	LOC101907799	0.004597	region332
chr1	143133562	143134062	MX2	0.004597	region332
chr1	143133562	143134062	ICOSLG	0.002857	region332
chr1	143133562	143134062	MX1	0.004074	region332
chr1	143133562	143134062	SLC37A1	0.015766	region332
chr1	144223047	144223547	MX2	0.003311	region333
chr1	144223047	144223547	LOC101907799	0.003311	region333
chr1	144223047	144223547	MX1	0.0029	region333
chr1	144223047	144223547	ICOSLG	0.063003	region333
chr1	144223047	144223547	SLC37A1	0.003081	region333
chr1	144223553	144224053	MX1	0.001467	region333
chr1	144223553	144224053	SLC37A1	0.001558	region333
chr1	144223553	144224053	LOC101907799	0.001675	region333
chr1	144223553	144224053	MX2	0.001675	region333
chr1	144223553	144224053	ICOSLG	0.031879	region333
chr1	144224344	144225190	ICOSLG	0.098492	region334
chr1	144224344	144225190	LOC101907799	0.005173	region334
chr1	144224344	144225190	MX1	0.004532	region334
chr1	144224344	144225190	SLC37A1	0.004812	region334
chr1	144224344	144225190	MX2	0.005173	region334
chr1	145436426	145437172	ICOSLG	0.002162	region335
chr1	145436426	145437172	LOC101907799	0.001679	region335
chr1	145436426	145437172	MX2	0.001679	region335
chr1	145436426	145437172	MX1	0.001463	region335
chr1	145436426	145437172	SLC37A1	0.001285	region335
chr1	147036045	147036545	ETS2	0.00211	region338
chr1	147173309	147174118	SLC37A1	0.001117	region342
chr1	147173309	147174118	ETS2	0.001338	region342
chr1	147173309	147174118	ICOSLG	0.001337	region342
chr1	147179478	147180464	ETS2	0.001803	region343
chr1	147179478	147180464	SLC37A1	0.001502	region343
chr1	147179478	147180464	ICOSLG	0.001797	region343
chr1	148053613	148054475	ANKRD28	0.001469	region344
chr1	148128261	148129338	ANKRD28	0.001099	region345
chr1	151131101	151131739	ANKRD28	0.005241	region347
chr1	151131101	151131739	ETS2	0.056414	region347
chr1	151144758	151145258	ANKRD28	0.003618	region349
chr1	151144758	151145258	ANKRD28	0.003618	region348
chr1	151144758	151145258	ETS2	0.019172	region348
chr1	151144758	151145258	ETS2	0.019172	region349
chr1	151145352	151145852	ANKRD28	0.017264	region349
chr1	151145352	151145852	ETS2	0.091485	region349
chr1	151153492	151153992	ETS2	0.012182	region350
chr1	151153492	151153992	ANKRD28	0.002301	region350
chr1	151154060	151154686	ETS2	0.028155	region351
chr1	151154060	151154686	ANKRD28	0.005319	region351
chr1	151154956	151155456	ANKRD28	0.001052	region351
chr1	151154956	151155456	ETS2	0.024052	region351
chr1	151155550	151156050	ETS2	0.019893	region352
chr1	152301546	152302046	ANKRD28	0.001278	region353
chr1	152302433	152302933	ANKRD28	0.001874	region354
chr1	152324018	152324518	ETS2	0.001052	region355
chr1	152324018	152324518	ANKRD28	0.002629	region355
chr1	152324918	152325418	ANKRD28	0.004884	region356
chr1	152324918	152325418	ETS2	0.004543	region356
chr1	152325853	152326353	ETS2	0.007393	region357
chr1	152325853	152326353	ANKRD28	0.007951	region357
chr1	152697829	152698329	ETS2	0.001696	region358
chr1	152697829	152698329	ANKRD28	0.001707	region358
chr1	157302641	157303509	ANKRD28	0.005259	region359
chr10	1142685	1143185	YTHDC2	0.027978	region360
chr10	1142685	1143185	TICAM2	0.002528	region360
chr10	1142685	1143185	TRIM36	0.003479	region360
chr10	1142685	1143185	APC	0.029351	region360
chr10	1698516	1699016	APC	0.001139	region362
chr10	1698516	1699016	YTHDC2	0.001005	region362
chr10	2602469	2602969	TRIM36	0.002958	region363
chr10	2603736	2604236	YTHDC2	0.00122	region364
chr10	2603736	2604236	TRIM36	0.004936	region364
chr10	2603736	2604236	APC	0.001097	region364
chr10	4089062	4089562	TICAM2	0.001641	region365
chr10	4089062	4089562	TRIM36	0.014065	region365
chr10	4089062	4089562	YTHDC2	0.001042	region365
chr10	7088926	7089426	STYX	0.004333	region366
chr10	7088926	7089426	F2RL2	0.001773	region366
chr10	7089711	7090211	STYX	0.002101	region367
chr10	7090440	7090940	STYX	0.002157	region368
chr10	7090977	7091477	STYX	0.001959	region369
chr10	7702633	7703366	F2RL2	0.005516	region370
chr10	7702633	7703366	PAPD4	0.001748	region370
chr10	7702633	7703366	STYX	0.001205	region370
chr10	7702633	7703366	TRIM36	0.002583	region370
chr10	7702633	7703366	TICAM2	0.002359	region370
chr10	7755585	7756085	STYX	0.001332	region371
chr10	7755585	7756085	TICAM2	0.00254	region371
chr10	7755585	7756085	TRIM36	0.002786	region371
chr10	7755585	7756085	F2RL2	0.006023	region371
chr10	7755585	7756085	PAPD4	0.001939	region371
chr10	7852599	7853099	F2RL2	0.068287	region372
chr10	7852599	7853099	TRIM36	0.00153	region372
chr10	7852599	7853099	TICAM2	0.001391	region372
chr10	7852599	7853099	PAPD4	0.001122	region372
chr10	7854369	7854869	F2RL2	0.084165	region373
chr10	7854369	7854869	TICAM2	0.001714	region373
chr10	7854369	7854869	PAPD4	0.001384	region373
chr10	7854369	7854869	TRIM36	0.001885	region373
chr10	7927898	7928398	F2RL2	0.008704	region374
chr10	7927898	7928398	TICAM2	0.001112	region374
chr10	7927898	7928398	TRIM36	0.001225	region374
chr10	7930397	7931337	STYX	0.002104	region375
chr10	7930397	7931337	F2RL2	0.02882	region375
chr10	7930397	7931337	PAPD4	0.003102	region375
chr10	7930397	7931337	DPP8	0.00135	region375
chr10	7930397	7931337	TICAM2	0.003678	region375
chr10	7930397	7931337	TRIM36	0.004055	region375
chr10	8881265	8881765	F2RL2	0.001642	region376
chr10	9824855	9825601	STYX	0.003521	region377
chr10	9824855	9825601	F2RL2	0.004332	region377
chr10	9824855	9825601	DPP8	0.001863	region377
chr10	9824855	9825601	PAPD4	0.006269	region377
chr10	9826393	9826893	STYX	0.001363	region378
chr10	9826393	9826893	F2RL2	0.001675	region378
chr10	9826393	9826893	PAPD4	0.002425	region378
chr10	9827230	9827730	F2RL2	0.00146	region379
chr10	9827230	9827730	STYX	0.001189	region379
chr10	9827230	9827730	PAPD4	0.002114	region379
chr10	11156667	11157328	PAPD4	0.002216	region380
chr10	11156667	11157328	DPP8	0.004688	region380
chr10	11156667	11157328	STYX	0.001909	region380
chr10	11376463	11376963	DPP8	0.002393	region382
chr10	11376463	11376963	PAPD4	0.003653	region382
chr10	11376463	11376963	STYX	0.012151	region382
chr10	11376463	11376963	F2RL2	0.001523	region382
chr10	12549610	12550772	DPP8	0.002888	region383
chr10	12549610	12550772	PIAS1	0.001348	region383
chr10	12549610	12550772	FEM1B	0.001306	region383
chr10	12549610	12550772	STYX	0.003384	region383
chr10	12549610	12550772	PAPD4	0.00238	region383
chr10	12549610	12550772	F2RL2	0.001375	region383
chr10	12715538	12716591	PIAS1	0.002458	region384
chr10	12715538	12716591	STYX	0.005121	region385
chr10	12715538	12716591	PAPD4	0.003793	region384
chr10	12715538	12716591	DPP8	0.004944	region385
chr10	12715538	12716591	DPP8	0.004944	region384
chr10	12715538	12716591	STYX	0.005121	region384
chr10	12715538	12716591	KIF23	0.001484	region385
chr10	12715538	12716591	KIF23	0.001484	region384
chr10	12715538	12716591	F2RL2	0.002283	region385
chr10	12715538	12716591	PAPD4	0.003793	region385
chr10	12715538	12716591	F2RL2	0.002283	region384
chr10	12715538	12716591	PIAS1	0.002458	region385
chr10	12715538	12716591	FEM1B	0.002369	region384
chr10	12715538	12716591	FEM1B	0.002369	region385
chr10	12715538	12716591	UACA	0.001254	region384
chr10	12715538	12716591	UACA	0.001254	region385
chr10	12715538	12716591	LARP6	0.001221	region384
chr10	12715538	12716591	LARP6	0.001221	region385
chr10	12753038	12753538	DPP8	0.003797	region386
chr10	13344191	13344798	PAPD4	0.001282	region387
chr10	13344191	13344798	PIAS1	0.0014	region387
chr10	13344191	13344798	STYX	0.001526	region387
chr10	13344191	13344798	DPP8	0.007707	region387
chr10	13344191	13344798	FEM1B	0.001311	region387
chr10	13519099	13519712	FEM1B	0.001612	region388
chr10	13519099	13519712	DPP8	0.002177	region388
chr10	13519099	13519712	PAPD4	0.001364	region388
chr10	13519099	13519712	PIAS1	0.001743	region388
chr10	13519099	13519712	STYX	0.001587	region388
chr10	13548075	13548917	PAPD4	0.001768	region389
chr10	13548075	13548917	KIF23	0.001173	region389
chr10	13548075	13548917	PIAS1	0.002321	region389
chr10	13548075	13548917	DPP8	0.002781	region389
chr10	13548075	13548917	STYX	0.002049	region389
chr10	13548075	13548917	FEM1B	0.002142	region389
chr10	13553721	13554961	PAPD4	0.009652	region390
chr10	13553721	13554961	KIF23	0.00643	region390
chr10	13553721	13554961	FEM1B	0.011752	region390
chr10	13553721	13554961	DPP8	0.015143	region390
chr10	13553721	13554961	STYX	0.011179	region390
chr10	13553721	13554961	LARP6	0.00488	region390
chr10	13553721	13554961	PIAS1	0.012744	region390
chr10	13553721	13554961	UACA	0.005028	region390
chr10	13622932	13623665	UACA	0.001182	region391
chr10	13622932	13623665	PIAS1	0.003089	region391
chr10	13622932	13623665	PAPD4	0.00219	region391
chr10	13622932	13623665	STYX	0.002517	region391
chr10	13622932	13623665	LARP6	0.001147	region391
chr10	13622932	13623665	DPP8	0.00333	region391
chr10	13622932	13623665	KIF23	0.001524	region391
chr10	13622932	13623665	FEM1B	0.002831	region391
chr10	13638265	13638915	DPP8	0.004528	region395
chr10	13638265	13638915	FEM1B	0.003927	region395
chr10	13638265	13638915	UACA	0.00163	region395
chr10	13638265	13638915	PIAS1	0.00429	region395
chr10	13638265	13638915	STYX	0.003438	region395
chr10	13638265	13638915	LARP6	0.001581	region395
chr10	13638265	13638915	PAPD4	0.002998	region395
chr10	13638265	13638915	KIF23	0.002105	region395
chr10	13639154	13639654	UACA	0.002146	region395
chr10	13639154	13639654	DPP8	0.005956	region395
chr10	13639154	13639654	PIAS1	0.00565	region395
chr10	13639154	13639654	LARP6	0.002082	region395
chr10	13639154	13639654	FEM1B	0.005171	region395
chr10	13639154	13639654	STYX	0.004524	region395
chr10	13639154	13639654	KIF23	0.002772	region395
chr10	13639154	13639654	PAPD4	0.003945	region395
chr10	13639696	13640196	UACA	0.001336	region395
chr10	13639696	13640196	STYX	0.002815	region395
chr10	13639696	13640196	FEM1B	0.00322	region395
chr10	13639696	13640196	PIAS1	0.003518	region395
chr10	13639696	13640196	PAPD4	0.002455	region395
chr10	13639696	13640196	KIF23	0.001726	region395
chr10	13639696	13640196	LARP6	0.001296	region395
chr10	13639696	13640196	DPP8	0.003706	region395
chr10	14731190	14732852	KIF23	0.001901	region396
chr10	14731190	14732852	UACA	0.001195	region396
chr10	14731190	14732852	PIAS1	0.028209	region396
chr10	14731190	14732852	DPP8	0.001435	region396
chr10	14731190	14732852	PAPD4	0.00127	region396
chr10	14731190	14732852	FEM1B	0.003038	region396
chr10	14731190	14732852	MYO9A	0.001099	region396
chr10	14731190	14732852	LARP6	0.008031	region396
chr10	14731190	14732852	STYX	0.001338	region396
chr10	14901102	14901711	KIF23	0.001923	region397
chr10	14901102	14901711	PAPD4	0.009531	region397
chr10	14901102	14901711	STYX	0.001162	region397
chr10	14901102	14901711	LARP6	0.0011	region397
chr10	14901102	14901711	PIAS1	0.065405	region397
chr10	14901102	14901711	DPP8	0.001225	region397
chr10	14901102	14901711	UACA	0.001143	region397
chr10	14901102	14901711	FEM1B	0.018008	region397
chr10	14901102	14901711	MYO9A	0.001033	region397
chr10	15059865	15060704	PIAS1	0.007982	region398
chr10	15059865	15060704	DPP8	0.001195	region398
chr10	15059865	15060704	FEM1B	0.009212	region398
chr10	15059865	15060704	STYX	0.00115	region398
chr10	15059865	15060704	UACA	0.00124	region398
chr10	15059865	15060704	LARP6	0.001192	region398
chr10	15059865	15060704	PAPD4	0.001111	region398
chr10	15059865	15060704	KIF23	0.00222	region398
chr10	15059865	15060704	MYO9A	0.007195	region398
chr10	15060972	15061472	PIAS1	0.002773	region399
chr10	15060972	15061472	MYO9A	0.0025	region399
chr10	15060972	15061472	FEM1B	0.003201	region399
chr10	15061585	15062085	PIAS1	0.002184	region400
chr10	15061585	15062085	MYO9A	0.001969	region400
chr10	15061585	15062085	FEM1B	0.002521	region400
chr10	15436969	15437469	LARP6	0.003288	region401
chr10	15436969	15437469	PIAS1	0.001706	region401
chr10	15436969	15437469	FEM1B	0.001775	region401
chr10	15436969	15437469	KIF23	0.003768	region401
chr10	15437711	15438211	KIF23	0.004107	region401
chr10	15437711	15438211	PIAS1	0.00186	region401
chr10	15437711	15438211	LARP6	0.003585	region401
chr10	15437711	15438211	FEM1B	0.001935	region401
chr10	16349858	16350358	PSME1	0.001396	region402
chr10	16349858	16350358	UACA	0.00308	region402
chr10	16349858	16350358	KIF23	0.002355	region402
chr10	16351700	16352815	FEM1B	0.003237	region403
chr10	16351700	16352815	UACA	0.012371	region403
chr10	16351700	16352815	KHNYN	0.001075	region403
chr10	16351700	16352815	LARP6	0.00295	region403
chr10	16351700	16352815	KIF23	0.009455	region403
chr10	16351700	16352815	STYX	0.001216	region403
chr10	16351700	16352815	MYO9A	0.002132	region403
chr10	16351700	16352815	DPP8	0.001166	region403
chr10	16351700	16352815	PSME1	0.005606	region403
chr10	16351700	16352815	CBLN3	0.001289	region403
chr10	16351700	16352815	PIAS1	0.002732	region403
chr10	16351700	16352815	ADPGK	0.001622	region403
chr10	16594484	16594984	KIF23	0.005579	region404
chr10	16594484	16594984	LARP6	0.001396	region404
chr10	16594484	16594984	UACA	0.004726	region404
chr10	16594484	16594984	FEM1B	0.001104	region404
chr10	16595243	16595743	LARP6	0.00106	region405
chr10	16595243	16595743	UACA	0.003587	region405
chr10	16595243	16595743	KIF23	0.004234	region405
chr10	16596607	16597107	UACA	0.00255	region406
chr10	16596607	16597107	KIF23	0.003008	region406
chr10	16708493	16708993	PIAS1	0.001189	region407
chr10	16708493	16708993	LARP6	0.002018	region407
chr10	16708493	16708993	FEM1B	0.001371	region407
chr10	16708493	16708993	UACA	0.002043	region407
chr10	16708493	16708993	MYO9A	0.00127	region407
chr10	16708493	16708993	KIF23	0.00179	region407
chr10	17623162	17623662	ADPGK	0.002759	region409
chr10	17623162	17623662	LARP6	0.004452	region409
chr10	17623162	17623662	UACA	0.014688	region409
chr10	17623162	17623662	MYO9A	0.003383	region409
chr10	17626094	17626594	LARP6	0.006598	region410
chr10	17626094	17626594	PIAS1	0.001027	region410
chr10	17626094	17626594	UACA	0.0311	region410
chr10	17626094	17626594	KIF23	0.001609	region410
chr10	17626094	17626594	CBLN3	0.00113	region410
chr10	17626094	17626594	MYO9A	0.002412	region410
chr10	17626094	17626594	ADPGK	0.001634	region410
chr10	17626094	17626594	FEM1B	0.001142	region410
chr10	17661007	17662117	UACA	0.076248	region411
chr10	17661007	17662117	KIF23	0.004011	region411
chr10	17661007	17662117	RNF31	0.001417	region411
chr10	17661007	17662117	LARP6	0.02641	region411
chr10	17661007	17662117	FEM1B	0.002872	region411
chr10	17661007	17662117	HOMEZ	0.001995	region411
chr10	17661007	17662117	LRP10	0.001709	region411
chr10	17661007	17662117	ADPGK	0.004228	region411
chr10	17661007	17662117	IRF9	0.001543	region411
chr10	17661007	17662117	MYO9A	0.020539	region411
chr10	17661007	17662117	REC8	0.001837	region411
chr10	17661007	17662117	PIAS1	0.002585	region411
chr10	17661007	17662117	PSME1	0.001625	region411
chr10	17661007	17662117	CBLN3	0.002907	region411
chr10	17661007	17662117	PSME2	0.001417	region411
chr10	17661007	17662117	KHNYN	0.002424	region411
chr10	17681531	17682031	PSME1	0.004326	region412
[truncated: 23,519 more rows]

## Sheet: Random genomic enhancers-genes
Chr	Start	End	Gene	ABC Score	Peak ID
chr1	2970731	2971231	C1H21orf62	0.002732	region5
chr1	2970731	2971231	IL10RB	0.001819	region5
chr1	2970731	2971231	IFNAR1	0.002019	region5
chr1	42070183	42071374	DCBLD2	0.002361	region109
chr1	42070183	42071374	LOC524181	0.001597	region109
chr1	57704352	57704852	ZDHHC23	0.004469	region143
chr1	57704352	57704852	QTRT2	0.001247	region143
chr1	72018138	72018964	SENP5	0.016936	region178
chr1	72018138	72018964	PCYT1A	0.00728	region178
chr1	72018138	72018964	UBXN7	0.006073	region178
chr1	72018138	72018964	ATP13A3	0.004548	region178
chr1	72018138	72018964	SNX4	0.004501	region178
chr1	72018138	72018964	LRCH3	0.004457	region178
chr1	72018138	72018964	CLDN1	0.001928	region178
chr1	72018138	72018964	UMPS	0.002892	region178
chr1	84270429	84271391	SENP2	0.001182	region213
chr1	84270429	84271391	ATP11B	0.006948	region213
chr1	90029384	90030110	ECT2	0.00109	region229
chr1	90029384	90030110	PIK3CA	0.002258	region229
chr1	90029384	90030110	GNB4	0.002345	region229
chr1	97624124	97624917	FNDC3B	0.002265	region242
chr1	97624124	97624917	TNFSF10	0.002962	region242
chr1	97624124	97624917	NCEH1	0.003329	region242
chr1	97624124	97624917	ECT2	0.00367	region242
chr1	97624124	97624917	TNIK	0.003695	region242
chr1	97624124	97624917	PRKCI	0.017483	region242
chr1	97624124	97624917	PHC3	0.019502	region242
chr1	143681078	143681578	MX2	0.001363	region331
chr1	143681078	143681578	LOC101907799	0.001362	region331
chr1	143681078	143681578	SLC37A1	0.003862	region331
chr1	143681078	143681578	ICOSLG	0.001204	region331
chr1	143681078	143681578	MX1	0.001199	region331
chr10	20873247	20873747	KHNYN	0.001788	region400
chr10	20873247	20873747	RNF31	0.001418	region400
chr10	20873247	20873747	PSME2	0.001418	region400
chr10	20873247	20873747	CBLN3	0.001404	region400
chr10	45560289	45560789	CSNK1G1	0.00768	region452
chr10	45560289	45560789	RAB8B	0.005952	region452
chr10	45560289	45560789	VPS13C	0.001685	region452
chr10	45560289	45560789	MAP4K5	0.00164	region452
chr10	45560289	45560789	SAV1	0.001552	region452
chr10	45560289	45560789	MGAT2	0.00104	region452
chr10	61751908	61752408	SECISBP2L	0.007507	region489
chr10	61751908	61752408	SPPL2A	0.005179	region489
chr10	61751908	61752408	MYEF2	0.00232	region489
chr11	19764659	19765159	PRKD3	0.079146	region644
chr11	19764659	19765159	EIF2AK2	0.011297	region644
chr11	19764659	19765159	LOC107132911	0.011295	region644
chr11	19764659	19765159	ATL2	0.001189	region644
chr11	19764659	19765159	HEATR5B	0.007684	region644
chr11	19765161	19765661	PRKD3	0.030697	region644
chr11	19765161	19765661	EIF2AK2	0.004382	region644
chr11	19765161	19765661	LOC107132911	0.004381	region644
chr11	19765161	19765661	HEATR5B	0.00298	region644
chr11	48495060	48496048	KDM3A	0.002004	region711
chr11	73655229	73655729	ASXL2	0.001173	region769
chr11	73655229	73655729	MAPRE3	0.001258	region769
chr11	73655229	73655729	DTNB	0.013067	region769
chr11	87497880	87498582	CMPK2	0.004634	region795
chr11	87497880	87498582	DAB2IP	0.001507	region795
chr11	87497880	87498582	TRIB2	0.004945	region795
chr11	87497880	87498582	ROCK2	0.009852	region795
chr12	15192600	15193100	AKAP11	0.011357	region866
chr12	15192600	15193100	EPSTI1	0.009108	region866
chr12	15192600	15193100	TSC22D1	0.006612	region866
chr12	15192600	15193100	NUFIP1	0.00625	region866
chr12	15192600	15193100	LRCH1	0.004873	region866
chr12	15192600	15193100	DGKH	0.001017	region866
chr12	15282464	15282964	NUFIP1	0.005092	region867
chr12	15282464	15282964	EPSTI1	0.004457	region867
chr12	15282464	15282964	TSC22D1	0.00127	region867
chr12	18046278	18046778	RB1	0.028293	region871
chr12	18046278	18046778	CDADC1	0.001682	region871
chr12	18046278	18046778	LRCH1	0.001339	region871
chr13	38421211	38421711	XRN2	0.01628	region1101
chr13	38421211	38421711	WAC	0.00164	region1101
chr13	51437799	51438299	MAVS	0.001211	region1128
chr14	14583601	14584302	ATAD2	0.001266	region1223
chr14	14583601	14584302	FAM91A1	0.001648	region1223
chr14	14583601	14584302	TRIB1	0.010623	region1223
chr14	14903727	14904227	ATAD2	0.001319	region1225
chr14	14903727	14904227	FAM91A1	0.00179	region1225
chr14	14903727	14904227	TRIB1	0.005822	region1225
chr14	14904693	14905647	TRIB1	0.026751	region1225
chr14	14904693	14905647	ASAP1	0.002181	region1225
chr14	14904693	14905647	FAM49B	0.002725	region1225
chr14	14904693	14905647	MYC	0.002997	region1225
chr14	14904693	14905647	CEBPD	0.004041	region1225
chr14	14904693	14905647	FAM91A1	0.008233	region1225
chr14	14904693	14905647	ATAD2	0.006065	region1225
chr14	19690877	19692768	FAM91A1	0.004359	region1239
chr14	19690877	19692768	ATAD2	0.004353	region1239
chr14	19690877	19692768	IMPAD1	0.007917	region1239
chr14	19690877	19692768	TRIB1	0.002211	region1239
chr14	19690877	19692768	UBXN2B	0.007176	region1239
chr14	19690877	19692768	CEBPD	0.019279	region1239
chr14	37297667	37298167	UBE2W	0.001095	region1275
chr14	47398088	47398942	TNFRSF11B	0.005346	region1297
chr14	47606725	47607225	MAL2	0.003268	region1299
chr14	61895199	61895699	RRM2B	0.004122	region1337
chr14	63064561	63065061	POLR2K	0.003146	region1340
chr14	63064561	63065061	RRM2B	0.002962	region1340
chr14	63206020	63206520	POLR2K	0.04807	region1341
chr14	63206020	63206520	AZIN1	0.010888	region1341
chr14	63206020	63206520	RRM2B	0.006408	region1341
chr14	63206020	63206520	ERICH5	0.002103	region1341
chr14	63206020	63206520	ATP6V1C1	0.003074	region1341
chr14	63206020	63206520	DCSTAMP	0.003293	region1341
chr14	63206020	63206520	STK3	0.004671	region1341
chr15	4028315	4028815	CASP4	0.006704	region1392
chr15	39837552	39838052	PARVA	0.001381	region1466
chr15	39837552	39838052	TEAD1	0.002295	region1466
chr15	39838807	39839307	PARVA	0.001251	region1466
chr15	39838807	39839307	TEAD1	0.002078	region1466
chr15	43462383	43462883	TMEM41B	0.007997	region1469
chr15	43462383	43462883	LOC101903126	0.001775	region1469
chr15	43462383	43462883	SBF2	0.002589	region1469
chr15	43462383	43462883	IPO7	0.002857	region1469
chr15	76343299	76344034	ACP2	0.001797	region1541
chr15	76343299	76344034	FNBP4	0.001698	region1541
chr15	76343299	76344034	NUP160	0.001436	region1541
chr15	76343299	76344034	HSD17B12	0.006131	region1541
chr15	76343299	76344034	TTC17	0.001344	region1541
chr15	76343299	76344034	PTPRJ	0.00103	region1541
chr15	81202294	81203318	PTPRJ	0.002425	region1554
chr15	81202294	81203318	ACP2	0.002879	region1554
chr15	81202294	81203318	NUP160	0.003039	region1554
chr15	81202294	81203318	FNBP4	0.003402	region1554
chr15	81202294	81203318	UBE2L6	0.024049	region1554
chr16	3976816	3977316	PPP1R15B	0.002414	region1569
chr16	3976816	3977316	ELK4	0.001254	region1569
chr16	3976816	3977316	RBBP5	0.00115	region1569
chr16	38479738	38480569	C16H1orf112	0.004047	region1642
chr16	38479738	38480569	PRRC2C	0.003717	region1642
chr16	38479738	38480569	BLZF1	0.001982	region1642
chr16	38479738	38480569	ATP1B1	0.001434	region1642
chr16	38479738	38480569	EXO1	0.001261	region1642
chr16	79375118	79375618	INAVA	0.002581	region1730
chr17	5325566	5326066	FHDC1	0.00115	region1742
chr17	20294793	20295293	TBC1D9	0.002357	region1779
chr17	51971810	51972310	ATP6V0A2	0.00299	region1858
chr17	51971810	51972310	KMT5A	0.001215	region1858
chr17	51972432	51972932	ATP6V0A2	0.005274	region1858
chr17	51972432	51972932	KMT5A	0.002143	region1858
chr17	51972432	51972932	GPN3	0.001398	region1858
chr17	56761624	56762124	WSB2	0.002275	region1872
chr18	10420000	10420785	CDYL2	0.001842	region1938
chr18	10420000	10420785	IRF8	0.001719	region1938
chr18	10420000	10420785	GINS2	0.001636	region1938
chr18	11136873	11137858	CDYL2	0.002016	region1939
chr18	11136873	11137858	GINS2	0.016406	region1939
chr18	11136873	11137858	IRF8	0.003103	region1939
chr18	11136873	11137858	SHCBP1	0.001109	region1939
chr18	11136873	11137858	VPS9D1	0.005258	region1939
chr18	19975666	19976166	SIAH1	0.002075	region1954
chr18	19975666	19976166	NUDT21	0.002132	region1954
chr18	19975666	19976166	MT2A	0.001395	region1954
chr18	19975666	19976166	CYLD	0.00653	region1954
chr18	19975666	19976166	N4BP1	0.013099	region1954
chr18	19975666	19976166	SALL1	0.016565	region1954
chr18	23924878	23925378	NUDT21	0.001536	region1962
chr18	23924878	23925378	MT2A	0.001316	region1962
chr18	43647328	43647828	RHPN2	0.001007	region2016
chr18	55375649	55377104	NECTIN2	0.001154	region2044
chr18	55375649	55377104	BCL3	0.001102	region2044
chr18	55375649	55377104	LOC101904435	0.00304	region2044
chr18	55375649	55377104	RASIP1	0.08405	region2044
chr18	55375649	55377104	LOC100848077	0.003186	region2044
chr18	55375649	55377104	PVR	0.004798	region2044
chr18	55375649	55377104	NUCB1	0.006889	region2044
chr18	55375649	55377104	FLT3LG	0.00729	region2044
chr18	55375649	55377104	IRF3	0.007781	region2044
chr18	55375649	55377104	PLEKHA4	0.01331	region2044
chr18	55375649	55377104	MAMSTR	0.045035	region2044
chr18	62290172	62291427	LOC101904435	0.002304	region2059
chr18	62290172	62291427	LOC100847773	0.001849	region2059
chr18	62290172	62291427	LOC100848077	0.003865	region2059
chr18	62290172	62291427	ZNF543	0.003867	region2059
chr19	15027351	15027919	SLFN11	0.003137	region2092
chr19	15027351	15027919	RFFL	0.005472	region2092
chr19	15027351	15027919	LOC100848263	0.001689	region2092
chr19	22040611	22041111	NXN	0.002957	region2111
chr19	22040611	22041111	SMG6	0.001249	region2111
chr19	23245307	23245807	SMG6	0.005294	region2114
chr19	23245307	23245807	ANKFY1	0.001064	region2114
chr19	23245307	23245807	CRK	0.001062	region2114
chr19	23245307	23245807	CPD	0.001055	region2114
chr19	23245307	23245807	MYH10	0.006197	region2114
chr19	37267890	37268390	KPNB1	0.001029	region2146
chr19	37267890	37268390	CALCOCO2	0.001833	region2146
chr19	37267890	37268390	TBKBP1	0.008038	region2146
chr19	37267890	37268390	SPAG9	0.001019	region2146
chr19	37267890	37268390	ABCC3	0.001479	region2146
chr19	37267890	37268390	TBX21	0.001248	region2146
chr19	40706567	40707067	KPNB1	0.00241	region2159
chr19	40706567	40707067	IFI35	0.002408	region2159
chr19	40706567	40707067	TBKBP1	0.003115	region2159
chr19	40706567	40707067	BRCA1	0.002064	region2159
chr19	40706567	40707067	TMEM106A	0.002054	region2159
chr19	40706567	40707067	CALCOCO2	0.002004	region2159
chr19	40706567	40707067	ABCC3	0.001279	region2159
chr19	40706567	40707067	TBX21	0.002725	region2159
chr19	40706567	40707067	DHX58	0.00305	region2159
chr19	40706567	40707067	CNP	0.003716	region2159
chr19	40706567	40707067	STARD3	0.004971	region2159
chr19	40706567	40707067	MED1	0.005086	region2159
chr19	40706567	40707067	CDK12	0.005323	region2159
chr19	40706567	40707067	STAT3	0.01603	region2159
chr19	49687869	49688369	C19H17orf58	0.00113	region2176
chr19	49688387	49688887	BPTF	0.001098	region2176
chr19	49688387	49688887	C19H17orf58	0.001429	region2176
chr19	49688387	49688887	LOC616254	0.001002	region2176
chr19	53617334	53617834	LGALS3BP	0.001647	region2186
chr19	53617334	53617834	PGS1	0.001504	region2186
chr19	53617334	53617834	SOCS3	0.001496	region2186
chr19	53874283	53875263	SLC25A19	0.002388	region2187
chr19	53874283	53875263	BPTF	0.001376	region2187
chr19	53874283	53875263	C19H17orf58	0.001747	region2187
chr19	53874283	53875263	SOCS3	0.05748	region2187
chr19	53874283	53875263	SEC14L1	0.003564	region2187
chr19	53874283	53875263	LOC509283	0.004585	region2187
chr19	53874283	53875263	LGALS3BP	0.004831	region2187
chr19	53874283	53875263	RHBDF2	0.011358	region2187
chr19	53874283	53875263	PGS1	0.025444	region2187
chr19	55149653	55150153	SLC25A19	0.001307	region2188
chr19	55149653	55150153	PGS1	0.003714	region2188
chr19	55149653	55150153	LGALS3BP	0.00379	region2188
chr19	55149653	55150153	RHBDF2	0.005645	region2188
chr2	28043747	28044247	CERS6	0.00133	region2268
chr2	28043747	28044247	SCN9A	0.001392	region2268
chr2	85256849	85257349	ANKRD44	0.003298	region2408
chr2	85256849	85257349	SF3B1	0.001041	region2408
chr2	93355738	93356238	NRP2	0.001861	region2423
chr2	94121405	94122486	MAP2	0.006436	region2424
chr2	94121405	94122486	RAPH1	0.005389	region2424
chr2	94121405	94122486	CASP8	0.004164	region2424
chr2	94121405	94122486	TRAK2	0.003735	region2424
chr2	94121405	94122486	STRADB	0.003735	region2424
chr2	94121405	94122486	NRP2	0.019739	region2424
chr2	94121405	94122486	BMPR2	0.00329	region2424
chr2	94121405	94122486	CFLAR	0.001993	region2424
chr2	94121405	94122486	METTL21A	0.006901	region2424
chr2	94121405	94122486	INO80D	0.011944	region2424
chr2	95952928	95953428	INO80D	0.006416	region2430
chr2	95952928	95953428	MAP2	0.001759	region2430
chr2	95952928	95953428	METTL21A	0.011841	region2430
chr2	133516379	133516879	KLHDC7A	0.001121	region2503
chr2	134168300	134168800	KLHDC7A	0.002525	region2505
chr20	40118736	40119236	TARS	0.00427	region2582
chr20	40118736	40119236	RICTOR	0.002566	region2582
chr20	40118736	40119236	ZFR	0.001376	region2582
chr20	40118736	40119236	SUB1	0.001216	region2582
chr20	40118736	40119236	RAD1	0.001047	region2582
chr21	8310280	8310780	TTC23	0.00647	region2668
chr21	8310280	8310780	LRRK1	0.002988	region2668
chr21	8310280	8310780	CHSY1	0.001495	region2668
chr21	21182496	21182996	ZNF710	0.001456	region2697
chr21	21182496	21182996	TICRR	0.001086	region2697
chr21	28545636	28546136	LOC112443139	0.002701	region2705
chr21	31618621	31619431	IREB2	0.001016	region2711
chr21	69156893	69157589	PPP1R13B	0.002085	region2784
chr21	69156893	69157589	EIF5	0.00146	region2784
chr21	69156893	69157589	LOC112443175	0.00111	region2784
chr22	13643372	13643872	IL17RC	0.001281	region2813
chr22	36909685	36910185	TMF1	0.001049	region2867
chr23	10523229	10523729	LOC618733	0.001076	region2935
chr23	10523229	10523729	FKBP5	0.009909	region2935
chr23	10523229	10523729	PPARD	0.001753	region2935
chr23	10523229	10523729	BOLA-DMA	0.004496	region2935
chr23	10523229	10523729	FAM83B	0.001042	region2935
chr23	10523229	10523729	SRPK1	0.002728	region2935
chr23	16741029	16742180	CD2AP	0.001462	region2949
chr23	16741029	16742180	TNFRSF21	0.002027	region2949
chr23	16741029	16742180	TBCC	0.004037	region2949
chr23	16741029	16742180	RUNX2	0.004484	region2949
chr23	16741029	16742180	CDC5L	0.004615	region2949
chr23	16741029	16742180	POLH	0.013136	region2949
chr23	25554493	25554993	LOC100848815	0.003613	region2967
chr23	25554493	25554993	BLA-DQB	0.00357	region2967
chr23	25554493	25554993	BOLA-DRA	0.001551	region2967
chr23	30950441	30951688	BoLA	0.001073	region2976
chr23	30950441	30951688	BOLA	0.001014	region2976
chr23	30950441	30951688	LOC786065	0.001078	region2976
chr23	30950441	30951688	MGC126945	0.001153	region2976
chr23	30950441	30951688	LOC512672	0.001236	region2976
chr23	30950441	30951688	LOC785873	0.001242	region2976
chr23	30950441	30951688	LOC616942	0.001001	region2976
chr23	30950441	30951688	BOLA-NC1	0.001543	region2976
chr23	30950441	30951688	MRS2	0.001604	region2976
chr23	30950441	30951688	JSP.1	0.001727	region2976
chr23	30950441	30951688	DCDC2	0.001748	region2976
chr23	30950441	30951688	TRIM38	0.008126	region2976
chr23	49683333	49684991	BLOC1S5	0.001538	region3009
chr23	49683333	49684991	RIPK1	0.00156	region3009
chr23	49683333	49684991	NQO2	0.001825	region3009
chr23	49683333	49684991	SERPINB6	0.002035	region3009
chr23	49683333	49684991	TFAP2A	0.015243	region3009
chr24	19846503	19847216	SLC39A6	0.004632	region3063
chr24	19846503	19847216	ZNF397	0.003767	region3063
chr24	37171213	37171713	LPIN2	0.005709	region3100
chr24	54524600	54525100	C24H18orf54	0.001946	region3140
chr24	54524600	54525100	MBD2	0.001464	region3140
chr24	54524600	54525100	POLI	0.001157	region3140
chr25	10233711	10234211	SOCS1	0.013667	region3180
chr25	10233711	10234211	C25H16orf72	0.00751	region3180
chr25	10233711	10234211	RSL1D1	0.002848	region3180
chr25	10233711	10234211	CIITA	0.00209	region3180
chr25	10233711	10234211	CARHSP1	0.001372	region3180
chr25	20034926	20035532	ARHGAP17	0.002742	region3201
chr25	20034926	20035532	EARS2	0.002496	region3201
chr25	20034926	20035532	ANKS4B	0.001614	region3201
chr25	20034926	20035532	USP31	0.001334	region3201
chr25	20034926	20035532	DCUN1D3	0.001103	region3201
chr25	20034926	20035532	LYRM1	0.001102	region3201
chr25	26612101	26613003	MVP	0.005252	region3219
chr25	26612101	26613003	SBDS	0.001755	region3219
chr25	26612101	26613003	IL4R	0.001394	region3219
chr25	26612101	26613003	ARHGAP17	0.001139	region3219
chr26	10643116	10643616	IFIT5	0.042715	region3284
chr26	10643116	10643616	CEP55	0.001021	region3284
chr26	10643116	10643616	FFAR4	0.001082	region3284
chr26	10643116	10643616	IDE	0.001513	region3284
chr26	10643116	10643616	KIF11	0.001582	region3284
chr26	10643116	10643616	BTAF1	0.002363	region3284
chr26	10643116	10643616	PCGF5	0.002624	region3284
chr26	10643116	10643616	TNKS2	0.002855	region3284
chr26	10643116	10643616	SGMS1	0.00334	region3284
chr26	10643116	10643616	IFIT2	0.005258	region3284
chr26	10643116	10643616	IFIT3	0.011856	region3284
chr26	10643116	10643616	LOC100139670	0.011856	region3284
chr26	10643116	10643616	FAS	0.050452	region3284
chr26	21138788	21139445	SLC25A28	0.002421	region3310
chr26	21138788	21139445	SLK	0.010844	region3310
chr26	21138788	21139445	R3HCC1L	0.001431	region3310
chr26	21138788	21139445	PPRC1	0.00114	region3310
chr26	21138788	21139445	LOC101905041	0.001135	region3310
chr26	21138788	21139445	PAOX	0.001128	region3310
chr26	21138788	21139445	SH3PXD2A	0.001033	region3310
chr26	48762611	48763111	EBF3	0.003991	region3372
chr27	15024339	15025069	CDKN2AIP	0.006133	region3418
chr27	15024339	15025069	CYP4V2	0.001991	region3418
chr27	15024339	15025069	SORBS2	0.001985	region3418
chr27	15024339	15025069	ING2	0.001942	region3418
chr27	15024339	15025069	F11	0.001792	region3418
chr27	20387674	20388174	ZDHHC2	0.001245	region3426
chr27	37444406	37444906	SMIM19	0.002303	region3447
chr27	37444406	37444906	SLC20A2	0.002303	region3447
chr27	37444406	37444906	HOOK3	0.001185	region3447
chr29	48272415	48272915	IRF7	0.001964	region3661
chr3	19442366	19443345	RFX5	0.017742	region3706
chr3	19442366	19443345	POGZ	0.003571	region3706
chr3	35318847	35319347	GPSM2	0.00125	region3738
chr3	35318847	35319347	STXBP3	0.003335	region3738
chr3	35318847	35319347	WDR47	0.001264	region3738
chr3	35318847	35319347	LOC534742	0.001376	region3738
chr3	35319487	35319987	WDR47	0.003872	region3738
chr3	35319487	35319987	AHCYL1	0.001693	region3738
chr3	35319487	35319987	DENND2D	0.002122	region3738
chr3	35319487	35319987	CSF1	0.002137	region3738
chr3	35319487	35319987	GPSM2	0.003828	region3738
chr3	35319487	35319987	LOC534742	0.004215	region3738
chr3	35319487	35319987	DRAM2	0.001313	region3738
chr3	35319487	35319987	STXBP3	0.010214	region3738
chr3	45407928	45408428	MFSD14A	0.005177	region3768
chr3	45407928	45408428	SLC30A7	0.003287	region3768
chr3	51316766	51317266	LOC781710	0.001751	region3781
chr3	51316766	51317266	GBP4	0.001354	region3781
chr3	51316766	51317266	DR1	0.00185	region3781
chr3	51316766	51317266	EVI5	0.001905	region3781
chr3	51316766	51317266	PKN2	0.001558	region3781
chr3	51316766	51317266	LOC511531	0.001544	region3781
chr3	51316766	51317266	LOC507055	0.001544	region3781
chr3	51316766	51317266	LOC513659	0.001485	region3781
chr3	51316766	51317266	GCLM	0.001468	region3781
chr3	51316766	51317266	LOC512486	0.001448	region3781
chr3	51316766	51317266	GBP5	0.008594	region3781
chr3	51316766	51317266	LOC100336669	0.0014	region3781
chr3	51316766	51317266	LRRC8C	0.001375	region3781
chr3	51316766	51317266	GTF2B	0.001361	region3781
chr3	77409810	77410310	DEPDC1	0.007062	region3833
chr3	77409810	77410310	MIER1	0.006746	region3833
chr3	77409810	77410310	GNG12	0.004392	region3833
chr3	77409810	77410310	WLS	0.016562	region3833
chr3	84335511	84336214	LOC101906730	0.007485	region3850
chr3	84335511	84336214	DOCK7	0.004125	region3850
chr3	93801275	93801775	TTC4	0.001164	region3869
chr3	93801275	93801775	USP24	0.001263	region3869
chr3	93801275	93801775	LRP8	0.002067	region3869
chr3	93801275	93801775	SCP2	0.006384	region3869
chr3	93801956	93802704	PRKAA2	0.001555	region3869
chr3	93801956	93802704	TTC4	0.002189	region3869
chr3	93801956	93802704	USP24	0.002374	region3869
chr3	93801956	93802704	SCP2	0.012009	region3869
chr3	93801956	93802704	LRP8	0.003888	region3869
chr3	94664557	94665057	LRP8	0.001824	region3873
chr3	94664557	94665057	SCP2	0.002298	region3873
chr3	94664557	94665057	USP24	0.001418	region3873
chr3	94664557	94665057	TTC4	0.001256	region3873
chr3	107060243	107061468	SMAP2	0.020329	region3900
chr3	107060243	107061468	STK40	0.013346	region3900
chr3	107060243	107061468	YRDC	0.007707	region3900
chr3	107060243	107061468	RLF	0.006456	region3900
chr3	107060243	107061468	RIMS3	0.005289	region3900
chr3	107060243	107061468	ZMYM1	0.003861	region3900
chr3	107060243	107061468	HIVEP3	0.003579	region3900
chr3	107060243	107061468	MAP7D1	0.002477	region3900
chr3	107060243	107061468	FOXJ3	0.002224	region3900
chr4	12178740	12179240	PEG10	0.006606	region3956
chr4	12178740	12179240	ANKIB1	0.001389	region3956
chr4	12178740	12179240	VPS50	0.00261	region3956
chr4	12894625	12896036	PEG10	0.011498	region3959
chr4	12894625	12896036	ANKIB1	0.001279	region3959
chr4	12894625	12896036	SAMD9	0.00183	region3959
chr4	12894625	12896036	VPS50	0.001884	region3959
chr4	12894625	12896036	PDK4	0.070532	region3959
chr4	51836933	51837433	MET	0.002405	region4031
chr4	56318454	56318954	2022-09-07	0.003446	region4042
chr4	56318454	56318954	DOCK4	0.007693	region4042
chr4	100892221	100892721	TRIM24	0.002359	region4141
chr4	100892221	100892721	TMEM140	0.001454	region4141
chr4	100892221	100892721	ZC3HAV1	0.001394	region4141
chr4	100892221	100892721	MTPN	0.004017	region4141
chr4	100892221	100892721	PARP12	0.001081	region4141
chr4	118296034	118297384	WDR60	0.002832	region4166
chr4	118296034	118297384	VIPR2	0.003429	region4166
chr5	13954620	13955330	C5H12orf29	0.001552	region4204
chr5	13954620	13955330	TMTC2	0.00412	region4204
chr5	23015583	23016083	SOCS2	0.002653	region4225
chr5	23015583	23016083	NUDT4	0.005207	region4225
chr5	75988160	75989109	IL2RB	0.002992	region4346
chr5	75988160	75989109	LOC515697	0.001143	region4346
chr5	75988160	75989109	KIAA1551	0.001241	region4346
chr5	75988160	75989109	APOL3	0.001317	region4346
chr5	75988160	75989109	YARS2	0.002618	region4346
chr5	75988160	75989109	LOC510185	0.002337	region4346
chr5	78284914	78285414	FGFR1OP2	0.001639	region4352
chr5	78284914	78285414	STK38L	0.001989	region4352
chr5	78284914	78285414	PPFIBP1	0.001677	region4352
chr5	78284914	78285414	LOC510185	0.002484	region4352
chr5	78284914	78285414	APOL3	0.001418	region4352
chr5	78284914	78285414	LOC515697	0.001362	region4352
chr5	78284914	78285414	LOC518495	0.001039	region4352
chr5	78284914	78285414	KIAA1551	0.037639	region4352
chr5	78284914	78285414	IL2RB	0.003156	region4352
chr5	78284914	78285414	YARS2	0.020689	region4352
chr5	81850415	81851393	BCAT1	0.002966	region4362
chr5	81850415	81851393	STK38L	0.006431	region4362
chr5	81850415	81851393	KIAA1551	0.001542	region4362
chr5	81850415	81851393	FGFR1OP2	0.005462	region4362
chr5	81850415	81851393	YARS2	0.001723	region4362
chr5	81850415	81851393	PPFIBP1	0.005093	region4362
chr5	97007819	97008319	A2ML1	0.002267	region4396
chr5	97007819	97008319	GABARAPL1	0.002984	region4396
chr5	97007819	97008319	LOC100297676	0.00334	region4396
chr5	97007819	97008319	EPS8	0.017625	region4396
chr5	97007819	97008319	EMP1	0.006853	region4396
chr5	97007819	97008319	GPRC5A	0.05838	region4396
chr5	97007819	97008319	FOXJ2	0.001589	region4396
chr5	97007819	97008319	DUSP16	0.00552	region4396
chr5	97007819	97008319	ETV6	0.004609	region4396
chr5	97757478	97757978	ETV6	0.005621	region4405
chr5	97757478	97757978	EMP1	0.001418	region4405
chr5	97757478	97757978	DUSP16	0.001244	region4405
chr5	97757478	97757978	GPRC5A	0.001161	region4405
chr5	100093267	100093767	GABARAPL1	0.001647	region4410
chr5	100093267	100093767	LOC100297676	0.001673	region4410
chr5	110829067	110830209	MAFF	0.002405	region4433
chr5	110829067	110830209	MGAT3	0.007391	region4433
chr6	5831351	5831851	PDE5A	0.011745	region4461
chr6	5831351	5831851	USP53	0.001723	region4461
chr6	15273561	15274061	FAM241A	0.002255	region4486
chr6	15273561	15274061	AIMP1	0.001404	region4486
chr6	15273561	15274061	SGMS2	0.001549	region4486
chr6	15273561	15274061	SEC24B	0.006253	region4486
chr6	36710886	36711386	HERC5	0.002884	region4519
chr6	36710886	36711386	HERC6	0.002433	region4519
chr6	44998419	44998919	SEPSECS	0.001751	region4540
chr6	60097604	60098104	FAM114A1	0.001391	region4587
chr6	60097604	60098104	UGDH	0.001484	region4587
chr6	60097604	60098104	PDS5A	0.002289	region4587
chr6	60097604	60098104	APBB2	0.043239	region4587
chr6	60097604	60098104	ARAP2	0.001647	region4587
chr6	69053543	69054043	SCFD2	0.004844	region4603
chr6	88318333	88318833	RASSF6	0.003745	region4636
chr6	88318333	88318833	SDAD1	0.001744	region4636
chr6	88318333	88318833	EREG	0.002643	region4636
chr6	88318333	88318833	SLC4A4	0.010652	region4636
chr6	88318333	88318833	UBA6	0.002679	region4636
chr6	88318333	88318833	SCARB2	0.001086	region4636
chr6	88318333	88318833	2022-09-11	0.001011	region4636
chr6	109189056	109189556	HS3ST1	0.001004	region4675
chr7	6577713	6578605	LOC112441507	0.005924	region4702
chr7	6577713	6578605	LOC100298356	0.005477	region4702
chr7	6577713	6578605	ZNF879	0.003095	region4702
chr7	6577713	6578605	CANX	0.00287	region4702
chr7	6577713	6578605	ZNF333	0.002091	region4702
chr7	15097675	15098665	NFIX	0.001104	region4732
chr7	15097675	15098665	LDLR	0.00138	region4732
chr7	15097675	15098665	C7H19orf66	0.002221	region4732
chr7	15627250	15628124	C7H19orf66	0.001117	region4734
chr7	15627250	15628124	LDLR	0.005045	region4734
chr7	19716273	19717206	C3	0.001022	region4738
chr7	19716273	19717206	FNIP1	0.001075	region4738
chr7	19716273	19717206	TNFSF9	0.001179	region4738
chr7	19716273	19717206	CDC42SE2	0.001249	region4738
chr7	19716273	19717206	TRIP10	0.00126	region4738
chr7	19716273	19717206	GPR108	0.001261	region4738
chr7	19716273	19717206	MFSD12	0.004797	region4738
chr7	19743355	19744898	TNFSF9	0.002155	region4739
chr7	19743355	19744898	LDLR	0.001097	region4739
chr7	19743355	19744898	MFSD12	0.00323	region4739
chr7	19743355	19744898	CDC42SE2	0.00233	region4739
chr7	19743355	19744898	SLC22A5	0.001431	region4739
chr7	19743355	19744898	C3	0.001871	region4739
chr7	19743355	19744898	FNIP1	0.002008	region4739
chr7	19743355	19744898	GPR108	0.002309	region4739
chr7	19743355	19744898	TRIP10	0.002306	region4739
chr7	22507527	22508291	SLC12A2	0.001406	region4745
chr7	22507527	22508291	SLC22A5	0.001952	region4745
chr7	22507527	22508291	GRAMD2B	0.002381	region4745
chr7	22507527	22508291	FNIP1	0.010172	region4745
chr7	22507527	22508291	MFSD12	0.001096	region4745
chr7	22507527	22508291	CDC42SE2	0.013199	region4745
chr7	22507527	22508291	IRF1	0.001055	region4745
chr7	95129893	95130393	TTC37	0.003288	region4908
chr7	95129893	95130393	RHOBTB3	0.007129	region4908
chr7	95129893	95130393	GLRX	0.024065	region4908
chr8	8549022	8549522	CCDC25	0.001162	region4965
chr8	39352569	39353069	CD274	0.001596	region5027
chr8	44568590	44569090	TJP2	0.006928	region5039
chr8	44568590	44569090	DOCK8	0.006198	region5039
chr8	44568590	44569090	ZFAND5	0.003301	region5039
chr8	44568590	44569090	ANXA1	0.001864	region5039
chr8	44568590	44569090	AK3	0.001769	region5039
chr8	44568590	44569090	GLIS3	0.001607	region5039
chr8	77295160	77295969	KIF27	0.001405	region5115
chr8	94840664	94841164	AKAP2	0.001958	region5151
chr8	94840664	94841164	FKTN	0.001746	region5151
chr8	110867122	110867622	FAM110C	0.004131	region5189
chr8	110867122	110867622	LOC100848863	0.003967	region5189
chr8	110867122	110867622	TLR4	0.001828	region5189
chr9	11758786	11759286	TMEM30A	0.001115	region5231
chr9	19265779	19266279	PHIP	0.009464	region5249
chr9	19265779	19266279	DOPEY1	0.001368	region5249
chr9	19265779	19266279	TMEM30A	0.001383	region5249
chr9	28439665	28440165	GJA1	0.002133	region5280
chr9	28439665	28440165	RNF217	0.001286	region5280
chr9	28439665	28440165	MAN1A1	0.001428	region5280
chr9	39241922	39242422	TRAF3IP2	0.001139	region5306
chr9	39241922	39242422	LAMA4	0.002191	region5306
chr9	39241922	39242422	CDC40	0.002024	region5306
chr9	50447706	50448206	ASCC3	0.002657	region5330
chr9	50447706	50448206	MANEA	0.001427	region5330
chr9	50447706	50448206	UFL1	0.001355	region5330
chr9	69487240	69487740	CEP162	0.001208	region5370
chr9	69487240	69487740	LOC101907581	0.001208	region5370
chr9	69487240	69487740	AKAP7	0.012189	region5370
chr9	69487240	69487740	MED23	0.003964	region5370
chr9	69487240	69487740	PTPRK	0.001345	region5370
chr9	75965595	75966319	NHSL1	0.00306	region5385
chr9	75965595	75966319	TNFAIP3	0.006221	region5385
chr9	76274601	76275101	TNFAIP3	0.037144	region5386
chr9	76274601	76275101	HIVEP2	0.003396	region5386
chr9	76274601	76275101	BCLAF1	0.005493	region5386
chr9	76274601	76275101	NHSL1	0.051691	region5386
chr9	76274601	76275101	SGK1	0.002516	region5386
chr9	79086657	79087157	HIVEP2	0.00307	region5395
chr9	93450151	93450775	WTAP	0.001298	region5429
chr9	93450151	93450775	SOD2	0.001442	region5429
chr9	93450151	93450775	TMEM242	0.002932	region5429
chrX	7059298	7059911	XIAP	0.016552	region5667
chrX	7059298	7059911	WDR44	0.002402	region5667
chrX	30648449	30648949	FMR1	0.026411	region5721
chrX	130260618	130261369	NHS	0.003952	region5913
chrX	135636477	135636977	ZBED1	0.001453	region5928
