# Supplementary material for: Ruminant-specific retrotransposons shape regulatory evolution of bovine immunity
Source: HighWire-hosted journal article supplement (doi:10.1101/gr.276241.121), 2022-08-01
Supplement: Supplemental_Table_S7.xlsx [file Supplemental_Table_S7.xlsx]

## Sheet: Description
Supplemental Table S7
TE-derived IFNG-inducible, IFNG-downregulated, and nonresponsive H3K27ac peaks by family
Sheets
IFNG-inducible H3K27ac TEs	TEs marked by IFNG-inducible H3K27ac peaks (FDR<0.05, log2 fold change>0)
IFNG-downregulated H3K27ac TEs	TEs marked by IFNG-downregulated H3K27ac peaks (baseMean>100, FDR<0.05, log2 fold change<0)
Nonresponsive H3K27ac TEs	TEs marked by nonresponsive H3K27ac peaks (FDR>0.90, abs(log2 fold change)<0.05)
Description of columns
Chromosome	TE chromosome
Start	TE start coordinate
End	TE end coordinate
Strand	TE strand
Family	TE family
Class	TE class
Peak chromosome	Peak chromosome
Peak start	Peak start coordinate
Peak end	Peak end coordinate

## Sheet: IFNG-inducible H3K27ac TEs
Chromosome	Start	End	Strand	Family	Class	Peak chromosome	Peak start	Peak end
chr1	936982	937201	-	ERV1-1B-LTR_BT	LTR	chr1	936485	937640
chr1	2343981	2344062	+	MER45B	DNA	chr1	2342576	2351001
chr1	2369424	2369745	-	MER41_BT	LTR	chr1	2365570	2372233
chr1	6849023	6849301	+	MLT1L	LTR	chr1	6841721	6862050
chr1	6866591	6867924	+	BovB	LINE	chr1	6867616	6868418
chr1	6968929	6969255	+	CHR-2	SINE	chr1	6967363	6970444
chr1	7862294	7863091	+	L1MA9	LINE	chr1	7861096	7863289
chr1	10651720	10651899	+	Bov-tA2	SINE	chr1	10650963	10653827
chr1	19550985	19551120	+	Bov-A2	SINE	chr1	19549671	19551832
chr1	21924936	21925110	-	MIR3	SINE	chr1	21924169	21926490
chr1	22103357	22103624	+	Bov-A2	SINE	chr1	22102227	22104579
chr1	35095948	35096287	+	MLT1A0	LTR	chr1	35095700	35096904
chr1	38360248	38360450	-	Bov-tA2	SINE	chr1	38359175	38361902
chr1	43127309	43127581	+	Bov-A2	SINE	chr1	43126964	43128311
chr1	43939068	43939268	-	Bov-tA2	SINE	chr1	43938585	43939677
chr1	44307079	44307245	+	Bov-A2	SINE	chr1	44307064	44307622
chr1	49405860	49406329	-	MLT1F2	LTR	chr1	49404957	49406720
chr1	52641080	52641241	+	Tigger19b	DNA	chr1	52640327	52645038
chr1	52679632	52680149	-	LTR39_BT	LTR	chr1	52679272	52680987
chr1	52890709	52890980	+	Bov-A2	SINE	chr1	52890280	52891621
chr1	53070217	53070339	-	MLT1F	LTR	chr1	53069283	53071208
chr1	53140390	53140664	+	Bov-A2	SINE	chr1	53139865	53142534
chr1	55590239	55590402	-	MamRep605b	LTR?	chr1	55589467	55590956
chr1	55917202	55917460	+	Bov-A2	SINE	chr1	55915747	55918249
chr1	56632223	56632417	-	MLT1I	LTR	chr1	56627962	56632998
chr1	56944951	56945488	+	L1ME1	LINE	chr1	56943506	56945192
chr1	57453385	57453650	+	Bov-A2	SINE	chr1	57451537	57454044
chr1	58257387	58257592	+	Bov-tA3	SINE	chr1	58256427	58258532
chr1	58257471	58257624	+	Bov-A2	SINE	chr1	58256427	58258532
chr1	58416298	58416452	+	Bov-A2	SINE	chr1	58415920	58417415
chr1	58516716	58516988	-	Bov-A2	SINE	chr1	58516231	58517281
chr1	58543037	58543306	-	Bov-A2	SINE	chr1	58541911	58543554
chr1	58809846	58810031	+	Bov-tA2	SINE	chr1	58809617	58810810
chr1	59047920	59047942	+	Bov-A2	SINE	chr1	59047420	59048767
chr1	64698123	64698191	+	L2d	LINE	chr1	64698026	64700013
chr1	70362954	70363226	+	Bov-A2	SINE	chr1	70362021	70365277
chr1	70961049	70961249	-	Bov-tA2	SINE	chr1	70960289	70962306
chr1	71091595	71091891	-	Bov-A2	SINE	chr1	71090021	71093408
chr1	71392239	71392509	+	Bov-A2	SINE	chr1	71392160	71392747
chr1	71911294	71911718	+	L3	LINE	chr1	71910489	71914030
chr1	72358578	72358824	-	Bov-A2	SINE	chr1	72357097	72359517
chr1	72977947	72978332	-	MamRep605b	LTR?	chr1	72975012	72978982
chr1	73070751	73070890	-	Bov-A2	SINE	chr1	73068999	73071805
chr1	77026846	77027125	-	MamRTE1	LINE	chr1	77025121	77027735
chr1	77293972	77294103	+	Bov-A2	SINE	chr1	77291979	77294789
chr1	77974323	77974517	-	Bov-tA3	SINE	chr1	77974075	77974867
chr1	78996145	78996345	+	Bov-tA2	SINE	chr1	78989181	78999520
chr1	79028963	79029135	-	Bov-tA2	SINE	chr1	79026826	79031458
chr1	79781614	79781645	+	MIR3	SINE	chr1	79780758	79782537
chr1	80089657	80089907	-	Bov-A2	SINE	chr1	80089377	80090113
chr1	80093319	80093508	-	MLT1G1	LTR	chr1	80092664	80094942
chr1	81460954	81461021	+	Bov-tA3	SINE	chr1	81459017	81461768
chr1	81470960	81471230	-	Bov-A2	SINE	chr1	81470509	81471244
chr1	83157205	83157469	+	Bov-A2	SINE	chr1	83156552	83159369
chr1	83213500	83213918	-	MLT1J2	LTR	chr1	83210676	83214420
chr1	86086619	86086725	+	SINE2-2_BT	SINE	chr1	86086166	86088641
chr1	88772958	88773173	+	Bov-tA1	SINE	chr1	88772658	88773421
chr1	90094173	90094328	+	Bov-A2	SINE	chr1	90091007	90095549
chr1	90097700	90097776	+	MIR3	SINE	chr1	90097233	90098482
chr1	93715259	93715465	+	Bov-tA2	SINE	chr1	93715071	93716366
chr1	94937362	94937469	+	Bov-tA2	SINE	chr1	94936369	94939429
chr1	94951366	94951551	-	Bov-tA2	SINE	chr1	94950647	94951932
chr1	95550480	95550606	+	AmnSINE1	SINE	chr1	95547277	95552884
chr1	96085701	96085986	-	L2c	LINE	chr1	96084957	96087181
chr1	96407145	96407416	-	Bov-A2	SINE	chr1	96406216	96409271
chr1	97147388	97147587	+	Bov-tA2	SINE	chr1	97145624	97148800
chr1	97213859	97214060	-	Bov-tA3	SINE	chr1	97213254	97214736
chr1	107576101	107576303	-	Bov-tA2	SINE	chr1	107574319	107577816
chr1	110704287	110704594	-	Bov-A2	SINE	chr1	110703914	110704788
chr1	111857634	111857838	+	Bov-tA3	SINE	chr1	111857298	111858630
chr1	112776683	112777221	+	MLT1K	LTR	chr1	112776475	112777740
chr1	117617715	117617984	+	Bov-A2	SINE	chr1	117617164	117618636
chr1	117800588	117800998	+	LTR16B1	LTR	chr1	117800119	117802040
chr1	118001093	118001417	-	ERV1-1B-LTR_BT	LTR	chr1	118000975	118002030
chr1	126134740	126134917	+	Bov-tA2	SINE	chr1	126134297	126135741
chr1	126193509	126193845	+	L2	LINE	chr1	126191697	126194587
chr1	126386222	126386420	+	Bov-tA2	SINE	chr1	126384495	126387321
chr1	126990682	126990886	+	Bov-tA3	SINE	chr1	126990247	126992080
chr1	127455487	127455671	-	Bov-tA2	SINE	chr1	127453446	127458636
chr1	137176872	137176968	+	Bov-A2	SINE	chr1	137176220	137177382
chr1	138856972	138857236	+	Bov-A2	SINE	chr1	138856634	138857877
chr1	141622354	141622539	+	Bov-tA2	SINE	chr1	141622098	141622822
chr1	141780857	141781038	-	Bov-A2	SINE	chr1	141780226	141782100
chr1	143132735	143133456	-	ERV1-1C-LTR_BT	LTR	chr1	143130339	143135428
chr1	145589301	145590048	-	L1MD1	LINE	chr1	145589520	145590689
chr1	147036294	147036475	-	Bov-tA2	SINE	chr1	147035652	147036974
chr1	147103348	147103618	+	Bov-A2	SINE	chr1	147101246	147104055
chr1	147135946	147136140	-	Bov-tA2	SINE	chr1	147134798	147137051
chr1	147164966	147165095	+	Bov-A2	SINE	chr1	147164108	147166593
chr1	148053657	148053929	-	Bov-A2	SINE	chr1	148052759	148054829
chr1	148128932	148129096	+	ERV3-16A3_I-int	LTR	chr1	148128388	148130690
chr1	149615981	149616242	+	Bov-A2	SINE	chr1	149613443	149617000
chr1	151145516	151145723	+	L3	LINE	chr1	151144516	151146480
chr1	151153686	151153956	+	Bov-A2	SINE	chr1	151153554	151156338
chr1	152302587	152302658	+	MLT1J	LTR	chr1	152301627	152303606
chr10	2604051	2604118	-	Bov-tA3	SINE	chr10	2602780	2604491
chr10	4089263	4089375	+	MIR3	SINE	chr10	4089036	4090176
chr10	7703060	7703194	-	Bov-tA2	SINE	chr10	7700726	7705584
chr10	8881354	8881571	-	Bov-A2	SINE	chr10	8880129	8881871
chr10	12753066	12753337	-	Bov-A2	SINE	chr10	12752431	12754166
chr10	13519222	13519363	+	Bov-A2	SINE	chr10	13518766	13520323
chr10	14901434	14901473	+	Bov-tA2	SINE	chr10	14900640	14902377
chr10	17661514	17661650	-	Bov-A2	SINE	chr10	17658862	17664017
chr10	17661533	17661731	-	Bov-tA2	SINE	chr10	17658862	17664017
chr10	17972424	17972820	+	MLT1J2	LTR	chr10	17971220	17973291
chr10	20043817	20043965	-	MIRc	SINE	chr10	20042475	20044595
chr10	25903495	25903761	+	Bov-A2	SINE	chr10	25902693	25904154
chr10	30075824	30076027	-	Bov-tA2	SINE	chr10	30075028	30077630
chr10	34945458	34945928	-	MLT2B2	LTR	chr10	34944915	34947040
chr10	36182988	36183035	+	BovB	LINE	chr10	36181846	36185124
chr10	37373280	37373552	+	Bov-A2	SINE	chr10	37373320	37373798
chr10	37583578	37583849	-	Bov-A2	SINE	chr10	37581369	37586504
chr10	37815371	37815606	+	BovB	LINE	chr10	37814195	37817654
chr10	38171318	38171692	+	MLT1F	LTR	chr10	38170719	38172585
chr10	38493949	38494135	+	Bov-tA2	SINE	chr10	38493791	38494441
chr10	43357622	43357892	+	Bov-A2	SINE	chr10	43357441	43358614
chr10	44396702	44396868	-	L2c	LINE	chr10	44395240	44397403
chr10	44536485	44536758	-	Bov-A2	SINE	chr10	44535042	44536941
chr10	44710203	44710550	-	MamRep605	LTR?	chr10	44701554	44718689
chr10	44792555	44792636	-	MLT1I	LTR	chr10	44786725	44795557
chr10	44799423	44799636	+	L2d2	LINE	chr10	44795662	44800294
chr10	45100514	45100706	-	MLT1J	LTR	chr10	45100126	45101028
chr10	45682292	45682560	+	Bov-A2	SINE	chr10	45681585	45683669
chr10	47443461	47443714	+	Bov-A2	SINE	chr10	47442954	47444434
chr10	50968863	50969286	-	MLT1H2	LTR	chr10	50966111	50970955
chr10	51004828	51004968	+	Bov-A2	SINE	chr10	51002860	51005468
chr10	51244934	51245132	-	Bov-tA2	SINE	chr10	51244542	51245857
chr10	52065263	52065465	-	Bov-tA2	SINE	chr10	52064962	52065464
chr10	52603676	52603946	-	Bov-A2	SINE	chr10	52602794	52604275
chr10	53221557	53221694	-	Bov-tA2	SINE	chr10	53221242	53222147
chr10	53403722	53403994	-	Bov-A2	SINE	chr10	53402983	53404673
chr10	54131350	54131621	+	L1MCa	LINE	chr10	54130682	54132576
chr10	54262349	54262832	+	MLT1F1	LTR	chr10	54261844	54263739
chr10	55121619	55121891	-	Bov-A2	SINE	chr10	55121403	55122386
chr10	57996501	57996779	-	L2c	LINE	chr10	57995078	57997390
chr10	59022126	59023074	+	L1MEj	LINE	chr10	59021270	59023103
chr10	60939554	60939815	+	MER102c	DNA	chr10	60939248	60940599
chr10	61087189	61087449	-	Bov-A2	SINE	chr10	61083900	61088910
chr10	64880893	64881171	-	Bov-A2	SINE	chr10	64880842	64882003
chr10	65126141	65126796	+	Charlie16	DNA	chr10	65125270	65127236
chr10	72323737	72323934	-	Bov-tA2	SINE	chr10	72323182	72324203
chr10	75902012	75902244	+	Bov-A2	SINE	chr10	75901772	75902696
chr10	76280307	76280578	+	Bov-A2	SINE	chr10	76279568	76281651
chr10	78974150	78974424	-	Bov-A2	SINE	chr10	78972628	78975948
chr10	80983641	80983843	+	Bov-tA3	SINE	chr10	80983280	80984273
chr10	80983722	80983868	+	Bov-A2	SINE	chr10	80983280	80984273
chr10	81353328	81353436	-	L2c	LINE	chr10	81351359	81354936
chr10	81420683	81421208	-	MER41_BT	LTR	chr10	81420555	81421295
chr10	81990464	81990598	-	Bov-A2	SINE	chr10	81989714	81991849
chr10	82923824	82924042	+	Bov-tA1	SINE	chr10	82923357	82925880
chr10	82992782	82993073	-	L1ME4b	LINE	chr10	82991816	82993678
chr10	83449719	83450080	+	BtERV3B_LTR	LTR	chr10	83448592	83450669
chr10	84822996	84823073	-	MIR	SINE	chr10	84822327	84823306
chr10	84827653	84827925	+	Bov-A2	SINE	chr10	84826316	84830312
chr10	85493218	85493481	+	Bov-A2	SINE	chr10	85493007	85493985
chr10	88773562	88773763	+	Bov-tA2	SINE	chr10	88772972	88775628
chr10	88773645	88773778	+	Bov-A2	SINE	chr10	88772972	88775628
chr10	91925098	91925221	-	Bov-A2	SINE	chr10	91924207	91925951
chr10	92611519	92611790	-	Bov-A2	SINE	chr10	92611022	92612533
chr10	99069631	99069786	+	Bov-tA1	SINE	chr10	99068822	99072502
chr10	99163188	99163398	+	Bov-tA2	SINE	chr10	99162431	99164011
chr10	102797406	102797741	+	MARE6	LINE	chr10	102797149	102797894
chr11	208668	208933	-	Bov-A2	SINE	chr11	208031	209492
chr11	3627999	3628130	+	L2b	LINE	chr11	3626529	3630346
chr11	5238637	5238806	+	MER112	DNA	chr11	5237314	5240445
chr11	6340144	6340298	+	LTR81B	LTR	chr11	6338991	6341388
chr11	6801505	6801658	-	Bov-A2	SINE	chr11	6801517	6803083
chr11	9775297	9775412	-	MIRb	SINE	chr11	9773554	9776394
chr11	11668405	11668677	+	Bov-A2	SINE	chr11	11668276	11670480
chr11	14900264	14900463	+	Bov-tA3	SINE	chr11	14900419	14900911
chr11	15353873	15354144	+	Bov-A2	SINE	chr11	15352728	15354798
chr11	15527641	15527903	+	Bov-A2	SINE	chr11	15526231	15529657
chr11	15681834	15682051	+	LTR90A	LTR	chr11	15680574	15682811
chr11	15724740	15725063	+	MLT1A	LTR	chr11	15723817	15726160
chr11	19526352	19527194	+	L1MEc	LINE	chr11	19525701	19528260
chr11	20920140	20920410	-	Bov-A2	SINE	chr11	20916831	20924094
chr11	21040472	21040818	-	MLT1L	LTR	chr11	21036699	21044786
chr11	21520340	21520635	-	ERVL-E-int	LTR	chr11	21519916	21521872
chr11	21636778	21636953	-	Bov-A2	SINE	chr11	21635934	21638702
chr11	21719535	21720297	+	L1MC4	LINE	chr11	21717108	21723383
chr11	21850448	21850599	-	MLT2B4	LTR	chr11	21847751	21852712
chr11	22107508	22107680	+	MIR	SINE	chr11	22107094	22110021
chr11	25201815	25202294	+	Arthur1B	DNA	chr11	25201442	25202573
chr11	25387315	25387353	+	SINE2-2_BT	SINE	chr11	25384324	25387920
chr11	25666134	25666349	+	Charlie1	DNA	chr11	25664950	25667160
chr11	25976637	25977363	-	BovB	LINE	chr11	25976679	25977991
chr11	26143691	26143896	-	Bov-tA2	SINE	chr11	26142962	26144679
chr11	27947599	27947868	-	Bov-A2	SINE	chr11	27945742	27948543
chr11	29933651	29933836	-	Bov-tA2	SINE	chr11	29932589	29936334
chr11	36109840	36110138	+	ERV54-EC_LTR	LTR	chr11	36108778	36110928
chr11	36463791	36464062	-	Bov-A2	SINE	chr11	36462973	36465117
chr11	36644848	36645053	+	Bov-tA2	SINE	chr11	36640178	36645950
chr11	37678709	37679350	-	L3	LINE	chr11	37677416	37680471
chr11	43896746	43897164	+	MLT1L	LTR	chr11	43895956	43898018
chr11	44754119	44754391	+	Bov-A2	SINE	chr11	44753987	44755449
chr11	46003711	46003918	+	Bov-tA3	SINE	chr11	46003146	46004662
chr11	47510239	47510987	-	L1ME1	LINE	chr11	47510070	47511375
chr11	48464970	48465171	+	Bov-tA3	SINE	chr11	48464300	48465973
chr11	48465050	48465192	+	Bov-A2	SINE	chr11	48464300	48465973
chr11	48592864	48593069	-	ERVL-E-int	LTR	chr11	48591494	48594144
chr11	48776765	48776961	-	Bov-A2	SINE	chr11	48776319	48777478
chr11	48776916	48776967	-	Bov-tA3	SINE	chr11	48776319	48777478
chr11	53948163	53948499	-	BovB	LINE	chr11	53946509	53949091
chr11	53968324	53968525	+	Bov-tA2	SINE	chr11	53966558	53969937
chr11	58717446	58717576	-	MER5A	DNA	chr11	58716702	58719383
chr11	59076564	59076701	-	Bov-A2	SINE	chr11	59075208	59078798
chr11	59076585	59076708	-	Bov-tA2	SINE	chr11	59075208	59078798
chr11	60518327	60518593	-	Bov-A2	SINE	chr11	60517491	60519425
chr11	60574723	60574978	-	Bov-A2	SINE	chr11	60574393	60575863
chr11	61796652	61796921	-	Bov-A2	SINE	chr11	61796300	61797649
chr11	63626403	63626659	-	Bov-A2	SINE	chr11	63625844	63626807
chr11	66413211	66413404	-	Bov-tA3	SINE	chr11	66411600	66414186
chr11	66433336	66433521	+	L1M6B	LINE	chr11	66430254	66434347
chr11	68178895	68179130	+	Bov-A2	SINE	chr11	68175989	68180548
chr11	68662732	68662792	+	LTR103_Mam	LTR	chr11	68662006	68665330
chr11	70347798	70347968	+	Bov-tA2	SINE	chr11	70346177	70350862
chr11	70435877	70436063	-	MIR3	SINE	chr11	70435227	70436846
chr11	71022929	71023133	-	Bov-tA2	SINE	chr11	71021952	71023463
chr11	71323319	71323446	+	BovB	LINE	chr11	71321543	71324553
chr11	71995969	71996241	+	Bov-A2	SINE	chr11	71995593	71996394
chr11	73670929	73671020	+	Bov-A2	SINE	chr11	73670117	73671677
chr11	75470604	75470763	-	MIR	SINE	chr11	75469316	75471496
chr11	78744039	78744295	-	L2d	LINE	chr11	78742224	78745739
chr11	78755921	78756038	+	Bov-A2	SINE	chr11	78756000	78756528
chr11	85536129	85536397	-	Bov-A2	SINE	chr11	85534215	85537275
chr11	86213853	86214057	+	MIRc	SINE	chr11	86213035	86215624
chr11	86527975	86528247	+	Bov-A2	SINE	chr11	86526833	86530038
chr11	87968955	87969160	-	Bov-tA3	SINE	chr11	87968531	87969401
chr11	88174442	88174714	-	Bov-A2	SINE	chr11	88173918	88175940
chr11	92379256	92379345	+	MIR3	SINE	chr11	92378144	92381522
chr11	92931711	92932127	+	MLT1O	LTR	chr11	92928796	92932890
chr11	93981406	93981477	-	LTR47_BT	LTR	chr11	93981164	93981993
chr11	94327744	94328016	-	Bov-A2	SINE	chr11	94326295	94328896
chr11	94693660	94693836	+	L2b	LINE	chr11	94692652	94695881
chr11	95294398	95294609	+	Bov-tA1	SINE	chr11	95293861	95295710
chr11	95752996	95753198	+	Bov-tA2	SINE	chr11	95752722	95753777
chr11	96189164	96189360	-	Bov-tA3	SINE	chr11	96186028	96190875
chr11	97710866	97711068	+	Bov-tA3	SINE	chr11	97709722	97711859
chr11	98055892	98056124	+	Bov-tA1	SINE	chr11	98053827	98057134
chr11	98316830	98316907	+	L2a	LINE	chr11	98313731	98320733
chr11	99082335	99082603	+	Bov-A2	SINE	chr11	99082229	99084203
chr11	99435107	99435217	+	Bov-A2	SINE	chr11	99434593	99435367
chr11	101000183	101000372	-	Bov-tA2	SINE	chr11	100999644	101001033
chr11	101024696	101024961	+	Bov-A2	SINE	chr11	101023112	101026057
chr11	101032634	101033048	-	L1ME1	LINE	chr11	101031531	101034811
chr11	101095193	101095560	+	Tigger13a	DNA	chr11	101090526	101098115
chr11	101307328	101307794	-	MER41_BT	LTR	chr11	101306635	101308353
chr11	102439557	102439614	-	Bov-tA2	SINE	chr11	102438541	102440211
chr11	103767269	103767338	-	Bov-A2	SINE	chr11	103766668	103768065
chr11	104839118	104839246	+	Bov-A2	SINE	chr11	104838505	104839681
chr11	104868073	104868201	-	BovB	LINE	chr11	104865975	104868203
chr11	106114837	106115109	+	Bov-A2	SINE	chr11	106114293	106115573
chr12	2287635	2287677	-	Bov-A2	SINE	chr12	2284840	2288281
chr12	2600736	2601240	-	L1MC4	LINE	chr12	2600508	2601308
chr12	11184990	11185057	-	MIR	SINE	chr12	11184213	11185951
chr12	11844587	11844694	+	MER117	DNA	chr12	11843079	11847266
chr12	12193861	12194287	-	L1M2	LINE	chr12	12193458	12194765
chr12	12287307	12287384	-	Bov-A2	SINE	chr12	12286594	12288770
chr12	12304236	12304508	-	Bov-A2	SINE	chr12	12303239	12305669
chr12	14520831	14521206	-	L1MB2	LINE	chr12	14519984	14521917
chr12	14590722	14590987	-	Bov-A2	SINE	chr12	14590339	14591223
chr12	14673498	14673766	+	Bov-A2	SINE	chr12	14672259	14675898
chr12	16591398	16591868	-	L1MB3	LINE	chr12	16589644	16592784
chr12	16616711	16616844	+	MIR	SINE	chr12	16615023	16617765
chr12	16739118	16739227	-	Bov-A2	SINE	chr12	16738214	16739662
chr12	16739126	16739258	-	Bov-tA3	SINE	chr12	16738214	16739662
chr12	17824520	17824704	+	Bov-tA2	SINE	chr12	17824218	17825115
chr12	19111970	19112238	-	Bov-A2	SINE	chr12	19111303	19114168
chr12	19167490	19167763	-	Bov-A2	SINE	chr12	19165734	19167664
chr12	19490032	19490298	+	Bov-A2	SINE	chr12	19487698	19491797
chr12	19507040	19507304	-	Bov-A2	SINE	chr12	19506117	19510386
chr12	20896669	20897878	+	L1MB2	LINE	chr12	20897374	20898223
chr12	21859585	21860030	-	HAL1	LINE	chr12	21859550	21860384
chr12	22904105	22904260	-	BovB	LINE	chr12	22902769	22905375
chr12	27646495	27646687	+	Bov-tA2	SINE	chr12	27646045	27647639
chr12	27759605	27759913	-	L2d	LINE	chr12	27759157	27763920
chr12	31439846	31439929	+	MIR3	SINE	chr12	31439391	31440950
chr12	31941224	31941409	-	Bov-tA2	SINE	chr12	31939631	31943760
chr12	32675875	32676146	+	Bov-A2	SINE	chr12	32675011	32676454
chr12	33060633	33060839	-	Bov-tA2	SINE	chr12	33057775	33061763
chr12	34328573	34328842	-	Bov-A2	SINE	chr12	34327955	34329298
chr12	39578626	39578703	-	L2	LINE	chr12	39577995	39579380
chr12	39659387	39659560	-	Bov-tA2	SINE	chr12	39653243	39661171
chr12	48967302	48967457	-	MIRc	SINE	chr12	48966088	48968594
chr12	50738964	50739216	+	Bov-A2	SINE	chr12	50738033	50747699
chr12	50755020	50755211	+	Bov-A2	SINE	chr12	50750743	50757970
chr12	50879052	50879324	-	Bov-A2	SINE	chr12	50878615	50879465
chr12	52783500	52783701	+	Bov-tA2	SINE	chr12	52781179	52784273
chr12	54436094	54437245	-	Tigger1	DNA	chr12	54435772	54437246
chr12	55353257	55353542	-	Bov-A2	SINE	chr12	55351979	55355064
chr12	55907421	55907691	-	L2	LINE	chr12	55906666	55909928
chr12	69607065	69607354	+	L1MB2	LINE	chr12	69606066	69610806
chr12	73082171	73082348	-	Bov-tA2	SINE	chr12	73081106	73083089
chr12	75446086	75446358	+	Bov-A2	SINE	chr12	75445929	75446708
chr12	75947496	75947604	+	BovB	LINE	chr12	75946828	75948359
chr12	76785256	76786244	-	BovB	LINE	chr12	76785006	76786611
chr12	77229335	77229492	-	LTR65	LTR	chr12	77227855	77231562
chr13	2173564	2173768	-	Bov-tA3	SINE	chr13	2171580	2174884
chr13	3838730	3838847	-	Bov-A2	SINE	chr13	3838121	3839547
chr13	10724085	10724196	-	MIR	SINE	chr13	10721109	10725288
chr13	11549636	11549836	+	Bov-tA2	SINE	chr13	11547063	11550592
chr13	11800539	11800904	-	MER74A	LTR	chr13	11799171	11801584
chr13	11842843	11843060	-	MIRb	SINE	chr13	11841696	11844060
chr13	16091908	16092170	+	Bov-A2	SINE	chr13	16091448	16092551
chr13	17555943	17556141	+	Bov-tA3	SINE	chr13	17554502	17556907
chr13	21114724	21114844	+	MIRc	SINE	chr13	21113836	21115174
chr13	21460868	21461910	-	HAL1	LINE	chr13	21459720	21462791
chr13	23037085	23037265	+	L1M5	LINE	chr13	23036005	23037579
chr13	29719483	29720212	+	L1MCa	LINE	chr13	29718136	29721884
chr13	33333453	33333858	+	L2b	LINE	chr13	33331798	33336813
chr13	36124047	36124305	+	Bov-A2	SINE	chr13	36123294	36125372
chr13	36129905	36130177	+	Bov-A2	SINE	chr13	36128932	36134683
chr13	38234322	38234575	-	Bov-A2	SINE	chr13	38233828	38235426
chr13	44676779	44677043	+	Bov-A2	SINE	chr13	44676282	44677633
chr13	46189787	46190099	-	CHR-2A	SINE	chr13	46189974	46190333
chr13	46309211	46309489	-	Bov-A2	SINE	chr13	46308723	46310702
chr13	46461715	46461988	-	Bov-A2	SINE	chr13	46461539	46462576
chr13	46849031	46849148	-	Bov-A2	SINE	chr13	46848657	46850085
chr13	48252427	48252544	+	MamGypLTR1d	LTR	chr13	48249860	48254738
chr13	52197938	52198132	-	Bov-tA2	SINE	chr13	52190878	52200980
chr13	52370778	52370976	+	Bov-tA2	SINE	chr13	52369663	52371428
chr13	55157267	55157539	+	Bov-A2	SINE	chr13	55156539	55157836
chr13	56598156	56598471	+	MER57LA	LTR	chr13	56597605	56599202
chr13	58624019	58624148	+	Bov-A2	SINE	chr13	58623501	58625099
chr13	60524062	60524260	+	Bov-tA2	SINE	chr13	60523376	60524951
chr13	60633306	60633577	-	Bov-A2	SINE	chr13	60633145	60634058
chr13	62115534	62115637	-	Bov-A2	SINE	chr13	62114851	62116715
chr13	63256757	63257027	-	Bov-A2	SINE	chr13	63255037	63257631
chr13	63930063	63930158	+	L2c	LINE	chr13	63928634	63936031
chr13	64409099	64409276	-	MIRc	SINE	chr13	64408451	64410678
chr13	64478180	64478456	-	Bov-A2	SINE	chr13	64477486	64478622
chr13	64646498	64646766	-	Bov-A2	SINE	chr13	64646196	64646961
chr13	65879389	65879583	+	Bov-tA3	SINE	chr13	65879135	65879957
chr13	65879462	65879598	+	Bov-A2	SINE	chr13	65879135	65879957
chr13	66946877	66947078	+	Bov-tA2	SINE	chr13	66946628	66948434
chr13	66946956	66947098	+	Bov-A2	SINE	chr13	66946628	66948434
chr13	67018574	67018767	+	MIRb	SINE	chr13	67017511	67026259
chr13	67928661	67928868	+	Bov-tA2	SINE	chr13	67927721	67931815
chr13	68459214	68459464	+	LTR16D1	LTR	chr13	68458709	68459947
chr13	68801386	68801714	-	BovB	LINE	chr13	68798759	68803877
chr13	69708755	69709298	-	Bov-A2	SINE	chr13	69706413	69711178
chr13	77749425	77749786	-	MER41_BT	LTR	chr13	77748852	77752307
chr13	78135241	78135394	+	L2a	LINE	chr13	78134282	78138656
chr13	78366353	78366458	+	L2a	LINE	chr13	78366015	78366761
chr14	2949039	2949158	+	Bov-A2	SINE	chr14	2946246	2950743
chr14	7799786	7799919	+	L2c	LINE	chr14	7798761	7800848
chr14	8049194	8049312	+	LTR33A_	LTR	chr14	8048143	8049704
chr14	9184894	9185150	+	Bov-A2	SINE	chr14	9184050	9188150
chr14	10659012	10659150	+	MIR3	SINE	chr14	10658047	10660036
chr14	10701923	10702363	-	HERVL40-int	LTR	chr14	10700794	10707363
chr14	12767364	12767486	-	L2d2	LINE	chr14	12764297	12769251
chr14	16460112	16461032	-	L1MB3	LINE	chr14	16459967	16461039
chr14	16605446	16605770	+	L2b	LINE	chr14	16604614	16607279
chr14	16855080	16855487	+	MLT1H	LTR	chr14	16854804	16856759
chr14	16919444	16919642	+	MIRc	SINE	chr14	16918352	16920490
chr14	19147219	19147338	-	Bov-A2	SINE	chr14	19146765	19148200
chr14	19429871	19430143	-	Bov-A2	SINE	chr14	19429192	19430734
chr14	24353033	24353305	-	Bov-A2	SINE	chr14	24352318	24353909
chr14	26191279	26191551	+	Bov-A2	SINE	chr14	26190662	26195564
chr14	26380269	26380537	-	Bov-A2	SINE	chr14	26380029	26380614
chr14	30095355	30095624	+	Bov-A2	SINE	chr14	30094723	30095799
chr14	30121173	30122061	+	L1MA9	LINE	chr14	30121261	30122007
chr14	30890085	30890358	+	L2c	LINE	chr14	30887586	30891328
chr14	30907242	30907406	-	Bov-tA2	SINE	chr14	30905594	30909166
chr14	31260221	31260423	-	L1MCc	LINE	chr14	31259601	31261305
chr14	33604939	33605156	+	Bov-tA2	SINE	chr14	33603117	33607046
chr14	36430105	36430240	+	Bov-A2	SINE	chr14	36429584	36432223
chr14	36472352	36472464	+	Bov-tA2	SINE	chr14	36471642	36472579
chr14	38781036	38781314	-	Bov-A2	SINE	chr14	38776744	38782178
chr14	39767878	39768130	-	MLT1A	LTR	chr14	39767572	39768380
chr14	41656437	41656646	-	Bov-tA2	SINE	chr14	41656216	41657093
chr14	41908701	41908885	+	Bov-tA3	SINE	chr14	41907576	41909397
chr14	41978531	41979902	+	L1MB7	LINE	chr14	41978805	41980211
chr14	41987283	41988592	+	BovB	LINE	chr14	41987169	41989530
chr14	43678517	43678561	-	Bov-A2	SINE	chr14	43675659	43679394
chr14	44225015	44225516	+	MLT1H	LTR	chr14	44223856	44226057
chr14	45384039	45384367	-	L1MB5	LINE	chr14	45383897	45385818
chr14	45951519	45952214	-	Helitron1Nb_Mam	RC	chr14	45950906	45953183
chr14	45998829	45999016	+	Bov-tA2	SINE	chr14	45998382	45999494
chr14	46355804	46356075	-	Bov-A2	SINE	chr14	46354911	46357267
chr14	54802569	54802840	-	Bov-A2	SINE	chr14	54801497	54804316
chr14	57457204	57457424	-	MLT1K	LTR	chr14	57457271	57457901
chr14	60284445	60284867	-	MLT2D	LTR	chr14	60284381	60285104
chr14	60481623	60481824	+	Bov-tA3	SINE	chr14	60480985	60482181
chr14	60877562	60877749	+	Bov-tA2	SINE	chr14	60877471	60878282
chr14	60975095	60975311	+	MamSINE1	SINE	chr14	60972518	60975772
chr14	61236763	61236868	-	MER3	DNA	chr14	61234630	61238008
chr14	61457859	61458061	-	Bov-tA2	SINE	chr14	61456736	61461680
chr14	61505544	61505763	-	Bov-tA2	SINE	chr14	61503781	61509658
chr14	61765341	61765582	-	MLT1H	LTR	chr14	61765027	61765832
chr14	63533652	63534628	-	L1MC1	LINE	chr14	63533449	63535250
chr14	63884586	63885173	-	MER41_BT	LTR	chr14	63884356	63885472
chr14	64525072	64525281	+	Bov-tA2	SINE	chr14	64524983	64526662
chr14	65198197	65198405	+	Bov-tA2	SINE	chr14	65196839	65198514
chr14	65234853	65234989	-	Bov-A2	SINE	chr14	65234154	65235605
chr14	65533900	65534078	-	Bov-tA2	SINE	chr14	65533008	65534671
chr14	66191617	66191688	+	Bov-tA2	SINE	chr14	66191109	66192516
chr14	66221002	66221247	+	MLT1L	LTR	chr14	66220261	66222288
chr14	68688931	68689062	-	MIR1_Amn	SINE	chr14	68687826	68689905
chr14	70499626	70499894	+	Bov-A2	SINE	chr14	70499293	70500001
chr14	72349403	72349554	+	MIRc	SINE	chr14	72348097	72350956
chr14	75222820	75223007	+	Bov-tA3	SINE	chr14	75221901	75223932
chr14	77397988	77398256	+	Bov-A2	SINE	chr14	77397417	77398715
chr14	81850930	81851202	-	Bov-A2	SINE	chr14	81849247	81852404
chr14	81934447	81934641	+	Bov-tA2	SINE	chr14	81933489	81935108
chr15	5333721	5333973	+	Bov-A2	SINE	chr15	5333763	5334891
chr15	5954510	5954983	-	MamRep1527	LTR	chr15	5954075	5955210
chr15	6409195	6409465	-	Bov-A2	SINE	chr15	6408155	6412778
chr15	6597105	6597372	+	Bov-A2	SINE	chr15	6596831	6598594
chr15	7890162	7890321	-	Bov-A2	SINE	chr15	7888787	7891338
chr15	8214955	8215217	-	Bov-A2	SINE	chr15	8209980	8217017
chr15	17417623	17417765	-	Bov-tA2	SINE	chr15	17416546	17420261
chr15	17648609	17648823	-	Bov-tA2	SINE	chr15	17647953	17648863
chr15	20339047	20339529	-	BovB	LINE	chr15	20339046	20341055
chr15	20471802	20472446	+	BovB	LINE	chr15	20470904	20472584
chr15	20588355	20588872	-	L1-3_BT	LINE	chr15	20587532	20589130
chr15	22326630	22326831	-	Bov-tA2	SINE	chr15	22325618	22326972
chr15	29235630	29235839	+	Bov-tA3	SINE	chr15	29235264	29236530
chr15	29235718	29235854	+	Bov-A2	SINE	chr15	29235264	29236530
chr15	29419973	29420541	+	HAL1	LINE	chr15	29419616	29420358
chr15	29761247	29761673	-	ALTR39_BT	LTR	chr15	29760417	29762670
chr15	30958138	30958314	+	BovB	LINE	chr15	30956918	30959401
chr15	31556127	31556332	+	Bov-tA2	SINE	chr15	31555183	31557230
chr15	31844942	31845189	-	Bov-A2	SINE	chr15	31843873	31846180
chr15	34520243	34520414	+	MIR3	SINE	chr15	34519189	34520882
chr15	35446614	35446891	-	L2a	LINE	chr15	35445711	35448787
chr15	35622790	35622895	-	MLT1K	LTR	chr15	35621638	35623061
chr15	37420219	37420494	+	Bov-A2	SINE	chr15	37419825	37421494
chr15	38074147	38074415	-	Bov-A2	SINE	chr15	38072544	38084719
chr15	38266866	38267044	+	Bov-tA2	SINE	chr15	38266282	38268117
chr15	38290741	38291771	+	L1MB8	LINE	chr15	38290806	38294727
chr15	39971461	39973522	-	Tigger1	DNA	chr15	39971707	39979868
chr15	39983675	39983880	-	Bov-tA2	SINE	chr15	39982056	39984398
chr15	40473523	40473713	-	Bov-tA3	SINE	chr15	40472466	40474365
chr15	42427790	42429090	-	BovB	LINE	chr15	42427465	42428636
chr15	42764579	42764772	-	Bov-tA2	SINE	chr15	42763994	42765546
chr15	42786467	42786787	-	MER102a	DNA	chr15	42784140	42787993
chr15	42853340	42853553	-	Bov-tA3	SINE	chr15	42852588	42854177
chr15	43228537	43228796	-	Bov-A2	SINE	chr15	43223824	43232065
chr15	43329787	43329983	+	L1MB3	LINE	chr15	43329068	43330086
chr15	51600269	51601148	-	Tigger1	DNA	chr15	51600168	51602289
chr15	51625907	51626823	+	L2b	LINE	chr15	51623898	51627088
chr15	51921019	51921178	-	L3	LINE	chr15	51920319	51922093
chr15	52472794	52473038	-	Bov-A2	SINE	chr15	52471490	52474410
chr15	52671858	52672193	+	Bov-A2	SINE	chr15	52669908	52673306
chr15	52743600	52743867	-	Bov-A2	SINE	chr15	52743194	52743794
chr15	52778602	52778804	+	MIRb	SINE	chr15	52778006	52779525
chr15	52823059	52823330	+	Bov-A2	SINE	chr15	52822283	52825355
chr15	56463781	56464013	-	Bov-A2	SINE	chr15	56463584	56464763
chr15	56495949	56496081	-	MIRb	SINE	chr15	56493978	56496754
chr15	65591574	65591965	+	ERV3-16A3_LTR	LTR	chr15	65588882	65593734
chr15	73477386	73477479	+	Bov-A2	SINE	chr15	73476687	73477447
chr15	73870762	73870958	-	Bov-tA2	SINE	chr15	73870501	73871382
chr15	73880465	73880728	-	Bov-A2	SINE	chr15	73879868	73881312
chr15	74250718	74251030	+	UCON44	DNA	chr15	74250219	74251649
chr15	76321158	76321427	-	Bov-A2	SINE	chr15	76320191	76323890
chr15	76540563	76540748	-	Bov-A2	SINE	chr15	76539965	76541171
chr15	76756953	76757223	+	Bov-A2	SINE	chr15	76755546	76758447
chr15	80828823	80829010	-	Bov-tA2	SINE	chr15	80828417	80829305
chr15	82295164	82295256	-	Bov-tA2	SINE	chr15	82294624	82295231
chr16	1526464	1526541	-	Bov-tA1	SINE	chr16	1525013	1528025
chr16	1898822	1899022	-	Bov-tA2	SINE	chr16	1892481	1899710
chr16	2263356	2263592	-	L2	LINE	chr16	2262080	2266891
chr16	3472303	3472594	+	CHR-2A	SINE	chr16	3471177	3473380
chr16	3482266	3482523	+	Bov-A2	SINE	chr16	3481587	3482973
chr16	4761541	4762093	-	BovB	LINE	chr16	4760881	4763860
chr16	15953784	15954076	-	CHR-2A	SINE	chr16	15953813	15955067
chr16	15982970	15983059	+	MER21C_BT	LTR	chr16	15982318	15983949
chr16	20233977	20234691	+	L1-2_BT	LINE	chr16	20233747	20236773
chr16	23548746	23548922	-	MLT1H1	LTR	chr16	23548358	23549657
chr16	24312664	24313046	+	MLT2B4	LTR	chr16	24311284	24314822
chr16	27133152	27133422	-	Bov-A2	SINE	chr16	27131857	27133689
chr16	27245217	27245403	-	Bov-tA2	SINE	chr16	27243145	27248456
chr16	27339423	27339595	-	Bov-tA2	SINE	chr16	27334401	27340305
chr16	28990659	28990822	-	L2b	LINE	chr16	28990258	28991144
chr16	30629174	30629653	-	LTR41	LTR	chr16	30629277	30630071
chr16	32618249	32618693	+	L2d2	LINE	chr16	32616195	32619709
chr16	33901640	33901841	+	Bov-tA2	SINE	chr16	33899508	33904768
chr16	34906406	34906522	-	Bov-tA2	SINE	chr16	34905763	34907026
chr16	34963640	34963904	-	Bov-A2	SINE	chr16	34963360	34964415
chr16	35296729	35296900	+	Bov-tA2	SINE	chr16	35295300	35297493
chr16	36397593	36398063	+	BTLTR1E2	LTR	chr16	36396464	36400480
chr16	36798718	36799034	+	MER41_BT	LTR	chr16	36798163	36799805
chr16	36806900	36807084	+	MLT1J	LTR	chr16	36805900	36808469
chr16	37016752	37017898	+	L2a	LINE	chr16	37016501	37018591
chr16	38434192	38434449	-	Bov-A2	SINE	chr16	38433681	38435250
chr16	41440013	41440334	+	L1MB7	LINE	chr16	41439625	41441382
chr16	41842342	41842876	+	MER21C	LTR	chr16	41842498	41843051
chr16	43155483	43155649	+	MLT1G3	LTR	chr16	43152816	43159436
chr16	44111967	44112238	-	Bov-A2	SINE	chr16	44110945	44113564
chr16	45392836	45392896	-	Bov-A2	SINE	chr16	45391527	45393483
chr16	46520012	46520354	-	MER58B	DNA	chr16	46519616	46523255
chr16	46723673	46723812	+	Bov-tA2	SINE	chr16	46723176	46724347
chr16	49411922	49412192	-	Bov-A2	SINE	chr16	49410752	49413266
chr16	51870726	51870939	+	L2a	LINE	chr16	51869258	51873513
chr16	51892702	51892932	+	Bov-A2	SINE	chr16	51892016	51894159
chr16	52320797	52321976	-	Mariner1_BT	DNA	chr16	52320297	52321729
chr16	57746567	57746839	+	Bov-A2	SINE	chr16	57746173	57747420
chr16	59812837	59813199	+	L2a	LINE	chr16	59812313	59813970
chr16	60020760	60020936	+	MIRb	SINE	chr16	60018929	60022316
chr16	60029109	60029305	-	MLT1O	LTR	chr16	60027961	60031081
chr16	60410017	60410224	+	Bov-tA3	SINE	chr16	60409729	60410977
chr16	63310509	63311763	+	L1_BT	LINE	chr16	63311185	63312329
chr16	63705746	63705951	-	L1_Art	LINE	chr16	63705408	63706722
chr16	63709551	63709810	-	L2c	LINE	chr16	63708002	63710312
chr16	64258731	64258853	-	Bov-A2	SINE	chr16	64258114	64259242
chr16	64258746	64258875	-	Bov-tA3	SINE	chr16	64258114	64259242
chr16	64318188	64318405	+	MER20	DNA	chr16	64317878	64319318
chr16	64396695	64397077	+	L2b	LINE	chr16	64395985	64397196
chr16	64552854	64553115	+	Bov-A2	SINE	chr16	64548890	64553497
chr16	64674227	64674498	+	Bov-A2	SINE	chr16	64674033	64674885
chr16	65866470	65866733	+	Bov-A2	SINE	chr16	65865952	65868921
chr16	65903408	65903657	-	Bov-A2	SINE	chr16	65898473	65905894
chr16	65928263	65928530	-	Bov-A2	SINE	chr16	65927351	65931462
chr16	66095856	66096128	+	Bov-A2	SINE	chr16	66090113	66097639
chr16	70511800	70512053	+	L1_Art	LINE	chr16	70509411	70513166
chr16	70514130	70514397	-	Bov-A2	SINE	chr16	70513642	70515298
chr16	71077022	71078298	+	Mariner1_BT	DNA	chr16	71075659	71079704
chr16	71362248	71362859	+	L1MC4	LINE	chr16	71361465	71364974
chr16	72293584	72293739	+	MIRb	SINE	chr16	72292390	72294843
chr16	73638132	73638330	+	Bov-tA3	SINE	chr16	73637916	73638991
chr16	73638209	73638349	+	Bov-A2	SINE	chr16	73637916	73638991
chr16	76130943	76131215	+	Bov-A2	SINE	chr16	76129810	76131391
chr16	76589479	76589749	-	Bov-A2	SINE	chr16	76588857	76589872
chr16	79838853	79838975	-	BovB	LINE	chr16	79838161	79839531
chr16	79886584	79886855	-	Bov-A2	SINE	chr16	79886360	79887746
chr16	80000075	80000182	+	Bov-A2	SINE	chr16	79999386	80000717
chr17	210715	210917	-	Bov-tA3	SINE	chr17	210300	211390
chr17	3997930	3998202	+	Bov-A2	SINE	chr17	3997778	3998805
chr17	4446570	4446714	-	MIR	SINE	chr17	4445802	4447399
chr17	4707566	4707618	-	L1MB3	LINE	chr17	4706523	4709721
chr17	6252091	6252225	-	Bov-A2	SINE	chr17	6250913	6253340
chr17	6252106	6252307	-	Bov-tA2	SINE	chr17	6250913	6253340
chr17	6965873	6966050	+	Bov-A2	SINE	chr17	6965451	6966598
chr17	7639176	7639629	+	MER41_BT	LTR	chr17	7638892	7639950
chr17	7661072	7662364	+	BovB	LINE	chr17	7661590	7662898
chr17	7712182	7712451	+	Bov-A2	SINE	chr17	7711469	7713627
chr17	7768466	7768655	+	MLT1K	LTR	chr17	7765673	7771012
chr17	10363014	10363164	-	Tigger14a	DNA	chr17	10362136	10364195
chr17	12455072	12455143	+	Bov-A2	SINE	chr17	12454436	12455551
chr17	12839918	12840184	-	Bov-A2	SINE	chr17	12839191	12842653
chr17	12911732	12911839	-	Bov-A2	SINE	chr17	12911063	12912711
chr17	13046547	13047007	-	LTR33	LTR	chr17	13045404	13047331
chr17	13193761	13194261	-	L1MCa	LINE	chr17	13192698	13194962
chr17	14448756	14448953	+	Bov-tA3	SINE	chr17	14448539	14450822
chr17	14485892	14485955	-	Bov-A2	SINE	chr17	14485685	14486393
chr17	14557976	14559444	+	BovB	LINE	chr17	14557035	14558155
chr17	15834025	15834519	-	L2	LINE	chr17	15833425	15834711
chr17	16791741	16792203	-	LTR16C	LTR	chr17	16790319	16793035
chr17	18481054	18481326	-	Bov-A2	SINE	chr17	18478401	18481871
chr17	24890809	24891292	+	LTR85b	LTR	chr17	24890709	24891530
chr17	27622407	27622667	-	Bov-A2	SINE	chr17	27621368	27622852
chr17	29008546	29008872	-	EUTREP7	LTR	chr17	29007954	29009553
chr17	29963310	29963579	-	Bov-A2	SINE	chr17	29963230	29965129
chr17	30097307	30097678	+	MLT1J	LTR	chr17	30096340	30099610
chr17	39758904	39759164	-	Bov-A2	SINE	chr17	39756214	39766014
chr17	40185570	40185775	-	Bov-tA2	SINE	chr17	40185127	40185931
chr17	40791924	40792113	+	LTR78	LTR	chr17	40790058	40792998
chr17	46315816	46316006	-	Bov-tA2	SINE	chr17	46315090	46316535
chr17	51253201	51253376	+	Bov-tA3	SINE	chr17	51252784	51254038
chr17	52068936	52069140	-	Bov-tA3	SINE	chr17	52068680	52069823
chr17	52645160	52645389	-	L2	LINE	chr17	52636716	52650465
chr17	52765643	52766644	-	BovB	LINE	chr17	52764858	52766349
chr17	53263054	53263679	-	L1MB8	LINE	chr17	53262772	53264580
chr17	53297669	53297940	-	Bov-A2	SINE	chr17	53297193	53298936
chr17	58676121	58677408	+	BovB	LINE	chr17	58675861	58681353
chr17	61306008	61306151	-	L1ME3G	LINE	chr17	61305541	61306541
chr17	63072583	63072650	+	Bov-tA2	SINE	chr17	63070927	63075643
chr17	63214100	63214340	-	L2a	LINE	chr17	63213213	63215386
chr17	63397270	63397455	-	Bov-tA2	SINE	chr17	63397030	63397538
chr17	63690388	63690503	+	MIR	SINE	chr17	63689699	63690974
chr17	65272275	65272387	+	MIRc	SINE	chr17	65267981	65272441
chr17	70062996	70063433	+	L2c	LINE	chr17	70061670	70063578
chr17	70422276	70422341	-	MIR	SINE	chr17	70422305	70422959
chr18	2335027	2335236	-	Bov-tA3	SINE	chr18	2334780	2335664
chr18	2684312	2684503	-	Bov-tA2	SINE	chr18	2683969	2685604
chr18	5432872	5433294	+	BovB	LINE	chr18	5431504	5434432
chr18	6076443	6076618	-	LTR88b	LTR	chr18	6075873	6077038
chr18	7667250	7667447	+	MER20	DNA	chr18	7666381	7667678
chr18	11272010	11272280	+	Bov-A2	SINE	chr18	11271232	11273905
chr18	12567764	12568030	-	Bov-A2	SINE	chr18	12566566	12569428
chr18	14381434	14381674	+	CHR-2A	SINE	chr18	14379610	14385463
chr18	15687784	15689099	+	L2a	LINE	chr18	15686621	15689969
chr18	15716504	15716608	+	MER5A	DNA	chr18	15714361	15717169
chr18	16108224	16108376	-	MER91A	DNA	chr18	16107015	16114535
chr18	16682671	16682943	+	Bov-A2	SINE	chr18	16681712	16683170
chr18	16943014	16943157	-	Bov-A2	SINE	chr18	16942514	16943582
chr18	16943036	16943230	-	Bov-tA3	SINE	chr18	16942514	16943582
chr18	16995241	16995668	+	BovB	LINE	chr18	16995232	16996342
chr18	20048902	20049173	+	MLT1J2	LTR	chr18	20048424	20050412
chr18	20184125	20184994	-	LTR37-int	LTR	chr18	20183378	20185971
chr18	25211095	25211367	+	Bov-A2	SINE	chr18	25210421	25212328
chr18	25511820	25512000	+	L2c	LINE	chr18	25511111	25512365
chr18	25630553	25630813	-	Bov-A2	SINE	chr18	25630015	25631124
chr18	26464205	26464485	-	Bov-A2	SINE	chr18	26464129	26464834
chr18	33989228	33989711	+	MER41_BT	LTR	chr18	33989097	33990036
chr18	34530756	34530943	+	Bov-tA2	SINE	chr18	34530695	34531645
chr18	35138639	35138735	+	L2b	LINE	chr18	35137908	35138945
chr18	35710188	35710226	+	Bov-A2	SINE	chr18	35709694	35710461
chr18	36229023	36229295	-	Bov-A2	SINE	chr18	36226205	36230264
chr18	36231383	36232521	+	BovB	LINE	chr18	36231664	36233006
chr18	36369604	36369892	+	Bov-A2	SINE	chr18	36369200	36370030
chr18	36376261	36376532	-	Bov-A2	SINE	chr18	36375491	36377025
chr18	36469315	36469428	+	MER102b	DNA	chr18	36468709	36470671
chr18	39141414	39141612	+	L2c	LINE	chr18	39140325	39142966
chr18	39742339	39742857	+	MLT1H	LTR	chr18	39740924	39744203
chr18	40256823	40257194	+	MLT1I	LTR	chr18	40255851	40257871
chr18	40586051	40586235	+	Bov-tA2	SINE	chr18	40585860	40586962
chr18	42848282	42848492	-	MIR	SINE	chr18	42841884	42849122
chr18	43885124	43885318	-	Bov-tA2	SINE	chr18	43883532	43885964
chr18	44617935	44618052	-	Bov-A2	SINE	chr18	44616339	44619151
chr18	48016527	48016587	-	Bov-tA2	SINE	chr18	48015670	48016799
chr18	48323024	48323108	-	Eutr2	DNA	chr18	48322106	48325003
chr18	48323030	48323102	+	Eutr2	DNA	chr18	48322106	48325003
chr18	48605197	48605259	-	MIR3	SINE	chr18	48604286	48605941
chr18	49134528	49134627	+	MamSINE1	SINE	chr18	49134042	49137579
chr18	49201724	49202033	-	LTR11B_BT	LTR	chr18	49200685	49203335
chr18	49214612	49215135	+	MLT1H-int	LTR	chr18	49214139	49215522
chr18	49682920	49683192	-	Bov-A2	SINE	chr18	49682510	49683257
chr18	50780001	50780404	-	Bov-A2	SINE	chr18	50779744	50781445
chr18	52671269	52671489	+	Bov-A2	SINE	chr18	52670509	52672148
chr18	52708707	52708819	+	SINE2-2_BT	SINE	chr18	52706950	52709866
chr18	53205776	53206106	+	MER58B	DNA	chr18	53205003	53206620
chr18	56388260	56388598	-	MLT1A	LTR	chr18	56387871	56389217
chr18	56555082	56555526	+	L1MB8	LINE	chr18	56553637	56556698
chr18	58643625	58643784	+	BovB	LINE	chr18	58641753	58644664
chr18	59540464	59541110	+	L1M3	LINE	chr18	59540653	59541918
chr18	61975218	61975269	-	BovB	LINE	chr18	61973943	61977659
chr18	62005921	62006155	-	L1ME3Cz	LINE	chr18	62004885	62006975
chr19	7713348	7713616	+	Bov-A2	SINE	chr19	7712913	7714998
chr19	7872520	7872912	+	ERV54-EC_LTR	LTR	chr19	7871214	7872816
chr19	9971766	9971841	-	ALTR2B1_BT	LTR	chr19	9970733	9972887
chr19	9998084	9998277	-	Bov-tA3	SINE	chr19	9996611	9999495
chr19	10382656	10382838	+	Bov-tA2	SINE	chr19	10381619	10383813
chr19	10407409	10407577	+	Bov-tA2	SINE	chr19	10406402	10409380
chr19	10612887	10612954	-	Bov-A2	SINE	chr19	10610138	10613860
chr19	12395764	12396555	+	L1M4	LINE	chr19	12395419	12396874
chr19	12479347	12479777	-	MLT1L	LTR	chr19	12478264	12480489
chr19	12638306	12638682	-	HAL1	LINE	chr19	12637691	12638916
chr19	12707993	12708260	+	Bov-A2	SINE	chr19	12707294	12709146
chr19	13362979	13363249	+	Bov-A2	SINE	chr19	13362622	13363510
chr19	13386224	13386483	-	Bov-A2	SINE	chr19	13385759	13387187
chr19	13686914	13687117	-	Bov-tA2	SINE	chr19	13686534	13687316
chr19	13878127	13878223	+	L1MD2	LINE	chr19	13877342	13880307
chr19	14908694	14908872	-	Bov-tA2	SINE	chr19	14905968	14909937
chr19	17407538	17407612	+	Bov-A2	SINE	chr19	17397614	17409066
chr19	17407551	17407616	+	Bov-tA1	SINE	chr19	17397614	17409066
chr19	17438848	17439108	+	Bov-A2	SINE	chr19	17437849	17439265
chr19	17524928	17525043	-	Bov-A2	SINE	chr19	17523905	17526100
chr19	18141221	18141448	-	MER21B	LTR	chr19	18137849	18142120
chr19	18907223	18907495	+	Bov-A2	SINE	chr19	18906911	18907951
chr19	18956880	18957240	+	MLT1M	LTR	chr19	18956250	18957861
chr19	21248424	21248521	+	Bov-A2	SINE	chr19	21248123	21249311
chr19	21956045	21956360	-	CHR-2B	SINE	chr19	21950406	21958703
chr19	22542327	22542460	+	Bov-A2	SINE	chr19	22541130	22544090
chr19	22770424	22771050	+	L2b	LINE	chr19	22770329	22772652
chr19	22922002	22922841	-	L1ME3G	LINE	chr19	22920286	22924008
chr19	23272643	23272915	+	Bov-A2	SINE	chr19	23272504	23273690
chr19	23292508	23292657	-	L1MC1	LINE	chr19	23291661	23294130
chr19	23767824	23768069	-	LTR32_BT	LTR	chr19	23764245	23769244
chr19	28260822	28261013	-	L2b	LINE	chr19	28260831	28261591
chr19	29692333	29692427	+	Bov-A2	SINE	chr19	29691700	29693367
chr19	33615013	33615184	-	L1MEj	LINE	chr19	33614620	33615722
chr19	34093711	34093847	+	Bov-A2	SINE	chr19	34092113	34094340
chr19	35706907	35707110	-	Bov-tA3	SINE	chr19	35705531	35707964
chr19	35933026	35933232	+	L2b	LINE	chr19	35931486	35933520
chr19	36268174	36268379	-	Bov-tA2	SINE	chr19	36267728	36269380
chr19	36723639	36723859	+	L1MC4	LINE	chr19	36722937	36724098
chr19	40630577	40630809	-	Bov-A2	SINE	chr19	40630062	40631728
chr19	42502490	42502675	+	MLT1O	LTR	chr19	42501448	42503684
chr19	44148091	44148283	+	Bov-tA2	SINE	chr19	44147419	44149519
chr19	46112032	46112256	+	Bov-A2	SINE	chr19	46110776	46113994
chr19	46963615	46963849	+	Bov-A2	SINE	chr19	46962934	46964469
chr19	47096871	47097076	-	Charlie7	DNA	chr19	47093712	47097596
chr19	47605109	47605376	+	L1M5	LINE	chr19	47604567	47605968
chr19	48839239	48839427	+	L2c	LINE	chr19	48836518	48842027
chr19	48941897	48942041	+	AmnSINE1	SINE	chr19	48939940	48948012
chr19	49091965	49092150	+	Bov-tA2	SINE	chr19	49091727	49092423
chr19	50651944	50652168	+	Bov-A2	SINE	chr19	50651563	50653363
chr19	51193147	51193389	-	UCON22	Unknown	chr19	51193122	51193855
chr19	51740245	51740362	+	Bov-A2	SINE	chr19	51739511	51741125
chr19	51912157	51912424	+	Bov-A2	SINE	chr19	51911666	51912700
chr19	53672417	53672736	+	CHR-2B	SINE	chr19	53671556	53672980
chr19	56309710	56309976	+	Bov-A2	SINE	chr19	56309387	56310225
chr19	61223307	61223507	+	Bov-tA2	SINE	chr19	61222933	61224726
chr19	61978024	61978157	+	Bov-A2	SINE	chr19	61977897	61979546
chr19	62905892	62906164	+	Bov-A2	SINE	chr19	62905369	62906729
chr2	4176388	4176575	+	Bov-A2	SINE	chr2	4176236	4177241
chr2	5169222	5169492	+	Bov-A2	SINE	chr2	5168602	5169951
chr2	7634731	7634925	-	Bov-A2	SINE	chr2	7633798	7635263
chr2	9783579	9783710	-	Bov-A2	SINE	chr2	9783064	9783875
chr2	9783593	9783797	-	Bov-tA3	SINE	chr2	9783064	9783875
chr2	13444588	13444860	+	Bov-A2	SINE	chr2	13444048	13445520
chr2	13831360	13831544	+	Bov-tA2	SINE	chr2	13830757	13832500
chr2	16205626	16205894	-	Bov-A2	SINE	chr2	16205170	16206342
chr2	17644425	17644619	-	Bov-tA2	SINE	chr2	17642608	17645235
chr2	18501721	18502065	-	L2a	LINE	chr2	18499371	18503030
chr2	23515927	23516099	-	UCON25	Unknown	chr2	23515338	23517451
chr2	24279814	24280086	-	Bov-A2	SINE	chr2	24279618	24280479
chr2	24515790	24516045	+	Bov-A2	SINE	chr2	24513871	24516486
chr2	24648879	24649203	-	Bov-A2	SINE	chr2	24647231	24651722
chr2	24894816	24895288	-	MLT1G1	LTR	chr2	24892567	24896125
chr2	27559484	27559685	+	Bov-tA2	SINE	chr2	27558995	27559741
chr2	31478880	31479099	+	Bov-tA2	SINE	chr2	31478354	31479973
chr2	33818067	33818339	-	Bov-A2	SINE	chr2	33816467	33819677
chr2	36001566	36001686	+	MIRc	SINE	chr2	36000485	36002536
chr2	36013064	36013251	+	MIRc	SINE	chr2	36010878	36014828
chr2	36219526	36219781	+	Bov-A2	SINE	chr2	36218631	36220989
chr2	36771042	36771314	-	Bov-A2	SINE	chr2	36769283	36772272
chr2	37165509	37165713	-	Bov-tA3	SINE	chr2	37164819	37169150
chr2	45252724	45252872	-	MIRc	SINE	chr2	45252206	45253683
chr2	47629125	47629360	+	LTR53	LTR	chr2	47628371	47630426
chr2	48886316	48886547	+	Bov-A2	SINE	chr2	48885595	48887368
chr2	52311705	52311972	-	AmnSINE1	SINE	chr2	52311365	52312484
chr2	57575017	57575288	+	Bov-A2	SINE	chr2	57574249	57580574
chr2	61422196	61422463	+	Bov-A2	SINE	chr2	61420463	61423550
chr2	63108353	63108564	-	MER97a	DNA	chr2	63108283	63109835
chr2	65551497	65551758	-	Bov-A2	SINE	chr2	65549734	65552855
chr2	67911389	67911479	+	CHR-2A	SINE	chr2	67910466	67911816
chr2	69705246	69705985	-	Tigger20a	DNA	chr2	69705150	69706553
chr2	70419378	70419472	-	Bov-tA2	SINE	chr2	70416541	70420179
chr2	71501985	71502089	+	L1-2_BT	LINE	chr2	71501749	71502635
chr2	72361053	72361234	+	L1-2_BT	LINE	chr2	72358824	72361861
chr2	79587830	79588031	-	Bov-A2	SINE	chr2	79587328	79588342
chr2	79980731	79981003	+	Bov-A2	SINE	chr2	79980398	79981426
chr2	84230485	84230529	-	BovB	LINE	chr2	84230081	84231052
chr2	84673187	84673430	-	LTR18A_BT	LTR	chr2	84670965	84676502
chr2	88402174	88402365	+	Bov-tA2	SINE	chr2	88400580	88402961
chr2	88502824	88503029	+	Bov-tA3	SINE	chr2	88502637	88503684
chr2	88502906	88503044	+	Bov-A2	SINE	chr2	88502637	88503684
chr2	88521769	88521884	-	MIR3	SINE	chr2	88518991	88522653
chr2	88916808	88917050	-	MER33	DNA	chr2	88914711	88918575
chr2	89753969	89754200	-	Bov-A2	SINE	chr2	89752472	89754443
chr2	90919092	90919285	+	Bov-tA2	SINE	chr2	90919034	90920361
chr2	92986954	92987055	+	Bov-tA1	SINE	chr2	92986163	92988296
chr2	94455126	94455396	+	Bov-A2	SINE	chr2	94454183	94456203
chr2	95653262	95653465	+	Bov-tA2	SINE	chr2	95652849	95653797
chr2	95803286	95804021	+	MER21C_BT	LTR	chr2	95801853	95804571
chr2	100192819	100192964	+	MIR3	SINE	chr2	100191230	100197604
chr2	100717622	100717887	-	L4_C_Mam	LINE	chr2	100717068	100718311
chr2	103922616	103922765	+	Bov-A2	SINE	chr2	103921893	103925787
chr2	104923537	104923807	+	Bov-A2	SINE	chr2	104923385	104924491
chr2	107213047	107213333	-	L2	LINE	chr2	107212720	107215406
chr2	107323998	107324177	+	Bov-tA2	SINE	chr2	107323707	107324813
chr2	107656955	107657157	+	Bov-tA1	SINE	chr2	107656197	107658522
chr2	109618555	109618804	+	BovB	LINE	chr2	109617642	109621105
chr2	110772431	110772551	-	Bov-tA2	SINE	chr2	110771266	110774278
chr2	110794333	110794609	+	Bov-A2	SINE	chr2	110794179	110794697
chr2	111070670	111070934	-	Bov-A2	SINE	chr2	111069910	111071431
chr2	112648432	112649411	+	BovB	LINE	chr2	112648240	112650276
chr2	114725285	114725437	+	BovB	LINE	chr2	114723379	114726587
chr2	118182683	118182774	+	SINE2-1_BT	SINE	chr2	118182083	118183351
chr2	118199146	118199419	+	Bov-A2	SINE	chr2	118198707	118200190
chr2	120304675	120304941	-	Bov-A2	SINE	chr2	120304426	120305391
chr2	121259512	121259735	-	ERV1-3-LTR_BT	LTR	chr2	121258338	121260575
chr2	122102883	122103003	+	MIR3	SINE	chr2	122101930	122104176
chr2	122399012	122399263	+	Bov-A2	SINE	chr2	122398660	122400218
chr2	122544231	122544416	+	Bov-tA2	SINE	chr2	122543867	122545308
chr2	125000988	125001109	+	Bov-A2	SINE	chr2	124999921	125001867
chr2	125236860	125237044	+	Bov-tA2	SINE	chr2	125236278	125237649
chr2	125250359	125250464	-	L2b	LINE	chr2	125249062	125251451
chr2	125327641	125328190	+	L2	LINE	chr2	125326601	125328946
chr2	125427003	125427081	-	L2	LINE	chr2	125426086	125427117
chr2	125427051	125427225	+	MIRb	SINE	chr2	125426086	125427117
chr2	125855053	125855667	-	L1-3_BT	LINE	chr2	125851825	125856684
chr2	126331729	126331991	+	Bov-A2	SINE	chr2	126331360	126332400
chr2	126848903	126849175	+	Bov-A2	SINE	chr2	126848299	126849587
chr2	129267722	129267895	-	Bov-tA2	SINE	chr2	129265846	129270251
chr2	129331242	129331510	+	Bov-A2	SINE	chr2	129330897	129332180
chr2	129632743	129633009	-	Bov-A2	SINE	chr2	129632106	129633811
chr2	129685988	129686100	+	Bov-A2	SINE	chr2	129685001	129686488
chr2	129939582	129939840	+	Bov-A2	SINE	chr2	129938228	129940920
chr2	130771782	130771937	+	MIR	SINE	chr2	130768438	130773787
chr2	130992032	130992484	+	LTR39B_BT	LTR	chr2	130990310	130992846
chr2	131017175	131017364	-	L1ME4b	LINE	chr2	131015879	131018191
chr2	131494048	131494161	+	Bov-A2	SINE	chr2	131492465	131494644
chr2	132200268	132200426	+	Bov-tA2	SINE	chr2	132199953	132201333
chr2	133456578	133457878	-	BovB	LINE	chr2	133455704	133457207
chr2	136177744	136177898	-	Bov-A2	SINE	chr2	136177327	136178576
chr2	136177777	136177918	-	Bov-tA3	SINE	chr2	136177327	136178576
chr20	2683760	2683826	+	L1ME3G	LINE	chr20	2680472	2684346
chr20	3789130	3789414	+	L1ME2	LINE	chr20	3782718	3795952
chr20	6837264	6837398	-	LTR67B	LTR	chr20	6836929	6838684
chr20	7253733	7253786	-	Bov-A2	SINE	chr20	7252734	7254522
chr20	8558784	8559044	-	Bov-A2	SINE	chr20	8558180	8559661
chr20	8656155	8656299	+	Bov-tA3	SINE	chr20	8655873	8657393
chr20	13640563	13640597	+	MIR3	SINE	chr20	13638902	13640988
chr20	13760927	13761129	+	Bov-tA1	SINE	chr20	13759373	13762830
chr20	18336961	18337418	-	MLT1J	LTR	chr20	18336069	18339880
chr20	18398435	18398642	-	Bov-tA2	SINE	chr20	18397785	18398758
chr20	22399749	22399891	+	Bov-tA3	SINE	chr20	22394681	22403987
chr20	22529276	22529669	+	MLT1J	LTR	chr20	22527999	22531698
chr20	23305623	23306819	-	L4_C_Mam	LINE	chr20	23305213	23306795
chr20	23795782	23796049	+	Bov-A2	SINE	chr20	23795897	23796488
chr20	23822284	23822554	+	Bov-A2	SINE	chr20	23821708	23823548
chr20	24285464	24285910	+	LTR16A	LTR	chr20	24283281	24286339
chr20	25788647	25788749	-	L2b	LINE	chr20	25786615	25792709
chr20	26070757	26070958	+	Bov-tA2	SINE	chr20	26069873	26072808
chr20	26330960	26331246	+	MLT1C	LTR	chr20	26329933	26334345
chr20	28547846	28548219	+	LTR37-int	LTR	chr20	28547215	28549054
chr20	31359332	31359603	-	Bov-A2	SINE	chr20	31354404	31360496
chr20	33684980	33685185	-	Bov-tA2	SINE	chr20	33684430	33685683
chr20	37113867	37114005	-	L2b	LINE	chr20	37113294	37114827
chr20	37312036	37312115	+	Bov-tA3	SINE	chr20	37311117	37312847
chr20	37791206	37791474	+	Bov-A2	SINE	chr20	37790915	37791726
chr20	40329392	40329602	+	MER20	DNA	chr20	40329351	40330157
chr20	41135761	41135989	+	Bov-A2	SINE	chr20	41134618	41137482
chr20	41409594	41410249	+	LTR1_BT	LTR	chr20	41407000	41412322
chr20	56246293	56246397	-	MER20	DNA	chr20	56239191	56246940
chr20	58867334	58867468	-	Bov-A2	SINE	chr20	58864348	58870125
chr20	59091946	59092266	-	MER99	DNA	chr20	59091445	59093081
chr20	62677262	62677439	+	Bov-A2	SINE	chr20	62669658	62684261
chr20	62710318	62710619	-	MER41_BT	LTR	chr20	62708099	62714320
chr20	66467430	66467698	+	Bov-A2	SINE	chr20	66466919	66468337
chr20	67285572	67285801	-	BovB	LINE	chr20	67284386	67286620
chr20	68156870	68157006	-	Bov-A2	SINE	chr20	68156662	68157265
chr21	5438030	5438199	+	LTR67B	LTR	chr21	5437655	5438536
chr21	5557155	5557547	-	BovB	LINE	chr21	5554833	5558467
chr21	5563317	5563571	-	Bov-A2	SINE	chr21	5563042	5563851
chr21	14200522	14200707	-	Bov-tA2	SINE	chr21	14199976	14202260
chr21	15002399	15002583	+	Bov-A2	SINE	chr21	15001716	15002691
chr21	15280714	15280989	-	MER41_BT	LTR	chr21	15280015	15281056
chr21	15361339	15361961	-	Tigger17a	DNA	chr21	15357767	15364552
chr21	19928770	19928909	-	Bov-A2	SINE	chr21	19927978	19929407
chr21	19928790	19928913	-	Bov-tA2	SINE	chr21	19927978	19929407
chr21	20040310	20040516	+	Bov-tA3	SINE	chr21	20039851	20042656
chr21	20768700	20768945	-	Bov-A2	SINE	chr21	20768315	20769163
chr21	21705358	21705470	+	Bov-A2	SINE	chr21	21704251	21705875
chr21	23198270	23198324	-	L2b	LINE	chr21	23197030	23199940
chr21	23295539	23296836	+	BovB	LINE	chr21	23296256	23299319
chr21	24433267	24433473	+	Bov-tA2	SINE	chr21	24432832	24434166
chr21	26081182	26081272	-	MLT1K	LTR	chr21	26078892	26090505
chr21	31830829	31831213	-	L1ME1	LINE	chr21	31830590	31831989
chr21	33667720	33667943	+	L2d	LINE	chr21	33662338	33669577
chr21	40181607	40181749	-	Bov-A2	SINE	chr21	40180773	40182079
chr21	40181628	40181837	-	Bov-tA3	SINE	chr21	40180773	40182079
chr21	41681093	41681362	+	Bov-A2	SINE	chr21	41679861	41682033
chr21	42261430	42261600	-	L2	LINE	chr21	42261047	42261606
chr21	42286788	42287059	+	Bov-A2	SINE	chr21	42286091	42287748
chr21	44501164	44501323	-	Bov-A2	SINE	chr21	44500313	44501801
chr21	54785346	54785530	+	L2	LINE	chr21	54784704	54786283
chr21	56166251	56166520	-	Bov-A2	SINE	chr21	56165693	56166838
chr21	56481284	56481684	+	LTR86B1	LTR	chr21	56480071	56485517
chr21	57740756	57740899	-	Bov-A2	SINE	chr21	57739471	57743014
chr21	58703249	58703986	-	L1MB2	LINE	chr21	58702898	58703768
chr21	61379974	61380173	-	Bov-tA3	SINE	chr21	61378507	61381207
chr21	62906523	62906740	+	MIRb	SINE	chr21	62905610	62907345
chr21	64818503	64818759	-	Bov-A2	SINE	chr21	64818334	64819307
chr21	65156353	65156625	-	Bov-A2	SINE	chr21	65155142	65157338
chr21	67020839	67021093	+	Bov-A2	SINE	chr21	67020320	67022768
chr21	68398997	68399194	+	Bov-A2	SINE	chr21	68398702	68399482
chr22	247399	247641	-	Bov-A2	SINE	chr22	247050	249017
chr22	6068966	6069061	+	MIR	SINE	chr22	6065097	6071254
chr22	6921966	6922151	+	Bov-tA2	SINE	chr22	6920381	6924066
chr22	8052123	8052374	+	Bov-A2	SINE	chr22	8051394	8053702
chr22	11298984	11299126	+	Bov-A2	SINE	chr22	11298663	11299537
chr22	15547021	15547234	-	Tigger2a_Art	DNA	chr22	15545950	15548265
chr22	17174773	17175040	-	Bov-A2	SINE	chr22	17174496	17175568
chr22	17194900	17195172	-	Bov-A2	SINE	chr22	17194414	17195384
chr22	17245453	17245713	+	BovB	LINE	chr22	17243950	17246632
chr22	17270399	17270839	-	MLT1H2	LTR	chr22	17266751	17271574
chr22	18950014	18950279	-	Bov-A2	SINE	chr22	18949262	18951163
chr22	21472939	21473037	+	UCON66	Unknown	chr22	21471713	21474108
chr22	25269101	25269256	-	Bov-A2	SINE	chr22	25267131	25269763
chr22	27902169	27902726	+	LTR10_EC	LTR	chr22	27901512	27906153
chr22	28663312	28663500	-	Bov-tA2	SINE	chr22	28662092	28665574
chr22	28684431	28684497	+	L2	LINE	chr22	28682703	28686457
chr22	28906498	28906849	-	L1ME3D	LINE	chr22	28905455	28907695
chr22	30713645	30714274	+	L1ME3D	LINE	chr22	30713197	30715964
chr22	31885129	31885397	-	MamGypLTR1b	LTR	chr22	31884457	31886237
chr22	32346753	32346958	-	Bov-tA3	SINE	chr22	32346527	32347797
chr22	33863204	33863388	+	Bov-tA2	SINE	chr22	33859008	33864255
chr22	39787249	39787436	+	Bov-tA2	SINE	chr22	39786461	39788020
chr22	43554003	43554187	+	Bov-tA2	SINE	chr22	43553191	43554995
chr22	43633517	43633776	-	Bov-A2	SINE	chr22	43633138	43634092
chr22	47677540	47677705	+	MIRc	SINE	chr22	47675582	47678266
chr22	51804310	51804472	+	Bov-tA3	SINE	chr22	51802998	51806989
chr22	51844993	51845129	-	Bov-A2	SINE	chr22	51843359	51846506
chr22	51850470	51850674	+	Bov-tA2	SINE	chr22	51848526	51850940
chr22	52565339	52565422	+	L2c	LINE	chr22	52563109	52566427
chr22	53389021	53389277	+	L3	LINE	chr22	53386909	53391371
chr22	53466744	53466847	-	Bov-tA2	SINE	chr22	53465841	53468123
chr22	59454861	59455218	+	L1MB3	LINE	chr22	59454609	59455883
chr23	3105624	3105889	-	Bov-A2	SINE	chr23	3105537	3106479
chr23	3410051	3410221	-	HAL1	LINE	chr23	3409574	3410591
chr23	5507969	5509259	-	BovB	LINE	chr23	5507453	5508852
chr23	6932370	6932482	+	BovB	LINE	chr23	6930949	6934005
chr23	9578473	9578661	-	Bov-tA2	SINE	chr23	9571503	9580240
chr23	11762860	11763129	+	Bov-A2	SINE	chr23	11762441	11763568
chr23	11842612	11842883	+	Bov-A2	SINE	chr23	11842141	11843614
chr23	12454289	12454561	-	Bov-A2	SINE	chr23	12451729	12458218
chr23	15657051	15657231	+	Bov-tA2	SINE	chr23	15655776	15657874
chr23	15884780	15884983	+	MER63A	DNA	chr23	15884185	15885953
chr23	17004106	17004378	+	Bov-A2	SINE	chr23	17002540	17004847
chr23	20608516	20608787	+	Bov-A2	SINE	chr23	20606678	20610358
chr23	24747020	24747292	+	Bov-A2	SINE	chr23	24745624	24751368
chr23	25181931	25181988	+	Bov-A2	SINE	chr23	25181223	25182474
chr23	27187673	27187870	+	MIRb	SINE	chr23	27186042	27189226
chr23	27583922	27584186	-	Bov-A2	SINE	chr23	27583324	27585726
chr23	27738370	27738641	-	Bov-A2	SINE	chr23	27737659	27739143
chr23	28243146	28243264	+	SINE2-1_BT	SINE	chr23	28241468	28243881
chr23	28791878	28792381	-	ALTR2B1_BT	LTR	chr23	28790209	28793789
chr23	28949873	28950251	+	Bov-A2	SINE	chr23	28945671	28951064
chr23	30944259	30944485	+	Bov-A2	SINE	chr23	30942803	30944965
chr23	31056264	31056524	-	Bov-A2	SINE	chr23	31053671	31057135
chr23	31601591	31601940	+	MER77B	LTR	chr23	31601324	31603049
chr23	33410173	33410373	-	Bov-tA3	SINE	chr23	33408173	33411225
chr23	37038530	37039069	+	LTR39_BT	LTR	chr23	37037146	37039878
chr23	39672508	39672690	-	Bov-A2	SINE	chr23	39672095	39672949
chr23	39783709	39783969	-	Bov-A2	SINE	chr23	39783249	39785304
chr23	39858928	39859070	+	Bov-tA3	SINE	chr23	39858546	39859379
chr23	40714617	40714857	-	MIRb	SINE	chr23	40713318	40715232
chr23	44906643	44906788	-	MLT1C	LTR	chr23	44903273	44907733
chr23	45870218	45870310	-	MIRb	SINE	chr23	45867919	45871324
chr23	47355958	47356296	-	L1MA9	LINE	chr23	47355378	47356253
chr23	47987867	47988371	-	MER68	LTR	chr23	47986586	47989250
chr23	50355062	50355242	+	Bov-tA2	SINE	chr23	50354620	50356393
chr23	50467352	50468012	-	L1ME1	LINE	chr23	50467844	50468855
chr23	50543795	50543962	+	Bov-tA2	SINE	chr23	50542968	50544484
chr23	50797519	50798023	-	MER21C	LTR	chr23	50796317	50800046
chr23	52489307	52489448	-	Bov-tA3	SINE	chr23	52489058	52490169
chr24	20041520	20041785	+	Bov-A2	SINE	chr24	20040752	20042310
chr24	21469026	21469227	-	Bov-tA2	SINE	chr24	21468573	21469558
chr24	22125378	22125583	+	Bov-tA2	SINE	chr24	22124881	22126871
chr24	26294177	26294329	-	MIRc	SINE	chr24	26293507	26295479
chr24	28801382	28801653	-	Bov-A2	SINE	chr24	28799668	28802424
chr24	30375132	30375265	-	Bov-tA2	SINE	chr24	30374367	30375936
chr24	32497896	32498098	+	Bov-tA2	SINE	chr24	32496076	32499054
chr24	32623056	32623725	+	L1ME3	LINE	chr24	32621570	32624101
chr24	33210230	33210278	-	Bov-A2	SINE	chr24	33209715	33210733
chr24	35216331	35216591	-	Bov-A2	SINE	chr24	35215808	35216977
chr24	36951377	36952402	-	L1MB8	LINE	chr24	36951503	36952476
chr24	37395268	37395539	-	Bov-A2	SINE	chr24	37394523	37396076
chr24	39425476	39425666	-	Bov-tA2	SINE	chr24	39424128	39426402
chr24	41679508	41679762	-	Bov-A2	SINE	chr24	41679110	41679915
chr24	41759450	41759713	+	L1ME3A	LINE	chr24	41757178	41761281
chr24	41898458	41898661	+	Bov-tA2	SINE	chr24	41896387	41898949
chr24	41934798	41934875	+	Bov-A2	SINE	chr24	41932847	41935613
chr24	42728900	42729084	+	Bov-tA2	SINE	chr24	42728744	42729682
chr24	43083410	43083622	-	Bov-tA2	SINE	chr24	43082018	43085280
chr24	44507525	44508085	-	L3	LINE	chr24	44505924	44510159
chr24	44574909	44575180	-	Bov-A2	SINE	chr24	44574330	44577096
chr24	47714293	47714437	+	Bov-A2	SINE	chr24	47713658	47716787
chr24	47714414	47714473	-	Bov-tA3	SINE	chr24	47713658	47716787
chr24	52371383	52371682	-	L1MB1	LINE	chr24	52369310	52372697
chr24	57167912	57168170	+	MER102c	DNA	chr24	57160394	57169284
chr24	57209895	57210030	+	Bov-A2	SINE	chr24	57208613	57210722
chr24	57220330	57220699	+	Tigger6a	DNA	chr24	57213942	57221350
chr24	57264512	57264649	+	L3b	LINE	chr24	57261001	57266824
chr24	60608963	60609163	-	Bov-A2	SINE	chr24	60607239	60610747
chr25	2311607	2311830	+	Bov-tA1	SINE	chr25	2310808	2313411
chr25	7647403	7647607	-	Bov-tA3	SINE	chr25	7646543	7648198
chr25	8764273	8764470	+	Bov-tA2	SINE	chr25	8758131	8765569
chr25	8785385	8785547	+	MLT1L	LTR	chr25	8782006	8789638
chr25	9498719	9498819	-	Bov-tA2	SINE	chr25	9497136	9499728
chr25	15682644	15682933	+	L2	LINE	chr25	15681204	15684717
chr25	16895368	16895751	-	MLT1F	LTR	chr25	16893923	16896943
chr25	17209741	17210006	-	Bov-A2	SINE	chr25	17208910	17210599
chr25	18687527	18687792	-	Bov-A2	SINE	chr25	18684851	18689433
chr25	19766037	19766158	+	Bov-A2	SINE	chr25	19764249	19767550
chr25	19945419	19945485	-	SINE2-2_BT	SINE	chr25	19943191	19945910
chr25	22194220	22194336	-	MER45A	DNA	chr25	22192612	22194453
chr25	22205842	22206045	-	Bov-tA3	SINE	chr25	22205370	22208154
chr25	22218664	22218742	+	MIRb	SINE	chr25	22218216	22219200
chr25	22657697	22657902	-	Bov-tA2	SINE	chr25	22656903	22659449
chr25	23575947	23576106	-	L1-2_BT	LINE	chr25	23575165	23576676
chr25	24932948	24933218	+	Bov-A2	SINE	chr25	24932169	24933267
chr25	24980283	24980944	-	L1MEg	LINE	chr25	24980431	24981546
chr25	25649105	25649206	+	CR1_Mam	LINE	chr25	25648573	25650478
chr25	25729156	25729222	+	MIRb	SINE	chr25	25728406	25729877
chr25	26422158	26422244	-	MIRb	SINE	chr25	26421069	26423112
chr25	27386514	27386723	-	Bov-tA2	SINE	chr25	27384043	27387551
chr25	27390580	27390820	+	Bov-A2	SINE	chr25	27388320	27391276
chr25	30399254	30399559	+	Bov-A2	SINE	chr25	30399077	30400028
chr25	30596684	30596806	-	Bov-A2	SINE	chr25	30595322	30600495
chr25	30650500	30650567	-	Bov-tA3	SINE	chr25	30649311	30651342
chr25	33926519	33926786	+	Bov-A2	SINE	chr25	33926302	33927972
chr25	34753775	34753959	+	Bov-A2	SINE	chr25	34753293	34754691
chr25	35582874	35583136	-	Bov-A2	SINE	chr25	35582278	35585108
chr25	37168695	37168769	-	Bov-A2	SINE	chr25	37164926	37178968
chr25	37821397	37821650	+	MIRb	SINE	chr25	37819926	37823017
chr25	40721846	40722239	-	L1MB5	LINE	chr25	40721375	40723118
chr25	41015411	41015536	-	Bov-A2	SINE	chr25	41014626	41015898
chr25	42320853	42320994	-	Bov-tA3	SINE	chr25	42320663	42321264
chr26	8821464	8821594	-	MIRb	SINE	chr26	8819107	8823139
chr26	9161473	9161678	-	L1ME1	LINE	chr26	9160966	9162400
chr26	11362127	11363907	-	L1M5	LINE	chr26	11362317	11364981
chr26	13923871	13923989	+	L2c	LINE	chr26	13922622	13925319
chr26	14678262	14678382	-	Bov-A2	SINE	chr26	14677786	14678911
chr26	14678275	14678464	-	Bov-tA3	SINE	chr26	14677786	14678911
chr26	14747515	14748076	+	LTR39B_BT	LTR	chr26	14742067	14749343
chr26	14804138	14804342	+	Bov-tA2	SINE	chr26	14801339	14805763
chr26	14832684	14832865	+	Bov-tA2	SINE	chr26	14832064	14833684
chr26	17137064	17137243	-	Bov-tA2	SINE	chr26	17136683	17137505
chr26	17145306	17145389	-	Bov-A2	SINE	chr26	17144877	17145793
chr26	17399252	17399478	+	MIR	SINE	chr26	17398416	17400144
chr26	18801730	18801910	-	Bov-tA2	SINE	chr26	18800780	18802502
chr26	19092718	19092849	+	Bov-A2	SINE	chr26	19091123	19093125
chr26	19350523	19350780	+	Bov-A2	SINE	chr26	19348600	19351172
chr26	20700613	20700815	+	Bov-tA2	SINE	chr26	20700380	20701405
chr26	20700695	20700832	+	Bov-A2	SINE	chr26	20700380	20701405
chr26	21776679	21776888	-	Bov-tA2	SINE	chr26	21775553	21777199
chr26	22382163	22382432	-	Bov-A2	SINE	chr26	22381605	22382653
chr26	23960920	23961222	+	MER21C	LTR	chr26	23959919	23963093
chr26	25627249	25627645	-	Zaphod	DNA	chr26	25627021	25628141
chr26	33559491	33559763	+	Bov-A2	SINE	chr26	33558999	33560910
chr26	33995140	33995399	-	Bov-A2	SINE	chr26	33994322	33995996
chr26	34326763	34327045	-	L1MEf	LINE	chr26	34325132	34327726
chr26	35072207	35072369	+	Bov-A2	SINE	chr26	35069247	35072842
chr26	38446542	38446984	-	L1MC4	LINE	chr26	38444903	38446888
chr26	39247881	39248153	-	Bov-A2	SINE	chr26	39247250	39248433
chr26	40992692	40992905	-	MLT1K	LTR	chr26	40991272	40993809
chr26	42071028	42071081	-	Bov-A2	SINE	chr26	42070757	42071687
chr26	42220853	42221545	-	L1ME1	LINE	chr26	42218416	42221229
chr26	44052344	44052411	+	Bov-tA3	SINE	chr26	44051582	44060434
chr26	44104064	44104266	+	Bov-tA2	SINE	chr26	44102470	44105308
chr26	44130746	44130952	+	Bov-tA2	SINE	chr26	44128780	44131909
chr26	44613386	44613578	+	L3	LINE	chr26	44613074	44614316
chr26	44634211	44634538	+	CHR-2A	SINE	chr26	44630519	44644555
chr26	45233133	45233331	-	MIRb	SINE	chr26	45232548	45234230
chr27	1268816	1269087	+	Bov-A2	SINE	chr27	1268481	1269384
chr27	7105481	7105736	-	MER41_BT	LTR	chr27	7103795	7106475
chr27	7215628	7215900	+	Bov-A2	SINE	chr27	7210467	7216869
chr27	11434220	11434480	-	Bov-A2	SINE	chr27	11432732	11435742
chr27	14433508	14433648	+	Tigger1a_Art	DNA	chr27	14431333	14434380
chr27	14675666	14676067	-	Helitron3Na_Mam	RC	chr27	14674872	14676157
chr27	16743837	16744109	+	Bov-A2	SINE	chr27	16743023	16744372
chr27	16769204	16769303	+	BovB	LINE	chr27	16765476	16771768
chr27	16910871	16911355	-	MLT1F2	LTR	chr27	16910719	16911798
chr27	20543309	20543456	+	MIR3	SINE	chr27	20542595	20543830
chr27	20545259	20545535	-	MLT1I	LTR	chr27	20544599	20546160
chr27	24704750	24704949	-	Bov-tA2	SINE	chr27	24704096	24705712
chr27	24938626	24938868	-	Bov-A2	SINE	chr27	24934981	24940699
chr27	26159113	26159625	+	MER87_BT	LTR	chr27	26157579	26159932
chr27	26239881	26240051	-	Bov-tA2	SINE	chr27	26239410	26240780
chr27	26296676	26296918	-	Bov-A2	SINE	chr27	26296129	26297314
chr27	26907872	26907981	-	L1MC	LINE	chr27	26907286	26908269
chr27	34143236	34143376	-	Bov-A2	SINE	chr27	34140410	34144780
chr27	34143262	34143455	-	Bov-tA3	SINE	chr27	34140410	34144780
chr27	34172393	34172597	-	Bov-tA3	SINE	chr27	34170138	34173754
chr27	35050602	35050697	-	MER81	DNA	chr27	35050205	35051765
chr27	35135124	35135218	+	MLT1J	LTR	chr27	35133961	35136668
chr27	36943698	36943891	+	Bov-tA2	SINE	chr27	36943019	36944513
chr27	37187275	37187566	+	Bov-A2	SINE	chr27	37185718	37188412
chr27	38071687	38071792	-	MER119	DNA	chr27	38071342	38072650
chr27	44361744	44361914	+	Bov-tA3	SINE	chr27	44361000	44362867
chr28	5340684	5340910	+	Bov-A2	SINE	chr28	5338951	5341657
chr28	9423381	9423640	+	Bov-A2	SINE	chr28	9422574	9425152
chr28	14008931	14009203	+	Bov-A2	SINE	chr28	14002878	14011939
chr28	14052450	14052722	-	Bov-A2	SINE	chr28	14047042	14054438
chr28	17332001	17332273	+	Bov-A2	SINE	chr28	17331132	17332874
chr28	17349609	17349722	-	Bov-A2	SINE	chr28	17348082	17350368
chr28	18199362	18199858	+	MER21C	LTR	chr28	18197442	18200499
chr28	19042828	19043099	+	Bov-A2	SINE	chr28	19042235	19044532
chr28	19431190	19431306	+	Bov-A2	SINE	chr28	19430009	19432507
chr28	19695578	19695846	+	Bov-A2	SINE	chr28	19695094	19696488
chr28	24585439	24585709	-	Bov-A2	SINE	chr28	24585202	24586675
chr28	25262316	25262515	+	Bov-A2	SINE	chr28	25261279	25263208
chr28	25722912	25723014	+	MIRc	SINE	chr28	25718742	25724142
chr28	27465944	27466208	-	LTR10B_BT	LTR	chr28	27464490	27466639
chr28	29231905	29232114	+	Bov-tA2	SINE	chr28	29231681	29232746
chr28	29927250	29927461	+	Bov-tA2	SINE	chr28	29919815	29934791
chr28	30218067	30218528	+	L1MD2	LINE	chr28	30217051	30219318
chr28	33632829	33633094	-	Bov-A2	SINE	chr28	33631084	33634579
chr28	36961407	36961583	-	Bov-tA2	SINE	chr28	36960790	36962466
chr28	37228019	37231143	-	L1MB3	LINE	chr28	37230776	37231646
chr28	44274007	44274143	-	Bov-A2	SINE	chr28	44273246	44274423
chr28	44274022	44274227	-	Bov-tA3	SINE	chr28	44273246	44274423
chr28	45363649	45363728	-	L2a	LINE	chr28	45362605	45365525
chr28	45787573	45787761	-	Bov-A2	SINE	chr28	45787251	45788507
chr28	45861806	45861939	-	Bov-A2	SINE	chr28	45861599	45862316
chr28	45861820	45861959	-	Bov-tA3	SINE	chr28	45861599	45862316
chr29	641708	641980	+	Bov-A2	SINE	chr29	641293	642375
chr29	1023435	1023701	-	Bov-A2	SINE	chr29	1022900	1023907
chr29	8058261	8058638	+	ERV54-EC_LTR	LTR	chr29	8057050	8060254
chr29	8420933	8421009	+	Bov-tA2	SINE	chr29	8419981	8421905
chr29	8562444	8562649	-	Bov-tA2	SINE	chr29	8561983	8563327
chr29	8804132	8804328	-	Bov-tA2	SINE	chr29	8801835	8805153
chr29	9002187	9002289	-	L2d2	LINE	chr29	8999853	9003075
chr29	12407750	12408020	+	Bov-A2	SINE	chr29	12406773	12409258
chr29	12476939	12477147	+	Bov-tA3	SINE	chr29	12475417	12478256
chr29	16793483	16793642	-	MIRc	SINE	chr29	16793018	16794075
chr29	17734194	17735407	-	L2a	LINE	chr29	17733616	17736160
chr29	25753628	25753759	+	MER5A1	DNA	chr29	25750836	25754854
chr29	29022082	29022276	-	Bov-tA2	SINE	chr29	29021701	29022989
chr29	31537203	31537310	+	L2c	LINE	chr29	31536232	31538248
chr29	36301950	36302213	+	Bov-A2	SINE	chr29	36297913	36302666
chr29	36449047	36449159	+	Bov-A2	SINE	chr29	36448776	36449375
chr29	37465104	37465173	-	Bov-tA2	SINE	chr29	37464651	37465909
chr29	37474314	37475569	+	L1MEc	LINE	chr29	37475061	37476093
chr29	42083227	42083486	-	Bov-A2	SINE	chr29	42082851	42083774
chr29	42220782	42221054	+	Bov-A2	SINE	chr29	42220503	42222144
chr29	43738657	43738771	+	Bov-A2	SINE	chr29	43737683	43739396
chr29	43870218	43870329	+	MER99	DNA	chr29	43869964	43871484
chr29	45170990	45171259	+	Bov-A2	SINE	chr29	45170664	45171481
chr29	45183507	45183624	+	MER45R	DNA	chr29	45182722	45183842
chr29	46202509	46202660	+	Bov-tA3	SINE	chr29	46202105	46202916
chr29	46202541	46202794	+	Bov-A2	SINE	chr29	46202105	46202916
chr29	47475744	47476016	+	Bov-A2	SINE	chr29	47475100	47476594
chr29	48380950	48381318	-	L1-2_BT	LINE	chr29	48380501	48381893
chr3	586481	586685	+	Bov-A2	SINE	chr3	584414	588858
chr3	649563	649743	-	Bov-tA2	SINE	chr3	648711	651881
chr3	649741	649821	+	LTR10A_BT	LTR	chr3	648711	651881
chr3	986959	987427	+	ERVL-B4-int	LTR	chr3	986907	989643
chr3	1442835	1443828	+	BovB	LINE	chr3	1443107	1444248
chr3	1921348	1921620	+	Bov-A2	SINE	chr3	1920438	1922328
chr3	2993306	2993426	+	MIRc	SINE	chr3	2985279	2996736
chr3	3001379	3001557	-	BovB	LINE	chr3	2997006	3003904
chr3	3022981	3023251	-	Bov-A2	SINE	chr3	3020336	3024918
chr3	3066806	3067169	-	L1M4a1	LINE	chr3	3066429	3067989
chr3	3227796	3228068	+	Bov-A2	SINE	chr3	3226500	3229697
chr3	7311267	7311567	+	L1MA9	LINE	chr3	7310793	7311981
chr3	10916191	10916308	+	MER5A	DNA	chr3	10915752	10916870
chr3	12338083	12338280	-	Bov-tA3	SINE	chr3	12337655	12340824
chr3	13818310	13818873	-	L2b	LINE	chr3	13818216	13819297
chr3	14059550	14059701	-	Bov-A2	SINE	chr3	14058629	14060418
chr3	14901338	14901519	-	Bov-tA2	SINE	chr3	14900690	14901962
chr3	15202716	15202959	+	Bov-A2	SINE	chr3	15202196	15203081
chr3	16274071	16274330	+	Bov-A2	SINE	chr3	16273749	16274799
chr3	16547316	16547502	-	Bov-tA2	SINE	chr3	16546235	16547557
chr3	18734676	18734937	-	Bov-A2	SINE	chr3	18734284	18735760
chr3	18795250	18795551	+	LTR16C	LTR	chr3	18794042	18797851
chr3	19344403	19344866	+	L1MB7	LINE	chr3	19344110	19345670
chr3	19862534	19862800	+	Bov-A2	SINE	chr3	19861970	19863568
chr3	20042530	20042794	-	Bov-A2	SINE	chr3	20041852	20043580
chr3	20294712	20294930	-	Bov-A2	SINE	chr3	20293440	20297569
chr3	20499725	20499979	+	Bov-A2	SINE	chr3	20499214	20500743
chr3	20655531	20655801	+	Bov-A2	SINE	chr3	20654802	20657719
chr3	21351404	21351672	+	Bov-A2	SINE	chr3	21351097	21351730
chr3	21948393	21948684	-	LTR45_BT	LTR	chr3	21947221	21951105
chr3	22427148	22427462	+	LTR86C	LTR	chr3	22426654	22427770
chr3	29931891	29931958	+	Bov-tA3	SINE	chr3	29930863	29933314
chr3	30441809	30442215	-	MER41_BT	LTR	chr3	30441257	30442602
chr3	30464874	30465062	-	MLT1J	LTR	chr3	30464288	30465968
chr3	30677548	30677814	-	Bov-A2	SINE	chr3	30677057	30678361
chr3	30708354	30708626	+	Bov-A2	SINE	chr3	30707614	30709282
chr3	30727852	30731218	+	L1M4	LINE	chr3	30728089	30729540
chr3	30795274	30795479	-	Bov-tA2	SINE	chr3	30793522	30795780
chr3	31396450	31396665	-	Bov-tA2	SINE	chr3	31394268	31397905
chr3	32273083	32273213	+	Bov-A2	SINE	chr3	32271286	32274225
chr3	33415551	33415692	-	Bov-A2	SINE	chr3	33414968	33417036
chr3	33618382	33618501	+	Bov-A2	SINE	chr3	33617966	33619390
chr3	34240973	34241243	+	Bov-A2	SINE	chr3	34238728	34241877
chr3	34612619	34612755	+	Bov-A2	SINE	chr3	34612577	34613319
chr3	36595537	36595806	+	Bov-A2	SINE	chr3	36594820	36596336
chr3	40516979	40517247	-	Bov-A2	SINE	chr3	40516391	40518026
chr3	43159538	43160191	+	Mariner1_BT	DNA	chr3	43159069	43160490
chr3	45663342	45663509	-	L2c	LINE	chr3	45662013	45664791
chr3	48663021	48663224	+	Bov-tA2	SINE	chr3	48660452	48664171
chr3	49656190	49656392	-	MER63A	DNA	chr3	49654850	49657164
chr3	50147665	50148902	-	L2a	LINE	chr3	50144561	50150607
chr3	53252821	53252936	+	Bov-A2	SINE	chr3	53251787	53254041
chr3	53903399	53903661	-	LTR16A1	LTR	chr3	53902540	53905972
chr3	54945097	54945357	+	Bov-A2	SINE	chr3	54942041	54947082
chr3	55011838	55012030	+	L1MB7	LINE	chr3	55011033	55013004
chr3	55016681	55016952	+	Bov-A2	SINE	chr3	55014558	55018233
chr3	57182179	57182498	+	CHR-2	SINE	chr3	57181084	57183048
chr3	59507551	59507711	-	HAL1	LINE	chr3	59507315	59507745
chr3	59597139	59597399	+	Bov-A2	SINE	chr3	59596657	59597735
chr3	66877875	66878383	+	L1MB2	LINE	chr3	66877021	66881711
chr3	67035255	67035523	-	Bov-A2	SINE	chr3	67034527	67035535
chr3	67057497	67057745	+	Bov-A2	SINE	chr3	67057234	67057800
chr3	67071265	67071406	-	Bov-A2	SINE	chr3	67070019	67072175
chr3	67071281	67071486	-	Bov-tA3	SINE	chr3	67070019	67072175
chr3	76796104	76796283	-	LTR16	LTR	chr3	76794327	76797300
chr3	76822927	76823197	-	Bov-A2	SINE	chr3	76822304	76824814
chr3	77141693	77141919	+	Bov-A2	SINE	chr3	77140877	77143210
chr3	77638515	77638601	+	L2c	LINE	chr3	77637851	77639518
chr3	77814138	77814324	+	MIRc	SINE	chr3	77813180	77815616
chr3	78951202	78951602	+	L2a	LINE	chr3	78950569	78952040
chr3	81631308	81631586	-	Bov-A2	SINE	chr3	81631074	81631767
chr3	81701571	81701606	+	L2c	LINE	chr3	81700202	81702741
chr3	82185119	82185388	-	Bov-A2	SINE	chr3	82184650	82185622
chr3	83107450	83107588	-	Bov-A2	SINE	chr3	83106662	83108025
chr3	83107478	83107661	-	Bov-tA3	SINE	chr3	83106662	83108025
chr3	83535248	83535417	+	ERV54-EC_LTR	LTR	chr3	83533967	83537286
chr3	84286001	84286206	-	Bov-tA2	SINE	chr3	84284781	84286991
chr3	85869790	85869902	-	Bov-tA3	SINE	chr3	85868964	85870840
chr3	85869879	85870147	+	Bov-A2	SINE	chr3	85868964	85870840
chr3	86117114	86117823	+	L1MB8	LINE	chr3	86116589	86118085
chr3	86410276	86410425	+	MER5A	DNA	chr3	86409565	86412195
chr3	86701071	86701343	-	Bov-A2	SINE	chr3	86700800	86701977
chr3	87030896	87031541	-	L1ME3Cz	LINE	chr3	87030539	87031834
chr3	89704286	89704558	+	Bov-A2	SINE	chr3	89702096	89705518
chr3	91160705	91160860	-	Tigger1	DNA	chr3	91159490	91161547
chr3	91219123	91219330	-	L2c	LINE	chr3	91218219	91219348
chr3	92123255	92123553	+	Bov-A2	SINE	chr3	92122944	92123865
chr3	92125750	92126675	-	ERV3-16A3_I-int	LTR	chr3	92124673	92127010
chr3	92965737	92965951	+	MamRep564	Unknown	chr3	92963982	92966173
chr3	93862231	93862508	+	Bov-A2	SINE	chr3	93861695	93864265
chr3	95514619	95515627	-	Tigger1	DNA	chr3	95514018	95516006
chr3	98026089	98026190	+	L1MCa	LINE	chr3	98023926	98027119
chr3	99760606	99760905	+	MLT1J	LTR	chr3	99760516	99761252
chr3	100476361	100476566	+	Bov-tA3	SINE	chr3	100475824	100477796
chr3	100476445	100476583	+	Bov-A2	SINE	chr3	100475824	100477796
chr3	102531430	102531702	-	Bov-A2	SINE	chr3	102530954	102532605
chr3	103980962	103981167	+	Bov-A2	SINE	chr3	103980285	103981505
chr3	105962034	105962306	+	Bov-A2	SINE	chr3	105961923	105962591
chr3	113003040	113003284	-	BovB	LINE	chr3	112999745	113004704
chr3	116647079	116647249	-	LTR16C	LTR	chr3	116645458	116648447
chr3	119455912	119456149	-	Bov-A2	SINE	chr3	119454591	119458110
chr3	119798631	119798772	+	ERV1-1B-LTR_BT	LTR	chr3	119798154	119799270
chr4	5176848	5176966	+	Bov-A2	SINE	chr4	5176271	5177454
chr4	7923854	7924151	-	HAL1	LINE	chr4	7923494	7925312
chr4	9618050	9618123	-	MIRb	SINE	chr4	9616523	9619889
chr4	10672052	10672119	+	Bov-tA3	SINE	chr4	10671451	10672703
chr4	12469591	12469724	-	L1ME4a	LINE	chr4	12468970	12470333
chr4	15828245	15828416	-	Bov-tA2	SINE	chr4	15826908	15832235
chr4	19212485	19212622	-	Bov-A2	SINE	chr4	19212053	19212530
chr4	25094071	25094247	-	L2c	LINE	chr4	25091961	25095726
chr4	25588596	25588961	-	MamRTE1	LINE	chr4	25587540	25589845
chr4	26015151	26015333	+	Bov-tA2	SINE	chr4	26015235	26016144
chr4	28528640	28528845	-	Bov-tA2	SINE	chr4	28527287	28529107
chr4	31518258	31518377	-	MER5A	DNA	chr4	31517379	31518800
chr4	31535257	31535532	+	Bov-A2	SINE	chr4	31534673	31535586
chr4	38103651	38103968	+	MER77B	LTR	chr4	38103129	38104864
chr4	38800098	38800297	-	Bov-tA2	SINE	chr4	38799415	38803055
chr4	44076743	44077899	-	BTLTR1F	LTR	chr4	44075410	44078751
chr4	44329374	44329579	+	Bov-tA2	SINE	chr4	44329295	44330389
chr4	49803499	49803590	-	MIR	SINE	chr4	49802268	49804809
chr4	51847117	51847324	-	Bov-tA3	SINE	chr4	51846410	51847665
chr4	52184805	52184963	+	Bov-A2	SINE	chr4	52184469	52185368
chr4	56126231	56126462	-	MIR	SINE	chr4	56125188	56126750
chr4	56664765	56665196	+	LTR39_BT	LTR	chr4	56662596	56665987
chr4	56826981	56827051	+	Bov-A2	SINE	chr4	56822978	56828900
chr4	57034693	57034881	+	Bov-tA2	SINE	chr4	57034232	57036096
chr4	61202757	61203018	+	Bov-A2	SINE	chr4	61202325	61205297
chr4	65537677	65537882	-	Bov-A2	SINE	chr4	65536155	65541654
chr4	65971909	65972175	+	Bov-A2	SINE	chr4	65971298	65974137
chr4	66250999	66251126	-	Bov-A2	SINE	chr4	66251023	66251770
chr4	66530885	66531215	-	Bov-A2	SINE	chr4	66529679	66532995
chr4	68585739	68586168	+	L2c	LINE	chr4	68584924	68586369
chr4	69271904	69272043	-	Bov-A2	SINE	chr4	69271211	69273120
chr4	70578253	70578370	-	MER5A	DNA	chr4	70577208	70579013
chr4	70802664	70802805	+	Bov-tA2	SINE	chr4	70797146	70805990
chr4	75041067	75041431	-	L1MB1	LINE	chr4	75039793	75042409
chr4	79180317	79180536	+	Bov-tA1	SINE	chr4	79179407	79181404
chr4	79530890	79531305	+	MER31-int	LTR	chr4	79530419	79531918
chr4	79769848	79770243	-	MLT1A0	LTR	chr4	79768939	79770829
chr4	81062370	81062641	+	Bov-A2	SINE	chr4	81062269	81064077
chr4	91932115	91932359	-	Bov-A2	SINE	chr4	91931177	91933427
chr4	91945042	91945248	+	Bov-tA3	SINE	chr4	91943245	91946798
chr4	91958923	91959195	+	Bov-A2	SINE	chr4	91957748	91960999
chr4	93558709	93558776	+	Bov-tA3	SINE	chr4	93558192	93559347
chr4	94628407	94628905	-	MLT1D	LTR	chr4	94628084	94635226
chr4	95100997	95101192	+	Bov-tA2	SINE	chr4	95100913	95101794
chr4	96956369	96956635	+	Bov-A2	SINE	chr4	96955001	96957239
chr4	97258548	97258878	+	BovB	LINE	chr4	97258262	97259703
chr4	98494034	98494237	+	Bov-tA2	SINE	chr4	98493562	98495214
chr4	98498551	98498686	+	Bov-tA2	SINE	chr4	98496907	98500284
chr4	101371923	101372128	+	Bov-tA2	SINE	chr4	101371479	101372604
chr4	101573541	101573653	-	LTR16D	LTR	chr4	101572435	101574608
chr4	101743643	101743887	+	Bov-A2	SINE	chr4	101742663	101744037
chr4	101978093	101978143	+	L2a	LINE	chr4	101977689	101978816
chr4	103209172	103209315	-	Bov-A2	SINE	chr4	103206785	103211197
chr4	104060111	104060323	-	Bov-tA2	SINE	chr4	104059341	104062553
chr4	106615176	106615417	+	LTR32_BT	LTR	chr4	106613947	106616417
chr4	106948146	106949869	-	HAL1	LINE	chr4	106947778	106950320
chr4	107640350	107640477	+	7SK	RNA	chr4	107638196	107641202
chr4	110615916	110616091	+	Bov-tA2	SINE	chr4	110614798	110616667
chr4	111725070	111725238	-	MIRc	SINE	chr4	111724031	111727343
chr4	112277608	112277746	+	Bov-tA2	SINE	chr4	112277092	112278309
chr4	113680384	113680488	+	Bov-A2	SINE	chr4	113679467	113681569
chr4	113885500	113886256	+	ERV1-1-LTR_BT	LTR	chr4	113885500	113886994
chr4	119463868	119464069	-	Bov-tA2	SINE	chr4	119462587	119464509
chr4	119469325	119469574	+	Bov-A2	SINE	chr4	119468607	119470438
chr4	119480733	119481317	+	BovB	LINE	chr4	119480695	119481814
chr5	1349236	1349564	+	Bov-A2	SINE	chr5	1347530	1350193
chr5	5424786	5424964	+	Tigger13a	DNA	chr5	5423975	5426760
chr5	9434350	9434554	-	Bov-tA2	SINE	chr5	9433271	9435214
chr5	9597013	9597274	-	LTR40a	LTR	chr5	9595682	9603449
chr5	12366911	12367203	-	L3	LINE	chr5	12366198	12368455
chr5	18111786	18111907	+	MER21C	LTR	chr5	18109520	18113667
chr5	18111882	18112086	-	Bov-tA2	SINE	chr5	18109520	18113667
chr5	18290762	18291213	+	L1-2_BT	LINE	chr5	18290197	18291702
chr5	18427903	18428086	-	L1M5	LINE	chr5	18426706	18429011
chr5	18519791	18520037	-	L2c	LINE	chr5	18519171	18522324
chr5	18704992	18705132	-	L2c	LINE	chr5	18704420	18705202
chr5	19781448	19781524	-	Bov-A2	SINE	chr5	19780952	19782981
chr5	19872701	19872818	+	L2a	LINE	chr5	19871972	19874224
chr5	19887800	19888102	+	L2c	LINE	chr5	19885300	19892300
chr5	20246047	20246318	+	Bov-A2	SINE	chr5	20243765	20246562
chr5	22176882	22177067	-	MIRb	SINE	chr5	22175828	22178306
chr5	24392075	24392584	+	L1MC5a	LINE	chr5	24390178	24393345
chr5	24876340	24876448	+	MIR	SINE	chr5	24874161	24879330
chr5	25739372	25739569	+	Bov-tA2	SINE	chr5	25738828	25742019
chr5	26983172	26983442	+	Bov-A2	SINE	chr5	26981004	26985155
chr5	29330547	29330706	-	Bov-A2	SINE	chr5	29329020	29331862
chr5	29641529	29641664	+	Bov-A2	SINE	chr5	29641280	29642451
chr5	29654972	29655698	-	L1MB8	LINE	chr5	29654474	29655831
chr5	29779255	29779731	+	MER21B	LTR	chr5	29778463	29780470
chr5	31070892	31071228	-	CHR-2	SINE	chr5	31070525	31073437
chr5	31135818	31135969	-	Bov-A2	SINE	chr5	31135331	31135887
chr5	31135860	31136056	-	Bov-tA2	SINE	chr5	31135331	31135887
chr5	32212151	32212279	-	Bov-A2	SINE	chr5	32211272	32213505
chr5	33939450	33939509	-	Bov-A2	SINE	chr5	33938466	33940010
chr5	34942799	34943070	+	Bov-A2	SINE	chr5	34940251	34945682
chr5	35020884	35021086	+	Bov-tA2	SINE	chr5	35020063	35022019
chr5	38581248	38581517	+	Bov-A2	SINE	chr5	38580624	38581831
chr5	40693675	40693807	-	Bov-tA3	SINE	chr5	40692610	40695282
chr5	43234391	43234504	-	Bov-A2	SINE	chr5	43233847	43235913
chr5	43899723	43899930	-	Bov-tA2	SINE	chr5	43899490	43900320
chr5	44571893	44572166	+	Bov-A2	SINE	chr5	44571638	44572619
chr5	44803810	44803987	-	ERV54-EC_LTR	LTR	chr5	44803097	44804776
chr5	46182951	46183154	+	Bov-tA2	SINE	chr5	46179592	46184206
chr5	46186398	46186669	-	Bov-A2	SINE	chr5	46185913	46187121
chr5	46338222	46338492	+	Bov-A2	SINE	chr5	46337379	46339257
chr5	47059639	47060050	-	L3b	LINE	chr5	47059298	47059985
chr5	47850668	47850849	+	Bov-tA2	SINE	chr5	47850424	47851096
chr5	48480554	48480759	+	Bov-tA3	SINE	chr5	48479643	48481398
chr5	48480638	48480789	+	Bov-A2	SINE	chr5	48479643	48481398
chr5	49742260	49743169	+	L1MB8	LINE	chr5	49737799	49745874
chr5	51242684	51243061	-	L1MC	LINE	chr5	51242056	51244087
chr5	51257694	51257813	-	Bov-A2	SINE	chr5	51256934	51258287
chr5	54483686	54483838	+	MIR	SINE	chr5	54482722	54486586
chr5	54939149	54939255	+	MamRTE1	LINE	chr5	54937133	54947275
chr5	55450496	55451466	-	ERVL-E-int	LTR	chr5	55450346	55451614
chr5	55688156	55688528	-	L2a	LINE	chr5	55687097	55689028
chr5	55986182	55986447	-	Bov-A2	SINE	chr5	55984073	55987958
chr5	56189329	56189596	-	Bov-A2	SINE	chr5	56188834	56190302
chr5	57148572	57148684	+	Bov-tA2	SINE	chr5	57148445	57149272
chr5	57276506	57276761	+	Bov-A2	SINE	chr5	57276364	57279568
chr5	57525057	57525152	+	MIRb	SINE	chr5	57522359	57525846
chr5	60135627	60135829	+	Bov-tA2	SINE	chr5	60133738	60137313
chr5	60135709	60135845	+	Bov-A2	SINE	chr5	60133738	60137313
chr5	60143055	60143111	-	L3	LINE	chr5	60140162	60145875
chr5	60759923	60760295	-	MLT1A	LTR	chr5	60759253	60761228
chr5	62624773	62625038	-	Bov-A2	SINE	chr5	62624698	62625389
chr5	62818370	62818641	+	Bov-A2	SINE	chr5	62816838	62819667
chr5	64188746	64188869	-	Bov-A2	SINE	chr5	64188037	64189242
chr5	65240700	65240970	+	Bov-A2	SINE	chr5	65240128	65241385
chr5	65634771	65634976	-	MER3	DNA	chr5	65633970	65638945
chr5	65642392	65642577	-	Bov-tA2	SINE	chr5	65641878	65643225
chr5	67507650	67507770	-	Bov-A2	SINE	chr5	67507079	67509781
chr5	67777435	67777694	-	Bov-A2	SINE	chr5	67776799	67778179
chr5	67916888	67916937	-	Bov-A2	SINE	chr5	67915536	67917109
chr5	67916898	67917061	-	Bov-tA2	SINE	chr5	67915536	67917109
chr5	67962349	67962621	-	Bov-A2	SINE	chr5	67961958	67963147
chr5	68690497	68690563	-	Bov-A2	SINE	chr5	68689840	68692471
chr5	68869216	68869349	-	Bov-A2	SINE	chr5	68868396	68869928
chr5	68869230	68869426	-	Bov-tA3	SINE	chr5	68868396	68869928
chr5	69975420	69975520	+	Bov-tA2	SINE	chr5	69974741	69975740
chr5	70237655	70238102	+	L2a	LINE	chr5	70235668	70238934
chr5	70640249	70640425	+	MIRc	SINE	chr5	70638429	70642619
chr5	70767045	70767253	+	Bov-tA2	SINE	chr5	70766523	70767834
chr5	72338383	72338944	-	LTR1_BT	LTR	chr5	72338303	72339565
chr5	73933598	73933856	-	Bov-A2	SINE	chr5	73931332	73936234
chr5	73970275	73970398	+	SINE2-2_BT	SINE	chr5	73969783	73971623
chr5	74678443	74678555	+	MIRc	SINE	chr5	74677178	74678962
chr5	74816108	74816349	+	Bov-A2	SINE	chr5	74815817	74816927
chr5	77336881	77337090	+	Bov-tA2	SINE	chr5	77336895	77338111
chr5	77438919	77439581	+	LTR10B_BT	LTR	chr5	77438335	77441657
chr5	77564989	77565211	-	Bov-A2	SINE	chr5	77563988	77566430
chr5	78382545	78382730	+	Bov-tA2	SINE	chr5	78382006	78384218
chr5	79815331	79815824	-	LTR1_BT	LTR	chr5	79813056	79818847
chr5	79840425	79840695	+	Bov-A2	SINE	chr5	79839957	79841593
chr5	79958341	79958493	-	Bov-A2	SINE	chr5	79956891	79959755
chr5	80188567	80188779	+	Bov-tA2	SINE	chr5	80186303	80189859
chr5	81540999	81541231	-	Bov-A2	SINE	chr5	81540766	81541651
chr5	82133043	82133278	-	Bov-A2	SINE	chr5	82131757	82133839
chr5	83121727	83121929	+	Bov-tA2	SINE	chr5	83120719	83122396
chr5	83121809	83121953	+	Bov-A2	SINE	chr5	83120719	83122396
chr5	83343605	83343721	-	Bov-A2	SINE	chr5	83342748	83344754
chr5	83876685	83876867	-	Bov-tA3	SINE	chr5	83875558	83877366
chr5	84625578	84625816	-	LTR33A	LTR	chr5	84625357	84625960
chr5	84783643	84783893	+	Bov-A2	SINE	chr5	84783363	84784229
chr5	85089178	85089513	-	MER41_BT	LTR	chr5	85088702	85089546
chr5	92468495	92468768	+	Bov-A2	SINE	chr5	92467604	92469302
chr5	94219468	94219553	+	AmnSINE1	SINE	chr5	94215839	94221038
chr5	94348435	94348741	-	CHR-2A	SINE	chr5	94346605	94350634
chr5	94938979	94939251	-	Bov-A2	SINE	chr5	94938925	94940382
chr5	97318153	97318546	+	L1-2_BT	LINE	chr5	97312092	97319109
chr5	98053936	98055180	+	HAL1	LINE	chr5	98053108	98055959
chr5	98332033	98332537	+	L1ME1	LINE	chr5	98331826	98337149
chr5	100921290	100921359	-	CHR-2A	SINE	chr5	100920352	100922534
chr5	101534847	101534989	-	CHRL1_BT	SINE	chr5	101534440	101535466
chr5	103334054	103334168	-	Charlie15b	DNA	chr5	103333336	103335521
chr5	104013881	104014070	-	Bov-tA2	SINE	chr5	104013445	104014396
chr5	104050129	104050376	+	ERV1-1B-LTR_BT	LTR	chr5	104049635	104052525
chr5	104181089	104181460	+	ERV1-1C-LTR_BT	LTR	chr5	104179595	104183246
chr5	104188807	104189015	-	Bov-tA2	SINE	chr5	104184603	104189947
chr5	106005470	106005613	-	MIR1_Amn	SINE	chr5	106004628	106006765
chr5	106842339	106842607	-	BovB	LINE	chr5	106841169	106844525
chr5	107249996	107250137	+	HAL1ME	LINE	chr5	107248916	107250832
chr5	107621101	107621236	+	Bov-A2	SINE	chr5	107619352	107621900
chr5	107632951	107633223	-	Bov-A2	SINE	chr5	107629719	107634491
chr5	107820483	107820667	-	Bov-tA2	SINE	chr5	107820098	107820856
chr5	109404135	109404363	-	Bov-A2	SINE	chr5	109403815	109404677
chr5	110869398	110869441	+	BovB	LINE	chr5	110868265	110870428
chr5	111609218	111609487	-	Bov-A2	SINE	chr5	111608288	111610118
chr5	111891645	111891848	+	Bov-tA2	SINE	chr5	111891191	111892420
chr5	112218278	112218526	-	Bov-A2	SINE	chr5	112217454	112219755
chr5	112249496	112249660	+	MLT1J-int	LTR	chr5	112248304	112250497
chr5	112424959	112425086	+	L2b	LINE	chr5	112423580	112426984
chr5	113048708	113048960	+	Bov-A2	SINE	chr5	113047997	113050388
chr5	113682886	113683015	-	Bov-tA2	SINE	chr5	113682827	113683338
chr5	113684517	113684703	-	Bov-tA2	SINE	chr5	113684207	113685307
chr5	115417531	115417669	-	Bov-A2	SINE	chr5	115416476	115418000
chr5	119697827	119698029	+	Bov-tA3	SINE	chr5	119697434	119698780
chr5	119697909	119698050	+	Bov-A2	SINE	chr5	119697434	119698780
chr6	138671	139170	+	LTR10_EC	LTR	chr6	138448	140234
chr6	160264	161340	+	L1-3_BT	LINE	chr6	158858	162236
chr6	3549693	3549949	+	Bov-A2	SINE	chr6	3548480	3551101
chr6	5831145	5831805	+	BovB	LINE	chr6	5831105	5831968
chr6	11626982	11627253	-	Bov-A2	SINE	chr6	11625494	11628901
chr6	12035259	12035531	-	Bov-A2	SINE	chr6	12034613	12035802
chr6	13239667	13239880	+	MIRb	SINE	chr6	13238565	13241719
chr6	15783347	15783466	-	Bov-A2	SINE	chr6	15782046	15784933
chr6	16672055	16672314	-	Bov-A2	SINE	chr6	16671985	16673014
chr6	17151465	17151647	-	Bov-A2	SINE	chr6	17151024	17152083
chr6	19932294	19932510	+	Bov-tA2	SINE	chr6	19932035	19932987
chr6	22024970	22025242	-	Bov-A2	SINE	chr6	22023693	22025634
chr6	22108978	22109552	-	L1ME3A	LINE	chr6	22108509	22110280
chr6	22308311	22308429	-	Bov-A2	SINE	chr6	22307690	22310008
chr6	22356267	22356491	+	BovB	LINE	chr6	22355829	22360619
chr6	22453712	22453978	-	MER21C	LTR	chr6	22453258	22454468
chr6	22523335	22523471	-	Bov-A2	SINE	chr6	22521849	22525048
chr6	24004916	24005099	+	MamRTE1	LINE	chr6	24004114	24008980
chr6	25583894	25584158	-	Bov-A2	SINE	chr6	25582986	25585276
chr6	25684252	25684442	-	Bov-tA2	SINE	chr6	25683393	25685409
chr6	36506564	36506775	-	MLT1J	LTR	chr6	36506215	36507236
chr6	37720761	37721074	-	MLT1J	LTR	chr6	37720281	37721073
chr6	43136512	43136772	+	Bov-A2	SINE	chr6	43136400	43137565
chr6	45126384	45126499	-	MIRb	SINE	chr6	45125233	45127712
chr6	46303332	46303604	-	Bov-A2	SINE	chr6	46302892	46304132
chr6	47205753	47206006	-	Bov-A2	SINE	chr6	47205307	47205932
chr6	54646135	54646349	+	Bov-tA1	SINE	chr6	54645540	54647027
chr6	59637773	59637985	+	Bov-tA1	SINE	chr6	59637116	59638529
chr6	60076582	60076782	+	MIR	SINE	chr6	60075583	60078515
chr6	60193860	60194120	-	Bov-A2	SINE	chr6	60193249	60194937
chr6	60885555	60885647	-	L1ME3F	LINE	chr6	60881980	60887884
chr6	62534830	62535770	+	MER21C	LTR	chr6	62533720	62536450
chr6	65079958	65080180	-	Bov-A2	SINE	chr6	65078309	65081402
chr6	67859604	67860185	-	BTLTR1J	LTR	chr6	67859111	67861916
chr6	67883275	67884193	-	L2a	LINE	chr6	67882519	67883959
chr6	71651997	71652209	+	Bov-tA2	SINE	chr6	71651530	71652883
chr6	71750503	71750622	+	Bov-A2	SINE	chr6	71749786	71752164
chr6	76475784	76476208	+	LTR32_BT	LTR	chr6	76475367	76478160
chr6	85038719	85038922	+	Bov-tA3	SINE	chr6	85038352	85039417
chr6	86324906	86324972	-	Bov-tA3	SINE	chr6	86322833	86325431
chr6	86456952	86457315	-	MER41_BT	LTR	chr6	86456391	86458318
chr6	86875206	86875273	-	Bov-tA3	SINE	chr6	86872208	86876185
chr6	87064621	87064965	+	MLT1A0	LTR	chr6	87063791	87065836
chr6	88194105	88194300	-	Bov-tA2	SINE	chr6	88192009	88197488
chr6	95265467	95265663	+	Bov-tA2	SINE	chr6	95264962	95266524
chr6	95521533	95521651	+	MIR	SINE	chr6	95520209	95522261
chr6	95637483	95637677	+	Bov-tA3	SINE	chr6	95635446	95640064
chr6	97782705	97782977	+	Bov-A2	SINE	chr6	97782595	97784163
chr6	99745502	99745642	+	LTR67B	LTR	chr6	99744464	99746432
chr6	102142391	102142599	+	BovB	LINE	chr6	102140753	102143211
chr6	104361678	104361770	+	MLT1J2	LTR	chr6	104360711	104362001
chr6	106776415	106776541	-	MIRb	SINE	chr6	106775717	106781615
chr6	111227461	111227676	+	Bov-tA2	SINE	chr6	111225681	111228838
chr6	111251216	111251408	-	Bov-tA2	SINE	chr6	111250610	111252170
chr6	113605478	113605660	-	Bov-tA3	SINE	chr6	113605022	113605886
chr6	116206483	116206720	+	Bov-A2	SINE	chr6	116206233	116206789
chr7	4179773	4179954	-	Bov-tA2	SINE	chr7	4179325	4180683
chr7	4189050	4189106	-	Bov-A2	SINE	chr7	4188189	4189385
chr7	4189089	4189151	-	Bov-A2	SINE	chr7	4188189	4189385
chr7	4371624	4371893	+	ERVL-B4-int	LTR	chr7	4371151	4371930
chr7	5021596	5021737	+	CHRL	SINE	chr7	5020524	5022815
chr7	14740849	14741238	+	L1M5	LINE	chr7	14740543	14742002
chr7	15000001	15000327	+	BovB	LINE	chr7	14999737	15000619
chr7	15443656	15443736	+	MER5A	DNA	chr7	15442178	15445769
chr7	17960485	17960576	-	MLT1O	LTR	chr7	17958328	17962743
chr7	18100201	18100282	+	MLT1D	LTR	chr7	18099419	18101354
chr7	18134994	18135304	+	L3	LINE	chr7	18133932	18135936
chr7	20010652	20010867	-	L1M3	LINE	chr7	20008800	20014719
chr7	20010835	20011041	+	BovB	LINE	chr7	20008800	20014719
chr7	20488643	20488778	-	Bov-A2	SINE	chr7	20486902	20490306
chr7	20491560	20491825	+	Bov-A2	SINE	chr7	20490632	20492711
chr7	21994557	21995038	-	MLT1J	LTR	chr7	21994512	21996019
chr7	23187646	23187918	-	Bov-A2	SINE	chr7	23186130	23189225
chr7	25775741	25775927	-	Bov-tA2	SINE	chr7	25774947	25776813
chr7	25869762	25870043	-	LTR1_BT	LTR	chr7	25868146	25872195
chr7	26013946	26014203	-	Bov-A2	SINE	chr7	26011793	26016710
chr7	27416566	27416752	+	Bov-tA2	SINE	chr7	27415941	27417033
chr7	30920008	30921961	+	L1-3_BT	LINE	chr7	30919731	30923975
chr7	37091900	37092270	-	L2a	LINE	chr7	37090510	37093243
chr7	37850848	37851034	+	Bov-tA2	SINE	chr7	37849947	37852087
chr7	37947295	37948523	-	BovB	LINE	chr7	37945020	37947683
chr7	38395209	38395411	+	Bov-tA2	SINE	chr7	38394095	38397255
chr7	38439594	38439864	+	Bov-A2	SINE	chr7	38438906	38440577
chr7	40357745	40358016	-	Bov-A2	SINE	chr7	40357690	40358331
chr7	40391590	40391830	-	Bov-A2	SINE	chr7	40391155	40392181
chr7	42949521	42949737	-	Bov-tA3	SINE	chr7	42949435	42950550
chr7	43334543	43334681	+	Bov-A2	SINE	chr7	43333886	43335511
chr7	44128636	44129244	+	L1MC4a	LINE	chr7	44128072	44128972
chr7	44503122	44503242	-	L2d2	LINE	chr7	44501800	44505003
chr7	44612580	44612904	-	L2d	LINE	chr7	44612313	44613431
chr7	46007439	46007759	-	L2b	LINE	chr7	46006432	46008670
chr7	46239734	46239996	-	Bov-A2	SINE	chr7	46239099	46240412
chr7	46334448	46334560	+	Bov-A2	SINE	chr7	46333825	46335006
chr7	49080118	49080321	+	MIRb	SINE	chr7	49078339	49081281
chr7	50161787	50162060	-	Bov-A2	SINE	chr7	50160781	50163497
chr7	52638054	52638217	+	Bov-A2	SINE	chr7	52637953	52638614
chr7	53567836	53567979	+	Bov-A2	SINE	chr7	53567352	53569185
chr7	54206587	54206655	+	Bov-A2	SINE	chr7	54206062	54207063
chr7	56345208	56345413	-	Bov-A2	SINE	chr7	56344699	56345886
chr7	57378918	57379190	+	Bov-A2	SINE	chr7	57378434	57380002
chr7	60349892	60350061	-	hAT-N1_Mam	DNA	chr7	60345503	60362367
chr7	60377135	60377373	+	MIR	SINE	chr7	60374766	60379345
chr7	60885002	60885200	+	Bov-tA2	SINE	chr7	60884572	60886871
chr7	60885086	60885220	+	Bov-A2	SINE	chr7	60884572	60886871
chr7	61808818	61808867	-	MER94B	DNA	chr7	61808423	61810224
chr7	63579071	63579341	-	Bov-A2	SINE	chr7	63577526	63585509
chr7	65497163	65497624	-	MLT1F1	LTR	chr7	65496612	65501441
chr7	65975661	65975934	+	Bov-A2	SINE	chr7	65973498	65976361
chr7	68452982	68453225	+	L3	LINE	chr7	68450853	68454463
chr7	70933308	70933512	+	Bov-tA2	SINE	chr7	70932886	70934247
chr7	80581257	80582263	-	L1MC3	LINE	chr7	80580712	80581994
chr7	82365734	82365919	-	Bov-tA2	SINE	chr7	82364469	82367850
chr7	89672156	89672336	-	Bov-tA3	SINE	chr7	89671673	89672473
chr7	94878303	94878838	-	L1M3	LINE	chr7	94877424	94879015
chr7	96401520	96401791	+	Bov-A2	SINE	chr7	96400304	96405124
chr7	100549298	100549512	+	Bov-tA1	SINE	chr7	100545666	100551537
chr7	101737373	101737577	-	Bov-tA3	SINE	chr7	101736899	101737701
chr7	109817893	109818086	-	Bov-tA2	SINE	chr7	109817273	109818534
chr8	298254	298426	-	Bov-tA2	SINE	chr8	297456	299561
chr8	495028	495188	-	Bov-tA2	SINE	chr8	494069	501580
chr8	1572944	1573137	-	Bov-tA3	SINE	chr8	1571972	1573909
chr8	7880198	7880354	+	Bov-A2	SINE	chr8	7879679	7880939
chr8	10245455	10245727	+	Bov-A2	SINE	chr8	10244727	10246019
chr8	11087456	11087835	+	MamRep605b	LTR?	chr8	11087169	11087955
chr8	16870736	16870793	-	Bov-A2	SINE	chr8	16869797	16871162
chr8	16870754	16870990	-	Bov-tA2	SINE	chr8	16869797	16871162
chr8	16945262	16945429	-	MLT1F1	LTR	chr8	16943462	16947663
chr8	20428973	20429173	+	Bov-tA2	SINE	chr8	20427946	20430238
chr8	20751245	20751515	+	Bov-A2	SINE	chr8	20750985	20751634
chr8	22200073	22200345	+	Bov-A2	SINE	chr8	22197591	22204263
chr8	22248954	22249166	-	Bov-tA1	SINE	chr8	22247939	22255185
chr8	23867384	23867573	-	Bov-tA2	SINE	chr8	23866733	23868650
chr8	28070869	28071030	-	MER5A1	DNA	chr8	28070150	28073564
chr8	29513730	29513995	+	Bov-A2	SINE	chr8	29512440	29514563
chr8	39064202	39066061	+	L1MB3	LINE	chr8	39064308	39065711
chr8	39204476	39204589	+	L3	LINE	chr8	39203404	39206724
chr8	39217830	39217948	-	MIR1_Amn	SINE	chr8	39216370	39219108
chr8	39290715	39290851	-	BovB	LINE	chr8	39287996	39292532
chr8	40058360	40058631	-	Bov-A2	SINE	chr8	40057851	40058725
chr8	40582738	40582941	-	Bov-tA2	SINE	chr8	40581767	40583459
chr8	40688819	40688874	-	Bov-A2	SINE	chr8	40686795	40690057
chr8	44206337	44206551	-	MIRb	SINE	chr8	44205267	44208428
chr8	44222150	44222244	-	L2b	LINE	chr8	44217089	44224794
chr8	45262799	45262972	-	Bov-A2	SINE	chr8	45262030	45263242
chr8	47838539	47838809	-	Bov-A2	SINE	chr8	47838094	47840514
chr8	52969289	52969740	+	MLT1G1	LTR	chr8	52968927	52972291
chr8	53729904	53730129	+	L1MB3	LINE	chr8	53727523	53730083
chr8	53808241	53808944	-	BovB	LINE	chr8	53807085	53808791
chr8	57095113	57095971	+	ERVL-B4-int	LTR	chr8	57094315	57096497
chr8	57543825	57543946	+	Bov-A2	SINE	chr8	57543467	57544996
chr8	58019916	58020039	+	Bov-A2	SINE	chr8	58019766	58020610
chr8	63174766	63175040	-	Bov-A2	SINE	chr8	63174313	63175340
chr8	63279819	63280425	+	MER41_BT	LTR	chr8	63276349	63284538
chr8	64116214	64116426	-	Bov-A2	SINE	chr8	64115957	64117527
chr8	65295053	65295310	-	Bov-A2	SINE	chr8	65294542	65297528
chr8	66867703	66869937	+	Tigger1	DNA	chr8	66867618	66868273
chr8	67079036	67079305	-	Bov-A2	SINE	chr8	67078000	67081687
chr8	67343490	67343603	+	Bov-A2	SINE	chr8	67342579	67344178
chr8	69313497	69313767	+	Bov-A2	SINE	chr8	69312662	69314024
chr8	77869672	77869809	-	Bov-A2	SINE	chr8	77869667	77870097
chr8	81229132	81229220	+	MIR	SINE	chr8	81226097	81230231
chr8	81406875	81407080	-	Bov-tA2	SINE	chr8	81406417	81407255
chr8	83196307	83196362	+	BovB	LINE	chr8	83195292	83197535
chr8	83305053	83305105	+	Bov-tA2	SINE	chr8	83302977	83306234
chr8	83305090	83305238	-	Bov-A2	SINE	chr8	83302977	83306234
chr8	84843348	84844568	-	BovB	LINE	chr8	84841175	84845494
chr8	85298947	85299272	+	L2b	LINE	chr8	85297701	85301095
chr8	87360251	87360357	-	Bov-tA3	SINE	chr8	87358932	87361587
chr8	88635525	88635633	+	Bov-A2	SINE	chr8	88635162	88636832
chr8	96442172	96442309	-	Bov-A2	SINE	chr8	96441554	96443774
chr8	96635984	96636082	-	MIR3	SINE	chr8	96633843	96637506
chr8	96681041	96681313	-	Bov-A2	SINE	chr8	96680471	96681591
chr8	96970842	96971043	+	Bov-tA2	SINE	chr8	96968050	96972609
chr8	101383901	101384101	+	Bov-tA2	SINE	chr8	101383483	101385853
chr8	102613332	102613580	+	Bov-A2	SINE	chr8	102613168	102614155
chr8	102730759	102730798	-	MIRb	SINE	chr8	102729705	102731871
chr8	103109377	103109505	+	Bov-A2	SINE	chr8	103108769	103109652
chr8	112151801	112151986	-	Bov-tA2	SINE	chr8	112150225	112152663
chr8	112798295	112798486	+	Bov-tA1	SINE	chr8	112797211	112799435
chr9	8708127	8708363	+	L1ME3B	LINE	chr9	8707909	8709201
chr9	8722856	8723649	+	ERV1-1-I_BT	LTR	chr9	8721717	8724723
chr9	9416736	9416925	-	Bov-A2	SINE	chr9	9416411	9417645
chr9	9747780	9747926	-	Bov-A2	SINE	chr9	9747115	9748266
chr9	9821064	9821337	-	Bov-A2	SINE	chr9	9819963	9822049
chr9	10501037	10501310	-	Bov-A2	SINE	chr9	10500329	10502463
chr9	12197820	12198142	+	BovB	LINE	chr9	12195842	12199550
chr9	12201263	12201458	-	Bov-tA3	SINE	chr9	12201122	12202050
chr9	12629940	12630015	+	SINE2-1_BT	SINE	chr9	12628472	12630176
chr9	17977498	17978049	+	LTR1_BT	LTR	chr9	17975979	17980160
chr9	18835443	18836740	-	BTLTR1B	LTR	chr9	18834954	18839384
chr9	19266028	19266234	+	Bov-A2	SINE	chr9	19265204	19266604
chr9	22060366	22060625	-	Bov-A2	SINE	chr9	22058561	22061090
chr9	22104344	22104605	+	LTR72_BT	LTR	chr9	22103017	22105212
chr9	26644670	26644933	-	MamRep605b	LTR?	chr9	26643941	26645817
chr9	29223519	29223791	+	L1M5	LINE	chr9	29223218	29224560
chr9	33217607	33218020	-	L2	LINE	chr9	33217423	33219460
chr9	34434811	34435071	-	Bov-A2	SINE	chr9	34433151	34435729
chr9	34962193	34962378	-	Bov-tA2	SINE	chr9	34961940	34962869
chr9	38087004	38087262	+	Bov-A2	SINE	chr9	38086552	38087839
chr9	38834440	38834711	+	Bov-A2	SINE	chr9	38834000	38835156
chr9	39098418	39098540	+	Bov-tA3	SINE	chr9	39097609	39099194
chr9	39239676	39239716	+	Bov-A2	SINE	chr9	39237759	39245285
chr9	40830537	40830806	-	Bov-A2	SINE	chr9	40830200	40831723
chr9	40834290	40834587	-	MER58B	DNA	chr9	40832261	40836429
chr9	41788134	41788249	-	Bov-A2	SINE	chr9	41787374	41789059
chr9	42498981	42499177	-	Bov-tA2	SINE	chr9	42498500	42499952
chr9	45145714	45146905	-	BovB	LINE	chr9	45145307	45150696
chr9	48339212	48340264	+	L1-3_BT	LINE	chr9	48338627	48340794
chr9	49386575	49386847	-	Bov-A2	SINE	chr9	49385323	49387784
chr9	54845147	54845529	-	MLT1I	LTR	chr9	54844799	54847438
chr9	61023152	61023757	+	BovB	LINE	chr9	61023176	61024952
chr9	61046176	61046496	+	ERV54-EC_LTR	LTR	chr9	61044607	61046986
chr9	63724854	63725287	-	L1-3_BT	LINE	chr9	63724413	63725748
chr9	63741910	63742081	+	Bov-tA2	SINE	chr9	63740185	63742854
chr9	64095565	64095727	-	Bov-tA2	SINE	chr9	64094725	64098598
chr9	65965234	65965485	-	Bov-A2	SINE	chr9	65964225	65966339
chr9	66535915	66536185	+	Bov-A2	SINE	chr9	66534069	66536862
chr9	66600071	66600163	+	Bov-tA2	SINE	chr9	66598617	66601801
chr9	69042261	69042424	-	Bov-A2	SINE	chr9	69037484	69044346
chr9	69042283	69042511	-	Bov-tA3	SINE	chr9	69037484	69044346
chr9	72397733	72398012	+	Bov-A2	SINE	chr9	72397262	72398499
chr9	74486295	74486567	-	Bov-A2	SINE	chr9	74485871	74487251
chr9	85832355	85832538	-	Bov-tA2	SINE	chr9	85831863	85832672
chr9	87872239	87872435	-	L1MB3	LINE	chr9	87871327	87873496
chr9	90007596	90007666	+	Bov-tA2	SINE	chr9	90005635	90011927
chr9	90934020	90934293	-	Bov-A2	SINE	chr9	90933370	90934654
chr9	93450094	93450366	-	Bov-A2	SINE	chr9	93447610	93452070
chr9	94131171	94131797	-	BovB	LINE	chr9	94130704	94131620
chr9	94282564	94282679	+	Bov-A2	SINE	chr9	94282234	94283369
chr9	95343451	95343634	-	Bov-tA2	SINE	chr9	95342828	95343924
chr9	97733699	97733869	+	MIRb	SINE	chr9	97732483	97734983
chr9	98871305	98871658	-	L2	LINE	chr9	98870615	98871498
chr9	101489120	101489417	+	L2	LINE	chr9	101487322	101490099
chr9	103399913	103400476	+	ERV1-1B-LTR_BT	LTR	chr9	103399230	103400625
chrX	8453445	8453642	+	Bov-tA2	SINE	chrX	8452253	8454133
chrX	8453522	8453657	+	Bov-A2	SINE	chrX	8452253	8454133
chrX	15922131	15922320	+	Bov-tA2	SINE	chrX	15920371	15923029
chrX	16267280	16267354	-	MIRb	SINE	chrX	16265970	16268089
chrX	18193825	18194073	-	Bov-A2	SINE	chrX	18191341	18194357
chrX	30330492	30330911	-	L2	LINE	chrX	30329045	30332246
chrX	30404603	30404802	-	Bov-tA2	SINE	chrX	30404619	30405412
chrX	30445070	30445355	-	L2a	LINE	chrX	30444150	30447090
chrX	37016518	37016659	-	Bov-A2	SINE	chrX	37014171	37018466
chrX	46455561	46455704	+	MamTip2	DNA	chrX	46453917	46456274
chrX	51424253	51424454	+	Bov-tA3	SINE	chrX	51421404	51426656
chrX	51424334	51424476	+	Bov-A2	SINE	chrX	51421404	51426656
chrX	52828303	52828781	-	MLT1H1	LTR	chrX	52828416	52829093
chrX	56326738	56327298	-	BovB	LINE	chrX	56326906	56327356
chrX	60509253	60509936	-	LTR1_BT	LTR	chrX	60508000	60511642
chrX	77024245	77024366	+	L1-3_BT	LINE	chrX	77024329	77025433
chrX	82597690	82598118	-	L4_A_Mam	LINE	chrX	82595910	82598648
chrX	84199523	84199686	-	MIRb	SINE	chrX	84198807	84200170
chrX	88563770	88564074	+	Plat_L3	LINE	chrX	88562136	88565479
chrX	102179586	102179786	-	Bov-tA2	SINE	chrX	102177963	102180471
chrX	110686675	110687518	-	Tigger10	DNA	chrX	110687160	110688012
chrX	120276860	120276926	-	Bov-tA3	SINE	chrX	120276353	120278075
chrX	133554846	133555094	+	Bov-A2	SINE	chrX	133551352	133555691
chrX	138905318	138905589	-	Bov-A2	SINE	chrX	138905009	138906706

## Sheet: IFNG-downregulated H3K27ac TEs
Chromosome	Start	End	Strand	Family	Class	Peak chromosome	Peak start	Peak end
chr1	968206	968257	-	UCON97	DNA	chr1	965206	969343
chr1	19515469	19515673	+	Bov-tA2	SINE	chr1	19514697	19517208
chr1	44043900	44044004	+	L2c	LINE	chr1	44042773	44048112
chr1	44298569	44298785	+	LFSINE_Vert	SINE	chr1	44296583	44300061
chr1	58556928	58557079	+	MER5A	DNA	chr1	58553671	58559118
chr1	65483427	65483643	-	MamRep605b	LTR?	chr1	65482654	65484889
chr1	73708155	73708418	-	L2b	LINE	chr1	73706261	73710272
chr1	73753391	73754028	+	LTR39B_BT	LTR	chr1	73752674	73755560
chr1	93910508	93910908	-	LFSINE_Vert	SINE	chr1	93907666	93912390
chr1	106098716	106098914	+	Bov-tA2	SINE	chr1	106097534	106099596
chr1	117390712	117391152	+	LTR40c	LTR	chr1	117389958	117391960
chr1	119950163	119950227	+	ERV1-2C-LTR_BT	LTR	chr1	119948804	119951971
chr1	121906905	121908014	-	BTLTR1F	LTR	chr1	121906759	121907909
chr1	122015526	122015737	-	Bov-tA1	SINE	chr1	122014933	122016079
chr1	133227144	133228445	-	L1MB2	LINE	chr1	133225555	133228428
chr1	145159718	145159958	+	MER67C	LTR	chr1	145158860	145161233
chr1	146937000	146937167	-	BovB	LINE	chr1	146936243	146938278
chr1	153532937	153533108	+	MER5A	DNA	chr1	153532378	153534228
chr10	1961745	1961919	-	MamRep605b	LTR?	chr10	1960366	1962733
chr10	2575298	2576577	+	BTLTR1B	LTR	chr10	2575421	2575904
chr10	15489713	15489898	+	MIRc	SINE	chr10	15487758	15492614
chr10	15818703	15820009	-	BTLTR1B	LTR	chr10	15818904	15820185
chr10	15827109	15827850	+	BTLTR1F	LTR	chr10	15827031	15828774
chr10	17567287	17567350	+	MIR	SINE	chr10	17565330	17569802
chr10	18199642	18199737	+	ERV1-3-LTR_BT	LTR	chr10	18198321	18201033
chr10	18199733	18199812	-	Bov-A2	SINE	chr10	18198321	18201033
chr10	22001180	22001684	-	L2	LINE	chr10	21999656	22002514
chr10	25099608	25099802	+	L1MA9	LINE	chr10	25098099	25101034
chr10	25109088	25110396	+	BTLTR1F	LTR	chr10	25109068	25110323
chr10	25192668	25193105	-	MLT1F	LTR	chr10	25191990	25192997
chr10	28481711	28481909	-	Bov-tA2	SINE	chr10	28475397	28483920
chr10	30955890	30956317	+	L1M4a2	LINE	chr10	30955155	30957265
chr10	38877999	38878201	-	Bov-tA2	SINE	chr10	38877257	38878832
chr10	51837391	51837584	+	MLT1K	LTR	chr10	51836230	51838170
chr10	53459545	53460247	+	Tigger6a	DNA	chr10	53459282	53459980
chr10	57813566	57813773	-	Bov-tA2	SINE	chr10	57813080	57814219
chr10	60473974	60474104	+	L2c	LINE	chr10	60473313	60475500
chr10	82141469	82142778	-	BTLTR1B	LTR	chr10	82141127	82142922
chr10	82730158	82730919	+	MER21C	LTR	chr10	82727808	82732090
chr11	289738	289835	-	MIR	SINE	chr11	289179	290831
chr11	466492	467353	+	HAL1	LINE	chr11	466476	468496
chr11	7128548	7128623	+	Bov-tA2	SINE	chr11	7126264	7134209
chr11	10040127	10040306	-	Bov-tA2	SINE	chr11	10039867	10040777
chr11	19408253	19408390	-	L2c	LINE	chr11	19405571	19409953
chr11	23975443	23975645	-	Bov-tA2	SINE	chr11	23972263	23976230
chr11	26689574	26689740	+	CHRL	SINE	chr11	26688366	26690441
chr11	26716661	26716906	+	BovB	LINE	chr11	26715474	26717919
chr11	46425497	46425573	+	MER5B	DNA	chr11	46424758	46427484
chr11	62548433	62548992	+	BovB	LINE	chr11	62546010	62551567
chr11	68710631	68710828	-	Bov-tA2	SINE	chr11	68708790	68713166
chr11	78388262	78388398	-	L2a	LINE	chr11	78386812	78388889
chr11	83037940	83038066	+	Bov-tA3	SINE	chr11	83037036	83039109
chr12	15319319	15319537	-	Bov-tA1	SINE	chr12	15316880	15320378
chr12	18084826	18085708	-	L1-3_BT	LINE	chr12	18084437	18086708
chr12	19826659	19827954	+	BTLTR1B	LTR	chr12	19825909	19828445
chr12	26141173	26141338	+	BovB	LINE	chr12	26139714	26142084
chr12	37414291	37414906	-	BovB	LINE	chr12	37413981	37415093
chr12	37419285	37419379	-	ERV1-1B-LTR_BT	LTR	chr12	37418120	37422551
chr12	48831735	48832769	-	L1-3_BT	LINE	chr12	48831309	48832968
chr12	56418477	56419492	+	ERVL-E-int	LTR	chr12	56418691	56419506
chr12	85216192	85216525	+	ERV54-EC_LTR	LTR	chr12	85214286	85218424
chr12	87014064	87014276	-	Bov-tA2	SINE	chr12	87012787	87015833
chr13	4543926	4544382	-	MLT1H	LTR	chr13	4541251	4545688
chr13	16082529	16083073	+	BovB	LINE	chr13	16082375	16084483
chr13	19556753	19556964	-	Bov-tA2	SINE	chr13	19555833	19557820
chr13	32169036	32170315	+	BTLTR1B	LTR	chr13	32167343	32171506
chr13	33179391	33179546	-	MLT1I	LTR	chr13	33176090	33180354
chr13	34349306	34349588	-	MLT1K	LTR	chr13	34348545	34350936
chr13	43941812	43942029	+	BovB	LINE	chr13	43941081	43944421
chr13	43966233	43966414	-	Bov-tA2	SINE	chr13	43963350	43970971
chr13	60296860	60296959	-	MIRb	SINE	chr13	60291777	60298909
chr13	61555935	61556058	-	MIR	SINE	chr13	61550747	61556925
chr13	68297666	68298607	-	BovB	LINE	chr13	68297179	68298087
chr13	68397534	68398845	-	BTLTR1B	LTR	chr13	68396350	68399336
chr13	73521282	73522559	-	BTLTR1B	LTR	chr13	73521139	73522845
chr13	74800253	74800457	+	MER63A	DNA	chr13	74799371	74802948
chr13	78071572	78072079	-	L2a	LINE	chr13	78068751	78077997
chr13	81522046	81523330	+	BTLTR1B	LTR	chr13	81521717	81523335
chr14	906143	906587	-	LTR13B_BT	LTR	chr14	904851	908025
chr14	927830	927973	-	MLT1C2	LTR	chr14	927298	929190
chr14	8027538	8027767	-	MIR	SINE	chr14	8024624	8029216
chr14	10056140	10056452	+	L2b	LINE	chr14	10055329	10057549
chr14	15909197	15910496	-	BTLTR1B	LTR	chr14	15909300	15910784
chr14	20713444	20713674	+	L1MD2	LINE	chr14	20712378	20714910
chr14	21136460	21136730	+	BovB	LINE	chr14	21135899	21137586
chr14	21857277	21858571	+	BTLTR1B	LTR	chr14	21855181	21858863
chr14	22007425	22007595	-	Bov-tA2	SINE	chr14	22005821	22012042
chr14	36360711	36361072	+	ERV54-EC_LTR	LTR	chr14	36359432	36362482
chr14	49188498	49188991	+	MLT1G	LTR	chr14	49188411	49190205
chr14	66535141	66535558	-	BovB	LINE	chr14	66532813	66538605
chr14	73365903	73366327	-	LTR11_BT	LTR	chr14	73363921	73367455
chr14	73578289	73579558	+	BTLTR1B	LTR	chr14	73576482	73581607
chr14	73676816	73678119	-	BTLTR1B	LTR	chr14	73676389	73679197
chr14	73721663	73722365	-	L2a	LINE	chr14	73720939	73724179
chr14	74301367	74301571	+	Bov-tA1	SINE	chr14	74300494	74302024
chr14	76573086	76573291	-	CHR-2	SINE	chr14	76571997	76576768
chr14	80728001	80729277	-	BTLTR1B	LTR	chr14	80727922	80730325
chr14	81658281	81658510	+	MLT1J	LTR	chr14	81654551	81660338
chr14	81790273	81791583	-	BTLTR1B	LTR	chr14	81789530	81791841
chr15	6236244	6236676	-	BovB	LINE	chr15	6234633	6237419
chr15	10045195	10046496	+	BTLTR1B	LTR	chr15	10043158	10047755
chr15	34169148	34169356	+	Bov-tA2	SINE	chr15	34168298	34171291
chr15	35564266	35564476	-	Bov-tA1	SINE	chr15	35562406	35565933
chr15	35568297	35569595	+	BovB	LINE	chr15	35568116	35572946
chr15	38653338	38653732	+	L2d2	LINE	chr15	38652033	38656098
chr15	39775175	39775481	+	L2c	LINE	chr15	39774703	39778440
chr15	40415960	40416145	-	Bov-tA2	SINE	chr15	40415336	40416205
chr15	43389830	43390020	+	L3	LINE	chr15	43388316	43392262
chr15	43779228	43779600	+	L2d2	LINE	chr15	43777155	43781149
chr15	44396463	44396594	+	L3	LINE	chr15	44394003	44399096
chr15	51271505	51271624	+	Bov-tA2	SINE	chr15	51269246	51273602
chr15	52106143	52106427	-	LTR16E2	LTR	chr15	52105081	52107588
chr15	76649724	76649864	-	MIRb	SINE	chr15	76647802	76651833
chr15	81064048	81065332	-	BTLTR1B	LTR	chr15	81063774	81066418
chr15	81195267	81195568	-	MLT1G1	LTR	chr15	81193679	81197002
chr16	21949740	21950020	+	CHR-2A	SINE	chr16	21945024	21950631
chr16	29145500	29145734	+	CHR-2_BT	SINE	chr16	29141485	29148112
chr16	29467987	29469206	+	ERV2-1C-LTR_BT	LTR	chr16	29467667	29469353
chr16	32600845	32601336	-	ERV1-1B-LTR_BT	LTR	chr16	32600030	32602983
chr16	32835966	32836030	-	L2b	LINE	chr16	32835241	32837605
chr16	36534564	36534749	-	MIRb	SINE	chr16	36532330	36535305
chr16	37626579	37626790	-	Bov-tA2	SINE	chr16	37623876	37627910
chr16	44000764	44001218	-	L2c	LINE	chr16	44000601	44002654
chr16	47288520	47288746	+	Bov-tA1	SINE	chr16	47288217	47294287
chr16	53611394	53611798	+	MLT1J2	LTR	chr16	53610514	53612646
chr16	61847317	61847633	+	BovB	LINE	chr16	61845922	61850216
chr16	63912293	63912495	-	Bov-tA2	SINE	chr16	63909328	63913153
chr16	64532757	64532969	+	Bov-tA2	SINE	chr16	64531263	64534783
chr16	66492809	66493294	-	MLT1N2	LTR	chr16	66491989	66494596
chr17	177756	178770	-	LTR11B_BT	LTR	chr17	177202	179417
chr17	29250540	29250960	+	L2c	LINE	chr17	29248424	29253099
chr17	29263339	29263802	+	LTR81	LTR	chr17	29259975	29265995
chr17	38797232	38797613	-	MLT1I	LTR	chr17	38796550	38799725
chr17	51558709	51558853	+	MER63A	DNA	chr17	51557757	51559626
chr17	61054023	61055332	+	BTLTR1B	LTR	chr17	61053253	61057390
chr17	64182221	64182418	-	Bov-tA2	SINE	chr17	64182247	64183050
chr18	2896573	2897063	+	MLT1F	LTR	chr18	2891990	2898556
chr18	8116132	8116579	+	L2a	LINE	chr18	8113985	8117617
chr18	11452155	11452390	-	MIR	SINE	chr18	11450106	11454122
chr18	12535615	12535750	+	MIRb	SINE	chr18	12535085	12538630
chr18	25036763	25037160	+	LTR16A1	LTR	chr18	25035916	25038662
chr18	28492427	28492639	-	Bov-tA2	SINE	chr18	28491234	28494025
chr18	37929520	37929712	+	Bov-tA2	SINE	chr18	37927561	37931026
chr18	46069894	46071213	+	BTLTR1B	LTR	chr18	46069770	46071499
chr18	53110958	53111178	-	MIRb	SINE	chr18	53103450	53115833
chr18	54529557	54530011	-	MLT1H	LTR	chr18	54529010	54532653
chr18	65191692	65192944	+	BTLTR1B	LTR	chr18	65191426	65193353
chr19	17374928	17375129	-	Bov-tA2	SINE	chr19	17366923	17378674
chr19	22200010	22201420	-	L1MC4	LINE	chr19	22196591	22201506
chr19	22218707	22218867	+	MIRb	SINE	chr19	22217290	22221298
chr19	24930629	24931910	-	BTLTR1B	LTR	chr19	24930423	24932447
chr19	30716840	30717349	+	MLT1F1	LTR	chr19	30716164	30718432
chr19	37338750	37338964	-	Bov-tA2	SINE	chr19	37338487	37339892
chr19	62649783	62649994	-	Bov-tA2	SINE	chr19	62648099	62651140
chr2	21868570	21869149	+	LTR39_BT	LTR	chr2	21865925	21869633
chr2	33438397	33439668	+	BTLTR1B	LTR	chr2	33438455	33439371
chr2	36184203	36185501	-	BTLTR1B	LTR	chr2	36182505	36187437
chr2	37357149	37358394	+	BTLTR1B	LTR	chr2	37356590	37362231
chr2	37378202	37378309	+	MLT1H	LTR	chr2	37376057	37381233
chr2	39250547	39250657	-	BovB	LINE	chr2	39248838	39255007
chr2	45993198	45993459	+	Chap1_Mam	DNA	chr2	45992717	45994049
chr2	58964428	58964755	-	LTR16B2	LTR	chr2	58962470	58967294
chr2	68657635	68658915	+	BTLTR1B	LTR	chr2	68655951	68659269
chr2	71584270	71584493	-	Bov-A2	SINE	chr2	71582726	71584510
chr2	79930666	79930804	-	MamRTE1	LINE	chr2	79921014	79931940
chr2	100837617	100838751	+	L2a	LINE	chr2	100836142	100838701
chr2	104554463	104555138	+	MER45B	DNA	chr2	104552802	104556625
chr2	120355010	120355271	-	MIRb	SINE	chr2	120354072	120356789
chr2	123469903	123471189	-	BTLTR1B	LTR	chr2	123469408	123472286
chr2	124680438	124680954	+	MLT1H	LTR	chr2	124679587	124681607
chr2	130324438	130324912	+	MLT1F2	LTR	chr2	130323693	130324985
chr2	133649642	133649954	-	L2c	LINE	chr2	133648186	133650367
chr20	3239082	3239287	-	Bov-tA2	SINE	chr20	3239081	3239698
chr20	3250569	3250783	-	L2b	LINE	chr20	3249757	3252429
chr20	13489142	13489325	-	Bov-tA2	SINE	chr20	13486580	13493027
chr20	13621713	13621903	-	Bov-tA1	SINE	chr20	13617797	13625964
chr20	18511371	18511669	+	BovB	LINE	chr20	18508426	18512778
chr20	21452157	21452237	-	L2-2_Mam	LINE	chr20	21448748	21453721
chr20	21825136	21826418	+	BTLTR1B	LTR	chr20	21825107	21826250
chr20	25407712	25408252	+	Tigger17a	DNA	chr20	25406998	25409389
chr20	36749018	36749301	+	X24_LINE	LINE	chr20	36747957	36751487
chr20	62917654	62918094	+	MER89	LTR	chr20	62916918	62919375
chr20	67725221	67725583	+	L1MC1	LINE	chr20	67723507	67726441
chr20	67733690	67734076	+	ALTR2B1_BT	LTR	chr20	67732746	67735312
chr20	67946622	67947460	-	BovB	LINE	chr20	67944615	67950170
chr20	67958292	67958702	+	L1MB7	LINE	chr20	67956847	67961329
chr21	2736095	2736634	-	L1-3_BT	LINE	chr21	2735321	2737120
chr21	2740274	2740364	+	MER63D	DNA	chr21	2738233	2743052
chr21	5805558	5806836	+	BTLTR1B	LTR	chr21	5805024	5807092
chr21	22250310	22250617	+	MLT1K	LTR	chr21	22248995	22252149
chr21	26214433	26214678	-	LTR13B_BT	LTR	chr21	26213237	26216277
chr21	30511484	30511574	+	Bov-A2	SINE	chr21	30508722	30512584
chr21	32419023	32419154	+	L1MC5a	LINE	chr21	32417062	32421184
chr21	33796909	33797044	-	MER58A	DNA	chr21	33794424	33799177
chr21	34147987	34148389	-	BovB	LINE	chr21	34147755	34149213
chr21	47715542	47716066	-	L2	LINE	chr21	47713422	47719714
chr21	64633484	64633653	+	MIRc	SINE	chr21	64628847	64638902
chr21	67267016	67267262	-	MLT1H2	LTR	chr21	67262033	67268443
chr22	300165	301198	-	L1_BT	LINE	chr22	298297	301536
chr22	10786471	10786678	-	MLT1E3	LTR	chr22	10784850	10789121
chr22	12559413	12559611	-	Bov-tA2	SINE	chr22	12557759	12560393
chr22	17679401	17681551	+	L1_BT	LINE	chr22	17677819	17680867
chr22	17823819	17824082	-	Tigger15a	DNA	chr22	17820955	17825546
chr22	19621488	19621618	+	Bov-A2	SINE	chr22	19620442	19623216
chr22	37427344	37427848	-	L1-2_BT	LINE	chr22	37426599	37429443
chr22	37588679	37589183	+	LTR33	LTR	chr22	37587613	37592593
chr22	42808167	42808287	+	MLT1M	LTR	chr22	42806590	42809946
chr22	51449044	51449220	-	Tigger12	DNA	chr22	51447587	51450245
chr22	53712805	53713100	-	L1ME4b	LINE	chr22	53711129	53714607
chr22	57561854	57562170	+	L2c	LINE	chr22	57560270	57563307
chr23	3155644	3156947	+	BovB	LINE	chr23	3154562	3157100
chr23	3271893	3272218	-	MLT1H	LTR	chr23	3269883	3273345
chr23	9352781	9352906	-	MIR3	SINE	chr23	9351932	9353633
chr23	16420195	16420724	-	MLT1F	LTR	chr23	16419765	16421032
chr23	16741809	16741939	+	MIR3	SINE	chr23	16740323	16742516
chr23	17185601	17185828	-	MIRb	SINE	chr23	17185073	17187499
chr23	17512601	17512843	-	LTR16E2	LTR	chr23	17511870	17513205
chr23	17647282	17647562	+	L2c	LINE	chr23	17646343	17649892
chr23	25147574	25147738	-	L1M4	LINE	chr23	25146016	25148720
chr23	27879452	27879705	+	ALTR2C_BT	LTR	chr23	27878367	27880265
chr23	30019009	30019307	-	7SLRNA	srpRNA	chr23	30018954	30019466
chr23	32843743	32843979	-	MIR	SINE	chr23	32842757	32845662
chr23	45029195	45029373	-	MER5B	DNA	chr23	45027562	45034797
chr24	20031935	20032231	+	L1M4a2	LINE	chr24	20030928	20033545
chr24	28210751	28210864	-	Bov-tA2	SINE	chr24	28208186	28212673
chr24	41011504	41011721	-	Bov-tA1	SINE	chr24	41010796	41014644
chr24	41066897	41067136	+	LTR101_Mam	LTR	chr24	41066144	41069470
chr24	43034459	43034630	+	MER117	DNA	chr24	43030960	43036210
chr24	46119786	46120121	-	MLT1H	LTR	chr24	46118526	46121319
chr24	61529116	61529333	+	Bov-tA1	SINE	chr24	61528384	61529974
chr25	8885947	8886153	-	Bov-tA2	SINE	chr25	8883924	8887563
chr25	13037223	13038522	-	BTLTR1B	LTR	chr25	13036580	13039132
chr25	15295130	15296429	-	BTLTR1B	LTR	chr25	15295225	15296927
chr25	15320615	15320823	-	MER20	DNA	chr25	15319710	15321519
chr25	15690577	15690709	+	MIR3	SINE	chr25	15688768	15691911
chr25	22049503	22050193	+	BovB	LINE	chr25	22049293	22052053
chr25	22148153	22149212	-	L1-3_BT	LINE	chr25	22147474	22155077
chr25	22357410	22357670	+	L3	LINE	chr25	22356276	22358695
chr25	23293936	23294286	+	BovB	LINE	chr25	23293635	23298934
chr25	27043847	27044133	+	CHR-2	SINE	chr25	27042489	27044946
chr25	31941387	31941606	+	MLT1I	LTR	chr25	31939018	31942370
chr25	33102162	33102290	-	MER94	DNA	chr25	33101518	33104314
chr25	37222763	37222920	+	Bov-tA2	SINE	chr25	37216687	37227309
chr25	37475947	37476165	-	MLT1F1	LTR	chr25	37474284	37477827
chr26	21065280	21066588	+	BTLTR1B	LTR	chr26	21064579	21066874
chr26	24156679	24156833	-	L2d2	LINE	chr26	24155188	24157577
chr26	33440486	33440577	+	MER5A	DNA	chr26	33439738	33441793
chr26	33440498	33440601	-	MER5B	DNA	chr26	33439738	33441793
chr27	25056765	25057351	+	L1MEh	LINE	chr27	25056043	25058318
chr27	25154260	25155556	-	BTLTR1B	LTR	chr27	25154184	25156080
chr27	26502383	26502485	-	MIRb	SINE	chr27	26494412	26506168
chr27	26738960	26739085	+	BovB	LINE	chr27	26735657	26741710
chr27	33659322	33659373	-	BovB	LINE	chr27	33658303	33661324
chr28	4739447	4739638	-	L2b	LINE	chr28	4738800	4741185
chr28	13789566	13789712	-	MIRb	SINE	chr28	13789092	13790671
chr28	23573869	23574058	+	Bov-tA3	SINE	chr28	23572264	23576057
chr28	24700024	24700291	-	CHR-2A	SINE	chr28	24699834	24700973
chr28	24737909	24738063	-	MER5B	DNA	chr28	24736838	24739219
chr28	26810170	26810801	-	LTR39_BT	LTR	chr28	26809442	26812856
chr28	28005229	28005791	-	BovB	LINE	chr28	28003822	28005855
chr28	37305156	37305356	-	BovB	LINE	chr28	37304997	37306175
chr29	8463963	8464302	+	L1MC1	LINE	chr29	8460688	8467971
chr29	9513769	9514020	-	MLT1J2	LTR	chr29	9513345	9514517
chr29	10008508	10008872	-	L2b	LINE	chr29	10007479	10012281
chr29	17389532	17390186	-	ERV1-1C-LTR_BT	LTR	chr29	17389038	17391268
chr29	24822502	24822721	+	Bov-tA1	SINE	chr29	24821650	24824225
chr29	26080592	26080707	-	L2b	LINE	chr29	26079216	26081587
chr29	36701568	36701696	-	MIR3	SINE	chr29	36700869	36704886
chr29	41170140	41171108	-	BTLTR1B	LTR	chr29	41167902	41171925
chr29	42027110	42027290	+	Bov-tA2	SINE	chr29	42026460	42030978
chr3	1129760	1131036	-	BTLTR1B	LTR	chr3	1129438	1131502
chr3	8448130	8448323	+	MIRb	SINE	chr3	8444859	8449096
chr3	22140368	22140576	+	Bov-tA2	SINE	chr3	22138248	22141752
chr3	23738968	23739178	-	Bov-tA1	SINE	chr3	23737341	23740692
chr3	33258097	33258441	-	Tigger15a	DNA	chr3	33257215	33260673
chr3	34785018	34785085	+	Bov-tA3	SINE	chr3	34784155	34787009
chr3	35268036	35269334	+	BTLTR1B	LTR	chr3	35266826	35270135
chr3	49854981	49855140	+	BovB	LINE	chr3	49846272	49858294
chr3	53018081	53018289	-	Bov-tA2	SINE	chr3	53016624	53022512
chr3	70096357	70096559	+	Bov-tA2	SINE	chr3	70094749	70098433
chr3	70189255	70190527	-	BTLTR1B	LTR	chr3	70189166	70191150
chr3	70199747	70199980	+	BovB	LINE	chr3	70198372	70200392
chr3	74393688	74393909	-	Bov-tA1	SINE	chr3	74392228	74394707
chr3	88045617	88045837	+	MER58A	DNA	chr3	88044516	88046507
chr3	92602029	92602267	-	LTR16E2	LTR	chr3	92601543	92603267
chr3	101698518	101698590	+	Bov-tA3	SINE	chr3	101698144	101699934
chr3	102255915	102255982	+	Bov-tA3	SINE	chr3	102254510	102257550
chr3	109596680	109596840	+	BovB	LINE	chr3	109595294	109600287
chr3	109834327	109834429	-	Bov-tA2	SINE	chr3	109833275	109835859
chr4	12734970	12735117	+	MIR	SINE	chr4	12733091	12736573
chr4	21094608	21094739	-	LTR39C_BT	LTR	chr4	21093765	21096117
chr4	30415960	30416453	-	MamGypsy2-I	LTR	chr4	30414733	30419869
chr4	38344062	38344267	+	Bov-tA2	SINE	chr4	38342993	38345151
chr4	55546514	55546702	+	Bov-tA2	SINE	chr4	55545825	55547099
chr4	60406471	60406538	-	Bov-tA3	SINE	chr4	60404701	60408179
chr4	60543774	60544075	-	CHR-2A	SINE	chr4	60543233	60544984
chr4	65807710	65808289	-	MLT1N2	LTR	chr4	65806617	65808306
chr4	70617074	70617434	-	MLT1F1	LTR	chr4	70613834	70619750
chr4	86546421	86546965	+	L1ME3A	LINE	chr4	86545356	86547812
chr4	110749730	110751046	-	BTLTR1B	LTR	chr4	110749407	110752347
chr4	111622039	111622462	-	L2a	LINE	chr4	111620938	111622958
chr4	114179935	114180124	-	MER58A	DNA	chr4	114178155	114180770
chr5	1531690	1532125	+	L3	LINE	chr5	1531097	1534570
chr5	4112268	4112377	+	Bov-tA2	SINE	chr5	4111804	4113904
chr5	17549396	17549457	+	MLT1K	LTR	chr5	17548523	17550236
chr5	18384194	18384357	-	MER63A	DNA	chr5	18383550	18384938
chr5	30316284	30316840	+	LTR9B_EC	LTR	chr5	30312599	30318369
chr5	37939130	37939402	-	L2a	LINE	chr5	37937985	37940489
chr5	40818429	40818588	-	BovB	LINE	chr5	40817835	40820079
chr5	45722571	45723447	+	L1-3_BT	LINE	chr5	45721380	45723749
chr5	47571021	47571067	-	Bov-A2	SINE	chr5	47569424	47572403
chr5	57432823	57433043	+	MIRb	SINE	chr5	57430905	57434377
chr5	60300285	60301559	+	BTLTR1B	LTR	chr5	60300094	60301448
chr5	73325619	73325926	-	MLT1C2	LTR	chr5	73325274	73326509
chr5	73373405	73373612	+	MIRb	SINE	chr5	73372755	73374969
chr5	82018290	82018395	+	AmnSINE1	SINE	chr5	82017174	82019269
chr5	91260618	91260782	+	MLT1H	LTR	chr5	91259559	91261117
chr5	98372075	98372235	-	BovB	LINE	chr5	98368823	98374945
chr5	106625027	106625093	+	L2c	LINE	chr5	106623052	106627760
chr5	111698776	111698857	+	MIRc	SINE	chr5	111697905	111699611
chr5	112592432	112592857	-	MLT1F	LTR	chr5	112588759	112593253
chr5	112595300	112596581	+	BTLTR1B	LTR	chr5	112594255	112599110
chr5	113550805	113550913	+	L2b	LINE	chr5	113550191	113552016
chr5	115747704	115748746	-	BovB	LINE	chr5	115747877	115749424
chr5	116036939	116037391	+	L1ME2	LINE	chr5	116035489	116038086
chr6	11461270	11461467	-	HERVL40-int	LTR	chr6	11459369	11464157
chr6	21783019	21783196	-	Tigger1a_Art	DNA	chr6	21781270	21784998
chr6	41996613	41996953	-	L1ME3F	LINE	chr6	41994852	41997616
chr6	58364594	58365136	-	MLT1F2	LTR	chr6	58363464	58365811
chr6	62811826	62811976	+	BovB	LINE	chr6	62810822	62813220
chr6	81728405	81728676	+	Bov-A2	SINE	chr6	81725988	81728734
chr6	84709348	84710586	+	L1MA9	LINE	chr6	84709170	84711559
chr6	84848847	84848922	+	BTLTR1	LTR	chr6	84848007	84849402
chr6	84884512	84885832	+	BTLTR1F	LTR	chr6	84884134	84885724
chr6	91749478	91749554	-	MIR	SINE	chr6	91748712	91750975
chr6	109190533	109191030	-	LTR39D_BT	LTR	chr6	109188833	109191832
chr6	114057634	114057914	-	L2c	LINE	chr6	114056954	114061404
chr6	115725325	115725622	+	LTR13B_BT	LTR	chr6	115724391	115726485
chr7	1576764	1577797	+	L1-3_BT	LINE	chr7	1575311	1578148
chr7	5262509	5262735	-	MER113	DNA	chr7	5261060	5263819
chr7	7923282	7923518	-	BovB	LINE	chr7	7922566	7924796
chr7	15127438	15127654	+	Bov-tA1	SINE	chr7	15125563	15128157
chr7	16946908	16947451	-	L1MB5	LINE	chr7	16943318	16951229
chr7	22169677	22169955	+	MamGypLTR3	LTR	chr7	22166341	22171240
chr7	22175292	22175394	-	SINE2-1_BT	SINE	chr7	22173403	22177828
chr7	39053368	39053923	+	ERVL-E-int	LTR	chr7	39051507	39054495
chr7	43886456	43886657	-	Bov-tA2	SINE	chr7	43885973	43888504
chr7	44981809	44981870	+	MER41_BT	LTR	chr7	44980122	44982905
chr7	45012954	45013687	+	MER20B	DNA	chr7	45010641	45013906
chr7	50947050	50947175	+	X21_LINE	LINE	chr7	50946123	50947773
chr7	60325284	60325448	+	MIRb	SINE	chr7	60321907	60327136
chr7	82372862	82374141	-	BTLTR1B	LTR	chr7	82372321	82375671
chr7	88115539	88115707	-	BovB	LINE	chr7	88114040	88116751
chr7	100038351	100039537	-	BTLTR1B	LTR	chr7	100037932	100040827
chr8	521709	521909	+	Bov-tA1	SINE	chr8	520663	525395
chr8	42085713	42085893	-	MIRc	SINE	chr8	42083038	42087454
chr8	46653356	46653494	+	Tigger19b	DNA	chr8	46652702	46654102
chr8	47617501	47618800	+	BTLTR1B	LTR	chr8	47616607	47619078
chr8	51277640	51278951	-	BTLTR1B	LTR	chr8	51277924	51278827
chr8	62598413	62598619	-	Bov-tA2	SINE	chr8	62595722	62599660
chr8	69484958	69485168	+	Bov-tA2	SINE	chr8	69477524	69487962
chr8	77725677	77726105	+	MLT1C2	LTR	chr8	77725174	77726601
chr8	81886168	81886860	+	BovB	LINE	chr8	81882934	81887732
chr8	86173874	86175147	+	BTLTR1B	LTR	chr8	86173735	86175307
chr8	103186357	103186481	-	MIRb	SINE	chr8	103181399	103188758
chr8	109608725	109608932	-	Bov-tA2	SINE	chr8	109607598	109610058
chr9	23280975	23281395	+	Tigger1a_Art	DNA	chr9	23276432	23283274
chr9	32133618	32133824	+	Bov-tA2	SINE	chr9	32132663	32134662
chr9	34360122	34360165	+	MER5A	DNA	chr9	34359002	34361204
chr9	39290087	39290345	+	L3	LINE	chr9	39289150	39291924
chr9	60279801	60280484	-	L3	LINE	chr9	60279808	60281712
chr9	72827588	72827852	-	MLT1J	LTR	chr9	72826740	72829116
chr9	75868910	75869110	+	MLT1M	LTR	chr9	75867471	75870049
chr9	80287969	80288174	+	MIRc	SINE	chr9	80285563	80288954
chr9	87086647	87086716	+	Bov-tA2	SINE	chr9	87086246	87087684
chr9	94454231	94454400	-	BovB	LINE	chr9	94450669	94459509
chr9	94612187	94613500	-	BTLTR1B	LTR	chr9	94610839	94614996
chr9	96841872	96841981	-	BovB	LINE	chr9	96839949	96846012
chr9	101321820	101322430	+	Tigger17a	DNA	chr9	101319323	101323266
chr9	101888130	101888856	+	L1MC4	LINE	chr9	101885052	101888914
chrX	89378432	89379332	-	L1-3_BT	LINE	chrX	89377892	89379728
chrX	90074950	90075374	+	ALTR2B_BT	LTR	chrX	90073604	90076140
chrX	97451767	97451984	-	Bov-tA1	SINE	chrX	97451204	97452385
chrX	118650908	118651110	+	Bov-tA2	SINE	chrX	118650128	118652310
chrX	119415307	119415472	+	MER5B	DNA	chrX	119415057	119417146
chrX	120093550	120094849	-	BovB	LINE	chrX	120093297	120094966

## Sheet: Nonresponsive H3K27ac TEs
Chromosome	Start	End	Strand	Family	Class	Peak chromosome	Peak start	Peak end
chr1	2226993	2227646	-	MER34-int	LTR	chr1	2226288	2228067
chr1	6839156	6839426	-	Bov-A2	SINE	chr1	6832326	6841127
chr1	9423489	9424035	-	Tigger12	DNA	chr1	9423011	9424417
chr1	21900082	21900287	-	Bov-tA2	SINE	chr1	21899320	21901326
chr1	43132620	43132825	+	BovB	LINE	chr1	43130843	43137501
chr1	43230424	43231395	+	L1-3_BT	LINE	chr1	43229591	43233689
chr1	45384343	45385146	-	MER45C	DNA	chr1	45383545	45387113
chr1	46129677	46130343	+	LTR39B_BT	LTR	chr1	46129232	46130925
chr1	49830849	49831147	-	ERVL-int	LTR	chr1	49829628	49831981
chr1	67682845	67683017	-	Bov-tA2	SINE	chr1	67681441	67684371
chr1	68123269	68123506	+	MLT1B	LTR	chr1	68121510	68125755
chr1	71312954	71313299	+	L1MB8	LINE	chr1	71311528	71313775
chr1	72408718	72408790	+	UCON29	DNA	chr1	72407506	72410318
chr1	80665683	80665860	-	MER87A2_BT	LTR	chr1	80664509	80666729
chr1	82068668	82068879	+	Bov-tA2	SINE	chr1	82067766	82069621
chr1	83162999	83163312	-	BovB	LINE	chr1	83161849	83163608
chr1	89248145	89248362	+	MamRep605	LTR?	chr1	89247652	89249363
chr1	89485751	89486083	-	MLT1F2	LTR	chr1	89484971	89487349
chr1	89641418	89641604	+	Bov-tA2	SINE	chr1	89639975	89641872
chr1	89764397	89764470	+	L2d2	LINE	chr1	89763174	89765343
chr1	90135654	90135890	-	BovB	LINE	chr1	90131974	90136414
chr1	93904439	93904645	-	Tigger17a	DNA	chr1	93903323	93905953
chr1	98523781	98523981	+	Bov-tA2	SINE	chr1	98522960	98524283
chr1	114549811	114549998	+	MER20	DNA	chr1	114548566	114550875
chr1	121884921	121887289	+	Tigger1	DNA	chr1	121884979	121886209
chr1	122375001	122375137	-	BovB	LINE	chr1	122372914	122377290
chr1	127439998	127440194	+	BovB	LINE	chr1	127438510	127441196
chr1	130366045	130366266	+	Bov-tA2	SINE	chr1	130365859	130368520
chr1	130366187	130366422	+	Bov-A2	SINE	chr1	130365859	130368520
chr1	132607388	132607563	+	BovB	LINE	chr1	132606077	132608282
chr1	133383840	133385031	+	L3	LINE	chr1	133383249	133384775
chr1	135294368	135294767	-	Charlie13a	DNA	chr1	135294233	135295715
chr1	136772952	136773395	+	BovB	LINE	chr1	136772368	136773522
chr1	143381399	143382118	-	L1ME3E	LINE	chr1	143380769	143382422
chr1	145112785	145112933	-	BovB	LINE	chr1	145109404	145114404
chr1	147153548	147153753	-	Bov-tA2	SINE	chr1	147152504	147156823
chr1	148101884	148102086	-	Bov-tA2	SINE	chr1	148101300	148102757
chr1	152647039	152647470	-	MLT1D	LTR	chr1	152646313	152647525
chr1	158486613	158486745	-	MER5B	DNA	chr1	158486115	158487242
chr10	1598519	1598881	-	L1-3_BT	LINE	chr10	1597124	1599377
chr10	1830035	1831385	+	L3	LINE	chr10	1828976	1831541
chr10	4348229	4348501	+	L1MEd	LINE	chr10	4347796	4349176
chr10	9612045	9612380	-	BovB	LINE	chr10	9608118	9612997
chr10	11200931	11201310	+	Tigger9b	DNA	chr10	11199980	11201806
chr10	26619864	26620066	-	BovB	LINE	chr10	26619036	26620726
chr10	26754732	26757891	-	ERV2-1-I_BT	LTR	chr10	26756931	26759867
chr10	28422148	28422291	-	Bov-A2	SINE	chr10	28420817	28422793
chr10	34957965	34958246	-	BovB	LINE	chr10	34956244	34960753
chr10	42820454	42820754	-	7SLRNA	srpRNA	chr10	42818549	42821469
chr10	43226656	43226752	-	MIR3	SINE	chr10	43226193	43227490
chr10	47161734	47162375	+	L1MB7	LINE	chr10	47157728	47163735
chr10	49347476	49349184	+	HAL1	LINE	chr10	49348072	49349271
chr10	51109687	51110238	-	MLT1F1	LTR	chr10	51107024	51112097
chr10	65285888	65285957	-	MIR	SINE	chr10	65285344	65286753
chr10	66917719	66918026	+	LTR88c	LTR	chr10	66916610	66918550
chr10	67097417	67097835	+	L4_C_Mam	LINE	chr10	67095052	67098413
chr10	67191841	67192319	-	MLT1F1	LTR	chr10	67191121	67193975
chr10	71990136	71990230	-	MIR	SINE	chr10	71989434	71991296
chr10	72456466	72456717	-	MER77B	LTR	chr10	72455424	72457110
chr10	72933104	72935004	-	L2a	LINE	chr10	72932930	72937545
chr10	77327483	77327729	+	LTR16E2	LTR	chr10	77326545	77330377
chr10	77808660	77808958	+	CHR-2	SINE	chr10	77807247	77809206
chr10	80354636	80354758	-	AmnSINE1	SINE	chr10	80354312	80355555
chr10	81975445	81975578	+	CHRL	SINE	chr10	81973745	81976426
chr10	85840796	85840901	-	MIRb	SINE	chr10	85839616	85841954
chr10	87671945	87672084	+	MIRb	SINE	chr10	87670272	87673743
chr10	90799241	90799748	-	MLT1F	LTR	chr10	90798601	90802039
chr10	99064585	99064646	-	Bov-tA2	SINE	chr10	99063907	99065413
chr10	99967772	99968151	+	L1M7	LINE	chr10	99967182	99968408
chr10	101909563	101910081	-	L1MB8	LINE	chr10	101909276	101911200
chr11	1090505	1090603	-	MIRc	SINE	chr11	1089450	1091285
chr11	4084779	4084951	-	Bov-tA2	SINE	chr11	4083485	4086034
chr11	4105519	4105716	+	LTR84b	LTR	chr11	4103009	4109119
chr11	4561277	4561366	-	Bov-A2	SINE	chr11	4561030	4562485
chr11	4608521	4609173	+	MER21C_BT	LTR	chr11	4607240	4610239
chr11	10916689	10916977	+	CHR-2A	SINE	chr11	10916151	10917922
chr11	11043813	11044275	+	L2	LINE	chr11	11042977	11045370
chr11	20033956	20034236	+	MER58B	DNA	chr11	20032818	20035146
chr11	21692961	21693224	-	BovB	LINE	chr11	21689499	21694600
chr11	22002667	22003171	-	L1M4	LINE	chr11	22002371	22003787
chr11	25616615	25616702	-	Tigger19a	DNA	chr11	25614903	25618306
chr11	37596195	37597169	+	L1-3_BT	LINE	chr11	37595452	37597047
chr11	37744193	37745521	+	L1MB7	LINE	chr11	37743240	37749878
chr11	37845766	37846013	-	Bov-A2	SINE	chr11	37844339	37847279
chr11	38121227	38121464	+	CHR-2A	SINE	chr11	38120725	38123765
chr11	46320623	46320829	-	Bov-tA2	SINE	chr11	46319898	46321893
chr11	46907197	46907315	+	L2c	LINE	chr11	46904444	46913930
chr11	63106795	63107046	+	AmnHarb1	DNA	chr11	63100920	63112395
chr11	63817079	63817397	+	L2	LINE	chr11	63816708	63817704
chr11	70192819	70192937	-	Bov-A2	SINE	chr11	70191789	70193873
chr11	70192835	70192942	-	Bov-tA2	SINE	chr11	70191789	70193873
chr11	71840458	71840618	-	MIR3	SINE	chr11	71839252	71842602
chr11	72083927	72084410	+	MLT1H1	LTR	chr11	72083531	72084582
chr11	73034808	73034973	+	L3	LINE	chr11	73034182	73035700
chr11	73463797	73463882	+	MIR3	SINE	chr11	73461587	73469193
chr11	75598030	75598243	+	Bov-tA2	SINE	chr11	75597431	75598646
chr11	78403931	78404843	-	BovB	LINE	chr11	78402195	78405786
chr11	78414311	78414572	-	MER68	LTR	chr11	78413256	78415703
chr11	78792541	78792804	+	Charlie25	DNA	chr11	78790627	78793671
chr11	89070180	89070273	+	MIR	SINE	chr11	89069375	89070609
chr11	89998829	89998996	+	Bov-tA2	SINE	chr11	89998060	90002914
chr11	90651552	90651754	-	MLT1B	LTR	chr11	90650600	90652468
chr11	92505461	92506522	-	BovB	LINE	chr11	92504705	92506317
chr11	92950022	92950124	-	L2b	LINE	chr11	92948563	92951026
chr11	95112135	95112285	-	MIRb	SINE	chr11	95111560	95112573
chr11	95734738	95734956	+	MIRb	SINE	chr11	95733737	95735621
chr11	98703317	98703788	+	MER76	LTR	chr11	98702844	98704201
chr11	100227226	100227433	-	Bov-tA3	SINE	chr11	100226286	100227867
chr11	101807367	101807660	-	L1MC5a	LINE	chr11	101806737	101808377
chr12	8539863	8539957	-	ERVL-B4-int	LTR	chr12	8538359	8540431
chr12	11310215	11310630	+	MLT1B	LTR	chr12	11307633	11312375
chr12	14640231	14641400	-	L2b	LINE	chr12	14639174	14642564
chr12	15091136	15091299	-	BovB	LINE	chr12	15090111	15092475
chr12	16511380	16511570	+	Bov-tA2	SINE	chr12	16509038	16512251
chr12	21439527	21439742	-	Bov-tA2	SINE	chr12	21438888	21440111
chr12	21594064	21595125	+	L1-3_BT	LINE	chr12	21594034	21596876
chr12	21825518	21825701	-	L2a	LINE	chr12	21825276	21826248
chr12	23017601	23017843	+	LTR40a	LTR	chr12	23017020	23018104
chr12	27193176	27193381	-	BovB	LINE	chr12	27188577	27194530
chr12	27443915	27444505	+	MER21C	LTR	chr12	27442611	27444909
chr12	35133962	35134230	-	L1M4	LINE	chr12	35132827	35135109
chr12	35534479	35534890	+	L2a	LINE	chr12	35532745	35536109
chr12	36286538	36287267	-	L2a	LINE	chr12	36286068	36287599
chr12	50369567	50369789	-	Bov-tA1	SINE	chr12	50369128	50370598
chr12	50838836	50839018	+	Bov-A2	SINE	chr12	50837465	50840087
chr12	50863167	50863428	+	Bov-A2	SINE	chr12	50861796	50863997
chr12	52530160	52531226	-	L1-3_BT	LINE	chr12	52530074	52531266
chr12	53049650	53049788	+	BovB	LINE	chr12	53048879	53050421
chr12	55098636	55098794	+	MIR1_Amn	SINE	chr12	55096332	55100524
chr12	55319468	55319806	-	L2d2	LINE	chr12	55318826	55320722
chr12	74492405	74492480	+	L2d	LINE	chr12	74488020	74493227
chr12	75477580	75477651	+	Bov-A2	SINE	chr12	75476673	75479533
chr12	76348466	76348673	+	Bov-tA3	SINE	chr12	76347561	76350064
chr12	83579819	83580276	-	ALTR2C_BT	LTR	chr12	83579626	83581247
chr13	25373249	25373446	-	L1-2_BT	LINE	chr13	25372249	25374044
chr13	25518322	25518424	-	L2a	LINE	chr13	25517746	25519339
chr13	25610162	25610268	-	Bov-A2	SINE	chr13	25607799	25611030
chr13	25874717	25874967	+	LTR82B	LTR	chr13	25873253	25875902
chr13	31505124	31505583	+	MLT1G	LTR	chr13	31503308	31505955
chr13	42933312	42933732	+	L1ME3A	LINE	chr13	42930258	42933897
chr13	44121248	44121440	-	Bov-tA2	SINE	chr13	44120630	44121847
chr13	46412871	46413091	-	L1M4	LINE	chr13	46410392	46413889
chr13	46771655	46771799	-	MIR	SINE	chr13	46770836	46772487
chr13	47344668	47345370	+	L2a	LINE	chr13	47343853	47346292
chr13	58041195	58041420	+	HAL1	LINE	chr13	58040275	58044037
chr13	60310252	60310595	+	MLT1E2	LTR	chr13	60309719	60310918
chr13	65183824	65184007	-	LTR11B_BT	LTR	chr13	65180882	65184027
chr13	65715192	65715483	+	L1ME3A	LINE	chr13	65714763	65716576
chr13	69718013	69718483	-	MLT1F1	LTR	chr13	69717520	69718871
chr13	73658005	73658256	-	Bov-A2	SINE	chr13	73657921	73658777
chr13	81318784	81318915	-	L2b	LINE	chr13	81316856	81320349
chr14	332964	333395	+	L2b	LINE	chr14	332207	333326
chr14	7964575	7964781	+	Bov-tA3	SINE	chr14	7961372	7966916
chr14	10063796	10064374	+	MLT1L	LTR	chr14	10062276	10065782
chr14	10986854	10987139	+	LTR37A	LTR	chr14	10985895	10988249
chr14	14828555	14828749	-	Bov-tA2	SINE	chr14	14827988	14829617
chr14	14846716	14846818	-	MIR3	SINE	chr14	14846478	14848897
chr14	15039188	15039392	+	Bov-tA2	SINE	chr14	15038500	15041047
chr14	16625301	16625992	+	LTR39B_BT	LTR	chr14	16624845	16625884
chr14	19595670	19595813	-	Tigger6b	DNA	chr14	19594892	19596412
chr14	21042276	21042446	+	MIR	SINE	chr14	21040621	21044136
chr14	24318269	24318466	-	Bov-tA2	SINE	chr14	24316914	24320150
chr14	24414365	24414567	-	Bov-tA2	SINE	chr14	24413879	24415293
chr14	24807027	24807235	+	BovB	LINE	chr14	24806804	24808377
chr14	24930819	24931865	-	L1-3_BT	LINE	chr14	24930706	24931903
chr14	36796216	36796520	+	L2c	LINE	chr14	36794465	36797547
chr14	48727764	48727898	+	MIRc	SINE	chr14	48727099	48728492
chr14	64137427	64137606	+	MLT1K	LTR	chr14	64135956	64138204
chr14	74443648	74444255	-	BovB	LINE	chr14	74442055	74444347
chr14	74552771	74553131	+	L2b	LINE	chr14	74552101	74553800
chr15	9969861	9970082	+	Bov-tA2	SINE	chr15	9967357	9972671
chr15	17775064	17776816	+	Tigger1	DNA	chr15	17774529	17776220
chr15	29699079	29699281	-	Bov-tA1	SINE	chr15	29698481	29700236
chr15	33264887	33265036	+	MARNA	DNA	chr15	33263184	33266033
chr15	33264932	33265038	-	MARNA	DNA	chr15	33263184	33266033
chr15	33714453	33714651	-	Bov-tA2	SINE	chr15	33713428	33715181
chr15	38009170	38009370	+	Bov-tA2	SINE	chr15	38007090	38009763
chr15	38787345	38787536	+	MIRb	SINE	chr15	38786788	38788226
chr15	38901396	38901474	+	Bov-tA2	SINE	chr15	38900887	38901868
chr15	39937419	39937745	+	L1-2_BT	LINE	chr15	39936851	39939565
chr15	51632726	51632869	+	Tigger1	DNA	chr15	51631982	51633728
chr15	51789632	51789806	+	L2a	LINE	chr15	51789305	51790455
chr15	52565852	52566029	-	MLT1H	LTR	chr15	52563879	52567682
chr15	53212700	53212929	-	L1MB7	LINE	chr15	53212099	53213095
chr15	53645878	53646391	+	MamRep1527	LTR	chr15	53644837	53647105
chr15	54069317	54069969	-	L2c	LINE	chr15	54068049	54070112
chr15	56252054	56252296	-	Tigger6a	DNA	chr15	56251761	56253122
chr15	64634935	64635333	-	MLT1I	LTR	chr15	64634695	64636378
chr15	64914230	64914408	+	Bov-tA2	SINE	chr15	64913365	64915604
chr15	65147716	65148001	+	L2a	LINE	chr15	65147375	65150268
chr15	65624914	65625290	+	BovB	LINE	chr15	65623883	65626865
chr15	74829721	74830017	-	Charlie19a	DNA	chr15	74828302	74830117
chr15	77580567	77580938	+	BovB	LINE	chr15	77579616	77581472
chr15	77669212	77669586	-	MLT1J1	LTR	chr15	77668906	77671098
chr16	4833278	4833431	+	MIR3	SINE	chr16	4832349	4834277
chr16	14045077	14045340	-	L1MCa	LINE	chr16	14044254	14045860
chr16	22121152	22121341	-	L1-3_BT	LINE	chr16	22117355	22125493
chr16	27105619	27105883	+	Bov-A2	SINE	chr16	27102677	27106617
chr16	33818935	33819912	-	L2c	LINE	chr16	33819009	33820846
chr16	33934872	33935100	+	MIR	SINE	chr16	33931753	33936610
chr16	35153247	35153753	+	ALTR2B1_BT	LTR	chr16	35151759	35154075
chr16	35646803	35647015	+	Bov-tA2	SINE	chr16	35645617	35647956
chr16	37960964	37961176	+	MIRc	SINE	chr16	37959227	37963821
chr16	48264626	48264873	-	ALTR39_BT	LTR	chr16	48264048	48265382
chr16	51165760	51166277	-	L1MC3	LINE	chr16	51165002	51166853
chr16	51866161	51867172	-	BovB	LINE	chr16	51865804	51866931
chr16	53922854	53923007	-	Bov-A2	SINE	chr16	53920020	53923719
chr16	56068781	56069431	-	L2b	LINE	chr16	56068921	56069820
chr16	60000055	60000291	+	BovB	LINE	chr16	59997898	60000827
chr16	62266273	62266346	-	MARNA	DNA	chr16	62263753	62267406
chr16	63645139	63646415	-	BTLTR1B	LTR	chr16	63644992	63647767
chr16	64213521	64213667	+	X2a_DNA	DNA	chr16	64212995	64214730
chr16	64231736	64231803	-	Bov-tA3	SINE	chr16	64230932	64232535
chr16	65895144	65895546	-	BovB	LINE	chr16	65894595	65896575
chr16	78146414	78146716	-	BovB	LINE	chr16	78145843	78146996
chr17	11786004	11786162	-	BovB	LINE	chr17	11785346	11787970
chr17	29512405	29512571	+	BovB	LINE	chr17	29510865	29518174
chr17	29727983	29728663	-	MER21C	LTR	chr17	29726625	29729154
chr17	39992492	39992789	-	BovB	LINE	chr17	39991075	39993242
chr17	41763097	41764076	+	L1MEc	LINE	chr17	41762399	41764191
chr17	42263237	42263879	-	LTR39_BT	LTR	chr17	42262091	42264319
chr17	45147487	45147706	+	Bov-tA1	SINE	chr17	45146704	45148279
chr17	46295112	46295399	+	MLT1F	LTR	chr17	46293655	46296387
chr17	51284509	51284732	-	BovB	LINE	chr17	51275659	51286462
chr17	53607862	53607990	-	Bov-tA1	SINE	chr17	53607373	53608762
chr17	53772518	53772634	-	SINE2-1_BT	SINE	chr17	53771559	53773662
chr17	54128827	54129254	-	LTR16A1	LTR	chr17	54127344	54129490
chr17	55301944	55302150	+	MLT1L	LTR	chr17	55301203	55302797
chr17	56978166	56978334	-	BovB	LINE	chr17	56977494	56978936
chr17	63424879	63425102	-	MIR	SINE	chr17	63423013	63425470
chr17	70057828	70057958	+	MIRb	SINE	chr17	70056878	70058744
chr17	71449587	71449757	+	BovB	LINE	chr17	71448906	71451808
chr18	7742321	7742402	-	MIRb	SINE	chr18	7740960	7743209
chr18	12442930	12443201	-	Bov-A2	SINE	chr18	12442728	12443757
chr18	22087607	22087803	-	MARE8	DNA	chr18	22086569	22088308
chr18	24959677	24959779	+	L2b	LINE	chr18	24959297	24961384
chr18	31459955	31460571	-	BovB	LINE	chr18	31458660	31460048
chr18	35539232	35539666	-	HAL1	LINE	chr18	35538883	35540091
chr18	35593628	35594106	-	L3	LINE	chr18	35592725	35596104
chr18	36173444	36173779	-	CHR-2	SINE	chr18	36170901	36174400
chr18	38160208	38160752	-	MLT1F2	LTR	chr18	38152444	38162611
chr18	39286154	39286275	+	MIRc	SINE	chr18	39285088	39287217
chr18	44712984	44713076	+	MLT1J1	LTR	chr18	44712233	44713952
chr18	51877308	51877508	-	Bov-tA3	SINE	chr18	51876328	51882815
chr19	5914775	5914893	+	Bov-tA2	SINE	chr19	5913611	5916652
chr19	6217697	6218253	-	L2a	LINE	chr19	6217320	6219228
chr19	12680858	12681387	-	L1MCc	LINE	chr19	12677645	12681732
chr19	13789172	13789520	-	MER58B	DNA	chr19	13786936	13791123
chr19	17393363	17393622	-	Bov-A2	SINE	chr19	17387937	17397352
chr19	20964897	20965168	+	Bov-A2	SINE	chr19	20962237	20966256
chr19	21017546	21017958	-	L2c	LINE	chr19	21016485	21021301
chr19	21432622	21433069	+	MLT1F2	LTR	chr19	21430061	21437448
chr19	21561025	21561293	+	Bov-A2	SINE	chr19	21558371	21561997
chr19	21687187	21687226	+	Bov-A2	SINE	chr19	21685834	21691043
chr19	22137772	22137969	-	MamRTE1	LINE	chr19	22136955	22139998
chr19	22533080	22533143	-	MLT1I	LTR	chr19	22532512	22533945
chr19	24786906	24787423	+	L2	LINE	chr19	24785782	24788356
chr19	25009826	25009932	-	MIR	SINE	chr19	25008030	25010907
chr19	33591148	33591251	+	L1M5	LINE	chr19	33590171	33592291
chr19	34184309	34184653	+	CHR-2	SINE	chr19	34183165	34191654
chr19	43195584	43195771	+	U2	snRNA	chr19	43195012	43196791
chr19	48248032	48248116	-	SINE2-1_BT	SINE	chr19	48247314	48249402
chr19	53937166	53937234	+	Bov-tA2	SINE	chr19	53936937	53938016
chr19	55753779	55753971	+	Bov-tA2	SINE	chr19	55753432	55754446
chr19	56187014	56187135	+	MIRb	SINE	chr19	56185798	56187603
chr2	5817308	5817446	-	MER3	DNA	chr2	5816240	5817812
chr2	7410932	7410977	+	AmnSINE1	SINE	chr2	7409503	7411209
chr2	9703848	9704886	+	L1-3_BT	LINE	chr2	9703919	9705729
chr2	9715263	9715782	+	Charlie24	DNA	chr2	9713689	9717209
chr2	17635257	17635410	-	L1MD1	LINE	chr2	17632461	17637088
chr2	17635384	17635595	+	BovB	LINE	chr2	17632461	17637088
chr2	23487034	23487579	-	Tigger22N1	DNA	chr2	23486871	23488393
chr2	24273379	24274034	-	LTR1_BT	LTR	chr2	24270453	24275641
chr2	24952121	24952238	+	Eutr5	LTR?	chr2	24951621	24953460
chr2	35939875	35940177	-	MLT1M	LTR	chr2	35938353	35945515
chr2	37049914	37050343	+	MLT1F	LTR	chr2	37048640	37050617
chr2	45707213	45707421	-	Bov-tA2	SINE	chr2	45697137	45708080
chr2	48830938	48831194	+	Plat_L3	LINE	chr2	48829435	48831902
chr2	48849831	48849997	-	BovB	LINE	chr2	48849426	48850828
chr2	65045939	65046462	+	LTR10B_BT	LTR	chr2	65045381	65047528
chr2	79859142	79859215	+	MER94	DNA	chr2	79856661	79860895
chr2	84437376	84437804	-	MLT1J	LTR	chr2	84436516	84437867
chr2	88944258	88944399	-	L2b	LINE	chr2	88943404	88945114
chr2	92976599	92976676	+	Bov-tA2	SINE	chr2	92975283	92978321
chr2	93109676	93109880	+	Bov-tA2	SINE	chr2	93108840	93110636
chr2	95445187	95445538	-	L2d2	LINE	chr2	95444400	95447387
chr2	95876822	95876966	-	BovB	LINE	chr2	95875952	95877769
chr2	103587827	103587939	-	Bov-tA2	SINE	chr2	103586996	103589661
chr2	104599713	104599982	+	LTR6B_BT	LTR	chr2	104598483	104601575
chr2	114635199	114635400	-	Bov-tA2	SINE	chr2	114635154	114636248
chr2	115793881	115794492	-	ERV1-1B-LTR_BT	LTR	chr2	115793909	115795064
chr2	120414249	120414427	+	L2c	LINE	chr2	120413209	120415618
chr2	120721529	120721734	-	Bov-tA3	SINE	chr2	120720491	120722233
chr2	122270459	122270636	+	Bov-tA2	SINE	chr2	122269868	122271483
chr2	122270587	122270646	+	Bov-A2	SINE	chr2	122269868	122271483
chr2	122373246	122373520	+	CHR-2B	SINE	chr2	122371861	122374114
chr2	128880697	128881183	-	LTR39_BT	LTR	chr2	128879828	128881623
chr2	130785762	130785920	-	Bov-A2	SINE	chr2	130782198	130787674
chr2	130785797	130785939	-	Bov-tA3	SINE	chr2	130782198	130787674
chr2	130791490	130792022	+	MLT1K	LTR	chr2	130790401	130792542
chr2	135068944	135069097	+	L1-2_BT	LINE	chr2	135068515	135069751
chr2	135759947	135760373	+	LTR45_BT	LTR	chr2	135758813	135761229
chr20	4603050	4603259	+	Bov-tA2	SINE	chr20	4602690	4604299
chr20	5362517	5362625	-	MIRb	SINE	chr20	5360913	5363831
chr20	12268905	12269059	+	MER5A	DNA	chr20	12267998	12269397
chr20	13585940	13586291	+	BovB	LINE	chr20	13585404	13588540
chr20	18759798	18760377	-	L2a	LINE	chr20	18759096	18760446
chr20	21349588	21350202	+	LTR104_Mam	LTR	chr20	21349112	21351421
chr20	23124220	23124485	+	L4_A_Mam	LINE	chr20	23122057	23126102
chr20	24100992	24101094	+	LTR90A	LTR	chr20	24098104	24103235
chr20	29960294	29960461	-	LTR78	LTR	chr20	29959571	29961178
chr20	34946244	34946299	+	L2b	LINE	chr20	34944537	34947651
chr20	35074909	35075123	-	Bov-tA1	SINE	chr20	35074278	35075569
chr20	41009066	41009477	-	MLT1H2	LTR	chr20	41008833	41010247
chr20	56375524	56375938	+	Charlie29a	DNA	chr20	56373793	56376606
chr20	59000537	59000742	-	Bov-tA2	SINE	chr20	58998901	59005895
chr20	62778244	62778423	+	MER74A	LTR	chr20	62776985	62780284
chr21	2376584	2377361	+	L1MB4	LINE	chr21	2376364	2378815
chr21	15151652	15151737	+	Bov-tA2	SINE	chr21	15151003	15152415
chr21	22701912	22702128	-	CHR-2A	SINE	chr21	22701433	22704581
chr21	23256634	23257136	+	MLT1L	LTR	chr21	23256064	23257654
chr21	24592334	24592414	-	L2b	LINE	chr21	24588139	24593513
chr21	24869025	24869159	-	Bov-A2	SINE	chr21	24868465	24870331
chr21	25962190	25962317	+	Bov-A2	SINE	chr21	25961719	25963112
chr21	26023722	26023791	-	LTR67B	LTR	chr21	26021653	26025132
chr21	26484819	26485020	-	Bov-tA2	SINE	chr21	26482669	26485743
chr21	42276194	42276403	-	Bov-tA2	SINE	chr21	42274403	42278264
chr21	44967956	44968121	+	U1	snRNA	chr21	44964956	44969257
chr21	45506122	45506198	-	Bov-tA2	SINE	chr21	45505581	45507201
chr21	47396306	47396486	-	BovB	LINE	chr21	47394795	47403187
chr21	49106218	49107146	+	Looper	DNA	chr21	49105990	49108776
chr21	54864181	54865240	-	L1MC4a	LINE	chr21	54863563	54865135
chr21	62943167	62943357	+	LTR16C	LTR	chr21	62942639	62943816
chr21	66645344	66645740	-	L1MA9	LINE	chr21	66644792	66647541
chr21	67729909	67731002	+	ERVL-E-int	LTR	chr21	67730043	67731347
chr21	68246351	68246585	-	L2	LINE	chr21	68245701	68246826
chr22	9920664	9920779	-	Bov-A2	SINE	chr22	9919475	9921328
chr22	9920683	9920863	-	Bov-tA2	SINE	chr22	9919475	9921328
chr22	11320155	11321459	-	BovB	LINE	chr22	11318072	11321196
chr22	30527230	30527434	+	AmnSINE1	SINE	chr22	30526412	30527930
chr22	39655316	39656086	-	L1-3_BT	LINE	chr22	39654794	39656521
chr22	40490861	40491244	-	MLT1F	LTR	chr22	40490477	40491991
chr22	47637487	47637887	-	LTR6B_BT	LTR	chr22	47637017	47638452
chr22	49349113	49349678	-	L2a	LINE	chr22	49346426	49350833
chr22	50443302	50443447	+	MIRc	SINE	chr22	50442558	50443651
chr22	53766858	53768164	+	BovB	LINE	chr22	53766866	53768629
chr22	54052930	54053359	+	MLT1F1	LTR	chr22	54052601	54054269
chr22	56689657	56689763	+	MIRc	SINE	chr22	56688875	56690444
chr22	56786561	56786860	-	L1MC5a	LINE	chr22	56783864	56788644
chr22	57620646	57620834	+	L1MA9	LINE	chr22	57619842	57621960
chr22	58408491	58408630	-	Eutr16	DNA?	chr22	58407483	58409440
chr23	3017393	3018018	-	L1MD2	LINE	chr23	3015947	3019256
chr23	6804147	6804275	-	MIR	SINE	chr23	6803687	6805372
chr23	13076394	13076596	-	Bov-tA2	SINE	chr23	13075186	13097820
chr23	13167510	13167619	+	MER5A	DNA	chr23	13166232	13168545
chr23	20669102	20669196	-	Bov-tA2	SINE	chr23	20667887	20669804
chr23	23612706	23612755	+	L2c	LINE	chr23	23611850	23614103
chr23	23650546	23650744	+	MER63A	DNA	chr23	23649151	23652024
chr23	33332859	33333050	+	MER63B	DNA	chr23	33331911	33339862
chr23	37345964	37346401	-	L2a	LINE	chr23	37345501	37347350
chr23	44155346	44155548	+	Bov-tA2	SINE	chr23	44154205	44159320
chr23	45597764	45598375	+	L2a	LINE	chr23	45596260	45598092
chr23	47880965	47881200	-	BovB	LINE	chr23	47879629	47882285
chr23	50691733	50693081	-	BTLTR1F	LTR	chr23	50691815	50693090
chr24	20383846	20384360	+	L1MD2	LINE	chr24	20383316	20385874
chr24	21510074	21510502	+	MER41_BT	LTR	chr24	21509519	21511174
chr24	23784542	23784609	-	Bov-tA3	SINE	chr24	23783663	23785208
chr24	25169425	25169782	+	BovB	LINE	chr24	25168782	25170116
chr24	34658558	34658880	+	MER21C	LTR	chr24	34657258	34659266
chr24	35071803	35072005	+	L2c	LINE	chr24	35070862	35072398
chr24	36918100	36918359	+	Charlie16	DNA	chr24	36917213	36918603
chr24	41671418	41671618	-	Bov-tA2	SINE	chr24	41670990	41672570
chr24	43022788	43023041	+	Tigger13a	DNA	chr24	43021166	43027748
chr24	44450764	44450976	-	MIRb	SINE	chr24	44449986	44452134
chr24	44604593	44604794	+	Bov-tA3	SINE	chr24	44603585	44605877
chr24	45921126	45921609	-	L1MC5	LINE	chr24	45920569	45921983
chr24	46637548	46637648	+	BovB	LINE	chr24	46636630	46638665
chr24	48562767	48562947	-	L2d2	LINE	chr24	48561460	48564460
chr24	50374098	50374240	-	BovB	LINE	chr24	50372205	50376085
chr24	53738962	53739299	+	BovB	LINE	chr24	53737792	53740268
chr25	3976129	3976541	+	L1MB7	LINE	chr25	3974893	3978753
chr25	8595222	8595660	+	L2b	LINE	chr25	8595138	8597953
chr25	8727662	8728117	+	BovB	LINE	chr25	8727539	8729798
chr25	8899865	8900144	-	MER102c	DNA	chr25	8892496	8901388
chr25	9584053	9584231	+	Bov-tA2	SINE	chr25	9582813	9584633
chr25	10233916	10233983	-	Bov-tA3	SINE	chr25	10232350	10234833
chr25	11466091	11466338	+	MIRb	SINE	chr25	11464658	11467292
chr25	14354678	14354743	+	Bov-tA1	SINE	chr25	14350613	14355732
chr25	14450937	14451126	-	SINE2-3_BT	SINE	chr25	14449522	14452457
chr25	16826912	16827504	-	LTR39B_BT	LTR	chr25	16826631	16827806
chr25	22394325	22394454	+	Bov-tA2	SINE	chr25	22389682	22394738
chr25	27805807	27806345	-	HAL1b	LINE	chr25	27805453	27806628
chr25	34233900	34235178	-	BovB	LINE	chr25	34233044	34234737
chr25	35026626	35026712	+	HAL1	LINE	chr25	35026281	35028477
chr25	37201755	37201868	+	SINE2-3_BT	SINE	chr25	37200449	37206772
chr26	8956326	8956528	+	Bov-tA2	SINE	chr26	8955374	8957548
chr26	12576529	12576645	-	SINE2-2_BT	SINE	chr26	12575867	12577221
chr26	13717671	13718082	+	L2d	LINE	chr26	13717150	13718223
chr26	15885186	15885387	-	BovB	LINE	chr26	15884011	15886168
chr26	16769704	16770053	+	L4_C_Mam	LINE	chr26	16768120	16772301
chr26	17492957	17493151	-	Bov-tA2	SINE	chr26	17490638	17493184
chr26	19364712	19365003	+	Tigger16a	DNA	chr26	19363515	19366149
chr26	32849145	32849299	+	MER117	DNA	chr26	32848741	32850733
chr26	32949040	32949207	+	L1MA9	LINE	chr26	32947804	32949722
chr26	38997002	38997299	+	LTR16C	LTR	chr26	38995589	39000108
chr26	45379421	45379527	+	MLT1H	LTR	chr26	45378799	45380760
chr27	16579372	16579520	-	L1_Art	LINE	chr27	16578892	16580490
chr27	19889033	19890024	-	LTR11B_BT	LTR	chr27	19889295	19891424
chr27	24427903	24428544	-	Tigger17a	DNA	chr27	24425967	24428914
chr27	24923882	24924383	-	BovB	LINE	chr27	24922552	24927541
chr27	33003564	33003744	+	MIR3	SINE	chr27	33002476	33004821
chr27	35176297	35176576	-	L1MC3	LINE	chr27	35176075	35177311
chr27	38745378	38745543	+	Tigger15a	DNA	chr27	38745372	38746148
chr27	42543838	42544678	+	L1MA9	LINE	chr27	42542862	42546359
chr28	4512725	4512866	-	BovB	LINE	chr28	4511827	4513382
chr28	6078341	6078483	+	MER117	DNA	chr28	6077644	6078874
chr28	15033559	15033734	+	Chap1_Mam	DNA	chr28	15032886	15033973
chr28	17461346	17461549	+	Bov-tA2	SINE	chr28	17459947	17462545
chr28	24672160	24672487	+	L2c	LINE	chr28	24669346	24674991
chr28	25753731	25753956	+	MER90a	LTR	chr28	25750904	25754230
chr28	27875143	27875319	-	LTR16C	LTR	chr28	27874732	27876004
chr28	28037757	28038041	+	L1MB5	LINE	chr28	28036536	28039888
chr28	28827321	28827795	+	MamRTE1	LINE	chr28	28827146	28828015
chr28	29903854	29903921	-	Bov-tA3	SINE	chr28	29902099	29905433
chr28	34811722	34811795	-	MIR3	SINE	chr28	34807555	34818696
chr28	37112568	37112773	-	Bov-tA2	SINE	chr28	37111308	37114199
chr29	1358409	1358711	-	Bov-A2	SINE	chr29	1353919	1360328
chr29	8379381	8379516	+	MER21C_BT	LTR	chr29	8378711	8381681
chr29	8487261	8487328	-	Bov-tA3	SINE	chr29	8485907	8487649
chr29	8726112	8726220	+	CHR-2A	SINE	chr29	8724865	8728651
chr29	9416085	9416325	+	Bov-tA2	SINE	chr29	9415242	9416738
chr29	9754056	9754589	+	MER68	LTR	chr29	9751216	9756605
chr29	17764711	17765101	-	L1MB7	LINE	chr29	17762228	17766205
chr29	18014255	18014576	-	LTR33	LTR	chr29	18008352	18017127
chr29	18438551	18438741	+	Tigger12A	DNA	chr29	18437641	18439618
chr29	36283812	36284084	+	Bov-A2	SINE	chr29	36283141	36287656
chr29	37126901	37127135	+	BovB	LINE	chr29	37126177	37130774
chr29	40545748	40545839	-	EUTREP2	DNA?	chr29	40544721	40546493
chr29	44997118	44997686	-	L1MA9	LINE	chr29	44997077	44998295
chr29	45112148	45112823	-	Tigger6a	DNA	chr29	45110854	45113251
chr29	45955416	45955943	-	L1MC1	LINE	chr29	45954861	45956361
chr29	47431447	47431641	-	Bov-tA2	SINE	chr29	47430502	47432249
chr29	49224355	49224932	+	L1MB8	LINE	chr29	49224163	49225168
chr3	9681699	9681865	+	LTR85c	LTR	chr3	9680494	9682342
chr3	12319405	12319807	+	BovB	LINE	chr3	12318829	12321488
chr3	12378311	12378379	-	Bov-tA2	SINE	chr3	12377414	12379227
chr3	13712776	13712875	-	L2c	LINE	chr3	13710940	13713673
chr3	16792282	16793008	-	LTR1_BT	LTR	chr3	16791171	16794962
chr3	18715784	18715891	-	MLT1G1	LTR	chr3	18715426	18717022
chr3	18844459	18844732	-	Bov-A2	SINE	chr3	18843608	18845360
chr3	19130000	19130874	+	L1ME1	LINE	chr3	19127223	19130812
chr3	20883353	20884497	-	BTLTR1F	LTR	chr3	20883465	20885827
chr3	27203255	27203536	+	Chap1_Mam	DNA	chr3	27200325	27204573
chr3	27596361	27596453	+	LFSINE_Vert	SINE	chr3	27595003	27596924
chr3	28892165	28893233	+	BovB	LINE	chr3	28892589	28894008
chr3	29948396	29948681	+	LTR67B	LTR	chr3	29945950	29952487
chr3	30028505	30028723	-	BovB	LINE	chr3	30025574	30030151
chr3	31639839	31639965	+	L2d	LINE	chr3	31638887	31640897
chr3	33892913	33892941	-	Bov-tA3	SINE	chr3	33892622	33893722
chr3	34219870	34219977	-	L2c	LINE	chr3	34218838	34224135
chr3	35444473	35444549	+	L1MC4	LINE	chr3	35442511	35447704
chr3	35466560	35466764	-	Bov-tA2	SINE	chr3	35466197	35468102
chr3	48428501	48428622	-	MER20	DNA	chr3	48427025	48429080
chr3	48500003	48500206	-	CHR-2	SINE	chr3	48499296	48500762
chr3	48705335	48705531	-	MIR	SINE	chr3	48704536	48706316
chr3	49058004	49058080	+	LTR39_BT	LTR	chr3	49055355	49059115
chr3	50140864	50141564	+	L1ME2	LINE	chr3	50140246	50143198
chr3	51513545	51513786	-	BovB	LINE	chr3	51510673	51514288
chr3	53666340	53666532	+	MIRb	SINE	chr3	53663679	53668008
chr3	57611185	57611468	-	BovB	LINE	chr3	57610374	57611776
chr3	57839334	57839966	+	BovB	LINE	chr3	57838448	57840663
chr3	66552751	66553193	+	MLT1K	LTR	chr3	66550287	66553995
chr3	68066873	68066957	-	L1MEc	LINE	chr3	68065874	68067572
chr3	81683308	81684185	-	L3	LINE	chr3	81683306	81684942
chr3	83200128	83200245	-	SINE2-2_BT	SINE	chr3	83199202	83200577
chr3	86873791	86874347	+	MLT1G1	LTR	chr3	86872852	86875261
chr3	91908442	91908590	-	MIRb	SINE	chr3	91907605	91910597
chr3	93261229	93261527	+	L1MC1	LINE	chr3	93260791	93261794
chr3	95361545	95361778	+	HERVL40-int	LTR	chr3	95361435	95363196
chr3	98228335	98228493	-	L2d2	LINE	chr3	98227552	98228979
chr3	98916048	98916515	+	BovB	LINE	chr3	98915637	98917991
chr3	102504638	102505522	+	L2	LINE	chr3	102502041	102505820
chr3	103517690	103517936	-	CHR-2A	SINE	chr3	103516502	103518890
chr3	103519552	103519792	+	BovB	LINE	chr3	103519008	103520822
chr3	105208498	105208624	+	MLT1H2	LTR	chr3	105204256	105214663
chr3	109577624	109577720	-	CR1-3_Croc	LINE	chr3	109577025	109580358
chr4	5118372	5118979	+	BovB	LINE	chr4	5117405	5119396
chr4	15760276	15760352	-	Bov-tA3	SINE	chr4	15759129	15760864
chr4	31407734	31407882	-	L2c	LINE	chr4	31406167	31408776
chr4	33990774	33991327	-	MLT1F2	LTR	chr4	33989812	33991690
chr4	38918356	38918927	+	L1-3_BT	LINE	chr4	38918445	38919521
chr4	44122705	44122943	+	BovB	LINE	chr4	44121637	44123412
chr4	46833901	46834379	-	L2b	LINE	chr4	46832751	46835087
chr4	46835944	46836409	+	MLT1F1	LTR	chr4	46835607	46836745
chr4	51863449	51863512	-	L1-2_BT	LINE	chr4	51862765	51864103
chr4	56820722	56820888	-	MER112	DNA	chr4	56820110	56821818
chr4	56881259	56881435	-	Bov-tA2	SINE	chr4	56877788	56882135
chr4	57559594	57559796	-	Bov-tA2	SINE	chr4	57559216	57560605
chr4	60364457	60365149	-	BovB	LINE	chr4	60363615	60365402
chr4	66116046	66116456	-	MLT1F	LTR	chr4	66115780	66116751
chr4	66813334	66813493	-	MIR3	SINE	chr4	66812269	66813883
chr4	93671130	93671427	-	L2a	LINE	chr4	93670418	93672295
chr4	106789952	106790015	+	Tigger19a	DNA	chr4	106788177	106792385
chr4	117114659	117115003	-	MLT1C2	LTR	chr4	117114720	117115776
chr5	1648828	1649385	-	L2a	LINE	chr5	1648982	1650310
chr5	1731438	1731640	+	Bov-tA2	SINE	chr5	1731392	1732898
chr5	1761464	1761891	+	MamGypLTR4	LTR	chr5	1760524	1762212
chr5	5162195	5162459	-	MLT1J	LTR	chr5	5160367	5163986
chr5	5920522	5921034	+	MLT1F2	LTR	chr5	5919782	5921397
chr5	9694304	9694552	+	Bov-A2	SINE	chr5	9692939	9694929
chr5	19689644	19689826	+	MER20	DNA	chr5	19689603	19690709
chr5	19933716	19933910	-	Bov-tA2	SINE	chr5	19933269	19934366
chr5	22430123	22430498	+	L2c	LINE	chr5	22428901	22430858
chr5	22795720	22795814	+	ERV54-EC_LTR	LTR	chr5	22795040	22796413
chr5	25854185	25854298	-	SINE2-1_BT	SINE	chr5	25853108	25856887
chr5	26450124	26451064	-	L1MC1	LINE	chr5	26446128	26450722
chr5	29324040	29324307	+	MIRc	SINE	chr5	29323299	29326249
chr5	30365926	30366122	-	Bov-tA2	SINE	chr5	30364847	30366540
chr5	30561430	30561845	-	LTR39_BT	LTR	chr5	30560410	30564791
chr5	33975114	33975340	-	Bov-tA1	SINE	chr5	33972937	33979033
chr5	34683645	34683664	+	Bov-A2	SINE	chr5	34682891	34683952
chr5	38133842	38133909	-	Bov-A2	SINE	chr5	38132865	38134492
chr5	40625136	40625328	-	Bov-tA2	SINE	chr5	40622262	40626259
chr5	41063933	41064013	-	BovB	LINE	chr5	41062023	41064648
chr5	46347357	46347707	+	LTR85c	LTR	chr5	46346862	46349819
chr5	48110350	48110554	+	LTR53	LTR	chr5	48109680	48111365
chr5	48587109	48587307	+	Bov-tA2	SINE	chr5	48586400	48587549
chr5	57140095	57140166	-	tRNA-Ser-TCG	tRNA	chr5	57138858	57142358
chr5	60127136	60128121	+	BovB	LINE	chr5	60127464	60128975
chr5	60735342	60735440	+	BovB	LINE	chr5	60734458	60736271
chr5	62755185	62755383	+	Bov-tA1	SINE	chr5	62750817	62756956
chr5	62755274	62755396	+	Bov-A2	SINE	chr5	62750817	62756956
chr5	70803921	70804091	-	L2d2	LINE	chr5	70802926	70804951
chr5	71667762	71667924	-	MER5A1	DNA	chr5	71666718	71669011
chr5	71971702	71971787	+	L2a	LINE	chr5	71970967	71973186
chr5	74182858	74183052	+	Bov-tA2	SINE	chr5	74182302	74184626
chr5	74669650	74669753	-	MER20	DNA	chr5	74668873	74669920
chr5	75170339	75170544	+	Bov-tA2	SINE	chr5	75168772	75170839
chr5	79850126	79850937	-	ERV1-1C-LTR_BT	LTR	chr5	79849253	79851027
chr5	83961892	83962246	+	hAT-1_Mam	DNA	chr5	83960364	83963169
chr5	85135197	85135398	-	Bov-tA2	SINE	chr5	85129661	85138714
chr5	90460032	90460183	+	L2a	LINE	chr5	90459057	90462009
chr5	103367720	103368307	+	ERV1-1C-LTR_BT	LTR	chr5	103367384	103368894
chr5	104087835	104087952	+	MamTip2b	DNA	chr5	104086770	104088312
chr5	112299875	112300094	+	Bov-A2	SINE	chr5	112299069	112300961
chr5	116350253	116350460	-	Bov-tA2	SINE	chr5	116347384	116351237
chr5	116407647	116407771	+	MIRc	SINE	chr5	116406421	116408904
chr5	116858595	116858667	+	Bov-tA3	SINE	chr5	116857859	116859234
chr6	6859780	6859969	-	Bov-tA3	SINE	chr6	6859487	6862902
chr6	11562943	11563436	-	ERV1-3-LTR_BT	LTR	chr6	11561729	11566847
chr6	12197743	12197825	-	Bov-tA2	SINE	chr6	12194110	12198262
chr6	19125025	19125093	-	Bov-tA1	SINE	chr6	19123726	19125875
chr6	19748046	19748744	+	L2b	LINE	chr6	19746526	19749532
chr6	22267270	22267430	-	Bov-tA3	SINE	chr6	22266685	22272705
chr6	22799248	22799563	+	MLT1I	LTR	chr6	22798601	22800580
chr6	30124227	30125289	-	BovB	LINE	chr6	30120346	30127266
chr6	32112756	32112893	-	Arthur1B	DNA	chr6	32111331	32113594
chr6	54514415	54514608	+	BovB	LINE	chr6	54512116	54515391
chr6	57469003	57469274	+	Bov-A2	SINE	chr6	57466236	57469512
chr6	58864444	58864523	-	Bov-A2	SINE	chr6	58863806	58865322
chr6	68352694	68353270	+	L2	LINE	chr6	68351665	68353622
chr6	84971743	84971943	+	Bov-tA2	SINE	chr6	84970365	84972751
chr6	86964393	86964583	-	Bov-tA2	SINE	chr6	86960845	86966150
chr6	95248811	95249082	-	Bov-A2	SINE	chr6	95248681	95249502
chr6	95575794	95576746	+	BovB	LINE	chr6	95575928	95577464
chr6	101789690	101790148	+	MLT1F1	LTR	chr6	101788683	101791769
chr6	101900791	101901122	-	Charlie19a	DNA	chr6	101899718	101902302
chr6	109024148	109024350	+	Bov-tA2	SINE	chr6	109023594	109024801
chr6	111476707	111477169	+	MLT1E3	LTR	chr6	111475941	111478626
chr6	114574884	114575314	-	MLT1K	LTR	chr6	114574491	114575838
chr6	117392758	117393066	+	Arthur1	DNA	chr6	117392000	117393823
chr7	9101233	9101458	-	MLT1D	LTR	chr7	9100915	9101880
chr7	11847347	11847713	+	MLT1A	LTR	chr7	11846864	11847986
chr7	15408703	15409013	+	MER77B	LTR	chr7	15408363	15409637
chr7	16162964	16163187	-	L3	LINE	chr7	16162462	16164012
chr7	17939349	17939717	+	ERV3-16A3_LTR	LTR	chr7	17938711	17941152
chr7	18175907	18176114	+	Bov-tA2	SINE	chr7	18175162	18177039
chr7	18719433	18719496	+	LTR10B_BT	LTR	chr7	18718922	18720374
chr7	19978130	19978343	+	Bov-tA2	SINE	chr7	19976846	19978833
chr7	22298414	22298622	-	Bov-tA2	SINE	chr7	22297265	22299108
chr7	25822719	25823403	-	L1MC5	LINE	chr7	25821277	25825829
chr7	27946215	27946467	+	BovB	LINE	chr7	27945069	27947318
chr7	45857179	45857383	-	Bov-tA2	SINE	chr7	45856261	45858038
chr7	49873809	49874005	+	Bov-tA2	SINE	chr7	49871369	49878963
chr7	50063343	50063944	-	L2a	LINE	chr7	50062802	50064222
chr7	50802724	50803373	-	HAL1	LINE	chr7	50801818	50803647
chr7	51427317	51427499	+	Bov-tA2	SINE	chr7	51426005	51428901
chr7	53163145	53163337	-	BovB	LINE	chr7	53161917	53164923
chr7	60533778	60534076	-	MLT1L	LTR	chr7	60532030	60534124
chr7	61069859	61069966	-	SINE2-2_BT	SINE	chr7	61069369	61070666
chr7	64555115	64555244	+	MIR3	SINE	chr7	64553925	64556040
chr7	65378279	65378476	-	Bov-tA1	SINE	chr7	65377960	65379558
chr7	70812747	70812878	+	L2a	LINE	chr7	70811313	70813575
chr7	80962578	80962835	-	X9_LINE	LINE	chr7	80962041	80963991
chr7	82387080	82387364	+	L2b	LINE	chr7	82386621	82388965
chr7	91726765	91726967	-	Bov-tA2	SINE	chr7	91725920	91728034
chr7	95381418	95381626	-	Bov-tA2	SINE	chr7	95381141	95382358
chr8	16164585	16164811	-	BovB	LINE	chr8	16164123	16166055
chr8	16850395	16850762	-	CHR-2A	SINE	chr8	16850545	16853972
chr8	22516653	22516829	-	MIRb	SINE	chr8	22514670	22517295
chr8	23541822	23542017	+	Bov-tA2	SINE	chr8	23541679	23542822
chr8	28801633	28801888	+	Bov-A2	SINE	chr8	28799002	28802717
chr8	37029618	37029756	+	BovB	LINE	chr8	37028817	37031232
chr8	39658169	39658240	+	Bov-tA2	SINE	chr8	39657441	39658894
chr8	40236570	40237128	+	MER119	DNA	chr8	40232397	40237953
chr8	45334078	45334307	+	LFSINE_Vert	SINE	chr8	45332662	45334644
chr8	46480055	46481359	+	BovB	LINE	chr8	46480704	46483222
chr8	49115336	49116638	-	BovB	LINE	chr8	49111872	49116036
chr8	51121067	51121286	+	Bov-A2	SINE	chr8	51120894	51122165
chr8	53741400	53741805	+	BovB	LINE	chr8	53740631	53742522
chr8	54361530	54361692	-	L2	LINE	chr8	54360371	54362203
chr8	57673299	57673380	-	MLT1H2	LTR	chr8	57672991	57674005
chr8	69249320	69249550	-	Bov-tA1	SINE	chr8	69248406	69249913
chr8	73613095	73613294	+	Bov-tA2	SINE	chr8	73612501	73613909
chr8	80946509	80947804	+	ERVL-int	LTR	chr8	80945711	80947968
chr8	81531295	81532281	-	BovB	LINE	chr8	81528461	81532227
chr8	84306450	84306517	+	Bov-tA3	SINE	chr8	84305777	84307664
chr8	85363142	85363293	+	L3	LINE	chr8	85362003	85364121
chr8	86984263	86984531	-	L1ME3G	LINE	chr8	86983892	86985389
chr8	89709866	89710537	+	MER77B	LTR	chr8	89709158	89710512
chr8	95049145	95049792	+	BovB	LINE	chr8	95049055	95050799
chr8	96783823	96784239	+	MLT1H	LTR	chr8	96782575	96787638
chr8	97434484	97434884	+	Charlie13a	DNA	chr8	97433457	97435698
chr8	99010253	99010354	-	MER5B	DNA	chr8	99010109	99011437
chr8	100898111	100898296	-	Bov-tA2	SINE	chr8	100895745	100900008
chr8	101562983	101563190	+	Bov-tA2	SINE	chr8	101562349	101564349
chr8	101577305	101577576	+	Charlie16	DNA	chr8	101575346	101579014
chr8	102018169	102018356	-	L2c	LINE	chr8	102017419	102021494
chr8	103324002	103324125	+	L2b	LINE	chr8	103323441	103327019
chr8	110157485	110157803	-	MamRep434	DNA	chr8	110156603	110159131
chr8	110238949	110239038	-	MIRb	SINE	chr8	110238554	110240165
chr9	19230583	19230806	+	Bov-A2	SINE	chr9	19229893	19232223
chr9	19295911	19295971	-	MER58B	DNA	chr9	19294757	19297433
chr9	19887745	19888327	-	ERV1-1-LTR_BT	LTR	chr9	19887731	19889298
chr9	29657863	29658249	+	ERVL-B4-int	LTR	chr9	29657086	29658529
chr9	32299392	32299600	-	Bov-tA2	SINE	chr9	32295705	32302481
chr9	32316794	32316861	+	Bov-tA3	SINE	chr9	32316021	32319696
chr9	34395898	34396005	+	L2d	LINE	chr9	34392201	34397417
chr9	40827764	40827887	+	MLT1F1	LTR	chr9	40825875	40828690
chr9	42289976	42290146	+	BovB	LINE	chr9	42288965	42290737
chr9	59687247	59687448	+	Bov-tA2	SINE	chr9	59686062	59688300
chr9	64137851	64137911	+	MIR3	SINE	chr9	64136378	64137995
chr9	76364433	76364586	-	Bov-tA2	SINE	chr9	76363062	76365471
chr9	76454756	76454880	+	MER5A	DNA	chr9	76454298	76455636
chr9	77628406	77628619	+	Bov-tA1	SINE	chr9	77627422	77629086
chr9	79644935	79645445	-	MLT1J	LTR	chr9	79643788	79646013
chr9	81502293	81502383	+	MamRep488	DNA	chr9	81501719	81502857
chr9	81869278	81869479	+	Bov-tA2	SINE	chr9	81867976	81869959
chr9	81869361	81869501	+	Bov-A2	SINE	chr9	81867976	81869959
chr9	86515244	86515402	+	MIR	SINE	chr9	86514139	86516440
chr9	86628245	86629426	+	L2a	LINE	chr9	86626641	86629694
chr9	86721239	86721483	+	L2c	LINE	chr9	86720615	86722646
chr9	88522465	88522737	+	Bov-A2	SINE	chr9	88521488	88522709
chr9	91510839	91511098	-	BovB	LINE	chr9	91509536	91512116
chr9	93074101	93074583	+	MLT1G1	LTR	chr9	93073797	93075674
chr9	94087991	94088176	+	BovB	LINE	chr9	94087057	94089924
chr9	94439478	94439683	-	Bov-tA2	SINE	chr9	94438472	94440625
chr9	104067867	104067983	-	BovB	LINE	chr9	104067118	104069818
chrX	7666265	7666475	-	MIRb	SINE	chrX	7665383	7667698
chrX	13923858	13924004	-	L2b	LINE	chrX	13922842	13924469
chrX	15941282	15947399	-	L1-3_BT	LINE	chrX	15945866	15949178
chrX	45757749	45758658	-	L1-3_BT	LINE	chrX	45757512	45758973
chrX	51414494	51414642	-	BovB	LINE	chrX	51411222	51416134
chrX	51480004	51480376	-	BovB	LINE	chrX	51477763	51482051
chrX	71226117	71226824	+	L1-3_BT	LINE	chrX	71225947	71227070
chrX	78647893	78648050	+	EUTREP16	LTR	chrX	78647027	78648352
chrX	82109228	82110186	-	L1-3_BT	LINE	chrX	82109113	82110433
chrX	96292869	96293524	+	L1_BT	LINE	chrX	96291777	96294172
chrX	97073037	97074051	-	L1-3_BT	LINE	chrX	97072506	97074266
chrX	102419487	102419673	+	Bov-tA2	SINE	chrX	102418718	102420784
chrX	105254333	105254801	+	MER68	LTR	chrX	105253374	105255943
chrX	110175797	110176006	+	Bov-tA1	SINE	chrX	110173553	110177440
chrX	120552598	120553110	+	LTR16E2	LTR	chrX	120552249	120553655
chrX	121353709	121354137	+	L1MB7	LINE	chrX	121349726	121356158
chrX	121364655	121364911	+	Charlie13b	DNA	chrX	121363781	121366388
chrX	125937448	125937651	+	L2b	LINE	chrX	125933496	125940431
chrX	126066751	126066817	-	L2c	LINE	chrX	126066189	126067992
chrX	132180547	132180761	-	Bov-tA1	SINE	chrX	132178303	132181699
chrX	138960852	138960967	+	SINE2-1_BT	SINE	chrX	138960028	138961724
