# Supplementary material for: Ruminant-specific retrotransposons shape regulatory evolution of bovine immunity
Source: HighWire-hosted journal article supplement (doi:10.1101/gr.276241.121), 2022-08-01
Supplement: Supplemental_Table_S8.xlsx [file Supplemental_Table_S8.xlsx]

## Sheet: Description
Supplemental Table S8
Family-level TE enrichment using GIGGLE.
Sheets
IFNG ATAC	Family-level TE enrichment over IFNG ATAC peaks
IFNG-inducible H3K27ac	Family-level TE enrichment over IFNG-inducible H3K27ac (FDR<0.05, log2 fold change>0) peaks
IFNG-downregulated H3K27ac	Family-level TE enrichment over IFNG-downregulated H3K27ac (FDR<0.05, log2 fold change<0) peaks
Nonresponsive H3K27ac	Family-level TE enrichment over nonresponsive H3K27ac (baseMean>100, FDR>0.90, abs(log2 fold change < 0.05)) peaks
IFNG-inducible POLR2A	Family-level TE enrichment over IFNG-inducible POL2RA (FDR<0.05, log2 fold change>0) peaks
IFNG-inducible STAT1	Family-level TE enrichment over IFNG-inducible STAT1 (FDR<0.05, log2 fold change>0) peaks
IFNG-inducible pSTAT1	Family-level TE enrichment over IFNG-inducible pSTAT1 (FDR<0.05, log2 fold change>0) peaks
Description of columns
TE family	TE family name
TE family size	Number of elements in TE family
Number of overlaps	Number of elements in TE family that overlap query peaks
Odds ratio	Odds ratio that estimates the enrichment of observed vs expected
Fisher's two tail	Fisher's two tail p-value estimate
Fisher's left tail	Fisher's left tail p-value estimate
Fisher's right tail	Fisher's right tail p-value estimate
Combo score	Score that incorporates the odds ratio and Fisher's two tailed tests

## Sheet: IFNG ATAC
TE family	TE family size	Number of overlaps	Odds ratio	Fisher's two tail	Fisher's left tail	Fisher's right tail	Combo score
Bov-A2	362131	18423	2.32491	5.95324e-200	1	3.54438e-200	242.492
Bov-tA2	537541	17138	1.3983	6.7275e-200	1	3.26414e-200	96.3338
LTR41	921	92	3.80342	1.86739e-24	1	1.86739e-24	45.7324
LTR41B	677	69	3.99589	9.37824e-20	1	9.37824e-20	38.0275
MamGypLTR3	367	41	4.89575	5.82981e-15	1	5.82981e-15	32.6184
MER91B	1047	74	3.42539	7.71569e-18	1	7.71569e-18	30.3966
LTR47_BT	356	41	4.58087	4.98191e-14	1	4.98191e-14	29.2075
MER41_BT	5491	293	2.01663	6.45585e-26	1	4.91053e-26	25.491
LTR41C	576	49	3.4935	1.74284e-12	1	1.74284e-12	21.2207
MIR3	62466	1943	1.40252	1.81331e-43	1	1.1729e-43	20.8589
AmnSINE1	1905	101	2.4792	1.02083e-14	1	7.00478e-15	18.3265
MLT1K	11666	492	1.63247	6.32199e-23	1	4.47162e-23	15.696
MLT1M	1203	73	2.59292	8.9521e-12	1	6.00422e-12	15.1864
MLT1F1	2761	156	2.03611	1.03017e-14	1	6.7411e-15	14.3481
MIR1_Amn	9606	334	1.60881	2.62056e-15	1	1.71866e-15	10.003
LTR11B_BT	840	67	2.28887	7.75745e-09	1	6.84586e-09	9.68885
LTR39_BT	2013	112	1.98913	1.79353e-10	1	1.47172e-10	9.66964
Chap1_Mam	231	19	3.57911	9.83035e-06	0.999997	9.83035e-06	9.21168
LTR50	2007	103	1.99249	1.03004e-09	1	6.92348e-10	8.93834
MARE8	138	12	4.42184	7.85691e-05	0.999983	7.85691e-05	8.80324
L2b	65106	2059	1.27549	3.50956e-25	1	2.05425e-25	8.58487
MER87A2_BT	151	13	3.30819	0.000589679	0.999828	0.000589679	5.57405
OldhAT-N1a	11	2	11.8168	0.0290628	0.997843	0.0290628	5.47478
MLT1J2	4591	184	1.59356	1.04686e-08	1	6.48735e-09	5.36467
MLT1H	7093	283	1.48756	9.87812e-10	1	5.62377e-10	5.15954
MLT1N2	3474	136	1.64207	1.97423e-07	1	1.21959e-07	4.79724
BTLTR1E1	92	10	3.31849	0.00284662	0.999182	0.00284662	4.40535
LTR108c_Mam	34	4	5.31135	0.0172946	0.996968	0.0172946	4.24501
MER77B	1073	58	1.8571	3.56267e-05	0.999986	2.62153e-05	3.9725
MER81	2544	91	1.68646	8.62724e-06	0.999997	5.3334e-06	3.81834
MLT1I	7424	264	1.40891	2.48992e-07	1	1.58118e-07	3.26613
MER63A	2204	86	1.63007	4.5053e-05	0.999981	3.14026e-05	3.06382
UCON35	120	7	3.13048	0.0169597	0.994875	0.0169597	2.91506
MamRTE1	6660	218	1.4186	1.96715e-06	0.999999	1.13248e-06	2.87855
MER95	19	2	6.30365	0.0849683	0.98784	0.0849683	2.84409
MER91C	990	38	1.88053	0.000831455	0.999742	0.000497459	2.80646
MamGypLTR3a	727	34	1.90516	0.00137583	0.999579	0.000825943	2.66089
Charlie13b	278	15	2.31412	0.00650908	0.99762	0.00575335	2.64665
LTR67B	2506	95	1.55109	0.000115214	0.999955	7.05265e-05	2.49418
Eulor6D	57	4	3.73607	0.049144	0.987775	0.049144	2.4882
ERV54-EC_LTR	1816	77	1.59478	0.000227392	0.999904	0.000156253	2.4532
MER133B	27	2	5.26894	0.113399	0.980389	0.113399	2.26658
MLT1H2	3483	127	1.462	0.000100195	0.999962	5.69304e-05	2.1913
Chompy-6_Croc	143	7	2.72807	0.0317617	0.989059	0.0317617	2.16906
BTLTR1F	415	33	1.8172	0.00326632	0.998794	0.00226856	2.14219
LTR45_BT	174	11	2.37031	0.0213926	0.99347	0.0163535	2.07895
MLT1F	3356	140	1.43278	0.000105272	0.999958	6.06223e-05	2.06369
LTR39A_BT	622	33	1.78543	0.00368882	0.998536	0.00270507	2.03475
MLT1L	7677	261	1.33499	1.47883e-05	0.999994	8.17677e-06	2.01334
UCON81	31	2	4.76174	0.13315	0.974527	0.13315	1.97154
LTR16D1	175	10	2.35108	0.031013	0.990655	0.0232972	1.86042
CR1-L3B_Croc	31	2	4.55142	0.14297	0.971468	0.14297	1.8469
LTR45	11	1	7.34545	0.23583	0.972239	0.23583	1.80494
MER5A	27050	747	1.2129	5.34584e-07	1	3.07318e-07	1.74649
HERVL40-int	827	41	1.65416	0.0048193	0.99819	0.00309281	1.68238
Chap1a_Mam	903	35	1.68931	0.00617346	0.997461	0.00444187	1.67132
LTR40c	435	22	1.85573	0.0139594	0.99507	0.00956145	1.65476
MER117	2617	87	1.47204	0.00108335	0.999565	0.000654067	1.65406
MER68	1226	57	1.5639	0.00273748	0.998947	0.0016935	1.6533
MIRc	76415	1995	1.1444	8.89552e-09	1	4.66869e-09	1.56665
UCON80	32	2	4.06214	0.170363	0.962162	0.170363	1.55435
X12_DNA	856	33	1.68544	0.00941123	0.996628	0.00589638	1.5261
MER99	182	10	2.15321	0.0432123	0.983374	0.0382056	1.50968
MER125	128	6	2.44983	0.0724689	0.972619	0.0724689	1.47346
MLT1J	10243	343	1.26267	5.16281e-05	0.999978	2.85147e-05	1.4425
MLT1J1	3597	123	1.37972	0.000957337	0.999559	0.000620074	1.40193
MER90	520	25	1.73781	0.0180197	0.993406	0.0119772	1.39064
MamSINE1	3612	113	1.3898	0.00122865	0.999442	0.000791382	1.38217
BTLTR1B	1609	139	1.36524	0.000996843	0.999601	0.000555678	1.34808
MER91A	2243	73	1.45865	0.00361984	0.998558	0.00215768	1.32962
LTR16A1	2048	78	1.44187	0.00330588	0.998581	0.00209786	1.30967
ARLTR2	15	1	5.45539	0.30386	0.951354	0.30386	1.26625
MER20	13677	410	1.23209	6.64034e-05	0.99997	3.71988e-05	1.25799
MER77	1065	47	1.52761	0.0089531	0.996008	0.00630767	1.25191
AmnHarb1	97	5	2.43332	0.106911	0.959799	0.106911	1.24569
Tigger21a	133	7	2.24817	0.0979402	0.970141	0.0726032	1.17932
LTR32_BT	1446	58	1.47788	0.00816354	0.996868	0.00477247	1.17672
EuthAT-N1a	38	2	3.4038	0.221198	0.941868	0.221198	1.15787
X21_LINE	39	2	3.1093	0.251457	0.928219	0.251457	0.981194
CR1-3_Croc	711	25	1.59462	0.0444932	0.982957	0.0285783	0.909982
Tigger12A	454	17	1.68722	0.0630909	0.973957	0.0466974	0.905606
LTR39B_BT	1820	78	1.3721	0.0111481	0.995209	0.00676603	0.891228
LTR33A	1606	59	1.39655	0.0205533	0.991236	0.0126667	0.812973
AmnSINE2	534	18	1.63557	0.0742734	0.970441	0.0513908	0.801478
MER119	986	38	1.45292	0.0402375	0.982789	0.0261375	0.752046
MER76-int	147	8	1.88013	0.15863	0.943799	0.115619	0.728314
X17_LINE	766	25	1.51142	0.0679655	0.970347	0.0473722	0.695841
MLT1A0-int	325	16	1.64209	0.112928	0.962869	0.0652525	0.677748
LTR16B2	1076	42	1.41235	0.043811	0.980397	0.0289236	0.676628
LTR52-int	156	8	1.81049	0.170873	0.932729	0.133788	0.657125
ERV2-3-I_BT	196	16	1.60792	0.115153	0.955375	0.0772911	0.64321
Eulor6E	24	1	3.4429	0.436727	0.890485	0.436727	0.641732
EuthAT-N1	48	2	2.51987	0.33308	0.88476	0.33308	0.63661
MLT1G	2205	82	1.31363	0.0256955	0.989472	0.0142668	0.625816
EUTREP16	245	9	1.76509	0.196072	0.936292	0.122725	0.580033
MER63B	2067	66	1.32875	0.0388016	0.984397	0.0214806	0.578664
MARE6	113	5	1.90402	0.252791	0.900347	0.212861	0.554866
Eutr2	25	1	3.10691	0.470373	0.870565	0.470373	0.535715
LFSINE_Vert	1892	56	1.33571	0.0529407	0.978232	0.0302507	0.532961
L3b	6997	198	1.20974	0.0116576	0.994571	0.00669985	0.531092
MLT1O	2812	87	1.27908	0.0330864	0.984455	0.0205259	0.525689
OldhAT1	3541	96	1.26585	0.0327955	0.985228	0.0192737	0.504773
MIRb	166108	4229	1.07313	1.15563e-05	0.999994	6.07328e-06	0.502724
LTR75B	150	7	1.72487	0.240084	0.901138	0.189898	0.487337
Zaphod2	542	20	1.46281	0.141611	0.939479	0.0949042	0.465825
MamRep488	268	9	1.63143	0.221545	0.906138	0.16877	0.462196
Kanga1b	296	12	1.59512	0.210326	0.927382	0.126111	0.456145
X6a_DNA	607	20	1.45385	0.143944	0.936656	0.0987605	0.454475
Charlie17a	592	19	1.45325	0.171385	0.931358	0.107239	0.413107
LTR6B_BT	364	14	1.50191	0.199559	0.91575	0.137685	0.410718
MLT1B-int	330	14	1.49785	0.200346	0.91419	0.139987	0.406989
MER57LA	1149	39	1.33778	0.115089	0.953843	0.0650468	0.394219
X5a_DNA	249	8	1.6192	0.280379	0.888921	0.199818	0.383971
MLT1G1	2553	90	1.2326	0.0676273	0.969022	0.0395464	0.352963
LTR53	365	15	1.4447	0.223903	0.901717	0.154843	0.344967
MLT1H1	2668	92	1.22548	0.0715596	0.966872	0.0420484	0.335977
ORSL-2a	249	9	1.57507	0.30959	0.889305	0.193249	0.333748
MER133A	38	1	2.44618	0.554668	0.80944	0.554668	0.330332
UCON34	222	7	1.61977	0.355623	0.87287	0.230675	0.312416
MER102c	1830	55	1.26093	0.128716	0.94612	0.0712064	0.297817
MamTip2b	3890	107	1.20221	0.0783814	0.964412	0.0442281	0.293801
BTLTR1E2	66	3	1.87053	0.474373	0.834947	0.360111	0.292608
MLT1K-int	84	3	1.84222	0.480292	0.827965	0.368972	0.280736
MER67B	369	14	1.4105	0.27746	0.877992	0.189038	0.276289
Tigger16a	1175	36	1.29699	0.184148	0.926034	0.101773	0.275687
MER5A1	12394	320	1.13287	0.0353798	0.98397	0.0184957	0.261196
UCON97	39	1	2.18864	0.594759	0.775558	0.594759	0.255003
MamRTE2	38	1	2.16194	0.59909	0.771793	0.59909	0.247502
MER76	571	22	1.33667	0.269631	0.893533	0.153842	0.238307
LTR33	6346	193	1.14548	0.0797948	0.964176	0.0421114	0.215158
MER68-int	194	8	1.46389	0.410629	0.831878	0.278561	0.212527
MER96	823	23	1.30921	0.28656	0.882242	0.166662	0.210979
LTR31B_BT	615	23	1.30439	0.286388	0.878493	0.171605	0.208189
MER112	2787	79	1.19463	0.154946	0.932051	0.0847007	0.207768
UCON55	203	6	1.54725	0.468663	0.828723	0.30212	0.20726
Bov-tA3	345315	7768	1.04326	0.000426496	0.999792	0.000217356	0.20592
MARE10	58	2	2.13899	0.651525	0.837023	0.407353	0.204104
LTR101_Mam	673	23	1.29511	0.289387	0.872162	0.179419	0.200909
MER135	539	15	1.35698	0.374398	0.858238	0.21154	0.187904
MER5B	19003	469	1.10007	0.047322	0.976902	0.0258242	0.182306
LTR33A_	1245	41	1.22649	0.259847	0.8879	0.146347	0.172388
MamRep38	1240	36	1.23208	0.268207	0.877337	0.161599	0.172082
Charlie13a	436	16	1.3232	0.393594	0.845069	0.225866	0.163614
MER89	1227	41	1.21355	0.26374	0.875297	0.161377	0.161629
LTR86B1	214	7	1.44892	0.512501	0.80771	0.318303	0.155307
Charlie7b_Mars	59	2	1.86503	0.674234	0.786859	0.475149	0.153934
ERV2-2B_BT-LTR	168	7	1.42286	0.516383	0.795507	0.334315	0.146037
UCON4	141	4	1.51087	0.575957	0.763729	0.420921	0.142658
ERV3-16A3_LTR	844	27	1.2313	0.340467	0.839717	0.214004	0.140461
MamGypsy2-LTR	512	14	1.30387	0.453695	0.814455	0.269095	0.131391
LTR45C	70	2	1.74909	0.688033	0.758794	0.508749	0.130985
MER74A	1374	48	1.1904	0.303523	0.869779	0.164791	0.130199
MER21C	7201	245	1.10817	0.133674	0.938032	0.0704574	0.129502
Plat_L3	2036	57	1.17562	0.279707	0.873927	0.156781	0.129153
UCON39	75	2	1.72858	0.690853	0.753167	0.515103	0.126819
LTR81	229	7	1.37396	0.529363	0.769453	0.36559	0.126615
MLT2B4	3197	101	1.14149	0.217803	0.895997	0.123842	0.126373
X12_LINE	190	5	1.43012	0.61703	0.756072	0.408866	0.10823
MER45C	869	28	1.20343	0.408642	0.815641	0.241209	0.103833
BtERVF2_LTR	232	9	1.34381	0.572682	0.783905	0.331258	0.103208
LTR1_BT	3520	123	1.11872	0.247335	0.880975	0.138613	0.0981952
MER102a	2152	60	1.14985	0.330876	0.844644	0.189356	0.0967621
LTR18C_BT	70	2	1.5674	0.713985	0.70703	0.566688	0.0948647
MER20B	2830	84	1.1242	0.322452	0.844166	0.184293	0.0830166
LTR13B_BT	1512	48	1.15061	0.392953	0.816924	0.225329	0.0821062
X13_LINE	103	3	1.54011	0.745885	0.741028	0.478972	0.0793293
MLT2E	338	10	1.27544	0.602543	0.750399	0.363882	0.0772232
MER94	3024	74	1.12218	0.386333	0.824638	0.207941	0.0686896
EUTREP7	202	6	1.29935	0.662962	0.706567	0.450771	0.0674404
MamTip3B	540	15	1.21406	0.57602	0.74777	0.344312	0.0670381
Tigger19a	2337	61	1.12485	0.413656	0.804916	0.233457	0.0650705
MER31_BT	321	11	1.22393	0.6265	0.720195	0.392889	0.0592028
Charlie9	827	22	1.17808	0.565797	0.755932	0.317986	0.0584816
MamRep1879	811	21	1.17103	0.559701	0.741811	0.335712	0.0574115
CHR-1	132	3	1.38349	0.765521	0.676244	0.549736	0.0543449
UCON73	158	4	1.4131	0.783166	0.721496	0.470312	0.0529528
BtERVF1_LTR	364	13	1.21171	0.652087	0.72855	0.373973	0.0514464
X9a_DNA	443	12	1.20202	0.644074	0.709839	0.398952	0.0507202
UCON37	124	3	1.35014	0.770486	0.660883	0.565777	0.0490434
Charlie32a	156	4	1.37917	0.786112	0.705239	0.488619	0.0484743
UCON58	123	3	1.34262	0.771676	0.657283	0.569465	0.0478456
LTR39C2_BT	1004	32	1.13821	0.571214	0.747452	0.314132	0.0454223
MER45A	2712	69	1.10382	0.484358	0.778546	0.259878	0.0448654
UCON78	153	4	1.35035	0.788973	0.690711	0.504635	0.0446069
Tigger12c	518	14	1.18774	0.66774	0.713172	0.38675	0.043536
Tigger6a	475	20	1.15981	0.631087	0.722375	0.360092	0.042759
UCON29	183	5	1.31188	0.809575	0.69374	0.480447	0.03593
L1M6B	336	9	1.19586	0.726102	0.67301	0.457246	0.0358699
BTLTR1J4	148	5	1.29447	0.810519	0.684192	0.491463	0.0339727
EUTREP8	166	4	1.26019	0.800703	0.63979	0.557898	0.0322064
X30_DNA	461	12	1.18725	0.758075	0.695446	0.4148	0.0297868
LTR39D_BT	1403	47	1.09399	0.645009	0.712924	0.340159	0.0246805
MamRep1894	297	7	1.23628	0.840494	0.679354	0.468101	0.0230924
MER63D	1914	49	1.08506	0.654281	0.698562	0.354135	0.0216973
LTR16C	4655	132	1.05575	0.587658	0.720995	0.30966	0.0180706
LTR83	527	15	1.12212	0.787781	0.645292	0.456597	0.0172202
FordPrefect	485	17	1.10428	0.800802	0.633195	0.463296	0.0138063
LTR16	2277	66	1.05948	0.701965	0.664981	0.381955	0.0128113
X9_LINE	538	12	1.10647	0.882224	0.60684	0.508475	0.00794346
MamGypLTR1d	424	11	1.10138	0.877971	0.594692	0.526178	0.00787388
LTR16B1	897	27	1.07456	0.841968	0.623881	0.452505	0.00775019
MamTip2	3091	72	1.04475	0.762294	0.630037	0.416001	0.00744549
MLT1G3	2427	72	1.04266	0.808142	0.623737	0.422639	0.00557619
L5	503	13	1.07708	0.888593	0.576132	0.53526	0.0054954
Charlie20a	592	16	1.07715	0.898209	0.58993	0.510478	0.00499884
LTR16D	714	19	1.08202	0.905781	0.609289	0.482371	0.00488778
LTR16E2	1483	41	1.03075	0.936601	0.558649	0.504359	0.00124297
ALTR2B_BT	2948	85	1.01522	0.955993	0.542378	0.50148	0.000425894
BTLTR1J2	31	1	1.82939	1	0.714837	0.658507	0
Charlie12	3	0	12.0145	1	0.940086	1	0
Charlie29a	609	17	1.00801	1	0.486092	0.609743	0
Charlie30b	396	9	1.02357	1	0.491452	0.638087	0
CR1-11_Crp	36	0	1.15906	1	0.436133	1	0
CR1-12_AMi	102	2	1.12082	1	0.508032	0.743019	0
CR1-13_AMi	69	1	1.15681	1	0.494756	0.818698	0
CR1-1_Amn	43	1	1.87741	1	0.721053	0.650874	0
CR1-L3A_Croc	173	3	1.01724	1	0.453467	0.748463	0
Eulor6A	24	0	1.66032	1	0.564765	1	0
Eulor6B	58	1	1.37631	1	0.583988	0.761946	0
Eulor6C	18	0	2.32015	1	0.667806	1	0
Eulor9B	27	0	1.59188	1	0.549329	1	0
hAT-N1a_Mam	322	8	1.12085	1	0.591981	0.549377	0
hAT-N1_Mam	142	3	1.11407	1	0.52425	0.691975	0
L2-1_Crp	25	0	1.5758	1	0.547244	1	0
Looper	437	13	1.00552	1	0.477643	0.630866	0
LTR108a_Mam	60	1	1.17911	1	0.506204	0.812254	0
LTR16B	558	15	1.01607	1	0.495986	0.606194	0
LTR16D2	207	5	1.06367	1	0.511071	0.660642	0
LTR2B_BT	340	13	1.02026	1	0.50021	0.610064	0
LTR46_BT	183	6	1.13016	1	0.581224	0.581774	0
LTR58	3	0	11.5394	1	0.937723	1	0
LTR65	341	9	1.04029	1	0.512031	0.619167	0
LTR69	1	0	22.1726	1	0.977947	1	0
LTR6_BT	169	4	1.06369	1	0.501486	0.686681	0
LTR73	1	0	22.75	1	0.978495	1	0
LTR75	180	5	1.13236	1	0.569649	0.60711	0
LTR77	21	0	2.02004	1	0.626693	1	0
LTR90A	252	6	1.12893	1	0.578501	0.583674	0
MamGypLTR1b	702	17	1.00898	1	0.487153	0.608549	0
MamTip1	459	11	1.06244	1	0.547519	0.572938	0
MER121B	55	1	1.44521	1	0.607729	0.745069	0
MER132	36	0	1.17832	1	0.44202	1	0
MER134	69	1	1.22674	1	0.52505	0.800388	0
MER136	26	0	1.43634	1	0.515855	1	0
MER21B	1128	31	1.01892	1	0.521016	0.551297	0
MER68B	372	10	0.999508	1	0.464609	0.656838	0
MER68C	117	3	1.24309	1	0.605384	0.620316	0
MER70C	291	8	1.05402	1	0.522948	0.616484	0
MER83A-int	20	0	1.88337	1	0.6069	1	0
MER83B-int	44	0	0.994582	1	0.37822	1	0
MER92C	126	3	1.06553	1	0.491457	0.71927	0
MLT1A-int	315	9	1.00315	1	0.467827	0.660081	0
MLT1E1-int	25	0	1.28991	1	0.479732	1	0
MLT1E-int	20	0	1.37404	1	0.505916	1	0
MLT1G3-int	201	6	1.05336	1	0.510641	0.647892	0
MLT1M-int	1	0	21.8163	1	0.977595	1	0
MLT1N2-int	24	0	1.49792	1	0.531274	1	0
MLT1O-int	4	0	7.46229	1	0.89961	1	0
Oamar1	26	0	1.15715	1	0.440809	1	0
OldhAT-N1b	10	0	3.8915	1	0.793801	1	0
OldhAT-N1c	1	0	23.447	1	0.979121	1	0
Tigger14a	788	18	1.0298	1	0.522887	0.571347	0
Tigger17	71	2	1.36693	1	0.633251	0.639627	0
Tigger17c	311	8	1.03245	1	0.498678	0.63894	0
Tigger2a	6	0	6.22212	1	0.872668	1	0
Tigger2a_Car	87	1	1.01906	1	0.425405	0.856409	0
Tigger6	224	6	1.14586	1	0.593478	0.569257	0
UCON11	47	1	1.62649	1	0.662331	0.702944	0
UCON15	40	0	0.997224	1	0.380393	1	0
UCON40	157	3	1.00128	1	0.441954	0.757412	0
UCON8	160	3	1.00129	1	0.441824	0.757474	0
X10b_DNA	146	3	1.21538	1	0.588027	0.635859	0
X11_DNA	159	3	1.00222	1	0.442584	0.756911	0
X15_LINE	181	3	1.00526	1	0.444023	0.755589	0
X1_LR	14	0	2.87799	1	0.725713	1	0
X23_DNA	58	1	1.36992	1	0.58174	0.763516	0
X24_LINE	449	10	1.09131	1	0.576031	0.550482	0
X2_LINE	150	3	1.03591	1	0.468483	0.737105	0
X34_DNA	67	1	1.28614	1	0.549251	0.785034	0
X7D_LINE	25	0	1.8014	1	0.589693	1	0
Zaphod5a	54	1	1.38068	1	0.586273	0.760566	0
Zaphod5b	45	1	1.81974	1	0.708672	0.662387	0
LTR9B_EC	383	11	0.996985	0.883795	0.462963	0.653203	-0.000233685
MamGypLTR2c	560	13	0.993657	0.892659	0.459145	0.64771	-0.000452692
X7C_LINE	398	8	0.992689	0.866727	0.451559	0.681079	-0.000657611
LTR86C	264	6	0.990525	0.84898	0.445891	0.704279	-0.00097662
MamGypLTR4	432	10	0.987937	0.879102	0.448766	0.670956	-0.000979811
Tigger17d	386	9	0.982755	0.873322	0.441369	0.683454	-0.00147626
Charlie30a	295	6	0.980191	0.849282	0.434442	0.713802	-0.00204792
X1_DNA	471	11	0.969267	0.884632	0.423791	0.688274	-0.0023975
MLT1E1	1034	27	0.976556	0.849553	0.428829	0.645195	-0.0024235
LTR79	2365	57	0.976319	0.843426	0.41307	0.637895	-0.00255701
MER105	573	12	0.963451	0.889591	0.414413	0.692151	-0.00272937
L2-2_Mam	364	7	0.966652	0.859295	0.420188	0.716206	-0.00322248
MLT1F-int	401	11	0.958046	0.884845	0.409034	0.701573	-0.00328538
Eulor11	82	1	0.981784	0.725982	0.40604	0.866308	-0.00368859
LTR109A2	74	1	0.981528	0.725622	0.406975	0.866023	-0.00374664
hAT-4b_Ther	155	3	0.973091	0.802139	0.42003	0.773773	-0.00376804
MER4B-int	350	8	0.956958	0.867371	0.409408	0.717883	-0.0039223
LTR72_BT	1151	30	0.959909	0.788327	0.390349	0.677654	-0.00609748
MER94B	344	6	0.936706	0.851302	0.38708	0.752618	-0.00659537
LTR33B	1015	24	0.957706	0.765962	0.392139	0.683463	-0.00721909
MER21C_BT	3303	94	0.965247	0.719719	0.355306	0.682586	-0.00728894
MARE4	196	3	0.934543	0.803897	0.387236	0.79698	-0.00925878
X33a_DNA	76	1	0.952812	0.725828	0.39083	0.873888	-0.0097049
MLT1F1-int	164	4	0.914267	0.824406	0.371552	0.789991	-0.010844
LTR75_1	43	0	0.963141	0.627797	0.366821	1	-0.0109544
MER70-int	79	1	0.944852	0.726102	0.385937	0.876173	-0.011376
MamRep4096	814	18	0.93906	0.734716	0.366383	0.717384	-0.0121444
MER74B	700	18	0.937341	0.734244	0.364087	0.719582	-0.0125243
Tigger15a	2999	71	0.950767	0.641037	0.32232	0.719078	-0.014066
BTLTR1E	123	3	0.900151	0.804449	0.362646	0.814846	-0.0143416
UCON59	45	0	0.945675	0.628001	0.359607	1	-0.0162812
L2-1_AMi	394	8	0.91247	0.744683	0.354062	0.763831	-0.0169191
ERV2-3-LTR_BT	209	6	0.92081	0.711145	0.373222	0.764491	-0.0176205
MARNA	2023	47	0.938056	0.619679	0.313951	0.735732	-0.0191736
UCON38	141	2	0.878299	0.778082	0.344672	0.851641	-0.0204018
Zaphod4a	273	6	0.904	0.712963	0.352668	0.78017	-0.0213943
L1MEa	282	7	0.891025	0.731077	0.333965	0.786861	-0.0226451
Eulor9A	93	1	0.889513	0.728871	0.352222	0.891572	-0.0231999
LTR81A	506	11	0.906892	0.674378	0.335521	0.764242	-0.0241241
Eutr2B	41	0	0.912611	0.627902	0.347863	1	-0.0266636
Tigger10	1003	23	0.914036	0.619795	0.308096	0.760399	-0.0269407
LTR82B	869	21	0.909976	0.605099	0.306586	0.764644	-0.0296932
LTR10_EC	399	10	0.890962	0.661814	0.31872	0.782374	-0.0298588
EutTc1-N1	42	0	0.902313	0.62824	0.343431	1	-0.0299381
X2b_DNA	105	1	0.857094	0.73177	0.331578	0.900531	-0.0301733
Charlie10a	231	4	0.883766	0.668069	0.340212	0.812085	-0.0312281
LTR16A2	1402	34	0.910493	0.565521	0.272504	0.780953	-0.0334888
UCON44	227	4	0.86899	0.66885	0.326296	0.821908	-0.0353864
CR1_Mam	1062	24	0.901222	0.562471	0.28056	0.783108	-0.0374962
LTR78	2866	72	0.91757	0.458581	0.220834	0.812424	-0.0420216
X4b_DNA	424	8	0.862055	0.634536	0.291145	0.813496	-0.0423037
MLT1D-int	424	12	0.876083	0.594231	0.288535	0.799629	-0.0431431
LTR53B	148	3	0.848193	0.635044	0.316513	0.844963	-0.0468412
Tigger17a	1813	53	0.905768	0.467224	0.221816	0.816711	-0.0471873
X5B_LINE	55	0	0.844877	0.632048	0.316526	1	-0.0484551
MLT1H-int	643	16	0.874101	0.562032	0.26463	0.808993	-0.0485786
MER92A	177	3	0.836474	0.637056	0.304822	0.852127	-0.0504452
BTLTR1E3	36	0	0.836769	0.62975	0.31842	1	-0.0516337
Charlie10b	197	3	0.832317	0.638066	0.300408	0.854769	-0.0516707
MamGypLTR1a	665	14	0.873845	0.539369	0.273037	0.806373	-0.0521617
LTR16E1	1786	42	0.897202	0.462471	0.223793	0.819189	-0.0524129
Tigger16b	893	17	0.876428	0.502618	0.262353	0.808745	-0.0568522
LTR108b_Mam	41	0	0.819081	0.631877	0.308877	1	-0.0574024
hAT-1_Mam	988	23	0.876878	0.495255	0.239244	0.819571	-0.0578457
MER90a	1089	27	0.884268	0.469427	0.238928	0.815833	-0.0582784
Tigger19b	2496	51	0.895952	0.423966	0.200731	0.835851	-0.0590705
MER92B	558	13	0.856701	0.527099	0.253635	0.824624	-0.0620557
MLT1H1-int	223	5	0.824846	0.56668	0.275369	0.846221	-0.0685235
ERVL-B4-int	2641	81	0.90271	0.335292	0.169067	0.857399	-0.0700783
LTR71_BT	141	2	0.807355	0.592404	0.29102	0.881995	-0.0701985
BTLTR1J3	41	0	0.779596	0.635251	0.291293	1	-0.0707823
LTR84b	692	15	0.852048	0.480059	0.234972	0.834958	-0.0736186
LTR81AB	153	2	0.781982	0.595809	0.270734	0.892722	-0.0797902
MER127	157	2	0.758069	0.600162	0.251909	0.902422	-0.0886034
Charlie31a	467	9	0.830507	0.464437	0.24453	0.844229	-0.0892425
LTR11_BT	1963	48	0.874749	0.34071	0.162031	0.870484	-0.090277
LTR16A	3149	77	0.887752	0.277827	0.137667	0.885675	-0.0955435
BTLTR1D	38	0	0.688481	0.647326	0.249199	1	-0.101712
Tigger6b	186	3	0.792023	0.496855	0.265644	0.876124	-0.102184
UCON33	98	1	0.776399	0.524437	0.281263	0.921347	-0.102348
LTR106_Mam	447	9	0.803389	0.467285	0.211466	0.868634	-0.104356
FordPrefect_a	192	3	0.78732	0.497182	0.261289	0.878681	-0.104696
LTR86A1	328	6	0.785861	0.49061	0.221673	0.875182	-0.107517
AmnL2-1	1372	24	0.842559	0.351564	0.175541	0.871026	-0.112205
LTR7_BT	141	3	0.773061	0.495607	0.251518	0.88483	-0.113209
Charlie17b	379	8	0.797678	0.445114	0.214379	0.870398	-0.114641
X6A_LINE	950	17	0.824111	0.38341	0.181676	0.87361	-0.116195
Arthur1A	784	14	0.813494	0.405668	0.185276	0.875511	-0.116686
LTR10B_BT	3764	91	0.883152	0.213192	0.109241	0.908971	-0.120329
MLT2F	1455	35	0.839784	0.275442	0.133086	0.899281	-0.141062
LTR86A2	248	4	0.764562	0.425724	0.225919	0.887685	-0.143637
MLT1F2	4584	120	0.880735	0.151688	0.0760949	0.936047	-0.150066
X26_DNA	587	11	0.788089	0.359601	0.175287	0.889051	-0.152606
MER21-int	490	11	0.78626	0.358415	0.174102	0.89003	-0.154594
MamTip3	695	13	0.798449	0.331562	0.172732	0.886782	-0.155686
BTLTR1D2	538	15	0.789492	0.304271	0.149977	0.900737	-0.176209
MER113	2460	54	0.84429	0.185945	0.0943308	0.926196	-0.178409
MamRep137	1439	29	0.816707	0.239692	0.117521	0.914326	-0.181209
ORSL	937	17	0.792626	0.285123	0.13923	0.906069	-0.182721
Charlie16	971	20	0.796683	0.274046	0.128709	0.911222	-0.184351
Charlie8	3102	68	0.850767	0.158428	0.0811673	0.935297	-0.18657
MamRep1527	852	17	0.786281	0.285618	0.131734	0.911706	-0.188778
Tigger12	596	11	0.772675	0.301513	0.156978	0.902163	-0.193733
ERV1-3-LTR_BT	2373	59	0.839009	0.165392	0.0781921	0.938847	-0.197905
MER45R	573	11	0.764653	0.301887	0.14802	0.908508	-0.201364
Charlie26a	338	5	0.720782	0.372767	0.16866	0.914879	-0.202439
LTR9_BT	435	9	0.746543	0.325351	0.14711	0.91368	-0.205643
LTR73_BT	335	6	0.738859	0.320999	0.172994	0.907084	-0.215475
L1M3e	291	6	0.737209	0.319944	0.172279	0.907647	-0.217695
X32_DNA	235	3	0.680083	0.393003	0.167919	0.930172	-0.225604
Tigger9a	753	14	0.770967	0.249282	0.132163	0.914883	-0.226397
MER97c	185	3	0.677796	0.391286	0.167625	0.930493	-0.228642
BTLTR1J1	48	0	0.65888	0.40589	0.231267	1	-0.235704
X4a_DNA	121	1	0.674092	0.376951	0.211581	0.946664	-0.241086
MER97d	94	1	0.673107	0.375243	0.213058	0.946351	-0.243107
ERV2-2-LTR_BT	87	1	0.671114	0.374623	0.212485	0.946614	-0.245341
MLT1E3-int	46	0	0.64091	0.406103	0.222623	1	-0.25118
LTR5_BT	936	18	0.767892	0.218148	0.104455	0.930862	-0.251952
X20_LINE	121	1	0.648593	0.378146	0.194376	0.952401	-0.2638
MLT1L-int	54	0	0.624381	0.408699	0.212249	1	-0.264052
LTR18B_BT	435	9	0.724677	0.267952	0.124839	0.928461	-0.265718
Charlie1	1469	36	0.796957	0.15398	0.072099	0.947624	-0.266045
MLT1C-int	97	1	0.637735	0.37736	0.188871	0.954336	-0.274672
Eulor1	65	0	0.608429	0.412088	0.202132	1	-0.27599
MER121	782	14	0.74761	0.210608	0.106425	0.933136	-0.283899
X2a_DNA	264	3	0.672429	0.297349	0.161002	0.933627	-0.30158
LTR108e_Mam	115	1	0.603304	0.385631	0.164301	0.961924	-0.301698
MLT1G-int	148	2	0.640075	0.336634	0.1612	0.945053	-0.304363
LTR73B_BT	167	2	0.631852	0.339393	0.154206	0.947957	-0.310835
LTR9A_EC	422	8	0.698101	0.251156	0.109912	0.940148	-0.311124
ERV1-1B-LTR_BT	4192	101	0.834937	0.0588834	0.0300482	0.976025	-0.320123
Charlie19a	1086	19	0.747399	0.167359	0.0779764	0.949221	-0.326106
ALTR2B1_BT	4908	124	0.841073	0.0493234	0.0233911	0.981084	-0.32634
MER115	1704	36	0.781743	0.119417	0.0560059	0.959965	-0.327857
MLT1J1-int	337	6	0.674695	0.261722	0.113611	0.943208	-0.330488
Tigger20a	863	16	0.736956	0.167195	0.0837154	0.94715	-0.342054
MER34-int	622	12	0.719121	0.185639	0.0931548	0.944487	-0.347889
LTR2C_BT	181	4	0.65813	0.258991	0.13347	0.940927	-0.354116
Charlie4	870	15	0.730314	0.15766	0.0830574	0.948357	-0.363763
MLT2C2	1091	21	0.744876	0.133235	0.0672179	0.955904	-0.371975
L1M3a	545	11	0.708657	0.17203	0.0916545	0.94672	-0.379783
ERVL-int	622	13	0.714483	0.164721	0.0822575	0.950702	-0.379898
Tigger23a	370	5	0.652246	0.235216	0.108474	0.949412	-0.387498
Tigger8	645	11	0.697332	0.174335	0.0812225	0.953397	-0.394543
Charlie10	1009	20	0.730102	0.126952	0.0588337	0.962235	-0.406795
Penelope1_Vert	975	14	0.708442	0.149642	0.0695384	0.958197	-0.410229
Charlie25	814	18	0.720845	0.133703	0.0603027	0.962131	-0.41267
MER102b	1949	37	0.76776	0.0825408	0.0416808	0.970602	-0.413045
Arthur2	753	14	0.705719	0.148518	0.068153	0.959171	-0.416458
MER126	199	2	0.614435	0.250056	0.140359	0.953647	-0.42298
ALTR39_BT	2349	58	0.786753	0.0517785	0.0269896	0.980039	-0.444926
MERX	247	3	0.611564	0.227299	0.114089	0.956357	-0.456445
CR1-16_AMi	250	3	0.609595	0.227633	0.112593	0.957039	-0.458982
CHR-2A	30203	732	0.890512	0.00155696	0.000794225	0.999301	-0.469714
MER130	134	1	0.562813	0.271241	0.136513	0.970021	-0.469904
MER110A	500	8	0.659029	0.16465	0.0770687	0.959955	-0.471305
LTR18A_BT	676	14	0.699029	0.121858	0.0633248	0.96237	-0.472226
LTR107_Mam	308	4	0.619769	0.204871	0.100297	0.957665	-0.475214
MLT1H2-int	247	4	0.617438	0.203383	0.0997077	0.958051	-0.48116
ORSL-2b	554	9	0.6704	0.145801	0.0762562	0.958975	-0.482431
BTLTR1C	251	8	0.657979	0.1579	0.0801211	0.958468	-0.484086
MamGypsy2-I	1633	33	0.747151	0.0695693	0.0349059	0.976144	-0.486796
MER45B	1060	23	0.72089	0.0914685	0.0418305	0.973081	-0.490435
MLT1I-int	510	9	0.659954	0.146329	0.0688399	0.963448	-0.500438
LTR3_BT	105	1	0.538124	0.273339	0.122306	0.974069	-0.503584
LTR40A1	404	6	0.638661	0.163811	0.0842816	0.959698	-0.508225
ERVL-E-int	5269	137	0.820352	0.0163806	0.0083799	0.993352	-0.510139
LTR33C	758	13	0.684099	0.113768	0.0575212	0.966747	-0.517039
Charlie22a	673	10	0.659316	0.132256	0.0597642	0.967741	-0.527993
X1_LINE	64	0	0.525711	0.266948	0.157864	1	-0.53208
LTR108d_Mam	63	0	0.523366	0.266836	0.156718	1	-0.53595
LTR40a	1580	34	0.739338	0.0538765	0.0284611	0.980685	-0.552721
BTLTR1C1	36	0	0.51191	0.261417	0.156894	1	-0.562878
Tigger9b	665	12	0.669766	0.104023	0.0538599	0.969745	-0.568365
Eulor9C	93	0	0.483077	0.273484	0.131889	1	-0.591038
ERV1-1C-LTR_BT	2945	80	0.780193	0.0207886	0.0101054	0.992474	-0.602383
MER67A	351	5	0.60826	0.142461	0.076382	0.966349	-0.607003
MLT-int	197	2	0.561228	0.184781	0.103417	0.968212	-0.611126
LTR105_Mam	416	6	0.615809	0.129086	0.0682958	0.968308	-0.621891
UCON86	91	0	0.455082	0.280407	0.116723	1	-0.627201
Tigger17b	68	0	0.439186	0.282509	0.109954	1	-0.651679
LTR109B	192	2	0.536684	0.186942	0.0877952	0.973969	-0.653901
MER3	8459	162	0.812554	0.00639412	0.00311632	0.997538	-0.65709
X7B_LINE	568	7	0.609328	0.119244	0.0530427	0.974816	-0.660078
LTR13_BT	924	16	0.67394	0.0677414	0.0366668	0.978531	-0.665605
LTR39C_BT	2817	56	0.749266	0.0226069	0.0107518	0.992396	-0.685376
X8_LINE	169	1	0.508845	0.193658	0.101268	0.979461	-0.694928
LTR81B	657	10	0.631094	0.0858905	0.0425387	0.977872	-0.707939
ALTR2C_BT	3588	87	0.771887	0.0112224	0.00569821	0.995784	-0.728368
MIR	133102	2936	0.914838	1.8137e-06	9.0914e-07	0.999999	-0.737273
MER58C	1818	29	0.700601	0.0356162	0.0177186	0.988658	-0.743489
LTR40b	1012	18	0.663075	0.0555245	0.0247293	0.985539	-0.744214
MER88	144	1	0.474632	0.19959	0.0819242	0.984287	-0.752435
L4_C_Mam	3249	63	0.750022	0.0152607	0.0076823	0.994532	-0.753807
MLT2C1	1924	36	0.711413	0.0281888	0.0133321	0.991219	-0.761386
MamGypLTR1c	559	8	0.61161	0.0838753	0.0459743	0.977556	-0.763484
LTR81C	395	5	0.573018	0.11178	0.0542488	0.977253	-0.764497
Arthur1B	1859	35	0.710408	0.0264625	0.0140202	0.990794	-0.778084
MLT1J-int	1233	23	0.680404	0.038985	0.0202401	0.987609	-0.782807
Kanga1c	651	9	0.602317	0.0776529	0.0340822	0.983244	-0.811744
Tigger11a	275	3	0.524655	0.13262	0.057875	0.98046	-0.816464
LTR91A	1389	23	0.669915	0.0329478	0.0162506	0.990186	-0.856622
Charlie15a	1597	24	0.674482	0.0298751	0.0160043	0.99024	-0.866251
MER74C	208	2	0.497382	0.138043	0.0644612	0.982038	-0.866498
L2d	16765	335	0.829884	0.000486043	0.000235067	0.999808	-0.891343
Kanga1	675	10	0.600526	0.0553538	0.0278127	0.986135	-0.924669
LTR82A	928	16	0.635674	0.0376808	0.0194688	0.989164	-0.930708
HERVL74-int	278	4	0.538012	0.0910249	0.0494124	0.98144	-0.930812
MER46C	2202	39	0.697706	0.0152705	0.00736071	0.995211	-0.943141
MLT1E1A-int	72	0	0.406707	0.177967	0.092078	1	-0.973015
MER31B	1176	21	0.647083	0.0279679	0.0127248	0.992607	-0.975464
MLT1E	799	13	0.612866	0.0414415	0.0203374	0.989301	-0.976585
ERV2-2-I_BT	153	4	0.521247	0.0868847	0.0439982	0.983921	-0.997352
MamGypLTR2b	512	6	0.552667	0.0618788	0.0334212	0.985839	-1.03386
MER110	530	7	0.552827	0.057949	0.0261543	0.988571	-1.05772
MLT1E3	1641	31	0.667916	0.0146534	0.0068227	0.995795	-1.0679
MamTip1b	264	2	0.465988	0.102133	0.0476977	0.987407	-1.09154
MER5C	1021	15	0.612769	0.0278644	0.0145506	0.992214	-1.0987
MER97a	197	2	0.462826	0.100715	0.0471209	0.987631	-1.10802
L4_B_Mam	2122	37	0.676964	0.00963296	0.00481864	0.996959	-1.13484
Tigger13a	2208	42	0.68105	0.00690832	0.00346532	0.997785	-1.19735
MER63C	722	13	0.588277	0.0266596	0.0131281	0.993338	-1.2049
Arthur1C	557	6	0.520404	0.0493082	0.0212163	0.991464	-1.23166
L4_A_Mam	4208	83	0.725692	0.00205151	0.000980956	0.999315	-1.24336
LTR86B2	174	1	0.4222	0.0969321	0.0535714	0.990662	-1.26084
L2d2	31234	617	0.839374	9.47233e-06	4.69147e-06	0.999996	-1.26902
MER92D	182	1	0.409884	0.0983681	0.0476611	0.991894	-1.29591
MER5C1	416	4	0.491855	0.0533474	0.0280217	0.990243	-1.30305
MLT1-int	224	2	0.451396	0.0726807	0.0415156	0.989328	-1.30656
Tigger2	908	12	0.571227	0.0240137	0.0112028	0.994516	-1.30837
L1MB5	7339	183	0.772659	0.000303462	0.000148394	0.999888	-1.30899
X9b_DNA	403	4	0.486532	0.0536001	0.0261634	0.990975	-1.3209
MER31A	567	8	0.537349	0.0323901	0.0158674	0.993071	-1.33477
Kanga11a	634	8	0.534818	0.0329426	0.0150523	0.993454	-1.33829
L1P5	129	0	0.360371	0.120033	0.065575	1	-1.35568
L1MB2	6384	153	0.758646	0.000380953	0.000185034	0.999863	-1.36252
X7A_LINE	599	6	0.504252	0.0382223	0.0163873	0.993585	-1.40037
MER58B	6091	115	0.736371	0.000558745	0.000273119	0.999805	-1.43609
MER87_BT	1874	35	0.645274	0.00491101	0.00221632	0.998666	-1.45922
HERV16-int	1381	26	0.616767	0.00657579	0.00300007	0.998301	-1.52133
Mam_R4	410	4	0.46338	0.0406997	0.0187762	0.99379	-1.54298
ERV3-16A3_I-int	4261	104	0.721519	0.000493717	0.000226029	0.999842	-1.55701
EuthAT-2	949	15	0.569669	0.0117355	0.00580781	0.997088	-1.56719
Tigger1a_Art	5245	103	0.72072	0.000424807	0.000219842	0.999846	-1.59314
Charlie4z	3595	54	0.671867	0.00161974	0.000774053	0.999505	-1.60109
X6b_DNA	527	5	0.481174	0.0296678	0.0162284	0.994138	-1.6123
Kanga1d	494	5	0.480446	0.0295418	0.0161143	0.994188	-1.61759
LTR84a	470	5	0.480534	0.0294325	0.0161989	0.994156	-1.61889
MamGyp-int	436	5	0.467883	0.0299645	0.0132044	0.995347	-1.6693
MLT1G1-int	273	3	0.434074	0.0397942	0.0200862	0.994225	-1.6858
MamRep434	1261	17	0.568304	0.00826781	0.00361022	0.99817	-1.69788
Kanga1a	586	7	0.494688	0.0210076	0.0098914	0.996077	-1.70347
L3	33484	707	0.829655	4.09494e-07	2.11149e-07	1	-1.72097
MER110-int	346	4	0.448956	0.0297182	0.0151936	0.995111	-1.7642
Charlie7a	810	9	0.507345	0.0150168	0.00645756	0.997268	-1.78506
LTR91	949	12	0.531883	0.00949411	0.00471311	0.997835	-1.84217
EutTc1-N2	123	0	0.307227	0.0805778	0.0412964	1	-1.8623
LTR52	809	11	0.524131	0.0100076	0.0052267	0.997657	-1.86369
LTR45B_BT	104	0	0.304882	0.0799289	0.0408045	1	-1.88041
DNA1_Mam	135	0	0.28858	0.0858197	0.0334865	1	-1.91203
Charlie11	106	0	0.291076	0.0830752	0.0350889	1	-1.92392
Charlie24	982	13	0.534181	0.00695332	0.00382586	0.998218	-1.95195
MER97b	196	1	0.340583	0.0504813	0.0211011	0.99693	-2.01523
LTR78B	1875	28	0.592471	0.00211561	0.00094565	0.999481	-2.01979
MLT2D	3287	58	0.653677	0.000470264	0.000225363	0.999859	-2.04102
MER96B	1630	22	0.572604	0.00284367	0.00145551	0.99924	-2.04807
MLT1C	5702	113	0.703508	7.15504e-05	3.71536e-05	0.999975	-2.10321
LTR68	287	2	0.376423	0.0279757	0.0153334	0.996624	-2.18938
HAL1M8	1729	32	0.594382	0.00118416	0.000527083	0.999707	-2.19651
Tigger18a	979	14	0.523263	0.00402797	0.00218131	0.998995	-2.23779
MLT1E1A	2783	50	0.632327	0.000409266	0.000201438	0.999879	-2.24034
Charlie17	432	4	0.40939	0.0173917	0.00723688	0.997853	-2.26724
LTR10A_BT	1629	30	0.585115	0.00115043	0.000516885	0.999718	-2.27257
hAT-5_Mam	665	7	0.455921	0.00967195	0.0042808	0.998421	-2.2827
MLT1E2-int	106	0	0.281551	0.0526299	0.0313868	1	-2.33827
L1M	706	6	0.444042	0.00976028	0.0050864	0.99822	-2.35481
MLT1F2-int	181	1	0.319892	0.0346826	0.0155277	0.997859	-2.40056
MLT2B3	127	0	0.257276	0.057323	0.0223922	1	-2.43195
L1MEb	1111	18	0.532506	0.00192221	0.000993793	0.999523	-2.46938
MER106A	489	4	0.399771	0.0128211	0.00584547	0.998302	-2.50275
Charlie21a	477	5	0.422208	0.00943867	0.00536591	0.998273	-2.51916
Tigger1	5335	141	0.702285	1.02864e-05	4.97196e-06	0.999997	-2.5431
Zaphod3	1074	13	0.497168	0.0026968	0.00133485	0.999418	-2.5902
SINE2-1_BT	34074	609	0.796535	8.3187e-09	3.93441e-09	1	-2.65176
L1MB3	13491	320	0.756601	2.36695e-07	1.16017e-07	1	-2.6662
L1MEg1	665	8	0.440436	0.00417781	0.00182499	0.999333	-2.81441
LTR4_BT	559	6	0.420337	0.00540949	0.00294677	0.999019	-2.83442
MER106B	679	6	0.414152	0.00570528	0.002452	0.999194	-2.85349
L2a	117287	2796	0.864688	1.81927e-14	8.74473e-15	1	-2.88197
Tigger1a_Mars	140	0	0.248559	0.0360709	0.0194745	1	-2.89772
LTR2_BT	331	5	0.394598	0.0068974	0.00293263	0.999112	-2.8995
L1MEj	1505	24	0.539667	0.000519252	0.000281478	0.99986	-2.92285
LTR8_BT	373	3	0.356743	0.00853409	0.0046956	0.998863	-3.07646
Charlie15b	1327	16	0.496363	0.000877941	0.000477162	0.999788	-3.08873
Tigger22N1	747	7	0.423033	0.00317729	0.00179938	0.99938	-3.10034
L1M3c	1913	39	0.575176	0.000126527	6.2415e-05	0.999966	-3.11016
Charlie23a	855	8	0.426306	0.00246819	0.00116029	0.999588	-3.20747
LTR75_BT	706	8	0.422195	0.0024478	0.00104567	0.999632	-3.24841
LTR102_Mam	393	3	0.341406	0.00626861	0.00321778	0.999251	-3.41535
LTR37B	1492	19	0.497333	0.000367431	0.000186187	0.999916	-3.46133
MER34A1	3423	49	0.581059	2.78483e-05	1.24975e-05	0.999993	-3.56783
LTR80B	342	2	0.307898	0.00756913	0.00381883	0.999295	-3.60451
L1PB4	500	5	0.372045	0.0029191	0.00146742	0.999579	-3.6157
L1M8	1100	16	0.47092	0.000417256	0.000178527	0.999924	-3.67175
Charlie5	2341	33	0.540265	6.18822e-05	3.12194e-05	0.999984	-3.73819
LTR53-int	319	3	0.328171	0.00438768	0.00233033	0.999477	-3.79007
Charlie29b	1012	10	0.425281	0.000829736	0.000393434	0.999856	-3.80053
Cheshire	1027	13	0.449047	0.000452049	0.000242845	0.999904	-3.86347
L1MEg2	558	5	0.361955	0.00220818	0.00105769	0.999704	-3.89395
L1MD3	4727	85	0.618629	1.43359e-06	7.6441e-07	1	-4.04874
MER53	4934	67	0.597063	3.52108e-06	1.74455e-06	0.999999	-4.05752
MLT2B2	962	11	0.427297	0.000466939	0.000258848	0.999904	-4.08579
Charlie6	215	1	0.250034	0.00855136	0.00349517	0.999612	-4.13552
L1MCc	2220	37	0.535491	1.89516e-05	9.16922e-06	0.999995	-4.25516
ERV1-1-LTR_BT	2348	40	0.541935	1.22524e-05	6.74432e-06	0.999997	-4.34106
MER87B_BT	3244	54	0.569706	4.35758e-06	2.29629e-06	0.999999	-4.35138
MER58A	10045	168	0.668887	2.78639e-08	1.36857e-08	1	-4.38313
MLT1C2-int	324	2	0.281917	0.00382451	0.00188174	0.999679	-4.4158
LTR109A1	169	0	0.195871	0.0109632	0.00673431	1	-4.61012
ERV2-1C-LTR_BT	221	3	0.294931	0.00215674	0.000905529	0.999815	-4.69664
L1ME5	1906	27	0.49403	2.27503e-05	1.17623e-05	0.999995	-4.72347
L1M7	1831	27	0.494454	2.24511e-05	1.21872e-05	0.999994	-4.72357
MER33	7547	123	0.634763	5.1865e-08	2.73034e-08	1	-4.77693
MER89-int	405	3	0.295727	0.00173343	0.000815836	0.999833	-4.85307
LTR37-int	944	11	0.39774	0.000159114	7.11842e-05	0.999975	-5.05211
MER104	1415	13	0.415278	9.85503e-05	5.01572e-05	0.999981	-5.07944
L1M3d	709	8	0.364514	0.000244869	0.000116989	0.999964	-5.25755
MER52-int	323	2	0.258318	0.00196398	0.000860217	0.999864	-5.2859
MADE2	1614	13	0.40959	7.78621e-05	3.67621e-05	0.999987	-5.29094
Charlie16a	749	5	0.323538	0.000494927	0.000249205	0.999937	-5.38126
MLT1J2-int	367	2	0.255364	0.00136807	0.000755554	0.999882	-5.64007
MER113A	1181	10	0.379023	9.1317e-05	5.1492e-05	0.999983	-5.65379
Charlie4a	2176	29	0.478383	4.02177e-06	2.11313e-06	0.999999	-5.73962
Tigger2f	1514	21	0.444815	1.05249e-05	5.60274e-06	0.999998	-5.81764
LTR80A	320	1	0.210323	0.00207978	0.000895563	0.999915	-6.03265
CHR-2	14174	281	0.679765	8.01299e-12	3.88196e-12	1	-6.17938
MER58D	935	6	0.320638	0.000168194	7.81987e-05	0.99998	-6.19338
MLT1C2	13169	252	0.662341	3.8063e-12	1.79087e-12	1	-6.78722
L1M3b	422	3	0.254309	0.000333009	0.00014533	0.999974	-6.86935
MER103C	5840	77	0.551534	6.44008e-09	3.24993e-09	1	-7.03189
L2c	78346	1986	0.998299	0.936056	0.467854	0.541257	-7.05006e-05
L1M4a1	2024	33	0.465122	3.66175e-07	1.82754e-07	1	-7.10775
Charlie2a	1639	19	0.402316	1.85441e-06	7.85208e-07	1	-7.52929
Zaphod	1823	21	0.406696	6.35311e-07	3.48391e-07	1	-8.04358
SINE2-2_BT	46989	784	0.735014	3.20797e-19	1.51461e-19	1	-8.21413
L1MB8	12388	260	0.646485	6.84776e-14	3.29169e-14	1	-8.28454
ERV1-2-LTR_BT	866	7	0.300323	1.52786e-05	8.71356e-06	0.999998	-8.3576
X24_DNA	331	0	0.134468	0.00110974	0.000654092	1	-8.55311
LTR90B	316	0	0.129229	0.00118474	0.000490111	1	-8.63866
BtERVF1_I-int	268	2	0.205444	0.000149662	7.78895e-05	0.99999	-8.73292
L1MD1	4565	88	0.537344	1.05508e-10	5.17366e-11	1	-8.93997
LTR104_Mam	1045	25	0.998266	0.921013	0.473391	0.605536	-8.94721e-05
BLACKJACK	1711	20	0.38411	2.14202e-07	9.56537e-08	1	-9.20619
L1MB7	16287	359	0.66336	1.85505e-16	9.16324e-17	1	-9.31528
LTR37A	1541	13	0.33675	6.50932e-07	2.99681e-07	1	-9.71429
L1M4a2	2129	33	0.426179	8.73248e-09	4.3539e-09	1	-9.91617
Charlie14a	320	0	0.119989	0.000510017	0.000274164	1	-10.0716
MLT1B	14952	261	0.62864	7.98013e-16	4.18389e-16	1	-10.111
L1MEh	1756	19	0.36946	9.03601e-08	4.85916e-08	1	-10.1188
Arthur1	1967	22	0.379958	3.3849e-08	1.69681e-08	1	-10.4294
Eutr11	440	1	0.160161	0.000111287	6.06018e-05	0.999996	-10.4469
MER67D	940	6	0.260002	3.84681e-06	1.76395e-06	1	-10.5233
MLT1A	7995	120	0.545468	2.17018e-13	1.00004e-13	1	-11.0734
BTLTR1B1	852	18	0.339949	1.66221e-08	8.27363e-09	1	-12.1094
L1ME3D	2424	29	0.388896	9.08823e-10	5.04586e-10	1	-12.3195
L2	44415	896	0.712204	3.53171e-26	1.66937e-26	1	-12.4623
Charlie2b	2619	28	0.382537	9.7045e-10	4.18392e-10	1	-12.495
L1ME3F	2716	34	0.400937	2.67046e-10	1.15315e-10	1	-12.6231
Tigger2a_Art	6323	73	0.477334	5.67974e-13	2.78321e-13	1	-13.0652
MER67C	1260	9	0.269161	1.16852e-07	4.99069e-08	1	-13.1261
MLT1E2	3319	41	0.411592	2.07202e-11	9.91832e-12	1	-13.6826
Kanga2_a	1176	7	0.238106	7.31641e-08	4.25284e-08	1	-14.7732
MLT1A0	11455	176	0.552806	4.64656e-18	2.41925e-18	1	-14.8223
MER92-int	1033	7	0.235966	6.99183e-08	3.51022e-08	1	-14.9072
BtERV3B_LTR	1242	8	0.24668	3.52904e-08	2.00618e-08	1	-15.0484
MLT1D	15092	259	0.581017	2.14369e-21	1.0031e-21	1	-16.1909
L1MDb	948	6	0.213884	3.70234e-08	1.8989e-08	1	-16.5359
L1MB4	6725	102	0.481547	6.4103e-17	3.29272e-17	1	-17.0716
HAL1b	2713	26	0.339807	1.05936e-11	5.01726e-12	1	-17.0903
L1MD2	8184	141	0.512505	9.70724e-19	4.32377e-19	1	-17.371
ERV2-1B-LTR_BT	524	6	0.204491	1.71572e-08	8.09948e-09	1	-17.7823
MLT2B1	2876	29	0.346022	2.35607e-12	1.1002e-12	1	-17.8029
ERV2-2B_BT-I	290	2	0.139091	3.74185e-07	2.20678e-07	1	-18.2903
Charlie1a	4591	65	0.425717	1.05682e-15	5.88885e-16	1	-18.4509
Bov-tA1	216595	4389	0.787656	8.21468e-57	4.30173e-57	1	-19.3137
BtERVF2_I-int	424	2	0.134677	1.62162e-07	9.66266e-08	1	-19.6397
Charlie1b	2525	19	0.292433	5.47624e-12	2.74092e-12	1	-19.9759
Charlie7	2828	25	0.315461	4.14951e-13	2.17082e-13	1	-20.6094
L1ME3	6560	89	0.444244	1.23074e-18	6.22123e-19	1	-20.9648
MER31-int	2054	16	0.268597	4.20808e-12	2.43248e-12	1	-21.5743
L1ME3E	2474	22	0.293074	2.08424e-13	9.65507e-14	1	-22.4539
L1MCb	1695	14	0.248833	3.64094e-12	1.59033e-12	1	-22.9548
MER34B-int	1326	6	0.177616	1.34461e-10	7.30489e-11	1	-24.6111
ERV1-2C-LTR_BT	2667	23	0.285936	1.18606e-14	6.90136e-15	1	-25.1535
Charlie18a	1607	6	0.172961	5.36205e-11	2.80038e-11	1	-26
L1ME4c	6269	65	0.385385	6.02484e-20	3.29863e-20	1	-26.4397
HAL1ME	4723	43	0.338665	3.09905e-18	1.67151e-18	1	-27.3499
L1M6	3063	24	0.279622	1.02042e-15	4.60388e-16	1	-27.5607
L1M4b	3445	40	0.325215	2.44901e-18	1.02735e-18	1	-28.5393
HAL1	14502	235	0.511436	2.82549e-30	1.31094e-30	1	-28.5849
MER34A	5230	45	0.337005	4.14423e-19	1.8368e-19	1	-28.8452
ERV2-1-I_BT	1712	16	0.228779	1.64496e-15	7.80908e-16	1	-31.4596
L1MA10	3802	29	0.28395	4.07102e-18	2.24963e-18	1	-31.5858
CHRL1_BT	18852	217	0.492585	8.86529e-32	4.15231e-32	1	-31.7217
L1ME3A	11053	156	0.455023	3.74753e-29	1.66256e-29	1	-32.2919
CHR-2_BT	23727	319	0.527028	7.95897e-37	4.10359e-37	1	-33.3573
L1MC2	4818	53	0.335613	2.71476e-22	1.45322e-22	1	-33.9696
L1MCa	6970	103	0.403585	5.8375e-27	2.80648e-27	1	-34.3415
L1ME3C	1942	10	0.182764	4.98317e-15	2.93471e-15	1	-35.069
L1ME4b	15805	211	0.474753	1.89835e-34	9.78656e-35	1	-36.2424
L1ME3B	5002	49	0.317042	3.04096e-23	1.31671e-23	1	-37.3163
L1ME2z	5477	52	0.316582	9.82482e-25	5.52013e-25	1	-39.8371
ERV1-2-I_BT	3170	44	0.29775	1.07415e-23	6.12695e-24	1	-40.1457
ERV1-1-I_BT	2389	30	0.259174	1.35401e-21	6.81107e-22	1	-40.6517
L1MC4a	7814	87	0.360797	4.84197e-30	2.30631e-30	1	-43.1148
L1M3de	3240	32	0.259736	5.64055e-23	3.02018e-23	1	-43.271
L1MDa	5337	66	0.329702	4.25262e-28	2.02912e-28	1	-43.8151
ERV1-3-I_BT	3480	24	0.232441	1.19248e-21	6.58799e-22	1	-44.0453
CHRL	28742	353	0.503021	3.87431e-47	1.77601e-47	1	-46.0084
L1ME2	9120	115	0.382356	3.80752e-34	2.12001e-34	1	-46.3531
L1MB1	5913	58	0.305729	3.88187e-29	1.73355e-29	1	-48.5735
CHR-2B	34444	513	0.532432	8.35601e-56	4.58955e-56	1	-50.0842
L1MC5a	13194	157	0.40377	4.07479e-40	1.76195e-40	1	-51.5375
Mariner1_BT	8287	56	0.296141	2.9449e-30	1.44083e-30	1	-51.8458
L1MEi	3195	18	0.192672	1.12269e-22	6.35254e-23	1	-52.1477
L1ME3Cz	9262	92	0.33694	8.3951e-37	4.32481e-37	1	-56.619
L1MEf	7902	97	0.336801	1.82514e-38	8.35941e-39	1	-59.251
L1MC4	17797	228	0.413498	6.73078e-54	3.39567e-54	1	-67.7436
L1MC5	11002	108	0.327952	2.62855e-45	1.34411e-45	1	-71.7049
SINE2-3_BT	21456	203	0.388382	1.05646e-56	5.94489e-57	1	-76.3767
L1MC3	10455	117	0.324823	9.85087e-50	5.25947e-50	1	-79.502
L1ME3G	11085	94	0.302071	4.96921e-47	2.27004e-47	1	-79.9683
L1MEc	13196	166	0.35515	4.85299e-57	2.06884e-57	1	-84.105
L1MC	8201	63	0.252114	2.14913e-45	1.26193e-45	1	-88.7928
L1ME1	20665	289	0.403587	7.86184e-72	4.41592e-72	1	-93.0792
L1MC1	14321	169	0.341383	1.64526e-63	8.94755e-64	1	-97.3485
L1M4c	4692	37	0.187207	6.3896e-45	3.06009e-45	1	-106.831
L1MEd	10517	88	0.262004	6.73079e-58	3.1325e-58	1	-110.476
L1M2	9462	81	0.250393	4.72507e-58	2.33676e-58	1	-114.521
L1MEg	8935	65	0.2208	9.82021e-59	5.14607e-59	1	-126.41
L1M4	19274	215	0.325875	1.6009e-88	7.47855e-89	1	-142.019
L1ME4a	15591	109	0.257743	1.55317e-73	8.12555e-74	1	-142.414
L1_Art	61925	659	0.427113	9.80319e-139	5.45995e-139	1	-169.379
L1MD	8674	41	0.152326	4.57652e-68	2.16445e-68	1	-182.811
ERV2-1-LTR_BT	8097	33	0.128903	1.84419e-70	9.71213e-71	1	-206.11
L1M3	16123	122	0.214696	1.42869e-112	7.72949e-113	1	-248.255
L1-3_BT	58431	905	0.343983	3.20667e-200	1.33439e-200	1	-307.139
L1M5	35493	277	0.265079	4.10089e-172	1.93618e-172	1	-328.293
L1-2_BT	111037	1023	0.29694	3.76025e-200	1.95959e-200	1	-349.344
L1MA9	46448	416	0.276211	2.896e-200	8.35356e-201	1	-370.375
BovB	562047	7572	0.26904	9.23831e-200	4.42338e-200	1	-376.992
BTLTR1J	22110	30	0.0667385	2.24604e-152	1.26222e-152	1	-592.239
L1_BT	88749	526	0.107955	4.27659e-200	1.38861e-200	1	-640.272
BTLTR1	82729	168	0.0911639	2.23691e-200	9.1753e-201	1	-689.87

## Sheet: IFNG-inducible H3K27ac
TE family	TE family size	Number of overlaps	Odds ratio	Fisher's two tail	Fisher's left tail	Fisher's right tail	Combo score
Bov-A2	362131	3210	3.68718	2.31508e-200	1	9.45207e-201	375.818
Bov-tA2	537541	3384	2.06862	1.65866e-109	1	9.02852e-110	114.075
MER41_BT	5491	92	3.40174	5.47045e-22	1	5.47045e-22	37.5544
MIR3	62466	516	1.78195	3.54553e-30	1	2.49551e-30	24.5455
MIR	133102	948	1.55384	1.6319e-30	1	9.48165e-31	18.9399
MIRc	76415	570	1.59621	1.26714e-22	1	7.88872e-23	14.7729
SINE2-2_BT	46989	374	1.68814	3.06552e-19	1	1.96071e-19	13.9858
MIRb	166108	1107	1.45879	8.85489e-26	1	4.88884e-26	13.6482
MER95	19	2	32.8897	0.0041085	0.999883	0.0041085	12.026
Eutr2	25	2	24.8049	0.00698997	0.999733	0.00698997	9.98558
MIR1_Amn	9606	95	2.07894	3.81729e-10	1	3.2117e-10	9.94423
BTLTR1E2	66	3	11.685	0.0053741	0.999556	0.0053741	8.04966
L2b	65106	466	1.48295	2.99797e-14	1	1.87463e-14	7.68749
HERVL40-int	827	14	3.48059	0.000174388	0.999951	0.000174388	6.76276
DNA1_Mam	135	4	7.53555	0.00493487	0.999366	0.00493487	6.72113
L3b	6997	68	2.01518	3.46283e-07	1	2.94639e-07	6.53106
LTR72_BT	1151	17	3.07818	0.000138987	0.999956	0.000138987	6.2564
AmnHarb1	97	3	8.30513	0.0133224	0.998454	0.0133224	5.72753
SINE2-1_BT	34074	250	1.53689	7.69803e-10	1	4.97238e-10	5.65054
Chap1_Mam	231	5	5.22672	0.00665245	0.998772	0.00665245	5.19416
MER5B	19003	149	1.63391	5.75566e-08	1	4.1974e-08	5.12825
Charlie15b	1327	17	2.72198	0.000547712	0.999804	0.000547712	4.71168
MARE6	113	3	6.97392	0.0209458	0.997115	0.0209458	4.70423
Charlie23a	855	12	3.08191	0.00148278	0.999534	0.00148278	4.59368
MER31A	567	9	3.438	0.00322621	0.999094	0.00322621	4.43843
MER99	182	4	5.38036	0.0152626	0.997276	0.0152626	4.40961
Charlie19a	1086	14	2.79397	0.00141109	0.999511	0.00141109	4.22526
MLT1A0-int	325	6	4.09171	0.00845204	0.998014	0.00845204	4.21388
LTR45C	70	2	8.6901	0.0479203	0.99473	0.0479203	4.11595
ERV54-EC_LTR	1816	21	2.39043	0.000704093	0.99975	0.000614115	3.96339
CHRL1_BT	18852	143	1.5703	9.374e-07	1	6.37395e-07	3.92454
ALTR2B_BT	2948	31	2.11756	0.000270747	0.999889	0.000240492	3.86142
MamTip3B	540	8	3.37226	0.00636694	0.998185	0.00636694	3.85128
MER91B	1047	13	2.76083	0.00235923	0.999174	0.00235923	3.84916
LTR47_BT	356	6	3.8576	0.0110117	0.997262	0.0110117	3.81389
MLT1N2-int	24	1	16.4063	0.114516	0.993452	0.114516	3.79859
MLT1O	2812	29	2.15345	0.00038176	0.999866	0.000295374	3.78277
L2c	78346	513	1.34562	1.56497e-09	1	8.6841e-10	3.77117
Charlie4z	3595	35	2.05722	0.000266767	0.999924	0.000160811	3.7193
hAT-N1_Mam	142	3	5.67496	0.0351652	0.994082	0.0351652	3.64142
Eulor9B	27	1	15.1022	0.123777	0.992288	0.123777	3.55384
UCON78	153	3	5.30281	0.0415326	0.992537	0.0415326	3.3252
Charlie16	971	12	2.64885	0.00488262	0.998227	0.00488262	3.24829
MER5A	27050	191	1.46395	1.44478e-06	0.999999	9.34021e-07	3.21131
hAT-4b_Ther	155	3	5.1419	0.0447701	0.991715	0.0447701	3.18677
L1ME4b	15805	123	1.54812	1.07724e-05	0.999996	6.8441e-06	3.13223
L1MB3	13491	109	1.56358	2.50946e-05	0.999991	1.4913e-05	2.9666
ORSL	937	11	2.59433	0.00828989	0.996937	0.00828989	2.86275
MER31_BT	321	5	3.59021	0.0282444	0.992522	0.0282444	2.85659
MamRTE2	38	1	10.5619	0.172153	0.984642	0.172153	2.5985
LTR45_BT	174	3	4.43223	0.0637909	0.986396	0.0637909	2.56742
LTR1_BT	3520	33	1.83815	0.00220836	0.999176	0.00156115	2.33258
MER102c	1830	18	2.09543	0.0069811	0.99729	0.00590625	2.30107
MER77	1065	12	2.35353	0.0153869	0.995286	0.0116073	2.23855
UCON59	45	1	9.01946	0.198477	0.979294	0.198477	2.22839
MER20	13677	101	1.5085	0.000180814	0.99993	0.000107171	2.21988
Tigger15a	2999	27	1.87155	0.00413417	0.998275	0.00334122	2.15535
MER5A1	12394	91	1.52133	0.000280032	0.999887	0.000175445	2.15061
EUTREP7	202	3	3.91828	0.0847078	0.979697	0.0847078	2.11223
L1MEa	282	4	3.37284	0.0640238	0.982158	0.0640238	2.09364
L2d2	31234	208	1.37206	2.73827e-05	0.999988	1.64166e-05	2.08207
UCON58	123	2	4.92409	0.125331	0.976106	0.125331	2.07434
MER5C	1021	11	2.35408	0.0217082	0.993572	0.0158778	2.05454
EuthAT-N1	48	1	8.29434	0.213822	0.97579	0.213822	2.04477
CHR-2A	30203	207	1.36855	3.22079e-05	0.999986	1.98024e-05	2.0333
MER112	2787	25	1.88689	0.00624287	0.997798	0.00430565	2.01945
LTR86B1	214	3	3.72022	0.0951709	0.976048	0.0951709	1.93613
Tigger6a	475	6	2.65986	0.0520022	0.981639	0.0520022	1.81214
Tigger21a	133	2	4.42821	0.148357	0.968733	0.148357	1.77897
MamGypLTR1d	424	5	2.8225	0.0652876	0.978333	0.0652876	1.77417
Kanga1c	651	7	2.4609	0.0483278	0.981545	0.0483278	1.70947
MER21C	7201	58	1.5678	0.00234325	0.99917	0.00133592	1.7063
X12_DNA	856	9	2.36583	0.0434437	0.988256	0.0293586	1.69217
MARE10	58	1	6.90491	0.250975	0.966027	0.250975	1.6736
MER81	2544	22	1.86531	0.0140008	0.995681	0.00838803	1.66738
MER113	2460	22	1.85483	0.0142408	0.995389	0.0089076	1.64574
LTR37-int	944	10	2.21934	0.0375112	0.986889	0.0307683	1.6399
L1MC5a	13194	97	1.44487	0.00093707	0.999611	0.000573538	1.60781
Eutr11	440	5	2.67459	0.0778751	0.97284	0.0778751	1.57346
MER63D	1914	17	1.90051	0.0216803	0.991135	0.0176696	1.54145
LTR106_Mam	447	5	2.63282	0.0819224	0.971011	0.0819224	1.51755
LTR65	341	4	2.86369	0.100787	0.967297	0.100787	1.51271
Chap1a_Mam	903	9	2.24071	0.0502107	0.98356	0.0390832	1.51221
ALTR2C_BT	3588	31	1.69608	0.0104255	0.996237	0.00661975	1.51062
Charlie32a	156	2	3.90524	0.180096	0.957287	0.180096	1.46324
LTR7_BT	141	2	3.89389	0.180914	0.957011	0.180914	1.45626
LTR75B	150	2	3.79749	0.187884	0.954287	0.187884	1.39779
X7A_LINE	599	6	2.38518	0.0781059	0.969502	0.0781059	1.38868
MamRep137	1439	13	1.9441	0.0390581	0.983838	0.0332268	1.35069
MLT1H2-int	247	3	3.05695	0.145363	0.956112	0.145363	1.3502
MamRep488	268	3	3.03745	0.147278	0.955256	0.147278	1.33336
Charlie1	1469	14	1.94286	0.0434367	0.986769	0.0271084	1.30518
Tigger16a	1175	11	2.05755	0.0559144	0.983211	0.0366031	1.30374
LTR86C	264	3	2.99232	0.151922	0.953213	0.151922	1.29407
CHRL	28742	185	1.31562	0.000549424	0.999752	0.000331888	1.29015
Tigger17b	68	1	5.51355	0.303609	0.949057	0.303609	1.27505
Charlie7	2828	24	1.72123	0.0239125	0.992041	0.0143065	1.27025
LTR78	2866	24	1.71043	0.0243553	0.991448	0.0152832	1.24935
L2a	117287	699	1.199	1.79768e-05	0.999992	1.02694e-05	1.24245
LTR109A2	74	1	5.28545	0.314428	0.945049	0.314428	1.20697
Tigger11a	275	3	2.85713	0.166971	0.946363	0.166971	1.17736
LTR109A1	169	2	3.42478	0.218929	0.941389	0.218929	1.17163
CR1_Mam	1062	10	2.05845	0.0760289	0.978688	0.046668	1.16553
MER74B	700	7	2.218	0.100944	0.968706	0.0745027	1.14457
Tigger12c	518	5	2.33068	0.119609	0.952701	0.119609	1.12582
LTR39C_BT	2817	23	1.68223	0.0320441	0.988254	0.0207021	1.12125
MER70-int	79	1	4.98029	0.330107	0.938971	0.330107	1.11491
MLT1G1-int	273	3	2.74674	0.180721	0.939843	0.180721	1.08307
UCON29	183	2	3.27566	0.233475	0.934877	0.233475	1.08144
Charlie20a	592	6	2.33671	0.1331	0.966532	0.0841285	1.07242
LTR40A1	404	4	2.44044	0.152361	0.942807	0.152361	1.05176
MER102b	1949	16	1.74429	0.0529887	0.977735	0.0411192	1.02402
Tigger6b	186	2	3.1738	0.244235	0.929891	0.244235	1.02004
ALTR2B1_BT	4908	38	1.52733	0.0216387	0.991851	0.0129316	1.01719
MER21B	1128	10	1.90778	0.0899894	0.966014	0.0694594	0.974582
Tigger14a	788	7	2.06102	0.119511	0.955384	0.0993914	0.962594
MER57LA	1149	10	1.89786	0.0913234	0.964945	0.071307	0.960812
MER97c	185	2	3.07412	0.255476	0.924524	0.255476	0.960194
Charlie15a	1597	13	1.78596	0.0720567	0.970025	0.0570485	0.955787
Tigger10	1003	9	1.97903	0.10996	0.965939	0.0722988	0.944181
MER94	3024	23	1.62971	0.0480659	0.983577	0.0281166	0.928793
UCON55	203	2	3.01755	0.262188	0.921192	0.262188	0.926368
MamSINE1	3612	27	1.58158	0.0412299	0.985341	0.0242826	0.915846
Eulor9A	93	1	4.32133	0.369821	0.921903	0.369821	0.912174
L2d	16765	109	1.32969	0.00649243	0.997329	0.00363495	0.899304
MER102a	2152	17	1.67933	0.0644098	0.97362	0.0469576	0.890763
hAT-N1a_Mam	322	3	2.48542	0.219434	0.920066	0.219434	0.865189
Kanga2_a	1176	10	1.82767	0.102519	0.956282	0.0859749	0.860608
MamRep4096	814	7	1.971	0.13446	0.945057	0.117607	0.853048
MER135	539	5	2.2868	0.198008	0.949076	0.12658	0.83929
LTR32_BT	1446	12	1.75631	0.0955141	0.960457	0.0744066	0.828742
MamRTE1	6660	46	1.4341	0.0278049	0.988324	0.0173916	0.809289
Kanga1	675	6	2.04462	0.165093	0.940263	0.133145	0.807175
MLT1G3-int	201	2	2.79301	0.291491	0.906121	0.291491	0.793329
MER94B	344	3	2.39264	0.235674	0.911189	0.235674	0.79001
CR1-12_AMi	102	1	3.86625	0.403141	0.90568	0.403141	0.769727
Zaphod2	542	5	2.18324	0.208035	0.939205	0.144984	0.7681
MLT2E	338	3	2.35321	0.24304	0.907068	0.24304	0.758461
LTR18A_BT	676	6	1.96584	0.179071	0.92975	0.15123	0.728406
MER105	573	5	2.12258	0.215446	0.932435	0.157127	0.723877
LTR67B	2506	19	1.59785	0.0860577	0.968611	0.0531872	0.720222
LTR45B_BT	104	1	3.65351	0.420779	0.896368	0.420779	0.702749
OldhAT1	3541	25	1.51199	0.0684903	0.971105	0.0460878	0.694488
MER4B-int	350	3	2.25022	0.263657	0.895139	0.263657	0.677421
LTR41C	576	5	2.05889	0.22457	0.924401	0.171143	0.675804
MamGypLTR3a	727	6	1.91289	0.190071	0.921569	0.164819	0.674757
L2-2_Mam	364	3	2.24021	0.265769	0.893873	0.265769	0.669668
Tigger13a	2208	17	1.58758	0.0996187	0.958555	0.0701596	0.667939
HAL1	14502	98	1.30159	0.0175713	0.992847	0.00956552	0.667453
MLT1J-int	1233	10	1.73678	0.157079	0.941682	0.109611	0.640224
MER119	986	8	1.78805	0.176125	0.929429	0.137653	0.632296
UCON35	120	1	3.39815	0.444124	0.883113	0.444124	0.622066
X5a_DNA	249	2	2.45528	0.345148	0.875351	0.345148	0.598693
X4a_DNA	121	1	3.3119	0.452545	0.878127	0.452545	0.594898
MamTip1	459	4	2.1863	0.298997	0.917799	0.198509	0.591706
MER90a	1089	9	1.77842	0.196635	0.939276	0.117167	0.586683
BtERVF2_LTR	232	2	2.43053	0.349594	0.872672	0.349594	0.584819
UCON37	124	1	3.23802	0.46002	0.873579	0.46002	0.57163
MERX	247	2	2.40101	0.355036	0.869271	0.355036	0.568296
L1MB2	6384	45	1.36792	0.0563052	0.974818	0.0359661	0.564734
ORSL-2a	249	2	2.38837	0.357399	0.867792	0.357399	0.56125
LTR90A	252	2	2.38365	0.358288	0.867229	0.358288	0.558624
L1ME3G	11085	73	1.3081	0.0376055	0.984313	0.0212218	0.552048
MER45C	869	7	1.79813	0.225811	0.917336	0.163203	0.547052
MER46C	2202	16	1.53438	0.132466	0.940599	0.097848	0.542235
MER113A	1181	9	1.70589	0.20675	0.924933	0.13964	0.527464
CHR-1	132	1	3.09378	0.475326	0.86393	0.475326	0.526301
Tigger2	908	7	1.76566	0.23221	0.910647	0.173628	0.52011
MLT1M	1203	9	1.66781	0.214097	0.91605	0.153129	0.49398
X17_LINE	766	6	1.86425	0.288355	0.913135	0.178468	0.485304
MER130	134	1	2.94245	0.492414	0.852673	0.492414	0.479047
X6A_LINE	950	7	1.71475	0.243855	0.898986	0.191382	0.476811
Chompy-6_Croc	143	1	2.87591	0.50035	0.8472	0.50035	0.458311
LTR41	921	7	1.68447	0.251771	0.891301	0.202832	0.450619
Charlie13b	278	2	2.14089	0.408348	0.834019	0.408348	0.42717
Charlie7a	810	6	1.74218	0.307429	0.88736	0.218273	0.410263
MER96	823	6	1.73855	0.308157	0.886478	0.219585	0.407901
Tigger23a	370	3	2.16742	0.438778	0.884181	0.281817	0.399247
MamGypLTR3	367	3	2.16567	0.438937	0.883939	0.282217	0.398655
SINE2-3_BT	21456	128	1.21649	0.0389878	0.981894	0.0226435	0.398377
Tigger19b	2496	17	1.46522	0.194304	0.924897	0.1185	0.39213
Charlie9	827	6	1.71105	0.313917	0.879554	0.22983	0.389908
Plat_L3	2036	14	1.48199	0.206671	0.909566	0.145513	0.388605
MLT1E	799	6	1.70444	0.315366	0.877828	0.232375	0.385562
L3	33484	197	1.18533	0.0273046	0.987846	0.0147276	0.38357
LTR53	365	3	2.08868	0.446928	0.872489	0.300532	0.371656
X7B_LINE	568	4	1.79053	0.367341	0.849093	0.306653	0.36551
UCON73	158	1	2.57194	0.539675	0.818364	0.539675	0.365065
MER68B	372	3	2.06874	0.44924	0.869297	0.305509	0.364464
AmnSINE1	1905	13	1.5041	0.245034	0.909114	0.148682	0.359685
ORSL-2b	554	4	1.7779	0.370543	0.846022	0.311059	0.35794
MER63A	2204	15	1.45701	0.223194	0.907858	0.145597	0.353672
UCON40	157	1	2.52646	0.546037	0.81341	0.546037	0.351365
Charlie8	3102	21	1.40656	0.20178	0.924542	0.113787	0.34212
LTR81C	395	3	2.00268	0.457611	0.858022	0.322721	0.340159
UCON8	160	1	2.48895	0.551411	0.809134	0.551411	0.340098
LTR82A	928	7	1.67415	0.34981	0.888547	0.206881	0.339128
MER45A	2712	18	1.42016	0.214217	0.913411	0.132629	0.338624
X9b_DNA	403	3	1.97999	0.460751	0.853886	0.3289	0.331652
MER106B	679	5	1.77349	0.400649	0.872707	0.253161	0.328351
CHR-2B	34444	204	1.17082	0.0374361	0.983296	0.0200048	0.324596
MER58B	6091	39	1.30694	0.14494	0.940435	0.0821294	0.323941
EUTREP8	166	1	2.41751	0.561919	0.800585	0.561919	0.318796
MER3	8459	52	1.26948	0.119061	0.946633	0.0710157	0.318155
Tigger2f	1514	11	1.49537	0.283989	0.885899	0.187458	0.317361
MER5C1	416	3	1.9347	0.467442	0.845198	0.341663	0.314456
MLT1F1	2761	19	1.40408	0.228395	0.912429	0.132485	0.314003
LTR101_Mam	673	5	1.74139	0.405286	0.864801	0.264759	0.313885
X8_LINE	169	1	2.39595	0.565169	0.797885	0.565169	0.312403
LTR41B	677	5	1.72678	0.407605	0.861027	0.270218	0.307165
MER20B	2830	19	1.39224	0.230699	0.906936	0.139779	0.304089
L1ME2z	5477	36	1.29785	0.158053	0.92736	0.0998655	0.301348
CR1-3_Croc	711	5	1.71188	0.410136	0.857051	0.2759	0.300204
MLT1F-int	401	3	1.8932	0.474054	0.836732	0.35387	0.298506
CR1-L3A_Croc	173	1	2.34562	0.57287	0.791405	0.57287	0.297585
Charlie1b	2525	17	1.4071	0.258322	0.900925	0.150998	0.289646
LTR6_BT	169	1	2.29981	0.580007	0.785316	0.580007	0.284238
AmnL2-1	1372	9	1.50075	0.328632	0.8627	0.228893	0.283054
Charlie1a	4591	31	1.30495	0.186928	0.915473	0.117474	0.279669
L1MB5	7339	48	1.2596	0.146433	0.932869	0.088978	0.277809
MLT1F1-int	164	1	2.26927	0.58484	0.781139	0.58484	0.275415
L1MB7	16287	103	1.19961	0.0921971	0.959642	0.0501008	0.271831
X15_LINE	181	1	2.25632	0.587015	0.779135	0.587015	0.2716
LTR40b	1012	7	1.54016	0.375297	0.845505	0.267298	0.265197
LTR16D1	175	1	2.22323	0.592371	0.77441	0.592371	0.262122
ERV2-2B_BT-LTR	168	1	2.20305	0.59566	0.771495	0.59566	0.25639
L4_C_Mam	3249	21	1.34177	0.262257	0.892123	0.156265	0.24654
MER92D	182	1	2.16126	0.602736	0.76497	0.602736	0.244471
X12_LINE	190	1	2.14355	0.605786	0.762111	0.605786	0.239449
Tigger9a	753	5	1.58247	0.438019	0.817023	0.330797	0.237394
ERV1-1B-LTR_BT	4192	27	1.29204	0.235711	0.890873	0.151311	0.232003
MLT1N2	3474	22	1.33069	0.274732	0.891173	0.156186	0.231268
MamTip2b	3890	24	1.30496	0.251365	0.885333	0.16121	0.230284
Charlie4	870	6	1.60783	0.462058	0.849337	0.272789	0.22972
L1ME4a	15591	93	1.19009	0.124734	0.943753	0.0695296	0.226977
MER63C	722	5	1.56062	0.443874	0.809184	0.341098	0.226502
LTR33C	758	5	1.55767	0.444726	0.80808	0.34251	0.225006
Tigger16b	893	6	1.59433	0.463844	0.844834	0.278965	0.224515
Charlie31a	467	3	1.6999	0.512456	0.789141	0.417865	0.222243
L1MC5	11002	68	1.20896	0.160741	0.929831	0.0887353	0.217332
LTR84a	470	3	1.68141	0.516823	0.783802	0.424645	0.214899
MADE2	1614	10	1.41076	0.369693	0.835266	0.259242	0.214554
X1_DNA	471	3	1.67697	0.51789	0.782499	0.426289	0.213139
LTR50	2007	13	1.37437	0.344327	0.850088	0.227316	0.212424
Charlie10b	197	1	2.03195	0.625414	0.743362	0.625414	0.208493
MER45R	573	4	1.71103	0.545571	0.828489	0.335543	0.203905
Charlie17a	592	4	1.70879	0.545854	0.827851	0.336398	0.203233
MER126	199	1	2.01131	0.629171	0.739655	0.629171	0.202868
X26_DNA	587	4	1.68991	0.548099	0.822495	0.343696	0.19767
BTLTR1D2	538	4	1.68054	0.54921	0.819802	0.347386	0.194916
MamRep1894	297	2	2.06963	0.659123	0.822255	0.424856	0.189972
X6a_DNA	607	4	1.65827	0.552275	0.813077	0.356311	0.188144
Charlie30a	295	2	2.04288	0.661138	0.817595	0.431271	0.185208
LTR5_BT	936	6	1.47781	0.485843	0.799742	0.338281	0.176646
MLT1J2	4591	28	1.25561	0.295294	0.867277	0.179386	0.17396
LTR90B	316	2	1.91003	0.672754	0.791896	0.465156	0.160713
MLT2B4	3197	20	1.27969	0.383283	0.843408	0.218626	0.14818
LTR10B_BT	3764	23	1.24707	0.359908	0.834233	0.224969	0.14137
LTR80A	320	2	1.80777	0.683594	0.768986	0.493611	0.141118
L1M6B	336	2	1.78012	0.686874	0.762202	0.501709	0.135714
hAT-5_Mam	665	4	1.48785	0.583673	0.752077	0.432934	0.134039
MLT1L	7677	45	1.19007	0.292967	0.862316	0.174397	0.133855
MER121	782	5	1.5259	0.605273	0.795941	0.35811	0.132936
LTR73_BT	335	2	1.7402	0.691812	0.752052	0.513656	0.127889
L1MB8	12388	75	1.15709	0.261982	0.883383	0.141669	0.122456
MER52-int	323	2	1.70701	0.696127	0.743246	0.523835	0.121362
LTR11_BT	1963	12	1.28544	0.525234	0.780527	0.31681	0.101307
MARNA	2023	12	1.28078	0.526325	0.77696	0.321029	0.0995194
MER53	4934	28	1.19618	0.414283	0.808082	0.249368	0.098904
L2	44415	248	1.09608	0.184068	0.913954	0.0969423	0.0972827
MLT2F	1455	9	1.32412	0.579978	0.770434	0.345652	0.0958273
MER21C_BT	3303	20	1.22091	0.466703	0.790859	0.281153	0.0953031
Kanga1d	494	3	1.6163	0.741595	0.763709	0.449504	0.0899349
LTR8_BT	373	2	1.54403	0.720909	0.693476	0.577716	0.0890669
hAT-1_Mam	988	6	1.38395	0.650372	0.753978	0.394381	0.0875873
Charlie29b	1012	6	1.37874	0.651133	0.751148	0.397724	0.0863356
MER34A	5230	30	1.17802	0.433659	0.795104	0.262123	0.0857666
LTR82B	869	5	1.34642	0.637396	0.710973	0.459499	0.0839331
LTR81A	506	3	1.56269	0.746057	0.745571	0.471149	0.081939
L1MC4	17797	103	1.11734	0.318636	0.856539	0.167682	0.079506
Charlie10	1009	6	1.34732	0.656155	0.73347	0.418397	0.0787035
L1ME4c	6269	36	1.16126	0.474973	0.79621	0.255541	0.0697396
MER90	520	3	1.47915	0.754689	0.714112	0.507066	0.0690325
Cheshire	1027	6	1.30658	0.664116	0.708753	0.446523	0.0685766
MER31B	1176	7	1.31769	0.679953	0.734415	0.405317	0.0666751
Arthur1C	557	3	1.44587	0.758778	0.700341	0.522154	0.063772
MLT1K	11666	65	1.11792	0.430661	0.799863	0.237623	0.0588368
MER89	1227	7	1.26504	0.688841	0.698733	0.445636	0.0549065
MamGypLTR1b	702	4	1.41607	0.784633	0.720296	0.469855	0.0528663
Kanga1a	586	3	1.33562	0.774976	0.649526	0.575162	0.0462234
Charlie18a	1607	9	1.24576	0.720521	0.713449	0.411493	0.0451291
Charlie16a	749	4	1.33887	0.792126	0.681367	0.512752	0.0426092
Tigger22N1	747	4	1.33562	0.792496	0.679616	0.51463	0.0421691
MER117	2617	14	1.16291	0.675345	0.6855	0.416175	0.0371192
Arthur2	753	4	1.29144	0.798031	0.654825	0.540706	0.0361531
Arthur1A	784	4	1.28909	0.798371	0.653418	0.542139	0.035828
MamGypsy2-I	1633	9	1.19506	0.728434	0.670447	0.45873	0.0353769
MER58D	935	5	1.30252	0.812126	0.685295	0.48783	0.0344611
LFSINE_Vert	1892	10	1.18308	0.741215	0.67045	0.451901	0.031544
MLT1J	10243	56	1.09494	0.575873	0.734408	0.31212	0.0313631
LTR39_BT	2013	11	1.15017	0.756444	0.646951	0.471082	0.0244689
EuthAT-2	949	5	1.21737	0.821568	0.629348	0.546578	0.0242212
MER103C	5840	31	1.10397	0.708005	0.687862	0.379313	0.0214004
LTR91A	1389	7	1.14319	0.850495	0.59977	0.549725	0.0135782
L1MEj	1505	8	1.1412	0.858057	0.609071	0.530889	0.0126686
LTR39B_BT	1820	10	1.13821	0.870837	0.625466	0.499389	0.0112179
CHR-2	14174	76	1.04948	0.723512	0.647867	0.396289	0.00979391
Tigger19a	2337	12	1.12274	0.881946	0.6244	0.489535	0.00911264
L4_B_Mam	2122	11	1.11666	0.87774	0.61001	0.509458	0.00901562
L1ME5	1906	10	1.11092	0.873271	0.595938	0.529573	0.00893079
HAL1ME	4723	25	1.08044	0.837136	0.626916	0.451615	0.00861783
MLT1H1	2668	14	1.08821	0.892113	0.593756	0.512491	0.0060465
MLT1F2	4584	24	1.04504	0.918183	0.560686	0.520884	0.00235638
AmnSINE2	534	2	1.14682	1	0.516085	0.734941	0
ARLTR2	15	0	12.5299	1	0.928083	1	0
BLACKJACK	1711	9	1.10643	1	0.583102	0.549126	0
BtERVF2_I-int	424	2	1.16021	1	0.524042	0.728932	0
BTLTR1C1	36	0	4.41762	1	0.802862	1	0
BTLTR1C	251	1	1.276	1	0.538173	0.790411	0
BTLTR1D	38	0	4.65725	1	0.811691	1	0
BTLTR1E	123	0	1.47016	1	0.510267	1	0
BTLTR1E1	92	0	1.91552	1	0.597522	1	0
BTLTR1E3	36	0	5.09247	1	0.826503	1	0
BTLTR1J1	48	0	3.88443	1	0.77762	1	0
BTLTR1J2	31	0	5.75877	1	0.845553	1	0
BTLTR1J3	41	0	4.54702	1	0.807249	1	0
BTLTR1J4	148	0	1.26547	1	0.457135	1	0
Charlie10a	231	1	1.73043	1	0.680629	0.684316	0
Charlie11	106	0	1.76338	1	0.571051	1	0
Charlie12	3	0	51.6644	1	0.985623	1	0
Charlie13a	436	2	1.31728	1	0.603637	0.663169	0
Charlie21a	477	2	1.20821	1	0.549874	0.708429	0
Charlie26a	338	1	1.18144	1	0.497607	0.815238	0
Charlie5	2341	11	1.00872	1	0.474502	0.641299	0
Charlie7b_Mars	59	0	3.25356	1	0.739744	1	0
CR1-11_Crp	36	0	5.46862	1	0.83738	1	0
CR1-13_AMi	69	0	2.84944	1	0.708181	1	0
CR1-16_AMi	250	1	1.57772	1	0.640386	0.717635	0
CR1-1_Amn	43	0	4.54376	1	0.806913	1	0
CR1-L3B_Croc	31	0	6.39462	1	0.859742	1	0
ERV1-1C-LTR_BT	2945	16	1.0618	1	0.565455	0.53421	0
ERV2-2-I_BT	153	1	1.99689	1	0.737589	0.631533	0
ERV2-2-LTR_BT	87	0	2.10976	1	0.626679	1	0
ERV2-3-I_BT	196	1	1.61073	1	0.650174	0.709996	0
Eulor11	82	0	2.4073	1	0.664077	1	0
Eulor1	65	0	3.02594	1	0.722784	1	0
Eulor6A	24	0	8.04209	1	0.887742	1	0
Eulor6B	58	0	3.38078	1	0.748233	1	0
Eulor6C	18	0	10.7059	1	0.915511	1	0
Eulor6D	57	0	3.44666	1	0.752455	1	0
Eulor6E	24	0	8.03463	1	0.887644	1	0
Eulor9C	93	0	2.17583	1	0.635353	1	0
EuthAT-N1a	38	0	5.16662	1	0.828518	1	0
Eutr2B	41	0	4.7096	1	0.813223	1	0
EUTREP16	245	1	1.64373	1	0.658573	0.702947	0
EutTc1-N1	42	0	4.61182	1	0.809568	1	0
EutTc1-N2	123	0	1.59299	1	0.537367	1	0
FordPrefect_a	192	0	1.01937	1	0.37782	1	0
HERV16-int	1381	7	1.09642	1	0.555561	0.593064	0
Kanga11a	634	3	1.24442	1	0.600592	0.622503	0
L1M3a	545	2	1.04409	1	0.453991	0.780322	0
L1ME3	6560	34	1.01831	1	0.52068	0.547876	0
L1ME3C	1942	10	1.08193	1	0.562881	0.56253	0
L1ME3D	2424	12	1.01589	1	0.486573	0.62542	0
L1ME3F	2716	14	1.04383	1	0.531989	0.573947	0
L1MEg	8935	47	1.00725	1	0.501346	0.556946	0
L1P5	129	0	1.58223	1	0.534944	1	0
L2-1_Crp	25	0	7.71274	1	0.883064	1	0
LTR108a_Mam	60	0	3.18667	1	0.735017	1	0
LTR108b_Mam	41	0	4.59939	1	0.809215	1	0
LTR108c_Mam	34	0	5.46375	1	0.837505	1	0
LTR108d_Mam	63	0	2.99981	1	0.72088	1	0
LTR108e_Mam	115	0	1.66832	1	0.55285	1	0
LTR109B	192	0	0.999188	1	0.370483	1	0
LTR10A_BT	1629	8	1.03902	1	0.501996	0.634549	0
LTR10_EC	399	2	1.42726	1	0.650612	0.620189	0
LTR13B_BT	1512	7	1.02601	1	0.482737	0.660664	0
LTR18C_BT	70	0	2.74934	1	0.699302	1	0
LTR2C_BT	181	1	1.93127	1	0.724807	0.643972	0
LTR39C2_BT	1004	5	1.15246	1	0.580843	0.594473	0
LTR39D_BT	1403	7	1.07866	1	0.537882	0.609893	0
LTR3_BT	105	0	1.73669	1	0.566206	1	0
LTR40c	435	2	1.32625	1	0.607717	0.659566	0
LTR45	11	0	16.664	1	0.946607	1	0
LTR46_BT	183	0	1.00483	1	0.372689	1	0
LTR52-int	156	0	1.19035	1	0.434988	1	0
LTR53B	148	0	1.26439	1	0.456832	1	0
LTR58	3	0	51.2908	1	0.985519	1	0
LTR69	1	0	101.822	1	0.995113	1	0
LTR71_BT	141	0	1.38777	1	0.489856	1	0
LTR73	1	0	102.312	1	0.995137	1	0
LTR73B_BT	167	0	1.1539	1	0.423514	1	0
LTR75_1	43	0	4.58796	1	0.808579	1	0
LTR75	180	0	1.05849	1	0.39181	1	0
LTR77	21	0	9.2601	1	0.902282	1	0
LTR81	229	1	1.72726	1	0.679881	0.684972	0
LTR81AB	153	0	1.29315	1	0.464731	1	0
LTR86B2	174	0	1.1199	1	0.412511	1	0
LTR91	949	4	1.04564	1	0.480936	0.702329	0
LTR9B_EC	383	2	1.48015	1	0.670869	0.60054	0
MamGypLTR1a	665	3	1.19106	1	0.568823	0.651531	0
MamGypLTR2b	512	2	1.17167	1	0.530065	0.724137	0
Mam_R4	410	2	1.44602	1	0.657899	0.613174	0
MamRep1527	852	4	1.15288	1	0.564481	0.628907	0
MamRep1879	811	4	1.24766	1	0.628344	0.567593	0
MamRep434	1261	6	1.10822	1	0.55657	0.603298	0
MARE4	196	0	1.03774	1	0.384311	1	0
MARE8	138	0	1.45753	1	0.506905	1	0
MER104	1415	7	1.1422	1	0.598851	0.550637	0
MER121B	55	0	3.5588	1	0.759361	1	0
MER125	128	0	1.56949	1	0.532267	1	0
MER127	157	0	1.25909	1	0.455139	1	0
MER132	36	0	5.48596	1	0.837848	1	0
MER133A	38	0	5.26701	1	0.831487	1	0
MER133B	27	0	7.3126	1	0.876741	1	0
MER134	69	0	2.88304	1	0.711027	1	0
MER136	26	0	7.34415	1	0.877403	1	0
MER58C	1818	8	1.00038	1	0.457216	0.675121	0
MER67B	369	1	1.0403	1	0.429574	0.853034	0
MER67C	1260	6	1.07237	1	0.52327	0.634438	0
MER68	1226	6	1.08507	1	0.535289	0.623327	0
MER68C	117	0	1.65101	1	0.549371	1	0
MER76-int	147	0	1.25493	1	0.45417	1	0
MER83A-int	20	0	9.48105	1	0.904658	1	0
MER83B-int	44	0	4.53306	1	0.806407	1	0
MER87A2_BT	151	0	1.25715	1	0.454714	1	0
MER88	144	0	1.33007	1	0.474892	1	0
MER91C	990	4	1.03826	1	0.474722	0.707498	0
MER92A	177	0	1.10013	1	0.405965	1	0
MER92B	558	2	1.03332	1	0.447019	0.785149	0
MER92C	126	0	1.50669	1	0.518551	1	0
MER97a	197	1	1.90184	1	0.71879	0.649686	0
MER97d	94	0	1.9937	1	0.609591	1	0
MLT1A-int	315	1	1.19464	1	0.503583	0.811711	0
MLT1C-int	97	0	1.92207	1	0.598354	1	0
MLT1E1A-int	72	0	2.55423	1	0.680385	1	0
MLT1E1-int	25	0	7.38663	1	0.878242	1	0
MLT1E2-int	106	0	1.74894	1	0.568423	1	0
MLT1E3-int	46	0	3.98178	1	0.782595	1	0
MLT1E-int	20	0	8.81515	1	0.897855	1	0
MLT1F2-int	181	0	1.01781	1	0.377431	1	0
MLT1G-int	148	0	1.26841	1	0.457964	1	0
MLT1H1-int	223	1	1.67822	1	0.66774	0.695374	0
MLT1H2	3483	17	1.02688	1	0.513944	0.582003	0
MLT1H	7093	36	1.02078	1	0.52824	0.538479	0
MLT1H-int	643	3	1.18777	1	0.566833	0.653325	0
MLT1J1-int	337	1	1.12708	1	0.472709	0.829648	0
MLT1J2-int	367	1	1.02824	1	0.423302	0.856289	0
MLT1K-int	84	0	2.31968	1	0.653819	1	0
MLT1L-int	54	0	3.5108	1	0.756596	1	0
MLT1M-int	1	0	101.51	1	0.995098	1	0
MLT1O-int	4	0	39.3365	1	0.979919	1	0
MLT2B2	962	4	1.00364	1	0.445139	0.731694	0
MLT2B3	127	0	1.49387	1	0.515615	1	0
Oamar1	26	0	6.99417	1	0.871695	1	0
OldhAT-N1a	11	0	16.578	1	0.946338	1	0
OldhAT-N1b	10	0	18.3884	1	0.95188	1	0
OldhAT-N1c	1	0	102.877	1	0.995163	1	0
Tigger12	596	3	1.32765	1	0.645498	0.579182	0
Tigger17	71	0	2.63581	1	0.688581	1	0
Tigger17d	386	1	1.01791	1	0.417748	0.859119	0
Tigger1a_Mars	140	0	1.37566	1	0.486821	1	0
Tigger20a	863	4	1.13977	1	0.554904	0.637694	0
Tigger2a	6	0	28.9927	1	0.970939	1	0
Tigger2a_Car	87	0	2.31376	1	0.652973	1	0
Tigger6	224	1	1.74082	1	0.683185	0.682113	0
Tigger8	645	3	1.22056	1	0.586686	0.635368	0
UCON11	47	0	4.11843	1	0.788875	1	0
UCON15	40	0	4.8889	1	0.819504	1	0
UCON33	98	0	1.99473	1	0.609584	1	0
UCON34	222	1	1.82977	1	0.703468	0.663939	0
UCON38	141	0	1.41213	1	0.495909	1	0
UCON39	75	0	2.65926	1	0.690619	1	0
UCON4	141	0	1.41697	1	0.497096	1	0
UCON44	227	1	1.74847	1	0.684978	0.680531	0
UCON80	32	0	6.1059	1	0.853493	1	0
UCON81	31	0	6.44727	1	0.860801	1	0
UCON86	91	0	2.18892	1	0.637157	1	0
UCON97	39	0	5.05371	1	0.824937	1	0
X10b_DNA	146	0	1.38159	1	0.488186	1	0
X11_DNA	159	0	1.24281	1	0.450442	1	0
X13_LINE	103	0	1.90758	1	0.5958	1	0
X1_LINE	64	0	2.96729	1	0.718238	1	0
X1_LR	14	0	13.5068	1	0.933391	1	0
X20_LINE	121	0	1.62915	1	0.544865	1	0
X21_LINE	39	0	4.97311	1	0.822375	1	0
X23_DNA	58	0	3.37756	1	0.748027	1	0
X2b_DNA	105	0	1.92622	1	0.598715	1	0
X2_LINE	150	0	1.30979	1	0.469328	1	0
X32_DNA	235	1	1.69503	1	0.671885	0.691822	0
X33a_DNA	76	0	2.53751	1	0.678439	1	0
X34_DNA	67	0	2.97815	1	0.718913	1	0
X5B_LINE	55	0	3.67986	1	0.766252	1	0
X6b_DNA	527	2	1.14894	1	0.517307	0.734011	0
X7C_LINE	398	1	1.0177	1	0.417577	0.859195	0
X7D_LINE	25	0	7.91166	1	0.885823	1	0
X9_LINE	538	2	1.13996	1	0.512156	0.737938	0
Zaphod5a	54	0	3.57516	1	0.760394	1	0
Zaphod5b	45	0	4.3587	1	0.799415	1	0
L1M4a1	2024	10	0.995405	0.880158	0.454983	0.664368	-0.000368379
LTR16E1	1786	8	0.989539	0.867829	0.444355	0.686506	-0.00093406
Tigger18a	979	4	0.984787	0.82406	0.428529	0.744912	-0.00185874
LTR33A	1606	7	0.975688	0.86024	0.426756	0.709691	-0.00232157
MER74A	1374	6	0.972674	0.850855	0.422188	0.722988	-0.00280376
MLT-int	197	0	0.989403	0.631143	0.366801	1	-0.00307187
MamRep38	1240	5	0.969126	0.839302	0.416849	0.739013	-0.00344226
LTR102_Mam	393	1	0.976064	0.728675	0.395053	0.870453	-0.0048047
LTR104_Mam	1045	4	0.953397	0.824934	0.400178	0.76689	-0.00575466
LTR33A_	1245	5	0.938486	0.840734	0.386189	0.763401	-0.00690072
MER87B_BT	3244	15	0.947843	0.805909	0.383614	0.708762	-0.00724226
MLT1E1	1034	4	0.941206	0.825525	0.389016	0.77536	-0.00727922
MLT1G3	2427	11	0.953941	0.777105	0.398409	0.709754	-0.00745042
MLT1C	5702	27	0.95318	0.780082	0.376342	0.693482	-0.00746161
MER97b	196	0	0.973615	0.631188	0.360914	1	-0.00770914
L1ME3B	5002	24	0.949217	0.768127	0.37229	0.70112	-0.00861429
Charlie29a	609	2	0.945235	0.776279	0.387225	0.824592	-0.00893656
MER58A	10045	47	0.952975	0.72198	0.352028	0.700243	-0.00983108
MER68-int	194	0	0.961858	0.631278	0.356487	1	-0.0112084
MER34-int	622	2	0.929239	0.777013	0.375819	0.831724	-0.0116012
X4b_DNA	424	1	0.940847	0.729491	0.375092	0.880017	-0.01205
LTR79	2365	10	0.925888	0.769285	0.361188	0.746257	-0.0126546
MER34A1	3423	15	0.93251	0.715489	0.358562	0.730839	-0.0146573
MER87_BT	1874	8	0.9219	0.74646	0.361571	0.756842	-0.0148987
MER89-int	405	1	0.921461	0.73022	0.364	0.885208	-0.0161131
LTR16D2	207	0	0.937971	0.631736	0.34709	1	-0.0184276
X24_LINE	449	1	0.904155	0.731225	0.353638	0.889918	-0.0197613
X9a_DNA	443	1	0.900479	0.731438	0.351487	0.890895	-0.0205411
Charlie17	432	1	0.898359	0.73155	0.350278	0.891446	-0.0209927
Tigger9b	665	2	0.868402	0.781949	0.331119	0.858523	-0.0217452
MER74C	208	0	0.923605	0.632102	0.341426	1	-0.0228402
MLT1F	3356	15	0.913399	0.631447	0.327514	0.757716	-0.0260925
LTR9_BT	435	1	0.872261	0.733505	0.33458	0.898409	-0.0265384
X30_DNA	461	1	0.870291	0.733731	0.333269	0.898966	-0.0269504
Looper	437	1	0.859116	0.734711	0.326542	0.901895	-0.0293306
MER77B	1073	4	0.887082	0.671056	0.33824	0.812512	-0.0299467
ERV1-2-LTR_BT	866	3	0.880973	0.638393	0.337194	0.830157	-0.0356359
MER63B	2067	8	0.870095	0.636941	0.296895	0.808357	-0.0393281
Mariner1_BT	8287	36	0.906053	0.527379	0.255087	0.794665	-0.0395509
Charlie2b	2619	11	0.88689	0.585135	0.303061	0.790217	-0.0403051
ERV2-3-LTR_BT	209	0	0.864601	0.634715	0.317337	1	-0.0414376
L1MEh	1756	7	0.868648	0.617618	0.301399	0.810842	-0.0425164
MLT1-int	224	0	0.853472	0.635531	0.312453	1	-0.0449998
LTR13_BT	924	3	0.846554	0.640421	0.307388	0.84947	-0.0465113
Charlie6	215	0	0.840958	0.636379	0.307213	1	-0.0490503
MER96B	1630	6	0.859548	0.596113	0.297573	0.820816	-0.0490572
L1MEg1	665	2	0.859206	0.594216	0.324213	0.862506	-0.0494892
MamTip3	695	2	0.857709	0.59427	0.323011	0.863182	-0.0500491
CHR-2_BT	23727	109	0.920781	0.376279	0.185685	0.838833	-0.0505443
LTR84b	692	2	0.847552	0.594447	0.31534	0.86755	-0.0539023
Tigger2a_Art	6323	27	0.888084	0.473309	0.242733	0.812167	-0.0556257
L1M4a2	2129	9	0.85103	0.555449	0.266422	0.827035	-0.0594258
LTR16D	714	2	0.828883	0.595325	0.301063	0.875531	-0.0609877
LTR16A2	1402	5	0.835196	0.571526	0.279343	0.842371	-0.0631252
MamTip2	3091	12	0.854736	0.517815	0.252075	0.827861	-0.0647248
LTR86A2	248	0	0.790365	0.641403	0.284565	1	-0.0654615
MER31-int	2054	8	0.836044	0.537587	0.255015	0.840133	-0.0696383
X2a_DNA	264	0	0.767262	0.644384	0.273884	1	-0.0729465
L1MC3	10455	49	0.885321	0.381479	0.179732	0.854743	-0.0735471
MamTip1b	264	0	0.756085	0.645952	0.268704	1	-0.0765613
Tigger17a	1813	7	0.824012	0.516406	0.249146	0.849556	-0.0801508
Tigger1a_Art	5245	22	0.856488	0.435707	0.204603	0.849022	-0.0806385
MER106A	489	1	0.811119	0.528327	0.296316	0.914515	-0.0836874
BTLTR1F	415	1	0.807754	0.528146	0.2945	0.91529	-0.085395
L1MD3	4727	20	0.855085	0.416274	0.21107	0.846012	-0.0859672
MLT1D	15092	69	0.890895	0.303873	0.155655	0.871078	-0.0862215
Zaphod4a	273	0	0.705799	0.654595	0.244679	1	-0.092505
MamGypsy2-LTR	512	1	0.791878	0.52871	0.283918	0.919483	-0.0931791
L1MB1	5913	26	0.859023	0.369526	0.19303	0.854886	-0.0947861
Charlie24	982	3	0.801061	0.501399	0.267542	0.874099	-0.0959459
L5	503	1	0.783838	0.529015	0.27876	0.921523	-0.0971661
MER110A	500	1	0.780852	0.529157	0.276837	0.922278	-0.0986469
L1M6	3063	12	0.820086	0.446182	0.204595	0.864584	-0.100293
MER21-int	490	1	0.771785	0.529687	0.270982	0.924559	-0.103142
LTR37B	1492	5	0.789615	0.464094	0.232296	0.874235	-0.113613
LTR16E2	1483	5	0.788386	0.464202	0.231054	0.875054	-0.114328
LTR83	527	1	0.740261	0.532994	0.250155	0.932434	-0.118574
MER110	530	1	0.737123	0.533437	0.248068	0.933205	-0.12009
ERV3-16A3_I-int	4261	18	0.82584	0.344744	0.176058	0.876435	-0.127682
ERV1-1-LTR_BT	2348	9	0.801864	0.393288	0.205156	0.872623	-0.129113
MamGypLTR2c	560	1	0.708353	0.538585	0.228828	0.940161	-0.13369
BtERV3B_LTR	1242	4	0.776342	0.430235	0.231923	0.88328	-0.133784
LTR16B	558	1	0.692787	0.542181	0.218407	0.943819	-0.140775
MLT1A	7995	33	0.829437	0.237147	0.120511	0.910075	-0.168617
L1M5	35493	162	0.883373	0.11233	0.054296	0.953827	-0.169871
LTR16C	4655	18	0.798015	0.300432	0.13785	0.905832	-0.17
L1M4b	3445	14	0.794517	0.297993	0.157584	0.895997	-0.174484
ERV3-16A3_LTR	844	2	0.694031	0.459606	0.19605	0.928868	-0.177899
L1MEi	3195	12	0.776162	0.323036	0.149568	0.905154	-0.179403
Zaphod3	1074	3	0.735203	0.390193	0.209995	0.907271	-0.181384
L1MD1	4565	19	0.799523	0.267449	0.134559	0.907386	-0.18488
MLT1A0	11455	48	0.832485	0.186864	0.0872959	0.932953	-0.192684
LTR40a	1580	5	0.726255	0.377109	0.169822	0.913732	-0.19544
MER33	7547	30	0.812873	0.219822	0.106704	0.922266	-0.196654
ERV2-1C-LTR_BT	221	0	0.696097	0.411432	0.240441	1	-0.201583
MLT1J1	3597	13	0.772977	0.285708	0.138385	0.911528	-0.202126
L1MD2	8184	35	0.817642	0.195582	0.0978648	0.927499	-0.205839
Zaphod	1823	6	0.737916	0.326459	0.167388	0.910107	-0.213172
Arthur1B	1859	6	0.73636	0.326611	0.165831	0.911089	-0.214564
LTR68	287	0	0.676946	0.412201	0.230365	1	-0.21665
HERVL74-int	278	0	0.667588	0.412557	0.22575	1	-0.224162
LTR4_BT	559	1	0.685577	0.381408	0.213564	0.94549	-0.227979
MER70C	291	0	0.656241	0.413319	0.219938	1	-0.233184
Kanga1b	296	0	0.652639	0.413614	0.218079	1	-0.23604
L1M3e	291	0	0.640707	0.414649	0.212031	1	-0.24555
MER76	571	1	0.664821	0.382342	0.199576	0.950218	-0.24592
LTR107_Mam	308	0	0.638092	0.415017	0.210581	1	-0.247556
MER91A	2243	7	0.722656	0.287712	0.13997	0.923579	-0.253542
LTR16A	3149	11	0.740448	0.258132	0.118381	0.928631	-0.254984
Tigger17c	311	0	0.620873	0.417175	0.201683	1	-0.26108
Charlie14a	320	0	0.616655	0.417851	0.19944	1	-0.264324
Charlie4a	2176	7	0.710872	0.290132	0.128811	0.930585	-0.264585
X24_DNA	331	0	0.613945	0.418335	0.197969	1	-0.266378
BtERVF1_I-int	268	0	0.600253	0.420281	0.191216	1	-0.277209
ALTR39_BT	2349	8	0.721122	0.253279	0.127293	0.928796	-0.281313
LTR86A1	328	0	0.593916	0.421988	0.187489	1	-0.28165
MLT2C1	1924	6	0.712695	0.262921	0.143068	0.925232	-0.283499
L1ME2	9120	38	0.799085	0.129087	0.0675013	0.95065	-0.287701
L1MC	8201	33	0.789507	0.143236	0.0695718	0.950155	-0.287765
L1MEb	1111	3	0.677605	0.30126	0.161457	0.933015	-0.292566
LTR39A_BT	622	1	0.605659	0.393763	0.159823	0.962857	-0.292816
MLT1C2-int	324	0	0.576741	0.425931	0.178419	1	-0.294306
LTR11B_BT	840	2	0.643723	0.344151	0.157797	0.945951	-0.29439
LTR16B1	897	2	0.642173	0.344608	0.156558	0.946475	-0.295633
MLT1B-int	330	0	0.572126	0.42718	0.17593	1	-0.297578
LTR80B	342	0	0.565199	0.429192	0.172173	1	-0.30239
LTR53-int	319	0	0.562495	0.429819	0.170847	1	-0.304405
Penelope1_Vert	975	2	0.629713	0.348003	0.14725	0.950416	-0.305871
MER67A	351	0	0.551373	0.433553	0.164721	1	-0.311745
L1ME1	20665	92	0.830244	0.067299	0.0316378	0.974974	-0.314553
ERVL-E-int	5269	20	0.749743	0.152183	0.073788	0.951549	-0.339752
LTR16	2277	7	0.682373	0.23609	0.103433	0.946062	-0.345665
MLT1B	14952	61	0.806151	0.0731015	0.0374148	0.971664	-0.353181
MLT2D	3287	11	0.712836	0.176943	0.0919075	0.946275	-0.367326
L1ME3E	2474	8	0.688338	0.207743	0.097539	0.947447	-0.367724
Tigger1	5335	21	0.741516	0.137305	0.0623448	0.95924	-0.372046
L1MC2	4818	18	0.736457	0.136568	0.0707203	0.954756	-0.381594
ERVL-B4-int	2641	9	0.698061	0.183421	0.0960605	0.946547	-0.381957
ERV1-1-I_BT	2389	9	0.695229	0.183448	0.0937108	0.948028	-0.386244
MLT1E1A	2783	9	0.693021	0.183858	0.0917033	0.949272	-0.38911
LTR16A1	2048	6	0.667876	0.211493	0.103739	0.948525	-0.392912
L1MCc	2220	7	0.679203	0.187532	0.100798	0.947634	-0.405686
LTR33	6346	23	0.740576	0.110185	0.0542917	0.964234	-0.41503
LTR81B	657	1	0.597966	0.274333	0.154653	0.96441	-0.416722
Charlie22a	673	1	0.592153	0.274513	0.150785	0.965561	-0.424423
MLT1G1	2553	8	0.677333	0.167357	0.0884192	0.952983	-0.436361
LTR37A	1541	4	0.636923	0.208234	0.109661	0.95266	-0.443493
L1M	706	1	0.57689	0.275752	0.140722	0.968502	-0.444022
ERV2-1B-LTR_BT	524	1	0.576085	0.275332	0.14061	0.968561	-0.445676
L1MDb	948	2	0.585865	0.258881	0.116076	0.963069	-0.452711
LTR33B	1015	2	0.583779	0.259543	0.114575	0.963649	-0.45487
L4_A_Mam	4208	14	0.695181	0.127284	0.0577785	0.965802	-0.469581
LTR75_BT	706	1	0.540908	0.283598	0.11766	0.974957	-0.485204
BTLTR1B	1609	6	0.644386	0.167662	0.0856934	0.958701	-0.49171
MER110-int	346	0	0.542111	0.272602	0.15976	1	-0.49862
L1MB4	6725	25	0.729626	0.0759889	0.0402288	0.973638	-0.509003
LTR6B_BT	364	0	0.531606	0.272949	0.15401	1	-0.514052
LTR2B_BT	340	0	0.515347	0.273998	0.145315	1	-0.537729
BtERVF1_LTR	364	0	0.513974	0.274257	0.144464	1	-0.539498
LTR2_BT	331	0	0.512752	0.274221	0.143951	1	-0.541484
Charlie17b	379	0	0.503191	0.275704	0.138554	1	-0.554423
L2-1_AMi	394	0	0.503018	0.275798	0.138406	1	-0.554552
L1M4	19274	81	0.786986	0.0246961	0.0117936	0.991145	-0.555493
Charlie30b	396	0	0.501732	0.276004	0.137701	1	-0.556295
HAL1b	2713	8	0.639268	0.13721	0.0606021	0.96928	-0.556823
ERV2-2B_BT-I	290	0	0.494359	0.2766	0.134196	1	-0.567285
LTR105_Mam	416	0	0.468238	0.283916	0.11948	1	-0.598587
MLT1E3	1641	4	0.586045	0.163744	0.0738977	0.970183	-0.605813
MamGypLTR4	432	0	0.455764	0.288395	0.112703	1	-0.612179
LTR9A_EC	422	0	0.449461	0.290906	0.109343	1	-0.618685
MER92-int	1033	2	0.544423	0.19222	0.0887709	0.973366	-0.628252
LTR16B2	1076	2	0.537213	0.194081	0.0842794	0.974985	-0.638276
MER45B	1060	2	0.534295	0.194914	0.0825156	0.975616	-0.642188
MLT1E2	3319	10	0.630912	0.0894237	0.0407264	0.978811	-0.696749
L1MD	8674	31	0.697577	0.0300188	0.0136351	0.991262	-0.791108
Tigger12A	454	0	0.440696	0.18224	0.104563	1	-0.874026
MamGyp-int	436	0	0.439731	0.182228	0.104094	1	-0.876397
L1M3de	3240	10	0.607119	0.0574623	0.0292768	0.985261	-0.893181
LTR18B_BT	435	0	0.431903	0.182709	0.0999258	1	-0.894171
MLT1D-int	424	0	0.431288	0.182725	0.0996287	1	-0.895643
HAL1M8	1729	4	0.543615	0.0954486	0.0493902	0.981276	-0.897134
L1M3b	422	0	0.42856	0.182974	0.0981864	1	-0.901677
ERV1-3-I_BT	3480	10	0.601602	0.0580053	0.0269447	0.986542	-0.906524
MLT1I	7424	24	0.665143	0.0258135	0.0126458	0.992382	-0.934253
Charlie25	814	1	0.459941	0.142074	0.070038	0.986907	-0.949589
L1MEd	10517	38	0.697425	0.014741	0.00765035	0.995032	-0.952165
MLT1G	2205	5	0.523068	0.0528389	0.0287514	0.988836	-1.19395
L1MA10	3802	10	0.563906	0.0293932	0.0144363	0.993185	-1.26595
FordPrefect	485	0	0.380409	0.122209	0.07313	1	-1.27292
L1PB4	500	0	0.375281	0.122332	0.0705434	1	-1.29018
MLT1I-int	510	0	0.374561	0.12238	0.0701686	1	-1.29246
MamGypLTR1c	559	0	0.351407	0.12558	0.0588632	1	-1.35954
L1MEg2	558	0	0.343082	0.127869	0.0549653	1	-1.37859
MLT1C2	13169	45	0.671106	0.00390105	0.00176665	0.998882	-1.386
MER115	1704	3	0.455984	0.0581137	0.0253621	0.99239	-1.40001
L1MC1	14321	52	0.681533	0.0027105	0.00137572	0.999111	-1.41989
ERV1-2-I_BT	3170	9	0.531097	0.0195943	0.0100536	0.995569	-1.55921
L1MCb	1695	3	0.433029	0.0437	0.0183082	0.994746	-1.64157
L1_Art	61925	241	0.770373	3.91901e-05	1.93317e-05	0.999985	-1.6586
LTR31B_BT	615	0	0.308653	0.0848081	0.0397559	1	-1.81731
ERVL-int	622	0	0.302644	0.0863562	0.0372915	1	-1.83415
L1M7	1831	3	0.414431	0.0325286	0.0136081	0.99624	-1.89061
MLT2C2	1091	1	0.357974	0.0514671	0.0250908	0.996192	-1.90961
BTLTR1B1	852	1	0.352174	0.0521075	0.0233135	0.99651	-1.93189
L1MDa	5337	15	0.539314	0.00518388	0.00243579	0.998837	-2.03579
L1M8	1100	1	0.339738	0.0360384	0.01947	0.997173	-2.24785
L1ME3A	11053	34	0.59839	0.000885101	0.000406905	0.999772	-2.2618
Arthur1	1967	3	0.386486	0.0174208	0.00818729	0.997872	-2.4124
L1MC4a	7814	40	0.999379	0.937373	0.478428	0.584168	-2.51629e-05
L1MEf	7902	23	0.550852	0.000952299	0.000510063	0.999742	-2.59905
L1ME3Cz	9262	26	0.557631	0.000775817	0.000339343	0.999825	-2.62074
ERV1-3-LTR_BT	2373	4	0.401092	0.00991896	0.00562946	0.998359	-2.64065
L1M3c	1913	3	0.380018	0.0125887	0.00719557	0.998158	-2.65216
L1-2_BT	111037	460	0.772127	5.03103e-08	2.60295e-08	1	-2.72294
L1MEc	13196	42	0.595233	0.000201388	9.34177e-05	0.999947	-2.76634
L1M3d	709	0	0.259531	0.0378286	0.0215875	1	-2.76759
MLT2B1	2876	5	0.398459	0.00586215	0.00277339	0.999152	-2.9629
L1M2	9462	27	0.5457	0.000299283	0.000160994	0.999918	-3.07927
MER34B-int	1326	1	0.289284	0.0188353	0.00804134	0.998984	-3.08684
Bov-tA1	216595	909	0.793576	1.87385e-10	9.72449e-11	1	-3.24462
LTR52	809	0	0.239059	0.0256458	0.015526	1	-3.28469
L1MCa	6970	18	0.493314	0.000425165	0.000200298	0.99991	-3.43692
LTR78B	1875	2	0.315145	0.00817598	0.00420625	0.999208	-3.47752
MER67D	940	0	0.205525	0.0184918	0.0078653	1	-3.95582
L1M4c	4692	10	0.406622	0.000303556	0.000170277	0.99994	-4.5669
Charlie2a	1639	1	0.232446	0.00312923	0.00181254	0.999811	-5.27219
L1MA9	46448	158	0.633363	1.05213e-09	5.59005e-10	1	-5.91551
Bov-tA3	345315	1406	0.761652	8.63532e-18	4.26763e-18	1	-6.70258
L1M3	16123	41	0.474907	3.72019e-08	1.921e-08	1	-7.98131
ERV1-2C-LTR_BT	2667	2	0.21241	0.000217142	8.86178e-05	0.999988	-8.18765
ERV2-1-I_BT	1712	0	0.101053	0.000136632	5.27058e-05	1	-12.779
BTLTR1J	22110	32	0.303346	1.97255e-17	9.8604e-18	1	-28.7486
L1-3_BT	58431	151	0.429194	5.59676e-32	3.18627e-32	1	-38.1368
ERV2-1-LTR_BT	8097	2	0.0690121	3.4947e-16	1.76336e-16	1	-59.6162
BTLTR1	82729	54	0.1253	1.2895e-112	7.16095e-113	1	-335.282
L1_BT	88749	98	0.163754	2.79427e-132	1.48537e-132	1	-343.407
BovB	562047	1468	0.197276	2.12487e-200	9.53373e-201	1	-467.576

## Sheet: IFNG-downregulated H3K27ac
TE family	TE family size	Number of overlaps	Odds ratio	Fisher's two tail	Fisher's left tail	Fisher's right tail	Combo score
BTLTR1B	1609	88	20.8983	1.71617e-79	1	1.71617e-79	345.411
MIRb	166108	639	2.10405	7.80944e-45	1	4.42137e-45	47.3347
MIR3	62466	276	2.13037	1.45095e-25	1	9.70822e-26	27.1012
MIRc	76415	307	1.93196	6.55856e-22	1	4.11747e-22	20.1254
BTLTR1F	415	8	8.30844	1.93322e-05	0.999998	1.93322e-05	14.3984
OldhAT-N1a	11	1	77.9868	0.0253055	0.999706	0.0253055	10.036
MIR1_Amn	9606	50	2.37167	2.155e-07	1	1.4875e-07	8.30589
MLT1I-int	510	6	5.78752	0.00160408	0.99973	0.00160408	7.07901
LTR6_BT	169	3	10.1003	0.00783906	0.999245	0.00783906	7.02542
Charlie13b	278	4	7.77132	0.00437683	0.999452	0.00437683	6.97783
L2b	65106	232	1.62555	1.62727e-10	1	9.32093e-11	6.86102
LTR16D1	175	3	9.75766	0.00860052	0.999143	0.00860052	6.78826
X7B_LINE	568	6	5.41391	0.00222647	0.9996	0.00222647	6.46298
MIR	133102	417	1.48046	3.73954e-11	1	2.00525e-11	5.90226
ERV54-EC_LTR	1816	13	3.28903	0.000510409	0.999849	0.000510409	5.65469
LTR3_BT	105	2	11.6588	0.0281652	0.997661	0.0281652	5.4932
Chap1_Mam	231	3	7.45963	0.0174763	0.997734	0.0174763	5.09532
MER125	128	2	10.2751	0.0353987	0.996668	0.0353987	4.87697
UCON97	39	1	22.2674	0.0858561	0.996301	0.0858561	4.77336
X21_LINE	39	1	21.995	0.0868707	0.996212	0.0868707	4.73167
Tigger1a_Mars	140	2	9.084	0.0441444	0.995313	0.0441444	4.31381
MLT1F-int	401	4	5.1822	0.017118	0.996821	0.017118	4.19301
Tigger15a	2999	17	2.59536	0.000915439	0.999658	0.000915439	4.18059
Charlie20a	592	5	4.33107	0.0138777	0.996921	0.0138777	3.92848
Looper	437	4	4.73179	0.022913	0.995357	0.022913	3.67733
X8_LINE	169	2	7.76579	0.0581865	0.992801	0.0581865	3.65258
MamRep4096	814	6	3.71865	0.0128833	0.996677	0.0128833	3.58108
X12_DNA	856	6	3.55491	0.015702	0.995772	0.015702	3.30107
Tigger6b	186	2	6.87015	0.0719316	0.98998	0.0719316	3.17815
LTR16E2	1483	9	2.86543	0.00991188	0.996685	0.00991188	3.04335
ERV1-2-LTR_BT	866	6	3.37682	0.0196128	0.994455	0.0196128	2.99773
L2c	78346	247	1.4189	1.54676e-06	0.999999	9.11533e-07	2.93303
SINE2-1_BT	34074	116	1.53875	3.45342e-05	0.999986	2.1554e-05	2.77414
MARNA	2023	11	2.55756	0.00913923	0.996576	0.00913923	2.76249
UCON34	222	2	5.91762	0.0926143	0.985106	0.0926143	2.65049
Penelope1_Vert	975	6	3.16768	0.0256924	0.992283	0.0256924	2.64517
MER70-int	79	1	10.7637	0.169474	0.984942	0.169474	2.64271
MER91C	990	6	3.12425	0.027213	0.99172	0.027213	2.57246
MamTip2	3091	15	2.27198	0.00704202	0.997365	0.00623071	2.54822
Charlie8	3102	15	2.21348	0.00845381	0.996627	0.00778113	2.37625
Charlie5	2341	12	2.37395	0.0148997	0.995598	0.0109226	2.27858
SINE2-2_BT	46989	150	1.44286	6.20314e-05	0.999975	3.68521e-05	2.22541
MLT1F	3356	16	2.12339	0.0113588	0.99613	0.00856894	2.11263
Kanga11a	634	4	3.37165	0.0639413	0.982134	0.0639413	2.09401
LTR13B_BT	1512	8	2.51304	0.0304257	0.988536	0.0304257	2.01643
L1ME4b	15805	58	1.59563	0.00156984	0.999397	0.00098621	1.89036
MLT1H	7093	29	1.80439	0.00624459	0.997877	0.00396408	1.87715
L2d2	31234	103	1.47394	0.000445005	0.999832	0.000252734	1.87582
MER117	2617	12	2.17026	0.0226689	0.991106	0.0202924	1.83841
LTR101_Mam	673	4	3.14367	0.0779682	0.976747	0.0779682	1.83105
LTR68	287	2	4.43198	0.148115	0.96867	0.148115	1.78151
MER34A1	3423	15	2.01954	0.0194469	0.992246	0.0164196	1.73515
MER5A	27050	89	1.47368	0.000936846	0.999583	0.000627479	1.69411
Kanga1b	296	2	4.27759	0.156565	0.965764	0.156565	1.68857
LTR5_BT	936	5	2.73834	0.0720454	0.975376	0.0720454	1.66024
MER74A	1374	7	2.42784	0.0511759	0.980193	0.0511759	1.65198
LTR81A	506	3	3.37886	0.117453	0.967579	0.117453	1.63382
AmnSINE1	1905	9	2.30339	0.0464507	0.986114	0.0338404	1.60462
CHR-1	132	1	6.62817	0.260334	0.962993	0.260334	1.59479
MLT1M	1203	6	2.51198	0.0644891	0.975961	0.0644891	1.58199
AmnSINE2	534	3	3.28653	0.124666	0.964692	0.124666	1.55221
Tigger22N1	747	4	2.88255	0.098926	0.968034	0.098926	1.53451
MER130	134	1	6.35603	0.269815	0.960089	0.269815	1.51799
Tigger21a	133	1	6.34508	0.270209	0.959968	0.270209	1.51488
MamTip3B	540	3	3.19721	0.132211	0.961593	0.132211	1.47347
MamTip2b	3890	16	1.90847	0.0271292	0.989606	0.0208383	1.4607
UCON38	141	1	6.12075	0.278591	0.957281	0.278591	1.45069
L1M6B	336	2	3.83917	0.184828	0.955298	0.184828	1.42305
X10b_DNA	146	1	5.96901	0.284557	0.955311	0.284557	1.40688
ORSL-2b	554	3	3.07268	0.143742	0.956693	0.143742	1.36429
L1ME3C	1942	9	2.1462	0.0578858	0.978666	0.0487213	1.36338
MamGypLTR1c	559	3	3.05751	0.145234	0.956044	0.145234	1.35105
MER81	2544	11	2.07749	0.054883	0.984253	0.0346216	1.32969
MER92B	558	3	3.00255	0.150811	0.953594	0.150811	1.30316
L3	33484	106	1.39417	0.00204981	0.999138	0.00122785	1.28879
Charlie32a	156	1	5.55662	0.302114	0.949233	0.302114	1.28617
L2-2_Mam	364	2	3.59627	0.203822	0.947634	0.203822	1.27547
UCON73	158	1	5.51653	0.303937	0.948575	0.303937	1.2743
UCON40	157	1	5.44981	0.307012	0.947462	0.307012	1.25452
LTR47_BT	356	2	3.54513	0.208185	0.94581	0.208185	1.2444
X11_DNA	159	1	5.39305	0.309682	0.946479	0.309682	1.23763
Charlie7	2828	12	1.93677	0.0510634	0.979514	0.0420938	1.23202
L3b	6997	26	1.68285	0.02291	0.991938	0.0141555	1.23147
MamGypLTR3	367	2	3.49755	0.212366	0.944029	0.212366	1.21552
CHRL1_BT	18852	62	1.46992	0.00679132	0.99732	0.00405323	1.20486
MER92-int	1033	5	2.39077	0.110725	0.95716	0.110725	1.20184
Charlie19a	1086	5	2.38572	0.11143	0.956802	0.11143	1.19546
BtERVF1_LTR	364	2	3.38925	0.222352	0.939691	0.222352	1.14984
MER58B	6091	23	1.6944	0.0312925	0.989003	0.0195104	1.14463
LTR73B_BT	167	1	5.03518	0.32762	0.939619	0.32762	1.13018
CR1-L3A_Croc	173	1	5.03275	0.327759	0.939553	0.327759	1.12941
Tigger17d	386	2	3.311	0.229995	0.936266	0.229995	1.10248
Charlie17b	379	2	3.30322	0.230777	0.935916	0.230777	1.09778
L2-1_AMi	394	2	3.27247	0.2339	0.934487	0.2339	1.0792
MER67C	1260	6	2.33348	0.133485	0.9663	0.0845168	1.06914
ERV2-2B_BT-LTR	168	1	4.82725	0.339004	0.935026	0.339004	1.067
LTR9B_EC	383	2	3.23114	0.238199	0.932515	0.238199	1.05424
MER5B	19003	61	1.4397	0.0108896	0.995597	0.00653544	1.03208
LTR40A1	404	2	3.15237	0.246709	0.928514	0.246709	1.00681
LTR75	180	1	4.6292	0.350617	0.930117	0.350617	1.00627
X12_LINE	190	1	4.59517	0.352705	0.929198	0.352705	0.995748
Kanga1c	651	3	2.63738	0.195783	0.932238	0.195783	0.990882
Mam_R4	410	2	3.12448	0.24983	0.927023	0.24983	0.990041
MER5C1	416	2	3.11586	0.250804	0.926553	0.250804	0.98487
LTR11B_BT	840	4	2.37373	0.163138	0.937128	0.163138	0.982065
MER102a	2152	9	2.00486	0.107857	0.968301	0.0680378	0.970537
MARE4	196	1	4.46855	0.360634	0.925707	0.360634	0.95665
MamGypLTR1d	424	2	3.0246	0.261479	0.921344	0.261479	0.930204
Charlie10b	197	1	4.37369	0.3668	0.92293	0.3668	0.927266
MER63A	2204	9	1.95911	0.112017	0.963898	0.0758929	0.922385
UCON55	203	1	4.29279	0.372232	0.920424	0.372232	0.902112
CHRL	28742	88	1.35584	0.0100411	0.995779	0.0058795	0.877599
EUTREP7	202	1	4.19453	0.379032	0.917237	0.379032	0.871513
X24_LINE	449	2	2.91746	0.274867	0.914586	0.274867	0.866395
LTR9_BT	435	2	2.85897	0.282593	0.91059	0.282593	0.831762
MamTip1	459	2	2.81358	0.288805	0.907299	0.288805	0.804996
LTR11_BT	1963	8	1.9304	0.153758	0.951409	0.101364	0.771611
MER5A1	12394	40	1.45026	0.0366262	0.984804	0.022971	0.770255
MLT1H2	3483	13	1.7267	0.108126	0.962015	0.070121	0.761282
MER20	13677	44	1.4279	0.0382879	0.985334	0.0217969	0.728158
LTR81	229	1	3.72813	0.414962	0.899084	0.414962	0.725194
MLT1-int	224	1	3.72646	0.415094	0.899021	0.415094	0.724684
Charlie10a	231	1	3.72582	0.415159	0.898975	0.415159	0.724461
ERV2-3-I_BT	196	1	3.64784	0.421751	0.895482	0.421751	0.700036
Tigger9a	753	3	2.27217	0.259208	0.897599	0.259208	0.694284
Charlie15a	1597	6	1.90953	0.190967	0.920908	0.16581	0.671024
MER45A	2712	10	1.76399	0.153026	0.946409	0.102074	0.667548
MLT1K	11666	38	1.43226	0.0527161	0.979385	0.0308642	0.662402
BtERVF2_LTR	232	1	3.52562	0.432682	0.889343	0.432682	0.6614
X5a_DNA	249	1	3.49687	0.435344	0.887806	0.435344	0.652291
Arthur1A	784	3	2.21466	0.271415	0.890344	0.271415	0.64967
MER41_BT	5491	19	1.54651	0.0939637	0.958368	0.0685212	0.646028
LTR86A2	248	1	3.43007	0.441584	0.884219	0.441584	0.63125
ORSL-2a	249	1	3.42362	0.442197	0.883861	0.442197	0.629218
LTR90A	252	1	3.40905	0.443589	0.883044	0.443589	0.624621
MER112	2787	10	1.70822	0.162374	0.936002	0.118495	0.609874
LTR37-int	944	4	2.18665	0.299244	0.917707	0.1985	0.591421
Charlie16	971	4	2.18532	0.299394	0.917545	0.198777	0.590716
MamTip1b	264	1	3.26681	0.457611	0.874655	0.457611	0.579832
MamRep488	268	1	3.23638	0.460724	0.872741	0.460724	0.570259
MER119	986	4	2.14403	0.304038	0.912361	0.20776	0.568948
LTR86C	264	1	3.21037	0.463406	0.871089	0.463406	0.562099
OldhAT1	3541	12	1.61428	0.156616	0.933013	0.11696	0.556279
Tigger17a	1813	7	1.80634	0.224513	0.918824	0.160796	0.553439
ERV2-1C-LTR_BT	221	1	3.18077	0.466424	0.869286	0.466424	0.552929
MER5C	1021	4	2.10051	0.309482	0.906484	0.217738	0.545397
Zaphod4a	273	1	3.07421	0.477992	0.861823	0.477992	0.519407
MER102b	1949	7	1.76238	0.2331	0.909803	0.174874	0.517051
Charlie1b	2525	9	1.68662	0.210433	0.920416	0.146523	0.510463
MER105	573	2	2.26873	0.381178	0.852231	0.381178	0.495058
L1MB3	13491	43	1.35469	0.0761312	0.967383	0.046273	0.489835
MER96B	1630	6	1.85407	0.289829	0.91112	0.1816	0.479065
Charlie30a	295	1	2.92068	0.495535	0.850122	0.495535	0.471508
L1MEa	282	1	2.9121	0.496532	0.849459	0.496532	0.468867
BTLTR1C	251	1	2.88152	0.500128	0.847039	0.500128	0.459452
L2d	16765	50	1.3235	0.0732346	0.96707	0.0455377	0.45906
Arthur1	1967	7	1.69142	0.250101	0.892952	0.200332	0.456371
Charlie17a	592	2	2.19617	0.396473	0.841961	0.396473	0.456023
MamGypsy2-I	1633	6	1.81149	0.29566	0.902724	0.194796	0.453623
MER53	4934	16	1.5046	0.17565	0.931545	0.110845	0.445193
Tigger12	596	2	2.14728	0.40725	0.834527	0.40725	0.430133
X6a_DNA	607	2	2.13383	0.410288	0.832397	0.410288	0.423067
MER21B	1128	4	1.86943	0.349187	0.866619	0.280828	0.412435
L1ME4a	15591	47	1.31518	0.0940065	0.959386	0.0559654	0.405868
MER113A	1181	4	1.82808	0.35851	0.857605	0.294158	0.387729
Charlie9	827	3	2.09502	0.44662	0.87318	0.29915	0.373504
ALTR2C_BT	3588	12	1.4949	0.234321	0.89606	0.169855	0.36554
MER58C	1818	6	1.67228	0.323263	0.868828	0.245307	0.363819
Charlie26a	338	1	2.54422	0.544099	0.814506	0.544099	0.356101
ERV1-3-LTR_BT	2373	8	1.57911	0.292338	0.876263	0.216737	0.352042
Charlie23a	855	3	2.01767	0.45599	0.860362	0.318925	0.345372
LTR73_BT	335	1	2.50782	0.549256	0.810438	0.549256	0.345172
MLT1B-int	330	1	2.50217	0.550059	0.809805	0.550059	0.343485
MamRep1527	852	3	1.99378	0.45919	0.856099	0.325346	0.336489
MER63B	2067	7	1.66825	0.350804	0.886767	0.20942	0.335897
MER33	7547	23	1.3641	0.187751	0.914361	0.125281	0.325398
LTR39C_BT	2817	9	1.50813	0.32682	0.865409	0.225232	0.2879
LTR2_BT	331	1	2.29459	0.581373	0.783735	0.581373	0.28224
ERV2-2B_BT-I	290	1	2.28682	0.58254	0.782788	0.58254	0.280048
MADE2	1614	5	1.64047	0.424397	0.836007	0.305174	0.265812
Tigger13a	2208	7	1.52367	0.379984	0.838899	0.276104	0.255313
MLT1G	2205	7	1.52002	0.381008	0.837456	0.278027	0.253154
Charlie30b	396	1	2.16791	0.602191	0.765034	0.602191	0.245884
LTR102_Mam	393	1	2.1214	0.610134	0.757648	0.610134	0.232817
L2a	117287	307	1.13465	0.0554474	0.974592	0.0294645	0.22893
MLT1G1	2553	8	1.47521	0.411765	0.836281	0.270935	0.21615
MER91B	1047	3	1.67171	0.519557	0.780474	0.428592	0.210809
L1ME3	6560	20	1.33135	0.308735	0.879236	0.174242	0.210743
LTR105_Mam	416	1	2.03227	0.625914	0.742461	0.625914	0.208185
MER68	1226	4	1.68764	0.548687	0.821525	0.344844	0.196813
MER3	8459	24	1.28371	0.303412	0.869424	0.181131	0.186633
ALTR2B_BT	2948	9	1.42284	0.444127	0.827191	0.275591	0.17934
LTR39A_BT	622	2	1.98674	0.666065	0.806733	0.445547	0.17479
L1MB5	7339	22	1.28807	0.338844	0.86162	0.193327	0.17165
AmnL2-1	1372	4	1.60043	0.561483	0.794062	0.380937	0.170065
SINE2-3_BT	21456	58	1.19378	0.22035	0.895618	0.131394	0.167862
Charlie22a	673	2	1.91736	0.672396	0.792863	0.463589	0.16188
Tigger9b	665	2	1.88703	0.675388	0.78643	0.471764	0.15615
MER21C_BT	3303	10	1.38798	0.471203	0.822738	0.275224	0.15457
L1M	706	2	1.85825	0.678393	0.780053	0.479713	0.150646
MamTip3	695	2	1.85021	0.679247	0.778245	0.481957	0.149107
MLT1N2	3474	10	1.3658	0.475422	0.81002	0.29114	0.145233
MamGypLTR1b	702	2	1.82791	0.681692	0.773107	0.488262	0.144811
LTR18A_BT	676	2	1.82675	0.681808	0.772856	0.488583	0.144594
MamRep137	1439	4	1.48721	0.584147	0.75139	0.433599	0.133692
Tigger19b	2496	7	1.39276	0.52757	0.77823	0.353343	0.132735
MamGypLTR3a	727	2	1.75977	0.689721	0.756451	0.50819	0.131544
LTR39D_BT	1403	4	1.4684	0.588633	0.743439	0.443013	0.127562
Charlie16a	749	2	1.7249	0.694173	0.747331	0.518786	0.124687
MLT1O	2812	8	1.37791	0.551176	0.787517	0.332689	0.119648
MER63C	722	2	1.69856	0.697676	0.740195	0.526954	0.119497
MLT1F1	2761	8	1.3663	0.553279	0.780855	0.340821	0.115747
MER20B	2830	8	1.34982	0.556626	0.771048	0.352659	0.110111
Tigger14a	788	2	1.64924	0.704667	0.72606	0.542715	0.109726
MLT1J	10243	28	1.20374	0.410743	0.815718	0.240756	0.103379
Charlie7a	810	2	1.59785	0.712483	0.710353	0.559724	0.0995445
MLT1F2	4584	13	1.27187	0.542049	0.779973	0.313368	0.0922754
Cheshire	1027	3	1.61995	0.741558	0.764426	0.448423	0.0903725
Arthur1B	1859	5	1.36687	0.63272	0.721804	0.447151	0.0896295
ERV2-1-I_BT	1712	5	1.35406	0.635745	0.714831	0.455081	0.0860225
L1MB2	6384	18	1.22678	0.520939	0.782428	0.295401	0.0835113
MER91A	2243	6	1.35858	0.654439	0.739567	0.411253	0.0814044
LTR16B2	1076	3	1.55798	0.746735	0.7434	0.473481	0.0811322
Tigger1a_Art	5245	14	1.21021	0.569068	0.734665	0.361879	0.0673923
LTR72_BT	1151	3	1.46175	0.757035	0.706448	0.51531	0.0662074
LTR16	2277	6	1.29545	0.666793	0.701225	0.454859	0.0657309
LTR10B_BT	3764	10	1.23389	0.615138	0.715805	0.402156	0.0639861
MER89	1227	3	1.36778	0.770053	0.664653	0.559641	0.0512746
MamRTE1	6660	17	1.17288	0.607857	0.718168	0.370835	0.0497386
LTR37A	1541	4	1.37852	0.788132	0.701542	0.490693	0.0478877
MLT1L	7677	20	1.16907	0.633413	0.732764	0.347413	0.044693
MLT1I	7424	19	1.15237	0.629276	0.706112	0.379058	0.0411587
LTR33A	1606	4	1.31784	0.794797	0.669356	0.525406	0.0397153
Charlie4z	3595	9	1.21291	0.72523	0.685777	0.442148	0.0388532
MamSINE1	3612	9	1.20456	0.726683	0.67851	0.450056	0.0372305
MLT1E3	1641	4	1.27421	0.800638	0.644112	0.551585	0.0337591
Plat_L3	2036	5	1.26968	0.815409	0.664265	0.510304	0.0305284
LTR79	2365	6	1.26917	0.828427	0.68376	0.474054	0.0281112
LTR16A1	2048	5	1.23983	0.818809	0.644457	0.531023	0.0269256
L1MB7	16287	42	1.07863	0.688591	0.668118	0.390892	0.0176951
CHR-2_BT	23727	58	1.06711	0.681474	0.671288	0.37879	0.0156075
MER103C	5840	14	1.10982	0.890612	0.621593	0.484077	0.0075632
MLT1A	7995	19	1.05675	0.90794	0.567526	0.524232	0.00334026
L1MC4	17797	43	1.02405	0.938373	0.542577	0.519041	0.000947085
AmnHarb1	97	0	4.34311	1	0.796429	1	0
ARLTR2	15	0	26.9504	1	0.965851	1	0
BtERVF1_I-int	268	0	1.35269	1	0.479341	1	0
BTLTR1B1	852	2	1.20976	1	0.550019	0.708176	0
BTLTR1C1	36	0	9.93238	1	0.906809	1	0
BTLTR1D	38	0	10.2428	1	0.909369	1	0
BTLTR1E	123	0	3.23062	1	0.735923	1	0
BTLTR1E1	92	0	4.23042	1	0.791735	1	0
BTLTR1E2	66	0	6.09496	1	0.850938	1	0
BTLTR1E3	36	0	11.1098	1	0.916247	1	0
BTLTR1J1	48	0	8.45503	1	0.890729	1	0
BTLTR1J2	31	0	12.6255	1	0.92623	1	0
BTLTR1J3	41	0	9.88984	1	0.906119	1	0
BTLTR1J4	148	0	2.76014	1	0.698101	1	0
Chap1a_Mam	903	2	1.43335	1	0.652193	0.618407	0
Charlie11	106	0	3.84566	1	0.773159	1	0
Charlie12	3	0	110.329	1	0.993233	1	0
Charlie14a	320	0	1.33005	1	0.473095	1	0
Charlie1a	4591	11	1.06464	1	0.547348	0.572198	0
Charlie29a	609	1	1.36731	1	0.571448	0.768047	0
Charlie29b	1012	2	1.2686	1	0.579723	0.68357	0
Charlie31a	467	1	1.82614	1	0.701695	0.665204	0
Charlie6	215	0	1.84932	1	0.584222	1	0
Charlie7b_Mars	59	0	7.04117	1	0.869807	1	0
Chompy-6_Croc	143	0	3.05229	1	0.722566	1	0
CHR-2	14174	33	1.00245	1	0.483764	0.585461	0
CR1-11_Crp	36	0	11.7367	1	0.920533	1	0
CR1-12_AMi	102	0	4.13258	1	0.787154	1	0
CR1-13_AMi	69	0	6.13591	1	0.851758	1	0
CR1-16_AMi	250	0	1.69593	1	0.556269	1	0
CR1-1_Amn	43	0	9.77927	1	0.905006	1	0
CR1-3_Croc	711	1	1.2179	1	0.512489	0.80611	0
CR1-L3B_Croc	31	0	13.6876	1	0.931747	1	0
CR1_Mam	1062	2	1.2019	1	0.545678	0.711609	0
DNA1_Mam	135	0	3.14958	1	0.729956	1	0
ERV1-2C-LTR_BT	2667	6	1.08442	1	0.534224	0.624297	0
ERV2-2-I_BT	153	0	2.25941	1	0.644661	1	0
ERV2-2-LTR_BT	87	0	4.61767	1	0.807493	1	0
ERV2-3-LTR_BT	209	0	1.9015	1	0.592943	1	0
ERV3-16A3_LTR	844	1	1.00017	1	0.407228	0.864298	0
Eulor11	82	0	5.18168	1	0.826604	1	0
Eulor1	65	0	6.51408	1	0.859843	1	0
Eulor6A	24	0	17.2859	1	0.946039	1	0
Eulor6B	58	0	7.28009	1	0.873829	1	0
Eulor6C	18	0	22.9485	1	0.959604	1	0
Eulor6D	57	0	7.41816	1	0.87606	1	0
Eulor6E	24	0	17.2737	1	0.946002	1	0
Eulor9A	93	0	4.59441	1	0.806479	1	0
Eulor9B	27	0	15.5967	1	0.940114	1	0
Eulor9C	93	0	4.65771	1	0.808837	1	0
EuthAT-N1	48	0	8.75085	1	0.894216	1	0
EuthAT-N1a	38	0	11.0994	1	0.916053	1	0
Eutr11	440	1	1.91291	1	0.719913	0.648167	0
Eutr2	25	0	16.4496	1	0.943287	1	0
Eutr2B	41	0	10.1614	1	0.908507	1	0
EUTREP16	245	0	1.75821	1	0.567964	1	0
EUTREP8	166	0	2.58312	1	0.680914	1	0
EutTc1-N1	42	0	9.94455	1	0.906557	1	0
EutTc1-N2	123	0	3.43796	1	0.749641	1	0
FordPrefect	485	1	1.67084	1	0.664717	0.697546	0
FordPrefect_a	192	0	2.20194	1	0.636865	1	0
hAT-4b_Ther	155	0	2.72221	1	0.694528	1	0
hAT-N1a_Mam	322	0	1.32568	1	0.471921	1	0
hAT-N1_Mam	142	0	2.99226	1	0.717891	1	0
HERVL74-int	278	0	1.45996	1	0.505849	1	0
Kanga1d	494	1	1.73429	1	0.680534	0.684049	0
L1M3e	291	0	1.39978	1	0.491189	1	0
L1MB4	6725	16	1.04155	1	0.534503	0.565019	0
L1ME3Cz	9262	22	1.03685	1	0.541236	0.544119	0
L1ME5	1906	4	1.09367	1	0.519274	0.669455	0
L1P5	129	0	3.38238	1	0.74601	1	0
L2-1_Crp	25	0	16.5881	1	0.943747	1	0
LTR107_Mam	308	0	1.37755	1	0.485504	1	0
LTR108a_Mam	60	0	6.90313	1	0.867351	1	0
LTR108b_Mam	41	0	9.97778	1	0.906906	1	0
LTR108c_Mam	34	0	11.8802	1	0.921577	1	0
LTR108d_Mam	63	0	6.51675	1	0.859963	1	0
LTR108e_Mam	115	0	3.61755	1	0.760562	1	0
LTR109A1	169	0	2.45039	1	0.666869	1	0
LTR109A2	74	0	5.63965	1	0.839679	1	0
LTR109B	192	0	2.16826	1	0.632423	1	0
LTR10A_BT	1629	3	1.00526	1	0.438524	0.758458	0
LTR10_EC	399	0	1.03101	1	0.380586	1	0
LTR13_BT	924	2	1.37299	1	0.627462	0.641554	0
LTR16B1	897	2	1.39593	1	0.637107	0.63265	0
LTR16D2	207	0	2.03	1	0.612879	1	0
LTR16D	714	1	1.19158	1	0.501063	0.813001	0
LTR18C_BT	70	0	5.95	1	0.847473	1	0
LTR2B_BT	340	0	1.14128	1	0.417996	1	0
LTR2C_BT	181	0	2.12902	1	0.627224	1	0
LTR33A_	1245	2	1.01405	1	0.433566	0.794205	0
LTR33C	758	1	1.11632	1	0.466454	0.832975	0
LTR40b	1012	2	1.24534	1	0.568191	0.693242	0
LTR40c	435	1	1.91671	1	0.720683	0.647432	0
LTR45	11	0	35.8638	1	0.974793	1	0
LTR45B_BT	104	0	3.93917	1	0.777929	1	0
LTR45_BT	174	0	2.36841	1	0.657538	1	0
LTR45C	70	0	6.05699	1	0.849951	1	0
LTR46_BT	183	0	2.20119	1	0.636856	1	0
LTR52-int	156	0	2.60144	1	0.682875	1	0
LTR53	365	0	1.12752	1	0.413472	1	0
LTR53B	148	0	2.75832	1	0.697935	1	0
LTR53-int	319	0	1.23933	1	0.447915	1	0
LTR58	3	0	109.721	1	0.993196	1	0
LTR65	341	0	1.2263	1	0.44401	1	0
LTR69	1	0	218.202	1	0.997714	1	0
LTR6B_BT	364	0	1.15186	1	0.421252	1	0
LTR71_BT	141	0	2.99666	1	0.718254	1	0
LTR73	1	0	219.002	1	0.997722	1	0
LTR75_1	43	0	9.85199	1	0.905672	1	0
LTR75B	150	0	2.72324	1	0.694687	1	0
LTR77	21	0	19.8421	1	0.953085	1	0
LTR7_BT	141	0	2.81302	1	0.702924	1	0
LTR80A	320	0	1.29989	1	0.464962	1	0
LTR80B	342	0	1.22491	1	0.4436	1	0
LTR81AB	153	0	2.78553	1	0.700323	1	0
LTR81C	395	0	1.07259	1	0.395104	1	0
LTR82A	928	2	1.3543	1	0.619398	0.648891	0
LTR83	527	1	1.6026	1	0.646348	0.712574	0
LTR86A1	328	0	1.28484	1	0.460776	1	0
LTR86B1	214	0	1.97893	1	0.605134	1	0
LTR86B2	174	0	2.42127	1	0.663576	1	0
LTR8_BT	373	0	1.11221	1	0.408449	1	0
LTR90B	316	0	1.35996	1	0.480954	1	0
MamGypLTR1a	665	1	1.28129	1	0.538718	0.789718	0
MamGypLTR2b	512	1	1.67855	1	0.666648	0.695906	0
MamGypLTR4	432	1	1.97309	1	0.731611	0.636785	0
MamRep1879	811	1	1.06747	1	0.4424	0.846109	0
MamRep1894	297	0	1.46676	1	0.507342	1	0
MamRep38	1240	2	1.04039	1	0.450742	0.782434	0
MamRTE2	38	0	11.0629	1	0.915788	1	0
MARE10	58	0	7.30055	1	0.874159	1	0
MARE6	113	0	3.67914	1	0.764086	1	0
MARE8	138	0	3.12701	1	0.728259	1	0
MER110-int	346	0	1.18289	1	0.430975	1	0
MER121B	55	0	7.665	1	0.879871	1	0
MER126	199	0	2.15252	1	0.630244	1	0
MER127	157	0	2.71282	1	0.693628	1	0
MER132	36	0	11.7651	1	0.920717	1	0
MER133A	38	0	11.2636	1	0.917223	1	0
MER133B	27	0	15.6503	1	0.940312	1	0
MER134	69	0	6.19123	1	0.852979	1	0
MER136	26	0	15.8368	1	0.941074	1	0
MER31A	567	1	1.47051	1	0.606732	0.74301	0
MER31B	1176	2	1.0673	1	0.467842	0.770422	0
MER31_BT	321	0	1.28189	1	0.459991	1	0
MER31-int	2054	4	1.00914	1	0.449368	0.728231	0
MER45B	1060	2	1.1657	1	0.525993	0.727159	0
MER4B-int	350	0	1.20543	1	0.437784	1	0
MER52-int	323	0	1.2407	1	0.448292	1	0
MER63D	1914	4	1.12614	1	0.544193	0.647318	0
MER67A	351	0	1.19463	1	0.434529	1	0
MER67B	369	0	1.12658	1	0.413152	1	0
MER68B	372	0	1.11454	1	0.409218	1	0
MER68C	117	0	3.57456	1	0.75803	1	0
MER68-int	194	0	2.10034	1	0.623115	1	0
MER70C	291	0	1.42603	1	0.49765	1	0
MER74C	208	0	2.00378	1	0.608961	1	0
MER76-int	147	0	2.74635	1	0.696857	1	0
MER83A-int	20	0	20.4254	1	0.954496	1	0
MER83B-int	44	0	9.71012	1	0.904314	1	0
MER87A2_BT	151	0	2.73378	1	0.695649	1	0
MER87_BT	1874	4	1.11126	1	0.532915	0.657421	0
MER88	144	0	2.8863	1	0.709193	1	0
MER89-int	405	0	1.00444	1	0.37098	1	0
MER90	520	1	1.60102	1	0.645921	0.712921	0
MER92A	177	0	2.37897	1	0.658729	1	0
MER92C	126	0	3.27546	1	0.738965	1	0
MER92D	182	0	2.3213	1	0.65189	1	0
MER94B	344	0	1.26842	1	0.456116	1	0
MER95	19	0	21.2934	1	0.956416	1	0
MER97a	197	0	2.06618	1	0.618238	1	0
MER97b	196	0	2.11536	1	0.625189	1	0
MER97c	185	0	2.21018	1	0.638004	1	0
MER97d	94	0	4.34428	1	0.796544	1	0
MER99	182	0	2.28311	1	0.647248	1	0
MERX	247	0	1.71393	1	0.559723	1	0
MLT1A0-int	325	0	1.25227	1	0.451612	1	0
MLT1A-int	315	0	1.29897	1	0.464733	1	0
MLT1C2-int	324	0	1.25948	1	0.453673	1	0
MLT1C-int	97	0	4.19335	1	0.78999	1	0
MLT1E1A-int	72	0	5.58522	1	0.838311	1	0
MLT1E1-int	25	0	16.0457	1	0.941904	1	0
MLT1E2	3319	8	1.12503	1	0.59291	0.547193	0
MLT1E2-int	106	0	3.82117	1	0.771887	1	0
MLT1E3-int	46	0	8.69984	1	0.893724	1	0
MLT1E	799	1	1.04874	1	0.432881	0.851153	0
MLT1E-int	20	0	19.3071	1	0.951927	1	0
MLT1F1-int	164	0	2.46657	1	0.6687	1	0
MLT1F2-int	181	0	2.22869	1	0.640428	1	0
MLT1G1-int	273	0	1.4848	1	0.511672	1	0
MLT1G3-int	201	0	2.01539	1	0.610764	1	0
MLT1G-int	148	0	2.76512	1	0.698552	1	0
MLT1H1-int	223	0	1.82474	1	0.579946	1	0
MLT1H2-int	247	0	1.64835	1	0.546965	1	0
MLT1J1-int	337	0	1.22319	1	0.443115	1	0
MLT1J2-int	367	0	1.1178	1	0.410305	1	0
MLT1K-int	84	0	5.00852	1	0.821135	1	0
MLT1L-int	54	0	7.6169	1	0.879201	1	0
MLT1M-int	1	0	217.691	1	0.997708	1	0
MLT1N2-int	24	0	17.0069	1	0.945179	1	0
MLT1O-int	4	0	84.9858	1	0.990642	1	0
MLT2B3	127	0	3.2481	1	0.73707	1	0
MLT2B4	3197	7	1.05164	1	0.509661	0.636205	0
MLT2C2	1091	2	1.16358	1	0.524787	0.728089	0
MLT2E	338	0	1.25742	1	0.453023	1	0
MLT-int	197	0	2.1393	1	0.62847	1	0
Oamar1	26	0	15.251	1	0.938884	1	0
OldhAT-N1b	10	0	39.4687	1	0.977256	1	0
OldhAT-N1c	1	0	219.923	1	0.997732	1	0
ORSL	937	2	1.38009	1	0.630463	0.638792	0
Tigger11a	275	0	1.52841	1	0.521523	1	0
Tigger16b	893	2	1.45961	1	0.66235	0.608605	0
Tigger17	71	0	5.74096	1	0.842357	1	0
Tigger17b	68	0	5.93268	1	0.847127	1	0
Tigger17c	311	0	1.34584	1	0.477304	1	0
Tigger20a	863	2	1.47522	1	0.668238	0.602849	0
Tigger23a	370	0	1.15666	1	0.422742	1	0
Tigger2a	6	0	62.1808	1	0.986326	1	0
Tigger2a_Car	87	0	4.95828	1	0.819426	1	0
Tigger6	224	0	1.87535	1	0.588517	1	0
Tigger6a	475	1	1.65871	1	0.661585	0.700166	0
Tigger8	645	1	1.31479	1	0.551838	0.781199	0
UCON11	47	0	8.88712	1	0.895793	1	0
UCON15	40	0	10.5157	1	0.911498	1	0
UCON29	183	0	2.32674	1	0.652532	1	0
UCON33	98	0	4.30532	1	0.79482	1	0
UCON35	120	0	3.60909	1	0.759989	1	0
UCON37	124	0	3.4525	1	0.750534	1	0
UCON39	75	0	5.70871	1	0.841425	1	0
UCON4	141	0	3.04491	1	0.722025	1	0
UCON44	227	0	1.87602	1	0.588605	1	0
UCON58	123	0	3.47298	1	0.751819	1	0
UCON59	45	0	9.46007	1	0.901868	1	0
UCON78	153	0	2.7952	1	0.701186	1	0
UCON80	32	0	13.1174	1	0.928822	1	0
UCON81	31	0	13.7734	1	0.932157	1	0
UCON8	160	0	2.66365	1	0.68893	1	0
UCON86	91	0	4.70295	1	0.810531	1	0
X13_LINE	103	0	4.11281	1	0.78623	1	0
X15_LINE	181	0	2.40213	1	0.661342	1	0
X17_LINE	766	1	1.13431	1	0.474965	0.828178	0
X1_DNA	471	1	1.80366	1	0.696708	0.669735	0
X1_LINE	64	0	6.43935	1	0.858373	1	0
X1_LR	14	0	28.9797	1	0.968343	1	0
X20_LINE	121	0	3.51096	1	0.754173	1	0
X23_DNA	58	0	7.27477	1	0.873743	1	0
X24_DNA	331	0	1.31513	1	0.46905	1	0
X26_DNA	587	1	1.45116	1	0.600405	0.747629	0
X2a_DNA	264	0	1.64458	1	0.546099	1	0
X2b_DNA	105	0	4.12502	1	0.786751	1	0
X2_LINE	150	0	2.82589	1	0.703929	1	0
X30_DNA	461	1	1.87198	1	0.711505	0.65612	0
X32_DNA	235	0	1.81742	1	0.578586	1	0
X33a_DNA	76	0	5.49036	1	0.835646	1	0
X34_DNA	67	0	6.39026	1	0.85727	1	0
X4a_DNA	121	0	3.53218	1	0.755451	1	0
X4b_DNA	424	0	1.01023	1	0.373031	1	0
X5B_LINE	55	0	7.86339	1	0.882714	1	0
X6b_DNA	527	1	1.64246	1	0.657197	0.703757	0
X7C_LINE	398	0	1.08871	1	0.400554	1	0
X7D_LINE	25	0	16.9137	1	0.944798	1	0
X9a_DNA	443	1	1.93953	1	0.725162	0.643097	0
X9b_DNA	403	0	1.05845	1	0.390211	1	0
X9_LINE	538	1	1.62475	1	0.652415	0.707663	0
Zaphod3	1074	2	1.18981	1	0.53919	0.716784	0
Zaphod5a	54	0	7.72429	1	0.880775	1	0
Zaphod5b	45	0	9.37466	1	0.90102	1	0
L1ME3G	11085	25	0.987393	0.921426	0.449346	0.628244	-0.000650511
MER58A	10045	22	0.981672	0.91672	0.438212	0.643549	-0.00100781
HERVL40-int	827	1	0.993723	0.728837	0.403752	0.866036	-0.00124783
MER115	1704	3	0.98857	0.804198	0.425438	0.76824	-0.0015695
CHR-2A	30203	69	0.978888	0.855606	0.416164	0.630879	-0.00208494
Charlie4	870	1	0.983564	0.728901	0.39815	0.8688	-0.00328357
Charlie15b	1327	2	0.964896	0.775879	0.400202	0.816215	-0.00568169
LTR9A_EC	422	0	0.97835	0.631621	0.361258	1	-0.00630097
LTR82B	869	1	0.967374	0.729099	0.389188	0.873177	-0.00656633
L1MEh	1756	3	0.943233	0.80544	0.388918	0.794703	-0.00792275
L1M4a2	2129	4	0.9346	0.825995	0.382426	0.780275	-0.00810121
Charlie17	432	0	0.970799	0.63169	0.358382	1	-0.00852964
LFSINE_Vert	1892	3	0.918839	0.806923	0.368648	0.808852	-0.0113773
LTR78B	1875	3	0.908493	0.807725	0.359971	0.814803	-0.0128396
LTR91A	1389	2	0.921118	0.777707	0.36919	0.835715	-0.012943
CHR-2B	34444	77	0.952544	0.649082	0.324232	0.716232	-0.0131657
MamGyp-int	436	0	0.954858	0.631897	0.352292	1	-0.0132854
Charlie13a	436	0	0.95008	0.631979	0.350452	1	-0.0147239
MER58D	935	1	0.927378	0.730328	0.366371	0.883985	-0.0148452
Tigger12A	454	0	0.947598	0.632045	0.349441	1	-0.0154724
MLT1D-int	424	0	0.946443	0.632033	0.349081	1	-0.0158238
L1M3b	422	0	0.942728	0.632107	0.347645	1	-0.0169499
LTR18B_BT	435	0	0.942145	0.632136	0.347378	1	-0.017126
L1MC1	14321	32	0.932101	0.669596	0.323073	0.737239	-0.0176697
X6A_LINE	950	1	0.91322	0.731025	0.358099	0.887793	-0.0178202
LTR106_Mam	447	0	0.938925	0.632222	0.346088	1	-0.0181044
MER21C	7201	15	0.915849	0.716382	0.331685	0.754293	-0.0183703
LTR41	921	1	0.907154	0.731354	0.354558	0.88941	-0.0191011
L1ME3F	2716	5	0.90739	0.695654	0.354008	0.788151	-0.0220973
MER67D	940	1	0.892512	0.732304	0.345843	0.893333	-0.0221983
MLT2B2	962	1	0.868353	0.734252	0.331238	0.899766	-0.0273201
Charlie24	982	1	0.863598	0.734702	0.328314	0.901031	-0.0283266
LTR84a	470	0	0.901622	0.633459	0.331185	1	-0.0296243
hAT-1_Mam	988	1	0.851453	0.735923	0.320839	0.904238	-0.030895
ERV1-1B-LTR_BT	4192	8	0.89591	0.634625	0.328953	0.783253	-0.0313156
ALTR39_BT	2349	4	0.87307	0.672139	0.324379	0.822245	-0.0337888
Charlie10	1009	1	0.830071	0.738415	0.307501	0.909848	-0.0353867
L1MA10	3802	7	0.888015	0.616491	0.324069	0.793448	-0.0359949
MER113	2460	4	0.862395	0.673206	0.314131	0.829356	-0.0367039
MER106A	489	0	0.87234	0.634953	0.319096	1	-0.0388671
Charlie21a	477	0	0.871017	0.635017	0.318573	1	-0.0392907
BtERVF2_I-int	424	0	0.864771	0.635323	0.316106	1	-0.0412941
MamGypsy2-LTR	512	0	0.847345	0.636647	0.308487	1	-0.0468639
L5	503	0	0.844212	0.636873	0.307165	1	-0.0478744
MER110A	500	0	0.842887	0.636972	0.306604	1	-0.0483017
MER21-int	490	0	0.839119	0.637256	0.305006	1	-0.0495188
L1M3c	1913	3	0.836052	0.641757	0.297729	0.855531	-0.0497628
Tigger12c	518	0	0.827292	0.638291	0.299817	1	-0.0533336
L1PB4	500	0	0.818886	0.639037	0.296178	1	-0.0560601
MLT1C2	13169	27	0.887844	0.47106	0.243366	0.811863	-0.0561072
Charlie1	1469	2	0.83891	0.595043	0.308097	0.87156	-0.0571319
LTR33	6346	12	0.866514	0.516256	0.269036	0.814497	-0.0593524
MER135	539	0	0.808008	0.640164	0.29129	1	-0.0595768
MLT1D	15092	31	0.881914	0.447842	0.21967	0.828981	-0.0632474
MER110	530	0	0.795644	0.641487	0.285787	1	-0.0635903
Zaphod2	542	0	0.778829	0.643519	0.27815	1	-0.0690368
MLT1J2	4591	8	0.835164	0.537433	0.253853	0.841045	-0.0700802
Arthur1C	557	0	0.772531	0.644357	0.275239	1	-0.071069
Charlie18a	1607	2	0.800549	0.59837	0.278552	0.887705	-0.0715789
L1MC5	11002	22	0.868164	0.432519	0.225233	0.832187	-0.0742403
MamGypLTR2c	560	0	0.761966	0.645812	0.270361	1	-0.0744767
L1M3a	545	0	0.755179	0.646778	0.267235	1	-0.0766647
LTR16B	558	0	0.749654	0.647631	0.264628	1	-0.0784318
L1MEg2	558	0	0.745268	0.648315	0.262569	1	-0.0798345
LTR4_BT	559	0	0.743317	0.648627	0.261649	1	-0.0804568
L1ME2z	5477	10	0.83261	0.486774	0.235554	0.846835	-0.0826354
MER45R	573	0	0.734829	0.650041	0.257609	1	-0.0831513
BTLTR1D2	538	0	0.734593	0.650031	0.257563	1	-0.0832413
LTR41C	576	0	0.73441	0.650116	0.257404	1	-0.0832832
X7A_LINE	599	0	0.722951	0.652153	0.251896	1	-0.0868902
MER76	571	0	0.722381	0.652218	0.251671	1	-0.087081
Kanga1a	586	0	0.718513	0.65295	0.249786	1	-0.0882862
L1ME3B	5002	9	0.823979	0.4687	0.232214	0.852882	-0.0919255
L1MEc	13196	27	0.852387	0.375418	0.179136	0.86578	-0.0980398
MER77	1065	1	0.77794	0.529763	0.274149	0.923261	-0.0999566
MLT1A0	11455	22	0.843979	0.382044	0.185157	0.86501	-0.102265
MER77B	1073	1	0.770122	0.530304	0.269056	0.925233	-0.103811
HAL1	14502	29	0.84885	0.346877	0.166074	0.875193	-0.108711
MER46C	2202	3	0.773056	0.503707	0.242506	0.888855	-0.110598
L1ME4c	6269	11	0.808929	0.430056	0.197669	0.872301	-0.11211
Charlie4a	2176	3	0.769506	0.504175	0.239411	0.890646	-0.112423
L1MD3	4727	8	0.793356	0.451767	0.204311	0.876917	-0.115245
L4_A_Mam	4208	7	0.801385	0.426524	0.223151	0.868078	-0.118208
MER57LA	1149	1	0.738356	0.533795	0.248129	0.933126	-0.119304
L1MEb	1111	1	0.737895	0.533837	0.247851	0.933231	-0.119534
Kanga2_a	1176	1	0.713497	0.538071	0.231587	0.939133	-0.131087
HAL1b	2713	4	0.769824	0.430482	0.225396	0.88731	-0.138145
L1MB8	12388	24	0.823318	0.310568	0.145047	0.895403	-0.142439
L1MD	8674	16	0.806614	0.321469	0.161158	0.890571	-0.152811
BLACKJACK	1711	2	0.720227	0.454651	0.21592	0.919466	-0.162082
LTR16E1	1786	2	0.710294	0.456374	0.208167	0.923162	-0.168129
Tigger19a	2337	3	0.738678	0.390282	0.212588	0.905818	-0.17856
ERV3-16A3_I-int	4261	7	0.759214	0.351036	0.177064	0.89956	-0.180688
MLT1G3	2427	3	0.687386	0.397632	0.169146	0.929063	-0.216603
LTR31B_BT	615	0	0.671768	0.413039	0.226792	1	-0.220408
MER34-int	622	0	0.669987	0.413136	0.22589	1	-0.22182
ERVL-int	622	0	0.659925	0.413741	0.220833	1	-0.22982
ERV2-1B-LTR_BT	524	0	0.656178	0.413871	0.219115	1	-0.232885
MamRep434	1261	1	0.678863	0.382022	0.208332	0.94723	-0.233533
BtERV3B_LTR	1242	1	0.672151	0.382327	0.203833	0.948752	-0.239325
LTR81B	657	0	0.644796	0.41504	0.213107	1	-0.241782
MLT1H-int	643	0	0.642767	0.415225	0.212091	1	-0.243395
hAT-5_Mam	665	0	0.638116	0.415745	0.209681	1	-0.247042
MLT1C	5702	9	0.734342	0.272371	0.130257	0.924527	-0.251622
MER106B	679	0	0.63101	0.416602	0.206012	1	-0.252606
Kanga1	675	0	0.625282	0.417353	0.203063	1	-0.257079
L1MEg1	665	0	0.621204	0.417921	0.200965	1	-0.260255
LTR41B	677	0	0.618596	0.418328	0.199597	1	-0.262263
LTR39B_BT	1820	2	0.674019	0.340497	0.180194	0.936077	-0.266292
LTR84b	692	0	0.609203	0.419886	0.194688	1	-0.269463
MER74B	700	0	0.595038	0.422621	0.187254	1	-0.280142
MLT2C1	1924	2	0.658925	0.341971	0.168699	0.941183	-0.280452
LTR75_BT	706	0	0.5871	0.424381	0.18306	1	-0.286003
L1M3d	709	0	0.568774	0.429095	0.173328	1	-0.299128
LTR50	2007	2	0.632035	0.347624	0.148628	0.949824	-0.30375
Arthur2	753	0	0.556378	0.432913	0.166656	1	-0.307555
L1MC5a	13194	23	0.755473	0.148635	0.0680213	0.954464	-0.334916
ERVL-E-int	5269	8	0.699084	0.205843	0.107	0.941646	-0.354532
Bov-tA1	216595	459	0.872041	0.0115862	0.00599614	0.994872	-0.382434
LTR39_BT	2013	2	0.620738	0.254623	0.140379	0.95327	-0.408709
L1MC2	4818	7	0.675716	0.187225	0.0979863	0.949327	-0.411486
ALTR2B1_BT	4908	7	0.673827	0.187347	0.0964349	0.950243	-0.414264
MLT2D	3287	4	0.640983	0.207989	0.112652	0.951137	-0.437574
LTR32_BT	1446	1	0.57991	0.275784	0.142266	0.968037	-0.439769
L2	44415	85	0.803165	0.0386287	0.0190508	0.985426	-0.446863
MLT2F	1455	1	0.571395	0.27687	0.136725	0.969633	-0.450329
Tigger1	5335	8	0.666275	0.167836	0.079919	0.958092	-0.454071
LTR37B	1492	1	0.567063	0.27759	0.133908	0.970434	-0.455529
Tigger2a_Art	6323	9	0.678981	0.148875	0.0804347	0.956266	-0.462025
Tigger2f	1514	1	0.539603	0.284639	0.116421	0.975275	-0.485694
MER121	782	0	0.54447	0.27314	0.160234	1	-0.494332
MER96	823	0	0.527865	0.273762	0.151246	1	-0.518607
LTR52	809	0	0.518088	0.274534	0.14597	1	-0.532621
Charlie25	814	0	0.501502	0.276696	0.136981	1	-0.555583
MER45C	869	0	0.482406	0.280695	0.126593	1	-0.580281
Tigger2	908	0	0.471021	0.283925	0.12041	1	-0.593896
MLT1J1	3597	4	0.592953	0.162311	0.0782891	0.968117	-0.595405
MER94	3024	3	0.575866	0.177545	0.0854454	0.968856	-0.597696
L1MEf	7902	12	0.655097	0.087621	0.0429866	0.976302	-0.64524
LTR40a	1580	1	0.524731	0.197181	0.107177	0.977736	-0.656022
L1MB1	5913	8	0.621693	0.109239	0.0499327	0.975284	-0.659408
Charlie2a	1639	1	0.505611	0.199514	0.0956122	0.980716	-0.688756
L1MEd	10517	16	0.660707	0.0571851	0.0289461	0.983342	-0.743043
ERV1-1-LTR_BT	2348	2	0.522845	0.140476	0.0754663	0.978096	-0.797457
LTR91	949	0	0.448748	0.182473	0.108398	1	-0.854071
L1ME2	9120	13	0.62333	0.0532668	0.0233244	0.987549	-0.868469
L1M4c	4692	6	0.574006	0.0819202	0.0418793	0.981676	-0.870225
EuthAT-2	949	0	0.437969	0.182798	0.10264	1	-0.879065
MER34A	5230	6	0.56884	0.0824755	0.0393434	0.982917	-0.88201
L1MDb	948	0	0.426531	0.183825	0.0965738	1	-0.904251
Tigger18a	979	0	0.425474	0.183981	0.0959996	1	-0.906429
Tigger10	1003	0	0.422715	0.184379	0.0945333	1	-0.912163
LTR33B	1015	0	0.418881	0.184998	0.0925123	1	-0.919991
LTR39C2_BT	1004	0	0.414557	0.185792	0.0902532	1	-0.928597
MER102c	1830	1	0.468652	0.141338	0.074456	0.985872	-0.929118
L4_C_Mam	3249	3	0.522075	0.100682	0.0538211	0.981903	-0.934904
LTR104_Mam	1045	0	0.408889	0.187069	0.0872811	1	-0.939277
MLT1E1	1034	0	0.405837	0.187826	0.0857028	1	-0.944864
Zaphod	1823	1	0.456273	0.143086	0.0678094	0.98741	-0.955889
Charlie2b	2619	2	0.478498	0.104359	0.0515539	0.986089	-1.04371
L1MC3	10455	15	0.615722	0.0284253	0.0149647	0.991961	-1.08186
MER90a	1089	0	0.382208	0.12257	0.0736272	1	-1.26493
L1ME3A	11053	15	0.593893	0.0186855	0.00961709	0.994996	-1.29935
L1M8	1100	0	0.370642	0.122998	0.0678785	1	-1.30318
LTR78	2866	2	0.439143	0.0782659	0.0340998	0.991437	-1.31359
Tigger16a	1175	0	0.36472	0.123635	0.0649589	1	-1.32106
MLT1J-int	1233	0	0.338888	0.129939	0.0527476	1	-1.38356
L4_B_Mam	2122	1	0.399256	0.0714648	0.0405611	0.993254	-1.51788
L1M4a1	2024	1	0.395024	0.0716089	0.0388061	0.993603	-1.53433
Mariner1_BT	8287	9	0.52116	0.0151167	0.00830587	0.996402	-1.71168
LTR16C	4655	4	0.451821	0.0319993	0.0147871	0.995216	-1.71337
MER34B-int	1326	0	0.313764	0.0841835	0.0416786	1	-1.79729
L1M6	3063	2	0.408454	0.0405689	0.0231804	0.994526	-1.79787
ERV1-1C-LTR_BT	2945	2	0.408129	0.0405606	0.023084	0.994553	-1.79959
MER104	1415	0	0.304712	0.0862377	0.0379166	1	-1.82473
LTR16A2	1402	0	0.299894	0.0877092	0.0359813	1	-1.83643
LTR16A	3149	2	0.39919	0.040986	0.0203579	0.995286	-1.83806
HERV16-int	1381	0	0.296874	0.0887798	0.0347905	1	-1.84264
L1MEi	3195	2	0.387709	0.0426706	0.0171668	0.996124	-1.87255
L1MD1	4565	4	0.436539	0.0239448	0.0113871	0.996425	-1.93817
LTR67B	2506	1	0.340491	0.0360809	0.0196095	0.997149	-2.24244
L1ME3D	2424	1	0.338386	0.0361856	0.0190145	0.99725	-2.25338
L1ME3E	2474	1	0.331927	0.0368138	0.0172391	0.997547	-2.28157
L1MEj	1505	0	0.274044	0.0580258	0.0263016	1	-2.30896
ERV1-2-I_BT	3170	2	0.354687	0.0220724	0.00981111	0.99795	-2.47658
MLT1B	14952	18	0.529711	0.00159229	0.000857926	0.99959	-2.56497
MLT1H1	2668	1	0.312389	0.0259609	0.0124803	0.998315	-2.6617
ERVL-B4-int	2641	1	0.30457	0.0270419	0.010835	0.998569	-2.6893
L1MD2	8184	8	0.44356	0.00333496	0.00184529	0.999321	-2.90492
MLT1E1A	2783	1	0.299358	0.01806	0.00981298	0.998723	-3.0334
L1MC4a	7814	7	0.420021	0.00342168	0.00155459	0.999468	-3.08582
MLT2B1	2876	1	0.288012	0.0190271	0.00781074	0.999017	-3.0899
L1_Art	61925	95	0.645669	7.76788e-06	4.06229e-06	0.999997	-3.2249
L1MCb	1695	0	0.236848	0.0257564	0.0148626	1	-3.30213
HAL1M8	1729	0	0.236456	0.0257722	0.0147574	1	-3.30537
L1M7	1831	0	0.225017	0.0269487	0.0119118	1	-3.37732
Bov-tA2	537541	1146	0.725095	1.00206e-08	5.46988e-09	1	-3.70965
MER87B_BT	3244	1	0.255481	0.00631336	0.00360157	0.999592	-4.33065
ERV1-3-I_BT	3480	1	0.236866	0.0045951	0.00208968	0.999779	-4.85741
L1MC	8201	6	0.350499	0.000586152	0.000280777	0.999921	-4.88845
HAL1ME	4723	2	0.266905	0.00220065	0.00102907	0.999833	-5.06403
L1MCc	2220	0	0.184272	0.00816376	0.0044777	1	-5.09518
L1ME1	20665	23	0.461856	1.25767e-05	7.0428e-06	0.999997	-5.46145
L1M2	9462	7	0.339215	0.000143408	7.10602e-05	0.99998	-5.9947
L1M4	19274	20	0.434659	8.37406e-06	4.50625e-06	0.999998	-6.10286
L1-2_BT	111037	178	0.628794	4.8304e-10	2.37204e-10	1	-6.2356
ERV1-1-I_BT	2389	0	0.154859	0.00412254	0.00160719	1	-6.41753
L1MA9	46448	59	0.512771	1.23636e-08	6.73422e-09	1	-7.62012
L1MDa	5337	2	0.221436	0.000284285	0.000146982	0.99998	-7.71322
L1MCa	6970	3	0.226987	5.21373e-05	2.62469e-05	0.999996	-9.16239
L1M3de	3240	0	0.121049	0.000588625	0.000267314	1	-9.84016
L1M5	35493	37	0.434234	3.57415e-09	2.00045e-09	1	-10.1654
LTR1_BT	3520	0	0.115911	0.000400815	0.000185686	1	-10.5612
L1M4b	3445	0	0.115482	0.000405408	0.000179923	1	-10.5639
L1M3	16123	12	0.319605	3.23239e-07	1.71811e-07	1	-10.681
L1-3_BT	58431	72	0.453691	5.98537e-14	3.32546e-14	1	-15.077
ERV2-1-LTR_BT	8097	1	0.100164	8.80017e-08	5.11122e-08	1	-23.4212
L1MEg	8935	1	0.0901238	1.49682e-08	6.29974e-09	1	-27.1674
BTLTR1J	22110	9	0.194384	1.29684e-12	6.89774e-13	1	-28.0895
Bov-tA3	345315	449	0.405061	3.94453e-66	2.62815e-66	1	-85.2731
Bov-A2	362131	470	0.375265	3.09324e-79	2.0351e-79	1	-111.014
L1_BT	88749	54	0.200138	3.11558e-53	1.62228e-53	1	-121.864
BTLTR1	82729	30	0.147612	2.91418e-50	1.73497e-50	1	-136.724
BovB	562047	657	0.0800259	6.64913e-201	6.64913e-201	1	-729.324

## Sheet: Nonresponsive H3K27ac
TE family	TE family size	Number of overlaps	Odds ratio	Fisher's two tail	Fisher's left tail	Fisher's right tail	Combo score
MIRb	166108	1045	1.70466	8.79373e-45	1	4.87e-45	33.9004
MIR3	62466	441	1.81701	1.30497e-27	1	9.39087e-28	23.1628
MIR	133102	803	1.56829	3.57551e-27	1	2.03135e-27	17.1691
MIRc	76415	497	1.66606	3.69148e-23	1	2.1475e-23	16.5205
Charlie13a	436	10	5.87445	2.91737e-05	0.999995	2.91737e-05	11.5845
MER133B	27	2	28.2101	0.00544698	0.999816	0.00544698	10.9075
MER87A2_BT	151	5	9.30369	0.000575404	0.99994	0.000575404	10.4258
EuthAT-N1a	38	2	19.4999	0.0109263	0.999462	0.0109263	8.40592
OldhAT-N1b	10	1	48.277	0.0405091	0.999251	0.0405091	7.78832
Tigger6	224	5	6.34473	0.00298644	0.999543	0.00298644	6.73012
L2b	65106	389	1.47265	8.32173e-12	1	5.18172e-12	6.18714
UCON37	124	3	7.85571	0.0153537	0.998114	0.0153537	5.39374
Tigger17	71	2	9.69276	0.0394423	0.996097	0.0394423	4.6009
MamGypsy2-LTR	512	7	3.83021	0.00583723	0.998532	0.00583723	4.3278
LTR81	229	4	5.22138	0.0167694	0.996915	0.0167694	4.23352
MLT1-int	224	4	5.18182	0.0171941	0.996814	0.0171941	4.18825
Charlie16	971	11	2.91201	0.00364708	0.998792	0.00364708	3.75951
MER113	2460	23	2.31085	0.000836604	0.999781	0.000520477	3.7189
AmnSINE1	1905	18	2.44655	0.00159858	0.999521	0.0012082	3.60927
AmnHarb1	97	2	7.34791	0.0641623	0.991666	0.0641623	3.43185
LTR6B_BT	364	5	3.85917	0.0215888	0.99466	0.0215888	3.24541
MER99	182	3	5.09962	0.0456185	0.991482	0.0456185	3.15154
SINE2-2_BT	46989	262	1.38768	1.23582e-06	0.999999	7.93483e-07	2.79258
MER77B	1073	11	2.55768	0.00912628	0.996582	0.00912628	2.76346
MER34-int	622	7	2.98062	0.0203188	0.99351	0.0203188	2.6661
Tigger6a	475	6	3.16423	0.0258799	0.992229	0.0258799	2.63743
L2d2	31234	182	1.4343	8.84202e-06	0.999996	5.378e-06	2.62954
MER102c	1830	16	2.23395	0.00588295	0.997666	0.00542134	2.58637
Tigger8	645	7	2.9317	0.0219609	0.992875	0.0219609	2.57332
L2c	78346	422	1.31445	3.84381e-07	1	2.2735e-07	2.53052
EuthAT-N1	48	1	9.89177	0.18275	0.982531	0.18275	2.44047
hAT-5_Mam	665	7	2.85376	0.0249011	0.991714	0.0249011	2.4263
MER31_BT	321	4	3.55204	0.0550653	0.985372	0.0550653	2.30249
DNA1_Mam	135	2	5.3093	0.110881	0.980296	0.110881	2.30048
MARE8	138	2	5.2959	0.111334	0.980165	0.111334	2.29274
Chap1_Mam	231	3	4.11696	0.0756068	0.982687	0.0756068	2.28951
Penelope1_Vert	975	9	2.52799	0.0203984	0.992327	0.0203984	2.26174
Charlie9	827	8	2.63252	0.0240865	0.991314	0.0240865	2.25976
MamSINE1	3612	27	1.8889	0.00384323	0.998485	0.00296014	2.21615
MER91A	2243	18	2.06429	0.00776172	0.996832	0.00680641	2.20635
LTR33A	1606	14	2.19478	0.0118895	0.995259	0.0108759	2.1829
MIR1_Amn	9606	62	1.61437	0.000695848	0.999719	0.000463583	2.18173
EUTREP16	245	3	3.95613	0.0828061	0.98031	0.0828061	2.14666
Charlie17a	592	6	2.86543	0.0387422	0.987227	0.0387422	2.1442
MER5A	27050	155	1.41463	7.68069e-05	0.999968	4.65361e-05	2.05904
Charlie5	2341	19	2.01613	0.00959789	0.99674	0.00683959	2.04121
LTR90A	252	3	3.80679	0.0903311	0.977731	0.0903311	2.01374
LTR81AB	153	2	4.68984	0.135453	0.972917	0.135453	1.93571
Tigger16b	893	8	2.45293	0.0342476	0.986809	0.0342476	1.89693
SINE2-1_BT	34074	188	1.36943	7.08472e-05	0.999967	4.53841e-05	1.88221
X17_LINE	766	7	2.54659	0.0416059	0.984601	0.0416059	1.86216
MamRep488	268	3	3.62409	0.100793	0.973979	0.100793	1.85125
MER67B	369	4	3.12662	0.0792164	0.976289	0.0792164	1.81101
MER112	2787	21	1.9014	0.0112026	0.99584	0.00823649	1.8084
MER63D	1914	15	2.01307	0.0197309	0.992073	0.0167373	1.72087
hAT-1_Mam	988	9	2.36591	0.0434506	0.988269	0.0293225	1.69215
X6b_DNA	527	5	2.7593	0.0702781	0.976171	0.0702781	1.68861
CR1-13_AMi	69	1	6.89687	0.25132	0.965844	0.25132	1.67093
X9_LINE	538	5	2.73836	0.0720501	0.975397	0.0720501	1.66021
LTR45C	70	1	6.80964	0.254091	0.96504	0.254091	1.64674
CHRL1_BT	18852	109	1.4238	0.000702556	0.999688	0.000452379	1.60739
MamRep1879	811	7	2.39257	0.0544227	0.978663	0.0544227	1.5911
L2a	117287	600	1.22979	6.69315e-06	0.999997	3.6251e-06	1.5441
MLT1F1	2761	21	1.84397	0.0187282	0.994153	0.0112509	1.52507
L2d	16765	98	1.42866	0.00130397	0.999473	0.000767985	1.48467
LTR45_BT	174	2	3.93635	0.177927	0.958079	0.177927	1.48217
MLT1E1A-int	72	1	6.16817	0.276451	0.958217	0.276451	1.46566
Charlie19a	1086	9	2.20944	0.0524556	0.982111	0.0419724	1.46415
UCON29	183	2	3.9065	0.179989	0.95728	0.179989	1.4641
MER5B	19003	108	1.40667	0.00108418	0.999506	0.000708382	1.45958
MER70-int	79	1	5.93765	0.285513	0.955213	0.285513	1.39898
MamGypLTR4	432	4	2.74525	0.112688	0.961966	0.112688	1.38135
L1M3e	291	3	3.08565	0.142507	0.957309	0.142507	1.3755
MER91C	990	8	2.24225	0.0700737	0.978038	0.0524835	1.34487
UCON55	203	2	3.60079	0.203379	0.947934	0.203379	1.27847
Charlie14a	320	3	2.97125	0.154097	0.952199	0.154097	1.27603
X7A_LINE	599	5	2.43496	0.10464	0.960211	0.10464	1.25861
Charlie4z	3595	24	1.69673	0.0250547	0.99064	0.0166015	1.22125
Eulor9C	93	1	5.25053	0.316286	0.944218	0.316286	1.19604
LTR2C_BT	181	2	3.46398	0.215327	0.942924	0.215327	1.19537
Tigger10	1003	8	2.1215	0.081471	0.9703	0.0674819	1.18166
X12_DNA	856	7	2.2518	0.0980119	0.970989	0.0700003	1.18129
Charlie26a	338	3	2.83646	0.169388	0.945183	0.169388	1.15983
Tigger20a	863	7	2.18358	0.104316	0.966223	0.0792536	1.10602
UCON33	98	1	4.80646	0.339865	0.934893	0.339865	1.06158
MLT1J1-int	337	3	2.70256	0.186575	0.936928	0.186575	1.04583
MER33	7547	46	1.48064	0.0158817	0.993043	0.0106702	1.01869
MER102a	2152	15	1.77876	0.062405	0.977762	0.0419105	1.00101
MER110A	500	4	2.34285	0.168366	0.93441	0.168366	0.950361
LTR45B_BT	104	1	4.35199	0.367856	0.922726	0.367856	0.92149
MLT1E2-int	106	1	4.20531	0.377878	0.918073	0.377878	0.875818
X5a_DNA	249	2	2.92977	0.273136	0.915611	0.273136	0.874057
BtERVF2_LTR	232	2	2.89425	0.277746	0.913275	0.277746	0.852994
MER68B	372	3	2.46488	0.222893	0.918165	0.222893	0.848464
L4_C_Mam	3249	21	1.601	0.0574698	0.975372	0.0416326	0.842308
UCON35	120	1	4.05518	0.388769	0.912765	0.388769	0.828727
Charlie29a	609	5	2.26542	0.199878	0.947195	0.13012	0.824943
MamRep4096	814	6	2.05417	0.163595	0.941422	0.131058	0.816541
Charlie30b	396	3	2.41356	0.231869	0.913251	0.231869	0.806879
Kanga11a	634	5	2.23384	0.20281	0.944274	0.135592	0.803449
Kanga1c	651	5	2.19348	0.206967	0.940271	0.142979	0.775236
L4_B_Mam	2122	14	1.66846	0.0947955	0.958453	0.0741425	0.755663
MER125	128	1	3.77533	0.410666	0.901617	0.410666	0.740789
MER5C1	416	3	2.30785	0.251851	0.901972	0.251851	0.72255
LTR86C	264	2	2.66472	0.310415	0.895631	0.310415	0.718385
CHR-1	132	1	3.69212	0.417652	0.897883	0.417652	0.714555
Tigger9b	665	5	2.08058	0.221338	0.927245	0.166183	0.692268
Charlie13b	278	2	2.55285	0.328341	0.885334	0.328341	0.653983
Chompy-6_Croc	143	1	3.43276	0.440966	0.884824	0.440966	0.632734
UCON4	141	1	3.40545	0.443551	0.883331	0.443551	0.624149
MER119	986	7	1.89243	0.211447	0.933941	0.136362	0.620976
LFSINE_Vert	1892	12	1.67148	0.145349	0.945942	0.0973244	0.620758
UCON38	141	1	3.39351	0.444696	0.882663	0.444696	0.620387
L1MC5	11002	63	1.33725	0.0346966	0.984471	0.021515	0.612006
hAT-N1_Mam	142	1	3.3346	0.450429	0.879273	0.450429	0.601829
Charlie30a	295	2	2.4368	0.348519	0.873211	0.348519	0.588233
MADE2	1614	10	1.68456	0.167164	0.931146	0.125958	0.584485
Arthur1C	557	4	2.1605	0.301931	0.914591	0.204016	0.578014
X2_LINE	150	1	3.14512	0.469892	0.867294	0.469892	0.542225
UCON78	153	1	3.11976	0.472627	0.865545	0.472627	0.534257
L1M3d	709	5	1.86908	0.261522	0.893404	0.22172	0.525599
L1MB7	16287	92	1.27795	0.03295	0.986455	0.0178413	0.524424
MER63C	722	5	1.85849	0.264071	0.891302	0.224983	0.51706
Tigger19b	2496	15	1.55273	0.156111	0.939396	0.101171	0.512015
Arthur2	753	5	1.85009	0.266137	0.889599	0.227602	0.510276
MER127	157	1	3.02295	0.483319	0.858608	0.483319	0.50395
UCON40	157	1	3.01277	0.484469	0.857851	0.484469	0.50077
LTR75B	150	1	2.99435	0.486527	0.856523	0.486527	0.495073
UCON8	160	1	2.96834	0.489558	0.854455	0.489558	0.486902
Charlie20a	592	4	1.9823	0.327134	0.888262	0.247598	0.47905
MER58D	935	6	1.81572	0.294887	0.903729	0.193259	0.456386
X6A_LINE	950	6	1.7882	0.299189	0.897917	0.202241	0.439425
MER96B	1630	10	1.617	0.242002	0.914544	0.150869	0.427207
MER94B	344	2	2.13499	0.40976	0.83292	0.40976	0.423983
X9a_DNA	443	3	2.15883	0.439721	0.882903	0.283792	0.396162
MARNA	2023	12	1.52796	0.225478	0.908173	0.152897	0.395649
ERVL-int	622	4	1.81571	0.361201	0.854996	0.298088	0.380571
X30_DNA	461	3	2.0864	0.447341	0.872035	0.301105	0.370678
MLT1D-int	424	3	2.06936	0.449257	0.869338	0.305367	0.364597
MER46C	2202	13	1.50427	0.245062	0.90917	0.14859	0.359754
ERV54-EC_LTR	1816	11	1.54267	0.274865	0.902997	0.163616	0.350791
Tigger6b	186	1	2.50815	0.548788	0.8111	0.548788	0.345712
MER91B	1047	6	1.63401	0.333232	0.857655	0.261163	0.338095
MER45A	2712	15	1.42495	0.232269	0.894171	0.164069	0.32392
MER20	13677	70	1.24431	0.0950122	0.957334	0.0552729	0.322349
Charlie10b	197	1	2.42366	0.561151	0.80108	0.561151	0.320472
MER58B	6091	33	1.32323	0.163897	0.93248	0.0947139	0.317364
Tigger16a	1175	7	1.62934	0.356483	0.875709	0.225382	0.315493
Tigger19a	2337	13	1.44398	0.259453	0.885191	0.181393	0.310577
Charlie1	1469	9	1.53604	0.320067	0.876231	0.210388	0.306364
LTR37A	1541	9	1.52575	0.32241	0.872425	0.215623	0.299633
CHR-2A	30203	151	1.18211	0.0596565	0.973895	0.0317152	0.29552
MER97b	196	1	2.33244	0.575027	0.78947	0.575027	0.293623
MLT1M	1203	7	1.58827	0.364166	0.862618	0.243816	0.292814
MER58A	10045	52	1.25957	0.139718	0.940605	0.0785018	0.284571
MER5A1	12394	62	1.23505	0.13796	0.940951	0.0762846	0.262006
UCON34	222	1	2.18335	0.599191	0.768056	0.599191	0.250582
MER58C	1818	10	1.46143	0.355978	0.859627	0.227418	0.245541
LTR33A_	1245	7	1.49481	0.388349	0.827349	0.29136	0.238235
MLT1O	2812	15	1.35941	0.306838	0.860083	0.208525	0.227287
MER74A	1374	8	1.49301	0.407792	0.844169	0.260514	0.225252
SINE2-3_BT	21456	104	1.17844	0.120108	0.943299	0.0692944	0.218034
X32_DNA	235	1	2.02153	0.627457	0.741213	0.627457	0.205542
L1M6B	336	2	2.12298	0.655455	0.831018	0.412485	0.199251
LTR84b	692	4	1.68967	0.548238	0.822354	0.343813	0.197533
MER63B	2067	11	1.38712	0.391258	0.835202	0.254265	0.192397
L3b	6997	35	1.24078	0.262181	0.882403	0.155809	0.18096
MER53	4934	25	1.27916	0.314161	0.87184	0.176849	0.178611
L2-2_Mam	364	2	1.99883	0.664817	0.80938	0.44222	0.177148
Tigger23a	370	2	1.93312	0.670648	0.79652	0.459106	0.164991
LTR33C	758	4	1.54518	0.571407	0.774615	0.405506	0.152584
LTR53	365	2	1.86043	0.677877	0.781019	0.478765	0.151227
Tigger14a	788	4	1.52999	0.574515	0.768823	0.412622	0.147673
L2-1_AMi	394	2	1.80968	0.683508	0.769226	0.493175	0.141415
LTR39B_BT	1820	10	1.35586	0.477633	0.804347	0.298109	0.140946
MER96	823	4	1.47769	0.586193	0.747692	0.438048	0.130673
MER104	1415	7	1.36291	0.535316	0.761829	0.373098	0.121226
MER94	3024	15	1.29148	0.473027	0.814496	0.265115	0.119974
MER63A	2204	11	1.30026	0.507269	0.780086	0.322072	0.111656
Charlie24	982	5	1.43632	0.618341	0.757171	0.405883	0.109058
Charlie29b	1012	5	1.40777	0.623728	0.743322	0.422297	0.101152
Tigger12A	454	2	1.58478	0.714313	0.706667	0.563806	0.0970595
L1MEb	1111	6	1.41722	0.64626	0.771218	0.373634	0.0953773
MER3	8459	40	1.16859	0.395189	0.819822	0.225992	0.0906235
Looper	437	2	1.53854	0.721948	0.691407	0.57975	0.0879474
MLT1G1	2553	13	1.25988	0.544723	0.770565	0.324314	0.0879275
MER81	2544	12	1.25103	0.534613	0.752943	0.349061	0.0878738
Tigger12	596	3	1.5831	0.74435	0.75252	0.462851	0.0849801
Charlie31a	467	2	1.51665	0.725785	0.683751	0.587524	0.0836389
L1ME4a	15591	74	1.12918	0.352384	0.83713	0.19404	0.0793945
CHR-2_BT	23727	110	1.1135	0.309612	0.856666	0.16676	0.0789747
L1MC5a	13194	64	1.1335	0.385955	0.826347	0.20859	0.0747473
LTR39_BT	2013	10	1.25579	0.609634	0.734131	0.381334	0.0706244
MamRep137	1439	7	1.3177	0.680055	0.734336	0.405349	0.0666509
MER68	1226	6	1.29267	0.667311	0.699737	0.456518	0.0650606
L1ME2z	5477	27	1.16701	0.536935	0.767454	0.296886	0.0601769
MER106B	679	3	1.40545	0.764303	0.682523	0.541139	0.0573198
LTR37B	1492	7	1.25765	0.690442	0.693299	0.451582	0.0532054
L1ME3D	2424	12	1.21045	0.644674	0.716795	0.390144	0.0525355
Charlie23a	855	4	1.39818	0.786219	0.711601	0.479572	0.0505103
CR1-3_Croc	711	3	1.35719	0.771562	0.659945	0.564535	0.0496272
Tigger15a	2999	14	1.18758	0.670197	0.71214	0.386938	0.043106
MER45C	869	4	1.33401	0.792743	0.678623	0.515631	0.0419375
Tigger2	908	4	1.311	0.795548	0.665866	0.529124	0.038806
L1ME5	1906	9	1.20276	0.727041	0.677231	0.451376	0.0368743
MLT1F2	4584	22	1.14535	0.652744	0.713975	0.363994	0.0362721
LTR11B_BT	840	4	1.28014	0.799641	0.648083	0.54761	0.0345982
Charlie15b	1327	6	1.24891	0.829943	0.669978	0.488921	0.025959
ERV1-3-LTR_BT	2373	11	1.15241	0.756064	0.649249	0.46863	0.0248542
Charlie18a	1607	7	1.18686	0.845607	0.637827	0.510881	0.018
MLT1J1	3597	16	1.12167	0.795615	0.649142	0.448225	0.0164479
Plat_L3	2036	9	1.17457	0.862197	0.651526	0.478865	0.0149476
OldhAT1	3541	15	1.10545	0.79243	0.622033	0.479844	0.0146135
CHRL	28742	125	1.05191	0.641949	0.700338	0.332261	0.0140534
Arthur1	1967	9	1.15643	0.863423	0.634194	0.497065	0.0133727
Tigger13a	2208	10	1.15111	0.86999	0.638748	0.485522	0.0122799
MLT1G	2205	10	1.14694	0.870258	0.634465	0.489999	0.0119371
Arthur1B	1859	8	1.13058	0.859327	0.598641	0.541374	0.0116583
L1MB4	6725	31	1.07324	0.78216	0.631328	0.438943	0.0108812
LTR67B	2506	11	1.13806	0.876265	0.633808	0.484832	0.0107028
L1MB5	7339	34	1.0674	0.791915	0.6272	0.44002	0.00953422
LTR33	6346	28	1.07	0.846437	0.617081	0.457427	0.00706712
ALTR2B_BT	2948	13	1.09329	0.888155	0.594823	0.515376	0.00662816
MLT1F	3356	15	1.08881	0.895364	0.59962	0.502914	0.00589189
MLT1H2	3483	15	1.08794	0.895431	0.598422	0.504129	0.00583309
L3	33484	144	1.02729	0.796633	0.614261	0.418749	0.00383533
MER41_BT	5491	24	1.06105	0.917261	0.5897	0.491548	0.00320671
L1ME4c	6269	27	1.0451	0.922513	0.567123	0.509786	0.00222928
ARLTR2	15	0	14.9454	1	0.939322	1	0
BTLTR1C1	36	0	5.24395	1	0.831053	1	0
BTLTR1D	38	0	5.54141	1	0.839102	1	0
BTLTR1E	123	0	1.74942	1	0.567983	1	0
BTLTR1E1	92	0	2.27815	1	0.648439	1	0
BTLTR1E2	66	0	3.32024	1	0.743778	1	0
BTLTR1E3	36	0	6.06462	1	0.85208	1	0
BTLTR1F	415	2	1.44297	1	0.656704	0.61433	0
BTLTR1J1	48	0	4.62712	1	0.809583	1	0
BTLTR1J2	31	0	6.85442	1	0.868482	1	0
BTLTR1J3	41	0	5.41685	1	0.835425	1	0
BTLTR1J4	148	0	1.50708	1	0.518113	1	0
Charlie10a	231	0	1.02725	1	0.380174	1	0
Charlie11	106	0	2.10008	1	0.624598	1	0
Charlie12	3	0	61.6741	1	0.987937	1	0
Charlie15a	1597	6	1.05927	1	0.510464	0.646083	0
Charlie1b	2525	10	1.02105	1	0.488071	0.633991	0
Charlie25	814	3	1.09866	1	0.507887	0.703803	0
Charlie32a	156	0	1.53249	1	0.523624	1	0
Charlie6	215	0	1.00062	1	0.370712	1	0
Charlie7b_Mars	59	0	3.87811	1	0.776461	1	0
CHR-2B	34444	148	1.00605	1	0.518628	0.514859	0
CR1-11_Crp	36	0	6.52444	1	0.861727	1	0
CR1-12_AMi	102	0	2.28191	1	0.64854	1	0
CR1-1_Amn	43	0	5.41931	1	0.835312	1	0
CR1-L3A_Croc	173	0	1.391	1	0.490055	1	0
CR1-L3B_Croc	31	0	7.63151	1	0.881016	1	0
ERV2-2B_BT-LTR	168	0	1.30318	1	0.467194	1	0
ERV2-2-I_BT	153	0	1.17564	1	0.430563	1	0
ERV2-2-LTR_BT	87	0	2.51161	1	0.675219	1	0
ERV2-3-I_BT	196	1	1.91073	1	0.720583	0.647979	0
ERV2-3-LTR_BT	209	0	1.02874	1	0.380953	1	0
Eulor11	82	0	2.87112	1	0.70938	1	0
Eulor1	65	0	3.60891	1	0.761616	1	0
Eulor6A	24	0	9.59314	1	0.904962	1	0
Eulor6B	58	0	4.03199	1	0.784041	1	0
Eulor6C	18	0	12.7747	1	0.928665	1	0
Eulor6D	57	0	4.1108	1	0.787761	1	0
Eulor6E	24	0	9.584	1	0.904876	1	0
Eulor9A	93	0	2.54936	1	0.678917	1	0
Eulor9B	27	0	8.68699	1	0.895141	1	0
Eutr2	25	0	9.09702	1	0.899898	1	0
Eutr2B	41	0	5.61554	1	0.840746	1	0
EUTREP7	202	0	1.14968	1	0.421651	1	0
EUTREP8	166	0	1.43286	1	0.500464	1	0
EutTc1-N1	42	0	5.49932	1	0.837584	1	0
EutTc1-N2	123	0	1.89936	1	0.593863	1	0
FordPrefect_a	192	0	1.2153	1	0.441864	1	0
hAT-4b_Ther	155	0	1.50203	1	0.516834	1	0
hAT-N1a_Mam	322	1	1.47215	1	0.607978	0.742263	0
HERVL40-int	827	3	1.08808	1	0.500446	0.709906	0
Kanga1a	586	2	1.19177	1	0.540814	0.7156	0
Kanga1b	296	1	1.56124	1	0.635326	0.721515	0
Kanga1d	494	2	1.44246	1	0.656283	0.614631	0
L1ME3C	1942	8	1.05323	1	0.517759	0.619848	0
L1ME4b	15805	68	1.01331	1	0.527927	0.520922	0
L1P5	129	0	1.88856	1	0.591952	1	0
L1PB4	500	2	1.3468	1	0.616693	0.651481	0
L2-1_Crp	25	0	9.19963	1	0.900955	1	0
LTR102_Mam	393	1	1.16296	1	0.489019	0.820226	0
LTR108a_Mam	60	0	3.79797	1	0.772273	1	0
LTR108b_Mam	41	0	5.48081	1	0.837176	1	0
LTR108c_Mam	34	0	6.50916	1	0.861646	1	0
LTR108d_Mam	63	0	3.57415	1	0.75972	1	0
LTR108e_Mam	115	0	1.98813	1	0.608025	1	0
LTR109A1	169	0	1.34352	1	0.477948	1	0
LTR109A2	74	0	3.10745	1	0.728459	1	0
LTR109B	192	0	1.19063	1	0.434465	1	0
LTR13_BT	924	3	1.00919	1	0.441966	0.755887	0
LTR16B	558	2	1.24096	1	0.566547	0.694723	0
LTR16D1	175	0	1.31706	1	0.470831	1	0
LTR16D2	207	0	1.11801	1	0.411423	1	0
LTR16E1	1786	7	1.04798	1	0.506053	0.639462	0
LTR18C_BT	70	0	3.27709	1	0.740674	1	0
LTR31B_BT	615	2	1.10717	1	0.492792	0.752417	0
LTR3_BT	105	0	2.06706	1	0.619963	1	0
LTR41C	576	2	1.2201	1	0.555812	0.70353	0
LTR45	11	0	19.8751	1	0.955018	1	0
LTR46_BT	183	0	1.19611	1	0.436255	1	0
LTR4_BT	559	2	1.22778	1	0.559822	0.700266	0
LTR52-int	156	0	1.41731	1	0.496867	1	0
LTR53B	148	0	1.50577	1	0.517817	1	0
LTR58	3	0	61.2159	1	0.987848	1	0
LTR69	1	0	121.501	1	0.995902	1	0
LTR6_BT	169	0	1.36212	1	0.48278	1	0
LTR71_BT	141	0	1.65457	1	0.549464	1	0
LTR73	1	0	122.101	1	0.995922	1	0
LTR73B_BT	167	0	1.37517	1	0.486154	1	0
LTR75_1	43	0	5.47342	1	0.836796	1	0
LTR75	180	0	1.26109	1	0.455308	1	0
LTR77	21	0	11.0499	1	0.917405	1	0
LTR7_BT	141	0	1.52196	1	0.521596	1	0
LTR80A	320	1	1.43122	1	0.594556	0.752038	0
LTR81A	506	2	1.39434	1	0.636972	0.632912	0
LTR82A	928	4	1.24214	1	0.624755	0.571124	0
LTR84a	470	2	1.5	1	0.677828	0.593489	0
LTR86A1	328	1	1.42058	1	0.59092	0.754625	0
LTR86A2	248	1	1.89266	1	0.716515	0.651667	0
LTR86B1	214	0	1.09266	1	0.402966	1	0
LTR86B2	174	0	1.33501	1	0.475629	1	0
LTR90B	316	1	1.51376	1	0.621053	0.732484	0
MamGypLTR1b	702	2	1.00985	1	0.431283	0.795806	0
MamGypLTR2c	560	2	1.26968	1	0.580795	0.682776	0
MamGypLTR3	367	1	1.28354	1	0.540357	0.788807	0
MamRep1894	297	1	1.6407	1	0.657423	0.703771	0
MamRep38	1240	5	1.15608	1	0.583493	0.591854	0
MamRep434	1261	5	1.13187	1	0.56418	0.610273	0
MamRTE1	6660	27	1.0131	1	0.50282	0.573587	0
MamRTE2	38	0	6.13625	1	0.853463	1	0
MamTip1b	264	1	1.81098	1	0.699041	0.667861	0
MamTip2	3091	12	1.02033	1	0.492611	0.619707	0
MARE10	58	0	4.04717	1	0.784755	1	0
MARE4	196	0	1.23845	1	0.448593	1	0
MARE6	113	0	2.02164	1	0.613106	1	0
MER103C	5840	24	1.02694	1	0.526573	0.554806	0
MER106A	489	2	1.45425	1	0.660831	0.610237	0
MER113A	1181	4	1.01203	1	0.452185	0.725951	0
MER121B	55	0	4.2442	1	0.793806	1	0
MER126	199	0	1.19321	1	0.435153	1	0
MER130	134	0	1.7407	1	0.566104	1	0
MER132	36	0	6.54568	1	0.862142	1	0
MER133A	38	0	6.28645	1	0.856693	1	0
MER134	69	0	3.43943	1	0.751271	1	0
MER136	26	0	8.75743	1	0.896079	1	0
MER21C_BT	3303	14	1.03622	1	0.520811	0.584779	0
MER31A	567	2	1.21187	1	0.55154	0.707006	0
MER45R	573	2	1.21893	1	0.555216	0.704018	0
MER67A	351	1	1.31834	1	0.553973	0.779947	0
MER68C	117	0	1.96784	1	0.604864	1	0
MER68-int	194	0	1.14536	1	0.420388	1	0
MER74C	208	0	1.10059	1	0.405681	1	0
MER76-int	147	0	1.49398	1	0.51516	1	0
MER83A-int	20	0	11.3067	1	0.919382	1	0
MER83B-int	44	0	5.40942	1	0.834953	1	0
MER87_BT	1874	8	1.09868	1	0.566508	0.573221	0
MER88	144	0	1.5849	1	0.535158	1	0
MER89-int	405	1	1.09716	1	0.457988	0.837786	0
MER90a	1089	4	1.0536	1	0.487379	0.696877	0
MER92A	177	0	1.31142	1	0.46928	1	0
MER92C	126	0	1.79501	1	0.576106	1	0
MER92D	182	0	1.28099	1	0.460863	1	0
MER95	19	0	11.7588	1	0.922545	1	0
MER97a	197	0	1.12633	1	0.414251	1	0
MER97c	185	0	1.20668	1	0.439398	1	0
MER97d	94	0	2.37461	1	0.659848	1	0
MLT1C-int	97	0	2.28898	1	0.649578	1	0
MLT1E1-int	25	0	8.80089	1	0.896717	1	0
MLT1E3-int	46	0	4.74111	1	0.813861	1	0
MLT1E-int	20	0	10.4934	1	0.913425	1	0
MLT1F1-int	164	0	1.34234	1	0.477726	1	0
MLT1F2-int	181	0	1.21162	1	0.440932	1	0
MLT1G3-int	201	0	1.09694	1	0.404556	1	0
MLT1G-int	148	0	1.51067	1	0.518922	1	0
MLT1K-int	84	0	2.76568	1	0.70009	1	0
MLT1L-int	54	0	4.18357	1	0.791228	1	0
MLT1M-int	1	0	121.118	1	0.995889	1	0
MLT1N2-int	24	0	9.38659	1	0.90298	1	0
MLT1O-int	4	0	46.8962	1	0.983121	1	0
MLT2B3	127	0	1.7797	1	0.573359	1	0
MLT2E	338	1	1.39404	1	0.581711	0.761109	0
MLT-int	197	0	1.17944	1	0.430984	1	0
Oamar1	26	0	8.32979	1	0.891057	1	0
OldhAT-N1a	11	0	19.7698	1	0.954785	1	0
OldhAT-N1c	1	0	122.794	1	0.995945	1	0
ORSL	937	3	1.02093	1	0.450958	0.74903	0
Tigger17b	68	0	3.23433	1	0.737853	1	0
Tigger17d	386	1	1.21356	1	0.511386	0.806912	0
Tigger18a	979	4	1.17357	1	0.579063	0.615278	0
Tigger1a_Mars	140	0	1.63946	1	0.54647	1	0
Tigger21a	133	0	1.73229	1	0.56457	1	0
Tigger2a	6	0	34.593	1	0.975576	1	0
Tigger2a_Car	87	0	2.76095	1	0.699543	1	0
Tigger2f	1514	6	1.03434	1	0.485932	0.668124	0
UCON11	47	0	4.91058	1	0.819572	1	0
UCON15	40	0	5.83134	1	0.84624	1	0
UCON39	75	0	3.17258	1	0.733155	1	0
UCON44	227	0	1.03769	1	0.383924	1	0
UCON58	123	0	1.92528	1	0.598034	1	0
UCON59	45	0	5.26266	1	0.830689	1	0
UCON73	158	0	1.52443	1	0.521805	1	0
UCON80	32	0	7.28395	1	0.875597	1	0
UCON81	31	0	7.69605	1	0.88195	1	0
UCON86	91	0	2.61122	1	0.685233	1	0
UCON97	39	0	6.02928	1	0.850974	1	0
X10b_DNA	146	0	1.64851	1	0.548155	1	0
X11_DNA	159	0	1.48209	1	0.5122	1	0
X12_LINE	190	0	1.27194	1	0.458223	1	0
X13_LINE	103	0	2.2747	1	0.647621	1	0
X15_LINE	181	0	1.33861	1	0.476472	1	0
X1_DNA	471	2	1.49603	1	0.676396	0.594921	0
X1_LINE	64	0	3.5358	1	0.757406	1	0
X1_LR	14	0	16.1151	1	0.943842	1	0
X20_LINE	121	0	1.94279	1	0.600857	1	0
X21_LINE	39	0	5.93062	1	0.848698	1	0
X23_DNA	58	0	4.02805	1	0.783854	1	0
X2a_DNA	264	1	1.83846	1	0.705054	0.662354	0
X2b_DNA	105	0	2.29868	1	0.650494	1	0
X33a_DNA	76	0	3.02468	1	0.722088	1	0
X34_DNA	67	0	3.55322	1	0.758271	1	0
X4a_DNA	121	0	1.95852	1	0.603316	1	0
X4b_DNA	424	1	1.12213	1	0.469921	0.831133	0
X5B_LINE	55	0	4.39248	1	0.800005	1	0
X7B_LINE	568	2	1.27675	1	0.584205	0.67987	0
X7C_LINE	398	1	1.21428	1	0.511642	0.806744	0
X7D_LINE	25	0	9.44332	1	0.903378	1	0
X8_LINE	169	0	1.42056	1	0.497432	1	0
X9b_DNA	403	1	1.1742	1	0.494043	0.817273	0
Zaphod2	542	2	1.29327	1	0.592159	0.673066	0
Zaphod5a	54	0	4.26223	1	0.794648	1	0
Zaphod5b	45	0	5.19898	1	0.828808	1	0
L4_A_Mam	4208	17	0.996396	0.905991	0.463408	0.630284	-0.000223335
L1MB8	12388	54	0.992941	0.945849	0.46208	0.591694	-0.000247101
MLT1E1A	2783	11	0.992543	0.885237	0.452279	0.66167	-0.00057171
MER20B	2830	11	0.991612	0.88525	0.450984	0.662844	-0.00064326
MLT1K	11666	48	0.986242	0.886131	0.443476	0.612871	-0.00104937
MLT1H1-int	223	0	0.994451	0.631249	0.36835	1	-0.00160381
Tigger17a	1813	7	0.981332	0.860131	0.433062	0.704272	-0.00177898
MER34A1	3423	13	0.972569	0.894143	0.424246	0.678737	-0.00194991
MLT1E3	1641	6	0.979454	0.850738	0.429221	0.717063	-0.00210259
MER102b	1949	7	0.972591	0.860376	0.423055	0.712812	-0.00261865
MER31B	1176	4	0.978324	0.824221	0.422559	0.749557	-0.00265436
MER74B	700	2	0.982931	0.775457	0.413175	0.807852	-0.00274319
LTR39D_BT	1403	5	0.961834	0.839581	0.409494	0.744913	-0.00426315
MamGypLTR3a	727	2	0.971268	0.775639	0.405123	0.813092	-0.00464081
MER115	1704	6	0.953596	0.851673	0.401476	0.740051	-0.00477976
LTR75_BT	706	2	0.968255	0.775682	0.403086	0.81442	-0.0051342
Charlie16a	749	2	0.955192	0.776047	0.393913	0.820292	-0.00728251
Tigger22N1	747	2	0.952737	0.776123	0.392196	0.821386	-0.0076884
Tigger9a	753	2	0.93909	0.776649	0.382555	0.827471	-0.00995275
MER5C	1021	3	0.926795	0.806312	0.375678	0.804007	-0.0102545
L5	503	1	0.934588	0.729827	0.3712	0.881803	-0.0133494
MER117	2617	9	0.922458	0.758862	0.35923	0.752901	-0.0139544
MLT1E1	1034	3	0.896426	0.808736	0.35014	0.821481	-0.0145428
MLT1J2	4591	17	0.925379	0.73134	0.341631	0.740794	-0.0152027
MamTip2b	3890	14	0.930136	0.707166	0.357024	0.734978	-0.0157231
L1ME3E	2474	9	0.91181	0.759915	0.345344	0.764379	-0.0158815
MERX	247	0	0.94606	0.63174	0.349807	1	-0.0159561
Tigger12c	518	1	0.918618	0.730539	0.361894	0.886116	-0.0166986
BtERVF2_I-int	424	1	0.915844	0.730521	0.360638	0.886747	-0.017295
ORSL-2a	249	0	0.941207	0.631843	0.347903	1	-0.01743
AmnSINE2	534	1	0.910464	0.730986	0.357066	0.888321	-0.0184167
Tigger1	5335	22	0.92339	0.685829	0.325489	0.746034	-0.0188332
CR1-16_AMi	250	0	0.936583	0.631949	0.346089	1	-0.0188399
Charlie7a	810	2	0.885452	0.780336	0.343531	0.851211	-0.0189061
ALTR2B1_BT	4908	19	0.926175	0.665093	0.338014	0.739947	-0.0195967
L1MCb	1695	6	0.904333	0.716362	0.347417	0.783118	-0.0210165
MER67C	1260	4	0.910965	0.670562	0.360636	0.796359	-0.0233494
MamTip3B	540	1	0.880825	0.732977	0.339388	0.896249	-0.0246984
MER90	520	1	0.877379	0.733224	0.337368	0.897147	-0.0254337
MLT1L	7677	29	0.921279	0.596606	0.304609	0.756236	-0.026534
Charlie7	2828	10	0.89553	0.665623	0.319539	0.780735	-0.0281397
AmnL2-1	1372	4	0.89141	0.67102	0.342065	0.809738	-0.0287339
MLT1H2-int	247	0	0.898377	0.633174	0.330882	1	-0.030686
LTR40a	1580	5	0.865369	0.699547	0.310635	0.820169	-0.0323731
MamGypLTR1c	559	1	0.839638	0.737005	0.314063	0.907153	-0.0334186
Charlie2b	2619	9	0.879964	0.652694	0.303643	0.798005	-0.034183
CR1_Mam	1062	3	0.885247	0.638464	0.340585	0.827864	-0.0342662
L1M3a	545	1	0.827371	0.738482	0.306422	0.910348	-0.035995
Zaphod3	1074	3	0.87667	0.638658	0.333226	0.832728	-0.0369784
MER92B	558	1	0.819143	0.739594	0.301193	0.9125	-0.0377055
HAL1	14502	58	0.915221	0.487743	0.234264	0.803761	-0.0398516
MER77	1065	3	0.853741	0.6399	0.313453	0.845573	-0.0442316
MLT2B4	3197	11	0.867639	0.586885	0.275939	0.812019	-0.0474081
Tigger11a	275	0	0.84155	0.636646	0.306892	1	-0.0488057
Zaphod4a	273	0	0.841093	0.636673	0.306711	1	-0.0489547
ERV2-1C-LTR_BT	221	0	0.825367	0.637687	0.300394	1	-0.0541025
MER21B	1128	3	0.820454	0.643901	0.284369	0.863836	-0.0545831
MLT1J	10243	38	0.889324	0.445389	0.214002	0.829461	-0.0594398
MLT1G1-int	273	0	0.80803	0.639618	0.292266	1	-0.0596832
LTR68	287	0	0.806875	0.639799	0.29165	1	-0.0600454
ERV3-16A3_LTR	844	2	0.827322	0.595572	0.299638	0.876287	-0.0615507
MamRep1527	852	2	0.822343	0.595944	0.295806	0.878395	-0.0634343
HERVL74-int	278	0	0.794816	0.641049	0.286326	1	-0.0639781
L1MEa	282	0	0.791254	0.641472	0.284693	1	-0.0651328
Charlie4	870	2	0.81727	0.596388	0.291879	0.88054	-0.0653469
MER70C	291	0	0.781854	0.64263	0.280371	1	-0.0681793
LTR82B	869	2	0.799086	0.598366	0.277838	0.888114	-0.0721685
MER87B_BT	3244	11	0.84553	0.503191	0.245544	0.835891	-0.0722021
LTR107_Mam	308	0	0.760785	0.64549	0.270582	1	-0.0749872
L1ME3A	11053	42	0.879451	0.385399	0.183456	0.854013	-0.0767408
BTLTR1C	251	0	0.753849	0.646187	0.267784	1	-0.077308
Tigger17c	311	0	0.73992	0.648667	0.260794	1	-0.0816874
Charlie8	3102	10	0.833796	0.487313	0.236856	0.845756	-0.0818672
X24_DNA	331	0	0.732635	0.64996	0.257226	1	-0.0839827
LTR16B1	897	2	0.765185	0.604173	0.25142	0.901898	-0.0844979
LTR16C	4655	16	0.85091	0.431309	0.223952	0.841428	-0.0850659
L1M6	3063	10	0.826307	0.488483	0.227208	0.85304	-0.0856444
LTR11_BT	1963	6	0.821375	0.491411	0.255142	0.851379	-0.0875948
X26_DNA	587	1	0.801331	0.528589	0.289778	0.917123	-0.0884719
BtERVF1_I-int	268	0	0.71236	0.653278	0.247912	1	-0.0904765
MLT1A-int	315	0	0.708922	0.654204	0.24592	1	-0.0914617
BTLTR1D2	538	1	0.794689	0.528657	0.285656	0.918787	-0.0917779
LTR16E2	1483	4	0.782464	0.545855	0.237558	0.879742	-0.0930491
MER76	571	1	0.791926	0.528807	0.283782	0.919521	-0.0931277
X6a_DNA	607	1	0.786763	0.52907	0.280358	0.920864	-0.0956644
LTR16A1	2048	6	0.796286	0.49427	0.227816	0.870327	-0.100576
CHR-2	14174	53	0.872992	0.302784	0.145846	0.882874	-0.101677
LTR79	2365	7	0.801662	0.426932	0.223393	0.867851	-0.117891
Charlie1a	4591	16	0.820421	0.374942	0.1794	0.876487	-0.121661
LTR39A_BT	622	1	0.721319	0.536183	0.237334	0.937104	-0.127572
LTR81B	657	1	0.71291	0.537858	0.231649	0.939138	-0.13149
MamGypLTR1a	665	1	0.707641	0.538968	0.228111	0.940395	-0.133926
LTR13B_BT	1512	4	0.762258	0.431064	0.218416	0.891575	-0.143132
LTR41	921	2	0.747817	0.45173	0.237821	0.90876	-0.14469
LTR91	949	2	0.746233	0.451846	0.236547	0.90939	-0.145698
MER31-int	2054	6	0.773686	0.402353	0.203795	0.886498	-0.146366
EuthAT-2	949	2	0.722487	0.454151	0.218011	0.918475	-0.160758
L1ME3G	11085	39	0.835108	0.215031	0.112017	0.914911	-0.173526
MLT2C1	1924	5	0.727803	0.376957	0.171119	0.91293	-0.194219
Tigger2a_Art	6323	20	0.792998	0.239764	0.121099	0.916741	-0.207531
LTR73_BT	335	0	0.686863	0.412102	0.235003	1	-0.208631
MLT1C2-int	324	0	0.686765	0.412066	0.235014	1	-0.208731
MLT1A0-int	325	0	0.682259	0.412181	0.232777	1	-0.212321
MLT1B-int	330	0	0.681441	0.412223	0.232343	1	-0.212963
ERVL-B4-int	2641	8	0.747578	0.308805	0.153793	0.911484	-0.214181
LTR65	341	0	0.673947	0.41253	0.228555	1	-0.218918
LTR80B	342	0	0.673585	0.412549	0.228369	1	-0.219205
MER52-int	323	0	0.672692	0.412516	0.228023	1	-0.219961
LTR53-int	319	0	0.669152	0.412664	0.226274	1	-0.222798
Kanga1	675	1	0.690457	0.381579	0.216578	0.94443	-0.223591
MER4B-int	350	0	0.664414	0.413039	0.223733	1	-0.226505
LTR101_Mam	673	1	0.687099	0.381587	0.214328	0.945206	-0.22653
LTR41B	677	1	0.681317	0.381692	0.210437	0.946539	-0.231564
MamTip3	695	1	0.680763	0.381735	0.21003	0.946675	-0.232028
L2	44415	167	0.869767	0.0688493	0.0338658	0.971564	-0.233931
MER110-int	346	0	0.645585	0.414437	0.214214	1	-0.241506
LTR47_BT	356	0	0.644808	0.414551	0.213771	1	-0.242096
ERV1-1C-LTR_BT	2945	9	0.740666	0.27222	0.136467	0.920355	-0.244739
LTR10B_BT	3764	11	0.739146	0.258539	0.116985	0.929574	-0.256179
LTR40b	1012	2	0.684181	0.340072	0.188256	0.932433	-0.256488
LTR39C2_BT	1004	2	0.684119	0.340064	0.188217	0.932452	-0.256555
LTR104_Mam	1045	2	0.680617	0.340164	0.185484	0.933692	-0.259953
LTR2B_BT	340	0	0.612725	0.418561	0.197297	1	-0.267298
BtERVF1_LTR	364	0	0.612038	0.418791	0.196826	1	-0.267742
MLT1J2-int	367	0	0.610495	0.419061	0.196008	1	-0.268919
LTR8_BT	373	0	0.609628	0.419235	0.19553	1	-0.269565
LTR2_BT	331	0	0.609206	0.419098	0.195506	1	-0.270044
LTR50	2007	5	0.698242	0.300183	0.143888	0.929117	-0.270819
Charlie17b	379	0	0.59948	0.421117	0.190191	1	-0.277272
LTR81C	395	0	0.591983	0.422726	0.186183	1	-0.282839
Arthur1A	784	1	0.612383	0.392119	0.164021	0.961559	-0.287654
ERV2-2B_BT-I	290	0	0.585371	0.423565	0.183214	1	-0.288233
LTR9B_EC	383	0	0.584257	0.424411	0.182145	1	-0.288587
LTR91A	1389	3	0.679061	0.301432	0.162431	0.932498	-0.290815
MER121	782	1	0.60287	0.395064	0.157706	0.96348	-0.294465
LTR40A1	404	0	0.575559	0.426664	0.177451	1	-0.294808
MLT2C2	1091	2	0.640851	0.345175	0.155376	0.946964	-0.29655
Mam_R4	410	0	0.571629	0.427737	0.175338	1	-0.297584
L1MA10	3802	11	0.733949	0.213466	0.111769	0.933096	-0.299286
LTR10_EC	399	0	0.563565	0.429974	0.171073	1	-0.30327
MLT1F-int	401	0	0.559106	0.431335	0.168679	1	-0.30632
LTR105_Mam	416	0	0.558134	0.43171	0.168108	1	-0.306919
LTR16A2	1402	3	0.662487	0.302816	0.149015	0.939252	-0.308199
MamGypLTR1d	424	0	0.553669	0.433178	0.165688	1	-0.309889
L1MC4	17797	63	0.812045	0.0858889	0.0405218	0.969071	-0.320211
LTR32_BT	1446	3	0.638803	0.308146	0.130429	0.948326	-0.330547
MLT1H1	2668	7	0.688878	0.234593	0.108911	0.942769	-0.338569
L1M3c	1913	5	0.679437	0.236937	0.127522	0.938522	-0.348697
HAL1M8	1729	4	0.647468	0.27202	0.117751	0.948497	-0.354572
L1ME3B	5002	15	0.721273	0.162646	0.0728307	0.955163	-0.371807
BTLTR1B	1609	5	0.653928	0.240202	0.106718	0.950104	-0.379581
MLT1D	15092	51	0.786139	0.0703422	0.0333825	0.975494	-0.400182
HAL1b	2713	7	0.676893	0.187721	0.0987739	0.948828	-0.409014
L1ME3F	2716	7	0.66043	0.189995	0.0856649	0.956501	-0.431689
LTR72_BT	1151	2	0.601454	0.256105	0.126754	0.958826	-0.433911
MLT1E	799	1	0.576074	0.275987	0.140069	0.968683	-0.44487
L1MB1	5913	18	0.718139	0.115864	0.0556728	0.965129	-0.447118
L1MEj	1505	3	0.601553	0.23571	0.102962	0.961114	-0.460196
L1M7	1831	4	0.617637	0.211201	0.0952707	0.959879	-0.469451
Charlie4a	2176	5	0.634598	0.187996	0.0916936	0.958155	-0.476221
X24_LINE	449	0	0.538096	0.272969	0.157234	1	-0.504151
LTR9A_EC	422	0	0.535394	0.272978	0.155856	1	-0.508234
Charlie17	432	0	0.533975	0.273056	0.155059	1	-0.510281
Eutr11	440	0	0.524663	0.273578	0.150002	1	-0.523817
LTR40c	435	0	0.524068	0.273605	0.149695	1	-0.524698
MamGyp-int	436	0	0.523944	0.273617	0.149625	1	-0.524872
LTR9_BT	435	0	0.518178	0.27409	0.146506	1	-0.533148
LTR106_Mam	447	0	0.516565	0.274281	0.145598	1	-0.535387
MamTip1	459	0	0.516486	0.274324	0.145523	1	-0.535445
MLT2B1	2876	7	0.633859	0.153384	0.0665338	0.967341	-0.535566
LTR18B_BT	435	0	0.514357	0.274472	0.144435	1	-0.53857
L1M3b	422	0	0.509909	0.274941	0.142062	1	-0.544884
MLT1C2	13169	42	0.748243	0.044722	0.021239	0.985231	-0.56465
MLT1C	5702	16	0.687117	0.0844471	0.0428125	0.974505	-0.581117
Charlie21a	477	0	0.47761	0.281411	0.124399	1	-0.587055
L1MB3	13491	44	0.748499	0.0365633	0.0192267	0.98659	-0.600544
L1M4a2	2129	5	0.605938	0.147527	0.0717733	0.968462	-0.600706
MamGypLTR2b	512	0	0.463777	0.285784	0.116845	1	-0.602979
MER21-int	490	0	0.45857	0.28757	0.114083	1	-0.608797
FordPrefect	485	0	0.452831	0.289792	0.111006	1	-0.61481
MER135	539	0	0.450099	0.291149	0.109433	1	-0.617172
Chap1a_Mam	903	1	0.528876	0.196891	0.109934	0.977014	-0.648606
ERV1-2-LTR_BT	866	1	0.523293	0.197101	0.106536	0.977911	-0.658979
Tigger1a_Art	5245	14	0.663989	0.0714367	0.0378946	0.978428	-0.677067
L1MC4a	7814	23	0.693349	0.0482175	0.0247968	0.984564	-0.695724
LTR5_BT	936	1	0.500149	0.200484	0.0925626	0.981487	-0.697621
Charlie2a	1639	3	0.55482	0.133547	0.0722877	0.974433	-0.743132
L1MB2	6384	18	0.666497	0.0471998	0.0250694	0.98527	-0.776181
L1ME3Cz	9262	27	0.690061	0.0319875	0.0162683	0.98978	-0.80014
L1MD3	4727	12	0.628837	0.0587684	0.0292579	0.984418	-0.823741
L1ME3	6560	18	0.655044	0.0391106	0.0204097	0.988188	-0.859175
MLT1I-int	510	0	0.446249	0.182218	0.107422	1	-0.860729
LTR83	527	0	0.440247	0.182406	0.10418	1	-0.874646
MER110	530	0	0.438401	0.182497	0.10319	1	-0.878867
LTR78	2866	6	0.565069	0.0835453	0.0374419	0.983828	-0.887798
MLT2B2	962	1	0.476571	0.140742	0.0790146	0.984798	-0.910537
LTR37-int	944	1	0.475041	0.140774	0.0781753	0.984999	-0.914383
ORSL-2b	554	0	0.42045	0.18438	0.0936371	1	-0.917854
MER105	573	0	0.417866	0.184849	0.0922507	1	-0.922993
L1MDb	948	1	0.464369	0.141619	0.0723179	0.986376	-0.939419
L1MEg2	558	0	0.408768	0.186665	0.0875179	1	-0.9408
LTR33B	1015	1	0.463498	0.141804	0.0718013	0.986494	-0.941089
L1MEh	1756	3	0.515791	0.10131	0.0506095	0.983148	-0.949741
Charlie10	1009	1	0.455968	0.143013	0.067788	0.987417	-0.956955
LTR78B	1875	3	0.501442	0.104054	0.0436245	0.985813	-0.978657
Cheshire	1027	1	0.442076	0.146638	0.0606043	0.989031	-0.981858
HERV16-int	1381	2	0.487385	0.103593	0.0560731	0.984632	-1.02097
LTR16	2277	4	0.507358	0.0745426	0.0326243	0.988333	-1.10383
ALTR2C_BT	3588	8	0.561736	0.0433027	0.022192	0.989924	-1.13447
MLT1H	7093	18	0.621197	0.0220166	0.0103434	0.994287	-1.13833
MLT1N2	3474	7	0.547977	0.0468582	0.0230765	0.989989	-1.15351
MER21C	7201	19	0.62459	0.0199483	0.00961646	0.994635	-1.1544
L1MEd	10517	30	0.659398	0.0118924	0.00571618	0.996525	-1.15634
MER34A	5230	12	0.584964	0.0314921	0.0139012	0.993049	-1.16176
ERV2-1-I_BT	1712	3	0.481684	0.07705	0.0350095	0.988994	-1.17317
LTR16B2	1076	1	0.426283	0.100846	0.0528292	0.99072	-1.22561
MER57LA	1149	1	0.40736	0.104388	0.0441315	0.992534	-1.27146
L1MD1	4565	11	0.569095	0.0272532	0.0126996	0.993874	-1.27241
MLT1I	7424	18	0.601949	0.0148192	0.00665766	0.996425	-1.33948
LTR16A	3149	6	0.513517	0.0391794	0.0181611	0.992775	-1.3528
Charlie22a	673	0	0.352506	0.125549	0.0592699	1	-1.35564
MLT1H-int	643	0	0.351842	0.125645	0.0589832	1	-1.35759
L1M	706	0	0.343642	0.128017	0.0550866	1	-1.37572
L1MEg1	665	0	0.339986	0.12916	0.0534339	1	-1.38349
ERV2-1B-LTR_BT	524	0	0.340655	0.128527	0.0538974	1	-1.38428
LTR39C_BT	2817	5	0.49623	0.0410059	0.0195807	0.992734	-1.4023
ALTR39_BT	2349	4	0.475928	0.0420735	0.0214014	0.992754	-1.47394
HAL1ME	4723	10	0.541574	0.0183846	0.00940452	0.995716	-1.53556
Kanga2_a	1176	1	0.392223	0.0717983	0.0377134	0.993818	-1.54454
MamGypsy2-I	1633	2	0.424833	0.056011	0.028716	0.992986	-1.54592
Mariner1_BT	8287	19	0.581433	0.00731907	0.0032622	0.998293	-1.67067
L1ME1	20665	63	0.676632	0.000931685	0.000421594	0.999727	-1.70799
LTR18A_BT	676	0	0.33104	0.0825133	0.0493682	1	-1.72806
LTR16D	714	0	0.328349	0.082592	0.0481402	1	-1.74015
MLT1A0	11455	29	0.604692	0.00245247	0.00117712	0.99934	-1.89444
L1ME2	9120	23	0.583186	0.00340546	0.00160605	0.999144	-1.9199
L1M3de	3240	6	0.458682	0.0135356	0.00664916	0.997605	-2.10103
L1MEg	8935	22	0.570423	0.00241688	0.00128354	0.999332	-2.11929
L1MCc	2220	3	0.403397	0.0235502	0.0112245	0.996971	-2.13224
Zaphod	1823	2	0.375672	0.0301671	0.0141662	0.996886	-2.14759
ERV1-2C-LTR_BT	2667	4	0.422243	0.018044	0.00868847	0.99735	-2.16887
MER34B-int	1326	1	0.344696	0.0359793	0.0208734	0.996932	-2.21877
LTR52	809	0	0.284902	0.0562115	0.030303	1	-2.26465
LTR1_BT	3520	6	0.444647	0.0103938	0.00488045	0.99829	-2.31892
L1M4c	4692	10	0.483564	0.00557122	0.0023953	0.999014	-2.36274
ERV1-1-LTR_BT	2348	3	0.380525	0.0126167	0.0072519	0.998141	-2.64716
MLT1B	14952	37	0.585794	0.000309647	0.000138324	0.999924	-2.70742
MLT1E2	3319	5	0.40896	0.00785055	0.00361051	0.998871	-2.71551
L1_Art	61925	188	0.714496	2.09473e-06	9.78168e-07	0.999999	-2.75426
MER67D	940	0	0.244932	0.0398844	0.0171204	1	-2.83974
L1MC3	10455	25	0.544435	0.000538237	0.000246122	0.999876	-2.86749
Bov-tA2	537541	2046	0.814323	1.79809e-10	9.63872e-11	1	-2.88777
L1MC2	4818	8	0.413723	0.00154912	0.000711624	0.999754	-3.57776
ERVL-E-int	5269	9	0.423412	0.00117812	0.000573095	0.999794	-3.63134
L1MEi	3195	4	0.354159	0.00299944	0.00171057	0.999554	-3.77821
MLT2D	3287	4	0.352793	0.00300487	0.00164245	0.999573	-3.79109
MER92-int	1033	0	0.215582	0.0175338	0.00984282	1	-3.88751
ERV1-1-I_BT	2389	3	0.328994	0.00362256	0.00209559	0.999528	-3.91502
MER45B	1060	0	0.211619	0.0177798	0.00902557	1	-3.92097
BLACKJACK	1711	1	0.261851	0.00925971	0.0042576	0.999507	-3.93094
BTLTR1B1	852	0	0.208383	0.0180208	0.0084224	1	-3.94664
L1MD2	8184	16	0.456997	0.000172721	8.36533e-05	0.999966	-4.25083
L1M4	19274	48	0.555983	5.94528e-06	2.74201e-06	0.999999	-4.42569
L1M8	1100	0	0.202038	0.0118916	0.00722035	1	-4.441
MLT1G3	2427	2	0.282571	0.00302269	0.00171423	0.999707	-4.59404
L1MC	8201	15	0.440151	0.00010544	5.78679e-05	0.999977	-4.70848
L1MEc	13196	29	0.493009	1.14872e-05	5.1971e-06	0.999998	-5.04014
MER89	1227	0	0.18707	0.00811076	0.00486352	1	-5.05661
MLT1J-int	1233	0	0.186211	0.00811899	0.00474542	1	-5.06943
BtERV3B_LTR	1242	0	0.184254	0.00816357	0.00448342	1	-5.0955
L1MCa	6970	12	0.400967	8.19259e-05	3.95657e-05	0.999986	-5.38793
MLT1A	7995	13	0.404511	4.81068e-05	2.62515e-05	0.999991	-5.63796
MLT2F	1455	0	0.156471	0.00401767	0.00171665	1	-6.41184
L1M5	35493	87	0.559776	2.64817e-09	1.39618e-09	1	-7.17967
L1MA9	46448	124	0.591461	3.0776e-10	1.49332e-10	1	-7.20656
ERV1-1B-LTR_BT	4192	4	0.272057	0.000134667	6.5886e-05	0.999987	-7.26931
ERV1-2-I_BT	3170	3	0.251569	0.000200127	0.000106549	0.999981	-7.36401
L1M4b	3445	3	0.250737	0.000202131	0.000101807	0.999982	-7.37305
L1MEf	7902	12	0.353897	5.22207e-06	2.31312e-06	0.999999	-7.91584
LTR10A_BT	1629	0	0.136553	0.00121172	0.000678636	1	-8.37782
L1-2_BT	111037	333	0.656174	5.47501e-15	2.97328e-15	1	-8.66893
L1MDa	5337	6	0.279753	1.14726e-05	6.53402e-06	0.999999	-9.07922
Bov-tA1	216595	687	0.698873	8.80858e-19	4.60479e-19	1	-9.33264
ERV1-3-I_BT	3480	2	0.194677	5.20214e-05	2.89264e-05	0.999996	-10.1134
L1MD	8674	11	0.30965	3.43499e-07	1.75083e-07	1	-10.9326
L1MC1	14321	24	0.380002	8.44571e-09	3.87533e-09	1	-11.2698
ERV3-16A3_I-int	4261	3	0.20558	1.00427e-05	5.47232e-06	0.999999	-11.4069
L1M4a1	2024	0	0.106917	0.000187567	8.99969e-05	1	-12.0207
L1M2	9462	10	0.253928	2.98035e-09	1.55964e-09	1	-16.8597
L1M3	16123	22	0.308241	2.75058e-12	1.22144e-12	1	-19.6283
Bov-A2	362131	1117	0.625819	3.20003e-42	1.84431e-42	1	-28.0581
BTLTR1J	22110	19	0.218988	1.62714e-19	8.78105e-20	1	-41.1672
L1-3_BT	58431	104	0.350259	1.03731e-36	5.96209e-37	1	-54.4621
ERV2-1-LTR_BT	8097	0	0.0273815	3.11166e-16	1.77978e-16	1	-80.4915
Bov-tA3	345315	847	0.488867	2.91663e-85	1.76769e-85	1	-87.2813
L1_BT	88749	85	0.169366	1.43813e-109	6.09965e-110	1	-278.83
BTLTR1	82729	26	0.073188	6.57272e-114	2.71563e-114	1	-426.952
BovB	562047	1006	0.154469	1.97974e-200	1.59068e-200	1	-538.122

## Sheet: IFNG-inducible POLR2A
TE family	TE family size	Number of overlaps	Odds ratio	Fisher's two tail	Fisher's left tail	Fisher's right tail	Combo score
Looper	437	7	9.83975	2.43673e-05	0.999998	2.43673e-05	15.2172
MER90a	1089	11	6.0001	8.97553e-06	0.999999	8.97553e-06	13.0463
MER41_BT	5491	30	3.12156	2.77288e-07	1	2.77288e-07	10.7684
SINE2-1_BT	34074	116	2.02116	9.89086e-11	1	6.9819e-11	10.1567
MER3	8459	38	2.60663	7.82762e-07	1	5.89429e-07	8.44015
Charlie1	1469	11	4.37709	0.00014506	0.999968	0.00014506	8.1758
UCON80	32	1	34.5108	0.0563062	0.998435	0.0563062	6.38338
L1MB8	12388	48	2.13809	5.33529e-06	0.999998	4.5728e-06	5.78075
BTLTR1C	251	3	7.62468	0.0165199	0.997902	0.0165199	5.22244
EuthAT-N1	48	1	22.8252	0.0838925	0.996455	0.0838925	4.85676
SINE2-2_BT	46989	133	1.66669	2.94106e-07	1	2.1159e-07	4.81363
MIRb	166108	390	1.46882	4.21032e-09	1	2.45664e-09	4.64561
LTR109A1	169	2	9.55585	0.0403235	0.995919	0.0403235	4.54084
Bov-A2	362131	751	1.46613	8.9396e-09	1	4.44372e-09	4.44297
MIR3	62466	167	1.58508	3.16549e-07	1	1.88814e-07	4.31929
L2b	65106	174	1.56347	3.73352e-07	1	2.53146e-07	4.14438
L1M3d	709	5	4.44788	0.0125308	0.997289	0.0125308	4.09528
MER113	2460	12	2.89995	0.00243398	0.999189	0.00243398	4.01469
BTLTR1E2	66	1	15.9321	0.117966	0.992863	0.117966	3.70729
MER20B	2830	13	2.70839	0.00279567	0.999003	0.00279567	3.67051
Zaphod	1823	9	2.9599	0.00819549	0.997342	0.00819549	3.2664
L1ME4b	15805	50	1.77794	0.000334346	0.999862	0.000250717	2.88562
LTR72_BT	1151	6	3.29624	0.0217773	0.993699	0.0217773	2.86
Kanga2_a	1176	6	3.22693	0.023823	0.992968	0.023823	2.74314
MER31B	1176	6	3.21548	0.0241822	0.992838	0.0241822	2.72386
LTR45B_BT	104	1	10.2201	0.17772	0.983345	0.17772	2.51589
Charlie11	106	1	9.98378	0.18152	0.982597	0.18152	2.46007
LTR13B_BT	1512	7	2.86331	0.0245665	0.991844	0.0245665	2.44295
MER102c	1830	8	2.7187	0.0204934	0.992825	0.0204934	2.4362
UCON58	123	1	8.93937	0.200456	0.978594	0.200456	2.20574
Charlie7a	810	4	3.41278	0.0618026	0.982921	0.0618026	2.14106
CHR-1	132	1	8.43548	0.21107	0.976156	0.21107	2.07838
L2d	16765	49	1.67324	0.00162159	0.999414	0.00100686	2.07202
L1MC5	11002	35	1.7746	0.00343739	0.998839	0.00212447	2.03875
MER130	134	1	8.12461	0.21819	0.974446	0.21819	1.99824
MIRc	76415	183	1.40229	8.23659e-05	0.999968	4.60684e-05	1.99224
MIR	133102	301	1.34679	2.4546e-05	0.99999	1.36265e-05	1.98013
MARE8	138	1	8.02959	0.220467	0.973882	0.220467	1.97347
X26_DNA	587	3	3.72868	0.0946205	0.976158	0.0946205	1.94426
X12_DNA	856	4	3.23	0.0723148	0.978962	0.0723148	1.92966
Chompy-6_Croc	143	1	7.82135	0.22562	0.972584	0.22562	1.9188
MER4B-int	350	2	4.66017	0.136862	0.972362	0.136862	1.91778
Charlie1b	2525	10	2.3811	0.0299195	0.991809	0.0205079	1.90753
Tigger12	596	3	3.66998	0.0980294	0.97493	0.0980294	1.89198
X10b_DNA	146	1	7.60145	0.231325	0.971111	0.231325	1.86046
L1MB3	13491	41	1.67552	0.00342734	0.998569	0.0024724	1.83549
L1MC5a	13194	40	1.69096	0.00396903	0.99863	0.00238898	1.81982
L1ME3G	11085	34	1.72707	0.0050209	0.997944	0.00367137	1.81253
L2a	117287	271	1.33966	6.19712e-05	0.999973	3.59771e-05	1.77511
LTR53	365	2	4.37522	0.151204	0.967604	0.151204	1.747
MER68B	372	2	4.31936	0.154273	0.966545	0.154273	1.71337
LTR75B	150	1	7.05105	0.246938	0.966867	0.246938	1.71159
UCON8	160	1	6.84793	0.253253	0.965048	0.253253	1.65554
X7C_LINE	398	2	4.18802	0.16186	0.963868	0.16186	1.63413
Kanga1c	651	3	3.37058	0.118149	0.967298	0.118149	1.62603
LTR52-int	156	1	6.74109	0.256692	0.964047	0.256692	1.62588
ALTR2C_BT	3588	13	2.07775	0.029936	0.990235	0.021339	1.60765
ORSL	937	4	2.94681	0.093276	0.970457	0.093276	1.60629
X8_LINE	169	1	6.5527	0.263014	0.962139	0.263014	1.57307
X9b_DNA	403	2	4.08179	0.168411	0.961496	0.168411	1.56985
MamRep38	1240	5	2.66955	0.078369	0.972575	0.078369	1.56655
LTR40A1	404	2	4.03432	0.171464	0.96037	0.171464	1.54109
CR1-L3A_Croc	173	1	6.41003	0.268003	0.960604	0.268003	1.53278
Tigger9b	665	3	3.23454	0.129073	0.96289	0.129073	1.50586
Charlie16	971	4	2.79868	0.107169	0.964411	0.107169	1.44011
UCON29	183	1	5.97867	0.28429	0.955357	0.28429	1.4092
LTR9A_EC	422	2	3.79177	0.18841	0.953878	0.18841	1.39388
MER33	7547	23	1.75229	0.0200344	0.99229	0.0141122	1.37427
Charlie17	432	2	3.75277	0.191361	0.952704	0.191361	1.37019
Tigger6b	186	1	5.82469	0.290587	0.953231	0.290587	1.36445
LTR9_BT	435	2	3.67248	0.197657	0.950165	0.197657	1.3214
AmnL2-1	1372	5	2.44919	0.102929	0.96103	0.102929	1.2761
BTLTR1F	415	2	3.54459	0.20833	0.945744	0.20833	1.2437
LTR84a	470	2	3.47831	0.214187	0.943229	0.214187	1.20349
Tigger19a	2337	8	2.13426	0.0802243	0.971118	0.065951	1.1984
LTR86B1	214	1	5.08597	0.32509	0.940561	0.32509	1.14509
L1ME2z	5477	17	1.76535	0.0408192	0.982487	0.032622	1.13902
MER110A	500	2	3.25377	0.235938	0.933536	0.235938	1.06757
Tigger6	224	1	4.82515	0.339278	0.934847	0.339278	1.06591
Charlie6	215	1	4.80003	0.340697	0.93427	0.340697	1.05827
LTR39_BT	2013	7	2.1378	0.109543	0.962423	0.0864469	1.05273
Charlie8	3102	10	1.94047	0.0861401	0.969145	0.0640071	1.01837
X32_DNA	235	1	4.66282	0.348744	0.93086	0.348744	1.01619
Charlie25	814	3	2.5958	0.202067	0.929041	0.202067	0.955763
X5a_DNA	249	1	4.45361	0.361733	0.925167	0.361733	0.951662
MamTip3B	540	2	3.0537	0.258122	0.922981	0.258122	0.947289
MER113A	1181	4	2.3342	0.170084	0.933441	0.170084	0.940846
ORSL-2a	249	1	4.37535	0.366832	0.922866	0.366832	0.927423
CR1-16_AMi	250	1	4.3553	0.368163	0.922258	0.368163	0.921197
Zaphod2	542	2	3.00478	0.264003	0.920074	0.264003	0.918056
Arthur1C	557	2	2.97098	0.26818	0.917976	0.26818	0.897907
ORSL-2b	554	2	2.94153	0.271897	0.916094	0.271897	0.880386
X7B_LINE	568	2	2.92881	0.273525	0.915259	0.273525	0.872831
ERV54-EC_LTR	1816	6	2.09055	0.158368	0.945439	0.123919	0.851462
BTLTR1D2	538	2	2.86344	0.282116	0.910827	0.282116	0.834113
Tigger13a	2208	7	1.9553	0.137715	0.942821	0.121438	0.83294
Chap1a_Mam	903	3	2.4433	0.226843	0.915918	0.226843	0.830359
AmnSINE1	1905	6	2.04849	0.164716	0.940569	0.132554	0.810333
MER94	3024	9	1.84685	0.127332	0.950008	0.0996911	0.792188
X7A_LINE	599	2	2.77671	0.294126	0.904429	0.294126	0.783052
Tigger15a	2999	9	1.83106	0.130131	0.947668	0.103566	0.772859
LTR13_BT	924	3	2.34788	0.244304	0.906203	0.244304	0.753677
X6a_DNA	607	2	2.72274	0.301968	0.900155	0.301968	0.751488
CHRL	28742	69	1.3632	0.0226879	0.990808	0.0129457	0.734952
Charlie30a	295	1	3.72609	0.41529	0.898853	0.41529	0.724241
Penelope1_Vert	975	3	2.29267	0.255174	0.899955	0.255174	0.710033
Kanga1b	296	1	3.63791	0.422839	0.894765	0.422839	0.696477
L1ME3C	1942	6	1.92449	0.187836	0.923233	0.162044	0.685902
MER45A	2712	8	1.83935	0.166657	0.938164	0.123584	0.68417
ERV1-1-I_BT	2389	8	1.83702	0.167049	0.937774	0.124234	0.681849
Charlie24	982	3	2.21705	0.271052	0.890572	0.271052	0.651221
CHRL1_BT	18852	46	1.39582	0.0444308	0.981148	0.027425	0.650611
MamRTE1	6660	18	1.58562	0.107345	0.962057	0.0640119	0.644579
Charlie14a	320	1	3.41095	0.443563	0.88301	0.443563	0.62495
hAT-5_Mam	665	2	2.45813	0.345044	0.875172	0.345044	0.599636
MER106B	679	2	2.42682	0.350702	0.871698	0.350702	0.582056
Charlie26a	338	1	3.24676	0.459813	0.873255	0.459813	0.573275
LTR101_Mam	673	2	2.4059	0.354555	0.869312	0.354555	0.57036
MLT1A0-int	325	1	3.2342	0.46109	0.872482	0.46109	0.569349
LTR73_BT	335	1	3.21234	0.463359	0.871068	0.463359	0.562469
ERV1-1-LTR_BT	2348	7	1.80468	0.224854	0.918366	0.161576	0.552015
MamTip3	695	2	2.36343	0.36256	0.864277	0.36256	0.546757
LTR65	341	1	3.15324	0.469581	0.867164	0.469581	0.54392
Tigger19b	2496	7	1.77757	0.230032	0.912894	0.170147	0.529656
MIR1_Amn	9606	24	1.45893	0.11225	0.954732	0.0700959	0.517568
LTR2_BT	331	1	2.98483	0.488189	0.855077	0.488189	0.491298
BtERVF1_LTR	364	1	2.89569	0.498652	0.847947	0.498652	0.46355
Charlie16a	749	2	2.20158	0.39546	0.842646	0.39546	0.458716
Tigger17d	386	1	2.8134	0.508682	0.840918	0.508682	0.438075
L2-1_AMi	394	1	2.77682	0.51326	0.837644	0.51326	0.426799
Tigger18a	979	3	2.19383	0.436758	0.88748	0.276172	0.40777
L1MB5	7339	19	1.44323	0.174737	0.927721	0.112009	0.401004
MER5C	1021	3	2.14414	0.441475	0.880499	0.287528	0.390746
LTR39C2_BT	1004	3	2.13762	0.442128	0.879548	0.28906	0.388483
MER5C1	416	1	2.64193	0.530824	0.824687	0.530824	0.385507
MER91B	1047	3	2.12894	0.44303	0.878258	0.291116	0.385435
MLT1F-int	401	1	2.63867	0.53125	0.824377	0.53125	0.384529
L1ME4a	15591	37	1.33293	0.128706	0.946456	0.0753223	0.369166
Charlie1a	4591	12	1.48981	0.235842	0.893821	0.173046	0.360823
L1MEj	1505	4	1.76962	0.373115	0.843563	0.314418	0.35256
Charlie19a	1086	3	2.02456	0.455158	0.861463	0.317274	0.347857
MER20	13677	32	1.33392	0.154369	0.933308	0.0944024	0.337291
LTR40c	435	1	2.45801	0.556636	0.804456	0.556636	0.330119
Tigger12A	454	1	2.42388	0.561692	0.800308	0.561692	0.319971
Tigger1a_Art	5245	13	1.44842	0.257977	0.886516	0.179808	0.314496
L2c	78346	165	1.18559	0.0589438	0.974648	0.0309102	0.301981
X1_DNA	471	1	2.30609	0.579763	0.78504	0.579763	0.285389
Charlie21a	477	1	2.24026	0.590323	0.775763	0.590323	0.266375
MER106A	489	1	2.23412	0.591334	0.774852	0.591334	0.264606
MER5A	27050	59	1.24104	0.141993	0.937347	0.0815258	0.264114
Kanga1d	494	1	2.21435	0.594585	0.771932	0.594585	0.258951
MER21-int	490	1	2.16164	0.603397	0.763895	0.603397	0.243997
LTR16A1	2048	5	1.58804	0.436926	0.818544	0.328741	0.239936
MamGypLTR2b	512	1	2.14208	0.606743	0.760776	0.606743	0.23848
Tigger12c	518	1	2.11694	0.611076	0.756711	0.611076	0.23144
X6b_DNA	527	1	2.09357	0.615154	0.752839	0.615154	0.224937
X9_LINE	538	1	2.06765	0.619734	0.748437	0.619734	0.217767
MER90	520	1	2.05355	0.622236	0.746025	0.622236	0.213899
L3b	6997	16	1.34486	0.321279	0.85882	0.207889	0.210784
MER110	530	1	2.04115	0.624466	0.743844	0.624466	0.2105
Charlie15b	1327	3	1.64661	0.525895	0.772727	0.438278	0.200812
MER34A1	3423	8	1.44326	0.419795	0.821396	0.290346	0.199538
L1ME3D	2424	6	1.53154	0.474323	0.821572	0.31014	0.19921
LTR67B	2506	6	1.53129	0.474381	0.821471	0.310268	0.1991
Tigger14a	788	2	2.10294	0.657127	0.827261	0.417538	0.195554
OldhAT1	3541	8	1.41904	0.426947	0.809423	0.305575	0.186629
MamRep1879	811	2	2.04508	0.66138	0.817338	0.431264	0.185323
CHR-2_BT	23727	51	1.20774	0.243701	0.893638	0.135914	0.166967
ERV1-2-LTR_BT	866	2	1.8449	0.679877	0.776913	0.48361	0.148055
L2d2	31234	65	1.17682	0.244769	0.887323	0.139724	0.143575
Tigger2	908	2	1.81059	0.683717	0.768876	0.4934	0.141422
MER58D	935	2	1.77583	0.68782	0.760367	0.503574	0.13465
LTR41	921	2	1.74755	0.691315	0.753174	0.512034	0.129115
Charlie4z	3595	8	1.3911	0.548828	0.794656	0.32402	0.124086
EuthAT-2	949	2	1.69107	0.698778	0.737958	0.529482	0.117981
Tigger10	1003	2	1.6268	0.708073	0.7192	0.550228	0.10525
Charlie10	1009	2	1.59821	0.712488	0.71034	0.55976	0.09959
LTR104_Mam	1045	2	1.57147	0.71679	0.701727	0.568859	0.0943009
MER112	2787	6	1.3828	0.65063	0.752844	0.395756	0.0872833
MER104	1415	3	1.56073	0.7465	0.744239	0.472531	0.0815425
L1MB2	6384	14	1.24437	0.559958	0.766084	0.326087	0.0794365
MER5A1	12394	25	1.16464	0.521808	0.753452	0.315827	0.0621144
MER21C_BT	3303	7	1.29329	0.683678	0.717849	0.424335	0.0612767
Tigger2f	1514	3	1.3921	0.766402	0.675938	0.54801	0.0551448
MER87_BT	1874	4	1.4264	0.783964	0.724551	0.464948	0.0541608
SINE2-3_BT	21456	43	1.13316	0.512775	0.772935	0.277466	0.052314
L1ME5	1906	4	1.40359	0.78582	0.71377	0.477154	0.0511997
LTR33A	1606	3	1.34791	0.773235	0.654898	0.569626	0.0481076
L1ME3Cz	9262	19	1.15774	0.627218	0.71244	0.372355	0.0428088
L1ME1	20665	43	1.11518	0.569835	0.741656	0.31183	0.0384135
CHR-2	14174	29	1.13707	0.621183	0.732592	0.333748	0.0383208
MLT1G3	2427	5	1.3257	0.810295	0.69857	0.47331	0.03716
L4_B_Mam	2122	4	1.2811	0.799644	0.648103	0.547575	0.0347026
MER102a	2152	4	1.27343	0.800741	0.643531	0.552247	0.0336548
L1ME3E	2474	5	1.28563	0.813741	0.674321	0.499697	0.0324469
L1MD2	8184	17	1.15359	0.700749	0.694967	0.396555	0.0318336
MER117	2617	5	1.26843	0.815495	0.663341	0.511376	0.0303863
ERV1-1B-LTR_BT	4192	8	1.15023	0.857025	0.617173	0.522799	0.0135303
HAL1ME	4723	9	1.14679	0.864041	0.624302	0.507552	0.0125408
Tigger2a_Art	6323	12	1.13106	0.88122	0.633504	0.480373	0.00975696
CHR-2B	34444	64	1.01907	0.948473	0.543721	0.507683	0.00062619
AmnHarb1	97	0	5.54982	1	0.836801	1	0
AmnSINE2	534	0	1.03767	1	0.382664	1	0
ARLTR2	15	0	34.3673	1	0.973114	1	0
Arthur1A	784	1	1.40612	1	0.584989	0.758638	0
Arthur2	753	1	1.42799	1	0.592496	0.753321	0
BovB	562047	426	1.19544e-06	8.53493e-201	8.53493e-201	1	0
BtERV3B_LTR	1242	2	1.29443	1	0.592032	0.673081	0
BtERVF1_I-int	268	0	1.76975	1	0.569948	1	0
BtERVF2_I-int	424	0	1.12971	1	0.41403	1	0
BtERVF2_LTR	232	0	2.25582	1	0.643467	1	0
BTLTR1B	1609	3	1.11389	1	0.51795	0.695471	0
BTLTR1B1	852	1	1.06201	1	0.439669	0.847602	0
BTLTR1C1	36	0	12.9781	1	0.927845	1	0
BTLTR1D	38	0	13.22	1	0.929016	1	0
BTLTR1E	123	0	4.16766	1	0.788399	1	0
BTLTR1E1	92	0	5.47253	1	0.834791	1	0
BTLTR1E3	36	0	14.2757	1	0.934177	1	0
BTLTR1J1	48	0	10.851	1	0.913759	1	0
BTLTR1J2	31	0	16.267	1	0.942241	1	0
BTLTR1J3	41	0	12.6873	1	0.926012	1	0
BTLTR1J4	148	0	3.54622	1	0.755938	1	0
Chap1_Mam	231	0	2.34714	1	0.654594	1	0
Charlie10a	231	0	2.36465	1	0.656648	1	0
Charlie10b	197	0	2.77331	1	0.698813	1	0
Charlie12	3	0	140.158	1	0.994668	1	0
Charlie13a	436	0	1.21866	1	0.441484	1	0
Charlie13b	278	0	1.95205	1	0.600582	1	0
Charlie17b	379	0	1.40294	1	0.491638	1	0
Charlie22a	673	1	1.62795	1	0.653115	0.707084	0
Charlie29a	609	1	1.75365	1	0.684995	0.680142	0
Charlie30b	396	0	1.37882	1	0.485525	1	0
Charlie31a	467	0	1.1631	1	0.424517	1	0
Charlie32a	156	0	3.51535	1	0.754001	1	0
Charlie4	870	1	1.25582	1	0.528242	0.796367	0
Charlie7b_Mars	59	0	9.00847	1	0.896685	1	0
CHR-2A	30203	55	1.00237	1	0.490652	0.564206	0
CR1-11_Crp	36	0	14.9494	1	0.937045	1	0
CR1-12_AMi	102	0	5.28073	1	0.829161	1	0
CR1-13_AMi	69	0	7.82934	1	0.881811	1	0
CR1-1_Amn	43	0	12.4747	1	0.924718	1	0
CR1-L3B_Croc	31	0	17.4097	1	0.945924	1	0
CR1_Mam	1062	1	1.02254	1	0.419066	0.858316	0
DNA1_Mam	135	0	4.02046	1	0.781418	1	0
ERV1-1C-LTR_BT	2945	5	1.05647	1	0.499201	0.669619	0
ERV1-3-I_BT	3480	6	1.06999	1	0.520534	0.637054	0
ERV2-1B-LTR_BT	524	1	1.73471	1	0.680592	0.684037	0
ERV2-1C-LTR_BT	221	0	2.08031	1	0.62008	1	0
ERV2-2B_BT-I	290	0	1.5089	1	0.517109	1	0
ERV2-2B_BT-LTR	168	0	3.0878	1	0.725001	1	0
ERV2-2-I_BT	153	0	2.97459	1	0.716354	1	0
ERV2-2-LTR_BT	87	0	5.94406	1	0.846918	1	0
ERV2-3-I_BT	196	0	2.37888	1	0.658557	1	0
ERV2-3-LTR_BT	209	0	2.45413	1	0.666932	1	0
Eulor11	82	0	6.61031	1	0.861302	1	0
Eulor1	65	0	8.31061	1	0.888349	1	0
Eulor6A	24	0	22.0352	1	0.957407	1	0
Eulor6B	58	0	9.28932	1	0.899673	1	0
Eulor6C	18	0	29.2109	1	0.968117	1	0
Eulor6D	57	0	9.46289	1	0.901447	1	0
Eulor6E	24	0	22.0221	1	0.957383	1	0
Eulor9A	93	0	5.85712	1	0.844721	1	0
Eulor9B	27	0	19.8477	1	0.95262	1	0
Eulor9C	93	0	5.92451	1	0.846342	1	0
EuthAT-N1a	38	0	14.145	1	0.933495	1	0
Eutr11	440	0	1.22079	1	0.442103	1	0
Eutr2	25	0	21.0045	1	0.955295	1	0
Eutr2B	41	0	12.9794	1	0.927615	1	0
EUTREP16	245	0	2.2407	1	0.641479	1	0
EUTREP7	202	0	2.66724	1	0.688897	1	0
EUTREP8	166	0	3.29355	1	0.739716	1	0
EutTc1-N1	42	0	12.6984	1	0.926033	1	0
EutTc1-N2	123	0	4.392	1	0.798022	1	0
FordPrefect	485	0	1.07287	1	0.395003	1	0
FordPrefect_a	192	0	2.81431	1	0.702505	1	0
hAT-1_Mam	988	1	1.09006	1	0.453553	0.840101	0
hAT-4b_Ther	155	0	3.47973	1	0.751837	1	0
hAT-N1a_Mam	322	0	1.69217	1	0.555201	1	0
hAT-N1_Mam	142	0	3.82028	1	0.771313	1	0
HERVL74-int	278	0	1.87844	1	0.588715	1	0
Kanga11a	634	1	1.71288	1	0.675116	0.688704	0
Kanga1	675	1	1.60321	1	0.646328	0.712573	0
L1M3a	545	1	1.94472	1	0.72601	0.642254	0
L1M3b	422	0	1.21683	1	0.44098	1	0
L1M3e	291	0	1.80003	1	0.575237	1	0
L1M6B	336	0	1.62181	1	0.541167	1	0
L1MA10	3802	7	1.13779	1	0.594363	0.555262	0
L1MB4	6725	12	1.02232	1	0.495395	0.617428	0
L1MC3	10455	20	1.04859	1	0.556893	0.532875	0
L1MDb	948	1	1.10047	1	0.458679	0.837298	0
L1MEa	282	0	1.86348	1	0.586199	1	0
L1P5	129	0	4.29919	1	0.794072	1	0
L1PB4	500	0	1.05231	1	0.387875	1	0
L2-1_Crp	25	0	21.1525	1	0.955601	1	0
L2-2_Mam	364	0	1.51618	1	0.518431	1	0
L5	503	0	1.07861	1	0.396916	1	0
LTR102_Mam	393	0	1.35556	1	0.479559	1	0
LTR105_Mam	416	0	1.29589	1	0.463556	1	0
LTR106_Mam	447	0	1.20186	1	0.436443	1	0
LTR107_Mam	308	0	1.76008	1	0.567993	1	0
LTR108a_Mam	60	0	8.83647	1	0.894757	1	0
LTR108b_Mam	41	0	12.7822	1	0.92654	1	0
LTR108c_Mam	34	0	15.2381	1	0.938297	1	0
LTR108d_Mam	63	0	8.35459	1	0.888956	1	0
LTR108e_Mam	115	0	4.63313	1	0.807546	1	0
LTR109A2	74	0	7.21394	1	0.872286	1	0
LTR109B	192	0	2.77809	1	0.699282	1	0
LTR10_EC	399	0	1.32389	1	0.471193	1	0
LTR11B_BT	840	1	1.22016	1	0.513358	0.805597	0
LTR11_BT	1963	3	1.09354	1	0.503743	0.707202	0
LTR16A2	1402	2	1.15483	1	0.519774	0.731997	0
LTR16B1	897	1	1.19118	1	0.500745	0.813196	0
LTR16B	558	1	1.92546	1	0.722224	0.645915	0
LTR16D1	175	0	3.06333	1	0.723078	1	0
LTR16D2	207	0	2.59721	1	0.681981	1	0
LTR16E2	1483	2	1.09067	1	0.482159	0.760151	0
LTR18B_BT	435	0	1.21051	1	0.439067	1	0
LTR18C_BT	70	0	7.61244	1	0.878634	1	0
LTR2B_BT	340	0	1.4786	1	0.509945	1	0
LTR2C_BT	181	0	2.76029	1	0.697766	1	0
LTR3_BT	105	0	4.90706	1	0.817379	1	0
LTR45	11	0	45.7484	1	0.98018	1	0
LTR45_BT	174	0	3.03917	1	0.721228	1	0
LTR45C	70	0	7.72709	1	0.880321	1	0
LTR46_BT	183	0	2.83476	1	0.704369	1	0
LTR47_BT	356	0	1.5033	1	0.515552	1	0
LTR4_BT	559	1	1.91121	1	0.719385	0.648643	0
LTR52	809	1	1.32948	1	0.557269	0.777605	0
LTR53B	148	0	3.54425	1	0.75582	1	0
LTR53-int	319	0	1.60109	1	0.53696	1	0
LTR58	3	0	139.513	1	0.994643	1	0
LTR5_BT	936	1	1.1591	1	0.486326	0.82167	0
LTR68	287	0	1.87476	1	0.58806	1	0
LTR69	1	0	277.71	1	0.998203	1	0
LTR6B_BT	364	0	1.4746	1	0.508926	1	0
LTR6_BT	169	0	3.16936	1	0.73101	1	0
LTR71_BT	141	0	3.82933	1	0.771797	1	0
LTR73	1	0	278.56	1	0.998208	1	0
LTR73B_BT	167	0	3.20245	1	0.733396	1	0
LTR75_1	43	0	12.5523	1	0.925166	1	0
LTR75	180	0	2.94975	1	0.714072	1	0
LTR75_BT	706	1	1.50955	1	0.618865	0.733953	0
LTR77	21	0	25.2521	1	0.962938	1	0
LTR78B	1875	3	1.16143	1	0.5494	0.668598	0
LTR7_BT	141	0	3.63049	1	0.760937	1	0
LTR80A	320	0	1.66614	1	0.550135	1	0
LTR80B	342	0	1.56831	1	0.52994	1	0
LTR81	229	0	2.36912	1	0.657182	1	0
LTR81A	506	0	1.07108	1	0.394345	1	0
LTR81AB	153	0	3.55488	1	0.756399	1	0
LTR81C	395	0	1.37086	1	0.483496	1	0
LTR83	527	0	1.02253	1	0.377282	1	0
LTR86A1	328	0	1.64344	1	0.545585	1	0
LTR86A2	248	0	2.18169	1	0.633812	1	0
LTR86B2	174	0	3.09612	1	0.725572	1	0
LTR86C	264	0	2.04363	1	0.614518	1	0
LTR8_BT	373	0	1.42624	1	0.497388	1	0
LTR90A	252	0	2.16501	1	0.631569	1	0
LTR90B	316	0	1.73402	1	0.563157	1	0
LTR9B_EC	383	0	1.37488	1	0.484563	1	0
MADE2	1614	2	1.03891	1	0.44971	0.783182	0
MamGyp-int	436	0	1.22382	1	0.443005	1	0
MamGypLTR1b	702	1	1.55346	1	0.632083	0.72382	0
MamGypLTR1d	424	0	1.28031	1	0.45922	1	0
MamGypLTR3	367	0	1.47933	1	0.510016	1	0
MamGypLTR3a	727	1	1.49632	1	0.614735	0.737054	0
MamGypLTR4	432	0	1.2566	1	0.452515	1	0
MamGypsy2-LTR	512	0	1.07885	1	0.396979	1	0
Mam_R4	410	0	1.32263	1	0.470824	1	0
MamRep1894	297	0	1.86601	1	0.586553	1	0
MamRep488	268	0	2.05261	1	0.615806	1	0
MamRTE2	38	0	14.106	1	0.933318	1	0
MamTip1	459	0	1.19001	1	0.43283	1	0
MamTip1b	264	0	2.07372	1	0.618869	1	0
MamTip2	3091	5	1.07559	1	0.516193	0.654513	0
MARE10	58	0	9.31118	1	0.899896	1	0
MARE4	196	0	2.82581	1	0.703484	1	0
MARE6	113	0	4.7124	1	0.81048	1	0
MARNA	2023	3	1.07947	1	0.493773	0.715325	0
MER102b	1949	3	1.12071	1	0.52249	0.69163	0
MER105	573	1	1.92364	1	0.721846	0.646271	0
MER110-int	346	0	1.52008	1	0.519369	1	0
MER115	1704	3	1.26619	1	0.612139	0.61153	0
MER121B	55	0	9.78153	1	0.904555	1	0
MER125	128	0	4.2891	1	0.793654	1	0
MER126	199	0	2.74538	1	0.696257	1	0
MER127	157	0	3.46253	1	0.750754	1	0
MER132	36	0	14.9796	1	0.937168	1	0
MER133A	38	0	14.3197	1	0.934279	1	0
MER133B	27	0	19.9047	1	0.952752	1	0
MER134	69	0	7.88839	1	0.88264	1	0
MER135	539	0	1.02812	1	0.379259	1	0
MER136	26	0	20.2227	1	0.95354	1	0
MER31_BT	321	0	1.64588	1	0.546103	1	0
MER45C	869	1	1.23775	1	0.520762	0.801035	0
MER45R	573	1	1.88533	1	0.714108	0.653653	0
MER52-int	323	0	1.59956	1	0.536622	1	0
MER53	4934	8	1.00921	1	0.467383	0.666236	0
MER57LA	1149	2	1.41844	1	0.646138	0.624192	0
MER58C	1818	3	1.21421	1	0.582154	0.639416	0
MER5B	19003	34	1.02175	1	0.528458	0.540911	0
MER63D	1914	3	1.14834	1	0.540903	0.675958	0
MER67A	351	0	1.52932	1	0.521407	1	0
MER67B	369	0	1.4442	1	0.501734	1	0
MER68C	117	0	4.57432	1	0.805303	1	0
MER68-int	194	0	2.70019	1	0.692095	1	0
MER70C	291	0	1.82845	1	0.580196	1	0
MER70-int	79	0	6.78891	1	0.864751	1	0
MER74A	1374	2	1.16095	1	0.523219	0.729339	0
MER74B	700	1	1.52879	1	0.624741	0.729486	0
MER74C	208	0	2.56701	1	0.678913	1	0
MER76-int	147	0	3.53497	1	0.755276	1	0
MER77B	1073	2	1.4858	1	0.672023	0.599136	0
MER81	2544	4	1.09416	1	0.519587	0.669253	0
MER83A-int	20	0	26.069	1	0.964159	1	0
MER83B-int	44	0	12.3554	1	0.923981	1	0
MER87A2_BT	151	0	3.50665	1	0.753525	1	0
MER88	144	0	3.69812	1	0.764709	1	0
MER89-int	405	0	1.29203	1	0.462526	1	0
MER91C	990	1	1.12596	1	0.470879	0.830493	0
MER92A	177	0	3.04233	1	0.721446	1	0
MER92C	126	0	4.2008	1	0.789837	1	0
MER92D	182	0	2.96707	1	0.715459	1	0
MER92-int	1033	1	1.01823	1	0.416805	0.859475	0
MER94B	344	0	1.61334	1	0.539397	1	0
MER95	19	0	27.2082	1	0.965718	1	0
MER96	823	1	1.34672	1	0.563694	0.773298	0
MER96B	1630	2	1.00901	1	0.43014	0.796547	0
MER97a	197	0	2.65674	1	0.687922	1	0
MER97b	196	0	2.7121	1	0.693198	1	0
MER97c	185	0	2.83976	1	0.704786	1	0
MER97d	94	0	5.5786	1	0.837622	1	0
MER99	182	0	2.926	1	0.712108	1	0
MERX	247	0	2.19045	1	0.634974	1	0
MLT1A-int	315	0	1.66927	1	0.55077	1	0
MLT1B-int	330	0	1.60057	1	0.536805	1	0
MLT1C2-int	324	0	1.61921	1	0.540683	1	0
MLT1C-int	97	0	5.38839	1	0.832351	1	0
MLT1D-int	424	0	1.22	1	0.441914	1	0
MLT1E1A-int	72	0	7.18583	1	0.871868	1	0
MLT1E1-int	25	0	20.5704	1	0.954374	1	0
MLT1E2-int	106	0	4.91401	1	0.817596	1	0
MLT1E3-int	46	0	11.1882	1	0.916318	1	0
MLT1E-int	20	0	24.8623	1	0.962454	1	0
MLT1F1-int	164	0	3.17418	1	0.731405	1	0
MLT1F2-int	181	0	2.86952	1	0.70738	1	0
MLT1F	3356	6	1.11255	1	0.560009	0.600131	0
MLT1G1-int	273	0	1.91076	1	0.594035	1	0
MLT1G3-int	201	0	2.5934	1	0.681642	1	0
MLT1G-int	148	0	3.55162	1	0.756259	1	0
MLT1H1-int	223	0	2.34658	1	0.654579	1	0
MLT1H2-int	247	0	2.11968	1	0.62543	1	0
MLT1H-int	643	1	1.65367	1	0.660014	0.701428	0
MLT1I-int	510	0	1.04381	1	0.384877	1	0
MLT1-int	224	0	2.37638	1	0.658056	1	0
MLT1J1-int	337	0	1.5701	1	0.530343	1	0
MLT1J2	4591	8	1.06848	1	0.534227	0.604529	0
MLT1J2-int	367	0	1.43594	1	0.499757	1	0
MLT1K-int	84	0	6.39992	1	0.857048	1	0
MLT1L-int	54	0	9.75817	1	0.90437	1	0
MLT1M-int	1	0	277.166	1	0.998199	1	0
MLT1N2-int	24	0	21.7368	1	0.956836	1	0
MLT1O-int	4	0	108.633	1	0.99267	1	0
MLT2B2	962	1	1.11295	1	0.464698	0.833961	0
MLT2B3	127	0	4.16606	1	0.788274	1	0
MLT2E	338	0	1.6062	1	0.537944	1	0
MLT-int	197	0	2.73568	1	0.69538	1	0
Oamar1	26	0	19.5918	1	0.952082	1	0
OldhAT-N1a	11	0	45.5966	1	0.980115	1	0
OldhAT-N1b	10	0	50.275	1	0.982096	1	0
OldhAT-N1c	1	0	279.538	1	0.998215	1	0
Tigger11a	275	0	1.9557	1	0.601168	1	0
Tigger17	71	0	7.3704	1	0.874888	1	0
Tigger17b	68	0	7.62813	1	0.878918	1	0
Tigger17c	311	0	1.72331	1	0.561175	1	0
Tigger1a_Mars	140	0	3.81721	1	0.771175	1	0
Tigger21a	133	0	4.0272	1	0.781764	1	0
Tigger23a	370	0	1.47588	1	0.509204	1	0
Tigger2a	6	0	79.1725	1	0.989242	1	0
Tigger2a_Car	87	0	6.3104	1	0.855118	1	0
Tigger6a	475	0	1.06963	1	0.393915	1	0
Tigger8	645	1	1.68136	1	0.667189	0.695436	0
Tigger9a	753	1	1.44597	1	0.598508	0.748996	0
UCON11	47	0	11.3526	1	0.91744	1	0
UCON15	40	0	13.4099	1	0.929894	1	0
UCON33	98	0	5.50029	1	0.835444	1	0
UCON34	222	0	2.48556	1	0.670264	1	0
UCON35	120	0	4.59257	1	0.805955	1	0
UCON37	124	0	4.40182	1	0.79841	1	0
UCON38	141	0	3.87242	1	0.774023	1	0
UCON39	75	0	7.27228	1	0.87322	1	0
UCON40	157	0	3.45521	1	0.750298	1	0
UCON4	141	0	3.88092	1	0.774457	1	0
UCON44	227	0	2.3952	1	0.660202	1	0
UCON55	203	0	2.71738	1	0.693638	1	0
UCON59	45	0	12.0454	1	0.922066	1	0
UCON73	158	0	3.48712	1	0.752261	1	0
UCON78	153	0	3.56521	1	0.757011	1	0
UCON81	31	0	17.5007	1	0.946197	1	0
UCON86	91	0	5.9937	1	0.848007	1	0
UCON97	39	0	13.8198	1	0.931942	1	0
X11_DNA	159	0	3.41829	1	0.747956	1	0
X12_LINE	190	0	2.90693	1	0.710461	1	0
X13_LINE	103	0	5.25134	1	0.828277	1	0
X15_LINE	181	0	3.05606	1	0.72247	1	0
X1_LINE	64	0	8.2507	1	0.887613	1	0
X1_LR	14	0	36.9065	1	0.97505	1	0
X20_LINE	121	0	4.48182	1	0.801661	1	0
X21_LINE	39	0	13.6781	1	0.931262	1	0
X23_DNA	58	0	9.28363	1	0.899614	1	0
X24_DNA	331	0	1.67337	1	0.551511	1	0
X24_LINE	449	0	1.23098	1	0.445073	1	0
X2a_DNA	264	0	2.09328	1	0.621647	1	0
X2b_DNA	105	0	5.24804	1	0.828148	1	0
X2_LINE	150	0	3.60948	1	0.759628	1	0
X30_DNA	461	0	1.18998	1	0.432816	1	0
X33a_DNA	76	0	7.02353	1	0.869019	1	0
X34_DNA	67	0	8.13846	1	0.886078	1	0
X4a_DNA	121	0	4.5045	1	0.802553	1	0
X4b_DNA	424	0	1.28889	1	0.461604	1	0
X5B_LINE	55	0	9.99275	1	0.906474	1	0
X6A_LINE	950	1	1.16335	1	0.488252	0.820548	0
X7D_LINE	25	0	21.499	1	0.9563	1	0
X9a_DNA	443	0	1.2337	1	0.445882	1	0
Zaphod3	1074	1	1.01207	1	0.413499	0.861149	0
Zaphod4a	273	0	1.96026	1	0.60189	1	0
Zaphod5a	54	0	9.87362	1	0.905433	1	0
Zaphod5b	45	0	11.9543	1	0.921497	1	0
MER77	1065	1	0.998311	0.72882	0.406108	0.864868	-0.000335124
MER45B	1060	1	0.996863	0.728818	0.405328	0.865259	-0.000622715
MLT1H	7093	12	0.989588	0.88934	0.44923	0.660293	-0.000769072
MER63A	2204	3	0.993996	0.804093	0.429675	0.765144	-0.000822771
MER87B_BT	3244	5	0.987345	0.838832	0.434352	0.724825	-0.00140234
Charlie4a	2176	3	0.986268	0.80414	0.423602	0.769658	-0.00188843
MLT1O	2812	4	0.973659	0.824238	0.418043	0.753151	-0.00323289
MLT1G	2205	3	0.97043	0.804398	0.410991	0.778913	-0.00409341
Charlie2a	1639	2	0.974447	0.775626	0.406768	0.812006	-0.00412086
L1MB7	16287	29	0.964541	0.784565	0.39996	0.669909	-0.00548824
L1M3de	3240	5	0.944323	0.840283	0.391753	0.759118	-0.0062461
MER21C	7201	12	0.955469	0.784581	0.399713	0.704747	-0.00692438
MLT1D	15092	26	0.95498	0.774148	0.382562	0.689581	-0.00738853
MamGypLTR2c	560	0	0.972769	0.631717	0.358894	1	-0.00794548
MamGypLTR1c	559	0	0.969729	0.631745	0.357746	1	-0.00884538
L1MC1	14321	25	0.945348	0.770868	0.364125	0.707728	-0.00916399
L1M4	19274	34	0.947259	0.736634	0.355538	0.70626	-0.0103768
MLT1C	5702	9	0.941919	0.757146	0.384844	0.731654	-0.0104299
L1MEg2	558	0	0.955373	0.631932	0.352273	1	-0.0131286
MER92B	558	0	0.955323	0.631933	0.352253	1	-0.0131437
Tigger16a	1175	1	0.932113	0.730105	0.369023	0.882764	-0.0138559
ERV1-3-LTR_BT	2373	3	0.896237	0.808733	0.349639	0.821853	-0.0145711
LTR16E1	1786	2	0.90866	0.77847	0.36013	0.841278	-0.015029
MER58A	10045	16	0.924508	0.722579	0.343596	0.741742	-0.0159801
MER31A	567	0	0.940278	0.632232	0.346414	1	-0.0176901
LTR41C	576	0	0.938898	0.632271	0.345859	1	-0.0181099
LFSINE_Vert	1892	2	0.87679	0.781257	0.336625	0.855267	-0.0203366
Arthur1B	1859	2	0.871502	0.781811	0.332691	0.857563	-0.0212112
Charlie17a	592	0	0.928631	0.632549	0.341803	1	-0.0212478
L1M7	1831	2	0.868822	0.782101	0.330696	0.858723	-0.0216535
MER76	571	0	0.927227	0.632575	0.341283	1	-0.0216799
LTR39B_BT	1820	2	0.866813	0.782325	0.329195	0.859592	-0.0219844
Kanga1a	586	0	0.919261	0.632833	0.338098	1	-0.024134
L1M4b	3445	5	0.898772	0.695822	0.345244	0.794835	-0.024251
Charlie20a	592	0	0.912423	0.633076	0.335356	1	-0.0262526
HAL1	14502	24	0.9092	0.627165	0.294487	0.771046	-0.0278256
MER68	1226	1	0.863212	0.734712	0.328012	0.901175	-0.0284117
MER58B	6091	9	0.89319	0.650383	0.321257	0.784166	-0.0304461
L2	44415	76	0.927287	0.491161	0.249059	0.786712	-0.0336296
Tigger1	5335	8	0.862123	0.637376	0.287249	0.815963	-0.0418662
LTR31B_BT	615	0	0.862042	0.635638	0.314606	1	-0.0421465
MER34-int	622	0	0.858582	0.635874	0.313135	1	-0.043253
ALTR2B1_BT	4908	7	0.865632	0.617313	0.29787	0.813659	-0.0436114
ERVL-int	622	0	0.847704	0.636648	0.30851	1	-0.0467441
LTR39A_BT	622	0	0.847028	0.636698	0.308222	1	-0.0469614
ERV3-16A3_I-int	4261	6	0.855626	0.595893	0.293201	0.824152	-0.0505753
LTR81B	657	0	0.824136	0.638627	0.298274	1	-0.0543448
Charlie2b	2619	3	0.818472	0.644114	0.282394	0.865091	-0.0552089
MLT2C1	1924	2	0.842968	0.594765	0.311162	0.869869	-0.0556126
MamGypLTR1a	665	0	0.816632	0.639339	0.29497	1	-0.0567737
L1ME2	9120	14	0.861581	0.542795	0.25172	0.823397	-0.0570379
L1MEg1	665	0	0.797164	0.641368	0.286319	1	-0.0630858
LTR41B	677	0	0.792099	0.641955	0.284026	1	-0.064726
MER103C	5840	8	0.845995	0.535521	0.267386	0.83104	-0.0654405
L1M	706	0	0.784931	0.642831	0.28075	1	-0.0670436
LTR84b	692	0	0.779247	0.643528	0.278181	1	-0.0688866
LTR18A_BT	676	0	0.77907	0.643537	0.27812	1	-0.068947
Plat_L3	2036	2	0.807317	0.597419	0.283807	0.884919	-0.0690833
L4_C_Mam	3249	4	0.835249	0.539467	0.288149	0.847068	-0.0696144
CR1-3_Croc	711	0	0.774256	0.644188	0.275877	1	-0.0704968
LTR16D	714	0	0.759692	0.646199	0.269156	1	-0.0751923
MER31-int	2054	2	0.775457	0.602163	0.259083	0.897969	-0.0808189
Tigger22N1	747	0	0.730072	0.650934	0.255185	1	-0.0846335
MER63C	722	0	0.725287	0.651757	0.252926	1	-0.0861484
X17_LINE	766	0	0.720765	0.652613	0.250711	1	-0.0875564
LTR33C	758	0	0.712374	0.654187	0.246673	1	-0.0901757
MLT1N2	3474	4	0.788066	0.544277	0.242867	0.876476	-0.0907752
HAL1b	2713	3	0.788712	0.501902	0.256317	0.88081	-0.102517
L1ME3F	2716	3	0.776105	0.503046	0.245286	0.887286	-0.109115
MLT1F1	2761	3	0.774666	0.503223	0.24402	0.888021	-0.109858
MamRep137	1439	1	0.756772	0.531459	0.26024	0.928609	-0.11038
LTR32_BT	1446	1	0.742621	0.533128	0.250921	0.932105	-0.117272
ERVL-E-int	5269	7	0.798829	0.42596	0.220607	0.869947	-0.1201
MLT2F	1455	1	0.73271	0.534558	0.244358	0.934527	-0.122045
Mariner1_BT	8287	11	0.798806	0.361296	0.185511	0.88137	-0.143289
MER91A	2243	2	0.73853	0.452333	0.230223	0.912533	-0.150658
L1ME4c	6269	8	0.774929	0.372756	0.183838	0.891275	-0.157657
Charlie5	2341	2	0.693247	0.459993	0.195016	0.929342	-0.178255
MLT1J	10243	14	0.789714	0.29562	0.152692	0.899813	-0.180267
ALTR2B_BT	2948	3	0.725374	0.390508	0.201283	0.912068	-0.189158
MLT1K	11666	16	0.787281	0.274266	0.137169	0.908684	-0.193859
MER121	782	0	0.695323	0.412351	0.23834	1	-0.201694
MamRep4096	814	0	0.67044	0.413148	0.225976	1	-0.221438
MLT1E	799	0	0.670325	0.413144	0.225932	1	-0.221535
Charlie9	827	0	0.663941	0.413526	0.222704	1	-0.226598
LTR10B_BT	3764	4	0.714361	0.34022	0.174386	0.917659	-0.227226
Charlie23a	855	0	0.639934	0.415575	0.2105	1	-0.245592
ERV3-16A3_LTR	844	0	0.63856	0.415717	0.209805	1	-0.246679
HERVL40-int	827	0	0.637126	0.415864	0.209085	1	-0.247814
MamRep1527	852	0	0.633927	0.416256	0.207422	1	-0.250312
Tigger20a	863	0	0.62643	0.417223	0.203551	1	-0.256166
MLT1E3	1641	1	0.650865	0.384228	0.189499	0.953506	-0.257376
LTR10A_BT	1629	1	0.644674	0.385108	0.185347	0.954852	-0.262475
LTR82B	869	0	0.618041	0.418446	0.199203	1	-0.262668
Tigger16b	893	0	0.61748	0.418551	0.198894	1	-0.263087
L1MA9	46448	73	0.829539	0.105592	0.052071	0.959331	-0.263246
ALTR39_BT	2349	2	0.671971	0.340395	0.178694	0.936773	-0.268421
BLACKJACK	1711	1	0.616148	0.391191	0.166241	0.960876	-0.284778
LTR16A	3149	3	0.682245	0.300965	0.165042	0.931205	-0.287671
L1MCb	1695	1	0.611277	0.392566	0.163005	0.96187	-0.288363
HAL1M8	1729	1	0.608536	0.393406	0.161174	0.962428	-0.290331
LTR82A	928	0	0.576334	0.427092	0.177247	1	-0.293744
LTR91	949	0	0.573033	0.42799	0.175478	1	-0.296073
MER67D	940	0	0.570424	0.428701	0.174096	1	-0.297915
LTR37-int	944	0	0.558046	0.432393	0.167483	1	-0.306424
MLT2D	3287	3	0.655627	0.303478	0.143571	0.94198	-0.315412
L1MD1	4565	5	0.676754	0.236198	0.125492	0.939732	-0.353031
L1MD3	4727	5	0.67663	0.236219	0.125375	0.939797	-0.353175
MLT1C2	13169	17	0.727706	0.150749	0.0692375	0.956472	-0.37683
L1MC4	17797	24	0.73941	0.112496	0.0518684	0.965791	-0.41328
MLT1H2	3483	3	0.624453	0.231097	0.119617	0.953483	-0.432196
MLT1H1	2668	2	0.601054	0.255935	0.126383	0.958991	-0.43469
L4_A_Mam	4208	4	0.639437	0.207558	0.111672	0.951672	-0.440531
Tigger17a	1813	1	0.576919	0.27595	0.140349	0.968602	-0.443734
ERVL-B4-int	2641	2	0.589271	0.258097	0.118174	0.96225	-0.448808
MamSINE1	3612	3	0.610473	0.233055	0.109373	0.958228	-0.45037
MLT1J1	3597	3	0.605225	0.234202	0.105623	0.959938	-0.456704
MLT1E1A	2783	2	0.575977	0.261811	0.109097	0.965775	-0.463233
LTR39C_BT	2817	2	0.574722	0.262238	0.108251	0.9661	-0.464498
LTR1_BT	3520	3	0.597565	0.236303	0.100246	0.962364	-0.465408
LTR50	2007	1	0.538193	0.28495	0.115557	0.975516	-0.487331
L1M3c	1913	1	0.538114	0.284941	0.115527	0.975525	-0.487459
MER119	986	0	0.54519	0.273109	0.16056	1	-0.4933
Charlie29b	1012	0	0.538092	0.27325	0.156725	1	-0.503756
LTR33B	1015	0	0.535023	0.273357	0.155068	1	-0.508255
L1MD	8674	10	0.667968	0.132693	0.0644558	0.964845	-0.510633
LTR40b	1012	0	0.529795	0.273605	0.152249	1	-0.515872
MLT1E1	1034	0	0.519446	0.274388	0.146644	1	-0.530718
Cheshire	1027	0	0.517004	0.274623	0.145326	1	-0.534184
LTR16B2	1076	0	0.496676	0.277548	0.134292	1	-0.562019
MLT2C2	1091	0	0.494485	0.277973	0.133098	1	-0.564894
L1M8	1100	0	0.476544	0.282225	0.123381	1	-0.587488
MER21B	1128	0	0.475733	0.282474	0.12293	1	-0.588427
L1MEb	1111	0	0.473359	0.283153	0.121655	1	-0.591265
Charlie7	2828	2	0.567094	0.189305	0.103176	0.968032	-0.591527
LTR78	2866	2	0.562161	0.189583	0.0999367	0.969251	-0.600109
MLT1M	1203	0	0.453861	0.290065	0.111113	1	-0.612583
MamTip2b	3890	3	0.565644	0.17922	0.079066	0.971608	-0.61374
L1M2	9462	11	0.657848	0.0963106	0.0508442	0.972226	-0.614038
MER63B	2067	1	0.528596	0.196855	0.109586	0.977109	-0.649216
MER46C	2202	1	0.492721	0.202378	0.0880804	0.982603	-0.708518
L1M5	35493	48	0.727042	0.0186598	0.0099262	0.993232	-0.795193
L1_Art	61925	87	0.759538	0.00944727	0.00472597	0.996562	-0.80341
MLT2B4	3197	2	0.502631	0.143056	0.0641485	0.981977	-0.8381
L1ME3A	11053	12	0.618813	0.0580816	0.025632	0.986551	-0.855809
MLT1I	7424	7	0.583667	0.074616	0.038157	0.982539	-0.875563
MER89	1227	0	0.436065	0.182878	0.101594	1	-0.883476
MLT1J-int	1233	0	0.434016	0.183032	0.100504	1	-0.888048
MamRep434	1261	0	0.432522	0.183169	0.0997016	1	-0.891326
LTR33A_	1245	0	0.431376	0.183267	0.099099	1	-0.893865
L1ME3	6560	6	0.563597	0.0825904	0.0371194	0.984015	-0.895986
MER67C	1260	0	0.423532	0.184197	0.0949499	1	-0.910649
L1MCc	2220	1	0.474019	0.140762	0.0774795	0.985166	-0.917067
L3	33484	43	0.704733	0.0146233	0.007287	0.995197	-0.92638
MER34B-int	1326	0	0.402098	0.188795	0.0837548	1	-0.951624
LTR91A	1389	0	0.391037	0.192523	0.0780775	1	-0.969256
L1MC	8201	8	0.579473	0.0537461	0.029289	0.986351	-0.999455
MER34A	5230	4	0.51818	0.0723937	0.0373995	0.986393	-1.08155
MLT1G1	2553	1	0.417193	0.101945	0.0485291	0.991631	-1.25066
HERV16-int	1381	0	0.381324	0.122508	0.0731793	1	-1.26828
LTR39D_BT	1403	0	0.375229	0.122653	0.0701381	1	-1.28875
LTR37B	1492	0	0.361976	0.123927	0.063632	1	-1.32945
LTR37A	1541	0	0.350614	0.126186	0.0582013	1	-1.35931
Charlie15a	1597	0	0.3448	0.127828	0.0554732	1	-1.37238
Charlie18a	1607	0	0.339575	0.129589	0.0530631	1	-1.38279
LTR16C	4655	3	0.461969	0.0567713	0.027541	0.99165	-1.38807
LTR40a	1580	0	0.336031	0.130942	0.0514526	1	-1.38913
L1MEf	7902	7	0.518381	0.0277206	0.0145942	0.993972	-1.47609
ERV1-2C-LTR_BT	2667	1	0.395771	0.071412	0.0391633	0.993535	-1.53281
MLT1L	7677	6	0.492617	0.0300146	0.0130118	0.995012	-1.55535
MamGypsy2-I	1633	0	0.32872	0.0826393	0.0481669	1	-1.73799
L1MEh	1756	0	0.301455	0.0870664	0.0366232	1	-1.83404
MLT1A0	11455	10	0.512339	0.0110118	0.00515906	0.997765	-1.88927
L1MB1	5913	4	0.4425	0.0234266	0.0127336	0.995956	-1.91763
L1M6	3063	1	0.348434	0.0530673	0.0220224	0.996735	-1.93959
L1MEd	10517	9	0.496966	0.00896998	0.00498119	0.997933	-2.06519
ERV2-1-I_BT	1712	0	0.290963	0.0558594	0.0325205	1	-2.23154
Arthur1	1967	0	0.26909	0.0591887	0.0246156	1	-2.32518
MLT1E2	3319	1	0.318636	0.0254178	0.013943	0.998085	-2.63155
L1M3	16123	15	0.508198	0.0018432	0.00101103	0.999543	-2.67027
L1MC4a	7814	5	0.403657	0.00777942	0.00324145	0.998999	-2.76033
MLT1F2	4584	2	0.34627	0.0154283	0.00838337	0.998285	-2.77192
L1M4a1	2024	0	0.254373	0.0382945	0.0198757	1	-2.79828
L1M4a2	2129	0	0.240223	0.0411156	0.0157854	1	-2.85175
L1MC2	4818	2	0.324454	0.0113748	0.00528059	0.99898	-3.15698
LTR16	2277	0	0.235319	0.025754	0.0144758	1	-3.31706
LTR79	2365	0	0.229913	0.0261645	0.0131046	1	-3.35578
L1-2_BT	111037	148	0.668535	1.52161e-06	8.12541e-07	0.999999	-3.37964
L1M4c	4692	2	0.317904	0.00799942	0.00453514	0.99914	-3.46695
L1ME3B	5002	2	0.315433	0.00803505	0.00427211	0.999195	-3.48734
MLT2B1	2876	0	0.184395	0.00811743	0.0045058	1	-5.0992
MLT1B	14952	10	0.390036	0.000155596	8.87029e-05	0.99997	-5.17249
L1MEi	3195	0	0.16541	0.00591161	0.00242749	1	-5.78439
LTR33	6346	2	0.253511	0.00107596	0.000635237	0.999902	-5.87669
BTLTR1J	22110	15	0.396182	1.37616e-05	5.88194e-06	0.999998	-6.4936
ERV1-2-I_BT	3170	0	0.153545	0.00255577	0.00152743	1	-7.00815
L1MEc	13196	7	0.309147	2.99067e-05	1.44126e-05	0.999996	-7.6624
MLT1A	7995	2	0.199996	0.000103256	4.30781e-05	0.999995	-9.25552
L1MDa	5337	0	0.0950741	5.78452e-05	2.88276e-05	1	-14.3863
Bov-tA1	216595	258	0.540502	1.50254e-19	8.547e-20	1	-16.708
L1MEg	8935	1	0.115694	1.07573e-06	6.53861e-07	1	-18.5711
L1MCa	6970	0	0.0729452	2.8584e-06	1.2331e-06	1	-20.9395
ERV2-1-LTR_BT	8097	0	0.0641804	4.14297e-07	1.94806e-07	1	-25.2864
Bov-tA2	537541	870	0.393561	3.80764e-26	3.34316e-26	1	-34.1977
L1-3_BT	58431	29	0.233467	4.70821e-24	2.88848e-24	1	-48.9569
Bov-tA3	345315	385	0.407057	2.59655e-47	1.48553e-47	1	-60.4075
BTLTR1	82729	22	0.135985	1.04573e-41	4.84617e-42	1	-117.962
L1_BT	88749	25	0.118821	3.37159e-55	1.87412e-55	1	-167.4

## Sheet: IFNG-inducible STAT1
TE family	TE family size	Number of overlaps	Odds ratio	Fisher's two tail	Fisher's left tail	Fisher's right tail	Combo score
MER41_BT	5491	35	33.7586	2.78333e-39	1	2.78333e-39	195.753
MER95	19	1	492.077	0.00406867	0.999992	0.00406867	21.378
ORSL-2b	554	3	33.6955	0.000261094	0.999992	0.000261094	18.1829
EuthAT-N1	48	1	197.638	0.0100994	0.99995	0.0100994	15.2207
LTR45B_BT	104	1	84.626	0.0234268	0.999727	0.0234268	10.4388
Zaphod2	542	2	25.6589	0.00639132	0.999754	0.00639132	10.2729
MER105	573	2	25.3944	0.00651932	0.999746	0.00651932	10.1999
UCON58	123	1	77.8552	0.0254382	0.999677	0.0254382	10.0179
MLT1H-int	643	2	20.689	0.00964587	0.99954	0.00964587	8.81002
LTR73B_BT	167	1	54.4481	0.0361733	0.999344	0.0361733	8.31351
ERV2-2B_BT-LTR	168	1	50.2707	0.0391192	0.999232	0.0391192	7.95532
Tigger6b	186	1	49.6095	0.0396304	0.999211	0.0396304	7.89667
UCON55	203	1	48.3205	0.040666	0.999168	0.040666	7.78074
LTR109B	192	1	46.9641	0.0418151	0.999121	0.0418151	7.65641
UCON44	227	1	41.5903	0.0470887	0.998882	0.0470887	7.13728
Charlie10a	231	1	41.3461	0.0473601	0.998869	0.0473601	7.11261
LTR81	229	1	40.9977	0.0477528	0.99885	0.0477528	7.07723
Penelope1_Vert	975	2	15.3252	0.0169894	0.998911	0.0169894	6.96926
EUTREP16	245	1	39.4624	0.0495638	0.99876	0.0495638	6.91877
Tigger13a	2208	3	8.22998	0.0135635	0.998395	0.0135635	5.67925
LTR72_BT	1151	2	11.863	0.0272996	0.997751	0.0272996	5.58041
MER31_BT	321	1	27.3174	0.0707999	0.997448	0.0707999	5.48736
BTLTR1C	251	1	27.0787	0.0713987	0.997406	0.0713987	5.45539
MER81	2544	3	7.82161	0.0155052	0.998072	0.0155052	5.3697
MER113	2460	3	7.58218	0.0168196	0.997844	0.0168196	5.18525
MIRb	166108	62	2.0136	7.88519e-06	0.999998	4.64843e-06	5.15307
MIR1_Amn	9606	7	4.16289	0.00386637	0.999101	0.00386637	4.96433
X6b_DNA	527	1	18.3586	0.103502	0.994476	0.103502	4.13562
L2b	65106	28	2.20025	0.000467121	0.999831	0.000381662	3.78908
MER92B	558	1	16.0226	0.117666	0.992823	0.117666	3.71928
ERV54-EC_LTR	1816	2	7.57663	0.0609301	0.992237	0.0609301	3.55018
BTLTR1D2	538	1	15.0059	0.125115	0.991864	0.125115	3.52723
Kanga1c	651	1	14.4729	0.129413	0.991279	0.129413	3.42357
MamGypLTR1b	702	1	13.388	0.139132	0.989883	0.139132	3.20604
SINE2-2_BT	46989	20	2.25712	0.00254451	0.999173	0.00193004	3.04707
ERVL-E-int	5269	4	4.12623	0.0354739	0.991795	0.0354739	2.96518
LTR33C	758	1	12.171	0.151929	0.987877	0.151929	2.9505
X12_DNA	856	1	11.2023	0.163925	0.985822	0.163925	2.73753
Chap1a_Mam	903	1	10.613	0.172194	0.984305	0.172194	2.60346
L4_A_Mam	4208	3	4.37003	0.0661884	0.985613	0.0661884	2.50895
MER91C	990	1	10.0535	0.180852	0.982629	0.180852	2.47284
LTR41	921	1	9.75947	0.185757	0.981641	0.185757	2.40284
MER45A	2712	2	5.35205	0.109802	0.980493	0.109802	2.32181
MER5C	1021	1	9.2126	0.195626	0.979558	0.195626	2.26999
L1MC5a	13194	7	2.73925	0.0308078	0.98934	0.0308078	2.19715
L1MD2	8184	5	3.12971	0.0465584	0.985936	0.0465584	2.19252
LTR39C_BT	2817	2	4.91619	0.126072	0.975731	0.126072	2.06637
MER92-int	1033	1	8.33529	0.213838	0.975401	0.213838	2.04943
MER94	3024	2	4.88737	0.12727	0.975364	0.12727	2.04933
MER77	1065	1	8.29821	0.214683	0.975198	0.214683	2.03989
MER90a	1089	1	8.22129	0.216456	0.974768	0.216456	2.02005
MER113A	1181	1	8.088	0.2196	0.973996	0.2196	1.9855
MER57LA	1149	1	8.08067	0.219775	0.973953	0.219775	1.98359
MamRep38	1240	1	7.68592	0.229653	0.971446	0.229653	1.87987
MER34A	5230	3	3.59361	0.103307	0.973026	0.103307	1.81936
ERV1-1-I_BT	2389	2	4.49398	0.145483	0.969533	0.145483	1.81502
L1ME3B	5002	3	3.50635	0.109047	0.970871	0.109047	1.74189
L4_C_Mam	3249	2	4.3036	0.155701	0.966044	0.155701	1.70066
MLT2B4	3197	2	4.25847	0.15828	0.965141	0.15828	1.67347
MIR3	62466	22	1.85346	0.0142322	0.994591	0.0104634	1.64399
LTR91A	1389	1	6.74552	0.257157	0.963797	0.257157	1.62427
MLT1J	10243	5	2.7165	0.0749454	0.974188	0.0749454	1.62234
MLT1N2	3474	2	4.11911	0.166649	0.962143	0.166649	1.58934
MamRep137	1439	1	6.52569	0.264555	0.961567	0.264555	1.56275
LTR39D_BT	1403	1	6.18461	0.276905	0.957682	0.276905	1.46594
Charlie15a	1597	1	6.07829	0.280995	0.956345	0.280995	1.4354
ERV1-3-I_BT	3480	2	3.80444	0.188112	0.954005	0.188112	1.3987
Charlie18a	1607	1	5.90303	0.287998	0.954008	0.287998	1.38475
ALTR2C_BT	3588	2	3.62508	0.202201	0.948313	0.202201	1.28986
MIRc	76415	25	1.7025	0.0265386	0.99074	0.016496	1.20992
MER102c	1830	1	5.19991	0.319942	0.942462	0.319942	1.17718
AmnSINE1	1905	1	5.14646	0.322659	0.941411	0.322659	1.16112
L3b	6997	3	2.75873	0.180179	0.940057	0.180179	1.08965
ERV1-1B-LTR_BT	4192	2	3.20505	0.241863	0.930826	0.241863	1.03582
L1ME3	6560	3	2.68763	0.189741	0.935376	0.189741	1.02958
L1ME3C	1942	1	4.53225	0.357465	0.926983	0.357465	0.974054
CHRL1_BT	18852	7	2.07241	0.118918	0.955696	0.0991698	0.972204
LTR39_BT	2013	1	4.4393	0.363384	0.924344	0.363384	0.945359
MER102a	2152	1	4.40099	0.365882	0.923212	0.365882	0.933502
L4_B_Mam	2122	1	4.37311	0.367719	0.922376	0.367719	0.924869
MER63A	2204	1	4.30576	0.372234	0.920294	0.372234	0.903975
L1M3c	1913	1	4.29105	0.373229	0.919836	0.373229	0.899421
MIR	133102	39	1.49358	0.0362608	0.986439	0.0211533	0.833758
L1M4	19274	8	1.99035	0.147472	0.957504	0.0911816	0.825492
MER21C	7201	3	2.42802	0.230609	0.914011	0.230609	0.815379
L2a	117287	36	1.49211	0.0391951	0.983219	0.0262139	0.812198
LTR79	2365	1	3.98398	0.395384	0.909113	0.395384	0.803629
L1ME4b	15805	6	2.02527	0.169318	0.936958	0.139268	0.785271
Tigger19b	2496	1	3.87716	0.403702	0.90488	0.403702	0.770151
L1M4a2	2129	1	3.81441	0.408742	0.902265	0.408742	0.750471
L1MB5	7339	3	2.3441	0.246144	0.905328	0.246144	0.748249
BTLTR1B	1609	1	3.76287	0.412965	0.900049	0.412965	0.73431
LTR67B	2506	1	3.76243	0.41302	0.900001	0.41302	0.734133
MLT1G3	2427	1	3.68855	0.419243	0.896663	0.419243	0.710916
Tigger1a_Art	5245	2	2.61837	0.31892	0.890732	0.31892	0.689221
MLT1G1	2553	1	3.49534	0.436414	0.887099	0.436414	0.650138
MLT1O	2812	1	3.37127	0.448174	0.880246	0.448174	0.611117
MLT1F1	2761	1	3.24589	0.460688	0.872682	0.460688	0.571741
ERVL-B4-int	2641	1	3.16396	0.469231	0.867354	0.469231	0.546067
MamTip2	3091	1	3.15492	0.470198	0.866736	0.470198	0.543228
Tigger15a	2999	1	3.13519	0.472308	0.865396	0.472308	0.537057
Charlie8	3102	1	2.99671	0.487652	0.855385	0.487652	0.49384
L1MB1	5913	2	2.18606	0.399809	0.839853	0.399809	0.449244
OldhAT1	3541	1	2.78753	0.512703	0.838044	0.512703	0.429105
MER21C_BT	3303	1	2.67722	0.526904	0.827652	0.526904	0.395347
MamTip2b	3890	1	2.48486	0.553507	0.807016	0.553507	0.337321
L1M3de	3240	1	2.46242	0.556763	0.804391	0.556763	0.330649
LTR1_BT	3520	1	2.45269	0.558193	0.803224	0.558193	0.327754
L2c	78346	21	1.33454	0.258898	0.882436	0.17012	0.244341
L1MB8	12388	4	1.73518	0.542893	0.833942	0.32845	0.210925
MLT1H	7093	2	1.93336	0.671081	0.795521	0.460491	0.164757
MER5A	27050	7	1.44072	0.516137	0.801311	0.325751	0.151313
L1ME4a	15591	4	1.47759	0.586449	0.746579	0.440037	0.130542
MER3	8459	2	1.70474	0.697121	0.74123	0.52613	0.120583
L1MC	8201	2	1.60764	0.711228	0.712815	0.55749	0.101365
L1ME3A	11053	3	1.58318	0.744348	0.75151	0.464492	0.08499
MER5A1	12394	3	1.56707	0.745767	0.74593	0.471081	0.082562
CHRL	28742	7	1.33155	0.676893	0.741565	0.398097	0.0700125
L2d	16765	4	1.42601	0.783614	0.723763	0.466529	0.0542177
MLT1C2	13169	3	1.36117	0.771035	0.66096	0.564045	0.050235
SINE2-1_BT	34074	7	1.1483	0.849076	0.603636	0.547064	0.014175
Bov-tA2	537541	114	1.0272	0.90627	0.586345	0.459927	0.00165462
ALTR2B_BT	2948	0	1.51504	1	0.517339	1	0
ALTR39_BT	2349	0	1.83066	1	0.579563	1	0
AmnHarb1	97	0	47.5005	1	0.979381	1	0
AmnL2-1	1372	0	3.6005	1	0.757762	1	0
AmnSINE2	534	0	9.18404	1	0.897043	1	0
ARLTR2	15	0	299.047	1	0.99687	1	0
Arthur1	1967	0	2.22973	1	0.638978	1	0
Arthur1A	784	0	6.13552	1	0.84983	1	0
Arthur1B	1859	0	2.45968	1	0.66629	1	0
Arthur1C	557	0	8.58033	1	0.890205	1	0
Arthur2	753	0	5.99892	1	0.846697	1	0
BLACKJACK	1711	0	2.52649	1	0.673492	1	0
BtERV3B_LTR	1242	0	3.60076	1	0.757795	1	0
BtERVF1_I-int	268	0	12.7496	1	0.924852	1	0
BtERVF1_LTR	364	0	11.7883	1	0.918902	1	0
BtERVF2_I-int	424	0	8.22093	1	0.885756	1	0
BtERVF2_LTR	232	0	18.3815	1	0.947283	1	0
BTLTR1B1	852	0	3.62033	1	0.759019	1	0
BTLTR1C1	36	0	94.3361	1	0.989741	1	0
BTLTR1D	38	0	104.866	1	0.990753	1	0
BTLTR1E	123	0	33.1726	1	0.970545	1	0
BTLTR1E1	92	0	42.6875	1	0.977096	1	0
BTLTR1E2	66	0	63.7872	1	0.984678	1	0
BTLTR1E3	36	0	117.05	1	0.991723	1	0
BTLTR1F	415	0	8.70715	1	0.89178	1	0
BTLTR1J1	48	0	89.8113	1	0.989153	1	0
BTLTR1J2	31	0	130.706	1	0.992617	1	0
BTLTR1J3	41	0	105.337	1	0.990777	1	0
BTLTR1J4	148	0	29.1021	1	0.96645	1	0
Chap1_Mam	231	0	20.1355	1	0.951762	1	0
Charlie10	1009	0	4.45902	1	0.799365	1	0
Charlie10b	197	0	24.0964	1	0.959557	1	0
Charlie11	106	0	40.5664	1	0.975879	1	0
Charlie1	1469	0	2.94044	1	0.712034	1	0
Charlie12	3	0	1257.82	1	0.999404	1	0
Charlie13a	436	0	10.1239	1	0.906174	1	0
Charlie13b	278	0	16.7531	1	0.942269	1	0
Charlie14a	320	0	14.6048	1	0.934034	1	0
Charlie15b	1327	0	3.52136	1	0.753062	1	0
Charlie16	971	0	4.71433	1	0.809121	1	0
Charlie16a	749	0	6.33833	1	0.854274	1	0
Charlie17	432	0	10.4821	1	0.909232	1	0
Charlie17a	592	0	8.11622	1	0.884294	1	0
Charlie17b	379	0	11.67	1	0.918106	1	0
Charlie19a	1086	0	4.3627	1	0.79541	1	0
Charlie1a	4591	1	1.84391	1	0.704797	0.662474	0
Charlie1b	2525	0	1.82189	1	0.578033	1	0
Charlie20a	592	0	7.76262	1	0.879356	1	0
Charlie21a	477	0	9.30973	1	0.898382	1	0
Charlie22a	673	0	7.0313	1	0.867653	1	0
Charlie23a	855	0	5.55281	1	0.83543	1	0
Charlie24	982	0	4.70197	1	0.808669	1	0
Charlie25	814	0	5.26233	1	0.827193	1	0
Charlie26a	338	0	14.0206	1	0.931371	1	0
Charlie29a	609	0	7.28808	1	0.872023	1	0
Charlie29b	1012	0	4.63656	1	0.806245	1	0
Charlie2a	1639	0	2.69064	1	0.689927	1	0
Charlie2b	2619	0	1.71303	1	0.55826	1	0
Charlie30a	295	0	16.1217	1	0.940065	1	0
Charlie30b	396	0	11.9308	1	0.919812	1	0
Charlie31a	467	0	9.98085	1	0.904882	1	0
Charlie32a	156	0	30.7819	1	0.968241	1	0
Charlie4	870	0	5.40666	1	0.831378	1	0
Charlie4a	2176	0	2.06352	1	0.616339	1	0
Charlie4z	3595	0	1.35174	1	0.477766	1	0
Charlie5	2341	0	1.96579	1	0.601688	1	0
Charlie6	215	0	18.9402	1	0.948814	1	0
Charlie7	2828	0	1.5834	1	0.53226	1	0
Charlie7a	810	0	5.88614	1	0.843988	1	0
Charlie7b_Mars	59	0	76.3747	1	0.987209	1	0
Charlie9	827	0	5.79253	1	0.841674	1	0
Cheshire	1027	0	4.29161	1	0.792412	1	0
Chompy-6_Croc	143	0	34.6418	1	0.971745	1	0
CHR-1	132	0	37.0714	1	0.973587	1	0
CHR-2	14174	3	1.25918	1	0.607973	0.616064	0
CR1-11_Crp	36	0	131.299	1	0.992618	1	0
CR1-12_AMi	102	0	45.2022	1	0.978333	1	0
CR1-13_AMi	69	0	67.7908	1	0.985567	1	0
CR1-16_AMi	250	0	18.5577	1	0.947753	1	0
CR1-1_Amn	43	0	108.257	1	0.991014	1	0
CR1-3_Croc	711	0	6.7814	1	0.863117	1	0
CR1-L3A_Croc	173	0	28.0412	1	0.96517	1	0
CR1-L3B_Croc	31	0	154.667	1	0.993757	1	0
CR1_Mam	1062	0	4.36581	1	0.795544	1	0
DNA1_Mam	135	0	34.6957	1	0.971799	1	0
ERV1-1C-LTR_BT	2945	0	1.40125	1	0.490413	1	0
ERV1-1-LTR_BT	2348	0	1.83055	1	0.579545	1	0
ERV1-2C-LTR_BT	2667	0	1.63154	1	0.542254	1	0
ERV1-2-I_BT	3170	0	1.14592	1	0.418511	1	0
ERV1-2-LTR_BT	866	0	5.07313	1	0.821351	1	0
ERV1-3-LTR_BT	2373	0	1.85255	1	0.583306	1	0
ERV2-1B-LTR_BT	524	0	5.93039	1	0.84516	1	0
ERV2-1C-LTR_BT	221	0	14.5015	1	0.933672	1	0
ERV2-1-I_BT	1712	0	2.22274	1	0.638106	1	0
ERV2-2B_BT-I	290	0	10.0053	1	0.905226	1	0
ERV2-2-I_BT	153	0	20.5567	1	0.95283	1	0
ERV2-2-LTR_BT	87	0	48.0882	1	0.979654	1	0
ERV2-3-I_BT	196	0	16.8412	1	0.942648	1	0
ERV2-3-LTR_BT	209	0	19.4678	1	0.950172	1	0
ERV3-16A3_LTR	844	0	5.41543	1	0.831633	1	0
ERVL-int	622	0	6.96348	1	0.866471	1	0
Eulor11	82	0	57.3357	1	0.982919	1	0
Eulor1	65	0	72.0472	1	0.986425	1	0
Eulor6A	24	0	192.292	1	0.995021	1	0
Eulor6B	58	0	80.4324	1	0.987854	1	0
Eulor6C	18	0	257.927	1	0.996334	1	0
Eulor6D	57	0	82.1148	1	0.988105	1	0
Eulor6E	24	0	191.999	1	0.995013	1	0
Eulor9A	93	0	51.0806	1	0.98082	1	0
Eulor9B	27	0	175.625	1	0.994525	1	0
Eulor9C	93	0	52.6136	1	0.981374	1	0
EuthAT-2	949	0	4.68305	1	0.807983	1	0
EuthAT-N1a	38	0	123.715	1	0.992156	1	0
Eutr11	440	0	10.3036	1	0.90773	1	0
Eutr2	25	0	180.852	1	0.994698	1	0
Eutr2B	41	0	111.456	1	0.991281	1	0
EUTREP7	202	0	22.6838	1	0.957089	1	0
EUTREP8	166	0	28.6867	1	0.965948	1	0
EutTc1-N1	42	0	109.316	1	0.991106	1	0
EutTc1-N2	123	0	37.6704	1	0.974015	1	0
FordPrefect	485	0	8.65407	1	0.891117	1	0
FordPrefect_a	192	0	24.0474	1	0.959482	1	0
HAL1	14502	3	1.19379	1	0.569642	0.65131	0
HAL1b	2713	0	1.64718	1	0.545409	1	0
HAL1M8	1729	0	2.48858	1	0.669449	1	0
hAT-1_Mam	988	0	4.59529	1	0.804693	1	0
hAT-4b_Ther	155	0	29.7027	1	0.967107	1	0
hAT-5_Mam	665	0	6.97687	1	0.866696	1	0
hAT-N1a_Mam	322	0	14.6045	1	0.934031	1	0
hAT-N1_Mam	142	0	32.9244	1	0.970295	1	0
HERV16-int	1381	0	3.13141	1	0.726938	1	0
HERVL40-int	827	0	5.22941	1	0.826203	1	0
HERVL74-int	278	0	15.2474	1	0.936753	1	0
Kanga11a	634	0	7.29741	1	0.872167	1	0
Kanga1	675	0	6.79612	1	0.863402	1	0
Kanga1a	586	0	7.78917	1	0.879744	1	0
Kanga1b	296	0	15.2584	1	0.936783	1	0
Kanga1d	494	0	9.52949	1	0.900598	1	0
Kanga2_a	1176	0	3.84238	1	0.771131	1	0
L1M3a	545	0	7.99118	1	0.882612	1	0
L1M3b	422	0	9.64368	1	0.901748	1	0
L1M3d	709	0	5.89473	1	0.844223	1	0
L1M3e	291	0	14.6707	1	0.934341	1	0
L1M4a1	2024	0	2.02927	1	0.611342	1	0
L1M4b	3445	0	1.1871	1	0.431318	1	0
L1M4c	4692	1	1.6281	1	0.652644	0.707645	0
L1M6	3063	0	1.46145	1	0.504995	1	0
L1M6B	336	0	13.997	1	0.931261	1	0
L1M	706	0	6.94747	1	0.86616	1	0
L1M7	1831	0	2.38766	1	0.658188	1	0
L1M8	1100	0	3.88549	1	0.773369	1	0
L1MA10	3802	0	1.19812	1	0.434648	1	0
L1MB2	6384	1	1.35055	1	0.564727	0.772803	0
L1MB7	16287	3	1.03963	1	0.46494	0.738809	0
L1MC5	11002	2	1.2061	1	0.547633	0.710486	0
L1MCb	1695	0	2.44732	1	0.664943	1	0
L1MCc	2220	0	1.94254	1	0.598053	1	0
L1MD3	4727	1	1.8858	1	0.713618	0.654247	0
L1MDb	948	0	4.43332	1	0.798341	1	0
L1ME2z	5477	1	1.60881	1	0.647354	0.711921	0
L1ME3D	2424	0	1.78528	1	0.571586	1	0
L1ME3E	2474	0	1.75349	1	0.56582	1	0
L1ME3F	2716	0	1.58661	1	0.532945	1	0
L1ME3G	11085	2	1.22576	1	0.557884	0.702176	0
L1ME5	1906	0	2.32834	1	0.651211	1	0
L1MEa	282	0	15.2583	1	0.936794	1	0
L1MEb	1111	0	3.87713	1	0.772939	1	0
L1MEg1	665	0	6.5985	1	0.859617	1	0
L1MEg2	558	0	7.97244	1	0.882348	1	0
L1MEh	1756	0	2.49662	1	0.670312	1	0
L1MEi	3195	0	1.37326	1	0.483338	1	0
L1MEj	1505	0	2.90917	1	0.709436	1	0
L1P5	129	0	38.4057	1	0.974497	1	0
L1PB4	500	0	8.61953	1	0.890698	1	0
L2-1_AMi	394	0	11.9426	1	0.919889	1	0
L2-1_Crp	25	0	184.11	1	0.994792	1	0
L2-2_Mam	364	0	13.3436	1	0.928003	1	0
L5	503	0	9.23863	1	0.897631	1	0
LFSINE_Vert	1892	0	2.56618	1	0.677602	1	0
Looper	437	0	9.83052	1	0.903514	1	0
LTR101_Mam	673	0	6.7329	1	0.862213	1	0
LTR102_Mam	393	0	11.3063	1	0.915578	1	0
LTR104_Mam	1045	0	4.50651	1	0.801246	1	0
LTR105_Mam	416	0	10.9974	1	0.913301	1	0
LTR106_Mam	447	0	10.1457	1	0.906361	1	0
LTR107_Mam	308	0	15.0753	1	0.936033	1	0
LTR108a_Mam	60	0	74.6114	1	0.986905	1	0
LTR108b_Mam	41	0	107.28	1	0.990943	1	0
LTR108c_Mam	34	0	126.674	1	0.992362	1	0
LTR108d_Mam	63	0	69.7144	1	0.985981	1	0
LTR108e_Mam	115	0	38.9589	1	0.974878	1	0
LTR109A1	169	0	26.1863	1	0.962755	1	0
LTR109A2	74	0	61.2545	1	0.984024	1	0
LTR10A_BT	1629	0	2.62841	1	0.683895	1	0
LTR10B_BT	3764	0	1.20446	1	0.436558	1	0
LTR10_EC	399	0	10.9082	1	0.912634	1	0
LTR11B_BT	840	0	4.7979	1	0.812141	1	0
LTR11_BT	1963	0	2.28629	1	0.646092	1	0
LTR13B_BT	1512	0	2.97483	1	0.714828	1	0
LTR13_BT	924	0	4.95016	1	0.817333	1	0
LTR16	2277	0	1.98675	1	0.604924	1	0
LTR16A1	2048	0	2.23133	1	0.639176	1	0
LTR16A2	1402	0	3.24882	1	0.735356	1	0
LTR16A	3149	0	1.4359	1	0.498896	1	0
LTR16B1	897	0	4.9617	1	0.817723	1	0
LTR16B2	1076	0	4.1622	1	0.786694	1	0
LTR16B	558	0	8.06974	1	0.88368	1	0
LTR16D1	175	0	25.8849	1	0.962322	1	0
LTR16D2	207	0	22.0138	1	0.955807	1	0
LTR16D	714	0	6.50414	1	0.857719	1	0
LTR16E1	1786	0	2.57015	1	0.678018	1	0
LTR16E2	1483	0	3.06509	1	0.721928	1	0
LTR18A_BT	676	0	6.38915	1	0.855365	1	0
LTR18B_BT	435	0	9.92823	1	0.904418	1	0
LTR18C_BT	70	0	64.5371	1	0.984841	1	0
LTR2B_BT	340	0	11.4061	1	0.916318	1	0
LTR2_BT	331	0	11.1678	1	0.914618	1	0
LTR2C_BT	181	0	21.1846	1	0.954149	1	0
LTR31B_BT	615	0	7.13631	1	0.869485	1	0
LTR32_BT	1446	0	3.12337	1	0.726333	1	0
LTR33A_	1245	0	3.64274	1	0.760219	1	0
LTR33A	1606	0	2.84762	1	0.704183	1	0
LTR33B	1015	0	4.59083	1	0.804518	1	0
LTR37A	1541	0	2.9898	1	0.716026	1	0
LTR37B	1492	0	3.08428	1	0.723391	1	0
LTR37-int	944	0	4.57995	1	0.804117	1	0
LTR39A_BT	622	0	6.95011	1	0.866232	1	0
LTR39B_BT	1820	0	2.35426	1	0.654298	1	0
LTR39C2_BT	1004	0	4.43962	1	0.798585	1	0
LTR3_BT	105	0	39.3977	1	0.975175	1	0
LTR40A1	404	0	11.3506	1	0.915887	1	0
LTR40a	1580	0	2.79328	1	0.699401	1	0
LTR40b	1012	0	4.46013	1	0.799409	1	0
LTR40c	435	0	10.2197	1	0.907012	1	0
LTR41B	677	0	6.66683	1	0.860947	1	0
LTR41C	576	0	8.00238	1	0.882755	1	0
LTR45	11	0	397.067	1	0.997694	1	0
LTR45_BT	174	0	25.1763	1	0.961283	1	0
LTR45C	70	0	67.013	1	0.985397	1	0
LTR46_BT	183	0	22.8524	1	0.95742	1	0
LTR47_BT	356	0	12.6254	1	0.924073	1	0
LTR4_BT	559	0	7.94455	1	0.88196	1	0
LTR50	2007	0	2.28843	1	0.646351	1	0
LTR52	809	0	5.58886	1	0.83641	1	0
LTR52-int	156	0	27.2354	1	0.964181	1	0
LTR53	365	0	11.9367	1	0.919867	1	0
LTR53B	148	0	29.0631	1	0.966406	1	0
LTR53-int	319	0	12.6077	1	0.923995	1	0
LTR58	3	0	1242.68	1	0.999397	1	0
LTR5_BT	936	0	4.93893	1	0.816956	1	0
LTR65	341	0	13.2053	1	0.92729	1	0
LTR68	287	0	15.8823	1	0.939196	1	0
LTR69	1	0	2454.88	1	0.999796	1	0
LTR6B_BT	364	0	12.4374	1	0.922966	1	0
LTR6_BT	169	0	26.7543	1	0.963531	1	0
LTR71_BT	141	0	32.7695	1	0.970158	1	0
LTR73	1	0	2474.49	1	0.999798	1	0
LTR73_BT	335	0	13.468	1	0.92866	1	0
LTR75_1	43	0	109.991	1	0.991155	1	0
LTR75	180	0	24.5716	1	0.960342	1	0
LTR75B	150	0	28.7094	1	0.965996	1	0
LTR75_BT	706	0	6.25833	1	0.852568	1	0
LTR77	21	0	223.318	1	0.995735	1	0
LTR78	2866	0	1.58048	1	0.531639	1	0
LTR78B	1875	0	2.4794	1	0.668441	1	0
LTR7_BT	141	0	28.8049	1	0.966121	1	0
LTR80A	320	0	13.9211	1	0.930909	1	0
LTR80B	342	0	13.2159	1	0.927346	1	0
LTR81A	506	0	9.15957	1	0.896794	1	0
LTR81AB	153	0	30.7375	1	0.968199	1	0
LTR81B	657	0	7.0368	1	0.867754	1	0
LTR81C	395	0	11.7125	1	0.918381	1	0
LTR82A	928	0	4.83368	1	0.813371	1	0
LTR82B	869	0	5.21478	1	0.825751	1	0
LTR83	527	0	8.66932	1	0.89128	1	0
LTR84a	470	0	9.84514	1	0.903635	1	0
LTR84b	692	0	6.61284	1	0.859891	1	0
LTR86A1	328	0	13.954	1	0.931061	1	0
LTR86A2	248	0	18.6499	1	0.948006	1	0
LTR86B1	214	0	21.6409	1	0.955056	1	0
LTR86B2	174	0	26.3555	1	0.962983	1	0
LTR86C	264	0	17.3897	1	0.944333	1	0
LTR8_BT	373	0	11.8732	1	0.919452	1	0
LTR90A	252	0	18.7423	1	0.948253	1	0
LTR90B	316	0	15.0973	1	0.936118	1	0
LTR91	949	0	4.92675	1	0.816545	1	0
LTR9A_EC	422	0	10.3894	1	0.908465	1	0
LTR9B_EC	383	0	11.2794	1	0.915391	1	0
LTR9_BT	435	0	10.0422	1	0.905449	1	0
MADE2	1614	0	3.08911	1	0.723744	1	0
MamGyp-int	436	0	10.229	1	0.907092	1	0
MamGypLTR1a	665	0	7.00395	1	0.867175	1	0
MamGypLTR1c	559	0	8.29459	1	0.886646	1	0
MamGypLTR1d	424	0	10.9787	1	0.913156	1	0
MamGypLTR2b	512	0	9.25681	1	0.897818	1	0
MamGypLTR2c	560	0	8.38299	1	0.887771	1	0
MamGypLTR3	367	0	12.6921	1	0.924449	1	0
MamGypLTR3a	727	0	6.39477	1	0.855467	1	0
MamGypLTR4	432	0	10.7752	1	0.911587	1	0
MamGypsy2-I	1633	0	2.77699	1	0.69793	1	0
MamGypsy2-LTR	512	0	9.50113	1	0.900309	1	0
Mam_R4	410	0	11.3243	1	0.915698	1	0
MamRep1527	852	0	5.39351	1	0.831008	1	0
MamRep1879	811	0	5.94458	1	0.845395	1	0
MamRep1894	297	0	16.5442	1	0.941548	1	0
MamRep4096	814	0	5.79417	1	0.841718	1	0
MamRep434	1261	0	3.73823	1	0.765556	1	0
MamRep488	268	0	17.9935	1	0.946146	1	0
MamRTE1	6660	1	1.44416	1	0.597442	0.749954	0
MamRTE2	38	0	122.843	1	0.992101	1	0
MamSINE1	3612	0	1.33915	1	0.474465	1	0
MamTip1	459	0	10.2997	1	0.907689	1	0
MamTip1b	264	0	18.0437	1	0.946295	1	0
MamTip3	695	0	6.75986	1	0.862717	1	0
MamTip3B	540	0	8.76876	1	0.892438	1	0
MARE10	58	0	80.9156	1	0.987926	1	0
MARE4	196	0	25.089	1	0.961126	1	0
MARE6	113	0	39.6002	1	0.975283	1	0
MARE8	138	0	35.0277	1	0.972059	1	0
Mariner1_BT	8287	1	1.16929	1	0.490699	0.819325	0
MARNA	2023	0	2.316	1	0.649715	1	0
MER102b	1949	0	2.40439	1	0.660094	1	0
MER103C	5840	1	1.63571	1	0.654675	0.70598	0
MER104	1415	0	3.39494	1	0.745143	1	0
MER106A	489	0	9.59528	1	0.901246	1	0
MER106B	679	0	6.9739	1	0.866639	1	0
MER110	530	0	8.64024	1	0.890933	1	0
MER110A	500	0	9.1479	1	0.896672	1	0
MER110-int	346	0	12.4529	1	0.923068	1	0
MER112	2787	0	1.70654	1	0.557016	1	0
MER115	1704	0	2.6634	1	0.687308	1	0
MER117	2617	0	1.84472	1	0.581959	1	0
MER119	986	0	4.60718	1	0.805144	1	0
MER121	782	0	5.97543	1	0.846135	1	0
MER121B	55	0	84.6209	1	0.988462	1	0
MER125	128	0	37.702	1	0.974029	1	0
MER126	199	0	23.851	1	0.959148	1	0
MER127	157	0	29.9082	1	0.967327	1	0
MER130	134	0	34.479	1	0.971626	1	0
MER132	36	0	131.987	1	0.992656	1	0
MER133A	38	0	127.718	1	0.992401	1	0
MER133B	27	0	176.941	1	0.994566	1	0
MER134	69	0	69.1066	1	0.985839	1	0
MER135	539	0	9.1004	1	0.896146	1	0
MER136	26	0	174.07	1	0.994484	1	0
MER20	13677	2	1.03661	1	0.448371	0.784507	0
MER20B	2830	0	1.61985	1	0.539859	1	0
MER21B	1128	0	4.01129	1	0.77962	1	0
MER21-int	490	0	8.87109	1	0.89363	1	0
MER31A	567	0	7.84725	1	0.880585	1	0
MER31B	1176	0	3.80888	1	0.769371	1	0
MER31-int	2054	0	2.13698	1	0.626679	1	0
MER33	7547	1	1.23484	1	0.519213	0.802192	0
MER34A1	3423	0	1.37488	1	0.483741	1	0
MER34B-int	1326	0	3.36045	1	0.74291	1	0
MER34-int	622	0	7.18279	1	0.87027	1	0
MER45B	1060	0	4.08997	1	0.783373	1	0
MER45C	869	0	5.20523	1	0.82546	1	0
MER45R	573	0	7.96633	1	0.882258	1	0
MER46C	2202	0	2.11071	1	0.623036	1	0
MER4B-int	350	0	13.1056	1	0.926753	1	0
MER52-int	323	0	12.7891	1	0.925028	1	0
MER53	4934	1	1.96735	1	0.72974	0.638717	0
MER58C	1818	0	2.64585	1	0.68559	1	0
MER58D	935	0	5.17633	1	0.824563	1	0
MER5C1	416	0	11.4447	1	0.916544	1	0
MER63B	2067	0	2.28749	1	0.646231	1	0
MER63C	722	0	5.90112	1	0.844374	1	0
MER63D	1914	0	2.48688	1	0.669248	1	0
MER67A	351	0	12.9016	1	0.925639	1	0
MER67B	369	0	12.0532	1	0.920608	1	0
MER67C	1260	0	3.54346	1	0.754404	1	0
MER67D	940	0	4.80204	1	0.812263	1	0
MER68	1226	0	3.55186	1	0.754912	1	0
MER68B	372	0	11.8908	1	0.919567	1	0
MER68C	117	0	38.7108	1	0.974715	1	0
MER68-int	194	0	22.054	1	0.9559	1	0
MER70C	291	0	15.2374	1	0.936703	1	0
MER70-int	79	0	57.9778	1	0.983114	1	0
MER74A	1374	0	3.1956	1	0.731607	1	0
MER74B	700	0	6.37588	1	0.85508	1	0
MER74C	208	0	21.5375	1	0.954851	1	0
MER76	571	0	7.66143	1	0.877873	1	0
MER76-int	147	0	28.6118	1	0.965887	1	0
MER77B	1073	0	4.07936	1	0.782873	1	0
MER83A-int	20	0	225.295	1	0.995782	1	0
MER83B-int	44	0	109.416	1	0.991105	1	0
MER87A2_BT	151	0	29.1372	1	0.966486	1	0
MER87B_BT	3244	0	1.36524	1	0.48128	1	0
MER87_BT	1874	0	2.36299	1	0.655319	1	0
MER88	144	0	30.9967	1	0.968474	1	0
MER89	1227	0	3.66194	1	0.761315	1	0
MER89-int	405	0	10.5056	1	0.909439	1	0
MER90	520	0	8.5279	1	0.889583	1	0
MER91A	2243	0	2.16015	1	0.629811	1	0
MER91B	1047	0	4.68555	1	0.808056	1	0
MER92A	177	0	25.8774	1	0.962309	1	0
MER92C	126	0	34.9483	1	0.972015	1	0
MER92D	182	0	25.3386	1	0.961517	1	0
MER94B	344	0	14.3285	1	0.932791	1	0
MER96	823	0	5.92763	1	0.844987	1	0
MER96B	1630	0	2.91016	1	0.709504	1	0
MER97a	197	0	21.6703	1	0.955133	1	0
MER97b	196	0	22.6167	1	0.956971	1	0
MER97c	185	0	23.2958	1	0.958211	1	0
MER97d	94	0	45.966	1	0.978707	1	0
MER99	182	0	24.477	1	0.96019	1	0
MERX	247	0	18.7242	1	0.948208	1	0
MLT1A0-int	325	0	13.1095	1	0.92679	1	0
MLT1A	7995	1	1.13774	1	0.476223	0.827675	0
MLT1A-int	315	0	13.6742	1	0.92971	1	0
MLT1B-int	330	0	13.193	1	0.927233	1	0
MLT1C2-int	324	0	13.2209	1	0.927384	1	0
MLT1C	5702	1	1.58097	1	0.639535	0.718155	0
MLT1C-int	97	0	44.1736	1	0.977846	1	0
MLT1D-int	424	0	9.76411	1	0.902898	1	0
MLT1E1	1034	0	4.38467	1	0.796332	1	0
MLT1E1A	2783	0	1.60674	1	0.537156	1	0
MLT1E1A-int	72	0	58.3599	1	0.983244	1	0
MLT1E1-int	25	0	171.689	1	0.994416	1	0
MLT1E2	3319	0	1.3203	1	0.469459	1	0
MLT1E2-int	106	0	40.0445	1	0.975568	1	0
MLT1E3	1641	0	2.71821	1	0.692527	1	0
MLT1E3-int	46	0	91.1647	1	0.989323	1	0
MLT1E	799	0	5.63232	1	0.837566	1	0
MLT1E-int	20	0	200.582	1	0.995264	1	0
MLT1F1-int	164	0	25.7314	1	0.962116	1	0
MLT1F2-int	181	0	23.1723	1	0.957998	1	0
MLT1F	3356	0	1.31373	1	0.467688	1	0
MLT1F-int	401	0	10.8046	1	0.911833	1	0
MLT1G1-int	273	0	15.4877	1	0.937707	1	0
MLT1G	2205	0	2.02199	1	0.610246	1	0
MLT1G3-int	201	0	21.0331	1	0.953802	1	0
MLT1G-int	148	0	29.2091	1	0.966571	1	0
MLT1H1	2668	0	1.67693	1	0.551302	1	0
MLT1H1-int	223	0	19.1219	1	0.949279	1	0
MLT1H2	3483	0	1.34044	1	0.474809	1	0
MLT1H2-int	247	0	17.2766	1	0.943993	1	0
MLT1I-int	510	0	8.69316	1	0.891568	1	0
MLT1-int	224	0	19.8406	1	0.951069	1	0
MLT1J1	3597	0	1.30162	1	0.464386	1	0
MLT1J1-int	337	0	12.9737	1	0.926044	1	0
MLT1J2	4591	0	1.01273	1	0.373231	1	0
MLT1J2-int	367	0	11.7945	1	0.918941	1	0
MLT1J-int	1233	0	3.6457	1	0.76039	1	0
MLT1K-int	84	0	54.7906	1	0.982127	1	0
MLT1L	7677	1	1.21088	1	0.509033	0.808417	0
MLT1L-int	54	0	81.8694	1	0.988081	1	0
MLT1M	1203	0	3.92848	1	0.775529	1	0
MLT1M-int	1	0	2442.43	1	0.999795	1	0
MLT1N2-int	24	0	185.754	1	0.994846	1	0
MLT1O-int	4	0	927.601	1	0.999138	1	0
MLT2B1	2876	0	1.53679	1	0.522186	1	0
MLT2B2	962	0	4.65092	1	0.806791	1	0
MLT2B3	127	0	34.6363	1	0.971765	1	0
MLT2C1	1924	0	2.38368	1	0.65772	1	0
MLT2C2	1091	0	4.20193	1	0.788477	1	0
MLT2D	3287	0	1.38698	1	0.486818	1	0
MLT2E	338	0	13.7832	1	0.930231	1	0
MLT2F	1455	0	3.04954	1	0.720734	1	0
MLT-int	197	0	23.2792	1	0.958168	1	0
Oamar1	26	0	160.966	1	0.994036	1	0
OldhAT-N1a	11	0	393.724	1	0.997675	1	0
OldhAT-N1b	10	0	441.391	1	0.997943	1	0
OldhAT-N1c	1	0	2497.29	1	0.9998	1	0
ORSL-2a	249	0	18.6595	1	0.948032	1	0
ORSL	937	0	5.08318	1	0.821654	1	0
Plat_L3	2036	0	2.33077	1	0.65149	1	0
SINE2-3_BT	21456	4	1.11045	1	0.532331	0.658743	0
Tigger10	1003	0	4.61854	1	0.80557	1	0
Tigger11a	275	0	16.56	1	0.941618	1	0
Tigger12	596	0	7.79604	1	0.87984	1	0
Tigger12A	454	0	10.5245	1	0.90957	1	0
Tigger12c	518	0	9.14635	1	0.896648	1	0
Tigger14a	788	0	6.10312	1	0.849096	1	0
Tigger16a	1175	0	4.03379	1	0.780695	1	0
Tigger16b	893	0	5.42363	1	0.831853	1	0
Tigger17	71	0	60.8391	1	0.983924	1	0
Tigger17a	1813	0	2.34076	1	0.652702	1	0
Tigger17b	68	0	62.243	1	0.984294	1	0
Tigger17c	311	0	14.5104	1	0.933625	1	0
Tigger17d	386	0	11.9631	1	0.920025	1	0
Tigger18a	979	0	4.56016	1	0.803349	1	0
Tigger19a	2337	0	2.04977	1	0.614331	1	0
Tigger1a_Mars	140	0	32.1698	1	0.969612	1	0
Tigger20a	863	0	5.33723	1	0.829386	1	0
Tigger21a	133	0	34.0711	1	0.971293	1	0
Tigger22N1	747	0	6.30242	1	0.853508	1	0
Tigger23a	370	0	12.7751	1	0.92492	1	0
Tigger2	908	0	5.19585	1	0.825166	1	0
Tigger2a	6	0	697.443	1	0.998772	1	0
Tigger2a_Art	6323	1	1.50499	1	0.616946	0.735577	0
Tigger2a_Car	87	0	55.7834	1	0.982436	1	0
Tigger2f	1514	0	2.8285	1	0.702527	1	0
Tigger6	224	0	20.3224	1	0.952201	1	0
Tigger6a	475	0	8.3586	1	0.887499	1	0
Tigger8	645	0	7.14887	1	0.869689	1	0
Tigger9a	753	0	6.18905	1	0.851035	1	0
Tigger9b	665	0	6.7112	1	0.861803	1	0
UCON11	47	0	97.4298	1	0.990002	1	0
UCON15	40	0	116.673	1	0.991674	1	0
UCON29	183	0	25.6194	1	0.961929	1	0
UCON33	98	0	47.1613	1	0.979232	1	0
UCON34	222	0	21.9179	1	0.955603	1	0
UCON35	120	0	40.6479	1	0.9759	1	0
UCON37	124	0	38.3561	1	0.974472	1	0
UCON38	141	0	33.7122	1	0.97098	1	0
UCON39	75	0	63.8024	1	0.984654	1	0
UCON40	157	0	29.7484	1	0.967154	1	0
UCON4	141	0	33.9022	1	0.97114	1	0
UCON59	45	0	106.089	1	0.990822	1	0
UCON73	158	0	30.7577	1	0.968213	1	0
UCON78	153	0	30.9654	1	0.96843	1	0
UCON80	32	0	146.204	1	0.99339	1	0
UCON81	31	0	156.794	1	0.993841	1	0
UCON8	160	0	29.3836	1	0.96675	1	0
UCON86	91	0	52.3976	1	0.981302	1	0
UCON97	39	0	121.264	1	0.991993	1	0
X10b_DNA	146	0	33.2562	1	0.970581	1	0
X11_DNA	159	0	29.5134	1	0.966895	1	0
X12_LINE	190	0	25.7002	1	0.962039	1	0
X13_LINE	103	0	45.2309	1	0.978345	1	0
X15_LINE	181	0	27.0939	1	0.963965	1	0
X17_LINE	766	0	6.34231	1	0.854354	1	0
X1_DNA	471	0	9.81625	1	0.903365	1	0
X1_LINE	64	0	69.1484	1	0.985864	1	0
X1_LR	14	0	324.558	1	0.997129	1	0
X20_LINE	121	0	38.675	1	0.974685	1	0
X21_LINE	39	0	118.11	1	0.99178	1	0
X23_DNA	58	0	80.3074	1	0.987835	1	0
X24_DNA	331	0	14.8164	1	0.934938	1	0
X24_LINE	449	0	10.8536	1	0.91219	1	0
X26_DNA	587	0	7.92708	1	0.881706	1	0
X2a_DNA	264	0	18.4849	1	0.947542	1	0
X2b_DNA	105	0	46.526	1	0.978937	1	0
X2_LINE	150	0	30.9983	1	0.968467	1	0
X30_DNA	461	0	10.3686	1	0.908272	1	0
X32_DNA	235	0	20.0555	1	0.951571	1	0
X33a_DNA	76	0	59.5997	1	0.983578	1	0
X34_DNA	67	0	71.5469	1	0.986325	1	0
X4a_DNA	121	0	39.1749	1	0.975004	1	0
X4b_DNA	424	0	11.1659	1	0.914548	1	0
X5a_DNA	249	0	19.5228	1	0.950271	1	0
X5B_LINE	55	0	89.4245	1	0.989078	1	0
X6a_DNA	607	0	7.85328	1	0.880657	1	0
X6A_LINE	950	0	5.1007	1	0.822206	1	0
X7A_LINE	599	0	8.08818	1	0.883915	1	0
X7B_LINE	568	0	8.52999	1	0.889591	1	0
X7C_LINE	398	0	12.1945	1	0.921475	1	0
X7D_LINE	25	0	192.025	1	0.995006	1	0
X8_LINE	169	0	28.5984	1	0.965841	1	0
X9a_DNA	443	0	10.688	1	0.910895	1	0
X9b_DNA	403	0	11.645	1	0.917924	1	0
X9_LINE	538	0	9.13822	1	0.896553	1	0
Zaphod	1823	0	2.43883	1	0.663986	1	0
Zaphod3	1074	0	4.32751	1	0.793934	1	0
Zaphod4a	273	0	16.4779	1	0.941338	1	0
Zaphod5a	54	0	84.2986	1	0.988422	1	0
Zaphod5b	45	0	104.039	1	0.990642	1	0
L1_Art	61925	12	0.993555	0.8877	0.45641	0.655169	-0.000482589
CHR-2_BT	23727	4	0.986114	0.823146	0.429788	0.744617	-0.00170517
ERV3-16A3_I-int	4261	0	0.981379	0.631531	0.361693	1	-0.00541272
LTR16C	4655	0	0.979622	0.631545	0.361024	1	-0.00592868
L1MB3	13491	2	0.9611	0.775298	0.397823	0.818154	-0.006327
Bov-A2	362131	74	0.964627	0.742958	0.383729	0.665719	-0.00670435
HAL1ME	4723	0	0.966904	0.63166	0.356225	1	-0.00968759
MLT1F2	4584	0	0.959113	0.631762	0.353259	1	-0.0120121
MER58A	10045	1	0.935202	0.729545	0.370859	0.882096	-0.0132359
MLT1B	14952	2	0.908856	0.777767	0.360706	0.841285	-0.0150493
L2d2	31234	5	0.920031	0.693178	0.368276	0.7781	-0.0191376
CHR-2A	30203	5	0.903773	0.69352	0.351696	0.7907	-0.0232002
L1M2	9462	1	0.885056	0.732356	0.341407	0.895498	-0.0238305
L1MD1	4565	0	0.895375	0.633659	0.328085	1	-0.0315913
ALTR2B1_BT	4908	0	0.892443	0.6338	0.326879	1	-0.0325131
L1MC2	4818	0	0.880448	0.634411	0.321949	1	-0.0363026
L1MEd	10517	1	0.817937	0.739454	0.300015	0.913115	-0.0380076
L3	33484	5	0.834087	0.568152	0.279789	0.842766	-0.0642639
L1MA9	46448	8	0.830138	0.532176	0.251006	0.84407	-0.073575
MER58B	6091	0	0.762665	0.645599	0.270334	1	-0.0742814
L1MDa	5337	0	0.75239	0.647096	0.265571	1	-0.0775876
Tigger1	5335	0	0.749332	0.647563	0.264141	1	-0.0785676
L1ME4c	6269	0	0.729206	0.650885	0.254618	1	-0.0849679
MER5B	19003	2	0.765023	0.602642	0.251737	0.902025	-0.0849905
LTR33	6346	0	0.720744	0.652402	0.250569	1	-0.0876308
MLT1A0	11455	1	0.790032	0.528201	0.282211	0.920272	-0.0942529
CHR-2B	34444	5	0.785721	0.460091	0.230294	0.876176	-0.117301
L1MC4	17797	2	0.732938	0.450909	0.226756	0.9145	-0.15505
L1M5	35493	5	0.749891	0.368756	0.194713	0.898945	-0.17991
L1MB4	6725	0	0.641042	0.414971	0.211047	1	-0.245045
MLT1I	7424	0	0.625672	0.416824	0.203146	1	-0.25711
BTLTR1J	22110	2	0.676056	0.33804	0.182797	0.935148	-0.266032
L1MCa	6970	0	0.582043	0.425017	0.180336	1	-0.290142
L2	44415	6	0.703372	0.25703	0.137313	0.92923	-0.299517
L1MC4a	7814	0	0.556249	0.432287	0.166597	1	-0.308208
MLT1D	15092	1	0.584884	0.273565	0.146183	0.967005	-0.43559
L1ME1	20665	2	0.602525	0.25309	0.128505	0.958305	-0.43615
L1MC1	14321	1	0.58088	0.273869	0.143569	0.967767	-0.440792
ERV2-1-LTR_BT	8097	0	0.529485	0.272946	0.152209	1	-0.517308
L1MEf	7902	0	0.51452	0.274146	0.144126	1	-0.538808
L1MD	8674	0	0.498664	0.276357	0.135538	1	-0.560687
L1ME3Cz	9262	0	0.477366	0.281047	0.12401	1	-0.588059
L1MEg	8935	0	0.473919	0.282008	0.12215	1	-0.592226
L1ME2	9120	0	0.464211	0.285063	0.116913	1	-0.603461
Bov-tA1	216595	32	0.678321	0.0252209	0.0117604	0.992682	-0.89495
L1MC3	10455	0	0.397808	0.188874	0.0818229	1	-0.962588
MLT1K	11666	0	0.392945	0.190497	0.0793328	1	-0.970422
Bov-tA3	345315	51	0.69011	0.00977147	0.00501536	0.996749	-1.07557
L1MEc	13196	0	0.311162	0.0834362	0.040895	1	-1.81672
L1-2_BT	111037	12	0.494806	0.00465891	0.00215095	0.999078	-2.36684
L1-3_BT	58431	6	0.436864	0.00875904	0.00465687	0.9984	-2.45824
L1M3	16123	0	0.255072	0.0374192	0.020335	1	-2.81247
BTLTR1	82729	1	0.113408	1.01888e-06	6.2833e-07	1	-18.8169
L1_BT	88749	3	0.14542	2.0278e-08	1.10114e-08	1	-21.3996
BovB	562047	51	0.228457	2.06027e-29	1.63136e-29	1	-61.1016

## Sheet: IFNG-inducible pSTAT1
TE family	TE family size	Number of overlaps	Odds ratio	Fisher's two tail	Fisher's left tail	Fisher's right tail	Combo score
MER41_BT	5491	23	23.8265	3.85896e-23	1	3.85896e-23	102.531
MER95	19	1	551.66	0.00362882	0.999994	0.00362882	22.2248
UCON44	227	2	70.6329	0.000887876	0.999988	0.000887876	18.744
Tigger13a	2208	4	11.4673	0.00109341	0.999906	0.00109341	10.4219
MamRep137	1439	3	14.7596	0.0027565	0.999816	0.0027565	9.94058
hAT-4b_Ther	155	1	67.1486	0.0294241	0.999567	0.0294241	9.29388
LTR73B_BT	167	1	60.6153	0.0325431	0.999469	0.0325431	8.80864
ERV2-2B_BT-LTR	168	1	54.9909	0.0358108	0.999357	0.0358108	8.35942
UCON55	203	1	54.8693	0.0358894	0.999353	0.0358894	8.3493
LTR109B	192	1	52.176	0.0377062	0.999286	0.0377062	8.12201
L1MB3	13491	11	4.35619	0.000160105	0.999964	0.000160105	8.0583
LTR39_BT	2013	3	9.9143	0.00823555	0.999187	0.00823555	6.89804
LTR72_BT	1151	2	13.1964	0.0224166	0.998336	0.0224166	6.13929
LTR102_Mam	393	1	25.2139	0.0764507	0.997016	0.0764507	5.19914
L5	503	1	20.8214	0.0918147	0.99567	0.0918147	4.54244
MER135	539	1	20.804	0.0918886	0.995662	0.0918886	4.53966
L2b	65106	26	2.28626	0.000388562	0.999856	0.000338895	4.06874
MER45R	573	1	17.8675	0.106158	0.99418	0.106158	4.05132
MIRb	166108	54	1.93078	5.99337e-05	0.999981	3.83133e-05	4.00776
MIR	133102	45	1.98659	9.86411e-05	0.99996	8.09399e-05	3.96707
Kanga1c	651	1	16.261	0.116012	0.993024	0.116012	3.76382
BTLTR1D2	538	1	16.2541	0.116056	0.99302	0.116056	3.7626
MER21C	7201	5	4.04007	0.0183434	0.995645	0.0183434	3.49802
L1MB5	7339	5	3.88591	0.0212438	0.994766	0.0212438	3.2757
MER96	823	1	13.5208	0.137826	0.990071	0.137826	3.23363
SINE2-2_BT	46989	18	2.30254	0.00278949	0.998908	0.0026043	3.07361
X12_DNA	856	1	12.6456	0.146628	0.988726	0.146628	3.05212
Chap1a_Mam	903	1	11.9786	0.154127	0.987507	0.154127	2.90933
MER113	2460	2	6.33897	0.0827272	0.987489	0.0827272	2.88365
Penelope1_Vert	975	1	11.5909	0.158849	0.986705	0.158849	2.82446
MIR1_Amn	9606	5	3.52617	0.0304029	0.991788	0.0304029	2.75822
MER94	3024	2	5.55421	0.103221	0.982294	0.103221	2.43953
MamTip2	3091	2	5.38727	0.108548	0.980833	0.108548	2.34301
MLT2C2	1091	1	9.42638	0.191595	0.980415	0.191595	2.32271
MER77	1065	1	9.17666	0.196258	0.979414	0.196258	2.26152
MER92-int	1033	1	9.16101	0.196557	0.979349	0.196557	2.25766
MER113A	1181	1	9.12156	0.197319	0.97918	0.197319	2.2479
MER90a	1089	1	9.12026	0.197343	0.979176	0.197343	2.24759
MER45B	1060	1	9.05123	0.198686	0.978881	0.198686	2.2305
MER57LA	1149	1	9.04623	0.198786	0.978858	0.198786	2.22925
MER21B	1128	1	8.96902	0.200312	0.97852	0.200312	2.21006
MamRep38	1240	1	8.66314	0.206598	0.977093	0.206598	2.13331
MLT1J	10243	5	3.03456	0.0516542	0.983939	0.0516542	2.06094
L4_C_Mam	3249	2	4.81991	0.130057	0.974491	0.130057	2.01003
ERV1-1-I_BT	2389	2	4.74981	0.13315	0.973525	0.13315	1.96837
MLT2B4	3197	2	4.7374	0.133704	0.973347	0.133704	1.96102
LTR91A	1389	1	7.56977	0.23267	0.970644	0.23267	1.84928
L1MB8	12388	6	2.68555	0.0507688	0.982203	0.0507688	1.84481
MER21C_BT	3303	2	4.45881	0.147197	0.968941	0.147197	1.79456
L1MC5a	13194	6	2.64864	0.0535484	0.980987	0.0535484	1.78643
MamTip2b	3890	2	4.23377	0.159616	0.964651	0.159616	1.65915
L2c	78346	25	1.79966	0.0114389	0.995274	0.00885898	1.64596
LTR39D_BT	1403	1	6.81033	0.254989	0.964425	0.254989	1.64258
Charlie1	1469	1	6.50041	0.265367	0.961305	0.265367	1.55592
ALTR2C_BT	3588	2	3.9893	0.174939	0.959058	0.174939	1.5113
Tigger2f	1514	1	6.24028	0.274746	0.958361	0.274746	1.48213
L3b	6997	3	3.11787	0.14013	0.958284	0.14013	1.40017
MER102c	1830	1	5.85976	0.289714	0.953407	0.289714	1.37243
L4_A_Mam	4208	2	3.64336	0.200581	0.948958	0.200581	1.30142
BLACKJACK	1711	1	5.58606	0.301511	0.949286	0.301511	1.29228
ERV1-1B-LTR_BT	4192	2	3.55516	0.207998	0.945867	0.207998	1.24789
Plat_L3	2036	1	5.27433	0.316164	0.943884	0.316164	1.1997
L1ME3C	1942	1	5.00853	0.329808	0.938577	0.329808	1.11975
LTR16A1	2048	1	5.00048	0.33024	0.938403	0.33024	1.11731
MER102a	2152	1	4.95381	0.332764	0.937388	0.332764	1.10317
MER91A	2243	1	4.91553	0.334863	0.936537	0.334863	1.09154
L4_B_Mam	2122	1	4.89649	0.335915	0.93611	0.335915	1.08576
L1M3c	1913	1	4.66682	0.349147	0.930578	0.349147	1.01564
L1ME4b	15805	6	2.25591	0.13969	0.960302	0.0965583	1.00333
LTR16	2277	1	4.44119	0.363189	0.924406	0.363189	0.946132
MER81	2544	1	4.42064	0.364525	0.9238	0.364525	0.939767
Tigger19b	2496	1	4.38972	0.36655	0.922882	0.36655	0.930196
MER34A	5230	2	3.01387	0.263599	0.920299	0.263599	0.921636
Bov-A2	362131	87	1.37954	0.0150008	0.994117	0.00837672	0.846625
MLT1G3	2427	1	4.09351	0.387118	0.913178	0.387118	0.838054
MER45A	2712	1	4.0216	0.392459	0.910543	0.392459	0.815567
MLT1O	2812	1	3.79649	0.410134	0.901496	0.410134	0.744989
LTR39C_BT	2817	1	3.64942	0.422539	0.894832	0.422539	0.698756
MER20B	2830	1	3.6333	0.423943	0.894061	0.423943	0.693684
L1MD2	8184	3	2.26992	0.260786	0.896816	0.260786	0.690328
MLT1F1	2761	1	3.60359	0.426554	0.892619	0.426554	0.684339
LTR78	2866	1	3.53439	0.432759	0.889142	0.432759	0.662564
ERVL-B4-int	2641	1	3.45541	0.440054	0.884971	0.440054	0.637717
L1MEd	10517	4	2.27377	0.291062	0.927001	0.182206	0.635223
MER5A1	12394	4	2.22799	0.29522	0.922009	0.19119	0.612376
Charlie8	3102	1	3.35789	0.449402	0.879479	0.449402	0.60704
L1MC3	10455	4	2.20369	0.297641	0.919201	0.196173	0.59995
MamRTE1	6660	2	2.45923	0.345662	0.87487	0.345662	0.598924
LTR33	6346	2	2.43299	0.350395	0.871969	0.350395	0.584208
L1MB1	5913	2	2.40404	0.355722	0.868667	0.355722	0.568051
LTR16A	3149	1	3.20982	0.464338	0.870381	0.464338	0.560549
OldhAT1	3541	1	3.17416	0.468081	0.868032	0.468081	0.549368
MLT1N2	3474	1	3.08455	0.477737	0.861863	0.477737	0.521338
MLT1H2	3483	1	3.02104	0.484813	0.857227	0.484813	0.501523
L1ME3	6560	2	2.21976	0.39241	0.844831	0.39241	0.467364
LTR1_BT	3520	1	2.69946	0.523908	0.829832	0.523908	0.402215
LTR10B_BT	3764	1	2.69459	0.524547	0.829355	0.524547	0.400726
L1M4	19274	6	1.68414	0.320647	0.871166	0.242542	0.371475
CHR-2	14174	4	1.75308	0.378141	0.838738	0.321642	0.342056
MER53	4934	1	2.231	0.592532	0.773792	0.592532	0.263129
LTR16C	4655	1	2.19526	0.598434	0.768461	0.598434	0.252951
CHR-2A	30203	8	1.53035	0.39984	0.857498	0.243393	0.244388
CHRL	28742	7	1.5047	0.385463	0.830033	0.288605	0.244055
L1MD3	4727	1	2.0922	0.616056	0.752016	0.616056	0.224059
Charlie1a	4591	1	2.02092	0.628783	0.739641	0.628783	0.204525
L2a	117287	28	1.27675	0.280629	0.877514	0.168522	0.194521
L3	33484	8	1.42194	0.425574	0.809708	0.305993	0.18843
L1ME4a	15591	4	1.65271	0.553209	0.810292	0.360361	0.186363
Mariner1_BT	8287	2	1.99613	0.665488	0.807883	0.444207	0.176365
MER3	8459	2	1.92798	0.671606	0.79444	0.461789	0.163737
MLT1A	7995	2	1.91049	0.673291	0.790804	0.466444	0.160449
L1MC4a	7814	2	1.85523	0.678949	0.778757	0.481565	0.149933
L1MC	8201	2	1.77746	0.687812	0.760289	0.503921	0.134871
SINE2-3_BT	21456	5	1.51064	0.606752	0.788626	0.367919	0.129143
Bov-tA2	537541	109	1.14283	0.287049	0.871955	0.154003	0.104401
MER58A	10045	2	1.58432	0.714925	0.705429	0.565248	0.0967507
MIR3	62466	13	1.24757	0.544581	0.757588	0.340851	0.0842278
MLT1C2	13169	3	1.51271	0.751157	0.726081	0.493885	0.0742049
CHR-2_BT	23727	5	1.3362	0.809087	0.704045	0.467904	0.0384702
MIRc	76415	15	1.1539	0.682453	0.680341	0.419927	0.0342661
MER5A	27050	5	1.21904	0.821076	0.629597	0.547042	0.0244644
ALTR2B1_BT	4908	1	1.98041	1	0.732201	0.636224	0
ALTR2B_BT	2948	0	1.6828	1	0.552398	1	0
ALTR39_BT	2349	0	2.01469	1	0.60912	1	0
AmnHarb1	97	0	53.2579	1	0.981589	1	0
AmnL2-1	1372	0	4.10397	1	0.783971	1	0
AmnSINE1	1905	0	2.91329	1	0.709726	1	0
AmnSINE2	534	0	10.4478	1	0.908906	1	0
ARLTR2	15	0	337.706	1	0.997228	1	0
Arthur1	1967	0	2.4651	1	0.666856	1	0
Arthur1A	784	0	6.9426	1	0.86605	1	0
Arthur1B	1859	0	2.7472	1	0.695178	1	0
Arthur1C	557	0	9.69286	1	0.902164	1	0
Arthur2	753	0	6.67877	1	0.861153	1	0
BtERV3B_LTR	1242	0	3.99903	1	0.778999	1	0
BtERVF1_I-int	268	0	13.389	1	0.928307	1	0
BtERVF1_LTR	364	0	12.9658	1	0.925984	1	0
BtERVF2_I-int	424	0	8.66244	1	0.891246	1	0
BtERVF2_LTR	232	0	20.1951	1	0.9519	1	0
BTLTR1B	1609	0	1.92793	1	0.595768	1	0
BTLTR1B1	852	0	3.73652	1	0.765542	1	0
BTLTR1C1	36	0	99.3728	1	0.990258	1	0
BTLTR1C	251	0	14.0859	1	0.931747	1	0
BTLTR1D	38	0	114.013	1	0.991491	1	0
BTLTR1E	123	0	36.1128	1	0.97291	1	0
BTLTR1E1	92	0	46.1155	1	0.97878	1	0
BTLTR1E2	66	0	70.0421	1	0.986036	1	0
BTLTR1E3	36	0	128.925	1	0.992482	1	0
BTLTR1F	415	0	9.23628	1	0.897648	1	0
BTLTR1J1	48	0	99.3002	1	0.990185	1	0
BTLTR1J2	31	0	142.817	1	0.993241	1	0
BTLTR1J3	41	0	116.615	1	0.991665	1	0
BTLTR1J4	148	0	32.0651	1	0.969502	1	0
Chap1_Mam	231	0	22.5975	1	0.956901	1	0
Charlie10	1009	0	4.95943	1	0.817619	1	0
Charlie10a	231	0	23.1406	1	0.957891	1	0
Charlie10b	197	0	27.1922	1	0.964077	1	0
Charlie11	106	0	44.7067	1	0.978088	1	0
Charlie12	3	0	1440.17	1	0.999479	1	0
Charlie13a	436	0	11.2092	1	0.914856	1	0
Charlie13b	278	0	18.8046	1	0.9484	1	0
Charlie14a	320	0	16.4062	1	0.941057	1	0
Charlie15a	1597	0	3.43081	1	0.747406	1	0
Charlie15b	1327	0	3.95438	1	0.776795	1	0
Charlie16	971	0	5.26604	1	0.827264	1	0
Charlie16a	749	0	7.14705	1	0.869627	1	0
Charlie17	432	0	11.6788	1	0.918137	1	0
Charlie17a	592	0	9.1815	1	0.896996	1	0
Charlie17b	379	0	12.9282	1	0.925769	1	0
Charlie18a	1607	0	3.31155	1	0.739614	1	0
Charlie19a	1086	0	4.91673	1	0.816178	1	0
Charlie1b	2525	0	2.03832	1	0.612617	1	0
Charlie20a	592	0	8.68002	1	0.891381	1	0
Charlie21a	477	0	10.3225	1	0.907873	1	0
Charlie22a	673	0	7.92179	1	0.881604	1	0
Charlie23a	855	0	6.26132	1	0.852593	1	0
Charlie24	982	0	5.26377	1	0.827195	1	0
Charlie25	814	0	5.78442	1	0.84147	1	0
Charlie26a	338	0	15.8067	1	0.938882	1	0
Charlie29a	609	0	8.07932	1	0.88379	1	0
Charlie29b	1012	0	5.2121	1	0.825636	1	0
Charlie2a	1639	0	2.97834	1	0.715082	1	0
Charlie2b	2619	0	1.90463	1	0.591915	1	0
Charlie30a	295	0	18.1945	1	0.946706	1	0
Charlie30b	396	0	13.4387	1	0.928477	1	0
Charlie31a	467	0	11.2018	1	0.91479	1	0
Charlie32a	156	0	34.8558	1	0.971899	1	0
Charlie4	870	0	6.08167	1	0.848584	1	0
Charlie4a	2176	0	2.29452	1	0.647065	1	0
Charlie4z	3595	0	1.53473	1	0.521661	1	0
Charlie5	2341	0	2.19941	1	0.634996	1	0
Charlie6	215	0	20.5948	1	0.952827	1	0
Charlie7	2828	0	1.75977	1	0.566919	1	0
Charlie7a	810	0	6.64463	1	0.860479	1	0
Charlie7b_Mars	59	0	85.2889	1	0.988538	1	0
Charlie9	827	0	6.54721	1	0.858554	1	0
Cheshire	1027	0	4.74934	1	0.810369	1	0
Chompy-6_Croc	143	0	39.5701	1	0.975219	1	0
CHR-1	132	0	42.2077	1	0.976763	1	0
CHR-2B	34444	6	1.02797	1	0.47971	0.674541	0
CR1-11_Crp	36	0	148.881	1	0.993487	1	0
CR1-12_AMi	102	0	50.6833	1	0.980653	1	0
CR1-13_AMi	69	0	76.3881	1	0.98718	1	0
CR1-16_AMi	250	0	20.8114	1	0.953276	1	0
CR1-1_Amn	43	0	122.107	1	0.992029	1	0
CR1-3_Croc	711	0	7.67837	1	0.87808	1	0
CR1-L3A_Croc	173	0	31.8351	1	0.969255	1	0
CR1-L3B_Croc	31	0	176.276	1	0.99452	1	0
CR1_Mam	1062	0	4.89264	1	0.815367	1	0
DNA1_Mam	135	0	39.0386	1	0.974896	1	0
ERV1-1C-LTR_BT	2945	0	1.528	1	0.520197	1	0
ERV1-1-LTR_BT	2348	0	2.01435	1	0.609069	1	0
ERV1-2C-LTR_BT	2667	0	1.80071	1	0.574283	1	0
ERV1-2-I_BT	3170	0	1.21733	1	0.440367	1	0
ERV1-2-LTR_BT	866	0	5.60985	1	0.836952	1	0
ERV1-3-I_BT	3480	0	1.39258	1	0.488176	1	0
ERV1-3-LTR_BT	2373	0	2.04947	1	0.614259	1	0
ERV2-1B-LTR_BT	524	0	6.128	1	0.849751	1	0
ERV2-1C-LTR_BT	221	0	15.0646	1	0.936069	1	0
ERV2-1-I_BT	1712	0	2.38184	1	0.65751	1	0
ERV2-2B_BT-I	290	0	10.2327	1	0.907229	1	0
ERV2-2-I_BT	153	0	21.296	1	0.954429	1	0
ERV2-2-LTR_BT	87	0	52.6843	1	0.981412	1	0
ERV2-3-I_BT	196	0	17.5835	1	0.945	1	0
ERV2-3-LTR_BT	209	0	21.1653	1	0.954074	1	0
ERV3-16A3_I-int	4261	0	1.07374	1	0.394642	1	0
ERV3-16A3_LTR	844	0	6.04686	1	0.847788	1	0
ERV54-EC_LTR	1816	0	2.79646	1	0.699646	1	0
ERVL-int	622	0	7.67445	1	0.878047	1	0
Eulor11	82	0	64.6558	1	0.984838	1	0
Eulor1	65	0	81.2283	1	0.98795	1	0
Eulor6A	24	0	217.423	1	0.995595	1	0
Eulor6B	58	0	90.6334	1	0.989213	1	0
Eulor6C	18	0	293.16	1	0.996774	1	0
Eulor6D	57	0	92.6173	1	0.989446	1	0
Eulor6E	24	0	217.004	1	0.995586	1	0
Eulor9A	93	0	57.7394	1	0.983013	1	0
Eulor9B	27	0	199.806	1	0.995186	1	0
Eulor9C	93	0	59.9535	1	0.983635	1	0
EuthAT-2	949	0	5.19293	1	0.825064	1	0
EuthAT-N1	48	0	108.626	1	0.991023	1	0
EuthAT-N1a	38	0	140.022	1	0.993066	1	0
Eutr11	440	0	11.4831	1	0.916799	1	0
Eutr2	25	0	203.298	1	0.995282	1	0
Eutr2B	41	0	125.143	1	0.992231	1	0
EUTREP16	245	0	22.1639	1	0.956066	1	0
EUTREP7	202	0	25.3637	1	0.961533	1	0
EUTREP8	166	0	32.4073	1	0.969797	1	0
EutTc1-N1	42	0	122.874	1	0.992083	1	0
EutTc1-N2	123	0	42.2742	1	0.976812	1	0
FordPrefect	485	0	9.46915	1	0.899999	1	0
FordPrefect_a	192	0	26.9423	1	0.963755	1	0
HAL1b	2713	0	1.82969	1	0.579343	1	0
HAL1M8	1729	0	2.7387	1	0.694407	1	0
HAL1ME	4723	0	1.08047	1	0.396921	1	0
hAT-1_Mam	988	0	5.1225	1	0.822879	1	0
hAT-5_Mam	665	0	7.82027	1	0.880165	1	0
hAT-N1a_Mam	322	0	16.4324	1	0.941147	1	0
hAT-N1_Mam	142	0	37.0244	1	0.97354	1	0
HERV16-int	1381	0	3.44995	1	0.748638	1	0
HERVL40-int	827	0	5.7611	1	0.840879	1	0
HERVL74-int	278	0	16.7258	1	0.942177	1	0
Kanga11a	634	0	8.17374	1	0.885044	1	0
Kanga1	675	0	7.59571	1	0.876848	1	0
Kanga1a	586	0	8.69484	1	0.891558	1	0
Kanga1b	296	0	16.9931	1	0.943047	1	0
Kanga1d	494	0	10.7227	1	0.911147	1	0
Kanga2_a	1176	0	4.27824	1	0.791804	1	0
L1_Art	61925	11	1.03541	1	0.51043	0.609097	0
L1M2	9462	2	1.45802	1	0.6612	0.610056	0
L1M3a	545	0	8.8188	1	0.893011	1	0
L1M3b	422	0	10.4802	1	0.90922	1	0
L1M3d	709	0	6.44321	1	0.856473	1	0
L1M3de	3240	0	1.32718	1	0.471258	1	0
L1M3e	291	0	16.1193	1	0.940059	1	0
L1M4a1	2024	0	2.20995	1	0.636396	1	0
L1M4a2	2129	0	2.06263	1	0.61619	1	0
L1M4b	3445	0	1.29209	1	0.461729	1	0
L1M4c	4692	1	1.74563	1	0.68251	0.682405	0
L1M6	3063	0	1.62422	1	0.540706	1	0
L1M6B	336	0	15.7486	1	0.938664	1	0
L1M	706	0	7.90323	1	0.881335	1	0
L1M7	1831	0	2.63758	1	0.684762	1	0
L1M8	1100	0	4.26885	1	0.791409	1	0
L1MA10	3802	0	1.33763	1	0.47401	1	0
L1MB2	6384	1	1.48731	1	0.611384	0.739677	0
L1MC5	11002	2	1.33676	1	0.611151	0.656628	0
L1MCa	6970	1	1.26997	1	0.533611	0.793121	0
L1MCb	1695	0	2.67088	1	0.688013	1	0
L1MCc	2220	0	2.13918	1	0.626943	1	0
L1MDa	5337	1	1.63728	1	0.655087	0.705583	0
L1MDb	948	0	4.85193	1	0.813993	1	0
L1ME2z	5477	1	1.78033	1	0.690628	0.675243	0
L1ME3B	5002	1	1.92127	1	0.720789	0.647355	0
L1ME3D	2424	0	1.96772	1	0.601955	1	0
L1ME3E	2474	0	1.93381	1	0.596623	1	0
L1ME3F	2716	0	1.74715	1	0.564608	1	0
L1ME5	1906	0	2.58139	1	0.679137	1	0
L1MEa	282	0	16.796	1	0.942408	1	0
L1MEb	1111	0	4.2674	1	0.791345	1	0
L1MEg1	665	0	7.29462	1	0.872109	1	0
L1MEg2	558	0	8.84308	1	0.893284	1	0
L1MEh	1756	0	2.75975	1	0.696337	1	0
L1MEi	3195	0	1.51888	1	0.51815	1	0
L1MEj	1505	0	3.21459	1	0.73293	1	0
L1P5	129	0	43.88	1	0.977642	1	0
L1PB4	500	0	9.48897	1	0.900191	1	0
L2-1_AMi	394	0	13.4376	1	0.928472	1	0
L2-1_Crp	25	0	207.936	1	0.995387	1	0
L2-2_Mam	364	0	15.1424	1	0.936274	1	0
L2d	16765	3	1.28491	1	0.622078	0.602486	0
LFSINE_Vert	1892	0	2.91149	1	0.709577	1	0
Looper	437	0	10.8145	1	0.91189	1	0
LTR101_Mam	673	0	7.50183	1	0.875408	1	0
LTR104_Mam	1045	0	5.07072	1	0.821233	1	0
LTR105_Mam	416	0	12.2846	1	0.922019	1	0
LTR106_Mam	447	0	11.3081	1	0.915564	1	0
LTR107_Mam	308	0	16.9067	1	0.942758	1	0
LTR108a_Mam	60	0	83.1771	1	0.988246	1	0
LTR108b_Mam	41	0	119.296	1	0.991851	1	0
LTR108c_Mam	34	0	140.308	1	0.993101	1	0
LTR108d_Mam	63	0	77.3373	1	0.987354	1	0
LTR108e_Mam	115	0	43.3559	1	0.977396	1	0
LTR109A1	169	0	29.0346	1	0.966345	1	0
LTR109A2	74	0	68.448	1	0.98569	1	0
LTR10A_BT	1629	0	2.88922	1	0.707728	1	0
LTR10_EC	399	0	12.0375	1	0.920491	1	0
LTR11B_BT	840	0	5.20244	1	0.825377	1	0
LTR11_BT	1963	0	2.54177	1	0.675051	1	0
LTR13B_BT	1512	0	3.30871	1	0.739432	1	0
LTR13_BT	924	0	5.52835	1	0.834747	1	0
LTR16A2	1402	0	3.62469	1	0.759152	1	0
LTR16B1	897	0	5.50384	1	0.834082	1	0
LTR16B2	1076	0	4.6241	1	0.80576	1	0
LTR16B	558	0	8.97771	1	0.894796	1	0
LTR16D1	175	0	28.8647	1	0.966144	1	0
LTR16D2	207	0	24.5794	1	0.960326	1	0
LTR16D	714	0	7.29206	1	0.872054	1	0
LTR16E1	1786	0	2.87333	1	0.706362	1	0
LTR16E2	1483	0	3.41801	1	0.746604	1	0
LTR18A_BT	676	0	7.0367	1	0.867744	1	0
LTR18B_BT	435	0	10.9356	1	0.912823	1	0
LTR18C_BT	70	0	72.0685	1	0.986414	1	0
LTR2B_BT	340	0	12.2705	1	0.921974	1	0
LTR2_BT	331	0	11.8994	1	0.919648	1	0
LTR2C_BT	181	0	22.748	1	0.957231	1	0
LTR31B_BT	615	0	7.88963	1	0.881168	1	0
LTR32_BT	1446	0	3.4774	1	0.750342	1	0
LTR33A_	1245	0	4.05968	1	0.781909	1	0
LTR33A	1606	0	3.18042	1	0.730477	1	0
LTR33B	1015	0	5.1514	1	0.823774	1	0
LTR33C	758	0	6.77244	1	0.862934	1	0
LTR37A	1541	0	3.34544	1	0.741883	1	0
LTR37B	1492	0	3.45007	1	0.748632	1	0
LTR37-int	944	0	5.04527	1	0.820436	1	0
LTR39A_BT	622	0	7.65624	1	0.877775	1	0
LTR39B_BT	1820	0	2.58841	1	0.679857	1	0
LTR39C2_BT	1004	0	4.92656	1	0.816523	1	0
LTR3_BT	105	0	43.0342	1	0.977248	1	0
LTR40A1	404	0	12.6869	1	0.9244	1	0
LTR40a	1580	0	3.09249	1	0.72399	1	0
LTR40b	1012	0	4.96461	1	0.81779	1	0
LTR40c	435	0	11.3348	1	0.91576	1	0
LTR41	921	0	5.39697	1	0.831087	1	0
LTR41B	677	0	7.42094	1	0.874139	1	0
LTR41C	576	0	8.95504	1	0.894539	1	0
LTR45	11	0	447.899	1	0.997956	1	0
LTR45B_BT	104	0	46.1549	1	0.978772	1	0
LTR45_BT	174	0	27.845	1	0.964927	1	0
LTR45C	70	0	75.5645	1	0.987039	1	0
LTR46_BT	183	0	25.0009	1	0.961006	1	0
LTR47_BT	356	0	14.0422	1	0.931462	1	0
LTR4_BT	559	0	8.80847	1	0.892888	1	0
LTR50	2007	0	2.55888	1	0.676823	1	0
LTR52	809	0	6.22364	1	0.85178	1	0
LTR52-int	156	0	29.9106	1	0.967331	1	0
LTR53	365	0	13.1762	1	0.927121	1	0
LTR53B	148	0	32.012	1	0.969452	1	0
LTR53-int	319	0	13.6681	1	0.929677	1	0
LTR58	3	0	1417.99	1	0.999471	1	0
LTR5_BT	936	0	5.5307	1	0.834809	1	0
LTR65	341	0	14.6942	1	0.934408	1	0
LTR67B	2506	0	2.10841	1	0.622671	1	0
LTR68	287	0	17.7291	1	0.945351	1	0
LTR69	1	0	2791.63	1	0.999821	1	0
LTR6B_BT	364	0	13.8578	1	0.930578	1	0
LTR6_BT	169	0	29.8218	1	0.967219	1	0
LTR71_BT	141	0	36.7383	1	0.973338	1	0
LTR73	1	0	2820.13	1	0.999823	1	0
LTR73_BT	335	0	14.994	1	0.93568	1	0
LTR75_1	43	0	124.591	1	0.992188	1	0
LTR75	180	0	27.2382	1	0.964154	1	0
LTR75B	150	0	31.6306	1	0.969087	1	0
LTR75_BT	706	0	6.92999	1	0.865843	1	0
LTR77	21	0	254.001	1	0.996249	1	0
LTR78B	1875	0	2.78092	1	0.698246	1	0
LTR79	2365	0	2.23201	1	0.639218	1	0
LTR7_BT	141	0	31.3193	1	0.968798	1	0
LTR80A	320	0	15.4505	1	0.937528	1	0
LTR80B	342	0	14.7197	1	0.934518	1	0
LTR81	229	0	22.8419	1	0.957354	1	0
LTR81A	506	0	10.2648	1	0.90737	1	0
LTR81AB	153	0	34.6139	1	0.971709	1	0
LTR81B	657	0	7.8803	1	0.881024	1	0
LTR81C	395	0	13.1211	1	0.926811	1	0
LTR82A	928	0	5.37213	1	0.830375	1	0
LTR82B	869	0	5.81034	1	0.842105	1	0
LTR83	527	0	9.67989	1	0.902049	1	0
LTR84a	470	0	11.0288	1	0.913512	1	0
LTR84b	692	0	7.38623	1	0.873583	1	0
LTR86A1	328	0	15.5912	1	0.938069	1	0
LTR86A2	248	0	20.8984	1	0.953467	1	0
LTR86B1	214	0	24.2618	1	0.959811	1	0
LTR86B2	174	0	29.4809	1	0.966841	1	0
LTR86C	264	0	19.4482	1	0.950074	1	0
LTR8_BT	373	0	13.1576	1	0.927017	1	0
LTR90A	252	0	21.1163	1	0.953933	1	0
LTR90B	316	0	17.0516	1	0.943225	1	0
LTR91	949	0	5.53315	1	0.834874	1	0
LTR9A_EC	422	0	11.4846	1	0.916817	1	0
LTR9B_EC	383	0	12.4254	1	0.922883	1	0
LTR9_BT	435	0	11.091	1	0.91399	1	0
MADE2	1614	0	3.53035	1	0.753562	1	0
MamGyp-int	436	0	11.354	1	0.915895	1	0
MamGypLTR1a	665	0	7.85846	1	0.880711	1	0
MamGypLTR1b	702	0	7.48424	1	0.875127	1	0
MamGypLTR1c	559	0	9.29614	1	0.898209	1	0
MamGypLTR1d	424	0	12.3181	1	0.922219	1	0
MamGypLTR2b	512	0	10.4342	1	0.9088	1	0
MamGypLTR2c	560	0	9.42535	1	0.899531	1	0
MamGypLTR3	367	0	14.244	1	0.932393	1	0
MamGypLTR3a	727	0	7.17144	1	0.870046	1	0
MamGypLTR4	432	0	12.0896	1	0.920805	1	0
MamGypsy2-I	1633	0	3.095	1	0.724174	1	0
MamGypsy2-LTR	512	0	10.7847	1	0.911628	1	0
Mam_R4	410	0	12.6977	1	0.924459	1	0
MamRep1527	852	0	6.03057	1	0.847409	1	0
MamRep1879	811	0	6.73057	1	0.862131	1	0
MamRep1894	297	0	18.8371	1	0.948475	1	0
MamRep4096	814	0	6.52217	1	0.858055	1	0
MamRep434	1261	0	4.20743	1	0.788689	1	0
MamRep488	268	0	20.3842	1	0.952307	1	0
MamRTE2	38	0	138.771	1	0.993004	1	0
MamSINE1	3612	0	1.51854	1	0.518057	1	0
MamTip1	459	0	11.6025	1	0.917611	1	0
MamTip1b	264	0	20.3743	1	0.952287	1	0
MamTip3	695	0	7.60158	1	0.876932	1	0
MamTip3B	540	0	9.88151	1	0.903944	1	0
MARE10	58	0	91.3225	1	0.989294	1	0
MARE4	196	0	28.5849	1	0.965797	1	0
MARE6	113	0	44.058	1	0.977756	1	0
MARE8	138	0	39.7434	1	0.975332	1	0
MARNA	2023	0	2.60299	1	0.68131	1	0
MER102b	1949	0	2.7024	1	0.690996	1	0
MER103C	5840	1	1.84751	1	0.705545	0.661712	0
MER104	1415	0	3.84033	1	0.770982	1	0
MER105	573	0	9.48036	1	0.90008	1	0
MER106A	489	0	10.7874	1	0.911658	1	0
MER106B	679	0	7.85851	1	0.880708	1	0
MER110	530	0	9.65305	1	0.90179	1	0
MER110A	500	0	10.2174	1	0.906963	1	0
MER110-int	346	0	13.7103	1	0.929868	1	0
MER112	2787	0	1.92597	1	0.595352	1	0
MER115	1704	0	2.96905	1	0.714326	1	0
MER117	2617	0	2.09013	1	0.620092	1	0
MER119	986	0	5.13647	1	0.823315	1	0
MER121	782	0	6.70995	1	0.861744	1	0
MER121B	55	0	95.3174	1	0.98975	1	0
MER125	128	0	42.7649	1	0.977067	1	0
MER126	199	0	26.9141	1	0.963711	1	0
MER127	157	0	33.665	1	0.970919	1	0
MER130	134	0	38.6577	1	0.974654	1	0
MER132	36	0	149.875	1	0.99353	1	0
MER133A	38	0	145.823	1	0.993341	1	0
MER133B	27	0	201.719	1	0.995232	1	0
MER134	69	0	78.2711	1	0.987487	1	0
MER136	26	0	195.649	1	0.995091	1	0
MER21-int	490	0	9.78569	1	0.903069	1	0
MER31A	567	0	8.70455	1	0.891678	1	0
MER31B	1176	0	4.23178	1	0.789778	1	0
MER31_BT	321	0	14.9833	1	0.935644	1	0
MER31-int	2054	0	2.36306	1	0.65529	1	0
MER33	7547	1	1.38652	1	0.577656	0.763892	0
MER34A1	3423	0	1.54764	1	0.524505	1	0
MER34B-int	1326	0	3.72889	1	0.765026	1	0
MER34-int	622	0	7.97532	1	0.882364	1	0
MER45C	869	0	5.79704	1	0.841773	1	0
MER46C	2202	0	2.36745	1	0.655793	1	0
MER4B-int	350	0	14.6508	1	0.934216	1	0
MER52-int	323	0	13.9462	1	0.931026	1	0
MER58C	1818	0	2.99428	1	0.716342	1	0
MER58D	935	0	5.86688	1	0.843488	1	0
MER5C	1021	0	5.15397	1	0.823853	1	0
MER5C1	416	0	12.917	1	0.92569	1	0
MER63A	2204	0	2.41661	1	0.661442	1	0
MER63B	2067	0	2.57711	1	0.678688	1	0
MER63C	722	0	6.47858	1	0.857194	1	0
MER63D	1914	0	2.80656	1	0.700537	1	0
MER67A	351	0	14.3763	1	0.933002	1	0
MER67B	369	0	13.371	1	0.928141	1	0
MER67C	1260	0	3.93382	1	0.77578	1	0
MER67D	940	0	5.34525	1	0.829597	1	0
MER68	1226	0	3.91948	1	0.775065	1	0
MER68B	372	0	13.1732	1	0.927101	1	0
MER68C	117	0	43.195	1	0.97731	1	0
MER68-int	194	0	24.2527	1	0.959815	1	0
MER70C	291	0	16.8933	1	0.942724	1	0
MER70-int	79	0	64.9443	1	0.984911	1	0
MER74A	1374	0	3.53339	1	0.753772	1	0
MER74B	700	0	7.07748	1	0.868447	1	0
MER74C	208	0	23.9454	1	0.959296	1	0
MER76	571	0	8.46378	1	0.888774	1	0
MER76-int	147	0	31.3518	1	0.968821	1	0
MER77B	1073	0	4.50702	1	0.801254	1	0
MER83A-int	20	0	253.663	1	0.996253	1	0
MER83B-int	44	0	124.525	1	0.992179	1	0
MER87A2_BT	151	0	32.2661	1	0.969685	1	0
MER87B_BT	3244	0	1.51344	1	0.516926	1	0
MER87_BT	1874	0	2.61841	1	0.682863	1	0
MER88	144	0	34.4486	1	0.971587	1	0
MER89	1227	0	4.07166	1	0.782478	1	0
MER89-int	405	0	11.5317	1	0.917151	1	0
MER90	520	0	9.45209	1	0.899814	1	0
MER91B	1047	0	5.3303	1	0.829145	1	0
MER91C	990	0	5.71036	1	0.839554	1	0
MER92A	177	0	28.9366	1	0.966224	1	0
MER92B	558	0	8.84164	1	0.893267	1	0
MER92C	126	0	38.7211	1	0.974707	1	0
MER92D	182	0	28.3823	1	0.965571	1	0
MER94B	344	0	16.3266	1	0.940765	1	0
MER96B	1630	0	3.28106	1	0.737542	1	0
MER97a	197	0	23.8182	1	0.959094	1	0
MER97b	196	0	25.0823	1	0.961116	1	0
MER97c	185	0	25.6635	1	0.961991	1	0
MER97d	94	0	50.7292	1	0.980686	1	0
MER99	182	0	27.1806	1	0.964077	1	0
MERX	247	0	20.9815	1	0.953648	1	0
MLT1A0-int	325	0	14.3962	1	0.933107	1	0
MLT1A-int	315	0	15.0548	1	0.935943	1	0
MLT1B-int	330	0	14.5614	1	0.933837	1	0
MLT1C2-int	324	0	14.5366	1	0.933732	1	0
MLT1C-int	97	0	48.6513	1	0.979864	1	0
MLT1D-int	424	0	10.6513	1	0.910609	1	0
MLT1E1	1034	0	4.88602	1	0.815146	1	0
MLT1E1A	2783	0	1.78508	1	0.571497	1	0
MLT1E1A-int	72	0	64.0361	1	0.984718	1	0
MLT1E1-int	25	0	190.483	1	0.994965	1	0
MLT1E2	3319	0	1.45992	1	0.504582	1	0
MLT1E2-int	106	0	43.998	1	0.977739	1	0
MLT1E3	1641	0	3.0172	1	0.718175	1	0
MLT1E3-int	46	0	100.163	1	0.990277	1	0
MLT1E	799	0	6.26476	1	0.85268	1	0
MLT1E-int	20	0	219.516	1	0.995671	1	0
MLT1F1-int	164	0	28.2126	1	0.965388	1	0
MLT1F2	4584	0	1.06178	1	0.390528	1	0
MLT1F2-int	181	0	25.3681	1	0.961562	1	0
MLT1F	3356	0	1.4548	1	0.503368	1	0
MLT1F-int	401	0	11.9103	1	0.919676	1	0
MLT1G1	2553	0	1.93183	1	0.596302	1	0
MLT1G1-int	273	0	16.9799	1	0.943021	1	0
MLT1G	2205	0	2.24445	1	0.640815	1	0
MLT1G3-int	201	0	23.0653	1	0.957784	1	0
MLT1G-int	148	0	32.2109	1	0.969638	1	0
MLT1H1	2668	0	1.86325	1	0.585065	1	0
MLT1H1-int	223	0	21.0089	1	0.953727	1	0
MLT1H2-int	247	0	18.983	1	0.948895	1	0
MLT1H-int	643	0	7.55345	1	0.876213	1	0
MLT1I-int	510	0	9.63478	1	0.90162	1	0
MLT1-int	224	0	22.014	1	0.955791	1	0
MLT1J1	3597	0	1.46329	1	0.505365	1	0
MLT1J1-int	337	0	14.3335	1	0.932817	1	0
MLT1J2	4591	0	1.13681	1	0.415498	1	0
MLT1J2-int	367	0	12.9991	1	0.926165	1	0
MLT1J-int	1233	0	4.05404	1	0.781644	1	0
MLT1K-int	84	0	61.4387	1	0.984046	1	0
MLT1L	7677	1	1.35881	1	0.567695	0.770729	0
MLT1L-int	54	0	91.0256	1	0.989273	1	0
MLT1M	1203	0	4.42449	1	0.797931	1	0
MLT1M-int	1	0	2773.62	1	0.99982	1	0
MLT1N2-int	24	0	208.135	1	0.995399	1	0
MLT1O-int	4	0	1039.02	1	0.99923	1	0
MLT2B1	2876	0	1.70259	1	0.556222	1	0
MLT2B2	962	0	5.16577	1	0.824228	1	0
MLT2B3	127	0	38.3651	1	0.974473	1	0
MLT2C1	1924	0	2.66436	1	0.687363	1	0
MLT2D	3287	0	1.54856	1	0.52471	1	0
MLT2E	338	0	15.47	1	0.937594	1	0
MLT2F	1455	0	3.38049	1	0.744191	1	0
MLT-int	197	0	26.0358	1	0.962512	1	0
Oamar1	26	0	177.442	1	0.994588	1	0
OldhAT-N1a	11	0	443.14	1	0.997934	1	0
OldhAT-N1b	10	0	500.415	1	0.998185	1	0
OldhAT-N1c	1	0	2853.43	1	0.999825	1	0
ORSL-2a	249	0	20.9335	1	0.953542	1	0
ORSL-2b	554	0	9.2797	1	0.89804	1	0
ORSL	937	0	5.73663	1	0.840235	1	0
Tigger10	1003	0	5.17467	1	0.824494	1	0
Tigger11a	275	0	18.482	1	0.947526	1	0
Tigger12	596	0	8.74196	1	0.892107	1	0
Tigger12A	454	0	11.8893	1	0.919517	1	0
Tigger12c	518	0	10.3087	1	0.907741	1	0
Tigger14a	788	0	6.90555	1	0.865382	1	0
Tigger15a	2999	0	1.75604	1	0.566228	1	0
Tigger16a	1175	0	4.54656	1	0.802783	1	0
Tigger16b	893	0	6.14836	1	0.850092	1	0
Tigger17	71	0	67.193	1	0.985433	1	0
Tigger17a	1813	0	2.56787	1	0.677764	1	0
Tigger17b	68	0	68.4244	1	0.985702	1	0
Tigger17c	311	0	16.1562	1	0.940178	1	0
Tigger17d	386	0	13.3956	1	0.92826	1	0
Tigger18a	979	0	5.06224	1	0.820974	1	0
Tigger19a	2337	0	2.31744	1	0.649845	1	0
Tigger1a_Mars	140	0	35.8337	1	0.972675	1	0
Tigger20a	863	0	5.97119	1	0.846013	1	0
Tigger21a	133	0	38.0132	1	0.974231	1	0
Tigger22N1	747	0	7.09095	1	0.868668	1	0
Tigger23a	370	0	14.392	1	0.933063	1	0
Tigger2	908	0	5.8491	1	0.843057	1	0
Tigger2a	6	0	791.891	1	0.998918	1	0
Tigger2a_Car	87	0	63.4345	1	0.984537	1	0
Tigger6	224	0	22.6832	1	0.957066	1	0
Tigger6a	475	0	9.03513	1	0.895461	1	0
Tigger6b	186	0	27.4897	1	0.964469	1	0
Tigger8	645	0	8.00046	1	0.882704	1	0
Tigger9a	753	0	6.94507	1	0.866102	1	0
Tigger9b	665	0	7.44968	1	0.874596	1	0
UCON11	47	0	109.368	1	0.991088	1	0
UCON15	40	0	131.747	1	0.992623	1	0
UCON29	183	0	28.8193	1	0.966083	1	0
UCON33	98	0	52.9183	1	0.98147	1	0
UCON34	222	0	24.8956	1	0.960807	1	0
UCON35	120	0	46.2481	1	0.978787	1	0
UCON37	124	0	43.3395	1	0.977374	1	0
UCON38	141	0	38.0769	1	0.974263	1	0
UCON39	75	0	72.3101	1	0.986447	1	0
UCON40	157	0	33.4382	1	0.970725	1	0
UCON4	141	0	38.349	1	0.974443	1	0
UCON58	123	0	43.4386	1	0.977426	1	0
UCON59	45	0	120.443	1	0.991912	1	0
UCON73	158	0	34.9409	1	0.971964	1	0
UCON78	153	0	34.9386	1	0.971968	1	0
UCON80	32	0	165.473	1	0.994158	1	0
UCON81	31	0	179.387	1	0.994615	1	0
UCON8	160	0	33.0842	1	0.970412	1	0
UCON86	91	0	59.2908	1	0.983458	1	0
UCON97	39	0	137.445	1	0.992932	1	0
X10b_DNA	146	0	37.7754	1	0.974054	1	0
X11_DNA	159	0	33.2145	1	0.970528	1	0
X12_LINE	190	0	29.2258	1	0.96654	1	0
X13_LINE	103	0	50.8509	1	0.980715	1	0
X15_LINE	181	0	30.8493	1	0.968281	1	0
X17_LINE	766	0	7.19587	1	0.870448	1	0
X1_DNA	471	0	10.9941	1	0.913251	1	0
X1_LINE	64	0	76.8477	1	0.987271	1	0
X1_LR	14	0	368.228	1	0.997469	1	0
X20_LINE	121	0	43.5152	1	0.977468	1	0
X21_LINE	39	0	132.933	1	0.992693	1	0
X23_DNA	58	0	90.4555	1	0.989192	1	0
X24_DNA	331	0	16.8595	1	0.942589	1	0
X24_LINE	449	0	12.3266	1	0.92226	1	0
X26_DNA	587	0	8.89227	1	0.893832	1	0
X2a_DNA	264	0	21.0092	1	0.953695	1	0
X2b_DNA	105	0	52.9755	1	0.981477	1	0
X2_LINE	150	0	34.8056	1	0.971866	1	0
X30_DNA	461	0	11.7142	1	0.918362	1	0
X32_DNA	235	0	22.5848	1	0.956874	1	0
X33a_DNA	76	0	66.5808	1	0.985287	1	0
X34_DNA	67	0	81.1606	1	0.987935	1	0
X4a_DNA	121	0	44.2273	1	0.977827	1	0
X4b_DNA	424	0	12.5835	1	0.923794	1	0
X5a_DNA	249	0	22.1666	1	0.956069	1	0
X5B_LINE	55	0	102.255	1	0.990442	1	0
X6a_DNA	607	0	8.86524	1	0.89352	1	0
X6A_LINE	950	0	5.78304	1	0.841407	1	0
X6b_DNA	527	0	10.3364	1	0.907973	1	0
X7A_LINE	599	0	9.17025	1	0.896874	1	0
X7B_LINE	568	0	9.67142	1	0.901954	1	0
X7C_LINE	398	0	13.8349	1	0.930451	1	0
X7D_LINE	25	0	219.388	1	0.995627	1	0
X8_LINE	169	0	32.4359	1	0.96982	1	0
X9a_DNA	443	0	12.045	1	0.920519	1	0
X9b_DNA	403	0	13.0936	1	0.92666	1	0
X9_LINE	538	0	10.4028	1	0.908529	1	0
Zaphod	1823	0	2.70504	1	0.691255	1	0
Zaphod2	542	0	9.46456	1	0.899931	1	0
Zaphod3	1074	0	4.85275	1	0.813998	1	0
Zaphod4a	273	0	18.3342	1	0.947116	1	0
Zaphod5a	54	0	94.4177	1	0.989656	1	0
Zaphod5b	45	0	117.496	1	0.991709	1	0
SINE2-1_BT	34074	5	0.974887	0.838216	0.422817	0.73491	-0.00281236
MLT1D	15092	2	0.977092	0.77511	0.408711	0.811042	-0.00369903
L1MD1	4565	0	0.974773	0.631647	0.359139	1	-0.00735479
Tigger1a_Art	5245	0	0.967794	0.631722	0.356485	1	-0.00942088
L1MC2	4818	0	0.966612	0.631732	0.356046	1	-0.00977217
MLT1K	11666	1	0.883547	0.732599	0.340367	0.895915	-0.0241376
MLT1A0	11455	1	0.881631	0.732748	0.339215	0.896423	-0.024545
L1ME3A	11053	1	0.868916	0.733817	0.33152	0.899791	-0.0272469
ERVL-E-int	5269	0	0.896167	0.633709	0.328321	1	-0.0313332
L2d2	31234	4	0.86694	0.670888	0.319543	0.826152	-0.0357095
MLT1C	5702	0	0.877018	0.634692	0.320438	1	-0.0373792
MER58B	6091	0	0.856314	0.636	0.31175	1	-0.0439839
Tigger2a_Art	6323	0	0.846648	0.636704	0.307632	1	-0.0470875
L1ME4c	6269	0	0.815455	0.639408	0.294093	1	-0.0571641
Tigger1	5335	0	0.812062	0.639735	0.292612	1	-0.0582654
L1MC4	17797	2	0.810795	0.595918	0.287003	0.883445	-0.0680265
MLT1H	7093	0	0.714844	0.653628	0.247637	1	-0.0894352
L1MB4	6725	0	0.706828	0.655186	0.24376	1	-0.0919219
MER20	13677	1	0.777109	0.529042	0.273714	0.923565	-0.100597
MLT1I	7424	0	0.702776	0.412037	0.24178	1	-0.195945
MLT1B	14952	1	0.674322	0.381086	0.205622	0.948264	-0.238185
L1M5	35493	4	0.694142	0.339691	0.158054	0.92716	-0.246977
ERV2-1-LTR_BT	8097	0	0.583319	0.42492	0.180908	1	-0.289045
L1MEf	7902	0	0.560068	0.431304	0.168546	1	-0.305439
L1MD	8674	0	0.550603	0.434388	0.163472	1	-0.311757
Bov-tA3	345315	49	0.781221	0.0913085	0.0446045	0.96775	-0.370262
Bov-tA1	216595	31	0.753505	0.0969247	0.0510185	0.965242	-0.41385
MER5B	19003	1	0.578336	0.274455	0.141736	0.968278	-0.443619
CHRL1_BT	18852	1	0.576531	0.274648	0.140562	0.968617	-0.445909
L1MB7	16287	1	0.567254	0.275904	0.134559	0.970334	-0.457423
L1M3	16123	1	0.559764	0.27727	0.129743	0.971691	-0.466351
L1ME3Cz	9262	0	0.529949	0.273103	0.152357	1	-0.516367
L1MEg	8935	0	0.520749	0.273742	0.147392	1	-0.529654
L1ME2	9120	0	0.510087	0.274871	0.141625	1	-0.544709
L1MA9	46448	5	0.606324	0.142603	0.0739485	0.967584	-0.610584
L1ME3G	11085	0	0.452803	0.289639	0.110678	1	-0.615121
BTLTR1J	22110	1	0.515513	0.196344	0.102117	0.97912	-0.675817
L2	44415	4	0.558226	0.121841	0.0586681	0.977324	-0.768922
L1ME1	20665	1	0.438775	0.145567	0.0593944	0.989339	-0.994655
L1MEc	13196	0	0.340003	0.128309	0.0534853	1	-1.38789
HAL1	14502	0	0.326198	0.0820592	0.0472747	1	-1.75496
L1MC1	14321	0	0.317113	0.0827668	0.0433345	1	-1.79304
L1-3_BT	58431	4	0.333645	0.00186281	0.0010306	0.999746	-4.323
L1-2_BT	111037	6	0.293367	4.65322e-05	2.28893e-05	0.999995	-7.66471
BTLTR1	82729	1	0.130727	1.15679e-05	4.92215e-06	1	-14.4912
L1_BT	88749	1	0.0770584	5.91198e-10	3.37921e-10	1	-34.1252
BovB	562047	43	0.227282	5.70985e-28	3.99608e-28	1	-58.2312
