# Supplementary material for: Ruminant-specific retrotransposons shape regulatory evolution of bovine immunity
Source: HighWire-hosted journal article supplement (doi:10.1101/gr.276241.121), 2022-08-01
Supplement: Supplemental_Table_S9.xlsx [file Supplemental_Table_S9.xlsx]

## Sheet: Description
Supplemental Table S9
Absolute distances for IFNG-inducible MER41_BT to nearest MDBK ISG
Description of columns
Chromosome	TE chromosome
Start	TE start coordinate
End	TE end coordinate
Family	TE family
Class	TE class
Strand	TE strand
Gene chromosome	Gene chromosome
Gene start	Gene start coordinate
Gene end	Gene end coordinate
Gene id	Gene ID
Gene name	Gene name
Gene strand	Gene strand
Absolute distance to TSS (bp)	Distance from TE start to gene transcriptional start site

## Sheet: MER41_BT distance to ISG TSS
Chromosome	Start	End	Family	Class	Strand	Gene chromosome	Gene start	Gene end	Gene id	Gene name	Gene strand	Absolute distance to TSS (bp)
chr5	75591298	75591607	MER41_BT	LTR	-	chr5	75591454	75591455	XM_010805352.3	LOC510185	-	0
chr29	18039110	18039752	MER41_BT	LTR	+	chr29	18041194	18041195	NM_001110065.2	INTS4	+	1443
chr5	108117447	108117783	MER41_BT	LTR	+	chr5	108113822	108113823	XR_234734.4	FBXL14	-	3625
chr1	151154221	151155588	MER41_BT	LTR	+	chr1	151162151	151162152	NM_001080214.1	ETS2	+	6564
chr20	62710318	62710967	MER41_BT	LTR	-	chr20	62703564	62703565	XM_010816845.3	ANKRD33B	-	6754
chr6	86456952	86457315	MER41_BT	LTR	-	chr6	86449494	86449495	XM_015471675.2	SLC4A4	+	7458
chr8	503992	504381	MER41_BT	LTR	-	chr8	495871	495872	NM_001192058.1	ANXA10	+	8121
chr11	101307328	101307794	MER41_BT	LTR	-	chr11	101296724	101296725	XM_024999202.1	AIF1L	+	10604
chr23	25831675	25831742	MER41_BT	LTR	-	chr23	25843091	25843092	NM_001012677.1	BOLA-DRA	-	11350
chr18	47784435	47785029	MER41_BT	LTR	-	chr18	47769210	47769211	XM_024979039.1	SIPA1L3	+	15225
chr10	58593536	58593829	MER41_BT	LTR	+	chr10	58609742	58609743	XM_024997615.1	TMOD2	-	15914
chr12	16473716	16473961	MER41_BT	LTR	+	chr12	16491053	16491054	XM_025000035.1	LRCH1	+	17093
chr1	2368871	2369745	MER41_BT	LTR	-	chr1	2350079	2350080	NM_174553.2	IFNAR2	-	18792
chr10	36648728	36649195	MER41_BT	LTR	-	chr10	36628890	36628891	NM_001205384.1	INO80	-	19838
chr5	65682121	65682599	MER41_BT	LTR	+	chr5	65703022	65703023	XR_003034587.1	DRAM1	+	20424
chr4	38907675	38908057	MER41_BT	LTR	+	chr4	38928996	38928997	XM_024990489.1	HGF	+	20940
chr9	69180927	69181505	MER41_BT	LTR	-	chr9	69202949	69202950	XM_005210925.3	AKAP7	+	21445
chr5	85089178	85089513	MER41_BT	LTR	-	chr5	85057073	85057074	NM_001083644.1	BCAT1	+	32105
chr19	61830915	61831486	MER41_BT	LTR	-	chr19	61867803	61867804	NM_001192672.2	SLC16A6	+	36318
chr16	36798718	36799034	MER41_BT	LTR	+	chr16	36759192	36759193	NM_001035334.1	ATP1B1	+	39526
chr18	49716666	49717291	MER41_BT	LTR	-	chr18	49767617	49767618	NM_001040564.2	SERTAD1	-	50327
chr16	1525233	1526477	MER41_BT	LTR	+	chr16	1581202	1581203	XR_003029608.1	ZC3H11A	+	54726
chr3	30441809	30442215	MER41_BT	LTR	-	chr3	30380729	30380730	XM_024986151.1	SLC16A1	+	61080
chr11	48499559	48499958	MER41_BT	LTR	+	chr11	48434520	48434521	XM_024998894.1	KDM3A	-	65039
chr9	13032501	13032897	MER41_BT	LTR	+	chr9	12957912	12957913	XM_002690020.6	CGAS	-	74589
chr10	81420683	81421208	MER41_BT	LTR	-	chr10	81344778	81344779	XM_002690985.5	SUSD6	+	75905
chr11	10362991	10363578	MER41_BT	LTR	-	chr11	10446264	10446265	NM_001075755.2	MTHFD2	-	82687
chr5	82736112	82736440	MER41_BT	LTR	-	chr5	82646618	82646619	NM_001101092.2	STK38L	-	89494
chr3	77166346	77166839	MER41_BT	LTR	+	chr3	77070849	77070850	XM_010803446.3	WLS	+	95497
chr27	7132537	7132792	MER41_BT	LTR	-	chr27	7234503	7234504	XR_003032979.1	LOC112444616	-	101712
chr3	12259913	12260456	MER41_BT	LTR	+	chr3	12372280	12372281	XM_024989893.1	KIRREL1	-	111825
chr20	24447479	24447727	MER41_BT	LTR	+	chr20	24575117	24575118	NM_001083731.1	SNX18	-	127391
chr2	128316818	128317404	MER41_BT	LTR	-	chr2	128188875	128188876	NM_001080218.2	CLIC4	-	127943
chr19	17857396	17857990	MER41_BT	LTR	+	chr19	18003359	18003360	NM_001098936.1	RNF135	-	145370
chr9	45322690	45323183	MER41_BT	LTR	+	chr9	45142768	45142769	XM_024996668.1	HACE1	+	179922
chr21	2745431	2745831	MER41_BT	LTR	+	chr21	2940354	2940355	XM_010816883.3	ATP10A	-	194524
chr25	24702732	24703194	MER41_BT	LTR	-	chr25	24898783	24898784	NM_001075142.1	IL4R	+	195590
chr16	79699801	79701462	MER41_BT	LTR	+,-	chr16	79497875	79497876	XM_024976920.1	INAVA	+	201926
chr3	8048531	8048777	MER41_BT	LTR	+	chr3	7846119	7846120	XM_024989876.1	ATF6	-	202412
chr3	1571542	1571835	MER41_BT	LTR	+	chr3	1366913	1366914	XM_024987863.1	POU2F1	-	204629
chr10	4651224	4651387	MER41_BT	LTR	+	chr10	4444603	4444604	NM_001046456.1	TICAM2	-	206621
chr3	1587578	1588012	MER41_BT	LTR	-	chr3	1366913	1366914	XM_024987863.1	POU2F1	-	220665
chr4	7925115	7925368	MER41_BT	LTR	+	chr4	7697285	7697286	NM_001079785.1	C4H7orf57	-	227830
chr24	21510074	21510502	MER41_BT	LTR	+	chr24	21748058	21748059	XM_015460039.2	ZNF397	-	237557
chr18	12090310	12090839	MER41_BT	LTR	+	chr18	11842193	11842194	XM_005218725.4	IRF8	+	248117
chr11	7482434	7482496	MER41_BT	LTR	-	chr11	7203276	7203277	XM_010809839.2	IL18RAP	+	279158
chr3	57598649	57598907	MER41_BT	LTR	+	chr3	57314452	57314453	NM_001077993.2	SH3GLB1	-	284197
chr20	39523068	39523383	MER41_BT	LTR	+	chr20	39227867	39227868	NM_001192490.1	RAD1	+	295201
chr1	152526602	152527177	MER41_BT	LTR	+	chr1	152827613	152827614	XM_010801755.3	ANKRD28	-	300437
chr14	63884586	63885173	MER41_BT	LTR	-	chr14	64211597	64211598	XM_025001876.1	SPAG1	-	326425
chr9	12621507	12622178	MER41_BT	LTR	-	chr9	12957912	12957913	XM_002690020.6	CGAS	-	335735
chr15	80490441	80490959	MER41_BT	LTR	-	chr15	80829368	80829369	NM_001098917.1	UBE2L6	-	338410
chr3	35415573	35415957	MER41_BT	LTR	+	chr3	35038504	35038505	NM_001099066.1	LOC534742	+	377069
chr25	3440871	3441527	MER41_BT	LTR	+	chr25	3820246	3820247	NM_001206229.1	ANKS3	-	378720
chr8	1119508	1119919	MER41_BT	LTR	+	chr8	702625	702626	XM_010807670.3	PALLD	+	416883
chr3	29512101	29512529	MER41_BT	LTR	+	chr3	29962036	29962037	NM_001192746.1	MAGI3	-	449508
chr6	105277223	105277999	MER41_BT	LTR	+	chr6	104813974	104813975	XM_024993118.1	ZBTB49	-	463249
chr4	70370013	70370267	MER41_BT	LTR	+	chr4	70844928	70844929	XM_005205541.4	OSBPL3	+	474662
chr14	42488723	42489161	MER41_BT	LTR	+	chr14	41996795	41996796	XM_005215504.4	IL7	-	491928
chr10	76567677	76567997	MER41_BT	LTR	-	chr10	76063061	76063062	XM_024997773.1	SYNE2	+	504616
chr13	16793819	16794308	MER41_BT	LTR	+	chr13	17320950	17320951	XM_025000350.1	PFKFB3	-	526643
chr24	43728484	43728747	MER41_BT	LTR	-	chr24	43196674	43196675	XM_005224132.4	SEH1L	+	531810
chr4	56663921	56664359	MER41_BT	LTR	+	chr4	56119690	56119691	XM_002686809.6	DOCK4	+	544231
chr9	33358663	33359118	MER41_BT	LTR	+	chr9	33924530	33924531	XM_005210746.4	ZUP1	+	565413
chr2	23386577	23387139	MER41_BT	LTR	+	chr2	22796755	22796756	XR_003030657.1	SP3	+	589822
chr26	18088735	18089029	MER41_BT	LTR	+	chr26	17481890	17481891	XM_002698407.4	ZNF518A	+	606845
chr20	38348037	38348619	MER41_BT	LTR	-	chr20	37652389	37652390	NM_174600.2	SLC1A3	-	695648
chr24	45943112	45943410	MER41_BT	LTR	-	chr24	46645273	46645274	XM_024984535.1	PIAS2	-	701864
chr21	15449740	15450279	MER41_BT	LTR	+	chr21	16215460	16215461	XM_024982293.1	AKAP13	+	765182
chr2	63109509	63110082	MER41_BT	LTR	+	chr2	62330067	62330068	XM_010802097.3	CCNT2	-	779442
chr13	42840939	42841225	MER41_BT	LTR	+	chr13	42059912	42059913	XM_025000586.1	NAPB	-	781027
chr3	16833019	16833093	MER41_BT	LTR	-	chr3	15944879	15944880	XM_024989938.1	ADAR	+	888140
chr21	15280115	15280989	MER41_BT	LTR	-	chr21	16215460	16215461	XM_024982293.1	AKAP13	+	934472
chr23	41361646	41362084	MER41_BT	LTR	-	chr23	40415586	40415587	XM_005223835.4	ATXN1	+	946060
chr24	26217287	26217678	MER41_BT	LTR	+	chr24	25259605	25259606	XM_024984433.1	TRAPPC8	+	957682
chr6	54645995	54646695	MER41_BT	LTR	+	chr6	55635281	55635282	XM_024993531.1	ARAP2	-	988587
chr1	57447611	57448249	MER41_BT	LTR	-	chr1	56425438	56425439	XM_005201351.4	PLCXD2	+	1022173
chr6	87498467	87498663	MER41_BT	LTR	+	chr6	86449494	86449495	XM_015471675.2	SLC4A4	+	1048973
chr27	35473896	35474326	MER41_BT	LTR	-	chr27	36576558	36576559	XM_010820356.3	ANK1	-	1102233
chr18	33989010	33989775	MER41_BT	LTR	+	chr18	35214540	35214541	NM_001046274.1	PARD6A	+	1224766
chr29	3814998	3815510	MER41_BT	LTR	+	chr29	5050499	5050500	NM_001045912.2	CHORDC1	+	1234990
chr10	84331123	84331614	MER41_BT	LTR	+	chr10	85640720	85640721	XM_024998141.1	ABCD4	-	1309107
chr9	21543663	21544108	MER41_BT	LTR	-	chr9	22963822	22963823	XM_024996933.1	DOPEY1	+	1419715
chr1	123684257	123684892	MER41_BT	LTR	-	chr1	122257745	122257746	XM_024991020.1	PLSCR4	+	1426512
chr29	49234242	49234678	MER41_BT	LTR	+	chr29	50695310	50695311	XM_024986946.1	IRF7	+	1460633
chr15	8233854	8234217	MER41_BT	LTR	+	chr15	6634447	6634448	XM_024975708.1	YAP1	-	1599407
chr2	84230141	84230932	MER41_BT	LTR	-	chr2	85877316	85877317	XM_015458620.2	ANKRD44	-	1646385
chr18	22390656	22391064	MER41_BT	LTR	+	chr18	24043330	24043331	NM_001075140.1	MT2A	-	1652267
chr2	104630255	104630547	MER41_BT	LTR	+	chr2	106298904	106298905	NM_001046583.2	PNKD	+	1668358
chr8	73100875	73101331	MER41_BT	LTR	+	chr8	74790616	74790617	NM_001015637.1	DNAJA1	+	1689286
chr24	19221611	19221946	MER41_BT	LTR	+	chr24	21006952	21006953	XM_005223983.4	SLC39A6	+	1785007
chr28	28390041	28390642	MER41_BT	LTR	+	chr28	26456500	26456501	NM_001075118.1	PPA1	-	1933541
chr29	31482416	31482601	MER41_BT	LTR	+	chr29	29396052	29396053	XM_010820942.3	CDON	-	2086364
chr4	85978950	85979631	MER41_BT	LTR	-	chr4	88070102	88070103	XM_010804401.2	WASL	-	2090472
chr13	25636247	25636482	MER41_BT	LTR	+	chr13	27854539	27854540	XM_002692097.6	MCM10	+	2218058
chr14	21551540	21552074	MER41_BT	LTR	-	chr14	23883120	23883121	NM_001046335.1	IMPAD1	-	2331047
chr7	40115436	40115974	MER41_BT	LTR	-	chr7	42612277	42612278	XM_024995086.1	ZNF672	+	2496304
chr29	9996556	9997103	MER41_BT	LTR	-	chr29	12505351	12505352	XM_024987550.1	PCF11	-	2508249
chr17	7665018	7665848	MER41_BT	LTR	+	chr17	10454873	10454874	NM_001099051.1	PRMT9	+	2789026
chr17	7639176	7639629	MER41_BT	LTR	+	chr17	10454873	10454874	NM_001099051.1	PRMT9	+	2815245
chr1	132825492	132825856	MER41_BT	LTR	-	chr1	135753523	135753524	XM_024991343.1	TOPBP1	+	2927668
chr29	32583627	32584023	MER41_BT	LTR	-	chr29	29396052	29396053	XM_010820942.3	CDON	-	3187575
chr4	4427593	4428435	MER41_BT	LTR	-	chr4	7697285	7697286	NM_001079785.1	C4H7orf57	-	3268851
chr6	116819816	116820016	MER41_BT	LTR	+	chr6	113292109	113292110	XM_024993666.1	KIAA0232	+	3527707
chr3	114219392	114219507	MER41_BT	LTR	-	chr3	110623043	110623044	XM_005204762.4	ZMYM1	-	3596349
chr14	49034776	49035269	MER41_BT	LTR	+	chr14	45276997	45276998	NM_001098056.2	TNFRSF11B	+	3757779
chr2	51316036	51316326	MER41_BT	LTR	-	chr2	47368947	47368948	XM_005202465.4	KIF5C	-	3947089
