# Supplementary material for: Ruminant-specific retrotransposons shape regulatory evolution of bovine immunity
Source: HighWire-hosted journal article supplement (doi:10.1101/gr.276241.121), 2022-08-01
Supplement: Supplemental_Table_S10.xlsx [file Supplemental_Table_S10.xlsx]

## Sheet: Description
Supplemental Table S10
Results from querying cattle IL2RB against cetartiodactyl assemblies using web-based TBLASTN
Predicted IL2RB-like orthologs using thresholds: E-value < 1e-25, query coverage <= 50%, percent identity >= 70%
Target assemblies include camelids (N=4), pig (N=1), whippomorphs (N=11), and pecorans (N=10)

## Sheet: tblastn results
Suborder	Species	IL2RB Query Cover	IL2RB E-value	IL2RB % Ident	IL2RB Accession	IL2RB Chr	IL2RB Start	IL2RB End	IL2RB Strand	IL2RB-like Query Cover	IL2RB-like E-value	IL2RB-like % Ident	IL2RB-like Accession	IL2RB-like Chr	IL2RB-like Start	IL2RB-like End	IL2RB-like Strand	IL2RB-like Distance From IL2RB End
Tylopoda	Camelus bactrianus	96	0	59.91	XM_010960352.2	NW_011514986.1	7418931	7437033	+	N/A	N/A	N/A	N/A	N/A	N/A	N/A	N/A	N/A
Tylopoda	Camelus dromedarius	96	0	60.06	XM_031463220.1	NC_044522.1	58257209	58275304	-	N/A	N/A	N/A	N/A	N/A	N/A	N/A	N/A	N/A
Tylopoda	Camelus ferus	96	0	60.06	XM_014550807.2	NC_045707.1	3111032	3129135	-	N/A	N/A	N/A	N/A	N/A	N/A	N/A	N/A	N/A
Tylopoda	Vicugna pacos	96	0	59.91	XM_015241602.2	NW_021969565.1	965838	984203	-	N/A	N/A	N/A	N/A	N/A	N/A	N/A	N/A	N/A
Suina	Sus scrofa	98	0	60.63	XM_013997538.2	chr5	10610094	10650315	+	N/A	N/A	N/A	N/A	N/A	N/A	N/A	N/A	N/A
Whippomorpha	Balaenoptera acutorostrata scammoni	94	0	62.58	XM_007165659.1	NW_006725354.1	684101	702858	+	N/A	N/A	N/A	N/A	N/A	N/A	N/A	N/A	N/A
Whippomorpha	Balaenoptera musculus	94	0	63.05	XM_036866374.1	chr10	93587767	93606548	-	N/A	N/A	N/A	N/A	N/A	N/A	N/A	N/A	N/A
Whippomorpha	Lipotes vexillifer	81	0	62.45	XM_007454111.1	NW_006780611.1	11281357	11294678	+	N/A	N/A	N/A	N/A	N/A	N/A	N/A	N/A	N/A
Whippomorpha	Phocoena sinus	97	0	63.28	XM_032646643.1	chr10	11001222	11019734	+	N/A	N/A	N/A	N/A	N/A	N/A	N/A	N/A	N/A
Whippomorpha	Neophocaena asiaeorientalis asiaeorientalis	97	0	56.57	XM_024761611.1	NW_020174935.1	600645	618883	-	N/A	N/A	N/A	N/A	N/A	N/A	N/A	N/A	N/A
Whippomorpha	Delphinapterus leucas	97	0	62.52	XM_022596858.1	NW_022098104.1	218789	237370	-	N/A	N/A	N/A	N/A	N/A	N/A	N/A	N/A	N/A
Whippomorpha	Monodon monoceros	95	0	62.97	XM_029206116.1	NW_021703783.1	89959433	8997840	-	N/A	N/A	N/A	N/A	N/A	N/A	N/A	N/A	N/A
Whippomorpha	Orcinus orca	95	0	64.4	XM_012536665.2	NW_004438525.1	777547	796146	-	N/A	N/A	N/A	N/A	N/A	N/A	N/A	N/A	N/A
Whippomorpha	Tursiops truncatas	95	0	64.5	XM_033866121.1	chr11	10836457	10854954	+	N/A	N/A	N/A	N/A	N/A	N/A	N/A	N/A	N/A
Whippomorpha	Globicephala melas	96	0	64.61	XM_030856068.1	NW_022134864.1	10776001	10794551	+	N/A	N/A	N/A	N/A	N/A	N/A	N/A	N/A	N/A
Whippomorpha	Lagenorhynchus obliquidens	97	0	63.28	XM_027107548.1	NW_020837952.1	54078088	54096663	-	N/A	N/A	N/A	N/A	N/A	N/A	N/A	N/A	N/A
Ruminantia	Bos taurus	100	0	85.42	XM_015471200.2	chr5	75550211	75567601	-	42	0	92.71	XM_010805353.2	chr5	75579089	75591455	-	23854
Ruminantia	Bison bison bison	73	0	82.46	XM_010860555.1	NW_011495029.1	1038938	1053270	-	15	5e-61	96.19	XM_010860556.1	NW_011495029.1	1060104	1078121	-	24851
Ruminantia	Bos mutus	90	0	75.41	XM_014478062.1	NW_005392915.1	898576	912739	+	42	0	91.32	XM_014478137.1	NW_005392915.1	873096	880006	+	-32733
Ruminantia	Bubalus bubalis	97	0	82.32	XM_025283506.3	chr4	44269255	44286293	+	42	0	90.62	XM_006056997.4	chr4	44243107	44252070	+	-34223
Ruminantia	Oryx dammah	90	0	76.64	XM_040236838.1	NW_024080622.1	5791323	5834025	+	N/A	N/A	N/A	N/A	N/A	N/A	N/A	N/A	N/A
Ruminantia	Capra hircus	96	0	72.6	XR_001918095.1	NC_030812.1	74223412	74240548	-	16	4e-44	72.81	XR_001295717.2	NC_030812.1	74266635	74267673	-	27125
Ruminantia	Ovis aries	95	0	71.54	XM_027967760.2	chr3	181171697	181193513	-	21	1e-72	81.82	XM_042247376.1	chr3	181209919	181215126	-	21613
Ruminantia	Cervus canadensis	96	0	75.61	XM_043440927.1	chr21	59248910	59276331	-	42	6e-168	83.5	XM_043440930.1	chr21	59280151	59305485	-	29154
Ruminantia	Cervus elaphus	96	0	76.63	XM_043881832.1	chr22	43213669	43243595	+	42	1e-167	83.5	XM_043881833.1	chr22	43187040	43212381	+	-31214
Ruminantia	Odocoileus virginianus taxanus	90	0	75.78	XM_020879728.1	NW_018341064.1	2378706	2390497	-	49	0	84.85	XM_020872810.1	NW_018338416.1	3832	19683	+	-2370814
