# Supplementary material for: Ruminant-specific retrotransposons shape regulatory evolution of bovine immunity
Source: HighWire-hosted journal article supplement (doi:10.1101/gr.276241.121), 2022-08-01
Supplement: Supplemental_Table_S11.xlsx [file Supplemental_Table_S11.xlsx]

## Sheet: Description
Supplemental Table S11
Alignment statistics and DESeq2 results from MER41_BT.IL2RB and MER41_BT.IFNAR2 deletions in MDBK cells.
For more information see Supplemental Methods
Sheets
Alignment summary	Alignment statistics for each sample
MER41_BT.IL2RB	DESeq2 output for IFNG-stimulated MDBK
MER41_BT.IFNAR2	DESeq2 output for IFNG-stimulated BL3.1
Description of "Alignment summary" columns:
Sample	Sample name
Number of reads	Number of reads
Number of total aligned fragments	Number of aligned fragments after removing fragments with QUAL < 10
Number of fragments assigned to complete RefSeq	Number of fragments assigned to complete RefSeq using featureCounts v1.6.2
RNA-seq data sources
	Accession
MDBK	GSE185082

## Sheet: Alignment summary
Sample	Number of reads	Number of aligned fragments post-filter	Number of fragments assigned to complete RefSeq
Cas12 control BSA rep1	15741716	14007181	12141501
Cas12 control BSA rep2	15786680	14132027	12368081
Cas12 MER41 IFNAR2 control BSA rep1	25735583	18444018	17738735
Cas12 MER41 IFNAR2 control BSA rep2	25451328	19622891	20575767
Cas12 control IFNG 4h rep1	36582403	32665162	28511990
Cas12 control IFNG 4h rep2	26981553	23911831	20740269
Cas12 MER41 control IFNAR2 IFNG 4h rep1	21560393	21237377	19945074
Cas12 MER41 control IFNAR2 IFNG 4h rep2	26480894	22979331	19916976
Cas12 MER41 IFNAR2 KO2 BSA rep1	21760006	23592325	17536253
Cas12 MER41 IFNAR2 KO2 BSA rep2	18987813	20268104	16381419
Cas12 MER41 IFNAR2 KO3 BSA rep1	22179193	18907856	17645321
Cas12 MER41 IFNAR2 KO3 BSA rep2	20798913	19575375	17816245
Cas12 MER41 IFNAR2 KO2 IFNG 4h rep1	22512469	22828768	17047807
Cas12 MER41 IFNAR2 KO2 IFNG 4h rep2	21159989	19505469	15128052
Cas12 MER41 IFNAR2 KO3 IFNG 4h rep1	21706637	17081844	16500211
Cas12 MER41 IFNAR2 KO3 IFNG 4h rep2	24135630	19516737	16015232
Cas12 MER41 IL2RB KO1 UT rep1	17894874	15696010	14339428
Cas12 MER41 IL2RB KO2 UT rep1	18280278	15854368	14059654
Cas12 MER41 IL2RB KO3 UT rep1	22386358	19711795	17283345
Cas12 MER41 IL2RB KO1 IFNG 4h rep1	19536374	17123797	15117892
Cas12 MER41 IL2RB KO2 IFNG 4h rep1	16136542	14155422	12561731
Cas12 MER41 IL2RB KO3 IFNG 4h rep1	19253917	17004874	15039228

## Sheet: MER41_BT.IL2RB
gene	baseMean	log2FoldChange	lfcSE	stat	pvalue	padj	MDBK_Cas12_ctrl_BSA_R1	MDBK_Cas12_ctrl_BSA_R2	MDBK_Cas12_MER41_IFNAR2_ctrl_BSA_R1	MDBK_Cas12_MER41_IFNAR2_ctrl_BSA_R2	MDBK_Cas12_ctrl_IFNG_4h_R1	MDBK_Cas12_ctrl_IFNG_4h_R2	MDBK_Cas12_MER41_IFNAR2_ctrl_IFNG_4h_R1	MDBK_Cas12_MER41_IFNAR2_ctrl_IFNG_4h_R2	MDBK_Cas12_MER41_IFNAR2_KO2_BSA_R1	MDBK_Cas12_MER41_IFNAR2_KO2_BSA_R2	MDBK_Cas12_MER41_IFNAR2_KO3_BSA_R1	MDBK_Cas12_MER41_IFNAR2_KO3_BSA_R2	MDBK_Cas12_MER41_IFNAR2_KO2_IFNG_4h_R1	MDBK_Cas12_MER41_IFNAR2_KO2_IFNG_4h_R2	MDBK_Cas12_MER41_IFNAR2_KO3_IFNG_4h_R1	MDBK_Cas12_MER41_IFNAR2_KO3_IFNG_4h_R2
BLA-DQB	380.898	2.69252	0.166962	16.1265	1.66042e-58	2.5064e-54	46.8201	53.1894	53.7604	56.4221	165.189	137.194	135.249	133.396	609.832	447.408	719.003	986.855	785.901	1002.36
GPRC5C	333.28	1.7991	0.122673	14.6659	1.06627e-48	8.04765e-45	195.307	184.833	176.513	170.061	138.417	137.194	151.743	143.216	622.683	546.962	713.053	546.09	440.999	498.854
BOLA-DQA2	147.372	3.55026	0.267824	13.256	4.16691e-40	2.09665e-36	12.0395	14.6271	11.6481	22.251	37.0252	29.8599	28.0395	27.8249	325.945	199.108	270.742	435.04	240.904	408.153
LOC100848815	606.25	2.40638	0.182622	13.1769	1.19242e-39	4.49989e-36	89.627	85.103	129.025	104.103	287.658	259.054	245.758	284.796	1011.71	669.94	1036.36	1597.06	1116.32	1570.98
LIMCH1	788.03	2.68461	0.211038	12.721	4.52044e-37	1.36472e-33	189.956	184.833	249.09	270.985	203.924	194.493	260.603	252.06	1419.44	1311.77	2106.43	1247.88	1257.18	1883.78
CST3	835.414	2.21431	0.177972	12.4419	1.54838e-35	3.89546e-32	444.122	351.05	282.242	284.494	370.822	348.634	287.817	323.259	1535.1	1186.45	1648.25	1664.6	1247.96	1720.99
NTN4	8341.2	0.84714	0.0686768	12.3352	5.85612e-35	1.26283e-31	6430.4	6348.16	6797.11	6836.61	5547.52	5642.71	5952.62	5974.98	12023.7	11271.9	12766.5	10090.6	9749.38	11344.6
DKK3	2914.83	1.93001	0.157499	12.2541	1.5979e-34	3.01504e-31	1743.04	1401.54	1274.12	1305.65	1383.6	1307.38	1210.65	1160.46	4615.8	4573.63	6361.94	4237.07	4363.92	5868.8
IDH1	2087.65	0.823166	0.0679738	12.11	9.34401e-34	1.5672e-30	1569.14	1638.23	1528.59	1508.3	1638.79	1660.05	1531.45	1577.83	2805	2479.48	2787.75	2931.94	2626.25	2944.28
BOLA-DRA	1259.73	3.44249	0.285363	12.0635	1.64548e-33	2.48385e-30	53.5087	53.1894	114.689	119.996	336.075	242.914	317.506	333.898	1684.63	1551.87	2793.7	2954.84	2692.07	4387.35
SERPINB1	1612.93	0.621882	0.0522464	11.9029	1.14338e-32	1.56903e-29	1356.44	1324.42	1352.97	1300.89	1352.84	1300.92	1366.51	1387.15	1843.52	1782.6	1972.55	2114.53	2062.82	2062.86
BOLA-DRB3	1438.24	2.28182	0.19737	11.5611	6.48648e-31	8.15945e-28	309.013	313.817	259.842	253.502	921.074	725.514	544.297	511.486	2060.81	1783.77	2586.43	3321.19	2811.87	3732.68
ZCWPW1	835.366	-1.05138	0.0961069	-10.9397	7.44199e-28	8.64129e-25	1087.56	1078.42	997.256	1032.29	1143.23	1105.62	1084.47	1042.61	484.829	571.557	479.997	492.283	614.766	480.248
ID1	712.678	1.14626	0.104908	10.9264	8.62271e-28	9.29713e-25	263.53	316.477	321.667	274.958	592.404	572.18	556.667	569.591	768.716	893.644	1042.31	1212.39	1324.31	1268.65
PRAG1	417.49	2.93151	0.268918	10.9012	1.13795e-27	1.14516e-24	97.6533	90.422	133.505	121.586	96.8352	109.755	150.919	154.673	489.502	631.29	843.961	613.636	951.769	1359.35
LTBP2	1804.62	0.51863	0.0477553	10.8602	1.78451e-27	1.68358e-24	1496.91	1543.82	1499.02	1487.64	1462.78	1543.03	1480.32	1413.34	2296.8	2347.13	2356.35	2067.59	2103.63	2166.35
IGFBP2	13970.6	0.920668	0.0885143	10.4014	2.44431e-25	2.1704e-22	11434.8	9873.28	9813.07	9845.26	11302.9	9376	9718.17	9612.67	18589.4	20302	18908.3	18255.7	20662.5	17894.8
PLAT	951.314	2.53136	0.244482	10.354	4.01405e-25	3.36623e-22	338.442	277.915	364.675	317.871	270.569	258.247	369.462	361.723	1377.38	1515.56	2406.92	1275.36	1598.13	2586.13
BOLA-DRB2	47.3462	2.45852	0.241593	10.1763	2.5311e-24	2.0109e-21	9.36402	6.64868	7.16806	4.76806	22.7848	16.9475	14.8445	18.0043	75.937	94.8692	88.2638	98.4565	90.8327	113.957
SESN3	887.536	2.46931	0.245937	10.0404	1.01222e-23	7.63976e-21	367.872	315.147	284.93	206.616	295.063	336.529	187.205	220.144	1702.16	1670.17	2521.97	1286.8	1161.08	1869.83
VWA1	619.563	1.65539	0.165428	10.0067	1.42371e-23	1.02338e-20	367.872	277.915	337.795	331.38	283.67	307.476	341.422	373.18	778.062	977.972	1215.86	887.254	984.679	1209.34
FOS	851.501	2.34099	0.237549	9.85478	6.5358e-23	4.48445e-20	339.78	252.65	275.97	270.19	291.075	309.09	283.694	324.896	1375.04	1199.33	2407.92	1540.96	1049.18	2001.23
MGAT5B	89.6087	2.59453	0.264739	9.80033	1.12219e-22	7.36501e-20	17.3903	29.2542	25.9842	35.7605	19.9367	29.8599	34.6371	26.1881	202.109	133.52	204.296	159.133	132.958	203.495
RAPGEF3	197.114	1.57344	0.160638	9.79492	1.18394e-22	7.44649e-20	132.434	109.038	107.521	88.2092	96.2656	104.106	88.242	111.299	299.075	340.826	390.741	258.735	293.561	339.546
CRISPLD2	117.578	2.12142	0.217673	9.7459	1.9207e-22	1.11512e-19	44.1447	62.4976	65.4085	51.654	47.2784	48.4214	40.4099	49.1027	205.614	163.971	263.8	227.824	152.704	223.263
SERF1A	214.842	2.23207	0.228968	9.74838	1.87438e-22	1.11512e-19	77.5876	82.4436	88.7047	84.2358	75.1897	65.3689	78.3457	106.389	394.872	296.32	514.707	373.219	284.346	486.063
FAM189B	1362.11	0.632045	0.0665382	9.49897	2.11983e-21	1.18514e-18	1100.94	1128.95	1221.26	1157.84	1038.98	1012.01	1174.36	1128.54	1630.89	1695.93	1723.62	1688.64	1674.48	1693.08
ADGRG6	712.263	1.35745	0.143809	9.4393	3.75289e-21	2.02321e-18	425.394	347.061	514.308	531.639	352.594	377.687	444.509	424.738	1219.66	1068.16	1196.02	961.668	957.035	1151.2
CHPF	746.774	1.61472	0.171336	9.42427	4.33103e-21	2.25438e-18	478.903	428.175	397.827	361.578	427.214	413.196	349.669	377.272	1315.46	919.411	1385.44	1300.54	917.542	1382.6
CHSY3	44.9993	2.92235	0.313644	9.31739	1.19237e-20	5.9996e-18	9.36402	9.30815	21.5042	19.0723	8.54428	7.26321	15.6691	15.5492	81.7783	97.2116	81.3217	73.27	94.782	95.352
ACY1	420.51	1.32492	0.142988	9.26594	1.9337e-20	9.41587e-18	275.57	247.331	310.018	249.529	221.012	239.686	282.045	256.971	593.477	568.044	769.581	626.229	547.629	700.023
BOLA-DQA5	110.47	3.0591	0.332386	9.20345	3.46652e-20	1.63522e-17	0	10.6379	12.5441	11.9202	48.9872	32.2809	23.0914	31.9167	195.1	126.492	195.371	381.233	201.412	275.591
GAL3ST3	138.049	1.4464	0.15731	9.19458	3.76477e-20	1.7221e-17	115.044	115.687	124.545	93.7719	58.6707	48.4214	61.0272	73.654	233.652	254.156	260.825	163.713	163.236	166.285
ACPP	56.3906	3.47893	0.381236	9.12539	7.14756e-20	3.17331e-17	5.35087	6.64868	8.96007	13.5095	10.2531	5.64916	11.5457	9.82054	120.331	99.5541	185.453	84.7184	77.6686	150.005
GJA1	55.0927	2.29033	0.251145	9.11954	7.54456e-20	3.25386e-17	13.3772	3.98921	12.5441	5.56274	32.4683	31.4739	18.9679	24.5513	80.61	80.8145	69.421	115.629	123.743	158.145
LOC112441463	62.9181	2.78899	0.308551	9.03898	1.58141e-19	6.45173e-17	8.0263	7.97841	7.16806	1.58935	24.4936	24.2107	18.1432	19.6411	130.845	76.1296	113.057	188.899	101.364	159.308
MAMDC2	1461.04	1.72634	0.190982	9.03927	1.57722e-19	6.45173e-17	587.258	599.711	806.406	801.035	663.036	635.127	805.724	810.194	2377.41	2018.02	3121.96	2314.87	1900.91	3012.89
CRYAB	5148.24	1.4261	0.158157	9.017	1.93307e-19	7.56226e-17	3360.34	3386.84	2880.66	2907.72	2976.83	3111.88	2897.97	2983.81	7170.79	6396.06	9878.61	7536.5	6564.97	10022.4
RAB3IP	347.253	1.26307	0.140095	9.01583	1.95381e-19	7.56226e-17	262.192	238.023	281.346	247.145	184.557	213.861	214.42	224.236	526.886	425.154	541.484	467.096	430.468	604.671
PHF10	507.726	-0.830903	0.0922491	-9.00717	2.11446e-19	7.97946e-17	638.091	647.581	608.389	612.696	599.239	589.127	605.324	592.506	387.863	445.065	373.882	338.874	376.495	293.033
LFNG	1159.72	0.715633	0.080118	8.93224	4.17456e-19	1.53695e-16	1210.63	1150.22	1075.21	998.115	831.074	794.918	766.963	816.741	1653.09	1519.08	1463.79	1347.48	1359.86	1248.88
NCAPH2	1009.98	-0.834403	0.0946671	-8.81408	1.20669e-18	4.3369e-16	1273.51	1218.04	1318.92	1180.89	1236.64	1210.53	1248.58	1270.12	676.423	795.261	620.822	728.12	749.041	612.811
YPEL2	1131.32	1.06296	0.120858	8.79516	1.42844e-18	5.0145e-16	738.42	667.527	885.255	846.331	766.137	784.427	776.86	850.295	1276.91	1534.3	1734.53	1591.33	1574.43	1811.69
MAST4	225.144	1.0699	0.122171	8.75733	1.99921e-18	6.85866e-16	113.706	111.698	120.961	131.916	168.607	173.51	159.99	187.409	255.849	323.258	320.328	334.294	352.8	397.688
NOL9	1475.46	-0.51075	0.058379	-8.74887	2.15493e-18	7.22859e-16	1559.78	1619.62	1439.88	1538.5	1837.02	1798.05	1778.86	1770.97	1210.32	1171.22	1149.41	1324.58	1255.86	1202.37
PTPRF	4045.15	1.037	0.118845	8.72564	2.64682e-18	8.68559e-16	3371.05	3115.57	2664.73	2624.82	2883.98	2983.57	2535.93	2519.79	5659.06	5158.07	6304.42	5573.1	4977.37	6260.67
GDF15	191.671	2.01772	0.232142	8.69176	3.56864e-18	1.14614e-15	60.1973	73.1354	62.7205	61.9848	93.4175	97.6498	63.5013	65.4702	344.637	292.806	493.881	337.729	240.904	395.362
SIDT2	399.681	1.02271	0.117995	8.66745	4.41887e-18	1.36128e-15	243.464	267.277	286.722	282.905	275.126	288.107	285.343	284.796	588.804	479.031	590.078	590.739	483.125	650.021
ABHD2	2439.54	0.785556	0.0906318	8.66756	4.41495e-18	1.36128e-15	1846.05	1909.5	1984.66	1997.02	1849.55	2096.65	1788.76	1860.17	3007.1	2755.89	3242.95	3595.95	2884.27	3334.99
HSP90AB1	46110.2	-0.279627	0.0323022	-8.6566	4.86054e-18	1.44291e-15	49388.5	52129.6	50860.1	51080.3	48309.9	48797.5	50693.8	49732.8	40767.7	41577.3	40159.1	40163.4	41297.3	40585.1
ABHD8	759.705	0.882103	0.101904	8.65626	4.87501e-18	1.44291e-15	696.95	586.413	572.549	539.586	553.1	531.021	534.4	559.771	1087.65	895.987	1068.09	1004.03	930.706	1075.62
TUBA1D	81.5599	2.77719	0.323142	8.59434	8.37467e-18	2.43107e-15	21.4035	14.6271	23.2962	27.8137	17.0886	22.5967	30.5136	29.4616	120.331	108.924	218.18	144.25	134.274	229.077
MMP28	770.041	0.653138	0.076327	8.5571	1.15745e-17	3.29656e-15	687.586	623.646	689.03	654.019	558.796	591.548	624.292	606.418	976.667	933.466	1033.38	960.524	860.936	980.265
LAMA5	17615.3	0.709316	0.0832234	8.52304	1.55417e-17	4.34449e-15	14150.4	13335.9	15242	14243	12609.1	12487.1	14089	14748.8	24937.7	21294	23344.3	23345.6	20904.7	21882.1
PNPLA2	215.833	1.7015	0.199891	8.51214	1.70758e-17	4.68653e-15	136.447	113.027	122.753	104.103	102.531	92.0007	112.158	94.9318	446.276	282.265	436.361	321.701	250.119	406.99
VWF	1550.81	0.909401	0.107431	8.46502	2.56116e-17	6.90371e-15	1289.56	1188.78	1223.95	1141.95	1027.02	1188.75	993.753	1110.54	2246.57	1855.22	2363.29	2155.74	1767.95	2158.21
CIB2	693.756	0.953298	0.112747	8.4552	2.78602e-17	7.37806e-15	599.297	553.17	560.9	510.183	502.973	453.547	443.684	468.931	977.835	828.056	1098.84	937.627	793.799	983.753
CDKN1A	3278.96	1.45431	0.172208	8.44507	3.03855e-17	7.8057e-15	2369.1	2417.46	1955.09	2026.43	1791.45	1856.96	1611.45	1628.57	5190.59	4262.08	6639.62	4364.14	3730.72	6061.83
DGKA	586.444	1.13229	0.134085	8.4446	3.05092e-17	7.8057e-15	420.043	380.304	376.323	417.206	413.543	380.108	406.573	355.994	765.211	721.474	1014.54	827.722	745.092	986.079
ITGB3	6596.68	0.928132	0.110212	8.42133	3.7222e-17	9.36444e-15	5243.85	5263.09	4936.1	4775.22	4599.1	4470.91	4347.77	4701.58	9591.43	7794.5	10773.1	8814.15	7466.71	9575.9
LAMC1	20318.9	0.698019	0.0832754	8.38205	5.20122e-17	1.24814e-14	15441.3	15560.6	17013.4	17231.8	15204.3	14999.3	16013	16185.1	28691.3	23702.1	28502.3	26186	23187.4	26547.4
CDC42BPG	120.298	2.02628	0.241677	8.38424	5.10555e-17	1.24814e-14	57.5218	53.1894	44.8004	55.6274	52.4049	51.6495	37.1111	54.0129	186.922	194.423	299.502	164.857	165.868	266.288
LOC104976804	2846.97	-1.23037	0.14679	-8.38187	5.20921e-17	1.24814e-14	3581.07	3026.48	3691.55	4032.19	4410.56	3190.16	3934.6	3649.97	1871.55	1553.04	2062.8	1915.32	1444.11	1494.24
GLIS2	484.855	0.817321	0.0977221	8.36373	6.07673e-17	1.4112e-14	421.381	464.078	479.364	442.635	283.67	343.792	291.116	315.894	702.125	650.029	766.606	544.945	516.035	566.298
RASL11B	510.266	2.12142	0.253621	8.36455	6.03458e-17	1.4112e-14	299.649	271.266	312.707	325.023	122.468	129.931	148.445	186.59	1341.16	788.234	1305.11	854.053	376.495	682.581
P3H2	1617.36	0.606899	0.0726596	8.35264	6.67565e-17	1.5268e-14	1284.21	1276.55	1367.31	1370.02	1307.28	1281.55	1354.97	1301.22	2254.74	1964.14	1888.25	1976	2116.8	1900.06
EGLN3	1787.43	2.45872	0.294852	8.33882	7.50368e-17	1.69057e-14	432.083	410.888	393.347	381.445	764.998	856.252	699.339	806.921	1613.37	1841.16	3930.22	2886.15	3313.42	6694.41
MMP1	95.5857	2.46266	0.29593	8.32176	8.66693e-17	1.92393e-14	8.0263	13.2974	15.2321	11.9202	43.8607	44.3863	37.1111	34.3719	186.922	100.725	181.486	311.397	144.806	204.658
FADD	825.326	0.883698	0.106384	8.30666	9.84307e-17	2.15335e-14	639.429	607.689	699.782	668.324	520.632	516.495	625.116	653.884	1057.28	1111.49	1254.54	1121.95	996.527	1081.43
COL6A1	13911.5	1.29189	0.155604	8.30237	1.02056e-16	2.20077e-14	8379.46	7858.73	9273.67	9306.46	8258.33	7987.11	8997.39	9084.81	23935.3	16141.8	22503.3	24758.4	15983.9	22292.6
ELOVL4	238.51	1.19247	0.145037	8.22187	2.00356e-16	4.25969e-14	131.096	170.206	179.201	150.989	157.215	142.843	164.114	152.218	371.507	290.464	373.882	367.495	294.877	393.036
KCNH7	24.0119	5.15264	0.629072	8.19086	2.59375e-16	5.43787e-14	0	2.65947	0	0	3.41771	1.61405	0	0	52.5718	55.0475	67.4375	35.4901	53.9731	63.9556
TMEM62	283.101	0.958318	0.117683	8.14322	3.84904e-16	7.95908e-14	172.565	195.471	178.305	185.954	206.202	221.931	197.101	196.411	375.012	382.99	454.212	357.191	383.077	456.992
ITGB4	34.948	4.98551	0.612523	8.13931	3.97546e-16	8.10939e-14	0	0	1.79201	0.794677	3.41771	0.807023	1.64938	1.63676	87.6196	59.7324	143.801	49.2283	43.4417	95.352
ACSF2	1078.25	1.18321	0.145619	8.12543	4.45789e-16	8.97224e-14	737.082	696.781	654.981	659.582	746.201	692.426	689.442	694.803	1550.28	1276.63	1890.23	1677.2	1251.91	1877.97
GADD45A	583.873	0.938724	0.115612	8.11962	4.67638e-16	9.28816e-14	581.907	441.472	456.068	506.209	430.062	389.792	419.768	446.016	683.433	641.831	755.697	896.412	706.916	818.632
CYP4F2	24.8379	4.01497	0.49629	8.08995	5.96873e-16	1.1701e-13	0	2.65947	2.68802	3.97339	2.27848	4.03512	3.29877	4.09189	81.7783	33.9655	46.6112	54.9525	43.4417	63.9556
GPR137B	958.818	1.25644	0.156668	8.01979	1.05923e-15	2.04988e-13	635.415	675.505	757.126	746.997	428.923	514.074	534.4	618.694	1343.5	1657.28	1759.33	984.565	1296.67	1470.98
LOC100847802	511.845	-0.869537	0.108576	-8.00854	1.16081e-15	2.19031e-13	647.455	591.732	648.709	619.848	681.264	571.373	612.746	634.243	428.752	368.936	333.221	369.784	355.432	302.336
HSD3B1	6266.52	0.816711	0.101977	8.00881	1.15825e-15	2.19031e-13	6331.41	6114.12	6198.58	6422.58	3717.33	3281.36	3904.92	3915.12	9599.6	8403.53	10269.3	6707.64	5582.92	7282.8
CYCS	2586.26	-0.373213	0.0467597	-7.9815	1.44564e-15	2.69407e-13	2894.82	2990.57	2817.94	2727.33	2919.3	2944.83	2839.41	2838.13	2160.12	2180.82	2211.55	2210.69	2181.3	2290.77
CDH17	13819.6	2.00803	0.252496	7.95272	1.82465e-15	3.35892e-13	4763.61	4522.43	6454.84	6355.03	5358.41	5304.56	6708.87	6917.75	20150.2	18113	35552.5	20074.8	18586.5	34611.6
ADHFE1	305.138	1.02536	0.129059	7.94489	1.94369e-15	3.53494e-13	234.1	238.023	215.938	235.224	198.227	205.791	208.647	186.59	474.314	380.648	476.03	385.812	348.85	483.737
LIG1	820.583	-0.913453	0.11563	-7.89981	2.79335e-15	5.01972e-13	1163.81	1091.71	1033.99	1031.49	1059.49	997.481	979.734	965.686	579.458	550.475	439.336	570.132	585.805	439.549
NEDD9	2378.1	0.669485	0.0847671	7.89793	2.83574e-15	5.03595e-13	1530.35	1476.01	1430.92	1432.8	2009.62	2195.1	2069.15	2180.16	3400.81	2607.15	2879.98	3505.51	3259.45	3316.39
LLGL2	303.641	1.71862	0.217798	7.89091	3e-15	5.2657e-13	195.307	176.855	170.241	150.989	160.633	154.141	141.847	121.12	426.415	422.812	703.135	381.233	415.988	630.253
PTPRG	605.443	0.677368	0.085888	7.88664	3.10433e-15	5.38619e-13	505.657	530.564	450.692	464.091	498.986	514.074	465.951	460.747	743.014	703.906	811.234	767.045	745.092	815.143
CTSV	12775.8	1.25263	0.158998	7.87829	3.31888e-15	5.69301e-13	7948.71	7616.72	8842.69	8522.91	7319.6	7305.98	8552.88	8664.17	18408.3	15359.4	23418.7	18506.4	14978.2	23417.1
USP7	4358.39	-0.310432	0.0394931	-7.86041	3.82883e-15	6.49396e-13	4664.62	4979.86	4749.73	4725.15	4768.85	4782.42	4652.91	4708.13	3712.73	3954.05	3880.63	3839.8	3783.38	3815.24
PAPSS2	2570.85	1.27561	0.162359	7.85671	3.94354e-15	6.61419e-13	1262.8	1380.27	1802.77	1671.21	1433.73	1566.43	1760.72	1813.53	3308.52	3590.97	4466.75	3445.98	3604.35	4883.88
IL18	49.1727	2.27735	0.29032	7.84427	4.3547e-15	7.22354e-13	14.7149	19.946	15.2321	17.4829	18.7974	23.4037	14.0198	21.2778	92.2927	76.1296	94.2142	135.092	73.7193	72.0954
FAM160B2	574.159	0.893174	0.114969	7.7688	7.92322e-15	1.30001e-12	476.227	517.267	474.884	468.065	348.037	391.406	369.462	364.997	879.701	724.988	973.877	726.976	589.755	732.582
PDPN	4639.35	1.02801	0.133006	7.72902	1.08375e-14	1.75905e-12	2633.96	2755.21	3463.96	3239.9	2879.99	3228.09	3421.65	3474.01	6482.68	5740.17	7747.38	6373.34	5937.04	7573.51
GBGT1	393.692	1.146	0.148511	7.71658	1.19488e-14	1.8986e-12	354.495	337.753	317.187	305.951	226.139	235.651	249.057	225.054	588.804	452.093	668.425	511.745	426.519	612.811
C4H7orf57	523.405	0.660436	0.0855788	7.71729	1.18833e-14	1.8986e-12	393.289	408.229	408.579	346.479	474.493	460.003	437.911	453.381	635.534	544.619	599.996	757.886	689.802	717.466
B3GAT3	579.592	0.716041	0.0928687	7.71024	1.25577e-14	1.97457e-12	502.981	472.056	459.652	460.118	429.493	421.266	474.198	484.48	743.014	686.337	756.689	809.404	652.943	761.653
LASP1	7865.9	0.485982	0.0633814	7.66757	1.75282e-14	2.72771e-12	6984.22	6856.11	6996.92	6941.51	6218.53	6695.07	6908.44	6876.83	9509.65	8627.24	9472.99	9744.91	8581.72	9708.46
FUCA2	786.201	0.773152	0.100957	7.65825	1.8849e-14	2.90332e-12	607.323	587.743	637.061	634.152	596.391	560.074	607.798	594.142	1127.37	891.302	1142.47	1079.59	892.53	1048.87
LOC112441494	24.4451	5.22173	0.684852	7.62461	2.44777e-14	3.71951e-12	1.33772	3.98921	0.896007	4.76806	2.27848	0.807023	0.824692	1.63676	66.5909	66.7598	29.7519	67.5458	67.1372	27.9079
ATP2B2	184.395	1.80567	0.236849	7.62375	2.46407e-14	3.71951e-12	136.447	123.665	89.6007	74.6997	90.5694	91.1936	81.6445	72.0173	258.186	267.039	416.526	289.645	235.639	354.663
NUDT22	137.367	0.993332	0.130361	7.61984	2.53983e-14	3.79591e-12	117.719	101.06	100.353	96.9506	91.7086	89.5796	102.262	99.8421	185.754	182.711	184.461	178.596	181.665	210.472
SCRN1	520.37	1.44936	0.190718	7.59952	2.97226e-14	4.39865e-12	353.157	301.85	363.779	345.685	234.113	267.125	300.188	317.531	752.36	674.625	1086.93	737.279	592.387	958.171
CYS1	239.603	0.889902	0.117192	7.59357	3.11221e-14	4.56105e-12	226.074	202.12	203.394	172.445	165.759	166.247	159.165	159.584	290.897	339.655	363.964	304.528	304.092	296.521
RSRP1	208.694	-1.1475	0.151182	-7.59018	3.19456e-14	4.63673e-12	204.671	267.277	286.722	259.065	270.569	254.212	310.909	271.701	130.845	148.745	140.825	115.629	150.071	110.469
BMP7	238.898	2.54315	0.335321	7.58424	3.34454e-14	4.80818e-12	89.627	98.4004	98.5608	70.7263	68.3543	70.211	67.6247	78.5643	300.243	367.764	790.408	262.169	333.053	648.859
DDX23	2847.05	-0.541838	0.0716558	-7.56168	3.97902e-14	5.66634e-12	3268.04	3268.49	3312.54	3243.87	3314.61	3166.76	3361.44	3379.9	2302.64	2415.06	2010.23	2208.4	2468.28	2138.44
LOC521224	84.1764	2.95513	0.39105	7.55692	4.1272e-14	5.82244e-12	18.728	27.9244	19.7122	13.5095	17.0886	30.6669	17.3185	25.3697	114.49	114.78	255.866	192.334	93.4656	237.217
ARHGAP27	1614.11	0.76539	0.101602	7.53322	4.95023e-14	6.91887e-12	1344.41	1203.41	1301	1203.94	1261.71	1300.11	1293.94	1415.79	1668.28	1810.71	2075.69	1997.75	2160.24	2560.55
OTUD7B	1830.27	0.683033	0.0911827	7.49081	6.84477e-14	9.47906e-12	1412.63	1452.07	1444.36	1481.28	1398.41	1463.13	1584.23	1475.54	2151.94	2089.46	2542.79	2113.38	2385.35	2629.16
TES	2033.47	0.585786	0.0782766	7.48354	7.23473e-14	9.92802e-12	1718.97	1872.27	1778.57	1839.68	1492.4	1583.38	1607.32	1519.73	2658.96	2461.91	2956.34	2199.24	2237.91	2541.94
PTPN21	1748.44	0.721073	0.0963741	7.48202	7.31881e-14	9.95292e-12	1236.05	1311.12	1354.76	1538.5	1330.63	1371.13	1399.5	1354.42	2151.94	2141	2545.77	2076.75	2174.72	2491.94
EPCAM	448.826	3.63609	0.486502	7.47394	7.7831e-14	1.0397e-11	103.004	139.622	78.8486	54.038	78.6074	92.8077	57.7284	54.8313	939.282	470.832	1564.95	882.674	418.62	1347.72
TSPO	1819.8	0.860874	0.115183	7.47399	7.77981e-14	1.0397e-11	1506.27	1441.43	1356.55	1238.11	1267.4	1355.8	1348.37	1338.87	2309.65	2237.04	2847.25	2285.11	2131.28	2814.05
SERINC2	215.068	2.50042	0.334921	7.46572	8.28434e-14	1.09695e-11	112.368	85.103	73.4726	47.6806	76.8986	97.6498	56.9037	62.1967	366.834	240.101	545.451	432.751	255.385	558.158
CTNNA1	10358	0.446161	0.0598103	7.4596	8.67845e-14	1.13914e-11	8954.68	9119.32	8960.07	8994.95	8844.47	9202.49	8950.38	9029.16	12192	11131.3	12826	12516.6	11350.1	12940
C15H11orf52	55.5638	1.55582	0.209113	7.4401	1.00608e-13	1.29802e-11	32.1052	30.5839	39.4243	27.8137	34.7468	26.6318	27.2148	30.28	74.7687	94.8692	95.2059	89.2978	84.2506	90.7007
PSAP	17840.8	0.918193	0.12341	7.44018	1.00548e-13	1.29802e-11	12181.2	10778.8	12861.3	12958	13657.8	11867.3	14116.2	14245.5	22893.3	20235.2	27603.8	25081.2	22300.1	28991.7
PTTG1IP	3478.13	0.838695	0.112875	7.43028	1.0837e-13	1.38631e-11	2777.1	2715.32	2798.23	2689.98	2477.84	2538.09	2568.91	2471.5	4786.37	4040.72	5343.43	4314.91	3828.14	5343.2
LOC100139115	918.901	0.662153	0.0893823	7.4081	1.28125e-13	1.62525e-11	791.928	801.83	749.958	707.263	754.175	754.567	696.04	680.072	1080.64	1141.94	1281.31	1091.04	1076.83	1257.02
ATG4D	297.464	0.959802	0.129723	7.39883	1.37385e-13	1.72819e-11	219.386	204.779	218.626	224.894	209.62	209.826	218.543	214.415	344.637	379.477	478.013	377.798	383.077	481.411
PLEKHS1	29.7495	4.29021	0.581441	7.37859	1.5998e-13	1.99578e-11	2.67543	0	2.68802	3.97339	1.70886	3.22809	0.824692	5.72865	71.2639	53.8763	106.115	48.0834	30.2776	86.0494
EPHA2	2821.72	0.969088	0.131739	7.35614	1.8931e-13	2.34232e-11	2098.88	1968.01	2250.77	2303.77	1834.17	1699.59	1941.32	1918.28	3817.88	4175.41	4641.29	2856.38	3541.16	4457.12
C8H9orf3	1901.56	-0.509145	0.0693419	-7.34252	2.0961e-13	2.57241e-11	2076.14	2035.82	2284.82	2312.51	2018.16	2057.91	2206.87	2192.43	1679.96	1694.76	1595.69	1457.39	1574.43	1434.93
STK10	1244.53	0.556227	0.0757673	7.34125	2.11611e-13	2.57602e-11	1063.48	1081.07	1053.7	1042.62	1058.92	1043.48	1009.42	1044.25	1382.05	1440.61	1620.48	1441.36	1454.64	1687.27
CEBPA	159.382	1.44972	0.197533	7.33915	2.14961e-13	2.59587e-11	93.6402	119.676	115.585	107.281	58.6707	70.211	107.21	103.116	283.888	256.498	226.114	238.127	210.627	240.706
MDM2	5329.88	0.860898	0.11765	7.31744	2.52742e-13	3.02789e-11	3672.03	3958.62	4061.6	4312.71	3772.59	3948.77	3911.51	3841.47	6525.91	6989.87	8546.72	6146.66	6530.74	8399.11
C10H15orf48	160.557	2.26973	0.310369	7.31302	2.61196e-13	3.10453e-11	65.5481	71.8057	53.7604	58.0114	74.0505	68.597	47.8321	58.1048	299.075	169.828	380.824	322.846	165.868	411.642
IFFO2	1639.57	0.569826	0.0779413	7.31097	2.65224e-13	3.12778e-11	1502.26	1414.84	1516.94	1639.42	1084.55	1037.02	1016.02	1033.61	2521.11	2730.12	2811.55	1405.87	1563.9	1676.8
ASAH1	1940.81	1.13472	0.155339	7.30482	2.77633e-13	3.24873e-11	1046.09	1151.55	1287.56	1360.49	1236.07	1292.85	1317.86	1399.43	2559.66	2371.73	3510.72	2662.91	2449.85	3524.54
GNG5	737.07	0.678768	0.0930751	7.29269	3.03825e-13	3.52788e-11	545.788	567.797	585.093	620.643	604.935	607.689	604.499	621.149	853.999	805.802	976.853	970.827	870.151	1083.76
PLA2G16	870.823	0.86767	0.119139	7.28282	3.26925e-13	3.76713e-11	599.297	537.213	632.581	572.962	743.922	666.601	752.119	750.453	991.854	862.021	1097.84	1426.47	1086.04	1472.14
FAM84B	694.962	1.33829	0.184199	7.26545	3.71804e-13	4.21984e-11	446.797	488.013	448.004	499.057	366.835	435.793	376.059	390.366	1320.14	776.522	1208.92	1118.51	725.345	1129.11
F11R	571.766	1.52486	0.209862	7.26602	3.7023e-13	4.21984e-11	323.727	321.796	360.195	344.095	263.734	296.178	282.869	315.894	878.533	730.844	1388.42	760.176	646.36	1091.9
MIC1	467.073	1.36136	0.187406	7.26422	3.75188e-13	4.22646e-11	276.907	272.596	292.098	274.958	260.316	283.265	264.726	261.881	817.783	553.989	920.324	733.845	484.441	841.888
DYRK1B	156.239	1.52597	0.210305	7.256	3.98698e-13	4.45804e-11	85.6139	106.379	90.4967	75.4943	88.2909	108.948	68.4494	112.118	221.97	159.286	255.866	301.094	223.791	289.544
SAMD9	979.326	1.81921	0.25107	7.24582	4.29834e-13	4.77085e-11	127.083	122.336	96.7688	72.3156	827.656	936.954	635.837	692.348	634.366	470.832	908.423	2966.29	1858.78	3360.58
KRT7	6863.7	1.02973	0.142271	7.23781	4.55994e-13	5.02425e-11	4879.99	4659.39	3718.43	3591.15	5667.14	5599.13	4577.86	4525.63	10056.4	7890.54	9733.81	10981.3	9078.01	11132.9
PEAR1	393.77	1.40678	0.195001	7.21418	5.42596e-13	5.93514e-11	339.78	256.639	193.538	204.232	258.037	242.914	203.699	191.5	632.029	495.428	711.069	615.926	522.617	645.37
C29H11orf24	281.851	1.20184	0.166858	7.20279	5.89927e-13	6.40644e-11	185.943	196.801	196.226	163.704	176.012	200.949	174.835	191.5	379.685	337.313	463.137	425.882	322.522	531.413
LOC100848331	1662.44	0.881294	0.122416	7.19917	6.05805e-13	6.53188e-11	1316.31	1265.91	1232.01	1212.68	1246.9	1200.04	1218.07	1225.93	2366.9	1856.39	2378.16	2342.35	1790.33	2622.18
LOC787269	68.8786	3.91134	0.54341	7.19777	6.12072e-13	6.55264e-11	8.0263	14.6271	5.37604	8.74145	10.8228	13.7194	7.42223	9.00216	134.35	51.5339	238.015	143.105	57.9223	261.637
ANKRD1	1525.67	3.19593	0.445783	7.16926	7.54064e-13	8.01592e-11	226.074	228.714	466.82	459.323	216.455	192.879	446.983	435.377	2161.28	2793.37	4858.48	2158.03	2514.36	4201.3
S100A2	13092.2	0.828487	0.115658	7.16324	7.87913e-13	8.31717e-11	11022.8	10250.9	10033.5	9610.03	9783.77	9189.57	10250.9	10444.1	16342.8	14464.6	19068	17993.5	14716.2	20120.4
LOC100847819	185.394	1.4376	0.200844	7.15782	8.19698e-13	8.5926e-11	108.355	86.4328	84.2247	86.6198	132.721	111.369	109.684	110.481	245.335	210.82	364.956	297.659	261.967	384.896
UACA	5098.37	0.949079	0.132751	7.14933	8.72047e-13	9.07831e-11	3504.82	3497.2	3724.7	3636.44	3368.16	3854.34	3316.91	3574.68	7893.94	5806.93	8764.9	7320.13	5697.45	7416.52
GCLC	9495.96	0.921717	0.128988	7.14577	8.94934e-13	9.25276e-11	4718.13	4280.42	5402.92	5240.1	8418.4	7636.86	8118.26	8180.51	11109	9978.83	13893.1	16267.1	12807.4	16892.4
HNRNPF	7136.73	-0.332257	0.0465955	-7.13066	9.98901e-13	1.02574e-10	7368.14	7514.33	7495.1	7835.52	8205.36	8219.53	8058.06	7894.07	5979.16	6308.21	5744.09	6297.78	6699.24	6295.56
LOC104975670	75.418	2.05714	0.288545	7.12936	1.00836e-12	1.02846e-10	38.7938	27.9244	18.8162	23.0456	39.3037	29.8599	28.8642	23.733	167.061	106.581	169.586	145.395	86.8835	150.005
FAM168A	1359.56	0.539528	0.0757776	7.11988	1.08018e-12	1.09432e-10	1173.18	1190.11	1231.11	1182.48	1038.98	1078.18	1149.62	1186.65	1615.71	1570.61	1769.24	1743.6	1491.5	1612.84
UBE2E2	104.972	1.31427	0.185063	7.10175	1.23187e-12	1.23967e-10	78.9253	93.0815	66.3045	79.4677	54.6834	69.404	64.326	68.7438	158.884	115.951	143.801	170.582	126.376	179.076
TCTA	232.995	1.17104	0.16495	7.09935	1.25345e-12	1.25304e-10	139.123	158.238	163.073	153.373	140.126	161.405	157.516	147.308	350.478	271.724	398.675	405.275	263.283	352.337
CIITA	2251.17	0.766637	0.10807	7.09392	1.30362e-12	1.29461e-10	121.732	101.06	113.793	120.791	3413.16	3416.13	3167.64	3274.33	295.57	290.464	269.75	6688.17	4768.06	5475.76
ADGRG1	6717.96	0.70281	0.0992274	7.08282	1.41248e-12	1.3845e-10	5571.59	5455.9	5755.95	5563.53	4714.74	5087.47	5020.72	5412.75	7646.27	9247.99	9872.66	7143.82	8784.45	8773.55
NONO	5150.87	-0.338769	0.0478247	-7.08355	1.4051e-12	1.3845e-10	5663.89	5841.53	5691.44	5951.34	5486	5582.18	5641.72	5613.25	4495.47	4660.3	4243.61	4282.86	4645.63	4312.93
PRR5L	35.9578	2.94639	0.416308	7.07742	1.46865e-12	1.43028e-10	4.01315	3.98921	5.37604	5.56274	9.1139	5.64916	10.721	5.72865	91.1244	55.0475	125.95	68.6906	36.8597	75.5839
ZFAND3	982.175	0.501807	0.0710858	7.05916	1.67507e-12	1.62084e-10	834.735	836.403	939.016	886.86	787.213	786.041	823.867	880.575	1147.23	1166.54	1184.12	1104.77	1143.97	1229.11
H3F3B	10062.9	-0.466909	0.0661814	-7.05498	1.72624e-12	1.65972e-10	11850.8	11867.9	11227	11650	11539.3	11642.1	10956	10859.9	7806.32	9061.76	7998.29	7626.95	8667.29	8127.01
LOC510185	169.742	-3.10115	0.439751	-7.05206	1.76291e-12	1.67366e-10	26.7543	33.2434	25.9842	23.8403	649.935	518.916	404.924	418.191	24.5335	58.5612	16.8594	68.6906	90.8327	15.1168
PKD2	1223.02	1.21838	0.172761	7.05237	1.75901e-12	1.67366e-10	747.784	731.354	769.67	899.575	735.948	782.813	739.748	653.884	1793.28	1665.48	2520.97	1472.27	1416.46	2193.1
SRC	858.219	0.828135	0.117513	7.04718	1.82584e-12	1.71911e-10	731.731	640.932	810.887	781.962	558.227	513.267	636.662	604.781	1106.34	1193.48	1358.67	939.916	984.679	1153.53
MMP7	675.397	1.81899	0.258149	7.04626	1.83793e-12	1.71911e-10	264.868	268.606	344.067	362.373	258.037	258.247	399.975	392.003	1016.39	845.624	1586.77	1022.35	858.303	1577.96
BTG2	155.511	1.3729	0.19488	7.04487	1.85634e-12	1.71911e-10	72.2367	81.1138	92.2887	92.1826	95.1264	95.2288	79.9951	93.2951	217.297	216.676	335.204	214.086	204.045	288.382
CLU	5471.07	1.42978	0.202942	7.04528	1.85093e-12	1.71911e-10	3246.64	2728.62	2801.81	2776.6	3790.24	3433.88	3061.26	3257.14	9098.42	5592.6	9444.23	11497.7	6121.34	9744.51
PRRX2	247.299	0.880349	0.125148	7.03444	2.00058e-12	1.84139e-10	193.969	178.185	198.914	181.981	164.62	192.879	188.854	188.227	288.561	301.005	374.873	338.874	301.459	369.78
CEP170B	1664.76	0.697325	0.0992552	7.02558	2.13186e-12	1.95033e-10	1575.83	1569.09	1403.15	1308.83	1269.11	1312.22	1223.84	1195.65	2156.61	1984.05	2228.41	2026.37	1762.68	2290.77
QSOX1	1756.09	1.55591	0.222538	6.99166	2.7165e-12	2.47021e-10	888.244	777.895	995.464	1062.48	966.643	832.848	993.753	1076.99	2549.15	1978.2	3930.22	2704.12	2112.85	3716.4
ADCK5	409.469	-0.717357	0.102645	-6.9887	2.77451e-12	2.50786e-10	539.1	472.056	457.86	503.031	508.1	483.407	451.106	464.839	332.955	338.484	310.411	322.846	294.877	253.497
SORBS1	92.5961	2.47262	0.354704	6.97093	3.14858e-12	2.82904e-10	30.7675	29.2542	41.2163	45.2966	24.4936	20.9826	38.7605	36.0086	116.826	158.115	255.866	92.7323	171.134	234.891
HNF4A	27.5347	4.32444	0.621769	6.95506	3.52412e-12	3.14773e-10	6.68858	2.65947	3.58403	4.76806	4.55695	1.61405	0	3.27351	77.1053	39.8216	92.2307	60.6767	21.0627	67.4441
DCLK2	332.705	-0.903698	0.129954	-6.954	3.55066e-12	3.15278e-10	333.091	332.434	403.203	426.742	436.328	443.056	427.19	477.933	191.595	260.012	210.246	220.955	256.701	238.38
LOXL1	1777.37	0.651511	0.0938191	6.94433	3.80258e-12	3.35673e-10	1638.7	1404.2	1485.58	1377.97	1366.52	1403.41	1350.84	1433.8	2149.6	2144.51	2586.43	2129.41	2007.53	2404.73
TTPAL	617.341	0.614868	0.0885591	6.94303	3.83786e-12	3.36817e-10	519.034	535.883	484.74	501.441	501.834	535.863	482.445	466.475	765.211	724.988	842.969	710.948	737.193	833.748
CDCA7	1190.2	-0.87891	0.12661	-6.94188	3.86903e-12	3.3759e-10	1610.61	1593.02	1524.11	1498.76	1371.07	1316.26	1392.9	1361.78	877.364	1090.41	804.292	643.402	914.909	663.975
LEPROT	1110.15	0.75494	0.108785	6.93976	3.92762e-12	3.40732e-10	833.398	795.182	826.119	835.206	890.884	888.533	855.205	877.301	1426.45	1215.73	1654.2	1417.32	1323	1703.54
TNRC6A	1918.15	-0.449819	0.0648659	-6.93459	4.07392e-12	3.51404e-10	2207.23	2255.23	2126.23	2267.21	2120.69	2157.17	2101.31	2023.85	1790.94	1684.22	1504.45	1552.41	1577.07	1486.1
LOC104973218	201.935	1.51963	0.219299	6.92948	4.22379e-12	3.62262e-10	121.732	110.368	137.089	150.989	85.4428	103.299	96.4889	111.299	426.415	242.443	391.733	301.094	207.994	340.709
DFFA	754.444	0.505357	0.0729483	6.9276	4.28046e-12	3.65049e-10	655.481	624.976	646.917	631.768	616.897	643.198	612.746	608.055	931.104	958.061	991.728	799.101	879.366	962.823
RPP14	1037.33	-0.571018	0.0825539	-6.91691	4.61592e-12	3.91446e-10	1175.85	1267.24	1190.79	1223.8	1164.3	1254.92	1130.65	1149	928.768	886.617	777.515	831.156	828.026	713.977
NECTIN4	47.7683	2.31014	0.334074	6.91505	4.67685e-12	3.94397e-10	17.3903	30.5839	25.0882	23.8403	16.5189	21.7896	15.6691	8.18378	94.6292	73.7871	110.082	78.9942	48.7074	103.492
ANXA2	44679.5	0.555655	0.0804611	6.90588	4.98929e-12	4.18408e-10	37391.9	38914.7	36703.1	36278.6	38129.7	37469.3	37526.8	37494.8	56795	46907.5	55863.1	58675.5	49191.8	58170.5
MAL2	1305.45	2.17426	0.315081	6.90064	5.17695e-12	4.31746e-10	462.85	489.343	498.18	503.825	521.771	571.373	562.44	595.779	1449.81	1633.86	3366.92	1471.12	1893.01	4255.95
LIMS2	85.3007	1.4401	0.208826	6.89619	5.34175e-12	4.43042e-10	54.8464	39.8921	53.7604	61.9848	38.1645	44.3863	56.079	53.1946	137.855	147.574	118.016	103.036	154.021	131.4
KRT8	40957.5	1.42882	0.207805	6.87575	6.16633e-12	5.08638e-10	25668.1	24117.4	18649.5	17320.8	29425.9	30670.1	22062.2	22489	55543.8	44911.8	71242.8	71694.7	52503.9	87105.2
MXD4	281.213	1.89408	0.276007	6.86243	6.7697e-12	5.55373e-10	163.201	146.271	153.217	128.738	120.19	133.159	112.983	153.855	664.741	292.806	419.501	689.196	317.256	441.875
LOC100849067	270.112	0.999377	0.145793	6.85475	7.14362e-12	5.8288e-10	252.828	227.385	198.018	178.008	173.734	194.493	184.731	183.317	346.974	305.69	434.377	388.102	338.319	375.594
GLUL	7862.79	0.760811	0.111219	6.84068	7.88193e-12	6.39665e-10	6295.3	6253.74	7819.45	7670.22	4858.85	5085.86	6112.61	6249.95	10075.1	10435.6	10878.3	9552.57	9141.2	9650.32
DNAJC3	924.566	0.55542	0.0813594	6.82676	8.68559e-12	7.01117e-10	702.301	751.3	800.134	787.525	729.682	710.988	795.003	851.113	1134.38	1106.81	1176.19	1095.62	1100.52	1202.37
CPD	6393.13	0.600016	0.0879161	6.82486	8.80086e-12	7.06644e-10	4970.96	4991.83	5738.03	5342.61	4800.75	5130.25	5047.94	5152.51	7775.95	8274.7	9394.64	6898.83	7619.42	8365.39
MCM3	3352.02	-0.984303	0.144241	-6.82403	8.8521e-12	7.06997e-10	4370.32	4530.41	4353.7	4291.26	4082.46	3894.69	4407.98	4266.2	2045.63	2591.92	1779.16	2065.3	2593.34	1655.87
LOC784541	959.452	0.651518	0.0955305	6.82	9.10429e-12	7.23312e-10	769.187	730.025	697.094	774.81	816.834	711.795	776.86	779.914	1186.95	1165.37	1386.44	1093.33	1191.36	1352.37
PCBP4	427.809	1.21943	0.179263	6.80247	1.02842e-11	8.12774e-10	286.271	222.066	320.771	337.738	213.037	231.616	326.578	301.163	542.073	637.146	701.152	538.076	659.525	672.115
TCEA1	3071.12	-0.463654	0.0685668	-6.76208	1.36021e-11	1.06939e-09	3354.99	3531.78	3490.84	3526.78	3409.17	3659.04	3385.36	3222.77	2766.44	2805.08	2403.95	2486.6	2574.91	2377.99
SEMA6B	164.907	1.63692	0.242502	6.75014	1.477e-11	1.15519e-09	132.434	117.017	68.9926	60.3955	88.8605	88.7726	75.8716	78.5643	247.671	231.902	343.138	264.459	230.373	280.242
LOC112446006	21.8739	2.41525	0.357878	6.74881	1.49065e-11	1.15986e-09	6.68858	9.30815	8.96007	5.56274	10.2531	5.64916	5.77284	6.54702	43.2257	39.8216	48.5947	40.0695	31.594	44.1875
S100A16	2996.67	0.840376	0.124894	6.72871	1.71176e-11	1.32508e-09	2568.42	2414.8	2248.98	2136.89	2261.96	2260.47	2168.94	2252.99	3862.27	3256	4512.36	4261.11	3281.83	4466.43
BOLA-DMB	510.471	1.20773	0.1798	6.71708	1.85408e-11	1.42793e-09	157.851	130.314	112.897	108.871	587.847	472.109	395.852	394.458	453.285	460.291	663.466	1042.95	1007.06	1159.34
DDX39B	3209	-0.542848	0.0811114	-6.69262	2.19213e-11	1.67971e-09	3692.1	3906.76	3705.89	3804.91	3661.51	3697.78	3717.71	3715.44	2396.1	2764.09	2245.27	2423.63	2834.24	2360.54
TNFRSF10D	2548.56	0.67049	0.100256	6.68779	2.26569e-11	1.7273e-09	1729.67	1781.85	1850.25	1928.68	2169.68	2045	2090.59	2024.67	3195.2	3129.51	3790.39	2939.96	3144.92	3859.43
HIST2H2BE	526.34	3.2058	0.480771	6.66804	2.59245e-11	1.96648e-09	136.447	114.357	89.6007	90.5932	142.405	148.492	95.6642	85.1113	1142.56	454.435	1603.62	1132.25	443.632	1689.59
CPSF7	1673.63	-0.501259	0.0752502	-6.66124	2.71527e-11	2.04935e-09	1709.6	1824.4	1972.11	1889.74	2061.45	1996.58	1952.05	2018.94	1241.86	1336.37	1171.23	1480.28	1490.18	1286.09
TSPAN15	222.884	1.2479	0.187389	6.65941	2.74924e-11	2.06467e-09	177.916	152.92	155.905	110.46	141.265	153.334	137.724	148.126	302.58	237.759	369.915	358.336	276.447	397.688
PI4K2A	1048.22	0.522412	0.0786358	6.64344	3.06438e-11	2.28994e-09	917.674	872.306	893.319	898.78	827.656	821.55	830.465	927.222	1349.34	1237.98	1433.05	1281.08	1113.69	1270.97
SLCO2A1	1332.17	1.29569	0.195568	6.62525	3.46655e-11	2.57771e-09	811.994	831.084	998.152	934.54	723.986	751.339	888.193	896.124	2313.16	1356.28	2147.09	2353.8	1428.31	2216.35
TLN2	391.572	1.26994	0.192602	6.59361	4.29246e-11	3.17621e-09	304.999	308.499	217.73	202.643	248.354	257.44	184.731	215.233	609.832	553.989	739.829	551.814	435.734	651.184
TMTC1	560.162	0.667763	0.101322	6.59051	4.38312e-11	3.22747e-09	446.797	438.813	451.588	440.251	451.708	474.53	426.366	406.734	656.563	720.303	830.077	622.795	738.51	737.234
DIS3L	1066.14	-0.376913	0.0572525	-6.58335	4.59978e-11	3.35773e-09	1189.23	1231.33	1132.55	1184.86	1151.2	1135.48	1151.27	1173.55	997.695	985	931.233	914.73	878.05	869.796
IKBIP	2024.82	0.776966	0.118023	6.58319	4.6045e-11	3.35773e-09	1391.23	1392.23	1612.81	1660.88	1481.58	1541.41	1654.33	1553.28	2536.3	2507.59	3010.89	2348.07	2469.6	3187.31
AGFG2	476.456	0.876575	0.133294	6.57625	4.82449e-11	3.50124e-09	421.381	429.504	434.563	430.715	316.138	291.335	358.741	381.364	568.943	491.914	693.218	646.836	537.098	668.627
NOTCH1	1470.89	0.833881	0.126818	6.57539	4.85247e-11	3.50469e-09	1008.64	990.653	1237.39	1223.8	1025.88	943.41	1199.1	1173.55	1697.48	2143.34	2146.1	1771.07	1948.3	2083.79
TBC1D9	897.883	1.17801	0.179259	6.57154	4.97969e-11	3.57945e-09	478.903	509.289	556.42	546.738	643.1	652.882	683.669	673.525	1007.04	901.843	1416.19	1313.14	1188.72	1998.9
MIR147	71.2625	2.1058	0.320616	6.56798	5.10037e-11	3.61485e-09	32.1052	22.6055	27.7762	24.635	32.4683	37.9301	21.442	29.4616	137.855	83.1569	156.693	133.947	75.0357	182.564
F5	656.241	1.87868	0.286038	6.56796	5.10078e-11	3.61485e-09	231.425	223.396	396.931	416.411	211.329	212.247	399.151	368.27	1126.2	893.644	1427.1	1028.07	893.847	1359.35
BAZ1B	3035.12	-0.578715	0.088097	-6.56906	5.06325e-11	3.61485e-09	3308.17	3510.5	3808.03	3823.19	3373.28	3202.27	3632.77	3620.5	2459.19	2635.25	2172.88	2272.51	2489.34	2183.79
ADAMTS1	107.237	-3.54718	0.54026	-6.56569	5.17933e-11	3.65336e-09	28.0921	9.30815	8.06406	14.3042	517.784	518.109	144.321	153.037	8.17783	10.541	3.96691	40.0695	31.594	13.9539
SLC6A17	1651.01	0.71623	0.109143	6.56233	5.29727e-11	3.71918e-09	1332.37	1437.44	1386.12	1310.42	1193.92	1124.18	1327.75	1384.7	2016.42	2054.33	2349.4	1759.62	2083.89	2353.57
ACAP1	53.7096	-1.62593	0.24811	-6.55327	5.62908e-11	3.93384e-09	56.1841	51.8597	59.1365	47.6806	107.658	90.3866	78.3457	77.7459	26.87	35.1367	34.7105	36.635	26.3283	23.2566
PTPRE	462.113	0.700358	0.10698	6.54664	5.88464e-11	4.09349e-09	337.105	349.72	364.675	336.943	402.151	433.372	327.403	385.456	539.737	503.626	601.979	630.809	584.489	672.115
TPPP3	31.4223	2.78718	0.426675	6.53233	6.47562e-11	4.46344e-09	17.3903	11.9676	12.5441	8.74145	11.962	8.07023	7.42223	4.09189	75.937	40.9928	74.3796	68.6906	30.2776	67.4441
CCDC158	47.3113	2.3145	0.354289	6.5328	6.45498e-11	4.46344e-09	32.1052	14.6271	10.7521	23.0456	15.9493	22.5967	17.3185	13.094	100.47	53.8763	102.148	83.5736	65.8208	106.98
HSP90AA1	38063.9	-0.416182	0.0637181	-6.53161	6.50661e-11	4.46442e-09	42697.2	45550.1	40785.4	41567.2	43195.9	45466.9	41724.5	40631.6	30626	33685.6	30839.8	30408.2	33522.5	32194.1
NCAPG2	857.491	-0.764292	0.117034	-6.53049	6.55544e-11	4.47757e-09	968.507	1027.89	990.088	1052.15	1085.12	1030.57	1093.54	1074.53	603.991	703.906	480.988	597.608	722.713	573.275
RAD51B	887.772	0.923902	0.141664	6.52176	6.94852e-11	4.72468e-09	647.455	626.305	629.893	592.035	613.48	661.759	688.618	662.886	1410.09	1030.68	1131.56	1536.38	985.996	1211.67
UNC5B	316.512	2.05294	0.315055	6.51612	7.21495e-11	4.88384e-09	187.28	176.855	250.882	189.928	76.8986	90.3866	112.158	135.851	775.726	340.826	805.284	556.394	250.119	482.574
EEF2K	2305.67	0.770489	0.118295	6.51329	7.35244e-11	4.95469e-09	1815.28	1776.53	1826.96	1848.42	1561.33	1712.5	1769.79	1707.95	2958.04	2889.41	3778.49	2595.36	2597.29	3441.97
SOX9	262.564	1.22652	0.188389	6.5106	7.48523e-11	5.02176e-09	184.605	195.471	241.922	200.259	120.19	161.405	129.477	157.947	346.974	448.579	491.897	244.996	367.28	384.896
EHD3	1963.27	1.7405	0.267519	6.50607	7.71407e-11	5.15239e-09	1462.12	1271.23	1049.22	936.13	962.086	981.34	729.852	853.568	4785.2	2149.2	3467.08	4008.1	1875.89	2954.75
RAD54L	534.413	-1.22757	0.188707	-6.50518	7.76016e-11	5.16034e-09	722.367	719.387	758.022	681.833	680.125	637.548	718.306	700.532	346.974	409.928	229.089	302.239	367.28	208.146
TMEM87B	869.5	0.565778	0.0870718	6.49783	8.14857e-11	5.39485e-09	651.468	680.824	715.014	727.13	765.568	738.426	649.857	719.354	1128.54	1051.76	1154.37	1049.82	967.566	1173.29
SPNS2	1409.69	0.968152	0.1491	6.49332	8.39644e-11	5.53468e-09	1565.13	1384.25	1444.36	1259.56	678.416	670.636	864.277	907.581	2037.45	1911.44	2437.67	1526.08	1265.08	1783.78
DLGAP4	1720.78	0.647653	0.0998092	6.48891	8.64585e-11	5.64975e-09	1614.62	1578.4	1693.45	1659.29	1164.3	1194.39	1308.79	1303.68	2349.37	2003.96	2385.11	2040.11	1644.2	2151.23
UHRF1	2236.09	-1.08746	0.167587	-6.48892	8.64547e-11	5.64975e-09	3013.88	2969.3	3056.28	3171.56	2666.39	2486.44	2954.05	2890.51	1385.56	1759.18	1069.08	1219.26	1642.89	1020.96
SNRPA1	1464.6	-0.58642	0.0904589	-6.48272	9.00849e-11	5.86135e-09	1697.56	1747.27	1611.92	1696.64	1680.95	1765.77	1702.99	1635.94	1316.63	1216.9	1041.31	1190.64	1204.52	995.382
FAM214B	356.137	1.08258	0.167058	6.48028	9.1555e-11	5.93143e-09	292.96	284.563	247.298	233.635	228.987	233.23	220.193	228.327	558.429	426.326	587.103	507.166	352.8	584.903
CYP39A1	36.9249	2.04461	0.316266	6.46485	1.01399e-10	6.5411e-09	18.728	11.9676	19.7122	18.2776	11.962	16.9475	20.6173	15.5492	44.3939	52.7051	87.2721	61.8215	57.9223	79.0724
TFB2M	701.623	-0.83313	0.128936	-6.46158	1.03617e-10	6.65576e-09	787.915	803.16	782.214	894.012	840.188	880.462	928.603	841.293	643.712	504.798	448.261	575.856	451.531	440.712
SLC40A1	48.3217	3.27223	0.50651	6.46035	1.04461e-10	6.68149e-09	20.0658	23.9352	13.4401	11.9202	8.54428	6.45619	4.94815	6.54702	84.1148	85.4994	217.189	38.9247	42.1253	112.794
PRNP	1302.84	1.24454	0.192972	6.44934	1.12338e-10	7.15506e-09	714.341	732.684	904.071	931.362	726.834	771.514	910.46	862.57	1820.15	1603.41	2451.55	1712.69	1507.3	2590.78
KIAA1522	986.685	1.05648	0.16402	6.44117	1.18554e-10	7.51924e-09	866.84	831.084	673.797	749.381	656.771	653.689	625.116	592.506	1385.56	1138.43	1697.84	1332.6	1001.79	1608.19
UBE2I	1636.12	-0.389552	0.0605156	-6.43722	1.21685e-10	7.68553e-09	1839.36	1972	1843.09	1844.45	1787.46	1725.42	1801.13	1823.35	1410.09	1473.4	1299.16	1410.45	1380.92	1295.39
HBEGF	316.228	0.965962	0.150437	6.42104	1.35342e-10	8.51247e-09	211.359	224.725	223.106	221.715	187.405	195.3	160.815	159.584	627.356	489.572	696.193	348.032	284.346	397.688
NCKAP1L	98.3947	3.45668	0.538413	6.42012	1.3617e-10	8.52898e-09	10.7017	21.2758	25.9842	30.1977	12.5316	9.68428	28.0395	24.5513	311.926	67.931	222.147	326.28	81.6178	204.658
PTPRU	374.571	1.12074	0.17462	6.41816	1.37931e-10	8.6036e-09	227.412	187.493	275.97	224.894	226.139	220.317	290.291	337.172	447.444	454.435	603.963	580.436	552.895	615.137
CD74	1712.9	1.80233	0.280913	6.41597	1.39931e-10	8.69245e-09	306.337	360.358	213.25	193.107	1540.25	1330.78	790.055	757	2863.41	1794.32	2271.06	4887.34	3018.54	3654.77
TOP3B	379.615	-0.614111	0.0958663	-6.40591	1.49476e-10	9.24733e-09	432.083	409.558	424.707	476.012	439.176	441.442	419.768	442.743	310.758	333.799	330.246	313.687	288.295	252.334
FOXC2	56.2634	-2.02182	0.316218	-6.39377	1.6184e-10	9.9713e-09	97.6533	87.7625	88.7047	104.103	75.1897	87.1585	59.3778	58.9232	11.6826	35.1367	29.7519	13.7381	21.0627	17.4424
KCTD11	268.027	0.848316	0.132758	6.38995	1.65935e-10	1.01821e-08	224.736	207.439	208.77	198.669	180.569	196.107	173.185	189.864	398.377	343.169	435.369	373.219	265.916	356.989
WNT2B	91.6053	1.66399	0.260999	6.37549	1.82382e-10	1.1146e-08	65.5481	53.1894	60.0325	46.0913	45.5695	50.0354	36.2864	43.374	103.975	145.232	216.197	112.195	130.325	174.424
TSC22D1	2124.96	0.740893	0.116344	6.36813	1.91344e-10	1.16466e-08	1411.29	1257.93	1394.19	1273.87	1868.92	2107.14	1896.79	1892.09	2542.14	2066.04	2309.74	3907.35	2768.42	3053.59
NPDC1	44.4556	1.55599	0.244403	6.36651	1.9338e-10	1.17232e-08	32.1052	34.5731	32.2563	19.8669	23.924	24.2107	21.442	23.733	68.9274	58.5612	77.3548	75.5597	56.6059	73.2582
MYADM	5817.43	0.762547	0.119886	6.36058	2.00989e-10	1.21357e-08	4342.23	4216.59	4558.88	4558.27	4304.04	4637.16	4618.27	4754.78	8196.52	6034.15	7924.9	8708.82	6393.83	8195.62
SRSF3	4835.33	-0.638769	0.100647	-6.34666	2.20043e-10	1.32332e-08	5554.2	5805.62	5531.95	5701.81	5838.59	5845.27	5682.13	5576.43	3511.79	4327.67	3264.77	3368.13	4215.17	3471.04
GALNT12	423.426	0.632451	0.0997933	6.33761	2.33363e-10	1.39786e-08	383.925	401.58	348.547	334.559	329.24	353.476	321.63	319.986	500.016	525.88	569.252	463.662	513.402	562.809
FAM83H	2799.73	0.646934	0.102151	6.33313	2.40236e-10	1.43334e-08	2452.03	2549.1	2331.41	2209.2	2222.65	2332.3	2182.96	2239.08	3629.79	2949.14	3559.31	3816.91	2969.84	3752.45
UGGT1	3571.18	0.534998	0.084577	6.32558	2.52285e-10	1.49931e-08	2757.03	2696.7	3184.41	3038.05	3031.51	2969.85	2924.36	3000.17	4262.99	4396.78	4774.18	3903.92	4240.18	4816.44
TSC2	847.928	0.893414	0.141278	6.32381	2.55198e-10	1.51067e-08	587.258	611.678	659.461	678.654	604.366	560.074	634.188	643.245	1299.11	935.808	1257.51	1347.48	914.909	1137.25
CD9	15592.2	0.606702	0.0960632	6.31565	2.69022e-10	1.58629e-08	12979.9	12546.1	12357.7	12130	13456.7	12811.5	12452	12718.4	19320.7	17193.6	21578	20377.1	16673.7	21694.9
ALDH3B1	683.81	1.14086	0.180687	6.31404	2.71852e-10	1.59673e-08	422.718	396.261	547.46	576.936	344.05	370.424	522.03	522.125	994.19	895.987	1077.02	1016.62	829.342	1058.17
NIPAL1	99.2458	1.7885	0.28335	6.31197	2.75507e-10	1.61193e-08	56.1841	89.0923	39.4243	41.3232	50.6961	62.1408	42.0593	44.1924	155.379	115.951	177.519	176.306	126.376	212.798
ATOX1	803.567	1.01171	0.160308	6.31108	2.77095e-10	1.61496e-08	593.946	615.667	549.252	531.639	587.847	527.793	574.81	560.589	1261.72	846.795	1197.02	1358.93	854.354	1189.57
SHISA4	694.872	0.968653	0.15404	6.28833	3.20889e-10	1.85587e-08	618.025	594.392	482.052	426.742	489.303	483.407	470.899	459.928	1010.55	842.11	1058.17	1070.43	727.978	994.219
EZR	20589.1	0.872334	0.138712	6.28882	3.19898e-10	1.85587e-08	14729.6	14632.4	16712.3	16661.2	13365.5	13789.6	15598.2	15604.8	26065.1	26285.8	34681.7	23106.4	24140.4	32874.3
MCM4	4817.58	-0.863043	0.137289	-6.28632	3.25081e-10	1.87294e-08	6243.12	6302.94	6085.68	6048.29	5795.87	5751.66	5937.78	6003.62	3344.73	3703.41	2541.8	3339.51	3825.51	2522.18
GLE1	510.601	-0.730863	0.116338	-6.28223	3.33758e-10	1.91562e-08	620.701	614.338	639.749	583.293	619.176	615.759	602.85	648.974	353.983	408.757	314.378	349.177	452.847	324.429
YPEL5	409.462	1.12459	0.179052	6.2808	3.36834e-10	1.92595e-08	258.179	301.85	306.434	334.559	248.354	259.054	268.025	258.607	523.381	495.428	789.416	547.235	448.898	693.046
DDX11	381.784	-1.0117	0.161291	-6.27249	3.55313e-10	2.02395e-08	505.657	468.067	424.707	534.023	536.011	469.688	465.951	493.482	244.167	250.642	220.164	281.631	285.662	165.122
COL27A1	301.111	-0.994765	0.158832	-6.263	3.77631e-10	2.14299e-08	398.64	377.645	394.243	418	374.24	363.16	334	377.272	205.614	260.012	165.619	174.016	227.74	145.354
MCM2	3054.42	-0.88392	0.141168	-6.26148	3.8134e-10	2.15593e-08	4148.26	4232.55	3830.43	3658.69	3744.67	3654.2	3712.76	3715.44	2126.24	2365.87	1545.11	2048.12	2344.54	1634.94
PML	2121.25	0.547281	0.0874885	6.25547	3.96329e-10	2.23231e-08	1416.64	1352.34	1549.2	1412.14	2078.54	2141.84	2279.45	2317.65	1827.16	1795.49	1869.41	3521.54	2759.21	3376.86
KIAA0513	504.187	1.06719	0.170896	6.2447	4.2462e-10	2.38277e-08	441.447	378.975	362.883	356.81	313.86	302.634	305.136	294.616	699.789	645.345	1046.27	607.912	533.149	769.793
HNRNPH3	2271.45	-0.593245	0.0950351	-6.24238	4.30953e-10	2.40934e-08	2589.82	2541.12	2679.06	2821.9	2628.22	2550.19	2678.6	2541.88	1774.59	2122.26	1700.81	1774.51	1899.59	1497.72
PBXIP1	821.872	1.45159	0.232649	6.2394	4.39258e-10	2.44672e-08	596.622	480.034	567.173	510.183	426.075	423.687	446.983	502.484	1461.5	839.768	1562.96	1574.16	762.205	1352.37
FAM214A	167.01	1.77441	0.284461	6.23779	4.43798e-10	2.46292e-08	89.627	78.4544	140.673	100.924	64.9366	56.4916	76.6963	72.0173	264.027	240.101	462.145	204.927	168.501	318.615
CTSZ	3726.42	1.03721	0.166466	6.23079	4.64076e-10	2.56602e-08	2637.98	2410.81	2477.46	2459.53	2766.64	2551.81	2660.46	2771.03	4916.04	3828.73	6144.75	6216.5	3966.36	6361.84
GAS6	463.036	1.0016	0.16077	6.23003	4.66334e-10	2.56909e-08	345.131	325.785	360.195	379.061	304.746	279.23	341.422	325.714	753.529	520.024	671.4	751.017	475.226	650.021
MCM6	3541.06	-0.812947	0.13053	-6.22806	4.72247e-10	2.58281e-08	4508.11	4866.83	4239.01	4183.18	4065.37	4496.73	4181.19	4123.81	2634.43	2988.96	2084.61	2325.18	2844.78	2032.63
BLOC1S2	790.919	0.724945	0.116394	6.22838	4.71276e-10	2.58281e-08	684.911	682.154	564.485	580.114	714.872	628.671	578.934	609.692	989.517	863.192	1035.36	1060.12	921.491	1159.34
PHEX	322.597	0.944425	0.151827	6.22041	4.95847e-10	2.7021e-08	256.842	275.255	250.882	253.502	176.012	220.317	198.751	217.689	599.318	394.703	503.798	404.13	329.104	436.061
APLP2	41651.3	1.45813	0.234435	6.21975	4.97933e-10	2.7037e-08	19914.6	17088.4	28561.1	28502.7	20645.3	17498.7	28227.5	28732.4	51964.3	62741.3	83268.5	52551.7	63191.9	80229.4
RNFT2	116.135	-1.05473	0.1696	-6.21894	5.00511e-10	2.70796e-08	144.473	144.941	173.825	175.624	125.886	142.843	154.217	129.304	80.61	84.3281	70.4127	66.4009	73.7193	59.3043
TTR	45.2922	3.00379	0.483123	6.21744	5.0533e-10	2.72427e-08	10.7017	11.9676	32.2563	22.251	5.12657	8.87726	10.721	18.8227	123.836	57.39	74.3796	129.367	53.9731	74.4211
LOC112442562	16.4203	5.94965	0.957505	6.2137	5.17504e-10	2.77997e-08	0	1.32974	0	0	0.569619	1.61405	0	0	23.3652	55.0475	45.6195	21.752	32.9104	47.676
LRP1	9924.32	0.803597	0.129448	6.2079	5.36979e-10	2.87436e-08	8319.26	7701.83	8054.21	7697.24	7351.5	7034.02	6727.01	7533.99	15701.4	11317.5	14003.2	15219.5	10444.4	11835.3
CTDNEP1	1520.43	-0.312886	0.0504856	-6.19753	5.73578e-10	3.05942e-08	1700.24	1686.1	1608.33	1655.31	1650.19	1656.82	1667.53	1716.96	1337.66	1325.83	1241.64	1363.51	1357.23	1318.65
GRK5	133.183	1.20522	0.194618	6.19275	5.91241e-10	3.14253e-08	123.07	103.719	81.5367	77.0837	71.772	65.3689	65.9753	70.3805	285.056	189.738	257.849	174.016	140.857	158.145
KIAA1217	1566.51	0.604331	0.0976865	6.18643	6.15425e-10	3.25959e-08	1185.22	1285.85	1357.45	1501.94	1154.05	1207.31	1293.94	1186.65	2143.76	1845.85	2251.22	1807.71	1731.09	1979.14
TP53INP1	4135.98	1.27337	0.206069	6.17932	6.43788e-10	3.3979e-08	2401.2	2421.45	3196.06	3300.29	2043.79	2253.21	2682.72	2671.19	5386.85	5830.35	8222.42	4379.03	5328.85	7786.3
MISP3	138.565	0.966455	0.156573	6.17253	6.7204e-10	3.53465e-08	92.3025	99.7301	115.585	91.3879	95.1264	92.0007	96.4889	100.66	191.595	173.341	230.081	193.479	155.337	212.798
PTBP1	11368.5	-0.514815	0.0834213	-6.17127	6.77454e-10	3.55076e-08	13252.8	13159.1	12857.7	12883.3	13318.3	13745.2	12958.4	12770	8622.94	9939.01	7937.79	9110.66	10190.4	8413.07
GALNT16	922.127	1.30047	0.210897	6.16638	6.98704e-10	3.64946e-08	638.091	614.338	581.509	568.989	532.024	560.074	512.134	555.679	1091.16	1188.79	2077.67	1097.9	1121.59	1769.83
IMPDH2	2846.19	-0.477476	0.0775541	-6.15668	7.42862e-10	3.86672e-08	3361.68	3565.02	3100.18	3105.6	3319.74	3220.02	3086	3135.21	2352.88	2550.93	2171.89	2161.46	2459.07	2257.05
HELLS	1607.94	-0.88263	0.143422	-6.15409	7.55102e-10	3.91693e-08	2041.36	2151.51	2006.16	2082.05	1925.88	1959.45	1932.25	1907.64	1147.23	1335.2	877.68	952.51	1308.52	883.75
ADSSL1	106.456	1.79444	0.291682	6.15205	7.64898e-10	3.95416e-08	60.1973	78.4544	41.2163	47.6806	59.81	53.2635	47.0074	45.0108	193.931	112.438	217.189	219.81	113.212	201.169
POLA2	436.963	-0.783405	0.127518	-6.14349	8.07298e-10	4.1591e-08	548.464	585.083	564.485	523.692	512.657	481.793	475.847	522.125	383.19	357.223	292.56	295.37	343.585	231.403
ADGRL3	1105.92	1.2715	0.207132	6.13859	8.32573e-10	4.27472e-08	537.762	511.948	814.471	760.506	512.087	628.671	771.087	765.183	1646.08	1574.13	2117.34	1346.34	1480.97	2016.35
SRP68	1812.21	-0.411703	0.0671443	-6.13161	8.6992e-10	4.45134e-08	2124.29	2103.64	1991.82	2009.74	2062.59	1973.98	2019.67	1973.93	1561.97	1632.69	1385.44	1466.54	1609.98	1454.7
C16H1orf115	302.549	1.05556	0.172483	6.11976	9.3719e-10	4.77935e-08	199.32	162.228	199.81	167.677	217.594	209.019	243.284	264.336	348.142	309.203	461.154	480.834	387.026	586.066
HUWE1	4827.47	-0.308824	0.0505446	-6.10993	9.96776e-10	5.06611e-08	5025.8	5180.65	5374.25	5533.34	5195.49	5169.79	4995.98	5180.33	4609.96	4441.28	4438.98	4325.22	4190.15	3923.39
MGAT3	454.271	1.01913	0.166863	6.10761	1.01137e-09	5.12304e-08	155.175	154.249	202.498	239.198	430.632	454.354	452.756	487.753	271.037	359.566	379.832	1102.48	791.166	879.099
ZNF74	369.677	-0.671838	0.110024	-6.10628	1.01981e-09	5.1485e-08	374.561	380.304	439.044	472.833	455.126	423.687	432.138	467.294	303.748	271.724	318.345	298.804	264.6	273.265
GSTM1	105.276	1.1348	0.185962	6.10233	1.04535e-09	5.25987e-08	65.5481	63.8273	55.5524	61.1901	58.1011	65.3689	91.5408	72.0173	161.22	126.492	183.47	168.292	150.071	151.168
RASSF4	124.135	1.56127	0.256136	6.09549	1.09105e-09	5.47158e-08	77.5876	65.157	51.9684	55.6274	63.7973	69.404	56.9037	78.5643	184.585	146.403	294.543	232.403	143.489	217.449
BOLA-DYA	13.2546	4.18934	0.687531	6.09331	1.106e-09	5.52819e-08	0	0	0	0	3.41771	4.03512	0	0.818378	29.2065	18.7396	11.9007	57.2422	27.6447	32.5592
ENAH	4034.95	0.873144	0.143335	6.09161	1.1178e-09	5.55038e-08	2506.88	2724.63	3352.86	3483.07	2324.61	2755.18	3236.09	3053.37	5860	5664.04	5913.68	4420.24	5323.59	5871.12
FSD2	66.627	1.19063	0.195449	6.09179	1.11654e-09	5.55038e-08	49.4955	45.211	52.8644	38.1445	44.4303	46.0003	40.4099	57.2865	80.61	71.4447	86.2804	123.643	93.4656	103.492
PLA2R1	435.3	1.63161	0.26789	6.09058	1.12503e-09	5.56795e-08	185.943	219.406	233.858	233.635	203.354	246.949	211.121	240.603	968.489	414.613	841.977	882.674	427.835	783.747
LOC100138864	136.399	0.855662	0.140557	6.08766	1.14573e-09	5.65189e-08	108.355	107.709	98.5608	126.354	113.354	101.685	94.8395	92.4767	160.052	175.684	182.478	183.175	167.185	197.681
SLC39A10	987.192	0.798075	0.131139	6.08572	1.15967e-09	5.70203e-08	707.652	760.609	701.574	769.248	769.555	861.901	709.235	671.07	1335.32	1148.97	1458.83	1238.72	1112.37	1575.63
ORC1	486.653	-1.06619	0.175261	-6.08343	1.17639e-09	5.76547e-08	662.17	632.954	602.117	628.59	637.973	664.987	602.85	562.226	329.45	374.792	229.089	272.473	384.394	229.077
CCDC9B	410.581	0.616656	0.101451	6.07835	1.21426e-09	5.93178e-08	347.806	325.785	370.947	364.757	325.252	296.985	315.857	328.988	469.641	532.907	610.905	465.951	492.34	500.017
NPM1	17811.2	-0.421212	0.0693159	-6.0767	1.22682e-09	5.97383e-08	20170.1	21207.9	18943.4	19557.8	20447	20782.5	19629.3	19024.8	14489.9	16205.1	14153	14202.9	16003.7	14540
PARP12	680.393	0.692832	0.114041	6.07529	1.23764e-09	6.00713e-08	391.951	378.975	340.483	330.586	754.745	736.005	649.857	659.613	558.429	614.893	714.044	1083.02	1026.8	1286.09
SEC14L1	2406.66	0.465055	0.0766223	6.06945	1.28349e-09	6.20627e-08	1978.48	2070.4	1968.53	2045.5	2152.59	2340.37	1992.46	1966.56	2670.65	2841.39	2917.67	3063.6	2671.01	3014.05
LOC104972821	307.741	-0.727256	0.119834	-6.06884	1.28835e-09	6.20627e-08	385.262	422.856	409.475	398.928	370.822	363.968	315.857	305.255	238.325	263.525	217.189	201.492	231.689	183.727
LRRC66	199.382	1.9426	0.320111	6.06851	1.291e-09	6.20627e-08	46.8201	39.8921	76.1606	51.654	109.367	116.211	100.612	128.485	179.912	204.964	427.435	428.171	271.182	610.485
HOXD8	532.844	0.455615	0.0751315	6.06424	1.32582e-09	6.35339e-08	506.995	525.245	499.972	478.396	426.645	440.635	442.859	428.83	643.712	617.235	661.483	555.249	597.653	634.905
TAX1BP3	2290.93	0.683298	0.112826	6.0562	1.39375e-09	6.65782e-08	2031.99	1885.56	1888.78	1664.05	1852.4	1802.89	1829.99	1807.8	3100.57	2419.75	3007.91	3237.62	2456.43	3087.31
EXTL2	352.554	0.719432	0.118809	6.05539	1.40081e-09	6.67044e-08	251.491	320.466	265.218	322.639	250.063	283.265	266.375	265.973	452.117	425.154	519.666	433.896	401.507	477.923
PRIM1	477.64	-0.888966	0.146916	-6.05083	1.44104e-09	6.8404e-08	643.442	587.743	599.429	643.689	596.961	572.987	545.121	557.315	295.57	427.497	294.543	274.762	380.444	267.451
SESN2	420.477	0.518187	0.0856936	6.04698	1.4759e-09	6.98391e-08	395.964	408.229	359.299	394.16	329.809	330.073	325.753	340.445	495.343	530.565	553.384	448.779	462.062	512.808
MS4A8	266.21	2.07158	0.342895	6.04144	1.52747e-09	7.20538e-08	124.408	126.325	93.1847	74.6997	135	153.334	84.9432	90.0216	554.924	250.642	578.178	647.981	263.283	550.018
PTPRJ	5667.82	1.09572	0.181476	6.0378	1.56227e-09	7.34657e-08	2628.61	2640.85	3426.33	3502.94	3815.88	3898.73	4295.82	4534.63	6587.83	7005.09	10494.5	7684.19	7811.61	11022.5
FAM20C	1179.35	0.6507	0.107859	6.03288	1.61061e-09	7.55038e-08	995.261	981.345	1019.66	940.103	948.985	1006.36	916.232	955.866	1467.34	1167.71	1607.59	1634.84	1323	1546.56
PPHLN1	953.795	-0.445521	0.0738861	-6.02984	1.64125e-09	7.6702e-08	1039.41	1009.27	965.896	1088.71	1099.36	1139.52	1084.47	1073.71	783.903	863.192	781.482	741.858	864.886	817.469
COL6A2	5438.24	1.68036	0.278855	6.02593	1.68136e-09	7.81245e-08	2965.72	2936.06	3000.73	2984.81	2646.45	2818.13	2841.06	2892.97	12575.2	5187.35	8369.2	13608.8	5145.87	8163.06
LOC112443864	152.879	1.8891	0.313498	6.02587	1.68204e-09	7.81245e-08	58.8595	74.4652	45.6964	61.1901	59.81	74.2461	56.9037	82.6562	307.253	152.259	408.592	290.79	160.603	306.987
RBBP4	4526.15	-0.375752	0.0623914	-6.02249	1.71757e-09	7.90987e-08	4909.42	5055.65	5215.66	5317.98	4767.14	4875.23	5121.34	5016.66	3817.88	4183.61	3650.55	3685.25	4051.93	3697.8
SERPINB5	45.2008	3.7699	0.625983	6.02238	1.71874e-09	7.90987e-08	12.0395	11.9676	8.96007	10.3308	6.26581	4.84214	6.59753	4.91027	51.4035	58.5612	225.122	35.4901	38.1761	158.145
WFS1	401.215	0.568664	0.0944177	6.02285	1.7137e-09	7.90987e-08	330.416	363.018	360.195	361.578	296.202	289.721	328.227	330.625	570.112	505.969	499.831	498.007	433.101	450.015
DDX39A	1697.56	-0.74924	0.124568	-6.01471	1.80214e-09	8.24342e-08	2185.83	2140.87	2072.46	2031.99	2075.69	2025.63	1991.63	2020.58	1225.51	1387.9	984.786	1118.51	1462.54	1041.89
ZDHHC9	1250.66	1.43399	0.2384	6.01504	1.79847e-09	8.24342e-08	787.915	813.798	984.712	965.533	553.67	637.548	724.079	774.186	2562	1262.58	1996.35	2350.36	1195.31	1901.23
NRG1	293.135	3.09946	0.516078	6.0058	1.90391e-09	8.68262e-08	22.7412	21.2758	48.3844	47.6806	79.7466	95.2288	88.242	88.3848	600.486	245.957	506.773	1324.58	244.853	689.558
HTATIP2	546.636	0.421591	0.070222	6.00368	1.92895e-09	8.77033e-08	490.942	472.056	466.82	490.316	493.29	519.723	484.919	473.022	591.14	600.838	588.095	664.009	689.802	627.928
ZNF706	1295.38	0.547814	0.0912708	6.00207	1.94817e-09	8.83113e-08	996.599	1086.39	1147.79	1162.61	1001.96	1049.94	1149.62	1048.34	1571.31	1535.47	1728.58	1415.03	1502.03	1739.59
MPZL3	120.561	1.05249	0.175621	5.993	2.06008e-09	9.31045e-08	72.2367	87.7625	68.0965	74.6997	96.2656	76.6672	70.0988	94.9318	168.23	155.773	196.362	179.74	143.489	203.495
LSR	163.085	1.31104	0.218939	5.98814	2.12248e-09	9.52735e-08	128.421	101.06	91.3927	82.6464	113.924	108.948	100.612	102.297	206.782	181.54	273.717	286.211	177.716	327.918
FAM89A	143.749	0.88028	0.146993	5.98857	2.11692e-09	9.52735e-08	119.057	126.325	113.793	99.3346	98.5441	108.141	121.23	127.667	169.398	138.204	165.619	211.796	184.298	229.077
ILF3	5384.89	-0.498335	0.083225	-5.9878	2.12701e-09	9.52735e-08	6418.36	6188.59	6082.1	6173.05	6085.24	6239.9	5905.62	6042.9	4520	4857.07	3984.76	4316.06	4765.43	3809.43
MAP3K9	335.961	1.07422	0.179723	5.97712	2.27121e-09	1.01432e-07	291.622	285.893	286.722	260.654	197.088	209.826	168.237	175.133	603.991	384.162	655.533	407.564	321.206	455.829
POLD1	795.024	-0.624734	0.104576	-5.97396	2.31566e-09	1.02808e-07	957.805	944.112	970.376	910.7	925.061	869.971	931.077	1008.24	626.188	641.831	526.608	617.071	688.486	512.808
XRCC2	242.521	-0.841758	0.140903	-5.97405	2.31441e-09	1.02808e-07	275.57	303.18	255.362	269.396	327.531	295.371	310.084	293.798	185.754	211.992	151.734	168.292	205.361	141.865
OSTF1	3352.4	0.575306	0.0963563	5.97061	2.36371e-09	1.04634e-07	2646	2655.48	2831.38	2825.87	2659.55	2702.72	2900.44	2886.42	3879.8	3876.75	4613.52	3869.57	3775.48	4810.62
BSG	13132.6	0.615978	0.103178	5.97005	2.37174e-09	1.04683e-07	10570.6	10135.2	11970.7	11352.8	10176.2	9576.14	11307.3	11201.1	15294.9	15218.9	18478.9	15457.7	14991.3	18125
METTL9	4943.56	0.309674	0.051905	5.96618	2.42871e-09	1.06885e-07	4462.62	4607.53	4662.82	4797.47	4162.21	4366	4605.08	4534.63	5337.79	5551.6	5704.42	5294.9	5484.19	5638.56
ELOVL7	3074.58	1.11853	0.187777	5.95671	2.5736e-09	1.12932e-07	1779.16	1916.15	2398.61	2469.86	1723.67	1714.12	2180.48	2207.17	4551.55	3655.39	5707.4	4048.17	3400.3	5292.04
PHLDA3	6562.7	0.551718	0.0927265	5.94995	2.68217e-09	1.17355e-07	6419.7	6199.23	5759.53	5231.36	5304.29	5487.76	5141.13	5309.64	8347.23	7447.81	7879.28	8653.87	6796.66	7900.26
DCAF13	1451.18	-0.384263	0.0646369	-5.94494	2.76563e-09	1.20657e-07	1523.66	1700.73	1610.12	1625.11	1576.14	1696.36	1557.02	1576.2	1247.7	1327	1194.04	1215.82	1287.46	1179.11
HOXB6	833.354	-0.70336	0.118387	-5.94117	2.82996e-09	1.23107e-07	1171.84	1122.3	1159.43	1324.73	860.694	696.461	843.66	851.932	778.062	639.488	719.995	571.277	491.023	436.061
CLIC3	75.3531	1.19328	0.201009	5.93646	2.91245e-09	1.26332e-07	68.2236	58.5083	50.1764	43.7072	43.291	60.5267	42.884	40.1005	110.985	97.2116	119.999	105.326	100.048	113.957
EPAS1	22.8446	3.40177	0.573455	5.93206	2.99149e-09	1.29389e-07	6.68858	2.65947	10.7521	2.38403	5.69619	2.42107	3.29877	4.91027	47.8987	36.308	65.4541	30.9108	23.6955	76.7467
PLAU	8773.23	0.792494	0.133679	5.92834	3.06009e-09	1.31977e-07	6099.99	6011.73	6039.98	6314.5	6709.54	6459.41	6771.54	6802.36	11093.8	10938.1	14844.2	9412.9	11100	14227.2
TRIM28	4889.5	-0.672127	0.113435	-5.92523	3.1186e-09	1.33787e-07	6427.73	5965.19	5874.22	5701.01	5766.82	5733.09	5673.88	5747.47	3364.59	4233.98	3173.53	3328.06	4249.39	3214.06
GSDME	18.558	5.90336	0.99632	5.92517	3.11977e-09	1.33787e-07	0	0	0	0.794677	0	0.807023	0.824692	1.63676	23.3652	28.1094	67.4375	11.4484	38.1761	87.2122
TFB1M	210.354	-0.710101	0.119874	-5.92372	3.14735e-09	1.34587e-07	266.206	214.087	245.506	248.734	243.797	242.914	232.563	246.332	176.407	211.992	173.552	153.409	148.755	140.702
NCKAP5L	291.833	0.920028	0.15543	5.91924	3.23432e-09	1.37915e-07	266.206	255.309	211.458	195.491	178.86	206.598	193.803	207.05	417.069	393.531	447.27	341.163	306.725	465.132
RAN	9777.66	-0.453509	0.0766576	-5.91603	3.29798e-09	1.40234e-07	11355.9	12031.4	10641.9	10626.4	11225.5	11525.9	10703.7	10595.5	8333.21	8422.27	7296.15	8048.25	8634.37	7446.76
RRM2B	576.35	1.00636	0.17017	5.91386	3.34185e-09	1.41303e-07	313.026	301.85	367.363	425.152	464.809	504.39	470.899	464.839	540.905	572.729	773.548	781.928	888.581	1198.88
CAVIN2	50.8351	3.00482	0.508087	5.91399	3.33919e-09	1.41303e-07	16.0526	15.9568	8.96007	10.3308	17.6582	18.5615	4.12346	7.3654	107.48	57.39	157.685	92.7323	47.391	150.005
IPO4	1352.66	-0.495085	0.083728	-5.91302	3.3589e-09	1.41627e-07	1607.94	1599.67	1426.44	1513.86	1560.76	1572.89	1518.26	1523.82	1181.11	1148.97	995.695	1155.15	1157.13	975.614
PDZD2	37.3307	3.10532	0.525599	5.90815	3.45963e-09	1.45468e-07	12.0395	5.31894	8.06406	7.94677	6.83543	10.4913	9.07161	9.82054	77.1053	35.1367	109.09	82.4287	23.6955	125.586
PRELID3A	160.664	-0.90582	0.153769	-5.8908	3.84325e-09	1.6115e-07	185.943	188.822	190.85	200.259	209.05	213.054	196.277	162.857	144.864	140.547	103.14	101.891	110.579	101.166
NFKB2	851.848	0.59055	0.100258	5.89033	3.8543e-09	1.61165e-07	717.016	655.559	775.046	745.407	674.998	658.531	706.761	701.35	1003.54	985	1208.92	1030.36	921.491	1141.9
HKDC1	574.416	0.983651	0.167044	5.88856	3.89579e-09	1.6245e-07	408.004	359.028	528.644	484.753	294.493	329.266	440.385	449.29	841.148	780.035	886.605	760.176	675.322	804.678
LOC784058	87.6279	1.01753	0.173077	5.87908	4.12546e-09	1.71553e-07	66.8858	63.8273	67.2005	71.5209	56.3923	50.0354	79.1704	54.8313	114.49	124.15	114.049	116.774	127.692	119.771
CD151	1385.24	0.836325	0.142421	5.8722	4.30058e-09	1.78344e-07	1051.45	1089.05	1038.47	1021.95	999.112	989.411	1094.37	1058.98	2047.96	1430.06	2029.08	2137.42	1446.74	1959.37
AHNAK2	299.515	1.22349	0.208426	5.87015	4.35413e-09	1.8007e-07	270.219	248.66	232.962	185.954	194.81	197.721	132.775	162.857	469.641	358.395	533.55	460.227	289.612	455.829
PLCD1	381.669	1.12578	0.191905	5.86632	4.45576e-09	1.8377e-07	299.649	299.19	264.322	247.939	298.48	267.125	208.647	202.958	523.381	470.832	659.499	500.297	417.304	683.744
TM4SF4	46.8991	2.02297	0.345178	5.86066	4.61029e-09	1.89625e-07	20.0658	19.946	28.6722	22.251	14.8101	12.1053	19.7926	29.4616	78.2735	69.1022	112.065	62.9664	56.6059	110.469
LOC100138449	513.386	-0.495779	0.0846101	-5.85957	4.64074e-09	1.90359e-07	595.284	594.392	656.773	600.776	562.783	558.46	553.368	547.495	419.406	461.462	452.228	356.046	437.05	391.873
POLR1A	2635.43	-0.456321	0.0779716	-5.8524	4.84525e-09	1.98209e-07	3135.61	3128.87	2986.39	2964.15	3018.98	2911.74	2824.57	2870.05	2201	2454.89	2040.98	2111.09	2320.84	1926.81
TGFA	1550.02	0.94778	0.162006	5.85026	4.90808e-09	2.00236e-07	1007.3	1098.36	1189	1280.22	935.314	935.34	1112.51	1122.81	2258.25	2066.04	2757.01	1565	1831.14	2541.94
HAUS5	306.561	-0.683533	0.116872	-5.84857	4.95817e-09	2.01735e-07	394.626	353.71	353.923	381.445	378.797	317.16	380.183	338.808	232.484	255.327	243.965	250.721	221.158	189.541
CACYBP	1992.18	-0.396842	0.0678631	-5.84768	4.98482e-09	2.02274e-07	2319.6	2428.1	2167.44	2133.71	2197.59	2280.65	2170.59	2182.61	1620.38	1747.47	1608.58	1591.33	1808.76	1633.77
SRSF2	6205.9	-0.670689	0.114839	-5.84024	5.21266e-09	2.10952e-07	7485.86	7548.91	6969.14	7239.51	7660.8	7668.34	7046.99	6790.9	4930.06	5746.03	4051.21	4372.16	5224.86	4147.81
C13H20orf202	26.1909	2.52618	0.432581	5.83978	5.22687e-09	2.10962e-07	8.0263	3.98921	6.27205	7.94677	2.84809	8.07023	7.42223	11.4573	66.5909	42.1641	77.3548	50.3731	27.6447	46.5132
SF3A3	1727.14	-0.349695	0.0598899	-5.83896	5.25266e-09	2.11437e-07	1863.44	1942.74	1856.53	1866.7	2014.74	1830.33	1909.16	1913.37	1477.85	1547.19	1439	1492.88	1607.34	1418.65
SYNC	1350.41	0.59866	0.102537	5.83846	5.26849e-09	2.1151e-07	1110.3	1158.2	1256.2	1241.29	947.846	1022.5	1123.23	1094.17	1593.51	1746.3	1859.49	1394.42	1545.47	1812.85
STIP1	3816.9	-0.450505	0.0772087	-5.8349	5.38242e-09	2.15511e-07	4279.36	4422.7	4489	4500.26	4128.6	4186.84	4383.24	4209.74	3164.82	3534.75	2855.19	3026.97	3371.34	2883.82
NAGA	2193.25	0.801052	0.137553	5.8236	5.75937e-09	2.29994e-07	1781.84	1545.15	1825.17	1764.18	1539.11	1485.73	1702.99	1729.23	3057.34	2343.62	3495.84	2913.63	2356.39	3165.22
ARHGEF37	67.1839	1.22575	0.210515	5.82262	5.79317e-09	2.30733e-07	46.8201	51.8597	43.9044	38.9392	39.8733	43.5793	41.2346	37.6454	92.2927	96.0404	124.958	103.036	71.0865	109.306
NPR2	39.3507	3.93807	0.676929	5.81755	5.97162e-09	2.37215e-07	5.35087	2.65947	6.27205	12.7148	1.70886	2.42107	8.24692	9.82054	33.8796	86.6706	130.908	27.4762	85.5671	137.214
SP1	2194.4	-0.384739	0.0661405	-5.817	5.99125e-09	2.3737e-07	2228.64	2269.86	2495.38	2565.22	2429.42	2417.84	2430.37	2518.15	1844.68	2003.96	1890.23	1926.77	1931.18	1769.83
RPS27L	1768.94	0.810049	0.139271	5.81636	6.0144e-09	2.37663e-07	1486.2	1483.98	1145.99	1188.84	1494.11	1461.52	1234.56	1238.21	2462.7	1970	2460.48	2587.35	1993.05	2558.22
ABCC3	606.321	0.628451	0.10806	5.81574	6.03672e-09	2.37922e-07	414.692	417.537	437.252	427.536	573.606	543.127	519.556	482.843	615.674	744.899	852.886	805.97	781.951	870.959
ELK3	2044.07	-0.520556	0.089565	-5.81204	6.17147e-09	2.426e-07	2208.57	2264.54	2061.71	1997.82	2655.56	2630.9	2245.64	2220.26	1894.92	1698.28	1637.34	1708.11	1756.1	1637.26
GINS1	1294.22	-0.551377	0.0949062	-5.80971	6.25828e-09	2.45373e-07	1625.33	1534.51	1485.58	1543.26	1427.46	1499.45	1455.58	1400.24	1127.37	1120.86	938.175	1029.21	1091.31	840.725
LOC112442408	434.645	1.5643	0.269636	5.80152	6.57177e-09	2.56997e-07	315.701	301.85	120.065	316.282	215.886	254.212	268.849	273.338	463.8	578.585	732.887	904.426	674.005	665.138
EIF4G1	20545.2	-0.340427	0.0586963	-5.79981	6.63903e-09	2.58956e-07	23379.3	24160	22343.7	22185	23175.5	22311	22454.7	22097	17477.2	18499.5	16212.8	18251.1	18323.2	16763.3
ABCD4	474	-0.700454	0.120812	-5.79787	6.71643e-09	2.61224e-07	523.047	453.44	428.291	437.072	735.948	664.987	658.104	633.425	309.589	293.977	253.882	461.372	440.999	341.872
EMX2	1028.15	0.515174	0.0888616	5.79748	6.73176e-09	2.61224e-07	1052.78	962.728	1119.11	1041.82	684.112	664.18	706.761	741.45	1296.77	1494.48	1633.38	976.551	997.844	1022.13
ZNF697	1607.91	0.76676	0.132305	5.79541	6.81556e-09	2.63797e-07	1232.04	1315.11	1600.27	1624.32	907.403	1024.92	1180.96	1172.74	2172.97	2193.7	2621.14	1740.16	1708.71	2016.35
SF3B3	4772.57	-0.666456	0.115013	-5.79464	6.84683e-09	2.6433e-07	5651.85	5912	5502.38	5548.44	5689.35	5867.87	5589.76	5566.61	3753.62	4011.44	2987.09	3529.55	4195.42	3010.56
ABHD14B	992.336	0.944302	0.163043	5.79173	6.96646e-09	2.68172e-07	746.446	740.662	695.302	726.335	758.732	774.742	663.052	707.897	1372.71	1018.97	1497.51	1623.39	1001.79	1565.17
CD109	2811.56	0.892468	0.154103	5.79136	6.98188e-09	2.68172e-07	1894.21	1720.68	2214.93	2233.84	2071.7	1861	2085.65	2091.77	3378.61	3706.92	4810.87	3045.28	3654.37	4592.01
MVP	783.143	1.5535	0.268288	5.79045	7.02001e-09	2.68952e-07	329.078	311.158	335.107	290.852	483.606	530.214	478.321	539.311	1199.8	612.55	1383.46	1861.52	824.077	1784.94
MCCD1	77.899	1.48644	0.256757	5.78929	7.06842e-09	2.70121e-07	38.7938	61.1678	40.3203	46.886	33.0379	42.7722	47.0074	45.8292	146.033	99.5541	137.85	122.498	77.6686	151.168
MRVI1	39.4674	5.00842	0.866561	5.77965	7.48574e-09	2.85347e-07	2.67543	2.65947	0.896007	3.17871	0.569619	1.61405	1.64938	6.54702	71.2639	194.423	22.8098	68.6906	159.286	16.2796
TRPM6	347.077	0.631781	0.109417	5.77407	7.73786e-09	2.94214e-07	306.337	253.979	256.258	272.574	269.999	294.564	290.291	335.535	417.069	358.395	423.468	430.461	459.429	490.714
ATP6V1B1	1939.24	0.831384	0.144086	5.77005	7.92497e-09	3.00571e-07	1432.69	1422.82	1782.16	1671.21	1221.83	1228.29	1541.35	1595.84	2259.42	2479.48	3060.47	2218.71	2422.21	2812.88
STAP2	856.564	0.796793	0.138116	5.76901	7.97385e-09	3.01667e-07	704.977	708.749	649.605	554.685	601.518	657.724	673.773	656.339	1091.16	989.684	1332.88	1078.44	950.453	1341.9
SYNGR2	1350.43	0.773508	0.134141	5.7664	8.0984e-09	3.05613e-07	1190.57	1070.44	991.88	988.578	1016.2	1098.36	1030.86	1045.89	1862.21	1440.61	1799.99	1970.28	1386.19	2014.02
PRPF8	11914.4	-0.411076	0.071325	-5.76341	8.24292e-09	3.10292e-07	13494.9	13671	13416.8	13253.6	13261.3	13390.1	13509.3	13354.3	9358.94	10833.8	9069.36	9805.58	11007.9	9374.73
LAMB2	1572.46	0.767081	0.133111	5.76273	8.27653e-09	3.10782e-07	1277.52	1184.79	1252.62	1288.97	1160.31	1114.5	1191.68	1214.47	2083.01	1797.83	2476.35	1956.54	1599.45	2416.36
MED10	472.076	0.523028	0.0907792	5.76154	8.33503e-09	3.12202e-07	362.521	405.569	372.739	409.259	467.657	391.406	425.541	423.92	518.708	476.688	511.732	626.229	564.743	652.347
TOR4A	129.278	1.20035	0.20863	5.75348	8.74265e-09	3.26659e-07	64.2104	71.8057	74.3686	69.9316	85.4428	96.8428	72.5729	96.5686	235.989	160.458	177.519	266.749	151.388	186.053
HNRNPK	15278.8	-0.340925	0.0592887	-5.75025	8.91135e-09	3.3214e-07	16705.4	17128.3	16243.7	16766.9	16814	17345.4	16845.2	16536.1	13127.8	14201.1	12192.3	13133.6	14154.1	12709.7
RPA2	1094.13	-0.674586	0.11744	-5.74409	9.24192e-09	3.43613e-07	1264.14	1303.14	1320.71	1304.07	1316.39	1332.4	1309.61	1243.93	871.523	945.178	660.491	833.446	916.226	696.535
RALGDS	269.288	0.982518	0.171194	5.73921	9.51168e-09	3.52774e-07	228.75	158.238	179.201	175.624	195.379	216.282	175.659	160.402	359.825	353.71	459.17	358.336	304.092	445.364
CHAF1B	616.485	-0.730926	0.127483	-5.73349	9.83831e-09	3.63993e-07	809.319	791.192	756.23	708.057	795.758	753.76	685.319	662.068	511.699	467.318	379.832	493.427	452.847	363.966
NRM	393.739	-0.813901	0.14197	-5.73292	9.87184e-09	3.64341e-07	535.087	549.181	511.62	474.422	468.796	483.407	446.158	423.92	296.738	319.744	224.131	266.749	305.409	206.984
IMMP2L	330.819	0.703559	0.122733	5.73243	9.89999e-09	3.64489e-07	227.412	234.033	275.97	270.985	259.746	263.09	277.096	273.338	438.098	366.593	437.352	476.255	359.382	472.109
TOMM40	2137.39	-0.55399	0.0968501	-5.72008	1.06477e-08	3.91063e-07	2640.65	2555.75	2430.87	2420.59	2542.21	2534.86	2436.14	2403.58	1712.67	1810.71	1367.59	1747.03	1811.39	1509.35
MUC4	13.7152	6.47247	1.13184	5.71856	1.07433e-08	3.92663e-07	0	0	0.896007	0	0	0	0.824692	0.818378	17.5239	25.7669	46.6112	14.883	38.1761	46.5132
GMEB1	404.932	-0.51478	0.090015	-5.71882	1.07265e-08	3.92663e-07	397.302	452.11	439.044	454.555	470.505	506.004	464.301	489.39	294.402	356.052	333.221	340.018	329.104	343.035
POLK	728.674	0.773976	0.135366	5.71765	1.08007e-08	3.93807e-07	528.398	632.954	595.845	599.981	545.695	566.53	531.101	549.95	845.821	890.13	1102.8	785.363	867.518	1159.34
2021-09-08	2665.27	0.576898	0.10092	5.71638	1.0882e-08	3.95815e-07	2049.38	2200.71	2413.84	2446.02	1985.69	1988.51	2265.43	2368.39	3156.64	3178.7	3632.7	2889.58	3266.03	3472.21
TTC14	628.489	-0.740237	0.129712	-5.70677	1.15138e-08	4.16789e-07	698.288	700.77	752.646	789.114	763.859	774.742	759.541	716.081	503.521	438.038	551.401	483.124	340.952	526.762
GPBAR1	100.743	1.2332	0.216084	5.70703	1.14963e-08	4.16789e-07	86.9516	50.5299	73.4726	59.6008	63.7973	58.9127	65.9753	76.9275	144.864	119.465	142.809	206.072	134.274	126.748
RFC5	1009.03	-0.715657	0.125547	-5.70032	1.19582e-08	4.31839e-07	1246.75	1237.98	1175.56	1223.01	1242.91	1198.43	1223.02	1105.63	783.903	892.473	616.855	781.928	799.065	598.857
ZMAT3	1526.5	1.11415	0.195514	5.69858	1.2081e-08	4.35234e-07	933.726	937.463	1065.35	1137.18	938.732	1004.74	1058.08	937.861	1875.06	2260.46	2827.42	1477.99	1977.26	2939.63
MOSPD1	206.785	1.20475	0.211437	5.69792	1.21275e-08	4.35868e-07	115.044	124.995	108.417	118.407	150.949	134.773	150.094	117.846	378.517	210.82	328.262	358.336	226.424	372.105
RGS12	279.466	0.651418	0.11453	5.68776	1.28717e-08	4.61518e-07	188.618	202.12	207.874	227.278	226.139	246.949	233.388	234.874	331.786	329.114	378.84	401.84	310.674	393.036
IL31RA	13.007	4.36224	0.767147	5.68631	1.29813e-08	4.64343e-07	1.33772	3.98921	0	0.794677	4.55695	1.61405	1.64938	1.63676	4.67305	4.6849	5.95037	95.022	13.1642	43.0247
MCM10	1968.49	-0.738821	0.130233	-5.67307	1.40264e-08	5.00387e-07	2223.29	2329.7	2349.33	2450.78	2329.74	2370.23	2535.93	2415.03	1463.83	1599.89	1151.4	1282.22	1787.69	1269.81
CGN	581.114	0.537988	0.0948418	5.67247	1.4075e-08	5.00387e-07	533.749	539.872	562.693	530.05	463.67	415.617	464.301	444.379	639.039	769.494	823.135	618.215	687.169	644.207
LOC112447558	20.9036	2.74884	0.484607	5.67231	1.40884e-08	5.00387e-07	20.0658	17.2866	17.0241	8.74145	1.70886	4.84214	5.77284	4.91027	30.3748	50.3626	47.603	17.1727	34.2268	32.5592
CDCA7L	1751.87	-0.465772	0.0821629	-5.66889	1.43727e-08	5.09285e-07	1962.43	2144.86	2086.8	2105.1	1888.86	1907	2026.27	1982.11	1486.03	1383.22	1315.03	1527.22	1491.5	1219.81
LOC112449360	57.2395	1.37015	0.241753	5.66754	1.44859e-08	5.11892e-07	44.1447	37.2326	42.1123	36.5552	44.9999	33.088	26.3901	27.0065	94.6292	69.1022	88.2638	104.181	71.0865	82.5609
SMARCA4	4673.76	-0.415734	0.0733578	-5.66721	1.45141e-08	5.11892e-07	5360.23	5533.03	5398.44	5162.22	5167.01	5132.67	5116.39	5118.14	4029.33	4259.74	3607.91	3976.04	4128.28	3443.14
CCNB2	921.153	-0.868307	0.153469	-5.65787	1.53266e-08	5.39287e-07	1210.63	1160.86	1154.06	1189.63	1135.25	1115.31	1184.26	1131.82	725.49	466.147	548.426	783.073	492.34	598.857
USP39	962.275	-0.486571	0.0860809	-5.65248	1.58147e-08	5.53882e-07	1046.09	1147.56	1102.98	1060.1	1076.01	1106.43	1116.63	1049.98	887.879	816.343	731.896	787.652	850.405	691.883
C16H1orf112	358.165	-0.944236	0.167047	-5.65253	1.58104e-08	5.53882e-07	418.705	433.494	414.851	419.59	477.341	467.266	457.704	505.758	190.427	279.923	203.304	216.375	333.053	196.518
S100A10	9430.89	0.438252	0.0775644	5.65017	1.60287e-08	5.60078e-07	7530.01	7526.3	7864.26	8060.41	8600.68	7922.55	8806.06	8914.59	9791.2	10560.9	11655.8	10658.5	11629.2	12512
S100A14	1259.09	0.893542	0.158172	5.64918	1.61213e-08	5.61338e-07	1063.48	999.961	913.927	921.031	950.124	984.568	901.388	941.953	1740.71	1267.26	1680.98	2140.86	1265.08	1855.88
SLC6A12	29.3232	3.64251	0.644808	5.64899	1.61392e-08	5.61338e-07	17.3903	7.97841	5.37604	5.56274	5.69619	4.03512	4.94815	2.45513	31.5431	37.4792	125.95	36.635	28.9612	96.5148
DKC1	3100.99	-0.568055	0.100599	-5.64675	1.63514e-08	5.67411e-07	3700.12	3909.42	3393.18	3583.99	3697.97	3671.96	3456.28	3431.46	2420.64	2796.88	2136.18	2314.87	2707.87	2193.1
MRPL37	779.346	-0.422278	0.0748056	-5.64501	1.65173e-08	5.71856e-07	901.621	851.03	874.503	882.886	886.897	854.638	911.284	839.656	693.947	652.372	606.938	700.644	655.575	598.857
CHAF1A	1294.86	-0.905714	0.160558	-5.64103	1.6904e-08	5.83905e-07	1807.26	1728.66	1659.41	1662.46	1582.97	1426.82	1519.08	1523.82	925.263	1131.4	735.863	812.839	1011.01	601.183
SOWAHA	57.4918	1.68971	0.299898	5.63429	1.75776e-08	6.05787e-07	13.3772	14.6271	10.7521	19.0723	31.329	39.5441	47.8321	45.0108	44.3939	59.7324	85.2886	98.4565	110.579	184.89
ISOC2	298.656	0.814178	0.144525	5.63348	1.7661e-08	6.07272e-07	274.232	256.639	225.794	219.331	210.189	213.054	220.193	261.063	427.584	343.169	340.163	462.517	333.053	394.199
ZBED5	387.104	-0.590816	0.104887	-5.63289	1.77216e-08	6.07972e-07	444.122	441.472	485.636	485.548	465.948	397.862	394.203	447.653	324.777	354.881	326.279	307.963	289.612	253.497
C3H1orf210	158.704	1.50738	0.267779	5.62921	1.81041e-08	6.19685e-07	115.044	97.0707	81.5367	73.905	104.24	89.5796	79.9951	99.0237	234.821	165.143	286.61	286.211	154.021	354.663
SMARCB1	1226.84	-0.478914	0.0851209	-5.62628	1.8414e-08	6.28868e-07	1487.54	1499.94	1406.73	1445.52	1327.21	1353.38	1394.55	1385.51	1030.41	1015.45	890.572	1062.41	1034.7	841.888
WDR90	192.781	-0.909617	0.161718	-5.62471	1.85823e-08	6.33181e-07	267.543	244.671	240.13	254.297	246.645	237.265	211.121	213.597	142.528	169.828	108.098	143.105	122.427	97.6776
SULF2	4809.73	1.12627	0.200252	5.62425	1.86319e-08	6.33444e-07	3518.2	3607.57	2881.56	2910.11	3475.81	3425.81	2831.17	2885.6	8417.32	5018.7	7705.73	8363.08	4752.26	7543.27
REL	129.964	1.32399	0.235487	5.62237	1.88351e-08	6.38913e-07	97.6533	78.4544	106.625	108.076	50.6961	75.8602	80.8198	77.7459	178.744	192.081	239.998	119.064	186.931	226.752
LOC112444653	2297.99	-0.734446	0.13077	-5.61633	1.95059e-08	6.60183e-07	2557.71	2904.14	3144.99	3009.44	2473.85	2643	3220.42	2857.78	1186.95	1492.14	1635.36	1468.83	1737.67	1839.6
NT5C2	2029.25	0.511946	0.0912217	5.61211	1.99876e-08	6.74974e-07	1664.12	1805.78	1656.72	1635.45	1798.29	1777.07	1739.27	1640.85	2438.16	2137.48	2678.66	2533.54	2206.31	2697.76
PPP2R5D	1441.78	-0.364573	0.0650033	-5.60853	2.04052e-08	6.87538e-07	1700.24	1664.83	1645.07	1644.19	1482.15	1492.19	1572.69	1575.38	1280.41	1359.79	1199.99	1174.61	1278.24	1115.15
MMP16	610.986	-0.726227	0.129655	-5.60124	2.12819e-08	7.1548e-07	692.937	777.895	760.71	783.552	656.771	742.461	699.339	736.54	461.463	561.016	394.708	428.171	498.922	359.314
ITGA3	16375.8	0.619338	0.110585	5.60054	2.13684e-08	7.16791e-07	14961	14745.4	13631	13017.6	13258.4	13176.3	12174.1	12593.2	20799.7	18131.7	23782.6	19590.6	16859.3	22540.3
CDADC1	941.415	0.844686	0.150899	5.59769	2.17223e-08	7.27047e-07	351.82	316.477	395.139	386.213	1068.04	1100.78	1005.3	1038.52	523.381	572.729	748.755	1859.23	1499.4	2314.03
SF3A1	2588.19	-0.416016	0.0743286	-5.59699	2.18109e-08	7.28398e-07	3029.93	3073.02	3165.59	2915.67	2940.94	2839.11	2831.99	2781.67	2237.22	2146.85	1867.42	2303.42	2127.33	1974.48
BRIP1	214.039	-1.05671	0.188841	-5.59577	2.19645e-08	7.31907e-07	248.815	291.212	292.098	241.582	260.316	257.44	273.798	269.246	161.22	185.053	131.9	132.802	168.501	82.5609
PARP1	5275.89	-0.379185	0.0678209	-5.59099	2.25785e-08	7.5071e-07	5939.46	6037	5874.22	5797.96	5851.7	5652.39	5742.33	5965.98	4852.96	4554.89	4207.9	4838.11	4491.61	4055.95
APEH	759.759	0.661083	0.118258	5.59019	2.26824e-08	7.52509e-07	690.262	616.997	598.533	597.597	611.771	586.706	585.531	645.7	980.171	819.857	1024.46	1068.14	780.635	1030.27
ARPC5	3108.12	0.498517	0.0892452	5.58592	2.32465e-08	7.6953e-07	2553.7	2531.82	2688.02	2828.26	2517.15	2548.58	2682.72	2756.3	3851.76	3341.5	4087.9	3878.73	3283.14	3964.08
ELF3	199.679	1.20196	0.215205	5.58517	2.33478e-08	7.71193e-07	204.671	166.217	182.785	167.677	105.379	90.3866	104.736	148.126	237.157	260.012	356.031	249.576	194.83	327.918
BICDL1	107.577	1.3667	0.244772	5.58356	2.35641e-08	7.76637e-07	64.2104	67.8165	81.5367	58.0114	70.0631	54.8776	57.7284	55.6497	186.922	119.465	228.098	161.423	111.895	188.378
ANAPC7	1109.01	-0.399623	0.0715958	-5.58166	2.38241e-08	7.83172e-07	1198.59	1288.51	1220.36	1250.82	1226.96	1241.2	1278.27	1216.11	913.58	1010.77	859.829	999.448	953.085	868.633
SLC44A2	4195.41	0.446514	0.0800012	5.58135	2.38661e-08	7.83172e-07	3468.7	3576.99	3660.19	3628.5	3798.22	3722.8	3678.95	3711.34	4704.59	4352.27	5195.67	5277.73	4456.07	5503.67
NOL10	951.102	-0.499814	0.0895633	-5.58057	2.39737e-08	7.84994e-07	988.573	1111.66	1029.51	1103.81	1057.21	1110.46	1086.12	1013.15	837.643	934.637	777.515	759.031	829.342	676.767
PRKAR2A	5698.3	-0.341886	0.0613328	-5.57428	2.48556e-08	8.1211e-07	5829.77	6422.62	6281.91	6472.65	5791.32	6534.47	6425.17	6375.98	4930.06	4981.22	4864.43	4668.67	5062.94	5135.05
RBBP5	1095.95	-0.43293	0.0776943	-5.57222	2.51508e-08	8.19981e-07	1171.84	1082.4	1116.42	1183.27	1187.09	1264.61	1397.85	1336.41	893.72	932.294	896.523	943.351	1038.65	898.867
E2F1	516.712	-0.789088	0.141622	-5.57179	2.52129e-08	8.20233e-07	731.731	663.538	641.541	610.312	602.657	627.864	628.415	582.685	434.593	370.107	280.659	399.55	367.28	293.033
ATP5F1E	986.068	0.526242	0.0944779	5.57	2.54743e-08	8.25181e-07	963.156	843.052	818.951	808.187	834.492	748.918	860.978	896.124	1092.32	1061.13	1270.4	1260.47	1167.66	1179.11
CDC7	887.634	-0.709145	0.127309	-5.57028	2.54334e-08	8.25181e-07	1088.9	1115.65	1024.14	1099.83	1001.96	1032.99	1035.81	1018.88	675.255	840.939	613.88	568.987	770.104	539.553
TUFT1	1036.41	0.525453	0.0943695	5.56804	2.57619e-08	8.32711e-07	1024.69	1087.72	882.567	936.13	845.314	759.409	736.45	794.645	1383.22	1233.3	1439	1097.9	1074.2	1215.16
EPS8L2	743.689	0.879905	0.158105	5.56533	2.61653e-08	8.43943e-07	476.227	494.661	542.084	457.734	526.897	572.18	571.511	612.965	889.047	859.679	1259.5	985.71	862.253	1301.21
LOC101904249	13.8916	4.67247	0.839963	5.56271	2.65617e-08	8.54902e-07	1.33772	2.65947	4.48004	3.97339	0	0	3.29877	1.63676	14.0191	30.4518	44.6278	11.4484	38.1761	38.3734
HMOX1	3389.26	2.35587	0.423576	5.56186	2.66912e-08	8.5724e-07	1555.76	1477.34	1835.02	1815.84	650.505	807.023	992.104	981.235	5189.42	5703.86	13271.3	2549.57	3243.65	7376.99
PSMC3IP	178.023	-0.985071	0.177581	-5.54718	2.90317e-08	9.30433e-07	247.478	246.001	201.602	212.179	243.797	190.458	196.277	220.144	133.182	169.828	108.098	119.064	115.845	88.375
CNTNAP1	191.981	-0.972931	0.175499	-5.54381	2.95962e-08	9.46515e-07	220.723	200.79	241.026	286.084	232.405	183.194	243.284	227.509	153.042	176.855	183.47	127.078	125.06	87.2122
TMEM63B	997.971	1.17534	0.212074	5.54212	2.98835e-08	9.53682e-07	663.508	686.143	697.094	647.662	676.707	614.952	588.83	621.149	1856.37	1021.31	1661.15	1751.61	908.327	1576.8
EEF1D	3727.9	-0.394037	0.0711159	-5.54077	3.01145e-08	9.59025e-07	4471.99	4420.04	4147.62	3978.95	4368.41	4135.19	3955.22	3995.32	3197.53	3222.04	2903.78	3262.8	3239.7	2891.96
DDIT4L	231.319	0.909867	0.164396	5.53462	3.11908e-08	9.9121e-07	267.543	301.85	185.473	214.563	124.177	129.931	116.282	139.124	368.002	358.395	315.37	216.375	240.904	260.474
ID3	635.623	0.862817	0.155908	5.53412	3.12789e-08	9.91924e-07	438.771	364.347	466.82	449.787	447.72	435.793	594.603	625.241	655.395	769.494	783.465	797.956	1082.09	987.242
SPC24	671.656	-0.916575	0.165635	-5.53369	3.13566e-08	9.92302e-07	1003.29	855.02	802.822	743.818	839.049	815.901	832.939	824.925	467.305	529.393	370.906	453.358	542.364	322.104
DSTN	4315.91	0.326873	0.059094	5.53141	3.17675e-08	1.0032e-06	4192.4	4111.54	3759.65	3692.86	3954.86	3992.34	3777.91	3738.35	4990.81	4770.4	4895.17	5001.82	4645.63	4899
MFGE8	3072.66	1.55685	0.281541	5.52975	3.20685e-08	1.01059e-06	1959.76	1884.23	1268.75	1239.7	2246.58	2112.79	1304.66	1395.33	5132.17	3079.15	5815.5	6194.75	3267.35	6116.48
ITFG1	1262.82	0.678864	0.122857	5.52566	3.28248e-08	1.03013e-06	929.713	897.571	1052.81	1014.8	918.226	962.779	1036.64	1135.91	1490.7	1500.34	1876.35	1489.44	1482.28	1891.92
HYI	37.8906	1.33503	0.241597	5.52585	3.27896e-08	1.03013e-06	30.7675	21.2758	22.4002	25.4297	23.924	20.9826	22.2667	32.7351	50.2352	44.5065	47.603	72.1251	59.2387	56.9786
CCND1	964.851	1.0467	0.189474	5.52422	3.30946e-08	1.03644e-06	469.539	547.851	559.108	587.266	709.176	742.461	685.319	701.35	1752.39	958.061	1399.33	1704.67	1071.56	1619.82
CRYBG3	438.572	-0.666428	0.120648	-5.52374	3.31861e-08	1.03715e-06	484.253	497.321	626.309	608.723	464.239	466.459	493.166	515.578	384.358	363.08	319.337	290.79	335.686	290.707
CCT5	5674.43	-0.320622	0.0580819	-5.52016	3.38685e-08	1.05629e-06	6200.32	6398.69	6138.55	6086.43	6401.95	6307.69	6193.43	6032.26	4990.81	5216.63	4497.49	5095.7	5135.34	4746.67
ALAS1	2401.61	1.39572	0.253273	5.51072	3.57364e-08	1.11225e-06	1304.27	1307.13	1256.2	1176.92	1451.96	1589.84	1381.36	1320.86	2486.06	3159.96	5853.18	3057.88	2909.28	5367.62
MAT2A	2247.34	-0.381403	0.0692717	-5.50589	3.67304e-08	1.14083e-06	2393.18	2510.54	2639.64	2728.92	2386.7	2233.84	2475.72	2437.13	2196.33	2043.79	1926.93	1840.91	1885.11	1764.01
PPDPF	1810.01	0.90109	0.163734	5.50339	3.72567e-08	1.1526e-06	1305.61	1174.16	1528.59	1405.78	1114.74	1162.11	1522.38	1507.45	2095.86	2193.7	2900.81	2373.26	2110.22	2945.45
USP43	82.4781	2.3246	0.422397	5.50336	3.7262e-08	1.1526e-06	25.4166	18.6163	38.5283	37.3498	21.0759	13.7194	37.1111	41.7373	120.331	134.691	240.99	80.139	126.376	218.612
PCNA	3340.91	-0.757245	0.137679	-5.50009	3.79589e-08	1.17176e-06	4003.79	4244.51	3923.62	4207.02	4011.83	3994.77	4124.28	3984.68	2336.52	2870.67	1918	2245.04	2917.18	1990.76
TOB1	699.47	1.23523	0.224714	5.49688	3.8656e-08	1.19084e-06	482.916	484.024	415.747	429.126	480.189	498.74	386.78	351.084	1109.85	798.775	1323.96	960.524	676.638	1394.23
WDR76	594.316	-0.655699	0.119372	-5.49289	3.95409e-08	1.21562e-06	782.564	841.722	729.35	699.316	669.872	664.987	647.383	637.516	477.819	510.654	409.584	414.433	491.023	344.197
ASNSD1	1100.6	0.494311	0.0900355	5.49019	4.01509e-08	1.22688e-06	910.985	873.636	839.559	855.867	982.593	1063.66	968.188	994.329	1309.62	1110.32	1268.42	1529.51	1220.32	1481.44
FAM117B	68.9622	1.35863	0.247445	5.49065	4.00446e-08	1.22688e-06	40.1315	50.5299	43.9044	38.9392	44.4303	41.9652	35.4617	36.827	141.36	78.472	108.098	123.643	72.4029	109.306
PAQR8	629.05	1.41268	0.257298	5.49046	4.00885e-08	1.22688e-06	227.412	239.352	349.443	336.943	320.126	384.143	452.756	544.221	655.395	765.981	1136.52	835.736	1000.48	1558.19
SPATA20	2224.8	0.618011	0.112682	5.48454	4.14543e-08	1.26415e-06	1864.78	1771.21	1813.52	1850.01	1777.78	1693.13	1925.66	1880.63	2910.14	2258.12	3028.74	3118.55	2382.71	2872.19
CCHCR1	232.463	-0.894328	0.163235	-5.47879	4.28244e-08	1.30329e-06	251.491	240.682	287.618	290.852	309.873	249.37	300.188	291.343	219.633	202.622	144.792	137.381	185.615	143.028
SEC24D	1644.67	0.519205	0.0947893	5.47747	4.31451e-08	1.31041e-06	1301.6	1328.41	1447.95	1475.72	1218.98	1344.5	1374.76	1408.43	2257.08	1869.27	2257.17	2021.79	1723.19	1996.58
TSPAN9	2868.01	0.426226	0.0778595	5.4743	4.39239e-08	1.33139e-06	2637.98	2521.18	2671.89	2867.99	2261.39	2294.37	2614.27	2545.16	3197.53	3181.04	3573.2	3186.1	3147.55	3452.44
KLF7	1601.53	0.347485	0.0634903	5.47304	4.42374e-08	1.3382e-06	1373.84	1441.43	1470.35	1531.34	1349.43	1330.78	1416	1340.5	1935.81	2056.67	1984.45	1608.5	1850.88	1731.45
KRT80	1444.4	0.594417	0.108626	5.47215	4.44608e-08	1.34227e-06	1277.52	1386.91	1303.69	1384.33	948.985	796.532	1123.23	986.146	2341.2	2135.14	2171.89	1303.98	1577.07	1484.93
GFM2	625.081	-0.513855	0.0939814	-5.46762	4.5611e-08	1.37425e-06	670.196	712.738	643.333	642.894	783.226	804.602	702.637	708.715	543.242	498.942	462.145	514.035	581.856	482.574
URB1	660.843	-0.715334	0.130885	-5.46537	4.61952e-08	1.38908e-06	791.928	783.214	753.542	767.658	770.694	792.497	749.645	792.19	587.636	612.55	430.41	493.427	544.996	381.408
SRSF6	5079.48	-0.372187	0.0681561	-5.4608	4.73986e-08	1.42243e-06	5484.64	5632.76	5449.52	5721.68	5884.73	5790.39	5658.21	5165.6	4444.07	4775.08	4065.09	4178.68	4537.69	4324.56
CASKIN2	494.907	0.523757	0.0959303	5.45976	4.76767e-08	1.42511e-06	516.359	470.726	476.676	449.787	371.961	351.055	418.943	394.458	592.309	599.667	633.714	559.828	489.707	603.508
CAV1	9657.43	0.742633	0.136013	5.46002	4.76069e-08	1.42511e-06	7287.88	7458.48	8081.98	8065.97	6616.12	7083.24	7747.15	7529.9	12605.5	11051.7	15316.3	11075.2	10306.2	14978.4
LRRC28	319.879	0.597388	0.109478	5.45668	4.85117e-08	1.4472e-06	271.557	307.169	261.634	261.449	273.987	267.932	260.603	270.883	365.666	310.374	409.584	408.709	373.862	434.898
FAM71F1	12.0029	3.81747	0.699926	5.4541	4.92216e-08	1.46548e-06	5.35087	6.64868	2.68802	2.38403	1.70886	3.22809	0.824692	0	26.87	19.9108	36.694	17.1727	13.1642	31.3964
OGG1	154.77	-0.765522	0.140369	-5.45363	4.93507e-08	1.46644e-06	183.267	172.866	182.785	190.723	193.101	185.615	175.659	180.043	137.855	137.033	102.148	98.4565	123.743	103.492
LOC101903478	133.438	1.0042	0.184171	5.45252	4.9661e-08	1.47276e-06	85.6139	101.06	84.2247	89.0038	109.936	106.527	79.1704	93.2951	202.109	152.259	179.503	227.824	144.806	212.798
RANBP3	728.771	-0.381114	0.0699786	-5.44615	5.14722e-08	1.52348e-06	829.384	853.69	845.831	819.312	772.403	757.795	815.62	807.739	637.871	640.66	605.946	628.519	634.513	553.507
SYCE2	218.111	-0.864167	0.158859	-5.43982	5.33339e-08	1.57549e-06	272.894	247.331	251.778	272.574	275.126	250.177	301.837	244.695	172.903	196.766	124.958	154.554	165.868	122.097
TRMT5	442.844	-0.530682	0.0975743	-5.43875	5.36544e-08	1.58186e-06	509.67	476.045	464.132	444.225	584.429	530.214	483.269	500.029	369.171	398.216	348.097	356.046	380.444	355.826
FOSL1	2277.53	-0.433372	0.0796925	-5.43805	5.38674e-08	1.58505e-06	2485.48	2579.69	2721.17	2857.66	2356.51	2295.17	2493.87	2352.84	2220.87	2296.77	1947.75	1657.73	1903.54	1716.34
TDRP	276.512	0.908166	0.167048	5.43657	5.43163e-08	1.59514e-06	204.671	223.396	188.162	187.544	219.873	235.651	189.679	161.22	376.18	319.744	429.418	351.467	322.522	461.643
PTAFR	298.744	0.75175	0.138487	5.42832	5.68864e-08	1.66738e-06	262.192	284.563	247.298	245.555	228.417	217.089	202.049	216.87	432.257	341.997	413.551	399.55	281.713	409.316
VAMP1	49.5522	-1.36608	0.251742	-5.4265	5.74702e-08	1.68123e-06	65.5481	62.4976	55.5524	61.9848	67.7847	79.0883	67.6247	54.0129	25.7018	42.1641	33.7188	28.6211	25.0119	24.4194
CDK2	1559.56	-0.701243	0.129298	-5.42348	5.84506e-08	1.7066e-06	1846.05	1948.06	1954.19	1992.26	1746.45	1690.71	1842.36	1818.44	1262.89	1440.61	1015.53	1039.52	1321.68	915.147
PKIA	168.395	1.10188	0.203275	5.42065	5.93816e-08	1.73043e-06	109.693	127.655	101.249	124.764	109.367	115.404	103.086	104.752	267.532	194.423	304.461	244.996	160.603	289.544
DHX15	3268.51	-0.458283	0.084551	-5.42019	5.9535e-08	1.73156e-06	3475.39	3756.5	3679.01	3759.62	3617.65	3867.26	3678.95	3582.86	2855.23	3005.36	2428.74	2563.3	2976.42	2512.87
PRRG1	942.855	0.790891	0.146032	5.41587	6.09914e-08	1.77051e-06	589.933	646.251	823.431	801.829	604.935	629.478	765.314	777.459	1493.04	1163.03	1305.11	1244.44	1064.98	1290.74
CCT6A	7025.23	-0.3296	0.0608898	-5.41305	6.19594e-08	1.79516e-06	7467.13	8137.98	7564.09	7719.49	7460.87	7908.83	7653.14	7585.55	6219.82	6494.44	5871.03	5826.11	6599.2	5845.54
MCM5	3634.98	-0.840638	0.155361	-5.41087	6.27195e-08	1.8137e-06	5289.33	5183.31	4412.84	4229.27	4675.43	4443.47	3882.65	4041.97	2750.09	2855.44	1986.43	2538.12	2740.78	1860.53
CUBN	466.885	0.806771	0.149129	5.40987	6.30691e-08	1.82032e-06	363.859	381.634	378.115	295.62	342.911	430.143	307.61	338.808	688.106	534.078	614.872	715.527	535.781	609.322
RBL1	923.704	-0.766618	0.141864	-5.40388	6.5214e-08	1.87864e-06	1091.58	1119.64	1155.85	1197.58	1114.17	1060.43	1063.85	1157.19	660.068	791.748	579.169	564.408	831.975	544.204
DACT1	53.9288	1.4691	0.271907	5.40296	6.5549e-08	1.88469e-06	57.5218	54.5191	36.7363	49.27	14.2405	16.1405	23.0914	22.0962	127.34	85.4994	114.049	56.0973	46.0746	52.3273
ATP8B4	12.4839	3.05718	0.566059	5.40083	6.63349e-08	1.90366e-06	2.67543	5.31894	0.896007	0	5.12657	5.64916	4.12346	1.63676	12.8509	10.541	21.818	41.2144	21.0627	41.8618
H1F0	403.703	-0.834734	0.154642	-5.39783	6.74516e-08	1.93204e-06	543.113	485.353	534.02	544.354	498.417	452.74	489.042	487.753	317.767	283.436	205.288	332.005	264.6	213.961
BTG1	1791.95	1.37291	0.254463	5.3953	6.8408e-08	1.95572e-06	1300.26	1441.43	1087.75	1045.8	1011.64	1024.11	834.588	838.019	3424.17	1958.29	3918.32	2623.98	1423.05	3155.92
ILKAP	356.906	-0.66441	0.123387	-5.38475	7.25443e-08	2.07005e-06	457.499	446.791	422.915	362.373	432.91	407.547	413.171	394.458	332.955	298.662	245.949	258.735	284.346	238.38
CCNG2	70.5616	1.9193	0.356694	5.38079	7.41614e-08	2.1122e-06	57.5218	31.9136	35.8403	32.5818	15.3797	19.3686	46.1827	32.7351	100.47	124.15	172.561	87.0081	96.0984	136.051
U2AF2	3783.36	-0.460045	0.0855397	-5.37814	7.52594e-08	2.13944e-06	4593.72	4406.74	4152.99	4156.96	4456.7	4279.64	4188.61	4107.44	3248.94	3320.42	2765.93	3253.64	3291.04	2744.28
DGKI	105.309	1.57375	0.292695	5.37674	7.58462e-08	2.15206e-06	61.535	67.8165	69.8886	53.2434	48.9872	42.7722	88.242	76.9275	96.9657	117.122	179.503	152.264	163.236	255.822
HMGB1	7688.83	-0.667206	0.124129	-5.37508	7.65466e-08	2.16786e-06	9615.51	9473.03	8405.44	8599.2	9797.45	9673.79	9011.41	8593.79	5629.85	6627.96	4702.78	5753.98	6745.32	5014.12
WNT9A	10.4211	4.16189	0.7744	5.37434	7.68637e-08	2.17277e-06	1.33772	5.31894	7.16806	3.97339	1.13924	0	1.64938	0.818378	17.5239	26.9382	30.7436	14.883	15.797	18.6053
C19H17orf75	251.249	-0.784159	0.14598	-5.37169	7.80034e-08	2.20086e-06	274.232	279.244	329.731	335.354	299.05	289.721	310.084	288.887	169.398	243.615	179.503	151.119	200.095	167.447
FANCG	588.229	-0.704202	0.131105	-5.37127	7.8186e-08	2.2019e-06	771.863	699.441	707.846	774.016	678.416	606.882	686.968	709.534	455.622	527.051	380.824	386.957	496.289	353.5
JUNB	768.34	0.56974	0.106259	5.36181	8.23919e-08	2.31603e-06	658.157	605.029	631.685	615.875	615.188	626.25	617.694	637.516	952.133	847.966	1172.22	974.262	830.659	972.125
GAB1	732.871	0.853007	0.159145	5.35992	8.32574e-08	2.336e-06	373.223	384.293	529.54	565.81	541.138	576.215	729.852	702.987	747.687	780.035	877.68	1113.93	1080.78	1257.02
MTHFD1	2955.76	-0.660961	0.123367	-5.3577	8.42898e-08	2.36058e-06	3659.99	3853.57	3373.47	3347.97	3636.45	3647.75	3345.77	3285.79	2269.93	2479.48	1877.34	2270.22	2543.32	1789.59
SRRM1	3151.9	-0.327168	0.0610914	-5.35539	8.5371e-08	2.38643e-06	3341.62	3448	3484.57	3529.16	3596	3462.94	3469.48	3197.4	2730.23	2980.77	2675.68	2681.22	2882.95	2646.6
TARDBP	2134.07	-0.493931	0.0922987	-5.35145	8.72538e-08	2.43456e-06	2288.83	2336.34	2461.33	2502.44	2275.63	2383.14	2450.16	2383.94	1803.8	2170.28	1763.29	1534.09	1906.17	1617.5
MFAP5	25.162	4.12456	0.771575	5.34564	9.00987e-08	2.5093e-06	2.67543	5.31894	5.37604	2.38403	3.41771	3.22809	1.64938	3.27351	28.0383	24.5957	119.999	13.7381	31.594	106.98
FBXO25	170.661	1.13362	0.212095	5.34484	9.0495e-08	2.51107e-06	109.693	127.655	120.961	97.7453	114.493	108.948	112.158	125.212	211.455	180.369	323.303	246.141	194.83	316.29
ATP6V0A1	1012.44	0.863278	0.161513	5.34496	9.04362e-08	2.51107e-06	708.99	712.738	793.862	790.704	704.619	705.338	806.548	815.923	1324.81	1022.48	1653.21	1316.57	1133.43	1684.94
TMEM170B	256.253	-0.652012	0.122013	-5.34378	9.10262e-08	2.5195e-06	264.868	327.115	316.291	357.605	269.43	294.564	305.136	279.067	211.455	215.505	198.346	178.596	197.462	172.099
PALM3	110.828	1.92178	0.359643	5.34357	9.11325e-08	2.5195e-06	44.1447	50.5299	84.2247	57.2168	32.4683	41.1582	53.605	53.1946	112.153	240.101	271.734	92.7323	186.931	231.403
TRIM8	2247.01	1.23128	0.230733	5.3364	9.48127e-08	2.61645e-06	1372.5	1255.27	1835.02	1701.4	1148.35	1079.8	1426.72	1374.88	2697.52	3854.5	4856.49	1969.13	3022.49	3864.08
GYS1	902.927	0.731652	0.137121	5.3358	9.51255e-08	2.62029e-06	862.827	803.16	676.485	642.099	770.125	654.496	677.897	709.534	1066.62	972.116	1303.13	1244.44	995.211	1262.83
P2RX7	134.702	2.08182	0.39025	5.3346	9.57565e-08	2.63287e-06	36.1184	29.2542	70.7846	58.8061	31.8987	47.6144	85.7679	81.0194	170.566	183.882	311.403	182.03	210.627	386.059
POLE	1433	-0.870879	0.163284	-5.33353	9.632e-08	2.63875e-06	1953.07	1932.11	1811.73	1844.45	1747.59	1578.54	1823.39	1731.69	926.431	1163.03	725.945	897.557	1192.67	733.745
ZC3H18	1059	-0.378666	0.0709966	-5.33357	9.62988e-08	2.63875e-06	1177.19	1204.74	1190.79	1145.92	1211.01	1156.46	1139.72	1095.81	920.59	1000.23	924.291	918.164	939.921	801.189
HNRNPD	7258.94	-0.561497	0.105309	-5.33191	9.71863e-08	2.65766e-06	8531.96	8836.09	8299.71	8367.16	8783.52	8600.45	8418.45	8010.28	5128.67	6561.2	4901.12	5467.77	6516.26	5202.5
RNF157	841.839	-0.517031	0.0969938	-5.33056	9.79103e-08	2.66779e-06	1054.12	1042.51	1025.03	964.738	923.352	920.814	881.595	962.413	696.284	741.385	637.681	646.836	742.459	546.53
DHX16	284.123	-0.544006	0.102054	-5.33059	9.78968e-08	2.66779e-06	331.754	295.201	315.395	330.586	328.67	332.494	361.215	303.618	246.503	230.731	220.164	227.824	219.842	233.729
OSTM1	816.778	0.641319	0.120359	5.32838	9.90948e-08	2.6952e-06	592.609	644.922	627.205	679.449	651.074	666.601	688.618	642.427	1054.94	912.384	1178.17	955.944	895.163	1245.39
STIM1	1959.69	0.749108	0.140776	5.32126	1.03052e-07	2.79779e-06	1293.57	1271.23	1756.17	1635.45	1361.96	1287.2	1689.79	1677.67	2658.96	2379.93	2842.29	2665.2	2280.03	2636.13
VPS4A	1188.57	-0.33298	0.0625889	-5.32011	1.03704e-07	2.81043e-06	1228.02	1308.46	1313.55	1297.71	1347.15	1258.96	1353.32	1342.14	963.816	1076.36	990.737	1026.92	1108.42	1024.45
RBM14	1614.29	-0.479297	0.0901384	-5.31735	1.05291e-07	2.84834e-06	1911.6	1857.64	2003.47	1959.67	1719.11	1643.91	1779.68	1828.26	1445.14	1502.68	1197.02	1260.47	1361.17	1130.27
HSPA14	1097.8	-0.444145	0.0835417	-5.31645	1.05814e-07	2.85226e-06	1286.88	1351.01	1242.76	1191.22	1217.28	1294.47	1119.11	1140	970.825	1021.31	902.473	906.716	922.808	802.352
LOC100139670	158.111	1.45616	0.273887	5.31666	1.05692e-07	2.85226e-06	16.0526	26.5947	27.7762	30.9924	138.417	175.124	150.919	181.68	32.7113	51.5339	53.5533	288.501	369.913	669.79
INTS4	731.784	-0.396097	0.0745132	-5.3158	1.06187e-07	2.85722e-06	751.797	764.598	787.59	742.228	880.061	958.744	838.711	855.205	536.232	593.811	521.649	651.416	688.486	674.441
RAB11FIP5	2277.46	0.317274	0.0596927	5.31512	1.06585e-07	2.86282e-06	2354.38	2241.93	2240.91	2168.67	1891.13	1936.86	1985.86	2035.31	2691.67	2461.91	2547.75	2558.72	2277.4	2491.94
EGLN1	1089.39	-0.364111	0.0685639	-5.31053	1.09306e-07	2.93069e-06	1213.31	1248.62	1233.8	1227.78	1200.76	1245.24	1185.91	1135.91	905.403	988.513	884.622	851.763	992.578	937.24
ITGB5	1105.49	0.851102	0.160316	5.3089	1.10289e-07	2.95181e-06	937.739	862.998	785.798	778.784	818.542	862.708	765.314	763.547	1584.16	1201.68	1774.2	1574.16	1074.2	1693.08
LOC786065	119.353	1.62902	0.306893	5.30811	1.1077e-07	2.95943e-06	38.7938	53.1894	47.4884	42.1179	86.5821	84.7374	63.5013	60.56	115.658	131.177	260.825	163.713	193.513	329.081
NCSTN	1596.3	0.483583	0.0911191	5.30715	1.11352e-07	2.96971e-06	1409.95	1445.42	1351.18	1326.32	1413.22	1329.17	1330.23	1352.78	2056.14	1642.06	2003.29	2079.04	1704.76	1904.71
SMARCD1	1358.48	-0.307916	0.0580527	-5.30408	1.13241e-07	3.01475e-06	1504.93	1509.25	1505.29	1514.65	1454.24	1457.48	1506.71	1541.01	1113.35	1192.31	1109.74	1261.62	1229.53	1118.64
TEDC1	653.867	-0.706464	0.133226	-5.30276	1.14066e-07	3.03138e-06	838.748	884.274	845.831	822.491	766.707	742.461	677.072	690.711	550.251	591.468	419.501	446.489	519.984	358.151
CDK4	2667.82	-0.497642	0.0938534	-5.30233	1.14332e-07	3.03311e-06	3258.68	3245.88	3082.26	3017.39	2989.93	3040.06	3041.46	3005.9	2140.25	2282.72	1826.76	2112.24	2431.42	1874.48
PITHD1	598.303	-0.416126	0.0784919	-5.30151	1.14849e-07	3.04148e-06	667.521	704.76	675.589	675.476	672.15	676.286	626.766	625.241	570.112	538.763	480.988	504.876	484.441	473.271
ESR1	1203.56	0.654855	0.1236	5.29817	1.16968e-07	3.09218e-06	969.845	1019.91	1033.99	1000.5	870.947	926.463	891.492	968.96	1487.2	1426.55	1935.85	1223.84	1405.93	1688.43
RCC1	1254.25	-0.558894	0.105504	-5.29737	1.17485e-07	3.10041e-06	1561.12	1555.79	1531.28	1502.73	1441.71	1359.83	1364.86	1396.97	1039.75	1136.09	836.027	1037.23	983.363	812.818
SHMT2	5229.8	-0.669406	0.126393	-5.29623	1.18221e-07	3.11438e-06	6775.54	6868.08	5829.42	5739.16	6552.9	6571.59	5726.66	5830.12	4295.7	4233.98	3153.7	4164.94	4132.23	3343.13
PRPF38A	812.02	-0.518803	0.0980076	-5.29349	1.20002e-07	3.15579e-06	928.375	966.717	835.975	890.038	932.466	1000.71	925.304	954.229	578.289	736.7	621.814	604.477	738.51	654.673
GLTP	753.69	0.581402	0.109866	5.29191	1.21042e-07	3.17763e-06	630.065	658.219	663.045	627.795	557.087	614.952	644.084	653.884	861.009	815.172	1059.17	937.627	810.912	1018.64
CTSD	1763.55	0.899301	0.169953	5.29145	1.21349e-07	3.18014e-06	1434.03	1214.05	1419.28	1303.27	1170.57	1205.69	1330.23	1400.24	2524.61	1813.06	2734.2	2776.25	1715.29	2648.92
SUSD6	244.376	1.33426	0.252195	5.2906	1.21915e-07	3.18945e-06	105.68	94.4112	107.521	109.665	168.038	153.334	229.264	194.774	212.624	226.046	411.567	356.046	408.089	644.207
KLHL11	450.24	-0.457149	0.0864688	-5.28687	1.24425e-07	3.24947e-06	519.034	492.002	539.396	565.81	483.037	476.951	463.477	496.755	377.348	421.641	417.518	326.28	365.964	358.151
DOPEY2	166.36	0.729198	0.138017	5.28338	1.26819e-07	3.30627e-06	153.837	127.655	123.649	150.194	130.443	129.124	123.704	129.304	218.465	180.369	226.114	222.1	180.349	233.729
HMGN2	11458.7	-0.586339	0.111045	-5.2802	1.29045e-07	3.3585e-06	13508.3	13790.7	13493.9	13519	13115.5	13198.9	13456.5	13257.7	8313.35	10589	7686.89	8366.52	10274.6	7850.26
IL1RN	360.144	1.20623	0.228473	5.27953	1.29516e-07	3.35942e-06	295.635	299.19	250.882	244.761	271.708	261.476	198.751	185.772	585.299	329.114	530.575	598.753	363.331	626.765
RAI14	2631.14	0.44936	0.0851138	5.27952	1.29525e-07	3.35942e-06	2022.63	2100.98	2224.79	2330.79	2283.6	2386.37	2393.26	2322.56	3167.16	2752.38	3243.94	3362.4	2836.88	3408.25
EHD1	985.466	0.511238	0.0968572	5.27826	1.30414e-07	3.37666e-06	738.42	755.29	713.222	713.62	825.947	916.778	942.623	956.684	1154.24	988.513	1203.96	1363.51	1129.49	1394.23
RAB11A	1648.97	0.466235	0.0884329	5.2722	1.34801e-07	3.48429e-06	1352.43	1388.24	1414.8	1460.62	1387.59	1446.99	1431.66	1453.44	1955.67	1718.19	2152.05	1848.92	1857.46	2217.52
PVR	4867.58	0.670559	0.127258	5.26931	1.3694e-07	3.53351e-06	2869.4	3026.48	3412.89	3530.75	4195.24	4552.42	4458.28	4388.14	4951.09	5231.86	6528.55	6379.07	6204.27	8417.72
HSPG2	23663.6	0.484671	0.0920016	5.26807	1.37864e-07	3.54768e-06	20401.5	19680.1	23782.7	21676.4	17482.7	17726.3	20538.9	21644.5	30319.9	28021.5	28800.8	28376.1	26150.6	26688.1
CYP2C18	32.5711	2.26383	0.429736	5.26795	1.37959e-07	3.54768e-06	12.0395	19.946	25.0882	15.8935	6.83543	8.87726	8.24692	13.094	57.2448	58.5612	98.1811	24.0417	38.1761	69.7697
PAXBP1	607.025	-0.640147	0.121525	-5.26761	1.38214e-07	3.5482e-06	636.753	615.667	702.47	777.194	733.669	662.566	705.111	693.985	478.987	612.55	531.566	414.433	525.25	408.153
ANP32A	1594.87	-0.489691	0.0929705	-5.26717	1.38544e-07	3.55063e-06	1951.73	2017.21	1817.1	1801.53	1733.35	1789.98	1710.41	1748.06	1372.71	1461.69	1193.05	1260.47	1384.87	1086.08
FAM43A	184.728	0.893318	0.169625	5.26642	1.39109e-07	3.55908e-06	156.513	155.579	160.385	145.426	128.734	108.141	117.931	141.579	279.214	230.731	271.734	295.37	175.083	219.775
TSPAN7	753.652	0.702235	0.133358	5.26581	1.39575e-07	3.56496e-06	631.402	614.338	607.493	590.445	552.53	556.039	574.81	630.151	931.104	857.336	1185.12	925.033	776.686	1118.64
SH3GL1	1392.33	-0.397087	0.075418	-5.26515	1.40074e-07	3.57165e-06	1415.3	1468.03	1602.06	1576.64	1516.33	1505.1	1680.72	1693.22	1136.72	1164.2	1091.89	1216.97	1283.51	1141.9
BAIAP2L1	447.043	0.898951	0.170911	5.25977	1.44237e-07	3.67159e-06	330.416	340.412	301.058	301.183	346.898	358.318	316.682	338.808	431.088	537.592	753.714	601.043	539.731	761.653
HNRNPH1	7315.37	-0.502671	0.0956135	-5.25732	1.46167e-07	3.71445e-06	7921.96	8205.8	8271.04	8546.75	8571.63	8507.64	8372.27	7837.61	5882.2	7098.79	5574.51	5278.87	6630.79	5715.31
TPBG	213.86	0.726883	0.13838	5.25279	1.49812e-07	3.80069e-06	208.684	195.471	183.681	171.65	119.05	125.896	165.763	161.22	328.281	302.176	325.287	226.679	248.803	231.403
SLC35C1	863.787	0.907415	0.172794	5.25143	1.50919e-07	3.82236e-06	652.806	647.581	650.501	653.225	692.657	741.654	648.208	564.681	846.99	988.513	1282.3	1042.95	1051.82	1629.12
CENPU	255.635	-0.837768	0.159604	-5.24903	1.52902e-07	3.86609e-06	326.403	333.764	306.434	321.844	344.619	322.002	283.694	274.975	178.744	209.649	159.668	140.816	225.107	151.168
TCN2	629.191	0.999502	0.190497	5.24682	1.5475e-07	3.90628e-06	426.732	420.196	472.196	481.574	442.024	386.564	457.704	509.849	836.475	660.57	1023.46	968.537	613.45	1109.34
SMAD3	1097.42	0.51811	0.0987904	5.24454	1.56674e-07	3.94471e-06	1066.16	1071.77	1107.46	1117.32	808.859	789.269	830.465	817.56	1396.07	1255.55	1618.5	1094.47	1063.66	1326.79
HASPIN	253.202	-0.680324	0.129724	-5.2444	1.56795e-07	3.94471e-06	346.469	328.445	345.859	311.513	267.721	259.054	267.2	282.34	206.782	243.615	180.495	166.002	197.462	141.865
TMEM229B	2217.58	0.849839	0.16211	5.24237	1.58527e-07	3.96186e-06	1908.92	1741.95	1952.4	1893.72	1350.57	1335.62	1604.03	1536.91	3766.47	2488.85	3593.03	2860.96	1970.68	3041.96
CTNND1	4252.4	0.316418	0.0603511	5.24294	1.58034e-07	3.96186e-06	4059.97	4026.44	4126.11	3970.21	3660.37	3534.76	3899.14	3857.83	5125.16	4597.05	4717.65	4878.18	4366.55	4714.11
TALDO1	3097.52	0.549835	0.104873	5.24285	1.58116e-07	3.96186e-06	2803.85	2616.92	2450.58	2388	2782.02	2601.04	2561.49	2754.66	3070.19	3541.78	4046.25	3490.63	3901.86	4355.96
SEC63	1436.64	0.403729	0.0770097	5.24257	1.58352e-07	3.96186e-06	1224.01	1324.42	1331.47	1335.85	1213.86	1289.62	1294.77	1188.28	1519.91	1706.47	1737.51	1506.61	1658.68	1781.45
SAT1	982.202	0.887024	0.169253	5.24081	1.59871e-07	3.98885e-06	573.88	506.629	447.108	461.707	1077.72	940.182	835.413	763.547	947.46	846.795	1331.89	1748.18	1419.1	1851.22
TMEM106C	887.017	0.367738	0.0702253	5.23655	1.63608e-07	4.07536e-06	842.762	772.576	897.799	866.198	774.112	753.76	741.398	738.995	1015.22	995.541	1106.77	1002.88	974.148	936.077
CDC6	379.698	-0.757981	0.144804	-5.23452	1.65419e-07	4.11366e-06	525.723	537.213	491.908	476.012	402.151	369.617	421.417	465.657	258.186	373.621	257.849	244.996	275.131	216.286
LOC100140586	242.364	-0.759689	0.145364	-5.22611	1.73114e-07	4.29795e-06	264.868	275.255	295.682	274.958	268.291	283.265	329.877	332.261	155.379	215.505	159.668	167.147	209.31	161.633
CENPT	815.827	-0.903923	0.173171	-5.21983	1.79087e-07	4.43894e-06	1087.56	1053.15	1076.1	995.731	1037.85	981.34	1011.9	931.314	612.169	640.66	403.633	511.745	681.904	396.525
DSC2	5853.88	0.650927	0.12472	5.21909	1.79808e-07	4.44952e-06	5123.46	5467.87	4738.09	4625.82	4626.44	4820.35	4236.44	4128.72	9056.36	6378.49	7777.13	7514.75	5975.21	7485.13
SRSF5	1452.78	-0.373925	0.0716782	-5.21671	1.82129e-07	4.49956e-06	1605.26	1668.82	1540.24	1704.58	1688.35	1528.5	1612.27	1475.54	1243.03	1363.3	1255.53	1197.51	1286.14	1169.81
TMEM209	616.025	-0.558685	0.107134	-5.21481	1.84004e-07	4.53848e-06	714.341	688.803	697.99	743.023	682.973	705.338	710.06	715.262	500.016	575.071	456.195	416.723	567.375	451.178
DROSHA	475.113	-0.509336	0.0977955	-5.20817	1.90708e-07	4.69615e-06	519.034	537.213	573.445	514.156	520.632	506.811	527.803	561.407	446.276	443.894	384.791	393.826	400.191	322.104
BAG3	1903.16	0.493167	0.094748	5.20503	1.93961e-07	4.76847e-06	1451.42	1589.03	1552.78	1431.21	1887.72	1911.03	1775.56	1886.36	1700.99	1683.05	1902.14	2725.87	2206.31	2940.79
RAB5B	2959.54	0.448032	0.0861205	5.20239	1.96746e-07	4.82908e-06	2664.73	2654.15	2625.3	2665.35	2406.07	2448.51	2587.06	2600.81	3467.4	3164.65	3879.64	3510.09	3011.96	3747.8
FSTL1	10611.1	0.525061	0.100942	5.20162	1.9756e-07	4.84118e-06	7816.28	8322.81	9546.96	9620.36	7955.87	8155.78	9816.3	9635.58	13416.3	12245.1	13646.2	12823.4	12276.9	13277.2
CSTB	1821.25	0.947003	0.182085	5.20088	1.98344e-07	4.85252e-06	1383.2	1416.17	1296.52	1207.11	1257.15	1306.57	1326.1	1346.23	2518.77	1769.72	3101.13	2567.88	1860.1	3140.8
RHBDF1	260.992	0.94447	0.181633	5.19989	1.99407e-07	4.87063e-06	226.074	200.79	163.073	164.498	197.088	202.563	149.269	166.131	387.863	327.943	436.361	359.481	264.6	408.153
FGFR1	4087.39	0.657806	0.126551	5.19796	2.01483e-07	4.9134e-06	3506.16	3398.8	3568.8	3568.9	3003.03	2961.78	3240.21	3263.69	6159.07	4499.84	5302.77	5893.65	4012.44	4844.35
OTUD3	543.988	-0.689419	0.132645	-5.19747	2.0202e-07	4.91854e-06	600.635	589.073	697.99	783.552	571.328	577.022	691.916	666.978	399.545	409.928	464.129	416.723	333.053	413.967
MSLN	1332.87	0.95895	0.184548	5.1962	2.034e-07	4.94416e-06	1028.7	852.36	1044.74	913.084	842.466	891.761	1011.9	1072.08	2216.19	1541.33	1681.97	2499.19	1417.78	1646.57
SCN9A	247.184	-0.640874	0.123353	-5.19544	2.04233e-07	4.95642e-06	212.697	234.033	267.01	251.118	354.873	380.915	325.753	313.439	142.528	158.115	156.693	201.492	251.436	210.472
CAPN5	471.415	1.34014	0.257997	5.19441	2.05369e-07	4.96008e-06	317.039	303.18	226.69	224.099	357.151	360.739	257.304	279.885	710.303	400.559	779.499	939.916	501.555	941.892
DUSP3	632.691	0.829582	0.159701	5.19458	2.05183e-07	4.96008e-06	511.008	513.278	514.308	543.559	415.822	441.442	483.269	450.108	747.687	802.289	1050.24	661.719	684.536	1038.41
EML1	86.1288	2.07034	0.398531	5.19493	2.04801e-07	4.96008e-06	54.8464	47.8705	33.1523	30.1977	48.9872	47.6144	14.0198	37.6454	101.639	107.753	213.222	119.064	127.692	222.1
THRAP3	4992.66	-0.306934	0.0590945	-5.19395	2.05879e-07	4.96445e-06	5415.08	5659.35	5513.13	5431.62	5643.78	5259.37	5565.02	5454.49	4036.34	4510.38	4112.7	4423.67	4723.3	4148.97
SRRT	2518.65	-0.321281	0.0618682	-5.19299	2.06938e-07	4.98203e-06	2696.84	2721.97	2794.65	2717.8	2930.69	2636.55	2886.42	2808.67	2098.2	2219.47	1984.45	2216.42	2402.46	2146.58
ADGRF1	91.7148	2.0684	0.398362	5.19226	2.07753e-07	4.98575e-06	34.7806	33.2434	46.5924	50.0647	27.3417	19.3686	48.6568	52.3762	133.182	121.807	253.882	112.195	103.997	246.52
PARP11	202.713	1.14363	0.220256	5.19228	2.0773e-07	4.98575e-06	136.447	124.995	125.441	97.7453	146.962	155.755	130.301	149.763	318.935	174.512	312.394	399.55	239.588	325.592
LOC101906870	1323.76	-0.444984	0.085716	-5.19137	2.08751e-07	5.00175e-06	1439.38	1541.16	1484.68	1558.36	1500.95	1380.82	1519.91	1522.18	1136.72	1201.68	980.819	1097.9	1180.83	987.242
USH1C	22.696	3.3225	0.640252	5.18936	2.11016e-07	5.04799e-06	0	3.98921	1.79201	4.76806	1.70886	4.03512	8.24692	4.91027	23.3652	42.1641	84.2969	26.3314	34.2268	77.9096
FANCA	213.732	-0.771366	0.148654	-5.18899	2.11438e-07	5.05008e-06	267.543	263.288	310.018	294.825	229.556	235.651	276.272	234.056	128.509	189.738	133.883	138.526	156.654	133.725
RMI1	597.725	-0.649931	0.125264	-5.18848	2.12022e-07	5.05605e-06	588.595	706.089	641.541	635.742	743.353	798.146	759.541	720.991	411.228	535.249	381.815	484.269	547.629	413.967
EPHB3	63.408	1.50277	0.289705	5.18726	2.13408e-07	5.08107e-06	26.7543	30.5839	33.1523	53.2434	26.7721	24.2107	45.358	40.1005	106.312	85.4994	127.933	96.1668	77.6686	113.957
ATP6V0C	1924.19	0.705653	0.136079	5.18563	2.15289e-07	5.11777e-06	1581.18	1521.22	1600.27	1530.55	1392.72	1509.94	1485.27	1552.46	2571.34	1973.51	2957.33	2539.26	1954.88	2768.7
CASC3	1578.41	-0.371125	0.0715727	-5.18529	2.15681e-07	5.11904e-06	1763.11	1743.28	1832.33	1802.33	1707.72	1668.12	1691.44	1789.79	1330.65	1503.85	1286.27	1322.29	1430.94	1225.62
RNF39	24.679	2.32614	0.448651	5.18473	2.16327e-07	5.12631e-06	8.0263	5.31894	10.7521	11.1255	7.97466	5.64916	9.07161	7.3654	36.2161	52.7051	78.3465	27.4762	25.0119	60.4671
PA2G4	7841.2	-0.409924	0.0790975	-5.18252	2.1891e-07	5.17939e-06	9315.86	9235.01	8304.19	8400.53	9231.81	9071.75	8501.75	8322.09	6563.29	7051.94	5945.41	6312.67	7119.18	6401.37
RAD18	662.048	-0.566267	0.109325	-5.17968	2.22273e-07	5.25072e-06	682.236	805.819	773.254	770.042	747.91	796.532	703.462	797.1	494.175	633.632	520.657	511.745	573.958	458.155
GMPS	2891.16	-0.402222	0.0776648	-5.17895	2.23141e-07	5.26298e-06	3138.28	3344.28	3202.33	3108.78	3301.51	3411.29	3332.58	3282.51	2328.35	2419.75	2039.99	2525.52	2772.37	2268.68
ERLIN1	1078.71	0.557936	0.107749	5.17813	2.24123e-07	5.2779e-06	850.788	864.328	980.232	997.32	803.163	765.058	895.615	852.75	1289.76	1571.78	1568.91	1071.57	1315.1	1275.62
PMF1	458.779	-0.949127	0.183374	-5.1759	2.26814e-07	5.33295e-06	616.687	550.51	552.836	509.388	595.821	589.127	569.037	605.6	276.878	373.621	264.792	288.501	417.304	212.798
MAZ	2581.55	-0.584632	0.113088	-5.16972	2.3444e-07	5.50368e-06	3108.85	3139.5	3203.23	3219.24	2808.22	2817.32	3060.43	2918.34	1966.18	2349.48	1745.44	1893.57	2264.24	1647.73
SRSF4	1227.34	-0.555125	0.10739	-5.16924	2.35051e-07	5.50947e-06	1306.95	1315.11	1485.58	1478.89	1440	1300.92	1599.08	1468.17	919.422	1062.3	839.994	969.682	1096.57	900.03
C16H1orf116	71.3453	1.16361	0.225262	5.16556	2.39717e-07	5.61012e-06	34.7806	49.2002	50.1764	48.4753	46.7088	49.2284	54.4297	49.1027	88.7879	71.4447	122.974	130.512	85.5671	117.446
CCT7	4679.33	-0.284777	0.0551409	-5.16453	2.41038e-07	5.62361e-06	5139.51	5221.87	4820.52	5048.58	5166.44	5256.14	4848.36	4996.2	4252.47	4296.05	3982.78	4172.95	4358.65	3950.13
TCP1	7643.96	-0.38674	0.0748829	-5.16459	2.40964e-07	5.62361e-06	8574.76	9022.25	8191.3	8263.85	8564.22	8819.96	8354.13	8318.81	6320.29	7008.61	6036.65	6110.03	7215.28	6215.32
PLEKHM1	615.138	0.754046	0.146062	5.16252	2.43647e-07	5.67569e-06	541.775	485.353	561.797	519.719	393.607	422.073	439.561	447.653	797.923	818.686	1031.4	568.987	684.536	898.867
RNF40	1141.51	-0.377115	0.0730586	-5.16182	2.44559e-07	5.68815e-06	1380.52	1243.3	1309.96	1258.77	1213.86	1205.69	1295.59	1279.12	940.45	1041.22	928.258	996.014	1005.74	882.587
CTTNBP2	421.257	-0.521023	0.100993	-5.15903	2.48238e-07	5.76015e-06	528.398	507.959	488.324	507.799	481.328	458.389	411.521	402.642	424.079	391.189	378.84	337.729	281.713	297.684
CREB3	315.966	0.998653	0.193579	5.15889	2.48417e-07	5.76015e-06	206.008	195.471	245.506	271.78	206.202	168.668	239.161	256.971	398.377	406.415	525.616	431.606	335.686	536.064
DHX58	37.0514	1.2345	0.23933	5.15816	2.4939e-07	5.77383e-06	5.35087	10.6379	11.6481	7.15209	37.5948	37.1231	31.3383	50.7394	14.0191	21.082	15.8677	90.4426	86.8835	98.8405
RAB43	810.595	0.440115	0.0854153	5.15264	2.56839e-07	5.93718e-06	840.086	765.927	727.558	720.772	669.302	703.724	672.948	621.967	1046.76	905.356	960.985	958.234	837.241	917.472
TMEM43	1154.94	0.532713	0.103446	5.14968	2.60938e-07	6.02272e-06	987.235	944.112	981.128	1044.21	967.213	943.41	959.116	1020.52	1401.91	1184.11	1518.34	1547.83	1197.94	1472.14
ILF2	4398.71	-0.484409	0.0941071	-5.14742	2.64091e-07	6.08618e-06	5112.75	5120.81	4775.72	4755.35	5292.9	5053.58	5014.95	4946.28	3465.06	4037.21	3117	3449.41	4086.16	3354.76
CYSTM1	1091.35	0.689853	0.134079	5.14513	2.6734e-07	6.15167e-06	898.946	815.128	909.447	874.94	780.378	751.339	988.805	996.784	1245.37	1174.74	1590.73	1355.49	1326.95	1569.82
BCAM	756.228	0.962324	0.18714	5.14228	2.7143e-07	6.23628e-06	675.547	626.305	536.708	459.323	579.872	607.689	454.405	504.939	872.691	867.877	1264.45	1047.53	829.342	1260.51
MAPK4	364.097	1.37947	0.268305	5.14141	2.72683e-07	6.25554e-06	294.298	257.969	182.785	181.981	275.126	217.089	188.854	162.857	802.596	405.244	479.997	697.21	419.937	531.413
HOXA10	376.957	0.526222	0.102359	5.14094	2.73362e-07	6.26162e-06	353.157	292.542	379.907	339.327	307.025	313.125	319.98	332.261	396.041	433.353	436.361	472.82	491.023	410.479
NCAPD3	461.148	-0.626618	0.121915	-5.13977	2.75068e-07	6.29114e-06	552.477	615.667	536.708	573.757	508.1	526.179	501.413	496.755	372.675	439.209	343.138	299.949	402.823	287.219
GLB1	2631.13	1.01101	0.196748	5.13862	2.76768e-07	6.32045e-06	1830	1581.06	2114.58	2018.48	1728.79	1520.43	2088.94	1938.74	4569.07	2806.25	3642.62	4768.27	2755.26	3473.37
NUP54	963.838	-0.583645	0.113594	-5.138	2.77673e-07	6.33153e-06	1137.06	1135.59	1082.38	1090.3	1123.86	1179.06	1100.14	1094.99	755.865	892.473	648.59	726.976	874.1	652.347
UBE2H	1563.73	0.927164	0.180468	5.13755	2.78346e-07	6.33731e-06	1039.41	1071.77	1317.13	1254.8	943.289	981.34	1231.26	1211.2	1787.44	2068.38	2759.98	1641.71	1998.32	2586.13
JUND	1141	0.533544	0.103868	5.13675	2.79534e-07	6.35477e-06	1076.86	1021.24	1015.18	1042.62	862.403	880.462	857.679	966.504	1491.87	1239.16	1650.24	1265.05	1166.34	1438.42
PHB	3341.99	-0.367094	0.0715079	-5.13362	2.84224e-07	6.45168e-06	4041.24	3998.51	3523.1	3536.31	3848.91	3729.25	3537.1	3537.85	2893.78	2945.63	2671.72	2778.53	2973.78	2772.18
ARPC3	3211.93	0.3507	0.0683189	5.13327	2.84746e-07	6.45382e-06	2926.92	2823.03	2763.29	2809.18	3048.03	2852.83	2834.47	2855.32	3813.21	3342.67	3813.2	3918.8	3395.04	3771.05
CYB5R1	830.304	0.773114	0.150702	5.13009	2.89597e-07	6.55391e-06	620.701	586.413	743.686	708.852	533.163	557.653	677.072	751.271	1182.28	907.699	1130.57	1228.42	935.972	1060.5
NUP88	1017.41	-0.59192	0.115435	-5.12772	2.93266e-07	6.62701e-06	1201.27	1241.97	1137.03	1127.65	1223.54	1288.01	1094.37	1131.82	816.615	885.445	735.863	794.521	921.491	644.207
TTC26	391.81	-0.792565	0.154602	-5.12648	2.95215e-07	6.6611e-06	460.175	440.142	482.052	484.753	442.024	518.109	462.652	484.48	304.916	337.313	240.99	239.272	359.382	229.077
PDIA6	3916.3	0.477138	0.0930786	5.12618	2.95673e-07	6.66146e-06	3346.97	3309.71	3139.61	3321.75	3494.04	3356.41	3308.66	3323.43	5007.17	4115.68	5031.04	5182.71	4046.66	4844.35
S1PR2	144.449	1.10444	0.215465	5.12582	2.96243e-07	6.66435e-06	104.342	102.39	86.9127	79.4677	110.506	111.369	103.911	93.2951	199.773	130.006	225.122	247.286	159.286	268.614
TMEM236	1486.84	0.83972	0.163899	5.12339	3.00084e-07	6.73631e-06	767.849	777.895	1115.53	1078.38	1177.4	1154.85	1369.81	1342.14	1466.17	1905.58	1890.23	1863.8	2293.2	2612.88
ZFAND6	1456.77	0.702491	0.137119	5.12324	3.00334e-07	6.73631e-06	1087.56	1109	1105.67	1211.88	1165.44	1162.92	1100.96	1118.72	1810.81	1637.37	2334.53	1704.67	1573.12	2272.17
BCS1L	376.246	-0.484009	0.094483	-5.12271	3.01169e-07	6.74502e-06	437.433	466.737	453.38	438.662	441.455	381.722	409.047	396.913	311.926	331.456	321.32	263.314	319.889	294.196
H2AFZ	6521.26	-0.484701	0.0946418	-5.12143	3.03223e-07	6.78097e-06	7860.42	7828.15	6998.71	7128.25	7673.34	7803.92	7226.77	6894.02	5779.39	5667.55	4570.88	5334.97	5667.17	4864.11
MGC152281	14.0448	2.62078	0.511827	5.12045	3.04808e-07	6.80632e-06	5.35087	0	7.16806	4.76806	5.69619	4.84214	4.12346	4.91027	28.0383	14.0547	26.7767	44.6489	27.6447	18.6053
APMAP	1540.88	0.326792	0.0638588	5.11742	3.09746e-07	6.90072e-06	1397.91	1267.24	1429.13	1374.79	1498.1	1365.48	1385.48	1347.05	1746.55	1685.39	1807.92	1783.67	1682.38	1801.22
DNASE2	474.12	0.790253	0.154428	5.11729	3.09949e-07	6.90072e-06	414.692	340.412	370.947	363.962	358.29	364.775	378.533	354.358	630.861	468.49	706.111	721.251	487.074	677.929
SLC12A7	420.535	-0.548543	0.107203	-5.11686	3.10667e-07	6.90651e-06	512.346	476.045	434.563	482.369	532.594	501.969	463.477	477.114	311.926	329.114	350.08	286.211	373.862	355.826
CELSR2	874.002	-0.63941	0.125006	-5.11503	3.13697e-07	6.9636e-06	1177.19	1093.04	1058.18	1066.46	1016.2	974.884	921.181	1007.42	616.842	782.378	631.731	538.076	778.002	574.438
FAM81A	338.35	-0.567121	0.110893	-5.11413	3.15185e-07	6.98636e-06	349.144	393.602	404.995	445.019	377.088	401.091	383.482	367.452	274.541	293.977	270.742	225.534	290.928	259.311
MCM7	4255.48	-0.766248	0.149862	-5.11303	3.1704e-07	7.01717e-06	5756.2	5720.52	4948.65	4877.73	5352.14	5307.79	4841.76	4779.33	3268.8	3463.31	2315.69	3103.67	3470.07	2371.01
PNN	1987.19	-0.557262	0.109001	-5.11243	3.18037e-07	7.02894e-06	2208.57	2311.08	2333.2	2558.86	2251.7	2161.21	2299.24	2159.7	1516.4	1984.05	1512.39	1363.51	1706.08	1454.7
PCLAF	1725.35	-0.92131	0.180315	-5.10943	3.23128e-07	7.13101e-06	2104.23	2138.21	1932.69	2216.35	2183.35	2284.68	2239.86	2083.59	976.667	1564.76	947.101	911.295	1494.13	1077.94
PCIF1	315.826	-0.570312	0.111633	-5.10879	3.24228e-07	7.14486e-06	403.99	404.239	369.155	363.167	349.746	366.389	372.761	355.176	276.878	213.163	218.18	267.893	242.221	218.612
MAP1LC3C	9.36928	2.34843	0.459754	5.10802	3.2555e-07	7.16353e-06	1.33772	3.98921	2.68802	1.58935	5.69619	7.26321	3.29877	7.3654	1.16826	4.6849	1.98346	30.9108	28.9612	30.2336
HIST1H2BD	54.1955	1.82102	0.356689	5.10534	3.30196e-07	7.25518e-06	33.4429	33.2434	19.7122	33.3764	34.1771	32.2809	18.1432	24.5513	72.4322	56.2188	111.074	124.788	51.3402	113.957
LOC112442022	37.3577	1.64034	0.321471	5.10262	3.34986e-07	7.34974e-06	13.3772	23.9352	20.6082	30.9924	14.8101	12.1053	27.2148	19.6411	47.8987	67.931	73.3879	49.2283	57.9223	63.9556
METTL3	267.823	-0.577146	0.11317	-5.09981	3.39987e-07	7.42706e-06	255.504	284.563	269.698	288.468	344.05	334.915	312.558	305.255	241.83	233.074	226.114	241.562	231.689	180.239
DBI	2388.66	0.416299	0.0816289	5.0999	3.39829e-07	7.42706e-06	2290.17	2132.9	1965.84	1902.46	2160.56	2008.68	2075.75	2198.98	2574.85	2659.85	3019.81	2785.4	2717.08	2948.93
ATL3	5767.02	0.502604	0.0985503	5.09997	3.39703e-07	7.42706e-06	4526.83	4682	5217.45	5128.85	4678.85	4927.68	4956.4	4925.82	6740.87	6373.8	7874.32	6474.09	6314.85	7916.54
DHX38	995.106	-0.591918	0.116164	-5.09554	3.47751e-07	7.5857e-06	1238.73	1276.55	1040.26	1065.66	1269.11	1203.27	1078.7	1099.08	868.018	799.946	677.351	848.329	768.787	697.697
NASP	3138.18	-0.652179	0.128006	-5.09489	3.4894e-07	7.60065e-06	3886.07	3791.07	3653.02	3746.9	4006.7	3711.5	3623.7	3463.38	2313.16	2682.1	1988.42	2376.69	2809.23	1882.62
ARHGAP6	95.4063	0.873992	0.171618	5.09267	3.53061e-07	7.67934e-06	74.9121	82.4436	59.1365	83.4411	62.0885	68.597	63.5013	55.6497	151.874	127.663	162.643	114.484	121.11	108.143
PSMD11	2411.96	-0.220637	0.0433381	-5.09107	3.56041e-07	7.7219e-06	2600.52	2626.23	2627.99	2603.36	2577.53	2626.05	2562.32	2510.78	2076	2119.92	2218.5	2166.04	2280.03	2172.16
UGCG	1039.4	0.742318	0.145801	5.0913	3.55616e-07	7.7219e-06	569.867	569.127	716.806	761.301	778.099	900.638	981.383	952.592	1238.36	1099.78	1453.87	1337.18	1430.94	1761.69
OTOG	7.10299	3.61931	0.711196	5.08904	3.59878e-07	7.79392e-06	1.33772	2.65947	2.68802	3.97339	0.569619	0.807023	1.64938	2.45513	11.6826	10.541	12.8925	20.6072	17.1134	10.4655
DCLK1	13.3887	4.02836	0.791744	5.08796	3.61936e-07	7.82724e-06	0	0	3.58403	0.794677	1.13924	4.03512	0.824692	0	40.8892	14.0547	49.5864	25.1866	17.1134	30.2336
RRP12	1804.75	-0.605105	0.11895	-5.08704	3.63689e-07	7.84642e-06	2362.41	2365.6	1921.04	1891.33	2312.08	2241.91	1971.01	1840.53	1512.9	1442.95	1278.34	1451.66	1427	1247.72
ECM2	90.9479	1.85443	0.364547	5.08695	3.63862e-07	7.84642e-06	14.7149	26.5947	49.2804	42.9126	30.1898	30.6669	58.5531	67.9254	113.321	144.061	189.42	145.395	147.439	212.798
SCEL	50.2142	6.45755	1.27017	5.08402	3.69534e-07	7.95058e-06	0	1.32974	0	0	1.13924	0	1.64938	1.63676	53.74	32.7943	319.337	40.0695	21.0627	230.24
E2F8	1364.98	-0.716211	0.140878	-5.08391	3.69746e-07	7.95058e-06	1443.4	1405.53	1586.83	1619.55	1799.43	1694.75	1862.15	1734.14	861.009	1145.46	719.003	1050.97	1247.96	939.566
LOC112447334	6.45035	6.38773	1.25683	5.08239	3.72711e-07	7.98024e-06	0	0	0.896007	0	0	0	0	0	8.17783	21.082	25.7849	8.0139	6.58208	19.7681
ISY1	464.794	-0.512838	0.100903	-5.08247	3.72567e-07	7.98024e-06	569.867	573.116	497.284	510.977	530.315	536.671	531.926	492.664	376.18	438.038	349.088	365.205	396.241	339.546
DCLRE1A	493.537	-0.564112	0.110987	-5.08268	3.72156e-07	7.98024e-06	585.92	530.564	543.876	552.301	581.581	606.075	578.109	563.044	350.478	448.579	384.791	353.757	469.961	360.477
GYG1	527.713	0.790839	0.155674	5.0801	3.7724e-07	8.05438e-06	367.872	434.823	361.987	373.498	444.303	408.354	411.521	404.279	703.293	530.565	783.465	830.011	550.262	783.747
MEF2D	1279.08	0.820987	0.161604	5.08025	3.76943e-07	8.05438e-06	1087.56	1073.1	1163.02	1204.73	763.289	802.181	849.432	977.962	1697.48	1515.56	2279.98	1358.93	1255.86	1877.97
CAPN15	440.41	-0.513191	0.101039	-5.07913	3.79163e-07	8.08399e-06	541.775	521.256	498.18	486.342	455.126	493.898	509.659	479.57	407.723	404.072	351.072	382.378	337.003	297.684
BACE2	1115.92	0.960747	0.189217	5.07748	3.82477e-07	8.14314e-06	731.731	640.932	808.198	795.472	718.289	752.146	879.121	899.397	1254.71	1307.09	2095.52	1447.08	1316.42	1976.81
ATRNL1	20.3122	3.45714	0.681454	5.07319	3.91211e-07	8.31737e-06	1.33772	2.65947	4.48004	0	3.98733	4.84214	3.29877	4.91027	40.8892	11.7122	66.4458	45.7937	18.4298	75.5839
SLC12A2	12590.2	0.540945	0.106634	5.07289	3.91819e-07	8.31858e-06	9148.64	10000.9	10648.1	10725.8	9845.29	11672	10166.8	10031.7	16625.5	14579.4	17300.7	13857.2	14022.5	17637.8
CHD8	2082.34	-0.240048	0.0473324	-5.07154	3.94604e-07	8.36593e-06	2254.05	2324.38	2280.34	2323.64	2172.53	2182.19	2132.65	2077.86	2072.5	1934.86	1956.68	1861.52	1827.19	1752.38
MZF1	146.945	-0.899645	0.177442	-5.07009	3.97623e-07	8.41811e-06	210.022	163.557	165.761	162.909	197.658	175.931	169.062	188.227	86.4513	130.006	112.065	90.4426	123.743	81.398
IPO11	946.772	-0.460786	0.0908984	-5.06924	3.99408e-07	8.44408e-06	1129.03	1075.76	1064.46	1037.05	1065.19	1143.55	1016.02	1102.36	759.37	821.028	680.326	753.307	889.897	717.466
LOC101906324	46.4864	2.32528	0.458899	5.06709	4.03949e-07	8.52812e-06	24.0789	30.5839	9.85608	15.0989	13.1012	21.7896	9.8963	11.4573	153.042	53.8763	97.1894	106.47	47.391	56.9786
PHGDH	3749.14	-0.615066	0.12149	-5.06268	4.13401e-07	8.7155e-06	5183.65	4994.49	4152.1	4084.64	4505.69	4533.05	4118.51	4039.51	3151.97	2911.66	2391.06	3060.17	2886.9	2474.5
LOC513659	32.7204	2.05628	0.406188	5.06239	4.14039e-07	8.71676e-06	0	0	0	0.794677	27.9113	29.0528	23.0914	31.0984	0	0	0	129.367	53.9731	162.796
SF3B2	4323.18	-0.468887	0.0926334	-5.06175	4.1542e-07	8.73365e-06	5167.6	5308.3	4784.68	4717.2	5271.25	4929.3	4648.79	4660.66	3590.07	3788.91	3082.29	3631.44	3793.91	3150.1
RAD54B	348.229	-0.674077	0.133249	-5.05878	4.21955e-07	8.8587e-06	365.197	384.293	416.643	431.51	453.417	421.266	430.489	436.195	224.306	286.95	204.296	269.038	322.522	229.077
SDC3	86.096	1.40982	0.278708	5.05843	4.22729e-07	8.86263e-06	42.8069	54.5191	69.8886	71.5209	42.7214	37.9301	54.4297	58.1048	128.509	89.013	172.561	127.078	93.4656	162.796
OPTN	1561.37	0.748568	0.148093	5.05472	4.31016e-07	9.0174e-06	1166.49	1171.5	1206.03	1239.7	1184.24	1261.38	1298.89	1310.22	2008.24	1453.49	2192.71	2226.72	1644.2	2495.43
FAM210B	739.449	1.29508	0.256231	5.05436	4.31847e-07	9.0174e-06	543.113	563.808	430.979	408.464	480.189	517.302	411.521	416.554	901.898	771.837	1547.1	978.841	780.635	1600.05
LOC112444888	266.597	0.955584	0.189062	5.05433	4.31903e-07	9.0174e-06	179.254	218.077	205.186	160.525	174.873	171.896	209.472	202.139	415.901	279.923	414.542	435.04	272.498	393.036
FUT11	492.831	-0.556279	0.110096	-5.05268	4.35646e-07	9.08298e-06	597.959	599.711	600.325	584.882	530.885	542.32	550.894	513.123	413.565	460.291	413.551	384.667	422.57	284.893
MAPK8IP3	299.011	0.69645	0.137847	5.05235	4.3641e-07	9.08635e-06	246.14	219.406	313.603	250.323	212.468	213.054	246.583	261.881	350.478	329.114	410.576	393.826	351.483	387.222
MFSD6	76.8571	8.84319	1.75106	5.05018	4.41395e-07	9.17749e-06	1.33772	1.32974	0	0.794677	0	0	0.824692	0.818378	9.34609	86.6706	442.311	3.43453	100.048	429.084
GEN1	335.363	-0.709241	0.140481	-5.04867	4.44896e-07	9.23755e-06	350.482	372.326	385.283	378.266	426.075	376.073	435.437	429.648	238.325	310.374	226.114	255.3	306.725	204.658
HAUS4	414.072	-0.639413	0.1267	-5.04668	4.49553e-07	9.32143e-06	494.955	527.905	526.852	441.046	457.974	511.653	489.867	450.108	345.805	357.223	273.717	329.715	334.37	255.822
ATP6V1D	1283.62	0.470588	0.0932776	5.04503	4.53461e-07	9.38956e-06	1063.48	1073.1	1138.83	1087.12	1090.82	1094.32	1162.82	1118.72	1424.11	1387.9	1690.9	1536.38	1363.81	1738.43
AKR1B1	2825.47	0.343782	0.0681577	5.04392	4.56101e-07	9.43129e-06	2599.18	2623.57	2443.41	2318.87	2670.94	2542.12	2446.04	2552.52	3316.69	3090.86	3233.03	3492.92	3015.91	3210.57
CDK18	52.3498	1.18697	0.235427	5.04179	4.61208e-07	9.52385e-06	53.5087	54.5191	29.5682	41.3232	27.3417	29.0528	32.9877	36.827	64.2544	67.931	81.3217	74.4148	72.4029	67.4441
CLMN	72.5858	2.13578	0.423782	5.0398	4.6601e-07	9.58369e-06	29.4298	26.5947	44.8004	36.5552	19.367	24.2107	31.3383	31.0984	64.2544	134.691	226.114	68.6906	89.5163	189.541
LOC784007	97.259	5.17324	1.02639	5.04024	4.64949e-07	9.58369e-06	6.68858	7.97841	5.37604	4.76806	6.26581	9.68428	4.12346	3.27351	281.551	11.7122	387.766	264.459	14.4806	353.5
LAMB1	16212.5	0.472839	0.0938202	5.03985	4.65907e-07	9.58369e-06	13555.1	13826.6	13664.1	14135.7	14186.4	13787.2	13531.5	13878.1	21771.7	16926.5	20066.6	21574.6	16880.4	19190.2
EPS8L1	43.4751	2.65879	0.527608	5.03934	4.67144e-07	9.59392e-06	17.3903	19.946	12.5441	9.53613	13.1012	19.3686	9.07161	12.2757	74.7687	29.2806	136.859	70.9803	38.1761	145.354
GSN	1214.83	1.39022	0.27599	5.03721	4.7236e-07	9.68788e-06	825.371	691.462	802.822	737.46	611.771	670.636	735.625	774.186	2415.96	1037.7	2217.5	2451.11	1034.7	2001.23
LBR	854.413	-0.961408	0.19094	-5.03514	4.7749e-07	9.76654e-06	876.204	933.474	1134.35	1154.67	974.048	1141.13	1218.89	1150.64	516.372	705.077	428.427	446.489	742.459	539.553
SDF4	866.398	0.67533	0.134122	5.0352	4.77355e-07	9.76654e-06	741.095	611.678	712.326	638.126	724.555	656.11	705.936	714.444	1139.05	897.158	1235.69	1222.69	900.429	1230.27
MRTO4	1413.36	-0.487554	0.0969751	-5.02762	4.96606e-07	1.01438e-05	1666.8	1741.95	1521.42	1526.57	1744.17	1624.54	1572.69	1521.36	1196.3	1187.62	1024.46	1252.46	1203.2	1003.52
FBXL20	270.05	0.840388	0.167275	5.02398	5.06109e-07	1.03239e-05	192.631	208.768	245.506	215.358	198.227	192.072	188.854	206.231	368.002	283.436	428.427	377.798	267.233	408.153
BCO2	86.6328	0.87237	0.173668	5.02322	5.08125e-07	1.03511e-05	76.2499	63.8273	67.2005	64.3689	63.7973	58.1057	57.7284	62.1967	128.509	119.465	119.007	136.236	106.63	89.5378
TMEM150A	43.2932	1.47545	0.293782	5.02227	5.10655e-07	1.03886e-05	34.7806	30.5839	17.0241	23.0456	19.9367	26.6318	18.9679	29.4616	59.5813	60.9037	88.2638	53.8076	60.5552	82.5609
EXOSC2	714.867	-0.519767	0.103523	-5.02076	5.14664e-07	1.04561e-05	822.696	815.128	795.654	791.498	827.656	844.953	795.003	831.472	580.626	678.139	497.848	589.594	633.196	504.668
CYB561	209.559	0.650921	0.129702	5.01858	5.20541e-07	1.05612e-05	195.307	192.812	193.538	164.498	146.962	178.352	159.99	166.131	254.681	241.272	276.692	250.721	219.842	293.033
USP5	2884.41	-0.298514	0.0594911	-5.01779	5.22688e-07	1.05906e-05	3357.67	3243.22	3118.11	3131.82	3124.36	3052.97	3042.29	3134.39	2635.6	2631.74	2373.21	2577.04	2619.67	2339.61
NOV	31.8665	3.37544	0.672924	5.01608	5.27368e-07	1.06711e-05	1.33772	5.31894	9.85608	16.6882	3.98733	1.61405	17.3185	9.00216	21.0287	46.849	67.4375	52.6628	69.7701	123.26
SMG5	2232.8	-0.440574	0.0878875	-5.01293	5.36075e-07	1.08327e-05	2489.49	2446.71	2770.45	2686.01	2293.29	2333.91	2606.03	2622.08	1834.17	2020.36	1709.74	1743.6	1981.21	1722.15
NBR1	1277.34	0.513925	0.102585	5.00975	5.4501e-07	1.09986e-05	1142.41	1170.17	1105.67	1093.48	1021.9	1042.67	1019.32	1114.63	1582.99	1341.05	1755.36	1554.7	1295.35	1643.08
MYBL2	3756.9	-0.832144	0.166242	-5.00561	5.56856e-07	1.12226e-05	5036.5	4958.58	4659.24	4559.06	4608.22	4468.49	4646.31	4415.15	2599.38	3136.54	1866.43	2571.32	3131.75	1939.6
UBP1	2583.53	-0.274787	0.054908	-5.0045	5.60059e-07	1.12721e-05	2727.6	2928.08	2839.45	2832.23	2729.04	2785.04	2687.67	2639.27	2442.83	2502.91	2329.57	2176.35	2405.09	2144.26
MYO1E	3740.37	0.352504	0.0704564	5.00315	5.64017e-07	1.13109e-05	2913.55	3010.52	3094.81	3203.34	3472.97	3879.36	3610.5	3575.49	3746.61	3761.97	4180.14	4768.27	4253.34	4894.35
P2RX4	241.409	1.01356	0.202588	5.00307	5.64234e-07	1.13109e-05	200.658	176.855	163.969	188.338	190.253	170.282	174.01	143.216	391.368	227.217	327.27	428.171	252.752	345.36
SORBS2	2409.85	0.489909	0.0979181	5.00326	5.63698e-07	1.13109e-05	1891.53	1933.43	2287.51	2229.86	1717.4	1929.59	2108.74	2165.43	3203.37	2960.85	2972.21	2937.67	2711.82	2688.46
SARAF	1057.97	0.52415	0.104808	5.00104	5.70208e-07	1.14155e-05	902.959	1009.27	888.839	949.639	882.34	862.708	889.842	856.842	1304.95	1096.27	1404.29	1347.48	1064.98	1351.21
ASGR1	248.999	0.813286	0.162673	4.99953	5.74707e-07	1.14751e-05	212.697	211.428	172.033	178.008	221.012	200.142	169.062	178.406	320.104	269.382	340.163	389.247	258.018	366.291
FOXK1	890.251	0.553279	0.110666	4.99955	5.74647e-07	1.14751e-05	793.266	789.863	798.342	832.027	713.163	668.215	689.442	738.177	1186.95	965.089	1199.99	1156.29	847.772	1084.92
FURIN	2238.14	0.61191	0.122486	4.99575	5.86069e-07	1.16865e-05	2029.32	1827.06	1842.19	1785.64	1823.92	1827.91	1689.79	1875.72	2725.55	2295.6	3340.14	2855.24	2366.92	3048.94
GRIA3	913.703	1.23342	0.246939	4.99481	5.88936e-07	1.17282e-05	536.424	628.965	604.805	632.563	494.999	540.706	588.005	616.239	2165.96	963.918	1071.07	1761.91	1047.87	1138.41
HSBP1	948.792	0.630841	0.126316	4.99416	5.90931e-07	1.17524e-05	869.516	841.722	795.654	766.863	839.049	785.234	716.657	756.181	1158.92	945.178	1211.89	1330.31	953.085	1312.83
EPN2	721.219	1.18868	0.238083	4.99269	5.9543e-07	1.18263e-05	442.784	476.045	560.004	569.784	385.062	430.143	542.647	519.67	658.899	1004.91	1299.16	757.886	996.527	1453.54
IFI27L2	162.457	0.811091	0.162479	4.99197	5.97668e-07	1.18552e-05	121.732	123.665	113.793	106.487	130.443	139.615	128.652	125.212	195.1	179.197	223.139	280.487	168.501	238.38
TIMM44	927.281	-0.419184	0.0840024	-4.99014	6.03348e-07	1.19522e-05	1099.6	1086.39	982.024	1099.83	1045.25	1054.78	983.032	973.87	822.456	837.425	720.987	819.708	763.521	693.046
CLASRP	181.417	-0.662123	0.132694	-4.98983	6.04327e-07	1.19558e-05	196.644	202.12	213.25	213.768	213.607	209.826	240.81	217.689	114.49	142.889	155.701	129.367	160.603	129.074
CREB3L2	391.069	0.951971	0.191035	4.98324	6.25289e-07	1.23544e-05	235.438	202.12	325.251	331.38	218.164	218.703	291.116	323.259	588.804	534.078	683.301	468.241	531.832	523.273
TCF19	254.808	-0.610124	0.122527	-4.97951	6.37445e-07	1.25781e-05	300.986	293.871	306.434	286.084	259.746	276.002	322.454	333.08	198.604	217.848	188.428	206.072	197.462	180.239
CD24	1367.76	1.54708	0.310807	4.97761	6.43743e-07	1.26858e-05	1087.56	1175.49	596.741	513.361	759.872	898.217	486.568	547.495	3036.31	1649.08	2497.17	2443.1	1420.41	2037.28
PSPH	1591.89	0.46017	0.0924621	4.97685	6.46284e-07	1.27192e-05	1401.93	1344.36	1412.11	1430.42	1307.85	1396.15	1397.03	1293.86	1844.68	1789.63	2104.45	1687.5	1731.09	2145.42
PCMTD1	672.226	0.733603	0.147431	4.9759	6.49468e-07	1.27653e-05	531.074	547.851	544.772	536.407	494.999	577.829	521.205	540.129	817.783	641.831	998.671	917.02	714.814	1026.78
INO80	1195.95	-0.309887	0.0622888	-4.97501	6.52457e-07	1.28073e-05	1262.8	1203.41	1273.23	1252.41	1412.65	1411.48	1325.28	1351.14	969.657	1010.77	939.167	1147.13	1159.76	1024.45
DPM2	444.764	0.587692	0.118186	4.9726	6.60615e-07	1.29506e-05	394.626	341.742	413.059	402.901	342.341	357.511	368.637	396.913	524.549	453.264	583.136	604.477	472.593	570.949
TNFAIP2	438.346	1.17874	0.237175	4.96993	6.69785e-07	1.31134e-05	206.008	231.374	374.531	401.312	213.607	218.703	299.363	318.349	579.458	754.268	758.672	485.414	621.349	674.441
CUL1	1969.53	-0.31736	0.0638851	-4.96767	6.77616e-07	1.32495e-05	2117.61	2159.49	2128.91	2117.02	2185.06	2198.33	2084.82	2014.85	1781.6	1927.84	1746.43	1624.53	1850.88	1636.1
ITPK1	1044.54	0.484738	0.0976079	4.96617	6.82866e-07	1.33349e-05	914.998	865.658	854.791	812.16	941.58	991.025	906.336	845.384	1067.79	1192.31	1364.62	1219.26	1234.8	1412.84
ADA	718.38	1.53481	0.309355	4.96132	7.00148e-07	1.36547e-05	339.78	369.666	199.81	215.358	704.619	568.144	409.872	450.108	829.466	495.428	839.002	2283.96	904.378	1447.72
BSDC1	510.051	0.392335	0.0791014	4.9599	7.05297e-07	1.37374e-05	481.578	464.078	447.108	471.244	436.898	411.582	456.054	453.381	589.972	569.215	630.739	559.828	551.578	617.462
PLLP	20.2665	1.89808	0.382754	4.95901	7.08549e-07	1.37829e-05	6.68858	14.6271	10.7521	9.53613	5.69619	9.68428	10.721	10.6389	26.87	43.3353	34.7105	27.4762	27.6447	45.3503
KMO	20.9582	2.75479	0.555645	4.95782	7.12875e-07	1.38492e-05	13.3772	7.97841	8.06406	6.35742	4.55695	6.45619	5.77284	7.3654	14.0191	39.8216	58.512	19.4623	34.2268	67.4441
RANBP1	3434.16	-0.52856	0.106617	-4.95755	7.1388e-07	1.38509e-05	4421.15	4154.09	3713.05	3731.01	4146.26	3982.66	3848.84	3789.91	2767.61	3039.33	2283.95	2745.33	2992.21	2462.87
ARSA	211.56	1.18816	0.239714	4.95655	7.17554e-07	1.39043e-05	141.798	105.049	178.305	162.114	116.772	105.72	160.815	183.317	315.431	214.334	312.394	381.233	246.17	338.383
CHCHD10	145.369	0.837571	0.169076	4.95381	7.27725e-07	1.40833e-05	133.772	155.579	118.273	103.308	85.4428	122.668	101.437	114.573	155.379	188.567	190.412	193.479	190.88	181.401
FEN1	813.909	-0.673753	0.136018	-4.9534	7.29285e-07	1.40955e-05	1035.39	972.036	961.416	1001.29	975.188	924.042	996.228	940.316	608.664	682.824	492.889	681.182	667.423	455.829
MARVELD2	877.519	0.615823	0.124378	4.95121	7.37527e-07	1.42365e-05	615.35	675.505	673.797	727.924	702.91	790.076	793.353	786.461	924.095	891.302	1176.19	1113.93	1029.44	1384.93
ECHDC2	311.744	1.15031	0.232378	4.95017	7.41502e-07	1.4295e-05	238.114	226.055	194.434	166.882	267.721	240.493	156.691	171.041	522.213	323.258	464.129	552.959	346.217	494.202
KHDRBS1	2759.97	-0.324815	0.065634	-4.94888	7.46412e-07	1.43713e-05	3031.27	3061.05	3060.76	3041.23	3033.22	3093.32	2983.73	2944.52	2259.42	2625.88	2282.96	2251.91	2584.13	2386.13
KIF22	1116.31	-0.874655	0.176814	-4.94676	7.54606e-07	1.45105e-05	1383.2	1421.49	1421.96	1463	1316.39	1327.55	1438.26	1377.33	789.745	905.356	549.418	741.858	954.402	538.39
AMT	46.0853	-1.67725	0.339091	-4.94632	7.56304e-07	1.45247e-05	84.2762	65.157	64.5125	87.4145	52.9746	59.7197	51.9556	59.7416	30.3748	28.1094	8.92556	22.8969	10.5313	18.6053
ABCA1	490.843	1.62557	0.328697	4.94548	7.59551e-07	1.45685e-05	266.206	222.066	450.692	371.909	132.721	137.194	258.128	320.804	707.966	844.453	1198.01	530.062	559.477	872.122
PPIG	1640.92	-0.346295	0.0700299	-4.94495	7.61636e-07	1.459e-05	1805.92	1837.69	1830.54	1813.45	1834.17	1823.87	1788.76	1686.68	1408.92	1579.98	1350.73	1298.25	1494.13	1419.81
FKBP4	7452.72	-0.629242	0.12728	-4.94377	7.66278e-07	1.46603e-05	9796.1	10140.6	8133.95	8034.19	9358.27	9026.56	8152.08	8054.48	5891.54	6318.75	4657.16	5865.03	6008.12	4901.32
MRPL48	424.223	-0.68298	0.13817	-4.94304	7.69134e-07	1.46777e-05	547.126	553.17	469.508	459.323	534.872	585.899	442.859	439.469	322.44	371.278	276.692	312.542	314.624	309.313
CTSC	463.867	0.963305	0.194873	4.94325	7.6831e-07	1.46777e-05	381.249	304.509	299.266	307.54	396.455	326.037	291.116	275.793	698.62	486.058	839.994	594.174	530.516	762.816
PGPEP1	173.976	1.22632	0.248174	4.94136	7.75788e-07	1.4786e-05	139.123	95.7409	89.6007	89.0038	133.86	135.58	93.1902	99.8421	275.71	159.286	312.394	321.701	218.525	272.102
CD44	12685.9	0.462333	0.0935999	4.93946	7.834e-07	1.49123e-05	10109.1	10330.7	11037	11220.8	10673.5	11195.8	11033.5	10918	15092.8	13758.4	16954.6	14911.6	13236.6	17129.6
LTBP3	768.499	0.892411	0.18072	4.93809	7.88903e-07	1.49981e-05	706.314	559.818	583.301	536.407	553.1	568.144	533.576	574.501	726.659	1157.17	1155.36	768.19	1188.72	1147.71
RAB2B	519.368	0.554964	0.112436	4.93582	7.98136e-07	1.51359e-05	413.354	438.813	448.004	437.072	416.961	414.81	443.684	450.926	613.337	541.106	752.722	605.622	592.387	702.349
PAMR1	15.9265	4.76556	0.965506	4.93582	7.98159e-07	1.51359e-05	0	1.32974	0	0.794677	2.27848	1.61405	0	1.63676	59.5813	7.02735	32.727	77.8493	7.8985	30.2336
CSNK1E	1456.09	0.323876	0.0656258	4.93518	8.00754e-07	1.51661e-05	1347.08	1327.08	1320.71	1403.4	1230.95	1296.08	1328.58	1236.57	1674.12	1636.2	1809.9	1674.91	1471.75	1627.96
USP1	2338.59	-0.684127	0.138683	-4.93304	8.09576e-07	1.5314e-05	2727.6	2827.02	2779.41	2844.94	2706.26	2929.49	2868.28	2756.3	1427.62	2064.87	1550.07	1472.27	2172.09	1614.01
NSL1	378.391	-0.763962	0.154874	-4.93278	8.10654e-07	1.53152e-05	406.666	448.121	395.139	383.034	546.265	538.285	506.361	441.106	205.614	309.203	218.18	279.342	362.014	258.148
SPP1	8000.27	1.86504	0.378113	4.93251	8.11814e-07	1.53179e-05	2623.26	2710	3542.81	3895.51	3660.94	3691.32	4396.43	4042.79	8532.98	10856.1	20908.6	9224	10788	23131
FIG4	983.228	0.836396	0.169921	4.92226	8.55511e-07	1.61223e-05	862.827	918.847	701.574	681.833	738.796	852.217	670.474	620.331	1050.27	1498	1309.08	1022.35	1486.23	1352.37
ANO4	15.6185	2.44821	0.497606	4.91997	8.65569e-07	1.62915e-05	4.01315	3.98921	8.96007	11.9202	4.55695	4.84214	8.24692	4.09189	22.197	25.7669	31.7353	14.883	31.594	41.8618
CD46	7117.22	0.989211	0.201113	4.91869	8.71274e-07	1.63784e-05	4278.02	4321.64	5098.28	5209.11	4895.3	5265.02	5383.59	5215.52	8986.27	7146.81	12936.1	9340.78	7733.95	13830.7
BRCA1	2626.35	-0.740013	0.150498	-4.91711	8.78298e-07	1.64899e-05	3072.74	3154.13	3336.73	3287.58	2865.75	3270.06	3114.04	3224.41	1854.03	2396.32	1589.74	1607.36	2366.92	1629.12
DDX51	312.579	-0.622261	0.126586	-4.91571	8.8463e-07	1.65882e-05	345.131	380.304	321.667	347.274	407.278	343.792	380.183	373.18	261.691	270.553	211.238	279.342	247.486	206.984
DNASE1L1	869.839	0.999625	0.203378	4.91512	8.87301e-07	1.66176e-05	489.604	501.31	695.302	681.038	542.847	540.706	700.163	767.639	1052.6	924.096	1458.83	1188.35	1068.93	1566.33
PALB2	401.428	-0.820924	0.167064	-4.91383	8.93119e-07	1.67059e-05	509.67	558.489	482.052	525.282	498.986	507.618	439.561	425.557	317.767	351.367	207.271	239.272	319.889	237.217
SUV39H2	444.711	-0.467365	0.0951646	-4.91112	9.0557e-07	1.69178e-05	505.657	561.148	528.644	545.943	465.948	528.6	465.126	485.298	358.656	393.531	331.237	337.729	387.026	331.406
SCAMP5	164.238	0.812594	0.165481	4.9105	9.08439e-07	1.69504e-05	107.017	94.4112	112.897	131.122	152.658	151.72	141.022	136.669	165.893	148.745	191.404	277.052	192.197	296.521
MRPS7	695.812	-0.380949	0.077583	-4.91021	9.09792e-07	1.69547e-05	826.709	760.609	774.15	762.095	763.289	753.76	786.756	752.089	592.309	658.228	549.418	574.711	627.931	559.321
RNASEH2B	1267.66	-0.477241	0.0972464	-4.90754	9.22269e-07	1.7166e-05	1360.46	1406.86	1474.83	1443.13	1423.48	1486.54	1498.46	1473.08	919.422	1171.22	919.332	938.772	1167.66	1063.99
CDH18	22.9556	3.87446	0.789776	4.90577	9.30628e-07	1.73003e-05	8.0263	6.64868	0	3.17871	5.69619	4.03512	0.824692	1.63676	92.2927	30.4518	30.7436	87.0081	17.1134	33.722
NPC1	923.671	0.948329	0.193468	4.90174	9.49924e-07	1.76373e-05	846.775	809.809	655.877	630.179	714.872	698.075	584.706	514.76	1369.2	993.198	1477.68	1397.85	876.733	1361.67
AGPAT2	519.198	0.628108	0.128152	4.90128	9.52148e-07	1.76568e-05	500.306	432.164	473.092	445.814	393.607	443.863	392.553	414.918	684.601	510.654	673.384	700.644	525.25	677.929
CNBP	5794.99	-0.269067	0.0549061	-4.90049	9.55971e-07	1.7706e-05	6434.42	6510.38	6031.02	6146.03	6429.29	6331.1	6116.74	5934.88	5167.22	5562.14	5019.14	4976.63	5318.32	5152.5
ACTL6A	722.543	-0.405616	0.0827874	-4.89949	9.60858e-07	1.77529e-05	805.305	827.095	777.734	802.624	866.96	774.742	790.879	775.004	651.89	660.57	564.293	643.402	613.45	561.646
PLD3	1719.19	0.898907	0.183466	4.89958	9.60398e-07	1.77529e-05	1484.87	1320.43	1202.44	1073.61	1347.15	1283.17	1225.49	1239.02	2570.18	1598.72	2599.32	2864.4	1798.22	2461.71
TRAIP	111.126	-0.962943	0.196606	-4.89782	9.69042e-07	1.78823e-05	148.487	134.303	135.297	142.247	148.101	123.475	158.341	121.12	74.7687	91.3555	64.4624	57.2422	96.0984	60.4671
PIAS3	625.147	0.609623	0.124659	4.89034	1.00663e-06	1.85307e-05	501.644	547.851	563.589	518.13	563.353	497.933	491.516	507.394	825.961	603.18	773.548	906.716	677.954	773.281
TCERG1	1974.57	-0.462941	0.0946606	-4.89053	1.00564e-06	1.85307e-05	2080.15	2107.63	2293.78	2317.28	2294.42	2282.26	2247.28	2169.52	1572.48	1844.68	1537.18	1484.86	1879.84	1532.61
C19H17orf53	137.038	-0.791253	0.161899	-4.88731	1.02222e-06	1.87947e-05	156.513	156.909	167.553	167.677	174.873	160.598	204.524	172.678	99.3022	83.1569	65.4541	111.05	114.528	83.7237
FAM46B	232.836	0.99732	0.204098	4.88647	1.02659e-06	1.8852e-05	263.53	265.947	161.281	183.57	141.835	123.475	114.632	152.218	308.421	331.456	415.534	215.231	279.08	303.498
SPN	14.6402	3.39397	0.694615	4.88612	1.02842e-06	1.88628e-05	2.67543	1.32974	3.58403	3.97339	2.84809	1.61405	1.64938	4.09189	42.0574	14.0547	46.6112	43.504	7.8985	29.0707
APP	5058.52	0.765661	0.156763	4.88419	1.03855e-06	1.90164e-05	3293.46	2941.37	4093.86	4218.94	4046	3287.81	4318.91	4420.06	5999.02	5928.74	7777.13	6387.08	6254.29	7852.59
AGRN	2074.18	0.861291	0.176356	4.8838	1.04058e-06	1.90164e-05	1752.41	1597.01	1329.67	1263.54	1785.76	1689.91	1339.3	1450.98	2772.28	2191.36	3328.24	2936.52	2253.7	3347.79
SDHC	1264.6	0.352539	0.072184	4.88389	1.04011e-06	1.90164e-05	1159.8	1228.68	1102.09	1099.04	1105.06	1179.87	1076.22	1135.91	1424.11	1353.94	1536.19	1433.34	1348.01	1522.14
TBC1D20	1101.02	-0.297898	0.0610495	-4.87962	1.06292e-06	1.94011e-05	1280.19	1276.55	1179.15	1215.86	1126.71	1108.04	1195.8	1113.81	1091.16	1036.53	1017.51	919.309	947.82	905.844
MIS18A	334.936	-0.871899	0.178761	-4.87745	1.07464e-06	1.95913e-05	409.341	444.132	397.827	406.08	405.569	389.792	428.015	433.74	211.455	284.607	197.354	194.623	313.307	173.262
BARD1	459.087	-0.804064	0.164921	-4.87544	1.08567e-06	1.97687e-05	552.477	626.305	615.557	603.955	494.999	557.653	540.998	533.582	338.796	409.928	238.015	281.631	375.179	258.148
EBNA1BP2	1064.46	-0.558038	0.114466	-4.87513	1.08735e-06	1.97754e-05	1367.15	1340.37	1120.01	1118.91	1344.87	1276.71	1181.78	1144.09	897.225	880.761	708.094	841.46	903.062	777.933
PDHB	1239.72	-0.395438	0.0811625	-4.87218	1.10374e-06	2.00492e-05	1442.06	1413.51	1391.5	1402.61	1392.72	1313.03	1349.2	1377.33	960.311	1093.92	1119.66	899.847	1099.21	1101.2
OAS1Z	28.3481	2.09646	0.430506	4.86976	1.11736e-06	2.02723e-05	0	1.32974	0	0	28.4809	25.8247	16.4938	18.8227	9.34609	2.34245	5.95037	136.236	47.391	104.655
LAMP1	2469.73	0.516881	0.10627	4.86384	1.15131e-06	2.08381e-05	2192.52	1987.95	2038.42	2066.16	2138.35	2009.49	2040.29	2138.42	3066.69	2582.55	3381.79	3170.07	2506.46	3257.08
DNMT1	4074.27	-0.593896	0.122103	-4.86388	1.15105e-06	2.08381e-05	4554.93	4725.88	4833.96	4961.96	4766.57	4654.91	4774.14	4826.79	2960.37	3815.85	2709.4	2899.89	3759.69	2795.44
MMP13	8.98907	4.97516	1.02307	4.86298	1.15634e-06	2.08791e-05	1.33772	0	0.896007	0.794677	0	0	2.47408	0	16.3557	15.2259	35.7022	21.752	9.21491	22.0938
PADI4	15.28	4.86819	1.00104	4.86313	1.15545e-06	2.08791e-05	0	0	1.79201	0	0.569619	3.22809	2.47408	0	7.00957	9.36979	55.5368	24.0417	25.0119	84.8865
ANKRD22	122.903	1.40223	0.288414	4.86187	1.16281e-06	2.0971e-05	97.6533	75.7949	61.8245	63.5742	92.8479	99.2639	52.7803	56.4681	134.35	156.944	230.081	152.264	181.665	265.125
TSN	1916.21	-0.342327	0.0704516	-4.85904	1.17957e-06	2.12477e-05	2141.68	2176.78	1938.06	2066.16	2049.49	2247.56	2096.37	1979.66	1771.08	1739.27	1666.1	1676.05	1749.52	1529.12
MGAT2	1524.28	0.444412	0.0915213	4.85583	1.19882e-06	2.15432e-05	1278.86	1301.81	1157.64	1139.57	1473.03	1643.1	1350.02	1384.7	1655.43	1425.38	1559.99	1974.85	1864.05	2131.47
RPL3	12839.1	-0.292234	0.0601802	-4.85598	1.19793e-06	2.15432e-05	14997.1	14681.6	13702.6	13381.6	14304.3	13842.9	13863.1	13848.6	11371.9	11165.3	10375.5	12056.3	11414.6	10742.2
DDAH1	4718.75	0.497433	0.102473	4.85429	1.20816e-06	2.16851e-05	3783.06	4321.64	3920.03	3959.88	3801.64	4128.73	3834.82	3913.48	6789.94	5139.33	5873.02	5923.42	4812.82	5860.66
CCT3	11354.6	-0.2888	0.059574	-4.84776	1.24865e-06	2.23853e-05	12375.2	13128.5	12013.7	12176	12444.5	12488.7	12246.7	12133.3	9969.94	10549.2	9159.6	9778.11	10695.9	9804.98
MYOM3	19.2253	2.03708	0.420693	4.84221	1.28402e-06	2.29921e-05	5.35087	6.64868	9.85608	7.15209	8.54428	8.07023	9.07161	8.18378	29.2065	32.7943	40.6609	35.4901	15.797	52.3273
SPG7	573.039	0.447673	0.0925308	4.8381	1.31089e-06	2.34177e-05	501.644	490.672	450.692	503.825	533.163	502.776	500.588	479.57	731.332	627.776	638.673	743.003	609.501	709.326
SFR1	157.746	-0.643689	0.133043	-4.83819	1.31025e-06	2.34177e-05	188.618	178.185	174.721	189.928	177.151	175.931	192.978	183.317	120.331	152.259	123.966	106.47	132.958	111.632
NFATC2IP	161.631	-0.694038	0.143534	-4.83535	1.32913e-06	2.37153e-05	173.903	208.768	207.874	198.669	193.101	166.247	187.205	177.588	148.369	151.088	113.057	111.05	122.427	103.492
RCN1	8890.09	0.4352	0.090015	4.83475	1.33313e-06	2.37585e-05	7107.29	7453.17	7016.63	7365.86	8233.84	8274.41	8040.74	7817.97	9718.77	9342.86	11268	10097.5	10107.4	12616.7
MB	57.5969	1.17521	0.243087	4.83452	1.3347e-06	2.37585e-05	42.8069	43.8813	38.5283	30.9924	35.886	46.0003	32.9877	28.6432	66.5909	108.924	87.2721	69.8354	96.0984	77.9096
SLC12A4	1913.53	0.385984	0.0798595	4.83328	1.34301e-06	2.38783e-05	1799.23	1672.81	1680.91	1725.24	1655.88	1709.28	1620.52	1765.24	2036.28	2155.05	2355.36	2088.19	2050.98	2474.5
DNAI2	14.6012	2.05741	0.425877	4.83099	1.35854e-06	2.41261e-05	12.0395	15.9568	9.85608	7.15209	3.98733	8.87726	6.59753	4.09189	18.6922	22.2533	22.8098	27.4762	23.6955	20.9309
CEP95	318.934	-0.565525	0.117103	-4.82931	1.37006e-06	2.43021e-05	341.118	340.412	377.219	383.034	370.822	342.178	372.761	396.913	233.652	299.833	253.882	233.548	288.295	231.403
HDGF	14217.3	-0.45233	0.0936845	-4.82823	1.37755e-06	2.44024e-05	16293.4	16756	16842.2	16696.2	15623.5	15589.3	16203.5	15789	10371.8	13357.8	10870.3	10471.9	13048.3	11128.3
PUS7	582.916	-0.549937	0.113905	-4.82802	1.37895e-06	2.44024e-05	624.714	743.322	639.749	687.396	727.403	698.882	656.455	594.142	466.136	525.88	422.476	439.62	516.035	418.618
CHPF2	336.831	0.661009	0.136957	4.8264	1.3902e-06	2.45726e-05	288.947	325.785	310.914	273.369	256.898	248.563	230.089	259.426	452.117	382.99	507.765	398.405	319.889	460.48
IFIT2	214.616	1.27029	0.263219	4.826	1.39303e-06	2.45938e-05	5.35087	5.31894	1.79201	6.35742	250.063	263.09	239.985	286.432	26.87	8.19857	31.7353	691.485	414.671	773.281
TMEM37	67.1318	1.38192	0.286383	4.82541	1.39716e-06	2.46381e-05	53.5087	35.9028	39.4243	42.1179	34.1771	30.6669	32.163	40.1005	107.48	77.3008	179.503	90.4426	72.4029	104.655
HNRNPR	4288.53	-0.453777	0.0940457	-4.82507	1.39953e-06	2.46509e-05	4743.54	4783.06	4809.77	4944.48	4918.66	5035.83	4949.8	4677.85	3269.96	3958.74	3221.13	3234.18	4119.07	3373.37
GLS2	286.682	-0.636675	0.132034	-4.82204	1.42096e-06	2.49994e-05	349.144	370.996	313.603	321.844	368.543	338.143	302.662	307.71	257.018	237.759	210.246	249.576	201.412	184.89
B4GALT1	1041.59	0.537005	0.111444	4.81861	1.44561e-06	2.54033e-05	811.994	800.501	831.495	853.483	807.72	912.743	891.492	956.684	1229.01	1109.15	1498.5	1257.04	1168.98	1453.54
BTC	31.9122	2.37385	0.492722	4.81783	1.45128e-06	2.54734e-05	8.0263	5.31894	5.37604	7.15209	12.5316	12.9124	11.5457	12.2757	40.8892	30.4518	109.09	54.9525	31.594	104.655
PCED1A	739.76	-0.556783	0.115642	-4.81472	1.4741e-06	2.58438e-05	861.49	840.393	844.039	840.768	931.897	851.41	861.803	844.566	628.525	602.009	470.079	689.196	585.805	504.668
HOMER1	213.377	1.22146	0.253755	4.81352	1.48294e-06	2.59385e-05	121.732	144.941	166.657	180.392	101.962	92.0007	133.6	157.129	252.344	390.018	399.667	185.465	326.471	334.895
NCAPG	3204.26	-0.630497	0.130983	-4.81356	1.48262e-06	2.59385e-05	3783.06	3808.36	3809.82	3840.67	3654.11	3729.25	3755.65	3702.34	2344.7	3085	2154.03	2121.39	2940.87	2130.3
RAD51AP1	608.352	-0.749964	0.155818	-4.81308	1.48623e-06	2.59661e-05	745.108	727.365	805.51	842.358	674.998	660.145	809.847	715.262	389.031	528.222	342.146	373.219	519.984	383.734
IFI16	258.063	0.957286	0.198918	4.81247	1.49075e-06	2.60148e-05	33.4429	38.5623	28.6722	30.9924	371.961	330.073	264.726	274.157	155.379	132.348	144.792	777.349	419.937	610.485
B4GALT4	279.554	0.756548	0.157233	4.81165	1.49689e-06	2.60782e-05	185.943	199.46	167.553	177.213	224.43	251.791	264.726	275.793	306.085	213.163	361.981	441.91	384.394	459.318
PTTG1	1342.22	-0.74559	0.154959	-4.81152	1.49783e-06	2.60782e-05	1729.67	1708.71	1585.04	1522.6	1674.68	1691.52	1585.88	1572.1	925.263	1143.11	731.896	904.426	1224.27	791.887
LOC782251	136.697	0.956455	0.198797	4.81121	1.5002e-06	2.60894e-05	96.3156	115.687	126.337	122.38	93.9871	96.0358	90.7161	79.3827	205.614	142.889	221.155	199.203	126.376	197.681
DDX46	2104.39	-0.453522	0.0942897	-4.80988	1.51021e-06	2.62331e-05	1995.87	2255.23	2298.26	2340.32	2598.6	2421.88	2552.42	2310.28	1764.07	1903.24	1604.62	1617.66	2023.33	1775.64
UST	620.841	0.407061	0.084737	4.80382	1.55671e-06	2.70097e-05	523.047	559.818	532.228	499.057	512.657	582.671	499.763	536.856	802.596	713.276	812.226	698.354	672.689	746.536
STPG1	23.8426	3.25484	0.677825	4.80189	1.57174e-06	2.72393e-05	1.33772	5.31894	13.4401	8.74145	3.98733	4.03512	9.07161	5.72865	22.197	25.7669	72.3962	28.6211	25.0119	108.143
PAF1	615.862	-0.390999	0.081442	-4.80095	1.57916e-06	2.73364e-05	624.714	644.922	654.981	654.814	743.922	710.988	747.171	702.987	496.511	490.743	489.914	631.954	522.617	505.831
PRR13	815.52	0.440296	0.0917423	4.79927	1.59242e-06	2.75345e-05	785.24	745.981	716.806	748.586	682.973	729.549	677.072	693.985	926.431	851.48	1029.41	934.192	838.557	1057.01
GIPC1	661.568	0.380377	0.0792704	4.79847	1.5988e-06	2.76131e-05	615.35	601.04	594.949	597.597	546.265	540.706	589.655	609.692	780.399	747.241	812.226	804.825	676.638	745.373
HID1	199.757	1.28599	0.268116	4.79638	1.61559e-06	2.78713e-05	145.811	130.314	124.545	114.434	108.228	129.124	116.282	136.669	373.844	181.54	341.155	374.364	173.767	346.523
ZC3H4	1429.67	-0.420217	0.0876166	-4.79609	1.61794e-06	2.78799e-05	1547.74	1595.68	1671.95	1599.69	1623.41	1586.61	1650.21	1674.4	1113.35	1235.64	1051.23	1222.69	1382.24	1060.5
SLC34A2	617.899	1.7755	0.370249	4.79543	1.62328e-06	2.794e-05	206.008	131.644	178.305	133.506	361.708	536.671	315.857	473.022	790.913	350.196	841.977	2415.62	647.677	1267.48
PNPLA7	64.6343	-1.05203	0.219448	-4.79399	1.635e-06	2.81097e-05	69.5613	58.5083	89.6007	77.8784	78.0378	76.6672	87.4173	88.3848	45.5622	55.0475	58.512	30.9108	43.4417	45.3503
AURKB	739.566	-0.764644	0.159523	-4.79332	1.64042e-06	2.81189e-05	996.599	969.377	921.095	928.978	843.606	755.374	895.615	876.483	546.746	678.139	452.228	512.89	608.184	368.617
PDCD4	599.962	0.537141	0.112062	4.79324	1.64112e-06	2.81189e-05	460.175	469.397	529.54	551.506	446.012	486.635	507.185	539.311	700.957	707.419	850.903	680.037	672.689	797.701
CITED2	208.379	1.15866	0.241719	4.7934	1.63977e-06	2.81189e-05	196.644	182.174	161.281	154.962	78.6074	79.8953	82.4692	69.5621	544.41	285.779	562.31	170.582	127.692	220.938
GNL3	1697.57	-0.565412	0.117971	-4.7928	1.64467e-06	2.81477e-05	2014.6	2051.78	1740.05	1772.92	2221.51	2090.19	1827.52	1830.71	1477.85	1482.77	1213.88	1373.81	1502.03	1166.32
NUP85	745.63	-0.498502	0.104026	-4.79209	1.65051e-06	2.82158e-05	912.323	921.506	845.831	786.73	875.504	877.234	814.795	792.19	657.731	630.119	539.5	634.243	637.146	513.97
PARP2	439.932	-0.494549	0.103249	-4.78985	1.66909e-06	2.8501e-05	501.644	563.808	516.996	487.137	526.328	472.916	493.99	477.933	343.469	409.928	314.378	368.64	352.8	329.081
MCM9	355.926	-0.461702	0.0964837	-4.78528	1.70745e-06	2.91231e-05	383.925	378.975	379.907	404.491	456.834	406.74	392.553	401.824	321.272	282.265	268.758	296.514	305.409	303.498
BTG3	550.689	0.637241	0.133187	4.78456	1.71364e-06	2.91627e-05	449.473	505.299	388.867	423.563	500.695	467.266	406.573	377.272	781.567	657.057	707.102	765.9	587.122	691.883
EDA2R	25.3197	3.42374	0.715556	4.78472	1.71228e-06	2.91627e-05	0	3.98921	8.06406	7.94677	1.70886	2.42107	4.12346	13.094	70.0957	26.9382	47.603	80.139	19.7462	68.6069
HILPDA	78.4644	1.09088	0.228053	4.78348	1.7229e-06	2.92874e-05	57.5218	50.5299	44.8004	38.9392	51.8353	63.7548	46.1827	50.7394	134.35	89.013	131.9	96.1668	97.4148	145.354
LOC104975607	157.013	0.661517	0.138371	4.78074	1.74649e-06	2.9655e-05	153.837	140.952	131.713	132.711	120.759	109.755	126.178	121.12	204.446	185.053	206.28	185.465	156.654	223.263
ETS2	1477.82	0.990834	0.207273	4.78034	1.74998e-06	2.96809e-05	900.283	882.944	944.392	910.7	1281.07	1300.92	928.603	998.421	1354.02	1797.83	2668.74	2018.36	1890.37	2812.88
ABCB1	698.735	0.614758	0.128626	4.7794	1.75817e-06	2.97863e-05	462.85	601.04	495.492	504.62	609.492	623.022	572.336	590.051	943.955	705.077	925.283	1012.04	775.369	961.66
SDC1	3962.04	0.348433	0.0729186	4.77838	1.76716e-06	2.99051e-05	3318.88	3284.45	3212.19	3190.63	3986.19	3941.5	3809.25	3647.51	4220.93	3876.75	4292.2	5182.71	4319.16	5186.22
IGFBP7	661.369	0.837057	0.175217	4.77725	1.77708e-06	3.00392e-05	426.732	428.175	539.396	523.692	413.543	455.968	512.134	579.412	727.827	967.431	1059.17	684.616	909.644	1031.43
LOC100847618	14.9322	2.18534	0.457511	4.77658	1.78304e-06	3.01062e-05	5.35087	2.65947	5.37604	4.76806	6.26581	3.22809	6.59753	9.00216	17.5239	21.082	41.6526	25.1866	28.9612	31.3964
RNF44	435.376	0.504664	0.105728	4.77323	1.81297e-06	3.05775e-05	398.64	385.623	426.499	419.59	350.316	315.546	305.961	331.443	620.347	537.592	615.863	533.497	435.734	418.618
FHL1	1017.56	1.21575	0.254744	4.77242	1.82026e-06	3.06661e-05	842.762	861.668	521.476	549.917	742.783	695.654	466.775	490.208	2116.89	1281.32	1502.47	1824.88	1047.87	1301.21
POLE2	216.338	-0.683714	0.143298	-4.77127	1.83067e-06	3.08072e-05	255.504	307.169	263.426	290.057	256.898	237.265	256.479	251.242	150.706	172.17	119.007	168.292	173.767	126.748
UNC93A	52.4951	1.63738	0.343204	4.77085	1.83446e-06	3.08364e-05	26.7543	34.5731	34.0483	24.635	28.4809	27.4388	21.442	31.9167	92.2927	53.8763	105.123	100.746	40.8089	112.794
NEURL3	32.9759	1.3053	0.273769	4.76791	1.86151e-06	3.12564e-05	5.35087	10.6379	19.7122	13.5095	31.329	25.8247	29.6889	29.4616	26.87	28.1094	25.7849	88.1529	53.9731	73.2582
C18H16orf74	106.497	1.00692	0.211213	4.76731	1.86703e-06	3.13142e-05	92.3025	73.1354	89.6007	84.2358	72.9112	70.211	70.0988	68.7438	141.36	124.15	179.503	112.195	117.161	195.355
KAT8	342.767	-0.561639	0.117844	-4.76596	1.87958e-06	3.14898e-05	402.653	402.91	394.243	395.749	453.417	418.845	377.709	378.909	227.811	255.327	259.833	273.618	325.155	232.566
SPAG5	1319.18	-0.68829	0.14443	-4.76557	1.88317e-06	3.14963e-05	1642.72	1656.85	1647.76	1657.7	1520.88	1460.71	1510.01	1521.36	1066.62	1161.85	821.151	918.164	1167.66	715.14
LOC107131864	88.5495	1.42388	0.298792	4.76547	1.88414e-06	3.14963e-05	16.0526	25.265	26.8802	29.4031	69.4935	100.071	81.6445	94.1135	24.5335	40.9928	37.6857	135.092	211.943	346.523
FLVCR2	54.676	2.46245	0.516953	4.76339	1.90371e-06	3.17882e-05	8.0263	3.98921	32.2563	27.019	14.2405	6.45619	26.3901	22.9146	81.7783	111.266	142.809	76.7045	89.5163	122.097
SELENOV	77.874	1.51327	0.317716	4.76296	1.9077e-06	3.18196e-05	48.1578	51.8597	30.4642	42.1179	65.5062	57.2987	39.5852	23.733	88.7879	101.897	139.834	106.47	122.427	172.099
NUP155	1063.58	-0.510635	0.107249	-4.76123	1.92418e-06	3.20591e-05	1154.45	1325.75	1216.78	1215.86	1105.06	1221.83	1185.08	1194.83	989.517	1028.33	773.548	776.204	930.706	772.119
MRC2	4695.95	0.536699	0.112753	4.75994	1.93647e-06	3.22282e-05	3948.94	3493.21	4564.26	4369.14	3479.8	3386.27	4124.28	4372.59	5856.49	5450.88	5985.08	5780.31	5723.78	5208.31
OSBPL10	609.738	0.407886	0.0857051	4.75918	1.94379e-06	3.23144e-05	565.854	531.894	578.821	539.586	534.303	468.074	491.516	558.134	718.481	724.988	780.49	630.809	692.435	720.954
PPT2	309.023	0.70422	0.148011	4.7579	1.95622e-06	3.24853e-05	291.622	252.65	269.698	298.799	224.999	203.37	226.79	257.789	349.31	357.223	479.997	361.77	318.573	433.735
NRF1	453.91	-0.572517	0.120375	-4.75611	1.9736e-06	3.2738e-05	555.152	518.597	459.652	515.745	542.277	531.021	569.862	519.67	339.964	421.641	290.576	393.826	360.698	336.058
SNRPE	1166.75	-0.468018	0.0984151	-4.75555	1.97908e-06	3.27927e-05	1348.42	1432.12	1266.06	1199.17	1375.06	1336.43	1351.67	1352.78	891.383	1015.45	827.102	1001.74	1084.73	852.354
CLSPN	802.297	-0.91547	0.192524	-4.75511	1.98342e-06	3.28286e-05	913.661	1039.85	1010.7	1153.87	930.757	910.322	1021.79	1039.34	482.492	723.817	452.228	432.751	704.283	416.293
GAS2L1	916.713	0.57597	0.121156	4.75396	1.99468e-06	3.29788e-05	806.643	753.96	877.191	764.479	670.441	704.531	830.465	757.818	1101.67	1022.48	1235.69	1095.62	928.074	1284.93
TOP3A	669.332	-0.368891	0.0776402	-4.75128	2.0213e-06	3.33824e-05	813.332	704.76	797.446	750.97	751.897	727.128	715.008	730.812	574.785	568.044	535.533	588.449	595.02	517.459
BCKDHA	1376.4	0.524662	0.110494	4.74831	2.05126e-06	3.38401e-05	1316.31	1176.82	1264.27	1176.92	1090.25	1129.83	1176.01	1154.73	1786.27	1423.04	1669.08	1883.27	1361.17	1661.68
LOC615277	298.017	0.721051	0.151935	4.74578	2.07708e-06	3.42287e-05	242.127	249.99	272.386	283.7	209.05	209.826	246.583	256.971	313.094	400.559	347.105	310.253	471.277	359.314
RUSC1	560.439	-0.433482	0.091386	-4.74342	2.10136e-06	3.45911e-05	695.613	660.878	623.621	590.445	627.15	645.619	594.603	632.606	485.997	435.695	466.112	515.18	452.847	419.781
CHST3	1590.55	0.459093	0.0967916	4.74311	2.10467e-06	3.46078e-05	1264.14	1230.01	1464.08	1409.76	1409.24	1411.48	1343.42	1307.77	1758.23	1831.79	2196.68	1887.85	1731.09	2022.16
ATF3	1275.95	1.12082	0.236411	4.74095	2.12714e-06	3.49392e-05	498.968	389.612	586.885	520.514	1103.35	1053.97	1129	1115.45	1226.67	1047.07	2013.21	2027.52	1771.9	3379.18
ARMCX3	635.229	0.801629	0.169175	4.73846	2.15344e-06	3.53328e-05	445.46	457.429	504.452	534.023	451.708	489.056	454.405	469.749	848.158	687.509	1114.7	739.569	671.372	1025.62
SKP2	230.22	-0.65432	0.13812	-4.73734	2.16538e-06	3.54901e-05	259.517	285.893	310.018	302.772	281.392	248.563	249.057	250.424	204.446	194.423	144.792	176.306	172.451	143.028
CTSL	18.6664	4.1253	0.870983	4.73637	2.17578e-06	3.56219e-05	1.33772	3.98921	3.58403	4.76806	1.13924	3.22809	4.12346	2.45513	5.84131	25.7669	64.4624	5.72422	50.0238	84.8865
PAK3	35.5348	1.42772	0.301597	4.73386	2.20294e-06	3.60276e-05	24.0789	13.2974	19.7122	27.019	16.5189	27.4388	23.9161	19.6411	65.4226	35.1367	50.5782	56.0973	50.0238	68.6069
CENPO	743.407	-0.620002	0.131063	-4.73058	2.23884e-06	3.65749e-05	781.227	948.101	821.639	889.244	870.947	865.936	964.065	903.489	529.222	628.947	444.294	558.684	693.751	508.156
RECQL4	416.769	-0.789448	0.167029	-4.72642	2.2851e-06	3.72904e-05	543.113	565.137	429.187	483.958	546.834	512.46	471.724	472.204	351.647	357.223	231.073	321.701	315.94	232.566
CD53	17.0439	4.34738	0.919884	4.72601	2.28976e-06	3.7326e-05	1.33772	1.32974	4.48004	3.17871	0.569619	2.42107	1.64938	3.27351	53.74	4.6849	44.6278	46.9386	5.26567	65.1184
CDH26	18.6673	4.20327	0.889766	4.72402	2.31233e-06	3.76533e-05	1.33772	1.32974	1.79201	0	2.27848	3.22809	2.47408	0.818378	15.1874	14.0547	97.1894	17.1727	18.4298	86.0494
P4HA1	881.738	0.877008	0.185744	4.72159	2.34008e-06	3.8037e-05	620.701	550.51	700.678	705.673	532.024	615.759	647.383	687.438	1097	1168.88	1600.65	862.067	1063.66	1491.91
KIF12	140.869	-1.73822	0.368149	-4.72152	2.34093e-06	3.8037e-05	300.986	275.255	163.073	138.274	223.86	238.879	132.775	148.126	47.8987	92.5267	42.6443	51.518	80.3014	36.0477
SNRPA	935.379	-0.581635	0.12322	-4.7203	2.355e-06	3.82245e-05	1137.06	1174.16	1068.94	1041.82	1152.34	1133.87	1052.31	1087.62	692.779	762.467	572.227	813.984	816.178	589.554
ECPAS	3836.72	-0.310002	0.0657455	-4.71518	2.41496e-06	3.91556e-05	3990.41	4104.89	4241.7	3992.46	4273.85	4370.84	4266.13	4334.95	3136.78	3523.04	3042.62	3221.59	3733.36	3481.51
CDC45	354.408	-0.623543	0.13228	-4.71382	2.43118e-06	3.93762e-05	449.473	422.856	411.267	436.278	430.632	368.003	408.222	412.463	300.243	313.888	218.18	224.389	294.877	270.939
DNAH10	34.4308	1.52739	0.324079	4.71301	2.44078e-06	3.94894e-05	16.0526	10.6379	14.3361	17.4829	22.2151	17.7545	18.9679	22.9146	77.1053	42.1641	45.6195	59.5319	38.1761	79.0724
KCNJ16	294.207	0.92378	0.196027	4.71251	2.44687e-06	3.95072e-05	263.53	232.704	306.434	298.799	127.025	142.036	228.44	210.323	377.348	470.832	457.187	313.687	367.28	323.267
NADK2	294.14	-0.542266	0.115075	-4.71227	2.44973e-06	3.95072e-05	337.105	367.007	317.187	342.506	361.138	351.055	317.506	310.165	234.821	277.58	210.246	230.114	238.271	223.263
NTAN1	1682.35	0.541129	0.114832	4.71236	2.44869e-06	3.95072e-05	1527.67	1509.25	1327.88	1292.94	1436.58	1449.41	1360.74	1388.79	2186.99	1700.62	2223.46	2224.43	1750.83	2173.33
CRELD1	220.013	0.797785	0.169373	4.71022	2.47448e-06	3.98637e-05	171.228	206.109	208.77	184.365	143.544	146.878	201.225	165.312	245.335	258.841	295.535	301.094	215.892	336.058
HNRNPC	4109.95	-0.309112	0.0656354	-4.70953	2.48287e-06	3.99162e-05	4615.12	4510.46	4493.48	4675.09	4712.46	4593.58	4393.96	4289.94	3352.91	3718.64	3287.58	3500.93	3933.45	3461.74
KDM1A	2084.14	-0.262991	0.0558424	-4.70952	2.48303e-06	3.99162e-05	2311.57	2401.5	2289.3	2210.79	2161.13	2223.35	2236.56	2297.19	1877.4	1845.85	1749.41	1906.16	1924.6	1743.08
PODN	24.4133	2.05839	0.437337	4.70664	2.51839e-06	4.04416e-05	12.0395	6.64868	9.85608	10.3308	6.26581	12.1053	9.8963	14.7308	61.9179	30.4518	35.7022	64.1112	22.3791	45.3503
ELAVL1	2016.73	-0.340945	0.0724441	-4.70632	2.52233e-06	4.04618e-05	2319.6	2307.09	2204.18	2236.22	2170.25	2248.37	2128.53	1989.48	1940.48	1979.37	1654.2	1629.11	1717.92	1709.36
KLF13	55.9041	1.37089	0.291335	4.70556	2.53176e-06	4.057e-05	41.4692	23.9352	31.3603	41.3232	30.1898	39.5441	26.3901	34.3719	109.817	55.0475	97.1894	99.6014	60.5552	91.8635
POC1B	239.228	-0.643129	0.136686	-4.70515	2.53677e-06	4.06072e-05	315.701	321.796	294.786	269.396	273.417	280.844	264.726	258.607	162.388	195.594	192.395	133.947	205.361	180.239
ZNF280A	9.31966	5.02893	1.06938	4.70265	2.56807e-06	4.10647e-05	0	1.32974	1.79201	1.58935	1.13924	0.807023	0	0	36.2161	22.2533	12.8925	30.9108	5.26567	16.2796
ANAPC1	2004.06	-0.462167	0.0982858	-4.70227	2.57279e-06	4.10966e-05	2250.04	2303.1	2300.95	2264.04	2307.53	2187.03	2266.25	2216.99	1570.14	1910.27	1588.75	1476.85	1920.65	1494.24
C17H4orf46	250.233	-0.667868	0.142077	-4.70075	2.59206e-06	4.13606e-05	319.714	303.18	310.018	356.015	249.493	263.09	310.909	285.614	203.277	222.533	155.701	160.278	194.83	168.61
NPTN	3137.82	0.369265	0.0785785	4.69931	2.61045e-06	4.16101e-05	2654.03	2652.82	2593.04	2637.53	3022.97	2923.85	2714.88	2727.65	3674.18	3369.61	3924.27	3539.86	3401.62	4093.16
PHC1	556.218	-0.513566	0.109301	-4.69865	2.61882e-06	4.16995e-05	708.99	723.376	625.413	590.445	640.252	635.934	602.85	634.243	474.314	461.462	367.931	439.62	475.226	406.99
KIF2C	1285.72	-0.697778	0.148832	-4.68836	2.75403e-06	4.38063e-05	1098.27	1179.48	1158.54	1188.84	1999.93	1952.19	1821.74	1809.43	799.091	905.356	579.169	1235.29	1361.17	911.658
ZNF287	404.871	-0.482236	0.10291	-4.68598	2.78627e-06	4.42724e-05	441.447	420.196	503.556	530.844	459.682	438.214	460.178	421.465	338.796	357.223	340.163	334.294	329.104	293.033
DRG1	1330.64	-0.298086	0.0636455	-4.68355	2.81954e-06	4.47538e-05	1514.3	1506.59	1507.08	1523.4	1388.16	1381.62	1420.12	1428.07	1132.05	1294.2	1104.79	1096.76	1199.26	1132.6
LMO2	65.4785	1.62084	0.346275	4.6808	2.85751e-06	4.52652e-05	29.4298	31.9136	35.8403	24.635	40.4429	40.3512	25.5654	35.1903	143.696	62.0749	120.991	155.699	59.2387	111.632
ZGRF1	375.901	-0.705433	0.150708	-4.68079	2.85775e-06	4.52652e-05	414.692	484.024	494.596	466.476	413.543	461.617	431.314	422.283	292.065	333.799	250.907	227.824	346.217	223.263
LOC101903397	16.8494	2.01571	0.430819	4.67879	2.8857e-06	4.56601e-05	4.01315	6.64868	8.06406	7.15209	9.1139	4.03512	9.8963	4.09189	22.197	38.6504	38.6774	32.0556	21.0627	30.2336
CENPH	489.154	-0.892708	0.19088	-4.67679	2.91397e-06	4.60591e-05	612.674	622.316	600.325	588.061	569.619	663.373	630.064	573.683	293.234	445.065	263.8	269.038	443.632	273.265
NEB	100.979	2.20524	0.472068	4.67144	2.99092e-06	4.72258e-05	41.4692	31.9136	49.2804	34.1711	33.0379	35.509	48.6568	41.7373	61.9179	195.594	291.568	73.27	159.286	316.29
HK1	4281.34	-0.252553	0.0540712	-4.67076	3.00093e-06	4.73345e-05	4688.7	4804.33	4558.88	4450.19	4702.2	4688.81	4504.47	4537.09	3670.68	4019.64	3704.11	3704.71	4086.16	3818.73
STARD7	2253.9	-0.346339	0.0741634	-4.66995	3.01278e-06	4.74717e-05	2465.41	2559.74	2538.39	2625.61	2248.86	2321.81	2545.82	2444.5	1880.9	2244.07	2038.99	1791.68	2002.27	1846.57
SLC48A1	148.417	0.911667	0.195284	4.66841	3.03543e-06	4.77788e-05	129.759	139.622	103.041	100.129	108.797	104.106	108.035	85.1113	226.643	156.944	242.973	219.81	154.021	198.844
TJP3	83.9367	0.807848	0.17311	4.66666	3.06135e-06	4.81365e-05	78.9253	82.4436	85.1207	81.8518	50.6961	62.1408	51.1309	42.5557	122.667	118.294	127.933	95.022	96.0984	80.2352
PFAS	2305.07	-0.503732	0.107951	-4.6663	3.06672e-06	4.81708e-05	2588.48	2813.72	2662.93	2668.53	2594.04	2696.26	2576.34	2586.07	1913.61	2049.64	1589.74	1824.88	2149.71	1557.03
CLP1	187.03	-0.583272	0.125013	-4.6657	3.07569e-06	4.82615e-05	192.631	196.801	209.666	221.715	214.746	240.493	205.348	214.415	148.369	170.999	165.619	132.802	140.857	163.959
SSRP1	7458.04	-0.49452	0.106017	-4.66455	3.09295e-06	4.8482e-05	9050.99	9459.74	8154.56	8052.46	9063.78	8928.1	7917.86	7918.63	6081.97	6584.62	5188.72	6112.32	6574.18	5324.59
EPB41L5	257.21	0.926714	0.198705	4.66378	3.10457e-06	4.85937e-05	196.644	191.482	146.945	161.319	220.443	223.545	162.464	171.041	311.926	272.895	432.394	309.108	344.901	455.829
EIF3D	4329.65	-0.296982	0.0636803	-4.66365	3.10652e-06	4.85937e-05	4742.21	5038.37	4513.19	4493.9	4927.2	4764.67	4757.65	4546.91	3951.06	3829.9	3451.22	3942.84	3905.81	3750.12
XPOT	5244.32	-0.476989	0.102384	-4.65884	3.18e-06	4.96916e-05	5951.5	6455.86	5871.54	5913.99	5658.59	6176.15	5576.57	5608.34	4703.42	5028.07	4069.06	3729.9	4857.58	3819.89
CNGA3	12.5611	2.64662	0.568137	4.65843	3.18635e-06	4.97129e-05	1.33772	1.32974	1.79201	5.56274	2.84809	5.64916	4.94815	6.54702	9.34609	17.5684	26.7767	19.4623	25.0119	47.676
DSN1	1006.13	-0.529123	0.113587	-4.65832	3.18795e-06	4.97129e-05	1075.52	1166.18	1236.49	1180.1	1089.68	1075.76	1134.78	1169.46	907.739	1001.4	723.962	712.093	885.948	726.768
LOC788801	314.737	0.908808	0.195135	4.65734	3.20327e-06	4.99002e-05	240.789	349.72	200.706	211.384	218.734	268.739	179.783	198.866	503.521	385.333	429.418	444.199	364.647	410.479
LOC107131398	1685.05	-0.359668	0.0772374	-4.65666	3.21375e-06	5.0012e-05	1789.87	2110.29	1817.1	1831.73	1763.54	1993.35	1841.54	1829.07	1450.98	1482.77	1338.83	1400.14	1520.46	1420.98
ARHGAP1	1118.18	0.507337	0.108973	4.65562	3.23003e-06	5.02135e-05	979.209	920.177	1068.94	1024.34	864.112	860.287	931.902	979.598	1392.57	1158.34	1601.64	1311.99	1193.99	1367.49
BOLA-DQB	20.3374	3.108	0.667665	4.65503	3.23933e-06	5.03063e-05	0	0	1.79201	2.38403	0	11.2983	8.24692	3.27351	46.7305	31.6231	35.7022	34.3453	50.0238	59.3043
ACIN1	2925	-0.377829	0.0812153	-4.65219	3.2842e-06	5.09507e-05	3173.06	3104.93	3186.2	3407.58	3368.16	3148.2	3302.07	3200.68	2504.75	2709.04	2326.59	2470.57	2803.97	2244.26
LOC112446759	177.07	-0.600874	0.12917	-4.65179	3.29066e-06	5.09985e-05	172.565	182.174	203.394	170.061	236.961	231.616	221.842	220.144	148.369	131.177	109.09	149.974	163.236	138.377
KMT2B	704.842	-0.416271	0.0895248	-4.64979	3.32281e-06	5.1444e-05	865.503	772.576	822.535	819.312	761.58	733.584	796.652	773.367	594.645	648.858	555.368	611.346	614.766	497.691
EDN1	267.022	1.59649	0.34353	4.64731	3.36292e-06	5.20116e-05	104.342	74.4652	187.266	209	114.493	108.948	209.472	218.507	241.83	397.045	397.683	519.759	385.71	569.786
EWSR1	3233.72	-0.412083	0.0886797	-4.64687	3.37014e-06	5.20699e-05	3985.06	3884.16	3412.89	3556.98	3740.69	3659.85	3451.33	3442.92	2604.05	2985.45	2488.25	2691.53	2921.13	2447.76
SERF2	1894.12	0.489388	0.105334	4.64608	3.383e-06	5.22152e-05	1804.58	1647.54	1522.32	1573.46	1703.16	1528.5	1527.33	1742.33	2452.18	1943.06	2228.41	2571.32	2083.89	2189.61
LIX1L	454.012	-0.678287	0.146024	-4.64504	3.40018e-06	5.24267e-05	480.24	519.926	582.405	561.837	521.771	560.074	598.726	525.399	272.205	395.874	302.477	330.86	415.988	288.382
MKI67	16040.1	-0.721925	0.15545	-4.6441	3.41561e-06	5.26109e-05	19112	20170.8	19899.4	19808.9	19350.5	18668.1	19180.7	18398.8	12125.4	14455.2	9013.82	11293.9	14146.2	8937.5
PPID	1188.47	-0.340464	0.0733265	-4.64312	3.4319e-06	5.28079e-05	1328.35	1299.15	1277.71	1308.83	1311.83	1308.18	1341.77	1227.57	964.984	1102.12	1090.9	931.902	1104.47	1040.73
CAST	5196.35	0.660357	0.14226	4.64192	3.45191e-06	5.30617e-05	3669.36	4013.14	4128.8	4001.99	4136	4371.65	4293.34	4256.38	5864.67	5674.58	8121.26	5815.8	6012.07	8389.81
LOC100847958	130.642	0.695454	0.149868	4.64043	3.47679e-06	5.33898e-05	128.421	101.06	95.8728	100.924	108.797	96.8428	100.612	117.846	151.874	142.889	169.586	178.596	146.122	189.541
SLC51B	76.7331	1.21401	0.261711	4.63875	3.50527e-06	5.37723e-05	41.4692	35.9028	52.8644	60.3955	46.7088	43.5793	59.3778	59.7416	79.4418	100.725	130.908	93.8772	105.313	163.959
CPM	144.824	1.72471	0.371833	4.63841	3.51103e-06	5.38061e-05	29.4298	38.5623	64.5125	54.8327	55.253	50.0354	124.528	99.8421	290.897	131.177	273.717	318.266	179.033	317.452
CLRN3	14.4756	6.45372	1.39189	4.63665	3.54093e-06	5.42092e-05	0	0	0	0.794677	0.569619	0.807023	0	0	4.67305	23.4245	76.3631	4.57937	26.3283	65.1184
SOWAHB	43.2118	2.1978	0.474242	4.63434	3.58073e-06	5.47631e-05	16.0526	5.31894	11.6481	10.3308	22.2151	17.7545	18.9679	13.094	52.5718	38.6504	149.751	65.2561	56.6059	126.748
ISG15	57.3588	2.00672	0.433105	4.63334	3.59807e-06	5.4917e-05	2.67543	5.31894	5.37604	2.38403	60.9492	45.1933	31.3383	40.1005	21.0287	10.541	41.6526	230.114	84.2506	222.1
PAICS	6098.94	-0.448216	0.0967339	-4.63349	3.59545e-06	5.4917e-05	6898.61	7092.81	6391.22	6627.61	7047.33	7545.67	6706.39	6824.45	4815.57	5556.29	4416.17	4759.11	5871.22	4832.72
OS9	1647.41	0.501423	0.10825	4.63207	3.62024e-06	5.51996e-05	1420.66	1287.18	1381.64	1389.1	1479.3	1313.83	1412.7	1436.25	2079.51	1667.82	2206.6	2175.2	1712.66	2101.23
LEF1	661.347	1.13726	0.245613	4.63028	3.65165e-06	5.56223e-05	401.315	393.602	348.547	355.221	427.784	430.95	376.884	365.815	1505.89	674.625	1336.85	1149.42	588.438	903.518
TMEM59	714.968	0.82885	0.179151	4.62655	3.71803e-06	5.65762e-05	572.543	482.694	524.164	557.863	539.999	520.53	540.173	583.504	903.066	702.735	1174.21	1006.32	712.181	1189.57
MPLKIP	282.335	-0.51754	0.11187	-4.62627	3.72315e-06	5.65971e-05	314.363	303.18	310.914	293.236	308.733	342.985	341.422	315.894	227.811	285.779	222.147	209.506	248.803	227.915
GOLGA7	643.853	0.544249	0.117668	4.6253	3.74053e-06	5.67969e-05	478.903	511.948	508.036	553.89	569.619	602.039	584.706	571.228	623.852	654.714	811.234	793.376	750.357	1000.03
BANK1	9.29391	2.59294	0.560629	4.62506	3.74495e-06	5.67969e-05	6.68858	5.31894	2.68802	4.76806	3.98733	1.61405	1.64938	3.27351	16.3557	11.7122	22.8098	17.1727	15.797	16.2796
SMIM3	171.182	0.762549	0.164879	4.62491	3.74758e-06	5.67969e-05	119.057	105.049	129.921	134.3	158.924	129.931	152.568	126.849	230.148	181.54	205.288	278.197	184.298	260.474
EDN2	33.6817	2.86554	0.619676	4.62425	3.75952e-06	5.69031e-05	6.68858	9.30815	3.58403	5.56274	15.3797	24.2107	2.47408	6.54702	21.0287	31.6231	78.3465	88.1529	46.0746	132.563
CDKL2	212.187	0.794692	0.171858	4.62411	3.76212e-06	5.69031e-05	184.605	179.514	183.681	156.551	145.822	144.457	141.022	162.039	257.018	271.724	373.882	259.879	198.779	311.638
PUS10	166.558	-0.60268	0.130344	-4.62375	3.76856e-06	5.69434e-05	196.644	192.812	189.954	185.954	201.075	219.51	187.205	182.498	122.667	142.889	119.007	130.512	144.806	116.283
PPAT	1360.79	-0.351317	0.0759852	-4.62349	3.77343e-06	5.696e-05	1439.38	1533.18	1387.92	1449.49	1532.84	1523.66	1504.24	1461.62	1200.97	1337.54	1136.52	1183.77	1280.87	1079.11
MEN1	730.984	-0.525692	0.113734	-4.62212	3.79834e-06	5.72786e-05	820.02	905.55	856.583	839.974	809.428	788.462	847.783	838.837	658.899	639.488	516.691	622.795	625.298	463.969
CYTH2	509.642	0.461705	0.0999038	4.6215	3.80983e-06	5.73788e-05	490.942	428.175	490.116	491.111	432.341	403.512	410.696	444.379	632.029	525.88	640.657	611.346	518.668	615.137
RUSC2	95.6273	0.970475	0.209998	4.62135	3.81258e-06	5.73788e-05	74.9121	85.103	95.8728	89.0038	70.0631	51.6495	70.0988	60.56	99.3022	110.095	160.66	112.195	109.263	150.005
RRP7A	1112.59	-0.564158	0.122088	-4.62092	3.82038e-06	5.74389e-05	1339.05	1416.17	1220.36	1226.98	1363.1	1351.76	1223.84	1152.28	973.162	979.143	746.772	953.655	893.847	736.071
PPP1R8	747.509	-0.482407	0.104488	-4.61689	3.8954e-06	5.85085e-05	865.503	839.063	798.342	847.126	907.973	810.251	798.302	822.47	672.919	736.7	570.244	570.132	681.904	544.204
ACP1	1683	-0.542517	0.117517	-4.6165	3.90258e-06	5.85581e-05	2013.26	2081.04	1874.45	1853.19	2028.98	1989.31	1890.19	1810.25	1342.33	1595.21	1106.77	1273.07	1498.08	1205.85
DOCK3	627.005	-0.41457	0.0898188	-4.61563	3.91907e-06	5.87471e-05	650.13	682.154	749.062	754.149	672.15	671.443	705.936	670.252	565.439	575.071	549.418	500.297	577.907	454.666
NDUFA3	292.193	0.543807	0.117925	4.61146	3.99844e-06	5.98159e-05	296.973	264.617	260.738	267.806	225.569	247.756	227.615	225.054	348.142	302.176	413.551	359.481	309.358	341.872
FMNL3	2286.26	-0.494769	0.107296	-4.61127	4.00226e-06	5.98159e-05	2518.92	2429.43	2479.25	2435.69	2878.85	2860.09	2605.2	2524.7	1991.89	1832.97	1666.1	2306.86	1811.39	1666.33
MAP3K4	1705.43	-0.500878	0.108617	-4.6114	3.99975e-06	5.98159e-05	2006.58	2174.12	1941.65	1872.26	1954.36	2040.96	1783.81	1780.79	1584.16	1502.68	1226.77	1448.23	1398.03	1161.67
PLBD2	5689.84	0.495083	0.107383	4.61045	4.01808e-06	5.9993e-05	5041.85	4616.84	5314.22	5183.68	4537.01	4429.75	4987.74	5033.84	7723.38	5956.85	6764.58	7522.77	5846.2	6699.06
AHCY	4225.69	-0.234751	0.0509397	-4.60842	4.05743e-06	6.05207e-05	4696.72	4660.72	4642.21	4411.25	4488.6	4608.1	4673.53	4438.06	3516.47	3875.58	3541.46	3734.48	3997.96	3874.55
RCAN1	7726.8	0.709771	0.15405	4.6074	4.07744e-06	6.07164e-05	5140.85	4870.82	7210.17	7116.33	4938.03	4983.37	6137.36	6380.07	10271.4	10948.6	12655.4	8685.93	9091.17	9745.67
PPIH	609.604	-0.449696	0.0976042	-4.60734	4.07859e-06	6.07164e-05	773.2	688.803	652.293	682.628	726.264	682.742	654.805	690.711	477.819	535.249	455.203	536.932	537.098	440.712
RPL28	4631.9	-0.31686	0.0687808	-4.60682	4.08883e-06	6.08088e-05	5536.81	5365.48	5021.22	4863.42	4872.52	4861.51	5175.76	5096.04	4081.91	4159.02	3766.58	4146.62	4200.68	3698.96
DHX9	6958.37	-0.356518	0.077409	-4.60563	4.1121e-06	6.10946e-05	7574.15	7566.19	7454.78	7675.79	7872.7	8071.04	7675.41	7573.27	5689.43	6469.84	5517.98	5629.19	6850.63	5796.7
TEX13A	55.597	2.92704	0.635692	4.60449	4.13477e-06	6.1371e-05	8.0263	10.6379	13.4401	9.53613	14.8101	16.9475	14.0198	11.4573	30.3748	141.718	180.495	14.883	152.704	159.308
ZNF503	34.1186	1.54399	0.335435	4.60294	4.16573e-06	6.17698e-05	12.0395	22.6055	12.5441	20.6616	21.6455	19.3686	26.3901	18.8227	46.7305	29.2806	59.5037	56.0973	44.7582	87.2122
RUVBL2	1513.52	-0.620616	0.134877	-4.60134	4.1979e-06	6.21858e-05	1914.27	1884.23	1776.78	1756.24	1782.34	1743.98	1736.8	1797.98	1077.14	1369.16	904.456	1191.78	1320.37	933.752
DVL1	399.596	0.490047	0.106545	4.59944	4.23622e-06	6.26919e-05	338.442	316.477	366.467	348.069	341.771	322.809	382.657	346.992	420.574	448.579	495.864	536.932	425.202	503.505
LOC100336941	9.46524	2.93475	0.638134	4.59896	4.2461e-06	6.27766e-05	2.67543	1.32974	0.896007	3.17871	1.13924	1.61405	2.47408	6.54702	11.6826	18.7396	16.8594	11.4484	23.6955	30.2336
HPF1	408.339	-0.456695	0.0993468	-4.59698	4.28663e-06	6.33137e-05	453.486	466.737	467.716	496.673	438.607	435.793	470.899	455.837	351.647	370.107	323.303	333.149	372.546	280.242
CMTM8	83.8285	0.992742	0.215991	4.59621	4.30239e-06	6.34844e-05	72.2367	75.7949	66.3045	50.8593	50.6961	61.3338	56.9037	50.7394	99.3022	117.122	145.784	97.3117	90.8327	138.377
DNAJB6	1913.68	0.418333	0.0910291	4.5956	4.31509e-06	6.36097e-05	1522.32	1539.83	1648.65	1807.89	1739.05	1637.45	1823.39	1751.33	1898.42	2125.77	2330.56	2166.04	2287.93	2512.87
COPS4	1037.7	-0.321872	0.0700548	-4.59457	4.33635e-06	6.38606e-05	1125.02	1174.16	1157.64	1095.07	1117.02	1140.32	1105.09	1058.98	885.542	1051.76	961.977	855.198	926.757	873.285
CKAP2L	1147.64	-0.502053	0.109286	-4.59396	4.34918e-06	6.39249e-05	1150.44	1195.43	1321.61	1365.26	1308.41	1317.87	1398.68	1408.43	883.206	1037.7	801.317	971.972	1072.88	833.748
LOC507581	99.6047	0.822034	0.178932	4.59412	4.34582e-06	6.39249e-05	85.6139	71.8057	77.0566	77.0837	76.3289	79.8953	50.3062	85.9297	117.994	145.232	138.842	124.788	126.376	137.214
PRR15L	63.1662	1.34211	0.292411	4.58979	4.43698e-06	6.51519e-05	66.8858	83.7733	58.2405	57.2168	18.2278	32.2809	21.442	45.8292	92.2927	98.3828	88.2638	58.387	72.4029	90.7007
DDIT4	373.918	1.11823	0.243662	4.58929	4.44762e-06	6.52447e-05	366.534	361.688	249.09	258.27	205.063	250.177	155.042	171.041	723.154	468.49	754.705	541.511	297.51	432.572
FAM71F2	49.2345	1.07148	0.233511	4.58857	4.46295e-06	6.53426e-05	26.7543	30.5839	28.6722	30.1977	31.329	38.7371	32.9877	26.1881	82.9466	62.0749	95.2059	57.2422	68.4536	77.9096
ULBP13	421.173	0.684854	0.149252	4.58858	4.46271e-06	6.53426e-05	329.078	313.817	295.682	330.586	350.885	345.406	340.598	319.167	508.194	472.003	657.516	581.58	414.671	637.23
OGA	1352.78	0.554022	0.120755	4.58797	4.47578e-06	6.5467e-05	1115.66	1112.99	1277.71	1284.2	1071.45	1024.92	1108.39	1120.36	1579.49	1526.11	1956.68	1456.24	1415.15	1889.6
SPATA13	126.072	-0.918481	0.200238	-4.58695	4.49764e-06	6.5723e-05	218.048	199.46	149.633	149.399	135	163.826	127.827	124.393	88.7879	103.068	86.2804	74.4148	85.5671	59.3043
WDR45	239.003	1.00728	0.219805	4.58262	4.59184e-06	6.70347e-05	197.982	194.141	163.073	127.943	193.101	180.773	171.536	160.402	294.402	211.992	386.774	385.812	260.65	417.456
MAD2L1	860.543	-0.482121	0.105228	-4.58169	4.61234e-06	6.72689e-05	949.779	1118.31	964.104	1007.65	1026.45	1010.39	959.941	905.944	668.246	757.782	581.153	704.079	763.521	630.253
DLG2	17.6216	2.65886	0.580707	4.57867	4.67951e-06	6.81827e-05	2.67543	5.31894	3.58403	2.38403	4.55695	3.22809	9.07161	4.91027	40.8892	17.5684	50.5782	38.9247	11.8477	51.1645
NSA2	1411.27	-0.279325	0.0610102	-4.57834	4.68686e-06	6.82239e-05	1502.26	1562.44	1498.12	1482.07	1614.3	1534.96	1594.95	1485.36	1231.35	1240.33	1156.36	1219.26	1374.34	1261.67
SUV39H1	473.815	-0.692617	0.151316	-4.5773	4.71012e-06	6.84964e-05	549.802	550.51	596.741	557.069	577.024	567.337	576.459	556.497	351.647	406.415	285.618	382.378	421.253	254.66
TMEM86A	408.261	0.934578	0.204207	4.57661	4.72568e-06	6.86566e-05	276.907	275.255	364.675	367.141	237.531	234.844	331.526	333.898	432.257	517.681	715.036	481.979	501.555	645.37
BCL2L13	3069.54	0.273298	0.059728	4.57572	4.74591e-06	6.88841e-05	3082.1	2841.64	2954.14	2893.42	2662.4	2661.56	2866.63	2942.07	3331.88	3193.93	3459.15	3408.2	3194.94	3481.51
MSANTD2	251.873	-0.471334	0.103024	-4.57497	4.76293e-06	6.90647e-05	260.855	276.585	260.738	274.958	292.215	288.107	290.291	270.883	233.652	250.642	208.263	200.348	219.842	198.844
A2ML1	78.4905	1.13607	0.248335	4.57475	4.76798e-06	6.90716e-05	46.8201	37.2326	44.8004	40.5285	74.0505	64.5619	51.9556	44.1924	113.321	77.3008	116.032	156.844	88.1999	143.028
RBM39	2239.33	-0.283611	0.0620115	-4.57352	4.79599e-06	6.93443e-05	2268.77	2289.8	2439.83	2492.11	2423.16	2427.53	2446.86	2302.92	2018.76	2272.17	2050.89	1902.73	2052.29	1962.86
EIF4A3	2001.54	-0.405913	0.0887513	-4.57361	4.79396e-06	6.93443e-05	2334.32	2313.74	2288.4	2276.75	2218.1	2132.16	2178.84	2170.34	1703.33	1948.92	1529.25	1647.43	1820.6	1459.35
SFT2D2	194.421	0.645317	0.141118	4.5729	4.81011e-06	6.94156e-05	177.916	184.833	165.761	128.738	137.278	158.984	131.126	153.037	276.878	250.642	276.692	207.217	225.107	247.683
CXCL3	21.4116	2.54465	0.556448	4.57301	4.80757e-06	6.94156e-05	12.0395	3.98921	5.37604	3.97339	5.69619	5.64916	7.42223	6.54702	46.7305	33.9655	58.512	72.1251	14.4806	23.2566
AFAP1L2	522.079	0.921897	0.201642	4.57194	4.83224e-06	6.96682e-05	321.052	279.244	355.715	321.844	435.758	453.547	376.059	428.012	522.213	529.393	880.655	738.424	625.298	1041.89
SQSTM1	2669.14	0.901648	0.197231	4.57154	4.84164e-06	6.97372e-05	2185.83	1973.33	2061.71	1898.48	1932.72	1915.87	1792.06	1879.81	3439.36	2719.58	5033.02	3654.34	2473.55	4408.29
SNPH	38.8731	3.57183	0.781714	4.56923	4.89525e-06	7.04422e-05	22.7412	10.6379	6.27205	3.97339	10.8228	12.1053	1.64938	2.45513	132.014	18.7396	79.3383	128.222	21.0627	94.1892
ZW10	809.059	-0.431804	0.0945294	-4.56794	4.92549e-06	7.08097e-05	864.165	884.274	943.496	882.886	905.124	923.235	948.395	994.329	627.356	686.337	569.252	720.106	776.686	601.183
KNOP1	586.874	-0.386204	0.0845721	-4.56657	4.95779e-06	7.12063e-05	634.078	648.911	640.645	692.164	655.631	694.04	620.168	631.788	528.054	510.654	469.088	542.656	454.164	494.202
C17H12orf43	283.269	-0.46659	0.102203	-4.56535	4.98662e-06	7.15523e-05	331.754	323.126	326.147	321.844	304.176	339.757	315.032	308.529	238.325	263.525	206.28	227.824	230.373	229.077
ZNF239	326.886	-0.449401	0.098544	-4.56041	5.10544e-06	7.31876e-05	304.999	345.731	344.067	352.042	383.923	409.161	371.936	362.541	302.58	262.354	298.51	301.094	271.182	266.288
PLBD1	28.2183	2.60353	0.570934	4.56013	5.11224e-06	7.32156e-05	6.68858	6.64868	14.3361	15.0989	4.55695	8.87726	9.8963	13.094	12.8509	64.4173	74.3796	28.6211	65.8208	69.7697
ATP6V0E1	733.08	0.531152	0.116569	4.55656	5.19987e-06	7.44001e-05	588.595	648.911	623.621	603.955	595.252	586.706	685.319	663.705	838.812	746.07	943.134	975.407	754.307	1009.34
MRI1	204.421	-0.679406	0.149124	-4.55598	5.21423e-06	7.45348e-05	262.192	248.66	235.65	220.126	231.265	230.002	263.901	242.24	163.557	182.711	127.933	160.278	172.451	120.934
L1CAM	8055.47	0.516311	0.113413	4.55249	5.30149e-06	7.57105e-05	7040.4	6834.84	6741.56	6571.98	7252.96	6607.91	6651.14	6596.13	10822.8	8279.38	10299.1	11134.7	8034.09	9909.63
RAD51	844.465	-0.435357	0.0956804	-4.55011	5.36168e-06	7.63588e-05	993.924	990.653	965	971.89	933.605	943.41	951.694	932.951	732.5	735.529	583.136	709.803	771.42	606.997
RRM1	8059.15	-0.560106	0.123096	-4.55016	5.36061e-06	7.63588e-05	9263.69	9757.6	9607.89	9678.37	8376.82	9175.86	9307.47	9426.9	6530.58	7607.1	5635	5753.98	7479.88	5226.92
ASH2L	747.567	-0.385913	0.0848143	-4.5501	5.36206e-06	7.63588e-05	836.073	824.436	830.599	861.43	828.226	836.076	828.815	818.378	703.293	633.632	562.31	644.547	687.169	570.949
PLPP1	602.843	0.548425	0.120552	4.5493	5.38241e-06	7.65763e-05	454.824	531.894	502.66	456.145	514.935	547.162	485.743	497.574	723.154	683.995	800.325	756.741	605.552	879.099
SUSD1	847.968	0.671245	0.147558	4.54902	5.38968e-06	7.66075e-05	564.516	603.7	836.871	772.426	562.214	600.425	719.956	754.545	1021.06	1112.66	1176.19	989.145	1033.39	1124.46
ATPAF1	902.993	-0.271447	0.0596804	-4.54834	5.40708e-06	7.67826e-05	951.117	961.399	928.263	948.845	995.124	946.638	993.753	1000.06	853.999	830.398	785.449	832.301	831.975	782.584
PSMD9	817.484	-0.318635	0.0700651	-4.5477	5.42356e-06	7.69442e-05	837.411	932.144	882.567	889.244	917.086	869.971	910.46	912.491	688.106	755.44	679.334	697.21	697.701	775.607
PATJ	1012.48	0.614355	0.135133	4.54629	5.45999e-06	7.73883e-05	834.735	860.339	762.502	719.978	872.087	980.533	701.813	776.641	1269.9	1127.89	1443.96	1274.21	1107.11	1443.07
CRIP1	1981.39	0.933952	0.205532	4.54406	5.51804e-06	7.81377e-05	1658.77	1678.13	1377.16	1284.99	1392.15	1571.27	1235.39	1397.79	3387.96	1859.9	2878	3425.37	1978.57	2614.04
PPWD1	607.493	-0.506489	0.111492	-4.54282	5.55077e-06	7.85275e-05	654.143	712.738	650.501	743.023	649.935	719.865	676.247	640.79	552.588	623.091	462.145	449.923	529.199	440.712
CDAN1	253.989	-0.533923	0.117584	-4.54079	5.60437e-06	7.91374e-05	351.82	368.337	316.291	353.631	261.455	232.423	279.57	250.424	213.792	203.793	192.395	176.306	197.462	158.145
SGSH	111.137	0.983998	0.216693	4.54097	5.59953e-06	7.91374e-05	90.9647	59.8381	73.4726	79.4677	79.177	62.1408	84.9432	86.7481	143.696	128.835	203.304	170.582	117.161	175.587
LOC104968444	145.582	0.71686	0.157891	4.54023	5.61923e-06	7.92732e-05	117.719	107.709	135.297	97.7453	113.354	104.106	105.561	100.66	186.922	219.019	226.114	141.961	184.298	197.681
FRMD4A	647.798	-0.494218	0.108862	-4.53985	5.62932e-06	7.93414e-05	755.81	831.084	732.934	760.506	686.96	627.057	692.741	715.262	651.89	632.461	531.566	510.6	534.465	405.827
ING1	570.923	-0.619313	0.136433	-4.53933	5.6432e-06	7.94628e-05	791.928	723.376	695.302	679.449	624.302	627.864	592.953	599.871	464.968	593.811	403.633	401.84	463.379	330.243
ABCF2	2657.93	-0.28497	0.0627832	-4.53896	5.65331e-06	7.95309e-05	2904.18	3088.97	2818.84	2843.35	2880.56	2901.25	2907.04	2771.03	2373.91	2492.37	2173.87	2427.07	2416.94	2211.7
LOC107133116	15.9691	2.30477	0.507808	4.53867	5.66113e-06	7.95375e-05	2.67543	7.97841	8.96007	8.74145	5.12657	6.45619	5.77284	5.72865	38.5526	15.2259	33.7188	40.0695	13.1642	31.3964
ZBTB7B	899.702	0.493959	0.108836	4.53855	5.66431e-06	7.95375e-05	980.546	839.063	800.134	757.327	674.998	772.321	658.929	750.453	1205.65	1022.48	1119.66	1066.99	903.062	1044.22
CDC23	465.913	-0.671323	0.147956	-4.53732	5.69747e-06	7.98963e-05	596.622	575.775	568.069	549.122	549.113	568.951	513.783	512.305	376.18	390.018	310.411	319.411	438.367	254.66
CD99	7845.37	0.497991	0.109757	4.53721	5.70045e-06	7.98963e-05	6045.14	6326.88	7490.62	7442.95	5698.47	6157.59	7206.98	7141.17	10035.4	8816.98	9722.91	9667.06	8521.16	9561.94
NSMCE4A	729.465	-0.499132	0.110016	-4.53692	5.70819e-06	7.99306e-05	865.503	904.22	797.446	824.875	931.897	821.55	850.257	862.57	519.876	561.016	430.41	554.104	710.865	577.926
TMEM108	15.4408	1.89358	0.417394	4.53666	5.71522e-06	7.99548e-05	4.01315	6.64868	9.85608	9.53613	6.83543	4.84214	5.77284	11.4573	33.8796	23.4245	19.8346	28.6211	22.3791	29.0707
E2F4	1087.32	-0.55823	0.123156	-4.5327	5.82359e-06	8.13954e-05	1203.95	1166.18	1331.47	1327.91	1224.68	1159.69	1331.05	1356.87	839.98	973.287	721.978	792.232	1017.59	775.607
MCRS1	1213.73	-0.480957	0.106128	-4.53187	5.84632e-06	8.16375e-05	1331.03	1384.25	1476.62	1402.61	1290.76	1333.2	1387.13	1470.63	1007.04	1137.26	826.11	1029.21	1037.34	879.099
PRR5	587.447	0.442378	0.0976437	4.53053	5.88346e-06	8.20803e-05	593.946	530.564	541.188	510.977	427.214	465.652	502.237	501.666	802.596	666.427	752.722	690.341	630.563	608.16
ITGB3BP	256.644	-0.600663	0.13259	-4.53024	5.89172e-06	8.21196e-05	283.596	289.882	254.466	272.574	317.847	353.476	282.869	276.612	197.436	237.759	217.189	174.016	202.728	232.566
RDH11	698.646	0.607318	0.134111	4.52848	5.94082e-06	8.25853e-05	492.28	470.726	482.948	517.335	733.1	649.654	644.909	583.504	712.639	624.262	885.614	1036.08	829.342	1118.64
SLC17A9	398.788	0.731066	0.161431	4.52867	5.9357e-06	8.25853e-05	361.184	329.774	280.45	318.666	338.923	307.476	304.311	273.338	621.515	394.703	528.591	590.739	425.202	508.156
TMEM50A	1508.37	0.315916	0.0697624	4.52846	5.94154e-06	8.25853e-05	1411.29	1304.47	1219.47	1252.41	1480.44	1352.57	1495.99	1448.53	1473.18	1602.23	1680.98	1801.98	1817.97	1775.64
CRYBB1	54.3751	1.0032	0.221545	4.52818	5.94929e-06	8.26168e-05	49.4955	47.8705	48.3844	38.9392	33.6075	37.1231	28.8642	46.6475	75.937	72.6159	63.4706	80.139	57.9223	80.2352
SH3GL3	857.372	0.821719	0.181534	4.52654	5.99582e-06	8.31865e-05	559.166	575.775	760.71	794.677	518.353	610.11	672.124	684.982	986.013	1151.31	1397.35	902.137	1024.17	1366.32
CHTF18	594.754	-0.837668	0.185105	-4.52537	6.02887e-06	8.35682e-05	848.112	844.382	752.646	699.316	698.922	742.461	691.916	653.884	435.762	486.058	302.477	438.475	464.695	267.451
AES	3271.19	0.347392	0.0767934	4.52373	6.07604e-06	8.41448e-05	3068.72	2959.99	3076.89	3139.77	2737.59	2715.63	3050.53	3072.19	3321.37	3650.71	3961.96	3624.57	3500.35	3916.41
STAG1	802.592	-0.619571	0.137018	-4.52183	6.13069e-06	8.48238e-05	963.156	1026.56	924.679	873.35	919.365	1032.99	898.914	857.66	703.293	721.474	502.806	589.594	700.333	522.11
KREMEN1	3473.46	0.69501	0.153716	4.5214	6.14326e-06	8.49198e-05	2799.84	2595.64	3438.88	3267.71	2002.78	2145.07	2935.9	3129.48	4285.18	4757.51	4873.35	4006.95	4119.07	4271.07
DYRK3	529.131	0.480626	0.106313	4.52084	6.15938e-06	8.50649e-05	549.802	543.862	458.756	472.833	442.024	443.863	385.131	401.005	634.366	631.29	695.202	588.449	514.719	646.533
C11H9orf50	80.1413	1.72453	0.381583	4.51942	6.20089e-06	8.55598e-05	56.1841	77.1246	28.6722	22.251	52.4049	45.1933	30.5136	30.28	164.725	87.8418	132.892	140.816	96.0984	156.982
MAN2C1	304.965	-0.509363	0.112745	-4.51783	6.24753e-06	8.61246e-05	410.679	344.401	325.251	357.605	357.721	359.125	326.578	327.351	254.681	254.156	230.081	270.183	223.791	227.915
MTFR1	3823.71	0.817189	0.181052	4.51357	6.37452e-06	8.77951e-05	2410.57	2392.19	2847.51	2984.01	2873.73	3024.72	3571.74	3518.21	3271.13	4289.02	5186.74	4361.85	5522.37	7278.15
GAA	369.004	1.07099	0.237347	4.51234	6.41174e-06	8.82272e-05	230.087	163.557	308.226	296.415	217.594	184.001	281.22	303.618	461.463	472.003	695.202	508.31	439.683	604.671
STK32C	21.9317	1.96209	0.434891	4.51168	6.43158e-06	8.84195e-05	6.68858	7.97841	12.5441	10.3308	13.1012	9.68428	9.8963	9.82054	28.0383	17.5684	56.5285	38.9247	28.9612	56.9786
HNRNPU	12887.5	-0.332374	0.0737042	-4.50956	6.49625e-06	8.92273e-05	14205.2	14096.5	13799.4	14026.8	14398.3	14467.5	14418.9	14076.9	10655.7	12180.7	9927.2	10719.2	12448	11005
PEX5	671.317	0.372903	0.0827347	4.50721	6.56846e-06	9.01372e-05	684.911	626.305	611.077	631.768	571.897	564.109	550.069	585.14	795.586	703.906	868.754	757.886	701.65	745.373
PRKRIP1	334.845	-0.457034	0.101416	-4.50653	6.58972e-06	9.03467e-05	385.262	397.591	399.619	359.194	344.05	359.932	389.254	372.362	260.522	312.717	307.436	246.141	271.182	282.567
SNX24	221.533	0.835859	0.185527	4.50531	6.62755e-06	9.0783e-05	212.697	192.812	159.489	159.73	172.025	162.212	152.568	160.402	252.344	256.498	354.047	236.983	254.068	375.594
ELMOD1	16.4979	3.24609	0.720789	4.50353	6.68346e-06	9.14658e-05	5.35087	5.31894	1.79201	3.97339	3.98733	10.4913	0.824692	0	43.2257	14.0547	32.727	52.6628	26.3283	30.2336
MICALL1	3435.2	0.392357	0.0871434	4.50242	6.71834e-06	9.18598e-05	2881.44	2811.06	3246.23	3237.51	2916.45	2843.14	3314.44	3233.41	3533.99	4019.64	3941.13	3733.33	4190.15	4190.84
DYNC1LI2	1356.69	0.373283	0.0829174	4.50186	6.73606e-06	9.20189e-05	1141.07	1150.22	1254.41	1397.84	1136.39	1124.18	1247.76	1234.93	1564.3	1549.53	1587.76	1479.14	1488.87	1637.26
CCNE1	261.877	0.560012	0.124412	4.50128	6.75453e-06	9.21045e-05	250.153	281.904	214.146	225.688	199.936	197.721	189.679	180.043	386.695	329.114	362.973	279.342	251.436	317.452
HSD17B11	117.394	0.790481	0.175608	4.50139	6.75107e-06	9.21045e-05	85.6139	77.1246	88.7047	75.4943	79.177	85.5445	107.21	90.84	143.696	160.458	180.495	122.498	160.603	186.053
NFYB	669.277	-0.533691	0.118569	-4.50108	6.76077e-06	9.21064e-05	864.165	885.604	689.03	712.825	846.454	790.883	695.215	690.711	543.242	561.016	522.641	555.249	538.414	474.434
SEC22B	2172.11	0.414193	0.0920685	4.49875	6.83543e-06	9.30395e-05	1989.18	2041.14	1795.6	1922.32	1893.41	1873.91	1859.68	1707.14	2838.88	2375.24	2784.77	2558.72	2139.18	2630.32
FBP2	19.4951	2.44563	0.543724	4.49792	6.86203e-06	9.33174e-05	8.0263	9.30815	1.79201	0.794677	6.83543	8.87726	3.29877	4.91027	29.2065	35.1367	66.4458	27.4762	28.9612	41.8618
CALM1	27184.7	0.415303	0.0923974	4.49474	6.96542e-06	9.46382e-05	24513.7	24803.5	24091.8	24519	23180.1	23857.2	23238.2	23538.2	32453.1	27636.2	34926.7	31801.5	27056.3	34969.8
CENPW	442.176	-0.557002	0.123934	-4.49434	6.97856e-06	9.47315e-05	528.398	542.532	480.26	496.673	514.935	509.232	509.659	504.939	377.348	411.1	274.709	341.163	384.394	315.127
BOLA-DOB	27.8745	2.53983	0.565478	4.49148	7.0729e-06	9.59258e-05	1.33772	2.65947	12.5441	8.74145	5.12657	4.84214	10.721	22.9146	52.5718	29.2806	51.5699	49.2283	52.6567	86.0494
TXN	5548.86	0.673322	0.150007	4.4886	7.1693e-06	9.71459e-05	4601.75	4404.08	4191.52	4128.35	4862.84	4729.96	4274.38	4253.11	6952.32	5527.01	8086.55	7463.23	5503.94	8704.94
ANKRD10	1157.69	-0.647379	0.144237	-4.48831	7.17911e-06	9.71916e-05	1228.02	1035.86	1486.48	1594.92	1315.82	1234.75	1523.21	1422.34	873.86	949.863	910.407	913.585	966.25	752.35
SMC2	2570.97	-0.786043	0.175165	-4.48744	7.20839e-06	9.75006e-05	2837.3	3160.78	3407.52	3316.98	2730.75	3031.99	3155.27	3190.04	1852.86	2457.23	1584.78	1437.92	2340.59	1489.58
ZBED8	464.208	-0.450555	0.100444	-4.48563	7.2699e-06	9.82445e-05	474.889	545.191	576.133	574.552	462.531	483.407	526.978	499.211	449.781	433.353	390.741	366.35	384.394	331.406
NCL	24326.1	-0.429847	0.0958357	-4.48525	7.28275e-06	9.83301e-05	28010.5	28951	25764.7	26669.4	28724.2	28171.6	26722.5	25527.7	20517	22848.2	17887.8	20105.7	22452.8	18212.2
KCTD3	2168.07	-0.351638	0.0784035	-4.48498	7.29214e-06	9.83689e-05	2188.5	2335.01	2324.24	2302.18	2358.79	2634.12	2387.48	2420.76	1857.54	2043.79	1737.51	1782.52	2114.16	1866.34
DGKZ	1354.03	-0.393942	0.0878406	-4.48473	7.30055e-06	9.83945e-05	1653.42	1640.89	1586.83	1537.7	1316.96	1434.08	1435.79	1481.26	1210.32	1325.83	1097.84	1111.64	1170.29	953.52
2021-03-08	617.17	0.499217	0.111364	4.48274	7.36902e-06	9.92287e-05	581.907	517.267	532.228	496.673	517.784	534.249	479.971	509.849	800.259	680.481	827.102	738.424	605.552	818.632
PLPP2	610.126	0.656639	0.146518	4.48162	7.40799e-06	9.96646e-05	577.894	530.564	471.3	459.323	455.695	518.916	462.652	456.655	810.773	655.886	905.448	827.722	584.489	824.446
AGA	274.576	0.776639	0.173308	4.48127	7.42014e-06	9.97391e-05	185.943	188.822	230.274	206.616	202.784	212.247	214.42	224.236	383.19	262.354	438.344	419.013	290.928	384.896
LOC104969719	182.567	-0.908615	0.202888	-4.47842	7.5199e-06	0.00010099	169.89	239.352	235.65	253.502	202.215	218.703	256.479	217.689	95.7974	155.773	152.726	92.7323	142.173	123.26
GAS8	239.351	-0.717889	0.160352	-4.47697	7.57104e-06	0.000101586	331.754	313.817	282.242	284.494	299.62	291.335	281.22	255.334	185.754	181.54	128.925	200.348	184.298	130.237
DENND3	897.226	0.664743	0.14854	4.47519	7.63434e-06	0.000102345	743.771	808.479	751.75	686.601	754.745	701.303	700.988	767.639	905.403	1001.4	1261.48	926.178	1097.89	1453.54
ANP32B	4914.75	-0.370415	0.0828044	-4.47337	7.69954e-06	0.000103127	5559.55	5760.41	5780.14	5595.32	5390.3	5261.79	5453.69	5273.63	3753.62	4723.55	3847.91	3955.43	4521.89	3929.2
NPR3	296.417	1.62429	0.363174	4.4725	7.73094e-06	0.000103456	100.329	102.39	252.674	259.859	94.5567	89.5796	225.966	170.223	514.035	527.051	473.054	391.536	535.781	412.804
CASQ1	22.5015	1.31946	0.295097	4.47127	7.77568e-06	0.000103963	13.3772	15.9568	9.85608	14.3042	16.5189	12.9124	13.1951	14.7308	32.7113	30.4518	32.727	33.2005	35.5432	39.5362
PAK1	754.558	0.599322	0.134081	4.46985	7.82752e-06	0.000104563	683.573	691.462	639.749	580.909	581.581	633.513	522.03	583.504	1011.71	851.48	1148.42	805.97	774.053	1055.85
RRM2	6084.75	-0.588498	0.131717	-4.46788	7.89984e-06	0.000105436	7952.73	8627.32	7582.91	7803.73	6212.83	6492.5	6294.87	6019.99	6064.45	5641.79	4012.53	4183.26	4741.73	3555.93
TMEM14A	314.569	0.717355	0.160666	4.46489	8.01107e-06	0.000106826	220.723	226.055	218.626	211.384	313.29	284.879	245.758	232.419	397.209	322.087	403.633	468.241	331.737	527.924
EIF2B5	1065.86	-0.424357	0.0950484	-4.46464	8.0202e-06	0.000106853	1292.23	1260.59	1111.05	1143.54	1307.28	1232.32	1110.86	1123.63	940.45	926.438	804.292	960.524	862.253	846.54
SBSPON	514.957	1.67625	0.375622	4.4626	8.09723e-06	0.000107709	325.065	363.018	139.777	178.802	382.214	381.722	185.556	163.676	917.085	564.53	938.175	922.744	562.11	1184.92
WIPF1	7.37321	4.24784	0.951884	4.46256	8.09866e-06	0.000107709	0	2.65947	0	0	0	1.61405	2.47408	0	16.3557	5.85612	19.8346	18.3175	10.5313	25.5822
OAS1X	161.869	1.32415	0.296759	4.46202	8.11888e-06	0.000107882	4.01315	5.31894	0.896007	3.97339	190.822	213.054	156.691	202.958	24.5335	15.2259	15.8677	713.237	267.233	452.341
WFDC2	112.003	5.08021	1.13885	4.46083	8.16443e-06	0.000108297	18.728	15.9568	4.48004	5.56274	11.3924	12.9124	2.47408	2.45513	21.0287	110.095	617.847	33.2005	111.895	600.02
PRIM2	409.728	-0.400245	0.0897239	-4.46085	8.16348e-06	0.000108297	508.332	497.321	460.548	442.635	467.088	451.126	456.879	461.565	311.926	316.231	316.361	351.467	383.077	311.638
SLC16A5	467.796	0.42622	0.0956181	4.45753	8.29107e-06	0.00010988	401.315	389.612	448.9	406.08	363.986	382.529	416.469	454.2	544.41	535.249	581.153	546.09	518.668	560.484
LOC104972567	22.3485	2.96456	0.665249	4.45631	8.33833e-06	0.00011041	6.68858	5.31894	1.79201	4.76806	3.41771	8.07023	3.29877	9.00216	70.0957	16.3971	46.6112	84.7184	13.1642	39.5362
PPAN	798.585	-0.491926	0.110414	-4.45529	8.37818e-06	0.00011084	897.608	945.442	815.367	852.689	1037.28	932.919	890.667	795.463	726.659	709.762	622.805	641.112	724.029	588.392
LOC112444595	46.5353	1.46134	0.328086	4.45415	8.42251e-06	0.00011129	25.4166	30.5839	28.6722	23.0456	33.6075	24.2107	28.0395	24.5513	61.9179	44.5065	98.1811	60.6767	55.2895	112.794
HEMGN	12.2732	2.65461	0.596001	4.45404	8.42693e-06	0.00011129	1.33772	5.31894	3.58403	3.17871	1.13924	4.03512	3.29877	4.91027	21.0287	30.4518	32.727	11.4484	14.4806	34.8849
FANCI	1171.25	-0.674231	0.151469	-4.45127	8.53631e-06	0.000112636	1210.63	1345.69	1462.28	1465.38	1293.6	1335.62	1428.37	1397.79	845.821	1160.68	885.614	685.761	1086.04	794.212
EDC3	676.143	-0.48635	0.109326	-4.4486	8.643e-06	0.000113944	761.161	727.365	825.223	748.586	759.302	723.093	806.548	826.562	521.045	626.605	471.071	532.352	626.614	510.482
DONSON	666.604	-0.487748	0.109655	-4.44801	8.66688e-06	0.000114159	700.964	687.473	726.662	786.73	767.277	752.953	795.003	720.173	537.4	664.084	567.269	488.848	641.095	496.528
TMEM9	781.33	0.43653	0.0981645	4.44692	8.71104e-06	0.000114641	708.99	652.9	734.726	641.304	654.492	652.882	700.163	752.089	954.47	805.802	883.63	1039.52	842.506	915.147
NFYC	516.642	-0.416226	0.0936339	-4.44525	8.7789e-06	0.000115433	536.424	601.04	593.157	568.989	588.986	560.074	616.869	564.681	448.612	441.552	400.658	452.213	481.808	377.919
MAP1A	179.877	-0.686089	0.154412	-4.44323	8.86174e-06	0.000116421	244.802	248.66	242.818	205.821	210.189	179.966	192.978	207.05	163.557	144.061	109.09	130.512	132.958	105.817
SAFB2	1385.61	-0.303485	0.0683353	-4.44111	8.94942e-06	0.000117471	1503.59	1506.59	1501.71	1485.25	1586.39	1464.75	1509.19	1483.72	1199.8	1346.91	1134.54	1262.76	1259.81	1153.53
LURAP1L	43.6702	1.61163	0.362928	4.44064	8.96933e-06	0.000117528	13.3772	19.946	13.4401	12.7148	46.1391	31.4739	16.4938	22.9146	44.3939	50.3626	69.421	84.7184	59.2387	126.748
TIMP1	652.527	1.27047	0.286098	4.44069	8.96724e-06	0.000117528	452.148	490.672	340.483	369.525	439.176	489.056	345.546	392.003	1232.52	537.592	1033.38	1350.92	573.958	1088.41
RAD51C	598.719	-0.532895	0.120015	-4.44023	8.98628e-06	0.000117596	670.196	602.37	669.317	740.639	730.251	740.04	679.546	641.608	449.781	564.53	444.294	421.302	550.262	477.923
RMI2	300.967	-0.88858	0.200125	-4.44014	8.99013e-06	0.000117596	429.407	343.072	337.795	337.738	416.961	376.073	393.378	387.093	195.1	236.587	121.983	231.258	250.119	156.982
EIF4G2	39082.5	-0.401179	0.0903568	-4.43994	8.99835e-06	0.000117602	42532.7	48353.2	43144.5	43106.5	40391.1	46916.3	42020.5	42108.8	35281.5	35905	30029.5	31312.6	35855.2	30197.5
SEC31A	3662.04	0.24621	0.0554565	4.4397	9.00848e-06	0.000117632	3282.76	3321.68	3510.56	3519.63	3218.92	3253.11	3443.91	3552.58	4055.04	3922.43	4210.88	3863.85	3988.74	4124.55
EME1	125.515	-0.846185	0.190794	-4.43508	9.20387e-06	0.00012008	176.579	156.909	152.321	158.141	186.265	145.264	114.632	131.759	96.9657	111.266	84.2969	76.7045	88.1999	77.9096
TRA2B	4213.12	-0.49426	0.111454	-4.43464	9.22249e-06	0.000120219	4698.06	4935.98	4508.71	4890.44	4922.08	4818.74	4915.16	4677.03	3199.87	4059.46	3061.47	3053.3	4028.23	3215.22
COX6B2	19.7603	-2.55345	0.575855	-4.43418	9.24213e-06	0.000120371	25.4166	29.2542	43.9044	38.1445	24.4936	11.2983	30.5136	27.8249	7.00957	12.8835	13.8842	4.57937	3.94925	3.48849
FAM129A	8335.12	1.15127	0.259713	4.43288	9.29834e-06	0.000120999	4655.25	4610.19	7473.6	7076.6	3832.97	3947.15	6418.58	6391.53	10161.5	11872.7	15953.9	8470.7	10718.3	15108.6
CCDC190	7.35242	4.05857	0.91595	4.431	9.37974e-06	0.000121953	0	1.32974	1.79201	1.58935	1.70886	0	0	1.63676	14.0191	10.541	25.7849	17.1727	5.26567	22.0938
CEP295	731.003	-0.513699	0.115953	-4.43021	9.41396e-06	0.000122292	870.854	876.295	887.943	874.145	753.606	820.743	803.25	756.181	656.563	728.501	557.351	503.731	663.474	481.411
PHF12	749.772	-0.353301	0.0797623	-4.42943	9.44836e-06	0.000122528	877.542	795.182	891.527	928.183	751.897	702.917	743.872	782.369	714.976	783.549	772.556	552.959	621.349	577.926
RNASEH2C	489.258	-0.634563	0.143258	-4.42951	9.44492e-06	0.000122528	620.701	631.624	591.365	572.962	607.783	494.705	583.882	535.219	391.368	427.497	316.361	329.715	447.582	298.847
GALNT2	2549.18	0.376442	0.0850049	4.42847	9.49037e-06	0.000122967	2157.74	2156.83	2297.36	2456.35	2185.63	2070.82	2392.43	2396.21	3042.15	2638.77	3091.22	3022.39	2742.1	3038.47
DNAJA4	637.213	0.584227	0.131959	4.42735	9.53999e-06	0.000123399	509.67	511.948	579.717	619.054	459.682	460.81	538.524	542.585	747.687	741.385	961.977	709.803	675.322	862.819
RPS6	10580.8	-0.415695	0.093889	-4.42752	9.53226e-06	0.000123399	12509	13498.1	10634.7	10710.7	12913.8	12519.4	11359.3	11103.8	8733.92	8913.02	8303.74	9282.39	9093.8	8554.93
HEY1	237.489	0.499503	0.112834	4.42689	9.56013e-06	0.000123553	156.513	140.952	178.305	174.829	236.392	239.686	241.635	219.325	233.652	281.094	228.098	341.163	346.217	306.987
RPRD2	1448.18	-0.296821	0.0670528	-4.42667	9.56971e-06	0.000123571	1559.78	1650.2	1712.27	1656.9	1515.76	1487.34	1537.23	1498.45	1286.26	1398.44	1282.3	1259.33	1315.1	1115.15
LOC112447313	31.2842	2.31665	0.523474	4.42553	9.62057e-06	0.000124082	12.0395	7.97841	16.1281	9.53613	10.8228	11.2983	9.07161	14.7308	29.2065	46.849	99.1728	28.6211	35.5432	106.98
CD320	1341.67	0.909901	0.205608	4.42541	9.62572e-06	0.000124082	1260.13	1099.69	928.263	866.198	1016.77	979.726	875.823	907.581	2111.05	1357.45	2054.86	2201.53	1193.99	1930.3
PPM1G	2188.75	-0.352369	0.0796314	-4.425	9.64412e-06	0.000124107	2437.32	2551.76	2469.4	2521.51	2365.06	2367	2424.59	2347.11	1837.68	2066.04	1669.08	1832.89	2048.34	1704.71
RPL7A	12308.4	-0.400716	0.0905539	-4.42516	9.63713e-06	0.000124107	15338.3	15377.1	13081.7	12538.4	14763.4	14114	13149.7	12769.2	10473.5	10139.3	9442.25	11062.6	10010	10058.5
MMP15	160.881	1.24012	0.280331	4.42376	9.69965e-06	0.000124716	139.123	132.974	129.025	83.4411	111.645	104.106	83.2939	81.8378	322.44	165.143	224.131	321.701	159.286	194.192
THOC3	630.458	-0.528351	0.119456	-4.42296	9.73583e-06	0.000124987	723.705	740.662	668.421	702.495	743.353	758.602	715.832	703.805	524.549	586.783	436.361	489.993	601.602	430.247
SLC39A11	732.656	0.463653	0.104829	4.42293	9.7373e-06	0.000124987	622.038	639.603	668.421	632.563	584.999	638.355	647.383	674.343	792.081	788.234	941.15	842.605	771.42	1013.99
DOCK2	17.818	2.07602	0.469423	4.42249	9.75687e-06	0.000125132	2.67543	7.97841	6.27205	15.8935	7.40505	3.22809	6.59753	11.4573	30.3748	36.308	30.7436	29.7659	22.3791	38.3734
GPR160	135.075	0.787826	0.178225	4.4204	9.852e-06	0.000126244	82.9384	109.038	116.481	122.38	111.076	100.878	109.684	97.387	144.864	146.403	207.271	171.727	159.286	211.635
NUP160	1985.03	-0.611575	0.138391	-4.41918	9.90775e-06	0.000126851	2125.63	2138.21	2252.56	2362.58	2322.34	2406.54	2410.57	2405.21	1509.39	1879.81	1290.24	1403.58	1943.03	1340.74
TST	117.597	0.817365	0.18497	4.4189	9.92032e-06	0.000126904	119.057	102.39	100.353	77.0837	87.7213	92.8077	84.1186	94.1135	169.398	119.465	126.941	186.609	131.642	154.656
MAP2K6	93.2441	1.26573	0.286515	4.41768	9.97671e-06	0.0001275	20.0658	23.9352	39.4243	37.3498	83.1644	58.9127	83.2939	95.7502	75.937	69.1022	139.834	215.231	144.806	218.612
PRPF4B	1742.44	-0.45212	0.102347	-4.41752	9.98377e-06	0.0001275	1673.48	1932.11	2070.67	2124.97	1944.11	1954.61	1917.41	1880.63	1414.76	1693.59	1565.94	1236.43	1558.64	1426.79
KAT6A	1665.67	-0.50164	0.113613	-4.41534	1.00854e-05	0.000128688	1684.19	1861.63	2037.52	2066.96	1699.17	1748.82	2052.66	2005.03	1343.5	1553.04	1290.24	1202.09	1495.45	1279.11
SIRT3	29.7675	1.43481	0.324994	4.41489	1.01059e-05	0.000128842	28.0921	23.9352	21.5042	19.0723	11.3924	14.5264	16.4938	24.5513	52.5718	30.4518	40.6609	46.9386	34.2268	52.3273
TMC6	465.471	0.651361	0.147556	4.41432	1.01327e-05	0.000129037	345.131	311.158	370.947	367.936	350.316	355.09	385.131	454.2	601.655	480.202	678.342	670.878	500.238	645.37
ING5	143.485	-0.641411	0.145306	-4.4142	1.01383e-05	0.000129037	189.956	171.536	176.513	188.338	163.481	149.299	169.062	172.678	91.1244	124.15	97.1894	108.76	117.161	89.5378
RNASEH2A	681.206	-0.478346	0.108387	-4.41332	1.01796e-05	0.000129453	838.748	832.414	745.478	764.479	719.429	679.514	747.171	802.01	656.563	626.605	537.517	588.449	544.996	453.503
VWA7	60.2138	1.3696	0.310451	4.41165	1.02587e-05	0.00013035	29.4298	58.5083	34.0483	37.3498	38.7341	37.1231	34.6371	31.9167	84.1148	64.4173	117.024	98.4565	53.9731	123.26
PAXIP1	494.799	-0.567517	0.128654	-4.41118	1.02808e-05	0.000130521	540.438	543.862	601.221	573.757	558.227	531.021	597.077	603.145	415.901	487.229	316.361	400.695	409.405	348.849
SSFA2	365.935	0.982081	0.22266	4.41068	1.03047e-05	0.000130714	255.504	257.969	230.274	228.867	269.43	313.932	230.089	223.417	639.039	349.025	590.078	517.469	363.331	654.673
LOC100847374	56.1357	1.00125	0.227019	4.41043	1.03163e-05	0.000130751	38.7938	47.8705	43.9044	33.3764	42.7214	41.9652	45.358	34.3719	82.9466	62.0749	66.4458	98.4565	59.2387	88.375
KIF18B	646.538	-0.742574	0.168377	-4.41019	1.03281e-05	0.000130791	777.213	731.354	801.926	793.883	777.53	739.233	799.126	802.01	516.372	571.557	342.146	453.358	581.856	363.966
POLD3	1466.98	-0.569508	0.129177	-4.40876	1.03966e-05	0.000131548	1736.36	1821.74	1700.62	1675.97	1773.22	1769	1656.81	1694.86	1010.55	1302.4	909.415	1068.14	1404.62	1013.99
HMGA1	3464.66	-0.702185	0.159285	-4.40837	1.04152e-05	0.000131673	4548.24	4545.03	3630.62	3553.8	4468.09	4690.42	3889.25	3894.66	2310.82	3062.75	2099.49	2366.39	3171.25	2274.49
LRP10	1803.31	0.789708	0.179198	4.40689	1.04865e-05	0.000132459	1278.86	1116.98	1103.88	1052.15	1632.53	1684.26	1407.75	1615.48	2251.24	1533.13	2351.39	3267.38	1923.28	3028.01
OIP5	315.286	-0.786963	0.178584	-4.40668	1.04969e-05	0.000132459	367.872	386.953	446.212	421.974	315.569	334.108	366.163	381.364	234.821	329.114	221.155	174.016	267.233	167.447
CWC15	1104.88	-0.384037	0.0871517	-4.40654	1.05037e-05	0.000132459	1155.79	1160.86	1147.79	1211.88	1279.93	1262.18	1226.32	1234.11	912.412	1104.46	894.539	957.089	1055.77	865.145
NEDD4L	7820.25	0.680332	0.154414	4.40591	1.05342e-05	0.000132733	6089.29	6245.77	5849.13	5669.23	6663.97	6958.16	5810.78	5725.37	12123	8020.54	10091.8	12241.8	7891.92	10102.7
ARL6IP4	439.666	-0.409165	0.0928944	-4.40463	1.05965e-05	0.000133407	492.28	460.088	473.988	490.316	490.442	482.6	483.269	533.582	356.32	425.154	343.138	386.957	388.343	348.849
CXCL5	418.914	2.20649	0.501075	4.4035	1.06518e-05	0.00013399	137.785	102.39	232.962	220.92	99.6833	117.018	86.5926	102.297	1150.74	520.024	1690.9	514.035	168.501	720.954
XDH	1277.88	1.28386	0.291822	4.39947	1.08515e-05	0.000136389	842.762	941.452	638.853	612.696	991.137	978.112	649.032	675.162	1940.48	1144.29	2461.47	2334.34	1137.38	2543.11
PNRC1	381.344	0.815377	0.185615	4.39284	1.11881e-05	0.000140503	347.806	297.861	335.107	293.236	258.607	229.195	246.583	319.986	461.463	503.626	654.541	372.074	409.405	609.322
LIPH	71.5247	2.71751	0.618694	4.39233	1.12143e-05	0.000140714	2.67543	0	4.48004	1.58935	35.3164	28.2458	43.7087	50.7394	11.6826	3.51367	40.6609	168.292	109.263	501.179
KAT7	1357.95	-0.318074	0.0724272	-4.39165	1.12496e-05	0.000140881	1476.84	1594.35	1608.33	1618.76	1368.79	1436.5	1474.55	1406.79	1199.8	1296.55	1107.76	1111.64	1226.9	1083.76
ARRDC4	64.8906	1.39036	0.316601	4.39153	1.12555e-05	0.000140881	48.1578	62.4976	41.2163	34.1711	31.8987	39.5441	24.7408	30.28	99.3022	84.3281	163.635	58.387	76.3521	113.957
PNISR	574.865	-0.648442	0.147646	-4.39186	1.12383e-05	0.000140881	573.88	606.359	686.342	747.791	668.733	622.215	715.008	668.615	393.704	557.503	526.608	354.901	505.504	420.944
NUCB1	986.991	0.678748	0.154603	4.39026	1.13217e-05	0.000141518	704.977	647.581	706.054	681.833	1005.95	858.673	878.297	825.743	1153.07	885.445	1186.11	1776.8	1068.93	1438.42
SRSF1	6855.62	-0.574654	0.130895	-4.39019	1.13252e-05	0.000141518	7796.21	7898.63	7939.52	8484.77	7853.34	8114.62	8003.63	7560.18	5004.83	6724	4717.65	4642.34	6410.95	4828.07
EXOSC8	359.973	-0.673023	0.153318	-4.38971	1.13504e-05	0.000141715	464.188	410.888	373.635	410.053	494.999	473.723	409.872	395.277	269.868	286.95	213.222	265.604	342.268	229.077
SHC1	2665.26	0.291084	0.0663168	4.3893	1.13718e-05	0.000141866	2496.18	2368.26	2551.83	2561.24	2341.7	2343.6	2507.06	2433.86	2980.23	2788.68	3113.04	3124.28	2690.76	3012.89
RBM10	2387.74	-0.45183	0.102952	-4.38872	1.1402e-05	0.000142125	2864.05	2708.67	2665.62	2680.45	2670.94	2597.81	2677.77	2733.38	1850.53	2355.33	1765.28	1855.79	2215.53	1787.27
MSRB2	62.6822	1.85023	0.421641	4.38817	1.14309e-05	0.000142367	33.4429	21.2758	29.5682	30.9924	37.5948	25.8247	30.5136	26.1881	160.052	65.5886	91.239	199.203	53.9731	72.0954
TMEM127	479.587	0.458026	0.104396	4.38741	1.1471e-05	0.000142749	470.876	413.548	428.291	410.848	399.872	372.845	402.45	390.366	637.871	522.366	653.549	580.436	473.91	556.995
HSPD1	12096.2	-0.328102	0.074837	-4.38422	1.164e-05	0.000144513	12864.8	14423.6	12587.1	12694.2	13626.4	14490.9	12442.9	12308.4	10853.1	11034.1	10433	9991.05	10678.8	10917.8
TINAGL1	935.385	1.86991	0.426485	4.38447	1.16269e-05	0.000144513	656.819	642.262	305.538	278.932	613.48	559.267	282.045	315.076	1570.14	962.746	2055.85	1757.33	1000.48	2095.42
TMEM173	410.653	0.478699	0.109187	4.3842	1.16414e-05	0.000144513	318.377	324.455	329.731	323.434	334.936	322.002	405.748	376.454	474.314	518.852	517.682	430.461	533.149	539.553
CTCF	1636.35	-0.556987	0.127108	-4.382	1.17594e-05	0.00014579	1987.85	2014.55	2011.54	1997.82	1780.63	1800.47	1813.5	1892.91	1203.31	1533.13	1155.36	1079.59	1542.84	1095.39
FAM120A	4303.17	-0.279331	0.0637463	-4.38192	1.17637e-05	0.00014579	4397.07	4531.74	4408.36	4606.74	4803.6	5172.21	4449.21	4372.59	3993.12	4089.91	3802.29	3859.27	3846.57	3911.76
NEU1	455.926	0.732203	0.167128	4.3811	1.18081e-05	0.000146138	429.407	327.115	361.987	357.605	344.05	312.318	367.812	338.808	614.506	507.14	725.945	645.692	413.355	637.23
TMEM164	558.996	0.3555	0.0811451	4.38105	1.18111e-05	0.000146138	506.995	493.332	516.996	529.255	491.012	509.232	528.627	455.018	608.664	640.66	640.657	582.725	683.22	639.556
RUNDC3A	11.131	2.64226	0.603281	4.37981	1.18781e-05	0.000146847	2.67543	9.30815	2.68802	3.17871	4.55695	2.42107	4.12346	0.818378	17.5239	17.5684	33.7188	16.0278	14.4806	26.7451
TDP1	318.964	-0.520784	0.118924	-4.37915	1.19145e-05	0.000147176	381.249	370.996	351.235	402.107	380.505	351.055	344.721	337.172	279.214	292.806	233.056	254.155	279.08	208.146
INHBA	84.819	1.63328	0.372989	4.37889	1.19286e-05	0.00014723	16.0526	7.97841	5.37604	12.7148	96.8352	89.5796	53.605	42.5557	64.2544	44.5065	95.2059	280.487	132.958	245.357
SNRNP200	6543.57	-0.27684	0.0632385	-4.37771	1.19932e-05	0.000147907	7469.81	7760.33	6968.25	6811.97	7205.68	7245.46	6783.09	6757.35	5855.33	5986.13	5436.66	5957.76	5838.31	5533.9
DUPD1	8.45709	2.6342	0.601806	4.37716	1.20236e-05	0.00014816	0	1.32974	0	0.794677	3.41771	4.03512	4.94815	1.63676	16.3557	7.02735	13.8842	33.2005	13.1642	18.6053
WDR77	1718.05	-0.421218	0.0962367	-4.37689	1.20384e-05	0.000148222	1989.18	2035.82	1835.02	2003.38	1917.34	1990.12	1919.06	1924.83	1404.25	1514.39	1175.2	1352.06	1645.52	1346.56
EXOSC10	926.369	-0.387007	0.0884437	-4.37574	1.21021e-05	0.000148763	1086.23	1094.37	939.016	1042.62	1047.53	995.06	976.435	983.69	920.59	806.973	779.499	820.853	783.268	693.046
ITM2C	436.657	0.707118	0.161593	4.37591	1.20927e-05	0.000148763	351.82	337.753	304.642	343.301	388.48	355.897	319.156	310.984	671.75	453.264	593.054	649.126	430.468	603.508
ABHD4	600.862	0.793367	0.181318	4.37556	1.21121e-05	0.000148764	569.867	567.797	448.004	452.171	455.126	450.319	408.222	393.64	929.936	643.002	875.696	900.992	526.567	790.724
RND3	1801.47	0.77776	0.177786	4.37469	1.21605e-05	0.000149238	1487.54	1531.85	1324.3	1366.05	1551.07	1567.24	1269.2	1167.01	2557.32	1749.81	2507.09	2848.37	1738.99	2554.74
ERCC8	173.732	-0.579946	0.132574	-4.37451	1.21706e-05	0.000149241	169.89	186.163	198.018	190.723	194.24	215.475	191.328	223.417	146.033	168.656	134.875	147.685	144.806	120.934
PKMYT1	230.336	-0.740905	0.169416	-4.37329	1.22387e-05	0.000149954	287.609	292.542	259.842	298.004	295.063	286.493	260.603	287.251	148.369	188.567	112.065	174.016	204.045	130.237
PEAK1	1565.87	0.58754	0.13445	4.36993	1.24284e-05	0.000152154	1269.49	1372.29	1600.27	1579.02	958.099	1112.08	1205.7	1208.74	1963.85	2122.26	2478.33	1402.43	1749.52	1900.06
VPS13B	1589.56	0.511168	0.117023	4.36808	1.25341e-05	0.000153324	1185.22	1195.43	1619.98	1524.19	1186.52	1278.32	1338.47	1396.97	1899.59	1998.11	2073.7	1700.09	1954.88	1902.39
KCNK12	251.199	0.854427	0.195652	4.36707	1.25922e-05	0.00015391	175.241	152.92	238.338	193.107	149.81	168.668	233.388	242.24	310.758	249.471	328.262	323.991	393.608	356.989
PAX6	577.012	-0.395936	0.0907011	-4.36529	1.26957e-05	0.000155049	638.091	591.732	612.869	650.841	658.479	630.285	646.558	635.061	545.578	484.887	518.674	556.394	483.125	425.595
TUBA1B	25809.6	-0.472303	0.108241	-4.36344	1.28031e-05	0.000156235	30621.7	30058.7	29018.1	28876.2	30083.9	28763.9	29000.3	28591.7	22521.7	23574.4	17272.9	21736	23186	18028.5
UBC	2503.66	0.370714	0.0849656	4.36311	1.28227e-05	0.000156347	2096.2	2158.16	2050.06	2057.42	2362.21	2346.82	2267.08	2239.08	2618.07	2677.42	3243.94	3215.86	2692.07	3026.84
TMEM136	79.3782	-1.088	0.24938	-4.36283	1.2839e-05	0.00015642	88.2893	78.4544	107.521	122.38	99.1137	92.8077	112.983	119.483	64.2544	43.3353	33.7188	64.1112	39.4925	45.3503
SPTAN1	9694.7	0.536883	0.1231	4.36136	1.29254e-05	0.00015722	8008.91	8104.74	8801.48	8430.73	7554.86	7685.28	8513.29	8629.8	12112.5	9635.66	13015.4	12531.5	9555.87	13145.8
SBK1	336.639	1.09349	0.25072	4.36141	1.29226e-05	0.00015722	283.596	337.753	230.274	175.624	262.025	259.054	160.815	183.317	540.905	358.395	535.533	526.628	346.217	512.808
MCM3AP	2121.35	-0.290195	0.0665453	-4.36086	1.29552e-05	0.000157455	2409.23	2378.9	2284.82	2253.7	2276.77	2287.1	2262.13	2192.43	2016.42	2007.48	1795.03	1859.23	1982.52	1693.08
ASGR2	353.625	0.760959	0.174583	4.35872	1.30827e-05	0.000158876	295.635	269.936	257.154	251.913	280.253	260.669	247.408	293.798	491.838	380.648	547.434	470.531	329.104	574.438
GMEB2	381.751	-0.401292	0.0920715	-4.35848	1.30966e-05	0.000158917	395.964	440.142	459.652	429.126	420.948	426.108	430.489	433.74	338.796	310.374	288.593	352.612	313.307	304.661
HDAC9	58.6182	1.22312	0.280682	4.35768	1.31446e-05	0.000159371	34.7806	33.2434	38.5283	30.9924	27.3417	36.316	30.5136	37.6454	146.033	77.3008	99.1728	93.8772	50.0238	84.8865
CLUH	2472.72	-0.248141	0.0569608	-4.35635	1.32247e-05	0.000160214	2900.17	2831.01	2698.77	2748.79	2627.65	2540.51	2586.23	2489.51	2174.13	2399.84	2148.08	2100.79	2265.55	2107.05
LOC101906607	40.9953	-1.10156	0.252915	-4.35544	1.32799e-05	0.000160754	46.8201	42.5515	47.4884	48.4753	55.253	44.3863	55.2543	62.1967	26.87	32.7943	35.7022	21.752	27.6447	26.7451
SART1	1609.41	-0.367752	0.084507	-4.35173	1.35064e-05	0.000163365	1874.14	1861.63	1770.51	1745.91	1789.74	1676.19	1747.52	1711.23	1519.91	1540.16	1267.43	1388.69	1437.53	1201.2
BCL10	994.014	0.630232	0.14495	4.34792	1.37436e-05	0.000166101	743.771	699.441	791.174	772.426	882.34	925.656	947.571	858.479	890.215	980.315	1231.73	1373.81	1091.31	1727.96
FRK	109.824	1.30646	0.30051	4.34747	1.37715e-05	0.000166304	48.1578	47.8705	65.4085	55.6274	58.6707	70.211	64.326	66.2886	220.801	97.2116	262.808	161.423	110.579	208.146
AAAS	1079.32	-0.422323	0.0971928	-4.34521	1.39141e-05	0.000167893	1248.09	1323.09	1189	1130.83	1203.6	1221.83	1182.61	1169.46	971.994	995.541	798.341	887.254	989.945	798.864
GOLGA2	1064.87	0.441418	0.101606	4.3444	1.39655e-05	0.000168026	914.998	930.815	1014.28	1010.83	848.163	840.111	940.973	959.139	1146.06	1209.87	1440.98	1148.28	1146.6	1357.02
KLHL23	124.47	-0.746993	0.171931	-4.34472	1.39453e-05	0.000168026	141.798	136.963	137.089	127.148	178.291	173.51	158.341	138.306	92.2927	100.725	68.4293	117.919	86.8835	84.8865
ABHD16A	795.019	0.829761	0.190988	4.34457	1.39548e-05	0.000168026	541.775	498.651	576.133	549.122	629.999	580.25	639.136	676.799	724.322	1003.74	1342.8	850.619	1111.06	1405.86
FUBP1	3198.36	-0.441361	0.101595	-4.34434	1.39697e-05	0.000168026	3313.52	3478.59	3636	3700.02	3624.49	3553.32	3726.78	3716.25	2372.74	3066.26	2511.06	2374.41	3059.35	2644.27
ADPGK	1445.45	0.234826	0.0540592	4.34388	1.39988e-05	0.000168242	1147.76	1152.88	1130.76	1186.45	1502.65	1457.48	1615.57	1576.2	1348.17	1352.76	1337.84	1840.91	1840.35	1746.57
PRRC2B	2353.6	0.365637	0.0841828	4.34337	1.40313e-05	0.000168417	2201.88	2183.43	2162.96	2163.91	2028.98	1919.91	2018.85	2091.77	3047.99	2484.17	2861.14	2870.12	2332.69	2582.64
INTS9	497.623	-0.431823	0.0994227	-4.3433	1.40357e-05	0.000168417	523.047	543.862	618.245	624.616	567.91	511.653	572.336	527.854	440.435	432.182	390.741	413.288	433.101	367.454
LOC100847818	285.584	-0.721391	0.166266	-4.33877	1.4328e-05	0.000171789	309.013	321.796	332.419	382.24	376.518	359.125	336.474	302.8	175.239	264.697	210.246	169.437	259.334	198.844
CCT8	7234.95	-0.395321	0.091138	-4.33761	1.4404e-05	0.000172562	8078.47	8648.6	7709.25	8033.39	8192.26	8275.22	7824.67	7835.15	6139.21	6732.2	5497.15	6008.14	6907.24	5408.32
HP1BP3	1799.06	-0.420958	0.0970608	-4.33706	1.44403e-05	0.00017286	1898.22	1983.96	2021.39	2039.94	2034.11	1990.93	1985.03	2000.93	1578.32	1788.46	1374.54	1405.87	1715.29	1369.81
ARID5B	2692.61	-0.393496	0.0907348	-4.33677	1.44594e-05	0.000172952	2200.54	2264.54	2370.84	2151.19	3812.46	3613.85	3439.79	3225.23	1892.58	2350.65	2326.59	2485.45	2759.21	2803.58
DOK6	560.074	0.50837	0.117231	4.33647	1.44789e-05	0.000173047	453.486	468.067	495.492	487.137	451.138	554.425	447.808	455.018	674.087	753.097	565.285	681.182	738.51	616.299
MCU	1248.05	0.559869	0.129121	4.336	1.45099e-05	0.000173184	1048.77	1081.07	1047.43	1160.23	931.897	1014.43	1042.41	1067.98	1327.15	1471.06	1797.01	1250.17	1438.84	1794.25
SCARB2	3873.9	0.647749	0.14939	4.33595	1.45132e-05	0.000173184	2553.7	2616.92	3299.1	3299.5	3021.83	3031.18	3511.54	3352.08	4111.11	4441.28	5820.45	4500.38	4650.9	6024.62
ANXA4	2051.01	0.737938	0.17021	4.33546	1.45456e-05	0.000173433	1463.46	1397.55	1736.46	1667.23	1446.26	1499.45	1673.3	1723.5	2496.57	2224.15	3455.18	2500.34	2115.48	3315.23
PRMT5	2124.29	-0.523207	0.120737	-4.33345	1.4679e-05	0.000174885	2608.55	2628.89	2461.33	2493.7	2417.46	2372.65	2389.96	2260.36	1823.66	1932.52	1422.14	1677.2	1907.49	1344.23
YBEY	377.228	0.441148	0.101844	4.3316	1.48032e-05	0.000176226	350.482	353.71	314.499	308.335	342.341	351.862	284.519	339.627	456.79	390.018	445.286	449.923	444.949	448.852
GGT1	5.14908	4.50272	1.03983	4.33023	1.48951e-05	0.00017718	0	0	3.58403	2.38403	0	0	0	2.45513	7.00957	9.36979	8.92556	14.883	11.8477	11.6283
HNRNPM	8494.8	-0.409499	0.0946288	-4.32743	1.50862e-05	0.000179313	10237.5	9850.68	9103.43	9041.84	10184.2	9781.12	9074.08	8919.5	7146.26	7801.52	6349.05	6957.21	7973.53	6507.19
DZIP1	6.20341	4.12533	0.953363	4.32714	1.5106e-05	0.000179406	2.67543	1.32974	0.896007	1.58935	0.569619	0	1.64938	0.818378	18.6922	8.19857	11.9007	19.4623	3.94925	15.1168
DAPK2	6.37857	4.72897	1.09367	4.32397	1.53247e-05	0.00018186	0	1.32974	1.79201	0.794677	0	0.807023	1.64938	0	4.67305	9.36979	23.8015	11.4484	9.21491	24.4194
RCAN2	1037.31	1.28987	0.298338	4.32351	1.53564e-05	0.000182093	454.824	410.888	935.432	835.206	414.113	433.372	826.341	816.741	1633.23	1444.12	1753.38	1611.94	1328.26	1624.47
ZWINT	449.631	-0.631206	0.146032	-4.32239	1.54349e-05	0.000182881	472.214	522.586	534.02	567.4	544.556	525.372	541.822	524.58	334.123	386.504	304.461	311.397	450.214	275.591
GALNT11	435.164	0.362246	0.0838213	4.32165	1.54868e-05	0.000183223	398.64	364.347	409.475	392.571	407.847	433.372	402.45	391.185	394.872	454.435	467.104	517.469	521.301	537.227
ERCC6L	684.026	-0.862644	0.199611	-4.32163	1.5488e-05	0.000183223	757.148	828.425	809.99	847.921	822.53	884.498	875.823	871.573	449.781	651.201	351.072	393.826	647.677	384.896
LOC532875	1007.21	-0.337006	0.0780106	-4.32	1.56031e-05	0.00018444	1145.09	1118.31	1047.43	1113.34	1085.12	1108.85	1081.17	1151.46	904.234	949.863	767.598	890.688	901.745	836.074
AMOT	1838.07	0.413007	0.0956171	4.31938	1.56467e-05	0.00018481	2018.61	2043.8	1744.53	1784.84	1312.4	1328.36	1346.72	1353.6	2838.88	2180.82	2448.58	1769.93	1675.8	1886.11
CHMP4C	1054.76	0.364433	0.084383	4.3188	1.56881e-05	0.000185154	973.858	993.312	965.896	963.149	950.124	947.445	911.284	840.474	1181.11	1171.22	1343.79	1073.86	1145.28	1305.86
IP6K2	193.415	0.545214	0.126253	4.31843	1.57147e-05	0.000185315	187.28	159.568	195.33	195.491	133.291	150.106	147.62	138.306	262.859	238.93	278.676	232.403	185.615	202.332
MRPL51	1620.86	-0.391426	0.0906443	-4.31826	1.57263e-05	0.000185315	1839.36	1932.11	1835.92	1725.24	1866.07	1781.91	1759.89	1677.67	1280.41	1598.72	1339.83	1305.12	1492.82	1257.02
ZBTB9	299.289	-0.47945	0.111033	-4.31807	1.57402e-05	0.000185334	366.534	351.05	291.202	298.004	349.176	359.932	329.877	319.167	269.868	277.58	246.94	250.721	236.955	243.031
FSTL3	4474.05	0.297502	0.0689173	4.3168	1.58305e-05	0.000186253	4723.48	4437.33	4445.99	4446.22	3708.79	3926.98	3809.25	3843.1	5587.79	5010.5	4606.58	4898.78	4761.48	4430.38
PTBP2	178.801	-0.698596	0.161857	-4.31614	1.58779e-05	0.000186664	195.307	200.79	213.25	193.107	221.012	198.528	199.575	226.691	117.994	193.252	151.734	106.47	144.806	140.702
ELL	300.9	0.462515	0.107194	4.31474	1.59792e-05	0.000187709	264.868	252.65	231.17	225.688	274.556	261.476	297.714	285.614	310.758	285.779	366.94	388.102	367.28	400.013
ATP13A2	241.824	0.793291	0.183864	4.31456	1.59923e-05	0.000187717	200.658	184.833	203.394	199.464	179.43	154.141	168.237	217.689	365.666	248.3	330.246	366.35	226.424	340.709
LMNB2	3207.17	-0.740857	0.171726	-4.31419	1.60188e-05	0.000187882	3677.38	3733.9	4131.49	4249.93	3621.64	3440.34	4078.93	4007.6	2397.27	2977.25	1785.11	2306.86	2767.11	1725.64
ITPR1	1234.58	0.87391	0.2026	4.31348	1.60706e-05	0.000188342	704.977	692.792	1062.66	1176.92	730.251	736.005	1084.47	1072.89	1647.25	1578.81	1818.83	1545.54	1595.5	1837.27
RNF38	709.89	-0.447709	0.103801	-4.31315	1.60947e-05	0.00018848	723.705	799.171	875.399	886.86	714.302	780.392	809.847	767.639	613.337	701.563	576.194	533.497	623.981	532.576
CYP2C87	7.15573	4.13406	0.958562	4.31277	1.61221e-05	0.000188654	1.33772	0	1.79201	1.58935	1.13924	0	0	2.45513	14.0191	8.19857	21.818	19.4623	3.94925	24.4194
NPHP4	244.027	-0.562071	0.130374	-4.31122	1.62356e-05	0.000189834	304.999	312.488	317.187	363.167	248.923	217.896	219.368	253.697	250.008	220.19	231.073	186.609	150.071	140.702
STK38	614.935	0.493679	0.114516	4.31102	1.62502e-05	0.000189859	502.981	533.224	565.381	571.373	471.644	449.512	546.771	517.215	738.341	751.926	866.771	635.388	641.095	817.469
GTPBP6	480.808	-0.483808	0.112236	-4.31064	1.62784e-05	0.00019004	573.88	609.019	541.188	541.175	512.087	551.197	562.44	532.764	406.555	431.011	312.394	402.985	408.089	346.523
ENC1	3252.59	0.584051	0.13552	4.30971	1.6347e-05	0.000190694	3166.38	3208.65	3504.28	3427.44	1827.34	1779.49	2482.32	2502.6	4743.14	4320.65	4916.99	2771.67	3291.04	3594.3
GINS2	582.933	-0.679291	0.157727	-4.30675	1.6567e-05	0.000193111	675.547	601.04	525.956	540.38	865.821	865.936	733.976	711.989	398.377	439.209	314.378	605.622	480.492	402.339
PAX8	2446.33	0.321356	0.0746225	4.30642	1.6592e-05	0.000193253	2458.72	2240.6	2701.46	2547.74	1920.19	1909.42	2078.22	2045.13	2748.92	2997.16	3150.72	2487.74	2439.32	2523.34
NUB1	1006.05	0.399423	0.0928056	4.30386	1.67845e-05	0.000195345	604.648	522.586	513.412	508.593	1332.91	1167.76	1226.32	1329.86	609.832	589.126	676.359	1567.29	1583.65	1852.39
ATP8B1	4205.58	0.810438	0.188335	4.30317	1.68372e-05	0.000195807	2104.23	2099.65	1914.77	1967.62	4607.08	5064.07	3175.89	3265.33	5208.11	3767.83	4510.38	8618.38	5351.23	7223.49
USP10	2196.17	-0.336246	0.0781597	-4.30204	1.69231e-05	0.000196655	2371.77	2579.69	2328.72	2496.08	2337.15	2543.74	2294.29	2203.89	1973.19	2123.43	1919.99	1682.92	1999.64	1891.92
SERINC3	680.658	0.643977	0.149708	4.30156	1.69603e-05	0.000196936	528.398	507.959	537.604	522.103	545.695	618.987	527.803	518.852	941.619	655.886	1034.37	936.482	706.916	946.543
RIN2	1036.84	0.392126	0.0912065	4.29932	1.71324e-05	0.000198781	920.349	876.295	1069.83	1103.81	837.909	821.55	839.536	826.562	1332.99	1241.5	1373.54	1179.19	1022.86	1069.8
EXOSC9	489.435	-0.341701	0.0795109	-4.29754	1.72703e-05	0.000200227	568.53	581.094	519.684	571.373	530.315	506.811	500.588	495.119	467.305	438.038	467.104	391.536	423.886	390.711
DDX56	676.02	-0.429735	0.10004	-4.29564	1.74193e-05	0.000201799	746.446	804.49	650.501	677.86	806.011	769.093	729.852	729.175	662.404	647.687	551.401	604.477	527.883	556.995
STEAP1	284.272	0.643009	0.149695	4.29546	1.74335e-05	0.000201809	298.311	289.882	213.25	246.35	228.987	225.967	199.575	185.772	406.555	354.881	346.113	349.177	269.865	365.128
GALNT15	26.4738	1.91248	0.445373	4.2941	1.75405e-05	0.000202827	9.36402	17.2866	9.85608	11.9202	12.5316	8.07023	17.3185	4.09189	71.2639	40.9928	48.5947	53.8076	43.4417	22.0938
KIF5C	47.9567	1.15024	0.267882	4.29383	1.75618e-05	0.000202827	20.0658	17.2866	12.5441	11.9202	68.3543	54.0706	37.1111	35.1903	24.5335	31.6231	31.7353	122.498	107.946	96.5148
H1FX	3266.54	-0.849015	0.197724	-4.29394	1.75529e-05	0.000202827	4049.27	3769.8	4825.89	4445.42	3355.06	3320.09	4293.34	4448.7	1896.09	2985.45	1921.97	1858.08	2805.28	1757.03
CCAR2	2470.69	-0.363615	0.0847012	-4.29292	1.76339e-05	0.000203505	2809.21	2747.23	2660.25	2738.46	2789.42	2705.95	2686.02	2634.36	2364.56	2176.13	1972.55	2336.63	2133.91	1834.94
BABAM1	538.907	-0.479227	0.111692	-4.2906	1.78194e-05	0.000205488	659.494	652.9	546.564	559.453	635.125	637.548	595.427	587.595	446.276	493.085	407.6	437.33	500.238	386.059
TFCP2L1	47.86	1.21825	0.283996	4.28967	1.78938e-05	0.000206188	54.8464	34.5731	42.1123	33.3764	23.3544	26.6318	25.5654	17.1859	63.0861	79.6432	108.098	50.3731	46.0746	65.1184
CIZ1	582.114	-0.32066	0.0747727	-4.28847	1.79912e-05	0.000206995	684.911	730.025	670.213	650.841	623.733	575.408	618.519	584.322	532.727	514.167	519.666	479.689	500.238	465.132
TXNIP	281.601	1.84704	0.430688	4.28859	1.79814e-05	0.000206995	144.473	110.368	48.3844	41.3232	235.822	238.072	115.457	123.575	233.652	223.704	502.806	662.864	410.722	851.191
CBX5	10678.8	-0.552214	0.128808	-4.28711	1.81014e-05	0.000208104	11369.3	11998.2	13864.8	13698.6	10576.7	11328.2	12913.8	13198	8233.91	9946.04	7814.82	7473.54	9630.9	7456.06
RAB13	1600.52	0.530742	0.123859	4.28504	1.8271e-05	0.000209894	1482.19	1406.86	1266.06	1343	1470.76	1410.68	1294.77	1305.31	1786.27	1622.15	2080.65	1998.9	1615.24	2324.5
NADK	2507.22	-0.254168	0.0593227	-4.28449	1.83159e-05	0.00021025	2758.37	2710	2723.86	2666.94	2635.06	2658.33	2656.33	2730.93	2175.3	2485.34	2181.8	2124.83	2359.02	2234.96
CCDC167	423.91	-0.447552	0.104514	-4.28224	1.85023e-05	0.000212228	498.968	486.683	434.563	448.993	502.404	502.776	459.353	468.112	407.723	345.511	315.37	369.784	371.229	323.267
VPS28	1043.83	0.335129	0.0783291	4.27847	1.88182e-05	0.000215524	1009.98	994.642	914.823	932.951	873.226	874.006	970.662	995.966	1237.19	1150.14	1151.4	1257.04	1099.21	1152.36
ZSCAN31	10.9508	2.2638	0.5291	4.27859	1.88079e-05	0.000215524	4.01315	10.6379	6.27205	2.38403	2.84809	7.26321	2.47408	3.27351	23.3652	18.7396	15.8677	20.6072	15.797	19.7681
CMC2	753.097	-0.375915	0.0879052	-4.27637	1.89965e-05	0.000217401	845.437	893.582	756.23	747.791	884.049	855.445	812.321	820.015	682.265	674.625	619.83	651.416	700.333	600.02
INTS13	1163.6	-0.348337	0.0814939	-4.2744	1.91656e-05	0.00021917	1258.79	1335.05	1294.73	1287.38	1271.96	1304.15	1257.65	1217.75	1002.37	1136.09	945.117	957.089	1107.11	915.147
ZFYVE21	205.348	0.660089	0.15457	4.27049	1.95045e-05	0.000222807	165.877	148.93	171.137	172.445	154.367	138.001	166.588	186.59	232.484	238.93	335.204	236.983	254.068	273.265
CLK2	793.407	-0.600228	0.140556	-4.27039	1.95131e-05	0.000222807	904.297	812.468	989.192	937.719	985.441	808.637	1045.71	989.419	485.997	678.139	574.211	565.553	752.99	577.926
EIF4A1	17758.5	-0.354337	0.0829806	-4.27012	1.95366e-05	0.000222906	20637	20787.7	18191.6	18759.1	21214.3	20328.9	18757.6	18678.7	15647.7	15642.9	13637.3	16546.4	15427.1	14363.3
HNRNPA1	26705.6	-0.496803	0.116353	-4.2698	1.95652e-05	0.000223064	30406.3	31141.1	29965.2	31214.9	30067.3	30164.1	30714	30415	20288	26190.9	18805.2	19841.3	25372.6	19292.5
CLCA2	8.21456	2.77832	0.650784	4.26919	1.96188e-05	0.000223507	2.67543	0	2.68802	2.38403	1.70886	0.807023	2.47408	3.27351	29.2065	14.0547	13.8842	14.883	11.8477	15.1168
MAP1LC3B	906.802	0.583191	0.136679	4.26687	1.98238e-05	0.000225672	733.069	727.365	707.846	747.791	738.796	784.427	772.736	753.726	1113.35	873.733	1318.01	1142.55	939.921	1341.9
SOD3	1651.71	1.07742	0.252548	4.26621	1.98825e-05	0.000226169	953.792	929.485	1513.36	1319.16	779.808	810.251	1344.25	1438.71	1919.45	2286.23	2910.72	1894.72	2137.86	2886.14
PCDH18	1489.02	0.636333	0.149177	4.26563	1.99335e-05	0.000226578	1662.78	1687.43	1579.66	1574.26	752.467	866.743	848.608	873.209	2636.77	1780.26	2692.54	1410.45	1033.39	1447.72
ORAI1	253.774	0.626291	0.146875	4.26412	2.00692e-05	0.000227949	187.28	175.525	196.226	210.589	214.746	246.142	216.069	190.682	266.364	297.491	348.097	297.659	300.143	405.827
PLA2G4F	36.3578	2.21146	0.518685	4.26359	2.01166e-05	0.000228316	16.0526	10.6379	17.9201	9.53613	8.54428	12.9124	11.5457	22.9146	29.2065	60.9037	116.032	29.7659	61.8716	101.166
CILP	32.8906	1.53676	0.360511	4.26274	2.01939e-05	0.000229021	16.0526	13.2974	29.5682	24.635	14.8101	8.87726	14.8445	25.3697	61.9179	66.7598	45.6195	53.8076	50.0238	34.8849
WIPI2	815.213	0.498681	0.117015	4.26169	2.02889e-05	0.000229926	727.718	652.9	808.198	752.559	604.366	603.653	707.585	752.089	861.009	1023.65	1093.88	866.646	991.262	967.474
PI4KA	1521.17	0.421489	0.098983	4.2582	2.0608e-05	0.000233367	1314.98	1305.8	1354.76	1286.58	1285.63	1341.27	1282.4	1390.42	1894.92	1526.11	1993.37	1905.02	1553.37	1861.69
TCOF1	1639.37	-0.584274	0.137231	-4.2576	2.06635e-05	0.00023382	2065.43	2110.29	1969.42	1928.68	1925.31	1768.19	1782.98	1759.51	1397.24	1567.1	1055.2	1252.46	1400.67	968.637
KATNB1	720.949	0.307468	0.0722395	4.25623	2.07904e-05	0.00023508	787.915	763.268	724.87	702.495	599.239	564.109	578.934	620.331	839.98	842.11	875.696	688.051	741.142	765.142
NUP35	809.816	-0.677412	0.159176	-4.25573	2.08365e-05	0.000235248	858.814	852.36	930.951	963.943	931.897	986.99	1064.68	978.78	550.251	789.405	569.252	503.731	801.698	554.669
ATP8A1	163.308	0.792573	0.186233	4.25583	2.08278e-05	0.000235248	141.798	123.665	137.089	124.764	131.012	132.352	96.4889	117.846	205.614	168.656	285.618	194.623	189.564	237.217
SAMD12	161.925	1.30758	0.307366	4.25416	2.0984e-05	0.000236603	82.9384	74.4652	101.249	111.255	82.5947	101.685	122.879	108.026	219.633	145.232	348.097	217.52	171.134	380.245
SMC1A	1791.08	-0.713221	0.167654	-4.25411	2.09878e-05	0.000236603	2018.61	2251.24	2231.95	2295.82	1951.51	2128.12	2122.76	2189.98	1268.73	1705.3	1070.08	1069.28	1670.53	1101.2
PITPNC1	65.28	1.58877	0.373839	4.24988	2.13883e-05	0.000240938	29.4298	35.9028	32.2563	23.0456	44.9999	33.088	28.8642	21.2778	134.35	65.5886	174.544	113.339	53.9731	123.26
FOXRED2	1639.04	-0.659548	0.155203	-4.24958	2.14176e-05	0.000241088	2046.71	2192.73	1766.03	1895.31	1964.05	1994.15	1905.86	1868.36	1340	1399.61	901.481	1352.06	1358.54	961.66
KBTBD11	101.367	-1.06713	0.251131	-4.2493	2.14442e-05	0.000241207	92.3025	101.06	159.489	131.122	111.076	112.176	137.724	151.4	67.7592	100.725	70.4127	58.387	78.985	46.5132
HSF2BP	167.586	0.738465	0.173801	4.24891	2.14812e-05	0.000241443	127.083	134.303	164.865	169.266	103.671	121.053	134.425	138.306	175.239	222.533	235.04	171.727	207.994	240.706
PSRC1	555.536	0.414786	0.0976321	4.24846	2.15242e-05	0.000241567	537.762	529.235	594.053	599.187	433.48	404.319	503.887	493.482	594.645	646.516	606.938	577.001	647.677	609.322
KCNN1	28.3887	2.1767	0.512337	4.24857	2.15137e-05	0.000241567	12.0395	11.9676	20.6082	17.4829	11.3924	11.2983	6.59753	11.4573	84.1148	25.7669	46.6112	80.139	18.4298	39.5362
CCPG1	949.123	0.62072	0.146137	4.24753	2.1614e-05	0.000242394	702.301	752.63	774.15	796.267	740.505	760.216	758.716	788.916	1125.04	1050.59	1524.29	1020.06	1034.7	1459.35
PTGES3	12832.5	-0.437878	0.103098	-4.24721	2.16451e-05	0.000242563	13691.5	14415.7	13766.3	14565.6	14536.7	15565.1	14701.8	14090.8	9309.88	12213.5	10189	9306.43	12021.5	11281.8
PDE4D	181.768	0.592136	0.139498	4.24475	2.18835e-05	0.000245053	149.824	139.622	170.241	153.373	154.936	142.843	151.743	133.396	265.195	186.225	238.015	236.983	201.412	220.938
CUL7	1487.43	0.349534	0.0823514	4.24442	2.19162e-05	0.000245237	1333.7	1271.23	1364.62	1416.91	1233.79	1267.83	1376.41	1453.44	1750.06	1548.36	1717.67	1838.62	1625.77	1625.64
NUCKS1	7251.82	-0.408074	0.0961658	-4.24344	2.2012e-05	0.000246127	8002.22	8177.87	8324.8	8433.91	7947.32	8181.6	8108.37	7665.75	5871.68	7218.25	5558.64	5530.74	6811.14	5693.21
PARP6	304.157	-0.490972	0.115775	-4.24075	2.22772e-05	0.000248908	327.741	307.169	361.987	383.034	358.29	332.494	335.65	336.353	234.821	288.121	262.808	226.679	275.131	227.915
TNFAIP1	1026.07	0.628248	0.148156	4.24043	2.23087e-05	0.000249075	813.332	855.02	753.542	731.898	923.922	939.375	846.134	816.741	1185.79	1041.22	1371.56	1407.01	1018.91	1660.52
ZNF219	133.882	0.787791	0.185891	4.23792	2.25599e-05	0.000251693	111.03	119.676	112.001	115.228	93.9871	95.2288	96.4889	106.389	155.379	144.061	219.172	186.609	123.743	195.355
IDS	1613.72	0.888956	0.20981	4.23697	2.26559e-05	0.000252578	1090.24	1163.52	1168.39	1189.63	1215.57	1198.43	1110.86	1088.44	3066.69	1542.5	2351.39	2761.36	1491.5	2153.56
GMNN	409.247	-0.746205	0.176165	-4.23583	2.27705e-05	0.000253669	470.876	494.661	565.381	541.97	476.201	427.722	529.452	491.845	253.513	364.251	250.907	233.548	379.128	250.008
STBD1	191.934	1.45559	0.343687	4.23524	2.28311e-05	0.000254156	148.487	138.292	61.8245	74.6997	150.379	163.826	83.2939	80.201	327.113	202.622	272.725	436.185	236.955	310.475
TBC1D10A	153.85	0.702741	0.165974	4.23403	2.29535e-05	0.000255331	177.916	123.665	151.425	131.122	121.329	113.79	96.4889	108.026	206.782	163.971	222.147	200.348	156.654	180.239
CARMIL3	64.8855	-1.11614	0.263665	-4.23319	2.30397e-05	0.000255724	98.991	98.4004	68.9926	74.6997	88.2909	79.8953	74.2223	79.3827	43.2257	56.2188	33.7188	38.9247	51.3402	22.0938
PRKAG2	1042.37	0.409451	0.0967211	4.23331	2.30275e-05	0.000255724	1022.02	910.869	889.735	923.415	849.871	836.076	879.946	871.573	1366.87	1187.62	1433.05	1072.72	1041.29	1308.18
RNASEH1	552.107	-0.332157	0.0784607	-4.23343	2.30159e-05	0.000255724	636.753	610.348	620.037	601.571	600.948	556.846	629.24	594.142	489.502	520.024	452.228	492.283	458.113	467.457
BBS2	823.899	-0.373932	0.0883795	-4.23099	2.32667e-05	0.000258054	916.336	976.026	871.815	934.54	947.846	939.375	882.42	887.122	660.068	763.638	635.698	698.354	780.635	640.719
ACER2	83.5438	1.07786	0.254876	4.22895	2.34784e-05	0.00026021	60.1973	33.2434	52.8644	42.1179	51.2657	56.4916	45.358	43.374	136.687	149.917	187.437	91.5875	73.7193	145.354
C18H19orf54	196.404	-0.697415	0.165005	-4.22663	2.37216e-05	0.000262713	243.464	223.396	227.586	235.224	197.658	196.914	256.479	243.058	161.22	196.766	153.718	137.381	169.818	106.98
GNS	2848.9	0.3961	0.0937362	4.22569	2.38207e-05	0.000263617	2418.59	2509.21	2566.16	2504.82	2448.79	2625.25	2549.95	2421.58	3349.41	2947.97	3631.71	3254.79	2893.48	3762.92
CLTB	555.374	0.552987	0.130874	4.22534	2.38577e-05	0.000263833	567.192	507.959	450.692	454.555	444.303	423.687	456.879	488.572	623.852	584.441	779.499	651.416	580.54	761.653
CACNB3	371.231	1.12975	0.267663	4.22078	2.43455e-05	0.00026903	337.105	276.585	279.554	259.065	228.987	246.949	232.563	231.601	689.274	319.744	554.376	661.719	284.346	595.369
DHRS12	86.9137	0.859179	0.203586	4.22022	2.44061e-05	0.000269502	62.8727	63.8273	73.4726	50.0647	63.2277	62.1408	61.8519	67.107	133.182	119.465	115.041	149.974	82.9342	111.632
ADAM8	67.572	-0.903825	0.214232	-4.21891	2.45489e-05	0.000270881	96.3156	70.476	98.5608	80.2624	86.0125	82.3164	82.4692	78.5643	53.74	45.6777	39.6691	56.0973	42.1253	33.722
LOC112449111	50.3818	-1.20228	0.284996	-4.2186	2.4582e-05	0.000271048	62.8727	42.5515	57.3445	63.5742	50.1265	60.5267	80.8198	54.0129	54.9083	60.9037	37.6857	26.3314	31.594	22.0938
COG2	634.087	-0.347511	0.0824337	-4.21564	2.4907e-05	0.000274431	698.288	650.24	658.565	688.985	710.315	666.601	706.761	705.442	584.131	630.119	530.575	524.338	604.235	518.622
FBLIM1	1614.28	0.663758	0.157539	4.21329	2.51673e-05	0.000277098	1412.63	1317.77	1169.29	1157.84	1490.69	1450.22	1166.11	1147.37	2432.32	1734.58	1877.34	2531.25	1781.11	1931.46
RBM8A	2402.66	-0.213944	0.0508032	-4.21123	2.53979e-05	0.000279433	2465.41	2517.19	2496.28	2527.87	2583.22	2502.58	2648.91	2659.73	2215.02	2261.63	2038.99	2308	2237.91	2174.49
NPR1	8.94628	3.25737	0.773589	4.21073	2.54549e-05	0.000279855	0	2.65947	6.27205	3.17871	1.13924	2.42107	1.64938	0.818378	10.5144	30.4518	23.8015	18.3175	6.58208	17.4424
RFC3	911.277	-0.577507	0.137171	-4.21013	2.55225e-05	0.000280395	1171.84	1198.09	972.168	986.989	1084.55	1022.5	990.455	976.325	789.745	893.644	621.814	644.547	801.698	603.508
PSMC1	2526.14	-0.385978	0.0916861	-4.20978	2.55624e-05	0.000280629	3155.67	3123.55	2550.04	2628.79	2968.28	2894.79	2694.27	2638.45	2227.87	2124.6	1932.88	2175.2	2115.48	2136.12
MND1	328.179	-0.866016	0.205724	-4.20961	2.55816e-05	0.000280636	393.289	405.569	394.243	378.266	459.682	445.477	392.553	370.725	237.157	284.607	144.792	217.52	296.194	174.424
LOC783508	50.1773	1.30109	0.309206	4.20783	2.57831e-05	0.00028264	22.7412	34.5731	51.0724	43.7072	21.6455	27.4388	28.8642	25.3697	82.9466	58.5612	116.032	66.4009	48.7074	74.4211
KIAA0391	249.343	-0.442897	0.105277	-4.20695	2.5884e-05	0.000283541	283.596	265.947	285.826	293.236	270.569	278.423	268.849	259.426	224.306	251.813	214.213	212.941	201.412	180.239
CDC42	9045.51	0.205332	0.0488375	4.20439	2.61784e-05	0.000286557	8055.73	8171.22	8446.66	8668.34	8545.42	8708.59	8778.02	8664.17	9131.13	9361.6	10107.7	9881.14	9721.73	10395.7
EEF1G	10922.5	-0.21697	0.0516138	-4.20371	2.62573e-05	0.000287214	12499.6	12507.5	11494	11077	11575.2	11780.9	11633.1	11523.6	9883.49	9537.28	9390.68	10242.9	9836.26	9932.89
NXF1	508.465	-0.432714	0.103057	-4.1988	2.68334e-05	0.000293302	654.143	624.976	543.876	596.803	568.48	530.214	535.225	549.132	456.79	448.579	396.691	455.648	406.773	351.174
LOC511937	5334	0.488844	0.11644	4.19823	2.69004e-05	0.000293821	4055.96	4116.86	4649.38	4840.38	4539.29	4443.47	4927.53	4710.58	5573.78	5947.48	7274.33	5852.44	6138.45	7606.07
KPNB1	11573.3	-0.345878	0.0823931	-4.1979	2.69407e-05	0.000294049	12589.3	12871.8	12726	12987.4	12418.8	12918	12778.6	12580.9	10051.7	11148.9	9034.65	9425.5	11240.9	9253.79
RFC4	367.691	-0.751758	0.179208	-4.1949	2.72993e-05	0.000297605	502.981	501.31	389.763	393.365	485.315	476.951	402.45	390.366	295.57	310.374	216.197	286.211	301.459	195.355
SLC7A1	1533.92	-0.277662	0.0661914	-4.19484	2.7306e-05	0.000297605	1578.51	1727.33	1784.85	1809.48	1516.33	1607.59	1636.19	1585.2	1479.02	1472.23	1353.71	1333.74	1334.85	1255.86
CCDC91	816.468	0.483346	0.11525	4.1939	2.74205e-05	0.000298638	672.872	702.1	669.317	728.719	714.872	795.725	676.247	639.153	987.181	873.733	1009.58	1006.32	817.495	1137.25
CHEK1	581.75	-0.690718	0.164731	-4.19299	2.75296e-05	0.00029961	640.766	707.419	726.662	783.552	645.378	618.18	717.482	690.711	373.844	573.9	423.468	333.149	523.934	386.059
LOC281376	78.4235	5.73189	1.36712	4.19267	2.75693e-05	0.000299826	1.33772	3.98921	0.896007	0	3.41771	8.07023	0	0	157.715	37.4792	425.452	149.974	22.3791	287.219
TMEM250	723.244	-0.421603	0.100607	-4.19061	2.78209e-05	0.000302345	813.332	813.798	730.246	669.118	901.137	920.007	819.744	823.288	568.943	586.783	537.517	689.196	687.169	565.135
LOC781339	2138.47	-0.309295	0.0738144	-4.19018	2.78736e-05	0.000302699	2308.9	2604.95	2292.88	2267.21	2226.64	2525.18	2276.15	2246.45	1863.38	1945.4	1767.26	1798.55	1966.73	1848.9
NCAPH	1140.19	-0.668913	0.159679	-4.1891	2.80064e-05	0.000303923	1314.98	1299.15	1337.74	1354.13	1511.2	1334.01	1401.15	1419.07	709.135	988.513	618.839	851.763	1113.69	709.326
LRR1	140.165	-0.809741	0.193444	-4.18591	2.84022e-05	0.000307851	167.215	184.833	155.905	170.061	156.076	188.843	162.464	152.218	129.677	127.663	84.2969	98.4565	117.161	67.4441
HIST1H2BB	296.485	0.951103	0.227218	4.18586	2.84091e-05	0.000307851	246.14	218.077	209.666	186.749	202.784	221.124	192.978	208.686	432.257	299.833	536.525	352.612	281.713	561.646
MRPL47	418.738	-0.429771	0.102687	-4.18525	2.84847e-05	0.000308448	432.083	495.991	480.26	509.388	443.164	472.916	462.652	484.48	355.151	368.936	318.345	306.818	394.925	337.22
LYPD6B	71.7522	0.841447	0.201119	4.18383	2.86638e-05	0.000310165	65.5481	77.1246	62.7205	68.3422	43.291	40.3512	52.7803	47.4659	101.639	114.78	84.2969	69.8354	76.3521	100.003
TSPAN31	689.65	0.499423	0.119398	4.18284	2.87891e-05	0.000311298	559.166	534.554	620.933	614.285	556.518	610.11	625.116	619.512	828.297	673.454	860.82	942.206	704.283	905.844
AARS	3809.1	-0.292133	0.0698463	-4.18251	2.88315e-05	0.000311533	4470.65	4420.04	4055.33	3971.8	4225.43	4081.12	4041.81	4116.44	3537.5	3131.85	3191.38	3629.15	3209.42	3245.46
RAB7B	277.404	1.20564	0.288285	4.1821	2.88835e-05	0.000311872	169.89	179.514	123.649	125.559	199.367	252.598	150.919	147.308	475.482	255.327	506.773	532.352	267.233	497.691
PLOD1	1222.03	0.934905	0.223567	4.18176	2.89265e-05	0.000312112	881.555	843.052	989.192	895.601	847.023	839.304	870.05	914.947	1119.19	1645.57	2285.93	1136.83	1599.45	2240.77
DNAJB2	308.668	0.604782	0.144642	4.18123	2.89939e-05	0.000312616	300.986	273.925	275.97	313.897	229.556	222.738	211.946	234.056	429.92	337.313	468.096	377.798	267.233	377.919
LOC112445390	247.798	0.573945	0.137276	4.18096	2.90285e-05	0.000312766	144.473	171.536	145.153	152.578	243.797	223.545	242.459	217.689	289.729	240.101	361.981	323.991	333.053	379.082
POP1	878.245	-0.396079	0.0947538	-4.18008	2.91406e-05	0.00031375	1004.63	1055.81	1028.62	1022.75	942.719	932.919	926.953	940.316	771.053	871.391	662.475	639.967	791.166	704.674
SLC9A5	33.0994	-1.70293	0.40752	-4.17875	2.9311e-05	0.000315135	77.5876	49.2002	60.0325	47.6806	41.0126	46.8074	30.5136	28.6432	15.1874	23.4245	8.92556	11.4484	17.1134	5.81415
MLH1	280.696	-0.623864	0.149293	-4.17879	2.93067e-05	0.000315135	367.872	352.38	318.979	308.335	339.493	330.073	325.753	292.161	231.316	248.3	186.445	212.941	254.068	161.633
DDX5	10217.6	-0.172101	0.0411864	-4.17859	2.93323e-05	0.00031514	9949.94	10717.7	10536.1	10740.1	11006.7	10827.8	10809.2	10417.1	9883.49	9994.06	9495.8	9412.9	9657.23	9597.99
LOC100295842	26.4573	3.74268	0.895892	4.17761	2.94594e-05	0.00031628	5.35087	0	4.48004	6.35742	0	0.807023	5.77284	11.4573	37.3844	29.2806	92.2307	33.2005	28.9612	115.12
TNS1	3199.27	0.620821	0.148614	4.17742	2.94832e-05	0.000316311	2926.92	2792.44	3798.17	3682.53	1740.19	1654.4	2295.94	2307.01	4459.25	5003.47	4907.07	2795.71	3396.35	3030.33
SYN2	96.1193	0.940293	0.22512	4.17686	2.95562e-05	0.000316464	74.9121	85.103	64.5125	76.289	73.4808	71.0181	57.7284	65.4702	163.557	93.6979	134.875	157.988	92.1491	134.888
HDGFL2	781.043	-0.536345	0.12841	-4.17683	2.95604e-05	0.000316464	1059.47	974.696	823.431	872.556	936.453	857.866	844.484	820.015	630.861	764.809	559.335	613.636	659.525	517.459
GPX3	88.0144	4.04363	0.968107	4.17685	2.95577e-05	0.000316464	6.68858	0	13.4401	8.74145	6.26581	6.45619	15.6691	18.0043	40.8892	114.78	429.418	69.8354	86.8835	415.13
LOC782776	5178.59	-0.258635	0.061937	-4.17578	2.96966e-05	0.000317697	5619.75	6091.52	5377.84	5371.22	5462.08	5837.2	5400.91	5357.1	4873.99	4488.13	4795.01	4657.22	4420.53	4747.83
PRKD3	2058.35	-0.437438	0.10481	-4.17364	2.99766e-05	0.000320465	2120.28	2370.92	2470.29	2454.76	2116.7	2353.28	2352.02	2216.99	1781.6	1979.37	1592.72	1524.93	1936.45	1546.56
XK	125.438	0.840589	0.201551	4.17061	3.03789e-05	0.000324537	112.368	101.06	86.9127	69.9316	95.1264	100.878	90.7161	81.8378	148.369	162.8	211.238	143.105	144.806	206.984
BAP1	1386.51	-0.365301	0.0876009	-4.17006	3.04513e-05	0.000325079	1602.58	1486.64	1572.49	1581.41	1492.4	1459.91	1588.36	1604.84	1157.75	1261.41	1023.46	1178.04	1320.37	1081.43
ITM2B	3457.5	0.675392	0.161986	4.16945	3.05335e-05	0.000325727	2409.23	2356.29	2943.38	2898.19	2467.02	2467.88	3078.57	3247.32	4010.64	3706.92	5334.51	4269.12	3851.83	5364.13
CDC20	2116.85	-0.65207	0.156421	-4.16869	3.06358e-05	0.000326587	2789.14	2619.58	2582.29	2412.64	2537.08	2332.3	2518.61	2397.85	1647.25	1916.12	1210.9	1615.37	1861.41	1195.39
RELT	98.7564	-0.719442	0.172594	-4.16841	3.06734e-05	0.000326757	147.149	128.984	116.481	114.434	114.493	117.825	111.333	110.481	78.2735	73.7871	62.4789	81.2839	69.7701	55.8158
TEX264	926.25	0.623458	0.149597	4.16759	3.07834e-05	0.000327697	816.007	748.641	873.607	776.4	673.859	681.935	785.106	753.726	1247.7	986.171	1283.3	1352.06	831.975	1157.01
IL1RL2	335.46	0.550173	0.13207	4.16576	3.10322e-05	0.000330113	240.789	315.147	267.01	269.396	251.202	292.949	271.324	269.246	429.92	385.333	515.699	404.13	343.585	440.712
LOC104973848	7.71741	3.097	0.743557	4.16511	3.11201e-05	0.000330815	1.33772	1.32974	4.48004	1.58935	2.27848	0.807023	0.824692	1.63676	10.5144	16.3971	29.7519	11.4484	10.5313	15.1168
SEPHS1	1127.07	-0.415051	0.0996642	-4.16449	3.12044e-05	0.000331361	1221.34	1255.27	1275.91	1326.32	1289.05	1150.01	1293.12	1234.11	979.003	1116.18	842.969	941.061	1016.27	838.4
KIF1C	2182.77	0.466906	0.112118	4.16441	3.12154e-05	0.000331361	1854.08	1800.46	2109.2	2175.83	1688.92	1655.2	1969.36	1959.2	2458.02	2522.82	2829.4	2285.11	2360.33	2890.79
GCNT3	15.0535	3.44866	0.828464	4.16272	3.1448e-05	0.000333596	2.67543	3.98921	1.79201	0.794677	3.41771	0.807023	4.12346	3.27351	8.17783	31.6231	54.5451	6.86906	22.3791	66.2813
PLB1	24.793	1.71475	0.411979	4.16223	3.15156e-05	0.000334079	16.0526	11.9676	21.5042	8.74145	11.962	19.3686	6.59753	14.7308	39.7209	26.9382	40.6609	51.518	25.0119	52.3273
PRMT1	4418.27	-0.615694	0.147947	-4.1616	3.16032e-05	0.000334772	5923.41	5693.93	4645.8	4748.2	5794.73	5400.6	4804.65	4681.12	3546.84	3825.22	2666.76	3460.86	3833.4	2830.33
PRPF3	1483.09	-0.315619	0.075857	-4.16071	3.17265e-05	0.000335843	1662.78	1615.63	1723.92	1668.03	1649.05	1549.48	1551.25	1572.92	1300.27	1423.04	1231.73	1239.87	1412.51	1162.83
CBR4	1018.51	0.286461	0.0688605	4.16002	3.18224e-05	0.000336622	897.608	904.22	922.887	855.867	987.719	974.077	930.252	946.045	1195.13	1050.59	1084.95	1221.55	1084.73	1203.53
GPR89A	448.491	-0.408221	0.098179	-4.15792	3.21152e-05	0.000339481	506.995	555.829	491.012	552.301	473.353	504.39	498.938	449.29	408.892	372.449	377.849	329.715	346.217	411.642
TMCO4	207.889	0.566486	0.136249	4.15774	3.21417e-05	0.000339523	185.943	154.249	165.761	167.677	173.164	171.896	180.607	197.229	251.176	219.019	243.965	303.383	207.994	288.382
KNTC1	1155.97	-0.740383	0.178081	-4.15756	3.21661e-05	0.000339543	1292.23	1377.61	1601.16	1566.31	1238.92	1270.25	1317.03	1413.34	855.167	1160.68	736.854	657.14	1038.65	658.161
PSMA5	2733.06	-0.271981	0.0654438	-4.15594	3.23947e-05	0.000341717	3096.81	3054.4	2787.48	2827.46	3096.45	3070.72	3014.25	3000.17	2148.43	2442	2155.03	2480.88	2663.11	2425.66
EPHB4	1456.99	0.305783	0.0735801	4.15578	3.24177e-05	0.000341721	1652.08	1570.42	1434.51	1432.01	1140.38	1114.5	1113.33	1099.08	2002.4	1823.6	1875.36	1482.57	1290.09	1367.49
AKAIN1	113.706	1.20655	0.290513	4.15318	3.27888e-05	0.000345392	140.46	103.719	84.2247	75.4943	62.6581	62.1408	43.7087	42.5557	269.868	155.773	185.453	166.002	88.1999	111.632
C20H5orf58	11.6154	4.42173	1.065	4.15186	3.29777e-05	0.000346898	0	1.32974	2.68802	0	2.27848	0	1.64938	1.63676	32.7113	25.7669	2.97519	44.6489	43.4417	3.48849
DNAJB4	408.418	1.06279	0.255979	4.15187	3.29767e-05	0.000346898	234.1	265.947	326.147	354.426	195.949	213.861	286.168	292.979	497.679	618.406	884.622	373.219	447.582	726.768
BCL2L1	1772.65	0.437755	0.105493	4.1496	3.33056e-05	0.00034986	1420.66	1554.46	1654.93	1706.97	1410.95	1434.89	1639.49	1563.1	1962.68	2003.96	2322.63	1807.71	2020.7	2314.03
TMEM132A	867.671	0.631736	0.152237	4.14968	3.32939e-05	0.00034986	834.735	707.419	723.974	661.966	719.429	686.777	711.709	702.987	1229.01	872.562	1020.49	1349.77	845.139	1081.43
PCBP2	14221.7	-0.286002	0.0689295	-4.14919	3.33655e-05	0.000350245	16115.5	16319.8	15402.4	15408	15165.5	15801.5	15238.7	15108.1	11857.9	13433.9	11532.8	12016.3	13743.4	11959.7
SFMBT1	873.052	-0.470663	0.113506	-4.14658	3.37477e-05	0.000354011	929.713	1089.05	996.36	1041.82	982.593	983.761	973.961	927.222	737.173	817.514	647.599	682.327	824.077	589.554
STOX1	13.9195	1.98908	0.479771	4.14589	3.38493e-05	0.000354829	5.35087	3.98921	7.16806	8.74145	7.97466	3.22809	5.77284	8.18378	18.6922	31.6231	17.8511	16.0278	38.1761	22.0938
OMD	12.056	2.1835	0.52677	4.14507	3.39713e-05	0.000355862	2.67543	1.32974	4.48004	5.56274	2.27848	4.84214	4.12346	7.3654	29.2065	25.7669	19.8346	24.0417	10.5313	26.7451
HTR2A	30.6872	3.33222	0.803931	4.1449	3.39959e-05	0.000355873	13.3772	9.30815	0.896007	0.794677	6.83543	8.07023	4.12346	3.27351	117.994	17.5684	78.3465	90.4426	15.797	62.7928
GABARAPL1	1482.28	0.697466	0.168303	4.1441	3.41145e-05	0.000356866	775.876	768.587	962.312	851.099	1569.87	1571.27	1426.72	1425.61	1192.79	1148.97	1770.24	2674.35	1844.3	2769.86
ZDHHC7	3152.95	0.379795	0.0916578	4.14362	3.41861e-05	0.000357368	2992.47	3009.19	2705.05	2688.39	2775.75	2789.88	2641.49	2540.25	3628.62	3771.34	4109.72	3077.34	3427.95	3983.85
MICALL2	596.361	0.740582	0.17886	4.14057	3.46441e-05	0.000361905	576.556	527.905	429.187	406.875	501.834	508.425	399.975	405.097	842.317	610.208	865.779	898.702	602.919	773.281
NUP205	2089.92	-0.422939	0.102189	-4.1388	3.49134e-05	0.000364466	2279.47	2460.01	2321.55	2307.74	2326.32	2437.21	2267.9	2271	2054.97	1824.77	1502.47	1800.84	1871.94	1532.61
H4	20.227	2.95132	0.713131	4.13854	3.49526e-05	0.000364623	10.7017	10.6379	2.68802	3.17871	3.98733	8.87726	3.29877	4.91027	44.3939	11.7122	57.5203	46.9386	9.21491	65.1184
PLA2G4B	35.4084	-1.30411	0.315307	-4.13599	3.53424e-05	0.000368435	52.171	39.8921	46.5924	57.2168	50.1265	54.8776	40.4099	31.9167	28.0383	18.7396	21.818	16.0278	15.797	22.0938
MYH6	76.2224	1.01278	0.244908	4.13535	3.54413e-05	0.000369211	48.1578	43.8813	48.3844	55.6274	77.4682	41.1582	58.5531	62.1967	57.2448	108.924	101.156	114.484	118.477	131.4
KIF18A	468.319	-0.558945	0.135193	-4.13444	3.55824e-05	0.000369936	429.407	466.737	515.204	506.209	570.758	564.916	676.247	639.153	310.758	347.854	279.667	365.205	513.402	370.942
TUBB	18513.6	-0.406583	0.0983374	-4.13457	3.55624e-05	0.000369936	20649	20404.8	21766.7	21305.3	19538.5	19509	21328.2	21695.2	16462	17007.3	13087.8	16135.4	16596.1	13705.1
ZBTB2	316.294	-0.534882	0.129373	-4.13442	3.55845e-05	0.000369936	382.587	329.774	383.491	419.59	332.088	325.23	357.091	350.266	258.186	332.628	249.916	206.072	259.334	241.868
JAG1	1475.18	1.08749	0.263045	4.13423	3.56148e-05	0.000369996	1214.65	1022.57	869.127	893.217	964.934	877.234	684.494	710.352	1875.06	2778.14	3601.96	979.986	1867.99	2312.87
TFDP1	1345.17	-0.383557	0.0927901	-4.13359	3.57137e-05	0.000370769	1488.88	1519.89	1496.33	1558.36	1512.91	1518.82	1448.16	1412.52	1147.23	1318.8	1019.5	1052.11	1269.03	1069.8
ATP13A3	5885.84	0.688859	0.166681	4.13281	3.58356e-05	0.000371014	3178.41	3369.55	4932.52	4760.91	4288.09	5033.4	4983.61	5141.87	7312.15	7157.35	8734.15	6776.33	7357.45	9375.89
SLC1A3	21.4674	2.812	0.680396	4.1329	3.5822e-05	0.000371014	0	1.32974	5.37604	3.97339	3.41771	3.22809	17.3185	4.91027	19.8604	24.5957	66.4458	36.635	35.5432	77.9096
CEP192	877.083	-0.648653	0.156945	-4.13299	3.58072e-05	0.000371014	1082.21	974.696	1054.6	957.586	1118.16	1154.04	921.181	960.776	765.211	737.871	564.293	767.045	731.927	489.551
EI24	2302.19	0.222292	0.0537851	4.13297	3.5811e-05	0.000371014	2227.3	2357.62	2145.04	2206.02	2111.01	2169.28	2112.04	2025.49	2609.9	2422.09	2482.3	2506.06	2347.17	2509.39
CCT2	10698.7	-0.34454	0.0833774	-4.1323	3.59152e-05	0.000371583	12257.5	12657.7	11102.4	11136.6	12033.2	12845.4	11290.9	10965.4	9154.5	9994.06	8500.1	8961.83	9895.5	8986.34
RUVBL1	2724.34	-0.34901	0.0844965	-4.13046	3.62034e-05	0.00037395	3104.84	3376.2	2963.1	2879.91	3120.37	3013.43	2915.29	2851.23	2403.11	2445.52	2058.83	2480.88	2382.71	2145.42
GOLPH3L	750.673	0.407941	0.0987663	4.13037	3.62183e-05	0.00037395	644.779	698.111	722.182	641.304	604.366	616.566	671.299	655.521	856.336	904.185	961.977	753.307	800.381	979.102
LARS	2969.37	-0.295341	0.071501	-4.13059	3.61837e-05	0.00037395	3352.32	3580.98	3165.59	3158.05	3118.09	3428.24	3020.02	3121.29	2623.92	2743.01	2504.11	2419.05	2703.92	2632.65
RIT1	963.616	0.488551	0.118293	4.13002	3.62739e-05	0.000374269	774.538	787.203	863.751	916.263	788.922	785.234	869.225	851.113	1101.67	986.171	1302.14	1085.31	1036.02	1343.07
LMBR1	642.965	0.346626	0.0839447	4.12921	3.6401e-05	0.000375323	536.424	525.245	570.757	580.114	568.48	598.811	623.467	625.241	658.899	696.878	715.036	685.761	778.002	838.4
FANCD2	1305.49	-0.708413	0.171602	-4.12823	3.65559e-05	0.000376663	1452.76	1526.54	1680.01	1646.57	1363.1	1466.36	1713.71	1640.85	855.167	1259.07	833.052	772.769	1211.1	855.842
DHX40	1042.78	0.466624	0.113048	4.12767	3.66464e-05	0.000377338	957.805	993.312	839.559	820.902	912.529	979.726	766.963	881.393	1338.83	1076.36	1361.64	1284.51	1179.51	1205.85
PRR15	16.0057	2.81507	0.68206	4.12731	3.67027e-05	0.00037766	5.35087	2.65947	5.37604	3.97339	3.41771	6.45619	4.12346	0.818378	15.1874	29.2806	69.421	11.4484	22.3791	44.1875
SLBP	1344.97	-0.645286	0.156676	-4.1186	3.81189e-05	0.000391965	1594.56	1644.88	1671.05	1713.32	1515.19	1420.36	1630.42	1581.92	1121.53	1213.39	773.548	1013.19	1176.88	759.327
ZNF496	667.484	-0.369633	0.0897612	-4.11796	3.82234e-05	0.000392772	722.367	767.257	790.278	795.472	664.745	710.181	724.904	707.897	612.169	647.687	570.244	525.483	620.032	486.063
CRY2	126.509	0.559457	0.135896	4.11681	3.84155e-05	0.000394424	120.395	103.719	115.585	112.049	107.088	88.7726	119.58	110.481	139.023	141.718	141.817	149.974	159.286	161.633
WDR70	494.966	-0.322157	0.0782566	-4.11668	3.84364e-05	0.000394424	520.372	581.094	560.004	545.149	549.682	562.495	517.906	533.582	426.415	411.1	421.485	438.475	459.429	402.339
APOBR	24.0456	1.63884	0.398185	4.11578	3.85879e-05	0.00039571	17.3903	6.64868	13.4401	15.8935	6.26581	10.4913	14.8445	17.1859	42.0574	37.4792	43.6361	38.9247	22.3791	50.0017
BFSP1	28.7012	1.25298	0.304469	4.11531	3.86666e-05	0.000396247	21.4035	11.9676	25.9842	12.7148	17.6582	18.5615	24.7408	13.9124	39.7209	35.1367	46.6112	46.9386	43.4417	43.0247
MIR3064	1305.29	-0.283935	0.0690079	-4.11453	3.87977e-05	0.000397321	1305.61	1425.48	1404.04	1459.03	1463.92	1424.4	1446.51	1345.41	1239.53	1196.99	1063.13	1190.64	1155.81	1153.53
SMC4	4223.59	-0.772	0.187656	-4.1139	3.89026e-05	0.000398126	4810.43	5058.31	5316.01	5412.55	4939.17	4994.67	5278.85	4907.81	2708.03	4348.76	2517.01	2415.62	3893.96	2529.15
CDCA5	250.109	-0.584079	0.141989	-4.11355	3.89618e-05	0.000398461	304.999	296.531	310.914	302.772	293.354	274.388	286.993	275.793	202.109	235.416	150.743	178.596	223.791	165.122
CSF1	2176.53	0.991974	0.24118	4.113	3.90553e-05	0.000399147	639.429	674.176	499.972	503.031	2741.01	2723.7	1872.05	1955.92	1695.15	1129.06	2175.85	5484.94	3080.41	5296.69
TMEM183A	661.703	-0.34354	0.0835483	-4.11187	3.92468e-05	0.000400833	754.472	710.079	747.27	749.381	692.087	761.023	699.339	733.267	560.765	616.064	532.558	534.642	634.513	538.39
PLEK2	1292.58	0.26009	0.0632582	4.11155	3.93006e-05	0.00040111	1217.32	1220.7	1182.73	1106.99	1216.14	1162.92	1184.26	1239.02	1438.13	1322.31	1492.55	1489.44	1407.25	1416.33
ANO1	1622.48	0.868101	0.211188	4.11055	3.94713e-05	0.000402581	1381.86	1499.94	1064.46	1098.24	1255.44	1363.87	949.22	915.765	3012.95	1892.7	2141.14	2634.28	1715.29	1789.59
ST8SIA5	200.683	1.58259	0.385091	4.10964	3.96274e-05	0.0004039	149.824	186.163	76.1606	69.9316	137.848	138.001	63.5013	81.0194	207.951	277.58	476.03	282.776	248.803	413.967
PROB1	46.1993	1.05632	0.257115	4.10837	3.9846e-05	0.000405853	41.4692	22.6055	37.6323	36.5552	29.6202	32.2809	30.5136	27.0065	79.4418	60.9037	63.4706	65.2561	42.1253	77.9096
SCN1A	168.709	0.82956	0.20193	4.10816	3.98818e-05	0.000405945	121.732	121.006	155.009	159.73	106.519	89.5796	117.106	117.028	281.551	214.334	306.444	207.217	135.591	229.077
WDR75	1736	-0.40081	0.097571	-4.10788	3.99313e-05	0.000406174	1985.17	1994.6	1768.72	1969.21	1912.21	2052.26	1802.78	1756.24	1563.13	1749.81	1472.72	1295.96	1621.82	1359.35
TYSND1	170.396	0.606266	0.147617	4.10701	4.00807e-05	0.00040742	143.136	151.59	174.721	148.605	110.506	131.545	132.775	138.306	225.474	188.567	256.858	177.451	190.88	215.123
MAPKBP1	342.643	-0.442239	0.107686	-4.10673	4.01308e-05	0.000407655	432.083	425.515	422.019	393.365	379.936	368.003	343.896	371.544	299.075	296.32	256.858	306.818	272.498	229.077
POP4	261.068	-0.422131	0.102799	-4.10637	4.01923e-05	0.000408005	296.973	283.234	276.866	268.601	304.176	277.616	305.961	304.437	226.643	234.245	210.246	230.114	197.462	238.38
CHST11	43.1658	1.30738	0.318392	4.10619	4.02245e-05	0.000408057	20.0658	26.5947	21.5042	23.0456	27.9113	33.088	23.9161	22.0962	51.4035	53.8763	102.148	51.518	55.2895	91.8635
LEPROTL1	621.522	0.404167	0.0984487	4.10535	4.03694e-05	0.000409252	505.657	497.321	551.044	567.4	539.999	578.636	536.874	532.764	790.913	657.057	774.54	752.162	633.196	783.747
SF3A2	1111.85	-0.358042	0.0872442	-4.10391	4.06232e-05	0.000411548	1284.21	1307.13	1288.46	1210.29	1244.05	1228.29	1187.56	1198.11	993.022	931.123	849.911	1053.26	974.148	816.306
CAPNS1	9845.99	0.643792	0.156992	4.10079	4.11739e-05	0.000416726	9219.54	8547.54	7202.11	7120.31	8933.33	8529.43	7392.54	7241.83	12390.6	9809	13845.5	13841.2	9750.7	14020.2
CNTRL	561.842	-0.709552	0.173032	-4.1007	4.11895e-05	0.000416726	660.832	722.046	637.061	694.548	644.809	650.461	661.403	665.341	384.358	550.475	389.749	345.743	544.996	313.964
JUP	1474.45	0.56167	0.13701	4.09947	4.14103e-05	0.000418399	1426.01	1259.26	1499.92	1320.75	991.707	1075.76	1124.88	1315.13	1713.84	1741.61	2186.76	1503.18	1491.5	1991.93
CLEC2B	9.74522	5.16142	1.25902	4.09955	4.13949e-05	0.000418399	0	0	0	0	0	0.807023	0.824692	3.27351	3.50478	0	0.991728	75.5597	2.63283	48.8388
FIGNL1	321.606	-0.659633	0.160994	-4.09724	4.18101e-05	0.000422156	422.718	381.634	409.475	406.875	367.974	378.494	366.988	348.629	255.849	293.977	174.544	240.417	271.182	183.727
YPEL3	54.5382	1.26635	0.309087	4.09704	4.18458e-05	0.000422235	30.7675	46.5407	38.5283	25.4297	26.7721	26.6318	23.0914	40.9189	84.1148	81.9857	127.933	62.9664	51.3402	96.5148
PLEKHB2	1650.97	0.552749	0.134931	4.09655	4.19362e-05	0.000422864	1178.53	1267.24	1351.18	1398.63	1305	1425.2	1476.2	1637.57	1780.43	1678.36	2188.74	1875.25	1943.03	2608.23
LMNB1	2824.18	-0.769936	0.18797	-4.09606	4.20246e-05	0.000423472	3466.02	3394.81	3606.43	3746.9	3257.08	3173.22	3519.78	3415.91	1899.59	2679.76	1498.5	1753.9	2598.61	1527.96
EIF2S3	3451.67	-0.302757	0.0739351	-4.09491	4.2234e-05	0.000425299	3681.4	3892.13	3615.39	3700.81	3820.43	4027.85	3692.97	3627.87	2834.2	3250.15	2953.37	2798	3334.48	3094.29
LYRM1	133.331	0.527314	0.128832	4.09303	4.25774e-05	0.000428471	78.9253	78.4544	81.5367	88.2092	133.291	125.896	145.146	140.761	114.49	139.376	151.734	191.189	198.779	198.844
SIK1	1042.06	0.828774	0.202586	4.09098	4.29554e-05	0.000431987	747.784	642.262	901.383	971.89	631.707	592.355	791.704	738.995	1262.89	1645.57	1993.37	910.15	1230.85	1527.96
FAM219A	354.904	0.51134	0.125046	4.08921	4.3284e-05	0.000435002	394.626	377.645	346.755	313.897	251.772	245.335	230.089	276.612	439.266	453.264	566.277	336.584	352.8	383.734
BLM	778.207	-0.707587	0.173054	-4.08881	4.33592e-05	0.000435467	905.634	944.112	918.407	955.997	914.808	899.831	917.057	868.299	585.299	836.254	493.881	468.241	716.13	470.946
CLIC1	6582.92	0.465557	0.11388	4.08813	4.34867e-05	0.000436291	5622.42	5592.87	5018.54	5083.55	6330.17	6101.9	5615.33	5721.28	6458.15	7208.88	8790.68	7294.94	7939.31	9382.87
POLR2B	2517.55	-0.333692	0.081626	-4.08806	4.34991e-05	0.000436291	2576.44	2745.9	2870.81	2874.35	2546.77	2779.39	2805.6	2741.57	2170.63	2488.85	2172.88	2026.37	2397.19	2048.9
TIMELESS	1062.85	-0.416266	0.101841	-4.08743	4.36178e-05	0.000437192	1166.49	1273.89	1068.04	1051.36	1323.79	1342.89	1121.58	1160.46	878.533	918.24	792.391	999.448	918.859	863.982
HSPA4L	515.321	0.710602	0.173868	4.08701	4.36959e-05	0.000437394	351.82	388.283	439.044	467.27	328.1	403.512	376.884	375.636	641.376	826.884	794.375	423.592	697.701	700.023
HOXB2	150.08	0.56719	0.138777	4.08707	4.36862e-05	0.000437394	128.421	134.303	155.009	147.81	119.05	106.527	122.054	136.669	153.042	190.91	170.577	186.609	160.603	189.541
TONSL	436.713	-0.656107	0.160571	-4.08608	4.38731e-05	0.000438877	604.648	489.343	544.772	500.647	519.492	501.161	498.938	475.478	384.358	371.278	273.717	377.798	340.952	231.403
MRPS5	826.613	-0.47711	0.1168	-4.08485	4.41052e-05	0.000440906	1042.08	1011.93	932.743	936.13	926.2	949.059	911.284	905.126	575.953	799.946	591.07	623.94	754.307	612.811
SARS2	219.887	-0.519699	0.127291	-4.08276	4.45032e-05	0.00044459	255.504	220.736	256.258	218.536	258.037	258.247	269.674	263.518	170.566	183.882	173.552	200.348	205.361	144.191
CREBL2	375.929	0.898596	0.220134	4.08204	4.46422e-05	0.000445684	263.53	253.979	314.499	308.335	269.999	271.967	282.869	309.347	355.151	414.613	633.714	392.681	462.062	730.257
PLSCR3	289.325	0.870854	0.21357	4.0776	4.55033e-05	0.00045398	196.644	162.228	174.721	162.909	255.189	245.335	221.842	242.24	400.714	240.101	426.443	572.422	306.725	443.038
BTF3	5950.04	-0.209252	0.051322	-4.07723	4.55757e-05	0.000454403	6136.11	6449.22	6170.8	6242.19	6412.2	6577.24	6399.61	6124.74	5087.78	5681.61	5464.42	5282.31	5680.34	5592.05
SMDT1	840.969	0.403133	0.0989222	4.07525	4.59655e-05	0.000457986	809.319	706.089	768.774	687.396	788.353	706.145	706.761	742.269	1002.37	857.336	1079	1034.94	885.948	998.87
NUP98	5333.18	-0.426808	0.104785	-4.07318	4.6375e-05	0.000461761	5748.17	5832.22	6151.99	6030.81	5934.86	6132.57	6120.04	6048.63	4655.52	4848.87	3637.66	4751.1	4920.76	3851.29
BUD13	289.838	-0.601069	0.147578	-4.0729	4.64311e-05	0.000462016	335.767	376.315	310.914	335.354	362.278	320.388	331.526	318.349	221.97	283.436	201.321	248.431	239.588	172.099
RTCB	3333.09	-0.24693	0.0606838	-4.06912	4.71906e-05	0.000469263	3506.16	3771.13	3592.09	3665.05	3467.84	3649.36	3473.6	3560.76	2963.88	3231.41	2835.35	2854.09	3183.09	2909.4
TLE3	237.624	0.637475	0.156669	4.06892	4.72309e-05	0.000469355	262.192	239.352	268.802	273.369	129.873	112.983	183.082	156.31	325.945	338.484	358.014	193.479	248.803	236.054
PPP1R10	1677.5	-0.34295	0.084349	-4.06584	4.78589e-05	0.000475283	1622.65	1749.93	1955.98	1888.15	1790.88	1808.54	1924.01	2028.76	1404.25	1438.26	1410.24	1630.26	1449.37	1383.77
RIOK3	838.356	0.725676	0.178513	4.0651	4.80112e-05	0.000476482	733.069	793.852	659.461	629.384	671.011	669.829	533.576	505.758	1230.18	959.233	1399.33	966.248	756.939	1229.11
VIRMA	2463.41	-0.325965	0.0802092	-4.06393	4.82523e-05	0.000477932	2506.88	2670.11	2727.45	2732.89	2663.54	2843.14	2610.97	2658.91	2106.38	2436.15	2080.65	2089.34	2378.76	1982.62
SERPINB6	2004.92	0.428775	0.105502	4.06415	4.82071e-05	0.000477932	1783.18	1864.29	1559.95	1504.32	1967.46	2008.68	1735.15	1674.4	2194	2032.07	2288.91	2558.72	2211.58	2686.14
ITPRIPL2	1482.32	0.631003	0.155263	4.06408	4.82216e-05	0.000477932	1001.95	969.377	1228.43	1236.52	1127.28	1076.57	1299.71	1296.31	1700.99	1835.31	2406.92	1679.49	1638.94	2254.73
COL18A1	2378.85	0.46077	0.113439	4.06184	4.86882e-05	0.000481933	2411.9	2150.18	2092.18	1851.6	2048.35	2132.16	1891.84	2079.5	2984.91	2424.43	2824.44	3120.84	2407.73	2883.82
BAX	1299.85	0.652243	0.160597	4.06135	4.87888e-05	0.000482476	1211.97	1214.05	910.343	951.229	1231.52	1125.8	984.682	920.675	1681.13	1280.15	1661.15	1970.28	1387.5	1667.5
MDN1	1774.96	-0.302822	0.0745634	-4.06127	4.88069e-05	0.000482476	1860.76	1898.86	1909.39	1985.9	1913.35	1914.26	1899.26	1851.17	1642.58	1836.48	1526.27	1453.95	1685.01	1472.14
EXO1	722.497	-0.642274	0.158173	-4.06057	4.89532e-05	0.000483605	758.485	783.214	747.27	763.685	987.15	1045.9	891.492	921.494	443.939	559.845	361.981	508.31	789.85	552.344
LOC107131323	38.5513	1.11551	0.274755	4.06	4.90728e-05	0.00048447	37.4561	30.5839	24.1922	19.8669	25.6329	29.8599	17.3185	21.2778	61.9179	66.7598	51.5699	59.5319	46.0746	47.676
RPS6KC1	1246.05	0.310898	0.0765879	4.05936	4.9208e-05	0.000485486	937.739	993.312	975.752	1051.36	1197.34	1361.45	1232.09	1196.47	1358.69	1214.56	1290.24	1585.61	1425.68	1624.47
METTL4	181.514	-0.802898	0.197819	-4.05875	4.93361e-05	0.000486432	224.736	257.969	228.482	216.152	218.734	201.756	174.01	198.866	171.734	189.738	116.032	100.746	152.704	89.5378
MBD3	1877.64	-0.49415	0.121831	-4.05603	4.99146e-05	0.000491815	2049.38	2093	2285.71	2233.84	2048.35	2033.7	2310.79	2213.71	1417.1	1735.75	1281.31	1512.34	1782.43	1289.58
ERLIN2	974.531	0.29622	0.0730428	4.05543	5.0043e-05	0.000492759	882.893	870.977	933.639	884.476	929.618	853.831	917.882	860.934	1107.51	1028.33	1091.89	1202.09	1058.4	1020.96
TIAM1	309.849	-0.933769	0.230309	-4.05442	5.02585e-05	0.000494558	406.666	368.337	385.283	385.418	332.088	366.389	403.274	405.915	228.979	305.69	156.693	170.582	283.03	139.539
GRM7	55.3099	1.07452	0.265056	4.05393	5.03638e-05	0.000495271	33.4429	42.5515	46.5924	42.1179	31.329	35.509	36.2864	44.1924	88.7879	50.3626	92.2307	99.6014	59.2387	72.0954
CYHR1	495.394	0.471799	0.116429	4.05224	5.07286e-05	0.000498534	500.306	428.175	452.484	442.635	426.075	392.213	387.605	405.915	625.02	528.222	670.408	524.338	496.289	655.836
NBDY	743.836	0.410515	0.101363	4.04994	5.12314e-05	0.000503148	605.986	704.76	597.637	595.213	709.745	692.426	686.968	683.346	803.764	723.817	847.928	920.454	795.115	1046.55
WDHD1	1161.73	-0.543215	0.13421	-4.04749	5.17705e-05	0.000507661	1169.16	1335.05	1444.36	1362.08	1348.29	1312.22	1453.11	1396.15	824.793	1028.33	752.722	808.259	1150.55	879.099
GCA	209.627	1.67125	0.412921	4.0474	5.17906e-05	0.000507661	64.2104	57.1786	129.025	158.935	67.215	75.8602	160.815	133.396	248.84	318.573	478.013	207.217	304.092	531.413
SLC37A2	42.2656	1.65357	0.408553	4.04739	5.17919e-05	0.000507661	37.4561	23.9352	26.8802	32.5818	18.2278	10.4913	30.5136	18.8227	39.7209	87.8418	81.3217	32.0556	65.8208	86.0494
SELENOM	934.09	0.812771	0.200831	4.04703	5.18712e-05	0.000508028	794.604	744.652	634.373	642.099	810.568	740.847	695.215	679.254	1494.21	858.507	1128.59	1697.8	942.554	1213.99
MLKL	58.75	0.980456	0.242272	4.04692	5.18966e-05	0.000508028	24.0789	34.5731	40.3203	35.7605	35.886	46.8074	47.8321	57.2865	84.1148	56.2188	84.2969	100.746	71.0865	103.492
RAD50	2525.48	-0.470291	0.11622	-4.04656	5.19761e-05	0.000508476	2976.42	3219.29	2783.89	2747.2	2931.83	2961.78	2705.81	2604.08	2108.71	2427.95	1821.81	1965.7	2330.06	1772.15
PRMT9	542.671	-0.313176	0.0774063	-4.04587	5.21301e-05	0.000509653	478.903	468.067	433.667	448.993	726.834	731.97	677.897	711.17	364.498	435.695	398.675	548.38	592.387	580.252
MNT	154.627	0.727935	0.179947	4.04527	5.22629e-05	0.00051009	140.46	130.314	146.049	147.015	103.101	115.404	102.262	103.934	252.344	172.17	226.114	217.52	129.009	179.076
LOC100848122	125.758	-0.681955	0.168585	-4.04518	5.22838e-05	0.00051009	119.057	148.93	157.697	166.882	155.506	126.703	159.165	173.496	75.937	93.6979	96.1977	93.8772	93.4656	100.003
SYVN1	391.499	0.603714	0.149247	4.04506	5.231e-05	0.00051009	342.455	308.499	340.483	353.631	280.253	277.616	307.61	346.174	554.924	426.326	565.285	536.932	359.382	481.411
CHCHD3	1438.09	-0.32836	0.0811699	-4.04534	5.22482e-05	0.00051009	1482.19	1623.61	1566.22	1559.16	1511.2	1616.47	1613.1	1606.48	1189.29	1369.16	1203.96	1112.79	1359.86	1319.81
PIK3R2	534.534	0.692075	0.171164	4.04334	5.26961e-05	0.000513524	496.293	480.034	410.371	422.768	404.429	410.775	402.45	371.544	857.504	557.503	745.78	761.321	467.328	695.372
FKTN	836.575	-0.525016	0.129881	-4.04228	5.29334e-05	0.000515503	921.687	916.188	1056.39	1017.98	865.251	934.533	971.487	902.671	691.611	867.877	649.582	558.684	776.686	581.415
CCDC34	869.089	-0.622444	0.153993	-4.04202	5.29927e-05	0.000515748	1072.85	1087.72	897.799	937.719	1118.73	1018.46	1026.74	925.586	602.823	870.22	613.88	609.057	813.545	572.112
THNSL2	182.044	0.581379	0.143918	4.03965	5.35308e-05	0.000520649	139.123	135.633	160.385	160.525	141.265	141.229	143.496	174.315	252.344	196.766	232.064	258.735	198.779	213.961
PARP4	492.17	0.505043	0.125046	4.03884	5.3715e-05	0.000522105	383.925	372.326	434.563	431.51	414.683	429.336	372.761	449.29	654.226	522.366	653.549	692.63	529.199	550.018
ATP5F1C	3065.29	-0.249592	0.0618058	-4.03832	5.38349e-05	0.000522933	3334.93	3515.82	3140.51	3296.32	3358.47	3265.22	3311.14	3216.23	2580.69	2910.49	2683.62	2644.59	2940.87	2715.21
TAF3	473.316	-0.526687	0.130456	-4.03728	5.40753e-05	0.000524723	517.696	527.905	610.181	611.901	516.075	461.617	565.738	613.784	313.094	415.785	349.088	349.177	408.089	366.291
EML2	193.143	0.608069	0.150616	4.03722	5.40888e-05	0.000524723	171.228	121.006	120.961	156.551	181.139	160.598	164.114	143.216	213.792	261.183	266.775	234.693	234.322	274.428
2021-03-03	508.699	0.880591	0.218192	4.03584	5.44063e-05	0.000527465	445.46	374.985	501.764	532.434	249.493	242.107	412.346	420.646	637.871	664.084	814.209	531.207	546.313	748.862
SFPQ	7797.66	-0.444206	0.110161	-4.03234	5.52238e-05	0.000535047	8402.2	8455.79	9263.82	9466.19	8646.82	8343.81	8823.38	8343.36	6800.45	7880	5909.71	5997.83	7292.95	5540.88
PLXNA1	1560.5	0.475572	0.117982	4.03087	5.55702e-05	0.000538057	1491.55	1303.14	1392.4	1524.99	1150.63	1237.17	1365.69	1336.41	1892.58	1632.69	2215.52	1752.76	1566.54	1984.95
SEMA4B	452.186	0.521031	0.129291	4.02991	5.57973e-05	0.000539752	409.341	335.093	344.963	358.399	444.303	391.406	368.637	429.648	483.66	454.435	552.393	599.898	480.492	677.929
PGAM1	12611	-0.368523	0.0914488	-4.02983	5.58167e-05	0.000539752	15450.6	15357.1	13031.5	13126.5	14806.7	14507.9	13106	12864.1	11367.2	11042.3	9776.46	11204.6	10846	10067.8
YLPM1	2332.5	-0.288723	0.0716519	-4.02953	5.58882e-05	0.000540098	2506.88	2541.12	2757.01	2754.35	2451.07	2295.17	2469.13	2496.05	2109.88	2282.72	2027.09	2051.56	2093.1	1819.83
ARL4D	192.09	0.820981	0.203752	4.02932	5.59383e-05	0.000540236	197.982	142.282	179.201	172.445	120.19	111.369	163.289	152.218	172.903	271.724	281.651	196.913	261.967	265.125
LOC112441484	47.3282	1.2387	0.307547	4.02767	5.6333e-05	0.000543212	30.7675	27.9244	17.0241	21.4563	37.0252	37.9301	29.6889	35.1903	74.7687	48.0202	55.5368	125.933	63.188	58.1415
TOM1	658.743	0.507124	0.12591	4.02767	5.6332e-05	0.000543212	648.793	615.667	670.213	645.278	451.708	507.618	548.42	552.405	778.062	682.824	929.25	689.196	652.943	850.028
LOC104969384	51.8274	-1.17961	0.292883	-4.02758	5.63544e-05	0.000543212	73.5744	50.5299	51.0724	82.6464	68.3543	57.2987	47.8321	67.9254	50.2352	44.5065	50.5782	20.6072	39.4925	20.9309
PPFIBP2	26.3116	2.10117	0.521784	4.02688	5.65209e-05	0.000544469	26.7543	10.6379	8.06406	7.15209	11.3924	11.2983	7.42223	6.54702	33.8796	42.1641	84.2969	22.8969	34.2268	61.6299
ISG20L2	880.521	-0.279852	0.0695305	-4.02489	5.70029e-05	0.000547714	976.533	966.717	926.471	956.791	974.048	982.954	884.894	871.573	866.85	822.199	802.308	786.507	758.256	751.188
SKAP2	903.627	0.42191	0.10482	4.02507	5.69587e-05	0.000547714	735.744	744.652	737.414	793.088	763.859	808.637	757.067	821.652	1149.57	955.719	1219.83	1022.35	930.706	1210.51
PAN2	677.549	-0.546163	0.135696	-4.02491	5.69965e-05	0.000547714	820.02	864.328	755.334	752.559	864.112	769.9	743.872	763.547	551.419	544.619	440.327	593.029	612.134	410.479
STXBP5	787.073	-0.33528	0.0833014	-4.0249	5.69996e-05	0.000547714	905.634	978.685	917.511	874.145	824.239	841.725	747.995	781.551	732.5	762.467	748.755	570.132	706.916	626.765
ZAR1L	179.184	-0.575455	0.143009	-4.0239	5.72424e-05	0.000549665	232.763	203.449	230.274	241.582	219.873	169.475	201.225	172.678	146.033	161.629	144.792	125.933	115.845	143.028
TGFBRAP1	757.399	-0.331239	0.0823335	-4.02313	5.74287e-05	0.000551103	852.126	787.203	833.287	901.959	807.15	763.444	827.99	815.104	739.509	716.789	643.632	691.485	633.196	590.717
SGPL1	474.645	0.660099	0.164085	4.02289	5.74874e-05	0.000551317	377.236	390.942	381.699	370.32	399.303	402.705	354.617	364.178	682.265	459.12	661.483	678.892	439.683	682.581
MGA	2.5516	6.34918	1.57886	4.02137	5.78601e-05	0.00055391	0	0	0	0	0	0	0	0	1.16826	0	0.991728	4.57937	9.21491	19.7681
ORC2	500.548	-0.509539	0.126709	-4.02134	5.78679e-05	0.00055391	525.723	597.051	617.349	612.696	540.568	572.18	542.647	561.407	401.882	486.058	379.832	345.743	479.176	345.36
FAM174A	169.519	0.732125	0.182049	4.02158	5.78093e-05	0.00055391	85.6139	126.325	120.065	145.426	134.43	140.422	153.393	149.763	192.763	162.8	243.965	248.431	200.095	269.776
ARFGAP2	748.147	-0.27411	0.0681977	-4.01935	5.83593e-05	0.000557906	822.696	864.328	842.247	804.213	799.745	813.48	750.469	789.735	676.423	707.419	646.607	681.182	656.892	618.625
MAGED1	832.165	0.519567	0.129265	4.0194	5.83471e-05	0.000557906	734.406	672.846	781.318	731.898	635.125	669.829	719.131	784.825	846.99	905.356	1151.4	925.033	918.859	1173.29
DNAJA3	1311.77	-0.267375	0.0665327	-4.0187	5.85208e-05	0.000558742	1428.68	1465.37	1484.68	1416.91	1298.16	1325.13	1450.63	1441.16	1231.35	1228.61	1158.34	1151.71	1208.47	1075.62
HCFC1	5469.08	-0.430942	0.107231	-4.01881	5.84918e-05	0.000558742	5899.33	5760.41	6340.15	6315.3	6098.34	5840.43	6408.68	6738.52	4391.49	5078.43	3738.82	4747.67	5102.43	4107.11
FADS3	3031.06	0.465804	0.115984	4.01611	5.91663e-05	0.00056441	2953.68	3108.92	2472.08	2433.3	2632.78	2718.86	2330.58	2401.94	3772.32	3284.11	3881.63	3594.81	3026.44	3823.38
C6H4orf48	70.1506	0.714964	0.178028	4.01602	5.91892e-05	0.00056441	44.1447	53.1894	61.8245	56.4221	50.6961	52.4565	47.0074	61.3784	94.6292	104.239	96.1977	88.1529	86.8835	84.8865
TAF8	499.092	-0.363299	0.090504	-4.01417	5.96546e-05	0.000568489	506.995	561.148	509.828	590.445	532.594	519.723	564.914	538.493	508.194	457.949	440.327	440.765	425.202	390.711
TROAP	964.66	-0.715179	0.178176	-4.0139	5.97246e-05	0.000568797	1058.13	1063.79	1322.51	1388.3	1036.71	946.638	1253.53	1206.29	689.274	898.329	610.905	667.444	831.975	531.413
KLHL25	468.007	0.447332	0.111503	4.01183	6.02488e-05	0.000573427	493.617	416.207	386.179	366.346	452.277	431.757	382.657	378.909	508.194	525.88	525.616	571.277	521.301	591.88
STK17A	689.928	0.727527	0.181371	4.01127	6.0392e-05	0.000574428	557.828	647.581	430.979	428.331	635.695	661.759	438.736	443.561	957.974	798.775	949.084	892.978	851.721	963.985
SELENOT	1902.94	-0.208799	0.0520637	-4.01045	6.06024e-05	0.000576066	2006.58	1990.61	1998.99	1991.46	1977.72	2072.44	1980.91	1991.93	1769.92	1893.87	1759.33	1631.4	1777.16	1798.9
DPP9	1969.8	-0.36824	0.0918342	-4.00984	6.07607e-05	0.000577207	2390.5	2216.67	2137.87	2202.05	2233.48	2217.7	2012.25	2052.49	1928.8	1729.9	1506.44	1783.67	1645.52	1519.82
UBE2Q1	1669.32	0.308085	0.0768388	4.00949	6.08492e-05	0.000577685	1413.97	1449.41	1517.84	1654.52	1463.35	1497.84	1517.43	1579.47	1844.68	1734.58	2074.7	1895.86	1823.24	1903.55
PLEKHM2	1829.48	0.315234	0.078639	4.00862	6.10751e-05	0.000579101	1733.68	1761.9	1696.14	1637.83	1665.57	1666.5	1606.5	1659.67	1989.55	1861.08	2179.82	2065.3	1829.82	2259.38
NDUFA6	745.813	0.291909	0.0728186	4.00871	6.10507e-05	0.000579101	682.236	738.003	670.213	643.689	689.808	650.461	675.422	743.906	792.081	798.775	822.143	808.259	863.569	862.819
ANKRD29	16.2446	2.67963	0.668511	4.00835	6.11446e-05	0.000579396	5.35087	10.6379	1.79201	6.35742	3.98733	5.64916	6.59753	1.63676	31.5431	21.082	47.603	29.7659	6.58208	48.8388
TMEM190	242.851	-1.64108	0.409633	-4.00623	6.16965e-05	0.000584259	416.03	359.028	340.483	334.559	305.316	330.88	341.422	320.804	190.427	86.6706	62.4789	195.768	77.6686	38.3734
SMURF2	3724.19	0.494542	0.123472	4.00529	6.19405e-05	0.000586202	2567.08	2833.67	3317.02	3504.53	2734.17	2990.02	3298.77	3196.58	4793.38	4751.66	5241.28	3644.04	4564.02	4702.48
N6AMT1	78.8761	-0.924112	0.230732	-4.00513	6.19826e-05	0.000586232	104.342	99.7301	71.6806	73.905	118.481	122.668	110.509	94.1135	59.5813	38.6504	33.7188	45.7937	67.1372	63.9556
TMEM189	1071.16	0.699735	0.174727	4.00473	6.20884e-05	0.000586865	856.139	843.052	912.135	851.099	752.467	731.97	909.635	938.68	1078.31	1300.06	1764.28	1080.73	1303.25	1674.47
CYR61	18215.6	0.382782	0.0955971	4.00411	6.22508e-05	0.000588032	16911.4	16282.6	14781.4	14779.4	17234.4	15393.2	15583.4	14785.6	24542.8	19760.9	23359.2	22129.8	18610.2	20864.6
VKORC1	222.235	0.780545	0.195065	4.00147	6.29508e-05	0.000594272	206.008	171.536	185.473	161.319	155.506	172.703	159.165	187.409	330.618	204.964	309.419	364.06	215.892	287.219
ZNF572	314.039	-0.427444	0.106827	-4.00129	6.29988e-05	0.000594354	343.793	355.039	361.987	379.856	314.43	363.16	348.845	368.27	271.037	268.21	246.94	294.225	243.537	237.217
DDB2	103.39	-0.788096	0.197038	-3.99971	6.34198e-05	0.000597953	149.824	139.622	122.753	118.407	122.468	135.58	124.528	115.391	72.4322	67.931	60.4954	59.5319	102.68	55.8158
PSTPIP2	8.87119	3.05671	0.764433	3.99866	6.37014e-05	0.000600232	2.67543	1.32974	0	3.17871	1.70886	2.42107	1.64938	2.45513	9.34609	19.9108	28.7601	10.3036	7.8985	32.5592
ANKRD46	461.625	0.488028	0.122074	3.99781	6.39314e-05	0.000602024	378.574	390.942	418.435	402.107	402.721	353.476	389.254	402.642	521.045	548.133	626.772	463.662	506.82	658.161
PLK2	12267.3	0.440712	0.110263	3.9969	6.41769e-05	0.000603959	12690.9	13209.6	11804.9	12192.7	9062.64	9243.65	9403.96	9310.69	17948	13158.7	16033.3	13707.2	10595.8	13379.5
JOSD2	224.24	0.656343	0.164237	3.99632	6.43352e-05	0.000605072	224.736	191.482	189.954	172.445	160.633	177.545	189.679	188.227	302.58	226.046	272.725	348.032	218.525	276.753
NACC2	735.905	0.444449	0.111246	3.99518	6.46455e-05	0.00060742	517.696	534.554	660.357	636.536	635.695	657.724	729.027	720.173	709.135	891.302	813.217	982.276	945.187	869.796
MIR1282	9.28835	2.33746	0.585103	3.99496	6.47057e-05	0.00060742	8.0263	3.98921	4.48004	3.97339	3.98733	4.84214	3.29877	0.818378	22.197	10.541	13.8842	18.3175	22.3791	9.30263
ICA1	406.292	0.506654	0.12682	3.99508	6.46724e-05	0.00060742	369.21	352.38	360.195	328.202	332.657	322.809	337.299	369.907	585.299	397.045	482.972	518.614	429.152	502.342
MAPRE3	354.882	0.813862	0.203771	3.99401	6.49661e-05	0.000609486	156.513	182.174	155.905	160.525	447.72	399.477	306.785	332.261	262.859	240.101	363.964	772.769	448.898	738.397
ARL6IP5	1882.17	0.715897	0.179375	3.99106	6.57784e-05	0.000616724	832.06	851.03	1145.99	1103.81	1898.54	1789.98	1953.69	1955.92	1408.92	1746.3	2304.78	2658.33	2788.17	3912.92
SLC8A1	8.94024	2.62476	0.657723	3.99068	6.58854e-05	0.00061696	2.67543	6.64868	2.68802	3.17871	3.41771	7.26321	0	0.818378	19.8604	12.8835	11.9007	21.752	15.797	16.2796
NT5DC1	411.783	-0.452808	0.113464	-3.99075	6.58649e-05	0.00061696	438.771	497.321	468.612	422.768	496.138	528.6	435.437	425.557	362.161	330.285	324.295	362.915	368.597	303.498
GFM1	964.996	-0.3791	0.095031	-3.98923	6.62885e-05	0.00062035	1054.12	1039.85	971.272	1014.01	1173.98	1101.59	1067.98	1022.97	748.856	905.356	888.589	732.7	899.112	889.564
CYP26B1	19.5326	2.32201	0.582274	3.98783	6.66793e-05	0.000623315	4.01315	9.30815	8.96007	6.35742	4.55695	5.64916	4.12346	8.18378	38.5526	19.9108	80.33	27.4762	11.8477	44.1875
TMEM68	1061	0.309351	0.0775742	3.9878	6.66879e-05	0.000623315	896.27	997.301	920.199	944.076	960.377	1012.81	915.408	899.397	1266.4	1171.22	1349.74	1113.93	1143.97	1262.83
ATP6V0B	1136.96	0.550411	0.13803	3.98763	6.67364e-05	0.000623383	968.507	929.485	999.944	1018.78	932.466	912.743	979.734	1036.07	1421.77	1038.88	1440.98	1673.76	1128.17	1436.09
SNX25	757.37	0.442199	0.1109	3.98736	6.68125e-05	0.000623708	523.047	539.872	664.837	654.814	621.454	689.198	729.852	701.35	843.485	891.302	953.051	862.067	884.632	1044.22
MTFR2	631.12	-0.683745	0.171594	-3.98467	6.75752e-05	0.000630438	719.692	791.192	727.558	819.312	705.758	713.409	694.39	773.367	446.276	682.824	412.559	356.046	550.262	443.038
LOC101905203	539.515	-0.650845	0.163408	-3.98294	6.80674e-05	0.000634637	642.104	626.305	612.869	638.126	643.1	698.075	625.941	545.858	369.171	557.503	391.733	326.28	502.871	373.268
ACOT7	1516.93	0.452169	0.113536	3.98259	6.81682e-05	0.000635184	1356.44	1339.04	1306.38	1321.55	1295.31	1250.08	1378.88	1363.42	1621.55	1576.47	2004.28	1640.56	1617.88	2165.19
SP4	123.737	-0.896665	0.225185	-3.9819	6.83665e-05	0.00063664	165.877	168.876	183.681	192.312	120.759	121.861	122.054	132.577	91.1244	147.574	84.2969	43.504	86.8835	70.9326
GEMIN6	369.592	-0.448085	0.112554	-3.98106	6.8608e-05	0.000638101	417.368	456.099	394.243	372.704	423.227	451.933	392.553	404.279	313.094	339.655	287.601	279.342	351.483	290.707
KLF9	30.0794	1.42644	0.358298	3.98117	6.85758e-05	0.000638101	24.0789	14.6271	20.6082	11.1255	12.5316	20.9826	9.07161	18.0043	50.2352	48.0202	70.4127	30.9108	38.1761	52.3273
ANKS1A	618.431	0.48026	0.120652	3.98053	6.87618e-05	0.000639138	488.267	458.759	554.628	568.989	500.695	491.477	580.583	531.946	639.039	791.748	850.903	668.589	735.877	796.538
PRRT2	14.8597	-2.02112	0.508123	-3.97761	6.96101e-05	0.000646624	13.3772	11.9676	28.6722	25.4297	20.5063	20.1756	26.3901	24.5513	5.84131	8.19857	5.95037	4.57937	6.58208	5.81415
SLCO4A1	153.857	0.84179	0.211691	3.97651	6.99347e-05	0.00064924	127.083	147.601	159.489	179.597	78.0378	75.0532	89.0667	96.5686	175.239	279.923	291.568	120.209	156.654	177.913
DUSP1	1174.93	0.703113	0.176834	3.97613	7.00471e-05	0.000649484	1405.94	1120.97	1023.24	909.905	901.707	754.567	781.808	811.013	1472.01	1410.15	1889.24	1022.35	1301.94	1644.24
RBMX	4937.65	-0.514243	0.129332	-3.97614	7.00438e-05	0.000649484	5246.53	6382.73	5689.65	5620.75	5294.04	5648.36	5754.7	5514.23	4599.45	4513.9	3198.32	3990.92	4345.49	3328.02
MIR2422	330.386	-0.425282	0.106963	-3.97596	7.00962e-05	0.000649541	390.613	450.78	404.995	390.981	300.759	348.634	335.65	306.073	339.964	305.69	332.229	230.114	223.791	265.125
ATXN2L	2157.3	-0.30552	0.0768473	-3.97567	7.01803e-05	0.000649921	2470.76	2412.14	2643.22	2548.53	2240.31	2070.82	2297.59	2265.27	2079.51	1985.23	1802.96	1929.06	1831.14	1625.64
TRIB1	1708.76	0.47115	0.118515	3.97546	7.02448e-05	0.00065012	1395.24	1241.97	1510.67	1438.37	1495.82	1514.78	1387.96	1361.78	1954.5	2020.36	2613.2	2051.56	1736.35	2200.07
LOC112449619	4.40278	5.59741	1.40807	3.97524	7.03088e-05	0.000650314	0	1.32974	0	0	0	0.807023	0	0	2.33652	10.541	13.8842	8.0139	2.63283	22.0938
TTC31	30.1105	-1.25472	0.315671	-3.97477	7.04477e-05	0.00065111	36.1184	35.9028	25.9842	32.5818	54.6834	49.2284	36.2864	35.1903	23.3652	17.5684	18.8428	19.4623	22.3791	13.9539
PKP2	1050.16	0.368384	0.0926832	3.97466	7.04812e-05	0.00065111	1038.07	1131.6	952.456	972.685	858.985	900.638	788.405	790.553	1488.37	1198.16	1348.75	1093.33	1082.09	1058.17
TOLLIP	746.261	0.423352	0.106531	3.97397	7.06841e-05	0.000652585	612.674	609.019	715.014	758.917	570.189	598.004	710.06	678.435	857.504	833.912	936.192	871.226	826.709	869.796
PBDC1	814.759	-0.361927	0.0910843	-3.97353	7.08144e-05	0.000653389	885.568	896.241	814.471	815.339	956.39	940.182	895.615	886.303	785.072	750.755	630.739	682.327	788.533	679.092
C11H9orf16	279.004	0.846989	0.213207	3.97262	7.10865e-05	0.000655498	231.425	219.406	212.354	185.954	218.734	193.686	183.906	224.236	455.622	260.012	414.542	420.158	248.803	437.224
DDC	75.1977	0.9094	0.228929	3.97242	7.11459e-05	0.000655646	53.5087	55.8489	60.9285	58.8061	43.8607	43.5793	63.5013	62.1967	96.9657	91.3555	123.966	81.2839	85.5671	131.4
ARMCX2	20.1755	1.59702	0.402209	3.97061	7.16876e-05	0.000660235	16.0526	14.6271	12.5441	4.76806	14.2405	7.26321	10.721	8.18378	29.2065	29.2806	42.6443	34.3453	23.6955	34.8849
RNF114	1454.77	0.391086	0.09851	3.97002	7.18678e-05	0.000661491	977.871	1090.38	1147.79	1158.64	1515.76	1463.13	1449.81	1673.58	1232.52	1235.64	1422.14	1993.17	1777.16	2229.14
CENPM	562.8	-0.733423	0.185006	-3.96433	7.36033e-05	0.000677052	767.849	743.322	637.957	634.947	665.315	687.584	622.642	702.168	460.295	474.346	273.717	407.564	491.023	310.475
HGFAC	16.7968	1.66477	0.419974	3.96398	7.37112e-05	0.000677631	14.7149	10.6379	8.06406	6.35742	8.54428	7.26321	11.5457	4.09189	33.8796	26.9382	27.7684	27.4762	31.594	16.2796
CCDC50	2934.4	-0.593409	0.149771	-3.96212	7.42874e-05	0.000682364	3004.51	3316.36	3803.55	3895.51	2969.99	3304.76	3475.25	3424.91	3044.49	2340.11	1953.71	2448.82	2237.91	1861.69
ULK2	519.348	0.40293	0.101698	3.96203	7.43164e-05	0.000682364	449.473	466.737	423.811	471.244	484.176	498.74	444.509	441.924	623.852	491.914	620.822	618.215	572.641	662.813
ZNF207	3564.31	-0.240368	0.0606763	-3.96148	7.44872e-05	0.000683516	3615.85	3749.85	3911.07	4104.51	3663.79	3776.87	3897.49	3840.65	3093.56	3415.29	3195.35	3056.73	3259.45	3319.88
DPYSL4	162.232	-0.708915	0.178973	-3.96101	7.46326e-05	0.000684019	231.425	210.098	180.097	192.312	190.253	225.967	178.133	171.859	108.648	105.41	123.966	114.484	151.388	87.2122
KLRF2	7.08761	2.83183	0.714903	3.96113	7.45947e-05	0.000684019	0	0	0	0.794677	1.70886	3.22809	4.12346	0	19.8604	7.02735	14.8759	18.3175	11.8477	17.4424
JUN	3076.83	0.322204	0.0813834	3.95908	7.52387e-05	0.000689155	3379.07	3011.85	3050.9	2920.44	2637.34	2516.3	2657.98	2765.3	3066.69	3459.8	3693.2	3149.46	3196.26	3571.05
RFWD3	968.188	-0.396816	0.100238	-3.95875	7.53422e-05	0.000689685	1054.12	1054.48	1151.37	1159.43	1016.77	1038.64	1080.35	1161.28	814.278	888.959	687.268	856.343	862.253	729.094
COL5A2	4038.03	0.82631	0.208769	3.95801	7.55773e-05	0.000691418	2734.29	2699.36	3248.03	3198.58	2874.3	2674.48	3200.63	3181.04	7392.76	3920.09	5544.75	7033.92	3843.94	4986.21
SLC26A6	373.852	-0.398398	0.100662	-3.95777	7.56541e-05	0.000691576	417.368	382.964	404.995	439.456	428.353	384.95	372.761	427.193	391.368	329.114	336.196	317.122	306.725	295.359
LOC101903248	32.6734	-1.36348	0.344518	-3.95766	7.56863e-05	0.000691576	40.1315	38.5623	44.8004	42.9126	41.5822	26.6318	61.8519	52.3762	17.5239	14.0547	23.8015	17.1727	19.7462	16.2796
MCM8	217.733	-0.636742	0.160985	-3.95529	7.64404e-05	0.000698045	272.894	271.266	295.682	243.171	224.999	256.633	226.79	260.244	167.061	216.676	144.792	156.844	185.615	125.586
GLIPR1	1322.45	0.453016	0.114539	3.95512	7.6496e-05	0.00069813	996.599	1015.92	1062.66	1056.92	1268.54	1135.48	1295.59	1329.86	1590	1230.96	1370.57	1990.88	1449.37	1720.99
DUSP13	6.17455	2.87134	0.726166	3.95411	7.68213e-05	0.000700675	4.01315	3.98921	3.58403	1.58935	1.13924	3.22809	0.824692	1.63676	12.8509	8.19857	8.92556	12.5933	5.26567	18.6053
DNAJC2	1579.4	-0.446309	0.112898	-3.95319	7.71148e-05	0.000702928	1828.66	1902.85	1591.31	1753.85	1910.5	1881.98	1763.19	1616.3	1324.81	1473.4	1114.7	1341.76	1445.43	1162.83
CC2D2B	67.6123	-1.01506	0.256829	-3.9523	7.74026e-05	0.000705106	64.2104	82.4436	89.6007	91.3879	72.3416	91.1936	84.1186	103.116	38.5526	63.2461	35.7022	33.2005	57.9223	39.5362
CACNA2D1	1743.85	0.828634	0.209666	3.95217	7.74472e-05	0.000705106	1163.81	1148.89	1313.55	1342.21	1261.71	1440.54	1306.31	1248.03	1823.66	2324.88	3038.66	1500.89	2347.17	3153.59
DDX47	1612.61	-0.352642	0.0892542	-3.95099	7.78289e-05	0.000708154	1847.39	1811.1	1606.54	1745.91	1920.19	1885.21	1686.49	1637.57	1489.53	1472.23	1283.3	1385.26	1494.13	1311.67
ECSIT	392.063	-0.444577	0.112538	-3.95047	7.7999e-05	0.000709274	433.42	518.597	467.716	429.126	393.037	409.968	456.879	437.014	327.113	377.134	303.469	299.949	343.585	291.87
DHRS1	563.033	0.45327	0.114805	3.94817	7.87495e-05	0.000715668	537.762	454.769	509.828	440.251	458.543	518.109	455.23	522.125	649.553	611.379	721.978	748.728	573.958	680.255
SNX27	1415.24	-0.40671	0.10304	-3.94712	7.90968e-05	0.000718391	1630.68	1757.91	1697.93	1715.71	1485.57	1487.34	1587.53	1432.98	1154.24	1338.71	1130.57	990.29	1348.01	1055.85
SKA2	1309.04	-0.620273	0.157168	-3.94655	7.92859e-05	0.000718811	1585.19	1453.4	1616.4	1632.27	1439.43	1409.06	1632.06	1608.11	870.355	1245.01	862.804	832.301	1261.13	879.099
MTURN	1020.3	0.747413	0.189371	3.94683	7.91927e-05	0.000718811	817.345	795.182	750.854	770.042	825.378	891.761	760.366	787.28	1130.88	988.513	1657.18	1314.28	1004.43	1790.76
RPL9	9358.64	-0.341902	0.0866305	-3.94667	7.92465e-05	0.000718811	11026.8	11635.2	9220.81	9461.43	10854.7	10773.8	9811.36	9748.52	8243.25	8033.43	7837.63	8424.9	8022.24	7927.01
MYO1C	5641.52	0.366102	0.0927695	3.94636	7.93485e-05	0.000718947	5350.87	4897.41	5034.66	4980.24	4994.99	5169.79	4984.44	5105.04	6673.11	5616.02	6599.95	7126.65	5511.84	6936.28
RBM17	1097.95	-0.276689	0.0701326	-3.94523	7.97231e-05	0.000721908	1138.4	1176.82	1162.12	1189.63	1266.26	1275.9	1237.86	1153.91	866.85	992.027	854.87	1047.53	1043.92	965.148
PCCB	763.413	0.311903	0.0790856	3.94386	8.01799e-05	0.000725442	747.784	730.025	689.03	641.304	701.201	681.128	710.884	728.356	845.821	730.844	855.862	900.992	847.772	876.773
LOC618701	9.4067	2.61252	0.662441	3.94377	8.02095e-05	0.000725442	6.68858	3.98921	3.58403	4.76806	2.27848	1.61405	2.47408	3.27351	12.8509	14.0547	31.7353	5.72422	22.3791	16.2796
ZCCHC3	361.188	-0.495859	0.125822	-3.94096	8.11556e-05	0.000732779	383.925	369.666	435.459	414.027	402.151	427.722	409.047	422.283	289.729	346.682	271.734	322.846	326.471	234.891
POC1A	795.718	-0.357777	0.0907804	-3.94113	8.11003e-05	0.000732779	940.415	936.134	918.407	894.012	876.074	815.094	863.452	892.032	639.039	748.412	597.021	659.43	747.724	612.811
PSMG4	195.43	0.542766	0.137725	3.94093	8.11663e-05	0.000732779	160.526	188.822	172.033	162.909	172.025	169.475	159.165	159.584	257.018	199.108	214.213	288.501	219.842	212.798
GNPTAB	1584.74	0.389766	0.0989182	3.94029	8.13846e-05	0.00073431	1230.7	1202.08	1201.55	1247.64	1530	1551.91	1425.89	1536.91	2046.79	1562.41	1712.72	2191.23	1742.94	2003.55
ONECUT2	234.237	-0.864805	0.21951	-3.93971	8.15803e-05	0.000735636	239.451	276.585	277.762	295.62	306.455	371.231	256.479	217.689	230.148	190.91	142.809	203.782	144.806	125.586
HSPE1	2959.57	-0.324141	0.0822871	-3.93915	8.17696e-05	0.000736903	3440.61	3445.34	3030.3	3051.56	3486.64	3263.6	3203.1	3090.2	2352.88	2704.36	2546.76	2477.44	2843.46	2497.76
STIL	509.648	-0.722472	0.183417	-3.93895	8.18374e-05	0.000737074	583.245	611.678	697.99	693.753	505.252	543.127	640.785	605.6	352.815	515.339	341.155	286.211	458.113	300.01
METTL15	428.682	-0.547307	0.138954	-3.93877	8.1901e-05	0.000737207	436.096	418.867	489.22	512.567	498.986	529.407	526.978	521.307	300.243	411.1	289.585	304.528	417.304	345.36
MAK16	1680.48	-0.347544	0.0882573	-3.93785	8.2214e-05	0.000739583	1644.05	1784.5	1628.94	1782.46	1920.19	2096.65	1873.7	1868.36	1442.8	1578.81	1329.91	1433.34	1712.66	1430.28
KIF24	372.12	-0.585466	0.148684	-3.93766	8.22801e-05	0.000739737	403.99	417.537	413.059	470.449	418.1	439.828	458.529	436.195	285.056	344.34	244.957	283.921	364.647	229.077
ST3GAL3	653.873	-0.596206	0.151421	-3.93741	8.23662e-05	0.000740071	856.139	856.349	696.198	733.487	813.416	835.269	702.637	726.72	514.035	498.942	392.724	574.711	568.692	384.896
NUP93	1426.18	-0.341018	0.086633	-3.93635	8.27312e-05	0.000742908	1601.25	1696.74	1574.28	1617.17	1581.26	1538.19	1556.19	1565.56	1191.63	1322.31	1024.46	1257.04	1323	1117.48
REPS2	65.0634	1.48336	0.376865	3.93604	8.28373e-05	0.000743418	41.4692	25.265	47.4884	61.9848	27.9113	24.2107	41.2346	48.2843	137.855	51.5339	108.098	125.933	68.4536	101.166
2021-03-09	474.746	0.510455	0.129699	3.93569	8.29585e-05	0.000744063	433.42	424.186	465.924	406.08	342.911	421.266	391.729	402.642	592.309	474.346	630.739	585.015	460.746	615.137
FAM8A1	149.447	1.16635	0.296423	3.93476	8.32785e-05	0.00074649	85.6139	81.1138	108.417	104.103	79.177	87.1585	119.58	134.214	142.528	166.314	278.676	169.437	188.248	347.686
CPSF3	1180.88	-0.365103	0.0927939	-3.93456	8.33487e-05	0.000746676	1391.23	1345.69	1156.75	1278.64	1329.49	1345.31	1263.43	1296.31	1164.76	987.342	924.291	1054.4	1050.5	944.217
AKR1A1	636.361	0.60258	0.15327	3.93149	8.442e-05	0.000755824	583.245	529.235	418.435	439.456	621.454	566.53	461.827	496.755	856.336	689.851	800.325	937.627	685.853	822.12
HSPA9	9176.6	-0.251392	0.0639542	-3.9308	8.46625e-05	0.000757546	9968.67	10750.9	9780.81	9996.24	9618.02	9929.61	9432.82	9662.59	7939.5	8592.1	8450.52	7336.16	8590.93	8423.53
NATD1	518.329	0.515514	0.131153	3.93062	8.47272e-05	0.000757676	461.512	468.067	515.204	522.103	365.126	362.353	492.341	428.83	636.702	576.242	664.458	681.182	517.352	565.135
WSB2	2896.47	0.525144	0.133656	3.92906	8.52787e-05	0.000762032	2207.23	2303.1	2263.31	2146.42	2574.11	2672.05	2609.32	2571.34	2740.74	3277.09	3932.2	3023.53	3704.4	4525.73
MBLAC1	209.944	-0.450339	0.114621	-3.92896	8.53153e-05	0.000762032	238.114	242.012	238.338	225.688	256.329	234.844	239.985	228.327	164.725	187.396	154.71	180.885	190.88	156.982
CLDN1	407.352	2.53724	0.64611	3.92695	8.60284e-05	0.000767947	17.3903	5.31894	51.0724	50.0647	111.076	111.369	319.156	398.55	179.912	154.602	213.222	1093.33	1107.11	1890.76
STK38L	580.898	0.661769	0.168554	3.92616	8.63132e-05	0.000770034	440.109	452.11	405.891	406.875	525.758	503.583	453.58	495.119	731.332	534.078	838.011	807.115	583.172	955.846
CPTP	332.784	0.541364	0.13793	3.92492	8.67601e-05	0.000773564	329.078	332.434	289.41	294.825	263.734	261.476	263.077	249.605	460.295	322.087	461.154	431.606	330.421	369.78
CDS1	120.53	1.12979	0.287873	3.92461	8.68698e-05	0.000774085	56.1841	54.5191	92.2887	99.3346	62.6581	75.0532	89.0667	90.84	185.754	133.52	229.089	187.754	109.263	222.1
PLGRKT	643.794	0.380696	0.0970116	3.92423	8.70066e-05	0.000774846	583.245	586.413	570.757	543.559	578.733	585.092	588.005	566.318	775.726	627.776	746.772	801.39	647.677	811.655
CDKN3	255.899	-0.578389	0.147424	-3.9233	8.73436e-05	0.000776931	315.701	339.082	259.842	272.574	303.607	309.09	269.674	255.334	250.008	233.074	202.313	216.375	200.095	155.819
C23H6orf62	2526.38	0.314662	0.0802012	3.92341	8.73032e-05	0.000776931	2299.54	2166.14	2281.23	2368.93	2438.54	2069.21	2314.08	2298.01	2703.36	2772.29	3149.73	2778.53	2674.96	3054.75
CREBRF	72.1123	1.10546	0.282161	3.91785	8.93411e-05	0.000793764	32.1052	30.5839	38.5283	46.886	56.3923	58.9127	61.0272	68.7438	44.3939	70.2735	107.107	108.76	107.946	177.913
MID1IP1	411.38	0.528142	0.1348	3.91796	8.92999e-05	0.000793764	379.912	356.369	379.907	385.418	348.607	334.915	310.909	292.161	420.574	531.736	625.781	414.433	454.164	524.436
UTP11	850.06	-0.370699	0.0946322	-3.91726	8.95598e-05	0.000795238	1003.29	986.663	887.047	907.521	1005.95	927.27	927.778	834.746	726.659	837.425	709.086	691.485	778.002	677.929
NUP43	764.946	-0.595595	0.152094	-3.91598	9.00382e-05	0.000799016	778.551	969.377	930.055	920.236	804.872	925.656	919.531	867.481	557.261	727.33	561.318	461.372	738.51	547.693
ALDH9A1	672.743	0.584811	0.149346	3.91581	9.01029e-05	0.00079912	581.907	648.911	483.844	487.137	649.366	623.829	505.536	556.497	790.913	644.173	819.168	1010.9	726.662	889.564
MUC1	19.5947	1.32864	0.339486	3.91369	9.08956e-05	0.000805678	8.0263	6.64868	8.06406	2.38403	15.9493	16.9475	13.1951	11.4573	22.197	28.1094	32.727	36.635	28.9612	43.0247
OPLAH	325.591	0.484205	0.123743	3.913	9.11547e-05	0.0008075	298.311	287.223	278.658	254.297	278.544	269.546	273.798	255.334	455.622	360.737	417.518	438.475	314.624	375.594
ESYT1	5391.42	0.437233	0.111782	3.91149	9.17299e-05	0.000812119	4937.51	5033.05	4797.22	4775.22	4623.6	4621.02	4606.73	4718.77	7221.02	5585.57	5704.42	7495.29	5518.42	5842.05
LOC112445610	4.79467	3.27818	0.83817	3.91111	9.18721e-05	0.000812901	4.01315	0	1.79201	2.38403	1.70886	0.807023	0	1.63676	4.67305	9.36979	8.92556	6.86906	14.4806	10.4655
LOC509006	1019.53	0.29951	0.0766139	3.90934	9.2548e-05	0.000818402	927.038	857.679	940.808	953.613	952.972	891.761	1016.02	947.682	1003.54	1076.36	1192.06	1197.51	1126.85	1189.57
DEPDC7	208.694	0.460858	0.117935	3.90773	9.31677e-05	0.0008234	206.008	196.801	220.418	205.821	162.341	159.791	169.062	171.041	213.792	274.066	258.841	206.072	236.955	240.706
SLC5A9	7.07552	3.21597	0.823188	3.90672	9.3558e-05	0.000826365	0	1.32974	3.58403	3.17871	1.13924	0.807023	2.47408	2.45513	7.00957	10.541	19.8346	17.1727	3.94925	25.5822
RAD9A	203.693	-0.573563	0.14684	-3.90605	9.38182e-05	0.000828178	315.701	272.596	246.402	244.761	245.506	213.861	216.894	211.96	161.22	154.602	119.007	154.554	163.236	131.4
PLK4	813.258	-0.782514	0.200358	-3.90559	9.39963e-05	0.000829266	841.424	892.252	1041.16	1090.3	941.01	928.077	1045.71	1037.7	503.521	833.912	505.782	489.993	766.154	468.62
DYNC1I1	273.52	1.17724	0.301538	3.90412	9.45687e-05	0.000833829	112.368	119.676	232.066	232.046	117.911	124.282	233.388	228.327	418.238	363.08	456.195	357.191	355.432	479.086
2021-03-02	387.683	-0.65715	0.168366	-3.9031	9.49674e-05	0.000836855	520.372	531.894	394.243	377.472	501.265	526.986	415.645	388.73	313.094	337.313	247.932	296.514	313.307	262.799
PLCH2	38.0825	1.91603	0.490954	3.90266	9.51393e-05	0.000837881	20.0658	21.2758	17.0241	26.2243	18.2278	16.9475	14.0198	13.9124	36.2161	101.897	67.4375	18.3175	109.263	52.3273
SLC10A7	402.203	1.41207	0.362122	3.89942	9.64246e-05	0.000848705	189.956	206.109	349.443	336.943	120.19	160.598	295.24	252.879	482.492	645.345	939.167	299.949	559.477	793.049
GNAZ	144.463	0.632921	0.162356	3.89835	9.68485e-05	0.00085194	127.083	122.336	110.209	103.308	121.329	115.404	117.106	113.755	197.436	135.862	215.205	194.623	159.286	189.541
PIK3R3	338.692	1.152	0.29561	3.89704	9.73741e-05	0.000856064	206.008	207.439	271.49	254.297	200.506	239.686	216.894	232.419	647.217	299.833	484.955	786.507	290.928	403.502
NPEPPS	2158.61	0.349455	0.0897247	3.89475	9.83019e-05	0.000863718	1953.07	2039.81	2006.16	1877.03	1847.84	1933.63	1895.97	1933.83	2372.74	2403.35	2687.58	2301.14	2149.71	2818.7
BANP	174.488	-0.544654	0.139858	-3.89434	9.84659e-05	0.000864153	223.399	195.471	183.681	201.848	232.974	184.001	206.998	199.684	113.321	135.862	140.825	155.699	143.489	125.586
PRICKLE1	686.244	0.73599	0.188988	3.89438	9.84499e-05	0.000864153	577.894	538.543	758.022	767.658	275.696	292.142	452.756	419.828	1343.5	1082.21	1302.14	548.38	635.829	612.811
TICRR	748.708	-0.491788	0.126337	-3.89266	9.91501e-05	0.000869651	742.433	797.841	818.055	797.061	919.935	820.743	1004.47	932.133	581.794	625.434	479.005	672.023	759.572	531.413
SAE1	3803.41	-0.312972	0.0804092	-3.89225	9.93199e-05	0.000870636	4264.64	4393.44	4066.98	4156.16	4181	4255.43	4058.31	3993.68	3552.68	3458.63	2910.72	3506.66	3451.64	2997.77
MTA2	2750.36	-0.311556	0.0800508	-3.89198	9.9428e-05	0.000871077	3162.36	2922.76	3159.32	3075.4	2958.6	2804.41	2884.77	2902.79	2650.79	2724.27	2277.01	2438.52	2469.6	2074.49
F2R	135.198	0.818781	0.210633	3.88724	0.000101389	0.000887742	78.9253	90.422	99.4568	118.407	91.7086	97.6498	113.807	144.853	123.836	194.423	147.768	166.002	218.525	206.984
NOP53	961.028	-0.349172	0.0898654	-3.8855	0.00010212	0.00089362	1163.81	1094.37	1105.67	1055.33	1062.91	999.902	1067.15	1050.8	871.523	806.973	713.053	880.385	866.202	716.303
GABARAPL2	1098.49	0.708545	0.182365	3.88532	0.000102196	0.000893768	791.928	706.089	944.392	922.62	787.783	801.374	977.26	946.045	1139.05	1260.24	1799	1253.6	1240.06	1809.36
RARS	2076.73	-0.344385	0.0886568	-3.88447	0.000102553	0.000896372	2343.68	2458.68	2159.38	2235.43	2322.91	2445.28	2149.97	2180.98	1774.59	1967.66	1657.18	1690.93	1995.69	1691.92
TMEM8A	184.813	0.822175	0.211722	3.88327	0.000103059	0.000900275	133.772	118.346	167.553	158.935	128.164	125.896	150.094	157.129	255.849	176.855	272.725	287.356	169.818	284.893
LZTS3	636.968	0.371938	0.0957997	3.88246	0.000103405	0.000902772	639.429	546.521	583.301	558.658	518.353	507.618	592.953	593.324	720.817	710.933	800.325	655.995	725.345	763.979
PRR3	299.647	-0.533843	0.137546	-3.88119	0.000103948	0.000906994	369.21	369.666	327.939	349.658	330.949	377.687	333.175	338.808	248.84	257.669	176.528	267.893	243.537	203.495
CCDC66	126.804	-0.718943	0.185428	-3.87721	0.000105661	0.00092141	136.447	130.314	158.593	164.498	129.873	161.405	144.321	156.31	77.1053	127.663	119.007	90.4426	101.364	77.9096
ADAMTS12	4.352	3.40539	0.878387	3.87686	0.000105812	0.000922191	2.67543	0	0.896007	2.38403	1.70886	0.807023	0.824692	0	9.34609	5.85612	7.93383	11.4484	6.58208	10.4655
LOC507550	14.8829	1.636	0.422266	3.87433	0.000106917	0.000931279	8.0263	7.97841	8.96007	9.53613	7.40505	8.07023	7.42223	8.18378	18.6922	14.0547	37.6857	21.752	25.0119	25.5822
BCL2L14	830.475	0.311296	0.0803591	3.87381	0.000107146	0.00093274	576.556	545.191	526.852	620.643	937.023	818.322	873.348	950.137	775.726	847.966	823.135	1156.29	1084.73	1090.73
PLEKHG1	479.076	0.651428	0.168185	3.87329	0.000107377	0.000934208	240.789	261.958	256.258	236.814	476.201	492.284	418.943	461.565	686.938	394.703	602.971	874.66	633.196	669.79
SLC2A6	142.316	0.667693	0.172448	3.87185	0.000108014	0.000939212	136.447	139.622	105.729	112.844	112.785	106.527	110.509	117.028	177.576	158.115	184.461	184.32	129.009	217.449
NUDT7	501.933	0.264966	0.0684504	3.87092	0.000108425	0.000941548	362.521	384.293	346.755	354.426	584.999	568.144	569.862	603.145	386.695	398.216	370.906	701.789	706.916	688.395
PRPF39	442.64	-0.43915	0.113451	-3.87082	0.00010847	0.000941548	425.394	437.483	453.38	503.031	506.961	519.723	508.01	450.108	365.666	461.462	467.104	329.715	371.229	397.688
BAG2	422.227	-0.404931	0.104605	-3.87106	0.000108365	0.000941548	496.293	505.299	419.331	465.681	455.126	459.196	463.477	441.106	372.675	414.613	385.782	293.08	388.343	351.174
RBM12	1559.89	-0.321753	0.083141	-3.86997	0.000108851	0.000944311	1709.6	1914.82	1774.99	1781.67	1573.86	1671.35	1657.63	1617.93	1400.75	1547.19	1274.37	1308.56	1424.36	1181.43
HDAC2	3188.05	-0.37015	0.0957169	-3.86713	0.000110125	0.000954816	3352.32	3595.6	3575.96	3652.34	3390.37	3509.74	3544.52	3480.56	2698.68	3240.78	2509.07	2562.16	3055.4	2465.2
ORAI2	370.154	0.513438	0.132827	3.86547	0.000110875	0.000960768	408.004	416.207	324.355	290.852	301.898	318.774	277.921	255.334	450.949	436.867	465.121	409.854	392.292	433.735
OXR1	1030.65	0.506468	0.131076	3.86391	0.000111586	0.000966371	885.568	886.933	982.92	1055.33	713.163	747.304	936.025	882.211	1210.32	1228.61	1410.24	999.448	1128.17	1362.84
LOC112442687	23.0376	2.78922	0.721944	3.86348	0.000111782	0.000967514	10.7017	11.9676	10.7521	14.3042	3.98733	8.87726	4.94815	10.6389	72.4322	16.3971	10.909	8.0139	81.6178	56.9786
CAPN14	6.87941	4.56472	1.18156	3.86331	0.000111861	0.000967648	1.33772	1.32974	0	0	1.70886	0.807023	0	0.818378	1.16826	8.19857	18.8428	9.15875	5.26567	47.676
TFAM	1079.72	-0.424595	0.109962	-3.86127	0.0001128	0.000974863	1032.72	1167.51	1163.91	1204.73	1295.88	1333.2	1312.91	1108.08	808.437	1015.45	848.92	847.184	1059.72	917.472
CASP2	695.97	-0.402195	0.104163	-3.86122	0.000112824	0.000974863	775.876	763.268	845.831	834.411	701.77	777.163	796.652	823.288	584.131	582.098	499.831	586.16	666.107	506.994
TFG	1632.66	0.2229	0.0577461	3.86001	0.000113384	0.000979138	1421.99	1539.83	1507.98	1592.53	1457.65	1595.49	1604.85	1521.36	1761.74	1720.53	1729.57	1774.51	1783.74	1845.41
UNG	1299.23	-0.505803	0.131048	-3.85967	0.00011354	0.000979926	1692.21	1675.47	1510.67	1482.07	1441.14	1330.78	1467.13	1374.06	1217.33	1185.28	846.936	1042.95	1095.26	827.934
CHN2	718.376	1.10821	0.287202	3.85864	0.000114017	0.000983482	614.012	663.538	392.451	378.266	546.834	534.249	343.896	333.898	1365.7	756.611	1283.3	1091.04	617.399	1136.08
EEF2	40122.4	-0.178559	0.0462817	-3.85808	0.000114281	0.00098519	44678.4	44562.1	41925.1	41266	42183.7	42861	42022.2	41866.6	37572.5	36088.9	34738.3	38664.8	37072.9	36211.7
LOC112441476	16.0907	-2.02427	0.524762	-3.85749	0.000114557	0.000987006	17.3903	14.6271	25.9842	28.6084	32.4683	14.5264	23.9161	27.0065	5.84131	10.541	5.95037	6.86906	9.21491	2.32566
TMEM71	37.0378	1.26036	0.326761	3.85715	0.000114719	0.000987455	25.4166	17.2866	20.6082	30.9924	19.9367	20.9826	30.5136	23.733	47.8987	43.3353	68.4293	56.0973	34.2268	79.0724
B3GNT7	102.013	0.892888	0.231509	3.85682	0.000114871	0.000987455	108.355	83.7733	117.377	99.3346	46.7088	41.9652	61.0272	72.8356	128.509	185.053	174.544	81.2839	105.313	122.097
BYSL	623.535	-0.407323	0.105611	-3.85683	0.000114867	0.000987455	700.964	680.824	703.366	664.35	758.732	735.198	662.227	654.702	589.972	544.619	442.311	532.352	572.641	487.225
PABPC4	7521.1	-0.188897	0.048974	-3.85708	0.000114751	0.000987455	8002.22	8156.6	7855.3	7771.15	7978.08	8101.71	7927.76	7841.7	7365.89	6786.07	6555.33	7280.06	6825.62	6847.9
SLC45A4	298.696	0.613838	0.159201	3.85574	0.000115378	0.000991251	247.478	281.904	263.426	279.726	216.455	209.826	233.388	226.691	364.498	344.34	497.848	294.225	297.51	424.433
NDE1	1223.1	-0.492012	0.12768	-3.85349	0.000116445	0.000999847	1439.38	1369.63	1415.69	1363.67	1447.97	1422.78	1424.24	1330.68	1073.63	1059.96	774.54	1102.48	1095.26	803.515
MRPL15	2445.54	-0.380378	0.0987235	-3.85296	0.000116699	0.00100146	2666.07	2767.18	2785.69	2821.1	2571.26	2666.41	2728.08	2570.53	2279.28	2465.43	1843.62	1880.98	2281.35	1910.53
NFATC1	136.292	0.942889	0.244746	3.85252	0.000116909	0.00100254	107.017	118.346	100.353	74.6997	111.076	134.773	74.2223	90.84	181.081	113.609	209.255	194.623	173.767	224.426
TARBP1	886.776	-0.321795	0.0835307	-3.85242	0.000116958	0.00100254	952.454	998.631	984.712	1052.15	964.365	915.164	941.798	957.502	827.129	790.576	759.664	778.493	839.874	652.347
SET	6868.31	-0.330301	0.0857466	-3.85206	0.00011713	0.00100288	7738.69	8149.95	7091.9	7375.4	7779.86	7942.72	7342.23	7078.15	5564.43	6591.65	5516.99	5664.68	6524.16	5795.54
C14H8orf33	356.149	-0.475277	0.123381	-3.8521	0.000117109	0.00100288	434.758	398.921	404.099	398.928	451.138	391.406	374.41	414.918	294.402	301.005	239.998	329.715	309.358	243.031
PRPS1	1777.1	-0.286912	0.0745342	-3.8494	0.000118406	0.00101323	1947.72	1972	1958.67	1988.28	1888.29	1930.4	1924.83	1897.82	1600.52	1681.88	1389.41	1578.74	1692.91	1427.95
KALRN	272.796	0.965136	0.250829	3.84779	0.00011919	0.00101936	197.982	199.46	230.274	247.939	159.493	146.071	197.926	202.139	264.027	387.675	553.384	228.969	371.229	432.572
SLC43A2	460.84	1.03273	0.268529	3.8459	0.000120113	0.00102667	370.548	397.591	434.563	434.688	211.329	186.422	350.494	309.347	485.997	732.015	917.349	359.481	530.516	731.42
TDRKH	175.764	-0.792482	0.20608	-3.84551	0.0001203	0.00102769	226.074	249.99	211.458	202.643	208.481	194.493	197.101	223.417	135.518	145.232	108.098	119.064	165.868	73.2582
AGTRAP	337.586	0.471132	0.12252	3.84535	0.000120382	0.00102781	294.298	299.19	313.603	294.825	256.898	289.721	318.331	316.712	343.469	343.169	431.402	390.392	372.546	461.643
OVGP1	17.0558	-1.97783	0.514571	-3.84366	0.000121213	0.0010339	22.7412	13.2974	25.0882	23.8403	25.6329	13.7194	23.9161	38.4638	15.1874	9.36979	7.93383	5.72422	9.21491	4.65132
HNRNPA0	2831.48	-0.410232	0.106731	-3.84362	0.000121233	0.0010339	2985.78	2821.7	2962.2	2964.15	3369.3	3279.74	3473.6	3384.81	2246.57	2601.29	1925.94	2506.06	2917.18	2202.4
FLNB	11795.8	0.506089	0.13168	3.84333	0.000121377	0.00103455	7602.24	8126.01	7480.76	7562.94	12916.1	13415.1	10634.4	10589.8	13272.6	10792.8	12096.1	19619.2	13426.1	17607.6
OCEL1	388.835	0.522151	0.135871	3.843	0.000121538	0.00103534	390.613	361.688	346.755	325.818	334.936	324.423	307.61	314.257	519.876	359.566	479.005	484.269	384.394	510.482
HNRNPL	6479.69	-0.346552	0.0901871	-3.84259	0.000121744	0.00103651	7732	7260.35	6842.81	7171.17	7467.13	7038.86	7018.13	6920.2	5527.04	6077.48	4879.3	5631.48	6173.99	4975.75
POLA1	1423.4	-0.447388	0.116434	-3.84243	0.000121824	0.0010366	1575.83	1635.57	1750.8	1747.5	1494.11	1525.27	1623.82	1613.02	1192.79	1314.11	1011.56	1087.6	1373.02	982.591
SLTM	2243.06	-0.342484	0.0891418	-3.84202	0.000122026	0.00103774	2421.27	2331.03	2528.53	2650.25	2429.99	2397.67	2438.61	2316.01	1904.27	2302.63	2011.23	1687.5	2112.85	1870.99
KIFC1	1247.66	-0.454752	0.118439	-3.83954	0.000123265	0.00104769	1494.23	1417.5	1421.07	1414.53	1419.49	1350.15	1420.12	1405.97	1046.76	1151.31	861.812	1058.98	1180.83	824.446
TXNDC5	3784.58	0.178288	0.0464416	3.83896	0.000123555	0.00104934	3763	3614.22	3506.97	3502.14	3712.21	3610.62	3455.46	3467.47	4209.25	4037.21	4010.55	4082.51	4032.18	3980.36
RHOD	259.327	0.651168	0.169625	3.83888	0.000123598	0.00104934	268.881	228.714	217.73	197.875	193.101	191.265	178.958	190.682	392.536	265.868	417.518	289.645	250.119	347.686
C18H19orf33	1437.85	0.890034	0.231938	3.83738	0.000124355	0.00105517	1301.6	1362.98	903.175	829.643	1277.66	1175.03	840.361	869.117	2198.67	1453.49	2132.22	2226.72	1403.3	2155.89
C17H4orf33	61.661	1.06759	0.278303	3.83607	0.000125021	0.00106022	46.8201	42.5515	43.0083	54.038	37.5948	38.7371	44.5334	54.0129	66.5909	55.0475	107.107	92.7323	61.8716	118.609
EIF3G	2354.06	-0.275055	0.0717113	-3.8356	0.00012526	0.00106151	2783.79	2684.74	2428.18	2515.15	2607.72	2559.07	2457.58	2335.65	2248.9	2172.62	1988.42	2144.29	2056.24	1974.48
DIAPH2	1161.37	0.367772	0.0958866	3.83549	0.000125314	0.00106151	957.805	1034.53	1148.68	1041.82	960.377	1105.62	967.363	989.419	1510.56	1283.66	1369.58	1308.56	1163.71	1417.49
LOC112448928	100.983	-0.655962	0.171071	-3.83445	0.000125845	0.00106542	127.083	130.314	105.729	108.871	123.607	132.352	104.736	111.299	87.6196	86.6706	70.4127	82.4287	76.3521	66.2813
SESN1	59.3966	0.772398	0.201479	3.83364	0.000126263	0.00106836	53.5087	51.8597	51.9684	39.7339	42.1518	44.3863	46.1827	44.1924	75.937	70.2735	85.2886	62.9664	72.4029	90.7007
IKBKB	726.557	0.319859	0.0834526	3.83282	0.000126684	0.00107132	600.635	551.84	623.621	667.529	676.138	682.742	685.319	724.265	768.716	748.412	853.878	884.964	799.065	904.681
LOC112444293	7.9347	-6.1456	1.60374	-3.83203	0.000127089	0.00107414	0	3.98921	25.0882	19.0723	7.97466	6.45619	28.8642	19.6411	0	0	0	0	0	0
SMARCE1	2380.57	-0.158547	0.0413775	-3.83172	0.000127252	0.00107491	2339.67	2466.66	2360.08	2447.61	2594.61	2619.6	2558.19	2500.14	2185.82	2166.76	2185.77	2304.57	2278.72	2319.84
MISP	40.9666	1.94878	0.508834	3.82989	0.000128202	0.00108234	12.0395	7.97841	2.68802	3.17871	37.0252	41.1582	16.4938	23.733	21.0287	15.2259	49.5864	111.05	57.9223	174.424
STAG3	360.303	-0.678406	0.17715	-3.82956	0.000128373	0.00108317	378.574	426.845	483.844	459.323	400.442	361.546	457.704	419.828	255.849	358.395	271.734	204.927	339.635	225.589
FKBP14	231.443	0.787199	0.205719	3.82658	0.000129934	0.00109573	167.215	148.93	220.418	174.829	149.81	167.054	178.133	174.315	241.83	340.826	411.567	223.244	280.397	361.64
SDR42E1	101.487	0.750531	0.196154	3.82622	0.000130124	0.00109632	86.9516	87.7625	76.1606	73.1103	82.5947	77.4742	75.8716	72.8356	160.052	110.095	128.925	167.147	97.4148	124.423
LUC7L	605.064	-0.362352	0.0947033	-3.82618	0.000130149	0.00109632	690.262	683.484	662.149	679.449	719.429	689.198	588.005	648.974	584.131	480.202	499.831	535.787	523.934	486.063
CTNNBIP1	239.693	0.537052	0.140374	3.82586	0.000130318	0.00109713	248.815	244.671	200.706	175.624	193.101	218.703	174.835	184.135	308.421	279.923	288.593	311.397	259.334	267.451
TMEM30A	1233.59	0.454175	0.118728	3.82536	0.000130582	0.00109874	869.516	958.739	1102.98	1084.73	984.871	1120.15	1140.55	1151.46	1410.09	1318.8	1612.55	1303.98	1505.98	1705.87
ACTR2	8571.23	0.529199	0.138382	3.82417	0.000131211	0.00110342	6141.46	6288.32	7496	7650.36	6977.26	6915.38	8312.89	7788.5	8603.08	10777.6	10582.7	8569.15	11706.9	12187.6
ATXN7	959.388	-0.403337	0.105479	-3.82385	0.000131384	0.00110364	919.011	847.041	932.743	1002.09	1109.62	1124.18	1347.55	1176.01	771.053	811.658	693.218	971.972	943.871	781.421
EIF3B	5577.9	-0.33101	0.0865629	-3.82393	0.000131343	0.00110364	6597.62	6829.52	5860.78	5739.95	6398.53	6490.08	5536.98	5582.97	5056.24	5001.13	4679.97	4935.42	4850.99	4530.38
MMS22L	445.195	-0.782255	0.204602	-3.8233	0.000131675	0.00110547	477.565	519.926	593.157	548.327	489.303	547.969	544.297	543.403	316.599	446.236	277.684	215.231	430.468	282.567
PPP2R3A	671.079	-0.394224	0.103118	-3.82303	0.000131822	0.00110609	758.485	700.77	835.079	797.061	661.328	794.918	682.845	697.258	629.693	653.543	565.285	554.104	584.489	480.248
TTI1	325.636	-0.495268	0.129591	-3.82178	0.000132491	0.00111108	436.096	361.688	361.987	340.917	401.581	355.09	339.773	356.813	268.7	309.203	252.891	295.37	256.701	222.1
CPSF6	2154.88	-0.473045	0.123791	-3.82133	0.000132733	0.00111249	2271.44	2257.89	2596.63	2614.49	2447.08	2530.02	2499.64	2359.38	1591.17	2105.86	1577.84	1505.47	2049.66	1761.69
DNAI1	27.0677	1.64412	0.430315	3.82074	0.000133054	0.00111456	21.4035	19.946	13.4401	7.94677	14.8101	12.1053	8.24692	13.9124	63.0861	36.308	52.5616	49.2283	17.1134	48.8388
MELK	1035.08	-0.597524	0.156412	-3.82018	0.000133352	0.00111644	1116.99	1151.55	1232.91	1223.8	1244.05	1242.01	1189.21	1205.47	800.259	1018.97	644.624	764.755	1012.32	644.207
GDPD5	367.743	0.824252	0.215809	3.81936	0.000133799	0.00111957	288.947	281.904	294.786	260.654	228.417	270.353	291.941	325.714	438.098	339.655	647.599	427.027	406.773	646.533
INTS14	210.498	-0.536408	0.14045	-3.81921	0.000133878	0.0011196	214.035	256.639	244.61	246.35	241.518	243.721	236.687	247.969	181.081	200.279	131.9	175.161	181.665	145.354
SUMO2	3603.9	-0.251381	0.0658298	-3.81865	0.000134185	0.00112155	3788.41	3973.25	3784.73	3692.86	3930.37	3952.8	3923.06	3921.67	3024.63	3512.5	3037.66	3086.5	3510.88	3315.23
RRBP1	4840.01	0.329339	0.086252	3.81834	0.000134354	0.00112234	4474.66	4418.71	5111.72	4703.69	4078.47	3826.9	4457.46	4410.24	5611.16	5584.4	5278.97	5845.57	5180.1	4778.06
RFXAP	306.262	-0.380655	0.0996978	-3.81809	0.000134489	0.00112285	292.96	337.753	351.235	352.042	341.202	321.195	351.319	329.806	271.037	299.833	265.783	269.038	247.486	256.985
ZNF692	88.1696	-0.734201	0.192386	-3.81629	0.000135471	0.00113042	128.421	114.357	98.5608	87.4145	104.24	100.878	110.509	103.116	52.5718	64.4173	81.3217	67.5458	60.5552	60.4671
PRRC2A	6198.67	-0.330035	0.0864845	-3.81611	0.000135571	0.00113063	7017.66	6953.19	7719.1	7147.33	6294.86	6029.27	6976.07	7178.81	5414.89	5517.64	4734.51	5483.8	5490.77	4823.42
DNAJC30	258.432	-0.492909	0.129192	-3.81532	0.000136008	0.00113365	347.806	295.201	287.618	297.209	313.86	293.756	274.622	257.789	193.931	242.443	204.296	214.086	219.842	175.587
GPR107	463.953	0.471969	0.123748	3.81395	0.000136761	0.00113842	351.82	376.315	423.811	447.403	340.062	339.757	441.21	434.559	603.991	562.188	559.335	528.918	517.352	568.623
KLC4	229.48	0.835858	0.219156	3.81399	0.00013674	0.00113842	211.359	214.087	172.929	134.3	166.898	142.843	165.763	162.039	379.685	234.245	375.865	348.032	209.31	295.359
SGCB	1008.37	0.43252	0.113407	3.81387	0.000136807	0.00113842	951.117	933.474	824.327	850.305	927.909	986.99	806.548	744.724	1288.59	1089.24	1204.95	1170.03	1061.03	1277.95
FAM177A1	581.612	0.53824	0.141217	3.81144	0.000138162	0.00114907	488.267	502.64	420.227	483.958	520.632	539.899	510.484	487.753	589.972	573.9	783.465	681.182	645.044	915.147
TOMM40L	500.244	-0.331668	0.087029	-3.81101	0.000138402	0.00115043	561.841	551.84	526.852	520.514	573.037	538.285	579.758	532.764	429.92	460.291	404.625	485.414	397.558	440.712
MGME1	277.925	-0.482431	0.12663	-3.80978	0.000139089	0.00115506	381.249	344.401	326.147	292.441	318.417	319.581	284.519	306.073	209.119	249.471	198.346	219.81	244.853	196.518
IL2RB	25.5592	-1.36697	0.35881	-3.80974	0.000139112	0.00115506	10.7017	6.64868	12.5441	7.94677	59.2404	52.4565	38.7605	58.9232	14.0191	19.9108	14.8759	11.4484	32.9104	17.4424
SLC35E4	125.151	0.831338	0.218294	3.80834	0.000139902	0.00116098	119.057	119.676	93.1847	73.1103	107.658	92.8077	84.9432	79.3827	164.725	149.917	180.495	178.596	113.212	195.355
SPATS2L	1148.98	0.405753	0.106624	3.80544	0.000141551	0.00117402	874.867	937.463	1141.51	1108.57	979.745	1007.17	1085.29	1006.6	1414.76	1198.16	1281.31	1484.86	1257.18	1308.18
FIP1L1	1650.11	-0.436003	0.11462	-3.80391	0.000142429	0.00118065	1768.46	1900.19	2048.27	2091.59	1638.79	1685.87	1835.76	1845.44	1370.37	1714.67	1317.02	1238.72	1483.6	1162.83
DRG2	753.157	-0.399705	0.105115	-3.80254	0.000143221	0.00118657	904.297	902.89	767.878	803.419	910.251	857.059	797.477	806.921	647.217	641.831	585.12	669.733	708.232	541.878
BIRC5	2438.08	-0.464366	0.122143	-3.80183	0.00014363	0.001189	2696.84	2688.72	2944.28	2859.25	2549.61	2588.12	2944.97	2827.5	1991.89	2381.1	1728.58	1850.07	2337.96	1744.24
ELP3	477.202	-0.346194	0.0910615	-3.80176	0.000143673	0.001189	490.942	514.607	526.852	523.692	506.961	547.162	515.432	528.672	415.901	455.606	414.542	374.364	476.543	389.548
NFE2L1	3164.35	0.398872	0.10493	3.8013	0.00014394	0.00119041	3080.76	2779.15	2583.19	2676.47	3109.55	3053.78	2660.46	2614.72	3555.02	3210.33	3666.42	4159.22	3252.86	3898.97
CPT1B	48.2189	-1.03541	0.272391	-3.80119	0.000144	0.00119041	58.8595	59.8381	51.9684	69.9316	70.6327	50.0354	76.6963	51.5578	33.8796	38.6504	21.818	35.4901	28.9612	26.7451
PMVK	184.406	0.989868	0.260474	3.80026	0.000144547	0.00119427	159.188	99.7301	117.377	120.791	124.177	122.668	112.983	110.481	332.955	182.711	398.675	289.645	157.97	252.334
POLR2J	213.503	-0.536808	0.141265	-3.80002	0.000144685	0.00119476	234.1	239.352	214.146	239.993	229.556	242.107	282.045	268.428	143.696	190.91	175.536	152.264	210.627	166.285
MGC148714	2177.67	0.349738	0.0920458	3.7996	0.000144929	0.00119612	2160.41	1995.93	1786.64	1757.83	2078.54	1921.52	1979.26	1894.55	2408.96	2302.63	2675.68	2509.5	2298.46	2717.53
CMIP	889.589	0.689947	0.181606	3.79915	0.000145195	0.00119766	646.117	639.603	858.375	843.152	591.834	583.478	792.529	766.002	979.003	1082.21	1365.61	872.371	1117.64	1316.32
DNAJB9	213.043	0.849263	0.22363	3.79763	0.000146084	0.00120433	133.772	117.017	154.113	163.704	173.164	165.44	159.99	117.028	293.234	269.382	403.633	235.838	217.209	379.082
GSS	381.047	0.563501	0.148448	3.79595	0.00014708	0.00121189	381.249	324.455	294.786	298.799	344.05	330.88	293.59	299.526	454.454	359.566	547.434	478.545	413.355	513.97
SLC1A1	960.727	0.524649	0.138222	3.79569	0.000147234	0.00121249	833.398	881.614	720.39	758.122	833.352	834.462	748.82	787.28	990.686	1394.93	1207.93	927.323	1319.05	1212.83
DCLRE1B	1546.35	0.395709	0.104314	3.79345	0.000148571	0.00122283	1376.51	1392.23	1466.76	1402.61	1370.5	1338.85	1372.29	1294.67	2053.8	1608.09	1669.08	2060.72	1611.29	1631.45
BoLA	1087.27	0.487072	0.128427	3.7926	0.000149078	0.00122619	801.292	745.981	688.134	642.099	1160.31	1059.62	1087.77	1049.98	1281.58	992.027	1132.55	1856.94	1346.69	1376.79
CTGF	3787.33	0.967301	0.255057	3.7925	0.000149141	0.00122619	3379.07	2975.95	2119.95	2000.2	2793.98	2523.56	1978.44	2001.75	8105.4	4081.72	7428.05	5626.91	3252.86	4754.81
MIS18BP1	1126.24	-0.587326	0.154887	-3.79197	0.000149457	0.00122812	1209.3	1331.06	1318.03	1462.21	1244.62	1309.8	1273.32	1307.77	869.187	1154.83	721.978	739.569	1057.08	768.63
CENPQ	320.48	-0.616919	0.162718	-3.79133	0.000149845	0.00123064	353.157	370.996	354.819	400.517	428.923	404.319	329.877	326.533	230.148	324.429	232.064	222.1	294.877	213.961
TSHZ3	98.6727	-0.723673	0.190951	-3.78983	0.000150753	0.00123742	113.706	135.633	119.169	125.559	113.924	120.246	110.509	90.0216	107.48	79.6432	67.4375	67.5458	72.4029	58.1415
RHNO1	1242.31	-0.410553	0.108376	-3.78824	0.000151718	0.00124467	1363.13	1434.78	1417.48	1502.73	1352.84	1375.17	1424.24	1349.51	1061.95	1147.8	856.853	1063.56	1159.76	882.587
XPO4	727.268	-0.383342	0.101249	-3.78612	0.000153018	0.00125334	830.722	836.403	800.134	837.59	792.34	844.146	771.911	756.181	592.309	723.817	574.211	598.753	687.169	536.064
PRSS48	32.3955	1.37898	0.364201	3.78632	0.000152898	0.00125334	22.7412	11.9676	14.3361	23.0456	10.8228	20.1756	27.2148	21.2778	64.2544	30.4518	54.5451	57.2422	40.8089	54.653
CTF1	27.5529	1.22138	0.322595	3.78611	0.000153025	0.00125334	26.7543	15.9568	16.1281	13.5095	18.7974	19.3686	18.1432	9.00216	43.2257	38.6504	51.5699	43.504	31.594	39.5362
RASAL1	691.663	0.842144	0.222579	3.78357	0.000154595	0.00126552	517.696	482.694	661.253	626.206	383.354	388.178	548.42	592.506	724.322	1027.16	1161.31	607.912	951.769	1010.5
MRPS30	618.536	-0.278405	0.0735914	-3.78312	0.000154873	0.00126642	652.806	690.133	669.317	655.609	647.657	696.461	659.753	631.788	621.515	546.962	557.351	526.628	558.161	545.367
C25H7orf50	232.748	0.478136	0.126386	3.78314	0.00015486	0.00126642	214.035	175.525	214.146	225.688	182.848	181.58	211.121	222.599	248.84	263.525	287.601	306.818	256.701	267.451
MSH6	3006.83	-0.565094	0.149382	-3.78289	0.000155018	0.00126692	3241.29	3477.26	4031.14	3986.1	2891.39	3018.27	3570.91	3597.59	2434.66	3013.56	2202.63	2013.78	2706.55	1910.53
ALG10	585.102	-0.538046	0.14225	-3.7824	0.000155326	0.00126875	544.451	593.062	672.901	735.871	678.986	744.075	719.131	622.786	440.435	565.701	444.294	405.275	558.161	466.294
DIXDC1	398.315	0.360516	0.0953554	3.78077	0.000156347	0.0012764	267.543	311.158	280.45	297.209	381.075	423.687	388.43	422.283	449.781	391.189	407.6	488.848	575.274	491.877
AAR2	395.631	-0.389332	0.103017	-3.77928	0.00015728	0.00128332	450.811	394.931	432.771	418	463.67	475.337	440.385	419.01	348.142	379.477	285.618	343.453	348.85	338.383
MRPS22	566.734	-0.293849	0.0778036	-3.77681	0.000158852	0.00129545	631.402	667.527	570.757	597.597	639.112	617.373	578.109	601.508	516.372	502.455	519.666	491.138	498.922	502.342
TMCC3	483.012	0.40648	0.107637	3.77638	0.000159123	0.00129695	405.328	449.45	465.028	452.966	471.075	426.108	488.217	495.937	369.171	449.75	421.485	683.471	531.832	652.347
TUBGCP6	507.091	-0.351715	0.0931784	-3.77464	0.000160239	0.00130464	604.648	518.597	583.301	567.4	561.644	518.109	567.388	546.677	452.117	462.634	425.452	454.503	464.695	372.105
GK	59.276	-1.04223	0.276104	-3.77477	0.000160153	0.00130464	72.2367	79.7841	84.2247	65.1635	78.0378	73.4391	73.3976	76.9275	22.197	57.39	36.694	22.8969	42.1253	45.3503
FTSJ3	992.458	-0.280286	0.0742633	-3.77421	0.000160512	0.00130616	1103.62	1102.35	983.816	1011.62	1121.58	1121.76	1088.59	1014.79	936.946	867.877	853.878	887.254	949.136	851.191
SEMA4F	934.548	0.594823	0.157661	3.77281	0.00016142	0.00131184	850.788	827.095	748.166	704.084	829.935	825.585	718.306	689.074	1299.11	915.897	1206.93	1370.38	881.999	1216.32
FOXN1	19.5562	2.97876	0.789549	3.77273	0.000161471	0.00131184	0	6.64868	10.7521	6.35742	2.27848	2.42107	4.94815	5.72865	14.0191	25.7669	105.123	14.883	23.6955	51.1645
DAZAP1	2064.17	-0.39608	0.104978	-3.77299	0.000161303	0.00131184	2398.53	2248.58	2323.35	2349.86	2336.01	2224.16	2277.8	2185.07	1695.15	2130.46	1583.79	1605.07	1961.46	1579.12
LOC101904332	49.4987	1.53366	0.40654	3.77247	0.00016164	0.00131251	8.0263	1.32974	8.06406	9.53613	37.5948	16.1405	35.4617	65.4702	64.2544	42.1641	69.421	91.5875	97.4148	146.516
PIGW	388.893	-0.528082	0.140041	-3.77091	0.000162653	0.00132002	434.758	534.554	417.539	433.099	443.164	472.109	403.274	416.554	383.19	311.546	291.568	336.584	321.206	245.357
KIFC2	155.504	-0.641076	0.170017	-3.77066	0.000162814	0.00132013	197.982	210.098	195.33	196.285	174.303	161.405	169.886	171.859	137.855	110.095	126.941	148.83	94.782	81.398
CHD3	3405.33	0.142623	0.0378248	3.77062	0.000162841	0.00132013	3444.62	3392.15	3314.33	3358.31	3169.36	3192.58	3126.41	3192.49	3543.34	3676.47	3767.58	3530.7	3446.38	3519.88
PARP10	518.774	0.581372	0.154193	3.77042	0.000162973	0.00132032	385.262	384.293	305.538	258.27	552.53	562.495	507.185	534.401	545.578	363.08	444.294	886.109	747.724	786.072
ZNF800	1617.56	0.26956	0.0714952	3.77032	0.000163039	0.00132032	1325.68	1486.64	1535.76	1487.64	1381.33	1530.12	1440.74	1415.79	2056.14	1869.27	1903.13	1627.97	1779.79	1805.87
CAD	2376.87	-0.373673	0.0991311	-3.76948	0.000163587	0.00132334	2952.34	2878.88	2567.96	2504.03	2721.07	2694.65	2403.98	2496.87	2172.97	2100	1809.9	2143.15	2073.36	1757.03
GPR20	6.9063	3.63659	0.96473	3.76954	0.000163547	0.00132334	4.01315	7.97841	2.68802	2.38403	1.13924	0.807023	0	0.818378	18.6922	10.541	20.8263	16.0278	2.63283	8.1398
NSD2	2189.39	-0.686685	0.182267	-3.76747	0.000164911	0.00133333	2560.39	2498.57	2829.59	2866.4	2541.07	2403.32	2698.39	2668.73	1667.11	1918.47	1193.05	1574.16	2089.15	1143.06
RASSF6	47.9986	1.72479	0.457888	3.76683	0.000165332	0.00133602	22.7412	17.2866	9.85608	6.35742	42.1518	28.2458	18.1432	31.0984	85.2831	33.9655	79.3383	140.816	47.391	109.306
PABPN1	2028.65	-0.264157	0.0701374	-3.76628	0.000165701	0.00133828	2223.29	2151.51	2083.22	2152.78	2369.05	2202.37	2256.36	2067.22	1799.12	1868.1	1670.07	1959.97	1886.42	1711.68
NCAPD2	2821.41	-0.600455	0.159474	-3.76522	0.0001664	0.00134321	3254.66	3122.22	3624.35	3592.74	3071.39	2802.79	3538.75	3500.2	2033.94	2683.27	1886.27	1990.88	2685.49	1712.85
INIP	705.46	-0.316577	0.0840833	-3.76504	0.000166524	0.0013435	754.472	853.69	759.814	828.848	698.353	722.286	808.198	743.087	629.693	657.057	630.739	562.118	648.993	579.089
GPATCH4	745.686	-0.428471	0.113845	-3.76364	0.000167458	0.00135031	884.231	856.349	798.342	797.061	977.466	842.532	795.827	747.179	661.236	673.454	528.591	610.202	664.79	602.345
POLR1D	1278.9	0.220609	0.0586253	3.76303	0.000167868	0.00135289	1149.1	1179.48	1233.8	1223.01	1184.81	1171.8	1226.32	1265.21	1271.07	1359.79	1405.28	1378.39	1411.2	1445.4
PCNP	2254.97	-0.312396	0.0830246	-3.76269	0.000168093	0.00135398	2282.14	2506.55	2258.83	2411.05	2562.72	2658.33	2417.17	2361.02	1910.11	2231.18	1928.91	1820.3	2104.95	2116.35
NUDT1	314.95	-0.600758	0.159672	-3.76245	0.000168256	0.00135434	413.354	352.38	352.131	333.764	428.923	361.546	344.721	361.723	260.522	278.751	179.503	261.024	275.131	205.821
FAM32A	889.531	0.400374	0.106416	3.76236	0.000168317	0.00135434	870.854	865.658	734.726	766.069	841.327	778.777	768.613	756.181	1039.75	843.281	1075.03	1081.88	925.441	1105.85
CNKSR2	240.672	-0.731293	0.19443	-3.76122	0.000169089	0.00135983	315.701	325.785	301.954	273.369	268.86	305.055	265.551	247.15	196.268	254.156	123.966	157.988	188.248	145.354
GZMA	6.12412	-3.59092	0.95496	-3.76028	0.000169722	0.00136419	5.35087	6.64868	6.27205	6.35742	13.6709	20.1756	12.3704	11.4573	0	0	0	3.43453	0	0
TOE1	493.76	-0.38513	0.102446	-3.75935	0.000170357	0.00136784	552.477	529.235	499.076	463.297	599.809	522.951	611.921	552.405	442.771	447.408	375.865	438.475	469.961	406.99
SMIM14	1654.24	0.386063	0.102693	3.7594	0.000170324	0.00136784	1340.39	1366.97	1504.4	1629.88	1386.45	1531.73	1505.89	1365.05	2052.64	1784.95	2020.15	1855.79	1673.17	2141.93
ADAM19	5.24123	2.68831	0.715407	3.75774	0.000171455	0.00137592	0	1.32974	0.896007	2.38403	2.27848	0.807023	3.29877	1.63676	9.34609	8.19857	3.96691	8.0139	18.4298	12.7911
ARL8A	574.127	0.448176	0.119291	3.75701	0.000171957	0.00137922	468.201	430.834	532.228	560.247	446.581	437.407	551.719	563.862	698.62	633.632	671.4	691.485	660.841	690.721
TFPT	166.008	-0.537028	0.142963	-3.75641	0.000172368	0.00138178	145.811	207.439	187.266	166.882	214.746	208.212	198.751	194.774	113.321	138.204	124.958	136.236	161.919	125.586
FN1	94703.4	0.588227	0.156599	3.75627	0.000172467	0.00138184	85026.6	81498.1	70427.1	71416.8	90342.1	78216.7	67699.8	67792	146075	98562	125958	135514	95706.1	111613
LOC101905979	1642.35	0.621859	0.1656	3.75518	0.000173215	0.00138709	1403.26	1634.24	1178.25	1106.99	1478.73	1486.54	1150.44	1189.92	2369.23	1817.74	2053.87	2414.47	1692.91	2016.35
GABPB1	404.4	-0.427901	0.11396	-3.75484	0.000173454	0.00138756	383.925	397.591	403.203	466.476	489.303	526.179	489.867	502.484	269.868	338.484	273.717	321.701	408.089	390.711
CEP44	241.991	-0.64563	0.171946	-3.75483	0.000173457	0.00138756	276.907	300.52	284.93	276.548	280.822	310.704	263.077	291.343	162.388	217.848	171.569	177.451	243.537	130.237
SLC25A44	846.207	-0.234865	0.0625691	-3.75368	0.000174256	0.00139321	928.375	968.047	953.352	943.282	832.783	861.094	888.193	901.853	769.884	798.775	782.474	759.031	760.889	698.86
PAK1IP1	883.005	-0.340033	0.0905973	-3.75323	0.000174569	0.00139498	976.533	1001.29	911.239	917.057	1013.92	1028.95	908.81	886.303	831.802	874.904	733.879	736.134	821.444	719.791
PLEKHA5	890.787	0.29591	0.0788849	3.75116	0.000176016	0.0014058	816.007	801.83	791.174	770.837	809.998	910.322	747.995	792.19	1026.9	970.945	1030.41	936.482	1003.11	1062.83
ARHGEF6	247.495	0.743985	0.198421	3.74952	0.000177171	0.00141428	189.956	184.833	185.473	186.749	174.873	150.913	208.647	238.966	386.695	263.525	325.287	354.901	230.373	383.734
PPIL1	654.468	-0.3313	0.0883618	-3.74936	0.000177289	0.00141447	785.24	765.927	702.47	671.502	695.505	743.268	663.877	738.995	568.943	584.441	546.442	528.918	623.981	543.041
FBLN2	7.56075	2.91155	0.776825	3.74801	0.000178241	0.00142131	6.68858	1.32974	4.48004	4.76806	1.70886	1.61405	3.29877	1.63676	3.50478	11.7122	18.8428	4.57937	18.4298	23.2566
RPL6	11063.6	-0.235411	0.0628148	-3.74769	0.000178469	0.00142238	12682.9	12615.2	11026.3	11102.4	12409.1	12307.9	11568	11520.3	9726.94	9873.42	9599.93	10197.1	10215.4	10045.7
SNRPB	3039.07	-0.413391	0.110311	-3.7475	0.000178604	0.00142271	3610.5	3559.7	3266.84	3169.17	3503.16	3533.15	3227.02	3336.53	2817.85	2680.93	2181.8	2740.75	2777.64	2141.93
ZDHHC5	1815.62	0.226372	0.0604144	3.74698	0.000178974	0.00142415	1732.34	1652.86	1749.9	1853.19	1654.74	1653.59	1683.2	1720.23	1886.74	1910.27	2036.02	1927.92	1869.31	2088.44
EIF4H	4346.63	-0.197132	0.0526093	-3.74709	0.000178899	0.00142415	4762.27	4938.64	4504.23	4582.11	4480.62	4709.79	4548.17	4506.81	3914.84	4166.04	3801.3	3869.57	4142.76	3925.71
SRRM2	9878.13	-0.328271	0.0876156	-3.74672	0.000179164	0.00142491	11164.6	11177.8	11052.2	10790.9	11538.2	10573.6	10354.8	10104.5	9187.21	8939.95	7977.46	9511.36	8548.81	7372.34
LMTK2	1405.67	0.338872	0.0904776	3.74537	0.000180131	0.00143185	1226.69	1239.31	1288.46	1319.96	1295.88	1297.69	1301.36	1244.75	1351.68	1503.85	1735.52	1556.99	1512.56	1804.71
SYBU	420.443	0.717622	0.19164	3.74463	0.000180658	0.00143528	393.289	368.337	523.268	487.137	194.81	203.37	296.064	285.614	563.102	618.406	746.772	351.467	377.811	476.76
CKMT1A	5.75997	5.83405	1.55824	3.744	0.000181112	0.00143813	1.33772	0	0.896007	3.17871	0	0.807023	0	0	4.67305	2.34245	28.7601	2.28969	2.63283	33.722
SUPT16H	4107.35	-0.277637	0.0741757	-3.74297	0.000181859	0.0014433	4152.27	4531.74	4618.92	4630.58	4091.57	4410.38	4512.71	4402.06	3748.95	4079.37	3547.41	3412.78	3916.34	3447.79
TMEM141	121.797	0.740557	0.197861	3.74281	0.000181973	0.00144345	128.421	95.7409	81.5367	84.2358	101.962	101.685	76.6963	94.9318	174.071	142.889	152.726	196.913	130.325	143.028
ACAD9	362.157	-0.475414	0.127052	-3.74188	0.000182649	0.00144805	453.486	437.483	405.891	423.563	417.531	404.319	364.514	401.005	373.844	284.607	246.94	299.949	289.612	267.451
AREG	38.5118	1.24777	0.333516	3.74127	0.000183095	0.00145082	10.7017	26.5947	25.0882	19.0723	26.7721	27.4388	23.9161	19.6411	35.0478	67.931	82.3135	45.7937	57.9223	70.9326
CHCHD7	308.095	0.391338	0.104613	3.7408	0.000183439	0.00145278	263.53	295.201	251.778	218.536	294.493	267.125	274.622	285.614	371.507	350.196	336.196	365.205	356.749	382.571
GDI1	1433.42	0.469464	0.125567	3.73875	0.000184934	0.00146386	1177.19	1105.01	1343.11	1386.71	1150.06	1107.24	1338.47	1318.41	1720.85	1460.52	1860.48	1818.01	1448.06	1833.78
FAM102A	431.693	0.747221	0.199872	3.73851	0.000185116	0.00146453	410.679	351.05	551.044	545.943	197.088	201.756	244.109	279.067	656.563	573.9	873.713	375.509	344.901	438.387
LOC104971501	334.895	-0.642185	0.171804	-3.73789	0.000185573	0.00146738	399.977	381.634	464.132	462.502	357.721	347.02	374.41	369.907	211.455	357.223	264.792	212.941	288.295	196.518
LOC112443469	11.644	1.74978	0.468206	3.7372	0.000186083	0.00147064	10.7017	3.98921	4.48004	3.97339	3.41771	8.87726	4.94815	5.72865	19.8604	16.3971	23.8015	17.1727	21.0627	18.6053
CYP27A1	300.292	0.704651	0.188716	3.73393	0.000188516	0.00148909	278.245	219.406	231.17	240.787	217.594	242.914	244.933	234.874	446.276	290.464	410.576	465.951	264.6	416.293
ICAM1	68.4116	1.13635	0.304354	3.73363	0.000188737	0.00149006	38.7938	30.5839	45.6964	45.2966	37.0252	29.0528	53.605	63.0151	70.0957	106.581	137.85	76.7045	101.364	122.097
HGSNAT	854.047	0.443688	0.118873	3.73245	0.000189624	0.00149627	763.836	792.522	729.35	650.046	695.505	744.075	743.872	753.726	1051.44	877.247	1162.31	1119.66	845.139	1027.94
SH3RF1	221.648	0.479075	0.128406	3.73094	0.000190769	0.00150452	201.995	207.439	202.498	173.24	199.367	182.387	195.452	184.135	288.561	221.361	250.907	305.673	243.537	246.52
ANXA11	1029.36	0.633948	0.169933	3.73059	0.000191033	0.00150582	988.573	865.658	787.59	768.453	877.783	871.585	753.768	736.54	1620.38	1071.67	1299.16	1507.76	950.453	1311.67
BOK	226.23	0.510172	0.136796	3.72943	0.000191913	0.00151197	223.399	212.758	203.394	221.715	158.924	208.212	171.536	176.77	325.945	241.272	261.816	280.487	235.639	245.357
DAG1	7651.74	0.240241	0.0644229	3.72913	0.000192144	0.00151299	7457.77	7466.46	7381.31	7256.99	6707.26	7100.19	6953.8	7137.89	7933.66	7936.22	9082.25	8121.52	7735.26	8853.78
BUB1	1401.5	-0.657059	0.176206	-3.72893	0.000192294	0.00151338	1642.72	1692.75	1679.12	1633.06	1616.58	1651.17	1665.88	1696.5	1010.55	1314.11	862.804	867.791	1450.69	837.237
RPS4X	8918.4	-0.2983	0.0800166	-3.72798	0.000193021	0.00151832	10036.9	10838.7	9029.06	8921.84	10045.8	10380.7	9144.18	9678.14	7995.58	7390.42	7458.79	8381.4	7602.3	7953.75
CEP128	105.625	-0.679263	0.18226	-3.7269	0.000193849	0.00152371	97.6533	113.027	109.313	128.738	130.443	108.948	148.445	140.761	88.7879	96.0404	68.4293	81.2839	94.782	72.0954
NLRC5	2672.01	-0.408459	0.1096	-3.72682	0.000193909	0.00152371	674.209	670.187	608.389	669.913	5876.19	5738.74	4839.29	4874.26	461.463	530.565	411.567	4482.06	3987.43	3583.84
TMEM238	81.8101	0.834466	0.223953	3.72608	0.000194483	0.00152743	76.2499	59.8381	50.1764	59.6008	68.3543	66.9829	68.4494	54.8313	88.7879	103.068	103.14	157.988	105.313	82.5609
ACOT13	495.119	0.352441	0.0946097	3.72521	0.000195155	0.00153112	449.473	444.132	398.723	459.323	455.126	477.758	440.385	419.828	585.299	542.277	544.459	625.084	500.238	589.554
CNNM2	115.923	0.794366	0.213237	3.72527	0.000195106	0.00153112	116.381	103.719	86.0167	91.3879	85.4428	76.6672	84.1186	86.7481	195.1	131.177	133.883	193.479	113.212	125.586
DSTYK	374.863	0.640247	0.17189	3.72475	0.000195506	0.00153307	346.469	378.975	310.018	353.631	285.379	277.616	281.22	248.787	592.309	386.504	510.74	518.614	315.94	441.875
MFSD3	53.685	0.83082	0.223176	3.72272	0.000197088	0.00154467	44.1447	39.8921	43.0083	41.3232	29.0506	36.316	52.7803	40.9189	70.0957	65.5886	78.3465	70.9803	76.3521	62.7928
TRIM2	270.085	1.18691	0.318919	3.72167	0.000197912	0.00154952	187.28	176.855	168.449	166.882	194.24	198.528	142.672	148.126	297.907	333.799	599.004	239.272	271.182	656.998
LOC100299144	28.2769	1.48383	0.398687	3.72178	0.000197822	0.00154952	8.0263	14.6271	17.0241	27.8137	9.68352	14.5264	22.2667	15.5492	31.5431	50.3626	55.5368	30.9108	52.6567	45.3503
PDSS1	166.443	-0.640638	0.172271	-3.71877	0.000200193	0.00156657	220.723	162.228	195.33	212.973	200.506	196.107	178.958	189.045	106.312	161.629	136.859	113.339	152.704	103.492
CDK2AP1	1424.74	-0.472361	0.127036	-3.71832	0.000200551	0.00156855	1621.31	1712.7	1640.59	1635.45	1554.49	1658.43	1609.8	1518.91	995.359	1420.69	1148.42	939.916	1341.43	1148.88
CALU	5546.48	0.362929	0.0976121	3.71807	0.000200749	0.0015693	4447.91	4660.72	4880.55	5256.79	4761.44	4934.95	5125.46	5069.03	6069.12	5939.28	7321.93	5794.05	6195.06	7194.42
INTS10	1390.17	-0.215344	0.0579205	-3.71793	0.000200863	0.00156937	1467.48	1531.85	1409.42	1424.86	1503.79	1519.62	1467.95	1414.16	1355.18	1302.4	1249.58	1315.43	1270.34	1230.27
HIST1H1C	74.4435	1.71455	0.461324	3.71659	0.000201928	0.00157687	60.1973	34.5731	34.0483	40.5285	29.6202	56.4916	37.1111	25.3697	126.172	48.0202	185.453	127.078	52.6567	184.89
XRN2	2750.83	-0.234829	0.0632048	-3.71537	0.00020291	0.00158373	2719.58	2813.72	2623.51	2542.97	3417.71	3420.97	3141.25	3109.02	2175.3	2184.33	2017.18	2810.59	2884.27	2651.25
CNOT9	1245.33	-0.312886	0.0842791	-3.7125	0.000205226	0.00160097	1332.37	1301.81	1487.37	1412.14	1316.96	1296.08	1393.73	1384.7	1109.85	1144.29	998.671	1107.06	1182.14	967.474
ALDH1A1	1841.6	0.99002	0.266715	3.7119	0.000205708	0.00160391	1185.22	1327.08	1554.57	1540.08	1026.45	1008.78	1382.18	1371.6	2005.9	2238.21	4009.56	1625.68	2002.27	3504.77
DMBT1	409.546	3.0408	0.81944	3.71083	0.000206577	0.00160985	38.7938	37.2326	195.33	137.479	44.9999	42.7722	154.217	147.308	247.671	832.74	1453.87	240.417	809.596	1351.21
GGCT	324.415	-0.548042	0.1477	-3.71051	0.000206845	0.00161111	468.201	436.153	364.675	357.605	367.974	384.95	356.267	278.249	268.7	301.005	244.957	226.679	261.967	224.426
BCL6B	25.0526	1.54442	0.416256	3.71026	0.000207044	0.00161132	16.0526	29.2542	28.6722	27.8137	9.68352	7.26321	14.0198	13.094	17.5239	48.0202	43.6361	25.1866	26.3283	44.1875
APELA	8.6934	3.94148	1.06233	3.71021	0.000207086	0.00161132	1.33772	1.32974	1.79201	0	1.13924	2.42107	0.824692	1.63676	2.33652	32.7943	6.9421	5.72422	55.2895	8.1398
AP1AR	252.624	-0.430291	0.11598	-3.71004	0.000207231	0.00161162	228.75	236.693	248.194	278.932	328.67	341.371	290.291	288.069	192.763	197.937	208.263	211.796	250.119	234.891
GUK1	974.114	0.470897	0.126938	3.70966	0.000207534	0.00161314	941.753	848.371	767.878	715.209	891.454	902.252	790.055	824.925	1211.49	958.061	1243.63	1314.28	1018.91	1209.34
YIPF3	741.579	0.380364	0.10255	3.70907	0.00020802	0.00161425	753.135	708.749	672.005	649.251	669.872	646.426	675.422	622.786	862.177	716.789	854.87	963.958	742.459	844.214
GLCCI1	363.742	0.4432	0.119487	3.7092	0.000207918	0.00161425	314.363	295.201	330.627	357.605	305.316	304.248	302.662	306.073	403.05	425.154	506.773	381.233	375.179	484.9
TCP11L2	28.7464	1.69889	0.458048	3.70897	0.000208104	0.00161425	16.0526	14.6271	21.5042	4.76806	13.6709	12.9124	9.07161	16.3676	53.74	33.9655	79.3383	48.0834	23.6955	54.653
SELENOO	303.135	0.708434	0.190992	3.70924	0.000207884	0.00161425	266.206	184.833	253.57	219.331	224.43	247.756	237.511	261.063	475.482	317.402	368.923	494.572	286.979	405.827
AK3	1745.04	0.358597	0.0967329	3.70708	0.000209659	0.00162548	1405.94	1513.24	1490.96	1539.29	1654.17	1791.59	1548.77	1535.28	1782.77	1859.9	2029.08	1845.49	2024.65	2409.38
PATL1	1237.39	-0.266602	0.0719331	-3.70625	0.000210349	0.00162915	1361.8	1251.28	1337.74	1379.56	1347.15	1288.01	1472.07	1366.69	1075.97	987.342	1045.28	1223.84	1101.84	1084.92
PSMG3	357.951	-0.445304	0.120148	-3.70629	0.000210316	0.00162915	416.03	422.856	393.347	376.677	421.518	430.95	390.079	375.636	328.281	296.32	265.783	301.094	346.217	246.52
MTERF2	71.7048	0.653275	0.1763	3.70547	0.000210998	0.00163334	56.1841	69.1462	66.3045	65.1635	57.5315	53.2635	65.1506	51.5578	75.937	87.8418	87.2721	78.9942	89.5163	100.003
HS1BP3	506.066	0.418001	0.112839	3.70442	0.000211879	0.00163711	460.175	448.121	497.284	503.031	395.316	372.845	502.237	443.561	554.924	618.406	574.211	536.932	547.629	630.253
LOC101906008	144.274	0.738563	0.199358	3.70471	0.000211634	0.00163711	104.342	136.963	85.1207	83.4411	115.063	140.422	129.477	115.391	137.855	152.259	193.387	162.568	235.639	227.915
MRPS11	309.089	-0.385536	0.10407	-3.70458	0.000211745	0.00163711	342.455	361.688	318.979	340.122	349.746	326.037	320.805	360.086	265.195	306.861	254.874	267.893	276.447	236.054
KIF15	496.864	-0.871055	0.235146	-3.70431	0.000211965	0.00163711	600.635	581.094	586.885	632.563	636.264	632.706	683.669	603.145	268.7	456.777	224.131	288.501	502.871	258.148
EZH2	2080.32	-0.557147	0.150408	-3.70424	0.000212027	0.00163711	2247.36	2248.58	2649.49	2724.15	2253.41	2145.07	2564.79	2485.41	1473.18	2054.33	1460.82	1381.83	1952.25	1483.77
TUBGCP2	1223.03	-0.321907	0.0869136	-3.70376	0.000212426	0.00163935	1507.61	1413.51	1289.35	1285.79	1351.71	1400.99	1355.79	1274.21	1097	1004.91	911.398	1134.54	1097.89	997.707
VILL	497.09	0.561223	0.151567	3.70281	0.000213225	0.00164467	541.775	478.705	404.099	375.882	426.645	415.617	341.422	388.73	557.261	558.674	729.912	579.291	514.719	646.533
GPX2	26.2012	2.35721	0.637051	3.70018	0.000215443	0.00166094	18.728	9.30815	9.85608	10.3308	3.98733	9.68428	8.24692	9.00216	10.5144	70.2735	89.2556	14.883	43.4417	59.3043
MAP9	119.58	0.614644	0.166165	3.699	0.000216453	0.00166787	112.368	94.4112	82.4327	89.0038	87.1517	96.8428	86.5926	90.0216	164.725	148.745	208.263	124.788	132.958	155.819
SERBP1	12654.3	-0.372911	0.100863	-3.69719	0.000218001	0.00167894	13515	14418.3	14051.2	14512.4	13505.7	14037.4	14426.3	13750.4	9889.33	12624.6	10156.3	9314.45	12147.9	10810.8
XPO7	1790.33	-0.2271	0.0614383	-3.69639	0.000218691	0.0016834	1974.47	2131.57	1930.9	1976.36	1810.82	1868.26	1792.06	1786.52	1740.71	1739.27	1659.16	1459.68	1679.75	1515.17
HAUS8	365.424	-0.612381	0.16572	-3.69528	0.000219647	0.00168989	472.214	499.98	445.316	400.517	464.809	473.723	357.916	360.905	308.421	278.751	239.998	335.439	259.334	218.612
GINS4	263.614	-0.501021	0.135609	-3.69459	0.000220243	0.00169362	350.482	320.466	309.122	309.129	306.455	318.774	283.694	266.791	203.277	230.731	166.61	204.927	242.221	177.913
GRK4	456.364	-0.591148	0.160046	-3.69361	0.000221091	0.00169927	576.556	559.818	468.612	526.871	597.53	553.618	478.321	456.655	419.406	421.641	289.585	358.336	394.925	287.219
LRP11	343.102	0.497723	0.134805	3.69216	0.000222356	0.00170812	317.039	325.785	268.802	317.871	288.227	280.844	260.603	273.338	447.444	354.881	500.823	376.653	342.268	448.852
ZFP41	172.25	-0.659489	0.178709	-3.69029	0.000223999	0.00171987	223.399	219.406	202.498	183.57	228.417	201.756	178.133	165.312	181.081	140.547	119.007	139.671	126.376	102.329
XAF1	97.637	1.17257	0.317848	3.6891	0.000225045	0.00172702	13.3772	10.6379	5.37604	12.7148	143.544	146.071	78.3457	92.4767	33.8796	25.7669	25.7849	368.64	157.97	252.334
ENTPD4	2147.84	0.21926	0.059454	3.68789	0.000226118	0.00173437	1832.67	1869.61	2019.6	2051.86	1936.13	2078.89	2032.86	2014.03	2495.41	2356.5	2347.42	2290.83	2289.25	2454.73
SLC29A3	532.981	0.369066	0.100097	3.68706	0.000226858	0.00173917	583.245	521.256	490.116	442.635	485.315	430.95	460.178	450.108	658.899	572.729	596.029	612.491	564.743	593.043
NDUFB1	513.462	0.391451	0.10624	3.6846	0.000229065	0.0017552	438.771	514.607	387.075	394.16	517.784	501.161	446.983	455.018	580.626	525.88	534.542	660.575	626.614	604.671
SMYD2	425.903	-0.390541	0.106014	-3.68386	0.000229731	0.0017594	425.394	514.607	444.42	452.171	469.936	515.688	428.015	461.565	410.06	422.812	345.122	373.219	355.432	344.197
CCDC115	711.318	-0.423481	0.114973	-3.6833	0.000230233	0.00176236	782.564	957.409	731.142	731.898	816.264	822.357	745.521	742.269	661.236	638.317	581.153	658.285	562.11	527.924
ATG4A	140.073	0.517419	0.140518	3.68223	0.000231199	0.00176885	129.759	117.017	122.753	133.506	105.949	115.404	105.561	126.849	177.576	166.314	175.536	154.554	139.54	190.704
STX3	77.3662	1.46976	0.399189	3.68185	0.000231544	0.0017706	60.1973	45.211	30.4642	30.9924	63.7973	54.0706	20.6173	31.0984	106.312	103.068	183.47	127.078	69.7701	156.982
MCMBP	2412.39	-0.350885	0.0953069	-3.68163	0.000231749	0.00177126	2391.84	2537.13	2576.92	2762.3	2595.18	2822.16	2836.11	2681.82	1862.21	2308.48	1967.59	1878.69	2316.89	2236.12
ARHGEF3	94.5173	0.829764	0.225432	3.68077	0.000232532	0.00177635	44.1447	43.8813	47.4884	61.9848	76.8986	79.8953	87.4173	92.4767	75.937	121.807	142.809	114.484	161.919	172.099
TMEM168	808.069	-0.426217	0.115823	-3.67989	0.00023333	0.00178155	889.582	901.56	896.007	948.845	804.302	913.55	922.83	901.034	658.899	777.693	720.987	518.614	745.092	713.977
PI3	8.11309	3.14631	0.855241	3.67885	0.000234285	0.00178725	1.33772	5.31894	2.68802	1.58935	0.569619	2.42107	0.824692	2.45513	19.8604	4.6849	31.7353	22.8969	7.8985	9.30263
BOLA-DMA	212.731	0.847951	0.230495	3.67882	0.000234314	0.00178725	92.3025	90.422	81.5367	61.9848	290.506	271.967	161.64	152.218	209.119	196.766	184.461	462.517	364.647	358.151
HES2	865.16	0.884385	0.240447	3.67808	0.000234994	0.00179073	856.139	767.257	576.133	500.647	671.581	719.865	505.536	498.392	1371.54	881.932	1446.93	1342.9	778.002	1195.39
WBP11	3837.07	-0.35688	0.0970326	-3.67794	0.000235126	0.00179073	3813.83	3967.93	4292.77	4201.46	4147.96	4218.31	4617.45	4424.97	3072.53	3641.34	3122.95	3007.5	3908.44	3281.5
DUS3L	232.058	-0.484182	0.131645	-3.67794	0.000235123	0.00179073	271.557	279.244	257.154	212.973	264.873	309.09	263.077	261.063	178.744	199.108	162.643	194.623	213.259	181.401
RITA1	243.727	0.430022	0.116948	3.67704	0.000235952	0.00179612	264.868	240.682	249.986	253.502	185.126	216.282	176.484	166.949	300.243	283.436	323.303	266.749	226.424	258.148
ASF1B	486.676	-0.538509	0.146479	-3.67635	0.000236599	0.00179988	592.609	647.581	677.381	641.304	485.315	460.81	566.563	509.849	385.526	474.346	326.279	321.701	426.519	297.684
ENHO	31.3759	1.06049	0.288471	3.67625	0.000236685	0.00179988	20.0658	17.2866	17.9201	20.6616	15.9493	22.5967	24.7408	22.9146	44.3939	35.1367	64.4624	44.6489	40.8089	47.676
LOC112443139	213.503	-0.771895	0.210021	-3.67532	0.00023755	0.00180555	295.635	249.99	189.058	179.597	342.341	334.915	255.654	266.791	125.004	111.266	112.065	228.969	150.071	147.679
PAK6	222.67	1.27244	0.346299	3.67441	0.000238404	0.00181112	207.346	184.833	104.833	95.3613	181.139	193.686	75.8716	93.2951	362.161	261.183	370.906	402.985	239.588	344.197
SIRT5	502.101	-0.345432	0.0940318	-3.67357	0.000239188	0.00181617	600.635	570.456	521.476	503.031	578.163	562.495	522.855	537.674	490.67	421.641	420.493	457.937	418.62	423.27
KCTD17	451.344	0.403613	0.109898	3.67262	0.000240073	0.00182197	450.811	408.229	352.131	372.704	383.923	421.266	406.573	379.727	563.102	459.12	544.459	574.711	485.758	516.296
ROM1	123.449	0.702772	0.191365	3.67242	0.000240266	0.00182252	133.772	103.719	102.145	92.1826	91.7086	85.5445	102.262	108.026	115.658	152.259	169.586	157.988	125.06	188.378
LACTB2	183.654	-0.550761	0.150007	-3.67157	0.000241064	0.00182766	189.956	253.979	191.746	165.293	220.443	189.65	222.667	220.962	147.201	163.971	167.602	141.961	152.704	143.028
LRRC8D	827.283	-0.272091	0.0741356	-3.67018	0.000242384	0.00183674	889.582	953.42	855.687	828.848	897.719	967.621	876.647	871.573	691.611	746.07	757.681	729.265	776.686	739.559
NDC1	1060.34	-0.673273	0.183479	-3.66948	0.00024304	0.00184079	1177.19	1220.7	1212.3	1294.53	1233.22	1346.92	1257.65	1229.2	663.573	1132.57	692.226	629.664	1018.91	736.071
AP3S1	468.956	0.610182	0.166319	3.66875	0.000243743	0.00184457	298.311	355.039	387.971	399.723	362.847	375.266	406.573	444.379	495.343	529.393	693.218	526.628	527.883	762.816
DCAF5	981.762	0.423473	0.115429	3.6687	0.000243784	0.00184457	898.946	868.317	941.704	855.073	821.39	842.532	862.627	853.568	1203.31	999.054	1201.97	1273.07	895.163	1227.95
ABLIM3	2390.39	0.275179	0.075021	3.66803	0.000244425	0.0018485	2288.83	2465.33	2211.35	2162.32	2161.7	2158.79	2094.72	2194.89	2789.81	2432.63	2693.53	2792.27	2366.92	2652.41
FOXM1	715.703	-0.683095	0.186272	-3.66718	0.000245239	0.00185372	904.297	812.468	1047.43	970.301	708.606	702.917	890.667	923.949	459.127	676.968	415.534	494.572	609.501	403.502
CEBPD	667.065	0.469687	0.128095	3.66671	0.000245688	0.00185526	501.644	400.25	514.308	450.582	658.479	639.162	650.682	735.722	602.823	603.18	796.358	976.551	805.647	1003.52
TUBG1	697.723	-0.38468	0.104909	-3.66679	0.00024561	0.00185526	757.148	809.809	719.494	755.738	800.315	761.023	780.983	769.275	570.112	727.33	527.6	590.739	645.044	553.507
[truncated: 16,737 more rows]

## Sheet: MER41_BT.IFNAR2
gene	baseMean	log2FoldChange	lfcSE	stat	pvalue	padj	MDBK_Cas12_ctrl_BSA_R1	MDBK_Cas12_ctrl_BSA_R2	MDBK_Cas12_MER41_IFNAR2_ctrl_BSA_R1	MDBK_Cas12_MER41_IFNAR2_ctrl_BSA_R2	MDBK_Cas12_ctrl_IFNG_4h_R1	MDBK_Cas12_ctrl_IFNG_4h_R2	MDBK_Cas12_MER41_IFNAR2_ctrl_IFNG_4h_R1	MDBK_Cas12_MER41_IFNAR2_ctrl_IFNG_4h_R2	MDBK_Cas12_MER41_IFNAR2_KO2_BSA_R1	MDBK_Cas12_MER41_IFNAR2_KO2_BSA_R2	MDBK_Cas12_MER41_IFNAR2_KO3_BSA_R1	MDBK_Cas12_MER41_IFNAR2_KO3_BSA_R2	MDBK_Cas12_MER41_IFNAR2_KO2_IFNG_4h_R1	MDBK_Cas12_MER41_IFNAR2_KO2_IFNG_4h_R2	MDBK_Cas12_MER41_IFNAR2_KO3_IFNG_4h_R1	MDBK_Cas12_MER41_IFNAR2_KO3_IFNG_4h_R2
DUSP1	1743	1.37398	0.109543	12.5428	4.35155e-36	5.37896e-32	1504.79	1199.84	1094.9	973.855	967.607	811.599	840.191	874.977	2559.55	2405.32	2951.63	2640.19	2066.18	2233.88	2355.59	2407.87
TRIB1	2105.7	0.739944	0.0661805	11.1807	5.06888e-29	3.13282e-25	1493.34	1329.36	1616.46	1539.46	1605.14	1629.27	1491.61	1469.18	2780.26	2573.21	2993.85	2817.65	2412.78	2689.15	2563.85	2686.61
HES1	1833.51	1.33303	0.125402	10.6301	2.15818e-26	8.8924e-23	1434.63	1310.85	1037.37	938.984	1119.2	1019.92	791.446	880.275	3030.68	2750.6	2787.55	2625.4	2314.49	2582.5	2169.99	2542.36
SOX9	276.787	1.08622	0.109351	9.93333	2.98119e-23	9.21262e-20	197.584	209.224	258.864	214.333	128.974	173.604	139.146	170.404	423.622	416.021	428.927	375.62	322.808	325.679	305.374	338.403
RPA1	3581.7	-0.365663	0.0371492	-9.84309	7.34171e-23	1.81502e-19	3881.53	4103.35	4007.6	4018.75	3917.5	3896.54	4158.42	4064.1	3288.02	3172.95	3201.12	3153.83	3125.65	3237.3	3132.51	2948.01
KLF6	8771.96	0.597434	0.0620379	9.63013	5.96518e-22	1.22893e-18	6374.24	5841.19	5662.41	5772.54	8506.14	7790.48	7079.59	7066.92	10466.8	10100.7	10000.6	9614.3	11436.9	12002	10859.7	11776.8
CSRNP1	515.878	0.777063	0.0811663	9.57372	1.03131e-21	1.82115e-18	430.963	348.707	369.121	337.66	408.314	373.249	410.347	384.072	635.432	668.379	616.043	567.867	691.139	735.071	631.25	646.436
PERP	1258.3	-0.560271	0.0610335	-9.17972	4.32221e-20	6.67836e-17	1592.13	1537.16	1387.32	1517.34	1410.15	1565.04	1348.91	1483.31	1110.52	1136.14	1032.5	1074.61	1000.5	1030.93	943.099	963.146
MDM2	3438.65	-0.696443	0.0772902	-9.01076	2.04641e-19	2.81063e-16	3930.21	4237.14	4346.04	4615.82	4048.3	4247.22	4203.62	4144.44	2574.39	2543.64	2871.03	2987.22	2343.46	2302.69	2836.85	2786.4
IER5	1453.82	0.437323	0.051329	8.51999	1.59569e-17	1.97244e-14	1373.07	1438.95	1391.15	1325.97	1079.47	1037.28	1165.46	1123.08	1774.66	1742.22	1922.97	1925.42	1513.68	1495.37	1476.15	1476.17
JUN	3557.18	0.431592	0.052241	8.26156	1.43785e-16	1.61575e-13	3616.65	3223.76	3264.56	3125.69	2830.08	2706.49	2856.47	2983.4	4168.91	4484.37	4213.46	4098.3	3978.19	3955.17	3743.26	3666.03
HEY1	287.874	0.756856	0.0945798	8.0023	1.22115e-15	1.25788e-12	167.517	150.869	190.792	187.116	253.668	257.802	259.679	236.623	268.228	272.42	333.93	323.369	432.479	463.29	391.699	416.496
RHOV	89.242	1.41617	0.178013	7.95542	1.78525e-15	1.6975e-12	34.3625	39.8522	36.4327	45.078	54.4012	44.269	47.859	55.6242	118.772	108.757	150.652	149.854	108.637	161.693	118.697	152.932
SESN2	313.708	-0.670689	0.0846606	-7.92209	2.33554e-15	2.06211e-12	423.804	436.951	384.461	421.862	353.913	355.02	350.08	367.296	248.432	253.414	274.437	254.357	208.997	199.536	255.737	231.025
CD244	72.9304	-2.1554	0.283944	-7.59094	3.176e-14	2.61723e-11	128.859	119.557	76.7005	92.7076	159.536	151.904	98.3768	109.482	27.7136	39.068	33.5849	12.8164	40.351	27.5222	19.4231	29.2848
ABHD8	465.357	-0.93688	0.123922	-7.56026	4.02269e-14	3.10778e-11	745.952	627.672	612.645	577.509	593.523	571.157	574.308	603.92	273.177	315.712	364.636	361.818	263.833	251.14	332.351	376.365
DYRK3	405.872	-0.618875	0.083776	-7.38726	1.49887e-13	1.05486e-10	588.457	582.127	490.883	506.064	474.329	477.411	413.892	432.632	354.338	332.606	332.97	335.199	281.422	288.983	290.267	312.372
XPC	876.877	-0.468969	0.063519	-7.38313	1.54605e-13	1.05486e-10	1009.4	972.109	976.014	931.329	1125.31	1077.21	989.086	1018.89	661.166	718.006	720.636	783.775	710.798	776.355	792.03	767.914
DCLRE1B	1306.33	-0.422038	0.0572115	-7.3768	1.62141e-13	1.05486e-10	1473.29	1490.19	1569.48	1501.18	1470.67	1440.05	1474.77	1396.78	1214.45	1137.2	1192.74	1223.48	997.393	1028.64	1216.1	1074.86
GADD45A	644.758	0.810558	0.112103	7.23046	4.81344e-13	2.97494e-10	622.82	472.533	488.007	541.787	461.493	419.254	451.115	481.193	692.839	706.392	932.7	865.603	720.109	730.484	875.118	854.684
SLC1A1	980.656	0.438117	0.0618842	7.07963	1.44541e-12	8.50797e-10	891.993	943.643	770.84	811.404	894.257	897.533	804.74	849.372	1057.07	1086.51	1012.34	997.711	1161.9	1176.57	1166.46	1168.14
SAT1	935.788	0.732422	0.10467	6.99744	2.60682e-12	1.46468e-09	614.229	542.274	478.419	494.157	1156.48	1011.24	897.799	823.767	582.975	569.126	685.132	646.737	1491.95	1576.79	1655.28	1746.24
RPS4Y1	2861.33	-0.401485	0.0577138	-6.95649	3.48848e-12	1.87483e-09	3318.84	3499.88	3178.28	3166.52	3208.45	3322.78	3273.02	3244.74	2229.95	2243.77	2631.14	2585.96	2410.71	2420.8	2578.95	2467.52
GDF15	53.306	-1.64273	0.237226	-6.92473	4.3681e-12	2.24975e-09	64.4296	78.2811	67.1129	66.3412	100.245	105.03	68.2434	70.6339	24.7443	26.3973	40.3019	30.5623	20.6928	20.6416	34.5299	34.708
PLAU	7508.54	0.282028	0.040983	6.8816	5.91844e-12	2.92632e-09	6528.87	6434.71	6462.97	6758.3	7199.9	6947.63	7277.23	7338.86	7176.82	7156.83	7926.99	7953.1	8544.06	8766.96	8774.92	8888.49
CACNA2D1	1663.27	0.530943	0.0786897	6.7473	1.50624e-11	7.16101e-09	1245.64	1229.72	1405.54	1436.54	1353.92	1549.42	1403.86	1346.46	1878.58	1819.3	1890.35	1886.97	1864.42	1843.99	2138.7	2318.93
NUAK2	1039.21	0.587076	0.0877406	6.69105	2.21578e-11	9.78186e-09	668.637	616.286	828.365	830.966	889.367	861.944	1006.81	1025.07	1043.22	1028.44	1071.84	1076.58	1354.34	1434.59	1387.67	1503.29
FOXP4	1796.05	-0.458939	0.0685789	-6.69213	2.19946e-11	9.78186e-09	2183.45	2260.19	1926.14	1971.53	2196.83	2319.35	1924.11	1928.3	1496.53	1480.36	1519	1440.37	1558.17	1520.6	1485.87	1526.07
LOC100139115	687.002	-0.427329	0.0647438	-6.6003	4.10315e-11	1.74893e-08	847.608	858.245	802.479	756.97	809.294	811.599	748.018	733.709	588.913	589.188	550.792	586.599	623.888	560.764	575.139	548.82
IFNGR2	904.751	-0.348664	0.0533405	-6.53657	6.29471e-11	2.59363e-08	897.72	986.342	1010.53	936.432	989.612	1059.85	981.11	1026.84	842.294	838.378	830.027	892.222	792.534	808.464	819.007	764.66
B3GNT2	749.411	0.449586	0.0690939	6.50688	7.67282e-11	3.05948e-08	502.551	456.877	561.831	567.303	696.213	762.122	747.132	780.504	732.43	711.671	747.504	652.653	999.462	972.45	1042.37	1057.51
GPX8	958.552	-0.452013	0.0696866	-6.48636	8.79332e-11	3.30292e-08	1142.55	1151.44	1082.44	1114.19	1091.69	1091.1	1052.9	1081.58	782.908	778.192	871.288	940.53	743.906	721.31	866.486	824.314
ATF4	5706.28	0.292944	0.045166	6.48594	8.81777e-11	3.30292e-08	4880.9	4723.91	5213.71	5406.81	5151	5152.57	5247.65	5279	6246.44	6197.03	6289.01	5993.17	6497.54	6717.7	6102.09	6201.88
LOC104974444	234.757	-0.723062	0.113098	-6.39325	1.62393e-10	5.90392e-08	297.808	360.093	264.617	287.479	300.735	276.03	284.495	266.643	168.261	164.719	186.156	213.936	159.335	191.508	166.175	168.117
DIXDC1	432.084	0.464208	0.0731132	6.34917	2.16478e-10	7.64539e-08	286.354	333.05	300.091	318.098	408.926	455.711	417.437	455.588	385.021	342.109	412.614	406.183	601.126	565.351	619.381	606.305
CCNG1	4384.67	-0.827535	0.130519	-6.34036	2.29232e-10	7.87094e-08	6384.26	6717.94	4892.53	4791.88	6081.32	6557.89	4828.44	4576.19	2983.17	2898.42	3566.72	3453.54	2912.51	2866.89	3417.38	3225.67
HOMER1	221.635	0.98721	0.15591	6.33191	2.42141e-10	8.08947e-08	130.291	155.139	178.329	193.07	109.414	98.9543	143.577	169.521	353.348	329.438	359.838	295.764	251.417	231.645	254.658	291.764
RPS27L	1187.61	-0.651061	0.10316	-6.31116	2.76957e-10	8.92889e-08	1590.7	1588.39	1226.25	1272.39	1603.31	1571.98	1326.76	1335.86	895.742	853.161	1046.89	971.092	881.513	861.215	984.103	992.431
PPP1R15A	313.971	0.703136	0.111458	6.30852	2.81714e-10	8.92889e-08	244.833	217.764	254.07	250.906	246.333	212.665	245.499	258.697	323.655	333.662	451.957	415.056	399.371	372.696	370.118	426.257
MMRN2	37.3978	2.09229	0.334818	6.24905	4.12951e-10	1.27612e-07	10.0224	4.26988	16.2989	17.8611	11.6137	5.20812	18.6118	27.3706	58.3964	44.3475	66.2102	53.2375	58.9745	64.2184	70.1389	71.5852
GADD45B	945.652	0.458653	0.0741467	6.18574	6.181e-10	1.86349e-07	839.017	701.683	871.509	898.158	816.017	740.421	754.222	723.114	1174.86	1176.26	1154.36	1106.16	1001.53	1008	1012.16	1152.96
MOB3B	1241.9	0.360269	0.0585438	6.15383	7.56321e-10	2.22592e-07	1022.28	1039	906.024	927.927	1248.17	1301.16	1157.48	1192.83	1249.09	1213.22	1195.62	1124.89	1605.76	1647.89	1494.5	1544.5
DNAJC21	1325.38	-0.487596	0.0793365	-6.14593	7.94963e-10	2.28524e-07	1489.04	1500.15	1616.46	1624.51	1452.94	1501.68	1566.94	1617.52	1069.94	990.426	1179.31	1221.51	1061.54	969.01	1243.08	1101.98
PRPSAP1	1873.7	0.282353	0.0461162	6.12263	9.20413e-10	2.58573e-07	1477.59	1535.73	1636.6	1584.53	1752.45	1884.47	1829.28	1912.41	1859.78	1940.73	1858.68	1741.06	2256.55	2288.93	2190.49	2229.99
CDKN1A	1558.75	-0.953508	0.15597	-6.11342	9.75198e-10	2.67876e-07	2535.66	2587.55	2092.01	2168.85	1922.38	1997.31	1731.79	1757.02	800.724	931.297	1302.13	1287.56	793.569	774.061	1082.3	1175.73
EGR1	2291.04	0.601597	0.0986937	6.0956	1.0903e-09	2.92982e-07	2194.9	1484.49	1984.62	1857.55	1910.15	1643.16	1982.6	1938.9	2551.63	2674.57	2808.66	2282.31	2856.64	2927.67	2713.84	2844.97
TAF1D	718.4	0.402744	0.0661824	6.08536	1.16228e-09	3.0568e-07	521.164	589.243	581.006	641.299	667.484	622.371	628.371	635.705	822.499	773.969	778.21	851.8	805.984	864.655	806.058	904.576
PLXNB2	8123.49	-0.249152	0.0418113	-5.95895	2.53869e-09	6.53764e-07	9558.5	8677.81	9261.58	8829.34	8484.14	8227.1	8592.46	9118.83	7498.5	7946.64	7447.21	7373.4	7334.56	7276.17	7145.54	7204.07
CLK1	787.967	0.490432	0.0823963	5.95211	2.64707e-09	6.67764e-07	660.046	656.138	697.974	736.558	622.252	536.437	668.253	631.29	1126.36	955.582	979.719	882.363	819.435	893.324	874.039	867.699
ITGA1	5963.64	0.379354	0.0639	5.93668	2.90853e-09	7.19046e-07	4339.69	4304.04	4812.95	4463.57	5960.29	6088.29	5741.31	5891.75	5456.6	5589.89	5934.93	6029.64	6898.98	7296.82	8071.37	8538.16
FAM46A	213.131	-0.758297	0.127901	-5.92877	3.05218e-09	7.39764e-07	294.945	325.934	344.193	338.51	184.597	193.569	214.479	241.038	227.647	212.234	160.248	181.402	124.157	122.703	131.645	112.801
ID1	533.644	0.43345	0.0733822	5.90674	3.48938e-09	8.29466e-07	282.059	338.744	344.193	294.283	635.699	615.426	598.238	614.515	363.246	335.774	403.019	382.522	754.252	830.252	874.039	872.038
IL11	881.085	0.892805	0.152514	5.85391	4.8015e-09	1.11984e-06	733.066	592.09	864.798	848.827	431.542	373.249	651.414	615.398	1346.09	1367.38	1157.24	1273.76	983.942	1036.67	892.383	929.523
FZD6	3674.05	0.317479	0.0543847	5.83765	5.2941e-09	1.21186e-06	3068.28	3236.57	3515.76	3320.46	3017.74	3375.73	3358.99	3498.14	4163.96	4003.94	3896.81	3826.2	4115.8	4217.77	3938.57	4230.03
NEDD9	2074.89	0.244023	0.0420387	5.80473	6.44701e-09	1.44894e-06	1637.94	1579.85	1531.13	1533.5	2156.49	2361.02	2223.67	2352.11	1746.94	1771.79	1757.93	1786.41	2768.7	2753.36	2581.11	2656.24
AEN	1467.11	-0.396433	0.0683757	-5.79786	6.71661e-09	1.47995e-06	1550.61	1598.36	1471.69	1496.93	2006.73	1894.89	1689.25	1643.12	1127.35	1070.67	1219.61	1203.76	1371.93	1311.89	1442.7	1374.22
ARHGAP6	102.885	0.837669	0.144546	5.79519	6.82446e-09	1.47995e-06	80.1791	88.2441	63.2779	89.3055	66.6261	73.7817	68.2434	60.0388	149.455	153.104	138.178	136.051	137.607	119.263	123.013	99.7854
CD44	10666.2	-0.279697	0.0486673	-5.74713	9.07711e-09	1.93452e-06	10819.9	11057.6	11810	12009.5	11453.6	12042	11857.5	11779.1	9990.74	10137.6	9455.59	9424.03	10226.4	10010	9617.67	8968.76
LRP1	7388.56	-0.272374	0.0476114	-5.72078	1.06038e-08	2.22159e-06	8904.18	8243.71	8618.26	8238.22	7888.78	7565.66	7229.37	8128.19	6750.23	6991.06	6918.49	7226.5	6030.92	6283.08	6438.75	6761.55
IFNAR2	2023.73	-0.579611	0.101648	-5.70214	1.1831e-08	2.43739e-06	1381.66	1387.71	1399.78	1440.8	3329.47	3259.42	3094	3187.35	1471.79	1545.83	1164.92	1104.19	2406.57	2366.91	1942.31	1897.01
SBK1	185.928	-1.14823	0.204348	-5.61898	1.92089e-08	3.89248e-06	303.535	361.516	246.4	187.967	281.175	278.635	172.824	197.775	123.721	127.763	154.49	118.306	87.9444	106.648	103.59	122.563
ITGAV	5362.57	0.441844	0.0787265	5.61239	1.99547e-08	3.97839e-06	3696.83	3679.21	4811.04	4518.86	4536.69	4766.3	4878.96	4956.73	6068.28	6216.03	5790.99	5887.68	6244.05	6231.48	6466.81	7051.14
CCT5	6228.89	-0.179098	0.0319619	-5.60347	2.10098e-08	4.12225e-06	6636.25	6848.88	6568.44	6514.2	6869.83	6784.45	6655.95	6508.03	5717.9	5652.19	5504.08	5709.23	6111.62	5980.34	5930.52	5670.41
ZSCAN26	154.694	0.799383	0.143268	5.57961	2.41052e-08	4.65569e-06	97.3604	111.017	102.587	125.878	103.912	81.5939	130.283	140.385	194.985	175.278	206.307	213.936	191.408	206.416	203.942	189.809
DDIAS	709.329	-0.539849	0.0970012	-5.56539	2.61574e-08	4.97433e-06	930.65	926.563	761.252	775.682	875.92	905.345	782.583	738.124	553.281	551.176	643.87	632.935	576.294	505.72	625.855	564.004
CARMIL1	1111.65	0.350928	0.0632478	5.54846	2.88191e-08	5.39747e-06	937.809	896.674	1038.33	1026.59	962.717	918.365	961.611	1069.22	1232.26	1203.72	1288.7	1262.91	1178.45	1201.8	1293.79	1313.48
EIF4A2	2633.99	0.331543	0.0598946	5.53544	3.10447e-08	5.72752e-06	2058.89	2152.02	2279.92	2450.37	2531.18	2216.06	2386.75	2401.55	2780.26	3034.63	2932.44	2914.26	3000.46	3057.25	2804.48	3143.24
DAAM1	600.597	0.412604	0.0747403	5.5205	3.38029e-08	6.14468e-06	473.916	461.147	500.471	490.755	500.002	506.056	624.826	573.9	683.931	629.311	604.528	632.935	750.114	741.952	695.994	739.714
SMAD1	940.893	0.429888	0.0780182	5.5101	3.58634e-08	6.33297e-06	469.621	570.74	588.676	528.178	1024.45	1059.85	1185.84	1168.99	604.749	622.976	633.315	621.105	1557.13	1646.74	1336.96	1434.96
UHRF1BP1L	1202.73	0.328731	0.0596488	5.51111	3.56575e-08	6.33297e-06	1030.87	1124.4	1143.8	1160.97	939.49	1092.84	1050.24	1115.13	1363.9	1334.65	1272.39	1353.61	1275.71	1301.57	1315.37	1368.8
CA2	1644.39	0.576004	0.105096	5.48073	4.23583e-08	7.28905e-06	1350.16	1229.72	1452.52	1536.05	1031.18	1159.68	1359.55	1434.75	2287.36	2216.32	1964.24	1864.3	2016.51	1926.55	1729.73	1751.67
LOC100848315	978.549	0.502492	0.0916903	5.48031	4.2457e-08	7.28905e-06	787.473	721.609	683.593	807.152	1037.29	782.086	810.058	789.333	1107.55	1119.25	1136.13	1021.37	1183.63	1264.87	1111.43	1293.96
TNRC6A	2158.57	-0.223357	0.0409064	-5.4602	4.75609e-08	8.05342e-06	2362.42	2413.9	2275.13	2426.56	2275.68	2320.22	2258.24	2183.47	2119.1	2140.29	1996.86	2025	2002.03	1854.31	1922.89	1961
CCND1	574.969	-0.458599	0.0843399	-5.43751	5.40297e-08	9.02515e-06	502.551	586.397	598.264	628.541	761.005	798.579	736.497	756.665	390.959	443.475	365.596	409.14	596.987	608.928	493.131	522.789
MANEA	433.251	0.334853	0.0623202	5.3731	7.73926e-08	1.27553e-05	325.012	327.357	327.895	324.902	449.268	446.162	471.5	478.544	371.164	366.394	345.445	374.634	599.056	560.764	608.59	555.327
INSR	651.182	0.361933	0.067465	5.36475	8.10623e-08	1.31844e-05	605.639	577.857	625.109	678.722	536.677	500.848	585.83	581.846	757.174	710.615	712	714.763	677.689	708.696	700.31	745.137
LDHB	8098.12	-0.238239	0.0445838	-5.34363	9.11053e-08	1.46254e-05	9141.85	9316.87	8407.33	8322.42	8907.73	9094.25	8344.31	8288.88	7535.12	7480.99	7602.66	7759.86	7164.88	7385.12	7448.75	7368.94
TMEM106C	1071	0.582785	0.109409	5.32665	1.00043e-07	1.58542e-05	902.015	826.933	960.673	927.076	830.687	810.731	796.764	797.28	1578.68	1482.47	1274.31	1101.23	1333.65	1341.71	993.815	1177.9
RTL4	144.61	-0.734282	0.137942	-5.32311	1.02009e-07	1.59611e-05	125.996	130.943	136.143	153.095	215.16	245.65	166.62	190.711	113.824	133.042	104.593	105.489	130.365	129.584	127.329	105.209
ZNFX1	2422.14	-0.33717	0.0635117	-5.30878	1.1036e-07	1.68414e-05	1192.66	1216.92	1120.79	1194.14	4573.37	4530.2	3695.78	3987.28	983.831	957.694	986.436	1021.37	3230.15	3294.63	3389.33	3379.69
LGR4	2728.15	0.381452	0.0718261	5.31078	1.09158e-07	1.68414e-05	2405.37	2475.11	2717.11	2720.84	2030.57	2186.54	2248.49	2250.57	3593.86	3591.09	3024.56	3057.21	3009.77	2928.82	2664.2	2746.27
SGK3	986.208	0.378258	0.0717581	5.2713	1.35463e-07	2.04202e-05	664.341	680.334	766.046	804.6	1007.34	1065.93	1017.45	1000.35	866.049	757.074	888.56	945.459	1326.41	1252.26	1352.06	1385.06
SLAMF7	22.1412	-3.96126	0.758239	-5.22428	1.74831e-07	2.60373e-05	50.1119	54.0851	13.4226	8.50529	83.1299	78.1218	17.7256	21.1902	5.93862	6.33535	0.959568	1.97176	6.20784	1.14676	3.23718	2.16925
EHD2	2928.4	-0.494291	0.0949125	-5.20787	1.91025e-07	2.81103e-05	4054.77	4062.08	3331.68	3123.99	3243.9	3457.32	2914.08	3082.29	2785.21	2808.67	2531.34	2444	2397.26	2473.56	2107.4	2036.92
CPD	6178.33	0.303719	0.0583774	5.20267	1.96442e-07	2.85673e-05	5320.46	5343.04	6139.87	5718.1	5151.61	5518	5424.91	5558.88	7215.42	7544.35	6653.65	6541.31	6542.03	6996.37	6410.7	6774.56
RPL37	4572.86	-0.290393	0.0560497	-5.18099	2.20707e-07	3.17228e-05	5339.07	5569.34	4792.82	4645.59	5099.04	4954.66	4885.16	5019.42	4251.06	4105.31	4037.86	4144.64	4180.98	4295.75	3996.84	3848.25
ECM2	84.2012	1.43366	0.277209	5.17176	2.31894e-07	3.29477e-05	15.7495	28.4658	52.7316	45.9285	32.3962	32.9848	62.9257	73.2826	121.742	112.98	125.703	101.546	125.191	116.969	142.436	156.186
JAK2	2502.84	0.318	0.0615729	5.16461	2.40935e-07	3.38432e-05	1845.55	2043.85	2302.93	2150.14	2220.67	2483.41	2457.65	2585.2	2477.39	2426.44	2534.22	2375.97	3071.85	3041.2	3019.21	3009.83
CLIP1	1844.58	0.372574	0.0722822	5.15443	2.544e-07	3.50754e-05	1275.71	1286.66	1474.57	1401.67	1926.05	2006.86	1832.82	1921.24	1732.1	1651.41	1559.3	1491.64	2618.67	2739.6	2220.71	2374.24
WNT2B	81.8529	1.12972	0.219206	5.15371	2.55383e-07	3.50754e-05	70.1567	56.9317	64.2366	49.3307	48.8999	53.8173	38.9962	46.7949	99.9668	101.366	143.935	122.249	78.6326	75.686	112.222	146.424
AIF1L	1271.9	0.269053	0.0522762	5.14675	2.65035e-07	3.60011e-05	1060.94	1070.32	1083.39	1044.45	1227.39	1199.6	1305.49	1312.91	1319.36	1258.62	1186.99	1204.75	1577.83	1590.55	1470.76	1437.13
BHLHE40	2600.1	0.546936	0.106321	5.14419	2.68682e-07	3.60998e-05	2439.74	2304.31	2860.93	2853.52	1441.94	1681.36	1959.56	2044.85	3364.23	3167.68	3655	3421.99	2343.46	2512.55	2640.46	2910.05
TJP2	1080.3	0.285284	0.0555389	5.13665	2.79674e-07	3.71726e-05	900.583	855.399	861.922	910.916	1098.41	1096.31	973.133	1033.02	1054.11	1085.46	1115.98	1175.17	1256.05	1217.86	1318.61	1331.92
RPN1	4402.75	-0.206826	0.0403758	-5.12253	3.01461e-07	3.96421e-05	4840.81	4987.22	4614.49	4619.22	4706.62	4787.13	4656.5	4550.59	4281.75	4138.04	4017.71	4040.14	4249.27	4132.91	3920.23	3901.39
TIMP3	1013.31	-0.440031	0.0860829	-5.11171	3.19249e-07	4.15393e-05	1312.93	1430.41	1119.83	1126.95	1219.44	1147.52	1034.29	1018.89	840.315	857.384	914.469	929.685	801.846	764.887	840.588	853.599
LGALS3BP	2695.31	-0.190802	0.0375061	-5.08723	3.63335e-07	4.67831e-05	2688.86	2618.86	2652.88	2468.23	3132.65	3165.67	3217.19	3322.44	2148.79	2163.52	2168.62	2134.43	2881.47	2858.87	2692.26	2810.26
ALS2CL	197.536	-0.811701	0.16034	-5.06237	4.1407e-07	5.27662e-05	293.513	244.806	252.153	222.838	289.732	241.31	221.569	254.282	105.905	119.316	163.127	177.458	129.33	123.85	145.673	175.709
ZFP36L1	959.493	0.430489	0.0852102	5.05208	4.37014e-07	5.51218e-05	727.339	754.345	844.664	807.152	973.72	821.147	941.227	886.455	966.016	998.874	834.824	909.967	1311.92	1329.09	1056.4	1188.75
PCGF5	2032.08	0.510121	0.101134	5.044	4.55891e-07	5.69219e-05	1038.03	1070.32	1377.73	1389.76	1867.98	2012.94	2274.19	2368	1819.2	1688.37	1739.7	1734.16	2946.65	2761.39	3034.32	3390.53
LOC112443559	73.8085	0.879142	0.174811	5.02911	4.9275e-07	6.09088e-05	51.5437	37.0056	47.9378	51.8822	67.8486	48.6091	47.859	52.9754	113.824	69.6889	92.1186	95.6304	96.2215	105.502	103.59	98.7008
FADS1	556.093	0.438649	0.0873974	5.01902	5.19364e-07	6.29398e-05	336.466	428.411	468.832	437.172	559.293	531.228	575.194	597.739	481.028	490.99	482.663	441.674	840.128	807.317	711.101	708.259
BTG1	975.316	-0.514707	0.102518	-5.02065	5.14981e-07	6.29398e-05	1391.68	1542.85	1163.93	1119.3	1085.58	1101.52	896.913	904.113	860.11	929.185	906.792	909.967	740.802	705.256	636.646	710.429
TUFM	2120.89	-0.230189	0.046278	-4.97405	6.55676e-07	7.86875e-05	2416.83	2294.35	2230.07	2118.67	2399.76	2317.61	2355.73	2252.34	1856.81	1908	1952.72	1878.1	2067.21	2026.32	1971.44	1888.33
CIITA	1707.57	-0.22397	0.0452097	-4.95402	7.2695e-07	8.64022e-05	130.291	108.17	121.762	129.28	3662.6	3674.33	3404.19	3532.58	70.2737	74.9683	85.4016	102.532	3089.43	3080.19	2997.63	3057.56
ESM1	807.473	-0.751516	0.152266	-4.93554	7.99302e-07	9.40968e-05	970.74	1132.94	746.871	891.354	1276.29	1227.38	935.023	882.923	481.028	477.263	671.698	657.582	575.26	620.396	690.599	682.229
R3HCC1L	408.908	0.339724	0.0692014	4.9092	9.14477e-07	0.00010664	292.081	362.94	331.73	328.304	410.148	394.949	364.26	417.623	392.939	411.798	411.655	413.084	493.523	490.812	508.237	518.45
NOX4	289.749	0.400893	0.0817936	4.90128	9.52158e-07	0.000109997	247.696	280.389	292.421	293.432	217.605	224.817	242.84	247.219	339.491	333.662	349.283	340.129	303.149	303.891	295.663	324.303
LOC100138864	133.319	0.574119	0.118631	4.83954	1.30141e-06	0.000148952	115.973	115.287	105.463	135.234	121.639	109.371	101.922	99.7703	140.547	152.048	134.34	152.811	156.231	175.454	152.148	164.863
REL	112.138	0.812797	0.168296	4.82958	1.36822e-06	0.000155161	104.519	83.9743	114.092	115.672	54.4012	81.5939	86.8552	83.8777	157.373	140.434	116.108	121.263	117.949	144.491	121.934	149.678
KLF2	191.102	0.749709	0.155547	4.81981	1.43693e-06	0.000161471	174.676	152.292	158.195	134.384	135.086	151.036	123.193	127.141	302.87	267.141	219.741	209.007	242.106	283.249	196.389	181.132
ID3	598.149	0.520891	0.108689	4.79249	1.64724e-06	0.000183437	469.621	389.982	499.512	481.399	480.442	468.731	639.006	674.553	546.353	543.784	564.226	571.81	819.435	807.317	783.398	830.822
FAM20C	949.798	-0.263613	0.0550712	-4.78677	1.69485e-06	0.000187054	1065.24	1050.39	1091.06	1006.18	1018.34	1082.42	984.655	1031.25	797.755	857.384	861.692	920.812	830.816	880.71	838.43	879.63
DDX52	1168.56	-0.255292	0.0534708	-4.77442	1.80228e-06	0.000197151	1224.16	1420.45	1212.83	1225.61	1260.4	1303.77	1272.69	1211.37	1059.05	1079.12	1099.67	1097.28	1023.26	1084.83	1074.74	1047.75
LNPEP	3023.41	0.409724	0.0859701	4.76589	1.88023e-06	0.000203873	2365.28	2337.05	2986.52	2674.91	2658.32	2832.35	2462.08	2458.94	3617.61	3774.81	3064.86	3308.61	3343.96	3589.35	3249.05	3650.84
RAB7B	134.262	-0.941974	0.198754	-4.7394	2.14352e-06	0.0002304	181.835	192.144	132.308	134.384	213.937	271.69	162.189	158.926	55.4271	66.5212	82.5229	75.9128	85.8751	98.6211	106.827	129.07
SLC29A1	4413.54	-0.170228	0.0360074	-4.72757	2.27222e-06	0.000242129	4852.27	4844.89	4718.04	4703.42	4635.71	4631.76	4747.79	4538.23	3981.84	4006.05	4318.06	4153.51	4282.37	3973.51	4187.83	4041.31
MECOM	993.586	0.333535	0.0707385	4.71504	2.41668e-06	0.000255321	987.921	982.072	919.447	885.4	853.915	831.563	865.007	904.113	1166.94	1115.02	1015.22	1019.4	1212.6	1113.5	1002.45	1022.8
SH3RF3	47.4279	-1.22109	0.260046	-4.69566	2.65741e-06	0.000278375	70.1567	56.9317	81.4943	63.7896	57.4574	51.2132	77.9924	72.3997	36.6215	39.068	25.9083	14.7882	28.9699	35.5495	25.8975	20.6079
LOC101905509	17.9452	1.59636	0.340418	4.68941	2.73997e-06	0.000284611	8.59062	4.26988	14.3813	8.50529	8.55749	5.20812	14.1804	12.3609	22.7647	28.5091	18.2318	20.7035	30.0046	37.843	25.8975	27.1156
NECTIN3	2111.7	0.212889	0.0457676	4.65152	3.29504e-06	0.000339416	1878.48	2035.31	2000.92	2030.21	1873.48	2097.14	1961.33	1947.73	2158.69	2179.36	2252.11	2247.81	2221.37	2194.89	2325.38	2382.92
CNR1	443.601	-0.538923	0.115906	-4.64965	3.32505e-06	0.000339677	743.089	801.314	636.614	593.669	360.026	388.005	327.923	349.638	453.315	524.778	452.916	485.053	217.274	213.297	264.37	286.341
CEP85L	526.356	0.66971	0.144222	4.64361	3.42376e-06	0.000346894	393.737	364.363	606.892	570.705	281.175	299.467	362.488	364.647	835.366	806.701	700.485	758.142	509.043	568.792	484.498	515.196
DAAM2	380.385	1.08015	0.234194	4.61219	3.98452e-06	0.000397198	180.403	194.991	291.462	269.618	184.597	191.832	301.334	340.808	598.811	619.808	389.585	372.663	682.862	597.461	408.964	460.965
UBAP2L	4793.75	-0.148686	0.0322323	-4.61295	3.97001e-06	0.000397198	5028.38	5044.15	5015.25	5167.81	5100.26	4863.52	4913.52	5064.45	4777.62	4665.99	4474.47	4590.26	4626.91	4572.12	4398.25	4397.07
DGKA	374.14	-0.377029	0.0821356	-4.59032	4.42557e-06	0.000437636	449.576	407.062	402.677	446.527	443.767	408.838	436.935	384.072	359.287	315.712	325.294	314.496	319.704	358.935	314.007	299.356
PEA15	3187.78	-0.156443	0.0342218	-4.57145	4.84353e-06	0.000475166	3357.5	3551.11	3235.8	3366.39	3384.49	3356.63	3288.98	3295.07	2999.99	2986.06	3073.5	3149.89	2994.25	2957.49	3030	2977.29
LOC510185	364.898	0.677619	0.148408	4.56593	4.97282e-06	0.000484008	28.6354	35.5823	27.8039	25.5159	697.435	558.137	435.162	451.174	34.642	36.9562	46.0593	28.5905	873.236	967.863	758.579	832.991
SLC1A5	3561.8	-0.237686	0.0521007	-4.56205	5.06566e-06	0.000489192	3712.58	3803.04	3759.28	3691.29	3977.4	4400.86	3787.07	3772.73	2985.15	3094.82	3232.79	3254.39	3399.83	3380.64	3522.05	3214.83
ALDH18A1	2044.76	-0.230864	0.050644	-4.55856	5.15054e-06	0.000493534	2229.27	2384.01	2169.66	1996.19	2198.05	2258.59	2128.84	2161.4	1909.27	1867.87	1971.91	1986.55	1808.55	1853.16	1912.1	1880.74
HEATR5A	806.076	0.367072	0.0810607	4.52836	5.94432e-06	0.000561567	701.567	683.18	828.365	759.522	586.799	634.523	692.183	739.007	1028.37	991.482	953.811	884.335	875.305	852.041	816.849	869.868
SLAIN2	1721.66	0.227521	0.0502463	4.52811	5.9514e-06	0.000561567	1443.22	1514.38	1617.42	1639.82	1514.06	1631.01	1651.14	1658.13	1870.67	1759.12	1867.32	1832.75	1888.22	1814.17	1879.72	1965.34
CAPZB	4473.91	-0.176274	0.0389805	-4.52212	6.12231e-06	0.000569952	5019.79	4921.75	4679.69	4634.53	4772.02	4703.8	4652.07	4662.72	4293.62	4173.94	4258.56	4179.15	4410.67	4218.92	3988.21	4013.11
FMR1	1406.64	0.258368	0.0571387	4.52177	6.13248e-06	0.000569952	1178.35	1103.05	1262.68	1338.73	1352.08	1270.78	1407.41	1332.33	1487.62	1527.88	1404.81	1425.58	1589.21	1597.43	1580.82	1647.54
NXPH3	133.246	-0.604847	0.134009	-4.51347	6.37752e-06	0.000583945	166.085	172.218	167.782	159.049	159.536	144.959	150.667	117.429	138.568	117.204	125.703	134.08	73.4594	97.4744	102.511	105.209
GNPTAB	1568.97	0.200401	0.0443998	4.51357	6.37458e-06	0.000583945	1317.23	1286.66	1285.69	1335.33	1641.81	1669.2	1532.37	1658.13	1535.13	1447.63	1459.5	1462.06	1924.43	1916.23	1755.63	1876.4
EMB	468.067	-0.367009	0.0817575	-4.48899	7.15608e-06	0.000650414	475.348	476.803	489.924	529.029	556.848	578.101	484.794	520.042	435.499	405.462	433.725	442.66	379.713	384.164	425.15	471.811
SRSF10	3960.83	0.181758	0.0407074	4.46498	8.00765e-06	0.000719863	3496.38	3424.44	3544.52	3718.51	3892.43	3923.45	3852.65	3890.16	4153.08	4153.88	3851.71	3823.24	4498.61	4573.27	4253.66	4323.31
LOC784541	730.333	-0.268459	0.060136	-4.46421	8.03665e-06	0.000719863	823.268	781.388	745.912	829.265	876.531	765.594	834.874	841.426	570.108	606.082	627.558	625.048	705.624	676.587	694.915	681.144
DYNLL1	2236.85	-0.17572	0.0393784	-4.46235	8.10649e-06	0.000720895	2441.17	2422.44	2414.15	2348.31	2199.27	2273.35	2333.57	2386.54	2292.31	2236.38	2175.34	2135.42	2056.86	2080.22	1972.52	2021.74
DLX3	44.1943	0.949337	0.213165	4.45354	8.44666e-06	0.00074578	17.1812	22.7727	26.8452	25.5159	29.34	30.3807	45.2002	40.6145	36.6215	44.3475	54.6954	55.2093	67.2516	59.6314	66.9017	84.6007
BTF3	6502.02	-0.140808	0.0316527	-4.44854	8.64551e-06	0.000757923	6567.53	6902.97	6602.95	6680.9	6880.83	7074.37	6877.52	6607.8	6328.59	6060.82	6257.34	6302.73	6327.86	6113.36	6383.72	6063.05
WNT5B	1008.72	0.817572	0.183926	4.44511	8.78475e-06	0.000764706	755.975	711.646	888.767	899.009	558.682	578.97	762.199	780.504	1632.13	1660.92	1095.83	1093.34	1435.05	1450.65	929.071	906.746
EIF2S1	2845.14	-0.22591	0.0508499	-4.44268	8.88444e-06	0.000767976	2990.97	3148.32	2780.39	2839.91	3188.89	3352.29	3102.86	2979.87	2570.43	2494.02	2544.78	2734.83	2678.68	2603.14	2779.66	2733.25
PTP4A3	15.6574	1.75485	0.396536	4.42546	9.62392e-06	0.000820422	7.15885	8.53975	3.83502	5.9537	7.33499	7.81218	10.6353	11.478	17.8159	11.6148	20.1509	13.8023	24.8314	18.3481	26.9765	54.2312
LDHA	11580	-0.293424	0.0663026	-4.42554	9.62021e-06	0.000820422	13180.9	14297	11703.5	11853	13197.5	14347.5	12122.5	12350.3	10129.3	9884.2	9829.82	9938.66	10964.1	10867.8	10410.8	10203.1
SOGA1	714.68	-0.357536	0.0809257	-4.41808	9.95822e-06	0.00082918	810.382	772.848	780.427	785.038	809.294	838.508	654.959	731.06	702.737	782.416	644.83	751.241	580.433	614.662	568.665	607.389
CHST1	143.474	0.845697	0.191331	4.42008	9.86653e-06	0.00082918	71.5885	64.0482	60.4016	53.5833	154.035	143.223	128.51	120.078	157.373	136.21	111.31	112.39	316.6	302.744	183.44	180.048
ADGRG1	6132.11	0.212832	0.0481529	4.41991	9.8741e-06	0.00082918	5963.32	5839.77	6159.05	5954.55	5059.31	5472	5395.66	5839.65	7109.52	7009.01	6708.34	6387.52	6533.75	6361.06	6101.01	6220.32
IL2RB	44.4019	0.828229	0.187498	4.41728	9.99497e-06	0.00082918	11.4542	7.11646	13.4226	8.50529	63.5699	56.4213	41.6551	63.5705	6.92839	9.50303	11.5148	14.7882	98.2908	108.942	93.8783	100.87
SENP6	1743.44	0.202121	0.0458601	4.40735	1.04645e-05	0.000862344	1506.22	1552.81	1643.31	1730.83	1624.09	1657.05	1684.81	1603.39	1806.33	1818.25	1849.09	1861.34	1806.48	1947.19	1886.2	1917.62
ATP1A1	11503.5	-0.338108	0.0768784	-4.39796	1.09271e-05	0.000894504	14005.6	14369.6	11830.1	11653.1	13528.8	14433.4	11780.4	11947.7	9642.34	10100.7	9952.64	9918.94	10548.2	10416	10086	9842.96
AQP1	282.165	0.737226	0.167832	4.39264	1.11983e-05	0.00091067	157.495	163.679	240.648	265.365	180.318	177.944	267.656	276.355	311.778	330.494	300.345	342.1	390.059	391.044	370.118	349.249
DENND5B	1030.35	0.372685	0.084962	4.38649	1.15194e-05	0.000930666	808.95	889.558	1059.43	996.819	775.064	898.401	945.658	982.694	1122.4	1142.47	1138.05	1069.68	1177.42	1196.07	1089.85	1193.09
SETX	2046.21	0.314802	0.072093	4.36661	1.26192e-05	0.00100718	1592.13	1690.87	2118.85	1911.14	1859.42	1927.87	1909.04	1994.52	2009.23	2103.34	1971.91	2086.12	2308.28	2511.4	2303.79	2441.49
RIMS2	758.871	0.52243	0.119647	4.36643	1.26294e-05	0.00100718	532.618	566.47	784.262	728.903	509.782	518.208	663.822	686.031	949.189	913.346	933.66	944.473	817.365	830.252	850.3	913.253
BCL2L13	2829.12	-0.218923	0.0503607	-4.34711	1.37946e-05	0.00109304	3298.8	3041.58	3161.02	3096.77	2856.98	2862.73	3080.7	3174.11	2574.39	2517.25	2759.72	2559.34	2541.08	2424.24	2672.83	2644.31
BAX	960.745	-0.571628	0.13162	-4.34303	1.40532e-05	0.00110644	1297.18	1299.47	974.096	1018.08	1321.52	1210.89	1058.22	993.289	688.88	720.118	842.501	861.659	661.135	675.44	850.3	899.153
IDS	1367.5	0.210746	0.0486028	4.33609	1.45039e-05	0.0011347	1166.89	1245.38	1250.22	1273.24	1304.41	1289.01	1193.82	1174.29	1556.91	1548.99	1581.37	1543.89	1362.62	1471.29	1455.65	1462.07
FGD6	490.073	0.306023	0.0707223	4.3271	1.51082e-05	0.00117455	398.032	436.951	414.183	431.218	496.945	521.68	463.523	462.652	460.243	469.872	453.876	424.914	600.091	631.863	537.372	637.759
SPTBN4	79.7828	-0.747197	0.173005	-4.31894	1.56778e-05	0.00121121	130.291	120.98	104.504	85.0529	101.467	96.3502	86.8552	90.0582	56.4169	66.5212	63.3315	50.2799	50.6973	68.8054	57.1902	47.7235
TMEM190	436.98	0.461922	0.107163	4.31045	1.62922e-05	0.00125085	445.28	384.289	364.327	358.073	327.629	355.888	366.919	346.106	563.179	569.126	485.542	503.785	546.29	536.682	390.62	447.95
SYNGR2	1015.76	-0.292681	0.0679309	-4.3085	1.64365e-05	0.00125253	1274.28	1145.75	1061.34	1058.06	1090.47	1181.38	1107.85	1128.38	804.683	889.061	953.811	878.419	889.79	899.058	967.917	921.93
PGPEP1	92.1596	-0.769061	0.178543	-4.30743	1.65166e-05	0.00125253	148.904	102.477	95.8756	95.2592	143.644	145.827	100.149	107.717	53.4476	57.0182	62.3719	69.0116	71.3901	71.0989	77.6924	72.6698
HDLBP	10999.7	-0.165073	0.0383452	-4.30492	1.67049e-05	0.00125908	12185.8	12273.1	11672.9	11293.3	11569.7	11496.9	11356.8	11625.5	10803.3	10546.2	10079.3	10021.5	10568.8	10588	9899.3	10015.4
GOLIM4	2224.84	0.178235	0.0414974	4.29509	1.74621e-05	0.00130818	2170.56	1969.84	2098.72	2101.66	2036.07	2070.23	2088.96	1985.69	2340.81	2458.12	2562.05	2458.79	2249.31	2267.14	2373.93	2365.56
ABHD5	293.447	0.931145	0.216892	4.29312	1.76181e-05	0.00131191	147.472	162.255	267.493	277.272	155.257	131.071	256.134	226.028	457.274	435.027	350.242	366.747	411.787	395.631	352.853	302.61
BCL6	290.112	0.593597	0.138443	4.28766	1.80566e-05	0.00133371	246.264	263.309	301.049	322.35	179.096	194.437	260.566	287.833	292.972	262.917	315.698	329.284	329.015	344.027	348.537	364.434
CEP70	485.178	0.314733	0.0734191	4.2868	1.81266e-05	0.00133371	370.828	444.067	427.605	475.445	459.048	428.802	440.48	472.364	483.008	497.325	519.126	502.799	513.181	573.379	579.455	575.935
MPHOSPH9	1109.43	0.266641	0.0624996	4.26628	1.9876e-05	0.00145377	1015.12	950.759	1083.39	1098.03	914.429	955.69	1013.02	1027.72	1187.72	1340.98	1232.09	1232.35	1188.8	1246.53	1137.33	1126.92
LOC112446772	83.4146	0.741518	0.174021	4.2611	2.03427e-05	0.00147915	48.6802	41.2755	73.8242	72.2949	64.7924	59.8934	54.9492	70.6339	106.895	126.707	94.9973	100.56	97.2561	104.355	94.9573	122.563
DUSP10	180.677	0.56891	0.133768	4.25296	2.10964e-05	0.00149387	133.155	143.753	114.092	97.8108	198.045	160.584	176.369	165.99	160.343	129.875	175.601	192.247	232.794	246.553	284.872	278.748
GCN1	4094.01	-0.223095	0.0524482	-4.25363	2.10329e-05	0.00149387	4643.23	4659.86	4273.18	4207.56	4478.62	4476.38	4251.47	4283.06	3967	3937.42	3587.83	3753.25	3995.78	3814.11	3666.65	3508.76
MGAT5	1096.56	0.418421	0.0983533	4.25426	2.09737e-05	0.00149387	923.492	945.066	1067.1	1021.48	862.472	856.736	1065.31	1087.76	1236.22	1245.95	1035.37	1027.29	1374	1385.28	1200.99	1210.44
IGFBP3	86.7613	-6.0154	1.41374	-4.25495	2.09098e-05	0.00149387	204.743	160.832	3.83502	8.50529	526.285	446.162	10.6353	7.94631	0	0	1.91914	1.97176	1.03464	4.58703	7.55342	2.16925
CA5B	268.651	0.401196	0.0943458	4.2524	2.11494e-05	0.00149387	236.242	216.34	246.4	265.365	234.108	265.614	213.593	217.199	282.084	309.376	305.143	278.018	301.08	279.809	319.402	328.641
NKAIN1	649.685	-0.361168	0.0850786	-4.24512	2.18481e-05	0.00153446	757.406	757.192	674.005	717.846	745.724	785.558	708.136	715.168	492.905	519.499	617.002	604.345	541.117	516.041	623.697	619.32
MRPS33	578.845	-0.289911	0.0686923	-4.22043	2.43841e-05	0.00170289	607.07	614.862	574.295	587.715	692.545	654.487	622.167	611.866	552.292	541.672	533.52	552.093	496.627	572.232	567.586	480.488
ZNF516	32.08	-2.81399	0.667649	-4.21478	2.50022e-05	0.00173625	85.9062	72.5879	14.3813	15.3095	93.5211	114.579	24.8158	24.7219	5.93862	7.39124	8.63611	8.87292	7.24248	2.29351	6.47436	20.6079
TMEM63B	641.724	-0.342258	0.0813488	-4.20729	2.58449e-05	0.00178474	710.158	734.419	745.912	693.181	726.164	661.431	632.802	670.139	599.801	599.747	693.768	674.342	468.692	506.867	542.767	607.389
ARL4D	199.551	0.58346	0.139117	4.19402	2.74058e-05	0.00188202	211.902	152.292	191.751	184.565	128.974	119.787	175.483	164.224	260.31	240.743	230.296	253.371	189.339	219.031	206.101	264.648
NRARP	31.9898	1.61673	0.385631	4.19241	2.76003e-05	0.0018849	7.15885	14.2329	19.1751	23.8148	12.8362	8.6802	20.3844	13.2438	72.2532	69.6889	43.1806	38.4493	53.8013	61.9249	25.8975	27.1156
SLC35B1	935.543	-0.221913	0.0529541	-4.19067	2.78134e-05	0.00188902	1007.97	987.765	1052.71	969.603	968.218	965.239	1015.67	1040.97	874.957	853.161	896.237	919.826	913.587	830.252	835.193	837.33
ANTXR2	1056.99	-0.432295	0.103234	-4.18754	2.81993e-05	0.00190476	1261.39	1404.79	1068.05	1125.25	1256.73	1416.61	1011.24	1053.33	998.678	934.464	957.649	910.953	903.241	899.058	852.458	857.938
PCDH18	1508.17	0.339076	0.0810219	4.18499	2.85183e-05	0.00191584	1779.69	1806.16	1690.29	1684.9	807.46	932.254	911.98	942.079	2516	2414.82	2047.72	2057.53	1237.43	1160.52	1088.77	1053.17
MITF	246.976	0.392535	0.0938838	4.18108	2.90133e-05	0.00193856	178.971	182.181	243.524	222.838	224.328	240.442	242.84	233.975	231.606	233.352	250.447	233.654	303.149	285.543	322.639	322.133
PLK2	10696.4	-0.271674	0.0650485	-4.17648	2.96051e-05	0.00196746	13583.2	14139	12631.6	13049.7	9724.97	9942.3	10106.2	10045	10493.5	10726.8	11873.7	11844.4	7535.28	7643.14	9050.08	8754
PDE3B	3770.24	0.518103	0.124449	4.16317	3.13862e-05	0.00207468	1673.74	1750.65	2497.56	2480.99	3437.66	3671.73	4437.59	4337.8	3576.04	3556.24	3105.16	3054.26	6054.71	5839.29	5296.03	5554.36
BAALC	20.1743	1.63556	0.395512	4.13529	3.54505e-05	0.00233087	4.29531	4.26988	5.75254	5.10317	11.0025	13.0203	16.8393	26.4877	13.8568	3.16768	6.71698	4.9294	69.3209	68.8054	37.7671	31.4541
RIN2	1101.05	0.304696	0.0737916	4.12914	3.64126e-05	0.00237073	985.058	937.95	1144.75	1181.38	899.147	883.645	902.231	891.753	1416.36	1373.72	1310.77	1271.79	1171.21	1150.2	1011.08	1085.71
BCL2L14	888.908	0.3464	0.0838951	4.12896	3.64403e-05	0.00237073	617.093	583.55	563.748	664.263	1005.5	880.173	938.568	1025.07	648.299	725.398	806.997	867.575	1182.59	1222.44	1288.4	1202.85
CD9	14652.2	0.197636	0.047887	4.12713	3.67326e-05	0.00237724	13892.5	13428.8	13223.2	12982.5	14440.1	13779.8	13381.9	13721.5	15155.4	14750.8	16389.4	15839.2	15411	14870	16194.5	16975.5
C21H15orf39	975.795	0.337366	0.0818241	4.12306	3.73864e-05	0.00238213	1030.87	890.981	1050.8	973.855	737.778	712.645	781.697	862.616	1233.25	1221.67	1089.11	1119.96	1051.19	1055.02	896.699	904.576
EVI5	1209.49	0.398145	0.0965095	4.12545	3.70016e-05	0.00238213	939.241	939.373	1260.76	1210.3	893.035	986.071	1109.62	1104.54	1340.15	1393.78	1377.94	1407.84	1257.09	1348.59	1395.23	1388.32
KHSRP	4440.89	-0.139485	0.0338266	-4.12353	3.73113e-05	0.00238213	4734.86	4750.95	4793.78	4716.18	4513.46	4555.37	4867.44	4514.39	4236.22	4188.72	4283.51	4154.5	4289.62	4269.38	4171.65	4014.19
ID2	1146.88	0.418466	0.101795	4.11089	3.94138e-05	0.00249843	1258.53	1275.27	1171.6	1183.09	690.1	723.061	845.509	806.992	1724.18	1761.23	1404.81	1411.78	1102.93	1159.37	901.015	930.607
PTP4A1	3204.99	-0.279128	0.0679297	-4.10908	3.97241e-05	0.00250525	3344.61	3558.23	3449.6	3659.82	3461.5	3699.5	3387.35	3235.03	2958.42	2770.66	3164.66	3232.7	2781.11	2524.01	3064.53	2988.14
HS3ST1	24.9693	-4.37177	1.06528	-4.10386	4.06309e-05	0.00254944	12.8859	8.53975	0	1.70106	158.314	148.431	22.1569	29.1365	0	1.05589	0	0	2.06928	1.14676	5.3953	8.67699
TSC2	599.026	-0.286962	0.0699586	-4.10188	4.09803e-05	0.00255837	628.547	654.715	705.644	726.351	648.535	602.406	681.548	693.978	483.008	531.114	556.55	520.545	529.736	518.334	565.428	537.974
UBQLN4	521.403	-0.266789	0.0651988	-4.09193	4.27794e-05	0.00263391	566.981	623.402	574.295	549.441	551.958	567.685	506.065	550.061	526.558	480.431	514.329	521.531	439.722	447.235	472.628	450.119
STXBP3	1077.25	0.270104	0.0660132	4.09166	4.28296e-05	0.00263391	674.364	750.075	792.891	836.92	1205.99	1111.93	1214.2	1229.91	887.824	858.44	926.943	1002.64	1408.14	1459.82	1375.8	1500.04
AMOT	1887.91	0.250867	0.0613088	4.09186	4.2792e-05	0.00263391	2160.54	2187.6	1866.7	1910.29	1408.32	1428.76	1447.29	1460.36	2330.91	2337.74	2396.04	2438.08	1589.21	1628.4	1843.04	1773.36
MCTP1	40.4236	1.08947	0.266549	4.08732	4.36391e-05	0.00267041	15.7495	35.5823	46.979	34.8717	18.9487	26.9086	21.2707	35.3169	60.376	46.4592	44.1401	44.3646	46.5588	47.017	63.6646	58.5697
SEC14L5	15.4639	1.61532	0.395479	4.08447	4.41769e-05	0.00269	11.4542	4.26988	16.2989	5.9537	6.11249	4.3401	7.09022	8.82923	21.7749	25.3414	23.9892	31.5482	19.6582	21.7884	14.0278	24.9464
SEC61G	1616.94	-0.25355	0.0621738	-4.07808	4.54094e-05	0.00273807	1868.46	1881.59	1528.26	1635.57	1797.07	1787.25	1713.18	1764.96	1446.05	1478.25	1498.85	1546.85	1489.88	1424.27	1549.53	1460.99
CNN3	6933.61	0.191771	0.0470167	4.07878	4.52726e-05	0.00273807	4554.46	4701.14	5162.9	5122.73	8287.93	7882.49	8291.13	8210.3	5483.33	5498.03	5311.21	5113.76	9711.13	9558.22	8873.11	9175.92
ANGEL2	1102.32	0.195396	0.0479701	4.07328	4.6355e-05	0.00278152	975.035	962.146	1006.69	1027.44	1037.9	1107.59	1068.85	1056.86	1114.48	1173.1	1110.22	1111.09	1290.2	1231.62	1152.44	1211.53
MCL1	4965.88	0.272249	0.0668931	4.06991	4.70319e-05	0.00279892	3361.8	3166.83	4111.15	3885.21	4941.95	5164.72	5052.67	5101.53	5070.59	4939.46	5182.63	5008.27	5942.97	6053.73	5979.07	6491.47
ADGRL1	140.038	-0.641594	0.157656	-4.06958	4.70978e-05	0.00279892	204.743	162.255	175.452	143.739	151.59	155.376	149.781	185.414	151.435	130.931	102.674	115.348	91.0483	123.85	84.1667	112.801
CDK2AP1	1616.07	-0.207033	0.0509067	-4.0669	4.76427e-05	0.00281776	1735.31	1833.2	1755.48	1750.39	1668.1	1783.78	1730.01	1638.71	1536.12	1376.88	1556.42	1586.28	1517.82	1487.34	1499.89	1401.33
ADD3	754.822	0.257395	0.0633112	4.06556	4.79168e-05	0.00282047	674.364	707.376	666.335	738.259	655.87	724.797	680.661	632.173	836.356	880.614	854.016	809.408	774.945	751.126	855.695	835.16
RPL36A	1911.97	-0.317156	0.078053	-4.06335	4.83736e-05	0.00283387	2319.47	2337.05	1911.76	1842.24	2277.51	2107.55	2012.74	2048.38	1689.54	1645.08	1750.25	1868.24	1736.13	1620.37	1685.49	1739.74
XIAP	1257.27	0.319471	0.0788062	4.05388	5.03742e-05	0.00293715	893.424	916.6	1122.7	1079.32	1108.19	1226.51	1220.4	1206.96	1426.26	1386.39	1340.52	1250.1	1414.35	1486.2	1396.3	1642.12
FBN2	126.782	0.897521	0.221864	4.04538	5.22394e-05	0.0030316	67.2932	78.2811	138.061	124.177	60.5137	78.1218	86.8552	123.609	149.455	155.216	162.167	157.741	135.538	147.932	172.65	190.894
GSTP1	1967.97	-0.330979	0.0818954	-4.04148	5.31153e-05	0.00306803	2657.36	2348.43	2084.34	1954.51	2331.92	2255.98	1954.24	2090.76	1718.24	1773.9	1757.93	1693.74	1726.81	1749.95	1688.73	1700.69
SPHK1	1800.87	0.245104	0.0606958	4.03824	5.38547e-05	0.00309627	1824.07	1743.53	1634.68	1576.03	1683.99	1673.54	1554.53	1611.33	1999.34	2101.22	1789.59	1886.97	1980.3	2017.15	1891.59	1846.03
TMSB10	9358.52	-0.284085	0.0704496	-4.03245	5.51974e-05	0.00315877	11329.6	11202.7	9188.72	9192.51	11229.3	10371.1	9780.08	9841.95	8481.34	8174.71	8403.9	8681.66	8442.66	8562.84	8537.53	8315.81
LOC101903478	82.4306	-0.649765	0.161272	-4.029	5.60155e-05	0.00319082	91.6333	108.17	90.1231	95.2592	117.971	114.579	85.0827	100.653	48.4987	63.3535	74.8463	61.1246	65.1823	59.6314	75.5342	67.2467
UBA1	5066.15	-0.154973	0.0384852	-4.02682	5.65373e-05	0.00320577	5440.73	5495.33	5403.55	5161.01	5437.67	5475.47	5211.31	5276.35	4817.21	4806.42	4654.87	4653.35	4982.83	5022.8	4588.16	4631.34
FAM135A	928.432	0.292402	0.0727432	4.01965	5.82859e-05	0.00328983	708.726	779.964	862.88	924.525	776.898	901.873	874.756	833.48	1027.38	988.315	1050.73	982.923	1025.33	1018.32	1038.06	1060.76
ATXN7	1239.4	0.268064	0.066772	4.01461	5.95437e-05	0.00334555	983.626	906.637	998.065	1072.52	1190.71	1209.15	1448.18	1268.76	1161	1097.07	1145.72	1192.92	1476.43	1521.75	1573.27	1584.64
HUNK	389.889	0.366604	0.0914633	4.00821	6.11811e-05	0.00342199	346.488	308.854	388.296	387.841	327.018	327.244	361.601	366.413	387.99	363.227	438.523	454.491	415.925	459.85	442.415	462.05
CALM1	24756.8	-0.117082	0.0292215	-4.00669	6.15755e-05	0.00342853	26237.2	26548.7	25779	26242.2	24874.2	25660.4	24973.5	25394.6	23614.9	23577	25432.4	24742.6	23436.7	23196.6	23711.3	22688.2
VPS54	1012	0.218888	0.0546551	4.00491	6.20417e-05	0.003439	622.82	629.095	640.449	699.134	1268.95	1312.45	1142.41	1194.6	716.594	749.683	728.312	758.142	1379.17	1452.94	1425.44	1471.83
GRB7	40.3314	0.916023	0.229074	3.99881	6.36623e-05	0.00351308	35.7942	24.196	45.0615	38.2738	17.7262	22.5685	33.6786	26.4877	52.4578	53.8505	52.7763	56.1952	46.5588	40.1365	47.4787	52.062
LOC515697	249.582	0.643211	0.160951	3.99632	6.43349e-05	0.00353442	5.72708	5.69317	14.3813	11.9074	326.407	280.371	456.433	461.769	12.867	9.50303	13.434	15.7741	590.779	607.781	551.4	629.082
SEMA5B	72.2276	0.91924	0.230274	3.99194	6.55348e-05	0.0035844	52.9755	46.9687	49.8553	55.2844	49.5112	43.401	62.9257	37.9657	76.2123	72.8565	124.744	116.334	70.3555	73.3925	111.143	111.716
RPL23	6921.43	-0.22371	0.0560991	-3.98776	6.66993e-05	0.00362066	7664.26	8038.76	7020.01	6608.61	7578.27	7312.2	7435.87	7512.79	6797.74	6447.28	6265.98	6506.81	6516.16	6539.96	6502.42	5995.8
LOC107131948	783.387	0.457662	0.114775	3.98746	6.67835e-05	0.00362066	572.708	455.454	581.965	632.793	866.14	631.051	662.936	625.993	869.018	936.576	938.458	926.727	815.296	1044.7	981.945	992.431
[truncated: 18,212 more rows]
