# Supplementary material for: Ruminant-specific retrotransposons shape regulatory evolution of bovine immunity
Source: HighWire-hosted journal article supplement (doi:10.1101/gr.276241.121), 2022-08-01
Supplement: Supplemental_Table_S12.xlsx [file Supplemental_Table_S12.xlsx]

## Sheet: Description
Supplemental Table S12
Summary of assemblies used in RepeatMasker analysis.

## Sheet: Assemblies
Scientific name	Common name	Assembly name	Scaffold N50	Contig N50	Source
Phataginus tricuspis	Tree pangolin	Jaziri_pseudohap2_scaffolds_HiC	46351422	112908	https://www.dnazoo.org/assemblies/Phataginus_tricuspis
Lutra lutra	Eurasian river otter	GCA_902655055.2_mLutLut1.2	149004807	30403456	https://www.ncbi.nlm.nih.gov/assembly/GCA_902655055.2/
Zalophus califnornianus	California sea lion	GCF_009762305.2_mZalCal1.pri.v2	147124152	32626160	https://www.ncbi.nlm.nih.gov/assembly/GCF_009762305.2/
Ailuropoda melanoleuca	Giant panda	GCF_002007445.1_ASM200744v2	129245720	127363	https://www.ncbi.nlm.nih.gov/assembly/GCF_002007445.1/
Felis catus	Domestic cat	GCF_000181335.3_Felis_catus_9.0	83967707	41915695	https://www.ncbi.nlm.nih.gov/assembly/GCF_000181335.3/
Panthera tigris	Tiger	PanTig1.0_HiC	145958240	30001	https://www.dnazoo.org/assemblies/Panthera_tigris
Ceratotherium simum	Southern white rhinoceros	CerSimSim1.0_HiC	66082373	92633	https://www.dnazoo.org/assemblies/Ceratotherium_simum
Tapirus indicus	Malayan tapir	Tapirus_indicus_HiC	111226585	156144	https://www.dnazoo.org/assemblies/Tapirus_indicus
Vicugna pacos	Alpaca	Vicugna_pacos-2.0.1_HiC	73726673	24594	https://www.dnazoo.org/assemblies/Vicugna_pacos
Tragulus javanicus	Java mouse-deer	GCA_004024965.2_ASM402496v2	14082842	80230	https://www.ncbi.nlm.nih.gov/genome/?term=txid9849[Organism:noexp]
Giraffa cameloparalis	Giraffe	ASM165123v1_HiC	154205505	22965	https://www.dnazoo.org/assemblies/Giraffa_camelopardalis
Cervus elaphus hippelaphus	Central European red deer	GCA_002197005.1_CerEla1.0	107358006	7944	https://www.ncbi.nlm.nih.gov/assembly/GCA_002197005.1/
Muntiacus reevesi	Reeve's muntjac	CIJ_HiC	114898071	68088	https://www.dnazoo.org/assemblies/Muntiacus_reevesi
Odocoileus hemionus	Mule deer	Odocoileus_hemionus_HiC	72141738	28571243	https://www.dnazoo.org/assemblies/Odocoileus_hemionus
Connochaetes taurinus	Blue wildebeest	BWD_HiC	98098359	46500	https://www.dnazoo.org/assemblies/Connochaetes_taurinus
Litocranius walleri	Gerenuk	GRK_HiC	100165937	47174	https://www.dnazoo.org/assemblies/Litocranius_walleri
Tragelaphus eurycerus isaaci	Eastern bongo	barney_pseudo2.1_HiC	192009155	79488	https://www.dnazoo.org/assemblies/Tragelaphus_eurycerus_isaaci
Ovis aries	Sheep	GCA_016772045.1_ARS-UI_Ramb_v2.0	101274418	43178051	https://www.ncbi.nlm.nih.gov/assembly/GCA_016772045.1
Oryx dammah	Scimitar-horned oryx	GCF_014754425.2_SCBI_Odam_1.1	100398400	374342	https://www.ncbi.nlm.nih.gov/assembly/GCA_014754425.2/
Moschus berezovskii	Forest musk deer	ls35.final.genome_HiC	102122392	22671	https://www.dnazoo.org/assemblies/Moschus_berezovskii
Hippopotamus amphibius	Hippopotamus	GCA_004027065.2_HipAmp_v2_BIUU_UCD	4444377	76609	https://www.ncbi.nlm.nih.gov/assembly/GCA_004027065.2
Balaenoptera musculus	Blue whale	GCF_009873245.2_mBalMus1.pri.v3	110314666	6315640	https://www.ncbi.nlm.nih.gov/assembly/GCF_009873245.2/
Tursiops truncatas	Common bottlenose dolphin	GCF_011762595.1_mTurTru1.mat.Y	108430135	9729386	https://www.ncbi.nlm.nih.gov/assembly/GCF_011762595.1/
Homo sapiens	Human	hg38	67794873	57879411	https://www.ncbi.nlm.nih.gov/assembly/GCF_000001405.26/
Capra hircus	Domestic goat	ARS1_GCA_001704415.1	87277232	26244591	http://animal.nwsuaf.edu.cn/code/index.php/Ruminantia/loadByGet?address[]=ruminantia/Download/GenoDownload.php
Canis familiaris	Domestic dog	canFam5	64204256	4722218	https://www.ncbi.nlm.nih.gov/assembly/GCF_005444595.1/
Equus caballus	Domestic horse	equCab3	87230776	1502753	https://www.ncbi.nlm.nih.gov/assembly/GCF_002863925.1/
Sus scrofa	Domestic pig	susScr11	88231837	48231277	https://www.ncbi.nlm.nih.gov/assembly/GCA_000003025.6
Camelus ferus	Wild bactrian camel	Cfer_1.0	76025729	5365398	https://www.ncbi.nlm.nih.gov/assembly/GCA_009834535.1
Bos taurus	Cattle	bosTau9	103308737	28896116	https://www.ncbi.nlm.nih.gov/assembly/GCA_002263795.2
