# Supplementary material for: Ruminant-specific retrotransposons shape regulatory evolution of bovine immunity
Source: HighWire-hosted journal article supplement (doi:10.1101/gr.276241.121), 2022-08-01
Supplement: Supplemental_Table_S13.xlsx [file Supplemental_Table_S13.xlsx]

## Sheet: Description
Supplemental Table S13
BLAST-based analysis of presence or absence of different MER41 families (rows) across different genome assemblies (columns, common names)
Include 200bp flanking (100bp per side) & retain hits with E-value <= 1e-50
Output of script by Aurelie Kapusta
https://github.com/4ureliek/TEorthology

## Sheet: Cetartiodactyl MER41
#"Total_hits" means total of hits with evalue less than the one set through -e
#"ortho_hits" means POTENTIALLY orthologous elements = hits that contain at least 20% of the extracted flanking sequence
#	[Query_species]	.	Target_species#(with tree info):
			((alpaca	,	wild_bactrian_camel)	,	(((hippopotamus	,	(blue_whale	,	common_bottlenose_dolphin))	,	(java_mouse_deer	,	(((forest_musk_deer	,	((cattle	,	eastern_bongo)	,	(((scimitar_horned_oryx	,	blue_wildebeest)	,	(domestic_goat	,	sheep))	,	gerenuk)))	,	giraffe)	,	(mule_deer	,	(reeves_muntjac	,	central_european_red_deer)))))	,	domestic_pig));	,
#			alpaca	alpaca	wild_bactrian_camel	wild_bactrian_camel	hippopotamus	hippopotamus	blue_whale	blue_whale	common_bottlenose_dolphin	common_bottlenose_dolphin	java_mouse_deer	java_mouse_deer	forest_musk_deer	forest_musk_deer	cattle	cattle	eastern_bongo	eastern_bongo	scimitar_horned_oryx	scimitar_horned_oryx	blue_wildebeest	blue_wildebeest	domestic_goat	domestic_goat	sheep	sheep	gerenuk	gerenuk	giraffe	giraffe	mule_deer	mule_deer	reeves_muntjac	reeves_muntjac	central_european_red_deer	central_european_red_deer	domestic_pig;	domestic_pig;
#Rname	[name]	[Nb_extracted_seq]	Total_hits	Ortho_hits	Total_hits	Ortho_hits	Total_hits	Ortho_hits	Total_hits	Ortho_hits	Total_hits	Ortho_hits	Total_hits	Ortho_hits	Total_hits	Ortho_hits	Total_hits	Ortho_hits	Total_hits	Ortho_hits	Total_hits	Ortho_hits	Total_hits	Ortho_hits	Total_hits	Ortho_hits	Total_hits	Ortho_hits	Total_hits	Ortho_hits	Total_hits	Ortho_hits	Total_hits	Ortho_hits	Total_hits	Ortho_hits	Total_hits	Ortho_hits	Total_hits	Ortho_hits
MER41_Vpa	alpaca	1715	1449	1327	1428	1227	11	0	46	0	21	0	0	0	0	0	0	0	0	0	0	0	0	0	0	0	0	0	0	0	0	0	0	0	0	0	0	0	0	0
MER41_Vpa	wild_bactrian_camel	1599	4502	1194	1426	1312	704	9	3235	13	2526	13	124	0	308	0	318	1	297	0	297	1	299	3	293	0	281	0	287	1	454	1	334	0	296	0	309	1	358	0
MER41_Vpa	hippopotamus	1182	1253	8	14	0	886	862	7847	350	6385	293	5	5	879	23	895	27	933	28	30	6	840	31	743	32	40	10	819	27	1310	47	33	9	34	17	899	43	729	3
MER41_Vpa	blue_whale	966	2147	7	40	0	500	232	1682	740	1321	536	14	4	93	13	81	21	60	8	91	15	94	21	73	17	87	16	68	9	136	29	97	29	77	22	97	22	3	1
MER41_Vpa	common_bottlenose_dolphin	981	1639	10	17	0	414	200	10679	567	1193	751	7	3	53	12	1156	39	30	7	76	19	1029	49	61	19	72	17	52	13	94	22	73	26	56	19	1100	42	1	1
MER41_Vpa	java_mouse_deer	1177	39	0	0	0	181	20	476	22	418	17	687	676	146	30	162	55	123	38	23	15	147	60	138	47	10	8	138	39	192	56	27	18	22	15	137	34	25	0
MER41_Vpa	forest_musk_deer	1328	123	1	0	0	18	6	1175	33	975	32	13	6	700	691	775	457	777	393	509	367	730	411	723	412	492	353	513	368	524	372	515	397	510	388	635	370	72	0
MER41_Vpa	cattle	1240	158	0	0	0	15	5	1297	47	36	12	23	17	562	410	1032	998	713	562	621	499	2454	553	605	473	604	473	637	490	591	449	625	497	651	499	498	364	0	0
MER41_Vpa	eastern_bongo	1305	122	0	0	0	17	7	1088	27	954	22	13	8	499	345	4206	825	740	737	563	417	2576	475	2703	471	553	400	581	413	541	375	559	413	557	395	1069	356	68	0
MER41_Vpa	scimitar_horned_oryx	1269	157	2	0	0	382	25	1195	39	996	45	150	50	746	416	838	562	837	480	712	705	778	647	794	639	686	611	833	598	775	459	710	470	785	500	660	399	81	0
MER41_Vpa	blue_wildebeest	1324	142	0	0	0	18	9	1182	50	40	18	26	18	520	379	662	523	585	428	704	644	750	737	706	636	704	639	698	578	553	416	515	400	572	445	481	368	0	0
MER41_Vpa	domestic_goat	1260	126	1	0	0	18	8	1155	38	951	38	13	10	482	356	827	567	537	387	664	603	757	636	717	711	704	684	667	570	520	395	485	386	524	415	634	390	0	0
MER41_Vpa	sheep	1237	134	1	1	0	357	32	1125	43	866	36	132	34	850	399	1258	543	1338	454	1276	604	1053	622	1223	678	703	699	1085	594	1349	434	791	445	828	475	636	376	67	0
MER41_Vpa	gerenuk	1433	132	1	1	0	18	9	1053	34	933	36	15	8	3911	425	9700	612	25411	505	712	603	4339	644	4461	662	718	620	858	839	557	406	520	395	548	416	1001	397	68	1
MER41_Vpa	giraffe	1338	220	2	0	0	38	17	1906	64	1439	49	35	17	785	438	829	514	843	435	555	422	776	483	781	478	552	417	810	491	750	730	588	464	608	487	708	450	123	1
MER41_Vpa	mule_deer	1226	166	1	0	0	377	32	1300	51	1104	57	159	42	738	444	843	555	784	415	503	395	721	446	724	451	478	378	763	447	767	496	732	726	691	633	676	510	74	1
MER41_Vpa	reeves_muntjac	1292	157	0	0	0	396	38	1313	44	1042	44	140	39	757	452	868	563	836	449	538	415	777	485	797	484	526	408	816	487	793	524	782	656	831	784	709	529	79	1
MER41_Vpa	central_european_red_deer	1034	159	0	0	0	24	14	1211	44	40	19	23	14	460	320	688	409	477	310	479	345	655	396	454	328	458	328	459	322	520	388	581	499	631	537	625	582	0	0
MER41_Vpa	domestic_pig	896	232	4	0	0	0	0	967	15	771	14	0	0	0	0	81	0	0	0	0	0	82	1	80	1	0	0	0	0	0	0	0	0	0	0	95	0	625	614
MER41B_Vpa	alpaca	978	705	630	718	573	0	0	0	0	0	0	0	0	0	0	0	0	0	0	0	0	0	0	0	0	0	0	0	0	0	0	0	0	0	0	0	0	0	0
MER41B_Vpa	wild_bactrian_camel	845	2044	522	693	601	89	1	243	3	205	2	3	0	14	0	17	0	11	0	10	0	13	0	13	0	13	0	9	0	19	0	12	0	8	0	13	0	17	0
MER41B_Vpa	hippopotamus	77	10	0	0	0	15	15	185	6	110	4	0	0	21	2	21	0	21	1	0	0	13	0	12	0	0	0	14	0	31	0	0	0	0	0	17	1	7	0
MER41B_Vpa	blue_whale	43	29	0	0	0	15	5	49	16	31	10	1	1	2	0	3	0	1	0	3	0	5	1	1	0	1	0	1	0	4	0	1	0	2	0	3	0	0	0
MER41B_Vpa	common_bottlenose_dolphin	40	30	0	0	0	12	4	206	14	26	20	1	1	1	0	22	0	1	0	2	0	21	1	1	0	1	0	2	0	2	1	1	0	1	0	25	1	0	0
MER41B_Vpa	java_mouse_deer	231	0	0	0	0	2	0	2	0	4	0	13	13	3	0	1	0	1	0	0	0	1	0	2	0	0	0	1	0	0	0	0	0	0	0	0	0	0	0
MER41B_Vpa	forest_musk_deer	55	1	0	0	0	0	0	14	1	14	2	2	1	12	12	13	8	18	7	9	6	13	7	12	9	10	9	10	7	9	7	10	7	11	8	15	8	0	0
MER41B_Vpa	cattle	48	2	0	0	0	0	0	7	0	0	0	0	0	11	7	11	11	11	6	9	7	22	7	9	8	9	8	9	6	11	7	7	5	10	7	10	5	0	0
MER41B_Vpa	eastern_bongo	53	0	0	0	0	0	0	11	1	11	1	0	0	7	6	39	5	9	9	8	5	44	6	44	7	7	5	7	5	6	4	9	6	9	8	20	7	0	0
MER41B_Vpa	scimitar_horned_oryx	66	1	0	0	0	7	0	10	0	7	1	6	1	25	6	27	10	29	9	16	16	27	12	26	13	13	10	27	12	26	7	24	9	23	9	15	5	0	0
MER41B_Vpa	blue_wildebeest	61	2	0	0	0	0	0	15	1	0	0	0	0	12	8	14	5	13	7	18	13	20	18	19	14	15	13	19	12	13	9	9	6	10	8	8	5	0	0
MER41B_Vpa	domestic_goat	66	3	0	0	0	0	0	23	0	16	0	0	0	13	11	29	13	17	13	18	15	28	17	20	20	20	20	18	16	12	10	9	8	13	12	25	11	0	0
MER41B_Vpa	sheep	56	1	0	0	0	5	0	7	0	4	0	2	1	24	10	24	11	25	9	26	13	27	12	26	16	17	17	26	15	22	7	20	11	20	12	17	9	0	0
MER41B_Vpa	gerenuk	71	1	0	0	0	0	0	9	1	5	2	1	1	591	13	1469	14	5851	10	17	15	1247	13	690	16	15	13	24	24	8	7	12	9	14	11	85	12	0	0
MER41B_Vpa	giraffe	52	5	0	0	0	0	0	17	1	13	1	1	1	25	6	24	8	25	4	11	8	22	8	27	8	9	8	23	7	14	14	9	4	10	7	18	5	2	0
MER41B_Vpa	mule_deer	51	1	0	0	0	2	0	9	0	9	0	2	0	17	7	18	6	19	6	7	6	14	3	17	7	7	6	18	7	20	4	13	13	11	10	15	9	0	0
MER41B_Vpa	reeves_muntjac	53	0	0	0	0	3	0	6	0	6	0	4	1	19	5	21	3	19	6	5	4	20	7	16	6	5	3	18	5	21	5	18	10	12	12	14	8	0	0
MER41B_Vpa	central_european_red_deer	45	1	0	0	0	0	0	11	0	0	0	0	0	8	4	20	4	9	6	7	5	18	5	8	7	8	7	6	5	9	4	10	10	12	11	12	12	0	0
MER41B_Vpa	domestic_pig	27	1	0	0	0	0	0	1	0	1	0	0	0	0	0	0	0	0	0	0	0	0	0	0	0	0	0	0	0	0	0	0	0	0	0	0	0	2	2
MER41C_Vpa	alpaca	1537	1228	1029	1730	1380	0	0	0	0	0	0	0	0	0	0	0	0	0	0	0	0	0	0	0	0	0	0	0	0	0	0	0	0	0	0	0	0	0	0
MER41C_Vpa	wild_bactrian_camel	1304	4240	854	1262	1063	163	1	567	1	495	1	17	0	56	0	44	0	42	0	29	0	37	0	45	0	37	0	44	0	73	0	43	0	36	0	35	0	58	0
MER41C_Vpa	hippopotamus	358	344	1	0	0	272	262	3456	104	3049	91	5	4	419	11	380	9	470	10	45	3	378	16	277	15	37	3	366	6	625	14	42	3	64	5	429	10	314	0
MER41C_Vpa	blue_whale	284	657	0	1	0	212	76	885	242	714	169	7	2	85	3	80	11	57	5	98	9	95	9	83	7	82	6	85	4	100	6	100	8	137	2	99	6	2	0
MER41C_Vpa	common_bottlenose_dolphin	299	575	1	0	0	206	70	6722	191	753	261	4	3	71	4	682	18	41	4	81	9	649	24	70	11	59	10	63	5	76	10	75	9	110	4	675	12	1	0
MER41C_Vpa	java_mouse_deer	240	10	0	0	0	72	9	286	8	249	10	124	124	71	10	67	16	66	11	9	4	61	14	67	13	5	3	61	8	76	17	9	5	10	8	70	15	12	0
MER41C_Vpa	forest_musk_deer	197	33	0	0	0	13	1	514	12	445	12	5	2	136	136	287	81	310	70	121	77	159	85	256	86	118	79	118	74	118	88	115	76	117	79	151	72	28	0
MER41C_Vpa	cattle	216	33	0	0	0	12	3	585	13	23	7	9	9	134	91	224	224	157	126	147	114	191	117	143	110	146	113	146	109	143	104	154	122	151	119	116	83	0	0
MER41C_Vpa	eastern_bongo	207	35	0	0	0	11	2	539	12	512	8	9	4	119	69	204	130	162	162	135	90	175	97	180	96	134	91	137	94	129	82	129	87	132	93	163	78	31	0
MER41C_Vpa	scimitar_horned_oryx	222	40	0	0	0	133	10	546	18	463	19	72	12	195	93	193	116	188	105	161	160	182	153	178	148	158	142	190	130	218	109	178	101	198	107	180	87	38	0
MER41C_Vpa	blue_wildebeest	219	38	1	0	0	13	3	522	21	31	11	10	6	124	81	148	112	147	103	160	150	168	165	157	144	158	144	158	124	141	104	128	93	139	101	117	81	0	0
MER41C_Vpa	domestic_goat	217	27	0	0	0	15	4	579	19	468	19	12	7	125	82	186	108	135	92	151	134	174	145	156	154	151	145	151	115	138	101	134	93	136	98	168	86	0	0
MER41C_Vpa	sheep	211	36	0	0	0	120	14	538	18	447	22	61	6	188	90	184	115	193	100	170	135	173	140	171	151	152	152	177	116	213	108	190	104	191	105	165	84	33	0
MER41C_Vpa	gerenuk	211	23	0	0	0	13	2	405	7	383	7	7	2	178	85	197	103	196	98	149	122	184	125	181	119	144	114	165	160	130	91	119	83	128	94	160	77	22	0
MER41C_Vpa	giraffe	217	55	0	0	0	22	4	833	19	718	21	14	9	197	106	218	103	206	91	140	104	208	109	190	113	132	101	207	101	169	166	143	110	144	114	186	95	49	1
MER41C_Vpa	mule_deer	204	45	0	0	0	125	9	525	24	498	22	63	15	185	94	177	100	180	88	125	93	168	100	172	104	125	92	177	88	205	108	151	150	146	133	175	110	32	0
MER41C_Vpa	reeves_muntjac	223	46	0	0	0	136	13	627	13	572	19	67	16	193	98	198	108	196	100	131	99	177	104	182	110	128	97	202	101	224	113	191	137	161	157	186	113	35	0
MER41C_Vpa	central_european_red_deer	173	37	0	0	0	13	1	559	13	29	4	10	5	100	69	153	87	107	71	106	77	152	82	105	75	105	74	106	66	122	85	130	109	131	112	130	120	0	0
MER41C_Vpa	domestic_pig	121	26	1	0	0	0	0	181	3	148	3	0	0	0	0	24	0	0	0	0	0	23	1	16	0	0	0	0	0	0	0	0	0	0	0	28	0	95	93
MER41C1_Vpa	alpaca	1177	3173	694	3635	698	0	0	0	0	0	0	0	0	0	0	0	0	0	0	0	0	0	0	0	0	0	0	0	0	0	0	0	0	0	0	0	0	0	0
MER41C1_Vpa	wild_bactrian_camel	1026	8002	565	3804	720	13	0	29	0	19	0	0	0	2	0	3	0	1	0	0	0	2	0	4	0	1	0	3	0	5	0	0	0	1	0	2	0	2	0
MER41C1_Vpa	hippopotamus	29	9	0	0	0	4	4	54	1	33	1	0	0	4	0	5	0	5	0	0	0	4	0	3	0	0	0	4	0	8	0	0	0	0	0	4	0	2	0
MER41C1_Vpa	blue_whale	23	2	0	0	0	2	2	3	3	3	3	0	0	0	0	0	0	0	0	0	0	0	0	0	0	0	0	0	0	0	0	0	0	0	0	0	0	0	0
MER41C1_Vpa	common_bottlenose_dolphin	26	3	0	0	0	2	2	27	5	5	4	0	0	1	0	4	0	1	0	0	0	4	0	1	0	1	0	0	0	1	0	1	0	0	0	3	0	0	0
MER41C1_Vpa	java_mouse_deer	25	0	0	0	0	1	0	1	0	1	0	8	7	2	1	2	1	3	2	0	0	2	1	3	2	0	0	3	2	2	0	0	0	0	0	1	0	0	0
MER41C1_Vpa	forest_musk_deer	34	0	0	0	0	0	0	2	0	3	0	0	0	4	4	4	1	4	3	2	2	7	1	5	1	2	1	2	1	2	1	3	2	3	2	5	2	0	0
MER41C1_Vpa	cattle	24	1	0	0	0	0	0	7	1	0	0	0	0	5	3	5	5	5	4	4	2	4	3	4	3	4	3	4	2	4	1	4	3	5	3	2	1	0	0
MER41C1_Vpa	eastern_bongo	27	0	0	0	0	0	0	4	0	4	0	0	0	4	2	8	3	4	4	4	3	8	3	4	3	4	3	4	2	4	3	4	2	3	1	5	1	1	0
MER41C1_Vpa	scimitar_horned_oryx	39	1	0	0	0	2	0	13	1	12	1	2	0	9	2	7	4	8	1	5	5	5	5	6	4	5	4	6	4	6	5	7	4	5	3	7	4	1	0
MER41C1_Vpa	blue_wildebeest	45	1	0	0	0	0	0	6	1	1	1	0	0	4	2	4	2	4	1	4	4	5	5	4	4	4	4	4	4	5	3	4	3	4	2	3	2	0	0
MER41C1_Vpa	domestic_goat	42	1	0	0	0	0	0	7	1	6	0	0	0	7	4	9	4	6	2	7	7	7	7	7	7	7	7	6	4	7	5	7	7	7	6	5	5	0	0
MER41C1_Vpa	sheep	34	1	0	0	0	3	0	4	1	7	0	1	1	8	1	7	2	7	2	5	4	5	4	5	5	5	5	5	3	5	5	5	5	5	4	5	4	1	0
MER41C1_Vpa	gerenuk	32	6	0	0	0	1	1	23	1	16	1	0	0	43	2	87	2	124	3	9	7	54	6	58	6	10	6	10	10	10	4	10	6	9	4	31	4	3	0
MER41C1_Vpa	giraffe	38	0	0	0	0	1	1	11	0	7	0	1	1	193	3	230	2	418	3	3	3	158	3	169	3	3	3	135	3	6	6	5	4	3	3	180	3	0	0
MER41C1_Vpa	mule_deer	50	0	0	0	0	3	0	18	0	29	1	2	0	16	3	15	5	13	5	4	4	17	5	12	5	4	4	13	6	31	6	8	7	5	5	10	5	0	0
MER41C1_Vpa	reeves_muntjac	30	0	0	0	0	1	0	4	0	3	0	0	0	8	4	9	5	11	5	4	4	10	5	8	4	4	3	5	4	18	5	11	6	6	6	6	4	0	0
MER41C1_Vpa	central_european_red_deer	22	1	0	0	0	1	0	23	1	1	0	0	0	4	0	7	1	3	1	3	2	6	4	2	1	3	2	4	3	5	4	5	4	4	3	7	7	0	0
MER41C1_Vpa	domestic_pig	10	1	0	0	0	0	0	7	0	10	0	0	0	0	0	1	0	0	0	0	0	1	0	1	0	0	0	0	0	0	0	0	0	0	0	1	0	2	2
MER41C2_Vpa	alpaca	2718	8324	1911	11951	2693	0	0	0	0	0	0	0	0	0	0	0	0	0	0	0	0	0	0	0	0	0	0	0	0	0	0	0	0	0	0	0	0	0	0
MER41C2_Vpa	wild_bactrian_camel	2158	40998	1474	12830	1960	123	0	292	0	236	0	1	0	25	0	12	0	6	0	12	0	10	0	12	0	15	0	15	0	23	0	10	0	6	0	4	0	21	0
MER41C2_Vpa	hippopotamus	29	37	0	0	0	20	20	152	4	136	6	1	1	23	1	21	2	26	2	3	1	25	2	19	3	2	1	20	2	30	1	1	1	2	1	19	3	15	0
MER41C2_Vpa	blue_whale	29	43	0	0	0	11	5	22	18	20	13	0	0	3	1	5	0	1	0	5	1	5	1	2	0	1	0	3	0	5	2	4	2	2	1	5	2	0	0
MER41C2_Vpa	common_bottlenose_dolphin	31	20	0	0	0	7	4	173	13	20	17	0	0	1	0	16	0	1	0	2	0	16	0	1	0	2	0	1	0	2	0	0	0	0	0	16	0	0	0
MER41C2_Vpa	java_mouse_deer	44	0	0	0	0	3	0	5	0	4	0	19	19	5	1	6	2	4	1	0	0	5	2	5	1	0	0	4	1	9	2	0	0	0	0	4	0	0	0
MER41C2_Vpa	forest_musk_deer	51	2	0	0	0	0	0	20	2	16	1	0	0	21	21	30	10	30	13	19	12	31	13	33	13	21	13	21	14	16	11	15	12	15	12	23	14	4	0
MER41C2_Vpa	cattle	46	3	0	0	0	0	0	48	2	0	0	0	0	17	13	21	21	19	15	18	14	26	12	18	12	18	12	18	14	18	15	15	11	16	11	15	10	0	0
MER41C2_Vpa	eastern_bongo	44	0	0	0	0	0	0	16	5	13	3	0	0	19	13	148	18	22	22	21	16	121	14	142	13	21	14	21	16	19	14	18	13	17	11	106	10	0	0
MER41C2_Vpa	scimitar_horned_oryx	57	1	0	0	0	12	1	29	0	28	0	9	1	691	18	564	14	790	14	23	23	367	22	536	19	23	17	436	18	592	17	292	16	1068	17	145	14	1	0
MER41C2_Vpa	blue_wildebeest	49	3	0	0	0	0	0	28	1	1	1	3	1	20	15	21	14	22	12	22	21	23	23	22	19	22	18	21	18	19	17	17	13	19	16	17	12	0	0
MER41C2_Vpa	domestic_goat	44	3	0	0	0	1	0	31	0	32	0	0	0	14	9	23	11	14	9	18	14	20	14	20	19	19	16	17	12	16	12	14	11	14	11	19	13	0	0
MER41C2_Vpa	sheep	52	1	0	0	0	8	2	21	1	29	0	5	1	138	12	449	11	898	11	44	17	298	17	22	17	17	17	357	13	205	15	50	14	25	14	33	13	1	0
MER41C2_Vpa	gerenuk	51	2	0	0	0	1	1	31	3	28	4	0	0	346	18	338	17	439	15	25	21	182	20	270	19	23	20	26	25	22	19	19	18	21	18	46	17	3	0
MER41C2_Vpa	giraffe	49	2	0	0	0	1	0	40	2	31	2	1	0	123	15	141	16	192	12	16	14	100	15	139	14	15	11	87	17	21	21	17	16	13	10	76	14	3	0
MER41C2_Vpa	mule_deer	52	2	0	0	0	20	2	66	4	53	8	41	6	783	25	593	15	1101	17	28	25	506	20	511	20	24	18	822	22	2888	24	30	30	25	20	494	21	1	0
MER41C2_Vpa	reeves_muntjac	51	5	0	0	0	18	3	42	1	39	1	8	4	36	18	31	15	25	15	22	18	69	16	38	18	19	15	33	18	43	21	32	22	25	25	26	18	2	0
MER41C2_Vpa	central_european_red_deer	42	5	0	0	0	1	0	35	1	1	0	1	1	18	14	24	12	14	7	16	13	26	12	15	11	17	11	15	12	18	15	20	17	22	18	21	20	0	0
MER41C2_Vpa	domestic_pig	24	7	0	0	0	0	0	29	1	18	2	0	0	0	0	4	0	0	0	0	0	2	0	2	0	0	0	0	0	0	0	0	0	0	0	4	0	18	18
MER41D_Vpa	alpaca	1789	1467	954	1448	846	0	0	0	0	0	0	0	0	0	0	0	0	0	0	0	0	0	0	0	0	0	0	0	0	0	0	0	0	0	0	0	0	0	0
MER41D_Vpa	wild_bactrian_camel	1644	5560	829	1447	947	53	0	177	0	108	0	3	0	16	0	11	0	8	0	9	0	9	0	9	0	7	0	9	0	13	0	5	0	10	0	7	0	8	0
MER41D_Vpa	hippopotamus	978	22	0	0	0	1700	1378	7131	121	5683	141	0	0	587	27	602	19	727	23	1	0	484	30	423	24	1	0	470	22	1010	40	1	0	3	1	609	30	68	5
MER41D_Vpa	blue_whale	255	77	0	0	0	55	38	145	128	127	97	0	0	2	2	2	0	0	0	2	1	3	1	0	0	1	0	1	0	2	0	3	1	5	2	7	4	0	0
MER41D_Vpa	common_bottlenose_dolphin	258	45	0	0	0	44	28	1220	180	131	108	0	0	2	1	132	33	0	0	3	1	119	37	2	0	2	0	2	0	2	0	2	0	2	0	130	43	0	0
MER41D_Vpa	java_mouse_deer	286	1	0	0	0	12	2	34	3	34	3	57	57	14	1	12	2	7	4	2	1	9	1	12	2	2	1	9	2	19	4	2	1	2	1	13	3	1	0
MER41D_Vpa	forest_musk_deer	265	1	0	0	0	0	0	76	16	77	14	0	0	58	57	68	34	72	30	40	26	66	34	70	35	39	30	37	26	45	37	37	29	44	33	59	34	2	0
MER41D_Vpa	cattle	296	2	0	0	0	1	0	102	12	1	0	0	0	35	24	60	59	52	45	47	39	95	43	49	39	49	39	49	40	48	34	41	29	44	32	39	26	0	0
MER41D_Vpa	eastern_bongo	273	2	0	0	0	1	0	120	13	106	12	0	0	36	20	875	44	63	61	55	37	518	42	738	43	53	39	54	41	49	35	39	25	45	29	131	27	2	1
MER41D_Vpa	scimitar_horned_oryx	299	1	0	0	0	38	11	132	23	126	18	23	6	72	34	73	41	75	39	61	60	71	58	74	60	59	56	81	56	85	49	69	39	79	44	59	35	3	0
MER41D_Vpa	blue_wildebeest	286	0	0	0	0	0	0	143	12	0	0	1	1	39	35	51	39	47	32	54	50	59	59	56	52	56	54	52	47	41	38	35	29	40	33	37	28	0	0
MER41D_Vpa	domestic_goat	262	2	0	0	0	1	0	139	12	115	10	1	1	35	23	167	36	40	32	57	52	514	52	61	60	59	57	50	45	38	34	39	28	37	30	71	31	0	0
MER41D_Vpa	sheep	265	2	0	0	0	35	7	126	12	97	13	17	4	79	35	81	37	82	44	73	53	75	54	75	57	61	61	79	51	74	39	72	33	85	37	59	29	2	0
MER41D_Vpa	gerenuk	296	2	0	0	0	0	0	130	14	115	10	0	0	186	39	496	38	793	44	63	55	236	56	228	57	63	52	78	76	53	42	42	33	48	35	97	35	2	0
MER41D_Vpa	giraffe	297	3	0	0	0	0	0	197	14	160	16	2	2	537	36	678	43	2014	34	40	35	296	47	561	44	38	35	434	46	62	62	42	35	43	39	89	33	9	1
MER41D_Vpa	mule_deer	250	0	0	0	0	35	6	151	13	115	17	16	4	59	28	88	32	84	28	35	28	69	35	77	32	34	28	66	33	119	37	50	49	48	45	66	37	3	0
MER41D_Vpa	reeves_muntjac	281	7	0	0	0	36	1	161	12	119	18	21	3	69	35	77	33	77	35	42	33	70	40	71	35	39	29	66	36	86	46	74	53	58	58	67	46	4	1
MER41D_Vpa	central_european_red_deer	231	2	0	0	0	1	1	116	15	3	1	2	2	33	25	61	24	32	21	33	28	61	33	34	23	32	25	36	23	36	26	41	37	49	45	50	49	0	0
MER41D_Vpa	domestic_pig	204	6	0	0	0	0	0	84	0	65	0	0	0	0	0	11	0	0	0	0	0	9	0	7	0	0	0	0	0	0	0	0	0	0	0	9	0	41	40
MER41_SS-LTR	alpaca	0	0	0	0	0	0	0	0	0	0	0	0	0	0	0	0	0	0	0	0	0	0	0	0	0	0	0	0	0	0	0	0	0	0	0	0	0	0	0
MER41_SS-LTR	wild_bactrian_camel	0	0	0	0	0	0	0	0	0	0	0	0	0	0	0	0	0	0	0	0	0	0	0	0	0	0	0	0	0	0	0	0	0	0	0	0	0	0	0
MER41_SS-LTR	hippopotamus	342	0	0	0	0	138	136	256	39	209	29	1	0	106	2	122	2	132	4	14	0	112	2	124	3	10	0	111	3	155	6	15	0	19	0	114	1	273	0
MER41_SS-LTR	blue_whale	259	0	0	0	0	73	28	161	126	134	85	5	0	31	0	30	0	26	0	29	0	26	0	25	0	26	0	24	0	35	0	33	0	31	1	30	0	36	1
MER41_SS-LTR	common_bottlenose_dolphin	258	0	0	0	0	55	19	232	84	118	105	3	0	26	2	113	2	23	1	22	0	105	2	22	0	22	0	18	1	30	1	25	0	28	1	101	3	32	0
MER41_SS-LTR	java_mouse_deer	4709	0	0	0	0	45	2	71	0	59	0	8039	6367	42	8	52	9	38	4	4	4	31	9	31	6	3	2	42	6	59	14	4	3	6	5	45	7	7	0
MER41_SS-LTR	forest_musk_deer	494	0	0	0	0	10	0	152	2	122	2	7	5	170	167	210	119	185	98	125	86	176	99	183	108	143	96	127	89	130	108	127	103	127	106	164	92	102	0
MER41_SS-LTR	cattle	484	0	0	0	0	12	0	160	3	14	2	5	4	150	111	234	234	153	121	145	117	231	126	158	124	194	150	163	121	130	108	139	112	145	114	125	89	1	0
MER41_SS-LTR	eastern_bongo	478	0	0	0	0	11	0	136	2	122	3	0	0	128	85	201	143	160	160	134	99	178	104	177	107	150	108	139	94	130	96	122	89	133	101	162	85	46	0
MER41_SS-LTR	scimitar_horned_oryx	517	0	0	0	0	95	4	164	3	125	2	36	7	207	107	210	142	197	115	177	177	184	158	186	159	178	159	210	141	189	127	192	125	206	123	176	96	71	0
MER41_SS-LTR	blue_wildebeest	488	0	0	0	0	12	1	139	4	15	2	3	3	127	92	157	128	135	102	159	151	170	165	155	140	166	145	154	124	132	105	129	102	132	104	106	76	1	0
MER41_SS-LTR	domestic_goat	529	0	0	0	0	11	0	147	3	125	2	2	2	167	110	303	206	148	113	170	156	208	151	181	181	231	202	189	142	139	114	151	118	157	112	201	98	0	0
MER41_SS-LTR	sheep	489	0	0	0	0	88	2	147	2	114	2	32	4	206	104	220	150	182	114	171	149	184	142	174	163	193	183	197	130	176	120	182	116	186	114	170	86	54	0
MER41_SS-LTR	gerenuk	548	0	0	0	0	11	0	134	4	121	2	2	2	206	104	229	145	187	109	155	125	190	134	196	134	171	131	193	185	133	100	125	93	129	96	169	81	59	0
MER41_SS-LTR	giraffe	480	0	0	0	0	21	0	213	7	175	9	6	5	208	126	205	133	223	115	139	110	209	118	197	127	141	114	211	113	183	183	147	131	153	133	190	123	135	2
MER41_SS-LTR	mule_deer	473	0	0	0	0	94	2	137	2	126	3	42	12	207	117	241	121	248	98	124	97	194	110	208	115	133	100	198	107	188	137	174	171	163	149	174	117	68	0
MER41_SS-LTR	reeves_muntjac	506	0	0	0	0	93	4	152	6	126	3	46	15	198	121	217	129	197	99	130	93	185	107	191	114	139	100	202	100	202	138	192	158	193	186	172	128	56	0
MER41_SS-LTR	central_european_red_deer	385	0	0	0	0	13	0	137	3	21	1	4	4	102	78	169	90	104	68	103	73	160	81	110	84	113	81	96	64	119	100	133	110	138	119	145	135	0	0
MER41_SS-LTR	domestic_pig	1764	0	0	0	0	30	0	623	0	592	0	0	0	0	0	212	0	0	0	1	0	187	0	181	0	0	0	0	0	3	0	2	0	1	0	169	0	1619	940
MER41B_SS-LTR	alpaca	0	0	0	0	0	0	0	0	0	0	0	0	0	0	0	0	0	0	0	0	0	0	0	0	0	0	0	0	0	0	0	0	0	0	0	0	0	0	0
MER41B_SS-LTR	wild_bactrian_camel	0	0	0	0	0	0	0	0	0	0	0	0	0	0	0	0	0	0	0	0	0	0	0	0	0	0	0	0	0	0	0	0	0	0	0	0	0	0	0
MER41B_SS-LTR	hippopotamus	253	0	0	0	0	45	44	219	11	176	5	0	0	44	1	39	0	46	0	4	0	52	1	43	0	4	0	38	0	82	1	3	0	3	0	57	1	34	0
MER41B_SS-LTR	blue_whale	137	0	0	0	0	18	6	38	33	34	22	2	0	6	0	7	0	9	0	5	0	5	0	6	0	5	0	6	0	6	0	7	0	9	0	9	0	0	0
MER41B_SS-LTR	common_bottlenose_dolphin	104	0	0	0	0	12	3	170	25	32	31	0	0	7	0	48	0	6	0	7	0	58	0	7	0	6	0	5	0	9	0	7	0	8	0	64	1	0	0
MER41B_SS-LTR	java_mouse_deer	11004	0	0	0	0	52	0	92	1	98	0	18541	15428	149	12	199	12	185	7	16	6	145	13	146	11	12	4	147	7	268	19	15	5	12	4	158	12	9	0
MER41B_SS-LTR	forest_musk_deer	265	0	0	0	0	1	0	193	5	247	2	23	8	154	122	324	95	334	84	127	79	272	79	266	82	123	77	117	75	141	83	127	85	139	83	295	74	49	0
MER41B_SS-LTR	cattle	266	0	0	0	0	1	0	179	1	3	0	20	5	130	81	170	146	122	80	111	75	295	84	111	71	149	81	132	72	115	74	110	68	116	75	103	55	0	0
MER41B_SS-LTR	eastern_bongo	283	0	0	0	0	2	0	127	3	159	3	11	6	103	73	274	90	116	113	105	72	247	73	237	81	116	80	101	70	104	71	94	64	99	65	225	54	28	0
MER41B_SS-LTR	scimitar_horned_oryx	270	0	0	0	0	90	1	158	1	161	1	104	9	254	82	248	88	278	75	119	116	229	98	205	106	129	104	215	94	374	84	210	78	298	77	228	61	29	0
MER41B_SS-LTR	blue_wildebeest	281	0	0	0	0	1	0	175	2	6	0	18	4	123	78	142	99	125	79	129	106	136	121	122	102	128	101	124	100	125	87	109	79	121	76	106	61	0	0
MER41B_SS-LTR	domestic_goat	275	0	0	0	0	0	0	133	0	131	0	10	3	113	71	270	104	109	75	112	97	229	95	121	116	165	121	113	81	99	70	95	66	108	69	195	64	0	0
MER41B_SS-LTR	sheep	309	0	0	0	0	92	1	174	1	169	1	90	9	278	89	306	98	289	88	240	107	268	105	253	124	153	130	243	100	413	97	239	83	324	85	231	66	22	0
MER41B_SS-LTR	gerenuk	301	0	0	0	0	1	0	175	1	186	1	10	4	268	89	261	91	236	71	123	94	225	100	216	99	125	94	150	135	116	83	98	74	102	72	229	66	16	0
MER41B_SS-LTR	giraffe	284	0	0	0	0	4	0	280	3	336	2	29	9	624	106	643	116	889	96	142	91	730	104	543	104	142	94	466	96	200	152	143	100	168	106	451	98	60	0
MER41B_SS-LTR	mule_deer	265	0	0	0	0	118	1	246	2	279	0	119	16	316	99	351	97	390	90	124	77	286	92	283	94	126	83	286	91	573	112	161	142	161	122	332	102	21	0
MER41B_SS-LTR	reeves_muntjac	295	0	0	0	0	105	1	224	0	222	0	113	20	317	99	342	112	333	90	124	76	280	89	258	90	123	78	276	88	547	117	300	126	169	149	306	87	29	0
MER41B_SS-LTR	central_european_red_deer	239	0	0	0	0	2	0	232	1	6	0	22	9	136	85	353	88	119	69	117	71	290	82	110	72	122	73	112	71	137	89	134	105	148	107	143	124	0	0
MER41B_SS-LTR	domestic_pig	3020	0	0	0	0	1	0	315	0	229	0	0	0	0	0	65	0	0	0	0	0	52	0	48	0	0	0	0	0	0	0	0	0	0	0	49	0	1759	1012
MER41C_SS-LTR	alpaca	0	0	0	0	0	0	0	0	0	0	0	0	0	0	0	0	0	0	0	0	0	0	0	0	0	0	0	0	0	0	0	0	0	0	0	0	0	0	0
MER41C_SS-LTR	wild_bactrian_camel	0	0	0	0	0	0	0	0	0	0	0	0	0	0	0	0	0	0	0	0	0	0	0	0	0	0	0	0	0	0	0	0	0	0	0	0	0	0	0
MER41C_SS-LTR	hippopotamus	191	0	0	0	0	167	150	788	47	642	38	12	0	276	6	304	4	296	2	43	2	232	3	231	4	39	2	211	3	421	3	39	3	42	4	185	3	206	0
MER41C_SS-LTR	blue_whale	162	0	0	0	0	154	39	457	144	362	89	41	3	75	3	92	1	73	4	74	4	76	3	80	2	94	2	59	4	118	5	69	2	77	6	72	3	70	0
MER41C_SS-LTR	common_bottlenose_dolphin	158	0	0	0	0	123	28	948	92	312	137	25	1	49	3	362	2	49	2	56	4	282	4	60	2	61	2	46	3	88	3	53	1	55	4	184	4	46	0
MER41C_SS-LTR	java_mouse_deer	772	0	0	0	0	65	3	130	6	95	4	1115	1094	62	2	78	26	64	15	5	3	61	10	67	11	8	2	61	11	87	15	6	3	14	7	69	23	20	0
MER41C_SS-LTR	forest_musk_deer	257	0	0	0	0	18	2	240	3	216	5	4	0	158	154	255	80	259	80	123	75	224	85	214	81	116	68	121	70	124	76	111	79	117	74	157	63	52	0
MER41C_SS-LTR	cattle	249	0	0	0	0	20	2	215	4	36	1	7	3	125	66	188	184	138	106	148	106	249	107	167	120	164	122	166	123	124	78	120	80	117	75	96	57	0	0
MER41C_SS-LTR	eastern_bongo	258	0	0	0	0	12	1	187	4	192	2	5	1	112	64	232	122	157	153	133	93	209	93	218	105	141	96	147	100	120	70	109	72	113	73	151	67	47	0
MER41C_SS-LTR	scimitar_horned_oryx	264	0	0	0	0	110	6	224	7	196	4	49	8	202	86	637	123	1296	102	174	173	396	158	413	159	170	154	454	146	226	103	183	110	218	110	164	73	57	0
MER41C_SS-LTR	blue_wildebeest	271	0	0	0	0	21	2	264	4	46	3	8	3	117	63	149	95	130	79	158	146	171	162	162	138	163	142	166	124	112	72	113	75	121	78	99	55	0	0
MER41C_SS-LTR	domestic_goat	245	0	0	0	0	17	3	235	4	212	5	7	3	111	61	308	142	133	85	164	153	253	154	195	191	196	191	189	148	115	75	117	80	120	75	160	67	1	0
MER41C_SS-LTR	sheep	255	0	0	0	0	97	2	182	2	174	2	53	4	181	76	225	128	191	92	185	153	199	147	209	181	190	185	230	151	210	92	174	92	209	92	150	62	47	0
MER41C_SS-LTR	gerenuk	282	0	0	0	0	16	2	205	7	206	3	6	2	189	76	254	148	205	105	180	141	243	136	257	162	197	157	240	225	118	69	117	71	126	73	161	66	42	0
MER41C_SS-LTR	giraffe	276	0	0	0	0	29	1	274	11	273	9	14	1	223	88	241	94	232	88	114	81	224	99	207	94	113	80	220	99	160	154	125	89	128	89	170	76	66	1
MER41C_SS-LTR	mule_deer	225	0	0	0	0	103	4	220	7	198	7	61	11	185	87	194	93	175	86	115	86	183	93	177	91	111	76	197	92	207	102	157	155	147	128	166	96	46	0
MER41C_SS-LTR	reeves_muntjac	244	0	0	0	0	115	11	249	11	233	11	59	7	201	91	210	104	195	95	119	86	193	97	189	97	113	80	212	96	235	104	193	148	182	177	175	112	49	0
MER41C_SS-LTR	central_european_red_deer	189	0	0	0	0	12	3	190	7	25	1	11	2	91	54	143	64	95	60	90	61	142	65	91	56	88	57	93	58	105	70	109	90	116	99	121	109	1	1
MER41C_SS-LTR	domestic_pig	276	0	0	0	0	25	0	292	0	278	0	0	0	1	0	74	0	0	0	0	0	63	0	57	0	0	0	0	0	0	0	0	0	0	0	61	0	191	186
MER41D_SS-LTR	alpaca	0	0	0	0	0	0	0	0	0	0	0	0	0	0	0	0	0	0	0	0	0	0	0	0	0	0	0	0	0	0	0	0	0	0	0	0	0	0	0
MER41D_SS-LTR	wild_bactrian_camel	0	0	0	0	0	0	0	0	0	0	0	0	0	0	0	0	0	0	0	0	0	0	0	0	0	0	0	0	0	0	0	0	0	0	0	0	0	0	0
MER41D_SS-LTR	hippopotamus	76	0	0	0	0	24	20	47	2	29	1	1	0	22	1	20	0	31	0	8	0	26	1	25	0	6	0	23	1	34	0	7	0	8	0	31	0	54	0
MER41D_SS-LTR	blue_whale	60	0	0	0	0	10	1	23	17	18	12	2	0	7	0	8	0	12	0	8	0	8	0	8	0	7	0	8	0	11	0	11	0	9	0	8	0	0	0
MER41D_SS-LTR	common_bottlenose_dolphin	51	0	0	0	0	6	0	25	6	11	10	0	0	3	0	13	0	5	0	4	0	11	0	4	0	4	0	3	0	4	0	3	0	5	0	18	0	0	0
MER41D_SS-LTR	java_mouse_deer	715	0	0	0	0	3	0	6	0	3	0	592	533	3	1	4	0	6	0	1	1	4	1	4	1	1	1	3	1	5	0	0	0	0	0	2	0	0	0
MER41D_SS-LTR	forest_musk_deer	74	0	0	0	0	3	0	16	1	13	1	1	0	12	12	18	7	19	8	12	7	17	8	20	8	10	8	8	7	10	9	9	7	7	6	21	6	14	0
MER41D_SS-LTR	cattle	68	0	0	0	0	4	0	22	0	2	0	1	0	16	10	15	15	12	8	14	10	21	8	14	9	14	9	10	6	14	11	14	11	14	10	12	9	0	0
MER41D_SS-LTR	eastern_bongo	76	0	0	0	0	2	0	15	0	8	0	0	0	9	6	12	7	10	10	8	3	10	5	10	4	8	4	6	4	8	6	7	5	8	6	13	6	8	0
MER41D_SS-LTR	scimitar_horned_oryx	70	0	0	0	0	8	1	11	1	11	1	10	0	25	9	24	9	28	8	12	12	26	10	26	11	13	11	25	9	36	8	22	7	44	7	20	7	3	0
MER41D_SS-LTR	blue_wildebeest	62	0	0	0	0	2	0	20	0	1	0	0	0	8	6	7	4	6	5	8	6	7	7	7	6	7	6	6	5	5	4	5	4	7	5	5	4	0	0
MER41D_SS-LTR	domestic_goat	74	0	0	0	0	2	0	11	1	11	0	0	0	13	12	23	10	11	9	14	11	26	12	13	13	13	13	13	10	12	11	11	9	10	7	22	7	0	0
MER41D_SS-LTR	sheep	71	0	0	0	0	9	1	12	2	10	1	2	1	15	10	16	9	16	6	17	10	14	11	15	12	12	12	16	6	14	8	12	6	21	4	12	6	4	0
MER41D_SS-LTR	gerenuk	81	0	0	0	0	2	0	22	1	18	0	0	0	13	8	13	7	13	6	12	5	16	8	14	7	12	7	13	13	9	8	6	5	7	6	11	6	7	0
MER41D_SS-LTR	giraffe	78	0	0	0	0	2	0	28	0	29	0	1	1	15	10	15	9	19	8	11	7	17	6	17	8	9	6	14	8	16	15	10	7	11	8	16	5	20	0
MER41D_SS-LTR	mule_deer	84	0	0	0	0	10	2	14	0	16	0	2	0	20	12	20	9	19	6	11	8	18	8	16	9	12	9	25	9	22	12	15	15	15	15	18	11	11	0
MER41D_SS-LTR	reeves_muntjac	77	0	0	0	0	10	0	20	1	13	1	3	0	21	10	20	8	20	10	16	12	18	9	18	13	15	12	20	8	21	10	17	17	19	19	19	13	9	0
MER41D_SS-LTR	central_european_red_deer	61	0	0	0	0	3	0	9	2	3	0	0	0	10	7	12	8	8	6	10	7	9	4	10	5	9	5	8	5	10	8	11	11	12	10	12	12	0	0
MER41D_SS-LTR	domestic_pig	2464	0	0	0	0	0	0	411	0	293	0	0	0	0	0	22	0	0	0	0	0	43	0	24	0	0	0	0	0	0	0	0	0	0	0	35	0	8286	1674
MER41_Ttr-LTR	alpaca	0	0	0	0	0	0	0	0	0	0	0	0	0	0	0	0	0	0	0	0	0	0	0	0	0	0	0	0	0	0	0	0	0	0	0	0	0	0	0
MER41_Ttr-LTR	wild_bactrian_camel	0	0	0	0	0	0	0	0	0	0	0	0	0	0	0	0	0	0	0	0	0	0	0	0	0	0	0	0	0	0	0	0	0	0	0	0	0	0	0
MER41_Ttr-LTR	hippopotamus	657	0	0	0	0	443	387	2403	189	2432	198	30	0	991	72	772	55	1419	71	127	0	839	50	711	62	110	0	699	49	1843	107	69	0	74	1	792	60	232	2
MER41_Ttr-LTR	blue_whale	297	0	0	0	0	179	36	606	206	534	137	71	0	151	1	133	1	128	0	202	1	152	0	134	0	162	1	139	1	184	2	125	1	127	2	138	2	23	0
MER41_Ttr-LTR	common_bottlenose_dolphin	292	0	0	0	0	165	28	1521	140	487	207	42	0	103	0	604	2	104	0	138	0	565	3	100	0	111	1	99	0	145	1	100	0	100	1	444	2	17	0
MER41_Ttr-LTR	java_mouse_deer	1259	0	0	0	0	336	0	645	2	589	1	886	849	626	69	608	75	607	59	36	26	566	66	501	67	35	22	495	55	829	89	31	22	28	20	571	62	27	0
MER41_Ttr-LTR	forest_musk_deer	1245	0	0	0	0	43	1	1248	6	1274	3	32	20	915	878	1548	601	1673	572	714	521	1504	594	1372	587	673	509	685	506	734	559	690	542	710	551	1376	489	57	0
MER41_Ttr-LTR	cattle	1242	0	0	0	0	52	2	1221	5	98	1	38	25	716	517	930	899	808	645	792	595	1490	635	786	576	767	577	765	572	725	540	687	525	724	552	587	427	0	0
MER41_Ttr-LTR	eastern_bongo	1260	0	0	0	0	42	0	1129	4	1139	4	27	17	675	478	1353	669	880	860	722	530	1348	593	1267	588	706	519	717	515	650	471	636	481	668	477	1201	448	54	0
MER41_Ttr-LTR	scimitar_horned_oryx	1287	0	0	0	0	625	1	1292	6	1281	2	598	72	1500	593	1524	670	1702	617	916	892	1498	818	1403	808	846	767	1470	767	2283	622	1321	620	1784	624	1340	479	62	0
MER41_Ttr-LTR	blue_wildebeest	1294	0	0	0	0	45	0	1236	5	93	0	29	21	720	525	830	610	745	539	898	803	961	917	878	765	861	758	874	711	722	542	687	527	719	539	594	428	0	0
MER41_Ttr-LTR	domestic_goat	1244	0	0	0	0	48	1	1098	6	1115	2	30	19	680	504	1421	640	722	524	853	763	1374	769	893	866	856	811	826	692	703	532	670	511	696	528	1216	472	0	0
MER41_Ttr-LTR	sheep	1188	0	0	0	0	532	1	1080	6	1091	4	512	58	1319	566	1378	631	1474	588	1287	764	1330	758	1226	820	867	846	1302	715	1873	587	1183	596	1589	606	1180	466	55	0
MER41_Ttr-LTR	gerenuk	1398	0	0	0	0	35	1	1131	9	1125	7	29	18	1465	605	1549	671	1835	617	859	718	1457	774	1434	771	835	701	1055	1008	705	540	667	513	694	526	1230	474	48	0
MER41_Ttr-LTR	giraffe	1347	0	0	0	0	54	3	1599	36	1694	27	44	32	1798	652	1741	668	1963	605	726	553	1693	650	1547	648	694	532	1544	636	964	918	760	600	783	606	1586	536	110	1
MER41_Ttr-LTR	mule_deer	1190	0	0	0	0	593	1	1152	3	1316	1	607	73	1465	601	1448	618	1568	563	676	530	1356	600	1284	597	647	500	1294	574	2178	635	879	855	850	761	1355	590	56	0
MER41_Ttr-LTR	reeves_muntjac	1261	0	0	0	0	616	2	1265	8	1394	2	608	75	1552	604	1510	629	1643	573	706	534	1418	617	1364	613	678	518	1356	599	2310	641	1416	783	934	893	1397	604	71	0
MER41_Ttr-LTR	central_european_red_deer	1032	0	0	0	0	44	0	1115	6	90	1	33	18	590	436	1296	478	534	381	587	416	1230	461	572	404	562	406	562	396	616	458	686	563	725	595	742	660	0	0
MER41_Ttr-LTR	domestic_pig	86	0	0	0	0	1	0	26	0	23	0	0	0	0	0	4	0	0	0	0	0	5	0	3	0	0	0	0	0	0	0	0	0	0	0	3	0	32	30
MER41_BT	alpaca	79	25	22	23	21	0	0	0	0	0	0	0	0	0	0	0	0	0	0	0	0	0	0	0	0	0	0	0	0	0	0	0	0	0	0	0	0	0	0
MER41_BT	wild_bactrian_camel	54	58	15	18	17	11	1	23	0	20	0	0	0	2	0	2	0	1	0	3	0	1	0	2	0	2	0	1	0	3	0	3	0	3	0	3	0	4	0
MER41_BT	hippopotamus	5459	928	2	0	0	2994	2504	32451	358	27267	275	83	0	3923	23	3905	16	5144	29	200	5	3025	14	2975	17	201	4	2961	13	6589	27	237	3	277	4	3293	21	935	2
MER41_BT	blue_whale	1884	1796	1	2	1	1103	129	12045	1177	8750	666	312	1	513	3	621	8	646	5	516	6	632	8	466	3	492	4	385	4	964	9	536	4	745	4	676	4	16	0
MER41_BT	common_bottlenose_dolphin	1861	1231	1	0	0	885	102	31178	681	6660	1102	177	0	312	1	4534	14	429	2	339	1	3337	16	328	3	334	3	214	0	646	3	363	3	474	1	3632	9	7	0
MER41_BT	java_mouse_deer	11755	30	0	0	0	817	2	3001	4	2264	2	8669	4325	2445	56	2578	64	2592	41	42	18	2446	52	2127	55	36	14	1906	48	3884	85	51	18	47	22	2018	57	43	0
MER41_BT	forest_musk_deer	3366	75	0	0	0	60	7	5847	19	4394	12	47	21	2003	1787	6499	1089	11306	943	1511	903	4994	1045	4820	1050	1516	879	1423	858	1863	1033	1469	936	1600	946	3100	914	121	1
MER41_BT	cattle	3359	72	0	0	0	64	1	6320	12	161	4	62	14	1610	940	1975	1748	1691	1133	1659	1109	5894	1214	1619	1094	1646	1082	1583	1076	1949	1050	1513	958	1653	978	1385	798	0	0
MER41_BT	eastern_bongo	3390	75	0	0	0	48	1	5696	11	4476	11	58	14	1456	819	8912	1242	1790	1629	1514	957	6104	1061	6020	1070	1493	927	1471	948	1668	882	1365	844	1488	851	2995	796	115	0
MER41_BT	scimitar_horned_oryx	3401	75	0	0	0	1220	9	5687	12	4366	9	1044	48	6096	1089	6628	1277	10109	1108	1897	1727	5077	1589	4991	1547	1844	1449	4508	1365	8845	1263	3706	1102	5577	1168	3254	932	106	0
MER41_BT	blue_wildebeest	3488	66	0	0	0	62	5	5433	25	139	4	42	17	1539	919	1719	1133	1605	974	1824	1501	1921	1750	1760	1392	1781	1387	1708	1239	1835	1024	1469	928	1571	943	1364	780	0	0
MER41_BT	domestic_goat	3373	82	0	0	0	55	4	5419	14	4238	16	43	19	1482	897	12166	1274	1557	964	1747	1430	8561	1450	1824	1704	1822	1598	1627	1217	1727	981	1368	911	1551	938	2943	910	0	0
MER41_BT	sheep	3296	80	0	0	0	1070	6	5231	12	3977	12	926	45	3488	1010	4245	1194	6526	1052	3506	1439	3513	1406	3365	1600	1768	1651	3188	1287	5875	1145	3035	1046	4109	1083	2683	878	110	0
MER41_BT	gerenuk	3583	64	1	0	0	50	0	4998	10	3820	14	40	16	6170	1044	6736	1249	10147	1107	1746	1285	5596	1352	5601	1360	1694	1249	1991	1858	1703	983	1389	917	1493	928	2878	890	96	1
MER41_BT	giraffe	3519	148	1	0	0	121	5	8589	156	6540	114	106	36	4642	1186	4544	1233	5535	1061	1665	982	4197	1161	4063	1150	1671	946	4063	1141	2562	1897	1703	1115	1901	1138	3501	1090	194	0
MER41_BT	mule_deer	3267	85	1	0	0	1137	9	6057	20	4674	13	973	55	3613	1131	3752	1172	4178	998	1440	920	3351	1073	3261	1076	1425	909	3014	1051	5844	1367	1911	1756	1926	1478	2966	1229	122	1
MER41_BT	reeves_muntjac	3476	74	0	0	0	1171	21	5909	21	4656	14	1003	67	3554	1149	3830	1209	4228	1038	1466	944	3413	1145	3270	1140	1484	928	3142	1125	5755	1405	3402	1630	2121	1848	3042	1305	111	0
MER41_BT	central_european_red_deer	2663	77	0	0	0	66	1	5547	9	146	1	50	18	1314	766	3210	911	1236	663	1173	724	2902	856	1176	726	1176	713	1136	698	1658	929	1482	1110	1606	1157	1567	1335	0	0
MER41_BT	domestic_pig	808	78	1	0	0	3	0	705	2	545	0	0	0	0	0	63	0	0	0	0	0	61	1	52	1	0	0	0	0	0	0	0	0	0	0	66	0	386	381
