# Supplementary material for: Ruminant-specific retrotransposons shape regulatory evolution of bovine immunity
Source: HighWire-hosted journal article supplement (doi:10.1101/gr.276241.121), 2022-08-01
Supplement: Supplemental_Table_S14.xlsx [file Supplemental_Table_S14.xlsx]

## Sheet: Descriptions
Supplemental Table S14
Filtered Bov-A2, BovB, and MER41_BT insertions and deletions as called using MELT.
Both insertions and deletions are included
For more information see Methods
Sheets
Bov-A2 variants	Filtered MELT deletion and insertion calls for Bov-A2
BovB variants	Filtered MELT deletion and insertion calls for BovB
MER41_BT variants	Filtered MELT deletion and insertion calls for MER41_BT
Description of columns:
Chromosome	Chromosome
Position	Variant start position
Reference allele	Reference nucleotide at position
Variant type	Insertion ("<INS:ME:NAME>") or deletion ("<CN:0>")
Filter	Indicates whether variant call has passed MELT QC; applicable only to insertions
Info	Summary of variant including length of deletion, end coordinate, etc.
Angus4 ... Yanbian	Genotypes for each sample. "0/0" = homozygous for reference allele (no deletion), "0/1" = heterozygous, "1/1/" = homozygous for variant allele (deletion)

## Sheet: Bov-A2 variants
Chromosome	Position	Reference allele	Variant type	Filter	Info	Angus4	Ankole4	BL3	Bashan3	Beefmaster2	Braunvieh1	Charolais2	Chianina2	Corriente4	Devon	Gelbvieh4	Gir1	Hanwoo8	Hereford6	Holstein	Jersey	Jian4	Kazakh3	Limousin2	Luxi1	MaineAnjou4	Mishima	Mongolian4	Nelore4	Nganda	Nsongora	RedAngus2	Salers1	SantaGertrudis2	Shorthorn4	ShorthornZebu1	Simmental5	Tarentaise1	TexasLonghorn4	Tibetan9	Weining3	Wenshan7	Yanbian
chr1	4179629	A	<INS:ME:Bov-A2>	PASS	TSD=null;ASSESS=4;INTERNAL=XM_024993775.1,INTRONIC;SVTYPE=Bov-A2;SVLEN=269;MEINFO=Bov-A2,0,269,+;DIFF=1:a68g,c132t,t142c,g204a,g219a,a245g,c255t;LP=134;RP=141;RA=-0.073;PRIOR=false;SR=62	0/0:-0,-9.63,-190	0/1:-70,-13.25,-162	0/1:-88,-9.03,-72	0/0:-0,-4.82,-94.7	0/1:-30,-7.83,-109	0/1:-59.5,-13.85,-198	0/1:-60,-10.24,-128	0/1:-32,-6.02,-76	0/1:-113.2,-9.63,-52	0/0:-1.2,-11.44,-191.2	0/1:-76,-13.25,-169.4	0/0:-0,-12.04,-240	0/0:-0,-12.04,-238	0/0:-0,-12.64,-252	0/1:-30,-9.63,-148	0/1:-64.1,-10.24,-122	0/0:-0,-10.24,-204	0/1:-91.9,-9.63,-80	0/1:-96,-21.67,-310.6	0/1:-64,-7.83,-80	0/1:-130.2,-13.85,-104.43	0/1:-76,-7.22,-50	0/0:-0,-9.03,-180	0/0:-0,-11.44,-228	0/0:-0,-17.46,-346.1	0/1:-118.7,-20.47,-252	0/0:-0,-12.64,-252	0/1:-86,-10.84,-100	0/0:-0,-7.83,-154.6	0/1:-124,-10.24,-50	0/0:-0.6,-7.22,-132	0/0:-0,-12.64,-246.9	0/1:-82,-14.45,-186	0/1:-44,-7.83,-106	0/1:-66,-12.64,-172	0/1:-86,-9.63,-94	0/0:-0,-9.03,-180	0/1:-52,-8.43,-102
chr1	7266308	C	<INS:ME:Bov-A2>	PASS	TSD=GCTAATTGACTTTC;ASSESS=5;INTERNAL=XM_024991980.1,INTRONIC;SVTYPE=Bov-A2;SVLEN=268;MEINFO=Bov-A2,1,269,-;DIFF=0.97:c54t,a68g,c97t,c103t,g104t,c111a,a164c,g212a,c218a,g241a,c255t,n265-269;LP=10;RP=99;RA=-3.307;PRIOR=false;SR=50	0/0:-0,-12.64,-252	0/1:-70,-9.63,-105.9	0/0:-0,-7.22,-143.1	0/1:-30,-9.03,-144	0/0:-0,-9.03,-180	0/0:-0,-7.22,-144	0/0:-0,-7.83,-152	0/1:-86,-7.83,-60	0/0:-0,-13.85,-276	0/0:-0,-9.03,-178	0/0:-0,-13.25,-260.3	0/0:-0.6,-2.41,-36.6	0/0:-0,-7.83,-152.5	0/0:-0,-8.43,-166	0/0:-0,-9.63,-189.2	0/0:-0,-2.41,-48	0/1:-65.2,-8.43,-96	0/1:-96.06,-11.44,-113.9	0/1:-71.3,-9.63,-96.02	0/1:-77.3,-9.63,-96.01	0/0:-0,-9.03,-180	0/0:-0,-6.02,-120	1/1:-125.2,-8.43,-1.2	0/1:-28.8,-4.82,-58	0/1:-65.5,-6.02,-46	1/1:-115.2,-7.83,-1.2	0/0:-0,-6.62,-132	0/0:-0,-7.83,-154.6	0/1:-66,-10.84,-142	0/1:-54,-7.22,-82.9	0/1:-44,-7.22,-95	0/0:-0,-13.85,-276	0/0:-0,-7.22,-144	0/1:-41.4,-9.63,-142.1	0/0:-0,-14.45,-286	0/0:-0,-7.83,-156	1/1:-96.8,-6.02,-0.6	0/1:-30,-6.02,-82
chr1	10939782	G	<INS:ME:Bov-A2>	PASS	TSD=TGGAGAAGGGAATGGCAACCCACTCCAG;ASSESS=5;INTERNAL=null,null;SVTYPE=Bov-A2;SVLEN=267;MEINFO=Bov-A2,1,268,+;DIFF=0.29:t28c,t33c,g55a,g59a,g61c,a68g,g69c,a80g,t90c,c97t,c103t,c111t,n123-125,a148g,g200t,a203g,c218t,a233t,c234a,g247a,n253-269;LP=1;RP=10;RA=-3.322;PRIOR=false;SR=5	0/0:-0,-10.84,-204.6	0/0:-1.2,-11.44,-192.1	0/0:-0,-8.43,-165.6	0/0:-0,-4.21,-84	0/0:-0,-12.64,-251.8	0/0:-0,-10.24,-200.2	0/0:-0,-13.25,-259.6	0/0:-0,-13.85,-266.9	0/0:-0,-15.65,-306	0/0:-0,-7.83,-154	0/0:-0,-9.03,-177	0/1:-48.5,-6.02,-57.9	0/0:-0,-11.44,-226	0/0:-0,-9.63,-188.5	0/0:-0,-7.83,-156	0/0:-0,-5.42,-106	0/1:-86.3,-9.03,-80.4	0/0:-0,-9.03,-180	0/0:-0.6,-20.47,-383.6	0/0:-0,-10.24,-204	0/0:-0.6,-9.03,-168.6	0/0:-0,-4.82,-96	0/0:-0,-6.62,-131.5	0/0:-0.01,-4.21,-79.8	0/0:-0,-9.63,-192	0/0:-0,-10.24,-204	0/0:-0,-8.43,-164	0/0:-0,-9.63,-190.5	0/0:-0.79,-8.43,-136.8	0/0:-0,-16.86,-332.1	0/0:-0,-11.44,-228	0/0:-0.03,-17.46,-335.1	0/0:-0,-12.04,-235.9	0/0:-0,-8.43,-166.6	0/0:-0,-9.03,-180	0/0:-0,-5.42,-104.4	0/1:-45.6,-7.22,-86.1	0/0:-0,-4.21,-84
chr1	15546322	C	<INS:ME:Bov-A2>	PASS	TSD=dACAC;ASSESS=5;INTERNAL=XM_024993808.1,INTRONIC;SVTYPE=Bov-A2;SVLEN=267;MEINFO=Bov-A2,1,268,-;DIFF=0.87:c54t,g66a,g98a,c163t,t166c,g194a,g209a,g219a,c221g,g225a,n244-269;LP=9;RP=1;RA=3.17;PRIOR=false;SR=7	0/0:-0,-13.25,-264	0/0:-0,-9.63,-192	0/0:-0,-19.27,-380.4	0/0:-0,-7.83,-156	0/0:-0,-12.04,-240	0/0:-0,-13.85,-276	0/0:-0,-14.45,-288	0/0:-0,-9.03,-180	0/0:-0,-16.86,-336	0/0:-0,-9.63,-192	0/0:-0,-17.46,-348	0/1:-60,-12.04,-180	0/0:-0,-15.05,-300	0/0:-0,-12.64,-252	0/0:-0,-9.03,-180	0/0:-0,-9.03,-180	0/0:-0.6,-6.62,-120.6	0/0:-0,-4.21,-84	0/0:-0,-17.46,-348	0/0:-0,-7.22,-144	0/0:-0,-11.44,-228	0/0:-0,-1.81,-36	0/0:-0,-4.82,-96	0/0:-1.81,-13.85,-241.61	0/0:-0,-6.62,-132	0/0:-0,-9.63,-192	0/0:-0,-12.64,-252	0/0:-0,-15.05,-300	0/0:-1.2,-16.86,-313.2	0/0:-0,-11.44,-228	0/0:-0,-11.44,-228	0/0:-0,-19.27,-384	0/0:-0,-12.64,-252	0/0:-0,-13.25,-258	0/0:-0,-8.43,-168	0/0:-0,-6.62,-130	0/0:-1.2,-7.83,-133.2	0/0:-0,-9.63,-192
chr1	23356673	A	<INS:ME:Bov-A2>	PASS	TSD=AAAAATAA;ASSESS=5;INTERNAL=null,null;SVTYPE=Bov-A2;SVLEN=261;MEINFO=Bov-A2,7,268,-;DIFF=0.54:n1-6,a10g,n16,n28,n46,t50a,g55a,g61a,a68g,c79a,g88a,t90g,g98a,g108a,t120a,t121a,t128a,c165t,g193a,g200t,n210-269;LP=6;RP=1;RA=2.585;PRIOR=false;SR=9	0/0:-0,-13.85,-274	0/0:-0,-14.45,-274.3	0/0:-0,-10.84,-200.1	0/0:-0,-4.82,-94.7	0/0:-0,-10.24,-198.8	0/0:-0,-12.04,-236	0/0:-0.6,-15.05,-277.9	0/0:-0,-15.05,-285.2	0/0:-1.81,-18.66,-324.21	0/0:-0,-10.24,-203	0/0:-0,-13.25,-258.3	0/0:-0,-12.04,-237.5	0/0:-0,-13.25,-246.9	0/0:-0,-9.63,-187.1	0/0:-0,-8.43,-164.5	0/0:-0,-7.22,-140	0/0:-0,-6.62,-130.3	0/0:-0,-6.02,-118.4	0/0:-0.13,-18.66,-351.9	0/0:-0,-8.43,-168	0/0:-0,-15.05,-289	0/0:-0,-4.82,-96	0/0:-0,-4.21,-82.5	0/1:-94,-10.24,-98.4	0/0:-0.03,-9.63,-178.4	0/0:-0,-11.44,-218.1	0/0:-0,-9.63,-190.4	0/0:-0,-13.85,-274	0/0:-0,-17.46,-342.7	0/0:-0,-9.63,-185.2	0/0:-0,-5.42,-100.2	0/0:-0,-12.64,-241.1	0/0:-0,-10.24,-204	0/0:-0,-13.85,-272.2	0/0:-0,-6.02,-116.5	0/0:-0,-6.62,-128.5	0/0:-0,-5.42,-106.3	0/0:-0,-10.24,-200.5
chr1	23686601	T	<INS:ME:Bov-A2>	PASS	TSD=TGTATTGTACT;ASSESS=5;INTERNAL=null,null;SVTYPE=Bov-A2;SVLEN=267;MEINFO=Bov-A2,1,268,+;DIFF=1:c20t,t33c,g98a,c103t,g182a,g201a,c218t,a223g,a233c,c240t,g251a,c255t;LP=278;RP=277;RA=0.005;PRIOR=false;SR=238	1/1:-266.6,-16.26,-0.6	1/1:-299.1,-18.06,-0.6	1/1:-214.91,-14.45,-1.81	1/1:-300.6,-18.06,-0.6	1/1:-159,-9.03,-0	1/1:-263.9,-16.26,-1.2	1/1:-236.7,-13.85,-0	0/1:-134.2,-15.05,-144	1/1:-226.6,-13.85,-0.6	1/1:-246.1,-15.05,-0.6	1/1:-208.2,-13.25,-1.2	0/1:-59.5,-6.02,-36.44	0/1:-202.7,-18.06,-120	1/1:-166.6,-10.24,-0.6	1/1:-215.3,-13.25,-0	1/1:-145.2,-8.43,-0	1/1:-264.3,-15.05,-0	1/1:-204,-12.04,-0	1/1:-357.7,-22.28,-1.21	1/1:-194,-11.44,-0	1/1:-275.2,-16.26,-0	1/1:-75.5,-4.82,-0.13	1/1:-238,-13.85,-0	0/1:-44,-4.82,-48	0/1:-140.9,-13.85,-108	0/1:-181.2,-15.65,-96	1/1:-200.3,-12.04,-0.13	1/1:-320,-18.66,-0	1/1:-222.7,-13.25,-0.02	1/1:-217.1,-13.25,-0.6	0/0:-0,-11.44,-226	1/1:-277.2,-17.46,-1.21	1/1:-184,-10.84,-0	0/1:-104,-9.03,-60	0/1:-114,-10.84,-84	0/1:-116,-9.63,-60	1/1:-145.2,-9.63,-1.2	0/1:-136,-12.64,-96
chr1	23839293	T	<INS:ME:Bov-A2>	PASS	TSD=TTTTTTTTT;ASSESS=5;INTERNAL=null,null;SVTYPE=Bov-A2;SVLEN=267;MEINFO=Bov-A2,1,268,-;DIFF=0.7:g27a,c32t,n36-41,c54t,g88a,n95,n99,g104a,c189t,g198a,g200a,t239g,g241a,c244t,n255,n267-269;LP=4;RP=3;RA=0.415;PRIOR=false;SR=4	0/1:-56,-10.84,-152.3	0/0:-0,-12.04,-240	0/0:-0.6,-10.84,-202.6	0/0:-0,-15.65,-312	0/0:-1.2,-11.44,-200.5	0/0:-0,-9.63,-192	0/0:-0,-10.24,-204	0/0:-0.6,-9.63,-178.6	0/1:-48,-8.43,-118	0/0:-0,-6.62,-123.7	0/1:-78.03,-9.63,-101.2	0/0:-0,-1.81,-36	0/0:-0.6,-13.85,-262.6	0/0:-0,-9.63,-192	0/0:-0,-6.62,-129.4	0/0:-0.6,-6.62,-118.7	0/0:-0,-8.43,-168	0/0:-0,-12.64,-252	0/1:-31.6,-8.43,-125	0/0:-0,-12.64,-252	0/1:-80,-12.04,-156	0/0:-0.6,-6.62,-118.6	0/0:-0.6,-10.84,-204.6	0/0:-0,-6.62,-128.9	0/0:-0,-4.21,-82	0/0:-0,-8.43,-166	0/1:-118,-14.45,-168	0/0:-1.2,-7.22,-119.8	0/0:-1.2,-12.64,-228.2	0/1:-22,-5.42,-84	0/0:-0,-12.04,-240	0/0:-0,-15.05,-294.1	0/1:-83,-9.03,-94	0/0:-1.2,-10.84,-192.4	0/0:-0,-10.24,-204	0/0:-0,-9.63,-192	0/0:-0,-7.22,-144	0/0:-0.6,-9.63,-180.6
chr1	25765928	T	<INS:ME:Bov-A2>	PASS	TSD=null;ASSESS=3;INTERNAL=null,null;SVTYPE=Bov-A2;SVLEN=267;MEINFO=Bov-A2,1,268,-;DIFF=0.33:c9a,a16t,c17a,t28c,a29t,c30t,c32t,g35a,c36g,c37t,c46t,a53c,c54t,g55t,c62a,n77,n86,c111g,n113-117,n123,t166a,c167a,g172a,g185a,g193t,n198-207,c218t;LP=5;RP=2;RA=1.322;PRIOR=false;SR=6	0/0:-1.2,-10.84,-193.2	0/1:-24,-6.02,-96	0/0:-0.6,-12.04,-228.6	0/0:-0,-9.63,-192	0/0:-0,-15.05,-300	0/0:-0.6,-15.65,-300.6	0/0:-0.6,-10.24,-192.6	0/0:-0,-7.83,-156	0/0:-0.6,-12.04,-228.1	0/0:-0,-10.24,-202	0/0:-0,-14.45,-288	0/1:-48,-10.84,-168	0/0:-1.2,-17.46,-325.2	0/0:-0.6,-13.85,-262.6	0/0:-0,-10.24,-204	0/0:-0.6,-8.43,-156.6	0/0:-0,-7.22,-144	0/1:-24,-6.02,-96	0/0:-0,-15.65,-312	0/0:-0,-13.25,-264	0/0:-0.6,-7.83,-144.6	0/1:-24,-2.41,-24	0/0:-0,-6.02,-120	0/0:-0.6,-8.43,-156.6	0/0:-0,-10.24,-204	0/0:-0.6,-12.64,-240.6	0/0:-0,-9.63,-192	0/0:-0.6,-13.25,-252.6	0/0:-0,-7.83,-156	0/0:-0,-11.44,-226	0/0:-0,-12.64,-252	0/0:-0.6,-15.65,-299.3	0/0:-0,-7.22,-143.3	0/0:-0.6,-10.24,-192.6	0/0:-0,-7.83,-156	0/0:-0,-13.25,-262	0/0:-0,-6.02,-120	0/0:-0.6,-9.63,-180.6
chr1	25986149	T	<INS:ME:Bov-A2>	PASS	TSD=TGAGATTTTTCTTT;ASSESS=5;INTERNAL=null,null;SVTYPE=Bov-A2;SVLEN=267;MEINFO=Bov-A2,1,268,-;DIFF=0.87:c9a,c15t,c17a,c54t,g59a,n61,n65,n69,c87t,g88a,g98a,c103t,c218t,c232a;LP=10;RP=4;RA=1.322;PRIOR=false;SR=5	0/0:-0,-19.27,-384	0/0:-0,-8.43,-168	0/0:-0,-17.46,-348	0/0:-0,-1.81,-36	0/0:-0,-13.85,-276	0/0:-0,-14.45,-288	0/0:-0,-16.86,-336	0/0:-0,-14.45,-288	0/0:-0,-18.06,-360	0/0:-0,-6.02,-120	0/0:-0,-24.68,-492	0/0:-0,-17.46,-348	0/0:-0,-12.64,-252	0/0:-0,-15.65,-312	0/0:-0.6,-9.03,-165.2	0/0:-0,-4.21,-84	0/0:-0,-6.62,-132	0/0:-0,-1.81,-36	0/0:-0,-13.25,-264	0/0:-0,-7.83,-156	0/0:-0,-18.66,-372	0/0:-0,-3.01,-60	0/1:-60,-4.21,-24	0/0:-0,-11.44,-228	0/1:-46,-6.02,-72	0/0:-0,-12.64,-252	0/0:-0.6,-15.65,-300.6	0/0:-0,-11.44,-228	0/0:-0,-16.86,-336	0/0:-0,-14.45,-288	0/0:-0,-11.44,-228	0/0:-0,-13.85,-272	0/0:-0,-13.85,-270	0/0:-0,-18.06,-360	0/0:-0.6,-2.41,-36.6	0/0:-0,-7.22,-144	0/0:-0,-6.02,-120	0/0:-0,-10.24,-204
chr1	27183405	T	<INS:ME:Bov-A2>	PASS	TSD=null;ASSESS=4;INTERNAL=XM_005201167.4,INTRONIC;SVTYPE=Bov-A2;SVLEN=258;MEINFO=Bov-A2,11,269,+;DIFF=1:c9a,c30t,a44g,c46t,c54t,g88a,g98a,a100g,c103t,c111t,g145a,c165t,g172a,g198a,g200a,a203c,g208a,c255t;LP=29;RP=54;RA=-0.897;PRIOR=false;SR=12	0/0:-0,-7.22,-144	0/1:-76.8,-13.25,-152.08	0/0:-0,-4.82,-96	0/0:-0,-6.02,-120	0/0:-0,-11.44,-226	0/0:-0.01,-9.63,-185.7	0/1:-180.2,-14.45,-72	0/0:-0,-10.24,-204	0/0:-0,-14.45,-285.6	0/0:-0,-6.02,-120	0/0:-0,-9.63,-192	0/1:-30.4,-3.01,-22	0/0:-0,-8.43,-168	0/0:-0,-13.25,-261.8	0/0:-0.6,-8.43,-156.6	0/0:-0,-1.81,-36	0/0:-0,-8.43,-168	0/0:-0,-9.63,-192	0/0:-0,-9.03,-179.9	0/0:-0,-9.03,-180	0/0:-0,-7.83,-154.1	0/0:-0,-3.61,-72	0/0:-0,-3.01,-60	0/0:-0,-4.21,-82	0/0:-0,-9.63,-192	0/0:-0,-10.84,-216	0/0:-0,-8.43,-168	0/0:-0,-10.24,-204	0/1:-190,-13.25,-34	0/0:-0,-9.03,-178.8	0/1:-89.1,-15.05,-172.37	0/0:-0,-12.04,-239.5	0/0:-0,-7.22,-144	0/0:-0,-7.22,-141.9	0/0:-0,-9.63,-192	0/0:-0,-12.64,-252	0/0:-0,-8.43,-167.2	0/0:-0,-6.62,-132
chr1	32715090	T	<INS:ME:Bov-A2>	PASS	TSD=TTTTTTTTTTTTT;ASSESS=5;INTERNAL=null,null;SVTYPE=Bov-A2;SVLEN=267;MEINFO=Bov-A2,1,268,-;DIFF=0:c22t,a49g,a53g,g73a,t81c,c87t,g88t,a91c,g98a,g99a,a109c,n112-142,c158t,g198a,g200a,g202a,n210,g219a,t222a,g231a,c240t,c249a,g256a;LP=2;RP=1;RA=1;PRIOR=false;SR=9	0/0:-0,-10.24,-204	0/0:-0,-10.84,-208	0/1:-48,-9.63,-144	0/0:-0,-3.01,-59.9	0/1:-48,-10.84,-168	0/1:-89.8,-15.05,-203.31	0/1:-118,-13.85,-156	0/0:-1.2,-16.26,-301.2	0/1:-72,-12.04,-168	0/0:-0,-9.03,-180	0/1:-108,-15.65,-202	0/0:-0,-13.85,-276	0/0:-0,-6.62,-132	0/0:-0.73,-13.25,-247.2	0/0:-0,-9.63,-192	0/0:-0,-4.82,-96	0/0:-0.6,-6.62,-120.6	0/0:-0,-7.83,-156	0/0:-1.2,-9.03,-153.2	0/0:-0.6,-4.82,-84.6	0/1:-60,-12.04,-180	0/0:-0,-2.41,-48	0/0:-0,-2.41,-48	0/0:-0,-7.83,-150	0/0:-0,-2.41,-48	0/0:-0,-12.04,-240	0/0:-0.6,-9.03,-168	0/0:-0.6,-14.45,-275.4	0/1:-63.9,-13.25,-192.06	0/1:-58,-9.03,-120	0/0:-0,-9.63,-192	0/1:-78.7,-13.25,-180	0/1:-84,-15.65,-228	0/1:-80,-10.84,-132	0/0:-1.2,-9.03,-157.2	0/0:-0.6,-7.83,-144.6	0/1:-24,-5.42,-84	0/0:-0,-7.22,-144
chr1	34587880	G	<INS:ME:Bov-A2>	PASS	TSD=CAG;ASSESS=5;INTERNAL=null,null;SVTYPE=Bov-A2;SVLEN=266;MEINFO=Bov-A2,2,268,-;DIFF=0.79:n1,g88c,g98t,c103t,c111t,a113g,t129c,t134c,c140t,t142c,n159-160,n172-199,c218a,g231a,c240t,c246a,c255a,c258a,t260a;LP=16;RP=10;RA=0.678;PRIOR=false;SR=10	0/0:-0,-17.46,-330.9	0/1:-53.6,-10.24,-143	0/0:-0,-10.24,-192.9	0/1:-42,-6.62,-84	1/1:-32,-1.81,-0	1/1:-60.9,-3.61,-0.06	0/1:-44,-7.22,-90	0/0:-0,-10.84,-198.2	0/0:-0.01,-18.06,-348.8	0/0:-0,-9.63,-191	0/0:-1.2,-12.04,-210.6	0/1:-51.9,-4.21,-22.01	0/0:-1.2,-10.24,-173.9	0/0:-0.7,-8.43,-141.3	0/0:-0,-5.42,-108	0/0:-0,-3.61,-72	1/1:-44,-2.41,-0	0/0:-0,-10.84,-216	0/0:-0,-13.25,-248.3	0/1:-34,-6.62,-96	1/1:-46.6,-3.01,-0.6	0/0:-0.6,-5.42,-92.6	0/1:-46,-7.22,-96	0/0:-0,-7.22,-133.7	0/1:-38.1,-7.83,-106	1/1:-129.1,-7.83,-0.6	0/0:-0,-11.44,-224.7	0/0:-0,-7.83,-154	0/1:-44.03,-9.63,-136.5	1/1:-46,-2.41,-0	0/0:-0.6,-6.02,-105.8	1/1:-37.2,-2.41,-0.03	0/0:-0,-6.62,-119.1	0/0:-0,-15.65,-300.2	0/0:-0,-9.63,-192	0/0:-0.6,-3.01,-45.3	1/1:-24,-1.2,-0	1/1:-52.6,-3.61,-0.6
chr1	36737039	T	<INS:ME:Bov-A2>	PASS	TSD=GCTTGAAACACT;ASSESS=5;INTERNAL=null,null;SVTYPE=Bov-A2;SVLEN=267;MEINFO=Bov-A2,1,268,+;DIFF=1:a10g,c20a,t28c,c32t,a68g,c74t,n91,c197t,c230t,g241a,g242a;LP=38;RP=37;RA=0.038;PRIOR=false;SR=17	0/0:-0,-16.86,-336	0/0:-0,-11.44,-228	0/0:-0,-10.84,-216	0/0:-0,-7.22,-144	0/0:-0,-12.64,-252	0/0:-0,-16.26,-324	0/0:-0,-13.25,-264	0/0:-0,-10.24,-204	0/0:-0,-13.25,-264	0/0:-0,-9.03,-176.1	0/0:-0,-12.64,-249.2	0/0:-0,-11.44,-228	0/0:-0,-15.05,-300	0/0:-0,-9.63,-192	0/0:-0,-10.24,-204	0/0:-0,-6.62,-132	0/1:-112,-12.04,-108	0/0:-0,-6.62,-132	0/0:-0,-17.46,-348	0/1:-102,-9.63,-72	0/0:-0,-16.86,-336	0/0:-0,-3.01,-60	0/0:-0,-6.02,-120	0/0:-0,-17.46,-348	0/0:-0,-6.62,-132	0/0:-0,-9.63,-192	0/0:-0,-12.64,-252	0/0:-0,-10.84,-214	0/1:-138,-13.85,-120	0/0:-0,-9.63,-192	0/1:-104,-14.45,-168	0/0:-0,-19.87,-396	0/0:-0,-11.44,-228	0/1:-152,-16.26,-144	0/0:-0,-6.02,-120	0/0:-0,-6.02,-120	0/1:-182,-15.65,-96	0/0:-0,-4.82,-96
chr1	38720465	T	<INS:ME:Bov-A2>	PASS	TSD=GTATCTACAAT;ASSESS=5;INTERNAL=null,null;SVTYPE=Bov-A2;SVLEN=267;MEINFO=Bov-A2,1,268,+;DIFF=0.8:g39a,a43g,c54t,a68g,a75c,c79t,a80t,g88a,t90a,a91c,n110-140,a152c,n159,a160c,g172a,t173c,g182a,g185a,a186g,g193t,c197t,g200a,a223t,g231a,c255t,t259g,t260c;LP=16;RP=21;RA=-0.392;PRIOR=false;SR=23	0/0:-0,-11.44,-226.3	0/0:-0,-10.24,-204	0/0:-0,-10.84,-216	0/0:-0,-8.43,-168	0/0:-0,-9.03,-180	0/0:-0,-15.65,-309.6	0/1:-107,-14.45,-168	0/0:-0.6,-7.83,-142.6	0/0:-0,-15.65,-312	0/0:-0,-10.24,-198.6	0/1:-101,-13.25,-144.08	0/0:-0,-8.43,-166	0/0:-0,-9.63,-192	0/0:-0,-16.86,-336	0/0:-0,-14.45,-283.9	0/0:-0,-7.83,-154	0/1:-52,-9.03,-120	0/1:-56,-6.62,-72	0/0:-0.6,-11.44,-210.6	0/0:-0,-3.01,-60	0/0:-0,-15.65,-312	0/0:-0,-7.22,-144	0/0:-0,-6.62,-132	0/0:-0,-10.24,-200	0/1:-44,-9.03,-132	0/0:-0,-13.25,-264	0/0:-0,-16.26,-323.8	0/0:-0,-12.04,-240	0/1:-64.6,-8.43,-92.3	0/0:-0,-10.84,-216	0/0:-0,-10.24,-202	0/0:-0,-16.86,-336	0/0:-0,-9.03,-180	0/0:-0,-13.85,-276	0/0:-0,-6.02,-120	0/1:-22,-5.42,-83.8	0/1:-69.7,-8.43,-84	0/0:-0,-10.24,-204
chr1	42381681	G	<INS:ME:Bov-A2>	PASS	TSD=ATTATTAG;ASSESS=5;INTERNAL=null,null;SVTYPE=Bov-A2;SVLEN=267;MEINFO=Bov-A2,1,268,+;DIFF=0.92:a11g,g40a,t67a,c74t,g84a,a91g,a94g,c111t,g238a,n249-269;LP=45;RP=43;RA=0.066;PRIOR=false;SR=33	0/0:-0,-12.04,-240	0/0:-0,-9.03,-180	0/0:-0,-16.26,-324	0/0:-0,-8.43,-168	0/1:-131.9,-14.45,-130	0/0:-0,-13.25,-262.5	0/1:-210.4,-17.46,-106	0/0:-0,-13.25,-264	0/0:-0,-9.63,-192	0/0:-0,-9.03,-178.4	0/0:-0,-11.44,-228	0/1:-46.4,-11.44,-166.04	0/0:-0,-12.64,-247.8	0/0:-0,-15.65,-312	0/0:-0,-7.83,-156	0/0:-0,-9.63,-192	0/1:-124,-9.03,-36	0/0:-0,-6.62,-132	0/0:-0,-16.26,-324	0/1:-84,-10.24,-108	0/0:-0,-12.04,-240	0/0:-0,-4.21,-84	0/0:-0,-2.41,-48	0/0:-0,-9.63,-192	0/1:-115.9,-10.84,-72	0/0:-0,-11.44,-228	0/0:-0,-12.64,-252	0/0:-0,-12.04,-240	0/1:-161.8,-15.05,-108	0/0:-0,-11.44,-228	0/0:-0,-10.84,-216	0/0:-0,-19.27,-384	0/0:-0,-9.03,-180	0/1:-144.5,-14.45,-120	0/0:-0,-9.63,-192	0/0:-0,-6.02,-120	0/0:-0,-9.63,-192	0/0:-0,-9.63,-190
chr1	42569989	A	<INS:ME:Bov-A2>	PASS	TSD=AGGGCA;ASSESS=5;INTERNAL=XM_002684692.3,PROMOTER;SVTYPE=Bov-A2;SVLEN=261;MEINFO=Bov-A2,7,268,-;DIFF=0.97:n1-6,c54t,a68g,g83a,a91g,g98a,d103-104,c111t,c114t,c117t,c123g,c163g,t166c,t176c,g202a,c217t,c218t,g247t,c255t;LP=58;RP=49;RA=0.243;PRIOR=false;SR=54	0/0:-0,-15.05,-300	0/0:-0,-7.22,-144	0/0:-0,-13.25,-263.9	0/0:-0,-9.63,-192	0/1:-146,-12.04,-84	0/0:-0,-17.46,-347.9	0/0:-0,-13.25,-264	0/0:-0,-15.65,-312	0/0:-0,-17.46,-348	0/0:-0,-10.24,-204	0/0:-0,-14.45,-288	0/0:-0,-7.83,-156	0/0:-0,-15.65,-312	0/0:-0,-13.25,-264	0/0:-0,-8.43,-168	0/0:-0,-10.84,-216	0/1:-116,-10.24,-72	0/0:-0,-13.25,-264	0/0:-0,-14.45,-288	0/1:-118,-10.84,-84	0/0:-0,-10.24,-204	0/0:-0,-6.62,-128	0/0:-0,-9.03,-180	1/1:-92,-5.42,-0	0/1:-136,-12.04,-82	0/1:-164,-17.46,-156	0/0:-0,-6.02,-120	0/0:-0,-12.64,-252	0/1:-107.1,-11.44,-108	0/0:-0,-4.21,-84	0/1:-122,-13.85,-126	0/0:-0,-16.86,-336	0/0:-0,-15.05,-300	0/1:-92,-9.63,-84	0/0:-0,-14.45,-288	0/1:-80,-11.44,-130	0/1:-160,-15.65,-130	0/0:-0,-9.03,-180
chr1	43212958	A	<INS:ME:Bov-A2>	PASS	TSD=AAGAGAGGAA;ASSESS=5;INTERNAL=XR_003035357.1,TERMINATOR;SVTYPE=Bov-A2;SVLEN=267;MEINFO=Bov-A2,1,268,-;DIFF=0.53:t12c,c17a,c30t,g40c,a42g,c54t,g55a,g59t,g66t,a68g,g98a,c130t,n140-143,g185t,n187,c189t,n195,g198t,n229,n235,n237,n239,c246t;LP=1;RP=6;RA=-2.585;PRIOR=false;SR=11	0/0:-0,-13.85,-272.6	0/1:-60,-11.44,-166	0/0:-0,-16.26,-322.2	0/0:-0,-8.43,-168	0/0:-0,-9.63,-191.9	0/0:-0,-13.25,-262.5	0/0:-0.6,-11.44,-212.7	0/0:-0,-17.46,-346.8	0/0:-0,-12.64,-244.9	0/0:-0.1,-10.84,-208.7	0/0:-0,-11.44,-226.2	0/1:-96,-10.24,-108	0/0:-0,-9.63,-185.1	0/0:-0,-14.45,-286	0/0:-0,-10.24,-204	0/0:-0,-7.22,-144	0/0:-0.6,-9.63,-180.6	0/0:-0,-10.84,-215.9	0/0:-0,-19.87,-387	0/0:-0.6,-9.03,-168.6	0/0:-0,-15.05,-298.3	0/0:-0,-1.81,-36	0/0:-0,-8.43,-166.6	0/1:-84,-14.45,-203.5	0/0:-0.6,-4.21,-72.6	0/1:-68,-9.03,-108	0/0:-0,-13.25,-258.5	0/0:-0,-13.25,-264	0/1:-84,-13.25,-178.7	0/0:-0,-14.45,-288	0/0:-0.6,-6.02,-108.6	0/0:-0,-13.85,-274.6	0/0:-0,-13.85,-276	0/1:-70.7,-12.04,-168	0/0:-0,-9.63,-192	0/0:-0,-8.43,-168	0/1:-72,-10.84,-143.9	0/0:-0,-10.84,-214.6
chr1	43338919	G	<INS:ME:Bov-A2>	PASS	TSD=AG;ASSESS=5;INTERNAL=null,null;SVTYPE=Bov-A2;SVLEN=267;MEINFO=Bov-A2,1,268,-;DIFF=0.72:c9a,c17a,t31a,g55a,g73a,g76t,g88a,t90a,g98a,n102-142,g172a,t173c,t174a,g185a,g193t,g198a,g200a,g211a,g216a,c218a,g219t,t222c,g231a,c234a,g241a,n246-269;LP=6;RP=5;RA=0.263;PRIOR=false;SR=10	0/0:-0,-15.65,-312	0/1:-33.8,-6.02,-74	0/0:-0,-18.66,-368.5	0/0:-0,-13.85,-276	0/0:-1.2,-10.84,-193.2	0/0:-0,-7.83,-156	0/0:-1.2,-9.03,-156.6	0/0:-1.81,-13.85,-241.81	0/0:-1.81,-18.66,-335.81	0/0:-0.03,-7.22,-135.7	0/0:-0,-12.04,-239.4	0/0:-0.6,-3.61,-56.6	0/0:-0,-10.84,-216	0/0:-0,-9.63,-192	0/0:-0,-10.24,-186.6	0/0:-0,-3.61,-72	0/1:-36,-7.22,-108	0/0:-0.6,-11.44,-213.6	0/0:-0,-10.24,-203.5	0/0:-0,-4.82,-96	0/0:-0,-15.65,-310.5	0/0:-0,-2.41,-44	0/0:-0.6,-11.44,-216.5	0/1:-41.3,-8.43,-110.4	0/1:-29.66,-11.44,-165.2	0/0:-0.61,-8.43,-138.7	0/0:-0,-10.24,-204	0/0:-0.6,-12.04,-227.9	0/0:-1.2,-12.04,-213.8	0/0:-0.6,-10.24,-192.6	0/0:-2.03,-14.45,-230.01	0/0:-0,-13.25,-264	0/1:-36.01,-10.84,-172.6	0/0:-0,-13.25,-262.9	0/0:-0.6,-10.84,-204.6	0/0:-0,-8.43,-168	0/0:-1.2,-10.24,-181.2	0/0:-0,-11.44,-228
chr1	48465901	T	<INS:ME:Bov-A2>	PASS	TSD=dCATTCAGTCATGTCCAAT;ASSESS=5;INTERNAL=null,null;SVTYPE=Bov-A2;SVLEN=267;MEINFO=Bov-A2,1,268,-;DIFF=0.84:c9a,c17a,c25a,c30t,c54t,g65a,g73a,g88a,t90a,g112a,n129-130,c168a,g172a,g185a,g193t,c197t,g198t,g200a,g208a,g211a,g216a,c218a,g231a,c234a,g247a,g256a;LP=6;RP=5;RA=0.263;PRIOR=false;SR=6	0/0:-0.6,-9.63,-180.6	0/0:-0.73,-10.24,-176.2	0/0:-0,-10.84,-214	0/0:-0.6,-7.22,-128.6	0/0:-0,-12.04,-237.8	0/0:-0,-9.63,-188.2	0/0:-0.6,-6.62,-114.6	0/0:-0,-9.03,-180	0/0:-0,-10.84,-216	0/0:-0,-10.84,-216	0/0:-0,-16.26,-324	0/0:-0,-6.62,-114	0/0:-0,-10.84,-210.8	0/0:-0,-13.85,-275.8	0/0:-0,-12.04,-240	0/0:-0,-1.81,-36	0/1:-54,-10.24,-142.1	0/0:-0,-8.43,-168	0/0:-0,-13.85,-274.6	0/0:-0,-9.03,-180	0/0:-0,-12.64,-251.2	0/0:-0,-4.82,-94	0/0:-0,-9.03,-180	0/0:-0,-10.24,-173.7	0/0:-0,-8.43,-168	0/0:-0,-9.63,-192	0/0:-0,-12.64,-252	0/0:-0,-9.03,-180	0/0:-1.2,-8.43,-134.2	0/0:-0,-15.05,-298.8	0/1:-34,-9.03,-125.9	0/0:-0,-12.04,-239.2	0/0:-0,-10.24,-202	0/0:-0.6,-13.85,-254.2	0/0:-0,-13.85,-276	0/0:-0.6,-4.21,-68.6	0/0:-1.2,-10.24,-178.1	0/0:-0,-10.84,-216
chr1	53772262	C	<INS:ME:Bov-A2>	PASS	TSD=null;ASSESS=4;INTERNAL=XM_024993537.1,INTRONIC;SVTYPE=Bov-A2;SVLEN=269;MEINFO=Bov-A2,0,269,+;DIFF=0.99:a43g,a44g,c47g,a68g,t81g,d92-96,c97g,c101g,c111t,a148g,a223c,d230,n231,a233t,n269-269;LP=12;RP=15;RA=-0.322;PRIOR=false;SR=5	0/0:-0,-13.25,-264	0/0:-0,-3.61,-72	0/0:-0,-18.06,-360	0/0:-0,-6.02,-120	0/0:-0,-13.85,-276	0/0:-0,-12.04,-240	0/0:-0,-12.04,-240	0/0:-0,-10.84,-216	0/0:-0,-12.64,-251.7	0/0:-0,-7.83,-156	0/0:-0,-24.68,-492	0/0:-0,-8.43,-168	0/0:-0,-12.64,-252	0/0:-0,-10.84,-216	0/0:-0,-6.02,-120	0/0:-0,-4.82,-96	0/1:-140,-11.44,-72	0/0:-0,-5.42,-108	0/0:-0,-7.83,-156	0/0:-0,-9.63,-192	0/0:-0.13,-10.24,-198.6	0/0:-0,-1.81,-36	0/0:-0,-4.82,-96	0/0:-0,-9.03,-180	0/0:-0,-12.04,-240	0/0:-0,-7.83,-156	0/0:-0,-10.24,-202	0/0:-0,-11.44,-228	0/0:-0,-16.26,-324	0/0:-0,-8.43,-168	0/0:-0,-4.82,-96	0/0:-0,-9.63,-192	0/0:-0,-16.86,-334.2	0/0:-0,-15.05,-300	0/0:-0,-5.42,-108	0/0:-0.6,-9.03,-168.6	0/1:-146,-12.04,-72	0/0:-0,-10.84,-216
chr1	56970751	T	<INS:ME:Bov-A2>	PASS	TSD=null;ASSESS=3;INTERNAL=XM_024994298.1,INTRONIC;SVTYPE=Bov-A2;SVLEN=268;MEINFO=Bov-A2,1,269,-;DIFF=1:n1,a44t,c71t,g73c,c78a,g88a,g172a,g198a,g200a,c218t,g219t,c230t,c240t;LP=16;RP=13;RA=0.3;PRIOR=false;SR=6	0/0:-0.01,-18.06,-353.6	0/0:-0,-4.82,-85.1	0/0:-0,-16.86,-336	0/0:-0,-6.02,-120	0/0:-0,-18.66,-372	0/0:-0,-12.64,-250.5	0/0:-0,-14.45,-286	0/0:-0,-12.04,-240	0/0:-0,-13.85,-275.4	0/0:-0,-9.03,-180	0/0:-0,-10.24,-204	0/0:-0,-12.04,-240	0/0:-0,-18.66,-372	0/0:-0,-11.44,-228	0/0:-0,-7.22,-139.2	0/0:-0,-6.02,-120	0/0:-0,-10.24,-204	0/0:-0,-9.03,-180	0/1:-95.4,-15.05,-178.5	0/1:-57.2,-7.83,-84.01	0/0:-0,-10.84,-216	0/0:-0,-1.81,-36	0/0:-0,-6.62,-132	0/0:-0.01,-11.44,-221.7	0/0:-0,-9.63,-192	0/0:-0,-4.82,-96	0/0:-0,-9.63,-192	0/1:-57.4,-7.83,-72.3	0/0:-0,-10.84,-216	0/0:-0,-14.45,-288	0/0:-0,-12.64,-249.5	0/0:-0,-18.06,-360	0/0:-0,-9.63,-192	0/0:-0,-13.25,-264	0/0:-0,-13.85,-276	0/0:-0,-7.83,-156	0/0:-0,-7.83,-156	0/0:-0,-10.24,-204
chr1	71600850	T	<INS:ME:Bov-A2>	PASS	TSD=GTGAACTTTTTTT;ASSESS=5;INTERNAL=XM_024994948.1,INTRONIC;SVTYPE=Bov-A2;SVLEN=269;MEINFO=Bov-A2,0,269,-;DIFF=0.45:c17a,g39t,a53g,c54t,c63t,i68ac,g73a,a75t,g76a,t90a,c97t,a100g,c103t,n129-269;LP=4;RP=6;RA=-0.585;PRIOR=false;SR=14	0/0:-0,-14.45,-288	0/0:-0,-9.63,-192	0/0:-0.6,-9.63,-180.6	0/1:-58,-6.62,-72	0/0:-0,-10.24,-203.2	0/0:-0,-10.24,-203.8	0/0:-0,-7.22,-144	0/0:-0,-9.63,-192	0/0:-0,-13.25,-262.2	0/0:-0,-7.83,-156	0/0:-0,-11.44,-228	0/0:-0,-8.43,-168	0/0:-0,-13.25,-264	0/0:-0,-11.44,-223	0/0:-0,-9.63,-192	0/0:-0,-4.82,-94	1/1:-48.6,-3.01,-0.6	0/0:-0,-11.44,-228	0/0:-0,-7.22,-144	0/0:-0,-8.43,-168	0/0:-0,-10.84,-216	0/0:-0,-3.61,-72	0/0:-0,-10.24,-204	0/0:-0,-5.42,-108	0/1:-49.4,-5.42,-48	0/0:-0,-6.02,-120	0/0:-0,-8.43,-168	0/0:-0,-11.44,-228	0/0:-0,-12.64,-252	0/0:-0,-12.04,-240	0/0:-0,-12.64,-252	0/0:-0,-9.03,-180	0/0:-0,-8.43,-166	0/0:-0,-5.42,-108	0/0:-0,-6.62,-132	0/0:-0,-6.62,-132	0/1:-58,-6.62,-72	0/0:-0,-4.82,-96
chr1	72422291	C	<INS:ME:Bov-A2>	PASS	TSD=dAT;ASSESS=5;INTERNAL=NM_001075999.1,INTRONIC;SVTYPE=Bov-A2;SVLEN=267;MEINFO=Bov-A2,1,268,+;DIFF=1:c20g,a68g,c87a,t90a,g98a,a102g,c130a,a146g,a196c,c240t,t260a,g265a;LP=8;RP=29;RA=-1.858;PRIOR=false;SR=17	0/1:-54.7,-6.62,-62.8	0/0:-0,-5.42,-102	0/1:-48,-9.63,-128.5	0/1:-120.1,-12.64,-107	0/0:-0,-9.63,-178.1	0/0:-0.34,-8.43,-137.4	0/0:-1.81,-15.05,-251.01	0/0:-0,-6.02,-102.8	0/0:-0.63,-13.85,-245.1	0/0:-0,-4.21,-80.7	0/0:-0,-11.44,-221.6	1/1:-15.1,-1.81,-0.82	0/1:-95.94,-11.44,-90.23	0/0:-0.6,-12.64,-230.2	0/1:-36.34,-10.24,-130.66	1/1:-62.5,-3.61,-0.1	0/1:-65.21,-7.83,-73.46	0/1:-81,-13.85,-169.06	0/1:-64.5,-14.45,-196.2	0/1:-35.76,-6.02,-55.89	0/0:-1.21,-7.83,-115.9	0/1:-69.23,-7.22,-46.41	0/0:-1.98,-18.66,-303.31	0/0:-0,-3.61,-68	0/1:-39.4,-7.22,-84.43	0/0:-0.6,-7.22,-128.6	0/0:-0,-10.24,-183.8	0/0:-0,-9.63,-168.4	0/0:-1.2,-12.64,-220.3	0/0:-1.21,-7.22,-105.9	0/1:-40.9,-5.42,-37.49	0/0:-2.58,-11.44,-169.6	0/0:-0,-7.22,-131.4	0/0:-0,-10.84,-203.4	0/1:-87.1,-16.86,-229.01	0/0:-1.47,-10.24,-144.9	0/1:-94.3,-7.83,-40.7	0/0:-0.69,-7.83,-141.7
chr1	77924239	A	<INS:ME:Bov-A2>	PASS	TSD=null;ASSESS=4;INTERNAL=null,null;SVTYPE=Bov-A2;SVLEN=267;MEINFO=Bov-A2,1,268,-;DIFF=0.87:c25t,c32t,c54t,c87t,t90g,c103t,g110a,g144a,g198a,c218t,g231a,n238-269;LP=1;RP=7;RA=-2.807;PRIOR=false;SR=5	0/0:-0,-8.43,-168	0/0:-0.6,-12.04,-228.6	0/0:-0,-13.85,-275.3	0/0:-0,-9.03,-178.1	0/0:-1.2,-7.83,-133.2	0/0:-0,-9.03,-180	0/0:-0.6,-8.43,-156.6	0/0:-0.6,-13.25,-251.9	0/0:-0,-12.04,-235.6	0/0:-0.6,-9.63,-178.7	0/0:-0.6,-12.64,-239.5	0/1:-24,-6.62,-108	0/0:-0,-14.45,-286	0/0:-0,-9.63,-192	0/1:-24,-6.02,-96	0/0:-0.6,-7.83,-144.6	0/0:-0.6,-11.44,-216.6	0/0:-0.6,-7.22,-132.6	0/0:-0.6,-15.05,-288.6	0/0:-0,-6.02,-120	0/0:-0,-10.84,-216	0/0:-0,-7.22,-144	0/0:-0,-12.04,-240	0/1:-48,-10.84,-168	0/0:-0.6,-7.22,-132.6	0/0:-0.6,-11.44,-216.6	0/0:-0,-7.22,-144	0/1:-36,-10.24,-164.4	0/0:-0,-7.22,-144	0/0:-1.2,-13.25,-241.2	0/0:-0.6,-6.62,-119.5	0/0:-1.2,-12.04,-217.2	0/0:-0.6,-12.64,-240.6	0/0:-0,-13.25,-264	0/0:-1.2,-9.03,-157.2	0/0:-0,-9.63,-192	0/0:-0,-13.85,-276	0/0:-0,-7.22,-144
chr1	88093181	T	<INS:ME:Bov-A2>	PASS	TSD=TTTTTTTTT;ASSESS=5;INTERNAL=XR_003035750.1,INTRONIC;SVTYPE=Bov-A2;SVLEN=254;MEINFO=Bov-A2,14,268,+;DIFF=0.64:n1-13,g39a,c62t,c79a,c97a,g98c,g99a,c101t,c103t,n113-114,n117,n119,n124,n128-130,n132,n134-136,n139-141,n146,n152,g172t,c197t,g200t,g208t,n210,g219a,n259;LP=2;RP=4;RA=-1;PRIOR=false;SR=11	0/0:-0,-16.26,-316.6	0/0:-0,-6.62,-125	0/0:-0,-16.26,-314.4	0/0:-0,-8.43,-166.7	0/0:-0,-13.85,-269.6	0/0:-0,-15.05,-297.5	0/1:-84,-10.84,-123.3	0/0:-0,-7.22,-142	0/0:-0,-16.26,-316.8	0/0:-0,-7.22,-141	0/0:-0,-12.04,-236	0/0:-0,-8.43,-165.9	0/0:-1.2,-12.04,-201.2	0/0:-0.1,-11.44,-216.7	0/0:-0,-7.83,-149.7	0/0:-0,-7.83,-154	0/0:-0.13,-10.24,-196.6	0/0:-0.6,-3.61,-56.6	0/0:-0,-21.07,-412.9	0/0:-0,-12.04,-234.3	0/0:-0,-13.25,-257.1	0/0:-0,-4.82,-96	0/0:-0,-4.21,-80.6	0/0:-0,-8.43,-163.6	0/0:-0,-7.22,-142.5	0/0:-0,-6.02,-112.9	0/0:-0,-7.22,-137	0/0:-0,-7.22,-144	0/0:-0.6,-15.65,-285.5	0/0:-0,-11.44,-219.8	0/0:-0.6,-9.63,-178.6	0/0:-0,-10.24,-202.2	0/0:-0,-13.85,-266.1	0/0:-0,-9.63,-184	0/0:-0,-10.84,-212.1	0/0:-1.2,-9.63,-164.7	0/0:-0.6,-6.02,-107.4	0/0:-0,-5.42,-106.6
chr1	91500904	T	<INS:ME:Bov-A2>	PASS	TSD=AAGCAGTTCCT;ASSESS=5;INTERNAL=XM_024995415.1,INTRONIC;SVTYPE=Bov-A2;SVLEN=267;MEINFO=Bov-A2,1,268,+;DIFF=1:g88a,c97t,g99a,g110t,c114t,c123a,c130t,c136t,g202a,g219a,g241a,c266t;LP=29;RP=27;RA=0.103;PRIOR=false;SR=15	0/0:-0,-15.65,-312	0/0:-0,-7.83,-156	0/0:-0,-6.02,-120	0/0:-0,-5.42,-108	0/0:-0,-13.85,-274.8	0/0:-0,-15.65,-310	0/0:-0,-13.85,-276	0/0:-0,-12.04,-240	0/1:-80,-14.45,-192	0/1:-94,-10.24,-94	0/1:-122,-14.45,-140.6	0/0:-0,-4.82,-96	0/0:-0,-12.04,-240	0/0:-0,-12.04,-240	0/0:-0,-9.63,-192	0/0:-0,-7.22,-144	0/1:-66,-7.83,-84	0/0:-0,-6.02,-120	0/0:-0,-16.86,-333.1	0/1:-76,-6.02,-36	0/0:-0,-16.26,-324	0/0:-0,-4.21,-84	0/0:-0,-4.21,-84	0/0:-0,-9.63,-192	0/0:-0.6,-12.64,-240.6	0/0:-0,-14.45,-288	0/0:-0,-13.25,-264	0/0:-0,-8.43,-168	0/0:-0,-11.44,-228	0/0:-0,-15.05,-299.9	0/0:-0,-10.24,-204	0/0:-0,-10.84,-210.4	0/0:-0,-9.63,-192	0/0:-0,-11.44,-228	0/0:-0,-6.62,-132	0/1:-74,-9.03,-96	0/1:-136,-13.25,-108	0/0:-0,-5.42,-108
chr1	100243844	T	<INS:ME:Bov-A2>	PASS	TSD=AATAAGTGTTTT;ASSESS=5;INTERNAL=null,null;SVTYPE=Bov-A2;SVLEN=269;MEINFO=Bov-A2,0,269,-;DIFF=1:c17a,c18g,c54t,g88c,a92t,a102g,a105g,t138c,t142a,c180t,c230t,g247a,a253t;LP=5;RP=7;RA=-0.485;PRIOR=false;SR=5	0/0:-0,-16.86,-336	0/0:-0,-9.03,-180	0/0:-0,-13.25,-262	0/1:-32,-3.61,-36	0/0:-0,-12.64,-248.2	0/0:-0,-15.65,-310	0/0:-0,-12.04,-240	0/0:-0,-12.64,-252	0/0:-0,-19.87,-396	0/0:-0,-7.22,-144	0/0:-0,-13.25,-262.6	0/0:-0,-15.65,-312	0/0:-0,-12.64,-252	0/0:-0,-15.05,-300	0/0:-0,-11.44,-228	0/0:-0,-7.83,-156	0/0:-0,-4.82,-96	0/0:-0,-4.82,-96	0/0:-0,-13.25,-264	0/0:-0,-7.22,-144	0/0:-0,-12.64,-252	0/0:-0,-2.41,-48	0/0:-0,-3.01,-60	0/0:-0,-10.84,-216	0/0:-0,-7.22,-144	0/0:-0,-9.63,-192	0/0:-0,-13.85,-276	0/0:-0,-10.84,-216	0/0:-0,-11.44,-226	0/0:-0,-9.63,-191.6	0/0:-0,-11.44,-228	0/0:-0,-12.04,-240	0/0:-0,-10.84,-215.2	0/0:-0,-13.85,-276	0/0:-0,-6.02,-120	0/0:-0,-8.43,-168	0/0:-0,-12.64,-252	0/1:-72,-9.63,-108
chr1	100586106	T	<INS:ME:Bov-A2>	PASS	TSD=TTTTTTTTCAAAACT;ASSESS=5;INTERNAL=null,null;SVTYPE=Bov-A2;SVLEN=251;MEINFO=Bov-A2,17,268,+;DIFF=0.78:n1-16,c47t,c54t,g58a,g65t,g73a,c78a,g85t,c87t,g104a,c111g,c132t,g198a,c230a,c240a,c255t,n268-269;LP=1;RP=8;RA=-3;PRIOR=false;SR=5	0/0:-0,-15.05,-298	0/0:-0,-9.63,-192	0/0:-0,-15.65,-311.4	0/1:-48,-7.83,-108	0/0:-0.6,-10.84,-202.6	0/0:-0,-15.65,-312	0/0:-0,-16.26,-324	0/0:-0,-14.45,-288	0/0:-0,-18.66,-369.4	0/0:-0,-9.03,-178.8	0/0:-0,-13.25,-264	0/0:-0,-10.84,-212	0/0:-0,-13.85,-274	0/0:-0.6,-10.84,-204.6	0/0:-0,-6.62,-132	0/0:-0,-8.43,-166	0/0:-1.2,-10.84,-193.2	0/0:-0,-3.61,-72	0/0:-0,-13.85,-275.2	0/0:-0.6,-7.22,-132.6	0/0:-1.23,-12.64,-223.8	0/0:-0,-1.81,-36	0/0:-0,-6.02,-120	0/0:-0,-5.42,-108	0/0:-0,-10.84,-216	0/0:-1.2,-14.45,-264.4	0/0:-0,-12.64,-252	0/0:-0,-9.63,-191.4	0/0:-0,-16.26,-324	0/0:-0,-10.24,-200.8	0/0:-0.6,-12.04,-228.6	0/0:-0,-14.45,-288	0/0:-0,-12.64,-252	0/0:-0.6,-13.85,-264.6	0/0:-0,-8.43,-168	0/0:-0,-12.04,-240	0/0:-0,-8.43,-168	0/0:-0,-6.62,-132
chr1	102743391	T	<INS:ME:Bov-A2>	PASS	TSD=CACTAATGCAAT;ASSESS=5;INTERNAL=null,null;SVTYPE=Bov-A2;SVLEN=267;MEINFO=Bov-A2,1,268,+;DIFF=1:c54t,a68g,g88t,t90g,a92g,c103t,g112a,c114t,t115g,a137c,g151a,a253g;LP=93;RP=70;RA=0.41;PRIOR=false;SR=60	0/0:-0,-7.83,-156	1/1:-278.3,-17.46,-0.6	0/0:-0,-16.26,-323	1/1:-36.6,-2.41,-0.6	0/0:-0,-8.43,-168	0/1:-228,-19.27,-120	0/0:-0,-11.44,-228	0/0:-0,-9.63,-192	0/0:-0,-14.45,-288	0/0:-0,-6.62,-132	0/0:-0,-12.64,-250	1/1:-212.3,-12.64,-0	0/0:-0,-10.84,-216	0/0:-0,-10.24,-204	0/0:-0,-10.24,-204	0/0:-0,-9.03,-180	0/1:-124,-10.24,-60	0/0:-0,-3.61,-72	0/0:-0,-18.06,-360	0/1:-156,-15.05,-120	0/0:-0,-13.85,-276	0/0:-0,-4.82,-96	0/0:-0,-3.01,-60	0/1:-110,-13.85,-144	0/1:-110,-9.63,-60	1/1:-210,-12.64,-0	0/0:-0,-9.03,-179.5	0/0:-0,-9.63,-192	0/0:-0,-14.45,-288	0/0:-0,-16.26,-320.4	0/1:-166,-15.05,-108	0/0:-0,-15.65,-312	0/1:-117.8,-12.04,-92.53	0/0:-0,-10.84,-214	0/1:-62,-6.02,-48	0/1:-72,-7.22,-60	0/1:-84,-10.84,-120	0/0:-0,-8.43,-168
chr1	125393160	T	<INS:ME:Bov-A2>	PASS	TSD=null;ASSESS=3;INTERNAL=XM_024990533.1,INTRONIC;SVTYPE=Bov-A2;SVLEN=268;MEINFO=Bov-A2,1,269,-;DIFF=1:n1,c36t,c54t,g83c,g88a,g110a,c111t,c123g,c161t,g182a,g193a,g200t,g219a,c244t,t259g,t260c;LP=39;RP=49;RA=-0.329;PRIOR=false;SR=11	0/0:-0,-14.45,-288	0/1:-70,-8.43,-84	0/0:-0,-10.84,-216	0/0:-0,-9.63,-192	0/0:-0.6,-15.05,-288.6	0/0:-0,-10.84,-216	0/0:-0,-12.04,-240	0/0:-0,-7.83,-155.4	0/0:-0,-15.05,-294.5	0/0:-0,-9.03,-180	0/0:-0,-13.25,-264	1/1:-90.3,-6.02,-0.6	0/0:-0,-17.46,-347.2	0/0:-0,-13.85,-276	0/0:-0,-9.63,-192	0/0:-0,-9.03,-180	1/1:-171.7,-10.24,-0	0/0:-0,-12.64,-252	0/0:-0,-15.65,-309.3	0/1:-72,-13.85,-192	0/0:-0,-10.84,-216	0/0:-0,-3.61,-72	0/0:-0,-8.43,-168	0/0:-0,-9.03,-179	0/1:-134.9,-14.45,-105.82	0/0:-0,-10.24,-204	0/0:-0,-9.63,-192	0/0:-0,-10.84,-215.2	0/0:-0,-9.63,-192	0/0:-0,-15.05,-300	0/1:-142,-13.85,-108	0/0:-0,-13.25,-264	0/0:-0,-10.24,-204	0/1:-113.5,-10.84,-84	0/1:-146,-16.86,-168	0/0:-0,-8.43,-168	0/1:-154,-12.64,-72	0/0:-0,-3.61,-72
chr1	128280907	T	<INS:ME:Bov-A2>	PASS	TSD=null;ASSESS=3;INTERNAL=XM_024996122.1,INTRONIC;SVTYPE=Bov-A2;SVLEN=255;MEINFO=Bov-A2,13,268,+;DIFF=0:n1-12,n46,c54t,c103g,a118c,n164-269;LP=2;RP=1;RA=1;PRIOR=false;SR=5	0/0:-0,-10.84,-206	0/0:-0,-10.84,-214.8	0/0:-0,-17.46,-336.2	0/0:-0,-4.21,-84	0/0:-0,-9.63,-188	0/0:-0,-21.07,-419.5	0/0:-0,-13.25,-262.7	0/0:-0,-13.85,-269.8	0/0:-0,-10.84,-210.7	0/0:-0,-9.03,-180	0/0:-0,-11.44,-226	0/1:-90.2,-6.02,-24	0/0:-0,-12.64,-242	0/0:-0,-10.84,-213.1	0/0:-0,-6.02,-120	0/0:-0,-7.22,-144	0/0:-0,-6.02,-113.4	0/0:-0,-6.02,-120	0/0:-0.6,-13.25,-251.8	0/1:-102.2,-6.62,-22.43	0/0:-0,-6.02,-120	0/0:-0,-7.83,-156	0/0:-0,-7.22,-144	0/0:-0,-15.05,-298.3	0/0:-0,-10.84,-210	0/0:-0,-12.04,-237.5	0/0:-0,-8.43,-167.6	0/0:-0,-10.84,-214	0/0:-0,-10.84,-212	0/0:-0,-17.46,-347.6	0/0:-0,-10.84,-211.5	0/0:-0,-12.64,-251.2	0/0:-0,-14.45,-284.4	0/0:-0,-10.24,-203.9	0/0:-0,-5.42,-108	0/0:-0,-6.62,-132	0/1:-24,-4.82,-70	0/0:-0,-4.21,-84
chr1	130507088	G	<INS:ME:Bov-A2>	PASS	TSD=null;ASSESS=4;INTERNAL=XM_024996179.1,INTRONIC;SVTYPE=Bov-A2;SVLEN=269;MEINFO=Bov-A2,0,269,+;DIFF=1:c36t,c47a,c48t,c54t,c87t,a94t,c119t,a137g,c197t,a223c,g228a,g231t,c246t,c255t;LP=16;RP=12;RA=0.415;PRIOR=false;SR=4	0/0:-0,-14.45,-288	0/0:-0,-12.04,-238	0/0:-0,-12.04,-240	0/1:-82,-7.22,-48	0/0:-0.6,-10.84,-202.6	0/0:-0,-12.04,-240	0/0:-0,-10.24,-204	0/0:-0,-13.85,-276	0/0:-0,-15.65,-312	0/0:-0,-7.22,-144	0/0:-0,-13.85,-276	0/0:-0,-6.02,-120	0/0:-0,-11.44,-228	0/0:-0,-13.25,-264	0/0:-0,-6.02,-119.8	0/0:-0,-5.42,-108	0/0:-0,-10.24,-204	0/0:-0,-4.82,-96	0/0:-0,-10.24,-204	0/0:-0,-7.83,-156	0/0:-0,-8.43,-168	0/0:-0,-6.02,-118	0/0:-0,-8.43,-168	0/0:-0,-9.03,-180	0/0:-0,-3.61,-72	0/0:-0,-11.44,-228	0/0:-0,-14.45,-288	0/0:-0,-7.83,-156	0/0:-0,-11.44,-227.4	0/0:-0,-14.45,-288	0/0:-0,-12.64,-252	0/0:-0,-9.63,-192	0/0:-0,-10.84,-216	0/0:-0,-12.04,-240	0/0:-0,-12.64,-252	0/1:-178.1,-13.25,-45.1	0/0:-0,-10.84,-216	0/0:-0,-4.82,-96
chr1	140978349	G	<INS:ME:Bov-A2>	PASS	TSD=null;ASSESS=4;INTERNAL=null,null;SVTYPE=Bov-A2;SVLEN=267;MEINFO=Bov-A2,1,268,+;DIFF=1:c15t,c74t,c87t,g95c,g98a,c101g,a102g,c103t,t142c,a160c,g172a,t173c,g219a,a223g,g228c,g241a,g247a,c255t,n269;LP=135;RP=103;RA=0.39;PRIOR=false;SR=19	0/1:-50,-14.45,-218.2	0/0:-0,-6.62,-132	0/1:-60,-10.24,-128	0/1:-40,-10.24,-144	0/1:-74,-10.84,-132	0/0:-0,-7.22,-144	0/1:-163.3,-16.26,-122	0/1:-122,-17.46,-200	0/0:-0,-21.07,-418	0/0:-0,-13.85,-276	0/0:-0,-8.43,-168	0/0:-0,-5.42,-108	0/0:-0,-22.28,-442	0/0:-0,-10.24,-204	0/0:-0,-12.04,-240	0/0:-0,-6.02,-120	0/1:-84,-9.63,-94	0/0:-0,-10.24,-204	0/1:-30,-10.24,-162	0/1:-72,-12.64,-164	0/1:-50,-6.02,-58	0/0:-0,-8.43,-168	0/0:-0.6,-7.22,-122.5	0/0:-0,-6.62,-132	0/0:-0,-10.24,-204	0/0:-0,-15.05,-300	0/1:-90,-11.44,-115.4	0/1:-82,-11.44,-124	0/0:-0,-8.43,-168	0/0:-0,-10.84,-216	0/0:-0,-10.84,-216	0/0:-0,-15.05,-300	0/0:-0,-6.02,-120	0/1:-164,-13.85,-72	0/1:-84,-9.63,-94	0/0:-0,-2.41,-48	0/1:-70,-11.44,-128	0/0:-0,-6.62,-132
chr1	142106157	A	<INS:ME:Bov-A2>	PASS	TSD=AAAAAAAA;ASSESS=5;INTERNAL=XM_024996511.1,INTRONIC;SVTYPE=Bov-A2;SVLEN=267;MEINFO=Bov-A2,1,268,+;DIFF=0:n39,n52,g55a,n60-269;LP=1;RP=3;RA=-1.585;PRIOR=false;SR=4	0/1:-71.3,-8.43,-87.7	0/0:-0,-9.03,-163.5	0/1:-46.01,-8.43,-111.5	0/0:-0,-15.05,-300	0/0:-1.2,-13.85,-249.2	0/1:-56,-11.44,-165.1	0/0:-0,-8.43,-168	0/0:-0.6,-8.43,-150.2	0/0:-0,-9.03,-178.1	0/1:-22,-4.82,-64.3	0/1:-54.4,-5.42,-44.5	0/1:-20,-6.62,-102.4	0/0:-0,-15.65,-295.4	0/0:-0,-13.85,-273.2	0/0:-0,-3.01,-50	0/0:-0,-4.82,-86	0/0:-0,-13.25,-264	0/0:-0,-9.03,-180	0/0:-1.2,-10.84,-187.9	0/0:-0,-12.04,-239.7	0/1:-78,-10.84,-130	0/0:-0.6,-6.02,-93.2	0/0:-0.6,-15.05,-285.5	0/0:-0,-5.42,-98.3	0/0:-0,-6.02,-109.4	0/0:-0,-9.03,-168.7	0/0:-0,-5.42,-108	0/1:-85.9,-7.83,-60.29	0/1:-81.1,-11.44,-140	0/0:-0.6,-6.62,-116.6	0/0:-0,-11.44,-219.2	0/1:-47.1,-6.62,-75.2	0/0:-0,-8.43,-166	0/0:-0,-10.84,-214.3	0/0:-0,-13.25,-260.1	0/0:-0,-10.24,-203.1	0/0:-0.6,-15.05,-284.9	0/0:-0,-9.03,-176.9
chr1	142458017	T	<INS:ME:Bov-A2>	PASS	TSD=null;ASSESS=3;INTERNAL=null,null;SVTYPE=Bov-A2;SVLEN=267;MEINFO=Bov-A2,1,268,+;DIFF=0.88:t50g,g55a,a57g,a68g,a75c,g76a,c79t,a80g,g82t,t90a,a91c,g104a,g112a,n117-142,a152c,a160c,g172a,t173c,g185a,g198a,g219a,a223g,g225t,g247a,g256a;LP=84;RP=106;RA=-0.336;PRIOR=false;SR=73	0/1:-62.6,-12.64,-174	0/0:-0.6,-9.63,-174.6	0/1:-38.3,-12.64,-204.3	0/1:-165.2,-11.44,-48	0/1:-44.22,-10.84,-162.4	0/0:-0,-18.66,-370	0/1:-49.4,-9.03,-118.02	0/0:-0.6,-10.84,-200.6	0/1:-155.2,-15.05,-114.97	1/1:-138.3,-7.83,-0.6	0/1:-102.2,-8.43,-48.31	0/1:-54,-7.83,-94	0/0:-0,-16.86,-332.9	0/0:-0.6,-9.03,-165	0/0:-1.2,-9.03,-151.2	0/0:-0,-4.82,-96	0/1:-103.81,-7.83,-29.43	0/1:-35.4,-8.43,-118.03	0/0:-0,-16.86,-329.6	1/1:-87,-5.42,-0.13	0/1:-113.7,-12.04,-100.61	0/1:-94,-8.43,-52	1/1:-93.9,-6.02,-0.7	0/0:-0,-7.83,-156	0/1:-52,-7.22,-80	0/0:-0,-8.43,-168	0/0:-1.81,-13.85,-240.71	0/1:-72.5,-6.02,-36.01	0/1:-86.22,-13.85,-167.6	0/1:-38.8,-7.83,-102.68	0/0:-0,-7.22,-144	0/1:-40.2,-10.84,-167.91	0/0:-1.2,-8.43,-145.2	0/0:-0.67,-9.03,-157.3	0/0:-0,-9.63,-192	0/1:-70,-10.84,-140.6	1/1:-122.7,-7.83,-1.29	0/0:-1.2,-7.22,-121.2
chr1	144500931	G	<INS:ME:Bov-A2>	PASS	TSD=null;ASSESS=4;INTERNAL=NM_001206810.1,INTRONIC;SVTYPE=Bov-A2;SVLEN=267;MEINFO=Bov-A2,1,268,-;DIFF=1:g4c,c15t,c25t,a53g,c54t,t90a,g104a,a118c,c197t,g200a,c221t,t224c,g231a,a235t,c246t,a253t,g254t;LP=201;RP=419;RA=-1.06;PRIOR=false;SR=87	0/0:-0,-13.85,-262.5	0/1:-128.06,-21.67,-177.6	0/1:-41.41,-12.64,-169.58	0/1:-100.6,-13.85,-76.51	0/1:-74.6,-19.87,-265.7	1/1:-99.5,-11.44,-3.64	1/1:-75.1,-6.62,-2.67	1/1:-60.4,-4.82,-0.85	1/1:-82.4,-7.83,-3.12	0/1:-119.88,-12.04,-15.66	1/1:-61.7,-6.62,-2.7	0/1:-57.4,-16.26,-219.14	1/1:-29.9,-3.61,-1.89	1/1:-61.54,-6.02,-4.19	0/1:-59.9,-9.03,-41.85	1/1:-33.79,-3.61,-3.59	0/1:-79.6,-11.44,-83.31	1/1:-81.1,-7.83,-3.14	1/1:-78.2,-8.43,-2.64	0/0:-2.24,-13.85,-221.11	1/1:-38,-4.82,-3.28	1/1:-62.8,-6.02,-1.47	0/1:-67.8,-13.25,-130	1/1:-91.9,-7.22,-0.77	1/1:-138.31,-13.85,-3.87	0/1:-187.95,-25.29,-147.93	1/1:-53.1,-4.82,-0.82	1/1:-53.1,-4.82,-1.03	0/1:-95.69,-16.86,-169.36	1/1:-80.2,-7.22,-3.14	0/1:-121.34,-21.67,-170.47	1/1:-100.5,-10.24,-3.81	1/1:-77.5,-8.43,-3.25	1/1:-97,-7.83,-1.78	1/1:-28.9,-3.61,-1.49	0/1:-52.5,-7.22,-36.68	1/1:-58.2,-7.22,-2.82	0/1:-27.2,-7.83,-100.13
chr1	149267910	C	<INS:ME:Bov-A2>	PASS	TSD=CC;ASSESS=5;INTERNAL=XM_003585709.4,INTRONIC;SVTYPE=Bov-A2;SVLEN=267;MEINFO=Bov-A2,1,268,+;DIFF=0:n1-206,t224c,g231a,n262;LP=1;RP=3;RA=-1.585;PRIOR=false;SR=6	0/0:-0,-13.85,-270.6	0/1:-68.1,-8.43,-82.53	0/0:-0,-12.04,-227.5	0/0:-0.6,-10.24,-187.7	0/0:-0,-7.22,-141.3	0/0:-0,-16.26,-316.4	0/0:-0,-12.64,-247.4	0/0:-0,-5.42,-105.2	0/0:-1.2,-11.44,-200.9	0/0:-0,-11.44,-224.6	0/0:-0,-14.45,-275.9	0/0:-0.6,-5.42,-96.6	0/0:-0,-23.48,-463.4	0/0:-0,-8.43,-162.4	0/0:-0,-4.21,-84	0/0:-0,-3.01,-60	0/1:-80.7,-8.43,-84	0/0:-0,-11.44,-228	0/0:-0,-13.25,-261.2	0/1:-60,-10.84,-156	0/0:-0,-16.26,-309.5	0/0:-0,-7.22,-144	0/1:-76.7,-16.26,-240.1	0/0:-0,-10.24,-194.5	0/1:-43.6,-7.22,-84.15	0/1:-57.2,-5.42,-36.02	0/0:-0,-7.83,-148.2	0/0:-0,-11.44,-226.6	0/0:-0.6,-11.44,-204.3	0/0:-0.01,-9.63,-185.2	0/1:-97.2,-8.43,-48	0/0:-0.01,-13.85,-263.1	0/0:-0,-7.83,-151.5	0/0:-0,-13.25,-248.2	0/0:-0,-10.24,-204	0/1:-36,-7.83,-120	0/0:-1.2,-9.63,-169.2	0/0:-0,-7.83,-156
chr1	150477510	T	<INS:ME:Bov-A2>	PASS	TSD=null;ASSESS=3;INTERNAL=null,null;SVTYPE=Bov-A2;SVLEN=267;MEINFO=Bov-A2,1,268,+;DIFF=0.98:c37t,c54t,g66t,t67c,a68g,g76a,a102g,g110t,c111t,a113g,t115c,a187g,g198a,g219a,c255t,n265-269;LP=34;RP=32;RA=0.087;PRIOR=false;SR=17	0/0:-0,-17.46,-348	0/0:-0,-18.06,-358	0/0:-0,-15.65,-312	0/0:-0,-13.85,-276	0/0:-0,-10.84,-216	0/0:-0,-9.63,-192	0/0:-0,-13.25,-264	0/0:-0,-8.43,-168	0/0:-0,-14.45,-288	0/0:-0,-6.62,-132	0/0:-0,-16.26,-324	0/0:-0,-7.22,-142.4	0/0:-0,-15.65,-310	0/0:-0,-12.64,-251.1	0/0:-0,-8.43,-168	0/0:-0,-6.62,-132	0/1:-82.1,-10.84,-90.23	0/0:-0,-9.63,-192	0/0:-0,-14.45,-288	0/0:-1.2,-8.43,-145.2	0/0:-0,-9.63,-192	0/0:-0,-5.42,-108	0/0:-0,-9.03,-180	0/1:-30,-8.43,-116.7	0/0:-0.6,-6.02,-100.6	0/0:-0,-12.64,-252	0/0:-0,-9.03,-180	0/0:-0,-11.44,-228	0/0:-0,-10.84,-214	0/0:-0,-13.25,-264	0/0:-0,-8.43,-168	0/0:-0,-13.25,-264	0/0:-0,-12.04,-240	0/0:-0,-13.85,-276	0/0:-0,-9.63,-192	0/0:-1.2,-7.22,-117.2	0/0:-0,-8.43,-168	0/0:-0,-10.24,-204
chr1	155136317	T	<INS:ME:Bov-A2>	PASS	TSD=ACTTCACT;ASSESS=5;INTERNAL=null,null;SVTYPE=Bov-A2;SVLEN=267;MEINFO=Bov-A2,1,268,-;DIFF=0.45:n29,g35t,t38g,c47g,a68t,g73a,a75t,c87t,t90a,c97t,g99a,c111t,t142c,a148c,n162-166,a196g,g198a,g201a,c217a,c218t,a223c,t229c,g231a,c246t,t250c,c255t;LP=34;RP=13;RA=1.387;PRIOR=false;SR=98	0/1:-44.1,-12.04,-190	0/1:-36.8,-7.22,-96.03	0/1:-86.3,-8.43,-72	0/1:-152.7,-10.24,-34.01	0/1:-20.2,-6.62,-108	0/1:-75.3,-12.04,-154.02	0/1:-70.1,-12.04,-167.5	0/1:-134.47,-12.04,-72.6	0/1:-130.92,-14.45,-125.73	0/0:-0,-9.03,-180	0/1:-82.6,-7.22,-44.92	0/1:-34.8,-6.02,-84	0/1:-77,-12.64,-167.7	0/1:-34.01,-10.84,-171.4	0/0:-0,-7.22,-144	0/0:-0,-4.82,-96	0/1:-90.7,-9.63,-92.2	0/0:-1.23,-10.84,-188.4	0/1:-82.3,-11.44,-136.3	1/1:-95.3,-6.02,-0.61	0/0:-0.61,-4.82,-80.7	1/1:-83,-4.82,-0	0/1:-139,-15.05,-156	0/0:-0,-7.83,-152	0/0:-0,-4.82,-96	0/1:-44.5,-12.04,-192	0/1:-106.03,-9.63,-61.3	0/1:-84.2,-7.22,-44.4	0/1:-62.6,-9.63,-106.93	0/1:-99.5,-10.24,-91.91	0/0:-0,-9.03,-178.9	0/0:-0,-8.43,-168	0/1:-76.3,-12.04,-156	0/0:-0,-9.03,-180	0/0:-0,-20.47,-408	0/1:-88.2,-7.83,-58	0/1:-164.9,-12.04,-58	0/0:-1.2,-8.43,-143.2
chr1	155299691	G	<INS:ME:Bov-A2>	PASS	TSD=CCAAAAAGG;ASSESS=5;INTERNAL=null,null;SVTYPE=Bov-A2;SVLEN=267;MEINFO=Bov-A2,1,268,+;DIFF=0.97:g52a,c54t,c62g,a68g,g88a,c103t,c111t,t129a,g198a,g231a,c255t;LP=66;RP=48;RA=0.459;PRIOR=false;SR=64	0/0:-0,-13.85,-274	1/1:-129.2,-8.43,-1.2	0/1:-100,-10.84,-108	0/0:-0,-4.82,-96	0/0:-0,-9.63,-191.1	0/1:-102,-12.04,-132	0/0:-0,-9.63,-192	0/1:-100,-10.84,-108	0/0:-0,-22.88,-456	0/0:-0,-3.61,-72	0/1:-194,-13.85,-58.1	0/0:-0,-12.04,-240	1/1:-274,-15.05,-0	0/0:-0,-9.63,-190	0/0:-0.05,-10.84,-209	0/0:-0,-7.22,-144	0/0:-0,-10.24,-204	0/0:-0,-6.62,-132	1/1:-177.2,-10.84,-1.2	0/0:-0,-9.03,-180	0/0:-0,-17.46,-348	1/1:-211.6,-12.04,-0	0/0:-0,-5.42,-108	0/0:-0,-10.84,-216	0/1:-64,-8.43,-96	1/1:-264.6,-15.65,-0.6	0/0:-0,-14.45,-286	0/1:-54,-10.84,-155.2	0/0:-0,-13.85,-276	0/0:-0,-11.44,-228	0/1:-106,-13.25,-144	0/0:-0,-15.05,-300	0/0:-0,-13.85,-272.4	0/0:-0,-10.84,-214	0/0:-0,-9.03,-180	0/0:-0,-7.83,-156	0/0:-0,-11.44,-228	0/0:-0,-8.43,-168
chr1	156116877	A	<INS:ME:Bov-A2>	PASS	TSD=TTCACTTTCACTTTCA;ASSESS=5;INTERNAL=null,null;SVTYPE=Bov-A2;SVLEN=267;MEINFO=Bov-A2,1,268,-;DIFF=0.92:g35t,a41t,c54t,a68g,g69c,a92g,t138c,g139a,a164c,t171c,g200a,g201a,g204c,g211a,g216a,c218a,t222c,c232a,c234a,g247a,n252-253,n257,n261-269;LP=57;RP=55;RA=0.052;PRIOR=false;SR=9	0/0:-0.43,-10.84,-200.1	0/0:-1.2,-15.05,-263.6	0/0:-0,-9.63,-190	0/0:-0,-6.62,-132	0/0:-0,-9.63,-192	0/0:-0,-9.03,-180	0/0:-0,-11.44,-228	0/0:-0,-9.03,-180	0/0:-0,-15.65,-312	0/0:-0,-10.24,-199.4	0/1:-91.6,-14.45,-163.8	0/0:-0,-3.61,-72	0/0:-0,-13.85,-274.6	0/0:-0,-11.44,-228	0/0:-0,-7.83,-156	0/0:-0,-7.22,-144	0/0:-0,-7.22,-144	0/0:-0,-11.44,-228	0/1:-70,-12.04,-150	0/0:-0,-12.64,-252	0/0:-0,-6.62,-132	0/1:-30,-6.62,-96	0/1:-60.3,-10.84,-136	0/0:-0.6,-6.62,-116.2	0/1:-40,-7.83,-102.6	0/0:-0,-9.63,-192	0/1:-112.7,-11.44,-88.7	0/0:-0.01,-15.65,-304.6	0/0:-0,-11.44,-226	0/0:-0,-13.25,-264	0/1:-63.6,-16.26,-240.6	0/1:-68.7,-10.84,-119.6	0/1:-76.6,-15.65,-215.7	0/0:-0,-11.44,-226.2	0/0:-0,-11.44,-228	0/0:-0,-3.01,-60	0/1:-42,-9.03,-132	0/0:-0.6,-10.24,-192.6
chr2	262539	A	<INS:ME:Bov-A2>	PASS	TSD=null;ASSESS=3;INTERNAL=null,null;SVTYPE=Bov-A2;SVLEN=267;MEINFO=Bov-A2,1,268,+;DIFF=0.48:c9a,c17a,c18t,t23c,t28c,c54t,g59a,g66a,c71t,g73a,c78t,t90a,g112a,t115g,c123a,n171-269;LP=22;RP=44;RA=-1;PRIOR=false;SR=45	0/0:-0,-21.67,-432	0/1:-51.02,-14.45,-193.28	0/0:-0,-15.65,-312	0/1:-23.9,-4.82,-60.01	0/0:-0,-16.86,-336	0/0:-1.42,-16.26,-265.2	0/0:-0.02,-15.05,-293.1	0/0:-1.2,-13.25,-237.1	0/0:-0,-17.46,-346.2	0/0:-0,-7.83,-156	0/0:-0.61,-22.28,-421.2	0/0:-0,-8.43,-166	0/0:-0,-15.65,-303.9	0/0:-0,-11.44,-228	0/0:-0.73,-9.63,-171.8	0/0:-0,-4.21,-84	0/0:-1.89,-12.04,-186.7	0/0:-0,-6.02,-120	0/0:-0,-20.47,-408	0/1:-55.2,-13.25,-156.33	0/0:-0,-22.88,-456	0/0:-0,-4.21,-84	0/0:-0,-4.82,-96	0/0:-0.6,-12.04,-224.3	0/0:-0,-7.83,-156	0/1:-64.19,-17.46,-222.65	0/1:-36.53,-20.47,-325.69	0/0:-0,-13.85,-276	0/0:-1.21,-13.85,-244.8	0/0:-0.12,-14.45,-263.5	0/0:-1.2,-9.63,-159.7	0/0:-0,-10.24,-204	0/0:-0,-15.65,-312	0/0:-0,-7.83,-156	0/0:-0.6,-8.43,-156.6	0/0:-0,-7.22,-144	0/1:-31.7,-7.83,-108.06	0/0:-0,-6.62,-132
chr2	3335222	T	<INS:ME:Bov-A2>	PASS	TSD=null;ASSESS=3;INTERNAL=null,null;SVTYPE=Bov-A2;SVLEN=267;MEINFO=Bov-A2,1,268,+;DIFF=0.32:c24t,n41-70,c74t,g83a,c101g,c103t,c111t,c114a,c197t,g202a,g216t,g228a,n255-269;LP=5;RP=4;RA=0.322;PRIOR=false;SR=6	0/0:-0,-13.85,-276	0/0:-0,-7.22,-144	0/0:-0,-12.04,-238.5	0/0:-0,-4.82,-96	0/0:-0,-12.04,-240	0/1:-84,-16.86,-252	0/0:-0,-16.26,-323.7	0/0:-0,-10.24,-204	0/0:-0,-16.26,-324	0/0:-0,-9.63,-192	0/0:-0,-13.85,-276	0/0:-0,-7.83,-156	0/0:-0,-15.65,-312	0/0:-1.81,-16.26,-289.81	0/0:-0,-12.64,-252	0/0:-0,-4.82,-96	0/0:-0,-6.02,-120	0/0:-1.2,-9.03,-157.2	0/0:-0,-11.44,-228	0/0:-0,-7.83,-156	0/0:-0,-17.46,-348	0/0:-0,-4.82,-96	0/0:-0,-6.02,-120	0/0:-0,-10.24,-204	0/0:-0,-10.24,-204	0/0:-0,-12.64,-252	0/0:-0,-8.43,-168	0/0:-0,-10.84,-216	0/0:-0,-14.45,-286	0/0:-0,-12.64,-252	0/0:-0,-6.62,-132	0/0:-0,-15.65,-312	0/0:-0,-15.65,-312	0/0:-0,-9.03,-180	0/0:-0,-3.61,-72	0/0:-0,-7.22,-144	0/0:-0,-7.83,-156	0/0:-0,-4.82,-96
chr2	4126963	C	<INS:ME:Bov-A2>	PASS	TSD=dGTGCCATTT;ASSESS=5;INTERNAL=null,null;SVTYPE=Bov-A2;SVLEN=267;MEINFO=Bov-A2,1,268,-;DIFF=0.4:a5g,c9a,a42g,g55a,t67g,a68g,g73a,c74t,g88a,t90a,c97t,c103t,g104a,g112a,n121-269;LP=43;RP=42;RA=0.034;PRIOR=false;SR=114	0/1:-36.01,-8.43,-123.8	0/1:-76.9,-10.84,-114.31	0/0:-0.03,-15.65,-307.2	0/1:-118.25,-15.65,-175.6	0/0:-0,-7.83,-156	0/0:-0,-12.04,-238	0/0:-0.6,-7.83,-141.3	0/0:-0,-7.83,-156	0/1:-96.02,-11.44,-112.9	0/1:-40.3,-5.42,-58	0/0:-0,-14.45,-286	0/0:-0.6,-1.81,-24.6	0/0:-0,-10.24,-204	0/0:-0,-9.03,-178.9	0/1:-54.2,-7.22,-70.13	0/0:-0,-4.21,-84	0/1:-65.08,-8.43,-80.81	0/0:-0,-9.03,-180	0/1:-112.74,-16.86,-195.3	0/1:-34.13,-4.21,-40.6	0/0:-0,-12.04,-240	0/1:-85.1,-7.83,-54	0/1:-71.4,-15.65,-212.63	0/1:-34.7,-3.61,-34	0/0:-0,-9.03,-180	0/0:-0.6,-9.63,-180.6	0/0:-0,-9.63,-192	0/1:-36,-13.25,-222.1	0/1:-44,-7.83,-106	0/0:-0,-6.62,-132	0/1:-31.7,-5.42,-70	0/1:-137.22,-11.44,-75.3	0/0:-0,-12.64,-252	0/1:-68.1,-7.83,-78	0/0:-0,-16.26,-324	0/1:-48.06,-9.63,-138.9	0/1:-93.4,-12.64,-129.51	0/1:-48,-5.42,-58
chr2	6671291	C	<INS:ME:Bov-A2>	PASS	TSD=AAAAAAGTCCC;ASSESS=5;INTERNAL=NM_001034680.2,EXON_4;SVTYPE=Bov-A2;SVLEN=267;MEINFO=Bov-A2,1,268,+;DIFF=0.99:a44c,t45c,c54t,a68g,g88t,c89g,t90g,g93a,c111t,a137c,c197t,g219a,c221g,a223g,g226a,c230g,g241a,c255t,n266-269;LP=75;RP=12;RA=2.644;PRIOR=false;SR=10	0/0:-1.81,-15.65,-272.71	0/0:-0,-4.21,-83	0/0:-1.2,-18.66,-346.9	0/1:-48.2,-18.06,-275.06	0/0:-0.66,-12.64,-231.3	0/0:-0,-12.64,-247.3	0/0:-0.6,-21.07,-393.6	0/1:-33.2,-10.24,-152.8	0/0:-0,-12.04,-237.6	0/0:-0,-6.62,-123.2	0/0:-0,-10.84,-214	0/1:-69.7,-14.45,-170.09	0/0:-0,-15.65,-291.2	0/0:-0,-9.03,-178.7	0/1:-88.66,-15.65,-134.58	0/0:-0,-7.83,-149.2	0/0:-0.6,-7.83,-137.6	0/1:-32.5,-11.44,-180.01	0/0:-0,-12.64,-251.6	0/0:-0.6,-9.03,-161.7	0/0:-0,-16.86,-332.7	0/1:-23.55,-8.43,-106.6	0/1:-20.8,-13.25,-211.95	0/0:-1.2,-10.24,-167.2	0/1:-77.4,-13.85,-166.5	0/0:-0,-10.24,-200.4	0/0:-0,-9.63,-192	0/1:-30.5,-13.25,-195.79	0/0:-0,-14.45,-287.9	0/0:-0,-12.64,-245	0/1:-50.2,-15.05,-203.93	0/0:-1.2,-11.44,-205.2	0/0:-0,-15.05,-300	0/0:-0.6,-12.64,-237.9	0/1:-23,-13.85,-228.04	0/1:-47.3,-8.43,-105.7	0/1:-31.4,-10.24,-156.3	0/0:-0,-7.22,-144
chr2	7761855	A	<INS:ME:Bov-A2>	PASS	TSD=AAGTTCTTTGCA;ASSESS=5;INTERNAL=null,null;SVTYPE=Bov-A2;SVLEN=260;MEINFO=Bov-A2,8,268,-;DIFF=0.94:n1-7,c15t,n29,t33c,g95a,a109c,c158t,c197t,d199,n207,g219a,a223c,g231a,g241a,c266t,n269-269;LP=35;RP=34;RA=0.042;PRIOR=false;SR=6	0/0:-0.6,-15.65,-298.6	0/1:-70.9,-9.03,-80	0/0:-0,-8.43,-168	0/1:-70.2,-7.22,-60	0/0:-0,-9.63,-192	0/0:-0,-10.24,-204	0/0:-0,-7.22,-144	0/0:-0,-14.45,-287.8	0/0:-0,-17.46,-348	0/0:-0,-6.02,-120	0/0:-0,-15.05,-293.3	0/0:-0,-12.64,-250.4	0/0:-0,-11.44,-226	0/0:-0,-12.64,-250	0/0:-0,-6.62,-132	0/0:-0,-6.02,-118	0/1:-76.7,-10.24,-108.08	0/0:-0,-6.02,-120	0/0:-0.6,-11.44,-214.6	0/0:-0,-9.63,-192	0/0:-0,-10.24,-204	0/0:-0,-7.83,-150	0/0:-0,-8.43,-166	0/1:-73.99,-9.63,-69.44	0/0:-0,-12.64,-252	0/1:-61.4,-9.03,-96.02	0/0:-0,-9.03,-176	0/0:-0,-11.44,-228	1/1:-146.4,-10.84,-2.02	0/0:-0,-11.44,-228	0/0:-0,-9.63,-192	0/0:-0,-12.64,-252	0/0:-0,-14.45,-287.2	0/0:-0,-13.85,-276	0/0:-0,-12.64,-252	0/0:-0,-10.84,-216	0/0:-0,-9.03,-180	0/0:-0,-7.83,-156
chr2	8434255	A	<INS:ME:Bov-A2>	PASS	TSD=AAAAAAAAAAA;ASSESS=5;INTERNAL=null,null;SVTYPE=Bov-A2;SVLEN=267;MEINFO=Bov-A2,1,268,-;DIFF=0.71:c54t,g83a,g88a,t129c,n193,n203-269;LP=38;RP=12;RA=1.663;PRIOR=false;SR=19	0/1:-58.03,-13.25,-180.6	0/0:-0,-7.83,-148.8	0/1:-55.5,-9.63,-122.5	0/0:-0,-10.84,-206.8	0/1:-42,-7.22,-92	0/0:-1.2,-8.43,-129.7	0/0:-1.2,-8.43,-137.2	0/0:-0,-7.22,-134	0/1:-42.01,-9.03,-123.8	0/0:-0.61,-8.43,-142.7	0/0:-0.6,-12.04,-216.5	0/0:-0,-9.03,-173.3	0/0:-0,-13.85,-257.9	0/0:-0,-9.63,-187.8	0/0:-0,-3.01,-47	0/0:-0,-6.02,-112	0/0:-0,-4.21,-80	0/0:-0.73,-9.03,-161.2	0/0:-0,-9.63,-181.6	0/0:-0,-6.62,-129.5	0/1:-34,-10.24,-156	0/0:-0,-3.61,-65.6	0/0:-0.6,-5.42,-88.6	0/0:-0,-7.22,-129.9	0/0:-0,-9.03,-160	0/0:-0,-11.44,-208.2	0/0:-0.6,-7.22,-122.1	0/1:-88.7,-7.83,-56	0/0:-0,-10.84,-200.7	0/0:-0.13,-6.62,-122.6	0/0:-0,-9.03,-168.3	0/1:-42.03,-12.64,-186.9	0/0:-0,-12.04,-229.7	0/1:-22.03,-6.02,-89.2	0/0:-0.6,-12.64,-218.3	0/0:-0.6,-3.01,-46.6	0/0:-0,-6.02,-116.6	0/0:-0.15,-9.63,-171.3
chr2	8436220	T	<INS:ME:Bov-A2>	PASS	TSD=null;ASSESS=3;INTERNAL=null,null;SVTYPE=Bov-A2;SVLEN=269;MEINFO=Bov-A2,0,269,-;DIFF=0.99:c54t,g83a,g88a,t129c,c218a,t222c,a223g,g247t,a253g,c255t,a257c,c263a,n268-269;LP=29;RP=150;RA=-2.371;PRIOR=false;SR=29	0/1:-62,-13.85,-204	0/0:-0,-6.62,-132	0/1:-50,-12.64,-192	0/1:-52,-4.21,-24	0/1:-70,-13.25,-180	1/1:-146,-8.43,-0	0/1:-54,-8.43,-108	0/0:-0,-9.03,-180	0/0:-1.2,-10.24,-181.2	1/1:-91.6,-5.42,-0	0/0:-0,-10.24,-204	0/0:-0,-14.45,-288	0/0:-0,-16.26,-324	0/0:-0,-12.64,-252	1/1:-124,-7.22,-0	0/0:-0.6,-3.01,-48.6	1/1:-180.6,-11.44,-0.6	1/1:-52.6,-3.61,-0.6	0/0:-0,-10.84,-213.9	0/0:-0,-5.42,-108	1/1:-102,-6.02,-0	1/1:-30,-1.81,-0	1/1:-42.6,-3.01,-0.6	0/1:-94,-15.65,-203.8	0/1:-62,-5.42,-36	0/0:-0,-6.02,-118	0/1:-70,-12.64,-168	1/1:-102,-6.02,-0	0/0:-0,-14.45,-288	0/1:-30,-7.22,-108	0/0:-0.6,-4.21,-72.6	0/1:-42,-9.03,-132	0/0:-0,-16.86,-336	1/1:-89.2,-5.42,-0	1/1:-52.6,-3.61,-0.6	1/1:-120.3,-7.22,-0	0/1:-139.8,-12.04,-72	0/0:-0,-9.03,-180
chr2	8710862	A	<INS:ME:Bov-A2>	PASS	TSD=null;ASSESS=4;INTERNAL=null,null;SVTYPE=Bov-A2;SVLEN=269;MEINFO=Bov-A2,0,269,+;DIFF=1:c30g,c54t,i97c,t133g,a159g,c197t,g202a,a203g,g219a,c246t,c255g,a261g;LP=187;RP=247;RA=-0.401;PRIOR=false;SR=81	0/1:-144.8,-16.86,-156.08	0/1:-98.2,-12.64,-128	0/0:-0,-9.63,-190	0/1:-84,-7.83,-60	0/1:-96,-9.63,-84	0/1:-185.1,-12.64,-36	0/1:-35.2,-10.24,-156	1/1:-274.3,-17.46,-1.21	0/1:-221.7,-16.26,-60	0/1:-50,-7.83,-94	0/0:-0,-11.44,-228	0/1:-124,-10.24,-44.3	0/0:-0,-18.06,-360	0/1:-140,-14.45,-120	0/1:-193.7,-14.45,-56	0/0:-0,-7.22,-142	0/1:-94,-9.63,-84	0/1:-142,-13.25,-96	0/1:-191.4,-13.85,-48	0/1:-236,-16.86,-60	0/1:-84,-13.25,-168	0/0:-0,-7.83,-156	0/1:-110,-13.85,-144	0/1:-150.2,-11.44,-40	0/1:-181.6,-15.05,-73.2	0/1:-141.5,-11.44,-53.9	0/0:-0,-3.61,-72	0/0:-0,-11.44,-227.4	0/1:-132,-15.05,-144	1/1:-280.31,-18.66,-1.81	0/1:-108.6,-13.25,-128	0/1:-72,-14.45,-200.5	1/1:-143,-9.63,-1.2	0/0:-0,-11.44,-228	0/1:-218,-16.26,-72	0/1:-152,-10.84,-36	0/1:-106,-9.63,-72	0/0:-0.6,-8.43,-156.6
chr2	10471683	A	<INS:ME:Bov-A2>	PASS	TSD=TTTTAAATGTAGTTTA;ASSESS=5;INTERNAL=null,null;SVTYPE=Bov-A2;SVLEN=267;MEINFO=Bov-A2,1,268,+;DIFF=0.61:g8a,c17g,c30t,g39a,a42g,g51a,g55a,a91g,a92g,a102c,c111t,a137g,n157,g172a,t173g,n184,g185a,g193t,g198a,g200a,n222-222,n229,n234,n236-237,n241,n259,a264c,g265t;LP=3;RP=7;RA=-1.222;PRIOR=false;SR=34	0/1:-48,-16.26,-261.4	0/0:-0,-15.05,-282.2	0/1:-60,-10.24,-131.7	0/0:-0,-4.82,-96	0/0:-0,-11.44,-222	0/1:-58,-10.24,-135.2	0/1:-36.43,-10.84,-165.7	0/0:-1.81,-13.85,-235.51	0/0:-0.13,-14.45,-277.8	0/0:-0,-9.63,-186	0/0:-0,-9.63,-192	0/0:-0,-4.82,-90	0/0:-0,-15.65,-308.5	0/0:-0,-18.66,-369.2	0/0:-0.6,-9.03,-151.3	0/1:-46,-7.22,-84.1	0/0:-0,-10.24,-189.1	0/0:-0.03,-6.02,-114.9	0/0:-0,-14.45,-286.5	0/0:-0,-4.82,-94.5	0/0:-0.6,-13.85,-264.6	0/0:-0,-3.01,-53.6	0/0:-0,-4.82,-94	0/0:-0,-7.83,-140.5	0/0:-0,-2.41,-46	0/0:-0,-9.03,-170	0/0:-0,-7.22,-137.9	0/0:-0,-12.64,-250.6	0/0:-0,-11.44,-224.2	0/0:-0.6,-10.24,-186	0/0:-0,-9.63,-176.4	0/0:-0,-11.44,-225.3	0/1:-36.01,-10.24,-149.4	0/0:-1.21,-9.63,-159.2	0/0:-0,-11.44,-228	0/0:-0,-6.02,-120	0/0:-0,-7.22,-142.5	0/0:-0,-9.03,-180
chr2	13052660	C	<INS:ME:Bov-A2>	PASS	TSD=null;ASSESS=4;INTERNAL=null,null;SVTYPE=Bov-A2;SVLEN=269;MEINFO=Bov-A2,0,269,+;DIFF=1:c17a,c54t,g69t,g76a,g98c,a100g,g112a,t138c,g226a,g231t,a235g,c240t,c266t;LP=27;RP=13;RA=1.054;PRIOR=false;SR=13	0/0:-0,-18.66,-348.1	0/0:-0,-9.03,-140.1	0/0:-0,-11.44,-220.1	0/0:-0.6,-9.63,-177.5	1/1:-49.9,-4.82,-0.37	0/0:-0.01,-12.04,-225.1	0/0:-0,-10.24,-189.4	0/0:-0,-13.25,-252.3	0/0:-0,-14.45,-278.1	0/0:-0.01,-9.63,-150.1	0/0:-0,-12.64,-240.9	0/1:-34.1,-9.63,-98.4	0/0:-0,-10.84,-183.3	0/0:-0,-12.04,-230.8	0/0:-0.38,-10.24,-154	0/0:-0,-8.43,-136.5	0/0:-0,-7.83,-151.3	0/0:-0,-7.83,-144.3	0/0:-0.88,-15.05,-260.8	0/0:-0,-4.82,-92.2	0/0:-0,-13.85,-264.3	0/0:-1.49,-7.22,-92.3	0/0:-0,-8.43,-160.7	1/1:-27.6,-2.41,-0.22	0/0:-0,-6.62,-110.5	0/0:-0.18,-13.85,-200.7	0/0:-0,-10.84,-211.8	0/0:-0.01,-12.04,-225.2	0/1:-77.5,-13.25,-128.87	0/0:-0,-12.04,-237.8	0/0:-0.01,-9.63,-153.8	0/0:-0,-12.04,-231	0/0:-0,-9.63,-185.8	0/0:-0,-10.84,-198.8	0/0:-0,-10.84,-206.9	0/1:-18.2,-3.01,-20.51	0/1:-69.1,-11.44,-114.7	0/0:-0,-7.83,-145.9
chr2	13501214	A	<INS:ME:Bov-A2>	PASS	TSD=null;ASSESS=3;INTERNAL=null,null;SVTYPE=Bov-A2;SVLEN=267;MEINFO=Bov-A2,1,268,+;DIFF=0.84:c17a,a92g,g98a,c101t,c103t,c125g,c140t,c197t,g247a,n264-269;LP=6;RP=12;RA=-1;PRIOR=false;SR=8	0/0:-0,-11.44,-226.5	0/1:-69.6,-13.85,-202	0/0:-0,-17.46,-344	0/1:-60,-5.42,-48	0/1:-46,-9.63,-137.2	0/1:-72.03,-13.25,-182.4	0/0:-0,-13.85,-276	0/0:-0,-13.25,-258.9	0/0:-0,-12.64,-244.9	0/0:-0.05,-5.42,-103	0/0:-1.2,-10.24,-177.2	0/1:-95,-11.44,-132	0/0:-0,-12.64,-242.9	0/0:-0,-10.84,-213.3	0/0:-0,-9.03,-180	0/0:-0,-8.43,-168	0/0:-0,-8.43,-164.3	0/0:-0,-7.22,-144	0/0:-0,-15.65,-308.4	0/0:-0,-9.03,-176.5	0/0:-0,-17.46,-348	0/0:-0,-4.21,-84	0/1:-36,-5.42,-72	0/0:-0,-6.62,-132	0/0:-0,-6.62,-132	0/0:-0,-11.44,-225	0/0:-0,-11.44,-225.3	0/0:-0,-7.22,-141.5	0/1:-49.31,-12.64,-177.64	0/0:-0,-8.43,-167.5	0/1:-81.6,-12.64,-165.6	0/0:-0,-12.64,-248.3	0/0:-1.33,-13.85,-237.6	0/0:-0,-12.64,-251	0/0:-0,-15.65,-307.1	0/0:-0,-9.03,-178.1	0/0:-0,-10.84,-216	0/0:-0,-3.61,-72
chr2	23746254	G	<INS:ME:Bov-A2>	PASS	TSD=null;ASSESS=4;INTERNAL=XM_015474949.2,INTRONIC;SVTYPE=Bov-A2;SVLEN=267;MEINFO=Bov-A2,1,268,-;DIFF=0.48:c9a,c17a,c18t,g66a,g73a,t81c,g82a,c87t,t90a,a160g,n166-269;LP=7;RP=6;RA=0.222;PRIOR=false;SR=12	0/0:-0,-15.05,-297.4	0/0:-0,-12.04,-236.2	0/0:-0,-18.66,-369.6	0/0:-0,-7.83,-150	0/0:-0,-12.64,-240.1	0/0:-1.04,-10.84,-192.5	0/0:-1.81,-15.65,-277.81	0/0:-0.44,-6.02,-105.1	0/0:-0,-12.64,-250.8	0/0:-0,-6.62,-128.7	0/0:-0,-15.65,-310.9	0/0:-0,-7.22,-136.2	0/0:-0,-13.25,-259.2	0/0:-0.05,-13.25,-256	0/0:-0,-6.62,-129.9	0/0:-0,-4.82,-94	0/0:-0,-4.21,-82	0/0:-0,-6.02,-120	0/0:-0.6,-16.86,-322.1	0/0:-0,-6.62,-132	0/0:-0,-16.26,-324	0/0:-0,-4.21,-84	0/0:-0,-9.03,-178	0/0:-0,-9.63,-181.4	0/0:-0,-7.22,-142.2	0/0:-0.66,-12.04,-211.4	0/0:-0,-9.03,-175.9	0/0:-0,-10.84,-207.3	0/0:-0,-15.05,-294.6	0/0:-0,-16.86,-335.3	0/1:-41.2,-11.44,-175.2	0/0:-0,-13.25,-256.1	0/0:-0,-11.44,-228	0/0:-0,-11.44,-227.5	0/0:-0,-10.24,-204	0/0:-0,-6.62,-130	0/0:-0,-9.03,-173.1	0/0:-0,-13.85,-276
chr2	30736322	T	<INS:ME:Bov-A2>	PASS	TSD=null;ASSESS=3;INTERNAL=XM_005202483.4,INTRONIC;SVTYPE=Bov-A2;SVLEN=256;MEINFO=Bov-A2,12,268,+;DIFF=0.95:n1-11,g14a,c37t,c54t,c63t,t64g,a91g,c103t,c111t,c125t,c197t,a223c,g231a,c240t,c255t;LP=34;RP=9;RA=1.918;PRIOR=false;SR=33	0/0:-0,-10.84,-210	0/0:-0,-8.43,-168	0/1:-53.5,-13.25,-200.4	0/0:-0,-6.62,-130.6	0/0:-0,-13.25,-258	0/0:-0.01,-16.26,-317.8	0/0:-0,-13.25,-258	0/0:-0,-13.25,-260	0/0:-0,-18.66,-369.8	0/0:-0,-9.63,-190.9	0/0:-0.03,-15.05,-288.1	0/1:-57.4,-10.84,-141.8	0/0:-0,-13.85,-269.6	0/1:-60.73,-9.63,-110.4	0/0:-0.05,-8.43,-163	0/1:-22,-5.42,-84	0/0:-0,-9.63,-189.5	0/0:-0.6,-3.61,-60.6	0/0:-0,-16.26,-321.7	0/0:-0,-6.02,-116	0/0:-0,-13.85,-274	0/0:-0,-4.82,-94	0/0:-0,-3.61,-70	0/0:-0,-10.84,-215.3	1/1:-102.7,-7.22,-1.2	0/0:-0,-12.04,-232.8	0/0:-0.03,-9.03,-168	0/0:-0,-15.65,-310	0/1:-88.5,-10.24,-103.9	0/0:-0,-13.25,-262	0/1:-68,-7.83,-84	0/0:-0,-10.24,-198	0/0:-0,-10.84,-210.5	0/0:-0,-11.44,-226	0/1:-46,-6.62,-84	0/0:-0,-8.43,-168	0/0:-0,-10.24,-204	0/0:-1.2,-8.43,-143.4
chr2	32003381	T	<INS:ME:Bov-A2>	PASS	TSD=TTTATCAT;ASSESS=5;INTERNAL=null,null;SVTYPE=Bov-A2;SVLEN=264;MEINFO=Bov-A2,4,268,-;DIFF=0.46:n1-3,t67a,g73a,a80g,g88c,a91g,a94g,g95a,n129-269;LP=10;RP=3;RA=1.737;PRIOR=false;SR=4	0/0:-0,-9.63,-192	0/0:-0,-12.04,-240	0/0:-0,-12.04,-238	0/0:-0,-5.42,-108	0/0:-0,-13.25,-264	0/0:-0,-11.44,-228	0/0:-0,-10.84,-216	0/0:-0,-9.63,-192	0/0:-0,-18.66,-370.9	0/0:-0,-7.83,-156	0/0:-0,-10.84,-214	0/0:-0,-8.43,-168	0/0:-0,-13.25,-264	0/0:-0,-10.24,-202	0/0:-0,-7.22,-144	0/0:-0,-4.82,-96	0/0:-0,-6.02,-120	0/0:-0,-9.63,-192	0/0:-0,-13.25,-264	0/1:-76,-9.63,-108	0/0:-0,-10.84,-216	0/0:-0,-5.42,-108	0/0:-0,-4.82,-96	0/0:-0,-8.43,-168	0/0:-0,-7.22,-144	0/0:-0,-6.02,-120	0/0:-0,-12.64,-252	0/0:-0,-12.04,-240	0/0:-0,-13.85,-270.3	0/0:-0,-11.44,-228	0/0:-0,-9.03,-178	0/0:-0.6,-22.28,-432.6	0/0:-0,-6.62,-132	0/0:-0,-10.24,-204	0/0:-0,-10.24,-204	0/1:-74,-9.03,-96	0/1:-42,-8.43,-120	0/0:-0,-3.61,-72
chr2	33538417	T	<INS:ME:Bov-A2>	PASS	TSD=TTCCTTGAGAATTCTT;ASSESS=5;INTERNAL=null,null;SVTYPE=Bov-A2;SVLEN=267;MEINFO=Bov-A2,1,268,-;DIFF=0.74:c47a,c54t,c87t,g88a,c97t,g98a,c103t,n117,n122,n127-128,g211a,g219a,g225a,g228a,n240-269;LP=6;RP=7;RA=-0.222;PRIOR=false;SR=14	0/0:-0,-12.04,-238.8	0/0:-0,-8.43,-162	0/0:-0,-15.65,-312	0/0:-0,-1.81,-36	0/0:-0,-9.03,-180	0/0:-0,-10.84,-214.8	0/1:-23.9,-6.62,-108	0/0:-0,-18.06,-359.4	0/0:-0,-14.45,-286.8	0/1:-68.02,-7.22,-58.6	0/0:-0,-15.05,-300	0/0:-0,-8.43,-166	0/0:-0,-14.45,-284	0/0:-0,-9.03,-180	0/0:-0,-10.24,-202	0/0:-0,-7.83,-154	0/0:-0,-10.24,-204	0/0:-0,-2.41,-48	0/0:-0.13,-16.26,-318.6	0/0:-0,-10.84,-216	0/0:-0,-12.04,-240	0/0:-0,-4.82,-92.4	0/0:-0,-2.41,-48	0/0:-0,-8.43,-161.6	0/0:-0,-10.24,-198	0/0:-0,-11.44,-220	0/0:-0.6,-9.03,-168.6	0/1:-44.2,-9.03,-132	0/0:-0,-15.65,-312	0/0:-0,-10.84,-216	0/0:-0,-12.64,-252	0/0:-0.6,-11.44,-216.6	0/0:-0,-11.44,-227.3	0/0:-0,-6.02,-120	0/0:-0,-5.42,-108	0/0:-0,-7.83,-156	0/0:-0,-7.83,-156	0/0:-0,-7.22,-144
chr2	43171782	T	<INS:ME:Bov-A2>	PASS	TSD=null;ASSESS=3;INTERNAL=null,null;SVTYPE=Bov-A2;SVLEN=269;MEINFO=Bov-A2,0,269,-;DIFF=1:c48t,c54t,a91g,a94g,c97t,a100g,c111t,c190g,g198a,g200t,g204c,c218t,a223c,c258t;LP=72;RP=53;RA=0.442;PRIOR=false;SR=17	0/0:-0,-19.27,-384	0/0:-0,-10.24,-204	0/0:-0,-9.63,-190.8	0/1:-146,-11.44,-58	0/1:-148,-12.64,-84	0/0:-0,-16.26,-324	0/0:-0,-10.84,-216	0/0:-0,-10.24,-204	0/0:-0,-11.44,-228	0/0:-0,-8.43,-168	0/0:-0,-12.04,-240	0/1:-112,-8.43,-34	0/0:-0,-21.07,-418	0/0:-0,-15.05,-300	0/0:-0,-9.63,-192	0/0:-0,-6.62,-132	0/0:-0,-9.63,-192	0/0:-0,-9.63,-192	0/0:-0,-15.65,-312	0/1:-114,-11.44,-94	0/0:-0,-12.04,-240	0/0:-0,-4.82,-96	0/0:-0,-6.62,-132	0/0:-0,-5.42,-106	0/0:-0,-9.63,-192	0/1:-104,-13.85,-152	0/0:-0,-14.45,-288	0/0:-0,-12.64,-252	0/0:-0,-13.85,-276	0/0:-0,-13.25,-264	0/1:-120,-16.26,-178	0/0:-0,-14.45,-288	0/0:-0,-11.44,-228	0/0:-0,-12.04,-240	0/0:-0,-17.46,-348	1/1:-131.2,-9.03,-1.2	0/1:-144,-14.45,-120	0/0:-0,-6.02,-120
chr2	43900510	T	<INS:ME:Bov-A2>	PASS	TSD=null;ASSESS=3;INTERNAL=null,null;SVTYPE=Bov-A2;SVLEN=266;MEINFO=Bov-A2,2,268,+;DIFF=0.65:n1,c9t,c54t,a68g,g88a,g98a,g112a,t122g,t142c,g182a,t188c,g198t,g200c,a203g,t222c,t229c,g231a,g238c,g254a,a261c;LP=11;RP=8;RA=0.459;PRIOR=false;SR=23	0/1:-106.5,-10.24,-93.1	0/0:-1.2,-10.24,-179.2	0/1:-72,-11.44,-152.5	0/1:-94.7,-10.24,-101.6	0/0:-0,-11.44,-211.6	0/0:-0,-11.44,-228	0/0:-1.2,-7.83,-133.2	0/0:-0,-6.62,-129.9	0/0:-1.2,-8.43,-144.2	0/0:-0,-4.82,-84.8	0/0:-0.6,-10.24,-191.9	0/0:-0,-11.44,-221.5	0/0:-0,-15.65,-306.1	0/1:-24,-6.62,-101	0/1:-60,-4.21,-22.7	0/0:-0.6,-5.42,-92.6	0/0:-0,-8.43,-163.6	0/0:-0,-9.03,-180	0/0:-0.01,-10.24,-196	0/0:-1.2,-12.64,-222.2	0/0:-0,-10.84,-215.7	0/0:-0,-1.81,-36	0/1:-65.4,-4.82,-24	0/0:-0.6,-10.84,-198.6	0/0:-0,-9.03,-177.3	0/0:-0,-8.43,-152.4	0/0:-0.6,-9.03,-164.1	0/0:-1.2,-9.63,-165.9	0/0:-0,-13.25,-255	0/0:-0,-14.45,-288	0/0:-1.2,-7.83,-126.4	0/1:-83.3,-8.43,-81.9	0/0:-0,-6.02,-113.5	0/0:-1.2,-11.44,-195	0/0:-0,-10.24,-204	0/0:-0,-9.63,-187.8	0/0:-1.2,-10.24,-180.2	0/1:-48,-4.21,-36
chr2	45485552	A	<INS:ME:Bov-A2>	PASS	TSD=GGA;ASSESS=5;INTERNAL=null,null;SVTYPE=Bov-A2;SVLEN=258;MEINFO=Bov-A2,10,268,-;DIFF=0.94:n1-9,c22t,g66a,a68g,c87t,t90a,g98a,c103t,t127c,c230t,a237t,c240t;LP=24;RP=15;RA=0.678;PRIOR=false;SR=8	0/0:-0,-4.21,-84	0/0:-0,-8.43,-166	0/1:-34,-12.04,-201.6	0/0:-0,-4.82,-94.8	0/1:-120,-10.24,-70.4	0/1:-96,-10.84,-102.2	0/0:-0,-15.05,-298.3	0/0:-1.2,-9.63,-169.2	0/1:-76,-14.45,-199.6	0/0:-0,-8.43,-168	0/0:-0,-13.25,-261	0/1:-116,-12.64,-112	0/0:-0,-15.65,-305.8	0/1:-44,-9.63,-144	0/0:-0,-10.24,-204	0/1:-154.6,-13.85,-98	0/0:-0.6,-7.83,-144.6	0/1:-130,-12.64,-108	0/0:-0,-17.46,-345.6	0/0:-0,-7.83,-156	0/1:-44,-10.24,-156	0/0:-0.6,-5.42,-94.6	0/1:-78,-10.24,-114.8	0/1:-92,-13.25,-154	0/1:-92,-12.04,-124.8	0/1:-74,-12.04,-148.5	0/0:-0,-6.02,-120	0/0:-0,-10.84,-216	0/1:-98.13,-13.85,-158.6	0/0:-0,-10.24,-204	0/0:-0.6,-11.44,-212.6	0/1:-122,-10.24,-70	0/1:-180,-14.45,-82	0/1:-32,-5.42,-70	0/1:-66,-9.63,-118	0/1:-78,-8.43,-84	0/0:-0,-8.43,-168	0/0:-0,-9.63,-192
chr2	75202060	T	<INS:ME:Bov-A2>	PASS	TSD=null;ASSESS=3;INTERNAL=null,null;SVTYPE=Bov-A2;SVLEN=259;MEINFO=Bov-A2,10,269,-;DIFF=0.96:n1-10,c54t,g104a,c197t,c218t;LP=27;RP=237;RA=-3.134;PRIOR=false;SR=71	0/1:-43.1,-10.24,-123.46	1/1:-49.9,-5.42,-0.9	0/0:-0,-12.04,-233.5	1/1:-48.9,-3.01,-0	0/0:-0.13,-17.46,-331.3	1/1:-79.4,-7.22,-1.21	1/1:-40.2,-4.21,-1.3	1/1:-81.7,-7.22,-0.67	0/1:-35.21,-9.63,-125.9	1/1:-34.9,-3.01,-0.08	0/1:-85.59,-8.43,-20.21	1/1:-13.7,-1.2,-0.01	0/0:-1.3,-1.81,-12.2	0/0:-1.2,-7.83,-133.2	1/1:-69.6,-6.02,-0.69	0/0:-0,-7.22,-141.2	1/1:-74.6,-5.42,-0.01	1/1:-68.3,-5.42,-0.01	1/1:-26.7,-3.01,-0.66	0/1:-51.6,-5.42,-18.71	0/1:-72.16,-12.04,-125.41	1/1:-33.1,-3.01,-0.61	1/1:-49.3,-4.21,-0.6	0/0:-1.2,-7.22,-115.7	0/0:-0.7,-5.42,-87.5	1/1:-35.9,-3.01,-0.2	1/1:-58.9,-5.42,-0.62	1/1:-39.5,-4.21,-0.8	0/0:-0,-12.04,-238.4	1/1:-82.5,-7.83,-0.69	0/0:-1.26,-7.83,-111.7	1/1:-55.3,-5.42,-0.64	0/1:-48.72,-5.42,-11.33	0/1:-21.36,-9.63,-150.1	1/1:-75.6,-7.83,-1.29	0/1:-27.1,-3.61,-17.91	1/1:-60.8,-6.02,-0.61	0/1:-62.1,-6.02,-14.3
chr2	80328118	T	<INS:ME:Bov-A2>	PASS	TSD=TTATGTTTT;ASSESS=5;INTERNAL=null,null;SVTYPE=Bov-A2;SVLEN=266;MEINFO=Bov-A2,2,268,+;DIFF=0.32:n1,n4,c20t,c54t,g55a,g84a,c97t,g98a,c101t,c103t,n131,n173,n180-269;LP=1;RP=5;RA=-2.322;PRIOR=false;SR=4	0/0:-0,-10.24,-201.9	0/0:-0,-8.43,-163.6	0/0:-0,-6.62,-132	0/1:-60,-6.62,-72	0/0:-0,-7.22,-144	0/0:-0,-12.64,-252	0/0:-0.6,-4.82,-84.6	0/1:-59.1,-4.21,-24	0/0:-0.6,-2.41,-36.6	0/0:-0.6,-6.62,-117.2	0/0:-0.6,-7.22,-131.5	0/0:-0.6,-1.81,-24.6	0/1:-48,-4.21,-36	0/0:-0.6,-15.05,-288.6	0/0:-0.6,-5.42,-93.1	0/1:-24,-4.21,-60	1/1:-36.6,-2.41,-0.6	0/0:-0,-8.43,-166	0/0:-0,-15.65,-308.9	0/0:-0,-6.62,-132	0/0:-1.2,-9.63,-165.2	0/0:-0,-7.22,-144	0/0:-0,-4.21,-84	0/1:-48,-3.61,-20	0/0:-0.6,-6.02,-108.6	0/0:-0.6,-5.42,-96.6	0/0:-0,-11.44,-225.4	0/0:-0,-11.44,-228	0/0:-0,-8.43,-168	0/0:-0.6,-9.03,-168.6	0/1:-58,-4.21,-24	0/0:-0,-12.64,-252	0/0:-0,-5.42,-107.2	0/0:-0,-11.44,-221.6	0/0:-1.2,-10.24,-181.2	0/1:-36,-3.61,-33.1	0/0:-0,-7.83,-156	0/0:-0.6,-6.62,-117.8
chr2	83690730	A	<INS:ME:Bov-A2>	PASS	TSD=null;ASSESS=3;INTERNAL=null,null;SVTYPE=Bov-A2;SVLEN=267;MEINFO=Bov-A2,1,268,-;DIFF=0.48:g8a,g55a,n76-100,g104a,g112a,a124t,n139-140,a223c,g231a,c240a,g242t;LP=3;RP=8;RA=-1.415;PRIOR=false;SR=18	0/0:-1.2,-10.24,-181.2	0/0:-0.6,-4.82,-84.6	0/0:-2.41,-20.47,-355.41	0/0:-0.6,-1.81,-24.6	0/0:-1.2,-10.84,-191.2	0/0:-1.2,-9.63,-167.2	0/0:-0.6,-9.03,-168.6	0/0:-1.2,-15.05,-274.8	0/0:-1.81,-15.05,-265.81	0/1:-36,-8.43,-131.7	0/1:-58.4,-15.65,-251	0/1:-48,-12.04,-192	0/0:-1.2,-11.44,-205.2	0/0:-0.6,-16.26,-312.6	0/0:-0.6,-7.83,-142.6	0/0:-0.6,-6.62,-120.6	0/0:-0.6,-9.03,-168.6	0/1:-24,-4.82,-72	0/1:-48,-10.84,-168	0/1:-36,-6.02,-82.7	0/1:-48,-12.64,-202	0/0:-0,-2.41,-43	0/0:-0,-2.41,-48	0/0:-0,-6.62,-132	0/0:-0,-4.82,-96	0/0:-1.2,-10.84,-185.3	0/0:-1.93,-15.05,-260.11	0/1:-24,-6.62,-108	0/0:-1.2,-10.84,-191.2	0/1:-48,-12.64,-204	0/1:-48,-10.24,-156	0/0:-1.2,-10.84,-193.2	0/0:-1.2,-8.43,-143.2	0/0:-0.6,-9.63,-177.9	0/0:-0,-1.2,-24	0/0:-0,-4.82,-96	0/0:-1.2,-9.03,-157.2	0/0:-0,-7.83,-156
chr2	84210455	T	<INS:ME:Bov-A2>	PASS	TSD=null;ASSESS=4;INTERNAL=XM_005202632.4,PROMOTER;SVTYPE=Bov-A2;SVLEN=250;MEINFO=Bov-A2,18,268,+;DIFF=0.37:n1-17,g55a,c87t,t90a,a91c,g104a,i109a,n117-218,t222c,c230t,g247a;LP=39;RP=34;RA=0.198;PRIOR=false;SR=4	0/0:-0,-13.85,-276	0/0:-0,-7.83,-156	0/0:-0,-11.44,-228	0/1:-56,-6.02,-60	0/0:-0.6,-14.45,-276.4	0/0:-0.6,-16.26,-308	0/0:-1.2,-13.25,-239.9	0/0:-0.6,-12.04,-228.6	0/0:-0,-13.85,-276	0/0:-0,-9.63,-192	0/0:-0,-16.86,-334	0/0:-1.2,-10.24,-181.2	0/0:-0,-13.85,-276	0/0:-0,-10.84,-216	0/0:-0,-14.45,-288	0/0:-0,-7.22,-144	0/1:-110,-12.04,-120	0/0:-0,-9.03,-180	0/0:-0,-15.05,-300	0/0:-0,-9.03,-180	0/0:-0,-14.45,-288	0/1:-30,-6.02,-84	0/0:-0,-9.03,-180	0/0:-0.6,-16.26,-306.3	0/0:-0,-4.82,-96	0/1:-54,-7.22,-84	0/0:-0.13,-14.45,-282.6	0/0:-0,-13.85,-276	0/0:-0,-17.46,-348	0/0:-0,-11.44,-228	0/1:-54,-10.84,-156	0/0:-0,-8.43,-168	0/1:-52,-9.03,-120	0/0:-0,-15.05,-300	0/0:-0,-9.63,-192	0/0:-0,-6.02,-120	0/1:-60.7,-6.62,-60.1	0/0:-0,-8.43,-168
chr2	92835538	T	<INS:ME:Bov-A2>	PASS	TSD=null;ASSESS=4;INTERNAL=XM_002685527.4,INTRONIC;SVTYPE=Bov-A2;SVLEN=269;MEINFO=Bov-A2,0,269,+;DIFF=0.99:c15t,c18t,g85a,g88a,t90g,g112a,t142c,a148c,g151a,c197t,g219a,c240t,n267-269;LP=33;RP=6;RA=2.459;PRIOR=false;SR=9	0/0:-0,-15.05,-300	0/0:-0,-10.24,-204	0/0:-0,-13.85,-276	0/0:-0,-10.24,-204	0/1:-70,-12.04,-156	0/0:-0,-13.25,-264	0/0:-0,-13.25,-264	0/1:-64,-8.43,-96	0/0:-0,-16.26,-324	0/0:-0,-12.64,-252	0/0:-0,-12.04,-240	0/1:-88,-10.84,-115.9	0/0:-0,-16.86,-334	0/0:-0,-13.85,-276	0/0:-0,-10.24,-204	0/0:-0,-7.22,-144	0/0:-0,-6.62,-132	0/0:-0,-6.62,-132	0/0:-0,-10.84,-216	0/1:-74,-10.24,-120	0/0:-0,-16.26,-324	0/0:-0,-1.2,-24	0/1:-40,-4.21,-36	0/1:-60.1,-9.63,-120.69	0/0:-0,-6.62,-132	0/1:-86,-9.03,-84	0/0:-0,-13.25,-264	0/0:-0,-10.84,-216	0/0:-0,-13.25,-264	0/0:-0,-10.84,-216	0/0:-0,-6.02,-120	0/0:-0,-12.04,-240	0/0:-0,-16.86,-336	0/0:-0,-16.26,-324	0/0:-0,-8.43,-168	0/0:-0,-12.64,-249	0/0:-0,-6.02,-120	0/0:-0,-10.84,-216
chr2	96830812	A	<INS:ME:Bov-A2>	PASS	TSD=AAAAAAAA;ASSESS=5;INTERNAL=null,null;SVTYPE=Bov-A2;SVLEN=254;MEINFO=Bov-A2,14,268,+;DIFF=0.54:n1-13,c30g,a42g,g70a,g98a,n115-118,a124t,t138c,c140a,n141,c179t,g185a,c197t,g216t,a223c,g231a,g238a,n269;LP=1;RP=6;RA=-2.585;PRIOR=false;SR=7	0/0:-0,-9.03,-180	0/0:-0,-4.21,-84	0/0:-0.01,-13.25,-258.6	0/0:-0,-1.81,-36	0/0:-0,-12.64,-251.1	0/0:-0,-10.84,-216	0/0:-0,-15.65,-311.2	0/0:-0,-11.44,-228	0/0:-0,-18.66,-372	0/0:-0,-11.44,-226	0/1:-58.8,-18.66,-306.5	0/0:-0,-11.44,-226	0/0:-0,-10.84,-212	0/0:-0.6,-13.25,-252.3	0/0:-0,-11.44,-221.8	0/1:-22,-6.02,-95.9	0/0:-0,-9.03,-180	0/0:-0,-3.01,-60	0/0:-1.81,-13.85,-241.81	0/0:-0,-7.83,-156	0/0:-0,-13.25,-264	0/0:-0,-1.81,-36	0/0:-0,-3.01,-60	0/0:-0,-9.03,-176	0/0:-0,-9.63,-190	0/1:-72,-10.84,-143.3	0/0:-0,-13.25,-264	0/0:-0,-12.04,-240	0/0:-0,-14.45,-288	0/0:-0,-12.04,-240	0/0:-0,-9.03,-180	0/0:-1.2,-12.64,-229.1	0/0:-0.6,-15.65,-300.4	0/1:-48,-11.44,-180	0/0:-0,-8.43,-168	0/0:-0,-9.03,-180	0/0:-0,-6.62,-132	0/0:-0,-6.02,-120
chr2	99873626	C	<INS:ME:Bov-A2>	PASS	TSD=null;ASSESS=3;INTERNAL=XM_010802290.3,INTRONIC;SVTYPE=Bov-A2;SVLEN=267;MEINFO=Bov-A2,2,269,-;DIFF=0.99:a6g,a11g,a42g,a49g,i51ggacataatctgc,g55a,a91g,a94g,c101t,n103,i106c,a109g,c111a,a131c,c165t,a196g,g198a,a203t,g219t,a223c,d232,g241a,c255t,c266t,n269;LP=19;RP=34;RA=-0.84;PRIOR=false;SR=11	0/0:-0,-16.86,-336	0/0:-0,-3.61,-72	0/0:-0,-12.04,-240	0/1:-61.3,-4.82,-24	0/0:-0,-15.05,-300	0/0:-0,-17.46,-348	0/0:-0,-21.67,-428	0/0:-0,-22.28,-444	0/0:-0,-13.25,-264	0/0:-0,-1.81,-36	0/0:-0.01,-18.06,-355.8	0/1:-44,-7.22,-96	0/0:-0,-13.25,-264	0/0:-0,-10.24,-204	0/0:-0,-10.24,-204	0/0:-0,-7.83,-156	1/1:-116,-6.62,-0	0/0:-0,-3.61,-72	0/0:-0.6,-16.86,-324.6	0/0:-0,-9.63,-192	0/0:-0,-13.85,-276	0/0:-0,-4.21,-84	0/0:-0,-3.01,-60	1/1:-103.2,-7.22,-1.2	0/0:-0,-8.43,-168	0/0:-0,-6.62,-132	0/0:-0,-10.84,-216	0/0:-0,-13.85,-276	0/0:-0.6,-13.25,-252.6	0/0:-0,-15.65,-312	0/0:-0,-9.63,-192	0/0:-0,-19.87,-396	0/0:-0.01,-12.04,-235.8	0/0:-0,-13.85,-276	0/0:-0,-7.22,-144	0/0:-0,-4.21,-84	1/1:-125.2,-8.43,-1.2	0/0:-0,-9.63,-192
chr2	104135259	G	<INS:ME:Bov-A2>	PASS	TSD=null;ASSESS=3;INTERNAL=XM_024975584.1,INTRONIC;SVTYPE=Bov-A2;SVLEN=267;MEINFO=Bov-A2,1,268,+;DIFF=0:t23g,a42g,c54t,c87t,a92g,a100g,c103t,a113g,t115a,n118,n121,n126-127,n149-190,c214t,g219a,t220c,n232-233,n247,c255t;LP=1;RP=4;RA=-2;PRIOR=false;SR=8	0/1:-72,-12.64,-178.8	0/0:-0,-7.83,-154	0/0:-0,-6.62,-130	0/0:-0,-11.44,-226.8	0/0:-0.6,-11.44,-216.6	0/0:-0,-11.44,-228	0/1:-58,-10.84,-156	0/0:-0,-15.65,-311.6	0/0:-0,-17.46,-347.5	0/1:-115.07,-10.24,-78.8	0/1:-118.4,-16.86,-215.4	0/1:-69.2,-9.63,-120	0/0:-0.6,-14.45,-272.5	0/0:-1.2,-11.44,-203.2	0/1:-108,-7.83,-46	0/1:-35.1,-4.82,-58	0/1:-96,-11.44,-131.5	0/0:-0,-9.03,-180	0/1:-60,-13.85,-216	0/0:-0,-12.04,-240	0/0:-0.6,-10.84,-204.6	0/0:-0.6,-3.01,-48.6	0/0:-1.2,-12.64,-229.2	0/1:-102.7,-10.84,-108	0/0:-0,-13.25,-264	0/0:-0.6,-8.43,-154.7	0/1:-132,-13.25,-130.4	0/1:-58.5,-10.24,-142	0/1:-130.7,-13.85,-143	0/1:-118.4,-12.04,-117	0/0:-0,-9.63,-192	0/1:-70.4,-11.44,-152.4	0/0:-1.2,-12.04,-217.2	0/0:-0,-12.04,-239.5	0/0:-0,-11.44,-228	0/0:-0.6,-8.43,-156.3	0/0:-0,-9.03,-180	0/1:-60,-11.44,-168
chr2	112853877	C	<INS:ME:Bov-A2>	PASS	TSD=CCAGGC;ASSESS=5;INTERNAL=XM_005202985.4,TERMINATOR;SVTYPE=Bov-A2;SVLEN=265;MEINFO=Bov-A2,3,268,-;DIFF=0.83:n1-2,c9a,c17a,a42g,c54a,g73a,c79t,t90a,c111t,n128-145,g172a,t173c,g193t,c197a,g200a,g211a,g216a,c218a,c234a,n251-269;LP=20;RP=27;RA=-0.433;PRIOR=false;SR=57	0/1:-46.13,-13.85,-216.4	0/1:-30,-7.22,-108	0/0:-0,-15.05,-300	0/1:-56.01,-8.43,-95.6	0/1:-58.05,-10.84,-124.6	0/0:-1.2,-10.84,-193.2	0/1:-96.01,-16.86,-222.2	0/0:-0,-10.24,-204	0/1:-108.04,-13.85,-152	0/0:-1.2,-7.22,-121.2	0/1:-55.83,-19.87,-321.3	0/1:-20,-4.82,-72	0/0:-1.81,-19.87,-358.81	0/0:-0,-13.25,-263.8	0/1:-86,-7.83,-60	0/1:-50,-4.82,-36	0/1:-59.08,-11.44,-139.4	0/0:-0.63,-4.21,-67.8	0/0:-1.2,-14.45,-258.2	0/1:-78.41,-7.83,-60.6	0/0:-0,-17.46,-348	0/0:-0.6,-2.41,-34.6	0/0:-0.61,-3.61,-51.4	0/1:-104.6,-7.83,-36	0/1:-91.6,-13.85,-168	0/1:-231.3,-18.06,-84.18	0/0:-0,-6.62,-132	0/1:-56.82,-7.83,-74.4	0/1:-78.7,-11.44,-140	0/1:-95.63,-13.25,-156.2	0/1:-196.9,-15.65,-84.01	0/0:-0,-7.22,-144	0/1:-76.2,-13.85,-192	0/1:-159.43,-18.66,-181.02	0/1:-162.04,-15.65,-120.4	0/1:-42.51,-6.02,-61.4	0/1:-91.51,-8.43,-60.41	0/0:-1.23,-7.83,-126.4
chr2	113353870	T	<INS:ME:Bov-A2>	PASS	TSD=dC;ASSESS=5;INTERNAL=null,null;SVTYPE=Bov-A2;SVLEN=258;MEINFO=Bov-A2,10,268,+;DIFF=0.97:n1-9,c54t,g65a,g66a,d98,g99a,c101g,c111t,c230a,c246t,c255t;LP=146;RP=163;RA=-0.159;PRIOR=false;SR=41	0/0:-0,-13.25,-264	0/1:-144,-12.64,-84	0/0:-0.01,-16.86,-331.2	0/1:-152,-13.85,-100	0/1:-76,-11.44,-138	0/0:-0,-12.04,-240	0/1:-100,-11.44,-106	0/1:-132,-16.26,-166	0/1:-167.9,-20.47,-212	0/0:-0,-5.42,-108	0/0:-0,-12.64,-252	0/1:-82,-6.62,-34	0/0:-0,-8.43,-168	0/0:-0,-18.06,-360	0/0:-0,-7.83,-156	0/0:-0.6,-10.84,-204.6	0/1:-252,-16.86,-42	0/0:-0,-7.22,-144	0/1:-102,-12.04,-120	0/0:-0,-3.61,-72	0/1:-106,-10.84,-96	0/0:-0,-5.42,-108	0/0:-0,-8.43,-166.6	0/0:-0,-12.04,-238.3	0/1:-177.3,-18.66,-164	0/1:-170,-15.65,-106	0/1:-209.9,-18.66,-132	1/1:-256,-15.05,-0	0/1:-96,-10.84,-108	0/1:-184,-20.47,-188	0/1:-83.7,-6.02,-24	0/1:-132,-13.25,-104	0/1:-82,-13.85,-176	0/0:-0,-13.85,-276	1/1:-192,-11.44,-0	1/1:-136.6,-8.43,-0.6	1/1:-253.2,-15.65,-1.2	0/0:-0,-8.43,-168
chr2	116423989	T	<INS:ME:Bov-A2>	PASS	TSD=null;ASSESS=4;INTERNAL=null,null;SVTYPE=Bov-A2;SVLEN=269;MEINFO=Bov-A2,0,269,+;DIFF=0.97:a10g,g39a,c54a,t81c,g83a,c87t,t90g,g108a,g112a,c179t,c197t,g219a,g226a,g227a,c240t,g251a,c255t,n269;LP=122;RP=129;RA=-0.08;PRIOR=false;SR=27	0/1:-118.8,-13.25,-120	0/0:-0,-3.61,-72	0/1:-156,-18.66,-192	0/0:-0,-6.02,-120	0/0:-0,-15.65,-312	0/0:-0,-13.25,-264	1/1:-290.51,-18.66,-1.81	0/0:-0,-16.86,-336	0/1:-102.13,-10.84,-90.6	0/1:-84,-9.03,-84	0/0:-0,-10.84,-216	0/1:-107.9,-10.84,-84	0/1:-166,-24.08,-288	0/0:-0,-14.45,-288	1/1:-183.8,-12.04,-1.2	0/0:-0,-4.21,-84	0/0:-0,-9.63,-192	0/1:-114,-8.43,-36	0/0:-0,-15.65,-310.3	0/1:-140,-14.45,-120	1/1:-265.6,-16.86,-1.21	0/1:-82,-7.22,-48	0/0:-0,-6.02,-118	0/0:-0,-10.84,-216	0/1:-141.7,-13.25,-96	0/1:-97,-10.84,-93.7	0/1:-74,-12.64,-168	0/0:-0,-9.03,-180	0/0:-0,-18.06,-358	0/0:-0,-13.85,-276	0/0:-0,-9.63,-192	0/1:-186,-17.46,-132	0/1:-154,-16.26,-138.1	0/0:-0,-9.03,-175.5	0/0:-0,-7.22,-144	0/1:-90,-10.84,-108	0/0:-0,-10.24,-204	0/0:-0,-14.45,-288
chr3	415574	A	<INS:ME:Bov-A2>	PASS	TSD=AAAAAAAAA;ASSESS=5;INTERNAL=NM_001079615.2,INTRONIC;SVTYPE=Bov-A2;SVLEN=267;MEINFO=Bov-A2,1,268,+;DIFF=0:n1-144,a152c,t171c,c205g,g231a,g241a,n253-269;LP=1;RP=3;RA=-1.585;PRIOR=false;SR=6	0/0:-1.2,-11.44,-202.5	0/0:-0,-7.83,-155.7	0/0:-0.6,-10.84,-201	0/0:-0,-4.82,-96	0/0:-0.73,-8.43,-150.7	0/1:-120,-12.04,-120	0/0:-1.2,-10.84,-193.2	0/1:-48,-18.06,-308.8	0/1:-60,-16.26,-264	0/0:-0,-7.22,-142.1	0/0:-1.81,-16.26,-289.81	0/0:-0,-5.42,-105	0/0:-0.6,-15.65,-298.6	0/1:-67.2,-12.64,-180.03	0/0:-0,-10.84,-214.7	0/0:-0,-4.82,-94	0/0:-0,-9.03,-180	0/0:-0,-6.62,-132	0/1:-34.5,-10.84,-179.3	0/0:-0.6,-11.44,-216.6	0/0:-1.2,-10.84,-193.2	0/0:-0,-3.01,-60	0/0:-0,-5.42,-108	0/0:-0,-10.24,-198.9	0/0:-0.6,-6.62,-120.6	0/1:-46,-9.63,-144	0/1:-60,-7.83,-96	0/0:-0.6,-3.61,-60.6	0/1:-96,-15.65,-214	0/1:-58.2,-12.04,-180	0/0:-0,-15.05,-298	0/1:-96,-12.04,-144	0/1:-48,-11.44,-176.2	0/0:-0.6,-13.85,-264.6	0/1:-24,-6.62,-108	0/0:-0,-4.82,-96	0/0:-0,-6.02,-120	0/0:-0,-4.82,-96
chr3	6831387	G	<INS:ME:Bov-A2>	PASS	TSD=CCTTATTTTAAG;ASSESS=5;INTERNAL=NM_001083720.2,INTRONIC;SVTYPE=Bov-A2;SVLEN=267;MEINFO=Bov-A2,1,268,+;DIFF=0.9:n17,g39a,c46a,c54a,g55a,t67a,g70c,g83c,t86a,c87t,t96a,c97t,c111t,t122a,g145t,t155c,g226a,n231,c240t,g247a,g251a,g254a,c255t,n264-269;LP=6;RP=8;RA=-0.415;PRIOR=false;SR=7	0/1:-57.6,-16.26,-262.5	0/0:-1.2,-8.43,-145.2	0/0:-0,-19.27,-377.1	0/0:-0,-3.01,-60	0/0:-1.2,-16.86,-310.8	0/0:-0,-11.44,-228	0/0:-0,-19.27,-384	0/0:-0,-12.64,-252	0/0:-0.6,-15.05,-288.6	0/1:-83,-8.43,-84	0/0:-1.81,-14.45,-253.61	0/0:-0,-12.64,-252	0/1:-60.03,-12.64,-187.1	0/0:-0.6,-12.64,-239.5	0/0:-0.6,-9.63,-180.6	0/0:-0,-7.22,-144	0/0:-0,-13.85,-276	0/0:-0.6,-3.01,-48.6	0/0:-0,-8.43,-166	0/0:-0.6,-7.83,-144.6	0/0:-0,-18.66,-372	0/0:-0,-1.81,-36	0/0:-0,-3.01,-60	0/0:-0,-8.43,-166.5	0/1:-36,-7.22,-108	0/1:-60,-12.64,-192	0/1:-60,-16.86,-272.9	0/0:-0.6,-12.04,-228.6	0/0:-1.22,-16.86,-305.2	0/0:-0,-12.64,-252	0/0:-1.2,-10.24,-181.2	0/0:-0.6,-15.65,-296.4	0/0:-0,-12.04,-238	0/0:-0.6,-11.44,-214.6	0/0:-0.6,-4.21,-72.6	0/0:-0,-12.64,-250.5	0/0:-0,-7.83,-156	0/0:-0,-10.24,-204
chr3	7282353	T	<INS:ME:Bov-A2>	PASS	TSD=null;ASSESS=3;INTERNAL=NM_001146219.1,INTRONIC;SVTYPE=Bov-A2;SVLEN=269;MEINFO=Bov-A2,0,269,-;DIFF=0.55:n1,a11g,t45c,c46a,g55a,g59a,g65t,g76a,g112c,a124c,a152c,a160c,c162a,g172a,t173c,g216t,g219a,a223c,c230t,g256a,c266g;LP=9;RP=2;RA=2.17;PRIOR=false;SR=4	0/0:-0,-9.03,-180	0/0:-0,-6.62,-132	0/0:-0,-10.24,-202.7	0/1:-140,-12.04,-84	0/0:-0,-16.86,-336	0/0:-0,-11.44,-228	0/0:-0,-15.05,-300	0/0:-0.13,-12.64,-246.6	0/0:-0,-10.84,-212	0/0:-0,-6.02,-118.3	0/0:-0,-12.64,-252	0/0:-0,-6.02,-120	0/0:-0,-15.05,-296	0/0:-0,-13.85,-276	0/0:-0,-6.62,-132	0/0:-0,-5.42,-108	0/0:-0,-7.83,-154	0/0:-0,-11.44,-228	0/0:-0,-14.45,-288	0/0:-0,-7.83,-156	0/0:-0,-7.83,-156	0/0:-0,-4.82,-96	0/0:-0,-12.64,-252	0/0:-0,-13.25,-258	0/0:-0,-12.04,-240	0/0:-0,-12.04,-240	0/0:-0,-9.03,-179.3	0/0:-0,-9.63,-192	0/0:-0,-13.85,-276	0/0:-0,-10.84,-214	0/0:-0,-9.03,-180	0/0:-0,-9.63,-192	0/0:-0,-6.62,-132	0/0:-0,-6.62,-132	0/0:-0,-13.85,-276	0/0:-0.6,-13.85,-264.6	0/0:-0,-7.83,-156	0/0:-0,-9.03,-180
chr3	8624708	T	<INS:ME:Bov-A2>	PASS	TSD=CATGTACACATGTT;ASSESS=5;INTERNAL=NM_001101275.1,INTRONIC;SVTYPE=Bov-A2;SVLEN=267;MEINFO=Bov-A2,1,268,+;DIFF=0.99:c9t,a10g,c15t,g55a,c62g,g85c,t90a,g98a,g110t,a118c,g145a,a152g,c218t,c221t,g231t,c240t,g254a,c255t,t260c,n268-269;LP=149;RP=256;RA=-0.781;PRIOR=false;SR=82	0/1:-79,-19.87,-277.1	0/1:-97.81,-16.26,-154.78	0/0:-0,-18.66,-359.8	1/1:-184.7,-13.25,-1.9	0/1:-131.8,-22.88,-259	0/0:-0,-12.04,-221.9	0/1:-84.21,-10.84,-91.79	0/1:-152.91,-19.87,-149.41	0/1:-179,-27.09,-286.06	0/1:-112.37,-17.46,-189.75	0/0:-0,-15.65,-306.3	0/0:-0,-18.66,-361.5	0/1:-142.76,-16.26,-111.81	0/0:-0,-12.64,-247	0/1:-90.49,-13.85,-122.99	0/1:-58.4,-5.42,-33.24	0/1:-82.1,-16.86,-180.36	0/1:-99,-12.64,-109.52	0/1:-247.1,-28.3,-210.97	0/1:-173.1,-18.66,-122.34	0/1:-214.21,-22.28,-105.78	0/1:-104.67,-9.63,-29.79	0/1:-55,-12.64,-168	0/0:-0,-14.45,-272.1	0/1:-46.6,-8.43,-103.4	0/1:-118.42,-12.64,-74.87	0/1:-226.87,-19.87,-86.42	0/0:-0,-15.65,-290.9	0/1:-44.9,-7.83,-93.9	0/1:-150.87,-25.29,-257.74	0/1:-38.5,-10.84,-143.63	0/1:-237.69,-33.72,-312.02	0/1:-168.36,-27.09,-265.73	0/1:-110.59,-16.26,-180	0/1:-86.6,-13.25,-131.51	0/1:-207.7,-15.65,-42.57	0/1:-179,-21.07,-154.55	0/1:-59.2,-7.22,-54.34
chr3	13347261	A	<INS:ME:Bov-A2>	PASS	TSD=null;ASSESS=4;INTERNAL=XM_024989915.1,TERMINATOR;SVTYPE=Bov-A2;SVLEN=267;MEINFO=Bov-A2,1,268,-;DIFF=0.99:a53g,c54t,g88a,g139c;LP=128;RP=133;RA=-0.055;PRIOR=false;SR=31	0/0:-0,-12.64,-252	0/0:-0,-10.84,-216	0/1:-115.1,-21.07,-273.61	0/1:-101.6,-11.44,-90.42	0/1:-48.1,-15.05,-240	0/0:-0,-9.63,-191.2	0/1:-119.4,-24.08,-312.03	0/1:-137.1,-22.88,-282	0/0:-0,-12.64,-252	0/1:-76.2,-17.46,-224.35	0/0:-0,-13.85,-276	0/1:-61.6,-13.85,-176.68	0/0:-0,-11.44,-225.7	0/1:-114.8,-19.27,-240.01	0/0:-0,-12.64,-252	0/1:-60,-11.44,-151.6	0/1:-141.5,-17.46,-166.22	0/0:-0.6,-7.22,-132.6	0/1:-115.8,-19.27,-240.31	0/1:-68.2,-10.84,-120.02	0/1:-73.8,-24.08,-384	0/0:-0,-6.02,-120	0/1:-55.1,-7.22,-72.02	0/1:-64.8,-16.26,-226.06	0/1:-146.1,-21.67,-218.53	0/1:-158.6,-23.48,-218.33	0/0:-0,-14.45,-288	0/1:-69.5,-16.26,-228.06	0/0:-0,-15.05,-299.4	0/0:-0,-8.43,-167.8	0/1:-69.1,-16.86,-224.58	0/0:-0,-14.45,-288	0/0:-0,-13.25,-264	0/1:-148.1,-19.87,-192.69	0/0:-0,-7.22,-144	0/0:-0,-7.22,-144	0/1:-142.3,-16.26,-140.7	0/0:-0,-7.22,-144
chr3	13493480	A	<INS:ME:Bov-A2>	PASS	TSD=null;ASSESS=3;INTERNAL=XM_024989920.1,PROMOTER;SVTYPE=Bov-A2;SVLEN=267;MEINFO=Bov-A2,1,268,-;DIFF=1:c17a,c63t,t67a,a100g,c103t,c111a,c125t,g170a,a192g,g219a,g247a,c249t,g256a;LP=120;RP=97;RA=0.307;PRIOR=false;SR=38	0/0:-0,-15.05,-297.7	0/0:-0,-7.83,-156	0/0:-1.81,-19.27,-338.61	0/0:-0.01,-3.01,-55	0/1:-62.8,-16.86,-250.02	0/0:-0,-12.04,-240	0/1:-63.7,-22.28,-352.62	0/0:-0,-15.05,-296	0/0:-0,-10.84,-216	0/1:-68.6,-20.47,-318.9	0/0:-0,-14.45,-288	0/1:-30,-13.25,-218.9	0/0:-0,-12.04,-240	0/0:-1.81,-15.65,-277.81	0/0:-0,-12.04,-240	0/1:-40,-12.04,-185.1	0/1:-114.4,-15.05,-164.6	0/0:-0,-6.62,-132	0/0:-0.6,-21.07,-402.7	0/0:-0.6,-13.25,-248.7	0/0:-0.6,-21.67,-416	0/0:-0,-2.41,-48	0/0:-0,-4.82,-94	0/1:-56.8,-20.47,-321.4	0/1:-74.7,-13.85,-182.8	0/1:-119.53,-21.07,-255.7	0/0:-0,-13.25,-264	0/1:-32,-10.24,-167.3	0/0:-0,-12.64,-250	0/0:-0,-11.44,-228	0/1:-90.2,-13.85,-165.4	0/0:-0,-9.63,-192	0/0:-0,-15.65,-312	0/1:-55.3,-17.46,-272.47	0/0:-0,-4.21,-84	0/0:-0,-10.24,-204	0/0:-0.6,-10.84,-204.1	0/0:-0,-3.61,-72
chr3	16202510	A	<INS:ME:Bov-A2>	PASS	TSD=0tsd;ASSESS=5;INTERNAL=NM_001191221.2,TERMINATOR;SVTYPE=Bov-A2;SVLEN=267;MEINFO=Bov-A2,1,268,-;DIFF=0.81:a16t,c17a,c30t,a42g,a68g,g73a,t81c,c87t,t90a,c111t,g151a,g198a,g219t,g231a,c240t,c246g,c255t,n261-269;LP=4;RP=17;RA=-2.087;PRIOR=false;SR=14	0/0:-0,-11.44,-228	0/1:-30.6,-12.64,-208	0/0:-0,-15.05,-298	0/1:-45.4,-7.22,-91.5	0/0:-0,-10.24,-204	0/0:-0,-14.45,-286	0/0:-0,-14.45,-288	0/0:-0,-14.45,-288	0/0:-0,-13.85,-276	0/0:-0,-9.03,-180	0/0:-0,-15.05,-300	0/1:-29.22,-7.22,-86.2	0/0:-0.6,-10.84,-204.6	0/0:-0,-13.85,-276	0/0:-0,-14.45,-286	0/0:-0,-5.42,-108	0/1:-68.4,-8.43,-90.6	0/0:-0,-10.24,-204	0/0:-0,-15.05,-298	0/0:-0.6,-10.84,-202.5	0/0:-0,-15.65,-312	0/0:-0,-5.42,-106	0/0:-0,-12.04,-240	0/1:-40.02,-9.63,-127.1	0/0:-0,-14.45,-288	0/0:-0,-13.85,-276	0/0:-0,-12.04,-239.7	0/0:-0.6,-10.84,-200.2	0/0:-0,-16.86,-336	0/0:-0,-16.26,-324	0/0:-0,-10.84,-216	0/0:-0,-16.26,-324	0/0:-0,-7.22,-144	0/0:-0.6,-13.85,-264.6	0/0:-0,-11.44,-228	0/0:-0,-9.03,-180	0/1:-51.2,-7.83,-91.5	0/0:-0,-15.05,-300
chr3	17631857	T	<INS:ME:Bov-A2>	PASS	TSD=TCACTCATTACT;ASSESS=5;INTERNAL=XR_003033876.1,PROMOTER;SVTYPE=Bov-A2;SVLEN=267;MEINFO=Bov-A2,1,268,+;DIFF=0.99:g7a,c54t,g59a,g93c,t96a,g98a,g110a,a137c,a148g,a153c,c218t,g228a,g236a,c246t,c255t;LP=9;RP=4;RA=1.17;PRIOR=false;SR=5	0/0:-0,-15.65,-310	0/0:-0.13,-10.84,-199.5	0/0:-0,-16.86,-333.1	0/0:-0,-4.82,-96	0/0:-0,-18.06,-360	0/0:-0,-18.66,-372	0/0:-0,-11.44,-223.8	0/0:-0,-12.64,-252	0/0:-0,-16.26,-321.3	0/0:-0,-9.63,-191	0/0:-0,-14.45,-288	0/1:-29,-5.42,-71.2	0/0:-0,-19.87,-393	0/0:-0,-10.84,-215.7	0/0:-0,-7.22,-142	0/0:-0,-8.43,-166.6	0/1:-13.51,-4.82,-65.9	0/0:-0,-6.02,-120	0/0:-0,-19.27,-382	0/0:-0,-6.62,-132	0/0:-0,-13.25,-262	0/0:-0,-4.21,-83	0/0:-0,-9.03,-180	0/1:-30.81,-3.61,-14.7	0/0:-0.1,-7.83,-148.7	0/0:-0,-15.05,-294.7	0/0:-0,-11.44,-228	0/0:-0,-13.25,-258.3	0/0:-0,-9.03,-179.1	0/0:-0,-14.45,-284.4	0/0:-0,-9.63,-181.8	0/0:-0,-18.06,-354	0/0:-0,-11.44,-228	0/0:-0,-14.45,-285.6	0/0:-0,-14.45,-288	0/0:-0,-9.63,-192	0/0:-0,-10.24,-200.2	0/0:-0,-8.43,-168
chr3	18591452	C	<INS:ME:Bov-A2>	PASS	TSD=null;ASSESS=3;INTERNAL=XM_010803075.3,TERMINATOR;SVTYPE=Bov-A2;SVLEN=267;MEINFO=Bov-A2,1,268,-;DIFF=0.8:c9t,a10g,c36g,g88a,g98a,c111a,c197t,g226t,n233-234,g241a,c255t,n265-269;LP=13;RP=28;RA=-1.107;PRIOR=false;SR=12	0/0:-0.7,-9.63,-167.8	0/0:-0.6,-6.62,-106.8	0/0:-0,-10.24,-189.8	0/0:-0,-5.42,-94.3	0/0:-1.36,-8.43,-126.6	0/0:-0,-6.02,-118	0/0:-0,-10.84,-214	0/0:-0,-9.63,-188.2	0/1:-43.9,-10.24,-148	0/0:-0.6,-8.43,-144.7	0/1:-33.7,-10.24,-158	0/0:-0,-6.62,-129.3	0/0:-0,-16.26,-293.2	0/0:-0,-11.44,-228	0/0:-0,-1.81,-33.5	0/0:-0,-4.21,-80	0/0:-0.01,-6.02,-102.1	0/0:-0,-13.85,-276	0/0:-0,-14.45,-286	0/0:-0,-9.63,-192	0/0:-0.6,-13.85,-261.4	0/0:-0.04,-1.81,-26.1	0/0:-0,-9.03,-177.7	0/0:-0.61,-6.62,-108.7	0/0:-0,-9.03,-166.9	0/1:-65.5,-9.03,-102	0/0:-0,-8.43,-163.4	0/0:-0,-10.24,-201.8	0/0:-0,-7.22,-142	0/0:-0,-7.22,-144	0/0:-1.21,-10.84,-173.7	0/0:-0,-8.43,-164.6	0/0:-0,-9.63,-192	0/0:-0,-8.43,-168	0/0:-0.6,-12.04,-218.4	0/0:-0,-4.82,-96	0/0:-1.04,-8.43,-147.5	0/0:-0,-9.63,-192
chr3	22711353	T	<INS:ME:Bov-A2>	PASS	TSD=GTTCTCAGTGT;ASSESS=5;INTERNAL=XR_003034203.1,PROMOTER;SVTYPE=Bov-A2;SVLEN=267;MEINFO=Bov-A2,1,268,+;DIFF=1:c17t,c19a,t31c,c54t,g88a,c97t,g98a,c103t,g112a,d115-120,a160g,c197t,g200c,g212c,g231a,c255t,t259c;LP=171;RP=133;RA=0.363;PRIOR=false;SR=144	0/0:-0.13,-9.63,-186.6	0/1:-244.4,-24.68,-190	0/0:-0,-16.26,-322	0/1:-354.3,-28.3,-156	0/0:-0,-12.04,-238.3	0/1:-140.5,-20.47,-240.01	0/0:-0,-12.64,-252	0/0:-0,-16.26,-324	0/0:-0,-9.63,-192	0/1:-88,-16.86,-222.4	0/1:-137.1,-21.67,-276	0/1:-201.6,-21.67,-178	0/0:-0,-18.66,-370	0/0:-0,-9.03,-180	0/1:-156.6,-18.06,-166	0/0:-0,-5.42,-108	0/1:-418.7,-33.72,-180	0/0:-0,-9.03,-180	0/0:-0,-14.45,-288	0/1:-134.5,-15.65,-156	0/1:-120.8,-15.05,-156	0/0:-0,-4.82,-96	0/0:-0,-9.03,-180	0/1:-526.6,-42.75,-189.21	0/1:-262.7,-25.89,-202	0/1:-157.6,-19.27,-192	0/0:-0,-7.83,-156	0/0:-0,-11.44,-228	0/0:-0,-14.45,-288	0/1:-129.3,-18.66,-228	0/0:-0,-12.04,-240	0/1:-199.4,-21.67,-200.7	0/1:-169.4,-17.46,-156	0/1:-256.9,-26.49,-228	0/0:-0.6,-15.05,-288.6	0/1:-94,-17.46,-240	0/0:-0,-7.83,-156	0/0:-0,-7.83,-156
chr3	22803670	G	<INS:ME:Bov-A2>	PASS	TSD=null;ASSESS=3;INTERNAL=XR_003033974.1,INTRONIC;SVTYPE=Bov-A2;SVLEN=258;MEINFO=Bov-A2,10,268,+;DIFF=0.62:n1-9,c17a,g39a,n45,d68,n75,t90a,g172a,t173c,g182a,g185a,g193t,g200a,n211-218,t222c,c234a,n244-269;LP=25;RP=42;RA=-0.748;PRIOR=false;SR=29	0/0:-0,-6.62,-130	0/1:-135.16,-22.28,-239.21	0/0:-0,-7.22,-140.3	0/0:-1.21,-16.26,-291.1	0/0:-0,-2.41,-48	0/0:-1.2,-12.04,-216.1	0/0:-0,-4.21,-82.7	0/0:-0,-7.22,-142.8	0/0:-0,-7.83,-155.8	0/1:-56.5,-10.24,-127.91	0/1:-27.8,-13.25,-226.7	0/1:-136.82,-12.64,-60.5	0/0:-0,-13.25,-257.4	0/0:-0,-5.42,-108	0/1:-74.9,-14.45,-174.52	0/0:-0,-3.61,-70	0/1:-64.7,-12.04,-140.16	0/0:-0,-10.24,-204	0/0:-0,-9.03,-174.8	0/0:-1.2,-10.24,-176.2	0/0:-0.6,-9.63,-174.6	0/0:-0,-4.21,-82.5	0/0:-0,-11.44,-228	0/1:-94.1,-14.45,-122.22	0/1:-99.8,-16.26,-174.16	0/1:-36.2,-11.44,-178.2	0/0:-0,-6.62,-126	0/0:-0,-9.03,-176.3	0/0:-0,-6.62,-132	0/0:-1.2,-7.22,-121.2	0/0:-0,-10.84,-212.7	0/0:-0,-9.63,-188.7	0/0:-0.6,-10.24,-190	0/1:-57.71,-9.03,-100.4	0/0:-0,-16.26,-321.2	0/1:-39.4,-7.22,-93.11	0/0:-0,-8.43,-168	0/0:-0,-7.22,-144
chr3	25744621	A	<INS:ME:Bov-A2>	PASS	TSD=TA;ASSESS=5;INTERNAL=XM_005204039.4,INTRONIC;SVTYPE=Bov-A2;SVLEN=267;MEINFO=Bov-A2,1,268,-;DIFF=0.38:c9a,c17a,c18t,t28g,c32a,c54t,g55a,g73a,g88a,t90a,g98a,n112-143,g147a,c197t,n210,g231a,n267-269;LP=1;RP=7;RA=-2.807;PRIOR=false;SR=8	0/0:-0,-17.46,-348	0/1:-41.2,-10.84,-145.23	0/0:-0,-19.87,-390.3	0/1:-44.7,-9.63,-130	0/0:-0,-17.46,-347.4	0/0:-0,-18.06,-358.4	0/0:-0,-15.65,-300.3	0/0:-0,-13.85,-275.2	0/0:-1.81,-15.05,-258.01	0/0:-0,-6.02,-118	0/0:-0,-13.25,-264	0/0:-0.6,-4.21,-66.6	0/0:-0,-16.86,-330.5	0/0:-0,-15.65,-309.9	0/0:-0,-7.22,-136.4	0/0:-0,-6.02,-115.5	0/1:-82.2,-10.24,-111.9	0/0:-0,-9.03,-180	0/0:-0,-20.47,-408	0/0:-0.13,-11.44,-220.6	0/0:-0,-18.66,-371.6	0/0:-0,-3.01,-57	0/0:-0,-5.42,-108	0/1:-95.9,-12.64,-117.69	0/0:-0,-7.83,-149	0/1:-67.8,-15.05,-200.83	0/0:-0,-13.85,-276	0/0:-0,-10.24,-204	0/0:-0,-7.83,-153.7	0/0:-0,-8.43,-168	0/1:-52.02,-9.63,-111.4	0/0:-0,-12.04,-240	0/0:-0,-14.45,-287.5	0/0:-0.6,-7.22,-132.6	0/0:-0,-8.43,-168	0/0:-0.6,-6.02,-106.6	0/1:-40.1,-5.42,-58	0/0:-0,-8.43,-166.6
chr3	26756186	T	<INS:ME:Bov-A2>	PASS	TSD=null;ASSESS=4;INTERNAL=XM_010803137.2,INTRONIC;SVTYPE=Bov-A2;SVLEN=265;MEINFO=Bov-A2,3,268,-;DIFF=0.2:n1-2,n5,c17a,g27a,c30t,c46t,n56,g59a,g85a,n87-88,t90a,g98a,g104a,a118g,t142c,g147t,g150a,n182-269;LP=2;RP=3;RA=-0.585;PRIOR=false;SR=4	0/0:-0,-7.22,-144	0/1:-22.5,-5.42,-82	0/0:-0,-15.05,-299.9	0/0:-0,-9.03,-180	0/0:-0,-12.64,-249.6	0/0:-0,-13.25,-259.7	0/0:-0,-10.84,-216	0/0:-0,-13.85,-276	0/0:-0,-14.45,-280.9	0/0:-0.6,-7.22,-126.5	0/0:-0,-13.25,-261	0/1:-31.5,-4.82,-58	0/0:-0.6,-15.05,-278.8	0/0:-0,-15.05,-300	0/0:-0.6,-8.43,-156.6	0/1:-36,-3.01,-24	0/0:-0,-10.24,-204	0/0:-0,-9.03,-180	0/0:-0,-15.65,-303.7	0/0:-0,-7.22,-144	0/0:-0,-15.65,-312	0/1:-41.8,-6.62,-84	0/0:-0,-10.24,-204	0/0:-0,-3.61,-67.3	0/1:-24,-6.62,-108	0/0:-1.21,-9.03,-146.6	0/0:-0,-11.44,-224.5	0/0:-0,-12.64,-252	0/0:-0,-13.85,-276	0/0:-0,-9.63,-192	0/0:-0.6,-10.24,-192.6	0/0:-0,-9.03,-180	0/0:-0,-13.85,-276	0/0:-0,-8.43,-168	0/0:-0,-10.24,-204	0/0:-0,-9.03,-180	0/0:-0,-6.62,-132	0/0:-0,-9.03,-180
chr3	28290501	C	<INS:ME:Bov-A2>	PASS	TSD=null;ASSESS=4;INTERNAL=NM_001034657.1,INTRONIC;SVTYPE=Bov-A2;SVLEN=247;MEINFO=Bov-A2,22,269,+;DIFF=1:c9a,c36t,c54t,a92g,c97t,c101t,a118c,t142c,c197t,g213a,c221t,a223c,g231a,c234g,c246t,c255t;LP=16;RP=17;RA=-0.087;PRIOR=false;SR=6	0/0:-0,-11.44,-226	0/0:-0,-8.43,-166	0/0:-0,-7.83,-156	0/1:-134.3,-15.65,-156	0/1:-120.41,-12.64,-103.8	0/0:-0.01,-9.63,-186.1	0/0:-0,-13.25,-262	0/0:-0,-8.43,-163.9	0/0:-0,-11.44,-227.7	0/0:-0,-4.21,-84	0/0:-0,-9.03,-179.2	0/0:-0,-6.02,-120	0/0:-0,-18.06,-360	0/0:-0,-12.64,-250	0/0:-0,-9.03,-180	0/0:-0,-8.43,-166	0/0:-0,-9.03,-178	0/0:-0,-11.44,-228	0/0:-0,-9.03,-174	0/0:-0,-9.03,-180	0/0:-0,-10.84,-216	0/0:-0,-4.82,-92.2	0/0:-0,-16.26,-324	0/0:-0,-6.62,-128.7	0/0:-0,-8.43,-168	0/0:-0,-11.44,-228	0/0:-0.03,-7.83,-148.1	0/0:-0,-12.04,-238	0/0:-0,-10.24,-204	0/0:-0,-10.84,-213.9	0/0:-0,-7.22,-143.1	0/0:-0,-11.44,-225.9	0/0:-0,-9.03,-178	0/0:-0,-10.84,-215.9	0/0:-0,-12.64,-252	0/0:-0,-4.21,-84	0/1:-138.9,-11.44,-60.06	0/0:-0,-10.84,-216
chr3	29646177	T	<INS:ME:Bov-A2>	PASS	TSD=ATGCAGTATCATTCTTT;ASSESS=5;INTERNAL=NM_001076077.1,INTRONIC;SVTYPE=Bov-A2;SVLEN=268;MEINFO=Bov-A2,1,269,-;DIFF=0.45:c17a,g39t,a53g,c54t,c63t,i68ac,g73a,a75t,g76a,t90a,c97t,a100g,c103t,n129-269;LP=4;RP=1;RA=2;PRIOR=false;SR=6	0/0:-0,-15.65,-312	0/0:-0,-2.41,-48	0/0:-0,-17.46,-346	0/0:-0,-12.64,-252	0/1:-53.2,-7.22,-84.03	0/0:-0,-15.65,-312	0/0:-0,-16.26,-324	0/0:-0.01,-16.86,-329.3	0/0:-0,-7.83,-156	0/0:-0,-7.83,-156	0/0:-0,-9.03,-180	0/0:-0,-4.82,-96	0/0:-0,-16.26,-324	0/0:-0.6,-11.44,-216.6	0/0:-0,-4.21,-84	0/0:-0,-9.63,-192	0/0:-0,-11.44,-228	0/0:-0,-8.43,-168	0/0:-0,-12.64,-252	0/0:-0,-6.62,-132	0/0:-0,-12.64,-250	0/0:-0,-9.63,-188	0/0:-0,-16.86,-336	0/0:-0,-10.84,-216	0/0:-0,-9.03,-180	0/0:-0,-7.22,-140.6	0/0:-0,-11.44,-228	0/0:-0,-9.63,-192	0/0:-0,-11.44,-225.3	0/0:-0,-10.84,-216	0/0:-0,-11.44,-223.1	0/0:-0,-6.62,-130	0/0:-0,-11.44,-228	0/0:-0,-13.25,-264	0/0:-0,-7.83,-156	0/0:-0,-12.04,-240	0/0:-0,-7.83,-156	0/0:-0,-9.63,-192
chr3	34990701	T	<INS:ME:Bov-A2>	PASS	TSD=null;ASSESS=4;INTERNAL=XM_024990049.1,INTRONIC;SVTYPE=Bov-A2;SVLEN=269;MEINFO=Bov-A2,0,269,+;DIFF=1:c32t,c54t,g56a,g73a,g85a,c87t,t142c,a148g,g172a,g198a,c230t,a237g,g241a;LP=77;RP=118;RA=-0.616;PRIOR=false;SR=24	0/0:-0,-25.89,-514	0/1:-80,-13.85,-174	0/0:-0,-18.06,-359.1	0/0:-0,-3.01,-60	0/1:-70,-13.25,-170	0/1:-200,-15.65,-70	0/0:-1.2,-15.05,-273.2	0/1:-52,-12.64,-180	0/1:-134,-22.88,-286	0/0:-0,-10.84,-216	0/0:-0,-15.05,-300	0/1:-44,-4.82,-44	0/0:-0,-9.63,-190	0/0:-0,-14.45,-288	0/0:-0,-7.83,-156	0/0:-0,-6.62,-132	0/0:-0,-8.43,-168	0/1:-52,-9.63,-118	0/0:-0,-13.85,-276	0/0:-0,-5.42,-108	0/1:-57.2,-15.65,-234.03	0/1:-40,-5.42,-54	0/0:-0,-1.81,-36	0/1:-98,-11.44,-106	0/1:-52,-10.84,-148	0/1:-156,-15.05,-102	0/1:-72,-13.25,-172	0/1:-84,-12.64,-148	0/1:-148,-12.04,-62	0/1:-86,-12.64,-154	0/1:-81.6,-15.65,-202	0/0:-0,-18.06,-360	0/1:-133.7,-21.07,-256.01	0/1:-100.8,-14.45,-162.08	0/0:-0,-1.81,-36	0/1:-50,-9.63,-128	0/1:-54,-7.22,-76	0/0:-0,-5.42,-108
chr3	39261282	G	<INS:ME:Bov-A2>	PASS	TSD=null;ASSESS=3;INTERNAL=null,null;SVTYPE=Bov-A2;SVLEN=267;MEINFO=Bov-A2,1,268,-;DIFF=1:g55a,g59a,g193t,g202t,g231a,c240t,a253g,g256a,g265c;LP=65;RP=68;RA=-0.065;PRIOR=false;SR=10	0/0:-0,-13.25,-261	0/1:-142,-13.25,-94	0/0:-0,-8.43,-168	0/0:-0,-11.44,-228	0/1:-90,-13.25,-152	0/0:-0,-8.43,-168	0/0:-0,-6.02,-120	0/0:-0,-13.85,-276	0/0:-0,-12.04,-240	0/0:-0,-9.03,-178.6	0/0:-0.03,-15.05,-294.4	1/1:-112.9,-7.83,-1.2	0/0:-0,-13.85,-276	0/0:-0,-11.44,-228	0/0:-0,-7.22,-142	0/0:-0,-6.02,-120	0/1:-56,-8.43,-108	0/0:-0,-6.02,-120	0/0:-0,-12.64,-252	1/1:-163.2,-10.84,-1.2	0/0:-0,-7.83,-156	0/0:-0,-6.62,-132	0/0:-0,-10.84,-216	0/0:-0,-11.44,-226	0/0:-0,-4.82,-96	0/0:-0,-9.63,-192	0/0:-0,-10.84,-216	0/0:-0,-11.44,-228	0/0:-0,-12.64,-250	0/0:-0,-11.44,-228	0/1:-108,-10.24,-84	0/0:-0,-9.63,-192	0/0:-0,-9.03,-178	0/1:-136,-9.63,-36	0/0:-0,-6.02,-120	0/0:-0,-9.63,-192	0/0:-0,-11.44,-228	0/0:-0,-8.43,-168
chr3	40518023	A	<INS:ME:Bov-A2>	PASS	TSD=ATAAAAGTACAGATTAA;ASSESS=5;INTERNAL=XM_024985040.1,INTRONIC;SVTYPE=Bov-A2;SVLEN=267;MEINFO=Bov-A2,1,268,+;DIFF=0.79:g55t,a68g,c71t,c111t,a118t,t142c,a154g,g198a,g200t,t210g,n237-269;LP=1;RP=5;RA=-2.322;PRIOR=false;SR=14	0/0:-0,-13.25,-264	0/0:-0,-9.03,-180	0/0:-0,-12.64,-252	0/0:-0,-3.61,-72	0/0:-0,-14.45,-288	0/0:-0,-18.06,-360	0/0:-0,-13.85,-276	0/0:-0,-9.03,-180	0/0:-0,-12.04,-240	0/0:-0,-4.82,-96	0/0:-0,-16.86,-336	0/0:-0,-10.84,-216	0/0:-0,-16.26,-324	0/0:-0,-11.44,-228	0/0:-0,-10.24,-204	0/0:-0,-4.21,-84	0/0:-1.2,-9.03,-157.2	0/0:-0,-4.82,-96	0/0:-0,-14.45,-288	0/0:-0,-9.03,-180	0/0:-0,-14.45,-288	0/0:-0,-3.61,-70	0/0:-0,-7.22,-142	0/0:-0,-9.63,-190	0/0:-0,-11.44,-226	0/0:-0,-7.22,-144	0/0:-0,-13.25,-264	0/0:-0,-12.64,-252	0/0:-0,-14.45,-288	0/0:-0,-6.62,-132	0/0:-0,-10.24,-204	0/0:-0,-13.85,-276	0/0:-0,-8.43,-168	0/0:-0,-12.04,-240	0/0:-0,-8.43,-168	0/0:-0,-10.84,-216	0/1:-36,-5.42,-72	0/0:-0,-4.82,-96
chr3	41173331	T	<INS:ME:Bov-A2>	PASS	TSD=null;ASSESS=3;INTERNAL=null,null;SVTYPE=Bov-A2;SVLEN=269;MEINFO=Bov-A2,0,269,-;DIFF=0.98:c22g,c32t,c54t,g73t,g76a,g104a,t122g,a141g,g198a,g226t,g231a,g241a,g247a,c255t,n265-269;LP=12;RP=13;RA=-0.115;PRIOR=false;SR=6	0/0:-0,-12.04,-240	0/0:-0,-5.42,-108	0/0:-0,-12.04,-240	0/0:-0,-6.02,-120	0/1:-92,-13.85,-168	0/0:-0,-13.85,-276	0/0:-0,-13.85,-276	0/0:-0,-7.22,-144	0/0:-0.6,-14.45,-276.6	0/0:-0,-7.83,-156	0/0:-0,-12.04,-240	0/1:-72,-7.83,-72	0/0:-0,-13.85,-274	0/0:-0,-10.24,-204	0/0:-0,-9.63,-192	0/0:-0,-9.03,-180	0/0:-0,-7.22,-144	0/0:-0,-6.02,-120	0/0:-0,-12.64,-252	0/0:-0,-9.63,-192	0/0:-0,-14.45,-288	0/0:-0,-5.42,-108	0/0:-0,-6.62,-132	0/0:-0,-13.25,-264	0/0:-0.6,-9.63,-178.6	0/0:-0,-10.24,-204	0/0:-0,-13.85,-276	0/0:-0,-15.05,-299.8	0/1:-139.2,-13.85,-108	0/0:-0,-10.84,-214	0/0:-0,-8.43,-168	0/0:-0,-18.06,-360	0/0:-0,-9.03,-180	0/0:-0,-14.45,-285	0/0:-0,-10.84,-216	0/0:-0,-8.43,-168	0/0:-0,-10.24,-202	0/0:-0,-7.22,-144
chr3	41747307	T	<INS:ME:Bov-A2>	PASS	TSD=null;ASSESS=3;INTERNAL=null,null;SVTYPE=Bov-A2;SVLEN=268;MEINFO=Bov-A2,1,269,-;DIFF=1:n1,t38a,c54t,g59a,g98a,a100g,g104a,t128c,c130t,t142c,c165t,g198a,g208a,c218a,c230t,c249t,g251c;LP=28;RP=32;RA=-0.193;PRIOR=false;SR=6	0/0:-0,-18.06,-360	0/0:-0,-10.84,-214	0/0:-0,-9.03,-180	0/0:-0.01,-7.83,-151.8	0/1:-52,-15.05,-232	0/0:-0,-12.64,-250.6	0/0:-0,-10.24,-204	0/0:-0,-10.24,-204	0/0:-0,-10.24,-202.6	0/0:-0,-15.05,-297.8	0/0:-0,-10.84,-213.8	0/0:-0,-4.82,-94	0/0:-0,-15.65,-304.9	0/0:-0,-12.04,-238.7	0/0:-0,-10.24,-201.8	0/0:-0,-8.43,-168	0/1:-20.01,-6.62,-91.8	0/0:-0,-8.43,-167.7	0/0:-0,-11.44,-224.4	0/1:-30,-12.04,-182	0/0:-0,-13.85,-273.6	0/0:-0,-4.21,-84	0/0:-0,-5.42,-105.8	0/0:-0,-11.44,-228	0/0:-0,-6.62,-130.8	0/0:-0.6,-10.84,-184.6	0/0:-0,-12.04,-240	0/0:-0,-19.87,-394.7	0/0:-0,-13.85,-274.6	0/0:-0,-13.85,-274.2	0/0:-0,-7.83,-155.3	0/0:-0,-16.26,-324	0/0:-0,-14.45,-282.7	0/0:-0,-11.44,-227.8	0/0:-0,-6.62,-132	0/0:-0,-4.21,-84	0/1:-42,-12.04,-177.9	0/0:-0,-6.02,-116.4
chr3	45728762	A	<INS:ME:Bov-A2>	PASS	TSD=null;ASSESS=4;INTERNAL=NM_174041.2,INTRONIC;SVTYPE=Bov-A2;SVLEN=261;MEINFO=Bov-A2,7,268,-;DIFF=0.83:n1-6,a11t,c17a,c24g,a42t,n46,g52t,c54t,g73t,g82t,c87t,a91g,c97t,g99a,a102g,d107,n108,c111t,c119t,a137c,g213a,a223c,g228t,g231a,n243-269;LP=71;RP=15;RA=2.243;PRIOR=false;SR=8	0/0:-0,-12.04,-237.3	0/1:-60,-9.63,-116	0/0:-0.01,-19.27,-372.4	0/1:-20,-4.21,-60	0/1:-119.6,-11.44,-58.32	0/0:-0,-14.45,-286.2	0/1:-66.2,-12.04,-151.15	0/1:-57.22,-11.44,-145.63	0/1:-38.6,-9.03,-119.65	0/0:-0,-9.03,-178.1	0/1:-52,-11.44,-158.4	0/1:-36.5,-4.21,-32	0/0:-0,-15.65,-303.4	0/0:-0,-18.06,-351	0/0:-0.02,-8.43,-160	0/0:-0,-3.01,-50.2	0/1:-44,-6.62,-82	0/1:-42,-5.42,-58	0/0:-0.6,-12.04,-224.3	0/1:-80,-12.64,-151.6	0/0:-0,-11.44,-223	0/0:-1.73,-7.22,-115.4	1/1:-110.6,-7.22,-0.6	0/0:-0,-7.22,-137.5	0/0:-0,-9.63,-192	0/0:-0,-13.25,-262	0/0:-0.6,-9.63,-177.9	0/0:-0,-15.05,-295.8	0/1:-100.9,-13.25,-126.04	0/0:-0,-10.24,-198.8	0/1:-64.9,-10.24,-114.66	0/0:-0,-17.46,-339.9	0/0:-0,-10.84,-206.3	0/0:-0,-12.04,-236	0/0:-0,-3.61,-72	0/1:-27,-4.82,-58.05	1/1:-60.4,-4.21,-0.6	0/0:-0,-4.82,-96
chr3	52734915	T	<INS:ME:Bov-A2>	PASS	TSD=GAGT;ASSESS=5;INTERNAL=null,null;SVTYPE=Bov-A2;SVLEN=258;MEINFO=Bov-A2,10,268,-;DIFF=0.32:n1-9,n12,c17a,g39t,g55a,c63t,i68ac,g73a,a75t,g76a,g88a,t90a,g98a,a100g,n116-269;LP=8;RP=10;RA=-0.322;PRIOR=false;SR=8	0/0:-0,-12.64,-249.9	0/0:-0,-4.82,-96	0/0:-0,-10.84,-212	0/0:-0,-6.02,-112	0/0:-0,-12.04,-238.2	0/0:-0.6,-7.22,-130	0/0:-0,-6.62,-132	0/0:-0,-11.44,-210.2	0/0:-0,-10.84,-212.8	0/0:-0,-12.04,-236.6	0/0:-0,-9.63,-189.3	0/0:-0.6,-6.62,-103.4	0/0:-0,-12.64,-247	0/0:-0,-7.83,-154	0/0:-0,-5.42,-108	0/0:-0,-6.02,-120	0/0:-0,-6.02,-114	0/0:-0,-3.01,-59.8	0/0:-0,-9.63,-187.4	0/0:-0,-7.83,-148.3	0/0:-0,-10.84,-211.2	0/0:-0,-3.61,-70.8	0/0:-0,-12.64,-252	0/0:-1.2,-8.43,-127.2	0/0:-1.2,-9.03,-155.2	0/0:-0.6,-14.45,-263.8	0/0:-0.01,-9.63,-185.7	0/0:-0,-8.43,-164.9	0/0:-0,-9.03,-178	0/0:-0,-7.22,-144	0/0:-0.6,-9.63,-166.3	0/0:-0,-6.02,-116	0/0:-0.6,-9.03,-162.6	0/0:-0,-7.22,-143	0/0:-0,-15.65,-308.4	0/0:-0,-6.02,-120	0/1:-63.9,-9.03,-97.61	0/0:-0,-6.62,-130.6
chr3	54931836	C	<INS:ME:Bov-A2>	PASS	TSD=ACTC;ASSESS=5;INTERNAL=XM_024986951.1,INTRONIC;SVTYPE=Bov-A2;SVLEN=267;MEINFO=Bov-A2,1,268,-;DIFF=0.31:g4a,c17a,c47g,c54t,g70a,g73a,n84-269;LP=4;RP=3;RA=0.415;PRIOR=false;SR=9	0/0:-0,-12.64,-252	0/0:-0.66,-8.43,-149.1	0/0:-0,-14.45,-288	0/0:-0,-9.03,-173.8	0/0:-0,-14.45,-287.3	0/0:-0,-15.65,-312	0/0:-0,-9.63,-192	0/0:-0,-9.03,-180	0/0:-0,-18.66,-372	0/0:-0,-8.43,-168	0/0:-0.6,-12.04,-226.2	0/1:-13,-6.62,-99.23	0/0:-0,-12.04,-240	0/0:-0,-14.45,-288	0/0:-0.03,-6.62,-120.8	0/0:-0,-4.21,-84	0/0:-0,-9.63,-192	0/0:-0,-6.62,-132	0/0:-0,-13.85,-276	0/0:-0,-9.63,-192	0/0:-0,-20.47,-401.9	0/0:-0,-4.82,-96	0/0:-0.6,-12.64,-240.6	0/0:-0.73,-7.83,-131.8	0/0:-0.61,-7.83,-138.4	0/0:-0,-12.64,-252	0/0:-0,-12.64,-252	0/0:-0,-15.05,-298	0/0:-0,-9.03,-180	0/0:-0,-19.87,-394.4	0/0:-0.68,-14.45,-265.2	0/0:-0,-10.84,-215.4	0/0:-0.6,-12.04,-228.6	0/0:-0,-12.64,-252	0/0:-0,-8.43,-168	0/0:-0,-16.86,-333	0/0:-0,-7.83,-156	0/0:-0,-4.21,-84
chr3	55573095	T	<INS:ME:Bov-A2>	PASS	TSD=T;ASSESS=5;INTERNAL=null,null;SVTYPE=Bov-A2;SVLEN=267;MEINFO=Bov-A2,1,268,-;DIFF=0.46:c9a,c17a,d26-28,n30,n32,c54t,g55a,c63g,g65a,g70a,g73a,t90a,n95-142,d169,n172-173,n175,g185a,g193t,n197-269;LP=4;RP=3;RA=0.415;PRIOR=false;SR=11	0/0:-0,-19.87,-396	0/0:-0.7,-12.04,-215.3	0/0:-0,-19.87,-395.6	0/0:-0,-7.83,-145.2	0/0:-0,-13.25,-264	0/0:-0,-18.06,-356.6	0/0:-0,-15.65,-312	0/0:-0,-16.86,-336	0/0:-0,-15.65,-312	0/0:-0,-10.24,-202	0/0:-0,-17.46,-344.1	0/0:-0,-7.22,-143.3	0/0:-0.6,-8.43,-154.6	0/0:-0,-14.45,-288	0/0:-0,-7.22,-144	0/0:-0,-6.62,-130	0/1:-39.5,-8.43,-119.73	0/0:-0,-5.42,-108	0/0:-0.01,-16.26,-319.8	0/0:-0,-9.03,-180	0/0:-0,-7.83,-155.5	0/0:-0,-7.22,-144	0/0:-0,-4.21,-76	0/1:-48.6,-7.22,-72.2	0/0:-0.62,-7.83,-133.8	0/0:-0,-20.47,-407.2	0/0:-0,-12.04,-239.4	0/0:-0.6,-18.66,-360.6	0/0:-0,-8.43,-168	0/0:-0,-15.05,-297.2	0/0:-0.6,-8.43,-154.4	0/0:-0,-15.05,-300	0/0:-0,-12.64,-252	0/0:-0,-19.27,-380.4	0/0:-0,-7.22,-144	0/0:-0,-6.02,-120	0/0:-0,-9.63,-192	0/0:-0,-10.84,-216
chr3	57960128	C	<INS:ME:Bov-A2>	PASS	TSD=dGAGGAAGG;ASSESS=5;INTERNAL=XM_024990099.1,INTRONIC;SVTYPE=Bov-A2;SVLEN=267;MEINFO=Bov-A2,1,268,-;DIFF=0.99:c54t,c111t,t143c,a148g,t177c,a184g,c197t,g208a,c230t,c240t;LP=5;RP=9;RA=-0.848;PRIOR=false;SR=6	0/0:-1.23,-13.25,-231.7	0/1:-72.3,-15.05,-181.64	0/0:-0,-7.83,-144.5	0/1:-43.4,-16.26,-241.6	0/0:-0.61,-9.63,-165.3	0/0:-0,-15.05,-291.3	0/1:-36.03,-10.24,-154	0/0:-0,-15.65,-301.3	0/0:-1.2,-15.65,-282	0/1:-42.5,-10.84,-152.9	0/1:-60.05,-12.04,-160.9	0/0:-0,-4.82,-90.9	0/0:-0,-11.44,-207.3	0/0:-0.6,-8.43,-143.3	0/1:-42,-9.03,-122.4	0/1:-32.51,-6.62,-80	0/0:-0,-5.42,-104	0/0:-0.6,-13.25,-245.7	0/0:-0.64,-14.45,-253.5	0/0:-0,-7.22,-138.1	0/0:-0.03,-14.45,-272.5	0/0:-0,-3.61,-65.7	0/0:-0.01,-8.43,-156.1	0/0:-0,-12.04,-217.8	0/1:-32,-9.63,-141.9	0/0:-0.66,-11.44,-187.5	0/0:-1.23,-7.83,-118.7	0/0:-0,-11.44,-223	0/0:-2.13,-16.26,-263.21	0/0:-0.6,-4.82,-83.7	0/0:-2.07,-13.85,-199.91	0/0:-0,-15.65,-301.7	0/1:-32.3,-9.03,-136.6	0/0:-1.81,-15.65,-273.01	0/0:-0,-15.65,-304.6	0/0:-0.63,-9.03,-155.9	0/0:-0.03,-8.43,-153.2	0/0:-0,-6.02,-120
chr3	68935011	C	<INS:ME:Bov-A2>	PASS	TSD=null;ASSESS=3;INTERNAL=NM_001076430.2,PROMOTER;SVTYPE=Bov-A2;SVLEN=267;MEINFO=Bov-A2,1,268,+;DIFF=0.84:c24t,t28c,a68g,g88a,i115t,c197t,g219a,n227-269;LP=10;RP=29;RA=-1.536;PRIOR=false;SR=10	0/0:-0,-8.43,-166.9	0/0:-0,-4.82,-79.8	0/0:-0,-12.64,-247.6	0/0:-0,-9.03,-179.7	0/0:-0,-9.03,-179.7	0/0:-0,-10.84,-213.3	0/0:-0,-8.43,-165.7	0/1:-48.4,-10.24,-143.7	0/0:-0,-16.26,-317.2	0/0:-0,-9.03,-172	0/0:-0,-8.43,-164.6	0/0:-0,-8.43,-161	0/0:-0,-18.66,-335.5	0/0:-0,-10.24,-201.2	0/0:-0,-7.22,-135.6	0/0:-0.01,-9.03,-164.5	0/0:-0,-7.83,-156	0/0:-0,-12.04,-239.4	0/0:-0.2,-15.05,-281.2	0/0:-0,-9.03,-178.7	0/0:-0,-9.63,-190.8	0/0:-0.17,-4.21,-73.5	0/1:-20,-5.42,-84	0/0:-0.17,-8.43,-155.3	0/0:-0.05,-9.03,-157.3	0/0:-0.32,-10.24,-170.4	0/1:-34.4,-6.02,-65.61	0/0:-0,-12.04,-239.1	0/0:-0,-10.24,-199.2	0/0:-0,-9.03,-179.9	0/0:-0,-9.03,-173.5	0/0:-0,-12.64,-250.5	0/1:-71.98,-10.84,-118.21	0/0:-0,-10.84,-214.4	0/0:-0,-12.64,-252	0/0:-0,-7.83,-155.6	0/0:-0,-5.42,-108	0/0:-0,-7.83,-153.6
chr3	72117334	T	<INS:ME:Bov-A2>	PASS	TSD=null;ASSESS=3;INTERNAL=null,null;SVTYPE=Bov-A2;SVLEN=266;MEINFO=Bov-A2,2,268,+;DIFF=0:n1,n21,n28,a44c,c47g,a49g,a53g,c54t,a60c,g65a,n74-93,n123-145,c190t,g198a,n207,t229c,c230t,g247a,c255t,n264;LP=5;RP=2;RA=1.322;PRIOR=false;SR=5	0/0:-0,-7.22,-144	0/0:-0.6,-3.01,-47.9	0/0:-0,-9.03,-180	0/0:-0,-7.22,-144	0/0:-0,-11.44,-228	0/0:-0,-13.85,-276	0/0:-0,-13.85,-276	0/0:-0,-13.25,-264	0/0:-0,-13.85,-276	0/0:-0,-6.62,-132	0/0:-0,-9.03,-180	0/0:-0,-16.26,-322	0/0:-0,-7.22,-143.4	0/1:-82,-10.24,-120	0/0:-0,-6.62,-132	0/0:-0,-6.02,-120	0/0:-0,-9.03,-180	0/0:-0,-9.03,-180	0/0:-0,-14.45,-288	0/1:-48,-6.62,-84	0/0:-0,-9.63,-192	0/0:-0,-6.62,-130	0/0:-0,-7.22,-144	0/0:-0,-13.85,-276	0/1:-24,-4.21,-57.1	0/0:-0.6,-8.43,-154.9	0/0:-0,-10.24,-204	0/0:-0,-10.84,-212.8	0/0:-0,-14.45,-285.2	0/0:-0,-11.44,-228	0/0:-0.6,-4.21,-72.6	0/0:-0,-9.63,-192	0/0:-0,-10.84,-216	0/0:-0,-10.84,-215.4	0/0:-0,-9.03,-180	0/0:-0,-9.03,-180	0/0:-0,-10.84,-216	0/0:-0,-9.03,-180
chr3	72841613	C	<INS:ME:Bov-A2>	PASS	TSD=null;ASSESS=3;INTERNAL=NM_001205414.2,INTRONIC;SVTYPE=Bov-A2;SVLEN=267;MEINFO=Bov-A2,1,268,-;DIFF=0.96:c32g,c54t,g73a,g98a,g104t,c111t,t129c,a160g,g193t,g200a,g202a,g211a,t215c,g216t,c218a,t222c,a237g,t259g,c266g;LP=8;RP=7;RA=0.193;PRIOR=false;SR=11	0/0:-0.6,-7.22,-132.6	0/0:-0,-9.63,-192	0/0:-0,-15.05,-298.2	0/0:-0,-3.61,-70.7	0/0:-0,-9.63,-192	0/0:-0,-13.85,-276	0/0:-0.6,-12.04,-228.6	0/0:-0,-14.45,-286	0/0:-0,-15.65,-312	0/0:-0.6,-11.44,-216.6	0/0:-1.81,-16.26,-287.81	0/1:-48,-10.84,-168	0/0:-0,-18.66,-372	0/0:-0,-10.24,-204	0/0:-0,-9.03,-180	0/0:-0.6,-9.03,-168.6	0/0:-0.6,-11.44,-216.6	0/0:-0,-4.21,-84	0/0:-0,-15.65,-312	0/0:-0,-8.43,-168	0/0:-0.6,-13.85,-264.6	0/0:-0,-5.42,-108	0/0:-0,-4.21,-84	0/0:-1.2,-12.04,-217.2	0/0:-0,-14.45,-288	0/0:-0,-11.44,-224.9	0/0:-0.6,-15.65,-298.6	0/0:-0,-12.04,-240	0/0:-0,-17.46,-346	0/0:-0,-13.85,-276	0/0:-0,-7.22,-144	0/0:-0,-16.26,-322	0/0:-0.6,-15.05,-288.6	0/0:-0.05,-15.05,-294.2	0/0:-0,-7.22,-144	0/0:-0,-6.62,-132	0/0:-0.6,-7.83,-144.6	0/0:-0,-7.22,-144
chr3	85670906	T	<INS:ME:Bov-A2>	PASS	TSD=null;ASSESS=3;INTERNAL=null,null;SVTYPE=Bov-A2;SVLEN=266;MEINFO=Bov-A2,2,268,-;DIFF=0.64:n1,n17-23,t50a,a53t,c54t,a60c,a68g,t72a,g82a,c103a,c111t,g112a,g151a,c197t,g216t,g219a,c240t;LP=7;RP=7;RA=0;PRIOR=false;SR=4	0/0:-0,-12.04,-238.7	0/0:-0,-9.63,-181	0/0:-0,-17.46,-347.4	0/0:-0,-9.03,-180	0/0:-0,-10.84,-216	0/0:-0,-16.26,-324	0/0:-0,-10.84,-216	0/0:-0,-12.04,-238.6	0/0:-0,-15.05,-300	0/0:-0,-11.44,-225.4	0/0:-0,-7.83,-155.2	0/0:-0,-10.84,-215.7	0/0:-0,-13.85,-276	0/0:-0,-12.04,-240	0/0:-0,-7.22,-144	0/0:-0,-10.24,-203.1	0/0:-0,-11.44,-227.4	0/0:-0,-10.24,-204	0/0:-0,-8.43,-167.4	0/0:-0,-11.44,-228	0/0:-0,-12.64,-252	0/0:-0,-3.61,-72	0/0:-0,-5.42,-108	0/0:-0,-9.03,-178.7	0/1:-48,-12.04,-184	0/0:-0,-12.04,-234.1	0/0:-0,-17.46,-344.8	0/0:-0,-8.43,-168	0/0:-0,-10.84,-216	0/0:-0,-15.05,-300	0/0:-0,-10.84,-214	0/0:-0,-13.85,-275.6	0/0:-0,-10.24,-204	0/0:-0,-10.24,-204	0/0:-0,-10.24,-204	0/0:-0,-8.43,-167.3	0/0:-0,-8.43,-168	0/0:-0,-7.83,-156
chr3	86006716	A	<INS:ME:Bov-A2>	PASS	TSD=GA;ASSESS=5;INTERNAL=XM_024989858.1,PROMOTER;SVTYPE=Bov-A2;SVLEN=267;MEINFO=Bov-A2,1,268,+;DIFF=0.37:a5g,c9a,n17,n25,n30,a42g,c46t,n50,n54,g55a,t64a,t67c,g73a,c78t,g82a,g84c,g85a,g88t,t90a,a94c,g98a,c103a,a105c,c111t,t116a,n120-120,n128-142,a148g,n172,t173a,c189t,g193t,g198a,g200a,t207a,t210c,g211a,g216a,c218a,c221t,t222c,g225a,g227c,g228a,g231t,c234a,g241a,c246a,n252-269;LP=5;RP=12;RA=-1.263…	0/0:-1.2,-13.25,-237.5	0/0:-0,-7.22,-144	0/0:-0,-10.84,-216	0/1:-106,-8.43,-60	0/0:-0.6,-15.65,-300.6	0/1:-69.41,-12.04,-163.7	0/0:-0,-9.63,-192	0/1:-80,-16.26,-240	0/0:-0,-13.85,-276	0/0:-0,-10.84,-216	0/1:-65.7,-16.26,-250.2	0/0:-0.6,-7.22,-132.6	0/0:-0,-9.63,-189.2	0/1:-93.6,-13.25,-168	0/0:-0.6,-7.83,-143.6	0/1:-42.7,-5.42,-60	0/0:-0,-10.84,-216	0/0:-1.2,-12.04,-217.2	0/0:-0,-11.44,-228	0/0:-0,-6.62,-132	0/0:-0,-13.25,-264	0/0:-0,-5.42,-108	0/1:-60,-6.02,-60	0/1:-92.1,-8.43,-59.59	0/0:-0,-4.82,-93.5	0/0:-0.6,-10.84,-204.6	0/1:-43.4,-9.03,-132.02	0/0:-1.2,-8.43,-145.2	0/0:-0,-19.87,-396	0/0:-0,-13.85,-276	0/1:-30,-6.62,-95.1	0/0:-0,-16.26,-323.5	0/1:-101.5,-15.65,-192.04	0/1:-118.7,-12.04,-119.7	0/0:-0,-7.83,-156	0/1:-43.9,-6.02,-72	0/0:-0,-13.25,-264	0/1:-53.3,-6.62,-72.01
chr3	86819183	T	<INS:ME:Bov-A2>	PASS	TSD=null;ASSESS=4;INTERNAL=null,null;SVTYPE=Bov-A2;SVLEN=267;MEINFO=Bov-A2,1,268,-;DIFF=0.28:n16,c17a,n54-56,a57t,g65a,g73a,n88-88,n90,c97t,n120-142,g172a,n177-269;LP=4;RP=7;RA=-0.807;PRIOR=false;SR=9	0/0:-0.6,-6.02,-107	0/0:-0,-15.65,-304.8	0/0:-0.6,-17.46,-330.6	0/0:-0,-12.64,-250	0/0:-0.6,-7.22,-131.2	0/0:-0,-8.43,-163.3	0/0:-0,-7.83,-156	0/0:-0,-11.44,-228	0/0:-0,-14.45,-288	0/0:-0,-4.82,-94	0/0:-0,-13.85,-276	0/0:-0,-6.02,-118.2	0/0:-0,-18.66,-368	0/0:-0,-10.84,-216	0/1:-22,-4.21,-58	0/0:-0,-4.82,-87.2	0/0:-0,-7.22,-144	0/1:-54.61,-5.42,-38.91	0/0:-0,-9.63,-188.3	0/0:-0.61,-4.82,-80.5	0/0:-0,-16.26,-321.3	0/0:-0,-8.43,-159.6	0/0:-0,-16.26,-324	0/0:-0,-11.44,-222	0/0:-0,-7.22,-144	0/0:-0,-15.65,-310.6	1/1:-46.6,-3.01,-0.6	0/0:-0.61,-9.03,-159.1	0/0:-0,-13.85,-276	0/0:-0.01,-5.42,-100.4	0/0:-0,-9.03,-180	0/0:-0,-13.85,-276	1/1:-80.5,-4.82,-0.6	0/0:-0,-2.41,-46	0/1:-27.6,-3.01,-22.11	0/0:-0,-9.63,-192	0/0:-0,-8.43,-168	0/0:-1.2,-7.83,-133.2
chr3	89420440	A	<INS:ME:Bov-A2>	PASS	TSD=null;ASSESS=4;INTERNAL=XM_015465692.2,INTRONIC;SVTYPE=Bov-A2;SVLEN=267;MEINFO=Bov-A2,1,268,-;DIFF=0.99:a10g,g55a,a68g,c87t,a92g,c103t,g108c,g112a,g156t,c158a,g183c,a186g,c189t,g194a,c197t,g200c,g212c,t222c,a223g,c240t,n252,n268-269;LP=189;RP=209;RA=-0.145;PRIOR=false;SR=63	0/1:-90,-15.65,-216	0/1:-76,-12.04,-156	0/1:-62,-7.83,-83.4	1/1:-86,-4.82,-0	0/1:-106,-9.03,-57.1	0/1:-44,-7.83,-105.2	0/1:-61.4,-7.83,-83.6	0/1:-92,-13.85,-180	0/1:-66,-8.43,-83.1	0/0:-0,-9.63,-192	0/1:-134,-11.44,-72	0/1:-71.6,-10.84,-132	0/0:-0,-14.45,-281.1	0/1:-64,-11.44,-156	0/0:-0.3,-11.44,-222.3	0/1:-92,-10.84,-108	1/1:-167.1,-9.03,-0	0/1:-68.2,-11.44,-144.43	0/0:-0,-22.88,-454	1/1:-63.2,-4.21,-0.6	0/1:-239.3,-18.06,-84	0/1:-106,-7.83,-36	0/1:-56,-4.21,-24	0/1:-218.2,-19.87,-137.5	0/1:-173.2,-12.04,-36	0/0:-0,-14.45,-288	0/1:-108,-11.44,-108	0/1:-124,-12.04,-96	0/1:-78,-8.43,-84	0/1:-80,-10.24,-119.1	0/0:-0,-10.84,-216	0/1:-132,-10.84,-72	0/0:-1.2,-9.63,-166.6	0/0:-0,-12.04,-236.3	0/0:-0,-7.22,-144	1/1:-154.6,-9.03,-0.6	1/1:-260.6,-15.05,-0.6	0/1:-32,-7.22,-108
chr3	101323767	C	<INS:ME:Bov-A2>	PASS	TSD=GAAAACAGAATCTC;ASSESS=5;INTERNAL=XM_005204853.4,INTRONIC;SVTYPE=Bov-A2;SVLEN=269;MEINFO=Bov-A2,0,269,+;DIFF=0.75:c24t,c46t,c54t,g88a,t90a,g110a,c111t,a118g,c140t,a141g,n198,a223c,g242t;LP=6;RP=6;RA=0;PRIOR=false;SR=7	0/0:-0,-23.48,-468	0/0:-0,-12.64,-252	0/0:-0,-12.64,-252	0/0:-0,-12.04,-240	0/0:-0,-8.43,-168	0/0:-0,-7.83,-156	0/0:-0,-13.25,-264	0/0:-0,-12.04,-240	0/0:-0,-15.05,-299.6	0/0:-0,-10.24,-204	0/0:-0,-13.25,-260.4	0/0:-0,-7.83,-156	0/0:-0,-12.04,-238	0/0:-0,-10.84,-216	0/0:-0,-9.03,-180	0/0:-0,-5.42,-108	0/1:-107.8,-11.44,-108	0/0:-0,-6.02,-120	0/0:-0,-19.27,-384	0/0:-0,-11.44,-228	0/0:-0,-9.63,-192	0/0:-0,-3.61,-72	0/0:-0,-10.24,-204	0/0:-0,-13.85,-276	0/0:-0,-15.05,-300	0/0:-0,-6.02,-120	0/0:-0,-10.84,-216	0/0:-0,-7.83,-156	0/0:-0,-11.44,-227.7	0/0:-0,-12.04,-238.2	0/0:-0,-7.22,-144	0/0:-0,-12.04,-240	0/0:-0,-9.03,-180	0/0:-0,-8.43,-168	0/0:-0,-10.84,-216	0/0:-0,-7.22,-144	0/0:-0,-12.04,-240	0/0:-0,-9.63,-192
chr3	106348800	C	<INS:ME:Bov-A2>	PASS	TSD=null;ASSESS=3;INTERNAL=NM_001098161.1,PROMOTER;SVTYPE=Bov-A2;SVLEN=269;MEINFO=Bov-A2,0,269,-;DIFF=0.97:a21g,c54t,g93a,g98a,c111t,g211a,g216a,g231a,c255t,n265-269;LP=28;RP=35;RA=-0.322;PRIOR=false;SR=10	0/0:-1.2,-7.83,-127.2	0/1:-50.1,-13.25,-191.5	0/0:-0,-12.64,-250	0/1:-104.3,-13.85,-148	0/1:-40,-11.44,-171	0/0:-0.6,-9.63,-173.9	0/0:-1.2,-15.05,-264.8	0/1:-52,-13.85,-204.8	0/0:-0,-16.86,-333.4	0/0:-0,-10.84,-216	0/0:-0,-11.44,-226.6	0/1:-122,-10.24,-50.7	0/0:-0,-17.46,-346	0/0:-0,-10.84,-216	0/0:-1.21,-9.03,-151	0/0:-0,-5.42,-108	0/1:-42,-5.42,-50	0/0:-0,-10.24,-203.7	0/0:-1.2,-12.64,-211.7	0/0:-0.6,-8.43,-156.6	0/0:-0,-13.25,-263.9	0/1:-32,-5.42,-66	0/1:-34.8,-10.24,-146.01	0/1:-62,-12.04,-161.5	0/1:-41.6,-10.84,-159.8	0/1:-27.1,-10.84,-146.1	0/1:-64,-13.25,-175.5	0/0:-0,-10.84,-215.9	0/0:-0,-13.25,-264	0/1:-82,-17.46,-226.7	0/1:-90.4,-14.45,-149.9	0/0:-0,-13.25,-261.7	0/0:-0,-9.63,-189.7	0/1:-117,-14.45,-128.7	0/1:-86,-9.63,-92	0/0:-0,-10.84,-214.3	0/1:-66,-9.03,-101.8	0/0:-0,-9.03,-178.6
chr3	107393376	G	<INS:ME:Bov-A2>	PASS	TSD=AAAACTG;ASSESS=5;INTERNAL=null,null;SVTYPE=Bov-A2;SVLEN=267;MEINFO=Bov-A2,1,268,-;DIFF=0.48:t38c,c54t,c62t,a92g,c111t,n136-141,c246t;LP=3;RP=3;RA=0;PRIOR=false;SR=4	0/0:-0,-7.83,-156	0/0:-0,-14.45,-288	0/0:-0,-9.03,-177.1	0/0:-0,-8.43,-168	0/0:-0,-12.64,-250	0/0:-0,-12.04,-240	0/0:-0,-16.26,-324	0/0:-0,-12.04,-240	0/0:-0,-10.84,-216	0/0:-0,-12.04,-236.6	0/0:-0,-11.44,-228	0/0:-0,-7.22,-144	0/0:-0,-15.05,-300	0/0:-0,-12.04,-240	0/0:-0,-7.83,-154	0/0:-0,-6.02,-120	0/0:-0,-10.84,-216	0/0:-0,-10.24,-204	0/0:-0,-10.24,-204	0/0:-0,-10.24,-204	0/0:-0.6,-13.85,-264.6	0/0:-0,-4.21,-84	0/0:-0,-5.42,-108	0/0:-0,-7.83,-156	0/0:-0,-4.82,-96	0/0:-0,-9.63,-190	0/0:-0,-13.25,-264	0/0:-0,-10.24,-204	0/0:-0,-7.83,-156	0/0:-0,-16.26,-323.6	0/0:-0,-11.44,-228	0/0:-0,-12.04,-240	0/0:-0,-18.06,-359.5	0/0:-0,-8.43,-168	0/0:-0,-7.22,-144	0/0:-0,-10.24,-204	0/1:-72.1,-6.62,-48.69	0/0:-0,-4.82,-96
chr3	113996027	C	<INS:ME:Bov-A2>	PASS	TSD=dTAGCCTACCAGGCTCCG;ASSESS=5;INTERNAL=null,null;SVTYPE=Bov-A2;SVLEN=267;MEINFO=Bov-A2,1,268,-;DIFF=0.51:c9a,c17g,c30t,a57g,g73a,a75c,c87t,t90a,g98a,c119t,n138-269;LP=31;RP=22;RA=0.495;PRIOR=false;SR=44	0/0:-1.84,-16.26,-268.01	0/0:-0.6,-14.45,-249.7	0/1:-44.5,-12.04,-187.7	0/0:-0,-9.03,-180	0/0:-0.02,-8.43,-151.8	0/1:-74.9,-12.64,-157.7	0/0:-0.6,-11.44,-214	0/0:-0.04,-8.43,-148.2	0/0:-0,-9.03,-178	0/0:-0.01,-7.83,-144.9	0/0:-0,-10.84,-210.1	0/0:-0.6,-4.21,-66.6	0/0:-0,-15.65,-310.6	0/0:-0,-12.04,-240	0/0:-0.17,-9.63,-183.3	0/0:-0,-6.02,-116	0/0:-0,-12.64,-252	0/0:-0.6,-6.62,-109.7	0/0:-0,-11.44,-223.4	0/0:-0,-6.02,-115	0/0:-0.68,-12.04,-206.5	0/0:-0,-3.61,-70	0/0:-0,-7.83,-145.4	0/0:-0.6,-12.04,-216.9	0/0:-0,-7.22,-131.4	0/0:-0,-10.84,-208.4	0/0:-1.83,-15.05,-251.01	0/0:-0.6,-7.83,-129.6	0/0:-0.6,-7.83,-138.1	0/0:-0,-10.24,-190.6	0/0:-0,-8.43,-158.3	0/0:-0,-12.64,-236.3	0/0:-0,-10.24,-198.2	0/0:-2.2,-12.04,-190.3	0/0:-0,-9.63,-189.4	0/0:-0,-5.42,-106.1	0/0:-0.6,-11.44,-214.7	0/0:-0.6,-7.83,-139
chr4	12661771	G	<INS:ME:Bov-A2>	PASS	TSD=null;ASSESS=3;INTERNAL=NM_001013588.1,INTRONIC;SVTYPE=Bov-A2;SVLEN=267;MEINFO=Bov-A2,1,268,+;DIFF=0.98:c54t,g61c,t67a,a68g,a91g,a94g,c140t,a141g,t142c,c230t,g241a,c255t,c266t;LP=21;RP=83;RA=-1.983;PRIOR=false;SR=32	0/0:-0,-13.25,-264	0/0:-0,-10.24,-204	0/0:-0.03,-15.65,-306.3	0/0:-0,-4.82,-96	0/1:-52,-18.66,-312	0/0:-1.2,-12.04,-217.2	0/0:-1.81,-17.46,-313.81	0/0:-0,-17.46,-348	0/1:-62,-15.65,-238	0/0:-0,-7.83,-156	0/0:-0,-12.64,-252	0/0:-0,-19.27,-382	0/1:-30,-11.44,-192	0/0:-0,-16.26,-321.5	0/0:-0,-13.25,-264	0/0:-0,-6.62,-132	0/0:-0,-10.84,-216	0/1:-44,-7.83,-108	0/0:-0,-12.64,-248.4	0/1:-84,-10.84,-120	0/0:-0,-20.47,-406.8	0/0:-0,-5.42,-108	0/0:-0,-6.02,-120	0/0:-0,-12.04,-240	0/0:-0,-9.03,-180	0/0:-1.81,-14.45,-251.81	0/0:-0,-18.06,-360	0/1:-52,-14.45,-228	0/1:-70,-22.88,-372	0/0:-0,-11.44,-226.8	0/0:-0,-12.04,-240	0/0:-0,-15.65,-312	0/0:-0.6,-18.66,-360.6	0/0:-0,-16.26,-324	0/0:-0.6,-2.41,-36.6	0/0:-0,-13.85,-272.1	0/0:-0,-9.63,-192	0/1:-74,-12.04,-156
chr4	14166616	A	<INS:ME:Bov-A2>	PASS	TSD=dGGTTT;ASSESS=5;INTERNAL=null,null;SVTYPE=Bov-A2;SVLEN=267;MEINFO=Bov-A2,1,268,-;DIFF=1:c9t,g83a,g98c,a137g,a148g,g150a,g198t,g204a,c205g,g219a,g241a,c249a;LP=13;RP=11;RA=0.241;PRIOR=false;SR=10	0/0:-0,-11.44,-228	0/0:-0,-4.82,-96	0/0:-0,-13.85,-274	0/0:-0,-1.2,-24	0/0:-0,-10.84,-216	0/0:-0,-12.04,-240	0/0:-1.2,-10.84,-193.2	0/0:-0,-9.63,-192	0/0:-0,-13.85,-276	0/0:-0,-11.44,-228	0/0:-0,-15.65,-311.1	0/1:-36,-10.24,-168	0/0:-0,-15.65,-312	0/0:-0,-16.26,-324	0/0:-0,-7.83,-156	0/0:-0,-4.82,-95.8	0/0:-0.6,-8.43,-156.6	0/0:-0,-8.43,-168	0/0:-0,-11.44,-228	0/0:-1.2,-11.44,-205.2	0/0:-0,-9.03,-180	0/0:-0,-3.01,-60	0/0:-0,-7.22,-144	0/1:-60,-8.43,-108	0/0:-0,-6.02,-120	0/0:-0,-9.03,-180	0/0:-0,-15.05,-300	0/0:-0,-9.63,-192	0/0:-0,-16.26,-324	0/0:-0,-10.24,-204	0/0:-0,-10.84,-216	0/0:-0,-7.22,-141.6	0/0:-0,-13.25,-264	0/0:-0,-16.86,-334.1	0/0:-0,-13.25,-264	0/1:-36,-7.83,-120	0/0:-1.2,-8.43,-145.2	0/0:-0,-6.62,-132
chr4	17626255	C	<INS:ME:Bov-A2>	PASS	TSD=null;ASSESS=3;INTERNAL=null,null;SVTYPE=Bov-A2;SVLEN=269;MEINFO=Bov-A2,0,269,-;DIFF=0.93:n1-4,c17a,t23g,c25t,c46t,a60g,a68g,a92g,g95a,c97t,t107g,c111t,c119t,c123a,a124t,c125t,c197t,g212a,n215,g216a,g219a,g241a,g256a;LP=71;RP=40;RA=0.828;PRIOR=false;SR=30	0/0:-0,-10.84,-216	0/1:-171.7,-15.65,-103.9	0/0:-0,-8.43,-168	0/1:-80,-9.63,-96	0/0:-0,-11.44,-226.4	0/1:-124,-12.64,-108	0/0:-0,-11.44,-228	0/0:-0,-7.83,-156	0/1:-161.9,-14.45,-96	0/0:-0,-8.43,-162.7	0/0:-0,-10.24,-204	1/1:-85.5,-4.82,-0	0/0:-0,-15.65,-309.6	0/1:-140.4,-14.45,-120.22	0/0:-0,-6.62,-132	0/1:-30.9,-4.82,-58	0/1:-152,-14.45,-106.2	0/0:-0,-10.24,-204	0/0:-0,-15.05,-300	0/0:-0,-7.83,-156	0/0:-0,-11.44,-226.7	1/1:-80.3,-5.42,-0.6	0/1:-116,-9.63,-60	0/0:-0,-9.63,-190	0/0:-0,-10.84,-214	0/1:-122,-13.85,-130	0/0:-0,-11.44,-226	0/0:-0,-4.21,-84	0/0:-0,-12.64,-250.8	0/0:-0,-6.62,-132	0/1:-96.4,-10.84,-96	0/0:-0,-9.03,-180	0/0:-0.01,-10.24,-199.8	0/0:-0,-10.84,-216	0/1:-152,-20.47,-228	0/0:-0,-7.22,-144	0/0:-0,-8.43,-168	0/0:-0,-7.22,-144
chr4	17632084	T	<INS:ME:Bov-A2>	PASS	TSD=TTTTTTT;ASSESS=5;INTERNAL=null,null;SVTYPE=Bov-A2;SVLEN=267;MEINFO=Bov-A2,1,268,-;DIFF=1:c32a,t38c,a68g,g98a,a137c,a152c,g193t,c197t,g200a,g202a,g211a,c218a,t222c,g231c,c240g;LP=54;RP=6;RA=3.17;PRIOR=false;SR=13	0/0:-0,-27.69,-552	0/0:-0,-4.21,-84	0/0:-0,-7.22,-144	0/0:-0.6,-2.41,-36.6	0/0:-0.01,-15.05,-286.4	0/0:-1.81,-15.65,-275.11	0/0:-0,-10.84,-216	0/0:-0,-18.66,-371.6	0/0:-0.6,-9.03,-167.5	0/0:-0,-7.22,-142.9	0/0:-0,-13.85,-273	0/0:-0.6,-9.63,-180.6	0/0:-0,-12.64,-251.8	0/1:-32,-11.44,-190	0/0:-0,-11.44,-224.6	0/0:-0,-10.84,-216	0/1:-20,-3.01,-34	0/0:-0,-5.42,-108	0/0:-0,-15.05,-297.8	0/0:-0,-6.02,-120	0/0:-0,-14.45,-284	0/0:-0,-2.41,-46	0/0:-0,-4.21,-84	0/0:-0,-12.64,-250.8	0/0:-0,-7.22,-144	0/0:-0.03,-16.86,-325.9	0/0:-0.13,-10.24,-198	0/0:-0,-16.86,-334.8	0/0:-0,-15.05,-299	0/0:-0,-8.43,-168	0/0:-0,-11.44,-223	0/0:-0,-18.06,-358	0/0:-0,-12.64,-248.9	0/0:-0,-13.85,-276	0/0:-0,-3.01,-60	0/0:-0,-4.82,-96	0/0:-0,-6.02,-116.7	0/0:-0,-7.22,-142.9
chr4	17950981	T	<INS:ME:Bov-A2>	PASS	TSD=null;ASSESS=3;INTERNAL=null,null;SVTYPE=Bov-A2;SVLEN=267;MEINFO=Bov-A2,1,268,+;DIFF=1:c37t,c54t,g85a,g88a,a91g,g104a,t127g,a153c,g200c,g216a,g219a,t220c,c240t,c246t,g256a,c266t;LP=3;RP=16;RA=-2.415;PRIOR=false;SR=6	0/0:-0.6,-17.46,-335.6	0/0:-0,-14.45,-286	0/0:-0.6,-13.25,-252.6	0/0:-0,-4.21,-84	0/1:-57.5,-12.04,-179.5	0/0:-0,-19.27,-383.2	0/0:-0,-7.22,-144	0/0:-0,-16.86,-330.4	0/0:-0,-22.28,-443.3	0/0:-0,-10.84,-216	0/0:-0,-7.22,-144	0/0:-0,-12.04,-240	0/0:-0,-20.47,-408	0/0:-0,-13.25,-264	0/0:-0,-7.22,-141.4	0/0:-0,-4.82,-96	0/0:-0,-9.63,-192	0/0:-0,-4.82,-96	0/0:-0,-13.85,-276	0/0:-0,-7.22,-144	0/0:-0,-15.05,-299.1	0/0:-0,-4.82,-96	0/0:-0,-14.45,-288	0/0:-0,-10.84,-214	0/0:-0.6,-7.83,-142.1	0/0:-1.2,-13.25,-231.2	0/0:-0,-13.25,-264	0/0:-0,-9.03,-179.4	0/0:-0,-12.04,-238	0/0:-0,-10.84,-216	0/0:-0,-10.84,-216	0/0:-0,-19.87,-396	0/0:-0,-13.25,-261.4	0/0:-0,-9.63,-192	0/0:-0,-7.83,-156	0/0:-0,-7.83,-156	0/0:-0,-7.83,-156	0/0:-0,-10.24,-204
chr4	20692892	G	<INS:ME:Bov-A2>	PASS	TSD=CAGTG;ASSESS=5;INTERNAL=NM_174177.2,INTRONIC;SVTYPE=Bov-A2;SVLEN=267;MEINFO=Bov-A2,1,268,+;DIFF=1:t77a,c89a,t90g,c97t,a131c,a160g,g231a,c234t,g241a,c255t,g265a;LP=27;RP=25;RA=0.111;PRIOR=false;SR=7	0/0:-0,-16.26,-324	0/0:-0,-9.63,-192	0/0:-0,-12.04,-238.6	0/1:-176,-14.45,-84	0/1:-132,-15.05,-141.9	0/0:-0,-10.24,-202	0/0:-0,-13.25,-264	0/0:-0,-13.25,-264	0/0:-0,-12.04,-240	0/0:-0,-10.24,-204	0/0:-0,-9.63,-192	0/0:-0,-9.63,-192	0/0:-0,-23.48,-467.6	0/0:-0.03,-12.04,-232.9	0/0:-0,-9.63,-192	0/0:-0,-4.82,-96	0/0:-0,-14.45,-288	0/0:-0,-12.04,-240	0/0:-0,-9.63,-192	0/1:-142,-14.45,-120	0/0:-0,-9.63,-192	0/0:-0,-4.21,-82	0/0:-0,-11.44,-228	0/0:-0,-1.81,-36	0/0:-0,-8.43,-168	0/0:-0,-12.04,-238.5	0/0:-0,-12.64,-252	0/0:-0,-11.44,-228	0/0:-0,-9.63,-192	0/0:-0,-12.04,-240	0/0:-0.6,-8.43,-156.6	0/0:-0,-10.84,-216	0/0:-0,-6.62,-132	0/0:-0,-12.64,-250	0/0:-0,-8.43,-168	0/0:-0,-8.43,-168	0/1:-122,-15.05,-156	0/0:-0,-7.22,-144
chr4	20940517	A	<INS:ME:Bov-A2>	PASS	TSD=null;ASSESS=4;INTERNAL=null,null;SVTYPE=Bov-A2;SVLEN=269;MEINFO=Bov-A2,0,269,+;DIFF=1:t38c,g66t,a92g,a102c,c162t,c206t,c218t,c255t,c266t;LP=118;RP=97;RA=0.283;PRIOR=false;SR=16	0/0:-0,-12.04,-240	0/0:-0,-9.63,-192	0/0:-0,-15.05,-300	1/1:-213.5,-13.25,-0.6	0/1:-96,-9.03,-72	0/0:-0,-9.63,-192	0/1:-154,-18.66,-192	0/0:-0,-14.45,-287.4	0/0:-0,-13.25,-264	0/0:-0,-11.44,-228	0/0:-0,-12.04,-240	0/1:-184,-17.46,-132	0/0:-0,-14.45,-288	0/0:-0,-15.65,-312	0/0:-0,-9.63,-192	0/0:-0,-7.83,-156	0/1:-124,-10.24,-60	0/0:-0,-10.24,-204	0/0:-0,-23.48,-468	0/1:-120,-12.04,-96	0/0:-0,-12.64,-252	0/0:-0,-2.41,-48	0/0:-0,-6.02,-120	0/1:-52.8,-6.62,-72	0/0:-0,-10.24,-204	0/1:-286,-24.08,-144	0/0:-0,-8.43,-168	0/0:-0,-10.24,-204	0/0:-0,-12.04,-239.1	0/0:-0,-9.03,-180	0/0:-0,-11.44,-228	0/0:-0,-15.65,-312	0/0:-0,-10.84,-216	0/0:-0,-13.85,-274.8	0/0:-0,-3.61,-72	0/1:-50,-7.22,-84	0/1:-160,-15.05,-108	0/0:-0,-8.43,-168
chr4	28078940	T	<INS:ME:Bov-A2>	PASS	TSD=null;ASSESS=3;INTERNAL=null,null;SVTYPE=Bov-A2;SVLEN=267;MEINFO=Bov-A2,2,269,-;DIFF=1:c54t,a91g,a94g,g98a,c114t,n197,g198t,g202a,c218a,g247a,g251a,c258t,t259g;LP=2;RP=19;RA=-3.248;PRIOR=false;SR=8	0/0:-0,-13.85,-276	0/0:-0,-7.22,-140	0/0:-0,-11.44,-226.8	0/0:-0,-9.63,-192	0/0:-0,-9.63,-187.2	0/0:-0,-9.63,-190	0/0:-0,-12.04,-236.2	0/1:-23.4,-8.43,-132.01	0/0:-0,-10.84,-216	0/0:-0,-12.64,-252	0/0:-0,-12.64,-248	0/0:-0,-7.22,-142	0/0:-0.01,-17.46,-334.5	0/0:-0,-4.21,-84	0/0:-0,-9.63,-190.8	0/0:-0,-5.42,-108	0/0:-0,-9.03,-174	0/0:-0,-6.62,-132	0/0:-0,-13.25,-264	0/0:-0,-7.83,-156	0/0:-0,-8.43,-168	0/0:-0,-9.63,-181.9	0/0:-0,-10.84,-216	0/0:-0.22,-6.62,-122.4	0/0:-0.05,-9.63,-183.4	0/1:-93.1,-19.27,-237.13	0/0:-0,-10.84,-216	0/0:-0,-11.44,-226	0/0:-0,-9.63,-184.9	0/0:-0,-6.62,-132	0/1:-30,-10.84,-178.7	0/0:-0,-9.63,-189.3	0/0:-0,-9.03,-180	0/0:-0.01,-6.62,-126.9	0/0:-0,-14.45,-288	0/0:-0,-4.82,-96	0/0:-0,-12.04,-237.4	0/0:-0,-4.21,-84
chr4	35804826	T	<INS:ME:Bov-A2>	PASS	TSD=ACAGTAATCAAT;ASSESS=5;INTERNAL=null,null;SVTYPE=Bov-A2;SVLEN=267;MEINFO=Bov-A2,1,268,-;DIFF=0.48:g55a,c79t,c87t,t90a,g112a,n129-141,n164,c168t,a169g,g170a,g172a,g185a,g193t,n198-269;LP=108;RP=90;RA=0.263;PRIOR=false;SR=65	0/0:-0,-9.03,-180	0/1:-126.1,-12.04,-82	0/0:-0,-15.05,-298	1/1:-62.6,-4.21,-0.6	0/1:-61,-7.83,-84.02	0/1:-54,-7.22,-84	0/1:-84,-12.04,-144	0/0:-0,-9.03,-178	0/1:-96,-13.85,-168	0/1:-48.5,-6.62,-70	1/1:-202,-11.44,-0	0/1:-72.2,-6.62,-48	0/0:-0,-15.05,-298	0/0:-0,-13.85,-276	0/1:-53.3,-10.84,-144.06	0/0:-0,-3.01,-60	1/1:-90,-5.42,-0	0/0:-0,-10.24,-204	0/0:-0,-11.44,-228	0/1:-62,-10.24,-132	0/0:-0,-9.63,-192	0/0:-0,-5.42,-108	0/0:-0,-10.24,-204	1/1:-116.2,-7.83,-1.2	0/1:-81.5,-10.24,-104	0/1:-91.7,-11.44,-120	0/0:-0,-13.25,-262	0/0:-0,-10.84,-216	0/1:-154,-14.45,-120	0/0:-0,-9.63,-192	1/1:-223.5,-13.85,-0.6	0/0:-0,-15.65,-312	0/0:-0,-8.43,-168	0/0:-0,-9.03,-180	0/1:-32,-7.83,-120	0/0:-0,-8.43,-168	0/0:-0,-10.24,-204	0/0:-0,-9.03,-180
chr4	41246528	T	<INS:ME:Bov-A2>	PASS	TSD=null;ASSESS=4;INTERNAL=null,null;SVTYPE=Bov-A2;SVLEN=263;MEINFO=Bov-A2,5,268,-;DIFF=0.7:n1-4,a42g,c48t,c54t,a68g,g70a,a75c,c79t,t90a,a91c,a105g,c123g,g195c,c197t,g213a,a248g,n261-269;LP=2;RP=7;RA=-1.807;PRIOR=false;SR=6	0/0:-0.01,-11.44,-218.5	0/0:-0.6,-2.41,-27.9	0/0:-0,-15.65,-312	0/0:-0.01,-2.41,-43.6	0/0:-0,-12.64,-250	0/0:-0.03,-11.44,-223.2	0/0:-0.77,-10.24,-180.9	0/0:-1.21,-7.22,-114.3	0/0:-0,-16.86,-331.6	0/0:-0.7,-6.02,-103.3	0/0:-0.62,-10.84,-194.3	0/1:-22,-4.21,-50	0/0:-0.6,-6.02,-98.6	0/0:-0.05,-14.45,-264.2	0/0:-0.61,-2.41,-30.4	0/1:-31.7,-5.42,-66.71	0/0:-0,-6.02,-120	0/0:-0.14,-4.82,-74.4	0/0:-0.66,-7.22,-127.5	0/0:-0,-6.62,-132	0/0:-0.02,-11.44,-215.7	0/0:-0,-6.02,-120	0/1:-61.4,-5.42,-32.7	1/1:-31.2,-2.41,-0.6	0/0:-0.6,-7.83,-142.6	0/0:-0,-3.01,-52	0/0:-0,-11.44,-228	0/0:-1.4,-7.83,-124.6	0/0:-0,-7.22,-139.5	0/0:-0,-7.22,-142	0/0:-0.6,-3.01,-40.6	0/0:-0.64,-11.44,-207.6	0/0:-1.64,-9.03,-129.8	0/0:-0,-8.43,-164	0/0:-1.3,-6.62,-109.3	0/0:-0.63,-4.82,-79.8	0/0:-0.81,-6.02,-85.4	0/0:-0,-7.83,-156
chr4	41341058	T	<INS:ME:Bov-A2>	PASS	TSD=CAATAAGCTTACT;ASSESS=5;INTERNAL=null,null;SVTYPE=Bov-A2;SVLEN=266;MEINFO=Bov-A2,2,268,+;DIFF=1:n1,a42g,g55a,g56t,a68g,c74t,g88t,c97t,t173c,a184g,c197t;LP=26;RP=20;RA=0.379;PRIOR=false;SR=6	0/0:-0,-15.65,-312	1/1:-299.71,-19.87,-1.81	0/0:-0,-13.85,-274	1/1:-42.6,-3.01,-0.6	0/0:-0,-9.03,-180	0/0:-0,-16.26,-322.9	0/0:-0,-15.65,-312	0/0:-0,-14.45,-286.6	0/0:-0,-21.07,-419.1	0/0:-0,-8.43,-168	0/0:-0,-13.85,-274	0/0:-0,-12.64,-252	0/0:-0,-10.84,-216	0/0:-0,-10.24,-204	0/0:-0,-7.83,-156	0/0:-0,-5.42,-108	0/0:-0,-9.63,-192	0/0:-0,-1.2,-24	0/0:-0,-21.07,-419.1	0/0:-0,-10.24,-204	0/0:-0,-16.26,-324	0/0:-0,-1.81,-36	0/0:-0,-1.81,-36	0/0:-0,-10.24,-201.8	0/0:-0,-12.64,-252	0/0:-0,-6.02,-120	0/0:-0,-13.25,-264	0/0:-0,-10.84,-216	0/0:-0,-16.26,-323.3	0/0:-0,-16.86,-336	0/0:-0,-9.63,-191.4	0/0:-0,-12.04,-238	0/0:-0,-15.05,-299.2	0/0:-0,-15.65,-312	0/0:-0,-3.61,-72	0/1:-90,-7.83,-48	0/0:-0,-9.63,-191.4	0/0:-0,-7.22,-144
chr4	44712581	C	<INS:ME:Bov-A2>	PASS	TSD=null;ASSESS=3;INTERNAL=XM_005205336.4,INTRONIC;SVTYPE=Bov-A2;SVLEN=266;MEINFO=Bov-A2,2,268,+;DIFF=1:n1,c54t,t67a,c87t,g98a,c103t,g247a,c255t;LP=11;RP=11;RA=0;PRIOR=false;SR=7	0/0:-0.6,-10.24,-192.6	0/0:-0,-7.22,-142.8	0/0:-0,-11.44,-228	0/0:-0,-9.03,-180	0/0:-0,-5.42,-108	0/0:-0,-7.83,-156	0/0:-0.03,-8.43,-163.2	0/0:-0,-6.62,-132	0/1:-48,-4.82,-44.9	0/0:-0.6,-5.42,-96.6	0/0:-0,-11.44,-227.8	0/0:-0,-7.22,-144	0/0:-0.6,-12.64,-233.3	0/0:-0.61,-5.42,-92.3	0/0:-0.6,-7.22,-132.6	0/0:-0.6,-7.22,-130.6	0/0:-0,-10.84,-216	0/0:-0.6,-6.62,-120.6	0/1:-60,-4.82,-34	0/0:-0,-5.42,-108	0/0:-0.6,-6.02,-104.1	0/0:-0,-6.62,-132	0/0:-0,-7.83,-156	0/0:-0,-11.44,-228	0/0:-0,-6.02,-120	0/0:-0,-7.22,-144	0/0:-0.6,-6.62,-120.6	0/1:-48,-6.02,-72	0/0:-1.2,-8.43,-145.2	0/0:-0,-9.03,-179.2	0/0:-0,-10.84,-216	0/0:-0,-12.04,-240	0/0:-0,-13.25,-264	0/0:-0,-10.24,-203.1	0/0:-0.6,-4.82,-84.6	0/0:-0.6,-8.43,-156.6	0/0:-0,-7.22,-144	0/0:-0,-11.44,-228
chr4	45644324	T	<INS:ME:Bov-A2>	PASS	TSD=AGACTGGAGT;ASSESS=5;INTERNAL=NM_001104984.2,INTRONIC;SVTYPE=Bov-A2;SVLEN=267;MEINFO=Bov-A2,1,268,+;DIFF=1:c54t,c74t,a91g,a92g,c111t,a118c,g200a,g216t,c230t,g241a,g247a;LP=88;RP=70;RA=0.33;PRIOR=false;SR=64	0/0:-0,-15.05,-299.5	0/0:-0,-7.83,-156	0/0:-0,-7.22,-139	0/1:-110.9,-10.24,-72	0/0:-0,-10.24,-204	0/0:-0,-9.03,-179.4	0/1:-143.1,-13.25,-96	0/0:-0,-7.22,-144	0/0:-0,-6.62,-132	0/0:-0,-5.42,-108	0/0:-0,-6.62,-127	1/1:-126.9,-8.43,-1.2	0/0:-0,-15.05,-299.6	0/0:-0,-4.82,-96	0/0:-0,-12.04,-238.6	0/0:-0,-4.21,-84	1/1:-148,-8.43,-0	0/1:-106,-10.84,-96	0/0:-0,-11.44,-224.6	1/1:-186.9,-10.84,-0	0/0:-0,-9.03,-180	0/0:-0,-5.42,-108	0/0:-0,-12.64,-252	0/1:-134.4,-10.84,-60	0/0:-0,-8.43,-168	1/1:-267.2,-16.86,-0.61	0/0:-0,-9.03,-180	0/0:-0,-10.24,-204	0/1:-112.2,-12.64,-120	0/0:-0,-7.83,-156	0/1:-140.3,-12.04,-70	0/0:-0,-8.43,-168	0/0:-0,-7.22,-144	0/0:-0,-9.03,-180	0/1:-232.9,-21.07,-144	0/0:-0,-7.83,-156	1/1:-248.6,-13.85,-0	0/0:-0,-9.63,-192
chr4	52341814	T	<INS:ME:Bov-A2>	PASS	TSD=null;ASSESS=4;INTERNAL=NM_001083739.1,INTRONIC;SVTYPE=Bov-A2;SVLEN=263;MEINFO=Bov-A2,5,268,-;DIFF=0.5:n1-4,n11,n18,n20,n52-109,g198a,t210a,t222c,t229g,n230,c240t,g242a,n247,t250g,g251a,c255a,t259a,a264g,n268-269;LP=5;RP=1;RA=2.322;PRIOR=false;SR=4	0/0:-0,-20.47,-407.5	1/1:-72.6,-4.21,-0.6	0/1:-48,-6.02,-72	0/0:-0,-4.21,-84	0/0:-0,-5.42,-108	0/0:-0.6,-7.83,-144.6	0/1:-36,-5.42,-70.4	0/0:-1.2,-13.85,-251.9	0/0:-0.6,-8.43,-156.6	0/1:-46,-4.82,-47.5	0/0:-0,-13.25,-264	0/0:-0,-9.63,-191.5	0/1:-96,-11.44,-130	0/0:-0,-17.46,-348	0/0:-0.6,-2.41,-32.8	0/0:-0.6,-1.81,-24.6	0/0:-0,-12.64,-252	0/0:-1.2,-1.2,-1.2	0/0:-0.61,-15.05,-284.4	0/0:-0,-10.24,-204	0/1:-55.1,-12.04,-180.04	0/0:-0.6,-2.41,-34.6	0/0:-0,-7.83,-156	0/0:-0,-13.85,-276	0/0:-0,-7.83,-156	0/0:-0,-9.03,-180	0/0:-1.2,-12.04,-217.2	0/0:-0.6,-4.21,-72.6	0/0:-0,-10.84,-216	0/0:-1.2,-8.43,-145.2	0/0:-0.6,-3.01,-48.4	0/1:-84,-8.43,-84	0/0:-0,-9.63,-192	0/1:-72,-12.04,-168	0/0:-0.6,-4.82,-84.6	0/0:-0,-5.42,-108	0/0:-0.6,-4.82,-84.6	0/0:-0.6,-3.01,-48.6
chr4	56502807	A	<INS:ME:Bov-A2>	PASS	TSD=dTTTTTGAGTAAACTT;ASSESS=5;INTERNAL=XM_024991058.1,INTRONIC;SVTYPE=Bov-A2;SVLEN=267;MEINFO=Bov-A2,1,268,-;DIFF=1:t33c,t50c,c63t,t81c,a92g,g95a,a100g,g104a,a118g,g150a,c197t,a223c,c255t,c258t,c263t;LP=44;RP=35;RA=0.33;PRIOR=false;SR=18	0/0:-0,-12.04,-237	1/1:-242.6,-15.05,-0.6	0/0:-0,-15.65,-312	0/1:-206,-15.65,-72	0/0:-0,-9.03,-180	0/0:-0,-7.83,-153.6	0/0:-0,-12.64,-252	0/0:-0,-11.44,-227.7	0/0:-0,-13.85,-276	0/0:-0,-6.02,-120	0/0:-0,-12.04,-236	0/1:-90,-6.62,-24	0/0:-0,-15.65,-312	0/0:-0,-6.02,-120	0/0:-0,-7.22,-144	0/0:-0,-5.42,-108	0/0:-0.6,-9.63,-180.6	0/0:-0,-4.82,-96	0/0:-0,-10.24,-204	0/0:-0,-8.43,-168	0/0:-0,-9.63,-192	0/0:-0,-4.82,-96	0/0:-0,-7.22,-144	0/1:-52,-9.03,-118	0/0:-0,-11.44,-224	1/1:-295.2,-18.66,-1.21	0/0:-0,-11.44,-228	0/0:-0,-9.63,-192	0/0:-0,-15.05,-300	0/0:-0,-14.45,-288	0/0:-0,-8.43,-168	0/0:-0,-12.04,-240	0/0:-0,-12.04,-239.7	0/0:-0,-10.84,-216	0/0:-0,-10.24,-204	0/0:-0,-9.63,-192	0/0:-0,-10.24,-204	0/0:-0,-8.43,-168
chr4	58915192	T	<INS:ME:Bov-A2>	PASS	TSD=null;ASSESS=3;INTERNAL=null,null;SVTYPE=Bov-A2;SVLEN=267;MEINFO=Bov-A2,1,268,-;DIFF=0.77:a10g,c15a,t28c,c54t,g82a,g88t,t90g,c111a;LP=3;RP=15;RA=-2.322;PRIOR=false;SR=7	0/0:-0,-13.25,-263.2	0/0:-0,-8.43,-166.9	0/0:-0,-15.05,-299.6	0/0:-0,-5.42,-108	0/0:-0,-9.03,-179.2	0/0:-0,-10.84,-213.1	0/0:-0,-11.44,-228	0/0:-0.6,-5.42,-96.6	0/0:-0,-13.85,-275.6	0/0:-0,-1.2,-24	0/0:-0,-7.83,-154.7	0/0:-0,-4.21,-82.7	0/0:-0.6,-9.63,-180.6	0/0:-0,-9.63,-190	0/0:-0,-9.03,-180	0/0:-0,-10.24,-200.5	0/0:-0,-4.82,-90.1	0/0:-0,-8.43,-166	0/0:-0,-14.45,-287.4	0/0:-0,-6.02,-112.9	0/0:-0,-7.22,-142.6	0/0:-0.6,-3.61,-60.6	0/0:-0,-8.43,-168	0/0:-0.13,-6.62,-124.2	0/0:-0,-9.03,-178.8	0/0:-0,-10.84,-214	0/0:-0.6,-8.43,-156.1	0/0:-0,-10.24,-204	0/0:-0,-9.03,-177.9	0/0:-0,-12.64,-249.7	0/0:-0,-7.83,-154	0/0:-0,-12.04,-239.3	0/0:-0,-12.04,-237.3	0/0:-0,-10.24,-203.4	0/1:-32.4,-3.01,-20.9	0/0:-0,-6.02,-118	0/0:-0,-7.22,-142	0/0:-0,-6.62,-132
chr4	61470129	G	<INS:ME:Bov-A2>	PASS	TSD=dTCGACCCCT;ASSESS=5;INTERNAL=null,null;SVTYPE=Bov-A2;SVLEN=267;MEINFO=Bov-A2,1,268,-;DIFF=0.96:c9a,c17a,a42g,c54g,g73a,g88a,t90a,g98a,c218a,t222c,c234a,n269;LP=39;RP=41;RA=-0.072;PRIOR=false;SR=16	0/0:-0,-13.85,-271.2	0/1:-40,-10.84,-163.8	0/0:-0,-14.45,-288	0/1:-31.2,-10.84,-172.03	0/0:-0,-11.44,-228	0/0:-0,-10.24,-203.8	0/0:-0,-8.43,-164.6	0/0:-0,-12.04,-233.8	0/0:-0,-15.05,-298	0/0:-0,-7.83,-156	0/0:-0,-12.04,-240	0/1:-17.6,-5.42,-61.59	0/0:-0,-12.64,-248.7	0/0:-0.6,-13.85,-259.9	0/0:-0,-9.03,-176.2	0/0:-0,-3.61,-70	0/0:-1.2,-7.83,-124.2	0/0:-0,-14.45,-288	0/0:-0,-16.86,-332.6	0/0:-0,-9.03,-178	0/0:-0,-20.47,-405.1	0/0:-0.6,-8.43,-150.2	0/1:-22,-6.02,-94	0/0:-0.6,-3.61,-52.6	0/0:-0,-10.24,-199.2	0/0:-1.2,-19.27,-344.3	0/0:-0,-9.63,-188.9	0/0:-0,-9.03,-180	0/0:-0,-11.44,-228	0/0:-0,-9.03,-180	0/1:-41.2,-10.84,-149.4	0/0:-0,-10.84,-216	0/0:-0,-10.24,-203.5	0/1:-34,-9.03,-139.5	0/0:-0,-15.65,-310	0/0:-0,-7.83,-156	0/0:-0,-13.25,-263.1	0/0:-0,-7.83,-156
chr4	71669541	G	<INS:ME:Bov-A2>	PASS	TSD=null;ASSESS=4;INTERNAL=null,null;SVTYPE=Bov-A2;SVLEN=252;MEINFO=Bov-A2,16,268,+;DIFF=0.37:n1-15,c30t,t33c,t67a,a91g,a94g,a148g,a160g,n169-178,g185a,g193t,c197t,g200a,n211-213,g231a,c266t;LP=3;RP=7;RA=-1.222;PRIOR=false;SR=4	0/0:-0,-17.46,-341.2	0/1:-42.6,-9.63,-142	0/0:-0,-9.63,-184.7	0/0:-0,-13.25,-259.7	0/0:-0,-7.83,-156	0/0:-0,-7.83,-156	0/0:-0,-10.84,-216	0/0:-0.6,-10.24,-192.6	0/0:-0,-11.44,-228	0/0:-0,-9.63,-192	0/0:-0,-19.27,-383.9	0/0:-0,-6.62,-130.8	0/0:-0,-19.87,-385.4	0/0:-0,-9.03,-180	0/0:-0,-6.62,-132	0/0:-0,-8.43,-165	0/0:-0,-7.83,-154	0/0:-0,-10.24,-203.9	0/1:-36,-12.04,-202.7	0/0:-0,-9.03,-179.7	0/0:-0,-14.45,-288	0/0:-0,-3.61,-70.7	0/0:-0,-14.45,-288	0/0:-0,-9.63,-190	0/0:-0,-7.83,-154	0/0:-0.6,-12.64,-228.3	0/0:-0,-7.22,-144	0/0:-0,-9.63,-192	0/0:-0,-8.43,-168	0/0:-0,-12.64,-252	0/0:-0,-7.83,-152.4	0/0:-0,-6.62,-132	0/0:-0,-15.05,-296.4	0/0:-0,-12.04,-239.2	0/0:-0,-10.24,-203.9	0/0:-0,-7.22,-144	0/0:-0,-6.02,-119	0/0:-0,-6.62,-130.7
chr4	82640648	A	<INS:ME:Bov-A2>	PASS	TSD=0tsd;ASSESS=5;INTERNAL=XR_003034272.1,INTRONIC;SVTYPE=Bov-A2;SVLEN=267;MEINFO=Bov-A2,1,268,-;DIFF=1:c54t,a68g,t77a,g88t,t90g,a131c,c197a,t215c,c218a,g241a,c246t,c255t;LP=70;RP=94;RA=-0.425;PRIOR=false;SR=86	0/0:-0,-9.63,-192	0/0:-0,-13.85,-276	0/0:-0,-12.04,-236	0/1:-118.6,-12.64,-108.01	0/0:-0,-13.25,-263.4	0/0:-0.01,-12.64,-247.8	0/1:-118,-12.04,-84.11	0/1:-72,-9.63,-107.5	0/0:-0,-11.44,-228	0/0:-0,-7.83,-154.6	1/1:-167,-10.84,-0.61	0/1:-92,-6.62,-24	0/0:-0,-7.83,-154	0/0:-0,-9.03,-180	0/1:-52,-8.43,-108	0/0:-0,-10.24,-204	1/1:-126,-7.22,-0	0/1:-100,-13.85,-156	0/0:-0,-19.87,-396	0/0:-0,-9.63,-192	0/1:-30,-11.44,-192	0/0:-0,-5.42,-105.3	0/1:-70.3,-10.24,-108.22	1/1:-62,-4.21,-0.6	0/1:-107.4,-10.24,-70	0/0:-0,-10.84,-214.9	0/1:-54,-9.63,-132	0/0:-0,-13.85,-276	0/0:-0,-11.44,-223.7	0/1:-69.8,-10.24,-120	1/1:-161.9,-9.63,-0	0/0:-0,-11.44,-228	0/0:-0,-11.44,-227.3	0/0:-0,-7.83,-156	0/0:-0,-12.04,-240	0/1:-44,-4.82,-48	0/1:-90,-11.44,-120	0/0:-0,-7.83,-156
chr4	86160894	A	<INS:ME:Bov-A2>	PASS	TSD=null;ASSESS=4;INTERNAL=null,null;SVTYPE=Bov-A2;SVLEN=267;MEINFO=Bov-A2,1,268,-;DIFF=0.58:g7a,c54t,a68t,c74a,a118c,t129c,t133g,c165t,g193t,c197t,g200a,g202a,n210,c218a,t222c,c230t,n242-269;LP=3;RP=6;RA=-1;PRIOR=false;SR=4	0/0:-0,-10.84,-216	0/0:-0,-9.03,-180	0/0:-0,-12.64,-252	0/0:-0,-5.42,-108	0/0:-0,-13.85,-276	0/0:-0,-7.22,-142.3	0/0:-0,-16.26,-324	0/0:-0,-14.45,-288	0/0:-0,-14.45,-288	0/1:-36,-6.62,-96	0/0:-0,-9.63,-192	0/0:-0,-7.83,-156	0/0:-0,-13.25,-260.8	0/1:-72,-12.04,-168	0/0:-0,-12.64,-250.2	0/0:-0,-8.43,-168	0/0:-0.6,-9.03,-168.6	0/0:-0,-6.62,-132	0/0:-0,-12.64,-252	0/0:-0,-7.22,-144	0/0:-0,-10.24,-204	0/0:-0,-3.01,-58	0/0:-0,-6.02,-120	0/0:-0,-13.25,-261.3	0/0:-0,-7.83,-156	0/0:-0,-6.62,-132	0/0:-0,-9.63,-192	0/0:-0,-9.03,-180	0/0:-0,-12.04,-240	0/0:-0,-13.85,-276	0/0:-0,-10.24,-204	0/0:-0,-19.27,-384	0/0:-0,-13.25,-264	0/0:-0,-10.84,-216	0/0:-0,-8.43,-168	0/1:-48,-12.64,-204	0/1:-48,-10.24,-156	0/0:-0,-9.03,-180
chr4	88053638	A	<INS:ME:Bov-A2>	PASS	TSD=null;ASSESS=4;INTERNAL=NM_174219.2,INTRONIC;SVTYPE=Bov-A2;SVLEN=267;MEINFO=Bov-A2,1,268,-;DIFF=0.99:c54a,g55a,g98a,g104t,g110t,a124t,c197t,g219a,a223c,c246t,n269;LP=5;RP=7;RA=-0.485;PRIOR=false;SR=13	0/0:-0,-16.26,-321.8	0/0:-0,-10.24,-197	0/0:-0.6,-17.46,-332.6	0/0:-0,-4.82,-96	0/0:-1.2,-16.86,-306.6	0/0:-0,-15.05,-291.1	0/1:-84,-13.25,-170.5	0/0:-0.6,-18.06,-343.4	0/0:-0.6,-15.65,-296.1	0/0:-0.6,-8.43,-156.6	0/0:-0,-19.27,-376	0/0:-1.2,-9.03,-157.2	0/0:-0,-12.04,-236.3	0/0:-0,-14.45,-279.1	0/0:-0.6,-11.44,-211.9	0/0:-0,-6.62,-130	0/0:-0,-8.43,-168	0/0:-0,-3.01,-60	0/0:-0.6,-18.06,-346.6	0/0:-0.6,-6.62,-120	0/0:-0.6,-17.46,-333.3	0/0:-0,-1.81,-36	0/0:-0.6,-1.81,-24.6	0/0:-0,-16.26,-319	0/0:-0,-5.42,-108	0/0:-0.6,-10.84,-204.6	0/0:-0,-15.65,-305.4	0/0:-0,-15.65,-301.9	0/0:-0,-12.04,-240	0/0:-0,-10.84,-211.7	0/0:-0,-7.83,-152.4	0/0:-0,-11.44,-219.4	0/0:-1.2,-15.05,-271.7	0/0:-1.2,-12.64,-226.8	0/0:-0.6,-4.82,-84.6	0/0:-1.2,-8.43,-145.2	0/0:-0,-3.61,-72	0/0:-0,-6.02,-120
chr4	91780162	G	<INS:ME:Bov-A2>	PASS	TSD=null;ASSESS=4;INTERNAL=null,null;SVTYPE=Bov-A2;SVLEN=265;MEINFO=Bov-A2,3,268,+;DIFF=0.96:n1-2,a44c,g55a,c62t,g65a,a68g,g69t,c87t,a196g,g198a,g201a,g204t,c217a,g219a,g231a,c240t,g247a,c255t;LP=11;RP=42;RA=-1.933;PRIOR=false;SR=14	0/1:-54.9,-12.04,-156.43	0/1:-236.6,-19.87,-100.5	0/0:-1.21,-10.24,-164.6	0/1:-94.4,-18.06,-238.22	0/0:-0,-9.03,-177.7	0/1:-49.5,-12.04,-155.57	0/0:-0,-11.44,-226.3	0/1:-121.38,-10.24,-45.34	0/1:-31.7,-10.84,-168.7	0/0:-0,-12.04,-239.7	0/1:-70.02,-18.06,-258.3	0/1:-40,-6.62,-84	0/1:-96.6,-9.63,-59.7	0/0:-0,-12.64,-249.6	0/1:-194,-15.05,-62	0/0:-0,-9.03,-180	0/1:-61.9,-11.44,-154	0/0:-0,-10.84,-214	0/0:-0,-10.24,-201.3	0/0:-0.6,-9.03,-168.6	0/0:-0,-12.04,-237.8	0/1:-104,-10.24,-70.8	0/0:-0,-16.26,-324	0/1:-71.9,-9.63,-90.9	0/1:-84,-12.04,-128	0/1:-80,-16.86,-226.9	0/0:-0.6,-9.03,-157.6	0/0:-0,-16.86,-335.6	0/1:-67.4,-12.04,-152.06	0/1:-35,-10.24,-152	0/1:-110.7,-9.03,-42.1	0/1:-52,-7.83,-93.7	0/0:-0,-10.84,-214	0/1:-49.9,-10.84,-148.4	0/1:-80.9,-13.85,-170	0/0:-0,-5.42,-108	0/0:-0,-7.22,-143.2	0/1:-88.3,-10.84,-96.9
chr4	101357084	G	<INS:ME:Bov-A2>	PASS	TSD=CACTTG;ASSESS=5;INTERNAL=XM_010804593.3,INTRONIC;SVTYPE=Bov-A2;SVLEN=256;MEINFO=Bov-A2,12,268,-;DIFF=0.96:n1-11,c87t,a91g,g93a,g104a,g112a,g236a;LP=234;RP=265;RA=-0.179;PRIOR=false;SR=106	0/0:-0,-17.46,-348	0/1:-132.9,-11.44,-72	0/1:-104,-11.44,-108	1/1:-296.6,-18.06,-0.6	0/0:-0,-7.83,-155.3	1/1:-261.2,-16.26,-1.21	0/1:-200,-18.06,-132	0/1:-148,-14.45,-120	0/1:-224,-19.87,-131.4	0/1:-156,-13.85,-94	1/1:-242.6,-15.05,-0.6	0/1:-72,-10.24,-120	1/1:-385.2,-23.48,-1.21	0/1:-176,-12.04,-36	1/1:-283.6,-17.46,-0.6	1/1:-114.6,-7.22,-0.6	0/1:-164,-11.44,-36	0/1:-140,-13.85,-108	0/1:-166,-17.46,-156	0/0:-0,-7.83,-156	0/1:-116,-14.45,-156	1/1:-160.6,-10.24,-0.6	0/0:-0,-10.24,-204	1/1:-173.5,-11.44,-1.2	0/1:-52,-10.24,-142	0/1:-104,-13.85,-156	0/1:-94,-10.84,-108	0/1:-148,-13.85,-108	1/1:-352.6,-21.07,-0.6	0/0:-0,-15.65,-312	1/1:-185.2,-12.04,-1.2	0/1:-94,-11.44,-120	0/1:-104,-13.25,-144	0/1:-161.5,-15.65,-128.8	0/1:-110,-15.05,-168	0/1:-84,-10.24,-108	1/1:-290.1,-17.46,-0.6	0/1:-74,-8.43,-84
chr4	101951835	G	<INS:ME:Bov-A2>	PASS	TSD=TG;ASSESS=5;INTERNAL=null,null;SVTYPE=Bov-A2;SVLEN=267;MEINFO=Bov-A2,1,268,+;DIFF=0.43:g8a,c9a,c17a,a42g,n47-86,t90a,c111t,c130a,c132g,g151a,g172a,t173c,n192-269;LP=7;RP=1;RA=2.807;PRIOR=false;SR=9	0/1:-36,-12.64,-207.7	0/1:-38.51,-14.45,-181.7	0/0:-0,-14.45,-288	0/0:-0.6,-4.82,-84.6	0/0:-0,-16.86,-336	0/0:-0,-11.44,-228	0/0:-0,-15.05,-293.7	0/0:-1.2,-13.25,-236	0/0:-1.81,-18.06,-317.41	0/0:-0,-7.83,-144.3	0/0:-0,-13.85,-272.2	0/0:-1,-7.22,-91	0/0:-0.6,-13.85,-249.5	0/0:-0,-12.64,-252	0/0:-0,-7.83,-156	0/0:-0,-3.61,-72	0/1:-46,-7.83,-101.4	0/0:-0,-6.62,-132	0/0:-0,-9.03,-180	0/0:-0,-7.83,-156	0/1:-47.7,-12.64,-201.5	0/0:-0,-6.02,-119	0/0:-0,-6.02,-118	0/1:-17.57,-6.62,-67.9	0/0:-0.75,-8.43,-137.5	0/1:-28.7,-10.24,-160.3	0/0:-0,-12.64,-248.2	0/0:-0,-7.83,-156	0/0:-0,-10.24,-196.8	0/0:-0,-14.45,-288	0/0:-0.01,-7.22,-133.2	0/0:-0,-16.86,-328.4	0/0:-0,-15.65,-312	0/0:-0,-10.84,-216	0/0:-0,-10.24,-202.2	0/0:-0.01,-8.43,-143.2	0/0:-0.6,-11.44,-212.5	0/0:-0,-7.22,-144
chr4	105135895	T	<INS:ME:Bov-A2>	PASS	TSD=AT;ASSESS=5;INTERNAL=XM_002687005.2,PROMOTER;SVTYPE=Bov-A2;SVLEN=267;MEINFO=Bov-A2,1,268,+;DIFF=1:g55a,c103t,i120tttcact,t142c,a186c,g198a,g241a,g247t,g265a;LP=16;RP=23;RA=-0.524;PRIOR=false;SR=9	0/0:-0,-19.87,-396	0/1:-115.3,-16.26,-189.1	0/0:-0,-16.86,-336	0/0:-0,-6.02,-120	0/0:-0,-7.22,-144	0/0:-0,-11.44,-228	0/0:-0,-12.64,-252	0/0:-0,-10.84,-214	0/0:-0,-7.22,-144	0/0:-0,-10.84,-215	0/0:-0,-16.86,-336	0/0:-0,-10.24,-204	0/0:-0,-18.66,-372	0/0:-0,-13.25,-264	0/0:-0,-10.84,-216	0/0:-0,-6.02,-120	0/1:-84,-18.06,-264	0/0:-0,-3.01,-60	0/0:-0,-10.84,-214	0/0:-0,-10.84,-216	0/0:-0,-14.45,-288	0/0:-0,-5.42,-108	0/0:-0,-6.62,-132	0/0:-0,-9.03,-180	0/0:-0,-12.64,-252	0/1:-201.7,-20.47,-168	0/0:-0,-9.03,-178	0/0:-0,-10.24,-204	0/0:-0,-18.06,-360	0/0:-0,-11.44,-228	0/0:-0,-8.43,-168	0/0:-0,-10.84,-216	0/0:-0,-14.45,-288	0/0:-0,-11.44,-228	0/0:-0,-13.25,-264	0/0:-0,-9.03,-180	0/0:-0,-9.63,-192	0/0:-0,-6.62,-132
chr4	105296562	T	<INS:ME:Bov-A2>	PASS	TSD=null;ASSESS=4;INTERNAL=XM_005205921.4,INTRONIC;SVTYPE=Bov-A2;SVLEN=256;MEINFO=Bov-A2,12,268,-;DIFF=0.9:n1-11,a26g,a29g,c30t,a68g,a75c,g76a,t90a,g110a,g231t,a233g,c234a,t239c,g241a,g256a,a264t;LP=34;RP=49;RA=-0.527;PRIOR=false;SR=19	0/0:-0,-21.67,-422	0/0:-0,-10.84,-214	0/0:-0.01,-15.65,-302.4	0/1:-36,-9.63,-153.9	0/0:-1.93,-15.05,-252.61	0/0:-0,-15.65,-309.2	0/0:-0,-15.05,-291.6	0/0:-0,-9.63,-188.8	0/1:-46.7,-19.27,-326.9	0/0:-0,-4.21,-82	0/0:-0,-12.64,-247.7	0/0:-0,-10.24,-201.1	0/0:-0,-17.46,-341.1	0/1:-60,-19.27,-321.8	0/0:-0,-7.83,-150.6	0/0:-0.61,-7.83,-136.4	0/0:-0,-11.44,-226.5	0/0:-0,-6.62,-131	0/0:-0,-12.64,-244.7	0/1:-48,-12.04,-181.6	0/0:-0,-10.24,-204	0/0:-0,-3.01,-60	0/0:-0,-6.02,-120	0/0:-0,-10.24,-203.1	0/0:-0,-11.44,-224	0/0:-0,-15.05,-298	0/0:-1.21,-18.66,-343.6	0/0:-0.6,-12.64,-235.9	0/0:-0,-11.44,-220.2	0/0:-0,-16.26,-319.7	0/0:-0,-10.84,-212	0/0:-1.81,-19.87,-349.01	0/0:-0,-7.83,-151.6	0/0:-0,-9.63,-192	0/0:-0,-10.84,-214	0/0:-0,-7.83,-152.3	0/0:-0,-7.22,-143	0/0:-0,-3.01,-58.7
chr4	105568915	T	<INS:ME:Bov-A2>	PASS	TSD=null;ASSESS=3;INTERNAL=null,null;SVTYPE=Bov-A2;SVLEN=257;MEINFO=Bov-A2,11,268,-;DIFF=0.43:n1-10,c17a,a42g,c54t,g55a,g59a,g66a,g69a,g73a,t90a,n129-269;LP=41;RP=283;RA=-2.787;PRIOR=false;SR=51	0/0:-1.2,-13.85,-253.2	0/1:-110,-15.05,-180	0/1:-36,-12.04,-204	0/1:-102,-19.87,-288	0/1:-56,-13.25,-204	0/1:-58,-17.46,-288	0/1:-78,-20.47,-324	0/0:-1.2,-9.63,-169.2	0/1:-72,-7.83,-84	0/1:-162,-19.27,-204	0/1:-84,-15.65,-227.9	0/1:-68,-7.83,-84	0/1:-106,-22.28,-324	0/0:-0.6,-15.05,-288.6	0/1:-54,-11.44,-168	0/1:-36,-3.61,-36	0/0:-0,-12.64,-252	0/0:-1.81,-13.85,-241.81	0/1:-56,-14.45,-228	0/1:-96,-15.65,-216	0/0:-0.6,-19.27,-371.1	0/1:-78,-11.44,-144	0/1:-92,-16.86,-240	0/1:-74,-7.83,-70	0/1:-102,-13.25,-156	0/1:-104,-18.66,-252	0/1:-142,-18.06,-216	0/1:-58,-15.05,-239.7	0/1:-80,-13.85,-192	0/1:-24,-6.62,-108	0/1:-92,-18.06,-252	0/1:-80,-15.65,-228	0/0:-0.6,-11.44,-214.8	0/1:-48,-15.65,-264	0/1:-130,-18.66,-240	0/0:-1.2,-9.03,-157.2	0/1:-128,-19.27,-252	0/1:-70,-11.44,-156
chr4	105580933	T	<INS:ME:Bov-A2>	PASS	TSD=null;ASSESS=3;INTERNAL=XM_010804710.3,PROMOTER;SVTYPE=Bov-A2;SVLEN=267;MEINFO=Bov-A2,1,268,-;DIFF=0.64:c17a,a53g,c71t,a94g,c103a,a141c,n174-269;LP=201;RP=186;RA=0.112;PRIOR=false;SR=10	0/1:-206,-30.1,-360	0/1:-272,-32.51,-324	0/1:-186.8,-36.12,-502.5	0/1:-120,-23.48,-336	0/1:-134,-34.92,-540	0/0:-0,-31.31,-624	0/0:-2.41,-28.9,-527.41	0/0:-0,-31.91,-632.9	0/0:-0.03,-33.11,-655.2	0/0:-0,-21.07,-420	0/0:-3.01,-34.92,-637.31	0/1:-212,-37.93,-504	0/0:-1.81,-34.92,-661.81	0/0:-0,-30.71,-612	0/0:-0,-27.69,-550	0/1:-112,-21.67,-300	0/1:-172,-18.66,-177.6	0/0:-0,-14.45,-288	0/1:-114,-32.51,-516	0/1:-126,-19.27,-240	0/1:-204,-28.3,-324	0/0:-0,-13.85,-276	0/0:-0,-21.67,-432	0/1:-163.8,-16.86,-140.4	0/1:-434,-39.13,-264	0/1:-272,-41.54,-504	0/0:-3.01,-37.93,-688.31	0/0:-0,-27.69,-552	0/1:-126,-46.96,-792	0/0:-0,-33.11,-660	0/1:-272,-28.3,-238	0/1:-161.7,-32.51,-466.6	0/1:-156,-23.48,-288	0/0:-2.41,-38.53,-719.21	0/0:-0,-27.09,-540	0/1:-147.8,-28.9,-408	0/1:-215.1,-24.08,-228	0/1:-188,-24.08,-263.8
chr4	105702485	C	<INS:ME:Bov-A2>	PASS	TSD=null;ASSESS=3;INTERNAL=XM_024991203.1,PROMOTER;SVTYPE=Bov-A2;SVLEN=267;MEINFO=Bov-A2,1,268,+;DIFF=0.93:n2,a29g,c30t,t50g,g52a,c54t,a57g,t67a,g82a,t90a,a91c,g98a,g112a,t138c,g185a,c197t,g204a,c240t;LP=106;RP=13;RA=3.027;PRIOR=false;SR=84	0/0:-1.31,-18.66,-298.8	0/0:-3.34,-28.9,-408.61	0/0:-0.02,-13.25,-227.6	0/0:-0.63,-21.67,-359.8	0/0:-0.72,-19.27,-318.4	0/0:-0.69,-15.65,-280.6	0/0:-0.61,-12.64,-219.1	0/0:-0.82,-19.87,-316.4	0/0:-1.28,-21.07,-339	0/0:-0.82,-12.04,-197.4	0/0:-2.3,-17.46,-238.1	0/0:-2.34,-8.43,-99.5	0/0:-1.34,-18.06,-282	0/0:-0.9,-13.85,-239.7	0/0:-2.2,-14.45,-191.1	0/0:-0.01,-6.62,-119.5	0/0:-0.61,-13.25,-234.5	0/0:-2.12,-12.04,-187.2	0/0:-0.73,-23.48,-393.6	0/0:-0.59,-14.45,-244.1	0/0:-0.67,-17.46,-282.4	0/0:-2.01,-19.87,-284.8	0/0:-1.54,-18.66,-313.2	0/0:-3.14,-19.87,-272.5	0/0:-1.59,-19.87,-280.6	0/0:-2.96,-25.29,-377.11	0/0:-0.6,-18.06,-318.7	0/0:-2.8,-15.65,-221.4	0/0:-1.72,-13.25,-184.8	0/0:-0.8,-18.66,-319.4	0/1:-51.4,-23.48,-340.13	0/0:-0.93,-19.87,-333.2	0/0:-0.13,-17.46,-294.9	0/0:-0.62,-15.05,-244.5	0/1:-84.19,-23.48,-304.73	0/0:-1.26,-13.25,-224.2	0/0:-0.76,-18.06,-290	0/0:-0,-6.02,-110.6
chr4	106033036	T	<INS:ME:Bov-A2>	PASS	TSD=ACAGGCTCTT;ASSESS=5;INTERNAL=NM_001080904.1,INTRONIC;SVTYPE=Bov-A2;SVLEN=258;MEINFO=Bov-A2,10,268,-;DIFF=0.95:n1-9,c17t,g35a,c37t,a49g,c54t,g65a,a75c,g84a,g98a,g112a,g139a,g209t,g219a,c255t,n268-269;LP=33;RP=30;RA=0.138;PRIOR=false;SR=47	0/0:-0,-14.45,-288	0/0:-0,-11.44,-228	0/0:-0,-8.43,-168	0/0:-0,-7.83,-156	0/0:-0,-11.44,-228	0/0:-0,-14.45,-286	0/0:-0,-12.04,-237.3	0/0:-0,-13.85,-276	0/1:-144,-13.25,-96	0/1:-92,-9.03,-70	0/0:-0,-12.04,-240	0/0:-0,-11.44,-228	0/0:-0,-8.43,-168	0/0:-0.6,-7.22,-132.6	0/0:-0,-8.43,-168	0/0:-0,-5.42,-108	0/0:-0,-12.64,-252	0/0:-0,-11.44,-228	0/1:-192,-20.47,-187.4	0/0:-0,-6.62,-132	0/1:-105.3,-12.64,-132	0/1:-86,-6.62,-30	0/0:-0,-10.24,-204	0/0:-0,-10.84,-216	0/0:-0,-7.83,-156	0/0:-0,-15.05,-300	0/0:-0,-12.04,-240	0/0:-0,-9.03,-180	0/0:-0,-13.25,-264	0/1:-86,-11.44,-132	0/0:-0,-12.04,-240	0/0:-0,-15.05,-300	0/0:-0,-14.45,-288	0/1:-104,-11.44,-108	0/0:-0,-12.64,-252	0/1:-168,-13.85,-84	0/0:-0,-12.04,-240	0/0:-0,-4.82,-96
chr4	110260140	T	<INS:ME:Bov-A2>	PASS	TSD=ATGCAACTCTCT;ASSESS=5;INTERNAL=XM_024991213.1,INTRONIC;SVTYPE=Bov-A2;SVLEN=267;MEINFO=Bov-A2,1,268,+;DIFF=0.99:c32t,g39a,c54t,a68g,t77a,a80g,g82t,g88a,c89a,n91,d97-100,n102-103,a118t,c123t,a223g,c240t,g251a,c255t,t259g,t260c,n268-269;LP=167;RP=144;RA=0.214;PRIOR=false;SR=64	0/1:-64,-13.85,-196.6	0/1:-80.03,-15.05,-183	0/0:-0,-13.25,-260.8	0/1:-96,-12.04,-122	0/0:-0,-8.43,-167.6	0/1:-50.5,-13.25,-192.4	0/0:-0,-15.05,-298.2	0/1:-39.1,-7.83,-103.9	0/1:-84,-9.03,-78	0/0:-0,-9.03,-180	0/1:-113,-15.65,-176	0/1:-44.01,-6.62,-72.1	0/1:-143.6,-14.45,-112	0/0:-0,-14.45,-288	0/1:-54,-11.44,-166	0/1:-72.03,-7.22,-43.3	0/0:-0,-8.43,-168	0/0:-0,-5.42,-108	0/1:-42,-9.63,-139.3	0/1:-42,-10.84,-164	0/1:-91.5,-17.46,-226	0/1:-42.05,-7.22,-65.5	0/0:-0,-9.63,-192	0/0:-1.2,-12.64,-221.6	0/0:-0,-12.04,-238	0/1:-30.01,-12.64,-185	0/1:-94,-11.44,-117.5	0/1:-123.2,-12.04,-63.73	0/1:-166.9,-16.86,-122.3	0/1:-115.4,-12.64,-105.2	0/0:-0,-10.24,-204	0/0:-0,-9.63,-188.5	0/1:-104,-10.24,-69.8	0/0:-0,-9.63,-192	0/0:-0,-10.24,-204	0/0:-0,-8.43,-168	0/1:-82,-10.24,-106	0/0:-0,-7.83,-156
chr4	111041178	C	<INS:ME:Bov-A2>	PASS	TSD=null;ASSESS=3;INTERNAL=XM_024991213.1,INTRONIC;SVTYPE=Bov-A2;SVLEN=269;MEINFO=Bov-A2,0,269,-;DIFF=1:a11t,c54t,c97t,g139t,c179t,c191t,a192g,g198t,g231a,g241a,a252c,n269;LP=27;RP=15;RA=0.848;PRIOR=false;SR=8	0/0:-0,-12.64,-250	0/0:-0,-13.25,-264	0/0:-0,-12.04,-239.3	0/1:-78.32,-7.22,-41.31	0/1:-97.37,-13.25,-121.22	0/0:-0,-14.45,-286	0/0:-0,-12.04,-234	0/1:-76,-13.85,-182.7	0/0:-0,-18.66,-371.5	0/0:-0,-7.83,-156	0/0:-0,-13.85,-276	0/1:-50.32,-5.42,-38.9	0/0:-0,-10.24,-199.8	0/0:-0,-6.62,-130	0/0:-0,-10.84,-216	0/0:-0,-9.03,-180	0/0:-0,-6.62,-132	0/0:-0,-6.62,-132	0/0:-0,-15.05,-297.9	0/0:-0.01,-4.82,-91.8	0/0:-0,-15.65,-312	0/0:-0,-3.01,-60	0/1:-54.13,-11.44,-135.72	0/0:-0,-10.84,-215.6	0/0:-0,-7.83,-156	0/0:-0,-7.22,-142.9	0/0:-0,-10.84,-216	0/0:-0,-14.45,-286	0/0:-0,-11.44,-224	0/0:-0,-7.83,-156	0/0:-0,-13.25,-264	0/0:-0,-13.25,-260.9	0/0:-0,-9.03,-178	0/0:-0,-10.24,-204	0/0:-0,-7.83,-156	0/0:-0,-6.62,-132	0/0:-0,-9.03,-180	0/0:-0,-4.82,-96
chr4	111646661	C	<INS:ME:Bov-A2>	PASS	TSD=GTATTCTTGCCTGGTAAATCCC;ASSESS=5;INTERNAL=XM_024991213.1,INTRONIC;SVTYPE=Bov-A2;SVLEN=267;MEINFO=Bov-A2,1,268,-;DIFF=0.54:c9a,c15t,c17a,a26c,c30t,t67c,g73a,g82a,g88a,t90a,n98-145,g172a,g185a,g193t,c197t,g198a,g200a,c205t,g216a,c218a,g231a,a233t,c234a,g241a;LP=31;RP=32;RA=-0.046;PRIOR=false;SR=44	0/0:-0,-12.04,-240	0/0:-0.16,-9.03,-157.6	0/0:-0,-4.21,-79.5	0/0:-0,-8.43,-156.7	0/0:-0,-9.63,-190.5	0/0:-0,-9.03,-168	0/0:-0,-13.25,-248.4	0/0:-0,-12.04,-240	0/0:-0,-10.84,-216	0/0:-0,-8.43,-166	0/0:-0.6,-8.43,-148.5	0/0:-0,-2.41,-39.6	0/0:-0,-10.24,-204	0/0:-0,-13.25,-264	0/0:-0.6,-5.42,-92.6	0/0:-0,-4.21,-84	0/0:-0,-8.43,-168	0/0:-0.04,-9.03,-166.1	0/0:-0,-10.24,-204	0/0:-0,-6.02,-120	0/0:-0,-12.04,-238	0/0:-0,-1.2,-18.8	0/0:-0,-10.84,-209.4	0/0:-0.64,-3.61,-45.6	0/1:-20.06,-6.62,-91.5	0/1:-40.02,-10.24,-141.6	0/0:-0,-8.43,-154.1	0/0:-0,-6.62,-132	0/0:-0,-9.63,-187.9	0/0:-0,-10.24,-204	0/0:-0.63,-10.84,-178.5	0/0:-0,-7.22,-130.3	0/0:-0,-8.43,-162.3	0/0:-0,-15.05,-300	0/0:-0,-13.85,-274	0/0:-0,-10.24,-204	0/0:-0,-9.03,-180	0/0:-0,-6.02,-120
chr4	113189018	T	<INS:ME:Bov-A2>	PASS	TSD=null;ASSESS=3;INTERNAL=XM_024991247.1,INTRONIC;SVTYPE=Bov-A2;SVLEN=267;MEINFO=Bov-A2,1,268,+;DIFF=1:c9a,c17a,c46t,g55a,g95t,g98a,c101a,g110a,a113t,t129a,a153c,c179g,g199t,c218a,g254a;LP=70;RP=359;RA=-2.359;PRIOR=false;SR=135	0/1:-144.44,-33.11,-358.49	0/0:-0,-6.62,-131	0/0:-1.62,-41.54,-710.5	0/1:-173.77,-27.69,-228.63	0/1:-68.88,-26.49,-396.4	0/0:-0,-9.03,-180	0/1:-250.32,-48.77,-502.12	0/1:-64.58,-33.72,-485.62	0/0:-0,-16.26,-322.6	0/1:-101.06,-37.93,-570.07	0/0:-0,-10.24,-202.9	0/1:-356.4,-160.15,-2300.96	0/1:-229.29,-49.97,-569.32	0/0:-0,-7.83,-156	0/1:-258.13,-82.48,-1169.69	0/0:-0,-4.21,-84	0/1:-158.41,-27.69,-279.53	0/1:-52.6,-14.45,-207.23	0/0:-0,-13.85,-276	0/1:-118.6,-20.47,-221.38	0/0:-0,-7.22,-142.1	0/1:-92.78,-43.35,-677.1	0/1:-148.32,-25.89,-267.92	0/0:-4.1,-36.73,-576.81	0/1:-94.11,-36.73,-540.46	0/0:-0,-6.62,-126	0/1:-111.57,-31.91,-404.73	0/1:-193.98,-57.2,-727.79	0/0:-0,-10.84,-214.2	0/0:-0,-3.61,-72	0/1:-109.47,-30.71,-436.8	0/1:-126.44,-30.1,-385.71	0/0:-0.6,-11.44,-216.6	0/1:-111.89,-34.92,-452.91	0/1:-91.77,-27.69,-382.83	0/1:-59.62,-16.86,-210.37	0/1:-151.43,-31.31,-366.08	0/0:-0,-8.43,-168
chr4	113191862	C	<INS:ME:Bov-A2>	PASS	TSD=dAACTTTTTAC;ASSESS=5;INTERNAL=XM_024991247.1,INTRONIC;SVTYPE=Bov-A2;SVLEN=267;MEINFO=Bov-A2,1,268,+;DIFF=1:c54t,g88a,t90a,c103t,g202a,g219a,a223g;LP=931;RP=270;RA=1.786;PRIOR=false;SR=85	0/0:-2.06,-21.67,-290.6	0/0:-0,-6.62,-132	0/0:-1.98,-34.92,-596.3	0/0:-0.66,-12.04,-191.1	0/0:-2.17,-26.49,-461.1	0/0:-0,-8.43,-168	0/0:-4.34,-40.94,-590.81	0/0:-2.46,-36.12,-582.01	0/0:-0,-15.65,-312	0/1:-57.5,-25.89,-369.28	0/0:-0,-18.06,-359.5	0/1:-268.05,-108.97,-1113.06	0/1:-52.37,-22.28,-317.23	0/0:-0,-9.63,-192	0/1:-199.85,-53.58,-542.99	0/0:-0,-5.42,-108	0/0:-0.14,-16.86,-295.1	0/0:-0,-7.22,-140.3	0/0:-0,-18.06,-351.8	0/0:-0.61,-21.67,-389.1	0/0:-0.6,-10.84,-204.6	0/0:-3.07,-21.07,-270.41	0/0:-0,-7.22,-134	0/0:-2.31,-27.09,-426.61	0/1:-119.15,-31.31,-319.05	0/0:-0,-10.84,-216	0/1:-98.52,-31.31,-383.94	0/0:-2.32,-37.93,-560.8	0/0:-0,-12.64,-252	0/0:-0,-7.83,-156	0/1:-112.24,-28.9,-326.27	0/0:-1.25,-24.08,-405	0/0:-0,-16.26,-324	0/0:-1.22,-29.5,-492.1	0/0:-0,-9.03,-153.9	0/0:-0.61,-16.26,-289.7	0/0:-2.44,-29.5,-455.61	0/0:-0,-8.43,-168
chr4	113261698	T	<INS:ME:Bov-A2>	PASS	TSD=dTGTTTTTTTTTAATGTTTCAGA;ASSESS=5;INTERNAL=XM_024991239.1,TERMINATOR;SVTYPE=Bov-A2;SVLEN=267;MEINFO=Bov-A2,1,268,+;DIFF=0.39:c9a,c17a,c18t,a21t,a26g,c32a,n54-142,g172a,t173c,c179t,g193t,c197t,g200a,c214t,g216a,c218a,t222c,g231a,c234a,g241a,n247-269;LP=11;RP=40;RA=-1.862;PRIOR=false;SR=22	0/0:-1.95,-39.74,-652.31	0/0:-0,-7.83,-156	0/0:-4.97,-34.92,-502.71	0/0:-1.94,-27.09,-415.11	0/0:-1.81,-29.5,-447.7	0/0:-0,-9.63,-184	0/1:-102.51,-61.41,-829.84	0/1:-102.34,-39.13,-547.08	0/0:-0.6,-12.04,-224.2	0/0:-1.72,-24.68,-377.6	0/0:-0,-14.45,-287.7	0/0:-10.73,-99.94,-1435.63	0/0:-3.4,-35.52,-494.81	0/0:-0,-7.83,-152	0/0:-3.63,-49.97,-735.31	0/0:-0,-3.61,-70	0/0:-1.82,-27.69,-427.91	0/0:-1.61,-18.66,-283.1	0/0:-0.6,-9.63,-178.6	0/0:-1.64,-24.68,-400.6	0/0:-0.6,-16.26,-301.2	0/0:-0.84,-18.66,-269.8	0/0:-2.85,-21.67,-317.61	0/0:-3.66,-36.73,-574.01	0/0:-5.71,-34.32,-441.01	0/0:-0,-10.84,-213.5	0/0:-2.62,-42.75,-691.41	0/0:-6.23,-61.41,-906.12	0/0:-0,-15.65,-305.7	0/0:-0,-19.87,-385.6	0/0:-1.85,-25.29,-391.6	0/0:-5.18,-42.14,-587.11	0/0:-0,-12.04,-227.8	0/0:-2.12,-32.51,-507.91	0/0:-0.6,-15.05,-260.2	0/0:-1.98,-24.68,-368	0/1:-115.94,-42.75,-510.58	0/0:-0,-5.42,-106
chr4	113318725	A	<INS:ME:Bov-A2>	PASS	TSD=null;ASSESS=4;INTERNAL=XM_010804674.2,TERMINATOR;SVTYPE=Bov-A2;SVLEN=267;MEINFO=Bov-A2,1,268,+;DIFF=0.42:c9a,g14a,c17a,t23c,c30t,g55a,g59a,a68g,g73a,c74t,c87t,t90a,c123g,t135g,c165t,g198a,g208t,g211a,n220-269;LP=2;RP=10;RA=-2.322;PRIOR=false;SR=12	0/0:-2.53,-33.11,-605.01	0/0:-0,-10.24,-202.5	0/0:-0,-18.66,-365.2	0/0:-0,-40.94,-808.9	0/0:-0,-19.87,-387	0/0:-0,-7.83,-155.8	0/0:-0.6,-46.36,-896.7	0/0:-0,-27.09,-539.2	0/0:-0,-10.24,-202	0/0:-2.41,-29.5,-536.11	0/0:-0,-12.64,-251.6	0/0:-4.22,-81.88,-1544.01	0/0:-0.6,-40.94,-767.2	0/0:-0,-13.25,-262	0/0:-3.62,-55.99,-1038.21	0/0:-0,-4.82,-96	0/0:-0,-24.68,-489.8	0/0:-0,-30.71,-609.1	0/0:-0,-16.26,-324	0/0:-0,-27.69,-551.8	0/0:-0.01,-8.43,-161.2	0/1:-78.9,-34.92,-605	0/0:-0,-39.74,-782.5	0/0:-1.2,-25.29,-476.2	0/0:-3.01,-54.19,-1014.71	0/0:-0,-9.03,-180	0/0:-1.81,-27.09,-502.51	0/0:-1.82,-40.94,-773.61	0/0:-0,-9.03,-180	0/0:-0,-9.63,-192	0/0:-0.6,-40.34,-789.7	0/0:-2.41,-37.93,-706.21	0/0:-0,-10.84,-214	0/0:-0,-26.49,-523.8	0/0:-0.6,-32.51,-634	0/0:-0.01,-17.46,-343.8	0/0:-0,-38.53,-766.8	0/0:-0,-7.83,-156
chr5	938469	T	<INS:ME:Bov-A2>	PASS	TSD=AGATTTTGTGTTTCT;ASSESS=5;INTERNAL=null,null;SVTYPE=Bov-A2;SVLEN=268;MEINFO=Bov-A2,1,269,-;DIFF=0.48:c9a,c46t,g55t,g70a,g73a,g88a,t90a,c111t,n130-269;LP=1;RP=6;RA=-2.585;PRIOR=false;SR=9	0/0:-0,-14.45,-288	0/0:-0,-10.84,-216	0/0:-0,-15.05,-300	0/0:-0,-7.22,-144	0/0:-0,-13.25,-264	0/0:-0,-15.05,-300	0/0:-0,-16.86,-336	0/0:-0,-10.24,-204	0/0:-0,-21.07,-420	0/0:-0,-8.43,-168	0/0:-0,-13.85,-276	0/0:-0,-10.84,-216	0/0:-0.6,-19.87,-384.6	0/0:-0,-13.85,-276	0/0:-0,-15.05,-300	0/0:-0,-6.62,-132	0/0:-0,-9.03,-180	0/0:-0,-5.42,-108	0/0:-0,-14.45,-288	0/0:-0,-10.24,-204	0/0:-0,-21.07,-419.8	0/0:-0,-4.82,-96	0/0:-0,-3.01,-60	0/0:-0,-9.03,-180	0/0:-0,-4.82,-96	0/0:-0,-7.83,-156	0/0:-0,-21.07,-420	0/0:-0,-11.44,-228	0/0:-0,-15.65,-312	0/0:-0,-12.04,-240	0/0:-0,-10.24,-204	0/0:-0,-12.04,-240	0/0:-0,-7.22,-144	0/0:-0,-11.44,-228	0/0:-0,-6.62,-132	0/1:-34,-7.22,-108	0/0:-0,-7.22,-144	0/0:-0,-2.41,-48
chr5	6108044	A	<INS:ME:Bov-A2>	PASS	TSD=AGTATCATTATTTTTA;ASSESS=5;INTERNAL=null,null;SVTYPE=Bov-A2;SVLEN=269;MEINFO=Bov-A2,0,269,-;DIFF=0.81:t28c,c54t,g56a,t67a,t81c,g84a,a91g,a94g,c97t,n247,c255t,n268-269;LP=2;RP=7;RA=-1.807;PRIOR=false;SR=6	0/0:-0.13,-10.84,-210.6	0/0:-0,-10.84,-214.2	0/0:-0,-10.84,-214	0/0:-0,-12.64,-252	0/0:-0,-13.25,-259.6	0/0:-0,-6.62,-132	0/0:-0,-9.63,-190	0/0:-0,-6.62,-132	0/0:-0,-15.65,-310.2	0/0:-0,-6.02,-118	0/0:-0,-10.24,-202	0/0:-0,-3.01,-60	0/0:-0,-21.07,-416	0/0:-0,-9.63,-192	0/0:-0,-10.84,-210.2	0/0:-0,-6.02,-120	0/0:-0,-4.82,-96	0/0:-0,-12.04,-240	0/0:-0,-9.03,-180	0/0:-0,-10.84,-216	0/0:-0,-11.44,-228	0/0:-0,-6.62,-125.8	0/0:-0,-10.84,-216	0/0:-0,-5.42,-108	0/0:-0,-9.03,-180	0/0:-0.6,-7.83,-144.6	0/0:-0,-14.45,-288	0/0:-0,-9.63,-192	0/0:-0,-12.04,-240	0/0:-0,-7.83,-156	0/0:-0,-11.44,-225.5	0/0:-0,-14.45,-287.3	0/0:-0,-10.24,-204	0/0:-0,-8.43,-165.8	0/0:-0,-7.22,-144	0/0:-0,-6.02,-119.2	0/1:-83.1,-13.25,-168	0/0:-0,-5.42,-108
chr5	6413902	T	<INS:ME:Bov-A2>	PASS	TSD=AACTTTGAACAAT;ASSESS=5;INTERNAL=null,null;SVTYPE=Bov-A2;SVLEN=267;MEINFO=Bov-A2,1,268,+;DIFF=1:g98a,c103t,g108a,a118c,c240t;LP=49;RP=62;RA=-0.339;PRIOR=false;SR=10	0/0:-0,-10.84,-215.9	0/0:-1.21,-10.84,-171	0/0:-0,-16.86,-335.4	0/0:-0,-10.84,-216	0/1:-183.2,-13.25,-40	0/0:-0,-12.04,-240	0/0:-0,-16.26,-323.1	0/0:-0,-9.03,-180	0/0:-0,-12.64,-252	0/0:-0,-10.84,-216	0/0:-0,-16.26,-319.6	0/0:-0,-13.85,-276	0/0:-0,-10.84,-213.2	0/0:-0,-12.04,-233.4	0/0:-0,-9.03,-176	0/0:-0,-3.61,-72	0/0:-0,-9.03,-180	0/0:-0,-7.22,-144	0/0:-0,-14.45,-285.6	0/0:-0,-7.22,-144	0/0:-0,-13.25,-263.8	0/0:-0,-4.82,-94.6	0/0:-0,-6.02,-120	0/1:-112.33,-12.64,-100.7	0/0:-0,-7.83,-156	0/1:-108,-13.85,-130	0/0:-0,-9.03,-180	0/0:-0,-6.62,-132	0/0:-0,-15.65,-307	0/0:-0,-10.84,-216	0/1:-70,-13.25,-170	0/0:-0,-13.25,-262.6	0/0:-0,-11.44,-226.2	0/0:-0,-10.84,-216	0/0:-0,-5.42,-108	0/0:-0,-6.62,-130.2	0/1:-196,-13.25,-30	0/0:-0,-6.62,-132
chr5	8619638	T	<INS:ME:Bov-A2>	PASS	TSD=TT;ASSESS=5;INTERNAL=NM_174192.3,INTRONIC;SVTYPE=Bov-A2;SVLEN=267;MEINFO=Bov-A2,1,268,+;DIFF=0.57:a10g,n15-16,n18-20,c25t,t33a,n39,c48t,g55a,g58t,g66t,t67a,c101t,c106t,c117t,a118c,c119t,g157a,g204a,c206t,g219a,c246t,c255t;LP=1;RP=5;RA=-2.322;PRIOR=false;SR=6	0/0:-0,-7.83,-154	0/0:-0,-11.44,-226	0/0:-0,-11.44,-228	0/0:-0.6,-7.22,-132.6	0/0:-0,-8.43,-161.2	0/0:-0,-12.04,-236	0/0:-0,-10.24,-199.3	0/0:-0.6,-10.24,-190.6	0/0:-0.19,-13.25,-238.4	0/0:-0,-6.02,-119.1	0/0:-0.01,-12.04,-233.8	0/0:-0.6,-10.24,-190.6	0/0:-0,-13.85,-267	0/0:-0,-13.25,-260.6	0/0:-0,-6.62,-132	0/0:-0.6,-3.01,-48.6	0/0:-0,-9.03,-180	0/0:-0,-7.83,-156	0/0:-0.6,-13.85,-260.6	0/0:-0.6,-9.03,-168.6	0/0:-0,-14.45,-281.7	0/0:-0.6,-3.61,-58.6	0/0:-0,-9.03,-180	0/0:-0.6,-8.43,-152.7	0/1:-34,-7.22,-108	0/0:-0,-10.24,-204	0/0:-1.2,-9.03,-155.2	0/0:-0,-16.86,-330.7	0/0:-0,-9.63,-190	0/0:-0,-14.45,-287.9	0/0:-0,-7.83,-154	0/0:-0.03,-7.22,-130.4	0/0:-0.6,-11.44,-211.6	0/0:-0.6,-12.04,-226.3	0/0:-0,-9.63,-192	0/0:-0.6,-7.22,-132.6	0/0:-0,-12.04,-239	0/0:-0.6,-7.22,-132.1
chr5	9560617	T	<INS:ME:Bov-A2>	PASS	TSD=null;ASSESS=4;INTERNAL=null,null;SVTYPE=Bov-A2;SVLEN=269;MEINFO=Bov-A2,0,269,+;DIFF=0.97:c54t,c74a,c97a,c103t,c111t,t142c,t143c,g194a,c197t,t210c,c218t,t222c,c230t,c255t,t259a,n263-269;LP=104;RP=89;RA=0.225;PRIOR=false;SR=37	0/1:-153.2,-12.64,-66	0/1:-141.4,-13.85,-91.3	0/0:-0,-12.64,-250	0/1:-70,-10.84,-128	0/1:-106,-10.84,-88	0/0:-0,-12.04,-240	0/0:-0,-10.24,-204	0/0:-0,-9.63,-192	0/0:-0,-11.44,-224.3	0/0:-0,-11.44,-228	0/0:-0.6,-12.04,-228.6	0/1:-72,-6.62,-44	0/0:-0,-27.09,-540	0/0:-0,-13.85,-276	0/0:-0,-6.02,-116.8	0/0:-0,-3.61,-72	0/1:-122,-12.64,-98	0/0:-0,-11.44,-228	0/0:-0,-12.64,-252	0/1:-20,-6.02,-96	0/0:-0,-8.43,-168	0/0:-0,-7.22,-144	0/1:-82,-7.22,-42	0/1:-110,-8.43,-30	0/0:-0,-11.44,-228	0/0:-0,-13.25,-264	0/0:-0,-13.25,-264	0/0:-0,-11.44,-228	0/0:-0,-13.25,-264	0/0:-0,-10.84,-216	0/0:-0,-9.03,-180	0/0:-0,-10.84,-216	0/0:-0,-7.83,-156	0/1:-123.1,-11.44,-78	0/0:-0,-12.64,-252	0/1:-142,-12.04,-66	0/1:-156,-10.84,-30	0/0:-0,-12.04,-240
chr5	11303275	A	<INS:ME:Bov-A2>	PASS	TSD=null;ASSESS=3;INTERNAL=XR_003034649.1,INTRONIC;SVTYPE=Bov-A2;SVLEN=266;MEINFO=Bov-A2,3,269,-;DIFF=0.99:c48t,t50c,c54t,c62a,a68g,c101t,a118c,n133,n140,g170a,g200c,g201a,c240t,c255t,n269;LP=72;RP=72;RA=0;PRIOR=false;SR=37	0/0:-0,-15.65,-312	0/0:-0,-7.22,-144	0/0:-0.13,-11.44,-222.6	0/0:-0,-8.43,-168	0/0:-0,-21.07,-420	0/0:-0,-9.03,-180	0/0:-0,-13.85,-275.5	0/0:-0,-9.63,-191.3	1/1:-231.81,-15.05,-1.81	0/0:-0,-10.24,-204	0/0:-0,-13.85,-276	0/1:-20,-6.02,-96	0/0:-0,-13.85,-276	0/0:-0,-10.84,-214	0/0:-0,-7.22,-144	0/0:-0,-3.61,-72	1/1:-217.81,-14.45,-1.81	0/1:-60,-5.42,-36	0/0:-0,-16.86,-336	1/1:-222,-12.64,-0	0/0:-0,-14.45,-288	0/0:-0,-5.42,-108	0/0:-0,-3.61,-72	0/1:-52,-13.25,-198	0/0:-0,-5.42,-108	0/1:-155.7,-16.86,-144	0/0:-0,-12.64,-252	0/0:-0,-11.44,-228	0/1:-150.3,-15.05,-120	0/0:-0,-7.83,-156	0/0:-0,-13.85,-274	0/0:-0,-17.46,-348	0/0:-0,-15.05,-299.6	0/0:-0,-9.63,-192	0/0:-0,-8.43,-168	1/1:-183.2,-12.04,-1.2	0/1:-74,-7.83,-72	0/0:-0,-10.84,-216
chr5	12606764	A	<INS:ME:Bov-A2>	PASS	TSD=TGTCTATGA;ASSESS=5;INTERNAL=XM_002687180.6,INTRONIC;SVTYPE=Bov-A2;SVLEN=267;MEINFO=Bov-A2,1,268,+;DIFF=1:a53g,a68g,g76a,c87t,t90a,c111t,g183a,g198a,c240t,c255t;LP=287;RP=318;RA=-0.148;PRIOR=false;SR=199	1/1:-324.6,-19.87,-0.6	1/1:-310,-18.06,-0	1/1:-162.6,-10.24,-0.6	0/1:-126,-9.03,-36	0/1:-96,-10.84,-108	1/1:-300,-17.46,-0	0/1:-163.3,-12.64,-60	1/1:-219.7,-13.25,-0	1/1:-243.81,-16.26,-1.81	1/1:-180,-10.84,-0	1/1:-152,-9.03,-0	1/1:-212,-12.04,-0	1/1:-356,-19.87,-0	0/1:-114,-10.24,-72	1/1:-226,-13.25,-0	1/1:-122,-7.22,-0	0/1:-104,-10.24,-84	1/1:-40.6,-3.01,-0.6	1/1:-233.7,-14.45,-0.6	0/1:-114,-12.04,-108	0/1:-124,-12.64,-108	1/1:-154,-9.03,-0	1/1:-162,-9.63,-0	0/1:-82,-9.03,-84	0/1:-128,-12.64,-108	1/1:-254,-15.05,-0	1/1:-326,-18.66,-0	0/0:-0,-10.84,-216	0/0:-0,-15.65,-312	1/1:-299.5,-18.06,-0.6	1/1:-294,-17.46,-0	1/1:-318.6,-19.27,-0.6	1/1:-180.6,-11.44,-0.6	0/1:-78,-6.62,-36	0/1:-186,-12.64,-48	1/1:-190.6,-11.44,-0.6	1/1:-214,-12.64,-0	0/1:-132,-12.64,-96
chr5	22217150	G	<INS:ME:Bov-A2>	PASS	TSD=null;ASSESS=4;INTERNAL=null,null;SVTYPE=Bov-A2;SVLEN=256;MEINFO=Bov-A2,12,268,-;DIFF=0.79:n1-11,c54t,a68g,c87t,c97t,g99a,g147a,g172t,c197t,g201t,n253,n255-269;LP=3;RP=14;RA=-2.222;PRIOR=false;SR=6	0/0:-0,-13.25,-264	0/1:-48,-10.24,-156	0/0:-0,-11.44,-228	0/0:-0,-5.42,-108	0/0:-0.6,-9.63,-179.1	0/0:-0,-9.63,-192	0/0:-0,-11.44,-228	0/0:-0,-15.05,-300	0/0:-0,-12.64,-252	0/0:-0,-9.03,-180	0/0:-0,-9.63,-192	0/0:-0.6,-12.04,-228.6	0/0:-0,-22.28,-444	0/0:-0,-12.64,-250	0/0:-0,-10.24,-204	0/0:-0,-8.43,-168	0/0:-0,-6.62,-132	0/0:-0,-9.03,-180	0/0:-0,-15.05,-300	0/0:-0,-12.04,-240	0/0:-0,-10.24,-202	0/0:-0,-6.62,-132	0/0:-0,-9.03,-180	0/0:-0.6,-12.64,-237.4	0/0:-0,-4.82,-96	0/0:-0,-6.62,-132	0/0:-0,-12.64,-252	0/0:-0,-5.42,-108	0/0:-0,-9.63,-192	0/0:-0,-15.05,-300	0/0:-0,-10.84,-214	0/0:-0,-12.64,-252	0/0:-1.2,-14.45,-264.6	0/0:-0,-14.45,-287.6	0/0:-0,-8.43,-168	0/0:-0,-9.63,-192	0/0:-0,-7.22,-144	0/0:-0,-8.43,-168
chr5	35041641	C	<INS:ME:Bov-A2>	PASS	TSD=0tsd;ASSESS=5;INTERNAL=XR_003034734.1,INTRONIC;SVTYPE=Bov-A2;SVLEN=263;MEINFO=Bov-A2,5,268,+;DIFF=0.99:n1-4,c54t,c130t,a137c,a154g,g198a,g228a,g231a,c246t;LP=15;RP=10;RA=0.585;PRIOR=false;SR=12	0/0:-0,-16.26,-324	0/0:-0,-12.64,-250	0/0:-0,-14.45,-288	0/0:-0,-9.03,-180	0/0:-0,-12.64,-252	0/0:-0,-11.44,-228	0/0:-0.13,-10.84,-210.1	0/0:-0,-12.04,-240	0/0:-0,-13.85,-276	0/0:-0,-11.44,-226	0/0:-0,-17.46,-344.3	0/0:-0,-14.45,-288	0/0:-0,-13.25,-262	0/0:-0,-16.26,-324	0/0:-0,-9.03,-180	0/0:-0,-11.44,-228	0/0:-0,-7.22,-144	0/0:-0,-7.22,-144	0/0:-0,-14.45,-288	0/0:-0,-10.24,-204	0/0:-0,-10.84,-216	0/0:-0,-4.82,-96	0/0:-0,-12.64,-252	0/1:-66,-12.04,-162	0/0:-0,-9.03,-180	0/0:-0,-7.22,-144	0/0:-0.01,-14.45,-281.9	0/0:-0,-7.22,-144	0/0:-0,-15.65,-312	0/0:-0,-9.03,-180	0/0:-0,-12.04,-240	0/0:-0,-12.04,-240	0/0:-0,-10.24,-204	0/0:-0,-10.24,-200	0/0:-0,-12.64,-252	0/0:-0,-12.04,-240	1/1:-195.2,-12.64,-1.2	0/0:-0,-6.62,-132
chr5	35792550	G	<INS:ME:Bov-A2>	PASS	TSD=null;ASSESS=4;INTERNAL=NM_001102084.1,INTRONIC;SVTYPE=Bov-A2;SVLEN=267;MEINFO=Bov-A2,1,268,+;DIFF=0.51:a42g,n88-118,c125g,g231a,g241a,g247a,g256a;LP=14;RP=6;RA=1.222;PRIOR=false;SR=20	0/0:-0,-16.26,-320	0/0:-1.21,-11.44,-192.9	0/0:-0,-12.64,-247.7	0/0:-0,-7.22,-144	0/1:-48,-10.24,-147.3	0/0:-0,-8.43,-167.6	0/0:-0,-16.86,-332	0/0:-0.13,-10.84,-208.6	0/0:-0,-16.26,-319	0/0:-0,-10.84,-216	0/0:-0.13,-13.85,-270.6	0/1:-42.63,-9.63,-124.63	0/0:-0,-12.64,-248	0/0:-0,-16.26,-324	0/0:-0,-10.84,-213.6	0/0:-0,-4.82,-94	0/0:-0,-12.64,-252	0/0:-0,-10.84,-216	0/0:-0,-16.26,-322	0/0:-0,-6.02,-120	0/0:-0,-16.26,-324	0/0:-0,-4.82,-92.6	0/0:-0.6,-8.43,-145.8	0/0:-0.89,-9.03,-134.8	0/0:-0,-7.83,-156	0/0:-1.2,-12.64,-222.8	0/0:-0.6,-14.45,-275.1	0/0:-0,-15.05,-300	0/0:-0,-13.85,-276	0/0:-0,-12.64,-252	0/0:-0,-9.03,-179.7	0/0:-0,-13.25,-264	0/0:-0,-12.04,-240	0/0:-0,-12.64,-248	0/0:-0,-9.63,-192	0/0:-0.6,-12.04,-213.1	0/0:-0,-7.22,-142.6	0/0:-0,-8.43,-168
chr5	40124092	C	<INS:ME:Bov-A2>	PASS	TSD=null;ASSESS=3;INTERNAL=XM_005206412.4,INTRONIC;SVTYPE=Bov-A2;SVLEN=266;MEINFO=Bov-A2,2,268,+;DIFF=0.78:n1,n16,g98a,c103t,g212t,a237g,n259-269;LP=2;RP=8;RA=-2;PRIOR=false;SR=4	0/0:-0,-17.46,-340.8	0/0:-0,-6.62,-129	0/0:-0,-13.85,-275.7	0/0:-0,-3.61,-71.1	0/0:-0,-9.03,-180	0/0:-0,-13.25,-262	0/0:-0,-9.63,-180	0/0:-1.51,-12.64,-213.5	0/0:-0,-15.05,-294.3	0/0:-0,-8.43,-168	0/0:-0,-15.05,-290.6	0/0:-1.2,-9.03,-155.2	0/0:-0,-14.45,-272.9	0/0:-0,-15.05,-289.4	0/0:-0,-11.44,-224	0/0:-0,-5.42,-108	0/0:-0.03,-7.83,-147.2	0/0:-0,-5.42,-105.1	0/0:-0,-13.85,-272.3	0/0:-0,-7.83,-150	0/0:-0,-15.65,-301.1	0/0:-0,-6.02,-120	0/0:-0,-4.21,-80	0/1:-58,-7.83,-96	0/0:-0,-9.63,-190	0/0:-0,-10.24,-204	0/0:-0,-13.25,-256.8	0/0:-0,-12.04,-236	0/0:-0,-9.63,-192	0/0:-0,-13.25,-264	0/0:-0,-9.03,-180	0/0:-0,-12.64,-250	0/0:-0,-12.04,-238	0/0:-0,-13.25,-260.3	0/0:-0,-4.21,-84	0/0:-0,-6.02,-118	0/0:-0,-9.03,-176	0/0:-0,-7.83,-154
chr5	42524039	A	<INS:ME:Bov-A2>	PASS	TSD=null;ASSESS=4;INTERNAL=null,null;SVTYPE=Bov-A2;SVLEN=267;MEINFO=Bov-A2,1,268,+;DIFF=1:g51a,c54t,c71t,t72g,t90a,a91c,c97t,g198a,g200a,g231a,a253c,c255t,c266t;LP=45;RP=84;RA=-0.9;PRIOR=false;SR=42	0/0:-0,-18.66,-360.5	0/0:-0.01,-9.63,-175.4	0/0:-0,-10.84,-211.7	0/0:-0,-9.63,-190	0/0:-0,-10.24,-204	0/0:-0,-12.04,-240	0/0:-0,-12.04,-240	0/0:-0,-12.04,-240	0/0:-0,-14.45,-288	0/0:-0,-11.44,-220.8	0/0:-0,-16.86,-330	0/0:-0,-7.22,-142.9	0/0:-0,-17.46,-339.8	0/0:-0,-13.85,-276	0/0:-0,-10.24,-197.4	0/0:-0,-6.62,-128.8	1/1:-100.7,-7.83,-1.23	0/0:-0,-10.24,-204	0/0:-0,-10.84,-215.3	0/1:-110.1,-12.64,-103.51	0/0:-0,-12.64,-252	0/0:-0,-5.42,-108	0/1:-37.1,-10.84,-161.8	0/1:-48.3,-9.63,-102.51	0/0:-0,-9.03,-174.8	0/1:-77.1,-10.24,-101	0/0:-0,-16.26,-324	0/0:-0,-13.85,-276	0/1:-63.92,-18.66,-262.23	0/0:-0,-9.63,-190	0/1:-16.1,-5.42,-73.27	0/0:-0,-16.26,-320.5	0/0:-0,-10.24,-203.2	0/0:-0,-16.26,-322	0/0:-0,-13.25,-262.2	0/1:-80.2,-9.63,-69.01	1/1:-188.9,-12.64,-1.3	0/0:-0,-10.24,-202.6
chr5	44072985	A	<INS:ME:Bov-A2>	PASS	TSD=ATATATCAAGGA;ASSESS=5;INTERNAL=null,null;SVTYPE=Bov-A2;SVLEN=267;MEINFO=Bov-A2,1,268,-;DIFF=1:c17a,c25t,a26g,c54t,a60g,a68g,a92g,c97t,c103t,g226a;LP=329;RP=295;RA=0.157;PRIOR=false;SR=230	1/1:-313.2,-19.27,-1.21	0/1:-154,-10.84,-34	0/0:-0,-15.65,-312	0/0:-0,-7.83,-156	0/1:-272,-18.06,-48	0/1:-168,-16.26,-126.6	1/1:-282.6,-16.86,-0.6	1/1:-373.2,-22.88,-1.21	0/1:-112,-10.84,-84	0/1:-112,-12.64,-120	1/1:-341.81,-21.07,-1.81	1/1:-177.7,-10.24,-0.6	0/0:-0,-10.84,-216	1/1:-220.11,-14.45,-1.81	1/1:-275.81,-18.06,-1.81	1/1:-130,-7.22,-0	1/1:-238.6,-14.45,-0.6	1/1:-208,-12.04,-0	0/1:-144,-15.05,-132	0/1:-94,-8.43,-60	1/1:-325.71,-20.47,-1.81	0/0:-0,-2.41,-48	1/1:-222,-12.64,-0	1/1:-184.9,-12.04,-1.2	1/1:-224.6,-13.85,-0.6	0/1:-214,-17.46,-96	1/1:-316.6,-18.06,-0.6	1/1:-262.6,-15.65,-0.6	1/1:-287.81,-18.06,-1.81	1/1:-208.6,-12.64,-0.6	1/1:-272.6,-16.86,-0.6	1/1:-325.91,-21.67,-2.42	0/1:-158,-12.04,-60	0/1:-166,-11.44,-36	1/1:-380.6,-22.88,-0.6	0/1:-92,-9.03,-72	0/1:-164,-13.85,-84	1/1:-202,-11.44,-0
chr5	46791887	A	<INS:ME:Bov-A2>	PASS	TSD=dTAGCAGCAGCAGCAGC;ASSESS=5;INTERNAL=XM_010805113.3,INTRONIC;SVTYPE=Bov-A2;SVLEN=267;MEINFO=Bov-A2,1,268,-;DIFF=0.99:a10g,c32a,c37a,c54t,c62t,t67a,g88t,a91g,a94g,c111t,d152,c180t,c197t,a223g,i225g,c246t;LP=20;RP=23;RA=-0.202;PRIOR=false;SR=24	0/0:-0,-12.64,-247.5	0/0:-0,-7.22,-142	0/0:-0,-11.44,-228	0/0:-0,-12.64,-252	0/0:-0,-10.24,-203.9	0/0:-0.69,-10.24,-196.9	0/0:-0,-10.84,-216	0/0:-0,-8.43,-165.9	0/0:-0,-12.04,-240	0/0:-0,-6.02,-119.5	0/0:-0,-14.45,-288	0/1:-60,-8.43,-90	0/0:-0,-12.64,-251	0/0:-0,-8.43,-168	0/0:-0,-3.01,-60	0/0:-0,-6.62,-132	0/0:-0.6,-7.22,-132.6	0/0:-0,-6.62,-132	0/0:-0,-6.02,-120	0/1:-68,-7.22,-67.8	0/0:-0,-12.04,-237.9	0/0:-0,-4.21,-84	0/0:-0,-9.03,-180	0/0:-1.2,-9.63,-155.2	0/0:-0,-7.22,-144	0/0:-0.05,-13.25,-257	0/0:-0,-8.43,-168	0/0:-0,-12.04,-238	0/0:-0.13,-13.85,-269.5	0/0:-0,-15.65,-311.4	0/0:-0,-7.22,-144	0/0:-0,-6.02,-120	0/0:-0,-11.44,-228	0/0:-0,-6.62,-132	0/0:-0,-15.05,-299.4	0/1:-137.5,-12.64,-77.1	0/1:-63.5,-8.43,-94	0/0:-0,-9.03,-180
chr5	50022266	T	<INS:ME:Bov-A2>	PASS	TSD=T;ASSESS=5;INTERNAL=null,null;SVTYPE=Bov-A2;SVLEN=267;MEINFO=Bov-A2,1,268,+;DIFF=0.38:c9a,g14a,c17a,a42c,t50c,g65t,g69a,g73a,g88a,t90a,n103-269;LP=4;RP=6;RA=-0.585;PRIOR=false;SR=10	0/0:-1.2,-12.04,-209.1	0/0:-0,-13.85,-274	0/0:-0,-11.44,-226	0/0:-0.62,-6.62,-114	0/0:-0.6,-14.45,-264.3	0/0:-0.66,-10.84,-195.3	0/0:-0,-16.26,-322	0/0:-0,-15.05,-298	0/0:-1.2,-12.64,-223.7	0/1:-36.2,-15.05,-236.83	0/0:-0,-16.26,-319.8	0/1:-30,-7.22,-104	0/0:-0.01,-13.25,-259.7	0/0:-0.6,-7.83,-128.8	0/0:-0,-8.43,-166	0/0:-0,-3.61,-72	0/0:-0,-6.62,-132	0/0:-0,-6.02,-120	0/0:-0,-13.85,-269	0/0:-0,-8.43,-162	0/0:-0.6,-16.86,-324.6	0/0:-0,-5.42,-108	0/0:-0.6,-11.44,-212.4	0/0:-0.6,-5.42,-81.4	0/0:-0,-10.24,-204	0/0:-0,-11.44,-226.5	0/0:-0.6,-9.63,-172.8	0/0:-1.2,-10.84,-186.1	0/0:-0.13,-7.22,-134.9	0/0:-0,-15.05,-295.8	0/0:-0,-9.63,-192	0/0:-0,-12.64,-247.7	0/0:-0,-14.45,-285.9	0/0:-0.6,-13.25,-238.9	0/0:-0,-10.24,-200	0/0:-0,-4.21,-84	0/0:-0,-9.03,-175.4	0/0:-0,-6.02,-120
chr5	54897496	A	<INS:ME:Bov-A2>	PASS	TSD=null;ASSESS=3;INTERNAL=null,null;SVTYPE=Bov-A2;SVLEN=266;MEINFO=Bov-A2,2,268,+;DIFF=0.98:n1,a53g,g58a,c87t,g93a,g98a,a124g,t127c,a131t,n265-269;LP=35;RP=35;RA=0;PRIOR=false;SR=4	0/0:-0.73,-18.06,-343.2	0/0:-0,-9.03,-180	0/0:-0.01,-16.26,-319.8	1/1:-82,-4.82,-0	0/1:-69.5,-9.03,-96	0/0:-0,-12.04,-240	0/0:-0,-15.05,-298	0/0:-0,-9.03,-179.9	0/0:-0,-12.64,-250	0/0:-0,-13.25,-264	0/0:-0,-17.46,-348	1/1:-97.4,-7.83,-1.21	0/0:-0,-14.45,-288	0/0:-0,-11.44,-228	0/0:-0,-6.62,-132	0/0:-0,-7.22,-144	0/0:-0,-4.82,-96	0/0:-0,-4.21,-84	0/0:-0,-18.66,-372	0/1:-79.3,-8.43,-72	0/0:-0,-20.47,-408	0/0:-0,-5.42,-108	0/0:-0,-5.42,-108	0/1:-26.1,-9.63,-154.9	0/0:-0,-10.84,-216	0/0:-0,-12.64,-252	0/0:-0,-12.04,-240	0/0:-0,-13.25,-260	0/0:-0,-10.24,-204	0/0:-0.01,-15.65,-307.8	0/0:-0,-12.64,-251.4	0/0:-0,-14.45,-288	0/0:-0,-11.44,-228	0/1:-96.5,-16.26,-200.5	0/0:-0,-4.82,-96	0/1:-78.2,-9.03,-84	0/0:-0,-8.43,-168	0/0:-0,-8.43,-168
chr5	57954755	G	<INS:ME:Bov-A2>	PASS	TSD=null;ASSESS=3;INTERNAL=null,null;SVTYPE=Bov-A2;SVLEN=248;MEINFO=Bov-A2,20,268,-;DIFF=0.38:n1-19,g40a,t67c,g73a,t77c,g88a,t90a,g98a,g104a,t115c,n127-188,g193t,g198a,g204t,g228a,c246t,a253t,c255t,n264-269;LP=5;RP=11;RA=-1.138;PRIOR=false;SR=4	0/0:-0,-15.05,-300	0/0:-1.81,-15.05,-259.81	0/0:-0,-18.66,-372	0/0:-0,-3.61,-69.9	0/0:-0,-14.45,-288	0/0:-0,-11.44,-228	0/0:-0,-8.43,-168	0/0:-0,-11.44,-228	0/0:-0,-19.27,-384	0/0:-0,-6.02,-120	0/0:-0,-13.25,-262	0/0:-0,-7.83,-156	0/0:-0,-10.24,-204	0/0:-0,-10.24,-204	0/0:-0,-7.22,-143.2	0/0:-0,-5.42,-108	0/0:-0,-8.43,-168	0/0:-0,-7.83,-154.3	0/0:-0,-15.65,-312	0/0:-0.01,-13.25,-255.1	0/0:-0,-15.05,-300	0/0:-0,-4.21,-84	0/0:-0,-1.81,-36	0/0:-0,-13.25,-260	0/1:-44.6,-18.06,-294.02	0/1:-40.23,-19.87,-322.71	0/0:-0,-8.43,-168	0/0:-0,-14.45,-286	0/0:-0,-13.85,-276	0/0:-0,-16.86,-336	0/0:-0,-10.24,-204	0/0:-0,-16.26,-324	0/0:-0.6,-13.85,-264.2	0/0:-0,-18.66,-372	0/0:-0,-1.2,-24	0/0:-0,-7.22,-141.5	0/0:-0,-10.84,-212.7	0/0:-0,-13.25,-264
chr5	58119669	T	<INS:ME:Bov-A2>	PASS	TSD=null;ASSESS=3;INTERNAL=XM_002687441.4,PROMOTER;SVTYPE=Bov-A2;SVLEN=268;MEINFO=Bov-A2,1,269,-;DIFF=0.69:n1-42,c54t,g66a,g85a,a91g,a92g,g112c,c117a,g147a,a160c,g194c,g198a,c218t,g241a,c246t,c255t,n267-269;LP=3;RP=2;RA=0.585;PRIOR=false;SR=4	0/0:-0,-13.85,-276	0/0:-0,-5.42,-108	0/0:-0,-13.25,-262	0/0:-0,-4.82,-96	0/0:-0,-13.25,-263.6	0/0:-0,-10.84,-216	0/0:-0,-10.84,-215.8	0/0:-0,-10.24,-204	0/0:-0,-13.85,-276	0/0:-0,-6.62,-132	0/0:-0,-17.46,-346	0/1:-103.5,-18.06,-228	0/0:-0,-12.64,-250.8	0/0:-0,-13.85,-276	0/0:-0,-9.03,-180	0/0:-0,-7.22,-144	0/0:-0,-9.03,-180	0/0:-0,-6.62,-132	0/0:-0,-17.46,-348	0/0:-0,-9.03,-180	0/0:-0,-15.05,-300	0/0:-0,-4.21,-84	0/0:-0,-4.21,-84	0/0:-0,-9.63,-192	0/0:-0,-8.43,-168	0/0:-0,-9.03,-180	0/0:-0,-15.05,-300	0/0:-0,-16.26,-324	0/0:-0,-18.06,-360	0/0:-0,-10.84,-216	0/0:-0,-8.43,-168	0/0:-0,-10.24,-204	0/0:-0,-16.86,-334	0/0:-0,-16.86,-336	0/0:-0,-9.03,-178	0/0:-0,-10.24,-204	0/0:-0,-9.63,-192	0/0:-0,-9.03,-180
chr5	58178489	A	<INS:ME:Bov-A2>	PASS	TSD=null;ASSESS=4;INTERNAL=XM_002687594.3,TERMINATOR;SVTYPE=Bov-A2;SVLEN=266;MEINFO=Bov-A2,2,268,-;DIFF=0.99:n1,c25a,t38a,g70c,c111t,n139,c175t,g178a,g198a,g199t,g200a,g209a,g216t,g231a,c240t;LP=110;RP=133;RA=-0.274;PRIOR=false;SR=22	0/1:-28.7,-7.83,-118	0/1:-50,-9.03,-116	0/0:-0.03,-12.64,-247.2	0/1:-48.5,-6.62,-72	0/1:-72,-9.63,-108	0/0:-0,-11.44,-228	0/0:-0,-8.43,-168	0/0:-0,-10.84,-216	0/1:-148.4,-18.66,-187.8	0/0:-0.6,-6.02,-99.7	0/0:-0,-15.05,-293.8	0/0:-1.45,-6.02,-94.3	0/0:-0,-16.26,-320	0/1:-50,-6.62,-70.2	0/0:-0,-8.43,-167.2	0/1:-47.86,-6.62,-44.72	0/0:-0,-6.02,-120	0/1:-51,-9.03,-114.7	0/1:-48.3,-10.84,-155.7	0/1:-68.8,-7.22,-56.8	0/1:-107.3,-13.25,-126.7	0/1:-27.56,-4.82,-44.8	0/1:-116.8,-10.84,-72	0/1:-55.2,-5.42,-30.03	0/1:-60,-10.84,-136.4	0/1:-97.36,-15.05,-149.67	0/1:-128.93,-15.65,-150.6	0/0:-0,-10.84,-216	0/0:-0,-9.03,-180	0/1:-131.8,-14.45,-119.61	0/1:-50.13,-12.04,-168.6	0/0:-0.6,-10.24,-185.6	0/0:-0,-12.04,-240	0/1:-56.2,-9.03,-105.5	0/1:-118.5,-13.85,-132	0/1:-49.2,-9.03,-120	0/1:-142.7,-18.06,-180	0/0:-0,-8.43,-168
chr5	59657578	T	<INS:ME:Bov-A2>	PASS	TSD=dTAGAAACCAGTTT;ASSESS=5;INTERNAL=XM_002687517.5,TERMINATOR;SVTYPE=Bov-A2;SVLEN=267;MEINFO=Bov-A2,1,268,-;DIFF=0.8:c19a,c54t,t67a,g70a,a80g,g88a,a91g,a94g,c97g,g98a,c114a,c123t,a148g,c167g,g219a,g231a,n252-269;LP=29;RP=6;RA=2.273;PRIOR=false;SR=12	0/0:-0,-15.05,-297.5	0/0:-0,-21.07,-404	0/0:-0,-11.44,-227.9	0/0:-0,-9.63,-190	0/0:-0.6,-24.68,-470.6	0/0:-0.6,-15.65,-293.6	0/0:-0,-12.64,-252	0/0:-0,-14.45,-288	0/0:-0,-10.24,-204	0/0:-0,-14.45,-286	0/0:-0,-9.63,-190.7	0/0:-0,-16.86,-328.7	0/0:-0,-7.22,-144	0/0:-0,-7.22,-144	0/0:-0,-9.63,-190	0/0:-0,-5.42,-106	0/0:-1.2,-18.06,-335.2	0/0:-0,-7.83,-156	0/0:-0,-13.25,-262.9	0/0:-1.2,-13.85,-247.6	0/0:-0.61,-18.66,-344.1	0/0:-0,-6.02,-120	0/0:-0.6,-7.83,-141	0/0:-1.21,-13.85,-234.9	0/0:-0,-13.85,-270	0/0:-0.01,-12.64,-242.3	0/0:-0,-10.84,-216	0/0:-0,-11.44,-228	0/1:-79.06,-21.07,-316.7	0/0:-0,-10.84,-216	0/0:-0,-17.46,-331.5	0/0:-0,-12.04,-240	0/0:-0.72,-16.26,-290.9	0/0:-0,-15.65,-310.7	0/0:-0.63,-10.84,-196.8	0/0:-0,-7.22,-144	0/0:-0.6,-15.05,-280	0/0:-1.2,-9.63,-169.2
chr5	59665233	T	<INS:ME:Bov-A2>	PASS	TSD=null;ASSESS=4;INTERNAL=XM_002687517.5,PROMOTER;SVTYPE=Bov-A2;SVLEN=266;MEINFO=Bov-A2,2,268,+;DIFF=0.99:n1,t50c,g55a,g83a,c103t,t135a,g195a,g198a,g200a,g211a,c214a,t215g,t224c,c230t,g242a,a245g,g247a,c263t;LP=49;RP=28;RA=0.807;PRIOR=false;SR=6	0/0:-0,-10.84,-214.2	0/1:-50.2,-9.63,-120.08	0/0:-0,-12.04,-236.1	0/0:-0,-2.41,-48	0/1:-62.4,-15.05,-179.92	0/0:-1.2,-16.86,-312.5	0/0:-0,-15.65,-309	0/0:-0,-13.85,-275.1	0/0:-0,-14.45,-284.8	0/0:-0,-6.02,-115.5	0/0:-0,-13.25,-262.4	0/1:-19.69,-19.27,-291.23	0/0:-0,-14.45,-268.8	0/0:-0,-21.67,-430.5	0/0:-0,-10.84,-211	0/0:-0,-6.02,-118	0/1:-42.7,-12.64,-147.85	0/1:-26.9,-5.42,-57.82	0/0:-0,-20.47,-402.4	0/1:-34.8,-12.04,-171.32	0/0:-1.28,-15.65,-273.2	0/0:-0,-4.82,-94	0/1:-12.8,-3.01,-24.8	0/1:-76.6,-15.05,-199.9	0/1:-36.5,-9.03,-102.39	0/1:-40.5,-10.24,-122.12	0/0:-0,-9.63,-189	0/0:-0,-8.43,-167.7	0/0:-0.08,-12.64,-234.5	0/0:-0,-10.24,-201.5	0/1:-81.8,-18.66,-238.6	0/0:-0,-13.25,-261.9	0/0:-1.28,-13.85,-242.5	0/0:-0.06,-15.65,-299.5	0/0:-0.6,-6.02,-103.6	0/0:-0.17,-12.64,-244.7	0/1:-57.7,-7.83,-48.36	0/1:-26.2,-10.84,-152.66
chr5	59668442	T	<INS:ME:Bov-A2>	PASS	TSD=null;ASSESS=4;INTERNAL=XM_002687517.5,PROMOTER;SVTYPE=Bov-A2;SVLEN=267;MEINFO=Bov-A2,1,268,+;DIFF=0.98:c20t,a21g,t34g,g35t,c37t,c54t,a68g,g98t,t142c,c167t,a184g,g219a,g228c,g231a,c255t,c266t;LP=99;RP=25;RA=1.986;PRIOR=false;SR=9	0/0:-0,-13.25,-264	0/0:-1.39,-15.05,-226.8	0/0:-0,-15.65,-307.3	0/1:-11.93,-2.41,-11.22	0/0:-2.14,-17.46,-279.81	0/0:-1.84,-19.27,-321.11	0/0:-0,-20.47,-405.9	0/0:-0,-9.03,-176	0/0:-0,-21.07,-420	0/0:-0,-6.62,-131.5	0/0:-0,-15.05,-296	0/1:-35.52,-16.86,-208.9	0/0:-0,-9.03,-175	0/0:-0,-14.45,-288	0/0:-0,-11.44,-222.9	0/0:-0,-9.03,-176.9	0/0:-1.36,-16.86,-262.7	0/0:-0.6,-4.21,-61.3	0/0:-0,-16.26,-324	0/1:-56.11,-15.65,-156.7	0/0:-1.26,-12.04,-199.4	0/0:-0,-1.81,-36	0/1:-11.99,-3.61,-28.33	0/1:-16.85,-12.04,-189.02	0/0:-1.55,-13.25,-190.6	0/0:-1.44,-12.64,-189.6	0/0:-0,-14.45,-281.4	0/0:-0,-9.03,-178	0/1:-42.38,-28.3,-407.5	0/0:-0,-12.64,-252	0/0:-2.06,-22.88,-330.6	0/0:-0,-16.86,-334	0/0:-1.14,-12.04,-199.3	0/1:-46.83,-18.06,-260.54	0/0:-0.1,-3.01,-42	0/0:-1.21,-7.83,-121.4	0/0:-0.66,-7.22,-110.5	0/0:-1.21,-8.43,-129.5
chr5	59752767	A	<INS:ME:Bov-A2>	PASS	TSD=null;ASSESS=4;INTERNAL=XM_005206733.3,PROMOTER;SVTYPE=Bov-A2;SVLEN=266;MEINFO=Bov-A2,2,268,-;DIFF=0.99:n1,t50c,g55a,g83a,c103t,t135a,g195a,g198a,g200a,g211a,c214a,t215g,t224c,c230t,g242a,a245g,g247a,c263t;LP=46;RP=42;RA=0.131;PRIOR=false;SR=5	0/0:-0,-18.06,-356.4	0/0:-0.6,-10.24,-185.4	0/0:-0,-14.45,-283.1	0/1:-25.1,-4.21,-36.85	0/1:-75.4,-18.06,-222.99	0/0:-1.81,-16.86,-298.01	0/0:-0,-18.06,-352.5	0/0:-0,-15.65,-306.9	0/0:-0,-14.45,-280.8	0/0:-0.05,-12.04,-224.1	0/0:-0,-17.46,-340	0/0:-0.6,-13.85,-238.9	0/0:-0,-10.24,-193.4	0/0:-0,-12.04,-235.8	0/0:-0,-6.62,-125	0/0:-0,-7.83,-149.5	0/1:-107.2,-15.05,-142.72	0/0:-1.2,-7.22,-119.9	0/0:-0,-14.45,-279.4	0/1:-46.6,-13.85,-182.9	0/1:-59.93,-19.27,-283.52	0/0:-0,-4.82,-93.6	0/1:-27.3,-4.82,-60	0/0:-1.2,-10.84,-173.5	0/0:-0,-12.04,-221.3	0/1:-51.4,-9.63,-127.4	0/0:-0,-10.84,-213.5	0/0:-0,-11.44,-225.3	0/1:-54.5,-21.67,-308.65	0/0:-0,-15.65,-307.2	0/1:-41.9,-13.85,-184.93	0/0:-0,-11.44,-223.7	0/0:-0.6,-16.86,-310	0/0:-1.2,-13.25,-232.1	0/1:-32.4,-7.22,-96	0/1:-15.4,-6.02,-83.33	0/0:-1.2,-12.64,-220.4	0/1:-22.62,-9.63,-142.42
chr5	62276601	T	<INS:ME:Bov-A2>	PASS	TSD=dTCACT;ASSESS=5;INTERNAL=null,null;SVTYPE=Bov-A2;SVLEN=267;MEINFO=Bov-A2,1,268,+;DIFF=0.38:t50c,c54t,g73a,g88a,t90a,a91c,g98a,n129-142,g172a,g185a,g193t,c197t,g200a,g204a,n208-269;LP=4;RP=7;RA=-0.807;PRIOR=false;SR=8	0/0:-0,-15.05,-300	0/0:-0.06,-13.25,-240.9	0/0:-0.01,-14.45,-281.9	0/0:-0,-13.25,-264	0/1:-24,-6.02,-94	0/0:-0,-12.04,-240	0/0:-0,-16.26,-324	0/0:-0,-15.05,-300	0/0:-0,-14.45,-283.6	0/0:-0,-7.22,-142	0/0:-0,-12.04,-238.8	0/0:-0.73,-7.83,-133	0/0:-0,-19.27,-376	0/0:-0,-11.44,-228	0/0:-0.6,-9.03,-167.1	0/0:-0,-10.24,-199.1	0/0:-0,-9.03,-177.7	0/0:-0,-7.83,-156	0/0:-0,-15.65,-312	0/0:-0,-7.22,-139.2	0/0:-0,-13.85,-276	0/0:-0,-4.21,-80.4	0/0:-0,-12.04,-240	0/0:-1.2,-7.83,-128.8	0/0:-0,-10.84,-201.9	0/0:-0,-8.43,-163.9	0/0:-0,-13.25,-262.8	0/0:-0,-16.86,-332	0/0:-0.77,-9.63,-171.1	0/0:-0,-11.44,-228	0/0:-0.6,-10.24,-188.7	0/0:-0,-11.44,-228	0/0:-0,-6.02,-120	0/0:-0,-15.65,-312	0/0:-0,-7.22,-144	0/0:-0,-11.44,-228	0/0:-0.6,-8.43,-156.6	0/0:-0,-6.62,-132
chr5	68333847	T	<INS:ME:Bov-A2>	PASS	TSD=CAGAATATATTTTCTT;ASSESS=5;INTERNAL=XR_003034783.1,INTRONIC;SVTYPE=Bov-A2;SVLEN=251;MEINFO=Bov-A2,18,269,-;DIFF=0.18:n50-269;LP=15;RP=22;RA=-0.553;PRIOR=false;SR=47	0/0:-0,-17.46,-348	0/0:-0,-10.24,-204	0/0:-0,-9.03,-180	0/0:-0,-1.81,-36	0/0:-0.6,-9.63,-178.6	0/0:-0,-12.64,-250.6	0/0:-0,-7.83,-156	0/0:-0,-12.04,-239	0/0:-0.6,-12.64,-240.6	0/0:-0,-7.83,-154	0/0:-0,-10.24,-203.2	0/0:-1.2,-10.84,-185.6	0/0:-0,-10.84,-216	0/0:-0,-12.04,-240	0/0:-0,-7.22,-144	0/0:-0,-10.24,-201	1/1:-95.2,-5.42,-0.6	0/0:-0,-6.02,-120	0/0:-0,-10.24,-204	0/1:-108,-9.03,-72	0/0:-0.6,-15.65,-300.4	0/0:-0,-6.62,-132	0/0:-0,-1.81,-36	0/0:-0,-10.24,-204	0/0:-0,-9.63,-192	0/0:-0,-7.22,-144	0/0:-0,-15.65,-310	0/0:-0,-14.45,-288	0/0:-1.2,-8.43,-142.2	0/0:-0,-12.64,-250	0/0:-0,-9.63,-192	0/0:-0,-13.25,-264	0/0:-0,-12.04,-240	0/0:-0,-10.24,-203.4	0/0:-0,-7.22,-144	0/0:-0,-7.22,-144	0/1:-36,-3.61,-36	0/0:-0,-6.02,-120
chr5	78225120	T	<INS:ME:Bov-A2>	PASS	TSD=T;ASSESS=5;INTERNAL=XM_024991809.1,INTRONIC;SVTYPE=Bov-A2;SVLEN=263;MEINFO=Bov-A2,5,268,+;DIFF=0.98:n1-5,g55a,a68g,c71t,a192g,g198a,a223c,c230g;LP=52;RP=75;RA=-0.528;PRIOR=false;SR=4	0/0:-0,-17.46,-339.6	0/1:-26.4,-8.43,-110.02	0/0:-0,-15.05,-283.6	0/1:-48.7,-9.03,-106	0/0:-0,-11.44,-220.9	0/0:-0,-13.25,-260	0/0:-0,-15.05,-289.6	0/0:-0,-16.86,-323.1	0/0:-0,-13.85,-271.5	0/0:-0.62,-4.82,-67.9	0/0:-0,-9.63,-187.1	1/1:-65.1,-5.42,-0.03	0/1:-87.8,-13.25,-135.7	0/0:-0,-12.64,-249.4	0/0:-0.05,-7.83,-134.8	0/0:-0,-5.42,-97.8	0/0:-0,-8.43,-162	0/0:-0,-8.43,-164.4	0/0:-0,-10.24,-194.7	0/1:-40.2,-7.22,-82.8	0/0:-0,-8.43,-159.9	0/0:-0,-1.81,-30.5	0/1:-45.1,-5.42,-48	1/1:-36.7,-4.21,-0.46	0/0:-0,-6.62,-120	1/1:-86.9,-7.22,-0.99	0/0:-0,-7.83,-152.7	0/0:-0,-10.24,-202.5	0/1:-49.6,-11.44,-148.21	0/0:-0,-15.65,-306.4	1/1:-88.3,-8.43,-0.67	0/1:-72.9,-12.64,-125.99	0/0:-0,-13.85,-266.8	0/0:-0.69,-11.44,-216.6	0/1:-99.2,-14.45,-129.16	0/1:-31.8,-5.42,-48.46	1/1:-41.3,-3.61,-0.6	0/1:-37,-6.62,-70.82
chr5	78250635	T	<INS:ME:Bov-A2>	PASS	TSD=T;ASSESS=5;INTERNAL=XM_024991809.1,INTRONIC;SVTYPE=Bov-A2;SVLEN=262;MEINFO=Bov-A2,6,268,-;DIFF=0.98:n1-5,g55a,a68g,c71t,a192g,g198a,a223c,c230g;LP=48;RP=14;RA=1.778;PRIOR=false;SR=12	0/0:-0,-13.85,-272.2	0/1:-28,-13.25,-178.25	0/0:-0,-13.25,-257.6	0/0:-0.6,-12.04,-219.8	0/0:-0,-7.22,-137.6	0/0:-0,-11.44,-216	0/0:-0,-7.22,-138.9	0/0:-0,-9.63,-181.3	0/0:-0,-12.64,-245.6	0/1:-12.1,-8.43,-120.35	0/0:-0,-12.04,-231.8	0/1:-27.97,-15.65,-187.55	0/0:-0.65,-19.87,-351.8	0/0:-0.06,-16.86,-320.8	0/0:-0.1,-8.43,-145.9	0/0:-0,-10.24,-184	0/0:-0.24,-9.03,-160	0/0:-0.08,-7.83,-143.4	0/0:-0,-12.64,-245.6	0/0:-1.2,-9.63,-164.5	0/0:-0,-10.84,-211.4	0/0:-0.72,-6.62,-102.4	0/0:-0.6,-6.62,-120.6	0/1:-39.9,-13.25,-147.46	0/0:-0,-6.62,-122.8	0/1:-21,-11.44,-164.61	0/0:-0,-14.45,-279.6	0/0:-0,-15.05,-291.8	0/0:-0.6,-12.64,-228.2	0/0:-0,-7.22,-137.5	0/1:-43.42,-13.85,-163.01	0/0:-1.81,-18.66,-320.81	0/0:-0,-11.44,-220.2	0/0:-0,-13.25,-257.3	0/0:-1.2,-13.25,-236.8	0/1:-37.7,-7.22,-84.44	0/1:-41.3,-11.44,-140.15	0/1:-26.1,-10.84,-152.82
chr5	84299056	A	<INS:ME:Bov-A2>	PASS	TSD=AAAAAAAAAAAA;ASSESS=5;INTERNAL=null,null;SVTYPE=Bov-A2;SVLEN=256;MEINFO=Bov-A2,12,268,+;DIFF=0.82:n1-11,c17a,c30t,c54a,g55a,t77a,g84a,t86a,g88a,g93a,a94g,t96a,c111t,c165t,g172a,g193t,a196g,c197t,g200a,g216a,c218a,t222c,t224c,c230t,c234a,c240t;LP=9;RP=9;RA=0;PRIOR=false;SR=8	0/0:-0,-12.64,-252	0/0:-0,-10.24,-196.3	0/0:-0,-7.83,-156	0/0:-0,-7.83,-155.7	0/0:-0,-12.64,-252	0/0:-0,-13.25,-262.2	0/0:-0.63,-12.04,-223.8	0/0:-0,-6.62,-132	0/0:-1.2,-11.44,-202.5	0/0:-0,-7.83,-156	0/0:-0.6,-14.45,-276.6	0/0:-0,-4.82,-96	0/0:-0,-13.85,-270	0/0:-0.6,-10.24,-192.6	0/0:-0,-5.42,-106.6	0/0:-0,-4.82,-96	0/0:-0.6,-7.83,-135.6	0/0:-0,-9.03,-180	0/0:-1.2,-10.24,-181.2	0/1:-46,-12.64,-204	0/0:-0.6,-12.04,-228.6	0/0:-0,-3.61,-72	0/0:-0,-4.21,-84	0/0:-0,-4.21,-81.3	0/0:-0.6,-11.44,-216.6	0/0:-0,-15.05,-288	0/0:-0,-9.63,-192	0/0:-0.6,-11.44,-212.6	0/0:-0,-10.24,-200.9	0/0:-0,-9.03,-180	0/0:-0,-6.62,-132	0/1:-48,-8.43,-120	0/0:-0.6,-10.84,-204.6	0/0:-0,-15.05,-300	0/0:-0,-10.84,-216	0/0:-0,-11.44,-228	0/0:-0,-10.24,-204	0/0:-0,-8.43,-168
chr5	88637239	C	<INS:ME:Bov-A2>	PASS	TSD=dCAG;ASSESS=5;INTERNAL=NM_001192905.1,INTRONIC;SVTYPE=Bov-A2;SVLEN=267;MEINFO=Bov-A2,1,268,-;DIFF=1:t34c,c54t,g55a,c74t,a118c,a137c,t142c,a149g,g183a,g228a,c246t,c255t;LP=136;RP=100;RA=0.444;PRIOR=false;SR=9	0/1:-93.5,-11.44,-120	0/0:-0,-6.62,-132	0/1:-114,-13.85,-144	0/1:-70,-10.84,-132	0/0:-0,-5.42,-108	0/1:-100,-12.04,-120	0/1:-102,-9.63,-72	0/0:-0,-11.44,-228	0/0:-0,-10.84,-216	0/1:-84,-12.64,-156	0/1:-60,-11.44,-156	0/1:-52,-6.62,-72	0/1:-156,-16.86,-156	0/1:-82,-12.04,-143.9	0/1:-100,-15.05,-180	0/0:-0,-6.62,-132	0/0:-0,-6.62,-132	0/0:-0,-11.44,-228	0/1:-162,-18.06,-168	0/1:-72,-7.83,-72	0/0:-0,-13.85,-276	0/0:-0,-7.22,-144	0/0:-0,-12.04,-240	0/1:-70,-10.24,-119.8	0/1:-62,-11.44,-156	0/1:-150,-16.26,-144	0/0:-0,-13.85,-276	0/1:-94,-8.43,-60	0/0:-0,-7.22,-141	0/0:-0,-13.25,-264	1/1:-251.11,-16.86,-1.81	0/1:-40,-10.84,-168	0/1:-186,-22.28,-228	0/1:-74,-10.24,-120	0/1:-180,-15.05,-96	0/0:-0,-11.44,-228	0/0:-0,-7.83,-156	0/0:-0,-12.64,-252
chr5	88643977	G	<INS:ME:Bov-A2>	PASS	TSD=null;ASSESS=3;INTERNAL=NM_001192905.1,INTRONIC;SVTYPE=Bov-A2;SVLEN=267;MEINFO=Bov-A2,1,268,-;DIFF=0.86:c46t,a53g,c103t,g112a,c161g,g198t,g209a,g213a,c230t,c255t;LP=47;RP=5;RA=3.233;PRIOR=false;SR=4	0/0:-0,-10.84,-216	0/0:-0,-13.25,-264	0/0:-0.6,-13.85,-264.6	0/0:-0,-9.03,-180	0/0:-0,-12.64,-252	0/0:-0.6,-9.03,-168.6	0/0:-0,-13.85,-276	0/0:-0,-10.24,-204	0/0:-0,-16.26,-324	0/0:-0,-12.04,-240	0/0:-0.6,-10.84,-204.6	0/1:-36,-5.42,-72	0/0:-0.6,-21.07,-406.6	0/0:-0,-12.04,-240	0/0:-0,-7.22,-144	0/0:-0,-3.61,-72	0/0:-0,-9.63,-192	0/0:-0,-9.03,-180	0/0:-0,-10.24,-204	0/0:-0,-10.84,-216	0/0:-0,-18.06,-360	0/0:-0,-7.83,-156	0/0:-0,-10.84,-216	0/0:-0,-4.82,-96	0/0:-0,-13.25,-264	0/0:-0.6,-13.25,-252.6	0/0:-0,-12.64,-252	0/0:-0.6,-12.04,-228.6	0/0:-0,-12.04,-240	0/0:-0,-10.24,-204	0/0:-0.6,-8.43,-154.6	0/0:-0.6,-9.63,-180.6	0/0:-0,-9.03,-180	0/0:-0,-10.84,-216	0/0:-0,-12.04,-240	0/0:-0,-6.62,-132	0/0:-0.6,-6.02,-108.6	0/0:-0,-6.62,-131.4
chr5	88658917	A	<INS:ME:Bov-A2>	PASS	TSD=null;ASSESS=3;INTERNAL=NM_001192905.1,TERMINATOR;SVTYPE=Bov-A2;SVLEN=268;MEINFO=Bov-A2,1,269,-;DIFF=0.97:c32g,t38c,g39a,c54t,c74t,c103t,g112a,t129c,g193t,g198a,g200a,g202a,g211a,c218a,t222c,c263t,n266-269;LP=115;RP=116;RA=-0.012;PRIOR=false;SR=51	0/0:-0,-13.85,-276	0/0:-0,-10.84,-216	0/0:-0,-18.66,-370	1/1:-221.2,-14.45,-1.21	0/1:-119.5,-15.05,-156.01	0/0:-0,-11.44,-228	0/1:-170,-15.65,-120	0/0:-0,-12.64,-252	0/1:-247.4,-25.89,-228	0/0:-0,-6.02,-120	0/0:-0.13,-14.45,-282.6	0/1:-40,-10.24,-156	0/1:-110.1,-11.44,-91.3	0/1:-122,-16.26,-180	0/0:-0,-12.64,-251.8	0/0:-0,-6.02,-120	1/1:-145.2,-9.63,-1.2	0/0:-0,-3.61,-72	0/1:-146,-18.06,-192	0/1:-50,-6.02,-60	0/1:-100.7,-12.64,-127	0/0:-0,-3.61,-72	0/1:-176,-14.45,-84	0/1:-40,-9.63,-144	0/1:-112,-10.24,-72	0/0:-0,-8.43,-168	0/0:-0,-9.63,-192	0/0:-0,-8.43,-168	0/1:-161.9,-13.25,-72	0/0:-0,-12.04,-240	0/0:-0,-10.24,-204	0/1:-89.9,-19.27,-276	0/0:-0,-15.05,-300	0/0:-0,-13.85,-276	0/0:-0,-7.83,-156	0/0:-0,-13.85,-276	0/1:-162,-15.65,-120	0/1:-72,-8.43,-84
chr5	88756903	C	<INS:ME:Bov-A2>	PASS	TSD=null;ASSESS=4;INTERNAL=XM_024991470.1,PROMOTER;SVTYPE=Bov-A2;SVLEN=267;MEINFO=Bov-A2,1,268,-;DIFF=0.95:g7a,c9a,c17a,a29g,c30t,a42g,t50g,t67a,a91g,a94g,n112,d114,n117,c123g,t133g,a160g,c218a,g219a,g231a,n269-269;LP=102;RP=106;RA=-0.055;PRIOR=false;SR=9	0/0:-0,-12.64,-243.1	0/0:-0,-13.85,-258.3	0/0:-0,-13.25,-262.7	0/0:-0,-13.25,-260.3	0/1:-62,-15.05,-221.3	0/1:-70,-16.26,-230	0/0:-1.22,-13.25,-222.9	0/0:-0,-10.84,-214.3	0/1:-100.2,-16.86,-195.5	0/1:-57.5,-9.63,-97.6	0/1:-70,-11.44,-124.4	0/0:-0,-4.21,-84	0/1:-96,-16.86,-204.8	0/1:-130,-19.27,-210.8	0/1:-41.3,-12.64,-186.3	0/0:-1.2,-7.22,-100.9	0/0:-0,-5.42,-106	0/0:-0.6,-8.43,-150.6	0/0:-0,-12.64,-249.3	0/0:-0.6,-7.22,-130.9	0/0:-0,-10.24,-202.3	0/0:-0.72,-7.83,-126.6	0/1:-131,-15.65,-153.13	0/0:-0,-6.02,-114.5	0/0:-0,-8.43,-161.9	0/0:-0.43,-10.84,-197.7	0/0:-1.81,-15.65,-262.51	0/1:-30,-8.43,-121.7	0/0:-0,-14.45,-282	0/1:-45.6,-12.64,-179.9	0/0:-0.61,-7.83,-134.5	0/1:-71.4,-13.25,-170.8	0/1:-52,-15.05,-228.8	0/1:-40.03,-13.25,-203.2	0/0:-0,-12.64,-252	0/1:-72.3,-10.24,-110	0/0:-0,-13.25,-261.5	0/0:-0,-4.21,-84
chr5	91679260	T	<INS:ME:Bov-A2>	PASS	TSD=null;ASSESS=4;INTERNAL=NM_001206512.1,INTRONIC;SVTYPE=Bov-A2;SVLEN=256;MEINFO=Bov-A2,12,268,-;DIFF=0.85:n1-11,c17a,a41c,c54t,c87g,a92g,g93c,g98a,g110a,c111t,t142c,g200a,g211a,g219a,g241a,c246t,c255t;LP=1;RP=8;RA=-3;PRIOR=false;SR=4	0/0:-0.6,-12.64,-238.6	0/0:-0,-10.84,-216	0/0:-0,-14.45,-287.1	0/0:-0,-1.2,-24	0/0:-0.01,-11.44,-223.8	0/0:-0,-15.05,-300	0/0:-0,-7.83,-154.3	0/0:-0,-13.25,-264	0/0:-0,-10.24,-204	0/0:-0,-7.83,-156	0/0:-0,-7.83,-154	0/0:-0,-13.85,-276	0/1:-82,-10.84,-132	0/0:-0.6,-13.85,-259.8	0/0:-0,-7.83,-156	0/0:-0,-8.43,-168	0/0:-0,-7.83,-156	0/0:-0,-3.61,-72	0/1:-69.6,-12.04,-166	0/0:-0,-6.62,-132	0/0:-1.2,-9.63,-159.8	0/0:-1.2,-1.2,-1.2	0/0:-0,-1.81,-34	0/0:-0,-7.83,-156	0/0:-1.2,-10.24,-181.2	0/0:-0,-5.42,-108	0/0:-0,-12.64,-252	0/0:-0,-13.85,-276	0/0:-0,-12.04,-236.1	0/0:-0.6,-9.03,-167.1	0/0:-0,-6.62,-132	0/0:-0,-21.07,-420	0/0:-0,-7.22,-143	0/0:-0,-13.85,-276	0/0:-0,-7.83,-156	0/0:-0,-9.63,-192	0/0:-1.2,-7.83,-130.1	0/0:-0,-12.04,-240
chr5	92932167	C	<INS:ME:Bov-A2>	PASS	TSD=null;ASSESS=3;INTERNAL=null,null;SVTYPE=Bov-A2;SVLEN=251;MEINFO=Bov-A2,18,269,-;DIFF=0.82:n1-3,c9a,c17a,t28c,t31a,a42c,c54g,g73a,i75a,t90a,g95a,c97t,g99t,c101t,c103g,n129-141,a146c,t171c,g172a,t173c,t174a,g185c,g193t,c197g,g200a,g211a,g216a,c218a,t222c,c234a,n238-269;LP=1;RP=9;RA=-3.17;PRIOR=false;SR=4	0/0:-0,-9.03,-174	0/0:-0.61,-6.62,-108.7	0/0:-0,-8.43,-165.3	0/1:-62,-7.22,-72	0/0:-0,-9.63,-191	0/0:-0,-9.03,-175.3	0/0:-0,-10.84,-213.2	0/0:-0,-7.22,-142.1	0/0:-0,-12.04,-237.1	0/0:-0.18,-10.24,-176.1	0/0:-0,-11.44,-228	0/0:-0,-5.42,-108	0/0:-0.01,-19.87,-389.8	0/0:-0,-11.44,-220.4	0/0:-0.03,-8.43,-160.8	0/0:-0,-4.82,-94	0/0:-0,-2.41,-48	0/0:-0,-10.24,-204	0/0:-0,-7.22,-140.2	0/0:-0,-5.42,-108	0/0:-0,-9.63,-188	0/0:-0,-6.62,-129.5	0/0:-0,-10.84,-212.8	0/0:-0,-10.24,-198	0/0:-0,-4.21,-84	0/0:-0,-9.63,-189.4	0/0:-0,-12.04,-239.6	0/0:-0,-12.64,-244	0/0:-0,-10.24,-204	0/0:-0,-13.25,-260	0/0:-0,-7.22,-142.1	0/0:-0,-13.25,-260.4	0/0:-0,-12.04,-239.3	0/0:-0,-9.63,-192	0/0:-0,-11.44,-226	0/0:-0,-7.83,-156	0/0:-0,-9.03,-179.4	0/0:-0,-10.84,-216
chr5	94102187	T	<INS:ME:Bov-A2>	PASS	TSD=null;ASSESS=4;INTERNAL=null,null;SVTYPE=Bov-A2;SVLEN=269;MEINFO=Bov-A2,0,269,+;DIFF=1:c17t,c30t,c54t,a68g,t142c,a196g,g198a,g201a,c217a,g231a,g238a,c244t,g247t,c255t;LP=75;RP=64;RA=0.229;PRIOR=false;SR=28	0/0:-0.03,-15.65,-307.2	0/0:-0,-10.24,-200	0/0:-0,-13.25,-263.4	0/1:-132,-17.46,-192	0/1:-92.6,-13.25,-154	0/0:-0,-12.64,-252	0/0:-0,-14.45,-288	0/0:-0,-13.25,-264	0/0:-0,-21.07,-416.6	0/0:-0,-8.43,-168	0/0:-0,-14.45,-286.8	0/0:-0,-4.82,-96	0/0:-0,-15.05,-299.4	0/0:-0,-12.64,-252	0/0:-0,-9.63,-192	0/0:-0,-7.22,-144	0/1:-102,-10.84,-96	0/0:-0,-11.44,-228	0/0:-0,-15.05,-300	0/0:-0,-7.22,-144	0/1:-127.3,-13.85,-116.02	0/0:-0,-7.83,-156	0/0:-0,-10.24,-204	0/1:-30,-8.43,-126	0/0:-0,-8.43,-166	0/0:-0,-7.22,-144	0/0:-0,-9.63,-191.3	0/0:-0,-6.62,-132	0/0:-0,-19.27,-382	1/1:-261.2,-16.86,-0.61	0/1:-106.2,-15.65,-164	1/1:-258.11,-17.46,-1.81	0/0:-0,-10.24,-204	0/0:-0,-13.85,-276	0/0:-0,-10.84,-216	1/1:-111,-7.22,-0.6	0/1:-165.8,-15.05,-106	0/1:-72,-10.24,-120
chr5	97059017	G	<INS:ME:Bov-A2>	PASS	TSD=AAAAAGCTGAGTAAG;ASSESS=5;INTERNAL=NM_001101180.1,PROMOTER;SVTYPE=Bov-A2;SVLEN=269;MEINFO=Bov-A2,0,269,+;DIFF=1:c54t,g66a,t67a,a91g,a94g,g112a,c117g,a118c,c161g,g204c,g231a,g254a,c255t,c263t,c266t;LP=22;RP=19;RA=0.212;PRIOR=false;SR=21	0/0:-0,-13.85,-265.1	0/0:-0,-4.21,-84	0/0:-0,-14.45,-282.5	0/0:-0,-7.83,-156	0/0:-0,-7.83,-154.2	0/0:-0,-12.64,-247.2	0/0:-0,-15.05,-292	0/0:-0,-11.44,-224.4	0/0:-0,-12.64,-244.3	0/0:-0,-7.83,-156	0/0:-0,-11.44,-228	0/0:-0,-7.22,-144	0/0:-0,-11.44,-220.3	0/0:-0,-15.65,-306.4	0/0:-0,-10.24,-203.5	0/0:-0,-7.83,-156	0/1:-44,-9.63,-136	0/0:-0,-6.62,-132	0/0:-0,-17.46,-338.2	0/1:-78,-14.45,-192	0/0:-0,-12.04,-240	0/0:-0,-3.61,-72	0/0:-0,-8.43,-166	0/0:-0,-12.64,-250	0/0:-0,-7.22,-144	0/0:-0,-9.03,-180	0/0:-0,-12.04,-240	0/0:-0,-7.22,-142	0/0:-0,-7.83,-156	0/0:-0,-15.05,-291.2	0/0:-0,-7.83,-154	0/0:-0,-11.44,-223	0/0:-0,-9.03,-178.4	0/0:-0,-12.64,-250	0/0:-0,-14.45,-285.1	0/0:-0,-12.04,-240	0/1:-52,-10.84,-142	0/0:-0,-6.62,-132
chr5	98923137	T	<INS:ME:Bov-A2>	PASS	TSD=ATTTTTTTT;ASSESS=5;INTERNAL=XM_024991666.1,INTRONIC;SVTYPE=Bov-A2;SVLEN=252;MEINFO=Bov-A2,16,268,+;DIFF=0.74:n1-15,t28c,n38,a42g,a44g,a68g,c87t,t90a,a91g,g98a,a118c,a137c,g172a,g178a,g183a,c197t,g200t,c218t,g228a,g231a,g241a;LP=14;RP=24;RA=-0.778;PRIOR=false;SR=8	0/0:-1.81,-15.05,-263.31	0/1:-20,-6.62,-102	0/0:-0.6,-12.04,-224	0/1:-81.8,-10.84,-112.17	0/1:-64,-10.24,-130	0/0:-1.2,-15.05,-267.8	0/0:-0.6,-14.45,-272.6	0/1:-82,-12.04,-144	0/0:-0,-12.04,-240	0/1:-76,-9.63,-103.6	0/1:-20,-6.62,-100.8	0/0:-0.6,-6.02,-106.6	0/1:-110,-10.84,-88	0/0:-0.6,-11.44,-203.4	0/1:-42,-7.22,-94	0/0:-0.6,-4.82,-84.6	0/1:-105.6,-10.84,-92	0/1:-20,-6.02,-94	0/0:-0.6,-12.64,-236.6	0/1:-93.9,-10.84,-99.4	0/1:-62,-12.64,-169.2	0/1:-30,-9.63,-154	0/0:-0,-4.82,-96	0/1:-60,-7.83,-82	0/1:-84,-12.04,-136	0/1:-115.8,-15.05,-156	0/0:-1.2,-14.45,-262.2	0/0:-0.6,-6.02,-107.9	0/1:-51.63,-11.44,-159.6	0/0:-1.21,-14.45,-254.6	0/0:-1.2,-10.84,-187.2	0/0:-1.2,-13.25,-237.1	0/0:-1.2,-13.85,-248.8	0/0:-0,-10.84,-210.1	0/1:-107,-15.05,-167.6	0/1:-52,-7.22,-79.1	0/0:-1.2,-7.22,-121.2	0/0:-1.2,-8.43,-141.2
chr5	99665751	T	<INS:ME:Bov-A2>	PASS	TSD=null;ASSESS=3;INTERNAL=XM_015471264.2,PROMOTER;SVTYPE=Bov-A2;SVLEN=268;MEINFO=Bov-A2,1,269,-;DIFF=0.98:n1,c30t,t33c,g55a,t67a,a91g,a94g,g98a,a146g,c190t,g198a,c205t,g219a,i223a,g231a,g241a,g251a,c255t,n265,n267-269;LP=28;RP=138;RA=-2.301;PRIOR=false;SR=49	0/0:-0,-13.85,-276	0/0:-0,-5.42,-108	0/0:-0,-10.24,-204	0/0:-0,-3.61,-72	1/1:-128.7,-8.43,-1.29	0/1:-79.1,-10.84,-132	0/1:-66,-12.04,-168	0/0:-0,-11.44,-228	1/1:-200.6,-12.64,-0.6	0/1:-95.7,-9.03,-72	0/1:-64,-8.43,-96	0/1:-72,-10.24,-120	0/0:-0,-14.45,-288	0/1:-84,-11.44,-132	0/1:-110.2,-15.05,-168	0/1:-40,-7.22,-96	0/0:-0.6,-8.43,-156.6	0/1:-30,-6.62,-96	0/1:-62,-9.63,-120	0/1:-94,-9.03,-72	1/1:-102.6,-6.62,-0.05	0/0:-0,-6.02,-120	0/1:-40,-4.21,-36	0/0:-0,-10.84,-216	0/0:-0,-10.24,-204	0/0:-0,-4.82,-96	0/1:-90.1,-12.04,-132	0/0:-0,-9.63,-190	0/1:-75.9,-9.63,-96	0/1:-58.8,-10.24,-132	0/0:-0,-8.43,-168	0/0:-0,-12.64,-252	1/1:-130.6,-7.83,-0.6	0/1:-70.6,-9.03,-96	1/1:-90.5,-6.02,-0.6	0/0:-0,-4.82,-96	0/1:-71.6,-7.22,-60	0/0:-0,-10.24,-204
chr5	99743900	A	<INS:ME:Bov-A2>	PASS	TSD=AAAAACTCA;ASSESS=5;INTERNAL=XM_005207088.4,INTRONIC;SVTYPE=Bov-A2;SVLEN=266;MEINFO=Bov-A2,2,268,+;DIFF=0.68:n1,n5,a10t,n20,c54t,t67a,g76a,t90a,c111t,c175t,g231a,c240t,c246t,g265a;LP=6;RP=3;RA=1;PRIOR=false;SR=12	0/0:-0.6,-15.05,-288	0/0:-0,-8.43,-153.6	0/0:-0,-14.45,-283.9	0/0:-0.6,-9.03,-167.8	0/0:-0,-8.43,-164.9	0/0:-1.21,-9.63,-160.7	0/0:-0,-17.46,-343.4	0/0:-0,-21.07,-413.6	0/1:-128,-16.26,-190	0/0:-0,-6.02,-115.1	0/0:-0,-12.04,-238.1	0/0:-0,-7.83,-146	0/0:-0,-14.45,-280.2	0/0:-0,-11.44,-227.6	0/0:-0,-15.65,-298.6	0/0:-0,-3.61,-72	0/0:-0,-8.43,-160.7	0/0:-0,-7.83,-153.2	0/0:-0,-16.26,-320.4	0/0:-0,-9.63,-182.7	0/0:-0.03,-16.26,-317.2	0/0:-0,-6.62,-129.5	0/0:-0,-6.02,-116	0/0:-0.61,-8.43,-140.2	0/0:-0,-9.03,-165.3	0/0:-0,-12.04,-230.2	0/0:-0,-10.84,-215.9	0/0:-0,-9.63,-189.3	0/0:-0,-15.65,-308.6	0/0:-0,-13.25,-264	0/0:-0.6,-4.82,-82	0/0:-0,-12.04,-238	0/0:-0,-24.08,-476.4	0/0:-0,-13.25,-264	0/0:-0,-6.62,-132	0/0:-0.6,-6.02,-108.6	0/0:-0,-7.22,-134	0/0:-0,-7.22,-144
chr5	102094491	T	<INS:ME:Bov-A2>	PASS	TSD=null;ASSESS=4;INTERNAL=XR_003034832.1,INTRONIC;SVTYPE=Bov-A2;SVLEN=267;MEINFO=Bov-A2,1,268,-;DIFF=0.77:g55a,g59a,a60g,a68g,g69t,a75g,g76a,c78t,c87t,t90a,c218t,a223c,c255t;LP=9;RP=11;RA=-0.29;PRIOR=false;SR=12	0/0:-0,-9.63,-191.9	0/0:-1.67,-18.06,-288.1	0/0:-0.12,-10.84,-196.7	0/0:-0.01,-17.46,-333.1	0/0:-0.7,-12.64,-228.2	0/0:-1.47,-15.65,-262.3	0/0:-1.2,-17.46,-314.4	0/0:-1.2,-21.07,-393.7	0/0:-5.08,-21.67,-316.51	0/0:-1.4,-16.26,-267.6	0/0:-1.92,-24.08,-417.41	0/0:-2.06,-22.28,-347.51	0/0:-0.73,-17.46,-272.4	0/0:-1.2,-15.05,-271.7	0/0:-0.6,-9.63,-169.9	0/0:-0.6,-8.43,-147.6	0/0:-0,-7.83,-145.2	0/0:-2.4,-15.05,-263.7	0/0:-1.22,-15.05,-250.4	0/0:-1.16,-13.85,-252.7	0/0:-1.93,-16.26,-260.21	0/0:-0,-3.61,-71	0/1:-36.92,-6.02,-36.22	0/0:-0.47,-18.06,-324.5	0/1:-15.09,-13.25,-183.87	0/0:-0.99,-16.26,-251.9	0/0:-0.03,-9.63,-181.4	0/0:-0,-7.83,-156	0/0:-2.68,-21.07,-310.41	0/0:-0.86,-10.84,-193.3	0/1:-32.61,-13.25,-180.89	0/0:-1.69,-16.26,-258.2	0/0:-2.45,-16.86,-258.21	0/0:-1.17,-14.45,-226.2	0/0:-1.81,-14.45,-248.71	0/1:-28,-5.42,-56.77	0/0:-5.5,-13.85,-185.6	0/0:-1.2,-9.03,-148.9
chr5	102209534	G	<INS:ME:Bov-A2>	PASS	TSD=null;ASSESS=4;INTERNAL=XM_024991562.1,PROMOTER;SVTYPE=Bov-A2;SVLEN=265;MEINFO=Bov-A2,4,269,+;DIFF=0.99:n1-3,c20t,g27c,c54t,a60g,i91a,c101t,g104a,g198a,c205a,g208t,g219a,c234t,g241a,c255t,c266t;LP=34;RP=25;RA=0.444;PRIOR=false;SR=15	0/0:-0,-12.04,-240	0/1:-153,-13.25,-60.44	0/0:-0,-12.64,-250.3	0/0:-0,-7.83,-156	0/1:-95.8,-9.03,-56.3	0/0:-0,-15.05,-300	0/0:-0,-9.63,-192	0/0:-0,-13.85,-276	0/0:-0,-10.24,-204	0/0:-0,-8.43,-168	0/0:-0,-18.06,-360	0/0:-0,-11.44,-228	0/0:-0,-14.45,-286	0/0:-0.6,-10.24,-192.6	0/0:-0,-9.63,-192	0/0:-0,-9.03,-178	1/1:-274.1,-16.86,-0	0/0:-0,-6.62,-130	0/0:-0,-14.45,-288	0/1:-70.7,-8.43,-84	0/0:-0.6,-12.04,-228.6	0/0:-0,-4.82,-95.9	0/0:-0,-6.62,-132	0/0:-0,-13.85,-274	0/0:-0,-6.02,-120	0/0:-0.01,-14.45,-280.2	0/0:-0,-9.03,-180	0/0:-0,-10.24,-204	0/0:-0,-12.04,-240	0/0:-0,-12.64,-252	0/0:-0,-8.43,-168	0/0:-0,-12.04,-240	0/0:-0,-10.84,-216	0/0:-0,-6.62,-130.7	0/0:-0,-11.44,-228	0/0:-0,-7.22,-143.6	0/1:-80.2,-10.84,-120	0/0:-0,-8.43,-168
chr5	102659327	G	<INS:ME:Bov-A2>	PASS	TSD=null;ASSESS=3;INTERNAL=NM_001190424.1,INTRONIC;SVTYPE=Bov-A2;SVLEN=266;MEINFO=Bov-A2,2,268,+;DIFF=0.22:n1,c17a,c30t,g35a,c54t,g55a,g59t,n66-141,t171c,g172a,c180a,g185a,g193t,g198a,g200a,n216-269;LP=2;RP=1;RA=1;PRIOR=false;SR=13	0/0:-1.81,-13.85,-234.41	0/1:-72.03,-16.86,-255.1	0/1:-84,-31.31,-532.3	0/0:-1.81,-14.45,-252.81	0/0:-3.01,-31.31,-562.31	0/0:-0,-25.29,-499	0/0:-0,-16.86,-330.5	0/0:-1.2,-30.1,-574.4	0/0:-3.61,-48.77,-896.31	0/0:-2.41,-23.48,-419.01	0/0:-0.77,-26.49,-503.3	0/1:-129.56,-25.29,-363.6	0/0:-2.41,-34.92,-617.51	0/0:-1.81,-24.08,-442.01	0/1:-60,-20.47,-344.4	0/0:-1.2,-12.04,-217.2	0/0:-0.6,-14.45,-272.9	0/0:-1.2,-25.89,-490.4	0/1:-120,-38.53,-644.1	0/0:-0,-31.91,-632.4	0/0:-1.2,-29.5,-561	0/0:-1.2,-11.44,-202.1	0/1:-72,-17.46,-275	0/1:-57.9,-12.04,-178.1	0/1:-70,-17.46,-273.8	0/1:-132,-24.68,-355.5	0/1:-48,-12.64,-202.8	0/0:-1.2,-13.25,-237.9	0/0:-4.21,-41.54,-735.41	0/0:-1.81,-21.07,-382.61	0/0:-2.71,-20.47,-349.11	0/0:-1.21,-44.55,-855.8	0/0:-1.2,-24.68,-467	0/1:-119.01,-33.72,-538	0/0:-0.6,-22.28,-431.2	0/0:-0,-5.42,-108	0/0:-0.6,-21.67,-415.4	0/0:-1.2,-13.25,-241
chr5	102780265	T	<INS:ME:Bov-A2>	PASS	TSD=null;ASSESS=4;INTERNAL=null,null;SVTYPE=Bov-A2;SVLEN=269;MEINFO=Bov-A2,0,269,+;DIFF=0.99:c17a,c54t,g66c,g69a,g88c,a91g,a94g,g98a,c130t,a131g,c165t,g209a,g211t,c255t,n266,n268-269;LP=138;RP=101;RA=0.45;PRIOR=false;SR=55	0/1:-30.1,-18.06,-283.18	0/1:-69.88,-24.08,-259.96	0/1:-35.5,-28.9,-484.7	0/1:-40.8,-7.83,-71.69	0/1:-94.77,-32.51,-448.33	0/0:-1.81,-31.91,-597.21	0/1:-66.11,-29.5,-433.33	0/0:-0,-30.1,-587.3	0/1:-83.07,-56.59,-945.57	0/0:-1.25,-27.09,-500.6	0/0:-2.41,-33.72,-618.61	0/0:-0.69,-25.89,-469.9	0/0:-0,-33.11,-620.8	0/1:-97.78,-31.31,-387.05	0/1:-33.48,-21.67,-281.96	0/1:-33.5,-10.24,-132.54	0/1:-75.3,-20.47,-296.76	0/1:-64.3,-15.05,-196.95	0/1:-54.7,-34.32,-580.83	0/0:-0,-13.25,-259.3	0/1:-85.69,-40.94,-627.14	0/0:-0,-6.02,-118	0/1:-12.6,-4.82,-61.3	0/0:-0,-18.66,-362.3	0/1:-83,-25.29,-353.48	0/0:-0.98,-36.73,-658.2	0/1:-102.2,-24.68,-288.42	0/1:-47.5,-21.67,-324.24	0/0:-4.37,-53.58,-929.51	0/0:-2.41,-26.49,-478.31	0/0:-1.2,-21.67,-375.1	0/1:-56.41,-42.75,-723.99	0/1:-68.4,-28.3,-448.43	0/1:-85.02,-29.5,-369.42	0/1:-62.7,-12.04,-120.43	0/0:-0.6,-11.44,-215.7	0/1:-87.57,-23.48,-278.47	0/0:-0,-16.26,-322.4
chr5	102801857	C	<INS:ME:Bov-A2>	PASS	TSD=AAATCTATCC;ASSESS=5;INTERNAL=XM_024992677.1,TERMINATOR;SVTYPE=Bov-A2;SVLEN=269;MEINFO=Bov-A2,0,269,-;DIFF=1:i41a,g51a,c54t,g61a,c87t,n91,g139a,t142c,g144a,c197t,g200c,g201a,g219a,g241a,c244t,g247t;LP=28;RP=45;RA=-0.684;PRIOR=false;SR=21	0/0:-0.01,-16.86,-317.5	0/0:-0.03,-14.45,-269.5	0/0:-0.35,-22.28,-406.8	0/0:-1.81,-15.65,-273.11	0/0:-0.3,-27.09,-517.7	0/0:-2.42,-20.47,-346.31	0/0:-0.03,-19.87,-369.5	0/0:-0,-26.49,-528	0/0:-0.61,-43.35,-833.4	0/0:-0.13,-24.08,-453.2	0/0:-0,-28.9,-551.8	0/0:-0.36,-12.64,-233.4	0/0:-0,-36.73,-729.4	0/0:-0.73,-25.89,-458.2	0/0:-0,-8.43,-158.3	0/0:-1.51,-13.25,-219.2	0/0:-0,-19.87,-395.8	0/0:-0,-21.67,-430	0/1:-71.9,-28.3,-432.49	0/0:-0,-18.06,-359.9	0/0:-0.09,-37.33,-695.5	0/0:-0,-4.21,-82	0/1:-43.4,-15.65,-237.39	0/0:-0,-15.65,-310	0/0:-0,-25.89,-510.4	0/0:-1.81,-28.9,-535.31	0/0:-0.01,-15.65,-286.5	0/0:-0.04,-18.06,-332.6	0/0:-0,-49.37,-978.7	0/0:-0,-24.68,-489.1	0/1:-99.42,-15.05,-97.36	0/0:-3.01,-36.73,-669.21	0/0:-0.07,-23.48,-445.3	0/0:-0.07,-16.86,-314.9	0/1:-74.5,-21.07,-291.43	0/0:-1.2,-7.83,-133.2	0/1:-80.1,-18.06,-217.84	0/0:-1.81,-16.26,-289.81
chr5	102803979	C	<INS:ME:Bov-A2>	PASS	TSD=AGAAGATGGGC;ASSESS=5;INTERNAL=XM_024992677.1,INTRONIC;SVTYPE=Bov-A2;SVLEN=269;MEINFO=Bov-A2,0,269,-;DIFF=1:a11t,c54t,t64c,g84a,g88a,a91c,c101t,c103g,t133c,g147a,g172a,g208a,g219a,g231a,c240t,c246t,c255t;LP=172;RP=200;RA=-0.218;PRIOR=false;SR=87	0/1:-125.5,-23.48,-300.05	0/1:-131.03,-30.1,-342.96	0/0:-3.01,-28.9,-518.81	0/1:-194.9,-24.68,-239.95	0/1:-129.2,-46.96,-751.7	0/1:-130.06,-32.51,-452.11	0/1:-160.51,-33.11,-411.75	0/0:-0,-27.09,-538	0/1:-130.8,-58.4,-954.86	0/1:-161.8,-34.32,-432.8	0/1:-85.6,-32.51,-500.9	0/0:-0.12,-19.27,-352.6	0/0:-1.2,-34.32,-641.5	0/1:-183.5,-34.32,-420.7	0/1:-53.7,-18.06,-255.4	0/1:-65.6,-18.66,-265.05	0/1:-87.2,-25.29,-396.69	0/1:-163.6,-34.32,-445.51	0/1:-100.06,-37.93,-611.3	0/0:-0,-19.27,-384	0/1:-188.2,-47.56,-683.95	0/0:-0,-6.62,-130	0/1:-63.2,-20.47,-304.95	0/0:-0,-22.88,-446.7	0/1:-107.7,-27.09,-372.94	0/0:-0.25,-25.89,-481.1	0/1:-131.7,-24.08,-300.04	0/1:-200.5,-25.29,-228.2	0/1:-153.86,-55.39,-872.76	0/1:-97.5,-26.49,-408.01	0/0:-0.61,-13.85,-239.1	0/1:-147.6,-45.15,-699.57	0/1:-107.3,-30.71,-480.02	0/1:-227.5,-41.54,-481.77	0/1:-56.8,-18.66,-273.93	0/0:-0,-9.63,-191.8	0/1:-173.74,-30.1,-299.49	0/0:-0.03,-13.85,-268.1
chr5	106794041	G	<INS:ME:Bov-A2>	PASS	TSD=0tsd;ASSESS=5;INTERNAL=XM_010805630.3,INTRONIC;SVTYPE=Bov-A2;SVLEN=267;MEINFO=Bov-A2,1,268,-;DIFF=0.38:c9a,c15t,c17a,c30t,c54t,g55a,c79t,a80g,n85,g88a,t90a,a91c,n112-185,g193t,g198a,g200a,c218a,a223g,n253-269;LP=6;RP=3;RA=1;PRIOR=false;SR=7	0/0:-0,-11.44,-228	0/1:-108,-9.63,-65	0/0:-0,-15.05,-299.5	0/1:-60,-10.84,-153.6	0/0:-0,-18.66,-370.8	0/0:-0,-14.45,-288	0/0:-0,-9.03,-178	0/0:-0,-9.03,-180	0/0:-0,-16.86,-336	0/0:-0,-8.43,-165	0/0:-0,-12.04,-239.2	0/1:-24,-3.01,-34	0/0:-0,-12.04,-239.2	0/0:-0,-12.64,-252	0/0:-0,-6.62,-128	0/0:-0,-6.62,-132	0/1:-106,-12.64,-140.5	0/0:-0.6,-10.24,-188.6	0/0:-0,-11.44,-228	0/0:-0,-7.83,-156	0/0:-0,-10.24,-204	0/0:-0,-6.62,-132	0/1:-94.9,-16.26,-227.2	0/0:-0,-2.41,-44	0/1:-82.01,-10.24,-112.5	0/0:-0,-12.64,-252	0/0:-0,-12.64,-251.4	0/0:-0,-7.83,-156	0/1:-32.7,-12.04,-201.6	0/0:-0,-13.85,-276	0/0:-1.2,-7.83,-129.2	0/0:-0,-11.44,-228	0/0:-0,-14.45,-288	0/0:-0,-13.85,-274	0/1:-57.2,-12.64,-191.4	0/0:-0.6,-4.21,-71.7	0/0:-0.6,-6.02,-106.1	0/0:-0,-9.03,-180
chr5	115832783	C	<INS:ME:Bov-A2>	PASS	TSD=CCAGGC;ASSESS=5;INTERNAL=NM_001038191.2,TERMINATOR;SVTYPE=Bov-A2;SVLEN=267;MEINFO=Bov-A2,1,268,+;DIFF=0.83:a6g,c9g,c15t,c17a,a29g,c30t,g55a,a68g,g73a,c87t,n90,c97t,c101t,g112a,a131t,t134g,a149g,a152g,c158t,g185a,g193t,g198a,g200a,g216a,c218a,t222c,c230t,n234,c240t,c244t,n253-269;LP=21;RP=19;RA=0.144;PRIOR=false;SR=19	0/0:-0,-6.62,-132	0/1:-55.9,-10.24,-130.13	0/0:-0,-13.25,-263.5	0/1:-53.9,-16.26,-253.3	0/0:-0,-9.63,-192	0/0:-0,-11.44,-228	0/0:-0,-13.85,-276	0/0:-0,-11.44,-228	0/0:-0,-19.27,-383.5	0/0:-0,-9.63,-192	0/0:-0,-16.26,-322.8	1/1:-20,-1.2,-0	0/0:-0,-11.44,-227.2	0/0:-0,-13.85,-275.5	0/0:-0,-10.84,-216	0/0:-0,-5.42,-108	0/1:-76.36,-7.83,-51	0/0:-0,-9.03,-180	0/0:-0,-11.44,-228	0/1:-50.83,-6.62,-64.65	0/0:-0,-6.62,-132	0/0:-0,-8.43,-166	0/1:-81.1,-10.84,-120.04	0/1:-86.1,-7.22,-32.9	0/0:-0,-6.62,-132	0/1:-88.4,-10.24,-96	0/0:-0,-8.43,-168	0/0:-0,-10.24,-204	0/0:-0,-8.43,-166	0/0:-0,-10.24,-202	0/1:-32,-10.84,-180	0/0:-0,-14.45,-288	0/0:-0,-8.43,-168	0/0:-0,-12.04,-237	0/0:-0,-17.46,-348	0/1:-55.2,-6.02,-58	0/1:-57.6,-4.82,-24.04	0/0:-0,-3.01,-60
chr6	1754936	C	<INS:ME:Bov-A2>	PASS	TSD=null;ASSESS=3;INTERNAL=null,null;SVTYPE=Bov-A2;SVLEN=249;MEINFO=Bov-A2,19,268,+;DIFF=0.6:n1-18,c47t,g58a,g88a,t126a,g170a,g172a,g198t,g200a,g231a,g238c,c246t,a248g,c255t,a261t;LP=9;RP=6;RA=0.585;PRIOR=false;SR=5	0/1:-32.4,-4.82,-46.62	0/0:-0,-7.22,-138	0/0:-0,-9.03,-165	0/0:-0.6,-3.01,-48.6	0/0:-0,-7.22,-135.2	0/0:-0,-13.85,-254.1	0/0:-0,-6.02,-109.5	0/0:-0,-6.02,-116.6	0/0:-0,-7.83,-146	0/0:-0.6,-1.81,-22	0/0:-0.6,-11.44,-202.6	0/0:-0,-7.83,-156	0/0:-0,-11.44,-212.4	0/0:-0.6,-7.22,-126.6	0/0:-0,-8.43,-166	0/0:-0.6,-1.81,-23.4	0/0:-0,-8.43,-164.5	0/0:-0,-8.43,-164.5	0/0:-0,-3.61,-58.9	0/0:-0,-6.02,-118	0/1:-50.6,-8.43,-102.93	0/0:-0,-7.22,-144	0/0:-0,-6.62,-129.6	0/0:-0,-6.62,-129.9	0/0:-0,-3.61,-72	0/0:-0.6,-10.24,-183.8	0/0:-0.6,-3.01,-42.6	0/0:-0,-6.62,-125.6	0/0:-0.64,-4.21,-59.8	0/0:-0.05,-5.42,-97	0/0:-0,-3.61,-70	0/0:-0.69,-10.24,-179.1	0/0:-0,-7.83,-148.7	0/0:-0,-2.41,-40.6	0/1:-28.2,-3.61,-32.21	0/0:-0,-5.42,-105.5	0/1:-27.1,-6.02,-82.73	0/0:-0,-6.02,-120
chr6	4979504	T	<INS:ME:Bov-A2>	PASS	TSD=null;ASSESS=4;INTERNAL=null,null;SVTYPE=Bov-A2;SVLEN=255;MEINFO=Bov-A2,13,268,-;DIFF=0:n1-12,c17a,g35a,c48t,c54t,t67a,a91g,a94g,g98a,n112-269;LP=2;RP=1;RA=1;PRIOR=false;SR=7	0/0:-0,-12.64,-251.2	0/0:-0.01,-8.43,-150.7	0/0:-0,-10.24,-203.2	0/0:-0,-3.61,-69.7	0/0:-0,-6.02,-108.8	0/0:-0,-9.63,-185.9	0/0:-0,-12.64,-242.3	0/0:-0,-11.44,-220.4	0/0:-0,-14.45,-272.3	0/0:-0.09,-8.43,-151	0/0:-0,-10.24,-196.8	0/0:-0,-10.84,-206.4	0/0:-0,-10.84,-195.1	0/0:-0,-14.45,-280.4	0/0:-0.06,-11.44,-200	0/0:-0,-6.62,-127.3	0/0:-0,-4.82,-93.7	0/0:-0,-7.83,-143.8	0/0:-0,-16.26,-315.8	0/0:-0,-7.22,-140.7	0/0:-0,-10.84,-204.8	0/0:-0,-4.21,-83.5	0/0:-0,-3.61,-70	0/1:-30.6,-8.43,-130.13	0/0:-0,-11.44,-216.2	0/1:-75,-9.63,-91.11	0/0:-0,-13.25,-263.4	0/0:-0,-11.44,-218.8	0/0:-0,-12.04,-228.3	0/0:-0.01,-7.83,-144.5	0/0:-1.2,-11.44,-197.8	0/0:-0,-18.06,-346.2	0/0:-0,-13.85,-270.6	0/0:-0,-7.22,-140.7	0/0:-0,-8.43,-155.4	0/0:-0,-8.43,-159.9	0/0:-0.77,-10.24,-172.8	0/0:-0,-3.61,-68
chr6	7404297	C	<INS:ME:Bov-A2>	PASS	TSD=GGGGAATATAC;ASSESS=5;INTERNAL=null,null;SVTYPE=Bov-A2;SVLEN=267;MEINFO=Bov-A2,1,268,+;DIFF=0.99:c54t,g88a,t90g,g104a,a109t,t135c,g156a,g185a,a186t,g198a,g200c,g201a,g219a,c240t,n269;LP=58;RP=41;RA=0.5;PRIOR=false;SR=41	0/0:-0,-13.85,-276	0/0:-0,-6.62,-132	0/0:-0,-10.84,-216	0/1:-152,-12.04,-60	0/1:-134,-18.66,-216	0/0:-0,-16.26,-324	0/0:-0,-11.44,-227.4	0/0:-0,-13.25,-264	0/0:-0,-19.87,-396	0/0:-0,-8.43,-168	0/0:-0,-13.25,-264	0/1:-72,-7.22,-54	0/0:-0,-15.65,-312	0/0:-0,-13.25,-264	0/0:-0,-6.02,-118	0/0:-0,-9.03,-180	0/0:-0,-9.03,-180	0/0:-0,-6.62,-132	0/0:-0,-8.43,-168	0/1:-74,-8.43,-84	0/0:-0,-6.62,-132	0/0:-0,-3.01,-60	0/1:-74,-7.22,-60	0/1:-86,-10.84,-120	0/0:-0,-10.24,-204	0/0:-0,-13.85,-276	0/0:-0,-9.63,-192	0/1:-115.4,-14.45,-156	0/0:-0,-14.45,-288	0/0:-0,-10.24,-204	0/0:-0,-5.42,-108	0/1:-62,-10.24,-132	0/0:-0,-11.44,-228	0/1:-142,-18.06,-192	0/0:-0,-9.63,-192	0/1:-104,-11.44,-108	0/1:-166,-15.05,-108	0/0:-0,-6.02,-120
chr6	16645247	A	<INS:ME:Bov-A2>	PASS	TSD=AAAAAAAAA;ASSESS=5;INTERNAL=NM_001077092.1,PROMOTER;SVTYPE=Bov-A2;SVLEN=267;MEINFO=Bov-A2,1,268,-;DIFF=0.74:c9a,c17a,c20t,c24g,c30t,a42g,c63a,g66c,a68g,g73a,t81c,g82a,c87t,t90a,n129-142,c163t,c165t,g172a,c190t,g193t,g194t,g198a,g200a,c206a,t207a,g209c,n216-269;LP=31;RP=9;RA=1.784;PRIOR=false;SR=17	0/0:-0,-18.06,-360	0/0:-0.6,-8.43,-156.6	0/0:-0,-18.06,-358	0/0:-0,-10.24,-202	0/0:-0,-12.04,-238	0/0:-0,-9.03,-180	0/0:-0,-9.63,-192	0/0:-0,-12.64,-244.4	0/0:-0,-16.26,-321.1	0/0:-0.66,-11.44,-196.9	0/0:-0,-12.04,-240	0/0:-0.22,-10.24,-196.4	0/0:-0,-15.05,-297.1	0/0:-0,-10.24,-202	0/0:-0.6,-7.22,-123.7	0/0:-0,-9.03,-180	0/0:-0,-9.63,-192	0/0:-0,-3.61,-72	0/0:-0.6,-14.45,-276.6	0/0:-0,-6.02,-120	0/0:-0.01,-15.05,-291.8	0/0:-0,-3.61,-72	0/0:-0,-7.83,-156	0/1:-36,-10.84,-154.4	0/0:-0,-10.24,-197.6	0/0:-0.6,-12.64,-231.3	0/0:-0,-13.85,-275.4	0/0:-0.6,-6.62,-118.6	0/0:-0,-10.84,-216	0/0:-0.6,-12.04,-219.1	0/0:-0,-13.25,-255.9	0/0:-0,-12.64,-246	0/0:-0,-6.62,-131.5	0/0:-0,-9.03,-180	0/0:-0.61,-9.03,-164.7	0/0:-0.6,-9.03,-163	0/0:-0,-9.63,-190	0/0:-0,-4.21,-82
chr6	20050612	A	<INS:ME:Bov-A2>	PASS	TSD=AAAGATGTAATAATA;ASSESS=5;INTERNAL=null,null;SVTYPE=Bov-A2;SVLEN=269;MEINFO=Bov-A2,0,269,+;DIFF=0.47:c87t,g98a,c117g,c167g,g178t,n197-269;LP=13;RP=9;RA=0.531;PRIOR=false;SR=15	0/0:-0,-16.26,-319.9	0/0:-0,-4.21,-84	0/0:-0,-15.05,-294.5	0/0:-0,-12.04,-240	0/0:-0,-7.22,-144	0/0:-0,-10.24,-204	0/0:-0,-15.05,-299.8	0/0:-0,-10.24,-201.7	0/1:-68,-13.85,-200.5	0/0:-0,-5.42,-106	0/0:-0,-8.43,-168	0/0:-0,-9.03,-180	0/0:-0,-17.46,-348	0/0:-0,-6.02,-120	0/0:-0,-7.83,-156	0/0:-0,-2.41,-48	0/0:-0,-10.24,-204	0/0:-0,-9.03,-180	0/1:-96,-13.25,-154.2	0/1:-66,-9.63,-120	0/0:-0,-15.65,-312	0/0:-0,-9.03,-180	0/0:-0,-12.04,-240	0/0:-0,-9.63,-192	0/0:-0,-9.63,-192	0/0:-0,-6.02,-120	0/0:-0,-7.22,-144	0/0:-0,-14.45,-287.9	0/0:-0,-9.63,-192	0/0:-0,-8.43,-168	0/0:-0,-7.83,-156	0/0:-0.03,-13.85,-271.2	0/0:-0,-10.84,-216	0/0:-0,-12.64,-250	0/0:-0,-13.25,-264	0/0:-0,-7.22,-144	0/0:-0,-9.63,-192	0/0:-0,-7.22,-144
chr6	24567823	G	<INS:ME:Bov-A2>	PASS	TSD=AAAATAAGCCCTACTG;ASSESS=5;INTERNAL=null,null;SVTYPE=Bov-A2;SVLEN=267;MEINFO=Bov-A2,1,268,-;DIFF=1:c54t,t67a,g88a,a91g,a94g,g98a,a118c,c119t,c175a,g209a,c214t,g254a,c255t,c266t;LP=141;RP=138;RA=0.031;PRIOR=false;SR=93	0/1:-230.7,-17.46,-83.7	0/1:-110.7,-12.04,-104	0/0:-0,-15.65,-312	0/1:-183,-13.85,-60	0/0:-0,-9.03,-176.7	0/0:-0,-12.04,-240	0/1:-169.2,-16.26,-132	0/1:-134.7,-13.85,-120	1/1:-300.8,-18.06,-0.6	0/1:-107.2,-11.44,-94	1/1:-270.5,-15.65,-0	0/0:-0,-3.61,-72	0/1:-205,-19.27,-144	0/0:-0,-12.64,-252	0/0:-0,-9.03,-180	0/0:-0,-4.21,-84	0/1:-112,-10.24,-84	0/0:-0.6,-13.85,-264.6	0/0:-0,-13.25,-264	0/0:-0,-6.62,-132	0/1:-122.5,-12.64,-107	0/0:-0,-9.63,-192	0/1:-219.4,-18.06,-108	0/1:-169,-12.64,-39.9	1/1:-184,-12.04,-1.2	0/1:-211.4,-18.06,-104	0/0:-0,-14.45,-288	0/0:-0,-12.04,-240	0/0:-0,-12.04,-240	0/0:-0.03,-14.45,-281.2	0/1:-79.6,-12.64,-152	0/1:-225.4,-21.67,-168	0/0:-0,-13.25,-264	0/1:-122,-10.84,-72	0/0:-0,-9.03,-180	0/0:-0,-7.83,-156	0/1:-128,-11.44,-84	0/0:-0,-6.02,-120
chr6	27384868	A	<INS:ME:Bov-A2>	PASS	TSD=null;ASSESS=4;INTERNAL=null,null;SVTYPE=Bov-A2;SVLEN=264;MEINFO=Bov-A2,5,269,+;DIFF=0.41:n1-2,a11c,g55a,g56t,a68g,n81-94,t138c,g198c,g199a,g219a,c230t,n238-269;LP=5;RP=1;RA=2.322;PRIOR=false;SR=4	0/0:-0,-15.65,-312	0/0:-0,-9.03,-180	0/0:-0,-15.05,-300	0/0:-0,-6.62,-132	0/0:-0,-10.84,-216	0/0:-0.6,-13.85,-264.6	0/0:-0,-12.04,-240	0/0:-0,-15.05,-300	0/0:-0,-13.25,-264	0/0:-0,-9.63,-192	0/0:-0,-13.25,-261.7	0/0:-0,-11.44,-228	0/0:-0,-10.24,-204	0/0:-0,-14.45,-288	0/0:-0,-12.04,-240	0/0:-0,-5.42,-108	0/0:-0,-8.43,-168	0/0:-0,-9.03,-180	0/0:-0,-13.85,-276	0/0:-0,-7.22,-144	0/0:-0,-12.64,-252	1/1:-46.6,-3.01,-0.6	0/0:-0,-3.61,-72	0/0:-0,-8.43,-168	0/1:-54,-9.63,-128	0/0:-0,-11.44,-228	0/0:-0,-13.25,-264	0/0:-0,-13.25,-264	0/0:-0,-15.05,-300	0/0:-0,-15.05,-300	0/0:-0,-10.84,-216	0/0:-0,-15.65,-312	0/0:-0,-17.46,-346.2	0/0:-0,-13.85,-276	0/0:-0,-9.03,-180	0/0:-0,-10.24,-204	0/0:-0,-13.25,-264	0/0:-0,-8.43,-168
chr6	32515506	C	<INS:ME:Bov-A2>	PASS	TSD=ATATATTAGGCC;ASSESS=5;INTERNAL=null,null;SVTYPE=Bov-A2;SVLEN=267;MEINFO=Bov-A2,1,268,-;DIFF=0.99:c32t,g39a,g84a,g110a,g144a,n198,g202a,a203g,c206t,t207g,g211t,g219a,t259g,t260c;LP=7;RP=5;RA=0.485;PRIOR=false;SR=7	0/0:-0,-15.65,-309.5	0/0:-0,-7.83,-146.6	0/0:-0,-10.24,-203.3	0/0:-0,-6.02,-118	0/0:-0,-13.25,-261.1	0/0:-0,-9.63,-192	0/0:-0,-12.04,-240	0/0:-0,-13.25,-264	0/0:-0.03,-13.25,-259.2	0/0:-0,-5.42,-108	0/0:-0,-13.85,-273.5	0/0:-0,-5.42,-108	0/0:-0,-13.25,-260.6	0/0:-0.1,-12.04,-234.7	0/0:-0,-6.62,-132	0/0:-0,-3.01,-60	0/1:-21.1,-6.02,-89	0/0:-0,-8.43,-168	0/0:-0,-15.05,-296.4	0/1:-34,-9.63,-148	0/0:-0,-11.44,-228	0/0:-0,-4.82,-96	0/0:-0,-9.63,-192	0/0:-0,-9.03,-172.9	0/0:-0,-9.03,-178.8	0/0:-0,-5.42,-106	0/0:-0,-14.45,-288	0/0:-0,-12.64,-252	0/0:-0,-12.64,-252	0/0:-0,-10.84,-216	0/0:-0,-6.02,-119.3	0/0:-0,-11.44,-228	0/0:-0,-15.05,-296.2	0/0:-0,-12.04,-239.4	0/0:-0,-9.63,-192	0/1:-32,-6.62,-94	0/0:-0,-9.03,-180	0/0:-0,-5.42,-108
chr6	32522465	C	<INS:ME:Bov-A2>	PASS	TSD=CCATTTCCTTCTC;ASSESS=5;INTERNAL=null,null;SVTYPE=Bov-A2;SVLEN=265;MEINFO=Bov-A2,3,268,+;DIFF=0.98:n1-2,a10g,c20t,c48a,g55a,c87a,a92g,c103g,c111g,a118g,c163g,g170a,g172a,g195t,g198a,g202a,g219a,g241a,g247a;LP=227;RP=103;RA=1.14;PRIOR=false;SR=26	0/1:-209.6,-18.06,-96	0/1:-127.5,-12.04,-73.9	0/1:-130,-15.65,-156	0/1:-52,-13.85,-210	0/1:-38.6,-9.63,-142.13	0/1:-40,-10.84,-162.4	0/1:-110.06,-10.84,-71.9	0/1:-135.21,-13.25,-73.9	0/1:-215.8,-18.66,-97.91	0/1:-20,-6.02,-90	0/1:-189.5,-15.05,-64	0/1:-37,-5.42,-54	0/0:-0.61,-10.24,-176.5	0/1:-130.01,-9.63,-27.8	0/1:-88.5,-12.04,-104.33	0/1:-40,-6.02,-62	0/1:-128.6,-10.24,-39.93	0/1:-109.6,-10.24,-63.2	0/1:-40,-9.03,-130	0/1:-70,-6.62,-46.4	0/1:-50,-12.64,-180	0/1:-37.3,-5.42,-40.02	0/0:-0,-9.03,-180	0/1:-84.5,-7.22,-34.06	0/0:-1.2,-8.43,-141.2	0/1:-114,-13.25,-105.3	0/1:-122.8,-13.25,-94.88	0/1:-50,-9.63,-124.6	0/1:-94.39,-10.24,-68.1	0/0:-0,-9.03,-180	0/1:-147.4,-12.64,-63.2	0/1:-50,-10.84,-154	0/0:-0,-7.83,-156	0/1:-79.6,-8.43,-66	0/0:-0,-15.65,-312	0/1:-40,-3.61,-24	0/1:-90,-7.22,-33.9	0/0:-0,-6.62,-132
chr6	54127639	C	<INS:ME:Bov-A2>	PASS	TSD=null;ASSESS=3;INTERNAL=null,null;SVTYPE=Bov-A2;SVLEN=265;MEINFO=Bov-A2,3,268,+;DIFF=0.09:n1-2,c36t,c47t,g58a,t90a,a91c,n125-222;LP=1;RP=5;RA=-2.322;PRIOR=false;SR=6	0/0:-0,-14.45,-285.3	0/0:-0.6,-2.41,-36.4	0/0:-0,-15.65,-305.8	0/0:-0.6,-4.82,-81	0/0:-1.2,-10.84,-188.6	0/0:-0,-6.62,-132	0/0:-0.6,-10.84,-202.2	0/0:-1.2,-7.83,-129.2	0/0:-0,-12.04,-238	0/0:-0,-6.62,-130	0/0:-0,-13.85,-262.7	0/0:-1.2,-7.22,-119.2	0/0:-0,-11.44,-221.1	0/0:-0,-9.63,-189.5	0/0:-0,-8.43,-166	0/0:-0.6,-5.42,-94.6	0/0:-0.6,-7.83,-144.6	0/0:-0,-5.42,-108	0/0:-1.2,-13.25,-237.8	0/0:-0,-7.22,-142	0/0:-0.6,-11.44,-214.6	0/0:-0,-4.21,-84	0/0:-0,-3.01,-60	0/0:-0,-1.81,-36	0/0:-0,-9.63,-192	0/0:-0.6,-12.64,-240.6	0/0:-0,-8.43,-168	0/0:-0,-8.43,-167.6	0/0:-0.6,-14.45,-267.2	0/0:-0,-13.85,-267.3	0/1:-36.77,-4.21,-28.53	0/0:-0,-14.45,-281.2	0/0:-0.6,-9.03,-168.6	0/0:-0.6,-6.02,-106	0/0:-0,-10.24,-204	0/0:-0,-6.02,-120	0/0:-0,-5.42,-108	0/0:-0,-6.02,-120
chr6	56160284	A	<INS:ME:Bov-A2>	PASS	TSD=AGTTAGTACTTTCA;ASSESS=5;INTERNAL=null,null;SVTYPE=Bov-A2;SVLEN=266;MEINFO=Bov-A2,2,268,-;DIFF=0.98:n1,c9t,a10g,c30t,g55a,g61a,d70-72,n74,c78t,a91g,g93t,g99a,g104t,d115-120,c197t,g211a,g219a,c255t,c266t,n269;LP=9;RP=19;RA=-1.078;PRIOR=false;SR=15	0/0:-0,-9.03,-179.8	1/1:-198.6,-12.04,-0.6	0/0:-0,-8.43,-168	0/0:-0,-5.42,-108	0/0:-0,-9.03,-180	0/0:-0,-12.64,-252	0/0:-0,-9.03,-180	0/0:-0,-10.84,-216	0/0:-0,-13.25,-264	0/0:-0,-8.43,-168	0/0:-0,-12.64,-252	0/1:-56,-10.84,-156	0/0:-0,-15.05,-300	0/0:-0,-10.24,-204	0/0:-0,-10.84,-215.9	0/0:-0,-4.82,-96	0/0:-0,-13.25,-264	0/0:-0,-8.43,-168	0/0:-0,-13.85,-276	0/0:-0,-7.22,-144	0/0:-0,-20.47,-406.2	0/0:-0,-3.61,-72	0/0:-0,-5.42,-108	0/0:-0,-7.83,-156	0/0:-0,-13.25,-264	0/0:-0,-14.45,-288	0/0:-0,-9.63,-192	0/0:-0,-10.84,-216	0/0:-0,-15.65,-312	0/0:-0,-13.85,-276	0/1:-94,-9.03,-70	0/0:-0,-13.85,-276	0/0:-0,-11.44,-228	0/0:-0,-12.04,-240	0/0:-0,-8.43,-168	0/0:-0,-7.83,-156	0/0:-0,-8.43,-168	0/0:-0,-7.83,-156
chr6	60845623	A	<INS:ME:Bov-A2>	PASS	TSD=null;ASSESS=4;INTERNAL=null,null;SVTYPE=Bov-A2;SVLEN=267;MEINFO=Bov-A2,1,268,+;DIFF=0.42:a11g,c17a,n47-141,c168t,g202a,g208a,c218t,n224,g231a,c255t,n265-269;LP=4;RP=20;RA=-2.322;PRIOR=false;SR=5	0/0:-0,-15.05,-298	0/0:-0,-6.62,-129.9	0/0:-0,-16.26,-324	0/0:-0,-3.01,-60	0/0:-0.6,-12.64,-240.6	0/0:-0,-17.46,-348	0/0:-0,-11.44,-227	0/0:-0,-14.45,-288	0/0:-0,-9.63,-191.6	0/0:-0,-7.83,-154	0/0:-0,-15.65,-308	0/0:-0,-11.44,-222.7	0/0:-0.05,-15.65,-303.4	0/0:-0,-14.45,-288	0/0:-0,-9.63,-189	0/0:-0,-6.62,-131	0/0:-0.13,-9.03,-170.5	0/0:-0,-5.42,-108	0/0:-0,-15.05,-298	0/0:-0,-10.84,-216	0/0:-0,-11.44,-228	0/0:-0,-1.2,-24	0/0:-0,-4.82,-96	0/0:-0,-7.83,-152	0/0:-0,-6.62,-129.5	0/1:-30,-10.24,-148.1	0/0:-0,-10.84,-216	0/0:-0,-13.85,-276	0/0:-0,-10.24,-202	0/0:-0,-12.64,-251.4	0/0:-1.2,-11.44,-202.1	0/0:-0,-11.44,-228	0/0:-0,-13.25,-262	0/0:-0,-9.63,-191.4	0/0:-0,-9.03,-180	0/0:-0,-6.02,-114.6	0/0:-0,-9.03,-169.4	0/0:-0,-6.62,-132
chr6	63419592	T	<INS:ME:Bov-A2>	PASS	TSD=null;ASSESS=3;INTERNAL=null,null;SVTYPE=Bov-A2;SVLEN=267;MEINFO=Bov-A2,1,268,+;DIFF=1:g27a,c54t,g56a,t77a,t90g,g98a,c111t,a152c,c197a,g209t,c230t,g247a;LP=23;RP=41;RA=-0.834;PRIOR=false;SR=12	0/0:-0,-15.65,-312	0/0:-0,-12.04,-240	0/0:-0,-15.65,-308	0/0:-0,-5.42,-108	0/0:-0,-9.63,-192	0/0:-0,-9.03,-180	0/0:-0,-14.45,-288	0/0:-0.03,-13.25,-259.2	0/1:-121.51,-21.67,-275.1	0/0:-0,-8.43,-168	0/0:-0,-9.63,-192	0/0:-0,-10.24,-202	0/0:-0,-13.85,-274	0/0:-0,-18.06,-358	0/1:-94,-14.45,-166	0/0:-0,-3.61,-72	0/0:-0,-6.02,-120	0/0:-0,-3.01,-60	0/0:-0,-12.04,-240	0/0:-0,-8.43,-166	0/0:-0,-11.44,-224	0/0:-0,-6.62,-132	0/0:-0,-5.42,-108	0/0:-0,-9.03,-178	0/0:-0,-6.62,-132	0/0:-0,-11.44,-228	0/0:-0,-10.84,-216	0/0:-0,-10.24,-204	0/0:-0,-13.85,-269	0/0:-0,-9.03,-180	0/0:-0,-10.84,-215.7	0/0:-0.6,-16.86,-322.6	0/1:-108,-9.03,-60	0/0:-0,-9.63,-192	0/0:-0,-6.62,-132	0/0:-0,-7.22,-144	0/0:-0,-5.42,-108	0/0:-0,-9.63,-192
chr6	66410089	T	<INS:ME:Bov-A2>	PASS	TSD=null;ASSESS=4;INTERNAL=XM_005207933.4,INTRONIC;SVTYPE=Bov-A2;SVLEN=269;MEINFO=Bov-A2,0,269,+;DIFF=1:c54t,g58a,c63t,t64g,t67a,g73a,c74g,g85a,a91g,a94g,c111t,c123g,c218t,t220c,g231a,c255t,n269;LP=15;RP=18;RA=-0.263;PRIOR=false;SR=11	0/0:-0,-14.45,-288	0/0:-0,-9.63,-188.9	0/0:-0,-14.45,-288	0/1:-174.8,-13.85,-72	0/0:-0,-10.84,-216	0/0:-0,-11.44,-226	0/0:-0,-9.03,-180	0/0:-0,-13.25,-264	0/0:-0,-14.45,-286	0/0:-0,-14.45,-285	0/0:-0.6,-12.04,-228.6	0/0:-0,-6.02,-120	0/0:-0,-18.66,-372	0/0:-0,-12.64,-252	0/0:-0,-10.84,-216	0/0:-0,-6.62,-130	1/1:-197.5,-12.04,-0.6	0/0:-0,-10.84,-214	0/0:-0.01,-15.05,-292.7	0/0:-0,-6.02,-120	0/0:-0,-10.84,-216	0/0:-0,-8.43,-166	0/0:-0,-7.83,-156	0/0:-0,-4.82,-92.4	0/0:-0,-6.62,-132	0/0:-0.6,-6.02,-108.6	0/0:-0,-16.26,-324	0/0:-0,-7.83,-154	0/0:-0.03,-9.03,-167.1	0/0:-0,-17.46,-348	0/0:-0,-4.82,-96	0/0:-0,-20.47,-403.2	0/0:-0,-12.64,-252	0/0:-0,-14.45,-286	0/0:-0,-8.43,-168	0/0:-0,-7.22,-144	0/0:-0,-8.43,-168	0/0:-0,-12.04,-240
chr6	82378412	C	<INS:ME:Bov-A2>	PASS	TSD=null;ASSESS=3;INTERNAL=null,null;SVTYPE=Bov-A2;SVLEN=262;MEINFO=Bov-A2,6,268,+;DIFF=0.94:n1-5,c17a,a42g,a53g,g55a,c71a,t72a,a80g,g112a,g219a,g231a,c246t,c255t;LP=7;RP=9;RA=-0.363;PRIOR=false;SR=13	0/0:-0,-13.25,-260.7	0/0:-0,-9.03,-178	0/0:-0,-14.45,-282	0/0:-0,-4.21,-82.6	0/0:-0.6,-9.03,-166.3	0/0:-0,-6.02,-115.6	0/0:-0,-13.25,-264	0/0:-0.6,-6.62,-120.1	0/0:-0,-12.04,-236	0/0:-0,-9.03,-180	0/0:-0,-9.63,-186.9	0/0:-0,-5.42,-108	0/0:-1.2,-10.84,-181.1	0/0:-0,-16.86,-334	0/1:-24,-2.41,-24	0/0:-0,-8.43,-168	0/0:-0.6,-3.61,-60.6	0/0:-0,-1.81,-34	0/0:-0,-19.87,-392.1	0/0:-0,-8.43,-167.9	0/0:-0,-6.62,-124.6	0/0:-0,-4.21,-84	0/0:-0,-6.62,-132	0/0:-1.2,-1.2,-1.2	0/0:-0,-3.61,-72	0/0:-0,-13.25,-260.2	0/0:-0.22,-6.62,-122.8	0/0:-0,-7.83,-152	0/0:-0.6,-12.04,-218.2	0/0:-0.6,-9.63,-174.3	0/0:-0.6,-7.22,-132.6	0/0:-1.2,-8.43,-142.3	0/0:-0,-12.04,-237.3	0/0:-0.63,-11.44,-209.4	0/0:-0,-8.43,-167.7	0/0:-0.6,-2.41,-36.6	0/0:-0,-4.82,-96	0/0:-0.6,-7.83,-144.6
chr6	83915635	C	<INS:ME:Bov-A2>	PASS	TSD=AAGAGCTCGTATGCCAAGCTGTGC;ASSESS=5;INTERNAL=XM_010806181.3,TERMINATOR;SVTYPE=Bov-A2;SVLEN=267;MEINFO=Bov-A2,1,268,+;DIFF=0.96:n32,n44,t45c,c47t,c48t,c54t,i90a,n94-94,a109g,c132t,t133g,g194a,c197t,g225a,g231a,g241a,c246t,c255t,n268-269;LP=8;RP=14;RA=-0.807;PRIOR=false;SR=11	0/0:-0,-13.85,-276	0/0:-0,-4.82,-96	0/0:-0,-10.84,-216	0/0:-0,-8.43,-168	0/0:-0,-15.05,-300	0/0:-0,-8.43,-168	0/0:-0,-13.85,-276	0/0:-0,-13.85,-276	0/0:-0,-12.64,-252	0/0:-0,-9.63,-192	0/0:-0,-11.44,-228	0/0:-0,-4.82,-96	0/0:-0,-15.05,-300	0/0:-0,-10.24,-204	0/0:-0,-7.83,-156	0/0:-0,-5.42,-108	0/0:-0,-9.63,-192	0/0:-0,-6.62,-132	0/0:-0,-14.45,-288	0/0:-0,-13.25,-264	0/0:-0.01,-12.04,-235.8	0/0:-0,-4.82,-96	0/0:-0,-6.02,-120	0/0:-0,-9.03,-180	0/0:-0,-10.24,-204	0/0:-0,-10.24,-204	0/0:-0,-9.63,-192	0/0:-0,-9.63,-192	0/1:-148,-12.04,-72	0/0:-0,-10.84,-216	0/0:-0,-5.42,-108	0/0:-0,-14.45,-288	0/0:-0,-13.85,-276	0/0:-0,-6.62,-132	0/0:-0,-10.24,-204	0/0:-0,-10.24,-204	0/1:-126,-9.63,-48	0/0:-0,-3.61,-72
chr6	85290932	A	<INS:ME:Bov-A2>	PASS	TSD=null;ASSESS=3;INTERNAL=XM_002688336.3,PROMOTER;SVTYPE=Bov-A2;SVLEN=250;MEINFO=Bov-A2,19,269,-;DIFF=0.88:n1-4,c32g,t38c,g39a,g52c,c54t,c89a,g98a,g112a,t129c,g194a,c197t,g211a,g219a,c246t,c255t;LP=4;RP=10;RA=-1.322;PRIOR=false;SR=8	0/0:-0,-10.84,-213	0/1:-32.06,-7.83,-101.6	0/0:-0,-11.44,-226	0/1:-46,-7.22,-88	0/0:-0,-11.44,-225.9	0/0:-0,-12.04,-239.4	0/0:-0,-7.22,-144	0/0:-0,-9.63,-187.6	0/0:-0,-10.24,-204	0/0:-0,-8.43,-168	0/0:-0,-12.64,-246.1	0/1:-23.1,-4.82,-50.17	0/0:-0,-12.04,-238.2	0/0:-0,-10.24,-204	0/0:-0,-7.83,-156	0/0:-0,-5.42,-108	0/1:-22,-3.61,-40	0/0:-0,-9.03,-180	0/0:-0,-9.63,-191.4	0/0:-0,-3.61,-72	0/0:-0,-8.43,-166	0/0:-0,-5.42,-108	0/0:-0,-4.82,-96	0/1:-41.5,-7.22,-76	0/0:-0,-7.83,-156	0/0:-1.2,-10.84,-177.2	0/0:-0,-9.03,-180	0/0:-0,-14.45,-286	0/1:-92.4,-10.24,-80	0/0:-0,-15.05,-298.3	0/0:-1.2,-12.04,-209.2	0/0:-0,-10.84,-215.7	0/0:-0,-13.85,-273.7	0/0:-0.6,-6.02,-106.6	0/0:-0,-9.03,-180	0/0:-1.2,-9.03,-147.2	0/0:-0,-9.63,-192	0/0:-0,-6.02,-118.8
chr6	85887369	T	<INS:ME:Bov-A2>	PASS	TSD=GAAAATTGTAT;ASSESS=5;INTERNAL=null,null;SVTYPE=Bov-A2;SVLEN=267;MEINFO=Bov-A2,1,268,-;DIFF=0.61:g14t,c30t,g55a,c74t,g83t,a92g,c103t,c111t,t120a,t126a,n129,t133a,t138g,c179a,c197t,g199a,g231a,g238a,c240t,c246t,g247a,g254a,c255t;LP=3;RP=4;RA=-0.415;PRIOR=false;SR=14	0/0:-0,-15.65,-311	0/0:-0,-10.24,-202	0/0:-0.13,-10.84,-198.4	0/0:-0,-3.01,-60	0/0:-0,-13.25,-264	0/0:-0,-11.44,-226.2	0/0:-0,-12.64,-249	0/1:-36,-12.04,-187.8	0/0:-0.01,-10.24,-195.8	0/0:-0.71,-8.43,-131.2	0/0:-0,-10.24,-204	0/0:-0,-7.83,-156	0/0:-0.45,-4.21,-67	0/0:-1.29,-10.24,-184	0/1:-36.01,-3.01,-17.3	0/0:-0,-7.83,-154	0/0:-0,-10.24,-204	0/0:-0,-8.43,-168	0/1:-86.8,-11.44,-113.3	0/0:-0,-12.64,-252	0/0:-0.13,-11.44,-212.2	0/0:-0,-4.82,-93.8	0/0:-0,-3.01,-60	0/0:-0,-10.84,-211.1	0/0:-0.01,-6.62,-119.7	0/0:-0,-9.63,-192	0/1:-69.4,-8.43,-89.4	0/0:-0,-16.26,-324	0/0:-0.6,-12.64,-236.8	0/0:-1.81,-16.26,-286.21	0/0:-0,-12.64,-250.9	0/0:-0,-16.86,-334	0/0:-1.24,-9.03,-142.3	0/0:-1.21,-13.85,-240	0/0:-0.6,-6.02,-108.6	0/0:-0.6,-6.62,-117.8	0/0:-0,-8.43,-168	0/0:-0,-7.22,-142.9
chr6	92901282	T	<INS:ME:Bov-A2>	PASS	TSD=null;ASSESS=3;INTERNAL=null,null;SVTYPE=Bov-A2;SVLEN=267;MEINFO=Bov-A2,1,268,+;DIFF=0.06:g14a,c17t,n89-143,a148g,g156a,g172a,g193a,c197t,g198a,g200a,g209t,t210c,c218t,t222c,g225a,g242a;LP=2;RP=1;RA=1;PRIOR=false;SR=4	0/0:-0,-15.05,-296.7	0/0:-0,-4.82,-96	0/0:-0,-13.25,-260	0/0:-0,-6.02,-120	0/0:-0.13,-12.64,-242.6	0/0:-0,-15.05,-299.5	0/0:-1.2,-12.04,-217.2	0/0:-0,-10.84,-216	0/0:-0,-9.63,-192	0/0:-0,-6.02,-120	0/0:-0.6,-13.25,-250.6	0/1:-48,-9.03,-132	0/1:-84,-13.25,-180	0/0:-0,-13.25,-264	0/0:-0,-9.03,-180	0/0:-0,-7.22,-144	0/0:-0.6,-9.63,-180.6	0/1:-60,-10.24,-143.4	0/1:-58.01,-15.65,-243.2	0/0:-0,-6.02,-120	0/0:-0,-13.85,-273.5	0/0:-0,-2.41,-48	0/0:-0.6,-7.22,-132.6	0/0:-0,-5.42,-107.9	0/0:-0,-6.62,-132	0/0:-0,-10.84,-216	0/0:-0.01,-9.63,-185.8	0/1:-48,-11.44,-180	0/0:-0,-12.04,-240	0/0:-0,-9.03,-178	0/0:-0,-9.63,-192	0/0:-0.6,-12.64,-240.6	0/0:-1.2,-13.25,-234.7	0/0:-0,-13.25,-264	0/0:-0,-9.03,-180	0/0:-0,-9.63,-192	0/1:-36,-10.24,-168	0/0:-1.2,-7.83,-133.2
chr6	93927220	T	<INS:ME:Bov-A2>	PASS	TSD=TCTAAGAAGCT;ASSESS=5;INTERNAL=null,null;SVTYPE=Bov-A2;SVLEN=267;MEINFO=Bov-A2,1,268,+;DIFF=0.92:c32t,g39a,g55a,a80g,g85a,n91,g98c,g99a,g112a,c119t,g151a,a152c,g198a,g202a,g211t,c249a,c255t,n259-269;LP=138;RP=143;RA=-0.051;PRIOR=false;SR=67	0/1:-174.63,-17.46,-136.7	0/1:-191.85,-16.86,-85	0/1:-175.3,-15.65,-102.8	0/1:-127.4,-11.44,-68.4	0/1:-122.7,-12.04,-92.1	0/0:-0,-13.25,-264	0/0:-0,-10.84,-212	0/0:-0,-12.04,-240	0/0:-0,-15.05,-300	0/0:-0.01,-6.02,-115.6	0/1:-73.4,-11.44,-140.7	0/1:-48.8,-10.24,-144	0/0:-0,-12.04,-240	0/0:-0,-11.44,-225.4	0/1:-67.5,-9.63,-108	0/0:-0.43,-12.64,-240.2	1/1:-347.2,-19.87,-0	0/0:-0,-7.22,-142	0/0:-0,-16.86,-334	1/1:-202.7,-12.04,-0.6	0/0:-0,-10.24,-201.4	0/1:-85.3,-9.03,-72	0/1:-168.33,-16.86,-127.2	1/1:-133.2,-9.03,-0.6	0/0:-0,-9.03,-180	0/1:-155.6,-14.45,-96	0/0:-0,-16.26,-322	0/1:-66.6,-12.64,-164.01	0/1:-137.7,-16.86,-178	0/1:-164.54,-15.65,-113.1	1/1:-227.8,-15.65,-1.28	0/1:-91.4,-13.85,-157.6	0/1:-114.4,-13.25,-131.6	0/1:-53.4,-7.22,-84	0/0:-0,-9.03,-180	0/0:-0,-9.03,-180	1/1:-211.31,-13.85,-1.81	1/1:-133.2,-9.03,-1.2
chr6	95358188	A	<INS:ME:Bov-A2>	PASS	TSD=null;ASSESS=4;INTERNAL=NM_001076389.2,INTRONIC;SVTYPE=Bov-A2;SVLEN=266;MEINFO=Bov-A2,2,268,-;DIFF=0.56:n1-90,c103t,c125g,g199a,g219a,g247a,a257c;LP=5;RP=1;RA=2.322;PRIOR=false;SR=8	0/0:-0,-17.46,-346	0/0:-0,-7.83,-156	0/0:-0,-11.44,-224.4	0/0:-0,-10.24,-204	0/0:-0,-16.86,-336	0/0:-0,-12.64,-250.9	0/0:-0,-13.85,-276	0/0:-0,-10.84,-216	0/0:-0,-11.44,-227.5	0/0:-0,-6.62,-132	0/0:-0,-12.04,-238.2	0/1:-24,-3.01,-34	0/0:-0,-18.06,-360	0/0:-0,-13.85,-276	0/0:-0,-9.63,-192	0/0:-0,-7.22,-144	0/0:-1.2,-12.04,-216.7	0/0:-0,-5.42,-108	0/0:-0,-11.44,-228	0/0:-0,-9.03,-180	0/0:-0,-8.43,-167.5	0/0:-0,-8.43,-168	0/0:-0,-5.42,-108	0/0:-0.6,-7.83,-140.8	0/0:-0,-8.43,-168	0/0:-0,-6.02,-120	0/0:-0,-10.24,-204	0/0:-0.6,-12.04,-226.6	0/1:-67.2,-12.64,-180.03	0/0:-0,-10.24,-204	0/0:-0,-7.22,-144	0/0:-0,-15.05,-300	0/0:-0,-12.04,-240	0/0:-0,-9.03,-180	0/0:-0,-8.43,-168	0/0:-0,-9.63,-188.6	0/0:-0.6,-9.03,-168.6	0/0:-0,-12.04,-240
chr6	97105836	A	<INS:ME:Bov-A2>	PASS	TSD=TAAAGCCTACACACCAA;ASSESS=5;INTERNAL=XM_024993610.1,INTRONIC;SVTYPE=Bov-A2;SVLEN=267;MEINFO=Bov-A2,1,268,-;DIFF=0:c17a,c46t,c47t,c54t,n69-72,n91-92,g98a,g110a,a118t,n150,t173c,n195,c205g,n207,n210,n226-269;LP=2;RP=3;RA=-0.585;PRIOR=false;SR=17	0/1:-72,-13.25,-192	0/1:-96,-10.24,-108	0/0:-0,-16.86,-336	0/0:-0.6,-6.62,-120.6	0/0:-0,-10.24,-204	0/1:-168,-13.85,-108	0/0:-0.13,-12.04,-234.6	0/0:-0,-9.63,-192	0/0:-0,-16.26,-324	0/0:-0,-10.84,-216	0/0:-0,-13.85,-273.7	0/0:-0,-11.44,-228	0/1:-96,-12.04,-144	0/0:-1.2,-13.25,-240.8	0/1:-36,-10.24,-168	0/1:-108,-6.62,-24	0/1:-144,-11.44,-84	0/0:-0,-7.22,-144	0/0:-0,-11.44,-228	0/0:-0,-7.83,-156	0/0:-0,-12.64,-252	0/1:-48,-4.21,-36	0/1:-72,-10.84,-144	0/0:-0,-8.43,-167.5	0/1:-24,-6.62,-106	0/1:-96,-7.83,-60	0/0:-0,-13.85,-276	0/0:-1.2,-13.25,-240.7	0/1:-72,-13.25,-192	0/1:-36,-8.43,-132	0/1:-72,-7.83,-84	0/1:-36,-13.25,-228	0/1:-36,-8.43,-132	0/0:-0.6,-8.43,-156.6	0/1:-72,-4.82,-24	0/1:-46,-7.22,-96	0/0:-0,-9.03,-180	0/1:-72,-6.02,-48
chr6	97566311	T	<INS:ME:Bov-A2>	PASS	TSD=null;ASSESS=4;INTERNAL=NM_001076945.1,INTRONIC;SVTYPE=Bov-A2;SVLEN=267;MEINFO=Bov-A2,1,268,-;DIFF=0:c19g,a60g,a68g,a92g,c103t,g108c,g110a,g112t,n117-269;LP=1;RP=3;RA=-1.585;PRIOR=false;SR=10	0/0:-0,-11.44,-228	0/0:-0.6,-10.24,-192.6	0/0:-0.6,-15.05,-284.1	0/0:-1.2,-9.03,-157.2	0/0:-0,-10.84,-216	0/0:-1.2,-13.25,-240.3	0/0:-0.6,-12.04,-228.6	0/0:-0.6,-11.44,-216.6	0/0:-0.6,-14.45,-273	0/1:-72,-11.44,-156	0/0:-1.2,-16.26,-301.2	0/0:-1.2,-10.24,-181.2	0/0:-0.6,-8.43,-156.6	0/0:-1.2,-19.27,-361.2	0/0:-0,-12.64,-252	0/1:-36,-6.02,-84	0/0:-0,-10.24,-204	0/0:-1.2,-8.43,-145.2	0/0:-1.2,-18.66,-349.2	0/0:-0,-12.64,-252	0/0:-0.6,-16.26,-312.6	0/0:-0,-4.21,-84	0/0:-1.2,-9.03,-157.2	0/0:-1.2,-10.84,-193.2	0/1:-36,-10.84,-180	0/0:-0,-7.22,-144	0/1:-36,-7.83,-120	0/0:-1.81,-19.87,-361.71	0/0:-0,-10.84,-216	0/0:-1.2,-12.04,-216.7	0/1:-48,-10.84,-166	0/0:-0,-13.25,-264	0/0:-0,-11.44,-228	0/0:-0,-15.65,-312	0/0:-0,-4.82,-96	0/0:-0.6,-7.22,-132.6	0/0:-0,-9.03,-180	0/0:-0,-9.03,-180
chr6	108485353	A	<INS:ME:Bov-A2>	PASS	TSD=null;ASSESS=4;INTERNAL=null,null;SVTYPE=Bov-A2;SVLEN=267;MEINFO=Bov-A2,1,268,-;DIFF=0.99:c36t,t38c,t45g,g55a,a68g,a92g,t128c,a187g,c197t,c218t,a223c,c255t,a261g,n268-269;LP=70;RP=9;RA=2.959;PRIOR=false;SR=16	0/1:-66,-16.86,-260	0/0:-0,-9.63,-188.2	0/0:-0,-15.05,-300	0/1:-34,-7.22,-108	0/0:-0,-6.02,-120	0/0:-0.08,-13.25,-256.8	0/1:-56.01,-12.04,-172.2	0/0:-0,-13.85,-275.2	0/0:-0,-13.25,-262.4	0/0:-0,-10.24,-197.7	0/0:-0,-16.86,-335.9	0/0:-0.6,-7.22,-132.6	0/0:-0.6,-14.45,-254.7	0/0:-0,-12.04,-240	0/0:-0,-7.22,-143.5	0/0:-0,-9.63,-190.7	0/1:-24,-2.41,-22	0/1:-75.7,-8.43,-72	0/1:-55.63,-11.44,-157.2	0/0:-0,-5.42,-108	0/0:-0,-8.43,-168	0/0:-0,-7.83,-154.9	0/0:-0,-6.02,-120	0/1:-24,-6.62,-74.61	0/0:-0,-12.64,-249.8	0/1:-116,-10.84,-70.78	0/0:-0,-4.21,-84	0/0:-0,-8.43,-168	0/0:-0,-13.85,-276	0/0:-0,-12.64,-252	0/0:-0,-10.24,-201.7	0/0:-0,-17.46,-347.3	0/0:-0,-12.04,-239	0/0:-0.44,-14.45,-272.8	0/0:-0,-7.83,-156	0/0:-0,-5.42,-108	0/0:-1.2,-10.84,-189.2	0/0:-0,-6.02,-120
chr6	108917903	T	<INS:ME:Bov-A2>	PASS	TSD=null;ASSESS=3;INTERNAL=null,null;SVTYPE=Bov-A2;SVLEN=267;MEINFO=Bov-A2,1,268,+;DIFF=0.25:c37t,c54t,g98a,n111-269;LP=1;RP=3;RA=-1.585;PRIOR=false;SR=6	0/0:-0,-12.64,-252	0/1:-48,-13.25,-216	0/0:-0.6,-8.43,-156	0/0:-0.6,-9.63,-180.6	0/0:-0,-7.22,-144	0/1:-48,-10.24,-156	0/0:-0,-12.64,-252	0/0:-1.81,-13.85,-241.81	0/0:-0.6,-9.63,-180.6	0/0:-0,-6.62,-130.5	0/0:-0,-6.02,-120	0/0:-0.6,-9.03,-168.6	0/0:-0.6,-13.25,-252.6	0/0:-1.2,-14.45,-265.2	0/0:-0.6,-9.03,-166.7	0/0:-0,-3.01,-58	0/0:-0.6,-9.03,-168.6	0/0:-0,-12.04,-240	0/0:-0,-12.04,-240	0/0:-0.6,-6.62,-120.6	0/0:-0,-10.24,-202	0/0:-1.2,-7.22,-121.2	0/0:-0.6,-9.63,-179.3	0/0:-0,-6.02,-120	0/0:-0.6,-8.43,-156.6	0/0:-1.2,-16.26,-299.2	0/0:-0,-7.22,-144	0/0:-0,-11.44,-228	0/0:-0,-9.63,-191.6	0/0:-0,-9.63,-192	0/0:-0.6,-12.64,-240.6	0/0:-1.2,-13.25,-239.2	0/0:-0.6,-10.24,-192.1	0/0:-0.6,-9.63,-180.6	0/0:-0.6,-13.85,-264.6	0/0:-0,-9.03,-178	0/0:-0.6,-9.63,-180.6	0/0:-0.6,-10.84,-204.6
chr7	2400499	T	<INS:ME:Bov-A2>	PASS	TSD=GGAAACATTGTTTTT;ASSESS=5;INTERNAL=XR_003035737.1,PROMOTER;SVTYPE=Bov-A2;SVLEN=258;MEINFO=Bov-A2,10,268,-;DIFF=0.86:n1-9,c54t,c79t,a91g,a94g,c255t,c266t;LP=24;RP=12;RA=1;PRIOR=false;SR=7	0/0:-0,-13.25,-261.2	0/0:-0,-10.84,-214	0/0:-0.6,-13.25,-252.6	0/0:-0,-3.01,-60	0/0:-0,-9.03,-180	0/0:-0,-13.85,-276	0/0:-0,-16.86,-336	0/0:-0.6,-12.04,-228.6	0/1:-46.9,-9.03,-132	0/1:-46,-8.43,-118	0/0:-1.2,-11.44,-205.2	0/0:-0,-7.83,-156	0/0:-0,-11.44,-226	0/0:-0.6,-12.64,-240.6	0/1:-60,-11.44,-166	0/0:-0,-7.83,-156	0/0:-0,-9.63,-192	0/0:-0.6,-6.02,-108.6	0/0:-0,-12.64,-251.4	0/1:-72,-12.64,-180	0/0:-0,-10.24,-204	0/0:-0,-1.2,-24	0/0:-0,-3.61,-72	0/1:-94,-7.22,-47.1	0/1:-71.3,-9.63,-120	0/1:-69.8,-12.64,-174.6	0/0:-1.2,-10.84,-193.2	0/0:-0,-13.85,-274.8	0/0:-0,-10.84,-216	0/0:-0,-8.43,-168	0/0:-0,-9.03,-180	0/1:-35.1,-7.83,-120	0/0:-0,-9.63,-192	0/0:-0,-13.85,-276	0/1:-84,-10.24,-120	0/1:-60,-7.22,-84	0/1:-48,-6.02,-72	0/0:-0,-10.24,-204
chr7	3754099	T	<INS:ME:Bov-A2>	PASS	TSD=null;ASSESS=3;INTERNAL=XM_015471870.2,INTRONIC;SVTYPE=Bov-A2;SVLEN=269;MEINFO=Bov-A2,0,269,-;DIFF=1:a100g,c103t,g172a,g198a,g200a,g204a,g208a,g219a,c230t,t239c,a245g;LP=92;RP=86;RA=0.097;PRIOR=false;SR=22	0/0:-0,-9.63,-189.4	0/1:-74.7,-6.62,-16.02	0/1:-68,-10.24,-118.3	0/1:-59.5,-12.64,-176.9	0/0:-0.6,-8.43,-156.3	0/0:-0,-10.24,-204	0/0:-1.2,-9.63,-164.1	0/1:-108.7,-10.24,-56.13	0/0:-0,-10.24,-202	0/1:-35.3,-8.43,-118	0/0:-0,-10.24,-204	0/0:-0.3,-10.24,-190.3	0/1:-61.2,-11.44,-144.08	0/1:-32.33,-6.02,-66.16	1/1:-71.1,-5.42,-0.73	0/0:-0,-6.62,-132	0/0:-0,-14.45,-288	0/1:-94.7,-14.45,-163.31	0/1:-81.2,-11.44,-127.6	0/0:-0,-7.83,-156	0/1:-56.7,-10.84,-143.7	0/0:-0,-3.61,-72	0/0:-0,-12.64,-250.8	0/0:-0,-9.63,-191.9	0/1:-46.8,-7.22,-67.89	0/0:-0,-10.84,-212	0/0:-0,-10.84,-216	0/1:-48.73,-7.22,-78.6	0/0:-0,-10.24,-204	0/1:-92.2,-12.64,-141.5	0/0:-0,-12.04,-230	0/1:-34.6,-10.84,-168	0/0:-0,-12.04,-238	0/0:-0,-10.24,-202.9	1/1:-156.3,-10.84,-1.21	0/0:-0,-6.02,-118.2	0/0:-0,-10.24,-204	0/0:-0,-6.02,-120
chr7	10712556	C	<INS:ME:Bov-A2>	PASS	TSD=null;ASSESS=3;INTERNAL=null,null;SVTYPE=Bov-A2;SVLEN=267;MEINFO=Bov-A2,1,268,+;DIFF=0.96:i15cc,g39a,g55a,t67a,c87t,a91g,a94g,c103t,g112a,a152g,a187g,c240t,c255t,c258t,n268-269;LP=125;RP=51;RA=1.293;PRIOR=false;SR=19	0/1:-44.5,-25.89,-411.58	0/1:-50.11,-11.44,-115.18	0/1:-80.41,-18.06,-216.65	0/0:-0.86,-7.83,-105.3	0/1:-61.2,-14.45,-166.49	0/1:-37.99,-12.04,-134.73	0/1:-55.01,-20.47,-279.09	0/1:-43.14,-19.87,-270.54	0/1:-25.7,-21.67,-362.57	0/1:-46.3,-13.25,-172.18	0/1:-46.3,-16.86,-239.32	0/1:-26.11,-16.26,-258.72	0/0:-0.6,-7.83,-139.6	0/1:-42.27,-16.86,-250.83	0/1:-60.42,-14.45,-146.5	0/1:-30.5,-10.84,-146.16	0/1:-27.9,-10.24,-144.8	0/1:-64.5,-12.64,-142.22	0/1:-59.68,-9.03,-35.65	0/1:-23.12,-15.65,-239.6	0/1:-53.5,-19.27,-259.63	1/1:-23.5,-2.41,-0.13	0/0:-0.77,-6.02,-99.1	0/1:-36.13,-14.45,-201.94	0/1:-65.49,-16.26,-177.25	0/0:-0.63,-7.22,-114.6	0/1:-50.02,-21.67,-314.7	0/0:-1.81,-13.85,-239.81	0/1:-29.9,-13.25,-180.93	0/1:-20.4,-10.24,-163.81	0/1:-34.55,-13.85,-180.54	0/1:-63.9,-19.87,-244.89	1/1:-45.2,-4.82,-0.22	0/1:-68.05,-22.88,-292.23	0/1:-43.1,-9.03,-90	0/1:-16,-6.62,-96.12	0/1:-61.17,-13.25,-107.08	0/1:-18.22,-7.22,-80.91
chr7	10880505	T	<INS:ME:Bov-A2>	PASS	TSD=null;ASSESS=4;INTERNAL=null,null;SVTYPE=Bov-A2;SVLEN=267;MEINFO=Bov-A2,1,268,-;DIFF=0.76:c9a,g13t,c74a,g209a,n219-269;LP=20;RP=23;RA=-0.202;PRIOR=false;SR=8	0/0:-0.62,-34.32,-628.3	0/0:-1.05,-15.65,-218	0/0:-1.21,-25.89,-456.3	0/0:-1.21,-10.24,-177.9	0/0:-0.67,-17.46,-287.2	0/0:-0.14,-19.27,-323.9	0/0:-1.64,-29.5,-486.7	0/0:-1.4,-30.71,-501.4	0/0:-1.88,-22.28,-371.81	0/0:-1.1,-19.27,-297.1	0/0:-0.68,-18.66,-327.7	0/0:-0.01,-2.41,-35	0/0:-0,-14.45,-276.6	0/0:-0.66,-24.68,-453.4	0/0:-0.74,-13.25,-221.2	0/0:-0.6,-10.24,-182.2	0/0:-0.01,-3.61,-57.7	0/1:-82.91,-16.86,-227.9	0/0:-0.96,-21.07,-361.1	0/0:-0.6,-10.24,-179.6	0/0:-2.49,-22.28,-350.71	0/0:-1.21,-19.87,-336.7	0/0:-0,-1.2,-22	0/0:-0.09,-10.24,-184.8	0/0:-0.68,-16.26,-293.3	0/0:-0,-6.62,-126.9	0/0:-1.28,-17.46,-291.4	0/0:-0.06,-14.45,-261.1	0/0:-0.68,-22.28,-392.9	0/0:-0.6,-12.64,-238.5	0/1:-23.06,-13.85,-187.69	0/1:-42.48,-22.88,-332.54	0/0:-0.93,-12.64,-224	0/1:-41.46,-19.27,-285.91	0/0:-1.34,-21.07,-357.9	0/0:-1.33,-13.85,-225.4	0/0:-1.23,-19.87,-345.2	0/0:-0.78,-13.85,-232
chr7	11035818	G	<INS:ME:Bov-A2>	PASS	TSD=null;ASSESS=4;INTERNAL=XM_024994850.1,INTRONIC;SVTYPE=Bov-A2;SVLEN=269;MEINFO=Bov-A2,0,269,+;DIFF=0.98:t28c,g55a,c74t,g84a,c103t,t107c,g108c,g185a,g211a,g216a,g219a,g231a,c234t,c255t,n265;LP=779;RP=767;RA=0.022;PRIOR=false;SR=296	0/1:-560.13,-73.45,-637.73	0/1:-461.32,-46.36,-200.31	0/1:-500.54,-62.61,-533.17	0/1:-210.5,-20.47,-128.64	0/1:-394.05,-49.37,-437.17	0/1:-328.47,-39.13,-283.28	0/1:-486.73,-58.4,-489.92	0/1:-562.55,-59.6,-390.64	0/1:-277.2,-39.74,-425.79	0/1:-474.11,-60.81,-472.38	0/1:-430.05,-43.95,-304.94	1/1:-243.71,-20.47,-3.59	0/1:-243,-24.08,-127.18	0/1:-375.03,-46.36,-412.22	0/1:-295.45,-37.93,-285.45	0/1:-128.56,-21.67,-226.75	0/1:-195.3,-16.86,-84.07	0/1:-168.17,-19.27,-162.11	0/1:-625.81,-71.65,-497.53	0/1:-388.6,-31.91,-89.12	0/1:-409.56,-46.36,-364.8	0/1:-177.55,-31.91,-317.2	0/1:-164.9,-13.25,-52.6	0/1:-300.24,-33.11,-191.89	0/1:-243.33,-24.68,-163.25	0/1:-362.5,-40.34,-213.51	0/1:-250.04,-34.92,-332.84	0/1:-192.76,-24.68,-236.2	0/1:-403.1,-46.96,-409.22	0/1:-241.4,-29.5,-269.28	0/1:-233.08,-25.89,-155.84	0/1:-481.49,-53.58,-405.87	0/1:-290.96,-37.33,-328.84	0/1:-349.52,-46.96,-413.64	0/1:-694.1,-66.83,-414.32	0/1:-316.89,-30.71,-158.94	0/1:-682.91,-59,-246.31	0/1:-347.03,-35.52,-226.03
chr7	14157337	T	<INS:ME:Bov-A2>	PASS	TSD=null;ASSESS=3;INTERNAL=null,null;SVTYPE=Bov-A2;SVLEN=267;MEINFO=Bov-A2,1,268,+;DIFF=1:a10g,c54t,t64c,g65t,g88c,a91c,c119g,t133c,g172a,g198a,g204a,c218t,c230t,c234t,a235g,c240t,c246t;LP=123;RP=51;RA=1.27;PRIOR=false;SR=28	0/1:-55.5,-8.43,-92.31	0/1:-59.8,-6.62,-60	0/0:-0,-10.84,-203.6	0/0:-0,-4.82,-94	0/1:-62,-6.02,-48	0/1:-64,-10.24,-123.4	1/1:-94.6,-6.02,-0.6	0/0:-0,-10.24,-194.4	0/1:-103.9,-12.04,-114.7	0/1:-83.4,-9.03,-82	0/1:-30.24,-9.03,-123.3	0/0:-0,-8.43,-162.7	0/1:-120.8,-13.85,-129.7	0/1:-88.1,-7.83,-46.69	0/0:-0.3,-6.02,-110.3	0/1:-36.6,-6.62,-84	0/0:-0,-5.42,-102.4	0/1:-102,-8.43,-46	0/1:-52,-15.65,-244.3	0/0:-0,-14.45,-277	0/1:-90,-13.85,-164	1/1:-136.6,-9.63,-0.73	0/1:-20,-3.61,-44	0/1:-54.7,-8.43,-92.1	0/1:-69.4,-10.24,-116	0/0:-0,-8.43,-160.3	0/1:-70,-9.63,-104.8	0/1:-54.1,-10.24,-129.69	0/0:-0,-7.83,-148.8	0/1:-94,-11.44,-116.8	0/0:-0,-11.44,-218	0/1:-67.23,-11.44,-131.1	0/0:-0,-7.22,-139	0/0:-0,-14.45,-274.9	0/1:-94,-8.43,-58.4	0/1:-56,-5.42,-48	0/1:-80,-10.24,-104.2	0/1:-64,-7.22,-70
chr7	14272093	T	<INS:ME:Bov-A2>	PASS	TSD=dTAGGT;ASSESS=5;INTERNAL=XM_024994886.1,PROMOTER;SVTYPE=Bov-A2;SVLEN=259;MEINFO=Bov-A2,9,268,-;DIFF=0.95:n1-8,c54t,t67a,g88a,a91g,a94g,g99a,c103t,c117t,c161t,c168a,g195a,c197t,g202a,g231a,g241c,c255t,n265-269;LP=346;RP=326;RA=0.086;PRIOR=false;SR=161	1/1:-230.31,-15.65,-1.81	1/1:-204,-13.85,-1.26	1/1:-306.71,-20.47,-2.41	1/1:-253.1,-15.05,-0	0/1:-93.8,-11.44,-120	1/1:-220.6,-13.25,-0	0/1:-257.3,-18.06,-58	0/1:-110,-12.64,-117.5	0/1:-196,-22.28,-215.1	0/1:-147.8,-15.05,-107.75	0/1:-182.1,-19.27,-168	1/1:-94.6,-6.62,-0.7	1/1:-345.4,-21.07,-0.65	1/1:-313.5,-19.87,-1.21	0/0:-0,-8.43,-168	0/1:-84.7,-9.03,-71.25	1/1:-176.6,-10.24,-0	1/1:-263.4,-16.26,-0.6	1/1:-230.1,-14.45,-0.66	0/1:-79.3,-7.83,-60	0/1:-176.5,-12.64,-36.01	1/1:-185.51,-13.85,-2.53	1/1:-210.4,-13.25,-0.61	0/1:-54.5,-9.63,-120.01	1/1:-202.9,-12.64,-0.04	1/1:-297.6,-19.87,-1.53	0/1:-176.2,-13.85,-55.59	0/1:-116,-15.05,-168	1/1:-274.61,-18.66,-1.91	1/1:-175.2,-10.84,-0.01	1/1:-298.9,-19.87,-1.25	1/1:-262.3,-16.86,-0.91	1/1:-224.4,-13.85,-0.61	0/1:-98.4,-10.84,-96	1/1:-285.4,-16.86,-0	1/1:-200.3,-12.64,-0.6	1/1:-228.3,-13.85,-0.6	1/1:-202.5,-12.64,-0.6
chr7	16233776	C	<INS:ME:Bov-A2>	PASS	TSD=ACCTGATACCTGC;ASSESS=5;INTERNAL=XR_003035496.1,INTRONIC;SVTYPE=Bov-A2;SVLEN=267;MEINFO=Bov-A2,1,268,+;DIFF=1:c54t,a68g,g98a,g110a,t122g,g231a,c240t;LP=53;RP=62;RA=-0.226;PRIOR=false;SR=58	0/0:-0,-17.46,-348	0/0:-0,-10.84,-216	0/0:-0,-7.83,-156	0/1:-264,-22.28,-138	0/0:-0,-10.84,-216	0/0:-0,-10.24,-204	0/0:-0,-9.63,-192	0/0:-0,-10.24,-204	0/0:-0,-16.86,-336	0/0:-0,-11.44,-227.1	0/0:-0,-6.62,-132	0/1:-62,-6.62,-56	0/0:-0,-21.67,-432	0/0:-0,-7.83,-156	0/0:-0,-9.63,-192	0/0:-0,-3.01,-60	1/1:-219.2,-13.85,-1.2	0/0:-0,-15.05,-300	0/0:-0,-10.84,-216	0/0:-1.2,-8.43,-141.2	0/0:-0,-11.44,-227.8	0/0:-0,-11.44,-228	0/1:-94,-12.04,-130	0/1:-79.7,-12.04,-142	0/0:-0,-10.84,-216	0/1:-110,-15.05,-162	0/0:-0,-13.85,-276	0/0:-0,-9.63,-192	0/0:-0,-9.63,-192	0/0:-0,-7.83,-156	0/0:-0,-11.44,-228	0/0:-0,-13.25,-262	0/0:-0,-8.43,-168	0/0:-0,-10.24,-204	0/0:-0,-11.44,-228	0/1:-104,-12.64,-128	0/1:-166,-12.64,-58	0/0:-0,-5.42,-108
chr7	24046865	T	<INS:ME:Bov-A2>	PASS	TSD=AAAACAACAATCAT;ASSESS=5;INTERNAL=NM_001192652.1,INTRONIC;SVTYPE=Bov-A2;SVLEN=267;MEINFO=Bov-A2,1,268,+;DIFF=0.79:t28c,c106g,c123t,t142c,n241-269;LP=14;RP=7;RA=1;PRIOR=false;SR=18	0/0:-0,-12.04,-227.6	0/0:-0,-7.83,-152.1	0/0:-0,-9.03,-172.2	0/0:-0,-5.42,-98.3	0/0:-0,-16.86,-318.8	0/0:-0,-10.24,-194.4	0/0:-0,-14.45,-270.5	0/0:-0,-10.84,-204.6	0/0:-0,-18.06,-344	0/0:-0,-7.83,-143	0/0:-0,-13.25,-248	0/1:-81,-7.83,-72	0/0:-0,-7.22,-128.9	0/0:-0,-16.86,-315.3	0/0:-0,-9.63,-186	0/0:-0,-7.22,-132.1	0/0:-0.6,-1.81,-22.6	0/0:-0,-1.81,-36	0/0:-0,-15.65,-295.1	0/0:-0.22,-4.82,-86.4	0/0:-0,-14.45,-276.5	0/0:-0,-2.41,-46	0/0:-0,-4.21,-82	0/1:-75.8,-6.62,-48.01	0/0:-1.2,-8.43,-139.5	0/1:-31.2,-9.03,-130.63	0/0:-0,-13.25,-249.7	0/0:-0,-14.45,-264.3	0/0:-0.6,-7.22,-124.9	0/0:-0,-12.04,-221.6	1/1:-24.6,-1.81,-0.6	0/0:-0,-9.63,-179	0/0:-0,-9.63,-184	0/0:-0,-15.65,-293.3	0/0:-0,-6.02,-115.4	0/0:-0.22,-3.01,-54.4	0/0:-0,-6.02,-116.3	0/0:-0,-7.83,-144
chr7	24773536	G	<INS:ME:Bov-A2>	PASS	TSD=null;ASSESS=4;INTERNAL=null,null;SVTYPE=Bov-A2;SVLEN=269;MEINFO=Bov-A2,0,269,+;DIFF=0.98:t67a,g88a,a91g,a94g,g231a,c255t,n264-269;LP=10;RP=16;RA=-0.678;PRIOR=false;SR=9	0/0:-0,-10.84,-216	0/0:-0,-7.83,-156	0/0:-0,-14.45,-288	0/0:-0,-7.83,-156	0/0:-0,-11.44,-228	0/0:-0,-10.24,-204	0/0:-0,-12.64,-252	0/0:-0,-6.02,-120	0/0:-0,-20.47,-408	0/0:-0,-7.83,-156	0/0:-0,-18.06,-360	0/1:-66,-9.63,-120	0/0:-0,-16.26,-322	0/0:-0,-12.64,-252	0/0:-0,-11.44,-228	0/0:-0,-6.62,-132	0/0:-0,-5.42,-108	0/0:-0,-10.24,-204	0/0:-0,-11.44,-227.1	0/0:-0,-6.02,-120	0/0:-0,-18.66,-372	0/0:-0,-4.21,-84	0/0:-0,-12.64,-252	1/1:-92.8,-6.02,-0.6	0/0:-0,-7.22,-144	0/0:-0,-14.45,-288	0/0:-0,-9.03,-180	0/0:-0,-10.84,-216	0/0:-0,-12.04,-240	0/0:-0,-8.43,-168	0/0:-0,-15.05,-300	0/0:-0,-8.43,-168	0/0:-0,-15.65,-312	0/0:-0,-12.64,-252	0/0:-0,-10.84,-216	0/0:-0,-9.03,-180	0/1:-198,-16.26,-96	0/0:-0,-9.03,-180
chr7	28210120	T	<INS:ME:Bov-A2>	PASS	TSD=null;ASSESS=3;INTERNAL=null,null;SVTYPE=Bov-A2;SVLEN=267;MEINFO=Bov-A2,1,268,+;DIFF=0.7:c17t,c18g,c54t,a68g,g93c,g112a,g150a,c165t,c197t,g200a,g204c,g209t,c218t,g219a,n225-269;LP=11;RP=18;RA=-0.71;PRIOR=false;SR=15	0/0:-0.77,-15.05,-276.3	0/0:-1.2,-9.03,-145.2	0/0:-0,-10.24,-200.4	0/0:-0,-10.24,-198.1	0/0:-0,-9.03,-176.2	0/0:-1.2,-8.43,-135.6	0/0:-0,-12.64,-248.5	0/0:-0,-13.25,-255.1	0/0:-0.6,-13.85,-258.9	0/0:-0,-9.03,-175.7	0/0:-0.6,-11.44,-214.6	0/0:-0,-5.42,-105.2	0/0:-0,-18.06,-348	0/0:-0,-10.84,-212.6	0/0:-0,-10.84,-212.8	0/0:-0,-9.63,-190	0/0:-0,-1.81,-30.4	0/0:-0,-13.85,-270.9	0/0:-0,-13.85,-266	0/0:-0.01,-7.83,-151.9	0/0:-0,-12.64,-248.5	0/0:-0,-7.22,-144	0/0:-0,-8.43,-167.7	0/0:-1.2,-9.03,-147.1	0/0:-0,-6.62,-119.3	0/1:-24,-6.62,-102	0/0:-0.03,-9.03,-169	0/0:-0,-12.04,-238.7	0/0:-0,-9.03,-174	0/0:-0,-10.84,-212	0/1:-60.46,-7.83,-81.6	0/0:-0.6,-9.03,-164.6	0/0:-0,-11.44,-224.2	0/0:-0,-11.44,-222.4	0/0:-0,-12.04,-229	0/0:-0,-2.41,-48	0/1:-72,-5.42,-30	0/0:-0.6,-9.03,-162
chr7	35322474	A	<INS:ME:Bov-A2>	PASS	TSD=dGTGTATTGGGGTTTTTTTGCAATATTT;ASSESS=5;INTERNAL=null,null;SVTYPE=Bov-A2;SVLEN=262;MEINFO=Bov-A2,6,268,+;DIFF=0.86:n1-5,c63t,g76a,g88a,c89t,c97t,g104a,c197t,g208t,g212a,c218t,c240t,g247a;LP=9;RP=11;RA=-0.29;PRIOR=false;SR=18	0/0:-0,-13.25,-262.8	0/1:-46,-9.63,-143.4	0/0:-0.65,-8.43,-142.5	0/0:-0,-2.41,-48	0/0:-0,-9.03,-180	0/0:-0.6,-10.24,-183.2	0/1:-60,-11.44,-164	0/0:-0.01,-9.63,-187.6	0/1:-60,-9.63,-125.5	0/0:-0,-7.22,-144	0/0:-0.6,-11.44,-212.6	0/1:-59.4,-11.44,-166	0/1:-53.17,-12.64,-167.3	0/0:-0.73,-11.44,-205.8	0/1:-174.34,-14.45,-100.9	0/0:-1.2,-8.43,-145.2	0/0:-1.23,-8.43,-131.9	0/0:-0,-2.41,-48	0/0:-0,-6.62,-130.7	0/1:-48,-9.63,-141.9	0/0:-0,-10.24,-204	0/1:-24,-3.61,-47.7	0/0:-1.2,-1.2,-1.2	0/1:-94,-10.24,-105.9	0/1:-72,-12.04,-165.6	0/1:-57,-12.64,-186.5	0/0:-0.6,-9.63,-174.7	0/1:-83.6,-10.24,-118	0/1:-48.25,-10.24,-143.1	0/1:-68.02,-9.03,-99.3	0/1:-67.7,-9.03,-108.01	0/0:-0.6,-13.25,-247.9	0/0:-0,-11.44,-228	0/0:-1.21,-9.03,-150.4	0/0:-1.2,-1.2,-1.2	0/1:-22,-5.42,-83.8	0/0:-1.23,-9.03,-144.4	0/0:-0,-4.21,-79.8
chr7	41530533	A	<INS:ME:Bov-A2>	PASS	TSD=null;ASSESS=4;INTERNAL=XM_002689092.5,TERMINATOR;SVTYPE=Bov-A2;SVLEN=267;MEINFO=Bov-A2,1,268,-;DIFF=0.44:c9a,n17,c32t,n38,a42g,c54g,n59-141,g172a,t173c,c175t,g193t,c197g,g200a,g202a,g211a,g216a,c218a,t222c,g231a,c234a,g241a,g256a,n261-269;LP=63;RP=49;RA=0.363;PRIOR=false;SR=34	0/0:-0.13,-9.03,-168.4	0/0:-0.76,-7.83,-112.8	0/0:-0,-14.45,-288	0/0:-0.03,-7.83,-139.2	0/0:-1.2,-17.46,-305.1	0/0:-0,-12.04,-240	0/0:-0,-12.64,-251.2	0/0:-0.6,-15.05,-268.5	0/0:-1.96,-16.86,-264.21	0/0:-0,-10.84,-187.5	0/0:-0.63,-18.06,-327	0/0:-0,-12.04,-222.4	0/0:-0.13,-15.65,-263.7	0/0:-0,-15.65,-310	0/0:-0.13,-8.43,-138.4	0/0:-0,-10.24,-169.1	0/0:-0,-6.02,-119	0/0:-0,-8.43,-152	0/0:-0.06,-12.64,-227	0/0:-0.63,-9.03,-156	0/0:-0.6,-12.64,-219.4	0/0:-0.63,-5.42,-74.2	0/0:-0,-12.04,-238.7	0/0:-0,-10.24,-184.3	0/0:-0,-6.62,-125.3	0/0:-0,-9.03,-163.6	0/0:-0.03,-10.84,-201	0/0:-0,-16.86,-333.3	0/0:-1.21,-14.45,-242.7	0/0:-0,-11.44,-219.6	0/0:-0.13,-6.62,-115.3	0/1:-47,-12.64,-182.5	0/0:-0.6,-10.24,-183.1	0/0:-1.21,-12.04,-189	0/1:-60,-10.84,-145.9	0/0:-0,-6.02,-119.4	0/0:-0,-7.83,-151.4	0/0:-0.6,-6.62,-114.6
chr7	44742737	T	<INS:ME:Bov-A2>	PASS	TSD=null;ASSESS=3;INTERNAL=null,null;SVTYPE=Bov-A2;SVLEN=269;MEINFO=Bov-A2,0,269,-;DIFF=0.98:c37t,g66t,g76a,g88a,g98a,g112a,a160g,g198a,c244a,c255t,n265-269;LP=82;RP=42;RA=0.965;PRIOR=false;SR=16	0/0:-0,-12.64,-243.9	0/0:-0,-7.83,-152.5	1/1:-98,-7.83,-0.72	1/1:-57.6,-4.82,-0.07	0/0:-0,-13.85,-271.1	0/0:-0,-13.85,-276	0/0:-0,-16.26,-321.5	0/1:-36.6,-9.63,-120.05	0/1:-56.3,-11.44,-144.22	0/0:-0.01,-7.83,-130.2	0/1:-25.8,-9.03,-138	1/1:-25,-3.01,-1.59	0/1:-39,-9.03,-110.18	0/1:-40.5,-14.45,-223.67	0/0:-0.01,-10.24,-184.5	0/0:-0,-4.21,-67.3	1/1:-75.3,-7.22,-1.36	0/1:-46.7,-5.42,-47.05	0/0:-0.17,-17.46,-335.6	1/1:-108.7,-9.63,-0.67	0/0:-0,-18.66,-367.6	0/0:-0,-3.01,-58.2	0/1:-74.3,-8.43,-48.25	1/1:-27.8,-3.01,-0.95	0/1:-36.77,-7.22,-65.8	0/1:-23.65,-3.61,-19.6	0/0:-0,-14.45,-287.7	0/0:-0,-12.04,-233	0/1:-32.6,-9.63,-124.72	0/0:-0,-18.06,-354.2	0/0:-0,-6.02,-109.1	0/0:-0,-19.27,-382	0/0:-0,-12.04,-240	0/0:-0,-10.84,-211.9	0/0:-0.6,-6.62,-116.7	0/0:-0,-1.2,-24	1/1:-25.7,-2.41,-0.61	0/1:-61.1,-7.83,-60.11
chr7	57740149	G	<INS:ME:Bov-A2>	PASS	TSD=null;ASSESS=4;INTERNAL=null,null;SVTYPE=Bov-A2;SVLEN=269;MEINFO=Bov-A2,0,269,+;DIFF=0.94:c46t,c54t,g88a,g104a,c111t,t129c,a137c,g194a,g199a,g209a,c218t,c230t,c240t,n261;LP=18;RP=7;RA=1.363;PRIOR=false;SR=11	0/0:-0,-11.44,-228	0/0:-0,-3.61,-72	0/0:-0,-12.04,-240	0/0:-0,-10.24,-204	0/0:-0,-10.24,-204	0/0:-0,-7.22,-144	0/0:-0,-11.44,-227.5	0/0:-0,-7.83,-156	0/0:-0,-18.06,-360	0/0:-0,-8.43,-168	0/0:-0,-10.24,-204	0/0:-0,-9.03,-180	0/0:-0,-14.45,-288	0/0:-0,-10.84,-216	0/0:-0,-6.02,-118	0/0:-0,-6.62,-132	0/1:-150,-13.85,-108	0/0:-0,-3.61,-72	0/0:-0,-15.65,-311.8	0/0:-0,-9.63,-192	0/0:-0,-12.04,-240	0/0:-0,-4.82,-96	0/0:-0,-7.22,-144	0/0:-0,-10.84,-216	0/0:-0,-9.63,-192	0/0:-0,-5.42,-108	0/0:-0,-15.65,-310	0/0:-0,-16.26,-324	0/0:-0,-9.63,-192	0/0:-0,-9.63,-192	0/1:-74,-7.83,-72	0/0:-0,-12.04,-240	0/0:-0,-9.63,-192	0/0:-0,-10.84,-216	0/0:-0,-17.46,-348	0/0:-0,-12.64,-252	0/1:-104,-12.64,-132	0/0:-0,-9.63,-192
chr7	60093685	A	<INS:ME:Bov-A2>	PASS	TSD=null;ASSESS=4;INTERNAL=null,null;SVTYPE=Bov-A2;SVLEN=267;MEINFO=Bov-A2,1,268,-;DIFF=0:a5t,c9a,c17g,c22t,t23g,c30t,c32t,g55a,a68g,n74-269;LP=1;RP=2;RA=-1;PRIOR=false;SR=5	0/0:-0,-14.45,-288	0/1:-34.5,-10.24,-159.2	0/0:-0,-14.45,-285.3	0/0:-0,-6.02,-120	0/0:-1.81,-14.45,-251.41	0/0:-1.81,-15.65,-275.71	0/0:-1.2,-15.65,-285.2	0/0:-0,-18.06,-351.7	0/0:-0.6,-19.87,-383.9	0/1:-56.02,-9.63,-124.6	0/0:-0,-12.64,-252	0/1:-48,-16.86,-287	0/0:-1.81,-14.45,-252.41	0/0:-0.6,-10.84,-202.4	0/0:-0,-9.63,-191.2	0/0:-0,-5.42,-108	0/0:-0,-11.44,-226	0/1:-48,-7.22,-96	0/0:-0,-14.45,-285.6	0/1:-56.4,-11.44,-167.6	0/0:-0,-9.63,-191.3	0/0:-0,-4.82,-95.2	0/0:-0.6,-12.04,-228.6	0/1:-70,-9.63,-117.6	0/0:-1.2,-8.43,-142.6	0/0:-0,-12.64,-242.5	0/0:-0,-9.03,-180	0/0:-1.2,-9.03,-156.6	0/0:-0,-15.65,-312	0/0:-0,-15.65,-312	0/0:-1.2,-9.03,-150.8	0/0:-0,-14.45,-288	0/0:-1.2,-17.46,-325.2	0/1:-59.5,-11.44,-166.7	0/0:-0.6,-10.24,-192.6	0/0:-0,-9.63,-192	0/0:-0.6,-8.43,-156.6	0/0:-1.2,-7.83,-133.2
chr7	62893073	A	<INS:ME:Bov-A2>	PASS	TSD=GAAAGATCCTCATA;ASSESS=5;INTERNAL=NM_174464.2,INTRONIC;SVTYPE=Bov-A2;SVLEN=268;MEINFO=Bov-A2,1,269,-;DIFF=0.94:n1,a21t,a26g,t50c,a68g,c87t,c111t,a118c,c161t,g219a,g231a,c246t,a252c,n256-269;LP=36;RP=21;RA=0.778;PRIOR=false;SR=29	0/0:-0,-12.64,-248	0/0:-0,-7.22,-144	0/0:-0,-10.24,-204	0/0:-0,-13.25,-262	0/0:-0,-9.63,-192	0/0:-0,-12.04,-240	0/0:-0,-11.44,-228	0/0:-0,-9.63,-192	0/1:-112,-16.86,-204	0/1:-128,-10.24,-56	0/0:-0,-10.24,-204	0/0:-0,-8.43,-168	0/0:-0,-16.86,-336	0/0:-0,-12.04,-240	0/1:-42,-9.03,-126	0/0:-0,-4.82,-96	0/0:-0,-10.84,-216	0/0:-0,-6.62,-131.8	0/0:-0,-12.04,-239.4	0/0:-0,-10.84,-216	0/0:-0,-9.03,-180	0/0:-0,-5.42,-108	0/0:-0,-15.65,-312	0/1:-124,-12.04,-96	0/0:-0,-9.63,-192	0/0:-0,-7.22,-144	0/0:-0,-9.03,-180	1/1:-222.6,-13.85,-0.6	0/0:-0,-6.62,-132	0/0:-0,-9.03,-180	0/0:-0,-9.63,-192	0/0:-0,-10.24,-204	0/0:-0,-10.24,-203.1	0/0:-0,-9.63,-192	0/0:-0,-13.85,-276	0/0:-0,-13.85,-276	0/0:-0,-10.84,-216	0/0:-0,-8.43,-167
chr7	65289189	T	<INS:ME:Bov-A2>	PASS	TSD=null;ASSESS=3;INTERNAL=XR_807954.3,TERMINATOR;SVTYPE=Bov-A2;SVLEN=269;MEINFO=Bov-A2,0,269,-;DIFF=1:a53g,c63t,g73a,c74a,g98t,c125t,t142a,c197t,g209a,c218t,c221t;LP=18;RP=15;RA=0.263;PRIOR=false;SR=6	0/0:-0,-23.48,-468	1/1:-347.2,-21.67,-1.21	0/0:-0,-15.65,-312	0/0:-0,-9.03,-180	0/0:-0,-15.05,-300	0/0:-0,-8.43,-168	0/0:-0,-10.24,-200.5	0/0:-0,-14.45,-288	0/0:-0,-13.25,-264	0/0:-0,-6.62,-132	0/0:-0,-10.84,-216	0/0:-0,-13.25,-264	0/0:-0,-18.06,-360	0/0:-0,-6.62,-131.9	0/0:-0,-12.04,-240	0/0:-0,-7.22,-142	0/0:-0,-9.63,-192	0/0:-0,-3.61,-72	0/0:-0,-14.45,-283.5	0/0:-0,-14.45,-288	0/0:-0,-13.85,-276	0/0:-0,-6.02,-120	0/0:-0,-13.85,-276	0/0:-0,-11.44,-228	0/0:-0,-12.04,-240	0/0:-0,-10.24,-204	0/0:-0,-12.64,-252	0/0:-0,-10.84,-216	0/0:-0,-8.43,-166	0/0:-0,-10.84,-216	0/0:-0,-7.22,-144	0/0:-0,-8.43,-168	0/0:-0,-10.24,-204	0/0:-0,-11.44,-226	0/0:-0,-14.45,-288	0/0:-0,-5.42,-106	0/0:-0,-4.21,-84	0/0:-0,-7.22,-144
chr7	67625384	A	<INS:ME:Bov-A2>	PASS	TSD=CA;ASSESS=5;INTERNAL=XR_003035679.1,INTRONIC;SVTYPE=Bov-A2;SVLEN=267;MEINFO=Bov-A2,1,268,-;DIFF=0.41:a5g,c9a,c17a,c24g,c30t,t31g,g55a,g58a,t67c,g73a,t90a,g95a,g98a,a102g,c103t,n112-142,n166-269;LP=8;RP=8;RA=0;PRIOR=false;SR=25	0/0:-0,-9.63,-192	0/1:-82.5,-8.43,-72	0/1:-60,-12.04,-179.2	0/1:-30.2,-9.63,-154.05	0/0:-1.23,-12.64,-221.6	0/1:-52.9,-11.44,-168	0/0:-1.26,-13.25,-236.1	0/0:-0,-12.04,-239	0/0:-0.6,-17.46,-336.6	0/0:-0,-8.43,-168	0/0:-0,-14.45,-288	1/1:-79.1,-5.42,-0.6	0/1:-228.7,-23.48,-216.1	0/0:-0,-8.43,-164.7	0/1:-59.8,-11.44,-156.01	0/0:-0,-7.83,-154.8	0/0:-0,-6.02,-120	0/0:-0,-13.85,-276	0/1:-83.7,-10.84,-116.01	1/1:-128.9,-7.83,-1.21	0/0:-0,-10.24,-204	0/0:-0,-9.03,-178	0/1:-145.6,-11.44,-70.06	0/0:-0,-3.61,-72	0/1:-96.3,-10.84,-108	0/1:-33.2,-9.63,-156	0/0:-0,-15.65,-312	0/0:-0.6,-16.26,-312.6	0/0:-0,-13.85,-276	0/0:-0,-12.64,-252	0/1:-102.4,-9.63,-60.21	0/1:-48.4,-10.84,-152.75	0/0:-0,-10.84,-216	0/0:-0.6,-9.63,-180.6	0/1:-109.6,-11.44,-108	0/0:-0.6,-6.62,-120.6	0/1:-79.2,-7.83,-70	0/1:-34.4,-6.62,-96
chr7	74691042	C	<INS:ME:Bov-A2>	PASS	TSD=C;ASSESS=5;INTERNAL=null,null;SVTYPE=Bov-A2;SVLEN=267;MEINFO=Bov-A2,1,268,+;DIFF=0.22:c9g,c17a,c30t,g55a,a60c,n67-269;LP=1;RP=4;RA=-2;PRIOR=false;SR=12	0/0:-0,-14.45,-288	0/0:-0,-9.03,-180	0/0:-0,-15.65,-308	0/0:-0,-7.22,-144	0/0:-0,-12.64,-252	0/0:-0,-14.45,-288	0/0:-0,-18.06,-360	0/0:-0,-10.84,-216	0/0:-0,-16.26,-324	0/0:-0,-11.44,-228	0/0:-0,-13.85,-276	0/1:-72.9,-6.62,-34.66	0/0:-0.6,-18.06,-347.9	0/0:-0,-19.87,-396	0/0:-0,-13.25,-264	0/0:-0,-9.03,-180	0/0:-0.6,-6.62,-114.6	0/0:-0,-7.83,-156	0/0:-0,-15.65,-312	0/0:-0.6,-7.83,-144.6	0/0:-0,-15.65,-309.4	0/0:-0,-3.01,-60	0/0:-0.03,-9.63,-180.6	0/0:-1.2,-8.43,-145.2	0/0:-0,-8.43,-168	0/0:-0,-10.84,-216	0/0:-0,-9.63,-192	0/0:-0,-15.65,-312	0/0:-0,-9.63,-192	0/0:-0,-14.45,-287.9	0/1:-44,-10.84,-164	0/0:-0,-13.85,-276	0/0:-0,-13.25,-264	0/1:-70,-12.64,-171	0/0:-0,-4.21,-84	0/0:-0,-9.03,-180	0/0:-0,-7.83,-156	0/0:-0,-13.25,-264
chr7	77272311	C	<INS:ME:Bov-A2>	PASS	TSD=dTCTGGAGTGTAGA;ASSESS=5;INTERNAL=null,null;SVTYPE=Bov-A2;SVLEN=267;MEINFO=Bov-A2,1,268,+;DIFF=0.43:a10g,c54t,g73a,g85t,c87t,g88c,t90a,a92t,c103t,c114t,n119-269;LP=19;RP=27;RA=-0.507;PRIOR=false;SR=31	0/0:-1.2,-10.24,-177.5	0/0:-0.6,-10.84,-194.6	0/0:-0,-16.86,-333.3	0/0:-0,-4.21,-84	0/0:-0.66,-9.03,-163.5	0/0:-0.61,-13.25,-240.5	0/0:-1.2,-9.03,-157.2	0/0:-0.6,-10.84,-197	0/0:-0,-13.85,-271.6	0/0:-0.09,-7.83,-137.4	0/0:-0,-15.05,-294	0/0:-0.64,-6.02,-81.9	0/0:-1.81,-15.65,-271.81	0/0:-0.6,-12.64,-239.8	0/0:-0.6,-7.22,-127	0/0:-0.6,-6.02,-104.3	0/1:-22,-6.62,-108	0/0:-0.61,-7.83,-138.4	0/0:-0,-12.64,-246.7	0/0:-0,-6.02,-115.6	0/0:-1.81,-15.65,-275.51	0/1:-20.8,-4.82,-62.3	0/0:-0,-5.42,-108	0/1:-76.23,-13.85,-169.61	0/0:-1.25,-7.22,-102.1	0/0:-1.2,-10.84,-172.2	0/0:-1.2,-12.64,-229.2	0/0:-0,-10.24,-204	0/1:-48,-15.05,-252	0/0:-0,-12.64,-252	0/0:-1.21,-10.24,-166.7	0/0:-0.6,-8.43,-154.6	0/0:-0.6,-9.63,-180.6	0/0:-0.6,-11.44,-212.1	0/0:-0.6,-7.22,-123.2	0/1:-36,-5.42,-72	0/0:-0,-7.22,-136.7	0/0:-0,-6.62,-131.4
chr7	80359131	C	<INS:ME:Bov-A2>	PASS	TSD=AGACTATTATTC;ASSESS=5;INTERNAL=XM_002689365.6,INTRONIC;SVTYPE=Bov-A2;SVLEN=266;MEINFO=Bov-A2,2,268,-;DIFF=1:n1,c54t,a68g,g69c,g70c,g88t,c89t,c103t,a131c;LP=21;RP=14;RA=0.585;PRIOR=false;SR=11	0/0:-0,-10.84,-216	0/0:-0,-10.84,-215.6	0/0:-0,-11.44,-224	0/0:-0,-6.02,-120	0/0:-0,-12.04,-240	0/0:-0,-8.43,-167.7	0/0:-0,-9.63,-192	0/0:-0,-10.84,-216	0/0:-0,-7.83,-156	0/0:-0,-7.22,-141	0/0:-0,-11.44,-227.6	0/1:-44,-6.62,-78	0/0:-0,-13.85,-272.2	0/0:-0,-12.04,-239.5	0/0:-0,-5.42,-106.6	0/0:-0,-6.62,-132	0/1:-72,-12.64,-142	0/0:-0,-9.03,-180	0/0:-0,-7.83,-156	0/1:-44,-7.83,-90	0/0:-0,-5.42,-108	0/0:-0,-3.61,-70	0/0:-0,-7.83,-156	0/1:-78,-9.63,-104	0/1:-40,-8.43,-118	0/0:-1.2,-7.83,-125.4	0/0:-0,-17.46,-346.1	0/0:-0,-12.64,-250.8	0/0:-0,-6.02,-119.4	0/0:-0,-15.05,-299.9	0/0:-0,-9.63,-190	0/0:-0,-13.85,-276	0/0:-0,-8.43,-166	0/0:-0,-6.62,-132	0/0:-0,-9.03,-180	0/1:-32,-9.03,-134.6	0/1:-62.6,-12.64,-168.13	0/0:-0,-5.42,-108
chr7	80746480	T	<INS:ME:Bov-A2>	PASS	TSD=null;ASSESS=3;INTERNAL=NM_001077883.1,INTRONIC;SVTYPE=Bov-A2;SVLEN=267;MEINFO=Bov-A2,1,268,+;DIFF=0.85:c24g,c54t,g98a,g112a,g185a,c197t,c255t,n268-269;LP=69;RP=65;RA=0.086;PRIOR=false;SR=8	0/0:-0,-17.46,-348	0/0:-0,-10.24,-204	0/0:-0,-10.24,-202	0/1:-70,-7.83,-66	0/0:-0,-12.64,-252	0/0:-0,-10.84,-216	0/0:-0,-13.25,-264	0/0:-0.03,-16.26,-318.6	0/0:-0,-10.84,-216	0/0:-0,-10.24,-202	0/0:-0,-10.24,-202	0/1:-32,-9.63,-148.4	0/0:-0,-8.43,-163	0/0:-0,-8.43,-168	0/0:-0,-9.63,-191.9	0/0:-0,-6.02,-120	1/1:-142.4,-9.63,-1.2	0/0:-0,-5.42,-108	0/0:-0,-12.04,-240	1/1:-138.4,-9.03,-1.2	0/0:-0,-11.44,-226.3	0/0:-0,-1.2,-22	0/0:-0,-2.41,-48	0/0:-0,-9.63,-192	0/0:-0,-13.25,-262	0/0:-0,-8.43,-168	0/0:-0,-14.45,-288	0/0:-0,-11.44,-228	0/0:-0,-9.63,-190	0/0:-0.01,-15.65,-306.9	0/0:-0,-9.03,-180	0/0:-0,-11.44,-226	0/0:-0,-12.04,-238.2	0/1:-49.9,-7.22,-80	0/0:-0,-6.02,-120	0/0:-0,-11.44,-227.1	0/0:-0,-10.24,-204	0/0:-0,-7.22,-144
chr7	81612370	T	<INS:ME:Bov-A2>	PASS	TSD=null;ASSESS=3;INTERNAL=XM_005209713.4,INTRONIC;SVTYPE=Bov-A2;SVLEN=267;MEINFO=Bov-A2,1,268,+;DIFF=0.42:g55a,t81c,c87t,a91g,a94g,g112a,n136-269;LP=25;RP=10;RA=1.322;PRIOR=false;SR=80	0/0:-0,-12.64,-252	0/0:-0.05,-10.24,-195	0/0:-1.2,-12.64,-229.2	0/1:-8.2,-4.21,-61.37	0/0:-1.81,-16.26,-287.81	0/0:-0.6,-14.45,-276.6	0/0:-1.2,-19.87,-373.2	0/0:-1.2,-16.26,-301.2	0/0:-2.41,-20.47,-360.71	0/0:-1.2,-12.04,-214.8	0/0:-0,-13.85,-276	0/0:-0.6,-8.43,-156.6	0/0:-1.81,-15.05,-265.81	0/0:-0.6,-13.85,-262.6	0/1:-36.3,-11.44,-170.06	0/0:-1.2,-8.43,-145.2	0/0:-0,-4.21,-84	0/0:-0,-7.22,-142	0/0:-0,-16.26,-324	0/0:-0,-9.03,-180	0/0:-1.81,-16.86,-301.81	0/1:-20.5,-6.02,-82.91	0/0:-0,-6.02,-120	0/0:-0.6,-9.03,-165.9	0/0:-0.6,-9.03,-168.6	0/0:-0,-12.04,-240	0/0:-0,-8.43,-168	0/0:-1.81,-16.86,-301.81	0/1:-41.7,-13.85,-205.2	0/0:-1.2,-13.85,-253.2	0/0:-0,-10.84,-216	0/0:-0.6,-7.83,-144.6	0/0:-1.65,-12.04,-206	0/0:-0.6,-12.64,-240.6	0/0:-0,-9.03,-180	0/0:-0.6,-9.63,-180.6	0/0:-0,-10.24,-204	0/0:-0,-7.83,-156
chr7	82916403	G	<INS:ME:Bov-A2>	PASS	TSD=dACCA;ASSESS=5;INTERNAL=NM_001114511.1,INTRONIC;SVTYPE=Bov-A2;SVLEN=267;MEINFO=Bov-A2,1,268,+;DIFF=0.79:c24t,g55a,g73a,t90a,g93a,g98a,c103g,n117,c179t,c180a,g198a,g200c,c230a,g231a,c240t,g247a,n255-269;LP=4;RP=8;RA=-1;PRIOR=false;SR=8	0/0:-0,-11.44,-228	0/1:-42,-10.24,-144.5	0/0:-0,-8.43,-168	0/1:-70,-10.84,-140.8	0/0:-0,-10.24,-204	0/0:-0.6,-10.24,-192.6	0/0:-0.01,-8.43,-161.8	0/0:-0,-11.44,-228	0/0:-0,-10.84,-216	0/0:-0,-10.24,-204	0/0:-0,-12.64,-248	0/0:-0,-7.22,-143.1	0/0:-0,-15.05,-300	0/0:-0,-12.04,-240	0/0:-0,-9.63,-192	0/0:-0,-7.83,-156	0/0:-0,-7.83,-156	0/0:-0,-15.05,-300	0/0:-0,-15.05,-300	0/0:-0,-12.04,-240	0/0:-0,-12.04,-240	0/0:-0,-2.41,-48	0/0:-0,-7.83,-156	0/1:-26.2,-6.02,-82.53	0/0:-0,-9.03,-180	0/0:-0.6,-9.03,-162.6	0/0:-0,-10.24,-204	0/0:-0,-7.22,-144	0/0:-0,-10.24,-204	0/0:-0,-13.85,-274	0/0:-0.04,-9.63,-187.1	0/0:-0,-12.64,-251.3	0/0:-0,-19.27,-381.9	0/0:-0,-7.83,-155.3	0/0:-0,-9.63,-192	0/0:-0,-10.84,-216	0/0:-0,-10.24,-204	0/0:-0,-4.82,-96
chr7	86806546	C	<INS:ME:Bov-A2>	PASS	TSD=null;ASSESS=4;INTERNAL=null,null;SVTYPE=Bov-A2;SVLEN=266;MEINFO=Bov-A2,3,269,+;DIFF=0.93:n1-3,c18t,c54t,i56c,g56c,a57c,a68g,c74t,t81a,a102g,c103g,t107c,g112a,a137c,t155c,g157a,c165t,g178a,a192g,i198ag,g202a,g209a,g216t,c218t,g225a,g247a,g251a,n269;LP=12;RP=9;RA=0.415;PRIOR=false;SR=8	0/0:-0,-21.07,-420	0/1:-30,-7.22,-106	0/0:-0,-16.86,-336	0/0:-0,-6.02,-120	0/0:-0,-9.63,-192	0/0:-0,-9.63,-192	0/0:-0,-13.25,-264	0/0:-0,-9.63,-192	0/0:-0.02,-13.25,-257.3	0/0:-0,-13.25,-263.9	0/0:-0,-17.46,-348	0/1:-46.3,-7.83,-106	0/0:-0,-18.06,-359.5	0/0:-0,-19.27,-384	0/0:-0,-9.63,-190.4	0/0:-0,-7.22,-142	0/0:-0,-7.83,-156	0/1:-49.6,-7.22,-80	0/0:-0,-13.85,-276	0/0:-0,-12.04,-240	0/0:-0,-15.65,-311.6	0/0:-0,-6.62,-132	0/0:-0,-12.64,-252	0/1:-49.5,-12.04,-173.6	0/0:-0,-6.02,-120	0/0:-0,-12.64,-252	0/0:-0,-10.84,-215.6	0/0:-0,-14.45,-288	0/0:-0,-18.06,-360	0/0:-0,-11.44,-228	0/0:-0,-10.24,-204	0/0:-0,-11.44,-228	0/0:-0,-12.04,-240	0/0:-0,-15.05,-300	0/0:-0,-12.64,-252	0/0:-0,-11.44,-228	0/0:-0,-6.62,-132	0/0:-0,-7.22,-144
chr7	95849555	A	<INS:ME:Bov-A2>	PASS	TSD=dGG;ASSESS=5;INTERNAL=XR_808046.3,INTRONIC;SVTYPE=Bov-A2;SVLEN=261;MEINFO=Bov-A2,7,268,+;DIFF=0.18:n1-6,n16,a29g,c30t,c37t,a42g,t50g,g55a,a57g,n65-66,a68g,n73,a75c,n76-77,c79t,n82-87,g88a,n90-91,n97-99,g104a,n110-147,c180t,g182a,t207a,g208c,c217t,g219a,g231a,c255t,t260c,n268-269;LP=1;RP=4;RA=-2;PRIOR=false;SR=7	0/0:-0,-16.86,-336	0/0:-0,-10.84,-216	0/0:-0,-16.86,-336	0/0:-0,-7.83,-155.3	0/0:-0,-16.86,-336	0/0:-0,-13.25,-264	0/0:-0,-14.45,-288	0/0:-0,-16.86,-336	0/0:-0,-10.84,-216	0/0:-0,-12.04,-240	0/0:-0,-13.85,-276	0/1:-31.8,-11.44,-188	0/0:-0,-12.64,-252	0/0:-0,-15.05,-300	0/0:-0,-9.03,-180	0/0:-0,-12.04,-240	0/0:-0,-13.25,-264	0/0:-0,-8.43,-168	0/0:-0,-16.86,-333.6	0/0:-0,-6.62,-132	0/0:-0,-9.63,-192	0/0:-0,-3.01,-58	0/0:-0,-6.62,-132	0/0:-0,-12.04,-238	0/0:-0,-6.62,-132	0/0:-0,-5.42,-108	0/0:-0,-12.64,-252	0/0:-0,-12.04,-240	0/0:-0,-18.66,-372	0/0:-0,-7.83,-156	0/0:-0,-9.63,-192	0/1:-70,-13.85,-204	0/0:-0,-15.05,-300	0/0:-0,-10.84,-216	0/0:-0,-10.84,-216	0/0:-0,-7.22,-144	0/0:-0,-7.22,-144	0/0:-0,-8.43,-168
chr7	97374174	C	<INS:ME:Bov-A2>	PASS	TSD=null;ASSESS=3;INTERNAL=null,null;SVTYPE=Bov-A2;SVLEN=261;MEINFO=Bov-A2,7,268,+;DIFF=0.96:n1-6,c54t,a92g,t138c,t142c,t173a,g219a,t229c,c244t,g247a,c255t,n265-269;LP=63;RP=73;RA=-0.213;PRIOR=false;SR=31	0/0:-0,-16.26,-322.8	0/0:-0,-6.02,-120	0/0:-0,-13.25,-264	0/1:-92,-8.43,-58.8	0/0:-0,-15.65,-311.6	0/1:-104.8,-11.44,-106.8	0/0:-0,-11.44,-228	0/0:-0,-15.05,-300	0/0:-0,-16.86,-336	0/0:-0,-10.24,-204	0/0:-0,-18.66,-370	0/1:-29.1,-7.83,-120	0/0:-0.6,-16.26,-312.6	0/0:-0,-14.45,-288	0/0:-0,-10.84,-216	0/0:-0,-4.82,-94	1/1:-144,-8.43,-0	0/0:-0,-4.82,-96	0/0:-0,-10.24,-204	0/1:-136,-13.25,-108	0/0:-0.22,-9.63,-184.4	0/0:-0,-8.43,-168	0/0:-0,-5.42,-108	0/1:-62,-7.22,-72	0/0:-0,-9.63,-192	0/1:-130,-12.64,-96	0/1:-124,-15.05,-155.4	0/0:-0,-15.05,-300	0/1:-240,-16.86,-57.6	0/0:-0,-14.45,-288	0/0:-0,-3.61,-72	0/1:-146.8,-16.86,-167	0/1:-134.8,-13.85,-119.5	0/0:-0,-7.83,-156	0/0:-0,-9.63,-192	0/0:-0,-6.62,-132	0/0:-0,-7.22,-144	0/0:-0,-10.84,-216
chr7	99066560	T	<INS:ME:Bov-A2>	PASS	TSD=null;ASSESS=4;INTERNAL=null,null;SVTYPE=Bov-A2;SVLEN=267;MEINFO=Bov-A2,1,268,-;DIFF=0.22:c9a,c17a,c22t,c30t,c48a,g55a,g58t,a68g,n129-269;LP=1;RP=2;RA=-1;PRIOR=false;SR=4	0/0:-0,-12.04,-238	0/0:-0,-6.62,-130	0/0:-0.43,-12.64,-244.2	0/0:-0,-10.24,-204	0/0:-0,-13.25,-263.5	0/0:-0,-9.03,-180	0/0:-0,-19.27,-380	0/0:-0.01,-12.04,-235.8	0/0:-0,-12.04,-240	0/0:-0,-7.83,-154.7	0/0:-0,-12.64,-250	0/0:-0,-7.83,-156	0/0:-1.52,-11.44,-193	0/0:-0,-11.44,-227.2	0/1:-18.4,-4.82,-70.61	0/0:-0,-6.62,-126.4	0/0:-0,-8.43,-166	0/0:-0.02,-8.43,-163.4	0/0:-0,-5.42,-105	0/0:-0,-10.24,-204	0/0:-0,-18.66,-372	0/0:-0,-6.02,-118.9	0/0:-0,-7.83,-156	0/0:-0,-10.84,-213.1	0/0:-0,-10.24,-204	0/0:-0,-12.04,-233.1	0/0:-0.03,-7.83,-146.7	0/0:-0.13,-15.65,-306.6	0/0:-0,-12.04,-238	0/0:-0.17,-11.44,-222.5	0/0:-0,-9.63,-186	0/0:-0,-10.84,-214	0/0:-0,-10.84,-216	0/0:-0,-6.62,-132	0/0:-1.2,-9.03,-157.2	0/0:-0,-10.84,-216	0/0:-0.6,-9.03,-165.3	0/0:-0,-9.03,-180
chr7	99504031	G	<INS:ME:Bov-A2>	PASS	TSD=dT;ASSESS=5;INTERNAL=null,null;SVTYPE=Bov-A2;SVLEN=266;MEINFO=Bov-A2,2,268,+;DIFF=0.96:n1,a10g,c17t,c54t,g56c,g88a,g110a,a124c,a131c,g156a,g198a,g201a,g202a,c205a,g208a,c218t,g238a,g241a,c249t,c255t,n261-269;LP=7;RP=14;RA=-1;PRIOR=false;SR=4	0/0:-0,-10.24,-204	0/0:-0.6,-6.62,-117.6	0/0:-0,-12.64,-249.6	0/0:-0,-8.43,-168	0/0:-0,-9.03,-180	0/0:-0,-7.83,-156	0/0:-0,-11.44,-228	0/0:-0,-6.62,-132	0/0:-0,-12.64,-252	0/0:-0,-6.62,-126	0/0:-0,-7.83,-156	0/0:-0,-9.03,-180	0/0:-0,-12.64,-251.1	0/0:-0,-6.62,-132	0/0:-0,-7.83,-156	0/0:-0,-4.21,-84	0/0:-0,-10.24,-204	0/0:-0,-7.83,-156	0/0:-0,-7.83,-153	0/0:-0,-7.83,-156	0/0:-0,-4.82,-96	0/0:-0,-8.43,-162	0/0:-0,-5.42,-108	0/0:-0,-7.83,-156	0/0:-0,-10.84,-216	0/1:-109.2,-11.44,-96.03	0/0:-0.6,-10.24,-191.7	0/0:-0,-11.44,-228	0/0:-0,-12.64,-252	0/0:-0,-10.84,-216	0/0:-0,-10.24,-202	0/0:-0,-8.43,-168	0/0:-0,-10.24,-203.8	0/0:-0,-9.63,-192	0/0:-0.6,-9.03,-168.6	0/0:-0,-9.63,-191.3	0/1:-116.5,-10.84,-72.17	0/0:-0,-8.43,-168
chr7	99912014	A	<INS:ME:Bov-A2>	PASS	TSD=null;ASSESS=3;INTERNAL=null,null;SVTYPE=Bov-A2;SVLEN=260;MEINFO=Bov-A2,8,268,-;DIFF=0.7:n1-7,c17a,n29,g55a,c79a,c101t,c111t,t138c,g139a,g198a,g231a,n239-269;LP=7;RP=11;RA=-0.652;PRIOR=false;SR=6	0/0:-0,-17.46,-348	0/0:-0,-7.22,-144	0/0:-0,-14.45,-288	0/0:-0,-10.24,-204	0/0:-0,-15.65,-312	0/0:-0,-16.86,-336	0/0:-0,-13.85,-274	0/0:-0,-10.24,-204	0/0:-0,-11.44,-228	0/1:-20,-4.82,-72	0/0:-0,-18.66,-372	0/0:-0,-8.43,-168	0/1:-56,-15.65,-249.6	0/0:-0,-16.86,-336	0/0:-0,-13.85,-273.6	0/0:-0,-6.02,-120	0/0:-0,-6.62,-132	0/0:-0,-4.82,-96	0/0:-0,-16.26,-322	0/0:-0,-6.62,-132	0/0:-0,-13.25,-264	0/0:-0,-5.42,-108	0/0:-0,-5.42,-108	0/0:-0,-9.63,-192	0/0:-0,-6.62,-132	0/0:-0,-7.22,-140.9	0/0:-1.2,-15.65,-287.3	0/0:-0,-8.43,-168	0/0:-0,-17.46,-344.5	0/0:-0,-9.03,-180	0/0:-0,-12.04,-240	0/0:-0,-12.64,-252	0/0:-1.81,-16.86,-301.81	0/0:-0,-11.44,-228	0/0:-0,-7.83,-156	0/0:-0.6,-6.02,-108.6	0/0:-0,-10.84,-214	0/0:-1.2,-9.03,-157.2
chr7	100406089	T	<INS:ME:Bov-A2>	PASS	TSD=AATACTT;ASSESS=5;INTERNAL=XR_003035725.1,PROMOTER;SVTYPE=Bov-A2;SVLEN=267;MEINFO=Bov-A2,1,268,-;DIFF=0.98:g55a,a91g,t138a,c140t,c218t,g241a,c255t,n265-269;LP=78;RP=58;RA=0.427;PRIOR=false;SR=15	0/0:-0,-17.46,-348	0/0:-0,-9.63,-192	0/0:-0,-13.25,-264	1/1:-171.3,-10.24,-0	0/0:-0,-17.46,-348	0/0:-0,-13.85,-276	0/0:-0,-13.85,-274	0/0:-0,-12.04,-240	0/0:-0,-18.06,-360	0/0:-0,-8.43,-168	0/0:-0,-16.26,-324	0/1:-195.9,-13.25,-32.4	0/0:-0.6,-16.26,-310.6	0/0:-0,-15.65,-312	0/0:-0,-12.64,-252	0/0:-0,-9.03,-180	1/1:-176.6,-10.84,-0.6	0/0:-0,-4.21,-84	0/0:-0.6,-16.26,-312.6	0/1:-110,-10.84,-96	0/0:-0.6,-16.26,-312.6	0/0:-0,-3.01,-60	0/1:-92,-6.62,-24	1/1:-162,-9.63,-0	0/1:-150,-13.25,-84	0/0:-0,-7.83,-156	0/0:-0,-21.07,-420	0/0:-0,-12.64,-252	0/1:-94,-14.45,-180	0/0:-0,-7.22,-144	0/1:-103.3,-12.64,-132	0/0:-0,-15.05,-300	0/0:-0,-13.85,-276	0/0:-0,-15.05,-300	0/0:-0,-3.61,-72	0/0:-0,-5.42,-108	1/1:-222.6,-13.85,-0.6	0/0:-0,-5.42,-108
chr7	100706193	T	<INS:ME:Bov-A2>	PASS	TSD=TCTCCTGGCAAT;ASSESS=5;INTERNAL=null,null;SVTYPE=Bov-A2;SVLEN=262;MEINFO=Bov-A2,6,268,-;DIFF=0.57:n1-5,c9a,c17a,g39t,c48t,c63t,i68ac,g73a,a75t,g76a,g83a,g88a,t90a,n95-146,g172a,t173c,g182t,g185a,c191t,g193t,g200a,c206t,n212-269;LP=17;RP=13;RA=0.387;PRIOR=false;SR=47	0/0:-0,-10.84,-215.7	0/0:-0,-6.62,-117.7	0/0:-0,-11.44,-223.6	0/0:-0,-4.82,-96	0/1:-63.2,-9.03,-101.7	0/1:-52.6,-10.24,-140.5	0/0:-0,-16.26,-321.5	0/0:-0,-13.85,-274	0/1:-85.7,-13.85,-179.3	0/1:-67.8,-7.22,-44.8	0/1:-63.9,-12.64,-177.3	0/0:-0,-9.63,-192	0/1:-163.7,-11.44,-30.78	0/0:-0.01,-15.05,-287.6	1/1:-157.6,-10.84,-0.65	0/0:-0,-6.62,-132	0/1:-96.9,-11.44,-117.2	0/0:-0,-9.03,-180	0/0:-0,-14.45,-286	0/0:-0,-5.42,-107.3	0/1:-56.6,-10.24,-143.3	0/0:-0,-4.82,-91.6	0/0:-0,-6.62,-132	0/0:-0,-4.82,-96	0/0:-0,-4.21,-82	0/0:-0,-11.44,-212	0/1:-49.62,-12.04,-155.97	0/0:-0,-13.25,-264	0/0:-0,-10.24,-196.7	0/0:-0,-12.04,-240	0/0:-0,-8.43,-163	0/1:-82.61,-10.84,-108.9	0/0:-0.6,-8.43,-149.8	0/0:-0,-13.25,-262	0/0:-0,-15.05,-300	0/1:-38.2,-6.62,-80.9	0/0:-0,-7.22,-138	0/1:-101.4,-7.83,-35.76
chr8	2031751	T	<INS:ME:Bov-A2>	PASS	TSD=null;ASSESS=4;INTERNAL=null,null;SVTYPE=Bov-A2;SVLEN=259;MEINFO=Bov-A2,10,269,+;DIFF=0.96:n1-10,c20t,c32t,g39a,g51a,n91,g98a,a149g,t155c,t210c,g211a,g231a,c240t,g251a,t259g,t260c,n269;LP=16;RP=19;RA=-0.248;PRIOR=false;SR=9	0/0:-0,-11.44,-226.2	0/0:-0,-11.44,-228	0/0:-0,-13.25,-263.5	0/0:-0,-7.83,-156	0/0:-0,-16.26,-324	0/0:-0,-10.24,-204	0/0:-0,-7.83,-156	0/0:-0,-8.43,-168	0/0:-0,-11.44,-228	0/0:-0,-12.04,-240	0/0:-0,-11.44,-228	0/1:-40,-9.63,-142	0/0:-0.6,-11.44,-216.6	0/0:-0,-8.43,-168	0/0:-0,-10.84,-216	0/0:-0,-8.43,-168	0/1:-82,-7.83,-60	0/1:-124,-9.63,-48	0/0:-0,-18.06,-360	0/0:-0,-7.83,-156	0/0:-0,-6.02,-120	0/0:-0,-7.22,-144	0/0:-0,-9.63,-192	0/0:-0,-11.44,-228	0/0:-0,-6.02,-120	0/1:-164,-12.64,-60	0/0:-0,-12.04,-240	0/0:-0,-9.63,-192	0/0:-0,-14.45,-286	0/0:-0,-7.22,-144	0/0:-0,-7.83,-156	0/0:-0,-18.66,-372	0/0:-0,-6.02,-120	0/0:-0,-9.03,-180	0/0:-0,-7.83,-156	0/0:-0,-5.42,-108	0/0:-0,-10.24,-204	0/0:-0,-9.03,-180
chr8	4856305	T	<INS:ME:Bov-A2>	PASS	TSD=dGTTG;ASSESS=5;INTERNAL=NM_001191298.1,INTRONIC;SVTYPE=Bov-A2;SVLEN=267;MEINFO=Bov-A2,1,268,+;DIFF=0.58:c9a,c17a,c19t,c47a,c54t,g55a,t90a,c97t,t171g,a187g,n195-269;LP=6;RP=7;RA=-0.222;PRIOR=false;SR=4	0/0:-0,-11.44,-227.6	0/0:-0.6,-13.85,-264.6	0/0:-0,-9.63,-190.7	0/0:-0,-6.02,-120	0/0:-0,-8.43,-164.4	0/0:-0.03,-12.64,-247.2	0/0:-0,-12.04,-237.5	0/0:-0,-9.63,-190	0/0:-0,-15.05,-300	0/0:-0,-6.62,-132	0/0:-0,-10.84,-214	0/0:-0,-9.03,-180	0/0:-0,-16.26,-314	0/0:-0,-15.05,-300	0/0:-0,-8.43,-166.1	0/0:-0,-4.82,-96	0/0:-0,-4.82,-96	0/0:-0,-8.43,-168	0/0:-0,-9.03,-180	0/0:-0.6,-13.25,-252.6	0/0:-0,-12.04,-240	0/0:-0,-4.21,-84	0/0:-0,-3.01,-60	0/0:-1.2,-7.22,-119.8	0/0:-0,-5.42,-108	0/0:-0,-14.45,-284.3	0/0:-0,-12.04,-238.3	0/0:-0,-9.03,-180	0/1:-29.5,-8.43,-130.1	0/0:-0,-16.86,-334	0/0:-0,-15.65,-310.5	0/0:-0,-12.04,-238.6	0/0:-0,-17.46,-341.8	0/0:-0,-9.63,-190	0/0:-0,-6.02,-120	0/0:-0,-4.21,-84	0/0:-0,-5.42,-106	0/0:-0,-6.02,-119.3
chr8	11770499	T	<INS:ME:Bov-A2>	PASS	TSD=ATATTTCCATT;ASSESS=5;INTERNAL=XR_003035960.1,INTRONIC;SVTYPE=Bov-A2;SVLEN=266;MEINFO=Bov-A2,2,268,-;DIFF=1:n1,a6c,t34g,c54t,a68g,a92g,g98a,c103t,c106t,c161t,a169g,g172a,g241a,c255t;LP=9;RP=9;RA=0;PRIOR=false;SR=5	0/0:-0,-13.85,-267.7	0/0:-0,-11.44,-228	0/0:-0,-10.84,-216	0/0:-0,-7.22,-144	0/0:-0.01,-15.05,-295.8	0/0:-0,-12.04,-240	0/0:-0,-7.83,-154	0/0:-0,-9.63,-183.2	0/0:-0,-13.85,-274	0/0:-0,-11.44,-228	0/0:-0,-10.84,-216	0/0:-0.1,-10.84,-208.7	0/0:-0,-10.24,-202	0/0:-0,-10.84,-216	0/0:-0,-11.44,-228	0/0:-0,-3.61,-72	0/0:-0,-8.43,-168	0/0:-0,-7.83,-156	0/0:-0,-16.86,-331.1	0/1:-94,-9.63,-84	0/0:-0,-12.04,-238.1	0/0:-0,-3.01,-60	0/0:-0,-5.42,-108	0/0:-0,-6.62,-132	0/0:-0,-10.24,-202	0/0:-0,-13.25,-262	0/0:-0,-12.04,-238	0/0:-0,-6.62,-132	0/0:-0,-12.04,-239.9	0/0:-0,-10.84,-216	0/0:-0,-7.22,-140	0/0:-0,-14.45,-286	0/0:-0,-8.43,-165.3	0/0:-0,-10.24,-202	0/0:-0,-4.21,-84	0/0:-0,-6.62,-132	0/1:-104,-9.03,-60	0/0:-0,-4.82,-96
chr8	12854021	T	<INS:ME:Bov-A2>	PASS	TSD=TT;ASSESS=5;INTERNAL=null,null;SVTYPE=Bov-A2;SVLEN=267;MEINFO=Bov-A2,1,268,-;DIFF=0.51:c9a,g14a,c17a,c18t,c30t,g55a,t67c,g73a,g84a,c87t,c97t,c103t,g108t,c111t,g112t,n126-138,g157a,c161t,t188c,g198t,g200c,a203g,t222c,g231a,g238c,n247-269;LP=17;RP=18;RA=-0.082;PRIOR=false;SR=62	0/1:-72,-10.24,-122.4	0/0:-0.6,-1.81,-24.6	0/1:-71,-16.86,-257.7	0/1:-36,-3.61,-36	0/1:-86.23,-12.04,-127.07	0/1:-109,-11.44,-99.57	0/1:-84,-12.04,-146.7	0/1:-90.41,-11.44,-121.5	0/1:-36.01,-11.44,-177.9	0/1:-40.2,-6.02,-72.13	0/1:-92.33,-9.03,-75.2	0/1:-64,-5.42,-36	0/1:-121.6,-15.65,-176	0/1:-68.17,-15.65,-226.5	0/1:-55,-9.03,-106.13	1/1:-34.6,-2.41,-0.6	0/1:-88.5,-8.43,-67.64	0/1:-106.3,-10.24,-88.1	0/1:-78.5,-9.63,-102	0/1:-98.2,-9.63,-70.8	0/1:-104.5,-11.44,-112.2	1/1:-52.6,-3.61,-0.6	0/1:-55.6,-6.02,-58	0/1:-32,-7.22,-108	0/1:-92.5,-7.22,-36.05	0/1:-87.5,-10.84,-120	0/0:-1.21,-10.24,-175.6	0/1:-46,-11.44,-160.4	0/1:-106,-13.25,-142	0/1:-54,-7.83,-84	0/1:-62.4,-13.85,-204	0/1:-135.8,-18.06,-196.9	0/1:-72,-10.24,-119.4	0/1:-46.3,-7.83,-95.8	0/1:-91.1,-11.44,-125.1	0/1:-82,-8.43,-77.7	1/1:-128.6,-8.43,-1.33	0/1:-86,-9.03,-78.53
chr8	13660542	G	<INS:ME:Bov-A2>	PASS	TSD=null;ASSESS=3;INTERNAL=null,null;SVTYPE=Bov-A2;SVLEN=267;MEINFO=Bov-A2,1,268,+;DIFF=0.91:c9a,c17a,c18t,c32a,g55a,d73,n74,g88t,t90a,c111t,t120a,n122-123,n127,t128a,n133-142,g147a,g150t,g172a,c175a,g178t,g185a,c190a,g193t,c197t,g198c,g199a,g200a,g212t,g216t,c217a,g219a,t220g,c221t,t222c,a223c,t224a,g225t,g228a,t229g,c230t,g231c,c232g,g241a,g247a,c255t,t260g,n268-269;LP=56;RP=69;RA=-0.301;PRIOR=…	0/1:-109.71,-15.65,-158.02	0/1:-30,-6.62,-84	0/1:-82.3,-13.85,-168.15	0/1:-54,-5.42,-46	0/1:-92,-10.24,-87	0/1:-30,-8.43,-124.6	0/1:-40,-6.02,-67.7	0/1:-24.3,-12.04,-197.2	0/1:-30,-9.63,-154	0/0:-1.2,-7.83,-117.2	0/1:-68.5,-11.44,-120.17	0/1:-47.3,-6.62,-60	0/1:-70,-10.84,-114	0/1:-88.7,-14.45,-171.3	0/0:-0.73,-7.22,-115.2	0/0:-0.6,-8.43,-140.6	0/1:-42,-4.21,-36	0/1:-38.4,-4.21,-36	0/1:-84,-12.64,-146.3	0/1:-50.7,-7.83,-92	0/1:-36.3,-12.04,-190.9	0/0:-0,-3.01,-58	0/1:-42,-3.61,-22	0/1:-49.9,-10.84,-142	0/1:-25.3,-6.02,-75.12	0/0:-1.21,-10.84,-172.2	0/1:-75.83,-7.83,-52.6	0/0:-1.2,-9.03,-155.2	0/1:-92,-13.25,-150	0/1:-62,-10.24,-120	0/1:-52,-12.04,-151.4	0/1:-121.8,-15.05,-132.88	0/1:-50,-10.24,-138.4	0/1:-52,-5.42,-44	0/1:-116,-11.44,-84	0/1:-30,-3.61,-32	0/1:-68.4,-9.63,-100	0/1:-104,-9.03,-58
chr8	20736435	T	<INS:ME:Bov-A2>	PASS	TSD=null;ASSESS=4;INTERNAL=null,null;SVTYPE=Bov-A2;SVLEN=267;MEINFO=Bov-A2,1,268,-;DIFF=0.74:c32t,c54t,g88a,t90a,c103t,g108a,g151t,c165t,g172a,g198t,g200c,g231t,n233,a245g,n249,c255t,a257c,n266,n269;LP=3;RP=4;RA=-0.415;PRIOR=false;SR=5	0/0:-0.6,-12.64,-236.6	0/0:-0,-11.44,-224.4	0/0:-0,-8.43,-159.6	0/0:-0.07,-1.2,-15.5	0/0:-0,-1.2,-19.5	0/0:-0,-13.85,-273.5	0/0:-1.2,-9.03,-153.5	0/0:-0,-9.03,-179.5	0/0:-0,-3.01,-49.2	0/0:-0,-9.03,-174.7	0/0:-0,-16.86,-336	0/0:-0,-6.02,-118.6	1/1:-64.2,-4.82,-1.29	0/0:-0,-10.84,-216	0/0:-0,-3.61,-67.4	0/0:-0,-2.41,-48	0/0:-0.1,-6.62,-124.2	0/0:-0,-4.21,-81.9	0/0:-0,-15.05,-300	0/0:-0,-8.43,-168	0/0:-0.6,-2.41,-34.5	0/0:-0,-6.02,-120	0/0:-0.6,-3.61,-60.6	0/0:-0.6,-3.01,-46.1	0/0:-0,-2.41,-48	0/0:-0,-6.62,-130.8	0/0:-0,-4.82,-85.3	0/0:-0.06,-3.61,-63	0/0:-0.6,-1.81,-20.9	0/0:-0,-8.43,-168	0/0:-1.29,-1.81,-16.7	0/0:-0.6,-3.01,-48.6	0/1:-43.6,-8.43,-120	0/0:-0,-6.02,-120	0/0:-0.9,-3.01,-38.8	0/0:-0.6,-4.82,-84.6	0/0:-0,-5.42,-106.7	0/0:-0,-10.84,-216
chr8	22256443	C	<INS:ME:Bov-A2>	PASS	TSD=AAATACAATAAATAAC;ASSESS=5;INTERNAL=null,null;SVTYPE=Bov-A2;SVLEN=267;MEINFO=Bov-A2,1,268,-;DIFF=0.3:c17t,c30t,c54t,g73a,n91-112,a118g,t142c,g182t,g198a,g211a,n218-269;LP=4;RP=2;RA=1;PRIOR=false;SR=10	0/1:-36,-13.25,-228	0/1:-108,-14.45,-174.6	0/1:-105.2,-17.46,-240	0/0:-0,-4.21,-84	0/0:-0,-13.85,-274.6	0/1:-94,-16.86,-238	0/0:-0,-9.03,-180	0/1:-60,-10.24,-144	0/0:-1.2,-18.06,-336	0/1:-108,-9.63,-80.6	0/1:-36,-10.24,-167.3	0/1:-36,-10.84,-180	0/0:-1.2,-18.66,-343.3	0/1:-120,-21.07,-300	0/1:-94.9,-13.25,-166.8	0/1:-84,-10.24,-120	0/0:-0,-9.03,-180	0/0:-1.2,-7.83,-133.2	0/1:-83,-21.07,-333	0/0:-0,-7.22,-144	0/0:-0.07,-12.64,-246.8	0/1:-36,-4.82,-60	0/0:-0,-9.63,-192	0/0:-0,-9.63,-187.2	0/0:-0.6,-6.02,-106.6	0/0:-0.6,-11.44,-216.6	0/0:-1.2,-13.25,-239.2	0/1:-47.9,-11.44,-180	0/1:-120,-17.46,-225.8	0/0:-0.6,-12.64,-235.7	0/0:-0,-9.63,-192	0/1:-48,-13.25,-216	0/0:-1.2,-12.64,-228.2	0/0:-1.2,-13.25,-241.2	0/0:-1.2,-7.22,-121.2	0/0:-0,-8.43,-168	0/0:-0,-4.82,-96	0/0:-1.2,-10.24,-181.2
chr8	28646669	T	<INS:ME:Bov-A2>	PASS	TSD=null;ASSESS=4;INTERNAL=XM_024996078.1,INTRONIC;SVTYPE=Bov-A2;SVLEN=267;MEINFO=Bov-A2,1,268,-;DIFF=0.32:c9a,c17a,g55a,g59a,n65-105,n113,n116,n119,t122c,t129c,g172a,c179a,g185a,c189t,g193t,c197t,n210,g241a;LP=3;RP=5;RA=-0.737;PRIOR=false;SR=6	0/0:-2.11,-15.05,-256.51	0/0:-0.6,-3.01,-42.6	0/1:-72.3,-9.63,-112.8	0/0:-0,-1.81,-36	0/0:-0,-12.04,-238.8	0/0:-0,-6.62,-132	0/0:-0.6,-5.42,-94.4	0/0:-0,-12.64,-251.5	0/0:-0,-16.26,-324	0/0:-0.6,-4.21,-72.5	0/0:-0,-14.45,-288	0/0:-0,-12.04,-240	0/0:-0.6,-12.04,-228.6	0/0:-0.6,-3.61,-58.6	0/0:-0,-9.63,-192	0/0:-0,-4.82,-96	0/0:-0,-10.84,-216	0/0:-0,-5.42,-108	0/0:-1.2,-15.65,-287.2	0/0:-1.2,-7.22,-121.2	0/0:-0.6,-6.02,-106.6	0/0:-0,-3.61,-72	0/0:-0,-4.21,-84	0/1:-45.01,-7.83,-103.8	1/1:-36.6,-2.41,-0.6	0/0:-0,-6.02,-118	0/1:-36,-6.62,-93.2	0/1:-33.32,-10.84,-174.8	0/0:-0.01,-12.64,-245.9	0/0:-0.6,-11.44,-214.9	0/0:-0,-7.22,-144	0/0:-1.2,-11.44,-205.2	0/0:-0.6,-6.02,-108.6	0/0:-0,-10.24,-204	0/0:-0,-2.41,-48	0/0:-0,-6.62,-132	0/0:-0,-7.83,-153.5	0/1:-48,-4.82,-48
chr8	33821806	T	<INS:ME:Bov-A2>	PASS	TSD=null;ASSESS=3;INTERNAL=null,null;SVTYPE=Bov-A2;SVLEN=266;MEINFO=Bov-A2,2,268,+;DIFF=0.36:n1,c9a,g51t,g55a,c71t,g73a,c79t,g83c,g84t,c87a,t90a,g99a,n112-269;LP=5;RP=1;RA=2.322;PRIOR=false;SR=4	0/0:-0,-15.65,-312	0/0:-0,-12.64,-252	0/0:-0,-7.22,-141.7	0/0:-0,-9.03,-180	0/0:-0,-12.04,-240	0/0:-0,-14.45,-288	0/0:-1.2,-11.44,-205.2	0/0:-0.6,-9.03,-168.6	0/0:-0,-10.84,-216	0/0:-0,-7.83,-154.9	0/0:-0,-15.05,-298	0/1:-48,-6.02,-71.9	0/0:-0,-10.24,-202	0/0:-0,-11.44,-228	0/0:-0,-9.03,-179.8	0/0:-0,-4.82,-94	0/0:-0,-6.02,-118	0/0:-0,-10.24,-204	0/0:-0,-15.65,-312	0/1:-24,-6.62,-108	0/0:-0,-8.43,-168	0/0:-0,-7.22,-144	0/0:-0,-6.62,-132	0/1:-60,-12.64,-190.7	0/0:-0,-12.64,-252	0/0:-0,-12.04,-240	0/0:-0,-7.22,-142	0/0:-0,-9.63,-188	0/0:-1.2,-12.64,-229.1	0/0:-0,-7.83,-156	0/0:-0.6,-9.63,-178.5	0/0:-0,-13.25,-264	0/0:-0,-10.24,-204	0/0:-0,-10.24,-204	0/0:-0,-7.83,-156	0/0:-0.6,-3.01,-48.6	0/0:-0,-6.62,-132	0/0:-0,-7.83,-156
chr8	52945677	T	<INS:ME:Bov-A2>	PASS	TSD=dTGTG;ASSESS=5;INTERNAL=XM_005210045.4,INTRONIC;SVTYPE=Bov-A2;SVLEN=261;MEINFO=Bov-A2,7,268,+;DIFF=0.5:n1-6,c87t,t90g,a118c,c123t,n142-269;LP=73;RP=69;RA=0.081;PRIOR=false;SR=91	0/1:-66,-11.44,-150	0/1:-46,-13.85,-208	0/0:-0,-15.05,-300	0/0:-0,-14.45,-288	0/0:-0.03,-12.04,-233.2	0/1:-122,-15.65,-178	0/1:-126,-18.66,-232	0/0:-1.2,-9.03,-157.2	0/1:-56,-10.24,-142	0/0:-0,-7.22,-144	0/0:-0,-13.85,-276	0/0:-0,-6.62,-132	0/0:-0,-13.85,-276	0/1:-114,-13.25,-140	0/1:-124,-10.24,-66	0/0:-1.2,-7.83,-113.2	0/0:-0,-8.43,-168	0/1:-76,-10.24,-114	0/1:-101.8,-15.65,-198	0/1:-116,-13.85,-148	0/0:-0,-13.25,-264	0/1:-46,-10.24,-132	0/0:-0,-13.25,-264	0/0:-0,-8.43,-168	0/0:-0,-10.84,-216	0/1:-54,-10.84,-150	0/1:-66,-9.03,-108	0/0:-0.13,-6.62,-126.6	0/0:-0.13,-15.05,-294.6	0/0:-0,-16.26,-324	0/0:-0,-10.84,-216	0/0:-0,-11.44,-226.7	0/0:-0,-9.63,-192	0/1:-78.01,-11.44,-135.8	0/1:-76,-18.06,-268.8	0/0:-0,-11.44,-228	0/0:-0,-9.63,-192	0/1:-54,-8.43,-106
chr8	62242263	T	<INS:ME:Bov-A2>	PASS	TSD=null;ASSESS=3;INTERNAL=null,null;SVTYPE=Bov-A2;SVLEN=267;MEINFO=Bov-A2,1,268,+;DIFF=0.62:a5c,n21,n25,n44,c47t,g58a,a91c,g104a,a109g,t121g,c197t,g200c,t229c,n269;LP=1;RP=8;RA=-3;PRIOR=false;SR=9	0/0:-0,-10.24,-204	0/0:-0,-8.43,-164.4	0/0:-0,-13.25,-261.5	0/0:-0,-15.05,-296	0/1:-24,-6.62,-104.9	0/0:-0,-12.64,-249	0/0:-0,-12.04,-239.7	0/0:-0,-10.84,-215.8	0/0:-0,-14.45,-285	0/0:-0,-10.24,-198	0/0:-0,-13.85,-274	0/0:-0,-7.22,-136.4	0/0:-0,-13.85,-271	0/0:-0,-8.43,-168	0/0:-0,-6.62,-128.3	0/0:-0,-10.84,-214	0/0:-0.6,-6.62,-118.6	0/0:-0,-9.03,-179.7	0/0:-0,-12.04,-239.4	0/0:-0,-6.62,-129.2	0/0:-0,-9.03,-180	0/0:-0,-5.42,-106	0/0:-1.21,-10.24,-171.8	0/0:-0,-6.62,-130	0/0:-0,-5.42,-106.5	0/0:-0,-10.84,-209.4	0/0:-0,-11.44,-228	0/0:-0,-10.84,-212	0/0:-0,-6.02,-116.2	0/0:-0,-8.43,-165.4	0/1:-45.3,-6.62,-77.4	0/0:-0,-15.65,-310.7	0/0:-0,-16.26,-320.1	0/0:-0,-8.43,-166.5	0/0:-0,-11.44,-228	0/0:-0.6,-6.62,-119.2	0/0:-0.6,-11.44,-213	0/0:-0,-6.62,-131.1
chr8	66278748	T	<INS:ME:Bov-A2>	PASS	TSD=GAGTT;ASSESS=5;INTERNAL=XR_003036173.1,TERMINATOR;SVTYPE=Bov-A2;SVLEN=267;MEINFO=Bov-A2,1,268,+;DIFF=1:a49g,g88a,a91g,c97t,c103t,g108c,c111t,a186t,c197t,g200c,g201a,g213c,g219a;LP=27;RP=31;RA=-0.199;PRIOR=false;SR=6	0/0:-0,-17.46,-348	0/0:-0,-7.83,-156	0/0:-0,-15.05,-297.4	0/1:-99.2,-10.84,-94	0/1:-128.7,-13.25,-108.01	0/0:-0,-15.05,-300	0/0:-0,-10.24,-204	0/0:-0,-7.83,-155.9	0/0:-0,-13.25,-262.2	0/0:-0,-9.03,-178	0/0:-0,-10.84,-216	0/0:-0,-7.22,-140	0/0:-0,-15.65,-299.9	0/0:-0,-9.03,-180	0/0:-0,-8.43,-164.6	0/0:-0,-6.62,-132	1/1:-217.01,-14.45,-1.81	0/0:-0,-11.44,-228	0/0:-0,-15.05,-293.5	0/0:-0,-9.03,-180	0/0:-0,-15.65,-308.2	0/0:-0,-10.84,-216	0/0:-0,-14.45,-288	0/0:-0,-11.44,-228	0/0:-0,-9.03,-176.4	0/0:-0.43,-11.44,-218.2	0/0:-0,-13.25,-264	0/0:-0,-11.44,-227.3	0/0:-0,-10.84,-215.2	0/0:-0,-8.43,-168	0/0:-0.6,-10.24,-192.6	0/0:-0,-12.64,-250	0/0:-0,-18.06,-360	0/0:-0,-15.05,-300	0/0:-0,-15.65,-312	0/1:-53.8,-6.62,-58.13	0/0:-0,-9.03,-180	0/0:-0,-7.22,-144
chr8	66697314	A	<INS:ME:Bov-A2>	PASS	TSD=AGAGTA;ASSESS=5;INTERNAL=null,null;SVTYPE=Bov-A2;SVLEN=262;MEINFO=Bov-A2,6,268,-;DIFF=0.78:n1-5,c25t,a26g,n30,c32t,g55a,t67a,g69a,t81a,a91g,a94g,g104a,g110a,c111g,n125-127,g231a,c234t,c240t,g256a;LP=6;RP=16;RA=-1.415;PRIOR=false;SR=14	0/0:-0,-14.45,-288	0/0:-0,-9.03,-178.7	0/0:-0,-15.05,-300	0/0:-0,-12.04,-240	0/1:-44,-8.43,-120	0/0:-0,-15.05,-300	0/1:-32.02,-11.44,-183.3	0/1:-124,-9.63,-46.9	0/0:-0,-13.85,-276	0/0:-0,-8.43,-168	0/0:-0,-14.45,-287.5	0/0:-0,-8.43,-168	0/0:-0,-13.25,-258.7	0/0:-0.6,-7.22,-128.6	0/0:-0,-7.22,-144	0/1:-20,-4.21,-60	0/0:-0,-7.83,-156	0/0:-0,-7.22,-144	0/1:-111.6,-12.64,-130	0/0:-0.6,-4.21,-72.6	0/0:-1.2,-15.65,-287.2	0/0:-0,-6.62,-130	0/0:-0,-9.03,-180	0/1:-44,-6.62,-82	0/0:-0,-9.63,-191.1	0/0:-0,-5.42,-106	0/0:-0,-9.03,-180	0/0:-0,-12.04,-240	0/1:-62,-7.83,-73.9	0/1:-80,-9.63,-106	0/0:-0,-14.45,-287.5	0/1:-46,-10.24,-156	0/1:-66,-10.84,-144	0/0:-0,-10.84,-216	0/0:-0,-8.43,-168	0/1:-44,-4.82,-47.7	0/0:-0,-15.05,-300	0/0:-0.6,-6.02,-104.4
chr8	85106087	T	<INS:ME:Bov-A2>	PASS	TSD=TGCT;ASSESS=5;INTERNAL=null,null;SVTYPE=Bov-A2;SVLEN=267;MEINFO=Bov-A2,1,268,+;DIFF=0.92:a53g,g55a,a68g,g73a,t222a,t224a,c230a,c240a,n257-258,n260,n266-269;LP=14;RP=8;RA=0.807;PRIOR=false;SR=5	0/0:-0.6,-9.03,-155.7	0/1:-42,-15.65,-222.7	0/0:-0.15,-13.25,-230.6	0/0:-1.28,-7.83,-119.6	0/0:-0,-10.84,-207.2	0/0:-1.23,-12.04,-189.6	0/0:-0,-8.43,-157.2	0/0:-0,-11.44,-218.3	0/0:-0,-12.64,-239.5	0/0:-0.04,-6.62,-111	0/0:-0.83,-11.44,-188.2	0/0:-0.17,-5.42,-98.5	0/0:-0,-15.65,-301	0/0:-0,-14.45,-272.7	0/0:-0,-9.03,-155.7	0/0:-0,-7.83,-129.8	0/0:-0.77,-11.44,-185.6	0/0:-0,-10.84,-203.6	0/0:-0.03,-17.46,-321.6	0/0:-0.86,-8.43,-130.2	0/0:-1.31,-12.04,-165.5	0/0:-0,-3.01,-51	0/0:-0.3,-5.42,-97.7	0/0:-0,-6.02,-117	0/0:-0.63,-9.03,-145.1	0/0:-0.02,-9.63,-147.1	0/0:-0.75,-8.43,-132.5	0/0:-0.01,-8.43,-145.8	0/0:-0.6,-10.24,-175.7	0/0:-1.21,-12.04,-184.1	0/0:-0,-9.63,-178.9	0/0:-0,-17.46,-323.3	0/0:-1.2,-16.26,-284.4	0/0:-0,-7.83,-136	0/0:-0.13,-12.04,-218.8	0/0:-0.02,-6.02,-108.3	0/0:-0.05,-12.04,-217.5	0/0:-0,-7.22,-140.1
chr8	87727524	T	<INS:ME:Bov-A2>	PASS	TSD=null;ASSESS=4;INTERNAL=null,null;SVTYPE=Bov-A2;SVLEN=267;MEINFO=Bov-A2,1,268,-;DIFF=0:n5,a10g,g35a,a49g,n57-269;LP=3;RP=1;RA=1.585;PRIOR=false;SR=8	0/1:-84,-11.44,-144	0/1:-82.8,-10.24,-120	0/0:-0,-10.84,-216	0/1:-60,-5.42,-46	0/0:-0,-3.01,-60	0/0:-0,-12.64,-251	0/0:-0,-12.64,-248.6	0/1:-48,-15.05,-250	0/0:-0,-20.47,-408	0/1:-48,-6.62,-84	0/1:-46,-13.85,-228	0/1:-34.8,-9.03,-144	0/1:-60,-11.44,-166	0/0:-0,-12.04,-237.6	0/0:-0,-10.84,-216	0/1:-58,-7.22,-84	0/0:-0,-9.03,-180	0/1:-36,-5.42,-72	0/1:-72,-16.86,-262.4	0/0:-1.2,-7.83,-133.2	0/1:-84,-14.45,-204	0/1:-24,-5.42,-84	0/0:-0,-6.62,-132	0/0:-0,-10.24,-204	0/1:-48,-6.02,-72	0/1:-120,-19.87,-276	0/1:-48,-10.24,-156	0/0:-0,-10.84,-216	0/1:-84,-13.85,-190	0/1:-108,-13.85,-168	0/1:-128,-14.45,-156	0/1:-72,-13.25,-192	0/1:-48,-12.64,-201.3	0/0:-1.2,-10.24,-181.2	0/1:-36,-6.02,-84	0/0:-0,-4.82,-96	0/1:-84,-12.64,-168	0/0:-1.2,-10.84,-193.2
chr8	102934833	G	<INS:ME:Bov-A2>	PASS	TSD=G;ASSESS=5;INTERNAL=XR_003036125.1,TERMINATOR;SVTYPE=Bov-A2;SVLEN=267;MEINFO=Bov-A2,1,268,-;DIFF=1:t45c,c54t,g56a,c79t,g85a,a91g,a94g,g112a,t134c,a148c,g198a,c218t,c246a,c255t,t259g,t260c;LP=5;RP=5;RA=0;PRIOR=false;SR=4	0/0:-0,-13.85,-275.1	0/0:-0,-11.44,-228	0/0:-0,-7.83,-156	0/0:-0,-13.85,-276	0/0:-0,-9.03,-180	0/0:-0,-12.64,-252	0/0:-0,-12.64,-252	0/0:-0,-10.84,-216	0/0:-0,-13.85,-276	0/0:-0,-8.43,-164.4	0/0:-0,-12.04,-240	0/0:-0,-7.83,-156	0/0:-0,-18.66,-370.6	0/0:-0,-6.02,-120	0/0:-0,-8.43,-168	0/0:-0,-7.22,-144	0/1:-135.8,-12.64,-96	0/0:-0,-10.24,-204	0/0:-0,-13.85,-276	0/0:-0,-10.24,-204	0/0:-0,-12.04,-240	0/0:-0,-7.83,-156	0/0:-0,-19.27,-384	0/0:-0,-6.02,-120	0/0:-0,-13.25,-264	0/0:-0.6,-12.04,-228.6	0/0:-0,-16.26,-324	0/0:-0,-7.83,-155.3	0/0:-0,-16.86,-336	0/0:-0,-7.83,-156	0/0:-0,-13.25,-264	0/0:-0,-14.45,-288	0/0:-0,-8.43,-168	0/0:-0,-7.22,-144	0/0:-0,-14.45,-288	0/0:-0,-7.22,-144	0/0:-0,-12.64,-252	0/0:-0,-11.44,-228
chr8	105863962	A	<INS:ME:Bov-A2>	PASS	TSD=AAGCAAA;ASSESS=5;INTERNAL=XM_024996355.1,INTRONIC;SVTYPE=Bov-A2;SVLEN=267;MEINFO=Bov-A2,1,268,+;DIFF=0.69:c19t,c54t,g56a,t67a,c78t,c87t,c119a,n235-269;LP=1;RP=7;RA=-2.807;PRIOR=false;SR=4	0/0:-0,-13.85,-276	0/0:-0.6,-15.65,-297.2	0/0:-0,-12.64,-250.6	0/0:-0,-6.02,-120	0/0:-0,-9.63,-192	0/0:-0.6,-18.66,-357.8	0/0:-0,-16.86,-331	0/0:-0,-16.86,-336	0/0:-0,-15.65,-312	0/0:-0,-7.22,-138	0/0:-0,-16.26,-322	0/1:-48,-10.84,-168	0/0:-0,-15.65,-303	0/0:-0.6,-15.65,-300.6	0/0:-0,-8.43,-166	0/0:-0,-6.62,-132	0/0:-0,-7.83,-152.8	0/0:-0.6,-10.84,-204.6	0/0:-0,-12.64,-252	0/0:-0,-11.44,-228	0/0:-0,-10.84,-214.8	0/0:-0,-3.61,-72	0/0:-0,-7.22,-144	0/0:-0.6,-10.24,-190.7	0/0:-0,-10.24,-204	0/0:-0.6,-15.05,-285.2	0/0:-0,-13.25,-262	0/0:-0,-11.44,-227.8	0/0:-0,-9.63,-192	0/0:-0,-6.62,-131.2	0/0:-0,-7.83,-156	0/0:-0,-11.44,-225.8	0/0:-0,-12.64,-252	0/0:-0.6,-10.24,-192.6	0/0:-0,-19.87,-396	0/0:-0.6,-10.24,-192.6	0/0:-1.2,-7.83,-130.2	0/0:-0.6,-10.84,-204.6
chr8	109212359	T	<INS:ME:Bov-A2>	PASS	TSD=TCATTTCACCCT;ASSESS=5;INTERNAL=null,null;SVTYPE=Bov-A2;SVLEN=267;MEINFO=Bov-A2,1,268,+;DIFF=1:a42g,a91g,g98a,c103t,a113c,a148g,a187g,c197a,g202c,g219a,a223c;LP=49;RP=44;RA=0.155;PRIOR=false;SR=28	0/0:-0,-10.84,-216	0/0:-0,-8.43,-168	0/0:-0,-13.85,-276	0/0:-0,-4.21,-84	0/1:-116,-9.03,-48	0/0:-0,-12.04,-239.5	0/0:-0,-15.65,-312	0/0:-0,-8.43,-164.5	0/0:-0,-11.44,-228	0/0:-0,-10.24,-204	0/0:-0,-10.24,-200.4	1/1:-100.6,-6.62,-0.6	0/0:-0,-11.44,-228	0/0:-0,-13.25,-262	0/0:-0,-8.43,-168	0/0:-0,-5.42,-108	0/1:-82,-7.22,-48	0/0:-0,-9.03,-180	0/0:-0,-16.86,-329.7	0/1:-123.7,-10.24,-60	0/0:-0,-9.63,-192	0/0:-0,-5.42,-108	0/0:-0,-5.42,-108	0/1:-82.4,-9.63,-82.2	0/1:-69.7,-6.02,-36	0/0:-0,-14.45,-288	0/0:-0,-12.64,-252	0/0:-0,-11.44,-228	0/0:-0,-13.25,-264	0/0:-0,-9.63,-189.6	0/1:-164.1,-18.66,-180	0/0:-0,-10.84,-216	0/0:-0,-10.24,-204	0/0:-0,-9.03,-174.4	0/0:-0,-4.21,-84	0/1:-106,-9.03,-57.6	0/1:-144,-12.64,-84	0/0:-0,-7.22,-144
chr8	112283046	A	<INS:ME:Bov-A2>	PASS	TSD=null;ASSESS=4;INTERNAL=XM_024996031.1,INTRONIC;SVTYPE=Bov-A2;SVLEN=267;MEINFO=Bov-A2,1,268,-;DIFF=0.48:c17a,g55a,a94g,c103t,c111t,t116a,t120a,t126a,t128a,n137,n139-142,n160-161,n164,n166-167,t171a,t173a,c175a,t176a,n182-183,c189a,n190-191,g195a,n197-199,g200t,n201-202,c205a,c206a,n207,n209,n214-269;LP=4;RP=9;RA=-1.17;PRIOR=false;SR=12	0/1:-62.2,-5.42,-34.99	1/1:-47.7,-3.01,-0.6	0/0:-0,-7.83,-154	0/0:-0,-1.81,-30.3	0/0:-0,-14.45,-278.3	0/0:-0,-12.04,-233	0/1:-55.9,-4.82,-31.7	0/1:-63.7,-4.82,-17.11	0/1:-52.9,-7.83,-93.2	0/1:-70.7,-4.82,-20	0/0:-0.6,-9.63,-175.2	0/1:-36,-4.21,-41.6	0/0:-0.7,-4.21,-61.7	0/0:-0,-11.44,-223	0/0:-0.6,-4.82,-73.5	0/1:-24,-3.61,-42	0/0:-0,-6.02,-120	0/0:-0,-4.82,-92	0/1:-36.05,-4.21,-43	0/0:-0,-9.03,-174.6	0/0:-0,-7.22,-142.6	0/0:-0,-2.41,-43	0/0:-0,-7.22,-138.1	0/1:-36,-3.01,-24	1/1:-24.6,-1.81,-0.6	0/0:-0.6,-7.83,-141.5	1/1:-71,-4.21,-0.6	0/0:-0.6,-3.61,-53	0/1:-34.23,-7.83,-103.8	0/0:-0.6,-9.63,-180.6	0/0:-0.6,-6.02,-99.8	0/0:-0.6,-7.83,-134.3	0/1:-57.9,-5.42,-48	0/1:-34,-6.02,-84	0/1:-54.97,-5.42,-36.8	0/0:-0.65,-12.64,-227.2	0/1:-78.3,-6.62,-44.7	0/0:-0.68,-8.43,-143.3
chr9	459444	A	<INS:ME:Bov-A2>	PASS	TSD=AAA;ASSESS=5;INTERNAL=NM_001206124.2,TERMINATOR;SVTYPE=Bov-A2;SVLEN=250;MEINFO=Bov-A2,18,268,+;DIFF=0.56:n1-17,c37t,g55a,g73t,t90g,g98a,n169,n173,n197,g213a,g219a,g231t;LP=2;RP=8;RA=-2;PRIOR=false;SR=11	0/0:-0,-16.86,-334.5	0/0:-0,-9.03,-180	0/0:-0,-12.04,-238.8	0/0:-0,-9.63,-192	0/0:-0.6,-10.24,-192.6	0/0:-0,-8.43,-166.3	0/0:-1.2,-13.25,-238.5	0/0:-0,-9.03,-180	0/0:-0,-13.25,-264	0/0:-0,-9.03,-180	0/1:-72,-15.65,-239.6	0/0:-0,-10.24,-204	0/0:-0,-12.64,-247	0/0:-1.2,-15.05,-276.9	0/0:-0,-11.44,-228	0/0:-0,-7.83,-156	0/0:-0,-4.21,-84	0/0:-0,-13.85,-276	0/0:-0.01,-14.45,-283.8	0/0:-0.6,-6.62,-120.6	0/0:-0,-10.24,-204	0/0:-0,-2.41,-48	0/0:-0,-2.41,-48	0/0:-0,-12.64,-251.8	0/1:-36,-4.82,-60	0/0:-0,-8.43,-168	0/0:-0,-12.64,-252	0/0:-0,-9.63,-192	0/0:-0.01,-14.45,-283.7	0/0:-0,-10.24,-204	0/0:-0,-10.84,-216	0/0:-0,-13.85,-276	0/0:-0,-12.64,-250.5	0/0:-0,-7.83,-156	0/0:-0,-10.24,-204	0/0:-0,-9.63,-192	0/0:-0,-10.24,-204	0/0:-0.6,-9.03,-168.6
chr9	12642078	A	<INS:ME:Bov-A2>	PASS	TSD=dTTTGTGTTTT;ASSESS=5;INTERNAL=XM_024996915.1,INTRONIC;SVTYPE=Bov-A2;SVLEN=267;MEINFO=Bov-A2,1,268,-;DIFF=0.9:a49g,d54,n55,a68g,g88t,t90g,g98a,c158t,g170a,g198a,c255t,n268-269;LP=7;RP=10;RA=-0.515;PRIOR=false;SR=15	0/1:-68.33,-13.85,-191.1	0/0:-1.24,-15.05,-245	0/0:-1.22,-7.83,-122.8	0/0:-0.15,-12.04,-221.8	0/0:-1.2,-9.63,-156.5	0/0:-0,-13.25,-264	0/0:-0,-9.63,-192	0/0:-0,-6.62,-126	0/1:-36,-13.25,-218	0/0:-0.6,-8.43,-138	0/1:-43.68,-10.24,-124.4	0/1:-36,-3.61,-34	0/0:-0,-9.03,-172	0/0:-1.23,-10.24,-161.5	0/0:-1.21,-9.03,-141.1	0/0:-0.6,-7.83,-132.9	0/0:-0,-6.62,-120.9	0/1:-72.03,-10.24,-113.2	0/1:-36.13,-9.63,-148.6	0/1:-58.13,-7.83,-76.9	0/0:-0.61,-6.02,-89.7	0/0:-0,-10.24,-194.9	0/1:-48.13,-11.44,-158.6	0/1:-32.7,-11.44,-160.2	0/0:-0,-8.43,-162.9	0/0:-0.6,-14.45,-256.5	0/1:-58.2,-13.85,-201.1	0/0:-0,-9.03,-180	0/0:-0.6,-7.83,-133.3	0/1:-60.21,-10.84,-134.2	0/0:-0.6,-13.25,-230.3	0/0:-0.61,-13.85,-249.9	0/1:-36,-7.83,-110.8	0/0:-0,-9.03,-173	0/0:-0,-16.26,-322	0/0:-0.03,-9.63,-172.7	0/1:-72,-11.44,-144.5	0/1:-96,-14.45,-178.3
chr9	13934294	A	<INS:ME:Bov-A2>	PASS	TSD=null;ASSESS=4;INTERNAL=null,null;SVTYPE=Bov-A2;SVLEN=267;MEINFO=Bov-A2,1,268,+;DIFF=1:c54t,i60a,a68g,c87t,a91g,a94g,g98a,g104c,c114t,g219a,c230t,c240t,c255t;LP=14;RP=17;RA=-0.28;PRIOR=false;SR=4	0/0:-0,-14.45,-287.8	0/0:-0,-7.22,-144	0/0:-0,-19.87,-392	0/0:-0,-6.02,-120	0/1:-63.1,-15.05,-228	0/0:-0,-12.04,-239.8	0/0:-0.6,-13.25,-250.6	0/0:-0,-9.63,-192	0/0:-0,-14.45,-283.6	0/0:-0,-3.61,-72	0/0:-0,-13.25,-260	0/0:-0,-11.44,-228	0/0:-0,-18.06,-358	0/0:-0,-9.63,-192	0/1:-30,-8.43,-132	0/0:-0,-8.43,-165	0/0:-0,-12.64,-252	0/0:-0,-6.62,-132	0/0:-0,-13.85,-274.8	0/0:-0,-8.43,-168	0/0:-0,-10.84,-216	0/0:-0,-3.01,-60	0/0:-0,-6.62,-132	0/0:-0,-10.24,-200	0/0:-0.6,-9.63,-180.6	0/0:-0,-7.83,-156	0/0:-0,-12.04,-238	0/0:-0,-12.04,-236.4	0/0:-0,-10.24,-202	0/0:-0,-12.04,-240	0/0:-0,-8.43,-168	0/0:-0,-22.28,-438	0/0:-0,-22.28,-439	0/1:-68.2,-12.04,-156	0/0:-0,-3.61,-72	0/0:-0,-5.42,-108	0/0:-0,-8.43,-168	0/0:-0,-6.62,-132
chr9	14362958	A	<INS:ME:Bov-A2>	PASS	TSD=dTTTTCT;ASSESS=5;INTERNAL=null,null;SVTYPE=Bov-A2;SVLEN=267;MEINFO=Bov-A2,1,268,-;DIFF=0.6:c17a,t38a,c46t,c54t,g85a,t90a,c111g,n119-175,a187g,a223t,c234a;LP=12;RP=6;RA=1;PRIOR=false;SR=23	0/0:-0,-14.45,-288	0/1:-70.43,-14.45,-193.4	0/0:-0,-13.85,-276	0/0:-0,-8.43,-168	0/0:-0,-11.44,-227.8	0/0:-0,-9.63,-192	0/0:-0,-12.04,-240	0/0:-0,-6.62,-132	0/0:-0,-13.25,-264	0/0:-0,-11.44,-227	0/0:-0,-19.27,-382	0/1:-36,-12.04,-202	0/0:-0,-12.04,-240	0/0:-0,-5.42,-108	0/0:-0,-9.03,-180	0/0:-0,-6.02,-120	0/0:-1.2,-10.24,-178.1	0/0:-0,-6.02,-120	0/0:-0,-15.65,-312	0/0:-0.6,-7.83,-144.6	0/0:-0,-12.04,-240	0/0:-0,-2.41,-48	0/0:-0,-6.02,-120	0/0:-0.73,-9.03,-157.4	0/0:-0.6,-15.05,-274.8	0/0:-0.6,-11.44,-203	0/0:-0,-17.46,-348	0/0:-0,-10.84,-216	0/0:-1.2,-13.85,-249.2	0/0:-0,-9.63,-192	0/0:-1.35,-13.85,-217.6	0/0:-0,-10.24,-204	0/0:-0,-10.24,-204	0/0:-0,-16.26,-320.8	0/0:-0,-9.03,-180	0/0:-1.2,-7.83,-133.2	0/0:-0,-13.25,-264	0/0:-0,-6.62,-132
chr9	16746927	G	<INS:ME:Bov-A2>	PASS	TSD=null;ASSESS=4;INTERNAL=null,null;SVTYPE=Bov-A2;SVLEN=269;MEINFO=Bov-A2,0,269,+;DIFF=1:g35a,g55a,g88a,a92g,c97g,c103t,a124g,t129a,a137c,c162t,i199c,g202a,c230t,c255t;LP=30;RP=38;RA=-0.341;PRIOR=false;SR=9	0/0:-0,-18.66,-368	0/0:-0,-10.84,-216	0/0:-0,-10.84,-216	0/0:-0,-7.22,-144	0/0:-0,-12.04,-240	0/0:-0,-12.64,-250.3	0/0:-0,-13.85,-274	0/0:-0,-17.46,-348	0/0:-0,-13.85,-274	0/0:-0,-6.62,-132	0/0:-0,-11.44,-228	0/0:-0,-10.24,-204	0/0:-0,-13.25,-259	0/0:-0,-9.03,-180	0/0:-0,-7.22,-144	0/0:-0,-9.03,-180	0/0:-0,-6.62,-132	0/0:-0,-6.02,-120	0/1:-82.1,-14.45,-186	0/0:-0,-8.43,-168	0/0:-1.81,-13.85,-233.11	0/0:-0,-4.82,-94.2	0/0:-0,-7.22,-144	0/0:-0,-12.04,-239.2	0/0:-0,-9.63,-192	0/0:-0,-12.04,-238	0/0:-0,-11.44,-228	0/0:-0,-16.26,-322	0/0:-0,-10.84,-216	0/0:-0,-13.85,-273.2	0/0:-0,-9.03,-180	0/0:-0,-14.45,-286	0/0:-0,-7.83,-156	0/1:-67.1,-13.25,-180	0/0:-0,-11.44,-228	0/1:-30,-7.22,-102	0/0:-0,-6.02,-120	0/0:-0,-9.63,-192
chr9	18845302	A	<INS:ME:Bov-A2>	PASS	TSD=dAAAAA;ASSESS=5;INTERNAL=null,null;SVTYPE=Bov-A2;SVLEN=266;MEINFO=Bov-A2,2,268,-;DIFF=0.49:n1,a10t,c17a,n36,c46a,t72c,g98a,a100g,g112a,a131c,n133,t138a,n140,t143a,t222c,t224c;LP=4;RP=1;RA=2;PRIOR=false;SR=9	0/1:-42.2,-15.05,-230.2	0/0:-0.03,-11.44,-207.5	0/0:-0.04,-15.05,-277.1	0/0:-1.21,-8.43,-133	0/0:-0,-11.44,-211.8	0/0:-0,-10.24,-180.3	0/0:-0.6,-13.25,-250.6	0/0:-0,-10.84,-204.8	0/0:-1.2,-17.46,-315.2	0/0:-0,-9.63,-182.2	0/0:-0,-12.64,-241.7	0/0:-0,-10.24,-193	0/0:-0,-10.84,-204.7	0/0:-1.23,-16.26,-280.9	0/1:-43.03,-8.43,-108.7	0/1:-74,-7.22,-52	0/0:-0.6,-7.22,-129.7	0/0:-0,-10.24,-192	0/0:-0.6,-10.24,-186.5	0/0:-0.6,-6.02,-102.6	0/0:-1.2,-13.25,-220.6	0/0:-0,-4.82,-84.6	0/1:-54,-10.84,-141	0/0:-0,-7.22,-134	0/0:-1.26,-7.83,-119.6	0/0:-0,-12.04,-230.4	0/1:-42,-12.04,-174.2	0/0:-0.6,-8.43,-145.2	0/1:-60.77,-12.64,-158.8	0/0:-1.2,-12.04,-204.9	0/0:-0,-10.24,-191	0/0:-0.17,-8.43,-139.4	0/0:-1.81,-14.45,-230.81	0/0:-0.61,-15.65,-261.8	0/0:-0,-8.43,-168	0/0:-0,-4.82,-96	0/0:-0.6,-9.63,-172.2	0/0:-0,-8.43,-168
chr9	21375304	T	<INS:ME:Bov-A2>	PASS	TSD=GATAATGACTTTTT;ASSESS=5;INTERNAL=null,null;SVTYPE=Bov-A2;SVLEN=267;MEINFO=Bov-A2,1,268,+;DIFF=0.4:c17a,c18g,g39a,c46t,c47t,c63t,g65a,c89a,g93t,g98a,g104a,c111t,t134a,n141,a148g,n152,a153c,c197t,g198t,g200c,c218a,g226t,g231a,g238c,g242t,c246t;LP=2;RP=2;RA=0;PRIOR=false;SR=10	0/0:-0.3,-17.46,-336.8	0/1:-65,-7.22,-72.03	0/0:-0,-12.04,-236.8	0/0:-0,-6.02,-120	0/0:-0,-15.65,-312	0/0:-0,-13.25,-264	0/0:-0,-15.65,-308	0/0:-0,-13.85,-275	0/0:-0,-14.45,-287.8	0/0:-0,-9.63,-192	0/0:-0.73,-14.45,-271.2	0/1:-60,-9.03,-120	0/0:-0,-16.86,-336	0/0:-0,-15.65,-312	0/0:-0,-7.83,-156	0/0:-0,-6.62,-132	0/0:-0,-8.43,-168	0/0:-0.6,-4.21,-72.6	0/0:-0,-14.45,-287.8	0/0:-0,-12.64,-252	0/0:-0,-19.87,-396	0/0:-0,-3.61,-72	0/0:-0,-4.21,-84	0/0:-0,-16.26,-322	0/0:-0,-9.03,-180	0/0:-0.6,-3.61,-60.6	0/0:-0,-12.04,-240	0/0:-0.6,-13.85,-260.5	0/0:-0,-12.64,-250	0/0:-0,-10.84,-216	0/1:-94,-9.63,-93.6	0/0:-0,-18.06,-360	0/0:-0,-18.66,-371.2	0/0:-0,-8.43,-168	0/0:-0,-6.62,-132	0/0:-0,-6.62,-132	0/0:-0,-5.42,-108	0/0:-0,-7.83,-156
chr9	22348498	T	<INS:ME:Bov-A2>	PASS	TSD=dATG;ASSESS=5;INTERNAL=null,null;SVTYPE=Bov-A2;SVLEN=264;MEINFO=Bov-A2,4,268,-;DIFF=0.37:n1-3,c9a,c17a,t50c,g52a,c63g,g73a,c87t,t90a,a91g,g98a,c103t,n112-269;LP=4;RP=1;RA=2;PRIOR=false;SR=4	0/0:-0,-13.25,-264	0/0:-1.21,-11.44,-195	0/0:-0,-12.04,-238	0/0:-0.6,-13.25,-250.6	0/0:-0,-12.04,-240	0/0:-0,-6.02,-120	0/0:-0,-15.05,-300	0/0:-0,-9.63,-192	0/0:-0,-11.44,-225	0/0:-0,-7.83,-152	0/0:-0,-8.43,-165	0/1:-15.4,-4.21,-53.63	0/0:-0,-18.06,-358	0/0:-0,-9.63,-192	0/0:-0,-8.43,-166	0/0:-0,-5.42,-108	0/1:-30.9,-6.62,-93.04	0/0:-0,-13.85,-276	0/0:-0,-15.65,-310	0/0:-0,-9.03,-180	0/0:-0,-13.25,-262	0/0:-0,-4.82,-92.2	0/0:-0,-7.22,-144	0/0:-0,-7.22,-137.9	0/0:-0.6,-12.04,-226.6	0/0:-0,-13.85,-275.7	0/0:-0,-12.04,-240	0/0:-0,-12.64,-251.5	0/0:-0.6,-15.65,-292.2	0/0:-0,-10.24,-204	0/0:-0,-12.04,-238	0/0:-0,-15.05,-300	0/0:-0,-7.22,-144	0/0:-0,-13.25,-262.9	0/0:-0,-12.64,-252	0/0:-0,-10.24,-202.2	0/0:-0,-6.02,-120	0/0:-0,-5.42,-108
chr9	26708618	T	<INS:ME:Bov-A2>	PASS	TSD=null;ASSESS=4;INTERNAL=NM_001102345.1,INTRONIC;SVTYPE=Bov-A2;SVLEN=269;MEINFO=Bov-A2,0,269,+;DIFF=1:a41c,c54g,a92g,g198c,g199a,c218t,t222c,g241a,a245g;LP=4;RP=4;RA=0;PRIOR=false;SR=4	0/0:-0,-12.64,-252	0/0:-0,-8.43,-168	0/0:-0.05,-16.86,-329	0/0:-0,-6.02,-120	0/0:-0,-15.05,-300	0/0:-0,-9.03,-180	0/0:-0,-12.04,-240	0/0:-0,-16.26,-324	0/0:-0,-20.47,-408	0/0:-0,-7.22,-144	0/0:-0,-14.45,-288	0/0:-0,-15.05,-300	0/0:-0,-15.65,-312	0/0:-0,-13.25,-264	0/0:-0,-9.03,-180	0/0:-0,-4.82,-96	0/0:-0.6,-8.43,-156.6	0/0:-0,-4.82,-96	0/0:-0,-15.05,-300	0/0:-0,-7.83,-156	0/0:-0,-15.05,-300	0/0:-0,-4.21,-84	0/0:-0,-6.02,-120	0/0:-0,-8.43,-168	0/0:-0,-8.43,-168	0/0:-0,-9.63,-192	0/0:-0,-12.04,-240	0/0:-0,-12.04,-240	0/0:-0,-15.65,-312	0/0:-0,-9.03,-180	0/0:-0,-8.43,-168	0/0:-0,-17.46,-348	0/0:-0,-9.63,-192	0/0:-0,-9.63,-192	0/0:-0,-4.82,-96	0/0:-0,-9.03,-180	0/1:-116,-10.84,-84	0/0:-0,-7.83,-156
chr9	28178002	A	<INS:ME:Bov-A2>	PASS	TSD=null;ASSESS=4;INTERNAL=null,null;SVTYPE=Bov-A2;SVLEN=267;MEINFO=Bov-A2,1,268,+;DIFF=0.44:c9a,c17a,c48t,a49g,g73a,g88a,t90a,g98a,c111t,t115c,n120-269;LP=52;RP=60;RA=-0.206;PRIOR=false;SR=65	0/0:-0,-15.65,-312	0/1:-41.5,-9.03,-118	0/1:-65.3,-15.05,-195.67	0/1:-73.31,-10.24,-107.8	0/1:-42.9,-13.85,-224	0/1:-36,-6.62,-94	0/0:-0,-9.63,-192	0/1:-67.5,-16.26,-234.7	0/0:-1.2,-10.24,-179.1	0/1:-30,-12.04,-198	0/0:-0,-12.64,-252	0/1:-39,-9.63,-128	0/0:-1.2,-14.45,-257	0/0:-0.6,-9.03,-162.6	0/0:-0,-12.04,-240	0/0:-0,-5.42,-106	0/1:-53.93,-7.22,-72.7	0/1:-54.3,-9.03,-114.01	0/1:-86.1,-16.26,-218.08	0/0:-0.73,-8.43,-147.2	0/1:-32.3,-12.04,-200	0/0:-0.6,-2.41,-32.6	0/1:-47.03,-9.63,-129.2	0/0:-0,-10.24,-194	0/0:-0.6,-12.64,-230	0/1:-48.4,-13.85,-197.8	0/0:-0,-10.84,-216	0/0:-0,-16.26,-322	0/1:-87.01,-13.85,-163	0/1:-56.5,-13.25,-185.8	0/1:-42.01,-12.64,-175.9	0/1:-56,-10.24,-142	0/1:-45.5,-13.25,-212	0/0:-1.2,-9.63,-163.3	0/0:-1.36,-7.83,-117	0/1:-20.5,-3.61,-48	0/1:-50.33,-9.63,-119.03	0/0:-0,-6.62,-132
chr9	31495298	C	<INS:ME:Bov-A2>	PASS	TSD=dACTGGACACGATTGAGCGACTGAT;ASSESS=5;INTERNAL=XR_003036310.1,INTRONIC;SVTYPE=Bov-A2;SVLEN=266;MEINFO=Bov-A2,2,268,-;DIFF=0.25:n1,g55a,a68g,g69t,a75g,g76a,c78t,g85a,t90a,n116-269;LP=2;RP=8;RA=-2;PRIOR=false;SR=4	0/0:-0.26,-12.64,-210.2	0/0:-0,-16.26,-303.5	0/0:-0,-9.03,-160.8	0/0:-0.95,-12.04,-203.2	0/0:-0.6,-6.62,-103.7	0/0:-0,-14.45,-263.9	0/0:-0.44,-11.44,-194.9	0/0:-0.08,-7.22,-124.4	0/0:-0.12,-9.03,-149.7	0/0:-0,-6.02,-112	0/0:-0.74,-12.64,-213.5	0/0:-0.6,-3.01,-40.6	0/0:-0,-15.65,-264.4	0/0:-0.43,-10.84,-192.7	0/0:-0,-7.83,-143	0/0:-0.6,-2.41,-30.6	0/1:-46.13,-6.62,-68.6	0/0:-0.63,-9.63,-154	0/0:-0.17,-13.85,-232.2	0/0:-0.22,-11.44,-203.2	0/0:-0.01,-13.25,-225.2	0/0:-0,-3.01,-56	0/0:-0,-11.44,-199.1	0/0:-0,-3.01,-50	0/0:-0,-6.02,-102.2	0/0:-0.73,-9.63,-153.4	0/0:-0.1,-18.66,-334	0/0:-0,-7.83,-143.5	0/0:-0.82,-9.63,-147	0/0:-0,-7.83,-136	0/0:-1.2,-9.03,-135.5	0/0:-0.6,-13.25,-222.9	0/0:-0.32,-10.84,-175.1	0/0:-0.22,-14.45,-256.4	0/0:-0,-11.44,-205	0/0:-0.01,-6.02,-96.1	0/0:-0,-7.22,-132	0/0:-0.08,-9.03,-152.3
chr9	43443716	A	<INS:ME:Bov-A2>	PASS	TSD=null;ASSESS=3;INTERNAL=XM_010808463.3,INTRONIC;SVTYPE=Bov-A2;SVLEN=264;MEINFO=Bov-A2,4,268,-;DIFF=0.92:n1-3,g56c,g88c,a109c,g110t,c197t,c230t,g247a,a253c,c255t,n265-269;LP=52;RP=95;RA=-0.869;PRIOR=false;SR=22	0/0:-0,-14.45,-288	0/0:-0,-8.43,-168	0/0:-0,-16.86,-336	0/0:-0,-8.43,-168	0/0:-0,-12.04,-240	0/0:-0,-13.85,-276	0/0:-0,-11.44,-227.1	0/0:-0,-13.85,-276	0/1:-88,-16.26,-224	0/0:-0,-12.64,-252	0/1:-110,-16.86,-211.7	0/0:-0,-10.24,-204	0/0:-0,-15.05,-300	0/1:-106.9,-15.65,-188	0/0:-0,-9.63,-192	0/0:-0,-6.62,-132	0/0:-0,-9.03,-180	0/0:-0,-6.62,-132	0/0:-0,-18.06,-359.9	0/0:-0,-11.44,-228	0/0:-0,-15.65,-312	0/1:-40,-6.62,-83.1	0/1:-125.9,-12.04,-103.7	0/0:-0,-12.04,-240	0/0:-0,-16.26,-324	0/0:-0,-10.84,-216	0/0:-0,-18.66,-372	0/1:-114.02,-18.66,-235.4	0/0:-0,-16.86,-336	0/0:-0,-13.85,-276	0/0:-0,-9.63,-192	0/1:-86,-16.86,-238.8	0/1:-60,-13.25,-188	0/1:-62,-11.44,-152	0/0:-0,-9.03,-180	0/1:-134.2,-13.25,-120	0/0:-0,-4.82,-96	0/0:-0.01,-7.22,-139.8
chr9	51666461	A	<INS:ME:Bov-A2>	PASS	TSD=TAAAAAGATAGGAACAA;ASSESS=5;INTERNAL=null,null;SVTYPE=Bov-A2;SVLEN=266;MEINFO=Bov-A2,2,268,+;DIFF=0:n1,a10g,c30t,g55a,n68,n77,n80,n91-269;LP=2;RP=1;RA=1;PRIOR=false;SR=35	0/1:-84,-15.05,-214.9	0/1:-108,-9.03,-69.3	0/0:-0,-10.84,-216	0/0:-0,-4.21,-84	0/0:-0.6,-11.44,-216.6	0/1:-96,-12.64,-156	0/0:-0,-16.86,-336	0/0:-1.2,-12.04,-217.2	0/0:-0.6,-17.46,-336.6	0/1:-36,-6.62,-95.6	0/0:-0,-20.47,-408	0/1:-132,-13.25,-130	0/0:-0.6,-10.84,-203.6	0/1:-96,-13.25,-167.2	0/1:-60,-10.84,-153.2	0/0:-0.6,-4.82,-78.5	0/0:-0,-7.22,-140	0/1:-72,-4.82,-24	0/0:-1.82,-19.27,-344.71	0/0:-0,-7.22,-144	0/0:-1.2,-10.84,-193.2	0/0:-0.6,-2.41,-36.6	0/0:-0,-3.01,-60	0/0:-0,-12.64,-243.5	0/0:-1.2,-7.83,-133.2	0/1:-138.3,-15.65,-164.9	0/0:-1.2,-18.66,-349.2	0/0:-1.2,-15.65,-288.5	0/1:-56.7,-15.05,-238.3	0/1:-96,-14.45,-192	0/1:-95.1,-7.83,-60	0/0:-1.2,-20.47,-384	0/1:-156,-18.06,-204	0/0:-0.6,-10.24,-191.4	0/1:-72,-4.82,-24	0/0:-0,-5.42,-108	0/1:-132,-9.03,-48	0/1:-144,-9.03,-36
chr9	55902553	A	<INS:ME:Bov-A2>	PASS	TSD=null;ASSESS=4;INTERNAL=null,null;SVTYPE=Bov-A2;SVLEN=267;MEINFO=Bov-A2,1,268,-;DIFF=0.72:g7a,a10g,c19a,t77a,t90g,t116g,a131c,a141g,g195c,n196,n213,n215,g216t,c218t,n223-224,g231c,c246t;LP=9;RP=1;RA=3.17;PRIOR=false;SR=9	0/0:-0,-13.85,-276	0/0:-0,-5.42,-108	0/0:-0,-10.24,-204	0/0:-0,-7.22,-144	0/1:-48.1,-14.45,-228	0/0:-0,-17.46,-346.2	0/0:-0,-11.44,-228	0/0:-0,-12.04,-240	0/0:-0,-13.25,-264	0/0:-0,-9.03,-180	0/0:-0,-16.26,-324	0/0:-0,-7.83,-154	0/0:-0,-11.44,-228	0/0:-0,-10.84,-216	0/0:-0,-12.04,-240	0/0:-0,-4.82,-96	0/0:-0,-12.04,-240	0/0:-0,-7.22,-144	0/0:-0,-13.25,-264	0/0:-0,-12.64,-252	0/0:-0,-13.85,-276	0/0:-0,-2.41,-48	0/0:-0,-7.22,-144	0/0:-1.2,-12.64,-225.2	0/0:-0,-6.62,-132	0/0:-0.6,-12.64,-240.6	0/0:-0,-16.86,-336	0/0:-0,-12.04,-238.7	0/0:-0,-11.44,-228	0/0:-0,-10.84,-216	0/0:-0,-10.24,-204	0/0:-0,-14.45,-285	0/0:-0,-13.25,-262.4	0/1:-42.8,-18.06,-310	0/0:-0,-7.22,-144	0/0:-0,-9.63,-192	0/0:-0,-10.24,-204	0/0:-0,-7.22,-144
chr9	57570183	A	<INS:ME:Bov-A2>	PASS	TSD=TAAAGCATACAGGGA;ASSESS=5;INTERNAL=null,null;SVTYPE=Bov-A2;SVLEN=267;MEINFO=Bov-A2,1,268,+;DIFF=0.65:c54t,t90a,a153c,t188c,n194-269;LP=3;RP=2;RA=0.585;PRIOR=false;SR=11	0/1:-96,-16.26,-223.4	0/0:-0,-4.82,-94.2	0/1:-144,-13.85,-132	0/0:-0.6,-4.82,-84.6	0/1:-36,-9.03,-141.7	0/1:-108,-13.85,-167.5	0/1:-72,-13.25,-186.2	0/0:-1.2,-9.63,-167.4	0/0:-1.81,-15.05,-265.81	0/0:-0.66,-4.82,-79.5	0/1:-58,-13.85,-209.4	0/0:-0,-7.83,-156	0/1:-36,-8.43,-130.4	0/1:-132,-14.45,-154.6	0/1:-48,-10.84,-168	0/1:-84,-7.22,-59.4	0/0:-1.2,-9.63,-167.1	0/0:-0,-1.2,-24	0/1:-60,-18.06,-297.5	0/1:-48,-9.03,-132	0/1:-72,-16.26,-251.1	0/1:-24,-4.21,-60	0/0:-0.6,-3.01,-48.2	0/0:-0,-13.85,-276	0/0:-0,-4.82,-94	0/0:-0,-10.24,-202.9	0/1:-108,-12.04,-130	0/0:-0,-10.24,-204	0/0:-0.6,-13.25,-249.1	0/1:-58,-10.24,-144	0/0:-0,-16.26,-320.6	0/0:-0.6,-12.64,-240.6	0/0:-1.2,-12.64,-229.2	0/1:-96,-11.44,-132	0/0:-0,-3.01,-58.7	0/0:-0,-6.02,-120	0/0:-0.6,-9.63,-180.6	0/0:-0.6,-7.22,-130.6
chr9	66095944	T	<INS:ME:Bov-A2>	PASS	TSD=null;ASSESS=4;INTERNAL=XM_024996501.1,INTRONIC;SVTYPE=Bov-A2;SVLEN=267;MEINFO=Bov-A2,1,268,-;DIFF=1:g13a,c20t,g83a,c123g,t207a,t250a,c255t,t259a;LP=16;RP=6;RA=1.415;PRIOR=false;SR=5	0/0:-0,-17.46,-348	0/0:-0,-11.44,-228	0/0:-0,-17.46,-348	0/1:-48,-4.82,-48	0/0:-0,-18.06,-359.6	0/0:-0,-10.24,-204	0/0:-0,-15.05,-300	0/0:-0,-17.46,-348	0/0:-0.65,-16.86,-317.6	0/0:-0.6,-9.03,-167.4	0/0:-0,-17.46,-348	0/0:-0.6,-13.25,-252.6	0/0:-0,-9.63,-192	0/0:-0,-14.45,-288	0/0:-0,-11.44,-228	0/0:-0,-6.02,-120	0/0:-0,-4.82,-96	0/0:-0,-3.61,-72	0/0:-0,-19.27,-380	0/0:-0,-10.24,-204	0/0:-0.6,-16.86,-324.6	0/0:-0.6,-5.42,-96.6	0/0:-0,-4.21,-84	0/1:-72,-13.85,-204	0/0:-0.6,-7.22,-132.6	0/0:-1.81,-14.45,-251.81	0/0:-0,-15.05,-299.4	0/0:-0,-7.22,-144	0/0:-0,-11.44,-228	0/0:-0,-13.25,-264	0/0:-0,-13.85,-276	0/0:-0,-12.64,-252	0/0:-0,-15.05,-300	0/0:-0,-13.85,-274	0/0:-0,-3.01,-60	0/0:-0,-6.02,-120	0/0:-0,-7.22,-144	0/0:-0,-7.22,-144
chr9	67599691	A	<INS:ME:Bov-A2>	PASS	TSD=null;ASSESS=3;INTERNAL=XM_024996984.1,INTRONIC;SVTYPE=Bov-A2;SVLEN=263;MEINFO=Bov-A2,5,268,+;DIFF=0.93:n1-4,c17a,c24t,c25t,c37t,c47a,c54t,c62t,c78t,g82a,g83c,a92g,g110t,g198a,c218t,c246t;LP=5;RP=14;RA=-1.485;PRIOR=false;SR=9	0/0:-0,-18.66,-369.2	0/0:-0,-9.03,-173.5	0/0:-0,-18.06,-347	0/0:-0,-1.2,-22	0/0:-0,-15.05,-294.6	0/0:-0,-12.04,-239.8	0/0:-0,-13.85,-271.8	0/0:-0,-10.24,-202.2	0/0:-0.03,-15.65,-305	0/0:-0,-10.24,-202	0/0:-0.13,-15.65,-303.4	0/1:-34.4,-6.62,-89.2	0/0:-0,-15.05,-291	0/0:-0,-12.64,-242.7	0/0:-0,-6.62,-132	0/0:-0,-4.21,-84	0/0:-0.6,-3.61,-60.6	0/0:-0,-4.82,-96	0/0:-0,-13.85,-272	0/0:-0.6,-6.62,-114.9	0/0:-0,-16.86,-328.8	0/0:-0,-3.01,-60	0/0:-0,-3.01,-58	0/0:-0.02,-4.21,-77.4	0/0:-0,-6.62,-130	0/0:-1.2,-11.44,-201.2	0/0:-0,-9.63,-188.4	0/0:-0,-14.45,-282.5	0/0:-0,-16.26,-318.2	0/0:-0,-10.84,-214.2	0/0:-1.2,-7.83,-131.2	0/0:-0,-13.85,-270	0/0:-0,-13.85,-271.5	0/0:-0,-13.25,-260	0/0:-0,-3.01,-60	0/0:-0.6,-8.43,-151.8	0/0:-0,-6.02,-118	0/0:-0,-5.42,-106.1
chr9	71100563	G	<INS:ME:Bov-A2>	PASS	TSD=null;ASSESS=3;INTERNAL=XR_808874.3,TERMINATOR;SVTYPE=Bov-A2;SVLEN=267;MEINFO=Bov-A2,1,268,+;DIFF=0.39:c9a,n17,g40a,a42g,c54t,g66a,g88c,g108a,c123a,g151a,n164-269;LP=4;RP=5;RA=-0.322;PRIOR=false;SR=14	0/0:-1.81,-14.45,-253.81	0/0:-0.6,-4.82,-84.6	0/0:-0,-11.44,-228	0/1:-24,-4.21,-60	0/0:-0.6,-9.63,-180.6	0/0:-0.6,-10.84,-204.6	0/0:-0.6,-10.84,-204.6	0/0:-1.2,-13.25,-241.2	0/0:-1.81,-18.06,-325.81	0/0:-0,-7.83,-154.6	0/0:-0.6,-10.24,-190.6	0/0:-0,-9.63,-192	0/0:-1.2,-14.45,-263.2	0/1:-60,-13.25,-204	0/0:-0.6,-4.82,-82.6	0/0:-0.6,-7.22,-131.3	0/0:-0.6,-7.83,-144.6	0/0:-0.6,-5.42,-96.6	0/0:-0.6,-18.66,-359.6	0/0:-0.6,-6.62,-120.6	0/0:-1.2,-15.65,-288.5	0/1:-24,-3.61,-48	0/0:-0,-4.21,-84	0/0:-0,-10.24,-200.6	0/1:-60,-9.63,-132	0/1:-58,-10.24,-142	0/1:-48,-11.44,-180	0/0:-0,-12.64,-252	0/1:-60,-15.65,-251.7	0/0:-0.6,-10.24,-192.6	0/0:-1.81,-14.45,-251.21	0/0:-0,-12.04,-240	0/0:-0.6,-16.26,-312.6	0/0:-0.73,-11.44,-210.1	0/0:-0.6,-7.22,-132.6	0/0:-0,-6.62,-132	0/0:-0,-4.82,-96	0/0:-0,-8.43,-168
chr9	81053935	C	<INS:ME:Bov-A2>	PASS	TSD=null;ASSESS=3;INTERNAL=XM_024997045.1,INTRONIC;SVTYPE=Bov-A2;SVLEN=266;MEINFO=Bov-A2,2,268,+;DIFF=0.58:n1,a16c,n41,c54t,a68g,g73a,c87t,g112a,g198t,n215,g216c,n241-269;LP=1;RP=6;RA=-2.585;PRIOR=false;SR=5	0/0:-0,-9.63,-191.2	0/0:-0,-6.02,-120	0/0:-0,-16.26,-318.4	0/0:-0,-12.64,-251.2	0/0:-0.03,-13.25,-259.2	0/0:-0,-10.84,-216	0/0:-0,-13.85,-275	0/0:-0,-11.44,-228	0/0:-0,-20.47,-406	0/0:-0,-10.24,-204	0/0:-0,-12.04,-236.6	0/0:-0,-9.03,-180	0/0:-0,-15.05,-294.2	0/0:-0,-14.45,-288	0/0:-0,-10.24,-204	0/0:-0,-7.83,-156	0/1:-56,-11.44,-168	0/0:-0,-7.22,-144	0/0:-0,-17.46,-346.8	0/1:-58,-12.64,-192	0/0:-0,-13.25,-264	0/0:-0,-6.02,-120	0/0:-0,-13.25,-264	0/0:-0,-10.24,-202	0/0:-0,-7.83,-156	0/0:-0,-14.45,-288	0/0:-0,-13.25,-260	0/0:-0,-12.64,-252	0/0:-0,-10.24,-203.3	0/0:-0,-18.06,-360	0/0:-0,-9.03,-180	0/0:-0,-8.43,-168	0/0:-0,-8.43,-168	0/0:-0,-7.83,-149.5	0/0:-0,-7.22,-144	0/0:-0,-9.63,-192	0/0:-0,-7.22,-144	0/0:-0,-10.84,-216
chr9	83104869	A	<INS:ME:Bov-A2>	PASS	TSD=dT;ASSESS=5;INTERNAL=null,null;SVTYPE=Bov-A2;SVLEN=264;MEINFO=Bov-A2,4,268,-;DIFF=0.91:n1-3,c9a,c17a,c30t,g40t,a42g,a49g,g51t,g55a,n67,a68t,a75t,t90a,a91c,g98a,g104a,i109a,c111t,n116-116,c117a,a118g,t120a,t122g,d125,n133-133,t134g,t135g,g172a,a192t,g198a,g200a,c218t,c230t;LP=16;RP=14;RA=0.193;PRIOR=false;SR=50	0/1:-107.2,-15.65,-178.43	0/1:-120,-15.05,-174	0/1:-120,-15.65,-190.8	0/1:-74.1,-7.83,-72	0/0:-1.2,-11.44,-204.8	0/1:-56,-18.06,-291.2	0/1:-62.61,-15.05,-213.46	0/0:-1.2,-10.24,-181.2	0/1:-55.6,-12.64,-182.7	0/0:-0.6,-9.03,-168.6	0/1:-60,-9.63,-132	0/0:-0.6,-7.22,-132.6	0/1:-69.6,-14.45,-210	0/1:-72,-14.45,-216	0/1:-72,-12.64,-178	0/1:-72,-9.03,-106	0/1:-84,-12.04,-156	0/1:-48,-12.04,-192	0/1:-56.41,-12.04,-169.5	0/0:-0.6,-11.44,-216.6	0/1:-67.6,-15.65,-235.7	0/0:-0,-3.61,-72	0/1:-96.5,-8.43,-58	0/0:-0,-9.63,-190	0/0:-0.6,-10.84,-204.4	0/0:-0,-13.85,-276	0/1:-36.01,-8.43,-123.7	0/0:-0.6,-12.64,-236.2	0/1:-59.3,-12.64,-173.93	0/0:-0.6,-9.03,-164.6	0/0:-0,-13.85,-276	0/0:-1.93,-15.65,-252.41	0/0:-0.61,-15.65,-288.5	0/1:-86.1,-16.86,-231.9	0/1:-110.8,-11.44,-100	0/0:-1.2,-9.03,-157.2	0/1:-72,-10.24,-112.6	0/0:-1.2,-9.03,-154.9
chr9	84733820	T	<INS:ME:Bov-A2>	PASS	TSD=null;ASSESS=3;INTERNAL=XM_010808670.3,INTRONIC;SVTYPE=Bov-A2;SVLEN=254;MEINFO=Bov-A2,15,269,-;DIFF=0.98:c25a,t34g,c37t,g66t,c136g,a160g,c197t,c255t;LP=111;RP=195;RA=-0.813;PRIOR=false;SR=69	0/0:-0,-8.43,-168	0/1:-60.74,-16.86,-207.92	0/1:-97.21,-14.45,-100.08	0/1:-242.9,-43.35,-448.29	0/1:-105.33,-16.26,-136.37	0/0:-0,-9.03,-178	0/1:-92.8,-24.08,-312.76	0/1:-38.2,-17.46,-256.37	0/0:-1.84,-16.86,-290.91	0/1:-96.2,-17.46,-161.54	0/1:-65.09,-12.04,-106.13	0/1:-65.6,-8.43,-60.46	0/1:-38.65,-10.84,-125.81	0/1:-31.6,-10.24,-141.38	0/0:-0,-9.03,-180	0/1:-80.8,-10.24,-60.33	0/1:-145.44,-18.66,-103.81	0/0:-0,-12.04,-240	0/0:-0,-9.63,-192	0/0:-0,-13.25,-262	0/1:-51.91,-18.66,-257.45	0/0:-0,-8.43,-168	0/1:-182.51,-39.74,-471.55	0/1:-47.31,-5.42,-18.8	0/1:-116.4,-17.46,-162.71	0/0:-1.22,-12.64,-214.7	0/0:-0,-9.63,-192	0/1:-74.9,-15.05,-192.01	0/0:-0,-11.44,-227.2	0/0:-0,-3.61,-71.9	0/1:-57.81,-13.85,-164.58	0/1:-19.2,-6.02,-84.01	0/1:-22.64,-10.84,-153.06	0/0:-0,-7.83,-156	0/0:-0,-21.07,-420	0/1:-60.9,-6.02,-33.01	0/1:-111.3,-15.65,-108.43	0/1:-25.1,-10.24,-138.36
chr9	86100436	T	<INS:ME:Bov-A2>	PASS	TSD=AACCACTGTAT;ASSESS=5;INTERNAL=NM_001206827.1,INTRONIC;SVTYPE=Bov-A2;SVLEN=267;MEINFO=Bov-A2,1,268,+;DIFF=1:t50c,g51a,c87t,t90g,c97t,g104a,a118c,g219a,a223c,g241a,c246t,c255t,n269;LP=69;RP=70;RA=-0.021;PRIOR=false;SR=31	0/0:-0,-13.25,-264	0/1:-253.6,-19.27,-72	0/0:-0,-15.65,-310.2	1/1:-113.2,-7.83,-1.2	0/0:-0,-12.64,-252	0/0:-0,-13.25,-264	0/0:-0,-10.84,-216	0/0:-0,-17.46,-348	0/0:-0,-19.27,-384	0/1:-29.8,-4.82,-60	0/0:-0,-12.04,-240	0/1:-20,-4.21,-58	0/0:-0,-10.84,-216	0/0:-0,-16.26,-322.7	0/0:-0,-9.03,-180	0/0:-0,-7.22,-144	0/1:-90,-11.44,-120	0/0:-0,-1.81,-36	0/0:-0,-22.28,-444	0/1:-84,-9.03,-84	0/0:-0,-10.24,-204	0/0:-0,-5.42,-108	0/1:-72,-5.42,-24	0/0:-0,-7.22,-144	0/0:-0,-9.03,-180	0/1:-76.9,-9.63,-92.7	0/0:-0,-11.44,-228	0/0:-0,-11.44,-228	0/0:-0,-16.26,-324	0/1:-60,-7.83,-84	0/0:-0,-7.22,-144	0/0:-0,-13.25,-264	0/1:-100.1,-10.84,-96	0/0:-0,-15.65,-312	0/1:-69.7,-5.42,-24	0/1:-72,-9.63,-108	1/1:-143.2,-9.63,-1.2	0/0:-0,-12.04,-240
chr9	87056723	C	<INS:ME:Bov-A2>	PASS	TSD=null;ASSESS=4;INTERNAL=XM_024996535.1,5_UTR;SVTYPE=Bov-A2;SVLEN=267;MEINFO=Bov-A2,1,268,-;DIFF=0.97:a26g,t28c,g55a,a68g,t81c,a91g,c97t,g112a,g182a,g200t,g209a,c218t,a223g,c234g;LP=187;RP=116;RA=0.689;PRIOR=false;SR=70	0/0:-0,-16.26,-324	0/1:-114.7,-31.31,-449.16	0/1:-45.5,-16.86,-262.84	0/1:-351.02,-67.43,-802.56	0/1:-76.3,-41.54,-709.82	0/0:-0,-15.65,-306.6	0/1:-111.5,-26.49,-372.44	0/0:-0,-15.65,-307.3	0/1:-209.43,-77.06,-1238.52	0/1:-89.3,-27.69,-404.27	0/1:-116.5,-32.51,-463.9	0/1:-76.85,-13.85,-154.51	0/0:-3.01,-52.38,-967.81	0/0:-3.01,-42.75,-792.41	0/0:-0,-7.22,-142.9	0/1:-53.6,-9.63,-112.6	0/1:-101.7,-21.67,-286.24	0/0:-0,-22.28,-444	0/0:-0,-36.12,-712.8	0/0:-0,-15.05,-300	0/1:-148.2,-34.32,-466.91	0/0:-0.01,-8.43,-159.9	0/0:-0.6,-41.54,-814.6	0/1:-65.9,-12.04,-142.6	0/1:-80.8,-27.09,-386.22	0/0:-0.6,-12.64,-235.2	0/0:-0,-12.64,-251.2	0/1:-49.4,-11.44,-155.91	0/0:-0,-21.07,-416.5	0/0:-0,-18.06,-360	0/1:-59.15,-25.29,-389.12	0/0:-0,-21.67,-431.8	0/1:-91.6,-26.49,-383.78	0/0:-0,-21.07,-418.7	0/0:-0,-15.65,-310.8	0/1:-50,-12.04,-155.83	0/0:-0.8,-15.65,-270.9	0/1:-91.7,-15.65,-180.07
chr9	87227778	T	<INS:ME:Bov-A2>	PASS	TSD=null;ASSESS=3;INTERNAL=XR_003036444.1,5_UTR;SVTYPE=Bov-A2;SVLEN=267;MEINFO=Bov-A2,1,268,+;DIFF=0.99:c54t,a68g,a75t,c89a,c97t,g112a,a124g,t142c,g198t;LP=22;RP=135;RA=-2.617;PRIOR=false;SR=21	0/0:-0,-13.25,-262.2	0/1:-127.11,-31.31,-370.37	0/0:-1.2,-13.25,-234.1	0/1:-194.1,-53.58,-731.02	0/1:-36.18,-31.31,-527.24	0/0:-0,-16.26,-324	0/1:-49.61,-39.13,-645.69	0/0:-0,-10.84,-211.6	0/1:-127.47,-78.87,-1332.7	0/0:-2.41,-23.48,-417.81	0/0:-2.5,-43.35,-808.81	0/1:-55.76,-23.48,-334.66	0/0:-2.41,-39.74,-698.61	0/0:-2.41,-39.13,-727.31	0/0:-0.6,-7.22,-132.1	0/0:-2.58,-12.04,-204	0/1:-39.9,-25.89,-442.87	0/0:-0,-19.27,-378.9	0/0:-0.13,-37.33,-734.6	0/0:-0,-10.24,-204	0/0:-3.13,-30.1,-526.81	0/0:-0,-6.62,-128.1	0/1:-120.1,-46.96,-739.24	0/1:-60.2,-17.46,-241.79	0/1:-101.85,-27.69,-349.32	0/1:-23.6,-10.84,-157.43	0/0:-0,-10.84,-216	0/1:-29.1,-11.44,-174.44	0/0:-0,-17.46,-331.7	0/0:-0,-19.27,-382.8	0/1:-59.85,-21.07,-279.15	0/0:-0.03,-21.07,-408.7	0/0:-1.81,-36.12,-675.21	0/0:-0,-12.64,-252	0/1:-40.1,-11.44,-156.87	0/0:-0.6,-12.04,-217.4	0/0:-0,-15.05,-296	0/0:-1.81,-15.65,-274.51
chr9	97836018	A	<INS:ME:Bov-A2>	PASS	TSD=null;ASSESS=3;INTERNAL=NM_001199065.1,INTRONIC;SVTYPE=Bov-A2;SVLEN=267;MEINFO=Bov-A2,1,268,-;DIFF=0.43:c9a,c15a,c17a,a49g,c54t,t67c,t90a,n116-117,n120-269;LP=14;RP=11;RA=0.348;PRIOR=false;SR=4	0/0:-0,-13.85,-272.7	0/0:-0.01,-9.63,-165.5	0/0:-0,-10.84,-216	0/0:-0,-12.04,-236	0/0:-0,-12.64,-252	0/0:-0,-13.25,-259.9	0/0:-0,-9.03,-180	0/0:-0,-13.85,-272.6	0/0:-0,-10.24,-197	0/0:-0,-9.03,-180	0/0:-0,-13.85,-263	0/1:-20.01,-4.82,-53.9	0/0:-0,-15.05,-300	0/0:-0,-12.04,-240	0/0:-0,-6.02,-120	0/0:-0,-4.82,-92	0/0:-0,-10.84,-203.8	0/0:-0,-12.04,-230.8	0/0:-0,-9.03,-179.5	0/0:-0,-9.03,-179.6	0/0:-0,-13.25,-264	0/0:-0,-6.02,-119.3	0/0:-0,-9.03,-180	0/0:-0,-8.43,-156.5	0/0:-0,-12.64,-252	0/0:-0.03,-8.43,-152.3	0/0:-0,-10.84,-214.7	0/0:-0,-11.44,-226	0/0:-0,-11.44,-228	0/0:-0,-6.02,-118	0/0:-0,-12.64,-244	0/0:-0,-13.25,-264	0/0:-0,-10.84,-211.7	0/0:-0,-10.24,-204	0/0:-0,-13.85,-276	0/0:-0,-3.61,-70	0/0:-0,-12.64,-240.8	0/0:-0,-9.03,-180
chr9	98287594	G	<INS:ME:Bov-A2>	PASS	TSD=null;ASSESS=3;INTERNAL=null,null;SVTYPE=Bov-A2;SVLEN=267;MEINFO=Bov-A2,1,268,+;DIFF=0.14:g8a,a11g,n32-78,t90a,n116-135,a148g,a153t,g156a,c197t,g231c,n234-269;LP=5;RP=8;RA=-0.678;PRIOR=false;SR=12	0/0:-0,-11.44,-226.9	0/0:-0.22,-12.04,-226.4	0/0:-0,-11.44,-226	0/0:-0,-6.02,-120	0/0:-0,-10.84,-213.6	0/0:-0,-9.03,-177.1	0/0:-0,-7.22,-144	0/0:-0,-10.24,-199.6	0/0:-0,-9.03,-179.4	0/0:-0,-3.01,-56.6	0/0:-0,-12.04,-240	0/0:-0,-9.63,-188	0/0:-0,-14.45,-271.7	0/0:-0,-11.44,-225.8	0/0:-0,-9.03,-170.7	0/0:-0,-9.03,-180	0/0:-0,-7.83,-153	0/0:-0,-6.62,-132	0/0:-0,-12.64,-252	0/0:-0.43,-9.03,-174.2	0/0:-0,-12.64,-252	0/0:-0,-4.82,-96	0/0:-0,-4.21,-84	0/1:-48.15,-15.65,-246.2	0/0:-0.61,-12.64,-229.2	0/0:-0,-15.05,-287.3	0/0:-0,-10.84,-209.5	0/0:-0,-10.24,-204	0/0:-0,-18.06,-358	0/0:-0,-9.63,-185.5	0/0:-0,-15.65,-288.7	0/0:-0,-11.44,-223.5	0/0:-0,-15.65,-309.8	0/0:-0,-8.43,-167.7	0/0:-0,-5.42,-108	0/0:-1.2,-10.24,-181.2	0/1:-127.2,-9.63,-60	0/0:-0.6,-8.43,-156.3
chr9	102578868	G	<INS:ME:Bov-A2>	PASS	TSD=0tsd;ASSESS=5;INTERNAL=null,null;SVTYPE=Bov-A2;SVLEN=267;MEINFO=Bov-A2,1,268,-;DIFF=0.72:c9a,c17a,t31g,g55a,g65c,g66a,t67g,g73a,t90a,i120t,n129-136,g172a,t173c,t174g,g185a,g193t,g198a,g200a,t220g,t229g,c258t,c266t;LP=24;RP=22;RA=0.126;PRIOR=false;SR=30	0/0:-0.6,-15.05,-276.7	0/1:-40,-9.63,-129.6	0/0:-0,-7.22,-140.7	0/0:-0.61,-15.05,-272.8	0/0:-0,-8.43,-164.6	0/0:-0.6,-9.63,-167.1	0/1:-46.4,-10.84,-154.9	0/0:-1.2,-12.64,-223.2	0/0:-1.2,-13.25,-228.4	0/1:-19,-5.42,-77.6	0/0:-1.81,-15.65,-254.91	0/0:-0.61,-3.61,-48.8	0/0:-0,-16.26,-324	0/0:-0.6,-13.25,-240.6	0/0:-1.33,-9.03,-145.8	0/0:-0,-7.22,-141	0/1:-24.01,-6.02,-77.6	0/1:-84,-11.44,-137.6	0/1:-46.4,-7.22,-95.5	0/0:-0,-9.63,-189.4	0/0:-0,-10.24,-204	0/1:-36.53,-7.83,-87.07	0/0:-1.2,-15.65,-287.8	0/1:-27.93,-6.02,-63.31	0/0:-0,-6.62,-127	0/0:-0,-13.25,-253.8	0/0:-0,-9.03,-180	0/0:-0.73,-9.03,-159.2	0/0:-0.6,-7.83,-137	0/0:-0.63,-10.84,-180.9	0/0:-0.6,-13.85,-256	0/0:-0.6,-12.04,-228.6	0/0:-0.08,-10.84,-201.7	0/1:-33,-8.43,-122.3	0/0:-0,-18.66,-372	0/0:-0,-9.03,-180	0/1:-81.23,-12.64,-136.7	0/0:-0,-7.22,-144
chr9	104338058	T	<INS:ME:Bov-A2>	PASS	TSD=TCATTCAACTCATT;ASSESS=5;INTERNAL=XM_002699141.3,PROMOTER;SVTYPE=Bov-A2;SVLEN=266;MEINFO=Bov-A2,2,268,+;DIFF=0.88:n1,g8c,a53g,c54t,d71,n78,g98a,c103g,c111t,a141c,c165g,c197t,g209t,g219a,c234a,c240t,c255t,n265-269;LP=13;RP=7;RA=0.893;PRIOR=false;SR=9	0/0:-0,-11.44,-226	0/0:-0.17,-4.21,-72.5	0/1:-98.7,-16.86,-215.11	0/0:-0,-4.21,-84	0/0:-0,-13.85,-276	0/0:-0,-11.44,-228	0/0:-0,-10.84,-214	0/0:-0,-12.04,-234.8	0/0:-0,-12.64,-252	0/0:-0,-6.02,-120	0/0:-0,-10.84,-216	0/0:-0,-15.65,-310.9	0/0:-0,-14.45,-284.6	0/0:-0,-16.26,-324	0/0:-0,-12.04,-240	0/0:-0,-6.62,-132	0/0:-0,-7.83,-156	0/0:-0,-7.22,-140.8	0/0:-0,-15.65,-308.8	0/0:-0,-7.83,-156	0/0:-0,-9.03,-180	0/0:-0,-7.22,-144	0/0:-0,-7.22,-144	0/0:-0,-12.64,-250.5	0/1:-108.4,-10.84,-70.01	0/0:-0.03,-4.21,-73.2	0/0:-0,-11.44,-226	0/0:-0,-9.03,-176	0/0:-0,-14.45,-288	0/0:-0,-10.84,-211.2	0/0:-0,-4.82,-96	0/0:-0,-12.04,-239.4	0/0:-0,-7.22,-144	0/0:-0,-15.05,-300	0/0:-0,-8.43,-168	0/0:-0,-4.21,-84	0/0:-0.17,-10.24,-198.5	0/0:-0,-7.83,-156
chr10	6260172	T	<INS:ME:Bov-A2>	PASS	TSD=TTTTTTTTTTTTT;ASSESS=5;INTERNAL=null,null;SVTYPE=Bov-A2;SVLEN=266;MEINFO=Bov-A2,2,268,+;DIFF=0.65:n1,c18t,t28a,g55a,t67c,g73a,g82a,g88c,g93t,g98a,g183a,g193t,g198a,g200a,g204c,t210c,g211a,g216a,c218a,t224c,g231a,c234g,g236c,c240t,c246t,n251-269;LP=2;RP=6;RA=-1.585;PRIOR=false;SR=9	0/0:-0,-9.63,-192	0/0:-0,-7.83,-156	0/0:-0,-15.05,-299	0/0:-0.6,-5.42,-94.6	0/0:-0,-15.65,-312	0/0:-0.6,-13.85,-264.5	0/0:-0,-13.25,-262	0/0:-0.6,-21.07,-405.3	0/0:-0,-15.05,-299.3	0/0:-0,-6.02,-120	0/0:-0,-13.85,-276	0/0:-0,-3.61,-70	0/0:-0,-12.04,-238	0/0:-0,-12.04,-238	0/0:-0,-6.62,-132	0/0:-0,-2.41,-48	0/0:-1.2,-10.24,-178.6	0/0:-0,-7.22,-144	0/0:-0,-13.25,-264	0/0:-0,-7.83,-156	0/0:-0,-10.24,-200	0/0:-0,-1.2,-24	0/0:-0,-8.43,-168	0/0:-0,-3.61,-68	0/0:-0,-6.02,-120	0/0:-0,-7.83,-150	0/1:-36,-10.24,-166	0/0:-0,-12.64,-250	0/0:-0,-13.25,-264	0/0:-0.6,-13.85,-262.6	0/0:-0,-7.22,-144	0/0:-0.6,-10.24,-190.6	0/0:-0,-8.43,-168	0/0:-0,-6.62,-132	0/0:-0,-7.83,-155.4	0/0:-0.02,-6.02,-115.4	0/0:-0.6,-8.43,-152.5	0/0:-0,-9.63,-190.5
chr10	6411507	T	<INS:ME:Bov-A2>	PASS	TSD=TCTTATATGCT;ASSESS=5;INTERNAL=null,null;SVTYPE=Bov-A2;SVLEN=267;MEINFO=Bov-A2,1,268,+;DIFF=1:c54t,a68g,g69a,a92g,g112a,c125t,c130a,a146g,a223g,c230t,c240t,c255t,t259g,t260c;LP=144;RP=127;RA=0.181;PRIOR=false;SR=62	0/1:-94,-10.24,-96	0/0:-0,-10.24,-204	0/0:-0,-6.62,-132	0/1:-226,-24.08,-216	0/0:-0,-11.44,-226	0/1:-94,-9.03,-72	0/0:-0,-10.84,-216	0/0:-0,-7.22,-144	1/1:-231.2,-14.45,-1.2	0/0:-0,-6.62,-132	0/0:-0,-7.22,-144	1/1:-92,-5.42,-0	0/1:-148,-17.46,-178	0/0:-0,-10.24,-204	0/0:-0,-9.03,-180	0/1:-66,-6.62,-58	0/0:-0,-9.63,-192	0/0:-0,-12.04,-240	0/1:-144,-12.64,-80.3	0/1:-138,-10.84,-60	0/0:-0,-7.22,-144	0/0:-0,-7.83,-156	0/0:-0,-5.42,-108	1/1:-144,-8.43,-0	0/1:-164,-12.04,-46	1/1:-240,-13.85,-0	0/1:-132.9,-9.63,-35.5	0/0:-0,-7.22,-144	1/1:-210,-12.04,-0	0/1:-86,-10.24,-108	0/0:-0,-10.24,-204	0/0:-0,-9.03,-180	1/1:-156.6,-9.63,-0.6	0/0:-0,-12.04,-240	0/1:-154,-17.46,-168	1/1:-278,-16.26,-0	1/1:-236,-13.85,-0	1/1:-278,-16.26,-0
chr10	8102531	A	<INS:ME:Bov-A2>	PASS	TSD=null;ASSESS=3;INTERNAL=NM_001101202.2,PROMOTER;SVTYPE=Bov-A2;SVLEN=269;MEINFO=Bov-A2,0,269,-;DIFF=1:c17a,c54t,g65t,c103t,a109g,g112a,c161t,g200t,a203g,c218t;LP=20;RP=17;RA=0.234;PRIOR=false;SR=8	0/0:-0,-11.44,-228	0/1:-131.3,-13.85,-119	0/0:-0,-15.05,-298	0/0:-0,-16.26,-324	0/0:-0,-6.62,-132	0/0:-0,-13.85,-274	0/0:-0,-10.24,-204	0/0:-0,-20.47,-407.9	0/0:-0,-17.46,-348	0/0:-0,-11.44,-228	0/0:-0,-10.24,-204	0/0:-0,-3.61,-72	0/0:-0,-15.65,-312	0/0:-0,-11.44,-228	0/0:-0,-9.63,-190	0/0:-0,-1.81,-36	0/0:-0,-7.22,-144	0/0:-0,-7.22,-144	0/0:-0,-10.84,-216	0/0:-0,-7.22,-144	0/0:-0,-14.45,-288	0/0:-0,-7.22,-144	0/0:-0,-9.63,-192	0/0:-0,-7.83,-156	0/0:-0,-9.63,-192	0/0:-0,-11.44,-228	0/0:-0,-11.44,-228	0/0:-0,-11.44,-228	0/0:-0,-11.44,-228	0/0:-0,-6.62,-132	0/0:-0,-6.62,-132	0/0:-0,-8.43,-168	0/0:-0,-11.44,-228	0/0:-0,-11.44,-228	0/0:-0,-9.63,-192	0/0:-0,-8.43,-168	1/1:-246.6,-15.05,-0.6	0/0:-0,-6.62,-132
chr10	8791283	T	<INS:ME:Bov-A2>	PASS	TSD=CT;ASSESS=5;INTERNAL=null,null;SVTYPE=Bov-A2;SVLEN=267;MEINFO=Bov-A2,1,268,+;DIFF=1:g8a,c54t,a68g,g104a,t135c,a149g,g241t,c246t,c255t;LP=14;RP=16;RA=-0.193;PRIOR=false;SR=11	0/0:-0,-15.05,-300	0/0:-0,-6.62,-132	0/0:-0,-18.06,-360	0/0:-0,-9.63,-192	0/0:-0,-9.63,-192	0/0:-0,-16.26,-321.9	0/0:-0,-10.24,-204	0/0:-0,-10.24,-204	0/0:-0.6,-18.06,-348.6	0/0:-0,-9.63,-192	0/0:-0,-10.84,-216	0/0:-0,-7.22,-142	0/0:-0,-13.85,-276	0/0:-0,-13.25,-264	0/0:-0,-10.24,-204	0/0:-0,-8.43,-168	1/1:-139.2,-9.03,-1.2	0/0:-0,-7.83,-156	0/0:-0,-13.85,-273.6	0/0:-0,-6.02,-120	0/0:-0,-13.25,-264	0/0:-0,-4.82,-96	0/0:-0,-10.24,-204	0/0:-0,-10.84,-216	0/0:-0,-8.43,-168	0/0:-0,-10.24,-202	0/0:-0,-11.44,-226	0/0:-0,-11.44,-228	0/0:-0.6,-13.25,-250.8	0/0:-0,-8.43,-167.8	0/0:-0,-10.24,-204	0/0:-0,-11.44,-228	0/0:-0,-12.64,-252	0/0:-0,-9.03,-180	0/0:-0,-2.41,-48	0/0:-0,-6.02,-120	1/1:-195.2,-12.64,-1.2	0/0:-0,-7.83,-156
chr10	22853159	T	<INS:ME:Bov-A2>	PASS	TSD=TTCTCCTAGCCT;ASSESS=5;INTERNAL=XM_002707890.5,INTRONIC;SVTYPE=Bov-A2;SVLEN=262;MEINFO=Bov-A2,7,269,-;DIFF=0.74:n1-43,t67a,c87t,a91g,a94g,g112a,i120t,c125a,g200c,g201a,g219a,c240t;LP=167;RP=81;RA=1.044;PRIOR=false;SR=38	0/0:-0.35,-13.85,-222.3	0/1:-51.2,-10.84,-106.88	0/1:-51.61,-17.46,-222.88	0/1:-89.71,-11.44,-46.4	0/1:-51.32,-17.46,-219.84	0/1:-108.34,-19.27,-135.88	0/1:-46.4,-6.62,-57.1	0/1:-59.33,-12.64,-125.6	0/1:-63.67,-27.69,-401.29	0/1:-37.55,-12.04,-144.1	0/1:-60.85,-22.28,-292.43	0/1:-24.6,-13.85,-212.69	0/1:-77.89,-20.47,-222.59	0/1:-42.9,-18.66,-268.43	0/1:-32,-7.22,-67.46	0/1:-40.5,-10.24,-114.8	0/1:-31.02,-10.24,-146.6	0/0:-0.52,-12.04,-206.3	0/0:-2.08,-15.05,-214.91	0/1:-74.3,-21.67,-263.9	0/0:-2.63,-25.29,-410.21	0/0:-1.23,-9.03,-130.7	0/1:-60.85,-13.25,-125.54	0/1:-16.73,-5.42,-52.9	0/1:-19.67,-12.04,-166.17	0/1:-22.8,-12.64,-189.6	0/1:-18.8,-6.02,-84.3	0/1:-100.86,-18.66,-162.04	0/1:-49.74,-15.65,-207.21	0/1:-35.82,-13.25,-170.55	0/1:-29.12,-13.85,-182.32	0/0:-1.81,-12.64,-201	0/1:-67.96,-19.27,-185.91	0/1:-33.9,-9.63,-115.58	0/1:-33.24,-10.84,-141.02	0/1:-49.6,-12.64,-158.98	0/1:-40.3,-9.03,-77.64	0/1:-32.93,-8.43,-100.77
chr10	22893621	T	<INS:ME:Bov-A2>	PASS	TSD=null;ASSESS=3;INTERNAL=XR_003036781.1,INTRONIC;SVTYPE=Bov-A2;SVLEN=267;MEINFO=Bov-A2,2,269,-;DIFF=0.97:n17,c54t,c111t,a118g,g151c,c197t,g231a,c240t,c255t,n265-269;LP=101;RP=14;RA=2.851;PRIOR=false;SR=8	0/0:-0.38,-20.47,-334.4	0/0:-1.54,-10.24,-131.6	0/1:-30.29,-24.08,-373.27	0/1:-25.23,-10.24,-115.2	0/0:-0.62,-14.45,-232.2	0/1:-76.17,-21.07,-195.46	0/1:-58.46,-19.87,-223.32	0/1:-30.99,-19.87,-283.92	0/1:-51.73,-21.07,-214.56	0/0:-2.11,-15.05,-207.51	0/0:-0.48,-13.25,-213.7	0/0:-1.21,-12.64,-182.5	0/1:-24.24,-18.66,-231.35	0/1:-44.96,-23.48,-278.51	0/0:-1.04,-6.62,-82.6	0/0:-0.03,-7.22,-116.5	0/0:-1.93,-20.47,-289.11	0/0:-0.78,-11.44,-173.1	0/1:-24.07,-18.06,-229.27	0/1:-42.15,-15.05,-169.85	0/0:-0.04,-16.86,-280.1	0/0:-0.01,-7.22,-104.1	0/1:-48.01,-15.65,-195.63	0/0:-0.91,-10.84,-157.1	0/0:-0.02,-10.24,-152.6	0/0:-1.4,-17.46,-239.2	0/0:-0.05,-7.83,-130.7	0/1:-21.38,-12.64,-159.71	0/0:-1.81,-14.45,-232.41	0/0:-1.87,-15.05,-197.11	0/1:-39.96,-19.87,-191.74	0/0:-1.87,-22.28,-333.3	0/1:-32.44,-15.65,-205.68	0/1:-33.42,-13.85,-162.78	0/0:-1.63,-16.86,-254.5	0/0:-0.61,-10.84,-172.7	0/0:-2.12,-15.65,-226.11	0/1:-48.47,-10.24,-96.77
chr10	23336722	C	<INS:ME:Bov-A2>	PASS	TSD=null;ASSESS=3;INTERNAL=null,null;SVTYPE=Bov-A2;SVLEN=267;MEINFO=Bov-A2,1,268,-;DIFF=0.96:a10g,t31a,a68g,c78t,t81c,c89a,t90g,a102t,g110a,c125a,c130g,t142c,d194,n197,g198t,g219a,a223g,c230t,c255t,t259c;LP=144;RP=97;RA=0.57;PRIOR=false;SR=7	0/1:-35.88,-20.47,-233.99	0/0:-2.57,-18.66,-242.2	0/1:-26.79,-24.08,-324.49	0/1:-56.4,-8.43,-24.2	0/1:-30.74,-15.65,-217.07	0/0:-4.11,-26.49,-358.81	0/1:-48.98,-18.06,-198.01	0/0:-2.27,-14.45,-220.6	0/0:-1.26,-15.65,-257	0/0:-3.49,-15.65,-210.2	0/0:-2.74,-23.48,-387.11	0/0:-2.37,-18.06,-261.6	0/0:-0.6,-9.63,-163.2	0/1:-59.8,-22.28,-299.73	0/0:-2.3,-10.84,-143.5	0/0:-1.72,-9.63,-154.8	0/1:-22.61,-14.45,-205.93	0/1:-60.69,-12.04,-84.6	0/0:-4.14,-27.09,-434.31	0/1:-14.44,-12.04,-150.3	0/1:-28.95,-23.48,-363.25	0/0:-2.39,-9.63,-104.9	0/1:-22.18,-5.42,-35.04	0/0:-1.63,-14.45,-243.1	0/0:-1.06,-13.25,-208.5	0/0:-0.36,-15.05,-253.6	0/1:-40.52,-16.86,-194.06	0/1:-18.7,-9.03,-142.7	0/1:-48.72,-18.66,-229.78	0/0:-2.9,-15.05,-218.11	0/0:-2.55,-25.29,-406.11	0/1:-37.02,-19.27,-285.26	1/1:-28.1,-3.61,-1.3	0/0:-1.9,-16.86,-276.01	0/1:-72.34,-16.26,-160.34	0/0:-1.53,-7.83,-95	0/1:-41.19,-16.86,-206.34	0/1:-37.8,-7.22,-64.69
chr10	23659851	C	<INS:ME:Bov-A2>	PASS	TSD=null;ASSESS=3;INTERNAL=null,null;SVTYPE=Bov-A2;SVLEN=265;MEINFO=Bov-A2,3,268,+;DIFF=0.99:n1-2,a49g,c54t,a68g,g73a,g93c,t122g,c163t,g172a,t188g,g193a,d233,c246t;LP=24;RP=38;RA=-0.663;PRIOR=false;SR=11	0/0:-0.74,-54.19,-920.9	0/0:-5.46,-39.74,-463.01	0/0:-0.32,-40.34,-702	0/0:-1.83,-31.31,-485.01	0/0:-3.56,-48.77,-735.21	0/0:-2.95,-70.44,-1130.71	0/0:-2.41,-58.4,-893.4	0/0:-0.7,-53.58,-894.5	0/0:-2.63,-47.56,-719.11	0/0:-0.63,-34.92,-548.2	0/0:-1.54,-45.15,-752.9	0/0:-0.65,-53.58,-832.9	0/0:-2.91,-42.14,-610.11	0/0:-1.95,-46.36,-762.01	0/0:-2.99,-25.89,-384.9	0/0:-0.05,-18.06,-289.5	0/0:-1.89,-34.92,-543.11	0/0:-0.67,-28.3,-474	0/0:-1.28,-56.59,-919.7	0/0:-1.96,-30.71,-465.71	0/0:-1.55,-56.59,-919.1	0/0:-1.36,-17.46,-234.7	0/0:-0.01,-22.28,-382.9	0/0:-3.89,-45.15,-566.51	0/0:-0.65,-30.1,-433.2	0/0:-2.8,-43.95,-620.71	0/0:-1.54,-37.93,-624.6	0/0:-1.73,-48.16,-795.1	0/0:-1.27,-57.2,-923.6	0/0:-1.69,-42.75,-716.3	0/1:-107.97,-60.21,-717.57	0/0:-1.55,-52.98,-841.7	0/0:-1.98,-57.2,-947.61	0/0:-1.94,-45.76,-760.41	0/0:-1.93,-40.94,-659.8	0/0:-1.33,-34.32,-577.6	0/0:-3.13,-35.52,-555.31	0/0:-0.75,-27.69,-419.8
chr10	23696127	G	<INS:ME:Bov-A2>	PASS	TSD=null;ASSESS=4;INTERNAL=null,null;SVTYPE=Bov-A2;SVLEN=260;MEINFO=Bov-A2,8,268,-;DIFF=0.97:n1-7,c17a,c54t,g56c,g58a,t90a,c103t,c162t,t188c,g200c,g212a,g213a,a243c;LP=218;RP=103;RA=1.082;PRIOR=false;SR=47	0/1:-31.15,-22.28,-320.72	0/1:-37.04,-16.26,-190.08	0/1:-46.01,-25.29,-367.41	0/1:-52.21,-13.85,-133.64	0/1:-34.88,-17.46,-238.07	0/1:-65.58,-24.68,-269.79	0/1:-89.77,-29.5,-354.13	0/1:-49.6,-20.47,-245.14	0/1:-56.5,-25.89,-358.53	0/1:-33.23,-22.28,-280.35	0/1:-82.9,-22.88,-237.12	0/0:-1.85,-10.84,-134	0/1:-61.09,-21.07,-262.13	0/1:-111.9,-22.88,-230.09	0/1:-40.01,-16.26,-171	0/0:-1.21,-9.63,-140.5	0/1:-58.21,-15.65,-152.74	0/1:-76.86,-13.85,-107.39	0/1:-60.02,-18.66,-236.41	0/1:-63.35,-18.06,-171.39	0/1:-31.31,-22.88,-345.98	0/0:-0.02,-15.05,-245.9	0/1:-67.81,-11.44,-54.81	0/1:-20.01,-12.04,-171.1	0/1:-38.43,-18.06,-236.24	0/1:-50.43,-25.29,-308.31	0/1:-59.83,-19.87,-238.6	0/1:-81.96,-19.87,-230.75	0/1:-78.2,-16.86,-173.04	0/1:-63.06,-16.86,-190.73	0/1:-39.18,-24.08,-277.3	0/1:-76.19,-25.89,-286.86	0/0:-1.81,-16.26,-266.01	0/1:-34.92,-18.66,-250.98	0/1:-77.33,-18.66,-180.38	0/1:-76.9,-16.26,-164.68	0/1:-128.02,-31.31,-313.32	0/1:-26.82,-7.22,-50.33
chr10	23730416	T	<INS:ME:Bov-A2>	PASS	TSD=dGTGATTTTTTTTATTATCTCTTTTAAC;ASSESS=5;INTERNAL=XM_002690542.5,PROMOTER;SVTYPE=Bov-A2;SVLEN=267;MEINFO=Bov-A2,1,268,+;DIFF=0.99:c36t,c48t,c54t,t72c,c87t,g104a,g112a,a118c,c132t,c136a,d198,g199t,g219a,a223c;LP=31;RP=192;RA=-2.631;PRIOR=false;SR=151	0/0:-0.65,-33.72,-612.9	0/0:-1.03,-13.85,-230.7	0/0:-2.21,-35.52,-591.7	0/0:-0.08,-9.63,-169.6	0/0:-1.97,-37.93,-648.8	0/0:-1.34,-22.28,-367.6	0/0:-1.32,-21.67,-349.2	0/0:-0.94,-24.08,-420.4	0/0:-0.83,-30.71,-530	0/0:-2.95,-27.09,-419.3	0/0:-1.41,-35.52,-627.4	0/1:-39.04,-15.65,-202.4	0/0:-0.1,-20.47,-366.1	0/0:-1.92,-31.91,-558.5	0/0:-1.32,-12.04,-189.9	0/0:-0.6,-7.22,-123.8	0/0:-0.65,-12.04,-171.6	0/0:-0,-9.03,-160.1	0/0:-1.58,-36.73,-632.6	0/0:-0.81,-15.05,-233.7	0/0:-1.95,-37.93,-645.2	0/1:-22.7,-6.02,-86	0/0:-1.08,-9.63,-143	0/0:-1.08,-7.83,-95.7	0/0:-1.26,-21.07,-337	0/0:-1.46,-16.26,-273.9	0/0:-1.99,-31.31,-519.81	0/0:-0.88,-27.69,-481.8	0/0:-5.28,-30.71,-506.9	0/0:-0.67,-29.5,-531.1	0/0:-1.31,-9.63,-130.4	0/0:-1.09,-45.15,-803.7	0/0:-1.29,-20.47,-323.5	0/0:-2.15,-43.95,-792.6	0/0:-0.12,-16.26,-276.6	0/0:-0.7,-14.45,-221	0/0:-0.8,-22.28,-350.5	0/0:-0.66,-12.64,-209.7
chr10	25169235	A	<INS:ME:Bov-A2>	PASS	TSD=null;ASSESS=4;INTERNAL=XR_003036790.1,TERMINATOR;SVTYPE=Bov-A2;SVLEN=267;MEINFO=Bov-A2,1,268,-;DIFF=0.99:g55a,g88a,a91g,a94g,a102c,d115-120,g200a,g231a;LP=19;RP=19;RA=0;PRIOR=false;SR=4	0/0:-1.16,-45.76,-795.3	0/0:-0.91,-19.87,-282.4	0/0:-0.19,-33.72,-617.1	0/1:-55.9,-13.25,-166.24	0/0:-0.24,-31.31,-528.4	0/0:-1.01,-34.32,-577.6	0/0:-0.34,-47.56,-809.7	0/0:-0.04,-27.69,-493.3	0/0:-0.08,-48.77,-864.5	0/0:-0.12,-26.49,-456.6	0/0:-0.83,-50.57,-895.4	0/0:-1.42,-35.52,-529.1	0/0:-0.03,-28.9,-482	0/0:-0.24,-36.73,-629.1	0/0:-0.69,-25.89,-373.8	0/0:-1.21,-20.47,-320.9	0/0:-0.6,-28.3,-469.1	0/0:-0.71,-11.44,-192	0/0:-0.22,-39.13,-669	0/0:-0.19,-30.71,-508.7	0/0:-0.53,-36.73,-651.1	0/0:-0.01,-13.25,-232.4	0/0:-0.02,-5.42,-92.8	0/0:-1.29,-31.31,-467.8	0/0:-1.01,-18.06,-259.1	0/0:-0.94,-29.5,-482.8	0/0:-0.66,-31.91,-565.9	0/0:-1.15,-37.33,-661.5	0/0:-0.07,-40.94,-720.9	0/0:-0.04,-34.92,-624.2	0/0:-1.17,-40.34,-589.1	0/0:-0.24,-36.12,-605.5	0/0:-0.24,-45.76,-807.4	0/0:-1.86,-33.11,-534.81	0/0:-0.63,-12.04,-188.5	0/0:-0.52,-31.31,-529.8	0/0:-0.58,-34.92,-601.8	0/0:-0,-14.45,-271.7
chr10	25213342	G	<INS:ME:Bov-A2>	PASS	TSD=null;ASSESS=4;INTERNAL=null,null;SVTYPE=Bov-A2;SVLEN=268;MEINFO=Bov-A2,1,269,+;DIFF=0.98:c54t,c111t,a118g,g151c,c197t,g219a,g231a,c240t,c255t,n265-269;LP=150;RP=116;RA=0.371;PRIOR=false;SR=12	0/0:-0.07,-22.88,-369.6	0/1:-105.28,-16.26,-90.22	0/1:-108.91,-28.3,-359.5	0/1:-65.63,-15.65,-146.9	0/1:-28.83,-23.48,-318.72	0/1:-69.56,-20.47,-218.54	0/1:-100.45,-23.48,-208.27	0/0:-0.62,-16.26,-248	0/1:-48.19,-22.88,-267.72	0/1:-76.08,-23.48,-219.35	0/0:-0.8,-16.86,-246.3	0/1:-57.92,-22.88,-213.74	0/0:-2.62,-19.27,-269.01	0/1:-47.45,-24.08,-284.98	0/1:-32.54,-15.05,-182.17	0/1:-26,-13.85,-155.74	0/1:-77.87,-24.08,-296.53	0/1:-31.3,-10.24,-131.61	0/1:-40.83,-20.47,-273.94	0/1:-48.41,-13.25,-139.26	0/0:-0.08,-22.88,-384	0/1:-21.81,-12.04,-110.28	0/1:-61.2,-12.04,-105.85	0/1:-38.49,-18.66,-211.73	0/1:-58.99,-15.65,-162.48	0/1:-41.16,-19.27,-213.52	0/1:-61,-21.07,-321.87	0/1:-43.48,-19.27,-226.11	0/1:-32.32,-24.68,-340.11	0/1:-29.43,-20.47,-256.44	0/1:-40.66,-23.48,-295.93	0/1:-68.67,-25.89,-325.81	0/1:-84.5,-19.87,-178.23	0/1:-40.4,-20.47,-289.33	0/1:-57.08,-23.48,-314.91	0/0:-1.82,-16.86,-260.71	0/1:-25.9,-16.26,-230.74	0/1:-32.22,-10.24,-115.53
chr10	25267541	A	<INS:ME:Bov-A2>	PASS	TSD=dTTAAAAA;ASSESS=5;INTERNAL=XM_002690588.4,TERMINATOR;SVTYPE=Bov-A2;SVLEN=267;MEINFO=Bov-A2,1,268,+;DIFF=1:c19t,g39a,c63t,g69a,c89a,c97t,g112t,c197t,c218a,g241a;LP=54;RP=38;RA=0.507;PRIOR=false;SR=23	0/0:-0,-33.72,-670	0/0:-0,-27.09,-540	0/0:-0.6,-52.98,-1038	0/0:-0,-10.24,-198	0/0:-0,-45.15,-895.4	0/0:-0,-49.97,-992	0/0:-0,-46.36,-919.4	0/0:-0,-32.51,-645.9	0/0:-2.41,-44.55,-838.91	0/0:-0,-37.93,-756	0/0:-0,-31.31,-615	0/0:-0,-30.1,-598	0/0:-1.81,-28.3,-525.81	0/0:-0,-33.11,-660	0/0:-0,-24.08,-480	0/0:-0,-21.07,-420	0/0:-0.03,-30.71,-596.6	0/0:-0,-13.25,-262	0/0:-0,-31.31,-621.9	0/1:-78,-28.3,-480	0/0:-0,-27.09,-540	0/1:-46.5,-15.05,-240.17	0/0:-0,-12.64,-250	0/0:-3.01,-33.11,-600.81	0/1:-132,-34.92,-552	0/0:-3.01,-29.5,-531.01	0/0:-0,-30.71,-612	0/0:-2.41,-34.32,-638.41	0/0:-4.21,-46.96,-850.91	0/0:-2.41,-39.74,-740.61	0/0:-0.02,-33.72,-660.7	0/0:-0,-54.79,-1092	0/0:-0,-41.54,-822	0/0:-0,-34.92,-694	0/0:-0,-21.07,-414	0/0:-0,-15.05,-290.3	0/0:-1.81,-24.08,-439.81	0/0:-0,-26.49,-526
chr10	25331243	T	<INS:ME:Bov-A2>	PASS	TSD=GATGGCCAGACTT;ASSESS=5;INTERNAL=XR_003036792.1,3_UTR;SVTYPE=Bov-A2;SVLEN=269;MEINFO=Bov-A2,0,269,-;DIFF=0.99:c20t,a41g,c47t,c48g,t77a,t81c,c87t,t90g,g99c,g112a,a131c,c168t,g204a,c218t,c246a,n268-269;LP=264;RP=39;RA=2.759;PRIOR=false;SR=161	0/0:-0.03,-19.87,-329.2	0/1:-128.32,-23.48,-127.27	0/1:-78.35,-27.09,-338.54	0/1:-88.6,-12.64,-73.57	0/1:-55.51,-24.08,-319.95	0/1:-116.76,-34.92,-391.75	0/1:-135.07,-45.15,-534.87	0/1:-51.02,-21.07,-268.05	0/1:-133.97,-27.69,-229.68	0/1:-189.67,-39.13,-316.69	0/0:-0.14,-19.27,-299.8	0/1:-57.72,-18.66,-176.46	0/1:-42.97,-12.64,-118.69	0/1:-97.29,-28.9,-318.26	0/0:-2.8,-12.64,-163	0/1:-29.54,-13.25,-150.65	0/1:-99.85,-19.87,-188.33	0/1:-52.51,-16.26,-189.82	0/1:-57.22,-22.88,-274.46	0/1:-98.33,-18.66,-129.17	0/0:-0,-22.88,-398	0/1:-78.41,-16.86,-100.47	0/1:-47.7,-11.44,-117.95	0/1:-53.7,-16.26,-132.24	0/1:-86.56,-18.66,-115.05	0/1:-84.09,-18.06,-124.64	0/1:-72.24,-26.49,-306.23	0/1:-147.02,-25.89,-172.39	0/1:-71.53,-18.06,-185.93	0/1:-47.46,-21.07,-274.52	0/1:-118.24,-25.29,-206.16	0/1:-84.19,-24.68,-247.14	0/1:-96.44,-23.48,-219.31	0/0:-3.77,-27.69,-393.51	0/1:-44.9,-13.85,-157.49	0/0:-1.6,-15.05,-217.8	0/1:-61.22,-25.29,-286.55	0/1:-59.71,-15.05,-149.44
chr10	25338817	C	<INS:ME:Bov-A2>	PASS	TSD=null;ASSESS=3;INTERNAL=XR_003036792.1,PROMOTER;SVTYPE=Bov-A2;SVLEN=267;MEINFO=Bov-A2,1,268,+;DIFF=1:c74t,a75g,c87t,a92g,g110a,a149g,c197t,g219a,g231t,c240t,c246t,c266t;LP=4;RP=36;RA=-3.17;PRIOR=false;SR=8	0/0:-0.6,-9.03,-157.4	0/0:-1.54,-15.05,-219.6	0/0:-1.29,-13.25,-221.1	0/1:-10.43,-8.43,-114.97	0/0:-1.38,-8.43,-137.4	0/0:-1.23,-8.43,-111.9	0/1:-34.03,-13.85,-170.11	0/0:-0.75,-12.04,-200.7	0/1:-48.36,-15.05,-167.3	0/1:-35.2,-6.02,-25.23	0/0:-1.81,-13.85,-222.11	0/1:-28.08,-6.62,-44.51	0/0:-0.14,-25.29,-435	0/1:-28,-12.64,-184.12	0/0:-1.2,-7.83,-125.3	0/0:-0.6,-1.81,-24.6	0/0:-1.73,-12.64,-203.7	0/0:-0.73,-16.26,-276.1	0/0:-0.65,-6.02,-88.7	0/0:-0.65,-7.22,-110.6	0/1:-46.73,-10.84,-126.6	0/0:-0.61,-9.03,-153.6	0/0:-1.51,-11.44,-173.8	0/0:-0.6,-6.02,-92.4	0/0:-0.51,-15.65,-226.5	0/0:-0.84,-17.46,-266	0/0:-1.21,-10.24,-163	0/1:-28.39,-16.86,-222.25	0/0:-0.38,-12.04,-197.3	0/0:-2.85,-14.45,-221.1	0/1:-17.32,-7.83,-86.42	0/1:-30.79,-9.03,-97.4	0/0:-1.26,-15.65,-247.9	0/0:-0.89,-10.24,-156.4	0/0:-4.14,-14.45,-186.01	0/0:-0.92,-6.62,-91.9	0/1:-36.28,-12.64,-159.51	0/0:-0.89,-10.24,-170.3
chr10	26634784	T	<INS:ME:Bov-A2>	PASS	TSD=AAAATAGAGT;ASSESS=5;INTERNAL=XR_003036598.1,INTRONIC;SVTYPE=Bov-A2;SVLEN=266;MEINFO=Bov-A2,2,268,-;DIFF=0.99:n1,a6g,c17a,g55a,a60g,c87g,a92g,g108t,a109c,g110a,g112c,i115t,n198,g199a,g202c,c244t,c266t;LP=78;RP=112;RA=-0.522;PRIOR=false;SR=14	0/0:-0,-15.65,-282.1	0/1:-17.53,-12.04,-161.22	0/0:-0.01,-6.62,-116.7	0/0:-0,-10.84,-206.5	0/1:-37.7,-12.64,-154.11	0/1:-42.9,-19.27,-267.37	0/1:-52.9,-18.06,-216.23	0/0:-0,-10.24,-191.5	0/1:-80.6,-19.87,-218.85	0/0:-0.01,-10.24,-166.8	0/0:-0,-12.64,-238.4	0/1:-69.52,-20.47,-258.02	0/0:-0.61,-15.65,-230.7	0/1:-51,-19.87,-278.99	0/0:-0.09,-6.62,-117.7	0/0:-0,-8.43,-157.8	0/1:-93.93,-19.27,-181.51	0/0:-0,-6.02,-106.2	0/1:-33.5,-17.46,-256.04	0/1:-55.8,-12.04,-121.65	0/0:-0,-10.24,-191.2	0/0:-0,-3.01,-46.6	0/0:-0.01,-12.04,-203.1	0/1:-29.28,-8.43,-63.21	0/1:-84.25,-19.27,-190.64	0/1:-62.08,-18.66,-238.59	0/0:-0,-11.44,-213.1	0/1:-60,-20.47,-252.94	0/1:-58.93,-15.05,-113.79	0/0:-0,-10.84,-204	0/1:-69.1,-19.27,-242.01	0/0:-0.6,-12.04,-217.3	0/1:-36.13,-13.85,-175.42	0/0:-0,-9.63,-167	0/0:-0,-15.05,-284.5	0/0:-0,-10.24,-191.6	0/0:-0,-4.21,-84	0/0:-0.03,-7.83,-132
chr10	26865782	T	<INS:ME:Bov-A2>	PASS	TSD=null;ASSESS=4;INTERNAL=XM_002690662.3,PROMOTER;SVTYPE=Bov-A2;SVLEN=267;MEINFO=Bov-A2,1,268,-;DIFF=0.94:c54t,c97t,c106g,g198a,g200a,g236t,c240t,g241a,c255t,n265-269;LP=8;RP=11;RA=-0.459;PRIOR=false;SR=5	0/0:-0,-22.88,-455.8	0/0:-0,-15.65,-312	0/0:-0,-13.85,-272.6	0/1:-24,-3.01,-36	0/0:-0,-21.07,-415.8	0/0:-0.6,-24.68,-475.6	0/0:-0,-9.63,-190	0/0:-0,-15.65,-310.4	0/0:-0,-18.66,-368.1	0/0:-0,-9.03,-180	0/0:-0,-12.04,-240	0/0:-0,-7.83,-156	0/0:-0,-13.85,-272	0/0:-0,-9.63,-192	0/0:-0,-16.86,-336	0/0:-0,-9.03,-180	0/0:-0.6,-4.21,-72.6	0/0:-0,-4.21,-82	0/0:-0,-21.67,-429	0/0:-0,-12.04,-238.6	0/0:-1.2,-18.66,-348.9	0/0:-0,-5.42,-108	0/0:-0,-8.43,-168	0/0:-0,-6.62,-130.4	0/0:-0,-3.61,-72	0/0:-0.6,-10.84,-204.6	0/0:-0,-10.24,-204	0/0:-0,-18.66,-370	0/0:-0,-18.66,-365.9	0/0:-0,-12.64,-250.5	0/0:-0,-12.64,-252	0/0:-0,-15.05,-300	0/0:-0,-18.06,-358	0/0:-0,-12.64,-251.2	0/0:-0,-9.03,-180	0/1:-24,-2.41,-24	0/0:-0.6,-7.22,-132.6	0/0:-0,-6.02,-120
chr10	26873519	T	<INS:ME:Bov-A2>	PASS	TSD=CACAATGGAATGTT;ASSESS=5;INTERNAL=XR_003036955.1,PROMOTER;SVTYPE=Bov-A2;SVLEN=267;MEINFO=Bov-A2,1,268,-;DIFF=0.98:g4a,c30t,c37t,c54t,a68g,t77a,i82g,g88t,t90g,d100-103,a131c,t215c,g219a,g251a;LP=208;RP=263;RA=-0.338;PRIOR=false;SR=113	1/1:-212.8,-13.25,-1.21	1/1:-230.2,-15.65,-1.33	0/0:-0,-14.45,-288	0/1:-104,-10.24,-84	0/1:-85.5,-12.04,-132	0/1:-143.4,-14.45,-120	0/0:-0,-13.85,-276	1/1:-196.8,-12.64,-1.2	1/1:-263.51,-17.46,-1.81	0/0:-0,-6.02,-120	0/1:-107.8,-17.46,-216.01	0/1:-80.5,-6.02,-20.3	0/1:-186.78,-16.26,-57.11	0/1:-104.7,-13.85,-144	0/1:-126.77,-10.24,-25.35	0/0:-0,-4.21,-84	0/0:-0,-6.02,-120	1/1:-155.4,-9.63,-0.6	0/1:-176.7,-19.87,-191.2	0/1:-90,-13.25,-154.1	0/0:-0,-9.03,-180	0/1:-73.87,-10.24,-97.8	1/1:-160.4,-10.84,-1.2	0/1:-96.9,-13.85,-151.73	0/1:-65.2,-7.83,-72	0/1:-114.7,-13.85,-132.08	1/1:-245.2,-15.05,-1.2	0/1:-84,-9.03,-84	0/1:-84.4,-10.24,-108	0/1:-28.9,-8.43,-132	1/1:-160.6,-11.44,-1.21	1/1:-227.71,-15.65,-1.84	0/1:-174.4,-12.04,-36	0/0:-0,-9.63,-192	1/1:-208.81,-13.85,-1.81	0/0:-0,-9.63,-190	0/1:-120,-12.04,-96	1/1:-85.4,-5.42,-0.6
chr10	27076179	G	<INS:ME:Bov-A2>	PASS	TSD=null;ASSESS=3;INTERNAL=XM_024998215.1,PROMOTER;SVTYPE=Bov-A2;SVLEN=269;MEINFO=Bov-A2,0,269,-;DIFF=0.92:n1-2,c17a,d50-66,n68,i126t,c180t,g219a,a223c,n234,c266t,n269;LP=119;RP=48;RA=1.31;PRIOR=false;SR=28	0/1:-43.1,-7.22,-75.62	0/0:-0,-10.84,-188.4	0/1:-49.1,-5.42,-28.7	0/0:-0.22,-9.63,-173.2	1/1:-141.5,-9.63,-0.6	0/1:-43.9,-11.44,-160	0/0:-0.02,-15.05,-276.7	0/1:-35.7,-6.02,-61.1	0/1:-40.4,-10.24,-133.5	0/1:-36.28,-7.22,-47.07	0/1:-37.1,-9.03,-112.01	0/1:-31.32,-4.82,-26.9	0/1:-32.58,-9.03,-92.62	0/0:-0.43,-9.63,-184	0/0:-0,-9.63,-175.3	0/0:-0.17,-10.84,-193.5	1/1:-96.7,-6.02,-0	0/0:-0,-11.44,-226.4	0/0:-0,-10.84,-204.2	0/0:-0,-3.61,-68.8	0/1:-50.9,-9.63,-128.9	0/0:-0,-7.22,-138	0/0:-0,-8.43,-163.8	0/0:-0,-7.83,-139.4	1/1:-30.9,-2.41,-0.03	0/1:-22.5,-7.22,-98.03	1/1:-116.2,-8.43,-0.61	0/0:-0.1,-13.25,-249.4	1/1:-134.2,-10.24,-1.29	0/1:-104.02,-9.63,-32.27	0/1:-49.4,-6.62,-34.33	0/0:-0,-12.64,-246.5	0/0:-0,-8.43,-164.7	1/1:-100,-7.22,-0.4	0/0:-0,-6.62,-123.7	0/1:-35.3,-3.61,-22	0/0:-0,-10.84,-206.1	0/0:-0,-9.03,-174.3
chr10	27334010	C	<INS:ME:Bov-A2>	PASS	TSD=GCACTCC;ASSESS=5;INTERNAL=null,null;SVTYPE=Bov-A2;SVLEN=267;MEINFO=Bov-A2,1,268,-;DIFF=0.97:a6t,c20t,c32g,t38c,g55a,g58a,g98a,c103t,c111t,t129c,t181c,g193t,g200a,g202a,g204a,g211a,c218a,t222c,g256a;LP=256;RP=302;RA=-0.238;PRIOR=false;SR=160	1/1:-255.4,-15.65,-0.6	0/1:-264,-20.47,-74.5	1/1:-222.1,-13.85,-0.6	0/0:-0,-9.63,-192	0/1:-86.9,-11.44,-132	0/1:-250.7,-16.86,-42.9	0/0:-0,-13.25,-264	1/1:-331.2,-19.87,-0.6	0/0:-0,-14.45,-288	0/1:-229.2,-17.46,-62	0/1:-144.4,-15.65,-140	0/0:-0,-9.63,-192	0/1:-318.7,-21.67,-51.7	0/1:-127.2,-12.04,-96	0/1:-121.9,-15.65,-163.8	0/1:-183.3,-13.25,-40	0/1:-192,-15.65,-96	0/1:-220,-15.05,-42	0/1:-153.3,-15.05,-120.02	0/1:-114,-10.84,-84	1/1:-175.1,-11.44,-1.2	1/1:-127.2,-8.43,-1.2	1/1:-239.1,-15.05,-1.21	0/0:-0,-14.45,-288	0/1:-154,-11.44,-38.8	0/1:-108,-14.45,-154	1/1:-161.2,-10.24,-1.2	1/1:-203.5,-12.64,-1.2	0/1:-172.2,-18.06,-156	1/1:-243.7,-15.65,-1.21	0/1:-167.2,-16.86,-110	1/1:-296.8,-17.46,-0	1/1:-313.9,-18.06,-0	0/0:-0,-10.24,-197.6	0/1:-132,-13.85,-120	0/1:-60.06,-6.62,-52.9	0/1:-94,-9.03,-72	0/1:-101.2,-10.24,-84
chr10	27335777	T	<INS:ME:Bov-A2>	PASS	TSD=GCTTT;ASSESS=5;INTERNAL=null,null;SVTYPE=Bov-A2;SVLEN=267;MEINFO=Bov-A2,1,268,+;DIFF=1:a10g,c37t,g51t,c54t,g73a,c132t,a148g,g198c,t239c,g256a,a257c;LP=160;RP=235;RA=-0.555;PRIOR=false;SR=122	1/1:-161.6,-10.84,-0.73	1/1:-127.2,-9.63,-0.85	1/1:-123.4,-8.43,-0.6	0/0:-0,-7.83,-156	0/1:-95,-13.25,-144.01	0/1:-126.45,-9.63,-27.18	0/0:-0,-7.22,-144	1/1:-92.6,-6.02,-0.6	0/0:-0,-14.45,-288	0/1:-189.2,-13.85,-36.83	0/1:-89.5,-15.65,-204	0/0:-0,-12.04,-238.7	1/1:-192.8,-14.45,-1.22	0/1:-169.01,-15.65,-103.8	0/1:-58.8,-11.44,-143.8	0/1:-42,-3.61,-16.9	0/1:-84.6,-10.84,-108.06	1/1:-83,-6.02,-0.19	0/1:-75.03,-15.65,-196.74	0/1:-118.3,-9.63,-60	1/1:-177.7,-12.64,-1.29	1/1:-53.7,-4.21,-0.9	0/1:-139.2,-10.84,-30.09	0/0:-0,-9.63,-190	0/1:-112.4,-9.63,-26.01	0/1:-51.8,-9.03,-108	1/1:-138.4,-9.03,-0.6	1/1:-192.2,-12.04,-0	0/1:-77.3,-13.85,-161.65	1/1:-158.1,-9.63,-0	0/1:-105.51,-9.03,-29.71	1/1:-201.8,-13.25,-0.91	1/1:-145.7,-9.63,-0.7	0/0:-0,-12.64,-252	0/1:-163.5,-14.45,-94	0/1:-53.1,-6.02,-58	0/1:-38,-8.43,-106.28	0/1:-94.8,-11.44,-108.22
chr10	27670940	T	<INS:ME:Bov-A2>	PASS	TSD=null;ASSESS=4;INTERNAL=XM_002690701.3,TERMINATOR;SVTYPE=Bov-A2;SVLEN=254;MEINFO=Bov-A2,15,269,+;DIFF=0.75:n1-15,a41g,t50g,g55a,a68g,g73t,a75c,c79t,t90a,a91c,t96g,c97t,a102g,n117-142,g172a,t173c,a184g,g185a,g198a,g200a,g216t,c218t,a253t;LP=192;RP=163;RA=0.236;PRIOR=false;SR=68	0/0:-0,-9.03,-178	0/0:-0,-9.03,-180	0/0:-0,-15.05,-300	0/1:-53.5,-5.42,-32.73	0/0:-0.17,-7.83,-146.5	0/1:-182.71,-24.08,-242.6	0/0:-0,-7.22,-144	0/1:-189.24,-25.89,-238.4	0/1:-410.36,-48.16,-399.85	0/0:-0,-13.25,-264	0/0:-0,-12.64,-252	0/1:-87.1,-7.22,-34.27	0/0:-0,-7.83,-156	0/1:-62.08,-13.25,-181.3	0/1:-32.5,-10.24,-152.3	0/0:-0,-6.62,-131.6	0/1:-165.5,-12.04,-30.71	0/1:-58.6,-7.83,-82.05	0/0:-0,-13.25,-262	0/1:-97.1,-9.63,-72.73	0/1:-65.65,-21.07,-325.02	0/0:-0,-4.21,-83	1/1:-69.3,-4.82,-0.68	0/1:-39.11,-9.03,-123.5	0/1:-82.95,-17.46,-216.65	0/0:-0.63,-9.63,-172.8	0/0:-0,-9.03,-179.7	0/1:-178.28,-22.28,-208.9	0/1:-32,-9.03,-142	0/0:-0,-11.44,-228	0/1:-261.94,-24.68,-114.8	0/1:-242.67,-27.09,-212.08	0/1:-200.47,-27.09,-255.04	0/1:-132,-24.08,-314.4	0/0:-0,-5.42,-108	0/1:-32.07,-7.22,-100.8	0/0:-0,-9.63,-192	0/0:-0,-4.82,-96
chr10	29225504	A	<INS:ME:Bov-A2>	PASS	TSD=TTCACTTTCA;ASSESS=5;INTERNAL=XM_015473104.2,INTRONIC;SVTYPE=Bov-A2;SVLEN=267;MEINFO=Bov-A2,1,268,+;DIFF=0.96:c17a,c54t,a68g,a91g,a94g,c97t,g182a,c197t,g219a,g231c,g247a,c255t;LP=27;RP=25;RA=0.111;PRIOR=false;SR=16	0/0:-0.2,-15.65,-275.3	0/0:-0,-4.21,-68.9	0/0:-0,-13.85,-265.8	0/0:-0.32,-8.43,-140.3	0/0:-0,-5.42,-100	0/0:-0.61,-10.24,-184.3	0/0:-0,-13.25,-257	0/0:-0.17,-11.44,-207.2	0/0:-0,-11.44,-217.6	0/0:-0.01,-10.84,-185	0/0:-0.15,-13.85,-248.9	0/0:-0.47,-3.01,-39.6	0/0:-0,-16.86,-329.9	0/1:-27.93,-13.25,-202.41	0/0:-0.69,-7.22,-127.5	0/0:-0,-1.81,-24.6	0/0:-0.01,-7.83,-131.8	0/0:-0.04,-9.03,-157.4	0/0:-0,-10.24,-182.9	0/0:-0.16,-9.03,-156.4	0/0:-0,-9.63,-179.9	0/0:-0.25,-2.41,-30.8	0/0:-0.13,-9.63,-173.3	0/0:-0.13,-5.42,-88.4	0/0:-0.26,-8.43,-130.1	0/0:-0.09,-7.83,-118.9	0/0:-0.61,-8.43,-136	0/0:-0.04,-10.84,-190.6	0/0:-0.01,-11.44,-201.1	0/0:-0.01,-10.24,-181.8	0/0:-0,-10.84,-188.8	0/0:-0.01,-11.44,-198	0/0:-0.13,-11.44,-197.7	0/0:-0.13,-10.84,-185.9	0/0:-0.04,-13.25,-231	0/0:-0.03,-6.62,-121.2	0/0:-0.01,-8.43,-148.8	0/0:-0.07,-9.63,-170
chr10	34288793	C	<INS:ME:Bov-A2>	PASS	TSD=ACTCCAGTAC;ASSESS=5;INTERNAL=XR_809233.3,INTRONIC;SVTYPE=Bov-A2;SVLEN=267;MEINFO=Bov-A2,1,268,-;DIFF=0.46:c9a,c17a,c18t,c19t,c32a,g55a,d91,g112a,t120g,n126-269;LP=17;RP=21;RA=-0.305;PRIOR=false;SR=35	0/0:-0.27,-12.04,-191.9	0/0:-0,-10.84,-212	0/0:-0.18,-11.44,-183.9	0/0:-0,-10.84,-207.6	0/0:-0.13,-9.63,-177.3	0/1:-34.3,-10.84,-140	0/0:-1.22,-10.24,-156.6	0/0:-0.06,-10.24,-184.8	0/0:-0.21,-12.04,-206.6	0/0:-0,-8.43,-165.7	0/0:-0.03,-11.44,-211.6	0/0:-0.6,-5.42,-91	0/0:-0,-10.84,-208.9	0/0:-0.76,-12.64,-215	0/0:-0.05,-10.24,-164.3	0/0:-0,-5.42,-107.2	0/0:-0.03,-4.82,-84.2	0/0:-0.15,-7.22,-126.4	0/0:-1.25,-12.04,-194	0/0:-0.73,-6.62,-113.2	0/0:-0.19,-10.84,-185.4	0/0:-0,-4.21,-67	0/0:-0.73,-9.03,-150.7	0/0:-0.74,-6.62,-95.9	0/0:-0,-8.43,-155.4	0/0:-0.6,-13.25,-230.9	0/0:-0.84,-11.44,-207.6	0/0:-0.6,-10.24,-190.3	0/0:-0.42,-8.43,-132.9	0/0:-0.11,-12.04,-214.8	0/0:-0,-11.44,-214.1	0/0:-0.89,-10.24,-155.3	0/0:-0.77,-9.03,-136.2	0/0:-0.21,-8.43,-135.3	0/0:-1.23,-10.24,-174.4	0/0:-0.04,-4.21,-66.4	0/0:-0.07,-8.43,-139.6	0/0:-0.19,-10.84,-188.4
chr10	35059886	C	<INS:ME:Bov-A2>	PASS	TSD=0tsd;ASSESS=5;INTERNAL=XR_003036957.1,INTRONIC;SVTYPE=Bov-A2;SVLEN=267;MEINFO=Bov-A2,1,268,-;DIFF=0.45:c9a,c17a,c54t,c63a,g73a,t90a,g112a,n121-142,g172a,t173c,n179-269;LP=31;RP=19;RA=0.706;PRIOR=false;SR=15	0/0:-0,-10.24,-195.8	0/0:-0.6,-14.45,-252.6	0/0:-0.04,-11.44,-207.2	0/0:-0,-10.24,-194.5	0/0:-0,-7.22,-142.4	0/0:-0,-14.45,-288	0/0:-0,-6.62,-132	0/0:-0,-10.84,-216	0/0:-0,-13.25,-260.8	0/0:-0,-7.83,-137.8	0/0:-0,-11.44,-228	0/0:-0,-7.83,-154	0/0:-0,-15.65,-310	0/0:-0,-10.24,-204	0/0:-0.6,-5.42,-90.6	0/0:-0,-8.43,-167.2	0/0:-0,-9.03,-180	0/0:-0.01,-6.62,-123.7	0/0:-0,-13.85,-276	0/0:-0,-10.24,-204	0/0:-0,-8.43,-168	0/0:-0,-6.62,-131.5	0/0:-0,-11.44,-228	0/1:-20,-3.61,-44	0/0:-1.2,-9.63,-167.2	0/0:-1.2,-10.24,-164.2	0/0:-0,-10.84,-201	0/0:-0,-10.24,-204	0/0:-0,-13.85,-276	0/0:-0.03,-11.44,-211.5	0/0:-0,-7.83,-146	0/0:-0.6,-9.03,-168.6	0/0:-0,-15.65,-312	0/0:-0,-6.02,-114	0/0:-0,-10.24,-204	0/0:-0.6,-13.85,-240.8	0/0:-0,-17.46,-348	0/0:-0,-7.83,-156
chr10	37033558	T	<INS:ME:Bov-A2>	PASS	TSD=TGATGTTCTTTTGT;ASSESS=5;INTERNAL=XM_024997621.1,INTRONIC;SVTYPE=Bov-A2;SVLEN=269;MEINFO=Bov-A2,0,269,-;DIFF=0.4:c9a,c17a,g55a,g88a,c89t,t90a,g108a,c111t,n122-269;LP=1;RP=6;RA=-2.585;PRIOR=false;SR=4	0/0:-0,-7.83,-154	0/0:-0,-6.62,-132	0/0:-0,-14.45,-288	0/0:-0,-12.04,-240	0/0:-0,-9.63,-192	0/0:-0,-13.25,-264	0/0:-0,-14.45,-288	0/0:-0.6,-14.45,-276.6	0/0:-0,-12.64,-252	0/0:-0,-6.62,-132	0/0:-0,-15.05,-300	0/0:-0,-7.22,-144	0/0:-0,-16.86,-336	0/0:-0,-10.24,-204	0/0:-0,-12.04,-240	0/0:-0,-7.22,-140.1	0/0:-0,-9.03,-180	0/0:-0,-6.62,-132	0/0:-0,-12.64,-252	0/0:-0,-9.63,-192	0/0:-0,-9.63,-192	0/0:-0,-4.21,-84	0/0:-0,-10.24,-204	0/0:-0,-9.63,-190	0/0:-0,-8.43,-168	0/0:-0,-10.24,-204	0/0:-0,-10.24,-200	0/0:-0,-11.44,-228	0/1:-34,-12.04,-200	0/0:-0,-12.04,-240	0/0:-0,-12.64,-252	0/0:-0,-11.44,-228	0/0:-0,-13.85,-276	0/0:-0,-10.24,-204	0/0:-0,-8.43,-168	0/0:-0,-8.43,-168	0/0:-0,-9.63,-192	0/0:-0,-7.83,-156
chr10	42133480	G	<INS:ME:Bov-A2>	PASS	TSD=GAAGGTTTTGCTG;ASSESS=5;INTERNAL=null,null;SVTYPE=Bov-A2;SVLEN=267;MEINFO=Bov-A2,1,268,+;DIFF=1:c17a,a60g,i64t,a68g,c87t,a92g,c97t,a137g,c162a,g185a,g228a,c230t;LP=7;RP=9;RA=-0.363;PRIOR=false;SR=5	0/0:-0,-13.85,-274	0/0:-0,-11.44,-228	0/0:-0,-10.84,-214	0/1:-90,-9.03,-72	0/0:-0,-10.24,-204	0/0:-0,-8.43,-166	0/0:-0,-9.63,-192	0/0:-0,-11.44,-228	0/0:-0,-11.44,-228	0/0:-0,-5.42,-108	0/0:-0,-16.26,-322	0/0:-0,-11.44,-228	0/0:-0,-16.26,-321.8	0/0:-0,-13.25,-264	0/0:-0,-13.85,-276	0/0:-0,-7.22,-144	0/1:-42,-6.02,-72	0/0:-0,-7.22,-144	0/0:-0,-14.45,-288	0/0:-0,-10.24,-204	0/0:-0,-12.64,-252	0/0:-0,-4.21,-84	0/0:-0,-8.43,-168	0/0:-0,-11.44,-228	0/0:-0,-9.03,-180	0/0:-0,-13.25,-264	0/0:-0,-12.04,-239.2	0/0:-0,-12.64,-252	0/0:-0.03,-9.03,-173.2	0/0:-0,-15.05,-300	0/0:-0,-6.02,-120	0/0:-0,-15.05,-297.3	0/0:-0,-9.63,-188.5	0/0:-0,-10.84,-216	0/0:-0,-12.04,-240	0/0:-0,-12.04,-240	0/0:-0,-7.83,-156	0/0:-0,-10.24,-204
chr10	42354290	A	<INS:ME:Bov-A2>	PASS	TSD=null;ASSESS=4;INTERNAL=null,null;SVTYPE=Bov-A2;SVLEN=267;MEINFO=Bov-A2,1,268,+;DIFF=0.86:c9a,c17a,c24t,a26t,c30t,g55a,a68g,g73a,g82a,g88t,t90a,g98a,c103t,n126,n139-142,c167t,a169t,g172a,g185a,g193t,g198a,g200a,g216a,c218a,t222c,g225a,g231t,c234a,n241-269;LP=90;RP=58;RA=0.634;PRIOR=false;SR=9	0/0:-1.67,-12.04,-190	0/0:-0,-6.02,-105	0/1:-105.1,-14.45,-157.51	0/0:-0,-4.21,-79.4	0/0:-0.69,-7.22,-128.4	0/0:-0,-12.64,-242.9	0/0:-0.01,-7.83,-141.9	0/0:-1.11,-14.45,-247	0/0:-0,-16.26,-324	0/0:-0,-4.21,-73.4	0/0:-0.01,-10.84,-197.5	0/0:-0,-3.01,-49.6	0/0:-0,-12.04,-232	0/0:-0.6,-9.63,-176.6	0/0:-0.6,-10.84,-194.8	0/0:-0,-4.82,-81.8	0/0:-0,-3.61,-68.5	0/0:-0,-10.84,-216	0/0:-1.41,-10.24,-155.7	0/0:-0.66,-6.02,-97.4	0/0:-0.7,-11.44,-186.6	0/0:-0,-4.82,-86.1	0/0:-0,-8.43,-157.5	0/0:-0.99,-5.42,-77.8	0/0:-0.13,-8.43,-152.7	0/0:-0,-9.03,-180	0/0:-1.2,-7.22,-109.7	0/1:-100.9,-10.24,-92.8	0/0:-0.08,-11.44,-210.4	0/0:-0,-3.61,-67.4	0/0:-0,-4.21,-73	0/0:-0.6,-9.63,-168	0/0:-1.89,-9.03,-137.8	0/0:-0.6,-10.84,-187	0/0:-0.29,-7.83,-118	0/0:-0.01,-7.22,-129.3	0/0:-1.64,-7.22,-98.6	0/0:-1.21,-8.43,-123.3
chr10	47347517	C	<INS:ME:Bov-A2>	PASS	TSD=TATTTATTGAC;ASSESS=5;INTERNAL=XM_024998001.1,INTRONIC;SVTYPE=Bov-A2;SVLEN=266;MEINFO=Bov-A2,2,268,+;DIFF=0.99:n1,c32t,g39a,g65a,n91,g98a,c103t,c111t,a169t,g185a,c197t,g202a;LP=152;RP=144;RA=0.078;PRIOR=false;SR=78	1/1:-323.2,-19.87,-1.21	0/1:-154,-18.06,-178	0/0:-0,-10.24,-204	0/1:-184,-16.26,-108	0/1:-158,-13.85,-96	0/1:-144,-19.27,-216	0/0:-0,-16.86,-336	0/0:-0,-13.85,-276	0/1:-217.9,-18.06,-108.01	0/0:-0,-7.22,-144	0/0:-0,-14.45,-288	1/1:-228.6,-13.85,-0.6	0/0:-0,-13.25,-264	0/0:-0,-12.04,-240	0/0:-0,-10.84,-216	0/0:-0,-6.62,-132	1/1:-220.6,-13.25,-0.6	1/1:-320,-18.66,-0	0/0:-0,-21.67,-432	0/0:-0,-10.24,-204	0/0:-0,-18.66,-372	0/0:-0,-3.01,-60	0/0:-0,-4.21,-84	0/1:-150,-10.84,-34	0/0:-0,-6.02,-120	0/1:-134,-13.85,-118	0/0:-0,-10.24,-201.8	0/0:-0,-18.06,-360	0/0:-0,-18.06,-360	0/0:-0,-11.44,-228	0/1:-348,-24.08,-64	0/1:-166,-14.45,-96	0/0:-0,-12.04,-240	0/0:-0,-10.84,-216	0/0:-0.6,-4.82,-84.6	1/1:-277.2,-17.46,-1.21	1/1:-232,-13.85,-0	0/0:-0,-3.61,-72
chr10	49946755	T	<INS:ME:Bov-A2>	PASS	TSD=CAGATACAAAT;ASSESS=5;INTERNAL=XR_001501180.1,INTRONIC;SVTYPE=Bov-A2;SVLEN=267;MEINFO=Bov-A2,1,268,-;DIFF=1:g73t,c97t,c123a,a124t,c125t,g198a,c246t;LP=58;RP=49;RA=0.243;PRIOR=false;SR=23	0/0:-0,-15.65,-312	0/0:-0,-5.42,-108	0/0:-0,-23.48,-462.7	0/0:-0,-3.61,-72	0/1:-176,-15.65,-108	0/0:-0,-13.25,-263	0/0:-0,-6.62,-132	0/0:-0,-13.85,-276	0/0:-0,-16.86,-336	0/0:-0,-7.22,-144	0/0:-0.01,-15.05,-295.8	0/1:-50,-9.03,-118	0/0:-0,-12.04,-240	0/0:-0,-16.26,-324	0/0:-0,-9.63,-191.4	0/0:-0,-6.02,-120	1/1:-170,-10.24,-0	0/0:-0,-3.01,-60	0/0:-0,-20.47,-408	0/0:-0,-10.24,-204	0/0:-0,-17.46,-348	0/0:-0,-4.21,-84	0/0:-0,-4.82,-96	0/1:-94,-12.64,-144	0/0:-0,-9.03,-180	1/1:-262.6,-16.26,-0.6	0/0:-0,-16.26,-324	0/0:-0,-13.25,-264	0/1:-132,-12.64,-96	0/0:-0,-13.85,-276	0/0:-0,-7.22,-144	0/0:-0,-15.65,-312	0/0:-0,-12.64,-252	0/0:-0,-10.84,-214.2	0/0:-0,-1.81,-36	0/0:-0,-6.62,-132	1/1:-210,-12.64,-0	0/0:-0,-9.63,-192
chr10	50290271	A	<INS:ME:Bov-A2>	PASS	TSD=AAAAAA;ASSESS=5;INTERNAL=null,null;SVTYPE=Bov-A2;SVLEN=264;MEINFO=Bov-A2,4,268,-;DIFF=0.72:n1-3,a49g,c54t,c97a,c125t,a141g,g231a,c249a,n265-269;LP=6;RP=2;RA=1.585;PRIOR=false;SR=10	0/0:-0,-12.04,-236.8	0/0:-0,-13.25,-244.5	0/0:-2.03,-14.45,-238.71	0/0:-0,-13.25,-260	0/0:-0,-7.22,-138.5	0/0:-0.68,-10.24,-164.8	0/1:-31.8,-9.63,-151.2	0/1:-38.6,-9.63,-142.1	0/1:-47.23,-15.65,-229.6	0/1:-84.6,-7.22,-38.6	0/0:-0.6,-7.22,-129.9	0/0:-0,-4.82,-84.5	0/1:-69.6,-10.84,-123.1	0/0:-0,-9.03,-177	0/1:-60.5,-4.82,-18.3	0/0:-0.6,-3.61,-59.3	0/0:-0,-6.62,-132	0/1:-70.71,-9.63,-96.16	0/0:-0,-10.84,-211.1	0/0:-0,-9.03,-180	0/1:-47,-11.44,-152.4	0/0:-0.1,-9.03,-154.1	0/0:-0,-12.04,-239.1	0/0:-0.69,-6.62,-120.1	0/1:-68.9,-7.22,-64.4	0/1:-54,-8.43,-95.8	0/1:-78.2,-9.63,-89	0/0:-0,-6.62,-128.7	0/0:-0.36,-16.26,-291.4	0/0:-0.6,-6.62,-115.9	0/1:-57.6,-10.84,-139.6	0/1:-28.15,-9.63,-140.02	0/0:-0,-14.45,-277.8	0/1:-43.26,-6.02,-64.9	0/0:-1.2,-9.63,-169.2	0/0:-1.2,-8.43,-138.1	0/0:-0,-12.64,-243.8	0/0:-1.21,-9.03,-148.8
chr10	50484791	T	<INS:ME:Bov-A2>	PASS	TSD=T;ASSESS=5;INTERNAL=null,null;SVTYPE=Bov-A2;SVLEN=267;MEINFO=Bov-A2,1,268,-;DIFF=0.45:c9a,c17a,c18t,t28c,g66a,g73a,g88a,d90,n91,n123-188,c197t,g202a,g231a,t239c,c240t,c246t,c255t,g265a;LP=48;RP=94;RA=-0.97;PRIOR=false;SR=58	0/0:-0,-12.04,-228.6	0/0:-1.2,-15.05,-271.2	0/0:-0.76,-19.87,-355.9	0/0:-0,-4.82,-90	0/1:-44,-11.44,-157.6	0/0:-0.6,-9.63,-166.6	0/0:-1.2,-15.65,-275.6	0/1:-50.5,-10.84,-140	0/0:-1.2,-11.44,-197.2	0/0:-0,-7.83,-154	0/0:-0.6,-9.63,-171	0/0:-0.03,-1.81,-27.2	0/0:-0.6,-16.86,-313.7	0/1:-49.8,-10.84,-145.71	0/0:-0,-9.63,-192	0/0:-0,-7.22,-133.7	0/0:-0,-4.82,-92	0/0:-0,-10.84,-200.7	0/0:-0,-10.84,-216	0/0:-1.2,-7.22,-105.5	0/0:-0.6,-16.86,-306.7	0/0:-0,-4.21,-84	0/0:-0.6,-11.44,-190.3	0/0:-0.6,-8.43,-147.3	0/0:-0.03,-10.24,-193.5	0/0:-0.6,-9.03,-147.1	0/0:-0,-8.43,-150.3	0/0:-0,-13.85,-260.3	0/0:-0,-14.45,-288	0/0:-0.6,-7.22,-121.6	0/0:-0,-9.03,-170	0/0:-0,-12.64,-248.4	0/0:-0,-7.22,-138	0/0:-0.03,-8.43,-151	0/0:-0,-10.24,-182.3	0/1:-18.4,-4.82,-62	0/0:-0.6,-10.84,-192.6	0/1:-18.5,-5.42,-82
chr10	50789209	A	<INS:ME:Bov-A2>	PASS	TSD=dAGA;ASSESS=5;INTERNAL=null,null;SVTYPE=Bov-A2;SVLEN=265;MEINFO=Bov-A2,3,268,-;DIFF=0.99:n1-2,g8a,c54t,t67a,g88a,g98a,c111t,a113c,a137c,a187c,c205t,g227a,c240t,a252c,c258t;LP=70;RP=91;RA=-0.379;PRIOR=false;SR=4	0/0:-0.6,-13.85,-257.6	0/1:-52.4,-10.24,-112.9	0/0:-0,-13.25,-263.4	0/0:-1.2,-12.64,-228.2	0/0:-0,-14.45,-288	0/0:-0.6,-12.64,-236.2	0/0:-0,-10.84,-216	0/0:-1.2,-18.06,-334.4	0/0:-0,-9.63,-192	0/0:-0,-7.83,-156	0/0:-0,-10.24,-202	0/0:-0,-12.64,-252	0/0:-0,-17.46,-341.7	0/0:-0,-18.06,-360	0/0:-0,-9.63,-192	0/0:-0,-6.02,-118	0/0:-1.81,-13.85,-236.41	0/0:-0,-10.84,-216	0/0:-0,-16.86,-335.4	0/1:-85.7,-11.44,-116.5	0/0:-1.22,-12.04,-210.4	0/1:-30.81,-8.43,-105.12	0/0:-0,-10.24,-204	0/0:-0.6,-14.45,-274.6	0/0:-1.33,-13.25,-228.4	0/0:-0,-13.85,-266.5	0/0:-0,-12.04,-240	0/1:-53.5,-12.64,-170.5	0/1:-42.1,-9.63,-129.9	0/0:-0,-11.44,-224	0/0:-2.03,-14.45,-243.51	0/1:-29.3,-12.64,-207.6	0/0:-1.2,-11.44,-202.4	0/0:-0,-13.85,-276	0/0:-1.2,-10.24,-178	0/1:-97,-9.63,-72	0/0:-0,-6.02,-120	0/0:-0,-4.82,-96
chr10	77983185	C	<INS:ME:Bov-A2>	PASS	TSD=ATAAAATGGGC;ASSESS=5;INTERNAL=null,null;SVTYPE=Bov-A2;SVLEN=267;MEINFO=Bov-A2,1,268,+;DIFF=1:a11g,g55a,a68g,c74t,c87t,a92g,a100g,g104a,g112a,c123t,a152c,g211a,g231a,c240t,c244a,g247a,c255t,g256a;LP=41;RP=32;RA=0.358;PRIOR=false;SR=26	0/0:-0,-9.63,-189.3	1/1:-220.91,-15.05,-1.81	0/0:-0,-8.43,-164.2	0/0:-0,-6.02,-118.8	0/0:-0,-7.83,-154.7	0/0:-0,-6.62,-128.8	0/1:-108,-9.63,-70	0/0:-0.43,-7.22,-132.3	0/1:-61.7,-7.83,-69.12	0/0:-0,-6.62,-130	0/0:-0,-11.44,-223.7	0/1:-133.9,-12.04,-82	0/0:-0.3,-15.05,-272	0/0:-0,-6.02,-118.6	0/0:-0,-5.42,-104.9	0/0:-0,-6.62,-132	0/0:-0,-6.62,-130.8	0/0:-0,-11.44,-223.6	0/0:-0,-11.44,-222.9	0/0:-0,-10.84,-214.5	0/0:-0,-9.03,-174.6	0/0:-0,-6.62,-130	1/1:-150.4,-9.03,-0	0/1:-95.6,-8.43,-58	0/0:-0,-8.43,-166	0/0:-0,-7.83,-155	0/0:-0,-7.83,-154.8	0/0:-0,-12.04,-236.2	0/0:-0,-4.21,-82.8	0/0:-0,-10.24,-201.5	0/0:-0,-9.63,-182.5	0/0:-0,-18.66,-365.2	0/0:-0,-10.84,-212.2	0/0:-0,-8.43,-168	0/0:-0,-12.64,-247	0/0:-0,-7.83,-153.6	0/1:-111.6,-9.63,-58	0/0:-0,-6.62,-130
chr10	88682775	A	<INS:ME:Bov-A2>	PASS	TSD=null;ASSESS=4;INTERNAL=XM_024998225.1,PROMOTER;SVTYPE=Bov-A2;SVLEN=263;MEINFO=Bov-A2,5,268,+;DIFF=0.46:n1-4,t90a,c103a,t128a,c136t,n169-215,g231a,c255t;LP=5;RP=3;RA=0.737;PRIOR=false;SR=4	0/0:-0.6,-11.44,-212.8	0/0:-0,-10.84,-209.7	0/0:-0,-11.44,-223.5	0/0:-0.6,-13.25,-244.5	0/0:-0.6,-10.24,-192.6	0/0:-0,-12.64,-245.5	0/0:-0.63,-15.65,-287.2	0/0:-0,-16.26,-319	0/0:-0,-13.85,-274	0/0:-0.6,-7.83,-142.8	0/0:-0,-10.84,-213.8	0/0:-0,-8.43,-164.9	0/0:-0,-13.25,-256	0/0:-0,-9.63,-188.3	0/1:-48,-6.62,-80.5	0/1:-36,-6.62,-94	0/0:-1.2,-15.05,-275.2	0/0:-0.6,-11.44,-212.6	0/0:-0.6,-9.63,-180.2	0/0:-0.6,-8.43,-156.6	0/0:-0,-10.24,-203.9	0/0:-0,-6.62,-130.7	0/0:-1.2,-10.84,-192.4	0/0:-0,-14.45,-280.8	0/0:-1.2,-10.24,-179.2	0/0:-0.22,-10.84,-200.4	0/0:-1.2,-8.43,-143.9	0/0:-0.6,-9.03,-162.9	0/0:-1.2,-12.04,-213.2	0/0:-1.2,-11.44,-205.2	0/0:-0,-7.83,-153.1	0/0:-1.2,-13.85,-253.2	0/0:-1.2,-11.44,-205.1	0/0:-0.6,-8.43,-156.6	0/0:-0.6,-12.04,-228.6	0/0:-0,-11.44,-220	0/0:-0,-7.83,-152.1	0/0:-0.6,-9.03,-168.6
chr10	95099574	T	<INS:ME:Bov-A2>	PASS	TSD=null;ASSESS=4;INTERNAL=null,null;SVTYPE=Bov-A2;SVLEN=266;MEINFO=Bov-A2,2,268,-;DIFF=0.17:n1,n29,t34a,c48t,c62a,n82,a92g,n103,c111a,n112,a124t,t128a,t133a,a137t,c163t,n170,n172,g198a,g200a,g209t,n233,g247a,a253c,n262,n267-269;LP=3;RP=5;RA=-0.737;PRIOR=false;SR=6	0/0:-0,-22.28,-440	0/0:-0,-9.03,-180	0/0:-0.6,-10.24,-192	0/0:-0.6,-4.82,-84.6	0/0:-1.2,-9.63,-169.2	0/1:-36,-10.84,-180	0/0:-0.6,-13.85,-262.6	0/0:-1.2,-7.22,-119.2	0/0:-0,-12.04,-240	0/0:-0,-7.83,-156	0/0:-0,-13.85,-276	0/0:-0,-7.83,-154	0/0:-0,-12.64,-250	0/0:-0,-17.46,-345	0/0:-0,-6.62,-130	0/0:-0,-3.61,-70	0/0:-0.6,-9.03,-167.9	0/0:-0,-2.41,-48	0/1:-34,-13.25,-228	0/0:-0,-6.62,-132	0/0:-0.6,-16.26,-310.6	0/0:-0,-1.81,-36	0/0:-0,-2.41,-48	0/0:-1.2,-8.43,-139.2	0/0:-0,-6.62,-132	0/0:-0,-9.63,-192	0/0:-0,-16.86,-336	0/0:-1.2,-10.84,-193.2	0/0:-0,-15.65,-309.6	0/0:-0,-13.25,-261.9	0/0:-0,-7.22,-144	0/0:-1.2,-13.85,-251.4	0/0:-0,-7.83,-155.5	0/0:-1.2,-12.04,-217.2	0/0:-0,-4.21,-84	0/0:-0,-4.82,-96	0/0:-0,-10.24,-204	0/0:-0,-6.62,-132
chr10	97453423	T	<INS:ME:Bov-A2>	PASS	TSD=TTTTTTTTTTT;ASSESS=5;INTERNAL=null,null;SVTYPE=Bov-A2;SVLEN=266;MEINFO=Bov-A2,2,268,+;DIFF=0:n1,a21g,g84a,t90c,n94-209,g231a,a261g;LP=1;RP=2;RA=-1;PRIOR=false;SR=10	0/0:-0,-15.65,-312	0/0:-0,-8.43,-168	0/0:-1.2,-10.24,-179.2	0/0:-0,-4.21,-84	0/1:-58,-9.03,-118.8	0/1:-46,-14.45,-238.9	0/1:-94.9,-15.05,-204	0/1:-83.8,-14.45,-202.2	0/1:-83.8,-17.46,-260.1	0/0:-0,-4.82,-94	0/1:-60,-13.25,-197.5	0/0:-0,-7.22,-142	0/0:-0,-12.04,-238	0/1:-106.5,-13.25,-152.1	0/0:-0,-8.43,-164	0/0:-0,-7.83,-156	0/0:-0,-7.22,-144	0/0:-0.6,-6.02,-108.6	0/1:-185.6,-14.45,-94	0/0:-0,-8.43,-168	0/0:-0.6,-11.44,-215.5	0/0:-0,-3.61,-72	0/0:-0,-10.84,-216	0/0:-1.2,-9.63,-165.2	0/0:-0,-7.22,-144	0/0:-0,-5.42,-108	0/0:-1.2,-11.44,-205.2	0/1:-82,-6.62,-48	0/1:-92.9,-19.87,-300	0/1:-60,-12.64,-192	0/0:-0,-12.04,-236	0/0:-1.2,-7.22,-121	0/1:-59.1,-4.82,-36	0/1:-36,-8.43,-132	0/0:-0,-9.03,-180	0/0:-0,-9.03,-180	0/0:-0,-5.42,-108	0/0:-1.2,-7.83,-133.2
chr10	99566775	A	<INS:ME:Bov-A2>	PASS	TSD=null;ASSESS=4;INTERNAL=null,null;SVTYPE=Bov-A2;SVLEN=268;MEINFO=Bov-A2,1,269,+;DIFF=0.43:n1,a53g,g55a,g56c,g88a,t90a,a91c,c97t,n110-269;LP=4;RP=2;RA=1;PRIOR=false;SR=5	0/0:-0,-13.25,-263.4	0/0:-0,-5.42,-108	0/0:-0,-13.25,-264	0/0:-0,-4.82,-96	0/0:-0,-13.25,-264	0/0:-0,-8.43,-168	0/0:-0,-9.63,-192	0/0:-0,-12.04,-240	0/0:-0,-19.27,-381.2	0/0:-0,-8.43,-168	0/0:-0,-12.64,-252	0/0:-0,-9.03,-178	0/0:-0,-19.27,-384	0/0:-0,-13.25,-264	0/0:-0,-11.44,-228	0/0:-0,-5.42,-108	0/0:-0,-7.83,-156	0/0:-0,-10.84,-216	0/0:-0,-15.65,-312	0/0:-0,-6.02,-120	0/0:-0,-8.43,-168	0/0:-0,-2.41,-48	0/0:-0,-5.42,-108	0/0:-0,-9.03,-180	0/0:-0,-12.04,-240	0/0:-0,-7.22,-144	0/0:-0,-8.43,-168	0/0:-0,-10.24,-204	0/0:-0,-15.65,-312	0/0:-0,-13.85,-276	0/0:-0,-8.43,-168	0/0:-0,-15.65,-312	0/0:-0.6,-9.03,-168.6	0/0:-0,-8.43,-168	0/0:-0,-10.24,-204	0/0:-0,-4.82,-96	0/1:-102,-9.63,-84	0/0:-0,-9.63,-192
chr10	100090921	T	<INS:ME:Bov-A2>	PASS	TSD=null;ASSESS=3;INTERNAL=null,null;SVTYPE=Bov-A2;SVLEN=267;MEINFO=Bov-A2,1,268,+;DIFF=0:g7a,c15t,t31c,n66-269;LP=2;RP=3;RA=-0.585;PRIOR=false;SR=7	0/0:-0,-15.65,-312	0/0:-0,-10.84,-216	0/0:-0,-12.04,-240	0/0:-0,-10.24,-204	0/0:-0,-10.24,-204	0/0:-0,-12.64,-252	0/0:-0.6,-10.84,-204.6	0/0:-0,-12.04,-238	0/0:-0,-15.05,-300	0/0:-0,-9.03,-180	0/0:-0,-12.04,-240	0/0:-0,-8.43,-168	0/0:-0,-16.86,-332	0/0:-0,-12.64,-249	0/0:-0.05,-8.43,-161	0/0:-0,-9.63,-192	0/0:-0,-9.63,-192	0/0:-0,-11.44,-228	0/0:-0,-10.24,-204	0/0:-0,-7.22,-144	0/0:-0,-10.84,-216	0/0:-0,-7.83,-156	0/0:-0,-13.85,-276	0/0:-0,-7.22,-144	0/0:-0,-9.63,-192	0/0:-0,-10.24,-204	0/0:-0,-9.63,-186.2	0/0:-0,-9.63,-192	0/0:-0,-8.43,-166	0/0:-0,-13.25,-264	0/0:-0,-7.83,-156	0/0:-0,-17.46,-348	0/0:-0,-12.64,-252	0/0:-0,-9.63,-192	0/0:-0,-10.84,-216	0/0:-0,-10.24,-204	0/1:-129.5,-9.03,-48	0/0:-0,-7.22,-144
chr11	2457850	A	<INS:ME:Bov-A2>	PASS	TSD=null;ASSESS=4;INTERNAL=NM_001034213.2,INTRONIC;SVTYPE=Bov-A2;SVLEN=267;MEINFO=Bov-A2,1,268,+;DIFF=0.59:c32g,t38c,g39a,c54t,g170t,g185a,c197t,g200c,g201a,c218t,c240t,c246t,n269;LP=18;RP=40;RA=-1.152;PRIOR=false;SR=14	0/0:-0.6,-10.24,-190.1	0/1:-65.76,-13.25,-176.3	0/0:-0,-17.46,-341.8	0/0:-0.6,-17.46,-324.6	0/0:-0,-10.24,-200.1	0/0:-0,-11.44,-220.9	0/0:-0,-9.03,-178	0/0:-0,-10.24,-202	0/0:-0.6,-10.24,-186.1	0/0:-0.6,-5.42,-94.2	0/0:-0,-11.44,-223.5	0/0:-0,-10.24,-200	0/0:-0.6,-15.65,-290.6	0/0:-0,-13.85,-274	0/0:-0,-6.62,-130.3	0/1:-24,-6.02,-92.4	0/0:-1.2,-12.64,-226.5	0/0:-0,-16.26,-323.7	0/0:-0,-12.64,-250.6	0/0:-0,-12.04,-239.9	0/0:-1.2,-14.45,-254.6	0/0:-0.6,-5.42,-95.8	0/0:-0,-16.26,-308.6	0/1:-65.2,-15.05,-221.43	0/0:-0,-8.43,-164	0/1:-48.4,-15.05,-234.06	0/0:-0,-12.04,-236.5	0/0:-0,-6.62,-128.4	0/0:-1.2,-12.04,-214.4	0/0:-0.61,-16.26,-303.2	0/0:-0,-14.45,-275	0/0:-0,-10.84,-207.5	0/0:-1.2,-9.03,-151.3	0/0:-0,-9.63,-187.6	0/0:-1.2,-13.85,-250	0/0:-0,-6.02,-117.9	0/0:-1.21,-9.03,-145.8	0/0:-0.6,-13.25,-242.9
chr11	7447769	T	<INS:ME:Bov-A2>	PASS	TSD=null;ASSESS=4;INTERNAL=XM_024999211.1,INTRONIC;SVTYPE=Bov-A2;SVLEN=267;MEINFO=Bov-A2,1,268,+;DIFF=0.93:a43t,c47a,a53g,c54t,g82a,n87,c97a,a100g,d127-131,c218t,g231a,c234a,c246a,a257c,n260-269;LP=111;RP=124;RA=-0.16;PRIOR=false;SR=6	0/1:-89.51,-12.64,-135.8	0/1:-52,-12.04,-170	0/1:-82.1,-13.25,-165.9	0/1:-250,-19.27,-80.6	0/1:-111.1,-16.26,-185.6	0/1:-47.4,-11.44,-165.9	0/0:-0,-7.83,-156	0/0:-0.03,-10.84,-210.6	0/1:-90,-14.45,-177.5	0/0:-0,-9.63,-184.9	0/0:-0,-9.03,-180	0/0:-0.6,-3.01,-46.6	0/1:-86.3,-19.27,-253.1	0/0:-0,-6.62,-132	0/0:-0,-6.62,-119.7	0/0:-0,-4.82,-93	0/1:-178.4,-15.05,-82	0/1:-108.6,-15.05,-147.76	0/1:-50,-5.42,-48	0/1:-150,-13.25,-80	0/0:-0,-12.64,-248.7	0/0:-0,-7.83,-134.9	0/0:-0,-12.04,-240	0/1:-26.6,-6.62,-82.9	0/1:-60,-9.03,-100	0/0:-0,-10.24,-201.8	0/0:-0,-10.84,-216	0/0:-0,-8.43,-167.2	0/0:-0,-8.43,-166.7	0/0:-0,-9.03,-173.9	0/0:-0,-11.44,-222	0/0:-0,-7.83,-153	0/1:-72,-10.24,-116	0/0:-0,-11.44,-224.4	0/0:-0,-12.64,-252	0/1:-40,-9.63,-143.3	0/1:-52,-9.03,-118	0/1:-30,-9.63,-150.5
chr11	10372575	A	<INS:ME:Bov-A2>	PASS	TSD=ATGGGGTCGCACAGAGTCGGACACGACTGA;ASSESS=5;INTERNAL=XM_015473386.2,INTRONIC;SVTYPE=Bov-A2;SVLEN=267;MEINFO=Bov-A2,1,268,+;DIFF=1:a53g,c54t,g70a,g98a,c103t,g110a,c132g,g144a,g150a,t220c,c255t,c263t,c266t,n269;LP=271;RP=266;RA=0.027;PRIOR=false;SR=58	0/1:-305.4,-24.68,-117	0/1:-62.9,-11.44,-126.91	0/1:-111.2,-14.45,-143.3	0/1:-187.1,-16.26,-72.4	0/1:-60.5,-16.86,-239.7	0/1:-71.6,-12.04,-150.4	0/1:-85.5,-16.26,-204.2	0/1:-156.3,-13.85,-60.23	0/1:-139.3,-18.06,-177.06	0/0:-0,-7.22,-140.7	0/1:-132.41,-16.26,-145.12	1/1:-37.8,-3.01,-0.63	0/1:-59,-14.45,-206	0/0:-0,-13.85,-276	0/1:-142.73,-17.46,-117.48	0/1:-24.3,-3.61,-22.93	0/1:-89,-10.24,-70.07	1/1:-206.5,-14.45,-1.65	0/1:-219.6,-21.07,-112.69	0/1:-58.3,-6.62,-58	0/1:-61.1,-12.04,-145.87	0/1:-36,-6.02,-38.11	1/1:-174.7,-12.64,-1.24	0/1:-20,-4.82,-66	0/1:-26.6,-7.22,-90.12	0/1:-34.28,-9.63,-128.8	0/1:-66.3,-14.45,-189	0/1:-70.7,-9.63,-100.22	0/1:-158.3,-17.46,-129.3	0/1:-241.4,-22.28,-112.31	0/1:-141.6,-15.65,-119.1	0/1:-80,-16.26,-200.91	0/1:-235.2,-18.66,-74.8	0/1:-69.6,-9.63,-100.7	0/0:-0,-10.24,-204	0/0:-0,-7.22,-144	0/1:-39.98,-10.84,-143.02	0/1:-61.8,-9.63,-102.03
chr11	23951103	C	<INS:ME:Bov-A2>	PASS	TSD=AGGACTATAAC;ASSESS=5;INTERNAL=null,null;SVTYPE=Bov-A2;SVLEN=267;MEINFO=Bov-A2,1,268,-;DIFF=0.88:a11g,g13a,g88a,a118c,a137c,t188c,g213t,n238-269;LP=86;RP=94;RA=-0.128;PRIOR=false;SR=7	0/0:-0,-12.04,-240	0/0:-0,-3.01,-60	0/0:-0,-13.25,-264	1/1:-84.6,-5.42,-0.6	0/0:-0,-10.84,-216	0/1:-186,-18.66,-155.3	0/0:-0,-13.85,-276	0/0:-0,-15.05,-298.5	0/0:-0,-16.86,-335.7	0/0:-0,-9.63,-192	0/1:-62,-12.64,-180	0/1:-63.3,-11.44,-156	0/0:-0,-15.05,-298	0/1:-168,-14.45,-96	0/0:-0,-9.63,-192	0/0:-0,-5.42,-108	0/1:-126,-10.24,-60	0/0:-0,-8.43,-168	0/1:-170,-21.67,-228	0/0:-0,-6.62,-132	0/0:-0,-11.44,-224	1/1:-144.6,-9.03,-0.6	0/1:-124,-9.03,-36	0/0:-0,-5.42,-108	0/0:-0,-7.22,-144	0/0:-0,-6.02,-120	1/1:-253.2,-16.26,-1.21	0/0:-0,-14.45,-288	0/0:-0,-14.45,-288	0/1:-82,-12.04,-144	0/0:-0,-10.24,-204	0/0:-0,-16.86,-336	0/1:-126.1,-10.84,-72	0/0:-0,-9.03,-180	0/1:-220,-18.66,-120	0/1:-20,-6.02,-96	0/0:-0,-7.22,-144	0/0:-0,-9.03,-180
chr11	33235161	A	<INS:ME:Bov-A2>	PASS	TSD=null;ASSESS=4;INTERNAL=XM_024998299.1,INTRONIC;SVTYPE=Bov-A2;SVLEN=266;MEINFO=Bov-A2,2,268,-;DIFF=0.38:n1,a60g,a68g,g88a,a92g,c123t,n150-181,n190-194,n200,n203,n205,n213,g219a,a223c,n226-227,g231t,a233t,c240t,n244,a253t,g256t,a261t,g265t,n269;LP=5;RP=1;RA=2.322;PRIOR=false;SR=5	0/0:-0,-18.66,-368	0/0:-1.2,-9.63,-166	0/0:-0,-15.65,-312	0/0:-0,-5.42,-108	0/0:-0,-9.63,-192	0/0:-0,-14.45,-288	0/0:-0,-13.25,-264	0/0:-0,-15.65,-312	0/0:-0,-7.83,-156	0/0:-0,-10.84,-214	0/0:-0.6,-20.47,-394.6	0/0:-0.6,-6.02,-108.6	0/0:-0,-15.65,-312	0/0:-0,-12.04,-240	0/0:-0,-11.44,-228	0/0:-0,-6.02,-120	0/0:-0,-7.22,-137.7	0/0:-0,-5.42,-108	0/0:-0,-7.83,-156	0/0:-0,-4.21,-81.9	0/0:-0,-19.27,-384	0/0:-0,-5.42,-108	0/0:-0,-7.83,-156	0/1:-36,-5.42,-72	0/0:-0,-11.44,-228	0/0:-0,-5.42,-105.3	0/0:-0,-14.45,-288	0/0:-0,-19.87,-396	0/0:-0,-18.06,-358	0/0:-0,-12.04,-240	0/0:-0,-7.83,-156	0/0:-0,-16.26,-322	0/0:-0,-9.63,-190	0/0:-0,-10.84,-216	0/0:-0,-6.02,-120	0/0:-0,-9.03,-180	0/0:-0,-9.63,-192	0/0:-0,-3.01,-60
chr11	33832111	G	<INS:ME:Bov-A2>	PASS	TSD=G;ASSESS=5;INTERNAL=null,null;SVTYPE=Bov-A2;SVLEN=266;MEINFO=Bov-A2,2,268,+;DIFF=0.83:n1,t34a,g55a,t90g,g172a,g193t,g198a,g200a,g213a,g216a,c218a,t222c,c234a,g241a,n249-269;LP=4;RP=7;RA=-0.807;PRIOR=false;SR=7	0/0:-0,-16.26,-321	0/0:-0.91,-14.45,-256.7	0/0:-0,-15.65,-304.8	0/0:-0.6,-5.42,-91.1	0/0:-1.2,-12.64,-224.6	0/0:-0.6,-11.44,-214	0/1:-81.6,-12.64,-162	0/0:-0.6,-10.24,-189.1	0/0:-1.81,-20.47,-359.51	0/0:-1.2,-9.03,-149.3	0/0:-1.2,-10.84,-180.6	0/1:-34,-8.43,-122.1	0/0:-0,-21.07,-418.4	0/0:-0,-12.64,-242.2	0/0:-0.15,-9.03,-157.5	0/0:-0,-4.21,-78	0/0:-0,-4.82,-92.5	0/0:-0.6,-8.43,-154.6	0/0:-1.2,-15.05,-263.2	0/0:-1.2,-10.24,-177.5	0/0:-0,-13.25,-264	0/0:-0.6,-4.21,-62.7	0/0:-0,-8.43,-162.6	0/0:-0.61,-9.63,-165	0/0:-0.6,-10.24,-180.1	0/0:-0.6,-13.25,-225	0/1:-38.93,-13.25,-204.7	0/0:-1.81,-16.26,-287.51	0/0:-0.6,-15.05,-287.6	0/0:-1.81,-15.05,-259.81	0/0:-0,-8.43,-159.1	0/1:-33,-10.84,-174	0/1:-46.03,-9.63,-137.2	0/0:-0.03,-9.63,-187.1	0/0:-0,-9.03,-180	0/0:-0.6,-3.61,-60.6	0/1:-23.3,-6.62,-102.8	0/0:-0.6,-6.62,-118.5
chr11	35779838	T	<INS:ME:Bov-A2>	PASS	TSD=null;ASSESS=4;INTERNAL=null,null;SVTYPE=Bov-A2;SVLEN=246;MEINFO=Bov-A2,22,268,-;DIFF=0.33:n1-21,t38c,a68g,g88c,t90a,g98a,c106t,g112a,g151a,c162t,g198a,g213a,g226a,g228a,g231a,n239,c246t,c255t,n267-269;LP=2;RP=3;RA=-0.585;PRIOR=false;SR=6	0/0:-0,-12.64,-252	0/0:-0,-12.64,-241	0/0:-0,-16.86,-326.3	0/0:-0,-8.43,-168	0/0:-0.43,-10.24,-195.4	0/0:-0,-10.24,-202.7	0/0:-0,-12.64,-252	0/0:-0,-12.64,-248.6	0/1:-24,-5.42,-78.7	0/0:-0,-5.42,-104	0/0:-0,-15.05,-298	0/0:-0,-6.62,-132	0/0:-0,-14.45,-288	0/0:-0.6,-11.44,-215.3	0/0:-0,-6.02,-120	0/0:-0,-10.24,-204	0/0:-0.01,-7.22,-135.4	0/0:-0,-8.43,-168	0/1:-83,-7.22,-60	0/0:-0,-8.43,-167.3	0/0:-0,-12.64,-247.1	0/0:-0,-1.81,-36	0/0:-0,-6.62,-132	0/0:-0,-8.43,-165	0/0:-0.6,-7.22,-132.6	0/0:-0.26,-9.63,-171	0/0:-0,-9.03,-180	0/0:-0.13,-16.26,-318.6	0/0:-0.6,-16.86,-323.2	0/0:-0,-10.84,-215.5	0/0:-0,-8.43,-164.2	0/0:-0,-11.44,-226.7	0/0:-0,-11.44,-225.3	0/0:-0.7,-13.85,-251.7	0/0:-0,-9.03,-178.1	0/0:-0.01,-5.42,-96.1	0/0:-0.01,-8.43,-157.1	0/0:-0,-7.22,-144
chr11	39599886	A	<INS:ME:Bov-A2>	PASS	TSD=AAAAAAAAA;ASSESS=5;INTERNAL=null,null;SVTYPE=Bov-A2;SVLEN=267;MEINFO=Bov-A2,1,268,+;DIFF=0.43:c54t,t67a,g84t,t96a,g98a,g110c,c111t,t116a,t120a,n122,n129-131,n134-142,n160,a184c,n196,n200-269;LP=2;RP=6;RA=-1.585;PRIOR=false;SR=13	0/0:-0,-12.64,-250	0/1:-48,-5.42,-60	0/0:-1.81,-15.65,-277.81	0/0:-0.6,-5.42,-96.6	0/0:-1.2,-10.84,-192.5	0/0:-0.6,-12.64,-238.6	0/0:-1.93,-14.45,-248.41	0/0:-1.2,-8.43,-144	0/0:-0,-16.26,-324	0/0:-0,-7.83,-152	0/1:-96,-15.65,-214	0/0:-0.6,-5.42,-90.4	0/0:-0,-12.64,-252	0/1:-48,-8.43,-119.2	0/0:-0,-9.03,-176	0/1:-34,-8.43,-132	0/0:-0.6,-7.22,-132.6	0/0:-0,-6.02,-120	0/1:-48,-9.63,-144	0/0:-0.6,-9.63,-180.6	0/0:-0.6,-5.42,-96.6	0/0:-0,-5.42,-102.1	0/0:-0,-9.03,-180	0/1:-46.1,-6.62,-83.1	0/1:-58.9,-10.24,-140.7	0/1:-74.4,-12.64,-168	0/0:-0,-10.84,-216	0/0:-0.6,-8.43,-155.9	0/1:-70.9,-13.25,-191.8	0/0:-0,-13.25,-262	0/0:-0.03,-6.62,-123	0/1:-34,-7.22,-108	0/0:-0.6,-9.63,-180.6	0/0:-0.6,-9.03,-168.6	0/0:-0,-10.24,-204	0/0:-0,-7.22,-144	0/0:-0,-11.44,-224	0/0:-0.6,-6.62,-120.6
chr11	45598672	G	<INS:ME:Bov-A2>	PASS	TSD=dTGCCTGTCCGTGGCCCATGGACA;ASSESS=5;INTERNAL=XM_005212747.4,INTRONIC;SVTYPE=Bov-A2;SVLEN=264;MEINFO=Bov-A2,4,268,-;DIFF=0.19:n1-3,n48-49,c54t,a68g,g73t,c87t,t90a,g172a,t173c,g182a,g185a,g193t,c197t,g200a,n216-269;LP=3;RP=3;RA=0;PRIOR=false;SR=5	0/0:-0,-11.44,-221.4	0/0:-0,-16.26,-311.6	0/0:-0,-6.02,-115.4	0/1:-31,-7.22,-92.52	0/0:-0,-8.43,-162.7	0/0:-0,-10.24,-191.2	0/0:-0,-14.45,-278	0/0:-0,-6.62,-128.7	0/0:-0,-15.05,-297.4	0/0:-0,-6.62,-126.8	0/0:-0,-7.83,-150.2	0/0:-0,-4.21,-84	0/0:-0,-11.44,-214.8	0/0:-0,-9.63,-182.2	0/0:-0,-6.02,-118	0/0:-0,-1.81,-36	0/0:-0,-6.62,-132	0/0:-0,-10.84,-216	0/0:-0.6,-17.46,-326.7	0/0:-0,-5.42,-108	0/0:-0.22,-12.64,-241.7	0/1:-22.01,-6.62,-99.5	0/0:-0,-7.83,-156	0/0:-0,-4.21,-77.9	0/0:-0,-6.62,-132	0/0:-0,-9.63,-185.4	0/0:-0,-8.43,-163.5	0/0:-0,-6.62,-126.4	0/0:-0,-10.84,-209.4	0/0:-0,-10.84,-211.6	0/0:-0,-11.44,-224.6	0/0:-0,-11.44,-222.5	0/0:-0,-6.02,-115.5	0/0:-0,-5.42,-103.7	0/0:-0,-9.03,-180	0/0:-0,-6.02,-118	0/0:-0,-8.43,-164	0/1:-42.6,-9.03,-126.23
chr11	47561803	T	<INS:ME:Bov-A2>	PASS	TSD=null;ASSESS=4;INTERNAL=null,null;SVTYPE=Bov-A2;SVLEN=255;MEINFO=Bov-A2,14,269,+;DIFF=0.94:n1-14,c30t,c54t,a68g,c97t,c103t,t127c,g170a,g182t,g216t,g241a,n269;LP=10;RP=8;RA=0.322;PRIOR=false;SR=4	0/0:-0,-10.24,-204	0/0:-0,-12.64,-252	0/0:-0,-10.84,-215	0/0:-0,-13.25,-264	0/0:-0,-6.02,-120	0/0:-0,-10.24,-204	0/0:-0,-17.46,-346	0/0:-0,-10.24,-204	0/0:-0,-12.04,-240	0/0:-0,-15.05,-300	0/0:-0,-12.04,-240	0/0:-0,-4.82,-96	0/0:-0,-10.84,-214	0/0:-0,-9.03,-180	0/0:-0,-9.03,-180	0/0:-0,-3.61,-72	0/1:-142,-12.04,-72	0/0:-0,-14.45,-288	0/0:-0,-13.85,-276	0/0:-0,-9.63,-192	0/0:-0,-4.82,-96	0/0:-0,-5.42,-108	0/0:-0,-16.26,-324	0/0:-0,-8.43,-168	0/0:-0,-6.62,-132	0/0:-0,-11.44,-228	0/0:-0,-8.43,-167.5	0/0:-0,-16.26,-324	0/0:-0,-6.62,-132	0/0:-0,-11.44,-228	0/0:-0,-11.44,-228	0/0:-0,-9.03,-180	0/0:-0,-11.44,-228	0/0:-0,-13.25,-264	0/0:-0,-12.04,-240	0/1:-86,-9.03,-84	0/0:-0,-9.03,-180	0/0:-0,-3.01,-60
chr11	47939345	T	<INS:ME:Bov-A2>	PASS	TSD=CCT;ASSESS=5;INTERNAL=NM_001083484.1,INTRONIC;SVTYPE=Bov-A2;SVLEN=267;MEINFO=Bov-A2,1,268,+;DIFF=1:a11g,t72c,c74a,a92t,g93a,a102c,t138c,g139a,t142a,a152c,c158t,c197t,g200c,g201a,c249t,g254a,g256t;LP=237;RP=246;RA=-0.054;PRIOR=false;SR=88	1/1:-217.81,-14.45,-1.81	0/1:-167.9,-16.26,-120	1/1:-203.6,-13.25,-1.2	0/1:-104,-14.45,-168	0/1:-60,-10.84,-144	0/0:-0,-10.24,-204	0/1:-208,-15.05,-60	1/1:-157.2,-10.24,-1.2	1/1:-190.5,-12.64,-1.23	0/1:-171.7,-12.64,-46	0/0:-0,-11.44,-228	0/0:-0,-7.22,-142	0/1:-168,-19.27,-192	0/1:-112,-13.85,-144	0/1:-90,-9.63,-84	1/1:-128.7,-8.43,-0.6	0/0:-0,-8.43,-168	0/0:-0,-10.24,-204	1/1:-239.2,-15.05,-1.2	0/0:-0,-9.63,-192	0/1:-156,-11.44,-48	0/1:-69.5,-6.02,-36	0/1:-158,-13.85,-96	0/1:-40.9,-6.62,-84	0/0:-0,-11.44,-228	0/1:-122,-13.85,-132	0/1:-144,-10.24,-36	0/1:-134,-10.24,-45.6	1/1:-142.6,-9.03,-0.6	0/1:-224,-16.86,-70	1/1:-199.5,-12.64,-1.2	1/1:-249.2,-15.65,-1.21	1/1:-195.2,-12.64,-1.2	0/1:-156,-13.25,-83.4	1/1:-263.81,-16.86,-1.81	0/0:-0,-7.22,-144	0/0:-0,-9.63,-192	1/1:-193.2,-12.64,-1.2
chr11	49995783	T	<INS:ME:Bov-A2>	PASS	TSD=null;ASSESS=3;INTERNAL=NM_001076275.1,INTRONIC;SVTYPE=Bov-A2;SVLEN=258;MEINFO=Bov-A2,10,268,+;DIFF=0.51:n1-9,n17,c30t,c54t,g58a,g59a,c62a,g73a,t77c,g88a,t90a,n102-104,g108a,c130t,a131c,a223c,n256-269;LP=5;RP=5;RA=0;PRIOR=false;SR=5	0/0:-0,-13.25,-263.7	0/0:-0,-15.05,-290.8	0/0:-0,-11.44,-222.2	0/0:-0,-9.63,-192	0/0:-0,-9.63,-189.3	0/0:-0,-13.85,-272	0/0:-0,-9.63,-192	0/0:-0,-11.44,-223.8	0/0:-0.13,-12.64,-243.6	0/0:-0,-6.62,-131.4	0/0:-0,-16.26,-319.8	0/0:-0,-8.43,-168	0/0:-0,-10.24,-202	0/0:-0,-12.64,-250.5	0/0:-0,-10.84,-216	0/0:-0,-6.02,-120	0/0:-0,-7.22,-144	0/0:-0,-6.02,-118	0/0:-0,-11.44,-225.6	0/0:-0,-7.22,-144	0/0:-0,-15.65,-311.7	0/0:-0,-4.21,-84	0/1:-36,-7.22,-104	0/0:-0,-6.02,-120	0/0:-0,-9.03,-180	0/0:-1.81,-14.45,-244.31	0/0:-0,-12.64,-248	0/0:-0,-10.84,-213	0/0:-0,-12.04,-233.9	0/0:-0,-9.03,-180	0/0:-0,-8.43,-168	0/0:-0,-10.84,-212	0/0:-0,-8.43,-164	0/0:-0,-10.84,-212	0/0:-0,-12.04,-240	0/0:-0,-8.43,-168	0/0:-0,-6.62,-132	0/0:-0.6,-9.03,-168.6
chr11	59687676	T	<INS:ME:Bov-A2>	PASS	TSD=null;ASSESS=4;INTERNAL=XR_003037201.1,INTRONIC;SVTYPE=Bov-A2;SVLEN=259;MEINFO=Bov-A2,9,268,-;DIFF=0.62:n1-8,c37a,c54t,g61a,c111t,g172a,c175t,g178c,c189t,n192,g193c,g198a,g200a,n209-209,n211,n213,n227,n231,c246t,n256,n258;LP=14;RP=11;RA=0.348;PRIOR=false;SR=32	0/0:-0.64,-8.43,-144.9	0/0:-0,-6.62,-124.9	0/1:-60,-12.04,-171.8	0/0:-0.6,-4.82,-80.6	0/0:-0.6,-8.43,-154	0/1:-68,-9.63,-117.5	0/1:-44.8,-7.22,-92	0/1:-55.06,-9.63,-121.33	0/0:-0,-14.45,-285.1	0/0:-0.6,-7.83,-140.6	0/1:-81.9,-14.45,-198.2	0/0:-0,-11.44,-222	0/1:-70,-4.82,-22.8	0/1:-36,-8.43,-129.3	0/0:-0.3,-7.22,-133.7	0/1:-46,-3.61,-22	0/0:-0,-9.63,-190	0/1:-46,-4.21,-34	0/0:-2.37,-15.05,-246.61	0/0:-0,-5.42,-104	0/0:-0,-10.84,-212.5	0/0:-0.6,-1.81,-24.6	0/0:-0,-5.42,-108	0/0:-0,-12.64,-236.1	0/0:-0.02,-6.02,-107.3	0/0:-0.6,-6.62,-117.2	0/0:-0,-15.05,-297.8	0/0:-0.6,-12.64,-238.4	0/0:-0,-6.02,-118.7	0/1:-48,-9.03,-132	0/1:-46,-6.62,-82	0/1:-96,-8.43,-72	0/0:-0.6,-13.85,-258.4	0/0:-1.33,-9.03,-145.8	0/0:-0.6,-6.02,-108.6	0/0:-0.6,-8.43,-153.4	0/0:-0,-9.03,-172.1	0/1:-90.7,-6.62,-32.1
chr11	68042128	C	<INS:ME:Bov-A2>	PASS	TSD=null;ASSESS=3;INTERNAL=null,null;SVTYPE=Bov-A2;SVLEN=269;MEINFO=Bov-A2,0,269,-;DIFF=0.99:c54t,g65c,c101t,c103t,g112a,c130t,t134a,a141g,c168t,g172a,t188c,g198a,g202a,c206a,a223c,t229a,c255t,n266-269;LP=13;RP=18;RA=-0.469;PRIOR=false;SR=4	0/0:-0,-13.85,-276	1/1:-288.61,-19.87,-2.49	0/0:-0,-14.45,-286.1	0/0:-0,-8.43,-168	0/0:-0,-15.05,-300	0/0:-0,-7.22,-144	0/0:-0,-6.62,-132	0/0:-0,-8.43,-168	0/0:-0,-15.05,-300	0/0:-0,-9.63,-192	0/0:-0,-10.84,-216	0/0:-0,-9.63,-192	0/0:-0,-15.65,-312	0/0:-0,-11.44,-228	0/0:-0,-12.04,-235.3	0/0:-0,-7.22,-144	0/0:-0,-9.63,-192	0/0:-0,-9.63,-192	0/0:-0,-11.44,-228	0/0:-0,-3.61,-72	0/0:-0,-12.04,-238	0/0:-0,-7.22,-144	0/0:-0,-6.02,-120	0/0:-0,-9.03,-180	0/0:-0,-11.44,-228	0/0:-0,-12.64,-252	0/0:-0,-12.04,-240	0/0:-0,-13.25,-264	0/0:-0,-11.44,-228	0/0:-0,-11.44,-228	0/0:-0,-10.84,-216	0/0:-0,-9.03,-180	0/0:-0,-13.25,-264	0/0:-0,-13.25,-264	0/0:-0,-8.43,-168	0/1:-103.3,-12.04,-120	0/0:-0,-7.22,-143.4	0/0:-0,-6.62,-132
chr11	74426546	A	<INS:ME:Bov-A2>	PASS	TSD=dAGTGAAAGTGA;ASSESS=5;INTERNAL=XM_024999230.1,INTRONIC;SVTYPE=Bov-A2;SVLEN=267;MEINFO=Bov-A2,1,268,-;DIFF=0.4:c9a,c17a,c18t,c20t,t28c,g55a,g66a,g73a,g88a,t90a,t129c,n132-144,a148g,a153c,n160,g182a,t188c,g198t,g200c,a203g,t222c,g231a,g238c,n246-269;LP=4;RP=6;RA=-0.585;PRIOR=false;SR=8	0/0:-0,-11.44,-222.7	0/0:-0,-13.85,-260.8	0/0:-0,-12.64,-249.2	0/0:-0,-12.04,-233.2	0/0:-0,-10.84,-216	0/0:-0.6,-12.64,-240.6	0/0:-0,-13.85,-274	0/0:-0,-10.24,-204	0/0:-1.21,-13.25,-232.5	0/0:-0,-9.63,-189.4	0/0:-0,-16.26,-314.8	0/0:-0,-3.61,-68	0/0:-0,-10.24,-200.9	0/0:-0.6,-14.45,-272.6	0/0:-0,-10.84,-211.6	0/0:-0,-4.82,-96	0/0:-0,-7.83,-151	0/0:-0,-10.24,-204	0/0:-0,-12.64,-246	0/0:-0.73,-8.43,-151.2	0/0:-0,-12.64,-242.3	0/0:-0,-7.83,-144	0/0:-0,-13.85,-274	0/1:-14.4,-5.42,-80.04	0/0:-0.73,-9.63,-163.2	0/0:-0.61,-10.84,-183.8	0/0:-0,-10.84,-214	0/0:-0,-8.43,-164.6	0/0:-0,-11.44,-223.5	0/0:-0,-13.85,-272	0/0:-0.05,-9.63,-180.9	0/0:-0.6,-7.83,-136	0/0:-0.64,-8.43,-149.7	0/0:-1.2,-15.05,-273.9	0/0:-0,-7.22,-143.8	0/0:-0.6,-8.43,-140.3	0/0:-0,-4.82,-94	0/0:-0,-7.83,-156
chr11	77726779	A	<INS:ME:Bov-A2>	PASS	TSD=null;ASSESS=3;INTERNAL=XM_024999765.1,INTRONIC;SVTYPE=Bov-A2;SVLEN=267;MEINFO=Bov-A2,1,268,+;DIFF=0.27:c9a,t12c,c17a,c18t,t28g,c32a,g55a,g73a,t77c,n84-142,t171g,g172a,t173c,c175a,g185a,g193t,g198a,g200a,g211a,n216-269;LP=7;RP=6;RA=0.222;PRIOR=false;SR=5	0/0:-0.6,-15.05,-286.6	0/0:-0.6,-6.62,-118.6	0/0:-0,-15.65,-312	0/0:-0,-8.43,-168	0/0:-0,-15.65,-311.1	0/0:-0,-17.46,-348	0/0:-0,-15.05,-295.1	0/0:-0,-13.85,-276	0/1:-60,-16.26,-261.6	0/0:-0,-7.22,-143.9	0/0:-0,-19.27,-384	0/0:-0.6,-10.24,-192.6	0/0:-0.6,-17.46,-336.6	0/0:-0.6,-13.25,-249.6	0/0:-0,-9.63,-186.4	0/0:-0,-3.01,-60	0/0:-0,-10.84,-216	0/0:-0,-5.42,-108	0/0:-0,-18.66,-372	0/0:-0,-6.62,-132	0/0:-0,-10.24,-204	0/0:-0,-2.41,-48	0/0:-0,-4.82,-96	0/0:-0.6,-10.84,-202.6	0/0:-0.6,-10.24,-192.6	0/0:-0.6,-7.22,-132.6	0/0:-1.2,-12.64,-229.2	0/0:-0,-13.85,-276	0/0:-1.2,-16.26,-301.2	0/0:-0,-18.66,-372	0/0:-0.6,-9.03,-168.6	0/0:-0,-10.24,-204	0/0:-0,-15.05,-300	0/0:-0.6,-13.85,-262.9	0/0:-0,-9.03,-180	0/0:-0,-6.62,-127.6	0/0:-0,-8.43,-168	0/0:-0,-6.02,-120
chr11	79177101	A	<INS:ME:Bov-A2>	PASS	TSD=dATTATGTTC;ASSESS=5;INTERNAL=null,null;SVTYPE=Bov-A2;SVLEN=254;MEINFO=Bov-A2,14,268,+;DIFF=0.95:n1-13,g39a,c54t,n91,c175t,g202a,g231a,g251a,t259a,n269;LP=93;RP=59;RA=0.657;PRIOR=false;SR=24	0/0:-0,-10.24,-201.1	1/1:-213.61,-16.86,-2.78	0/0:-0,-19.87,-395.7	0/0:-0,-9.03,-180	0/0:-0,-13.25,-262	0/0:-0,-9.63,-189.9	0/0:-0,-8.43,-168	0/0:-0,-10.24,-204	0/0:-0,-16.86,-334.9	0/0:-0,-9.03,-177.5	0/0:-0.03,-14.45,-276.1	1/1:-107,-9.63,-2.13	0/0:-0.6,-13.25,-242	0/0:-0,-10.84,-216	0/0:-0,-7.83,-154.8	0/0:-0,-9.63,-183.3	1/1:-222.2,-15.05,-1.13	0/0:-0,-9.63,-190	0/0:-0,-16.26,-320.7	1/1:-258.1,-16.26,-0.08	0/0:-0,-9.03,-180	0/0:-0,-4.21,-82	0/0:-0,-9.63,-192	0/1:-48.8,-12.04,-160.41	1/1:-156.1,-12.64,-1.55	0/1:-160.26,-15.65,-87.62	0/0:-0,-17.46,-347.7	0/0:-0,-9.03,-180	0/0:-0,-12.64,-250	0/0:-0,-9.63,-190	1/1:-287.31,-20.47,-2.53	0/0:-0,-15.65,-308	0/0:-0.03,-15.05,-284.6	0/0:-0,-10.24,-202	0/0:-0,-11.44,-226	0/0:-0,-8.43,-168	0/0:-0,-13.25,-264	0/0:-0,-8.43,-168
chr11	87704994	G	<INS:ME:Bov-A2>	PASS	TSD=null;ASSESS=3;INTERNAL=NM_001075503.1,INTRONIC;SVTYPE=Bov-A2;SVLEN=258;MEINFO=Bov-A2,10,268,+;DIFF=0.25:n1-9,c17a,c30t,n31,g39a,a42g,n68-142,g172a,g182a,g193t,g200a,n211-269;LP=9;RP=8;RA=0.17;PRIOR=false;SR=10	0/0:-0,-11.44,-228	0/0:-0,-6.62,-132	0/0:-0,-16.26,-324	0/0:-0,-7.22,-144	0/0:-0,-6.62,-132	0/0:-0,-7.83,-156	0/0:-0,-9.03,-180	0/0:-0,-10.24,-201.6	0/0:-0,-15.05,-300	0/0:-0,-4.82,-96	0/0:-0,-15.05,-296.4	0/0:-0,-6.02,-120	0/0:-0,-11.44,-228	0/0:-0,-9.63,-192	0/0:-0,-3.61,-72	0/0:-0,-10.84,-216	0/0:-0,-13.85,-276	0/0:-0,-6.02,-120	0/0:-0,-9.63,-190	0/0:-0,-13.85,-276	0/0:-0,-9.03,-180	0/0:-0,-1.81,-36	0/0:-0,-6.02,-120	0/0:-0,-13.25,-263.4	0/1:-45.6,-7.83,-107.7	0/0:-0,-12.04,-240	0/0:-0,-13.25,-264	0/0:-0,-7.83,-156	0/0:-0,-12.64,-252	0/0:-0,-9.63,-192	0/0:-0,-9.03,-180	0/0:-0,-10.84,-216	0/0:-0,-5.42,-108	0/0:-0,-9.63,-192	0/0:-0,-2.41,-48	0/0:-0.6,-6.02,-108.6	0/0:-0,-4.82,-96	0/0:-0,-10.84,-216
chr11	89304852	A	<INS:ME:Bov-A2>	PASS	TSD=null;ASSESS=4;INTERNAL=null,null;SVTYPE=Bov-A2;SVLEN=267;MEINFO=Bov-A2,1,268,-;DIFF=1:c32g,t38c,c54t,g98a,t129c,t138g,g193t,g200a,g202a,g211a,c218a,t222c;LP=209;RP=153;RA=0.45;PRIOR=false;SR=20	0/1:-46.8,-12.04,-170.06	0/0:-0,-7.83,-154.2	0/1:-56,-10.84,-136	0/1:-255.63,-20.47,-87.22	0/1:-62,-14.45,-210	0/0:-0,-8.43,-167.2	0/0:-0,-10.84,-216	0/0:-0,-7.83,-156	0/1:-52,-15.05,-236	0/1:-59.1,-9.03,-93.8	0/1:-97.4,-16.26,-183.6	0/1:-31.7,-3.61,-20	0/1:-118.9,-18.66,-220	0/0:-0,-13.25,-260.1	0/1:-40,-9.03,-120.1	0/1:-27.1,-3.61,-36.03	0/1:-93.83,-12.04,-111.2	0/0:-0,-7.22,-144	0/1:-95,-16.86,-194.69	0/0:-0,-8.43,-161.9	0/1:-67,-12.04,-154	0/0:-0.05,-6.02,-98.5	0/1:-80.1,-13.85,-172	0/1:-31.6,-6.62,-76.01	0/1:-133.6,-16.86,-140	0/0:-0,-10.24,-197.6	0/1:-98.7,-13.85,-146.7	0/1:-94.03,-10.84,-95.2	0/1:-75.13,-10.84,-123.2	0/0:-0,-10.24,-200.5	0/1:-97.2,-16.26,-175.2	0/1:-84.5,-13.25,-164	0/1:-102.5,-10.24,-74	0/1:-152,-16.86,-141.7	0/0:-1.2,-17.46,-312.7	0/1:-91.6,-7.83,-41.5	0/1:-54,-10.84,-152	0/1:-72.4,-7.83,-68
chr11	93678030	T	<INS:ME:Bov-A2>	PASS	TSD=AGGCTGGTCAT;ASSESS=5;INTERNAL=XM_002691559.2,PROMOTER;SVTYPE=Bov-A2;SVLEN=267;MEINFO=Bov-A2,1,268,-;DIFF=1:c9t,a10g,c36g,t45c,c54t,g65c,t90a,a118c,a164c,c167a,g198a,g200c,g219a,c234t,n269;LP=87;RP=124;RA=-0.511;PRIOR=false;SR=63	1/1:-125.3,-9.63,-0.08	0/0:-0.49,-5.42,-92.1	0/0:-0.18,-9.03,-169.5	0/0:-0,-9.03,-180	0/1:-74.7,-7.83,-60.01	0/0:-0,-13.85,-270.4	0/1:-73.2,-15.05,-192.62	0/0:-0,-9.03,-180	0/1:-74,-12.04,-120.38	0/1:-32.4,-6.62,-79.1	0/0:-0,-15.05,-299.3	1/1:-49.2,-4.82,-0.8	0/1:-49.1,-10.84,-121.6	0/0:-0,-8.43,-166	0/1:-46.47,-4.82,-13.2	1/1:-20.2,-3.01,-1.41	1/1:-141.2,-11.44,-0.67	0/0:-0,-9.03,-180	0/0:-0,-14.45,-278.8	0/0:-0,-9.03,-180	0/1:-79.6,-13.85,-139.63	0/1:-12.8,-4.21,-58.43	1/1:-46.2,-3.61,-0.12	1/1:-74.9,-6.02,-0.61	0/1:-31.7,-7.22,-94	0/1:-52.36,-10.24,-111.52	1/1:-121.2,-9.63,-0.1	0/0:-0,-13.85,-266.7	1/1:-133.6,-11.44,-1.52	0/0:-0,-8.43,-166	0/1:-23.4,-9.03,-132.39	0/1:-31.6,-6.02,-72.01	0/1:-73.4,-8.43,-59.61	0/1:-22.6,-4.82,-60.05	0/1:-91.3,-14.45,-156	1/1:-52.8,-4.82,-1.3	0/1:-48.4,-9.63,-106.03	0/0:-0,-10.84,-216
chr11	93929915	A	<INS:ME:Bov-A2>	PASS	TSD=AAAGGACAAAAA;ASSESS=5;INTERNAL=XM_024999769.1,PROMOTER;SVTYPE=Bov-A2;SVLEN=266;MEINFO=Bov-A2,2,268,+;DIFF=1:n1,c9t,g55a,a68g,g88a,a92g,g98a,g104a,c114t,a124c,a187c,a223c,g231a,g254c;LP=61;RP=68;RA=-0.157;PRIOR=false;SR=31	0/0:-0,-16.86,-336	0/0:-0,-4.82,-96	0/0:-0,-17.46,-348	0/0:-0,-3.61,-72	0/1:-100,-15.65,-192	0/0:-0,-12.64,-252	0/0:-0,-17.46,-348	0/0:-0,-15.05,-300	0/1:-120,-10.24,-60	0/0:-0,-7.22,-144	0/0:-0,-20.47,-408	0/1:-92,-12.64,-142.9	0/0:-0,-12.64,-250	0/0:-0,-13.25,-264	0/0:-0,-10.24,-204	0/0:-0,-8.43,-168	0/0:-0,-8.43,-168	0/0:-0,-6.02,-120	0/0:-0,-18.06,-360	0/0:-0,-9.03,-180	0/0:-0,-14.45,-288	0/0:-0,-4.82,-96	0/1:-68,-4.82,-24	0/1:-52,-11.44,-164.4	0/1:-102,-16.86,-216	0/1:-50,-8.43,-107.3	0/0:-0,-12.64,-252	0/0:-0,-11.44,-227.9	0/1:-110,-16.26,-190.8	0/0:-0,-15.05,-300	0/1:-83.5,-10.24,-108	0/0:-0,-12.64,-252	0/0:-0,-12.04,-240	0/0:-0,-13.85,-275.8	0/0:-0,-6.02,-120	0/1:-42,-5.42,-60	0/0:-1.2,-7.83,-133.2	0/0:-0.6,-5.42,-96.6
chr11	94933666	T	<INS:ME:Bov-A2>	PASS	TSD=null;ASSESS=4;INTERNAL=XM_024998568.1,INTRONIC;SVTYPE=Bov-A2;SVLEN=266;MEINFO=Bov-A2,2,268,-;DIFF=0.67:n1,n12,n14,g55a,c74t,g84a,n94,c103t,g108c,g112a,t138c,c218t,g241a,t250a,g254a,c255t;LP=4;RP=4;RA=0;PRIOR=false;SR=4	0/0:-0,-20.47,-408	0/0:-0,-14.45,-274	0/0:-0,-16.26,-323.5	0/0:-0,-9.63,-192	0/0:-0,-9.03,-180	0/0:-0,-12.64,-252	0/0:-0,-12.04,-240	0/0:-0,-9.03,-180	0/0:-0,-16.26,-321.3	0/0:-0,-9.03,-176	0/0:-0,-14.45,-286	0/0:-0,-8.43,-168	0/0:-0,-17.46,-344	0/0:-0,-14.45,-288	0/0:-0,-10.24,-202	0/0:-0,-7.83,-152	0/0:-0,-7.22,-143.9	0/1:-36,-6.02,-84	0/0:-0,-15.05,-300	0/0:-0.6,-5.42,-96.6	0/0:-0,-10.84,-214	0/0:-0,-7.22,-143.6	0/0:-0,-9.03,-180	0/0:-0,-8.43,-164	0/0:-0,-13.85,-268	0/0:-0,-16.86,-328.7	0/0:-0,-9.63,-190	0/0:-0,-9.63,-192	0/0:-0,-15.65,-308	0/0:-0,-12.64,-252	0/0:-0,-9.63,-192	0/0:-0,-18.06,-359.8	0/0:-0,-10.84,-215.4	0/0:-0,-8.43,-168	0/0:-0,-4.82,-96	0/0:-0,-5.42,-105.8	0/1:-47.5,-3.61,-24	0/0:-0,-7.22,-144
chr11	101920634	T	<INS:ME:Bov-A2>	PASS	TSD=CCT;ASSESS=5;INTERNAL=XM_010810432.3,TERMINATOR;SVTYPE=Bov-A2;SVLEN=267;MEINFO=Bov-A2,1,268,-;DIFF=1:g8a,t33c,t67a,a91g,g93a,a94c,c136t,c161g,c234g,g247a;LP=8;RP=11;RA=-0.459;PRIOR=false;SR=6	0/0:-0,-19.27,-384	0/0:-0,-8.43,-168	0/0:-0,-10.24,-202.2	0/0:-0,-9.03,-180	0/0:-0,-11.44,-223.7	0/0:-0,-10.24,-204	0/0:-0,-12.04,-240	0/0:-0.01,-7.83,-151.8	0/0:-0,-10.84,-216	0/0:-0,-9.03,-180	0/0:-0,-8.43,-168	0/0:-0,-4.21,-84	0/0:-0,-9.03,-180	0/0:-0.63,-13.85,-259.8	0/0:-0,-6.02,-120	0/0:-0,-4.21,-84	0/0:-0,-9.63,-192	0/0:-0,-10.84,-216	0/0:-0,-7.22,-144	0/1:-82,-6.62,-36	0/0:-0,-9.63,-192	0/0:-0,-5.42,-108	0/0:-0,-15.65,-312	0/0:-0,-8.43,-168	0/0:-0,-7.83,-156	0/0:-0,-7.83,-156	0/0:-0,-11.44,-228	0/0:-0,-7.22,-144	0/0:-0,-6.62,-132	0/0:-0,-9.63,-192	0/0:-0,-7.83,-156	0/0:-0,-13.25,-264	0/0:-0.13,-9.63,-186.6	0/0:-0,-10.24,-204	0/0:-0,-13.25,-264	0/0:-0,-10.84,-216	0/1:-104,-9.63,-72	0/0:-0,-6.02,-120
chr12	726840	C	<INS:ME:Bov-A2>	PASS	TSD=null;ASSESS=3;INTERNAL=null,null;SVTYPE=Bov-A2;SVLEN=267;MEINFO=Bov-A2,1,268,+;DIFF=0.18:c9a,g13a,c17a,c19t,c46t,c54t,g66a,g73a,n77-133,c162a,c197t,g199a,g202t,g209a,g219a,a223c,g226t,n230-269;LP=4;RP=2;RA=1;PRIOR=false;SR=5	0/1:-46.9,-13.85,-224.4	0/0:-0,-8.43,-168	0/0:-0,-10.84,-216	0/0:-0,-5.42,-108	0/0:-0,-12.64,-252	0/0:-0,-15.65,-312	0/0:-0,-12.04,-240	0/0:-1.93,-13.85,-231.51	0/0:-1.2,-20.47,-384.5	0/0:-0.6,-7.83,-144.6	0/0:-0,-19.87,-396	0/0:-0,-12.64,-252	0/0:-0.6,-8.43,-156.6	0/0:-0.6,-8.43,-156.6	0/1:-70,-10.24,-130	0/0:-0,-6.62,-132	0/0:-0.6,-7.22,-132.6	0/1:-72,-8.43,-96	0/0:-0,-18.06,-356.6	0/0:-0,-6.02,-120	0/0:-0,-16.86,-335.1	0/0:-0,-4.82,-96	0/0:-0,-4.82,-96	0/0:-0,-7.22,-144	0/0:-0,-8.43,-168	0/1:-48,-12.04,-192	0/0:-1.2,-9.03,-157.2	0/0:-0,-8.43,-168	0/0:-0,-15.65,-312	0/0:-0,-16.26,-324	0/0:-0,-10.84,-216	0/0:-1.81,-18.66,-337.81	0/0:-0,-15.05,-300	0/0:-0,-12.04,-240	0/0:-0,-4.21,-84	0/0:-0,-7.83,-156	0/0:-0,-9.63,-192	0/0:-0,-6.62,-132
chr12	3715742	G	<INS:ME:Bov-A2>	PASS	TSD=null;ASSESS=4;INTERNAL=null,null;SVTYPE=Bov-A2;SVLEN=267;MEINFO=Bov-A2,1,268,-;DIFF=0.93:c30t,g55a,c63t,g76c,a80c,c89t,t90g,g98t,c103t,g108c,a109t,g110t,c111t,g112c,i115tt,g172a,c180t,g182a,c189t,c197t,g219a;LP=41;RP=14;RA=1.55;PRIOR=false;SR=4	0/0:-0,-19.27,-381.6	0/0:-0,-13.85,-276	0/0:-0,-10.24,-202.8	0/0:-0,-7.22,-142.3	0/0:-0,-5.42,-108	0/0:-0,-12.04,-236.3	0/0:-0,-14.45,-288	0/0:-0,-12.64,-249.9	0/0:-0,-11.44,-228	0/1:-36,-10.24,-167	0/0:-0,-15.65,-310	0/0:-0.6,-9.03,-165.8	0/0:-0.63,-12.64,-229.3	0/0:-0,-8.43,-168	0/0:-0.6,-11.44,-211	0/0:-0,-6.02,-120	0/0:-0,-9.63,-192	0/0:-0,-9.03,-180	0/0:-0,-16.86,-336	0/0:-0,-7.83,-156	0/0:-0,-13.85,-274	0/0:-0,-6.62,-132	0/0:-0,-8.43,-168	0/0:-0,-7.83,-156	0/0:-0.6,-12.04,-228.6	0/1:-36,-10.24,-164	0/0:-0,-13.85,-274.6	0/0:-0,-10.24,-204	0/0:-0,-12.04,-239.5	0/0:-0,-8.43,-168	0/0:-0,-7.83,-152	0/0:-0,-12.04,-240	0/0:-0,-13.25,-262.7	0/0:-0,-10.24,-200.2	0/0:-0,-7.83,-156	0/0:-0.6,-6.62,-118.2	0/0:-0,-10.84,-215.6	0/0:-0,-6.62,-132
chr12	5882025	C	<INS:ME:Bov-A2>	PASS	TSD=ATCTGAGCCGAC;ASSESS=5;INTERNAL=null,null;SVTYPE=Bov-A2;SVLEN=246;MEINFO=Bov-A2,22,268,-;DIFF=0.92:n1-21,g55a,a68g,a92c,a105g,g112t,a118c,c197t,g216t,c218t,g225a,g256a;LP=272;RP=260;RA=0.065;PRIOR=false;SR=146	1/1:-224.31,-15.05,-1.81	0/1:-248.83,-19.27,-53.71	0/1:-97.9,-15.05,-180	0/1:-79.8,-6.62,-36	0/1:-177,-13.25,-58.1	1/1:-203.2,-12.64,-1.2	0/1:-101.8,-13.85,-156	0/1:-124.4,-18.06,-213.4	0/1:-101.4,-15.65,-190.3	0/1:-128.8,-10.84,-48.7	1/1:-183.6,-12.04,-1.2	0/0:-0,-6.02,-110.6	0/1:-249.37,-16.86,-36.53	1/1:-251.61,-16.86,-1.84	0/1:-42,-7.83,-105.1	1/1:-30,-1.81,-0	1/1:-143.2,-9.63,-1.2	0/1:-81.5,-10.24,-108	0/1:-159.6,-13.25,-71.7	1/1:-120.3,-8.43,-1.2	1/1:-141,-9.63,-1.2	1/1:-60.6,-4.21,-0.05	1/1:-120.5,-7.83,-0.6	0/0:-0,-12.04,-235.7	1/1:-82.6,-5.42,-0.6	0/1:-151.22,-12.04,-49.43	0/1:-155.8,-13.85,-82.4	0/1:-189.9,-13.85,-45	0/1:-81.7,-12.04,-132	0/1:-295.9,-19.87,-43.5	0/1:-161.35,-13.25,-48.33	0/1:-88.5,-12.64,-142.7	1/1:-203.41,-13.85,-1.81	0/1:-112,-18.06,-227.3	1/1:-243.9,-15.05,-0.6	1/1:-69.7,-4.21,-0	1/1:-155.7,-10.84,-1.21	0/1:-83.6,-6.02,-24
chr12	6638256	C	<INS:ME:Bov-A2>	PASS	TSD=null;ASSESS=4;INTERNAL=null,null;SVTYPE=Bov-A2;SVLEN=267;MEINFO=Bov-A2,1,268,+;DIFF=0.46:c54t,g70a,c101t,n166-269;LP=5;RP=8;RA=-0.678;PRIOR=false;SR=11	0/0:-0.6,-14.45,-272.6	0/1:-49.11,-8.43,-89.4	0/0:-0,-9.63,-189.8	0/0:-0,-7.22,-141.8	0/0:-0,-11.44,-226.2	0/1:-40.6,-9.63,-134.8	0/0:-0.61,-9.03,-161.9	0/0:-0.6,-10.24,-191.6	0/0:-0,-7.83,-152.2	0/0:-0,-7.22,-142	0/0:-0,-6.62,-131.4	0/1:-24,-6.62,-108	1/1:-126.8,-7.83,-0.73	0/0:-1.21,-11.44,-194.5	0/0:-1.2,-7.22,-113.9	0/1:-36,-5.42,-72	0/0:-1.2,-7.22,-121.2	0/0:-0,-8.43,-168	0/0:-1.21,-12.64,-218.9	0/0:-0,-5.42,-108	0/0:-1.86,-18.06,-320.11	0/0:-0,-3.01,-59.3	0/1:-21.1,-3.61,-47.4	0/1:-56.8,-9.03,-115.2	0/1:-33.31,-4.21,-37.7	0/1:-34.82,-4.21,-39.4	0/0:-1.2,-12.64,-228.7	0/1:-48,-6.02,-72	0/0:-0,-8.43,-163.3	0/0:-1.21,-10.24,-174.3	0/1:-70.9,-9.63,-110.9	0/1:-70.8,-15.65,-235.5	0/0:-1.2,-10.24,-181.2	0/1:-31.66,-8.43,-125.3	0/0:-0,-10.24,-203.8	0/0:-0.66,-5.42,-91.5	0/0:-1.2,-9.63,-166.3	0/0:-0,-6.62,-132
chr12	7128538	T	<INS:ME:Bov-A2>	PASS	TSD=dAGGATAGCCTAGACTCA;ASSESS=5;INTERNAL=null,null;SVTYPE=Bov-A2;SVLEN=269;MEINFO=Bov-A2,0,269,+;DIFF=1:a49g,c54t,a68g,a91g,a94g,c97t,c103t,c114a,c123g,c175g,g219a,a223c,c230t,g241a,c255t;LP=14;RP=10;RA=0.485;PRIOR=false;SR=6	0/0:-0,-13.25,-263.4	0/0:-0,-13.85,-276	0/0:-0,-9.03,-180	0/0:-0,-8.43,-168	0/0:-0,-10.84,-216	0/0:-0,-16.26,-324	0/0:-0,-9.63,-192	0/0:-0,-14.45,-288	0/0:-0,-18.66,-372	0/0:-0,-4.21,-84	0/0:-0,-12.04,-240	0/0:-0,-10.84,-215.4	0/0:-0,-15.05,-300	0/0:-0,-14.45,-288	0/0:-0,-8.43,-166	0/0:-0,-12.64,-252	0/1:-50,-9.03,-112	0/0:-0,-7.22,-144	0/0:-0,-16.86,-336	0/0:-0,-10.84,-216	0/0:-0,-15.65,-312	0/0:-0,-6.02,-120	0/0:-0,-5.42,-108	0/0:-0,-9.63,-192	0/0:-0,-10.84,-216	0/0:-0,-7.83,-156	0/0:-0,-10.84,-216	0/0:-0,-12.64,-252	0/0:-0,-16.26,-324	0/0:-0,-13.25,-264	0/0:-0,-7.83,-156	0/0:-0,-15.05,-298	0/0:-0,-12.64,-252	0/0:-0,-10.24,-202	0/0:-0,-8.43,-168	0/0:-0,-7.22,-144	0/1:-146.3,-13.85,-100	0/0:-0,-9.03,-180
chr12	12227537	C	<INS:ME:Bov-A2>	PASS	TSD=null;ASSESS=3;INTERNAL=XM_025000022.1,INTRONIC;SVTYPE=Bov-A2;SVLEN=267;MEINFO=Bov-A2,1,268,+;DIFF=0.24:c20t,g52a,g55a,n83-146,g170a,n172,t173c,t176a,c179t,g185a,a187c,g193t,c197t,g199t,g200c,g201a,g211a,c218a,t220c,n222-222,g225t,n232-269;LP=1;RP=3;RA=-1.585;PRIOR=false;SR=4	0/0:-0,-10.24,-204	0/0:-0,-11.44,-228	0/0:-0,-14.45,-288	0/0:-0,-6.62,-130	0/0:-0,-9.03,-178.2	0/0:-0.6,-15.65,-300.6	0/0:-1.2,-12.64,-229.2	0/0:-0.6,-11.44,-216.6	0/0:-0,-9.63,-192	0/0:-0,-6.62,-132	0/0:-0.6,-20.47,-396.6	0/1:-48,-7.22,-96	0/1:-80,-15.65,-226.5	0/0:-1.81,-16.26,-289.81	0/0:-0.6,-6.62,-118.6	0/0:-0.6,-7.83,-144.6	0/0:-0.6,-10.24,-192.6	0/0:-0.6,-12.04,-228.6	0/0:-1.2,-7.22,-121.2	0/1:-60,-12.04,-180	0/0:-1.2,-7.83,-133.2	0/0:-0.6,-2.41,-36.6	0/1:-48,-9.03,-132	0/0:-0,-7.83,-153.9	0/0:-0.6,-9.03,-168.6	0/1:-36,-13.25,-228	0/0:-0,-13.25,-262	0/0:-0.6,-10.24,-192.6	0/0:-0,-12.04,-240	0/0:-1.2,-7.83,-133.2	0/0:-0,-7.83,-156	0/0:-1.21,-11.44,-201.6	0/0:-1.81,-14.45,-249.31	0/1:-60,-9.63,-132	0/1:-24,-6.02,-96	0/0:-0.6,-10.84,-202.8	0/0:-0,-7.22,-144	0/0:-0,-10.24,-204
chr12	13940951	T	<INS:ME:Bov-A2>	PASS	TSD=null;ASSESS=4;INTERNAL=XM_015473798.2,INTRONIC;SVTYPE=Bov-A2;SVLEN=268;MEINFO=Bov-A2,1,269,+;DIFF=0.98:n1,i30c,c37t,g76a,c103t,g112a,t142c,a160g,g195a,c244a,n265-269;LP=361;RP=373;RA=-0.047;PRIOR=false;SR=46	1/1:-259.2,-16.86,-1.21	1/1:-329.6,-20.47,-0.6	1/1:-164.6,-10.24,-0.6	1/1:-296,-17.46,-0	1/1:-298.61,-19.87,-1.81	1/1:-183.2,-12.04,-1.2	0/1:-93.6,-11.44,-108.13	1/1:-227.81,-15.05,-1.81	1/1:-170.6,-10.84,-0.6	0/1:-135.9,-10.84,-40.6	0/1:-162,-12.04,-48	1/1:-80,-4.82,-0	1/1:-340.2,-19.87,-0	1/1:-374.91,-23.48,-1.81	0/1:-234.8,-16.26,-48	0/1:-38.2,-3.61,-24	1/1:-120.6,-7.83,-0.6	0/1:-116,-9.63,-60	1/1:-244.6,-15.05,-0.6	1/1:-162,-9.63,-0	0/1:-90,-13.85,-168	1/1:-110.2,-7.83,-1.2	1/1:-236.6,-14.45,-0.6	0/1:-69.1,-8.43,-82	1/1:-193.3,-12.64,-1.2	1/1:-221.2,-14.45,-1.21	1/1:-239.2,-15.05,-1.2	0/1:-92,-15.05,-192	0/1:-233.5,-19.87,-120	0/1:-286.7,-21.67,-84.05	1/1:-130.2,-8.43,-0.46	1/1:-273.2,-17.46,-1.21	0/1:-130,-12.04,-96	0/1:-120,-14.45,-144	1/1:-221.81,-15.05,-1.81	1/1:-70,-4.21,-0	1/1:-185.2,-12.04,-1.2	1/1:-232.6,-14.45,-0.6
chr12	17476645	T	<INS:ME:Bov-A2>	PASS	TSD=TGTTCTGTTTCTT;ASSESS=5;INTERNAL=null,null;SVTYPE=Bov-A2;SVLEN=251;MEINFO=Bov-A2,17,268,+;DIFF=0.7:n1-16,a42g,a43c,g55a,g73t,g84t,n89,a91g,g98a;LP=11;RP=7;RA=0.652;PRIOR=false;SR=28	0/0:-0,-10.24,-201.7	0/0:-0,-7.83,-148.4	0/0:-0,-5.42,-106	0/0:-0,-11.44,-222.2	0/0:-0,-9.63,-190.6	0/0:-0,-12.04,-232.2	0/0:-0,-10.84,-213.2	0/0:-0,-12.04,-236.4	0/0:-0,-6.62,-124.8	0/0:-0,-9.03,-176.4	0/0:-0,-11.44,-225.7	0/1:-48,-6.02,-72	0/0:-0,-11.44,-218	0/0:-0,-7.83,-153.7	0/0:-0,-8.43,-166	0/0:-0,-7.83,-156	0/0:-0,-10.84,-207.5	0/0:-0,-15.05,-292.7	0/0:-0,-12.64,-243.2	0/0:-0.7,-8.43,-149.4	0/0:-0,-13.85,-272.6	0/0:-0,-4.21,-84	0/0:-0,-13.85,-269.8	0/0:-0,-6.02,-118	0/0:-0,-10.24,-198.5	0/1:-60,-7.22,-84	0/0:-0,-7.83,-156	0/0:-0,-9.03,-178.1	0/0:-0,-9.03,-178	0/0:-0,-11.44,-225.1	0/0:-0,-12.04,-226.4	0/0:-0,-11.44,-225.5	0/0:-0,-12.64,-249.2	0/0:-0,-9.03,-175.3	0/0:-0,-13.25,-256.2	0/0:-0.03,-7.83,-147.8	0/1:-102.6,-6.62,-22.13	0/0:-0,-7.83,-154.8
chr12	17703108	A	<INS:ME:Bov-A2>	PASS	TSD=AAAAAAAAA;ASSESS=5;INTERNAL=null,null;SVTYPE=Bov-A2;SVLEN=266;MEINFO=Bov-A2,2,268,+;DIFF=1:n1,t33c,c54t,a92g,g99a,c103t,i115ttcact,a152c,g198a,g219a,g227a,c230t;LP=123;RP=94;RA=0.388;PRIOR=false;SR=6	0/0:-0.6,-16.86,-322.6	0/0:-0,-8.43,-168	0/1:-84.01,-15.05,-209.5	0/0:-0,-3.01,-60	0/0:-1.33,-17.46,-319.8	0/0:-0,-15.65,-308.4	0/0:-0.6,-13.85,-264.6	0/0:-0.63,-13.25,-247.8	0/0:-0,-16.26,-324	0/0:-0,-7.83,-154	0/0:-1.2,-15.05,-276.4	0/0:-0,-12.04,-240	0/0:-0,-10.24,-204	0/1:-70.4,-12.64,-180	0/0:-0,-10.24,-197.1	0/0:-0,-6.02,-120	0/0:-0,-7.22,-144	0/0:-0,-1.2,-24	0/1:-36,-13.25,-227.9	0/0:-0.61,-10.24,-188.4	0/0:-1.2,-14.45,-264.7	0/0:-0,-4.21,-84	0/0:-0,-3.61,-72	0/0:-0,-10.84,-214	0/0:-0,-9.63,-192	0/0:-0,-4.82,-96	0/0:-0.61,-14.45,-270.4	0/0:-0,-16.86,-336	0/0:-0,-9.63,-192	0/0:-0.6,-13.85,-262.6	0/0:-0,-10.24,-202	0/0:-0.6,-15.05,-288.6	0/0:-0,-12.04,-240	0/0:-1.2,-18.66,-347.2	0/0:-0,-2.41,-48	0/0:-0,-12.04,-237.6	0/0:-0,-6.62,-132	0/0:-0,-6.62,-132
chr12	18599465	G	<INS:ME:Bov-A2>	PASS	TSD=AAGAATACTGGAGTGG;ASSESS=5;INTERNAL=XR_003037617.1,INTRONIC;SVTYPE=Bov-A2;SVLEN=267;MEINFO=Bov-A2,1,268,+;DIFF=0.32:c9a,c17a,n30,g55a,g76c,n82-132,g172a,g183a,c197t,g198a,g219a,g231a;LP=15;RP=22;RA=-0.553;PRIOR=false;SR=77	0/1:-82.2,-12.64,-161.6	0/1:-32,-4.82,-52.3	0/1:-72,-10.84,-143.1	0/1:-48.05,-5.42,-53	0/1:-46.03,-10.84,-155.9	0/1:-44,-6.62,-81.5	0/1:-56.44,-9.63,-121.7	0/1:-84.13,-9.63,-96.8	0/0:-1.21,-13.85,-239.1	0/1:-62,-6.62,-54	0/0:-0.3,-8.43,-156	0/1:-36,-6.02,-79	0/1:-196.8,-17.46,-140	0/0:-0.6,-7.22,-132.6	0/1:-41,-9.63,-140.6	0/0:-0.6,-3.61,-53.8	0/0:-0,-10.84,-216	0/1:-92.6,-12.64,-155.1	0/1:-34,-8.43,-123.9	0/1:-104,-9.03,-72	0/1:-106,-19.27,-267.5	0/1:-22,-6.02,-82.6	0/1:-82,-7.22,-60	0/1:-68,-9.03,-98	0/1:-46,-5.42,-56.6	0/0:-1.81,-13.85,-238.81	0/1:-48,-10.84,-163.9	0/1:-84.03,-10.84,-120.9	0/1:-101.16,-14.45,-168.8	0/1:-31.9,-11.44,-188.1	0/1:-34,-9.03,-144	0/1:-124.4,-15.65,-178.22	0/1:-58.04,-10.24,-137.7	0/1:-46,-12.64,-195.7	0/1:-171.6,-15.65,-118.7	0/1:-34,-7.83,-114.9	0/0:-0,-9.03,-180	0/1:-86.6,-8.43,-72.13
chr12	22216488	A	<INS:ME:Bov-A2>	PASS	TSD=null;ASSESS=3;INTERNAL=null,null;SVTYPE=Bov-A2;SVLEN=260;MEINFO=Bov-A2,9,269,-;DIFF=0.27:c9a,g40t,a41t,t50c,c63a,n73-269;LP=15;RP=10;RA=0.585;PRIOR=false;SR=22	0/0:-0,-6.62,-132	0/1:-65.7,-7.22,-72	0/0:-0,-8.43,-168	0/0:-1.2,-9.63,-169	0/0:-0,-3.61,-72	0/0:-0,-4.82,-96	0/0:-0,-8.43,-168	0/0:-0,-3.01,-60	0/0:-0,-12.64,-249.1	0/0:-0,-12.64,-248	0/0:-0,-5.42,-105	0/1:-102,-7.22,-36	0/0:-0,-11.44,-224.6	0/0:-0,-9.03,-180	0/0:-0,-9.03,-178	0/0:-0,-4.82,-96	0/0:-0.6,-7.83,-144.6	0/0:-0,-15.05,-300	0/0:-0,-10.24,-204	0/0:-1.2,-9.63,-169.2	0/0:-0,-7.22,-143.6	0/0:-0,-4.82,-96	0/0:-0,-13.85,-276	1/1:-76.9,-4.82,-0.6	0/0:-0,-8.43,-168	0/1:-102.9,-14.45,-168	0/0:-0,-6.02,-120	0/0:-0,-12.04,-240	0/0:-0,-6.02,-120	0/0:-0,-7.83,-156	0/0:-0,-7.22,-144	0/0:-0,-6.02,-120	0/0:-0,-6.62,-132	0/0:-0,-6.62,-132	0/0:-0,-11.44,-228	0/0:-0.6,-9.03,-168.6	1/1:-119.5,-6.02,-0	0/0:-0,-6.02,-120
chr12	23616709	G	<INS:ME:Bov-A2>	PASS	TSD=TCATAGTGACTTG;ASSESS=5;INTERNAL=null,null;SVTYPE=Bov-A2;SVLEN=267;MEINFO=Bov-A2,1,268,+;DIFF=1:c32t,a42g,a43g,a44g,c54t,a57g,a68g,c71t,n91,a92g,g98a,a100g,a109g,a124g,t142c,a184g,c197t,g202a,c221t,g228a,c240t,g247a;LP=21;RP=16;RA=0.392;PRIOR=false;SR=14	0/0:-0,-11.44,-228	0/1:-86.2,-8.43,-58.43	0/0:-0,-10.24,-204	0/0:-0,-3.61,-72	0/0:-0,-12.64,-252	0/0:-0,-15.65,-312	0/0:-0,-15.05,-298	0/0:-0,-18.06,-358	0/0:-0,-17.46,-348	0/0:-0,-8.43,-168	0/0:-0,-22.28,-438	0/0:-0,-10.24,-204	0/0:-0,-9.63,-192	0/0:-0,-17.46,-348	0/0:-0,-10.24,-204	0/0:-0,-7.22,-144	0/0:-0,-8.43,-168	0/0:-0,-6.62,-132	0/0:-0,-22.28,-444	0/0:-0,-4.82,-96	0/0:-0,-19.27,-384	0/0:-0,-1.2,-24	0/0:-0,-2.41,-48	0/0:-0,-12.64,-252	0/1:-152.4,-13.25,-66.8	0/0:-0,-15.65,-312	0/0:-0,-9.63,-192	0/0:-0,-13.25,-262.5	0/0:-0,-16.26,-324	0/0:-0,-11.44,-228	0/1:-60,-7.22,-68	0/0:-0,-16.86,-336	0/0:-0,-14.45,-288	0/0:-0.02,-9.03,-171.3	0/0:-0,-8.43,-168	1/1:-116.8,-7.22,-0.6	0/0:-0,-6.62,-131.8	0/0:-0,-6.02,-120
chr12	45322032	T	<INS:ME:Bov-A2>	PASS	TSD=null;ASSESS=3;INTERNAL=null,null;SVTYPE=Bov-A2;SVLEN=267;MEINFO=Bov-A2,1,268,+;DIFF=0.09:c9a,c17a,c30t,c54t,g85a,n102-150,g172a,c189t,g193t,g198a,g200a,g208a,t220g,g231a,c255t,c258t;LP=8;RP=6;RA=0.415;PRIOR=false;SR=9	0/0:-0.6,-15.05,-288.6	0/0:-0.13,-11.44,-212.3	0/0:-0.17,-8.43,-160.5	0/0:-0,-9.03,-180	0/0:-0,-10.84,-215.7	0/0:-0,-12.04,-240	0/0:-0,-10.24,-199.6	0/0:-0,-11.44,-225	0/0:-0,-14.45,-286	0/0:-0.04,-10.24,-189.2	0/0:-0,-10.84,-215.1	0/1:-16,-5.42,-84	0/0:-0,-16.26,-317.1	0/0:-0,-8.43,-165.6	0/0:-0,-9.03,-177.8	0/0:-0,-7.83,-155.3	0/0:-0,-6.62,-132	0/0:-0,-7.83,-156	0/0:-0,-15.05,-298.9	0/0:-0,-13.25,-264	0/0:-0,-16.26,-324	0/0:-0,-8.43,-157.8	0/0:-0,-14.45,-288	0/0:-0,-10.24,-200	0/0:-0.6,-10.84,-202.8	0/0:-0,-15.05,-282.2	0/0:-0,-7.22,-144	0/0:-0,-11.44,-228	0/0:-0,-12.64,-245.3	0/0:-0.01,-13.85,-265.6	0/0:-0.22,-16.86,-326.4	0/0:-0,-14.45,-286	0/0:-0,-6.62,-132	0/0:-0,-8.43,-168	0/0:-0,-16.26,-324	0/0:-0,-8.43,-168	0/0:-0,-11.44,-228	0/0:-0,-9.63,-192
chr12	49351299	C	<INS:ME:Bov-A2>	PASS	TSD=ATAAAGAACATATAAGAC;ASSESS=5;INTERNAL=null,null;SVTYPE=Bov-A2;SVLEN=263;MEINFO=Bov-A2,5,268,+;DIFF=0.41:n1-4,g55a,a68g,c74t,c89t,t90a,c97a,g104a,g108t,a109t,n111,n113-115,n117,t126a,n130,g193t,c197t,g198a,g200a,g204a,c205a,g211a,g213c,g216a,c218a,g225a,n229,g231a,c232t,n233,c234g,g236a,n239-239,n241,n251-269;LP=1;RP=5;RA=-2.322;PRIOR=false;SR=11	0/0:-0,-12.04,-235.4	0/0:-0,-10.84,-207	0/0:-0.03,-18.06,-352.8	0/0:-0,-7.22,-144	0/0:-0.6,-9.63,-177.9	0/0:-0.6,-10.24,-190.8	0/0:-0.6,-12.64,-235.2	0/0:-0.6,-13.85,-256.8	0/0:-0,-15.65,-308.1	0/0:-0,-7.83,-150.9	0/0:-0,-9.03,-174	0/0:-0,-10.24,-197.7	0/0:-0,-14.45,-284.8	0/0:-0,-11.44,-226	0/0:-0,-6.62,-126	0/0:-0,-1.81,-32.7	0/0:-0,-6.62,-132	0/0:-0,-5.42,-106	0/0:-1.2,-17.46,-312	0/0:-0,-7.22,-144	0/0:-0.61,-10.84,-193.2	0/1:-32.7,-6.62,-88	0/0:-0,-3.61,-70.4	0/0:-0,-7.22,-138	0/0:-0,-7.22,-142	0/0:-0,-12.04,-230.8	0/0:-0.6,-12.64,-237.7	0/0:-0,-12.64,-245.8	0/0:-0,-10.24,-201.5	0/1:-72,-13.25,-188	0/0:-0,-14.45,-268.4	0/0:-0.22,-13.85,-266.3	0/0:-0,-10.24,-200	0/0:-0.68,-15.05,-277.6	0/0:-0,-6.62,-132	0/0:-0,-3.01,-60	0/0:-0,-9.63,-190.3	0/0:-0,-6.02,-120
chr12	49397463	C	<INS:ME:Bov-A2>	PASS	TSD=dCCCCAATGTTCATCGCAG;ASSESS=5;INTERNAL=null,null;SVTYPE=Bov-A2;SVLEN=267;MEINFO=Bov-A2,1,268,+;DIFF=0.8:c9t,c17a,c18t,n21,g35a,a44g,g84a,c87t,g88a,a137c,a203t,g212t,c218t,c230t,c255t,g265a;LP=5;RP=20;RA=-2;PRIOR=false;SR=7	0/0:-1.2,-13.25,-214.1	0/0:-0.02,-7.22,-112.2	0/0:-0.12,-6.62,-100.6	0/0:-0,-6.62,-113.7	0/0:-0.04,-12.04,-197	0/0:-0.61,-8.43,-115.5	0/0:-0.26,-10.24,-159.7	0/0:-0,-5.42,-84.7	0/0:-0.01,-9.63,-164.4	0/0:-0.03,-6.02,-83.3	0/1:-20,-6.62,-91.2	0/0:-0.06,-2.41,-32.4	0/0:-0,-12.64,-204.7	0/0:-0,-8.43,-143.8	0/0:-0.01,-4.82,-65.5	0/0:-0,-4.21,-62.3	0/0:-0,-9.63,-159.7	0/0:-0,-7.83,-136.3	0/0:-0.44,-10.84,-178.4	0/0:-0,-3.61,-65.6	0/0:-0.64,-8.43,-133.4	0/0:-0,-6.62,-102.6	0/0:-0,-14.45,-253.6	0/0:-0.46,-6.02,-78.9	0/0:-0.06,-6.62,-100.7	0/0:-0.02,-10.24,-169.3	0/0:-0,-4.82,-76.1	0/1:-29.6,-12.64,-187.8	0/0:-1.22,-10.84,-159.6	0/1:-39.6,-10.84,-145.1	0/1:-16.81,-6.62,-75.1	0/0:-0.6,-10.84,-176.7	0/0:-1.23,-8.43,-121.8	0/0:-0,-4.82,-81	0/0:-0,-10.84,-188.9	0/0:-0.01,-7.22,-122.9	0/0:-0,-6.62,-107.4	0/0:-1.55,-10.84,-151.2
chr12	50019925	T	<INS:ME:Bov-A2>	PASS	TSD=null;ASSESS=3;INTERNAL=null,null;SVTYPE=Bov-A2;SVLEN=267;MEINFO=Bov-A2,1,268,-;DIFF=1:g39a,g73t,a100g,c106t,g198a,g200a,g208a,t210a,g211a,g219c,a223c,g226c,c240t,a253g;LP=40;RP=15;RA=1.415;PRIOR=false;SR=25	0/0:-0,-18.06,-360	0/0:-1.2,-8.43,-145.2	0/0:-1.81,-19.27,-349.81	0/0:-0,-6.62,-132	0/0:-0,-10.84,-216	0/0:-0,-13.25,-264	0/0:-0,-13.85,-276	0/0:-0,-13.85,-276	0/0:-0,-13.25,-264	0/0:-0,-4.82,-96	0/0:-0,-18.66,-372	0/0:-0,-11.44,-228	0/0:-0,-12.04,-240	0/0:-0,-15.65,-309	0/0:-0,-10.84,-216	0/0:-0,-5.42,-108	0/1:-44,-10.24,-156	0/0:-0,-7.22,-144	0/0:-0,-18.06,-360	0/0:-0.6,-9.03,-168.6	0/0:-0,-21.07,-420	0/0:-0,-2.41,-48	0/0:-0,-4.21,-84	0/0:-1.2,-11.44,-205.2	0/1:-32,-10.84,-178.8	0/1:-32,-9.63,-156	0/0:-0,-13.25,-264	0/0:-0.13,-10.24,-198.6	0/0:-0,-12.64,-250	0/0:-0,-16.26,-324	0/0:-0,-6.62,-132	0/0:-0,-15.65,-312	0/0:-0,-12.64,-252	0/0:-0,-12.64,-252	0/0:-0,-1.81,-36	0/0:-0,-9.03,-180	0/0:-0,-7.22,-144	0/0:-0.6,-15.05,-288.6
chr12	52659689	T	<INS:ME:Bov-A2>	PASS	TSD=null;ASSESS=3;INTERNAL=null,null;SVTYPE=Bov-A2;SVLEN=268;MEINFO=Bov-A2,1,269,-;DIFF=0.71:n1,c25t,c32t,g61a,t90a,a91c,c103t,i109a,c111t,n117-156,a160c,n164,n168,n170,g172a,t173c,n174-175,n185,g193a,g200a,g204a,g211a,c218a,t222c,c246t,c255t;LP=166;RP=154;RA=0.108;PRIOR=false;SR=134	0/1:-64,-12.64,-180	0/1:-155.3,-12.04,-59.8	0/1:-102,-9.03,-72	0/1:-124,-10.84,-84	0/1:-62,-10.84,-144	0/1:-156,-12.04,-71.3	0/1:-97.6,-12.64,-144	0/1:-82,-6.62,-48	0/0:-0,-14.45,-288	0/1:-108.3,-7.83,-36	0/1:-97.2,-12.64,-144	1/1:-123,-7.83,-0.6	0/0:-0,-13.85,-276	0/1:-94,-8.43,-60	0/0:-0,-9.03,-180	0/0:-0,-9.03,-180	0/1:-102,-8.43,-60	0/1:-82,-8.43,-84	0/1:-160,-12.64,-72	0/1:-80,-13.25,-180	0/0:-0,-9.03,-179.8	0/0:-0,-5.42,-108	1/1:-139.2,-9.03,-1.2	1/1:-101.2,-7.22,-1.2	1/1:-253.81,-16.26,-1.81	1/1:-269.91,-17.46,-1.81	0/1:-74,-9.63,-108	0/1:-238,-18.06,-92	0/1:-84,-9.63,-96	0/1:-116,-8.43,-36	1/1:-204.6,-12.64,-0.6	0/1:-212,-15.05,-60	0/1:-106,-11.44,-106	0/1:-98,-7.22,-36	1/1:-162,-9.03,-0	1/1:-121.2,-7.83,-1.2	1/1:-211.81,-13.85,-1.81	1/1:-198.6,-11.44,-0.6
chr12	58224794	T	<INS:ME:Bov-A2>	PASS	TSD=null;ASSESS=3;INTERNAL=null,null;SVTYPE=Bov-A2;SVLEN=250;MEINFO=Bov-A2,18,268,+;DIFF=0.66:n1-17,t50c,g58a,c87t,g98a,g104a,t129c,t142c,c179t,n198-269;LP=10;RP=3;RA=1.737;PRIOR=false;SR=5	0/1:-48,-4.82,-48	0/1:-60,-4.82,-36	0/0:-0.6,-6.62,-120.6	0/0:-0,-1.2,-24	0/0:-0,-7.83,-156	0/0:-0.6,-9.63,-174.7	0/0:-0,-14.45,-286	0/0:-0,-15.65,-309.1	0/0:-0,-15.65,-312	0/0:-0.6,-9.03,-168.6	0/0:-0,-13.25,-262.6	0/0:-0.6,-6.62,-118.6	0/0:-0,-10.24,-200.4	0/0:-0.6,-11.44,-216.6	0/0:-0.6,-7.22,-132.6	0/1:-72,-4.82,-24	0/0:-0,-7.83,-156	0/0:-0,-2.41,-46	0/0:-0.6,-4.82,-81.9	0/0:-0,-5.42,-108	0/1:-72,-5.42,-32.2	0/0:-0,-1.2,-24	0/0:-0,-5.42,-108	0/0:-0.6,-6.62,-119.1	0/0:-0.6,-6.02,-108.6	0/0:-0,-1.81,-36	0/0:-0.6,-10.24,-192.6	0/0:-0.6,-1.81,-24.6	0/0:-0,-16.26,-319	0/1:-36,-6.02,-84	0/0:-0.6,-3.01,-48.6	0/0:-1.2,-10.84,-193.2	0/0:-1.2,-10.84,-190.2	0/0:-0.6,-1.81,-24.6	0/0:-0,-3.01,-60	0/0:-0,-6.62,-132	0/0:-0,-6.62,-132	0/0:-0,-7.22,-144
chr12	64257409	C	<INS:ME:Bov-A2>	PASS	TSD=GAGGTCTCAGGC;ASSESS=5;INTERNAL=null,null;SVTYPE=Bov-A2;SVLEN=266;MEINFO=Bov-A2,2,268,-;DIFF=0.99:n1,c54t,a68g,c117t,a137c,t142c,c191t,g198c,g211a,c218t,g226a,c230t,c240t,n269;LP=257;RP=254;RA=0.017;PRIOR=false;SR=57	0/1:-120.07,-15.65,-138.81	1/1:-198,-14.45,-0.62	1/1:-113.4,-8.43,-1.21	1/1:-136.2,-10.24,-0.95	1/1:-227.4,-15.65,-1.75	0/0:-0,-12.04,-240	0/1:-79.18,-12.64,-120.43	0/1:-47.3,-9.63,-120.75	1/1:-163.9,-12.04,-1.56	1/1:-98.7,-7.83,-1.33	1/1:-263.1,-18.06,-0.92	0/1:-58.4,-7.83,-36.32	1/1:-205,-15.05,-1.02	1/1:-229.1,-15.05,-1.21	0/1:-91.3,-10.84,-83.85	0/1:-35.8,-4.21,-17.88	0/1:-147.26,-11.44,-31.29	1/1:-109.3,-7.22,-0.6	0/1:-102.37,-15.05,-163.35	0/0:-0,-7.83,-156	0/1:-56.1,-13.25,-180.34	1/1:-44.1,-3.01,-0.69	0/1:-69.3,-6.62,-36.24	0/1:-67.4,-7.83,-26.72	0/1:-91.1,-13.25,-132.13	0/1:-98.3,-10.84,-82.4	1/1:-104.6,-7.83,-1.65	0/1:-160,-14.45,-55.28	0/0:-0,-13.25,-264	1/1:-253.7,-16.26,-0.18	0/0:-0,-9.03,-179.5	0/1:-156.06,-12.04,-54.6	0/1:-174.92,-13.25,-18.92	1/1:-144.4,-10.84,-1.81	0/1:-117.4,-10.84,-61.25	1/1:-149.4,-9.63,-0.1	1/1:-251.81,-18.66,-2.28	0/0:-0,-10.84,-216
chr12	70211107	G	<INS:ME:Bov-A2>	PASS	TSD=TTTTTAATTTACTTTAG;ASSESS=5;INTERNAL=XM_025000199.1,INTRONIC;SVTYPE=Bov-A2;SVLEN=269;MEINFO=Bov-A2,0,269,+;DIFF=1:t50a,g55a,g69c,g70t,g98a,a100g,g108a,g112a,t126a,c180t,g198a,g200a,g208a,g216a,g231t,g241a;LP=53;RP=50;RA=0.084;PRIOR=false;SR=16	0/1:-67.16,-19.27,-280.52	0/1:-43.08,-16.26,-231.87	0/1:-48.01,-20.47,-323.62	0/0:-0.6,-4.82,-84.6	0/0:-1.21,-17.46,-313.9	0/0:-0.4,-8.43,-113.9	0/1:-78.03,-25.29,-379.56	0/0:-2.42,-21.07,-355.11	0/0:-0.03,-11.44,-205.2	0/0:-1.81,-13.85,-223.61	0/1:-96.6,-20.47,-239.16	0/0:-1.64,-11.44,-174.3	0/0:-0.66,-16.86,-296.5	0/1:-77.73,-23.48,-336.71	0/1:-54.17,-10.84,-110.56	0/1:-72,-10.84,-132.4	0/0:-0.73,-12.64,-227.9	0/0:-0,-12.04,-239.5	0/1:-45.36,-19.27,-297.9	0/0:-1.51,-3.61,-45.5	0/1:-57.1,-16.26,-247.5	0/1:-31.4,-7.22,-100.1	0/0:-0.6,-3.01,-48.4	0/0:-0.09,-11.44,-186.8	0/1:-33.23,-12.64,-169.03	0/0:-0.69,-17.46,-290.2	0/0:-1.9,-26.49,-465.3	0/1:-60.03,-14.45,-211.3	0/1:-59.31,-12.04,-126.4	0/0:-1.75,-21.67,-351.1	0/1:-51.33,-9.63,-110	0/0:-1.21,-26.49,-486.7	0/1:-88.73,-27.69,-435.42	0/0:-1.96,-15.65,-253.71	0/0:-0,-3.61,-71.8	0/1:-50.53,-13.25,-180.98	0/0:-0,-16.86,-331.5	0/1:-41.29,-10.24,-136.23
chr12	70532935	A	<INS:ME:Bov-A2>	PASS	TSD=null;ASSESS=4;INTERNAL=null,null;SVTYPE=Bov-A2;SVLEN=264;MEINFO=Bov-A2,5,269,+;DIFF=1:c54t,a68t,c87t,a92g,g98a,a118g,c162t,a169t,c197t,g219a,g231t,g241a,c246t,g251a,a253c,t260a;LP=81;RP=60;RA=0.433;PRIOR=false;SR=25	0/0:-0,-29.5,-586	1/1:-125.9,-12.04,-2.44	0/1:-73,-16.26,-175.92	0/1:-121.6,-21.67,-262.02	0/0:-0,-24.08,-480	0/0:-0.3,-10.84,-207	0/1:-65.9,-35.52,-593.84	0/0:-0,-22.28,-441.9	0/0:-0,-14.45,-284.1	0/1:-54.32,-23.48,-351.25	0/1:-54.6,-26.49,-428.02	0/0:-0,-13.25,-262	0/1:-133.72,-28.3,-345.68	0/1:-45.6,-19.87,-322.12	0/0:-0,-9.63,-190.1	0/0:-0,-10.84,-216	0/0:-0,-12.64,-252	0/0:-0,-18.66,-372	0/0:-1.89,-21.67,-397.7	0/0:-0,-14.45,-288	0/0:-0,-14.45,-285.8	0/0:-0,-15.05,-298.3	0/0:-0,-12.04,-239.2	0/0:-0,-17.46,-347.9	0/0:-0,-18.06,-359.6	0/1:-82.4,-18.06,-192.38	0/0:-0,-22.28,-444	0/0:-0,-7.22,-144	0/1:-63.5,-16.86,-239.28	0/0:-0,-15.05,-300	1/1:-34.6,-3.01,-0.13	0/0:-0,-23.48,-468	0/0:-0,-17.46,-348	0/0:-0,-24.08,-480	0/0:-0,-15.05,-298	0/1:-26.6,-7.83,-108.02	0/0:-0.35,-15.65,-282.8	0/1:-93.8,-15.05,-119.96
chr12	71165934	T	<INS:ME:Bov-A2>	PASS	TSD=null;ASSESS=4;INTERNAL=XM_025000204.1,INTRONIC;SVTYPE=Bov-A2;SVLEN=267;MEINFO=Bov-A2,1,268,-;DIFF=0.99:g4t,t33c,g39a,g88a,a92c,c97t,c101t,g112a,n126,t127c,t128a,t129c,d131-142,c197t,g208a,c218t,g231a,g247t,c255t,n269;LP=39;RP=60;RA=-0.621;PRIOR=false;SR=13	0/1:-14.9,-7.83,-105.24	0/0:-1.87,-18.66,-247.7	0/0:-0,-16.86,-333.9	0/0:-0.1,-10.84,-199	0/1:-37.74,-18.06,-257.95	0/1:-41.92,-17.46,-248.71	0/0:-0.6,-7.22,-132.6	0/1:-22.11,-10.24,-120.22	0/0:-0.18,-16.86,-288.8	0/1:-16.23,-13.25,-199.55	0/0:-1.2,-7.22,-118.9	0/0:-1.2,-10.24,-146.3	0/0:-1.23,-18.06,-293.2	0/0:-0,-9.03,-180	0/0:-0.6,-4.21,-63.7	0/0:-0.03,-3.01,-55.2	0/1:-37.21,-11.44,-159.42	0/0:-0.2,-2.41,-21.8	0/1:-23.6,-9.03,-124.5	0/1:-33.81,-8.43,-87.81	0/0:-0.06,-18.66,-346.7	0/0:-0.01,-3.61,-61.2	0/1:-49.6,-7.22,-60.14	0/0:-1.2,-1.2,-1.2	0/1:-39.92,-12.04,-131.92	0/0:-1.2,-18.66,-336.8	0/0:-0.6,-15.05,-275	0/0:-0.15,-21.07,-387.6	0/0:-1.2,-12.64,-217.1	0/1:-44.34,-19.87,-275.31	0/0:-1.27,-22.28,-361.4	0/0:-2.03,-20.47,-363.81	0/1:-27.42,-13.25,-180.69	0/1:-29.2,-16.26,-247.96	0/1:-96.07,-24.08,-261.64	0/1:-25.09,-7.22,-70.33	0/1:-15.3,-4.82,-60.03	0/0:-0,-11.44,-217.4
chr12	71243191	A	<INS:ME:Bov-A2>	PASS	TSD=null;ASSESS=3;INTERNAL=XM_025000204.1,PROMOTER;SVTYPE=Bov-A2;SVLEN=267;MEINFO=Bov-A2,1,268,-;DIFF=1:c54t,t81c,t90a,g178t,c197t,t210c,g211a,g219a,g241a,c266t;LP=69;RP=20;RA=1.787;PRIOR=false;SR=16	0/0:-1.36,-24.08,-400.9	0/0:-0.79,-39.74,-678.3	0/0:-0.03,-18.66,-358.7	0/0:-0,-15.05,-294.9	0/0:-0.19,-24.68,-460.8	0/0:-0.73,-15.65,-265.9	0/0:-0,-22.28,-426	0/0:-0,-12.04,-238	0/0:-1.13,-20.47,-364.8	0/0:-0.01,-10.24,-188.7	0/0:-0.13,-17.46,-326.4	0/0:-2.03,-26.49,-434.6	0/0:-2.15,-52.98,-933.1	0/0:-0.6,-11.44,-214.3	0/0:-0,-18.06,-346.9	0/0:-0.84,-12.64,-223	0/0:-0.1,-18.66,-356.4	0/0:-0.7,-16.26,-293.5	0/0:-0.42,-45.15,-820.9	0/0:-0.31,-20.47,-368.3	0/0:-0.13,-23.48,-448.1	0/0:-0.06,-8.43,-131.2	0/0:-0.01,-21.67,-392.5	0/0:-0,-22.28,-442	0/1:-35.06,-16.26,-234.67	0/1:-34.39,-15.05,-232.11	0/0:-1.31,-34.92,-632.2	0/0:-0.01,-29.5,-552.7	0/0:-0.17,-19.87,-377.1	0/0:-0.53,-19.87,-362.9	0/0:-0.11,-21.67,-371.6	0/0:-0,-21.07,-407.6	0/0:-0.83,-28.9,-484.7	0/0:-0.33,-40.94,-772.3	0/0:-0.01,-26.49,-478.2	0/0:-0.13,-10.84,-187.3	0/0:-1.2,-25.89,-472.1	0/0:-0.69,-20.47,-396.2
[truncated: 637 more rows]

## Sheet: BovB variants
Chromosome	Position	Reference allele	Variant type	Filter	Info	Angus4	Ankole4	BL3	Bashan3	Beefmaster2	Braunvieh1	Charolais2	Chianina2	Corriente4	Devon	Gelbvieh4	Gir1	Hanwoo8	Hereford6	Holstein	Jersey	Jian4	Kazakh3	Limousin2	Luxi1	MaineAnjou4	Mishima	Mongolian4	Nelore4	Nganda	Nsongora	RedAngus2	Salers1	SantaGertrudis2	Shorthorn4	ShorthornZebu1	Simmental5	Tarentaise1	TexasLonghorn4	Tibetan9	Weining3	Wenshan7	Yanbian
[truncated: 1,782 more rows]

[truncated: 1 more sheets: MER41_BT variants]
