# Supplementary material for: Ruminant-specific retrotransposons shape regulatory evolution of bovine immunity
Source: HighWire-hosted journal article supplement (doi:10.1101/gr.276241.121), 2022-08-01
Supplement: Supplemental_Table_S15.xlsx [file Supplemental_Table_S15.xlsx]

## Sheet: Description
Supplemental Table S15
Absolute distance for epigenetic-marked Bov-A2 variants to nearest gene transcriptional start site (TSS)
All gene TSSs within 250kb are included
For more information see Methods
Description of columns:
Chromosome	Chromosome
Start position	Variant start position
End position	Variant end position
Info	Summary of variant including length of deletion, end coordinate, etc.
Angus4 ... Yanbian	Genotypes for each sample. "0/0" = homozygous for reference allele (no deletion), "0/1" = heterozygous, "1/1/" = homozygous for variant allele (deletion)
Gene chromosome	Gene chromosome
Gene start	Gene transcriptional start site
Gene end	Gene transcriptional start site +1
Gene RefSeq ID	RefSeq gene ID
Gene name	Gene name
Absolute distance to gene TSS	Distance from variant to gene TSS

## Sheet: Epigenetic Bov-A2 deletions
Chromosome	Start position	End position	Info	Angus4	Ankole4	BL3	Bashan3	Beefmaster2	Braunvieh1	Charolais2	Chianina2	Corriente4	Devon	Gelbvieh4	Gir1	Hanwoo8	Hereford6	Holstein	Jersey	Jian4	Kazakh3	Limousin2	Luxi1	MaineAnjou4	Mishima	Mongolian4	Nelore4	Nganda	Nsongora	RedAngus2	Salers1	SantaGertrudis2	Shorthorn4	ShorthornZebu1	Simmental5	Tarentaise1	TexasLonghorn4	Tibetan9	Weining3	Wenshan7	Yanbian	Gene chromosome	Gene start	Gene end	Gene RefSeq ID	Gene name	Gene name	Absolute distance to gene TSS
chr1	56604518	56604784	SVTYPE=Bov-A2;END=56604784;SVLEN=266;ADJLEFT=56604518;ADJRIGHT=56604784	0/0:-0,-12.04,-239.4	0/0:-0.69,-6.62,-106.2	0/0:-0,-4.21,-84	0/0:-0.73,-5.42,-89.2	0/0:-1.2,-10.84,-192.3	0/0:-0,-6.62,-132	0/0:-0,-6.02,-118	0/0:-0,-7.83,-155.2	0/0:-0,-6.62,-132	0/0:-0,-10.84,-196.8	0/0:-0,-8.43,-166.2	0/0:-0,-5.42,-106.5	0/0:-0,-18.06,-358	0/0:-0,-10.24,-202.8	0/0:-0,-10.84,-214	0/0:-0,-5.42,-104.1	0/0:-1.2,-6.62,-109.2	0/0:-0,-4.82,-96	0/0:-0,-9.03,-180	0/0:-0,-9.63,-192	0/0:-0,-7.83,-156	0/0:-0,-5.42,-106.7	0/0:-0,-10.24,-204	0/0:-0,-3.01,-58	0/0:-0,-9.63,-187.3	0/0:-0,-9.63,-184	0/0:-0,-3.61,-72	0/0:-0,-4.82,-96	0/1:-48,-7.83,-106.6	0/0:-0,-6.02,-120	0/0:-0.6,-6.62,-120.6	0/0:-0,-10.24,-204	0/0:-0,-18.06,-358.1	0/0:-0.6,-3.61,-60.6	0/0:-0,-11.44,-228	0/0:-0.6,-7.22,-132.6	0/0:-0.03,-8.43,-161.8	0/0:-0,-6.02,-120	chr1	56574714	56574715	XR_003035375.1	LOC112447298	-	29804
chr1	56604518	56604784	SVTYPE=Bov-A2;END=56604784;SVLEN=266;ADJLEFT=56604518;ADJRIGHT=56604784	0/0:-0,-12.04,-239.4	0/0:-0.69,-6.62,-106.2	0/0:-0,-4.21,-84	0/0:-0.73,-5.42,-89.2	0/0:-1.2,-10.84,-192.3	0/0:-0,-6.62,-132	0/0:-0,-6.02,-118	0/0:-0,-7.83,-155.2	0/0:-0,-6.62,-132	0/0:-0,-10.84,-196.8	0/0:-0,-8.43,-166.2	0/0:-0,-5.42,-106.5	0/0:-0,-18.06,-358	0/0:-0,-10.24,-202.8	0/0:-0,-10.84,-214	0/0:-0,-5.42,-104.1	0/0:-1.2,-6.62,-109.2	0/0:-0,-4.82,-96	0/0:-0,-9.03,-180	0/0:-0,-9.63,-192	0/0:-0,-7.83,-156	0/0:-0,-5.42,-106.7	0/0:-0,-10.24,-204	0/0:-0,-3.01,-58	0/0:-0,-9.63,-187.3	0/0:-0,-9.63,-184	0/0:-0,-3.61,-72	0/0:-0,-4.82,-96	0/1:-48,-7.83,-106.6	0/0:-0,-6.02,-120	0/0:-0.6,-6.62,-120.6	0/0:-0,-10.24,-204	0/0:-0,-18.06,-358.1	0/0:-0.6,-3.61,-60.6	0/0:-0,-11.44,-228	0/0:-0.6,-7.22,-132.6	0/0:-0.03,-8.43,-161.8	0/0:-0,-6.02,-120	chr1	56513438	56513439	XR_003035376.1	LOC112447299	-	91080
chr1	56604518	56604784	SVTYPE=Bov-A2;END=56604784;SVLEN=266;ADJLEFT=56604518;ADJRIGHT=56604784	0/0:-0,-12.04,-239.4	0/0:-0.69,-6.62,-106.2	0/0:-0,-4.21,-84	0/0:-0.73,-5.42,-89.2	0/0:-1.2,-10.84,-192.3	0/0:-0,-6.62,-132	0/0:-0,-6.02,-118	0/0:-0,-7.83,-155.2	0/0:-0,-6.62,-132	0/0:-0,-10.84,-196.8	0/0:-0,-8.43,-166.2	0/0:-0,-5.42,-106.5	0/0:-0,-18.06,-358	0/0:-0,-10.24,-202.8	0/0:-0,-10.84,-214	0/0:-0,-5.42,-104.1	0/0:-1.2,-6.62,-109.2	0/0:-0,-4.82,-96	0/0:-0,-9.03,-180	0/0:-0,-9.63,-192	0/0:-0,-7.83,-156	0/0:-0,-5.42,-106.7	0/0:-0,-10.24,-204	0/0:-0,-3.01,-58	0/0:-0,-9.63,-187.3	0/0:-0,-9.63,-184	0/0:-0,-3.61,-72	0/0:-0,-4.82,-96	0/1:-48,-7.83,-106.6	0/0:-0,-6.02,-120	0/0:-0.6,-6.62,-120.6	0/0:-0,-10.24,-204	0/0:-0,-18.06,-358.1	0/0:-0.6,-3.61,-60.6	0/0:-0,-11.44,-228	0/0:-0.6,-7.22,-132.6	0/0:-0.03,-8.43,-161.8	0/0:-0,-6.02,-120	chr1	56486671	56486672	XM_015471043.2	PHLDB2	+	117847
chr1	56604518	56604784	SVTYPE=Bov-A2;END=56604784;SVLEN=266;ADJLEFT=56604518;ADJRIGHT=56604784	0/0:-0,-12.04,-239.4	0/0:-0.69,-6.62,-106.2	0/0:-0,-4.21,-84	0/0:-0.73,-5.42,-89.2	0/0:-1.2,-10.84,-192.3	0/0:-0,-6.62,-132	0/0:-0,-6.02,-118	0/0:-0,-7.83,-155.2	0/0:-0,-6.62,-132	0/0:-0,-10.84,-196.8	0/0:-0,-8.43,-166.2	0/0:-0,-5.42,-106.5	0/0:-0,-18.06,-358	0/0:-0,-10.24,-202.8	0/0:-0,-10.84,-214	0/0:-0,-5.42,-104.1	0/0:-1.2,-6.62,-109.2	0/0:-0,-4.82,-96	0/0:-0,-9.03,-180	0/0:-0,-9.63,-192	0/0:-0,-7.83,-156	0/0:-0,-5.42,-106.7	0/0:-0,-10.24,-204	0/0:-0,-3.01,-58	0/0:-0,-9.63,-187.3	0/0:-0,-9.63,-184	0/0:-0,-3.61,-72	0/0:-0,-4.82,-96	0/1:-48,-7.83,-106.6	0/0:-0,-6.02,-120	0/0:-0.6,-6.62,-120.6	0/0:-0,-10.24,-204	0/0:-0,-18.06,-358.1	0/0:-0.6,-3.61,-60.6	0/0:-0,-11.44,-228	0/0:-0.6,-7.22,-132.6	0/0:-0.03,-8.43,-161.8	0/0:-0,-6.02,-120	chr1	56737576	56737577	NM_001015606.2	ABHD10	+	132793
chr1	56604518	56604784	SVTYPE=Bov-A2;END=56604784;SVLEN=266;ADJLEFT=56604518;ADJRIGHT=56604784	0/0:-0,-12.04,-239.4	0/0:-0.69,-6.62,-106.2	0/0:-0,-4.21,-84	0/0:-0.73,-5.42,-89.2	0/0:-1.2,-10.84,-192.3	0/0:-0,-6.62,-132	0/0:-0,-6.02,-118	0/0:-0,-7.83,-155.2	0/0:-0,-6.62,-132	0/0:-0,-10.84,-196.8	0/0:-0,-8.43,-166.2	0/0:-0,-5.42,-106.5	0/0:-0,-18.06,-358	0/0:-0,-10.24,-202.8	0/0:-0,-10.84,-214	0/0:-0,-5.42,-104.1	0/0:-1.2,-6.62,-109.2	0/0:-0,-4.82,-96	0/0:-0,-9.03,-180	0/0:-0,-9.63,-192	0/0:-0,-7.83,-156	0/0:-0,-5.42,-106.7	0/0:-0,-10.24,-204	0/0:-0,-3.01,-58	0/0:-0,-9.63,-187.3	0/0:-0,-9.63,-184	0/0:-0,-3.61,-72	0/0:-0,-4.82,-96	0/1:-48,-7.83,-106.6	0/0:-0,-6.02,-120	0/0:-0.6,-6.62,-120.6	0/0:-0,-10.24,-204	0/0:-0,-18.06,-358.1	0/0:-0.6,-3.61,-60.6	0/0:-0,-11.44,-228	0/0:-0.6,-7.22,-132.6	0/0:-0.03,-8.43,-161.8	0/0:-0,-6.02,-120	chr1	56759807	56759808	NM_001034499.2	TAGLN3	+	155024
chr1	56604518	56604784	SVTYPE=Bov-A2;END=56604784;SVLEN=266;ADJLEFT=56604518;ADJRIGHT=56604784	0/0:-0,-12.04,-239.4	0/0:-0.69,-6.62,-106.2	0/0:-0,-4.21,-84	0/0:-0.73,-5.42,-89.2	0/0:-1.2,-10.84,-192.3	0/0:-0,-6.62,-132	0/0:-0,-6.02,-118	0/0:-0,-7.83,-155.2	0/0:-0,-6.62,-132	0/0:-0,-10.84,-196.8	0/0:-0,-8.43,-166.2	0/0:-0,-5.42,-106.5	0/0:-0,-18.06,-358	0/0:-0,-10.24,-202.8	0/0:-0,-10.84,-214	0/0:-0,-5.42,-104.1	0/0:-1.2,-6.62,-109.2	0/0:-0,-4.82,-96	0/0:-0,-9.03,-180	0/0:-0,-9.63,-192	0/0:-0,-7.83,-156	0/0:-0,-5.42,-106.7	0/0:-0,-10.24,-204	0/0:-0,-3.01,-58	0/0:-0,-9.63,-187.3	0/0:-0,-9.63,-184	0/0:-0,-3.61,-72	0/0:-0,-4.82,-96	0/1:-48,-7.83,-106.6	0/0:-0,-6.02,-120	0/0:-0.6,-6.62,-120.6	0/0:-0,-10.24,-204	0/0:-0,-18.06,-358.1	0/0:-0.6,-3.61,-60.6	0/0:-0,-11.44,-228	0/0:-0.6,-7.22,-132.6	0/0:-0.03,-8.43,-161.8	0/0:-0,-6.02,-120	chr1	56779588	56779589	XM_024994281.1	LOC112447300	-	174805
chr1	56604518	56604784	SVTYPE=Bov-A2;END=56604784;SVLEN=266;ADJLEFT=56604518;ADJRIGHT=56604784	0/0:-0,-12.04,-239.4	0/0:-0.69,-6.62,-106.2	0/0:-0,-4.21,-84	0/0:-0.73,-5.42,-89.2	0/0:-1.2,-10.84,-192.3	0/0:-0,-6.62,-132	0/0:-0,-6.02,-118	0/0:-0,-7.83,-155.2	0/0:-0,-6.62,-132	0/0:-0,-10.84,-196.8	0/0:-0,-8.43,-166.2	0/0:-0,-5.42,-106.5	0/0:-0,-18.06,-358	0/0:-0,-10.24,-202.8	0/0:-0,-10.84,-214	0/0:-0,-5.42,-104.1	0/0:-1.2,-6.62,-109.2	0/0:-0,-4.82,-96	0/0:-0,-9.03,-180	0/0:-0,-9.63,-192	0/0:-0,-7.83,-156	0/0:-0,-5.42,-106.7	0/0:-0,-10.24,-204	0/0:-0,-3.01,-58	0/0:-0,-9.63,-187.3	0/0:-0,-9.63,-184	0/0:-0,-3.61,-72	0/0:-0,-4.82,-96	0/1:-48,-7.83,-106.6	0/0:-0,-6.02,-120	0/0:-0.6,-6.62,-120.6	0/0:-0,-10.24,-204	0/0:-0,-18.06,-358.1	0/0:-0.6,-3.61,-60.6	0/0:-0,-11.44,-228	0/0:-0.6,-7.22,-132.6	0/0:-0.03,-8.43,-161.8	0/0:-0,-6.02,-120	chr1	56425438	56425439	XM_005201351.4	PLCXD2	+	179080
chr1	56604518	56604784	SVTYPE=Bov-A2;END=56604784;SVLEN=266;ADJLEFT=56604518;ADJRIGHT=56604784	0/0:-0,-12.04,-239.4	0/0:-0.69,-6.62,-106.2	0/0:-0,-4.21,-84	0/0:-0.73,-5.42,-89.2	0/0:-1.2,-10.84,-192.3	0/0:-0,-6.62,-132	0/0:-0,-6.02,-118	0/0:-0,-7.83,-155.2	0/0:-0,-6.62,-132	0/0:-0,-10.84,-196.8	0/0:-0,-8.43,-166.2	0/0:-0,-5.42,-106.5	0/0:-0,-18.06,-358	0/0:-0,-10.24,-202.8	0/0:-0,-10.84,-214	0/0:-0,-5.42,-104.1	0/0:-1.2,-6.62,-109.2	0/0:-0,-4.82,-96	0/0:-0,-9.03,-180	0/0:-0,-9.63,-192	0/0:-0,-7.83,-156	0/0:-0,-5.42,-106.7	0/0:-0,-10.24,-204	0/0:-0,-3.01,-58	0/0:-0,-9.63,-187.3	0/0:-0,-9.63,-184	0/0:-0,-3.61,-72	0/0:-0,-4.82,-96	0/1:-48,-7.83,-106.6	0/0:-0,-6.02,-120	0/0:-0.6,-6.62,-120.6	0/0:-0,-10.24,-204	0/0:-0,-18.06,-358.1	0/0:-0.6,-3.61,-60.6	0/0:-0,-11.44,-228	0/0:-0.6,-7.22,-132.6	0/0:-0.03,-8.43,-161.8	0/0:-0,-6.02,-120	chr1	56424747	56424748	XR_804182.3	LOC104970843	-	179771
chr1	56604518	56604784	SVTYPE=Bov-A2;END=56604784;SVLEN=266;ADJLEFT=56604518;ADJRIGHT=56604784	0/0:-0,-12.04,-239.4	0/0:-0.69,-6.62,-106.2	0/0:-0,-4.21,-84	0/0:-0.73,-5.42,-89.2	0/0:-1.2,-10.84,-192.3	0/0:-0,-6.62,-132	0/0:-0,-6.02,-118	0/0:-0,-7.83,-155.2	0/0:-0,-6.62,-132	0/0:-0,-10.84,-196.8	0/0:-0,-8.43,-166.2	0/0:-0,-5.42,-106.5	0/0:-0,-18.06,-358	0/0:-0,-10.24,-202.8	0/0:-0,-10.84,-214	0/0:-0,-5.42,-104.1	0/0:-1.2,-6.62,-109.2	0/0:-0,-4.82,-96	0/0:-0,-9.03,-180	0/0:-0,-9.63,-192	0/0:-0,-7.83,-156	0/0:-0,-5.42,-106.7	0/0:-0,-10.24,-204	0/0:-0,-3.01,-58	0/0:-0,-9.63,-187.3	0/0:-0,-9.63,-184	0/0:-0,-3.61,-72	0/0:-0,-4.82,-96	0/1:-48,-7.83,-106.6	0/0:-0,-6.02,-120	0/0:-0.6,-6.62,-120.6	0/0:-0,-10.24,-204	0/0:-0,-18.06,-358.1	0/0:-0.6,-3.61,-60.6	0/0:-0,-11.44,-228	0/0:-0.6,-7.22,-132.6	0/0:-0.03,-8.43,-161.8	0/0:-0,-6.02,-120	chr1	56831560	56831561	NM_001205892.1	TMPRSS7	+	226777
chr1	117616240	117616500	SVTYPE=Bov-A2;END=117616500;SVLEN=260;ADJLEFT=117616240;ADJRIGHT=117616500	0/1:-72,-6.02,-48	0/0:-0.6,-4.82,-77.5	0/0:-0,-11.44,-226.4	0/0:-1.2,-4.82,-71.5	0/0:-0,-6.02,-120	0/0:-0,-15.05,-297.9	0/0:-0,-8.43,-164.8	0/0:-0,-13.25,-264	0/0:-0,-10.24,-204	0/0:-0,-9.63,-180.9	0/0:-0,-6.02,-119.1	0/1:-24,-5.42,-80	0/0:-1.2,-1.2,-1.2	0/0:-0,-13.25,-262	0/0:-1.2,-4.21,-53.2	0/0:-0,-6.62,-125.3	0/0:-0,-7.83,-156	0/0:-0,-9.03,-179.2	0/1:-48,-7.22,-94.9	0/1:-36,-10.84,-179.7	0/0:-0,-12.04,-236.9	0/0:-0,-3.61,-66.3	0/1:-24,-4.82,-70	0/0:-0,-6.02,-116.9	0/0:-0,-7.83,-148	0/1:-72,-10.84,-136.4	0/0:-0,-8.43,-168	0/0:-1.81,-7.83,-120.01	0/0:-0,-10.84,-216	0/0:-0,-7.22,-140.9	0/0:-0,-6.02,-112.5	0/1:-48,-6.02,-70.2	0/0:-0,-9.63,-188.1	0/0:-2.41,-7.22,-98.01	0/0:-0,-9.03,-179.3	0/0:-0.6,-3.61,-60.6	0/1:-24,-4.82,-72	0/0:-0,-6.62,-126.8	chr1	117598268	117598269	NM_001114083.2	SERP1	+	17972
chr1	117616240	117616500	SVTYPE=Bov-A2;END=117616500;SVLEN=260;ADJLEFT=117616240;ADJRIGHT=117616500	0/1:-72,-6.02,-48	0/0:-0.6,-4.82,-77.5	0/0:-0,-11.44,-226.4	0/0:-1.2,-4.82,-71.5	0/0:-0,-6.02,-120	0/0:-0,-15.05,-297.9	0/0:-0,-8.43,-164.8	0/0:-0,-13.25,-264	0/0:-0,-10.24,-204	0/0:-0,-9.63,-180.9	0/0:-0,-6.02,-119.1	0/1:-24,-5.42,-80	0/0:-1.2,-1.2,-1.2	0/0:-0,-13.25,-262	0/0:-1.2,-4.21,-53.2	0/0:-0,-6.62,-125.3	0/0:-0,-7.83,-156	0/0:-0,-9.03,-179.2	0/1:-48,-7.22,-94.9	0/1:-36,-10.84,-179.7	0/0:-0,-12.04,-236.9	0/0:-0,-3.61,-66.3	0/1:-24,-4.82,-70	0/0:-0,-6.02,-116.9	0/0:-0,-7.83,-148	0/1:-72,-10.84,-136.4	0/0:-0,-8.43,-168	0/0:-1.81,-7.83,-120.01	0/0:-0,-10.84,-216	0/0:-0,-7.22,-140.9	0/0:-0,-6.02,-112.5	0/1:-48,-6.02,-70.2	0/0:-0,-9.63,-188.1	0/0:-2.41,-7.22,-98.01	0/0:-0,-9.03,-179.3	0/0:-0.6,-3.61,-60.6	0/1:-24,-4.82,-72	0/0:-0,-6.62,-126.8	chr1	117597948	117597949	NM_001102283.1	EIF2A	-	18292
chr1	117616240	117616500	SVTYPE=Bov-A2;END=117616500;SVLEN=260;ADJLEFT=117616240;ADJRIGHT=117616500	0/1:-72,-6.02,-48	0/0:-0.6,-4.82,-77.5	0/0:-0,-11.44,-226.4	0/0:-1.2,-4.82,-71.5	0/0:-0,-6.02,-120	0/0:-0,-15.05,-297.9	0/0:-0,-8.43,-164.8	0/0:-0,-13.25,-264	0/0:-0,-10.24,-204	0/0:-0,-9.63,-180.9	0/0:-0,-6.02,-119.1	0/1:-24,-5.42,-80	0/0:-1.2,-1.2,-1.2	0/0:-0,-13.25,-262	0/0:-1.2,-4.21,-53.2	0/0:-0,-6.62,-125.3	0/0:-0,-7.83,-156	0/0:-0,-9.03,-179.2	0/1:-48,-7.22,-94.9	0/1:-36,-10.84,-179.7	0/0:-0,-12.04,-236.9	0/0:-0,-3.61,-66.3	0/1:-24,-4.82,-70	0/0:-0,-6.02,-116.9	0/0:-0,-7.83,-148	0/1:-72,-10.84,-136.4	0/0:-0,-8.43,-168	0/0:-1.81,-7.83,-120.01	0/0:-0,-10.84,-216	0/0:-0,-7.22,-140.9	0/0:-0,-6.02,-112.5	0/1:-48,-6.02,-70.2	0/0:-0,-9.63,-188.1	0/0:-2.41,-7.22,-98.01	0/0:-0,-9.03,-179.3	0/0:-0.6,-3.61,-60.6	0/1:-24,-4.82,-72	0/0:-0,-6.62,-126.8	chr1	117589334	117589335	XR_003036685.1	LOC112448318	-	26906
chr1	117616240	117616500	SVTYPE=Bov-A2;END=117616500;SVLEN=260;ADJLEFT=117616240;ADJRIGHT=117616500	0/1:-72,-6.02,-48	0/0:-0.6,-4.82,-77.5	0/0:-0,-11.44,-226.4	0/0:-1.2,-4.82,-71.5	0/0:-0,-6.02,-120	0/0:-0,-15.05,-297.9	0/0:-0,-8.43,-164.8	0/0:-0,-13.25,-264	0/0:-0,-10.24,-204	0/0:-0,-9.63,-180.9	0/0:-0,-6.02,-119.1	0/1:-24,-5.42,-80	0/0:-1.2,-1.2,-1.2	0/0:-0,-13.25,-262	0/0:-1.2,-4.21,-53.2	0/0:-0,-6.62,-125.3	0/0:-0,-7.83,-156	0/0:-0,-9.03,-179.2	0/1:-48,-7.22,-94.9	0/1:-36,-10.84,-179.7	0/0:-0,-12.04,-236.9	0/0:-0,-3.61,-66.3	0/1:-24,-4.82,-70	0/0:-0,-6.02,-116.9	0/0:-0,-7.83,-148	0/1:-72,-10.84,-136.4	0/0:-0,-8.43,-168	0/0:-1.81,-7.83,-120.01	0/0:-0,-10.84,-216	0/0:-0,-7.22,-140.9	0/0:-0,-6.02,-112.5	0/1:-48,-6.02,-70.2	0/0:-0,-9.63,-188.1	0/0:-2.41,-7.22,-98.01	0/0:-0,-9.03,-179.3	0/0:-0.6,-3.61,-60.6	0/1:-24,-4.82,-72	0/0:-0,-6.62,-126.8	chr1	117646289	117646290	XR_003035917.1	LOC112447743	-	29790
chr1	117616240	117616500	SVTYPE=Bov-A2;END=117616500;SVLEN=260;ADJLEFT=117616240;ADJRIGHT=117616500	0/1:-72,-6.02,-48	0/0:-0.6,-4.82,-77.5	0/0:-0,-11.44,-226.4	0/0:-1.2,-4.82,-71.5	0/0:-0,-6.02,-120	0/0:-0,-15.05,-297.9	0/0:-0,-8.43,-164.8	0/0:-0,-13.25,-264	0/0:-0,-10.24,-204	0/0:-0,-9.63,-180.9	0/0:-0,-6.02,-119.1	0/1:-24,-5.42,-80	0/0:-1.2,-1.2,-1.2	0/0:-0,-13.25,-262	0/0:-1.2,-4.21,-53.2	0/0:-0,-6.62,-125.3	0/0:-0,-7.83,-156	0/0:-0,-9.03,-179.2	0/1:-48,-7.22,-94.9	0/1:-36,-10.84,-179.7	0/0:-0,-12.04,-236.9	0/0:-0,-3.61,-66.3	0/1:-24,-4.82,-70	0/0:-0,-6.02,-116.9	0/0:-0,-7.83,-148	0/1:-72,-10.84,-136.4	0/0:-0,-8.43,-168	0/0:-1.81,-7.83,-120.01	0/0:-0,-10.84,-216	0/0:-0,-7.22,-140.9	0/0:-0,-6.02,-112.5	0/1:-48,-6.02,-70.2	0/0:-0,-9.63,-188.1	0/0:-2.41,-7.22,-98.01	0/0:-0,-9.03,-179.3	0/0:-0.6,-3.61,-60.6	0/1:-24,-4.82,-72	0/0:-0,-6.62,-126.8	chr1	117537601	117537602	NM_001103103.2	SELENOT	-	78639
chr1	117616240	117616500	SVTYPE=Bov-A2;END=117616500;SVLEN=260;ADJLEFT=117616240;ADJRIGHT=117616500	0/1:-72,-6.02,-48	0/0:-0.6,-4.82,-77.5	0/0:-0,-11.44,-226.4	0/0:-1.2,-4.82,-71.5	0/0:-0,-6.02,-120	0/0:-0,-15.05,-297.9	0/0:-0,-8.43,-164.8	0/0:-0,-13.25,-264	0/0:-0,-10.24,-204	0/0:-0,-9.63,-180.9	0/0:-0,-6.02,-119.1	0/1:-24,-5.42,-80	0/0:-1.2,-1.2,-1.2	0/0:-0,-13.25,-262	0/0:-1.2,-4.21,-53.2	0/0:-0,-6.62,-125.3	0/0:-0,-7.83,-156	0/0:-0,-9.03,-179.2	0/1:-48,-7.22,-94.9	0/1:-36,-10.84,-179.7	0/0:-0,-12.04,-236.9	0/0:-0,-3.61,-66.3	0/1:-24,-4.82,-70	0/0:-0,-6.02,-116.9	0/0:-0,-7.83,-148	0/1:-72,-10.84,-136.4	0/0:-0,-8.43,-168	0/0:-1.81,-7.83,-120.01	0/0:-0,-10.84,-216	0/0:-0,-7.22,-140.9	0/0:-0,-6.02,-112.5	0/1:-48,-6.02,-70.2	0/0:-0,-9.63,-188.1	0/0:-2.41,-7.22,-98.01	0/0:-0,-9.03,-179.3	0/0:-0.6,-3.61,-60.6	0/1:-24,-4.82,-72	0/0:-0,-6.62,-126.8	chr1	117718617	117718618	XR_804448.3	TSC22D2	-	102118
chr1	117616240	117616500	SVTYPE=Bov-A2;END=117616500;SVLEN=260;ADJLEFT=117616240;ADJRIGHT=117616500	0/1:-72,-6.02,-48	0/0:-0.6,-4.82,-77.5	0/0:-0,-11.44,-226.4	0/0:-1.2,-4.82,-71.5	0/0:-0,-6.02,-120	0/0:-0,-15.05,-297.9	0/0:-0,-8.43,-164.8	0/0:-0,-13.25,-264	0/0:-0,-10.24,-204	0/0:-0,-9.63,-180.9	0/0:-0,-6.02,-119.1	0/1:-24,-5.42,-80	0/0:-1.2,-1.2,-1.2	0/0:-0,-13.25,-262	0/0:-1.2,-4.21,-53.2	0/0:-0,-6.62,-125.3	0/0:-0,-7.83,-156	0/0:-0,-9.03,-179.2	0/1:-48,-7.22,-94.9	0/1:-36,-10.84,-179.7	0/0:-0,-12.04,-236.9	0/0:-0,-3.61,-66.3	0/1:-24,-4.82,-70	0/0:-0,-6.02,-116.9	0/0:-0,-7.83,-148	0/1:-72,-10.84,-136.4	0/0:-0,-8.43,-168	0/0:-1.81,-7.83,-120.01	0/0:-0,-10.84,-216	0/0:-0,-7.22,-140.9	0/0:-0,-6.02,-112.5	0/1:-48,-6.02,-70.2	0/0:-0,-9.63,-188.1	0/0:-2.41,-7.22,-98.01	0/0:-0,-9.03,-179.3	0/0:-0.6,-3.61,-60.6	0/1:-24,-4.82,-72	0/0:-0,-6.62,-126.8	chr1	117745860	117745861	XR_804468.2	LOC104971004	+	129361
chr1	117616240	117616500	SVTYPE=Bov-A2;END=117616500;SVLEN=260;ADJLEFT=117616240;ADJRIGHT=117616500	0/1:-72,-6.02,-48	0/0:-0.6,-4.82,-77.5	0/0:-0,-11.44,-226.4	0/0:-1.2,-4.82,-71.5	0/0:-0,-6.02,-120	0/0:-0,-15.05,-297.9	0/0:-0,-8.43,-164.8	0/0:-0,-13.25,-264	0/0:-0,-10.24,-204	0/0:-0,-9.63,-180.9	0/0:-0,-6.02,-119.1	0/1:-24,-5.42,-80	0/0:-1.2,-1.2,-1.2	0/0:-0,-13.25,-262	0/0:-1.2,-4.21,-53.2	0/0:-0,-6.62,-125.3	0/0:-0,-7.83,-156	0/0:-0,-9.03,-179.2	0/1:-48,-7.22,-94.9	0/1:-36,-10.84,-179.7	0/0:-0,-12.04,-236.9	0/0:-0,-3.61,-66.3	0/1:-24,-4.82,-70	0/0:-0,-6.02,-116.9	0/0:-0,-7.83,-148	0/1:-72,-10.84,-136.4	0/0:-0,-8.43,-168	0/0:-1.81,-7.83,-120.01	0/0:-0,-10.84,-216	0/0:-0,-7.22,-140.9	0/0:-0,-6.02,-112.5	0/1:-48,-6.02,-70.2	0/0:-0,-9.63,-188.1	0/0:-2.41,-7.22,-98.01	0/0:-0,-9.03,-179.3	0/0:-0.6,-3.61,-60.6	0/1:-24,-4.82,-72	0/0:-0,-6.62,-126.8	chr1	117433095	117433096	XM_024995916.1	ERICH6	+	183145
chr11	63597589	63597872	SVTYPE=Bov-A2;END=63597872;SVLEN=283;ADJLEFT=63597589;ADJRIGHT=63597872	0/0:-0,-14.45,-286.7	0/0:-0,-15.05,-284.9	0/0:-0,-9.03,-178	0/0:-0,-14.45,-284.2	0/0:-0,-10.24,-200.4	0/0:-0,-7.22,-142	0/0:-0,-9.03,-180	0/0:-0,-9.63,-187.9	0/0:-0,-13.25,-262.1	0/0:-0,-7.83,-147.3	0/0:-0,-14.45,-285.1	0/0:-0,-3.01,-54.9	0/0:-0,-12.04,-231.7	0/0:-0,-11.44,-223.7	0/0:-0,-12.64,-230.5	0/0:-0,-5.42,-97	0/1:-24,-4.21,-58	0/0:-0,-9.63,-191.9	0/0:-0,-13.25,-259.4	0/0:-1.2,-4.82,-73.2	0/0:-0,-11.44,-223.4	0/0:-0,-7.83,-136.8	0/1:-36,-7.83,-120	0/0:-0,-4.21,-80.9	0/0:-0,-3.01,-53.1	0/0:-0,-18.06,-335.6	0/0:-0,-8.43,-168	0/0:-0,-7.83,-152.2	0/0:-0,-10.84,-213.6	0/0:-0,-4.82,-96	0/0:-3.01,-7.22,-85.01	0/0:-0,-10.24,-203.4	0/0:-0,-9.63,-191.1	0/0:-0,-12.04,-235.7	0/0:-0,-7.83,-154	0/0:-0,-2.41,-48	0/1:-24,-3.01,-34.6	0/0:-0,-5.42,-108	chr11	63594845	63594846	NM_001102213.1	ACTR2	+	2744
chr11	63597589	63597872	SVTYPE=Bov-A2;END=63597872;SVLEN=283;ADJLEFT=63597589;ADJRIGHT=63597872	0/0:-0,-14.45,-286.7	0/0:-0,-15.05,-284.9	0/0:-0,-9.03,-178	0/0:-0,-14.45,-284.2	0/0:-0,-10.24,-200.4	0/0:-0,-7.22,-142	0/0:-0,-9.03,-180	0/0:-0,-9.63,-187.9	0/0:-0,-13.25,-262.1	0/0:-0,-7.83,-147.3	0/0:-0,-14.45,-285.1	0/0:-0,-3.01,-54.9	0/0:-0,-12.04,-231.7	0/0:-0,-11.44,-223.7	0/0:-0,-12.64,-230.5	0/0:-0,-5.42,-97	0/1:-24,-4.21,-58	0/0:-0,-9.63,-191.9	0/0:-0,-13.25,-259.4	0/0:-1.2,-4.82,-73.2	0/0:-0,-11.44,-223.4	0/0:-0,-7.83,-136.8	0/1:-36,-7.83,-120	0/0:-0,-4.21,-80.9	0/0:-0,-3.01,-53.1	0/0:-0,-18.06,-335.6	0/0:-0,-8.43,-168	0/0:-0,-7.83,-152.2	0/0:-0,-10.84,-213.6	0/0:-0,-4.82,-96	0/0:-3.01,-7.22,-85.01	0/0:-0,-10.24,-203.4	0/0:-0,-9.63,-191.1	0/0:-0,-12.04,-235.7	0/0:-0,-7.83,-154	0/0:-0,-2.41,-48	0/1:-24,-3.01,-34.6	0/0:-0,-5.42,-108	chr11	63567406	63567407	XR_003037209.1	LOC112448804	+	30183
chr11	63597589	63597872	SVTYPE=Bov-A2;END=63597872;SVLEN=283;ADJLEFT=63597589;ADJRIGHT=63597872	0/0:-0,-14.45,-286.7	0/0:-0,-15.05,-284.9	0/0:-0,-9.03,-178	0/0:-0,-14.45,-284.2	0/0:-0,-10.24,-200.4	0/0:-0,-7.22,-142	0/0:-0,-9.03,-180	0/0:-0,-9.63,-187.9	0/0:-0,-13.25,-262.1	0/0:-0,-7.83,-147.3	0/0:-0,-14.45,-285.1	0/0:-0,-3.01,-54.9	0/0:-0,-12.04,-231.7	0/0:-0,-11.44,-223.7	0/0:-0,-12.64,-230.5	0/0:-0,-5.42,-97	0/1:-24,-4.21,-58	0/0:-0,-9.63,-191.9	0/0:-0,-13.25,-259.4	0/0:-1.2,-4.82,-73.2	0/0:-0,-11.44,-223.4	0/0:-0,-7.83,-136.8	0/1:-36,-7.83,-120	0/0:-0,-4.21,-80.9	0/0:-0,-3.01,-53.1	0/0:-0,-18.06,-335.6	0/0:-0,-8.43,-168	0/0:-0,-7.83,-152.2	0/0:-0,-10.84,-213.6	0/0:-0,-4.82,-96	0/0:-3.01,-7.22,-85.01	0/0:-0,-10.24,-203.4	0/0:-0,-9.63,-191.1	0/0:-0,-12.04,-235.7	0/0:-0,-7.83,-154	0/0:-0,-2.41,-48	0/1:-24,-3.01,-34.6	0/0:-0,-5.42,-108	chr11	63500862	63500863	XM_005212869.4	RAB1A	-	96727
chr11	63597589	63597872	SVTYPE=Bov-A2;END=63597872;SVLEN=283;ADJLEFT=63597589;ADJRIGHT=63597872	0/0:-0,-14.45,-286.7	0/0:-0,-15.05,-284.9	0/0:-0,-9.03,-178	0/0:-0,-14.45,-284.2	0/0:-0,-10.24,-200.4	0/0:-0,-7.22,-142	0/0:-0,-9.03,-180	0/0:-0,-9.63,-187.9	0/0:-0,-13.25,-262.1	0/0:-0,-7.83,-147.3	0/0:-0,-14.45,-285.1	0/0:-0,-3.01,-54.9	0/0:-0,-12.04,-231.7	0/0:-0,-11.44,-223.7	0/0:-0,-12.64,-230.5	0/0:-0,-5.42,-97	0/1:-24,-4.21,-58	0/0:-0,-9.63,-191.9	0/0:-0,-13.25,-259.4	0/0:-1.2,-4.82,-73.2	0/0:-0,-11.44,-223.4	0/0:-0,-7.83,-136.8	0/1:-36,-7.83,-120	0/0:-0,-4.21,-80.9	0/0:-0,-3.01,-53.1	0/0:-0,-18.06,-335.6	0/0:-0,-8.43,-168	0/0:-0,-7.83,-152.2	0/0:-0,-10.84,-213.6	0/0:-0,-4.82,-96	0/0:-3.01,-7.22,-85.01	0/0:-0,-10.24,-203.4	0/0:-0,-9.63,-191.1	0/0:-0,-12.04,-235.7	0/0:-0,-7.83,-154	0/0:-0,-2.41,-48	0/1:-24,-3.01,-34.6	0/0:-0,-5.42,-108	chr11	63443958	63443959	XM_005212896.4	CEP68	+	153631
chr11	63597589	63597872	SVTYPE=Bov-A2;END=63597872;SVLEN=283;ADJLEFT=63597589;ADJRIGHT=63597872	0/0:-0,-14.45,-286.7	0/0:-0,-15.05,-284.9	0/0:-0,-9.03,-178	0/0:-0,-14.45,-284.2	0/0:-0,-10.24,-200.4	0/0:-0,-7.22,-142	0/0:-0,-9.03,-180	0/0:-0,-9.63,-187.9	0/0:-0,-13.25,-262.1	0/0:-0,-7.83,-147.3	0/0:-0,-14.45,-285.1	0/0:-0,-3.01,-54.9	0/0:-0,-12.04,-231.7	0/0:-0,-11.44,-223.7	0/0:-0,-12.64,-230.5	0/0:-0,-5.42,-97	0/1:-24,-4.21,-58	0/0:-0,-9.63,-191.9	0/0:-0,-13.25,-259.4	0/0:-1.2,-4.82,-73.2	0/0:-0,-11.44,-223.4	0/0:-0,-7.83,-136.8	0/1:-36,-7.83,-120	0/0:-0,-4.21,-80.9	0/0:-0,-3.01,-53.1	0/0:-0,-18.06,-335.6	0/0:-0,-8.43,-168	0/0:-0,-7.83,-152.2	0/0:-0,-10.84,-213.6	0/0:-0,-4.82,-96	0/0:-3.01,-7.22,-85.01	0/0:-0,-10.24,-203.4	0/0:-0,-9.63,-191.1	0/0:-0,-12.04,-235.7	0/0:-0,-7.83,-154	0/0:-0,-2.41,-48	0/1:-24,-3.01,-34.6	0/0:-0,-5.42,-108	chr11	63804480	63804481	XM_005212899.4	SPRED2	-	206609
chr11	63597589	63597872	SVTYPE=Bov-A2;END=63597872;SVLEN=283;ADJLEFT=63597589;ADJRIGHT=63597872	0/0:-0,-14.45,-286.7	0/0:-0,-15.05,-284.9	0/0:-0,-9.03,-178	0/0:-0,-14.45,-284.2	0/0:-0,-10.24,-200.4	0/0:-0,-7.22,-142	0/0:-0,-9.03,-180	0/0:-0,-9.63,-187.9	0/0:-0,-13.25,-262.1	0/0:-0,-7.83,-147.3	0/0:-0,-14.45,-285.1	0/0:-0,-3.01,-54.9	0/0:-0,-12.04,-231.7	0/0:-0,-11.44,-223.7	0/0:-0,-12.64,-230.5	0/0:-0,-5.42,-97	0/1:-24,-4.21,-58	0/0:-0,-9.63,-191.9	0/0:-0,-13.25,-259.4	0/0:-1.2,-4.82,-73.2	0/0:-0,-11.44,-223.4	0/0:-0,-7.83,-136.8	0/1:-36,-7.83,-120	0/0:-0,-4.21,-80.9	0/0:-0,-3.01,-53.1	0/0:-0,-18.06,-335.6	0/0:-0,-8.43,-168	0/0:-0,-7.83,-152.2	0/0:-0,-10.84,-213.6	0/0:-0,-4.82,-96	0/0:-3.01,-7.22,-85.01	0/0:-0,-10.24,-203.4	0/0:-0,-9.63,-191.1	0/0:-0,-12.04,-235.7	0/0:-0,-7.83,-154	0/0:-0,-2.41,-48	0/1:-24,-3.01,-34.6	0/0:-0,-5.42,-108	chr11	63379682	63379683	NM_001081577.1	SLC1A4	+	217907
chr12	73105301	73105549	SVTYPE=Bov-A2;END=73105549;SVLEN=248;ADJLEFT=73105301;ADJRIGHT=73105549	0/0:-0,-9.63,-181.4	0/0:-0,-9.63,-170.5	0/0:-0,-11.44,-218.5	0/0:-0.03,-12.64,-242.5	0/0:-0,-8.43,-159.5	0/0:-0.6,-10.24,-190.2	0/0:-2.41,-10.84,-170.41	0/0:-0,-6.62,-124.1	0/0:-0,-19.27,-376.8	0/0:-0,-5.42,-95	0/0:-0.6,-10.24,-181.3	0/0:-1.2,-1.2,-1.2	0/0:-0.13,-14.45,-272.9	0/0:-0,-12.64,-244.5	0/0:-0,-5.42,-104	0/0:-0,-4.21,-74.4	0/0:-0,-4.82,-90	0/0:-0,-11.44,-216.7	0/0:-1.2,-13.25,-237.3	0/0:-0,-7.22,-139	0/0:-0,-9.03,-167	0/0:-0,-6.02,-107	0/0:-0.6,-6.02,-102.7	0/1:-36,-4.21,-48	0/0:-0,-7.83,-146	0/0:-0,-10.84,-207.1	0/1:-36,-6.62,-94.4	0/0:-0,-11.44,-221.8	0/0:-0,-9.03,-173	0/0:-0,-9.03,-173.5	0/0:-0,-12.04,-223.4	0/0:-0,-13.25,-251.7	0/0:-0,-10.84,-205.7	0/0:-0,-8.43,-157.6	0/0:-0,-21.07,-408	0/0:-0.6,-12.04,-223.1	0/0:-0,-3.61,-70	0/0:-0,-9.63,-188	chr12	73095399	73095400	NM_174756.3	DNAJC3	+	9902
chr12	73105301	73105549	SVTYPE=Bov-A2;END=73105549;SVLEN=248;ADJLEFT=73105301;ADJRIGHT=73105549	0/0:-0,-9.63,-181.4	0/0:-0,-9.63,-170.5	0/0:-0,-11.44,-218.5	0/0:-0.03,-12.64,-242.5	0/0:-0,-8.43,-159.5	0/0:-0.6,-10.24,-190.2	0/0:-2.41,-10.84,-170.41	0/0:-0,-6.62,-124.1	0/0:-0,-19.27,-376.8	0/0:-0,-5.42,-95	0/0:-0.6,-10.24,-181.3	0/0:-1.2,-1.2,-1.2	0/0:-0.13,-14.45,-272.9	0/0:-0,-12.64,-244.5	0/0:-0,-5.42,-104	0/0:-0,-4.21,-74.4	0/0:-0,-4.82,-90	0/0:-0,-11.44,-216.7	0/0:-1.2,-13.25,-237.3	0/0:-0,-7.22,-139	0/0:-0,-9.03,-167	0/0:-0,-6.02,-107	0/0:-0.6,-6.02,-102.7	0/1:-36,-4.21,-48	0/0:-0,-7.83,-146	0/0:-0,-10.84,-207.1	0/1:-36,-6.62,-94.4	0/0:-0,-11.44,-221.8	0/0:-0,-9.03,-173	0/0:-0,-9.03,-173.5	0/0:-0,-12.04,-223.4	0/0:-0,-13.25,-251.7	0/0:-0,-10.84,-205.7	0/0:-0,-8.43,-157.6	0/0:-0,-21.07,-408	0/0:-0.6,-12.04,-223.1	0/0:-0,-3.61,-70	0/0:-0,-9.63,-188	chr12	73062120	73062121	XM_010810951.3	DZIP1	-	43181
chr12	73105301	73105549	SVTYPE=Bov-A2;END=73105549;SVLEN=248;ADJLEFT=73105301;ADJRIGHT=73105549	0/0:-0,-9.63,-181.4	0/0:-0,-9.63,-170.5	0/0:-0,-11.44,-218.5	0/0:-0.03,-12.64,-242.5	0/0:-0,-8.43,-159.5	0/0:-0.6,-10.24,-190.2	0/0:-2.41,-10.84,-170.41	0/0:-0,-6.62,-124.1	0/0:-0,-19.27,-376.8	0/0:-0,-5.42,-95	0/0:-0.6,-10.24,-181.3	0/0:-1.2,-1.2,-1.2	0/0:-0.13,-14.45,-272.9	0/0:-0,-12.64,-244.5	0/0:-0,-5.42,-104	0/0:-0,-4.21,-74.4	0/0:-0,-4.82,-90	0/0:-0,-11.44,-216.7	0/0:-1.2,-13.25,-237.3	0/0:-0,-7.22,-139	0/0:-0,-9.03,-167	0/0:-0,-6.02,-107	0/0:-0.6,-6.02,-102.7	0/1:-36,-4.21,-48	0/0:-0,-7.83,-146	0/0:-0,-10.84,-207.1	0/1:-36,-6.62,-94.4	0/0:-0,-11.44,-221.8	0/0:-0,-9.03,-173	0/0:-0,-9.03,-173.5	0/0:-0,-12.04,-223.4	0/0:-0,-13.25,-251.7	0/0:-0,-10.84,-205.7	0/0:-0,-8.43,-157.6	0/0:-0,-21.07,-408	0/0:-0.6,-12.04,-223.1	0/0:-0,-3.61,-70	0/0:-0,-9.63,-188	chr12	72938035	72938036	XR_003037564.1	LOC104973643	-	167266
chr12	73105301	73105549	SVTYPE=Bov-A2;END=73105549;SVLEN=248;ADJLEFT=73105301;ADJRIGHT=73105549	0/0:-0,-9.63,-181.4	0/0:-0,-9.63,-170.5	0/0:-0,-11.44,-218.5	0/0:-0.03,-12.64,-242.5	0/0:-0,-8.43,-159.5	0/0:-0.6,-10.24,-190.2	0/0:-2.41,-10.84,-170.41	0/0:-0,-6.62,-124.1	0/0:-0,-19.27,-376.8	0/0:-0,-5.42,-95	0/0:-0.6,-10.24,-181.3	0/0:-1.2,-1.2,-1.2	0/0:-0.13,-14.45,-272.9	0/0:-0,-12.64,-244.5	0/0:-0,-5.42,-104	0/0:-0,-4.21,-74.4	0/0:-0,-4.82,-90	0/0:-0,-11.44,-216.7	0/0:-1.2,-13.25,-237.3	0/0:-0,-7.22,-139	0/0:-0,-9.03,-167	0/0:-0,-6.02,-107	0/0:-0.6,-6.02,-102.7	0/1:-36,-4.21,-48	0/0:-0,-7.83,-146	0/0:-0,-10.84,-207.1	0/1:-36,-6.62,-94.4	0/0:-0,-11.44,-221.8	0/0:-0,-9.03,-173	0/0:-0,-9.03,-173.5	0/0:-0,-12.04,-223.4	0/0:-0,-13.25,-251.7	0/0:-0,-10.84,-205.7	0/0:-0,-8.43,-157.6	0/0:-0,-21.07,-408	0/0:-0.6,-12.04,-223.1	0/0:-0,-3.61,-70	0/0:-0,-9.63,-188	chr12	72933633	72933634	XR_003037565.1	LOC112449076	-	171668
chr12	73105301	73105549	SVTYPE=Bov-A2;END=73105549;SVLEN=248;ADJLEFT=73105301;ADJRIGHT=73105549	0/0:-0,-9.63,-181.4	0/0:-0,-9.63,-170.5	0/0:-0,-11.44,-218.5	0/0:-0.03,-12.64,-242.5	0/0:-0,-8.43,-159.5	0/0:-0.6,-10.24,-190.2	0/0:-2.41,-10.84,-170.41	0/0:-0,-6.62,-124.1	0/0:-0,-19.27,-376.8	0/0:-0,-5.42,-95	0/0:-0.6,-10.24,-181.3	0/0:-1.2,-1.2,-1.2	0/0:-0.13,-14.45,-272.9	0/0:-0,-12.64,-244.5	0/0:-0,-5.42,-104	0/0:-0,-4.21,-74.4	0/0:-0,-4.82,-90	0/0:-0,-11.44,-216.7	0/0:-1.2,-13.25,-237.3	0/0:-0,-7.22,-139	0/0:-0,-9.03,-167	0/0:-0,-6.02,-107	0/0:-0.6,-6.02,-102.7	0/1:-36,-4.21,-48	0/0:-0,-7.83,-146	0/0:-0,-10.84,-207.1	0/1:-36,-6.62,-94.4	0/0:-0,-11.44,-221.8	0/0:-0,-9.03,-173	0/0:-0,-9.03,-173.5	0/0:-0,-12.04,-223.4	0/0:-0,-13.25,-251.7	0/0:-0,-10.84,-205.7	0/0:-0,-8.43,-157.6	0/0:-0,-21.07,-408	0/0:-0.6,-12.04,-223.1	0/0:-0,-3.61,-70	0/0:-0,-9.63,-188	chr12	72904648	72904649	NM_001105609.2	CLDN10	+	200653
chr12	73105301	73105549	SVTYPE=Bov-A2;END=73105549;SVLEN=248;ADJLEFT=73105301;ADJRIGHT=73105549	0/0:-0,-9.63,-181.4	0/0:-0,-9.63,-170.5	0/0:-0,-11.44,-218.5	0/0:-0.03,-12.64,-242.5	0/0:-0,-8.43,-159.5	0/0:-0.6,-10.24,-190.2	0/0:-2.41,-10.84,-170.41	0/0:-0,-6.62,-124.1	0/0:-0,-19.27,-376.8	0/0:-0,-5.42,-95	0/0:-0.6,-10.24,-181.3	0/0:-1.2,-1.2,-1.2	0/0:-0.13,-14.45,-272.9	0/0:-0,-12.64,-244.5	0/0:-0,-5.42,-104	0/0:-0,-4.21,-74.4	0/0:-0,-4.82,-90	0/0:-0,-11.44,-216.7	0/0:-1.2,-13.25,-237.3	0/0:-0,-7.22,-139	0/0:-0,-9.03,-167	0/0:-0,-6.02,-107	0/0:-0.6,-6.02,-102.7	0/1:-36,-4.21,-48	0/0:-0,-7.83,-146	0/0:-0,-10.84,-207.1	0/1:-36,-6.62,-94.4	0/0:-0,-11.44,-221.8	0/0:-0,-9.03,-173	0/0:-0,-9.03,-173.5	0/0:-0,-12.04,-223.4	0/0:-0,-13.25,-251.7	0/0:-0,-10.84,-205.7	0/0:-0,-8.43,-157.6	0/0:-0,-21.07,-408	0/0:-0.6,-12.04,-223.1	0/0:-0,-3.61,-70	0/0:-0,-9.63,-188	chr12	73313744	73313745	XM_002691971.5	UGGT2	-	208196
chr12	73105301	73105549	SVTYPE=Bov-A2;END=73105549;SVLEN=248;ADJLEFT=73105301;ADJRIGHT=73105549	0/0:-0,-9.63,-181.4	0/0:-0,-9.63,-170.5	0/0:-0,-11.44,-218.5	0/0:-0.03,-12.64,-242.5	0/0:-0,-8.43,-159.5	0/0:-0.6,-10.24,-190.2	0/0:-2.41,-10.84,-170.41	0/0:-0,-6.62,-124.1	0/0:-0,-19.27,-376.8	0/0:-0,-5.42,-95	0/0:-0.6,-10.24,-181.3	0/0:-1.2,-1.2,-1.2	0/0:-0.13,-14.45,-272.9	0/0:-0,-12.64,-244.5	0/0:-0,-5.42,-104	0/0:-0,-4.21,-74.4	0/0:-0,-4.82,-90	0/0:-0,-11.44,-216.7	0/0:-1.2,-13.25,-237.3	0/0:-0,-7.22,-139	0/0:-0,-9.03,-167	0/0:-0,-6.02,-107	0/0:-0.6,-6.02,-102.7	0/1:-36,-4.21,-48	0/0:-0,-7.83,-146	0/0:-0,-10.84,-207.1	0/1:-36,-6.62,-94.4	0/0:-0,-11.44,-221.8	0/0:-0,-9.03,-173	0/0:-0,-9.03,-173.5	0/0:-0,-12.04,-223.4	0/0:-0,-13.25,-251.7	0/0:-0,-10.84,-205.7	0/0:-0,-8.43,-157.6	0/0:-0,-21.07,-408	0/0:-0.6,-12.04,-223.1	0/0:-0,-3.61,-70	0/0:-0,-9.63,-188	chr12	72856133	72856134	XM_025000210.1	LOC100337390	-	249168
chr15	33735041	33735304	SVTYPE=Bov-A2;END=33735304;SVLEN=263;ADJLEFT=33735041;ADJRIGHT=33735304	0/0:-0,-9.03,-177.8	0/0:-2.41,-7.83,-103.51	0/0:-0,-13.25,-261.9	0/0:-0,-12.04,-238.1	0/0:-0,-10.84,-214.3	0/0:-0,-12.04,-240	0/0:-0,-3.01,-58.9	0/0:-0,-9.03,-173.2	0/0:-0,-12.04,-234.3	0/0:-0,-9.03,-172.5	0/0:-0,-9.63,-189.9	0/0:-0,-3.61,-70	0/0:-0,-15.65,-305.1	0/0:-0,-12.64,-239.4	0/0:-0,-7.83,-152.7	0/0:-0,-9.63,-177.1	1/1:-58,-3.01,-0	0/0:-0,-15.65,-311.4	0/0:-0,-7.83,-156	0/0:-0,-9.63,-190.3	0/0:-0,-18.06,-358.1	0/0:-0,-9.63,-181.5	0/0:-0,-8.43,-166.2	0/0:-0.6,-4.21,-70.6	0/0:-0.6,-7.22,-125.7	0/0:-0,-12.04,-235	0/0:-0,-10.24,-204	0/0:-0,-12.64,-248.4	0/0:-0.6,-7.83,-139.6	0/0:-0,-11.44,-223.5	0/0:-0,-7.22,-140	0/0:-0,-13.85,-270.3	0/0:-0,-11.44,-224	0/0:-0,-7.22,-144	0/0:-0,-7.22,-142.2	0/0:-0.6,-3.61,-60.6	0/1:-44.9,-3.01,-10.8	0/0:-0.6,-1.81,-24.6	chr15	33683435	33683436	NM_174345.4	HSPA8	-	51606
chr15	33735041	33735304	SVTYPE=Bov-A2;END=33735304;SVLEN=263;ADJLEFT=33735041;ADJRIGHT=33735304	0/0:-0,-9.03,-177.8	0/0:-2.41,-7.83,-103.51	0/0:-0,-13.25,-261.9	0/0:-0,-12.04,-238.1	0/0:-0,-10.84,-214.3	0/0:-0,-12.04,-240	0/0:-0,-3.01,-58.9	0/0:-0,-9.03,-173.2	0/0:-0,-12.04,-234.3	0/0:-0,-9.03,-172.5	0/0:-0,-9.63,-189.9	0/0:-0,-3.61,-70	0/0:-0,-15.65,-305.1	0/0:-0,-12.64,-239.4	0/0:-0,-7.83,-152.7	0/0:-0,-9.63,-177.1	1/1:-58,-3.01,-0	0/0:-0,-15.65,-311.4	0/0:-0,-7.83,-156	0/0:-0,-9.63,-190.3	0/0:-0,-18.06,-358.1	0/0:-0,-9.63,-181.5	0/0:-0,-8.43,-166.2	0/0:-0.6,-4.21,-70.6	0/0:-0.6,-7.22,-125.7	0/0:-0,-12.04,-235	0/0:-0,-10.24,-204	0/0:-0,-12.64,-248.4	0/0:-0.6,-7.83,-139.6	0/0:-0,-11.44,-223.5	0/0:-0,-7.22,-140	0/0:-0,-13.85,-270.3	0/0:-0,-11.44,-224	0/0:-0,-7.22,-144	0/0:-0,-7.22,-142.2	0/0:-0.6,-3.61,-60.6	0/1:-44.9,-3.01,-10.8	0/0:-0.6,-1.81,-24.6	chr15	33680953	33680954	XR_003029543.1	LOC112441682	-	54088
chr15	33735041	33735304	SVTYPE=Bov-A2;END=33735304;SVLEN=263;ADJLEFT=33735041;ADJRIGHT=33735304	0/0:-0,-9.03,-177.8	0/0:-2.41,-7.83,-103.51	0/0:-0,-13.25,-261.9	0/0:-0,-12.04,-238.1	0/0:-0,-10.84,-214.3	0/0:-0,-12.04,-240	0/0:-0,-3.01,-58.9	0/0:-0,-9.03,-173.2	0/0:-0,-12.04,-234.3	0/0:-0,-9.03,-172.5	0/0:-0,-9.63,-189.9	0/0:-0,-3.61,-70	0/0:-0,-15.65,-305.1	0/0:-0,-12.64,-239.4	0/0:-0,-7.83,-152.7	0/0:-0,-9.63,-177.1	1/1:-58,-3.01,-0	0/0:-0,-15.65,-311.4	0/0:-0,-7.83,-156	0/0:-0,-9.63,-190.3	0/0:-0,-18.06,-358.1	0/0:-0,-9.63,-181.5	0/0:-0,-8.43,-166.2	0/0:-0.6,-4.21,-70.6	0/0:-0.6,-7.22,-125.7	0/0:-0,-12.04,-235	0/0:-0,-10.24,-204	0/0:-0,-12.64,-248.4	0/0:-0.6,-7.83,-139.6	0/0:-0,-11.44,-223.5	0/0:-0,-7.22,-140	0/0:-0,-13.85,-270.3	0/0:-0,-11.44,-224	0/0:-0,-7.22,-144	0/0:-0,-7.22,-142.2	0/0:-0.6,-3.61,-60.6	0/1:-44.9,-3.01,-10.8	0/0:-0.6,-1.81,-24.6	chr15	33679631	33679632	XR_003029544.1	LOC112441683	-	55410
chr15	33735041	33735304	SVTYPE=Bov-A2;END=33735304;SVLEN=263;ADJLEFT=33735041;ADJRIGHT=33735304	0/0:-0,-9.03,-177.8	0/0:-2.41,-7.83,-103.51	0/0:-0,-13.25,-261.9	0/0:-0,-12.04,-238.1	0/0:-0,-10.84,-214.3	0/0:-0,-12.04,-240	0/0:-0,-3.01,-58.9	0/0:-0,-9.03,-173.2	0/0:-0,-12.04,-234.3	0/0:-0,-9.03,-172.5	0/0:-0,-9.63,-189.9	0/0:-0,-3.61,-70	0/0:-0,-15.65,-305.1	0/0:-0,-12.64,-239.4	0/0:-0,-7.83,-152.7	0/0:-0,-9.63,-177.1	1/1:-58,-3.01,-0	0/0:-0,-15.65,-311.4	0/0:-0,-7.83,-156	0/0:-0,-9.63,-190.3	0/0:-0,-18.06,-358.1	0/0:-0,-9.63,-181.5	0/0:-0,-8.43,-166.2	0/0:-0.6,-4.21,-70.6	0/0:-0.6,-7.22,-125.7	0/0:-0,-12.04,-235	0/0:-0,-10.24,-204	0/0:-0,-12.64,-248.4	0/0:-0.6,-7.83,-139.6	0/0:-0,-11.44,-223.5	0/0:-0,-7.22,-140	0/0:-0,-13.85,-270.3	0/0:-0,-11.44,-224	0/0:-0,-7.22,-144	0/0:-0,-7.22,-142.2	0/0:-0.6,-3.61,-60.6	0/1:-44.9,-3.01,-10.8	0/0:-0.6,-1.81,-24.6	chr15	33794264	33794265	NM_001098043.1	CLMP	-	58961
chr15	33735041	33735304	SVTYPE=Bov-A2;END=33735304;SVLEN=263;ADJLEFT=33735041;ADJRIGHT=33735304	0/0:-0,-9.03,-177.8	0/0:-2.41,-7.83,-103.51	0/0:-0,-13.25,-261.9	0/0:-0,-12.04,-238.1	0/0:-0,-10.84,-214.3	0/0:-0,-12.04,-240	0/0:-0,-3.01,-58.9	0/0:-0,-9.03,-173.2	0/0:-0,-12.04,-234.3	0/0:-0,-9.03,-172.5	0/0:-0,-9.63,-189.9	0/0:-0,-3.61,-70	0/0:-0,-15.65,-305.1	0/0:-0,-12.64,-239.4	0/0:-0,-7.83,-152.7	0/0:-0,-9.63,-177.1	1/1:-58,-3.01,-0	0/0:-0,-15.65,-311.4	0/0:-0,-7.83,-156	0/0:-0,-9.63,-190.3	0/0:-0,-18.06,-358.1	0/0:-0,-9.63,-181.5	0/0:-0,-8.43,-166.2	0/0:-0.6,-4.21,-70.6	0/0:-0.6,-7.22,-125.7	0/0:-0,-12.04,-235	0/0:-0,-10.24,-204	0/0:-0,-12.64,-248.4	0/0:-0.6,-7.83,-139.6	0/0:-0,-11.44,-223.5	0/0:-0,-7.22,-140	0/0:-0,-13.85,-270.3	0/0:-0,-11.44,-224	0/0:-0,-7.22,-144	0/0:-0,-7.22,-142.2	0/0:-0.6,-3.61,-60.6	0/1:-44.9,-3.01,-10.8	0/0:-0.6,-1.81,-24.6	chr15	33605808	33605809	XM_024975534.1	BSX	-	129233
chr15	33735041	33735304	SVTYPE=Bov-A2;END=33735304;SVLEN=263;ADJLEFT=33735041;ADJRIGHT=33735304	0/0:-0,-9.03,-177.8	0/0:-2.41,-7.83,-103.51	0/0:-0,-13.25,-261.9	0/0:-0,-12.04,-238.1	0/0:-0,-10.84,-214.3	0/0:-0,-12.04,-240	0/0:-0,-3.01,-58.9	0/0:-0,-9.03,-173.2	0/0:-0,-12.04,-234.3	0/0:-0,-9.03,-172.5	0/0:-0,-9.63,-189.9	0/0:-0,-3.61,-70	0/0:-0,-15.65,-305.1	0/0:-0,-12.64,-239.4	0/0:-0,-7.83,-152.7	0/0:-0,-9.63,-177.1	1/1:-58,-3.01,-0	0/0:-0,-15.65,-311.4	0/0:-0,-7.83,-156	0/0:-0,-9.63,-190.3	0/0:-0,-18.06,-358.1	0/0:-0,-9.63,-181.5	0/0:-0,-8.43,-166.2	0/0:-0.6,-4.21,-70.6	0/0:-0.6,-7.22,-125.7	0/0:-0,-12.04,-235	0/0:-0,-10.24,-204	0/0:-0,-12.64,-248.4	0/0:-0.6,-7.83,-139.6	0/0:-0,-11.44,-223.5	0/0:-0,-7.22,-140	0/0:-0,-13.85,-270.3	0/0:-0,-11.44,-224	0/0:-0,-7.22,-144	0/0:-0,-7.22,-142.2	0/0:-0.6,-3.61,-60.6	0/1:-44.9,-3.01,-10.8	0/0:-0.6,-1.81,-24.6	chr15	33502706	33502707	XM_024975533.1	JHY	+	232335
chr15	46126154	46126432	SVTYPE=Bov-A2;END=46126432;SVLEN=278;ADJLEFT=46126154;ADJRIGHT=0	0/0:-0,-18.06,-355.4	0/0:-1.07,-22.28,-365.2	0/0:-0,-8.43,-167.3	0/0:-0.01,-11.44,-221.5	0/0:-0,-9.63,-192	0/0:-0,-10.24,-199.4	0/0:-0,-9.03,-180	0/0:-0,-16.86,-329.7	0/0:-0,-16.26,-324	0/0:-0.06,-16.86,-312.6	0/0:-0.01,-16.86,-326	0/0:-0.03,-9.63,-170.9	0/0:-0.01,-21.07,-391.9	0/0:-0,-15.65,-310.5	0/0:-0,-11.44,-210.2	0/0:-0,-7.83,-141.2	0/0:-0,-16.26,-311.6	0/0:-0.01,-11.44,-213.8	0/0:-0,-19.27,-379.4	0/0:-0,-14.45,-280.3	0/0:-0,-19.87,-380.9	0/0:-0,-13.85,-257.8	0/0:-0,-10.24,-202	0/0:-0,-8.43,-155.7	0/0:-0.8,-11.44,-188.5	0/1:-94.6,-18.66,-261.2	0/0:-0,-16.86,-331.2	0/0:-0,-13.85,-275.3	0/0:-0,-21.07,-397.6	0/0:-0,-14.45,-283.8	0/0:-0.15,-27.09,-492.5	0/0:-0,-18.06,-354.6	0/0:-0,-16.26,-324	0/1:-24,-4.82,-72	0/0:-0,-15.65,-304	0/0:-0,-7.83,-154.9	0/0:-0,-9.63,-184.4	0/0:-0,-3.01,-60	chr15	46107724	46107725	NM_001105049.1	LOC100125776	-	18430
chr15	46126154	46126432	SVTYPE=Bov-A2;END=46126432;SVLEN=278;ADJLEFT=46126154;ADJRIGHT=0	0/0:-0,-18.06,-355.4	0/0:-1.07,-22.28,-365.2	0/0:-0,-8.43,-167.3	0/0:-0.01,-11.44,-221.5	0/0:-0,-9.63,-192	0/0:-0,-10.24,-199.4	0/0:-0,-9.03,-180	0/0:-0,-16.86,-329.7	0/0:-0,-16.26,-324	0/0:-0.06,-16.86,-312.6	0/0:-0.01,-16.86,-326	0/0:-0.03,-9.63,-170.9	0/0:-0.01,-21.07,-391.9	0/0:-0,-15.65,-310.5	0/0:-0,-11.44,-210.2	0/0:-0,-7.83,-141.2	0/0:-0,-16.26,-311.6	0/0:-0.01,-11.44,-213.8	0/0:-0,-19.27,-379.4	0/0:-0,-14.45,-280.3	0/0:-0,-19.87,-380.9	0/0:-0,-13.85,-257.8	0/0:-0,-10.24,-202	0/0:-0,-8.43,-155.7	0/0:-0.8,-11.44,-188.5	0/1:-94.6,-18.66,-261.2	0/0:-0,-16.86,-331.2	0/0:-0,-13.85,-275.3	0/0:-0,-21.07,-397.6	0/0:-0,-14.45,-283.8	0/0:-0.15,-27.09,-492.5	0/0:-0,-18.06,-354.6	0/0:-0,-16.26,-324	0/1:-24,-4.82,-72	0/0:-0,-15.65,-304	0/0:-0,-7.83,-154.9	0/0:-0,-9.63,-184.4	0/0:-0,-3.01,-60	chr15	46101588	46101589	XR_003029476.1	LOC783299	-	24566
chr15	46126154	46126432	SVTYPE=Bov-A2;END=46126432;SVLEN=278;ADJLEFT=46126154;ADJRIGHT=0	0/0:-0,-18.06,-355.4	0/0:-1.07,-22.28,-365.2	0/0:-0,-8.43,-167.3	0/0:-0.01,-11.44,-221.5	0/0:-0,-9.63,-192	0/0:-0,-10.24,-199.4	0/0:-0,-9.03,-180	0/0:-0,-16.86,-329.7	0/0:-0,-16.26,-324	0/0:-0.06,-16.86,-312.6	0/0:-0.01,-16.86,-326	0/0:-0.03,-9.63,-170.9	0/0:-0.01,-21.07,-391.9	0/0:-0,-15.65,-310.5	0/0:-0,-11.44,-210.2	0/0:-0,-7.83,-141.2	0/0:-0,-16.26,-311.6	0/0:-0.01,-11.44,-213.8	0/0:-0,-19.27,-379.4	0/0:-0,-14.45,-280.3	0/0:-0,-19.87,-380.9	0/0:-0,-13.85,-257.8	0/0:-0,-10.24,-202	0/0:-0,-8.43,-155.7	0/0:-0.8,-11.44,-188.5	0/1:-94.6,-18.66,-261.2	0/0:-0,-16.86,-331.2	0/0:-0,-13.85,-275.3	0/0:-0,-21.07,-397.6	0/0:-0,-14.45,-283.8	0/0:-0.15,-27.09,-492.5	0/0:-0,-18.06,-354.6	0/0:-0,-16.26,-324	0/1:-24,-4.82,-72	0/0:-0,-15.65,-304	0/0:-0,-7.83,-154.9	0/0:-0,-9.63,-184.4	0/0:-0,-3.01,-60	chr15	46093817	46093818	XM_002693147.4	OR2AG2	-	32337
chr15	46126154	46126432	SVTYPE=Bov-A2;END=46126432;SVLEN=278;ADJLEFT=46126154;ADJRIGHT=0	0/0:-0,-18.06,-355.4	0/0:-1.07,-22.28,-365.2	0/0:-0,-8.43,-167.3	0/0:-0.01,-11.44,-221.5	0/0:-0,-9.63,-192	0/0:-0,-10.24,-199.4	0/0:-0,-9.03,-180	0/0:-0,-16.86,-329.7	0/0:-0,-16.26,-324	0/0:-0.06,-16.86,-312.6	0/0:-0.01,-16.86,-326	0/0:-0.03,-9.63,-170.9	0/0:-0.01,-21.07,-391.9	0/0:-0,-15.65,-310.5	0/0:-0,-11.44,-210.2	0/0:-0,-7.83,-141.2	0/0:-0,-16.26,-311.6	0/0:-0.01,-11.44,-213.8	0/0:-0,-19.27,-379.4	0/0:-0,-14.45,-280.3	0/0:-0,-19.87,-380.9	0/0:-0,-13.85,-257.8	0/0:-0,-10.24,-202	0/0:-0,-8.43,-155.7	0/0:-0.8,-11.44,-188.5	0/1:-94.6,-18.66,-261.2	0/0:-0,-16.86,-331.2	0/0:-0,-13.85,-275.3	0/0:-0,-21.07,-397.6	0/0:-0,-14.45,-283.8	0/0:-0.15,-27.09,-492.5	0/0:-0,-18.06,-354.6	0/0:-0,-16.26,-324	0/1:-24,-4.82,-72	0/0:-0,-15.65,-304	0/0:-0,-7.83,-154.9	0/0:-0,-9.63,-184.4	0/0:-0,-3.01,-60	chr15	46071990	46071991	XM_024975837.1	LOC112441631	-	54164
chr15	46126154	46126432	SVTYPE=Bov-A2;END=46126432;SVLEN=278;ADJLEFT=46126154;ADJRIGHT=0	0/0:-0,-18.06,-355.4	0/0:-1.07,-22.28,-365.2	0/0:-0,-8.43,-167.3	0/0:-0.01,-11.44,-221.5	0/0:-0,-9.63,-192	0/0:-0,-10.24,-199.4	0/0:-0,-9.03,-180	0/0:-0,-16.86,-329.7	0/0:-0,-16.26,-324	0/0:-0.06,-16.86,-312.6	0/0:-0.01,-16.86,-326	0/0:-0.03,-9.63,-170.9	0/0:-0.01,-21.07,-391.9	0/0:-0,-15.65,-310.5	0/0:-0,-11.44,-210.2	0/0:-0,-7.83,-141.2	0/0:-0,-16.26,-311.6	0/0:-0.01,-11.44,-213.8	0/0:-0,-19.27,-379.4	0/0:-0,-14.45,-280.3	0/0:-0,-19.87,-380.9	0/0:-0,-13.85,-257.8	0/0:-0,-10.24,-202	0/0:-0,-8.43,-155.7	0/0:-0.8,-11.44,-188.5	0/1:-94.6,-18.66,-261.2	0/0:-0,-16.86,-331.2	0/0:-0,-13.85,-275.3	0/0:-0,-21.07,-397.6	0/0:-0,-14.45,-283.8	0/0:-0.15,-27.09,-492.5	0/0:-0,-18.06,-354.6	0/0:-0,-16.26,-324	0/1:-24,-4.82,-72	0/0:-0,-15.65,-304	0/0:-0,-7.83,-154.9	0/0:-0,-9.63,-184.4	0/0:-0,-3.01,-60	chr15	46183547	46183548	XR_001501942.2	LOC101903126	+	57116
chr15	46126154	46126432	SVTYPE=Bov-A2;END=46126432;SVLEN=278;ADJLEFT=46126154;ADJRIGHT=0	0/0:-0,-18.06,-355.4	0/0:-1.07,-22.28,-365.2	0/0:-0,-8.43,-167.3	0/0:-0.01,-11.44,-221.5	0/0:-0,-9.63,-192	0/0:-0,-10.24,-199.4	0/0:-0,-9.03,-180	0/0:-0,-16.86,-329.7	0/0:-0,-16.26,-324	0/0:-0.06,-16.86,-312.6	0/0:-0.01,-16.86,-326	0/0:-0.03,-9.63,-170.9	0/0:-0.01,-21.07,-391.9	0/0:-0,-15.65,-310.5	0/0:-0,-11.44,-210.2	0/0:-0,-7.83,-141.2	0/0:-0,-16.26,-311.6	0/0:-0.01,-11.44,-213.8	0/0:-0,-19.27,-379.4	0/0:-0,-14.45,-280.3	0/0:-0,-19.87,-380.9	0/0:-0,-13.85,-257.8	0/0:-0,-10.24,-202	0/0:-0,-8.43,-155.7	0/0:-0.8,-11.44,-188.5	0/1:-94.6,-18.66,-261.2	0/0:-0,-16.86,-331.2	0/0:-0,-13.85,-275.3	0/0:-0,-21.07,-397.6	0/0:-0,-14.45,-283.8	0/0:-0.15,-27.09,-492.5	0/0:-0,-18.06,-354.6	0/0:-0,-16.26,-324	0/1:-24,-4.82,-72	0/0:-0,-15.65,-304	0/0:-0,-7.83,-154.9	0/0:-0,-9.63,-184.4	0/0:-0,-3.01,-60	chr15	46053126	46053127	XM_002693148.2	OR2AG1	-	73028
chr15	46126154	46126432	SVTYPE=Bov-A2;END=46126432;SVLEN=278;ADJLEFT=46126154;ADJRIGHT=0	0/0:-0,-18.06,-355.4	0/0:-1.07,-22.28,-365.2	0/0:-0,-8.43,-167.3	0/0:-0.01,-11.44,-221.5	0/0:-0,-9.63,-192	0/0:-0,-10.24,-199.4	0/0:-0,-9.03,-180	0/0:-0,-16.86,-329.7	0/0:-0,-16.26,-324	0/0:-0.06,-16.86,-312.6	0/0:-0.01,-16.86,-326	0/0:-0.03,-9.63,-170.9	0/0:-0.01,-21.07,-391.9	0/0:-0,-15.65,-310.5	0/0:-0,-11.44,-210.2	0/0:-0,-7.83,-141.2	0/0:-0,-16.26,-311.6	0/0:-0.01,-11.44,-213.8	0/0:-0,-19.27,-379.4	0/0:-0,-14.45,-280.3	0/0:-0,-19.87,-380.9	0/0:-0,-13.85,-257.8	0/0:-0,-10.24,-202	0/0:-0,-8.43,-155.7	0/0:-0.8,-11.44,-188.5	0/1:-94.6,-18.66,-261.2	0/0:-0,-16.86,-331.2	0/0:-0,-13.85,-275.3	0/0:-0,-21.07,-397.6	0/0:-0,-14.45,-283.8	0/0:-0.15,-27.09,-492.5	0/0:-0,-18.06,-354.6	0/0:-0,-16.26,-324	0/1:-24,-4.82,-72	0/0:-0,-15.65,-304	0/0:-0,-7.83,-154.9	0/0:-0,-9.63,-184.4	0/0:-0,-3.01,-60	chr15	46029872	46029873	XR_003029560.1	LOC112441699	+	96282
chr15	46126154	46126432	SVTYPE=Bov-A2;END=46126432;SVLEN=278;ADJLEFT=46126154;ADJRIGHT=0	0/0:-0,-18.06,-355.4	0/0:-1.07,-22.28,-365.2	0/0:-0,-8.43,-167.3	0/0:-0.01,-11.44,-221.5	0/0:-0,-9.63,-192	0/0:-0,-10.24,-199.4	0/0:-0,-9.03,-180	0/0:-0,-16.86,-329.7	0/0:-0,-16.26,-324	0/0:-0.06,-16.86,-312.6	0/0:-0.01,-16.86,-326	0/0:-0.03,-9.63,-170.9	0/0:-0.01,-21.07,-391.9	0/0:-0,-15.65,-310.5	0/0:-0,-11.44,-210.2	0/0:-0,-7.83,-141.2	0/0:-0,-16.26,-311.6	0/0:-0.01,-11.44,-213.8	0/0:-0,-19.27,-379.4	0/0:-0,-14.45,-280.3	0/0:-0,-19.87,-380.9	0/0:-0,-13.85,-257.8	0/0:-0,-10.24,-202	0/0:-0,-8.43,-155.7	0/0:-0.8,-11.44,-188.5	0/1:-94.6,-18.66,-261.2	0/0:-0,-16.86,-331.2	0/0:-0,-13.85,-275.3	0/0:-0,-21.07,-397.6	0/0:-0,-14.45,-283.8	0/0:-0.15,-27.09,-492.5	0/0:-0,-18.06,-354.6	0/0:-0,-16.26,-324	0/1:-24,-4.82,-72	0/0:-0,-15.65,-304	0/0:-0,-7.83,-154.9	0/0:-0,-9.63,-184.4	0/0:-0,-3.01,-60	chr15	46025556	46025557	XM_010812593.2	LOC100336980	-	100598
chr15	46126154	46126432	SVTYPE=Bov-A2;END=46126432;SVLEN=278;ADJLEFT=46126154;ADJRIGHT=0	0/0:-0,-18.06,-355.4	0/0:-1.07,-22.28,-365.2	0/0:-0,-8.43,-167.3	0/0:-0.01,-11.44,-221.5	0/0:-0,-9.63,-192	0/0:-0,-10.24,-199.4	0/0:-0,-9.03,-180	0/0:-0,-16.86,-329.7	0/0:-0,-16.26,-324	0/0:-0.06,-16.86,-312.6	0/0:-0.01,-16.86,-326	0/0:-0.03,-9.63,-170.9	0/0:-0.01,-21.07,-391.9	0/0:-0,-15.65,-310.5	0/0:-0,-11.44,-210.2	0/0:-0,-7.83,-141.2	0/0:-0,-16.26,-311.6	0/0:-0.01,-11.44,-213.8	0/0:-0,-19.27,-379.4	0/0:-0,-14.45,-280.3	0/0:-0,-19.87,-380.9	0/0:-0,-13.85,-257.8	0/0:-0,-10.24,-202	0/0:-0,-8.43,-155.7	0/0:-0.8,-11.44,-188.5	0/1:-94.6,-18.66,-261.2	0/0:-0,-16.86,-331.2	0/0:-0,-13.85,-275.3	0/0:-0,-21.07,-397.6	0/0:-0,-14.45,-283.8	0/0:-0.15,-27.09,-492.5	0/0:-0,-18.06,-354.6	0/0:-0,-16.26,-324	0/1:-24,-4.82,-72	0/0:-0,-15.65,-304	0/0:-0,-7.83,-154.9	0/0:-0,-9.63,-184.4	0/0:-0,-3.01,-60	chr15	46014079	46014080	XM_002693167.4	LOC511622	+	112075
chr15	46126154	46126432	SVTYPE=Bov-A2;END=46126432;SVLEN=278;ADJLEFT=46126154;ADJRIGHT=0	0/0:-0,-18.06,-355.4	0/0:-1.07,-22.28,-365.2	0/0:-0,-8.43,-167.3	0/0:-0.01,-11.44,-221.5	0/0:-0,-9.63,-192	0/0:-0,-10.24,-199.4	0/0:-0,-9.03,-180	0/0:-0,-16.86,-329.7	0/0:-0,-16.26,-324	0/0:-0.06,-16.86,-312.6	0/0:-0.01,-16.86,-326	0/0:-0.03,-9.63,-170.9	0/0:-0.01,-21.07,-391.9	0/0:-0,-15.65,-310.5	0/0:-0,-11.44,-210.2	0/0:-0,-7.83,-141.2	0/0:-0,-16.26,-311.6	0/0:-0.01,-11.44,-213.8	0/0:-0,-19.27,-379.4	0/0:-0,-14.45,-280.3	0/0:-0,-19.87,-380.9	0/0:-0,-13.85,-257.8	0/0:-0,-10.24,-202	0/0:-0,-8.43,-155.7	0/0:-0.8,-11.44,-188.5	0/1:-94.6,-18.66,-261.2	0/0:-0,-16.86,-331.2	0/0:-0,-13.85,-275.3	0/0:-0,-21.07,-397.6	0/0:-0,-14.45,-283.8	0/0:-0.15,-27.09,-492.5	0/0:-0,-18.06,-354.6	0/0:-0,-16.26,-324	0/1:-24,-4.82,-72	0/0:-0,-15.65,-304	0/0:-0,-7.83,-154.9	0/0:-0,-9.63,-184.4	0/0:-0,-3.01,-60	chr15	46259339	46259340	XR_003029478.1	LOC112441632	-	132908
chr15	46126154	46126432	SVTYPE=Bov-A2;END=46126432;SVLEN=278;ADJLEFT=46126154;ADJRIGHT=0	0/0:-0,-18.06,-355.4	0/0:-1.07,-22.28,-365.2	0/0:-0,-8.43,-167.3	0/0:-0.01,-11.44,-221.5	0/0:-0,-9.63,-192	0/0:-0,-10.24,-199.4	0/0:-0,-9.03,-180	0/0:-0,-16.86,-329.7	0/0:-0,-16.26,-324	0/0:-0.06,-16.86,-312.6	0/0:-0.01,-16.86,-326	0/0:-0.03,-9.63,-170.9	0/0:-0.01,-21.07,-391.9	0/0:-0,-15.65,-310.5	0/0:-0,-11.44,-210.2	0/0:-0,-7.83,-141.2	0/0:-0,-16.26,-311.6	0/0:-0.01,-11.44,-213.8	0/0:-0,-19.27,-379.4	0/0:-0,-14.45,-280.3	0/0:-0,-19.87,-380.9	0/0:-0,-13.85,-257.8	0/0:-0,-10.24,-202	0/0:-0,-8.43,-155.7	0/0:-0.8,-11.44,-188.5	0/1:-94.6,-18.66,-261.2	0/0:-0,-16.86,-331.2	0/0:-0,-13.85,-275.3	0/0:-0,-21.07,-397.6	0/0:-0,-14.45,-283.8	0/0:-0.15,-27.09,-492.5	0/0:-0,-18.06,-354.6	0/0:-0,-16.26,-324	0/1:-24,-4.82,-72	0/0:-0,-15.65,-304	0/0:-0,-7.83,-154.9	0/0:-0,-9.63,-184.4	0/0:-0,-3.01,-60	chr15	45990809	45990810	XM_002693144.4	LOC100336956	+	135345
chr15	46126154	46126432	SVTYPE=Bov-A2;END=46126432;SVLEN=278;ADJLEFT=46126154;ADJRIGHT=0	0/0:-0,-18.06,-355.4	0/0:-1.07,-22.28,-365.2	0/0:-0,-8.43,-167.3	0/0:-0.01,-11.44,-221.5	0/0:-0,-9.63,-192	0/0:-0,-10.24,-199.4	0/0:-0,-9.03,-180	0/0:-0,-16.86,-329.7	0/0:-0,-16.26,-324	0/0:-0.06,-16.86,-312.6	0/0:-0.01,-16.86,-326	0/0:-0.03,-9.63,-170.9	0/0:-0.01,-21.07,-391.9	0/0:-0,-15.65,-310.5	0/0:-0,-11.44,-210.2	0/0:-0,-7.83,-141.2	0/0:-0,-16.26,-311.6	0/0:-0.01,-11.44,-213.8	0/0:-0,-19.27,-379.4	0/0:-0,-14.45,-280.3	0/0:-0,-19.87,-380.9	0/0:-0,-13.85,-257.8	0/0:-0,-10.24,-202	0/0:-0,-8.43,-155.7	0/0:-0.8,-11.44,-188.5	0/1:-94.6,-18.66,-261.2	0/0:-0,-16.86,-331.2	0/0:-0,-13.85,-275.3	0/0:-0,-21.07,-397.6	0/0:-0,-14.45,-283.8	0/0:-0.15,-27.09,-492.5	0/0:-0,-18.06,-354.6	0/0:-0,-16.26,-324	0/1:-24,-4.82,-72	0/0:-0,-15.65,-304	0/0:-0,-7.83,-154.9	0/0:-0,-9.63,-184.4	0/0:-0,-3.01,-60	chr15	45981879	45981880	NM_001206767.1	LOC530354	+	144275
chr15	46126154	46126432	SVTYPE=Bov-A2;END=46126432;SVLEN=278;ADJLEFT=46126154;ADJRIGHT=0	0/0:-0,-18.06,-355.4	0/0:-1.07,-22.28,-365.2	0/0:-0,-8.43,-167.3	0/0:-0.01,-11.44,-221.5	0/0:-0,-9.63,-192	0/0:-0,-10.24,-199.4	0/0:-0,-9.03,-180	0/0:-0,-16.86,-329.7	0/0:-0,-16.26,-324	0/0:-0.06,-16.86,-312.6	0/0:-0.01,-16.86,-326	0/0:-0.03,-9.63,-170.9	0/0:-0.01,-21.07,-391.9	0/0:-0,-15.65,-310.5	0/0:-0,-11.44,-210.2	0/0:-0,-7.83,-141.2	0/0:-0,-16.26,-311.6	0/0:-0.01,-11.44,-213.8	0/0:-0,-19.27,-379.4	0/0:-0,-14.45,-280.3	0/0:-0,-19.87,-380.9	0/0:-0,-13.85,-257.8	0/0:-0,-10.24,-202	0/0:-0,-8.43,-155.7	0/0:-0.8,-11.44,-188.5	0/1:-94.6,-18.66,-261.2	0/0:-0,-16.86,-331.2	0/0:-0,-13.85,-275.3	0/0:-0,-21.07,-397.6	0/0:-0,-14.45,-283.8	0/0:-0.15,-27.09,-492.5	0/0:-0,-18.06,-354.6	0/0:-0,-16.26,-324	0/1:-24,-4.82,-72	0/0:-0,-15.65,-304	0/0:-0,-7.83,-154.9	0/0:-0,-9.63,-184.4	0/0:-0,-3.01,-60	chr15	46277162	46277163	XR_811548.3	LOC104974257	-	150731
chr15	46126154	46126432	SVTYPE=Bov-A2;END=46126432;SVLEN=278;ADJLEFT=46126154;ADJRIGHT=0	0/0:-0,-18.06,-355.4	0/0:-1.07,-22.28,-365.2	0/0:-0,-8.43,-167.3	0/0:-0.01,-11.44,-221.5	0/0:-0,-9.63,-192	0/0:-0,-10.24,-199.4	0/0:-0,-9.03,-180	0/0:-0,-16.86,-329.7	0/0:-0,-16.26,-324	0/0:-0.06,-16.86,-312.6	0/0:-0.01,-16.86,-326	0/0:-0.03,-9.63,-170.9	0/0:-0.01,-21.07,-391.9	0/0:-0,-15.65,-310.5	0/0:-0,-11.44,-210.2	0/0:-0,-7.83,-141.2	0/0:-0,-16.26,-311.6	0/0:-0.01,-11.44,-213.8	0/0:-0,-19.27,-379.4	0/0:-0,-14.45,-280.3	0/0:-0,-19.87,-380.9	0/0:-0,-13.85,-257.8	0/0:-0,-10.24,-202	0/0:-0,-8.43,-155.7	0/0:-0.8,-11.44,-188.5	0/1:-94.6,-18.66,-261.2	0/0:-0,-16.86,-331.2	0/0:-0,-13.85,-275.3	0/0:-0,-21.07,-397.6	0/0:-0,-14.45,-283.8	0/0:-0.15,-27.09,-492.5	0/0:-0,-18.06,-354.6	0/0:-0,-16.26,-324	0/1:-24,-4.82,-72	0/0:-0,-15.65,-304	0/0:-0,-7.83,-154.9	0/0:-0,-9.63,-184.4	0/0:-0,-3.01,-60	chr15	46277369	46277370	NM_001075293.2	LOC506989	+	150938
chr15	46126154	46126432	SVTYPE=Bov-A2;END=46126432;SVLEN=278;ADJLEFT=46126154;ADJRIGHT=0	0/0:-0,-18.06,-355.4	0/0:-1.07,-22.28,-365.2	0/0:-0,-8.43,-167.3	0/0:-0.01,-11.44,-221.5	0/0:-0,-9.63,-192	0/0:-0,-10.24,-199.4	0/0:-0,-9.03,-180	0/0:-0,-16.86,-329.7	0/0:-0,-16.26,-324	0/0:-0.06,-16.86,-312.6	0/0:-0.01,-16.86,-326	0/0:-0.03,-9.63,-170.9	0/0:-0.01,-21.07,-391.9	0/0:-0,-15.65,-310.5	0/0:-0,-11.44,-210.2	0/0:-0,-7.83,-141.2	0/0:-0,-16.26,-311.6	0/0:-0.01,-11.44,-213.8	0/0:-0,-19.27,-379.4	0/0:-0,-14.45,-280.3	0/0:-0,-19.87,-380.9	0/0:-0,-13.85,-257.8	0/0:-0,-10.24,-202	0/0:-0,-8.43,-155.7	0/0:-0.8,-11.44,-188.5	0/1:-94.6,-18.66,-261.2	0/0:-0,-16.86,-331.2	0/0:-0,-13.85,-275.3	0/0:-0,-21.07,-397.6	0/0:-0,-14.45,-283.8	0/0:-0.15,-27.09,-492.5	0/0:-0,-18.06,-354.6	0/0:-0,-16.26,-324	0/1:-24,-4.82,-72	0/0:-0,-15.65,-304	0/0:-0,-7.83,-154.9	0/0:-0,-9.63,-184.4	0/0:-0,-3.01,-60	chr15	45960176	45960177	XM_005216132.4	LOC516636	+	165978
chr15	46126154	46126432	SVTYPE=Bov-A2;END=46126432;SVLEN=278;ADJLEFT=46126154;ADJRIGHT=0	0/0:-0,-18.06,-355.4	0/0:-1.07,-22.28,-365.2	0/0:-0,-8.43,-167.3	0/0:-0.01,-11.44,-221.5	0/0:-0,-9.63,-192	0/0:-0,-10.24,-199.4	0/0:-0,-9.03,-180	0/0:-0,-16.86,-329.7	0/0:-0,-16.26,-324	0/0:-0.06,-16.86,-312.6	0/0:-0.01,-16.86,-326	0/0:-0.03,-9.63,-170.9	0/0:-0.01,-21.07,-391.9	0/0:-0,-15.65,-310.5	0/0:-0,-11.44,-210.2	0/0:-0,-7.83,-141.2	0/0:-0,-16.26,-311.6	0/0:-0.01,-11.44,-213.8	0/0:-0,-19.27,-379.4	0/0:-0,-14.45,-280.3	0/0:-0,-19.87,-380.9	0/0:-0,-13.85,-257.8	0/0:-0,-10.24,-202	0/0:-0,-8.43,-155.7	0/0:-0.8,-11.44,-188.5	0/1:-94.6,-18.66,-261.2	0/0:-0,-16.86,-331.2	0/0:-0,-13.85,-275.3	0/0:-0,-21.07,-397.6	0/0:-0,-14.45,-283.8	0/0:-0.15,-27.09,-492.5	0/0:-0,-18.06,-354.6	0/0:-0,-16.26,-324	0/1:-24,-4.82,-72	0/0:-0,-15.65,-304	0/0:-0,-7.83,-154.9	0/0:-0,-9.63,-184.4	0/0:-0,-3.01,-60	chr15	45942362	45942363	XM_024975581.1	LOC112441546	+	183792
chr15	46126154	46126432	SVTYPE=Bov-A2;END=46126432;SVLEN=278;ADJLEFT=46126154;ADJRIGHT=0	0/0:-0,-18.06,-355.4	0/0:-1.07,-22.28,-365.2	0/0:-0,-8.43,-167.3	0/0:-0.01,-11.44,-221.5	0/0:-0,-9.63,-192	0/0:-0,-10.24,-199.4	0/0:-0,-9.03,-180	0/0:-0,-16.86,-329.7	0/0:-0,-16.26,-324	0/0:-0.06,-16.86,-312.6	0/0:-0.01,-16.86,-326	0/0:-0.03,-9.63,-170.9	0/0:-0.01,-21.07,-391.9	0/0:-0,-15.65,-310.5	0/0:-0,-11.44,-210.2	0/0:-0,-7.83,-141.2	0/0:-0,-16.26,-311.6	0/0:-0.01,-11.44,-213.8	0/0:-0,-19.27,-379.4	0/0:-0,-14.45,-280.3	0/0:-0,-19.87,-380.9	0/0:-0,-13.85,-257.8	0/0:-0,-10.24,-202	0/0:-0,-8.43,-155.7	0/0:-0.8,-11.44,-188.5	0/1:-94.6,-18.66,-261.2	0/0:-0,-16.86,-331.2	0/0:-0,-13.85,-275.3	0/0:-0,-21.07,-397.6	0/0:-0,-14.45,-283.8	0/0:-0.15,-27.09,-492.5	0/0:-0,-18.06,-354.6	0/0:-0,-16.26,-324	0/1:-24,-4.82,-72	0/0:-0,-15.65,-304	0/0:-0,-7.83,-154.9	0/0:-0,-9.63,-184.4	0/0:-0,-3.01,-60	chr15	46322325	46322326	XM_015474717.2	LOC783920	+	195894
chr15	46126154	46126432	SVTYPE=Bov-A2;END=46126432;SVLEN=278;ADJLEFT=46126154;ADJRIGHT=0	0/0:-0,-18.06,-355.4	0/0:-1.07,-22.28,-365.2	0/0:-0,-8.43,-167.3	0/0:-0.01,-11.44,-221.5	0/0:-0,-9.63,-192	0/0:-0,-10.24,-199.4	0/0:-0,-9.03,-180	0/0:-0,-16.86,-329.7	0/0:-0,-16.26,-324	0/0:-0.06,-16.86,-312.6	0/0:-0.01,-16.86,-326	0/0:-0.03,-9.63,-170.9	0/0:-0.01,-21.07,-391.9	0/0:-0,-15.65,-310.5	0/0:-0,-11.44,-210.2	0/0:-0,-7.83,-141.2	0/0:-0,-16.26,-311.6	0/0:-0.01,-11.44,-213.8	0/0:-0,-19.27,-379.4	0/0:-0,-14.45,-280.3	0/0:-0,-19.87,-380.9	0/0:-0,-13.85,-257.8	0/0:-0,-10.24,-202	0/0:-0,-8.43,-155.7	0/0:-0.8,-11.44,-188.5	0/1:-94.6,-18.66,-261.2	0/0:-0,-16.86,-331.2	0/0:-0,-13.85,-275.3	0/0:-0,-21.07,-397.6	0/0:-0,-14.45,-283.8	0/0:-0.15,-27.09,-492.5	0/0:-0,-18.06,-354.6	0/0:-0,-16.26,-324	0/1:-24,-4.82,-72	0/0:-0,-15.65,-304	0/0:-0,-7.83,-154.9	0/0:-0,-9.63,-184.4	0/0:-0,-3.01,-60	chr15	45915863	45915864	XM_024975580.1	LOC112441545	+	210291
chr15	46126154	46126432	SVTYPE=Bov-A2;END=46126432;SVLEN=278;ADJLEFT=46126154;ADJRIGHT=0	0/0:-0,-18.06,-355.4	0/0:-1.07,-22.28,-365.2	0/0:-0,-8.43,-167.3	0/0:-0.01,-11.44,-221.5	0/0:-0,-9.63,-192	0/0:-0,-10.24,-199.4	0/0:-0,-9.03,-180	0/0:-0,-16.86,-329.7	0/0:-0,-16.26,-324	0/0:-0.06,-16.86,-312.6	0/0:-0.01,-16.86,-326	0/0:-0.03,-9.63,-170.9	0/0:-0.01,-21.07,-391.9	0/0:-0,-15.65,-310.5	0/0:-0,-11.44,-210.2	0/0:-0,-7.83,-141.2	0/0:-0,-16.26,-311.6	0/0:-0.01,-11.44,-213.8	0/0:-0,-19.27,-379.4	0/0:-0,-14.45,-280.3	0/0:-0,-19.87,-380.9	0/0:-0,-13.85,-257.8	0/0:-0,-10.24,-202	0/0:-0,-8.43,-155.7	0/0:-0.8,-11.44,-188.5	0/1:-94.6,-18.66,-261.2	0/0:-0,-16.86,-331.2	0/0:-0,-13.85,-275.3	0/0:-0,-21.07,-397.6	0/0:-0,-14.45,-283.8	0/0:-0.15,-27.09,-492.5	0/0:-0,-18.06,-354.6	0/0:-0,-16.26,-324	0/1:-24,-4.82,-72	0/0:-0,-15.65,-304	0/0:-0,-7.83,-154.9	0/0:-0,-9.63,-184.4	0/0:-0,-3.01,-60	chr15	45914137	45914138	XM_002685934.4	LOC100337392	+	212017
chr15	46126154	46126432	SVTYPE=Bov-A2;END=46126432;SVLEN=278;ADJLEFT=46126154;ADJRIGHT=0	0/0:-0,-18.06,-355.4	0/0:-1.07,-22.28,-365.2	0/0:-0,-8.43,-167.3	0/0:-0.01,-11.44,-221.5	0/0:-0,-9.63,-192	0/0:-0,-10.24,-199.4	0/0:-0,-9.03,-180	0/0:-0,-16.86,-329.7	0/0:-0,-16.26,-324	0/0:-0.06,-16.86,-312.6	0/0:-0.01,-16.86,-326	0/0:-0.03,-9.63,-170.9	0/0:-0.01,-21.07,-391.9	0/0:-0,-15.65,-310.5	0/0:-0,-11.44,-210.2	0/0:-0,-7.83,-141.2	0/0:-0,-16.26,-311.6	0/0:-0.01,-11.44,-213.8	0/0:-0,-19.27,-379.4	0/0:-0,-14.45,-280.3	0/0:-0,-19.87,-380.9	0/0:-0,-13.85,-257.8	0/0:-0,-10.24,-202	0/0:-0,-8.43,-155.7	0/0:-0.8,-11.44,-188.5	0/1:-94.6,-18.66,-261.2	0/0:-0,-16.86,-331.2	0/0:-0,-13.85,-275.3	0/0:-0,-21.07,-397.6	0/0:-0,-14.45,-283.8	0/0:-0.15,-27.09,-492.5	0/0:-0,-18.06,-354.6	0/0:-0,-16.26,-324	0/1:-24,-4.82,-72	0/0:-0,-15.65,-304	0/0:-0,-7.83,-154.9	0/0:-0,-9.63,-184.4	0/0:-0,-3.01,-60	chr15	45905904	45905905	XM_002683750.4	OR6A2	+	220250
chr15	46200449	46200732	SVTYPE=Bov-A2;END=46200732;SVLEN=283;ADJLEFT=46200449;ADJRIGHT=46200732	0/1:-69.7,-19.27,-312	0/1:-50.3,-13.85,-209.4	0/0:-0,-7.83,-156	0/0:-0,-13.85,-276	0/1:-36,-8.43,-131.5	0/1:-36,-16.26,-288	0/0:-0,-16.26,-323	0/0:-0.6,-13.85,-262.6	0/0:-0,-10.84,-214.8	0/1:-65.1,-12.04,-164	0/0:-0.6,-10.84,-203.9	0/1:-48,-10.84,-166.5	0/0:-0.6,-15.05,-285.3	0/0:-0,-10.24,-204	0/0:-0,-7.83,-155.3	0/0:-0,-6.02,-114	0/0:-1.2,-12.64,-229.2	0/0:-1.2,-10.24,-181.2	0/1:-33.3,-12.04,-203.4	0/0:-2.41,-11.44,-182.41	0/1:-43.7,-6.62,-84.01	0/0:-1.2,-9.03,-154.2	0/0:-0,-7.22,-144	0/1:-114,-17.46,-222.2	0/1:-66.4,-10.84,-143	0/1:-153.4,-21.07,-245.03	0/0:-0.66,-16.86,-316.2	0/0:-0,-8.43,-166	0/1:-48,-15.05,-249.2	0/0:-0,-13.85,-276	0/0:-0,-21.07,-408.6	0/0:-3.01,-15.05,-241.21	0/0:-0.6,-7.22,-132.2	0/1:-205.3,-22.28,-227.1	0/0:-1.2,-13.25,-241.2	0/1:-68.91,-9.03,-103.7	0/1:-99,-15.05,-190.3	0/0:-0,-10.24,-204	chr15	46183547	46183548	XR_001501942.2	LOC101903126	+	16902
chr15	46200449	46200732	SVTYPE=Bov-A2;END=46200732;SVLEN=283;ADJLEFT=46200449;ADJRIGHT=46200732	0/1:-69.7,-19.27,-312	0/1:-50.3,-13.85,-209.4	0/0:-0,-7.83,-156	0/0:-0,-13.85,-276	0/1:-36,-8.43,-131.5	0/1:-36,-16.26,-288	0/0:-0,-16.26,-323	0/0:-0.6,-13.85,-262.6	0/0:-0,-10.84,-214.8	0/1:-65.1,-12.04,-164	0/0:-0.6,-10.84,-203.9	0/1:-48,-10.84,-166.5	0/0:-0.6,-15.05,-285.3	0/0:-0,-10.24,-204	0/0:-0,-7.83,-155.3	0/0:-0,-6.02,-114	0/0:-1.2,-12.64,-229.2	0/0:-1.2,-10.24,-181.2	0/1:-33.3,-12.04,-203.4	0/0:-2.41,-11.44,-182.41	0/1:-43.7,-6.62,-84.01	0/0:-1.2,-9.03,-154.2	0/0:-0,-7.22,-144	0/1:-114,-17.46,-222.2	0/1:-66.4,-10.84,-143	0/1:-153.4,-21.07,-245.03	0/0:-0.66,-16.86,-316.2	0/0:-0,-8.43,-166	0/1:-48,-15.05,-249.2	0/0:-0,-13.85,-276	0/0:-0,-21.07,-408.6	0/0:-3.01,-15.05,-241.21	0/0:-0.6,-7.22,-132.2	0/1:-205.3,-22.28,-227.1	0/0:-1.2,-13.25,-241.2	0/1:-68.91,-9.03,-103.7	0/1:-99,-15.05,-190.3	0/0:-0,-10.24,-204	chr15	46259339	46259340	XR_003029478.1	LOC112441632	-	58608
chr15	46200449	46200732	SVTYPE=Bov-A2;END=46200732;SVLEN=283;ADJLEFT=46200449;ADJRIGHT=46200732	0/1:-69.7,-19.27,-312	0/1:-50.3,-13.85,-209.4	0/0:-0,-7.83,-156	0/0:-0,-13.85,-276	0/1:-36,-8.43,-131.5	0/1:-36,-16.26,-288	0/0:-0,-16.26,-323	0/0:-0.6,-13.85,-262.6	0/0:-0,-10.84,-214.8	0/1:-65.1,-12.04,-164	0/0:-0.6,-10.84,-203.9	0/1:-48,-10.84,-166.5	0/0:-0.6,-15.05,-285.3	0/0:-0,-10.24,-204	0/0:-0,-7.83,-155.3	0/0:-0,-6.02,-114	0/0:-1.2,-12.64,-229.2	0/0:-1.2,-10.24,-181.2	0/1:-33.3,-12.04,-203.4	0/0:-2.41,-11.44,-182.41	0/1:-43.7,-6.62,-84.01	0/0:-1.2,-9.03,-154.2	0/0:-0,-7.22,-144	0/1:-114,-17.46,-222.2	0/1:-66.4,-10.84,-143	0/1:-153.4,-21.07,-245.03	0/0:-0.66,-16.86,-316.2	0/0:-0,-8.43,-166	0/1:-48,-15.05,-249.2	0/0:-0,-13.85,-276	0/0:-0,-21.07,-408.6	0/0:-3.01,-15.05,-241.21	0/0:-0.6,-7.22,-132.2	0/1:-205.3,-22.28,-227.1	0/0:-1.2,-13.25,-241.2	0/1:-68.91,-9.03,-103.7	0/1:-99,-15.05,-190.3	0/0:-0,-10.24,-204	chr15	46277162	46277163	XR_811548.3	LOC104974257	-	76431
chr15	46200449	46200732	SVTYPE=Bov-A2;END=46200732;SVLEN=283;ADJLEFT=46200449;ADJRIGHT=46200732	0/1:-69.7,-19.27,-312	0/1:-50.3,-13.85,-209.4	0/0:-0,-7.83,-156	0/0:-0,-13.85,-276	0/1:-36,-8.43,-131.5	0/1:-36,-16.26,-288	0/0:-0,-16.26,-323	0/0:-0.6,-13.85,-262.6	0/0:-0,-10.84,-214.8	0/1:-65.1,-12.04,-164	0/0:-0.6,-10.84,-203.9	0/1:-48,-10.84,-166.5	0/0:-0.6,-15.05,-285.3	0/0:-0,-10.24,-204	0/0:-0,-7.83,-155.3	0/0:-0,-6.02,-114	0/0:-1.2,-12.64,-229.2	0/0:-1.2,-10.24,-181.2	0/1:-33.3,-12.04,-203.4	0/0:-2.41,-11.44,-182.41	0/1:-43.7,-6.62,-84.01	0/0:-1.2,-9.03,-154.2	0/0:-0,-7.22,-144	0/1:-114,-17.46,-222.2	0/1:-66.4,-10.84,-143	0/1:-153.4,-21.07,-245.03	0/0:-0.66,-16.86,-316.2	0/0:-0,-8.43,-166	0/1:-48,-15.05,-249.2	0/0:-0,-13.85,-276	0/0:-0,-21.07,-408.6	0/0:-3.01,-15.05,-241.21	0/0:-0.6,-7.22,-132.2	0/1:-205.3,-22.28,-227.1	0/0:-1.2,-13.25,-241.2	0/1:-68.91,-9.03,-103.7	0/1:-99,-15.05,-190.3	0/0:-0,-10.24,-204	chr15	46277369	46277370	NM_001075293.2	LOC506989	+	76638
chr15	46200449	46200732	SVTYPE=Bov-A2;END=46200732;SVLEN=283;ADJLEFT=46200449;ADJRIGHT=46200732	0/1:-69.7,-19.27,-312	0/1:-50.3,-13.85,-209.4	0/0:-0,-7.83,-156	0/0:-0,-13.85,-276	0/1:-36,-8.43,-131.5	0/1:-36,-16.26,-288	0/0:-0,-16.26,-323	0/0:-0.6,-13.85,-262.6	0/0:-0,-10.84,-214.8	0/1:-65.1,-12.04,-164	0/0:-0.6,-10.84,-203.9	0/1:-48,-10.84,-166.5	0/0:-0.6,-15.05,-285.3	0/0:-0,-10.24,-204	0/0:-0,-7.83,-155.3	0/0:-0,-6.02,-114	0/0:-1.2,-12.64,-229.2	0/0:-1.2,-10.24,-181.2	0/1:-33.3,-12.04,-203.4	0/0:-2.41,-11.44,-182.41	0/1:-43.7,-6.62,-84.01	0/0:-1.2,-9.03,-154.2	0/0:-0,-7.22,-144	0/1:-114,-17.46,-222.2	0/1:-66.4,-10.84,-143	0/1:-153.4,-21.07,-245.03	0/0:-0.66,-16.86,-316.2	0/0:-0,-8.43,-166	0/1:-48,-15.05,-249.2	0/0:-0,-13.85,-276	0/0:-0,-21.07,-408.6	0/0:-3.01,-15.05,-241.21	0/0:-0.6,-7.22,-132.2	0/1:-205.3,-22.28,-227.1	0/0:-1.2,-13.25,-241.2	0/1:-68.91,-9.03,-103.7	0/1:-99,-15.05,-190.3	0/0:-0,-10.24,-204	chr15	46107724	46107725	NM_001105049.1	LOC100125776	-	92725
chr15	46200449	46200732	SVTYPE=Bov-A2;END=46200732;SVLEN=283;ADJLEFT=46200449;ADJRIGHT=46200732	0/1:-69.7,-19.27,-312	0/1:-50.3,-13.85,-209.4	0/0:-0,-7.83,-156	0/0:-0,-13.85,-276	0/1:-36,-8.43,-131.5	0/1:-36,-16.26,-288	0/0:-0,-16.26,-323	0/0:-0.6,-13.85,-262.6	0/0:-0,-10.84,-214.8	0/1:-65.1,-12.04,-164	0/0:-0.6,-10.84,-203.9	0/1:-48,-10.84,-166.5	0/0:-0.6,-15.05,-285.3	0/0:-0,-10.24,-204	0/0:-0,-7.83,-155.3	0/0:-0,-6.02,-114	0/0:-1.2,-12.64,-229.2	0/0:-1.2,-10.24,-181.2	0/1:-33.3,-12.04,-203.4	0/0:-2.41,-11.44,-182.41	0/1:-43.7,-6.62,-84.01	0/0:-1.2,-9.03,-154.2	0/0:-0,-7.22,-144	0/1:-114,-17.46,-222.2	0/1:-66.4,-10.84,-143	0/1:-153.4,-21.07,-245.03	0/0:-0.66,-16.86,-316.2	0/0:-0,-8.43,-166	0/1:-48,-15.05,-249.2	0/0:-0,-13.85,-276	0/0:-0,-21.07,-408.6	0/0:-3.01,-15.05,-241.21	0/0:-0.6,-7.22,-132.2	0/1:-205.3,-22.28,-227.1	0/0:-1.2,-13.25,-241.2	0/1:-68.91,-9.03,-103.7	0/1:-99,-15.05,-190.3	0/0:-0,-10.24,-204	chr15	46101588	46101589	XR_003029476.1	LOC783299	-	98861
chr15	46200449	46200732	SVTYPE=Bov-A2;END=46200732;SVLEN=283;ADJLEFT=46200449;ADJRIGHT=46200732	0/1:-69.7,-19.27,-312	0/1:-50.3,-13.85,-209.4	0/0:-0,-7.83,-156	0/0:-0,-13.85,-276	0/1:-36,-8.43,-131.5	0/1:-36,-16.26,-288	0/0:-0,-16.26,-323	0/0:-0.6,-13.85,-262.6	0/0:-0,-10.84,-214.8	0/1:-65.1,-12.04,-164	0/0:-0.6,-10.84,-203.9	0/1:-48,-10.84,-166.5	0/0:-0.6,-15.05,-285.3	0/0:-0,-10.24,-204	0/0:-0,-7.83,-155.3	0/0:-0,-6.02,-114	0/0:-1.2,-12.64,-229.2	0/0:-1.2,-10.24,-181.2	0/1:-33.3,-12.04,-203.4	0/0:-2.41,-11.44,-182.41	0/1:-43.7,-6.62,-84.01	0/0:-1.2,-9.03,-154.2	0/0:-0,-7.22,-144	0/1:-114,-17.46,-222.2	0/1:-66.4,-10.84,-143	0/1:-153.4,-21.07,-245.03	0/0:-0.66,-16.86,-316.2	0/0:-0,-8.43,-166	0/1:-48,-15.05,-249.2	0/0:-0,-13.85,-276	0/0:-0,-21.07,-408.6	0/0:-3.01,-15.05,-241.21	0/0:-0.6,-7.22,-132.2	0/1:-205.3,-22.28,-227.1	0/0:-1.2,-13.25,-241.2	0/1:-68.91,-9.03,-103.7	0/1:-99,-15.05,-190.3	0/0:-0,-10.24,-204	chr15	46093817	46093818	XM_002693147.4	OR2AG2	-	106632
chr15	46200449	46200732	SVTYPE=Bov-A2;END=46200732;SVLEN=283;ADJLEFT=46200449;ADJRIGHT=46200732	0/1:-69.7,-19.27,-312	0/1:-50.3,-13.85,-209.4	0/0:-0,-7.83,-156	0/0:-0,-13.85,-276	0/1:-36,-8.43,-131.5	0/1:-36,-16.26,-288	0/0:-0,-16.26,-323	0/0:-0.6,-13.85,-262.6	0/0:-0,-10.84,-214.8	0/1:-65.1,-12.04,-164	0/0:-0.6,-10.84,-203.9	0/1:-48,-10.84,-166.5	0/0:-0.6,-15.05,-285.3	0/0:-0,-10.24,-204	0/0:-0,-7.83,-155.3	0/0:-0,-6.02,-114	0/0:-1.2,-12.64,-229.2	0/0:-1.2,-10.24,-181.2	0/1:-33.3,-12.04,-203.4	0/0:-2.41,-11.44,-182.41	0/1:-43.7,-6.62,-84.01	0/0:-1.2,-9.03,-154.2	0/0:-0,-7.22,-144	0/1:-114,-17.46,-222.2	0/1:-66.4,-10.84,-143	0/1:-153.4,-21.07,-245.03	0/0:-0.66,-16.86,-316.2	0/0:-0,-8.43,-166	0/1:-48,-15.05,-249.2	0/0:-0,-13.85,-276	0/0:-0,-21.07,-408.6	0/0:-3.01,-15.05,-241.21	0/0:-0.6,-7.22,-132.2	0/1:-205.3,-22.28,-227.1	0/0:-1.2,-13.25,-241.2	0/1:-68.91,-9.03,-103.7	0/1:-99,-15.05,-190.3	0/0:-0,-10.24,-204	chr15	46322325	46322326	XM_015474717.2	LOC783920	+	121594
chr15	46200449	46200732	SVTYPE=Bov-A2;END=46200732;SVLEN=283;ADJLEFT=46200449;ADJRIGHT=46200732	0/1:-69.7,-19.27,-312	0/1:-50.3,-13.85,-209.4	0/0:-0,-7.83,-156	0/0:-0,-13.85,-276	0/1:-36,-8.43,-131.5	0/1:-36,-16.26,-288	0/0:-0,-16.26,-323	0/0:-0.6,-13.85,-262.6	0/0:-0,-10.84,-214.8	0/1:-65.1,-12.04,-164	0/0:-0.6,-10.84,-203.9	0/1:-48,-10.84,-166.5	0/0:-0.6,-15.05,-285.3	0/0:-0,-10.24,-204	0/0:-0,-7.83,-155.3	0/0:-0,-6.02,-114	0/0:-1.2,-12.64,-229.2	0/0:-1.2,-10.24,-181.2	0/1:-33.3,-12.04,-203.4	0/0:-2.41,-11.44,-182.41	0/1:-43.7,-6.62,-84.01	0/0:-1.2,-9.03,-154.2	0/0:-0,-7.22,-144	0/1:-114,-17.46,-222.2	0/1:-66.4,-10.84,-143	0/1:-153.4,-21.07,-245.03	0/0:-0.66,-16.86,-316.2	0/0:-0,-8.43,-166	0/1:-48,-15.05,-249.2	0/0:-0,-13.85,-276	0/0:-0,-21.07,-408.6	0/0:-3.01,-15.05,-241.21	0/0:-0.6,-7.22,-132.2	0/1:-205.3,-22.28,-227.1	0/0:-1.2,-13.25,-241.2	0/1:-68.91,-9.03,-103.7	0/1:-99,-15.05,-190.3	0/0:-0,-10.24,-204	chr15	46071990	46071991	XM_024975837.1	LOC112441631	-	128459
chr15	46200449	46200732	SVTYPE=Bov-A2;END=46200732;SVLEN=283;ADJLEFT=46200449;ADJRIGHT=46200732	0/1:-69.7,-19.27,-312	0/1:-50.3,-13.85,-209.4	0/0:-0,-7.83,-156	0/0:-0,-13.85,-276	0/1:-36,-8.43,-131.5	0/1:-36,-16.26,-288	0/0:-0,-16.26,-323	0/0:-0.6,-13.85,-262.6	0/0:-0,-10.84,-214.8	0/1:-65.1,-12.04,-164	0/0:-0.6,-10.84,-203.9	0/1:-48,-10.84,-166.5	0/0:-0.6,-15.05,-285.3	0/0:-0,-10.24,-204	0/0:-0,-7.83,-155.3	0/0:-0,-6.02,-114	0/0:-1.2,-12.64,-229.2	0/0:-1.2,-10.24,-181.2	0/1:-33.3,-12.04,-203.4	0/0:-2.41,-11.44,-182.41	0/1:-43.7,-6.62,-84.01	0/0:-1.2,-9.03,-154.2	0/0:-0,-7.22,-144	0/1:-114,-17.46,-222.2	0/1:-66.4,-10.84,-143	0/1:-153.4,-21.07,-245.03	0/0:-0.66,-16.86,-316.2	0/0:-0,-8.43,-166	0/1:-48,-15.05,-249.2	0/0:-0,-13.85,-276	0/0:-0,-21.07,-408.6	0/0:-3.01,-15.05,-241.21	0/0:-0.6,-7.22,-132.2	0/1:-205.3,-22.28,-227.1	0/0:-1.2,-13.25,-241.2	0/1:-68.91,-9.03,-103.7	0/1:-99,-15.05,-190.3	0/0:-0,-10.24,-204	chr15	46053126	46053127	XM_002693148.2	OR2AG1	-	147323
chr15	46200449	46200732	SVTYPE=Bov-A2;END=46200732;SVLEN=283;ADJLEFT=46200449;ADJRIGHT=46200732	0/1:-69.7,-19.27,-312	0/1:-50.3,-13.85,-209.4	0/0:-0,-7.83,-156	0/0:-0,-13.85,-276	0/1:-36,-8.43,-131.5	0/1:-36,-16.26,-288	0/0:-0,-16.26,-323	0/0:-0.6,-13.85,-262.6	0/0:-0,-10.84,-214.8	0/1:-65.1,-12.04,-164	0/0:-0.6,-10.84,-203.9	0/1:-48,-10.84,-166.5	0/0:-0.6,-15.05,-285.3	0/0:-0,-10.24,-204	0/0:-0,-7.83,-155.3	0/0:-0,-6.02,-114	0/0:-1.2,-12.64,-229.2	0/0:-1.2,-10.24,-181.2	0/1:-33.3,-12.04,-203.4	0/0:-2.41,-11.44,-182.41	0/1:-43.7,-6.62,-84.01	0/0:-1.2,-9.03,-154.2	0/0:-0,-7.22,-144	0/1:-114,-17.46,-222.2	0/1:-66.4,-10.84,-143	0/1:-153.4,-21.07,-245.03	0/0:-0.66,-16.86,-316.2	0/0:-0,-8.43,-166	0/1:-48,-15.05,-249.2	0/0:-0,-13.85,-276	0/0:-0,-21.07,-408.6	0/0:-3.01,-15.05,-241.21	0/0:-0.6,-7.22,-132.2	0/1:-205.3,-22.28,-227.1	0/0:-1.2,-13.25,-241.2	0/1:-68.91,-9.03,-103.7	0/1:-99,-15.05,-190.3	0/0:-0,-10.24,-204	chr15	46029872	46029873	XR_003029560.1	LOC112441699	+	170577
chr15	46200449	46200732	SVTYPE=Bov-A2;END=46200732;SVLEN=283;ADJLEFT=46200449;ADJRIGHT=46200732	0/1:-69.7,-19.27,-312	0/1:-50.3,-13.85,-209.4	0/0:-0,-7.83,-156	0/0:-0,-13.85,-276	0/1:-36,-8.43,-131.5	0/1:-36,-16.26,-288	0/0:-0,-16.26,-323	0/0:-0.6,-13.85,-262.6	0/0:-0,-10.84,-214.8	0/1:-65.1,-12.04,-164	0/0:-0.6,-10.84,-203.9	0/1:-48,-10.84,-166.5	0/0:-0.6,-15.05,-285.3	0/0:-0,-10.24,-204	0/0:-0,-7.83,-155.3	0/0:-0,-6.02,-114	0/0:-1.2,-12.64,-229.2	0/0:-1.2,-10.24,-181.2	0/1:-33.3,-12.04,-203.4	0/0:-2.41,-11.44,-182.41	0/1:-43.7,-6.62,-84.01	0/0:-1.2,-9.03,-154.2	0/0:-0,-7.22,-144	0/1:-114,-17.46,-222.2	0/1:-66.4,-10.84,-143	0/1:-153.4,-21.07,-245.03	0/0:-0.66,-16.86,-316.2	0/0:-0,-8.43,-166	0/1:-48,-15.05,-249.2	0/0:-0,-13.85,-276	0/0:-0,-21.07,-408.6	0/0:-3.01,-15.05,-241.21	0/0:-0.6,-7.22,-132.2	0/1:-205.3,-22.28,-227.1	0/0:-1.2,-13.25,-241.2	0/1:-68.91,-9.03,-103.7	0/1:-99,-15.05,-190.3	0/0:-0,-10.24,-204	chr15	46025556	46025557	XM_010812593.2	LOC100336980	-	174893
chr15	46200449	46200732	SVTYPE=Bov-A2;END=46200732;SVLEN=283;ADJLEFT=46200449;ADJRIGHT=46200732	0/1:-69.7,-19.27,-312	0/1:-50.3,-13.85,-209.4	0/0:-0,-7.83,-156	0/0:-0,-13.85,-276	0/1:-36,-8.43,-131.5	0/1:-36,-16.26,-288	0/0:-0,-16.26,-323	0/0:-0.6,-13.85,-262.6	0/0:-0,-10.84,-214.8	0/1:-65.1,-12.04,-164	0/0:-0.6,-10.84,-203.9	0/1:-48,-10.84,-166.5	0/0:-0.6,-15.05,-285.3	0/0:-0,-10.24,-204	0/0:-0,-7.83,-155.3	0/0:-0,-6.02,-114	0/0:-1.2,-12.64,-229.2	0/0:-1.2,-10.24,-181.2	0/1:-33.3,-12.04,-203.4	0/0:-2.41,-11.44,-182.41	0/1:-43.7,-6.62,-84.01	0/0:-1.2,-9.03,-154.2	0/0:-0,-7.22,-144	0/1:-114,-17.46,-222.2	0/1:-66.4,-10.84,-143	0/1:-153.4,-21.07,-245.03	0/0:-0.66,-16.86,-316.2	0/0:-0,-8.43,-166	0/1:-48,-15.05,-249.2	0/0:-0,-13.85,-276	0/0:-0,-21.07,-408.6	0/0:-3.01,-15.05,-241.21	0/0:-0.6,-7.22,-132.2	0/1:-205.3,-22.28,-227.1	0/0:-1.2,-13.25,-241.2	0/1:-68.91,-9.03,-103.7	0/1:-99,-15.05,-190.3	0/0:-0,-10.24,-204	chr15	46383607	46383608	NM_001034274.2	MRPL17	+	182876
chr15	46200449	46200732	SVTYPE=Bov-A2;END=46200732;SVLEN=283;ADJLEFT=46200449;ADJRIGHT=46200732	0/1:-69.7,-19.27,-312	0/1:-50.3,-13.85,-209.4	0/0:-0,-7.83,-156	0/0:-0,-13.85,-276	0/1:-36,-8.43,-131.5	0/1:-36,-16.26,-288	0/0:-0,-16.26,-323	0/0:-0.6,-13.85,-262.6	0/0:-0,-10.84,-214.8	0/1:-65.1,-12.04,-164	0/0:-0.6,-10.84,-203.9	0/1:-48,-10.84,-166.5	0/0:-0.6,-15.05,-285.3	0/0:-0,-10.24,-204	0/0:-0,-7.83,-155.3	0/0:-0,-6.02,-114	0/0:-1.2,-12.64,-229.2	0/0:-1.2,-10.24,-181.2	0/1:-33.3,-12.04,-203.4	0/0:-2.41,-11.44,-182.41	0/1:-43.7,-6.62,-84.01	0/0:-1.2,-9.03,-154.2	0/0:-0,-7.22,-144	0/1:-114,-17.46,-222.2	0/1:-66.4,-10.84,-143	0/1:-153.4,-21.07,-245.03	0/0:-0.66,-16.86,-316.2	0/0:-0,-8.43,-166	0/1:-48,-15.05,-249.2	0/0:-0,-13.85,-276	0/0:-0,-21.07,-408.6	0/0:-3.01,-15.05,-241.21	0/0:-0.6,-7.22,-132.2	0/1:-205.3,-22.28,-227.1	0/0:-1.2,-13.25,-241.2	0/1:-68.91,-9.03,-103.7	0/1:-99,-15.05,-190.3	0/0:-0,-10.24,-204	chr15	46014079	46014080	XM_002693167.4	LOC511622	+	186370
chr15	46200449	46200732	SVTYPE=Bov-A2;END=46200732;SVLEN=283;ADJLEFT=46200449;ADJRIGHT=46200732	0/1:-69.7,-19.27,-312	0/1:-50.3,-13.85,-209.4	0/0:-0,-7.83,-156	0/0:-0,-13.85,-276	0/1:-36,-8.43,-131.5	0/1:-36,-16.26,-288	0/0:-0,-16.26,-323	0/0:-0.6,-13.85,-262.6	0/0:-0,-10.84,-214.8	0/1:-65.1,-12.04,-164	0/0:-0.6,-10.84,-203.9	0/1:-48,-10.84,-166.5	0/0:-0.6,-15.05,-285.3	0/0:-0,-10.24,-204	0/0:-0,-7.83,-155.3	0/0:-0,-6.02,-114	0/0:-1.2,-12.64,-229.2	0/0:-1.2,-10.24,-181.2	0/1:-33.3,-12.04,-203.4	0/0:-2.41,-11.44,-182.41	0/1:-43.7,-6.62,-84.01	0/0:-1.2,-9.03,-154.2	0/0:-0,-7.22,-144	0/1:-114,-17.46,-222.2	0/1:-66.4,-10.84,-143	0/1:-153.4,-21.07,-245.03	0/0:-0.66,-16.86,-316.2	0/0:-0,-8.43,-166	0/1:-48,-15.05,-249.2	0/0:-0,-13.85,-276	0/0:-0,-21.07,-408.6	0/0:-3.01,-15.05,-241.21	0/0:-0.6,-7.22,-132.2	0/1:-205.3,-22.28,-227.1	0/0:-1.2,-13.25,-241.2	0/1:-68.91,-9.03,-103.7	0/1:-99,-15.05,-190.3	0/0:-0,-10.24,-204	chr15	46407492	46407493	XM_002693149.5	DCHS1	+	206761
chr15	46200449	46200732	SVTYPE=Bov-A2;END=46200732;SVLEN=283;ADJLEFT=46200449;ADJRIGHT=46200732	0/1:-69.7,-19.27,-312	0/1:-50.3,-13.85,-209.4	0/0:-0,-7.83,-156	0/0:-0,-13.85,-276	0/1:-36,-8.43,-131.5	0/1:-36,-16.26,-288	0/0:-0,-16.26,-323	0/0:-0.6,-13.85,-262.6	0/0:-0,-10.84,-214.8	0/1:-65.1,-12.04,-164	0/0:-0.6,-10.84,-203.9	0/1:-48,-10.84,-166.5	0/0:-0.6,-15.05,-285.3	0/0:-0,-10.24,-204	0/0:-0,-7.83,-155.3	0/0:-0,-6.02,-114	0/0:-1.2,-12.64,-229.2	0/0:-1.2,-10.24,-181.2	0/1:-33.3,-12.04,-203.4	0/0:-2.41,-11.44,-182.41	0/1:-43.7,-6.62,-84.01	0/0:-1.2,-9.03,-154.2	0/0:-0,-7.22,-144	0/1:-114,-17.46,-222.2	0/1:-66.4,-10.84,-143	0/1:-153.4,-21.07,-245.03	0/0:-0.66,-16.86,-316.2	0/0:-0,-8.43,-166	0/1:-48,-15.05,-249.2	0/0:-0,-13.85,-276	0/0:-0,-21.07,-408.6	0/0:-3.01,-15.05,-241.21	0/0:-0.6,-7.22,-132.2	0/1:-205.3,-22.28,-227.1	0/0:-1.2,-13.25,-241.2	0/1:-68.91,-9.03,-103.7	0/1:-99,-15.05,-190.3	0/0:-0,-10.24,-204	chr15	45990809	45990810	XM_002693144.4	LOC100336956	+	209640
chr15	46200449	46200732	SVTYPE=Bov-A2;END=46200732;SVLEN=283;ADJLEFT=46200449;ADJRIGHT=46200732	0/1:-69.7,-19.27,-312	0/1:-50.3,-13.85,-209.4	0/0:-0,-7.83,-156	0/0:-0,-13.85,-276	0/1:-36,-8.43,-131.5	0/1:-36,-16.26,-288	0/0:-0,-16.26,-323	0/0:-0.6,-13.85,-262.6	0/0:-0,-10.84,-214.8	0/1:-65.1,-12.04,-164	0/0:-0.6,-10.84,-203.9	0/1:-48,-10.84,-166.5	0/0:-0.6,-15.05,-285.3	0/0:-0,-10.24,-204	0/0:-0,-7.83,-155.3	0/0:-0,-6.02,-114	0/0:-1.2,-12.64,-229.2	0/0:-1.2,-10.24,-181.2	0/1:-33.3,-12.04,-203.4	0/0:-2.41,-11.44,-182.41	0/1:-43.7,-6.62,-84.01	0/0:-1.2,-9.03,-154.2	0/0:-0,-7.22,-144	0/1:-114,-17.46,-222.2	0/1:-66.4,-10.84,-143	0/1:-153.4,-21.07,-245.03	0/0:-0.66,-16.86,-316.2	0/0:-0,-8.43,-166	0/1:-48,-15.05,-249.2	0/0:-0,-13.85,-276	0/0:-0,-21.07,-408.6	0/0:-3.01,-15.05,-241.21	0/0:-0.6,-7.22,-132.2	0/1:-205.3,-22.28,-227.1	0/0:-1.2,-13.25,-241.2	0/1:-68.91,-9.03,-103.7	0/1:-99,-15.05,-190.3	0/0:-0,-10.24,-204	chr15	45981879	45981880	NM_001206767.1	LOC530354	+	218570
chr15	46200449	46200732	SVTYPE=Bov-A2;END=46200732;SVLEN=283;ADJLEFT=46200449;ADJRIGHT=46200732	0/1:-69.7,-19.27,-312	0/1:-50.3,-13.85,-209.4	0/0:-0,-7.83,-156	0/0:-0,-13.85,-276	0/1:-36,-8.43,-131.5	0/1:-36,-16.26,-288	0/0:-0,-16.26,-323	0/0:-0.6,-13.85,-262.6	0/0:-0,-10.84,-214.8	0/1:-65.1,-12.04,-164	0/0:-0.6,-10.84,-203.9	0/1:-48,-10.84,-166.5	0/0:-0.6,-15.05,-285.3	0/0:-0,-10.24,-204	0/0:-0,-7.83,-155.3	0/0:-0,-6.02,-114	0/0:-1.2,-12.64,-229.2	0/0:-1.2,-10.24,-181.2	0/1:-33.3,-12.04,-203.4	0/0:-2.41,-11.44,-182.41	0/1:-43.7,-6.62,-84.01	0/0:-1.2,-9.03,-154.2	0/0:-0,-7.22,-144	0/1:-114,-17.46,-222.2	0/1:-66.4,-10.84,-143	0/1:-153.4,-21.07,-245.03	0/0:-0.66,-16.86,-316.2	0/0:-0,-8.43,-166	0/1:-48,-15.05,-249.2	0/0:-0,-13.85,-276	0/0:-0,-21.07,-408.6	0/0:-3.01,-15.05,-241.21	0/0:-0.6,-7.22,-132.2	0/1:-205.3,-22.28,-227.1	0/0:-1.2,-13.25,-241.2	0/1:-68.91,-9.03,-103.7	0/1:-99,-15.05,-190.3	0/0:-0,-10.24,-204	chr15	45960176	45960177	XM_005216132.4	LOC516636	+	240273
chr15	46200449	46200732	SVTYPE=Bov-A2;END=46200732;SVLEN=283;ADJLEFT=46200449;ADJRIGHT=46200732	0/1:-69.7,-19.27,-312	0/1:-50.3,-13.85,-209.4	0/0:-0,-7.83,-156	0/0:-0,-13.85,-276	0/1:-36,-8.43,-131.5	0/1:-36,-16.26,-288	0/0:-0,-16.26,-323	0/0:-0.6,-13.85,-262.6	0/0:-0,-10.84,-214.8	0/1:-65.1,-12.04,-164	0/0:-0.6,-10.84,-203.9	0/1:-48,-10.84,-166.5	0/0:-0.6,-15.05,-285.3	0/0:-0,-10.24,-204	0/0:-0,-7.83,-155.3	0/0:-0,-6.02,-114	0/0:-1.2,-12.64,-229.2	0/0:-1.2,-10.24,-181.2	0/1:-33.3,-12.04,-203.4	0/0:-2.41,-11.44,-182.41	0/1:-43.7,-6.62,-84.01	0/0:-1.2,-9.03,-154.2	0/0:-0,-7.22,-144	0/1:-114,-17.46,-222.2	0/1:-66.4,-10.84,-143	0/1:-153.4,-21.07,-245.03	0/0:-0.66,-16.86,-316.2	0/0:-0,-8.43,-166	0/1:-48,-15.05,-249.2	0/0:-0,-13.85,-276	0/0:-0,-21.07,-408.6	0/0:-3.01,-15.05,-241.21	0/0:-0.6,-7.22,-132.2	0/1:-205.3,-22.28,-227.1	0/0:-1.2,-13.25,-241.2	0/1:-68.91,-9.03,-103.7	0/1:-99,-15.05,-190.3	0/0:-0,-10.24,-204	chr15	46444947	46444948	NM_001075718.1	TPP1	+	244216
chr23	28053581	28053859	SVTYPE=Bov-A2;END=28053859;SVLEN=278;ADJLEFT=28053581;ADJRIGHT=28053859	0/0:-0,-10.24,-204	0/0:-0,-12.04,-237.9	0/0:-0,-12.04,-239.3	0/0:-1.21,-7.22,-111	0/1:-32,-7.22,-108	0/1:-48,-8.43,-120	0/0:-0,-14.45,-284.5	0/0:-1.2,-18.06,-326.9	0/0:-0,-15.65,-309.7	0/0:-0,-10.84,-205.8	0/0:-0,-15.65,-311.9	0/1:-48,-3.01,-12	0/0:-0,-12.64,-239.7	0/0:-1.2,-8.43,-145.2	0/0:-0.6,-3.01,-48.6	0/0:-1.81,-2.41,-13.81	0/1:-32.61,-10.24,-156.7	0/0:-0,-10.24,-204	0/1:-94,-14.45,-190	0/1:-42.8,-13.25,-216	0/0:-0,-10.84,-216	0/0:-0.6,-1.2,-12.6	0/1:-29.6,-13.85,-239.65	0/0:-1.2,-4.21,-59.2	0/0:-0.6,-1.81,-24.6	0/0:-0,-14.45,-281.3	0/0:-0,-8.43,-168	0/0:-0,-7.83,-156	0/1:-45.7,-13.25,-216	0/1:-82,-15.65,-223.8	0/1:-36,-3.61,-35.3	0/1:-95.6,-8.43,-70	0/1:-48.08,-15.65,-253	0/0:-1.81,-13.25,-229.81	0/1:-36,-14.45,-248.4	0/1:-60,-6.62,-68	0/1:-36,-7.22,-107.4	0/0:-1.2,-7.22,-121.2	chr23	28055155	28055156	NM_001206459.1	LOC616942	+	1297
chr23	28053581	28053859	SVTYPE=Bov-A2;END=28053859;SVLEN=278;ADJLEFT=28053581;ADJRIGHT=28053859	0/0:-0,-10.24,-204	0/0:-0,-12.04,-237.9	0/0:-0,-12.04,-239.3	0/0:-1.21,-7.22,-111	0/1:-32,-7.22,-108	0/1:-48,-8.43,-120	0/0:-0,-14.45,-284.5	0/0:-1.2,-18.06,-326.9	0/0:-0,-15.65,-309.7	0/0:-0,-10.84,-205.8	0/0:-0,-15.65,-311.9	0/1:-48,-3.01,-12	0/0:-0,-12.64,-239.7	0/0:-1.2,-8.43,-145.2	0/0:-0.6,-3.01,-48.6	0/0:-1.81,-2.41,-13.81	0/1:-32.61,-10.24,-156.7	0/0:-0,-10.24,-204	0/1:-94,-14.45,-190	0/1:-42.8,-13.25,-216	0/0:-0,-10.84,-216	0/0:-0.6,-1.2,-12.6	0/1:-29.6,-13.85,-239.65	0/0:-1.2,-4.21,-59.2	0/0:-0.6,-1.81,-24.6	0/0:-0,-14.45,-281.3	0/0:-0,-8.43,-168	0/0:-0,-7.83,-156	0/1:-45.7,-13.25,-216	0/1:-82,-15.65,-223.8	0/1:-36,-3.61,-35.3	0/1:-95.6,-8.43,-70	0/1:-48.08,-15.65,-253	0/0:-1.81,-13.25,-229.81	0/1:-36,-14.45,-248.4	0/1:-60,-6.62,-68	0/1:-36,-7.22,-107.4	0/0:-1.2,-7.22,-121.2	chr23	28050215	28050216	XR_003032313.1	LOC112443912	-	3366
chr23	28053581	28053859	SVTYPE=Bov-A2;END=28053859;SVLEN=278;ADJLEFT=28053581;ADJRIGHT=28053859	0/0:-0,-10.24,-204	0/0:-0,-12.04,-237.9	0/0:-0,-12.04,-239.3	0/0:-1.21,-7.22,-111	0/1:-32,-7.22,-108	0/1:-48,-8.43,-120	0/0:-0,-14.45,-284.5	0/0:-1.2,-18.06,-326.9	0/0:-0,-15.65,-309.7	0/0:-0,-10.84,-205.8	0/0:-0,-15.65,-311.9	0/1:-48,-3.01,-12	0/0:-0,-12.64,-239.7	0/0:-1.2,-8.43,-145.2	0/0:-0.6,-3.01,-48.6	0/0:-1.81,-2.41,-13.81	0/1:-32.61,-10.24,-156.7	0/0:-0,-10.24,-204	0/1:-94,-14.45,-190	0/1:-42.8,-13.25,-216	0/0:-0,-10.84,-216	0/0:-0.6,-1.2,-12.6	0/1:-29.6,-13.85,-239.65	0/0:-1.2,-4.21,-59.2	0/0:-0.6,-1.81,-24.6	0/0:-0,-14.45,-281.3	0/0:-0,-8.43,-168	0/0:-0,-7.83,-156	0/1:-45.7,-13.25,-216	0/1:-82,-15.65,-223.8	0/1:-36,-3.61,-35.3	0/1:-95.6,-8.43,-70	0/1:-48.08,-15.65,-253	0/0:-1.81,-13.25,-229.81	0/1:-36,-14.45,-248.4	0/1:-60,-6.62,-68	0/1:-36,-7.22,-107.4	0/0:-1.2,-7.22,-121.2	chr23	28028362	28028363	XM_010818385.3	C23H6orf15	+	25219
chr23	28053581	28053859	SVTYPE=Bov-A2;END=28053859;SVLEN=278;ADJLEFT=28053581;ADJRIGHT=28053859	0/0:-0,-10.24,-204	0/0:-0,-12.04,-237.9	0/0:-0,-12.04,-239.3	0/0:-1.21,-7.22,-111	0/1:-32,-7.22,-108	0/1:-48,-8.43,-120	0/0:-0,-14.45,-284.5	0/0:-1.2,-18.06,-326.9	0/0:-0,-15.65,-309.7	0/0:-0,-10.84,-205.8	0/0:-0,-15.65,-311.9	0/1:-48,-3.01,-12	0/0:-0,-12.64,-239.7	0/0:-1.2,-8.43,-145.2	0/0:-0.6,-3.01,-48.6	0/0:-1.81,-2.41,-13.81	0/1:-32.61,-10.24,-156.7	0/0:-0,-10.24,-204	0/1:-94,-14.45,-190	0/1:-42.8,-13.25,-216	0/0:-0,-10.84,-216	0/0:-0.6,-1.2,-12.6	0/1:-29.6,-13.85,-239.65	0/0:-1.2,-4.21,-59.2	0/0:-0.6,-1.81,-24.6	0/0:-0,-14.45,-281.3	0/0:-0,-8.43,-168	0/0:-0,-7.83,-156	0/1:-45.7,-13.25,-216	0/1:-82,-15.65,-223.8	0/1:-36,-3.61,-35.3	0/1:-95.6,-8.43,-70	0/1:-48.08,-15.65,-253	0/0:-1.81,-13.25,-229.81	0/1:-36,-14.45,-248.4	0/1:-60,-6.62,-68	0/1:-36,-7.22,-107.4	0/0:-1.2,-7.22,-121.2	chr23	28021400	28021401	NM_001077950.1	CDSN	+	32181
chr23	28053581	28053859	SVTYPE=Bov-A2;END=28053859;SVLEN=278;ADJLEFT=28053581;ADJRIGHT=28053859	0/0:-0,-10.24,-204	0/0:-0,-12.04,-237.9	0/0:-0,-12.04,-239.3	0/0:-1.21,-7.22,-111	0/1:-32,-7.22,-108	0/1:-48,-8.43,-120	0/0:-0,-14.45,-284.5	0/0:-1.2,-18.06,-326.9	0/0:-0,-15.65,-309.7	0/0:-0,-10.84,-205.8	0/0:-0,-15.65,-311.9	0/1:-48,-3.01,-12	0/0:-0,-12.64,-239.7	0/0:-1.2,-8.43,-145.2	0/0:-0.6,-3.01,-48.6	0/0:-1.81,-2.41,-13.81	0/1:-32.61,-10.24,-156.7	0/0:-0,-10.24,-204	0/1:-94,-14.45,-190	0/1:-42.8,-13.25,-216	0/0:-0,-10.84,-216	0/0:-0.6,-1.2,-12.6	0/1:-29.6,-13.85,-239.65	0/0:-1.2,-4.21,-59.2	0/0:-0.6,-1.81,-24.6	0/0:-0,-14.45,-281.3	0/0:-0,-8.43,-168	0/0:-0,-7.83,-156	0/1:-45.7,-13.25,-216	0/1:-82,-15.65,-223.8	0/1:-36,-3.61,-35.3	0/1:-95.6,-8.43,-70	0/1:-48.08,-15.65,-253	0/0:-1.81,-13.25,-229.81	0/1:-36,-14.45,-248.4	0/1:-60,-6.62,-68	0/1:-36,-7.22,-107.4	0/0:-1.2,-7.22,-121.2	chr23	28095627	28095628	XR_814851.1	LOC100847761	-	41769
chr23	28053581	28053859	SVTYPE=Bov-A2;END=28053859;SVLEN=278;ADJLEFT=28053581;ADJRIGHT=28053859	0/0:-0,-10.24,-204	0/0:-0,-12.04,-237.9	0/0:-0,-12.04,-239.3	0/0:-1.21,-7.22,-111	0/1:-32,-7.22,-108	0/1:-48,-8.43,-120	0/0:-0,-14.45,-284.5	0/0:-1.2,-18.06,-326.9	0/0:-0,-15.65,-309.7	0/0:-0,-10.84,-205.8	0/0:-0,-15.65,-311.9	0/1:-48,-3.01,-12	0/0:-0,-12.64,-239.7	0/0:-1.2,-8.43,-145.2	0/0:-0.6,-3.01,-48.6	0/0:-1.81,-2.41,-13.81	0/1:-32.61,-10.24,-156.7	0/0:-0,-10.24,-204	0/1:-94,-14.45,-190	0/1:-42.8,-13.25,-216	0/0:-0,-10.84,-216	0/0:-0.6,-1.2,-12.6	0/1:-29.6,-13.85,-239.65	0/0:-1.2,-4.21,-59.2	0/0:-0.6,-1.81,-24.6	0/0:-0,-14.45,-281.3	0/0:-0,-8.43,-168	0/0:-0,-7.83,-156	0/1:-45.7,-13.25,-216	0/1:-82,-15.65,-223.8	0/1:-36,-3.61,-35.3	0/1:-95.6,-8.43,-70	0/1:-48.08,-15.65,-253	0/0:-1.81,-13.25,-229.81	0/1:-36,-14.45,-248.4	0/1:-60,-6.62,-68	0/1:-36,-7.22,-107.4	0/0:-1.2,-7.22,-121.2	chr23	28006178	28006179	NM_001080374.1	PSORS1C2	+	47403
chr23	28053581	28053859	SVTYPE=Bov-A2;END=28053859;SVLEN=278;ADJLEFT=28053581;ADJRIGHT=28053859	0/0:-0,-10.24,-204	0/0:-0,-12.04,-237.9	0/0:-0,-12.04,-239.3	0/0:-1.21,-7.22,-111	0/1:-32,-7.22,-108	0/1:-48,-8.43,-120	0/0:-0,-14.45,-284.5	0/0:-1.2,-18.06,-326.9	0/0:-0,-15.65,-309.7	0/0:-0,-10.84,-205.8	0/0:-0,-15.65,-311.9	0/1:-48,-3.01,-12	0/0:-0,-12.64,-239.7	0/0:-1.2,-8.43,-145.2	0/0:-0.6,-3.01,-48.6	0/0:-1.81,-2.41,-13.81	0/1:-32.61,-10.24,-156.7	0/0:-0,-10.24,-204	0/1:-94,-14.45,-190	0/1:-42.8,-13.25,-216	0/0:-0,-10.84,-216	0/0:-0.6,-1.2,-12.6	0/1:-29.6,-13.85,-239.65	0/0:-1.2,-4.21,-59.2	0/0:-0.6,-1.81,-24.6	0/0:-0,-14.45,-281.3	0/0:-0,-8.43,-168	0/0:-0,-7.83,-156	0/1:-45.7,-13.25,-216	0/1:-82,-15.65,-223.8	0/1:-36,-3.61,-35.3	0/1:-95.6,-8.43,-70	0/1:-48.08,-15.65,-253	0/0:-1.81,-13.25,-229.81	0/1:-36,-14.45,-248.4	0/1:-60,-6.62,-68	0/1:-36,-7.22,-107.4	0/0:-1.2,-7.22,-121.2	chr23	28109718	28109719	XM_002697352.6	MUC21	-	55860
chr23	28053581	28053859	SVTYPE=Bov-A2;END=28053859;SVLEN=278;ADJLEFT=28053581;ADJRIGHT=28053859	0/0:-0,-10.24,-204	0/0:-0,-12.04,-237.9	0/0:-0,-12.04,-239.3	0/0:-1.21,-7.22,-111	0/1:-32,-7.22,-108	0/1:-48,-8.43,-120	0/0:-0,-14.45,-284.5	0/0:-1.2,-18.06,-326.9	0/0:-0,-15.65,-309.7	0/0:-0,-10.84,-205.8	0/0:-0,-15.65,-311.9	0/1:-48,-3.01,-12	0/0:-0,-12.64,-239.7	0/0:-1.2,-8.43,-145.2	0/0:-0.6,-3.01,-48.6	0/0:-1.81,-2.41,-13.81	0/1:-32.61,-10.24,-156.7	0/0:-0,-10.24,-204	0/1:-94,-14.45,-190	0/1:-42.8,-13.25,-216	0/0:-0,-10.84,-216	0/0:-0.6,-1.2,-12.6	0/1:-29.6,-13.85,-239.65	0/0:-1.2,-4.21,-59.2	0/0:-0.6,-1.81,-24.6	0/0:-0,-14.45,-281.3	0/0:-0,-8.43,-168	0/0:-0,-7.83,-156	0/1:-45.7,-13.25,-216	0/1:-82,-15.65,-223.8	0/1:-36,-3.61,-35.3	0/1:-95.6,-8.43,-70	0/1:-48.08,-15.65,-253	0/0:-1.81,-13.25,-229.81	0/1:-36,-14.45,-248.4	0/1:-60,-6.62,-68	0/1:-36,-7.22,-107.4	0/0:-1.2,-7.22,-121.2	chr23	27992649	27992650	XM_005223643.4	CCHCR1	+	60932
chr23	28053581	28053859	SVTYPE=Bov-A2;END=28053859;SVLEN=278;ADJLEFT=28053581;ADJRIGHT=28053859	0/0:-0,-10.24,-204	0/0:-0,-12.04,-237.9	0/0:-0,-12.04,-239.3	0/0:-1.21,-7.22,-111	0/1:-32,-7.22,-108	0/1:-48,-8.43,-120	0/0:-0,-14.45,-284.5	0/0:-1.2,-18.06,-326.9	0/0:-0,-15.65,-309.7	0/0:-0,-10.84,-205.8	0/0:-0,-15.65,-311.9	0/1:-48,-3.01,-12	0/0:-0,-12.64,-239.7	0/0:-1.2,-8.43,-145.2	0/0:-0.6,-3.01,-48.6	0/0:-1.81,-2.41,-13.81	0/1:-32.61,-10.24,-156.7	0/0:-0,-10.24,-204	0/1:-94,-14.45,-190	0/1:-42.8,-13.25,-216	0/0:-0,-10.84,-216	0/0:-0.6,-1.2,-12.6	0/1:-29.6,-13.85,-239.65	0/0:-1.2,-4.21,-59.2	0/0:-0.6,-1.81,-24.6	0/0:-0,-14.45,-281.3	0/0:-0,-8.43,-168	0/0:-0,-7.83,-156	0/1:-45.7,-13.25,-216	0/1:-82,-15.65,-223.8	0/1:-36,-3.61,-35.3	0/1:-95.6,-8.43,-70	0/1:-48.08,-15.65,-253	0/0:-1.81,-13.25,-229.81	0/1:-36,-14.45,-248.4	0/1:-60,-6.62,-68	0/1:-36,-7.22,-107.4	0/0:-1.2,-7.22,-121.2	chr23	27992322	27992323	NM_001083684.1	TCF19	-	61259
chr23	28053581	28053859	SVTYPE=Bov-A2;END=28053859;SVLEN=278;ADJLEFT=28053581;ADJRIGHT=28053859	0/0:-0,-10.24,-204	0/0:-0,-12.04,-237.9	0/0:-0,-12.04,-239.3	0/0:-1.21,-7.22,-111	0/1:-32,-7.22,-108	0/1:-48,-8.43,-120	0/0:-0,-14.45,-284.5	0/0:-1.2,-18.06,-326.9	0/0:-0,-15.65,-309.7	0/0:-0,-10.84,-205.8	0/0:-0,-15.65,-311.9	0/1:-48,-3.01,-12	0/0:-0,-12.64,-239.7	0/0:-1.2,-8.43,-145.2	0/0:-0.6,-3.01,-48.6	0/0:-1.81,-2.41,-13.81	0/1:-32.61,-10.24,-156.7	0/0:-0,-10.24,-204	0/1:-94,-14.45,-190	0/1:-42.8,-13.25,-216	0/0:-0,-10.84,-216	0/0:-0.6,-1.2,-12.6	0/1:-29.6,-13.85,-239.65	0/0:-1.2,-4.21,-59.2	0/0:-0.6,-1.81,-24.6	0/0:-0,-14.45,-281.3	0/0:-0,-8.43,-168	0/0:-0,-7.83,-156	0/1:-45.7,-13.25,-216	0/1:-82,-15.65,-223.8	0/1:-36,-3.61,-35.3	0/1:-95.6,-8.43,-70	0/1:-48.08,-15.65,-253	0/0:-1.81,-13.25,-229.81	0/1:-36,-14.45,-248.4	0/1:-60,-6.62,-68	0/1:-36,-7.22,-107.4	0/0:-1.2,-7.22,-121.2	chr23	27982798	27982799	NM_174580.3	POU5F1	+	70783
chr23	28053581	28053859	SVTYPE=Bov-A2;END=28053859;SVLEN=278;ADJLEFT=28053581;ADJRIGHT=28053859	0/0:-0,-10.24,-204	0/0:-0,-12.04,-237.9	0/0:-0,-12.04,-239.3	0/0:-1.21,-7.22,-111	0/1:-32,-7.22,-108	0/1:-48,-8.43,-120	0/0:-0,-14.45,-284.5	0/0:-1.2,-18.06,-326.9	0/0:-0,-15.65,-309.7	0/0:-0,-10.84,-205.8	0/0:-0,-15.65,-311.9	0/1:-48,-3.01,-12	0/0:-0,-12.64,-239.7	0/0:-1.2,-8.43,-145.2	0/0:-0.6,-3.01,-48.6	0/0:-1.81,-2.41,-13.81	0/1:-32.61,-10.24,-156.7	0/0:-0,-10.24,-204	0/1:-94,-14.45,-190	0/1:-42.8,-13.25,-216	0/0:-0,-10.84,-216	0/0:-0.6,-1.2,-12.6	0/1:-29.6,-13.85,-239.65	0/0:-1.2,-4.21,-59.2	0/0:-0.6,-1.81,-24.6	0/0:-0,-14.45,-281.3	0/0:-0,-8.43,-168	0/0:-0,-7.83,-156	0/1:-45.7,-13.25,-216	0/1:-82,-15.65,-223.8	0/1:-36,-3.61,-35.3	0/1:-95.6,-8.43,-70	0/1:-48.08,-15.65,-253	0/0:-1.81,-13.25,-229.81	0/1:-36,-14.45,-248.4	0/1:-60,-6.62,-68	0/1:-36,-7.22,-107.4	0/0:-1.2,-7.22,-121.2	chr23	28133317	28133318	XM_024984135.1	MUCL3	-	79459
chr23	28053581	28053859	SVTYPE=Bov-A2;END=28053859;SVLEN=278;ADJLEFT=28053581;ADJRIGHT=28053859	0/0:-0,-10.24,-204	0/0:-0,-12.04,-237.9	0/0:-0,-12.04,-239.3	0/0:-1.21,-7.22,-111	0/1:-32,-7.22,-108	0/1:-48,-8.43,-120	0/0:-0,-14.45,-284.5	0/0:-1.2,-18.06,-326.9	0/0:-0,-15.65,-309.7	0/0:-0,-10.84,-205.8	0/0:-0,-15.65,-311.9	0/1:-48,-3.01,-12	0/0:-0,-12.64,-239.7	0/0:-1.2,-8.43,-145.2	0/0:-0.6,-3.01,-48.6	0/0:-1.81,-2.41,-13.81	0/1:-32.61,-10.24,-156.7	0/0:-0,-10.24,-204	0/1:-94,-14.45,-190	0/1:-42.8,-13.25,-216	0/0:-0,-10.84,-216	0/0:-0.6,-1.2,-12.6	0/1:-29.6,-13.85,-239.65	0/0:-1.2,-4.21,-59.2	0/0:-0.6,-1.81,-24.6	0/0:-0,-14.45,-281.3	0/0:-0,-8.43,-168	0/0:-0,-7.83,-156	0/1:-45.7,-13.25,-216	0/1:-82,-15.65,-223.8	0/1:-36,-3.61,-35.3	0/1:-95.6,-8.43,-70	0/1:-48.08,-15.65,-253	0/0:-1.81,-13.25,-229.81	0/1:-36,-14.45,-248.4	0/1:-60,-6.62,-68	0/1:-36,-7.22,-107.4	0/0:-1.2,-7.22,-121.2	chr23	28142646	28142647	NM_001114523.2	SFTA2	+	88788
chr23	28053581	28053859	SVTYPE=Bov-A2;END=28053859;SVLEN=278;ADJLEFT=28053581;ADJRIGHT=28053859	0/0:-0,-10.24,-204	0/0:-0,-12.04,-237.9	0/0:-0,-12.04,-239.3	0/0:-1.21,-7.22,-111	0/1:-32,-7.22,-108	0/1:-48,-8.43,-120	0/0:-0,-14.45,-284.5	0/0:-1.2,-18.06,-326.9	0/0:-0,-15.65,-309.7	0/0:-0,-10.84,-205.8	0/0:-0,-15.65,-311.9	0/1:-48,-3.01,-12	0/0:-0,-12.64,-239.7	0/0:-1.2,-8.43,-145.2	0/0:-0.6,-3.01,-48.6	0/0:-1.81,-2.41,-13.81	0/1:-32.61,-10.24,-156.7	0/0:-0,-10.24,-204	0/1:-94,-14.45,-190	0/1:-42.8,-13.25,-216	0/0:-0,-10.84,-216	0/0:-0.6,-1.2,-12.6	0/1:-29.6,-13.85,-239.65	0/0:-1.2,-4.21,-59.2	0/0:-0.6,-1.81,-24.6	0/0:-0,-14.45,-281.3	0/0:-0,-8.43,-168	0/0:-0,-7.83,-156	0/1:-45.7,-13.25,-216	0/1:-82,-15.65,-223.8	0/1:-36,-3.61,-35.3	0/1:-95.6,-8.43,-70	0/1:-48.08,-15.65,-253	0/0:-1.81,-13.25,-229.81	0/1:-36,-14.45,-248.4	0/1:-60,-6.62,-68	0/1:-36,-7.22,-107.4	0/0:-1.2,-7.22,-121.2	chr23	28144249	28144250	XR_003032319.1	LOC112443918	+	90391
chr23	28053581	28053859	SVTYPE=Bov-A2;END=28053859;SVLEN=278;ADJLEFT=28053581;ADJRIGHT=28053859	0/0:-0,-10.24,-204	0/0:-0,-12.04,-237.9	0/0:-0,-12.04,-239.3	0/0:-1.21,-7.22,-111	0/1:-32,-7.22,-108	0/1:-48,-8.43,-120	0/0:-0,-14.45,-284.5	0/0:-1.2,-18.06,-326.9	0/0:-0,-15.65,-309.7	0/0:-0,-10.84,-205.8	0/0:-0,-15.65,-311.9	0/1:-48,-3.01,-12	0/0:-0,-12.64,-239.7	0/0:-1.2,-8.43,-145.2	0/0:-0.6,-3.01,-48.6	0/0:-1.81,-2.41,-13.81	0/1:-32.61,-10.24,-156.7	0/0:-0,-10.24,-204	0/1:-94,-14.45,-190	0/1:-42.8,-13.25,-216	0/0:-0,-10.84,-216	0/0:-0.6,-1.2,-12.6	0/1:-29.6,-13.85,-239.65	0/0:-1.2,-4.21,-59.2	0/0:-0.6,-1.81,-24.6	0/0:-0,-14.45,-281.3	0/0:-0,-8.43,-168	0/0:-0,-7.83,-156	0/1:-45.7,-13.25,-216	0/1:-82,-15.65,-223.8	0/1:-36,-3.61,-35.3	0/1:-95.6,-8.43,-70	0/1:-48.08,-15.65,-253	0/0:-1.81,-13.25,-229.81	0/1:-36,-14.45,-248.4	0/1:-60,-6.62,-68	0/1:-36,-7.22,-107.4	0/0:-1.2,-7.22,-121.2	chr23	27961268	27961269	XM_024984136.1	LOC112443864	-	92313
chr23	28053581	28053859	SVTYPE=Bov-A2;END=28053859;SVLEN=278;ADJLEFT=28053581;ADJRIGHT=28053859	0/0:-0,-10.24,-204	0/0:-0,-12.04,-237.9	0/0:-0,-12.04,-239.3	0/0:-1.21,-7.22,-111	0/1:-32,-7.22,-108	0/1:-48,-8.43,-120	0/0:-0,-14.45,-284.5	0/0:-1.2,-18.06,-326.9	0/0:-0,-15.65,-309.7	0/0:-0,-10.84,-205.8	0/0:-0,-15.65,-311.9	0/1:-48,-3.01,-12	0/0:-0,-12.64,-239.7	0/0:-1.2,-8.43,-145.2	0/0:-0.6,-3.01,-48.6	0/0:-1.81,-2.41,-13.81	0/1:-32.61,-10.24,-156.7	0/0:-0,-10.24,-204	0/1:-94,-14.45,-190	0/1:-42.8,-13.25,-216	0/0:-0,-10.84,-216	0/0:-0.6,-1.2,-12.6	0/1:-29.6,-13.85,-239.65	0/0:-1.2,-4.21,-59.2	0/0:-0.6,-1.81,-24.6	0/0:-0,-14.45,-281.3	0/0:-0,-8.43,-168	0/0:-0,-7.83,-156	0/1:-45.7,-13.25,-216	0/1:-82,-15.65,-223.8	0/1:-36,-3.61,-35.3	0/1:-95.6,-8.43,-70	0/1:-48.08,-15.65,-253	0/0:-1.81,-13.25,-229.81	0/1:-36,-14.45,-248.4	0/1:-60,-6.62,-68	0/1:-36,-7.22,-107.4	0/0:-1.2,-7.22,-121.2	chr23	28159139	28159140	XM_005223583.4	VARS2	-	105281
chr23	28053581	28053859	SVTYPE=Bov-A2;END=28053859;SVLEN=278;ADJLEFT=28053581;ADJRIGHT=28053859	0/0:-0,-10.24,-204	0/0:-0,-12.04,-237.9	0/0:-0,-12.04,-239.3	0/0:-1.21,-7.22,-111	0/1:-32,-7.22,-108	0/1:-48,-8.43,-120	0/0:-0,-14.45,-284.5	0/0:-1.2,-18.06,-326.9	0/0:-0,-15.65,-309.7	0/0:-0,-10.84,-205.8	0/0:-0,-15.65,-311.9	0/1:-48,-3.01,-12	0/0:-0,-12.64,-239.7	0/0:-1.2,-8.43,-145.2	0/0:-0.6,-3.01,-48.6	0/0:-1.81,-2.41,-13.81	0/1:-32.61,-10.24,-156.7	0/0:-0,-10.24,-204	0/1:-94,-14.45,-190	0/1:-42.8,-13.25,-216	0/0:-0,-10.84,-216	0/0:-0.6,-1.2,-12.6	0/1:-29.6,-13.85,-239.65	0/0:-1.2,-4.21,-59.2	0/0:-0.6,-1.81,-24.6	0/0:-0,-14.45,-281.3	0/0:-0,-8.43,-168	0/0:-0,-7.83,-156	0/1:-45.7,-13.25,-216	0/1:-82,-15.65,-223.8	0/1:-36,-3.61,-35.3	0/1:-95.6,-8.43,-70	0/1:-48.08,-15.65,-253	0/0:-1.81,-13.25,-229.81	0/1:-36,-14.45,-248.4	0/1:-60,-6.62,-68	0/1:-36,-7.22,-107.4	0/0:-1.2,-7.22,-121.2	chr23	28165862	28165863	NM_001101057.1	GTF2H4	-	112004
chr23	28053581	28053859	SVTYPE=Bov-A2;END=28053859;SVLEN=278;ADJLEFT=28053581;ADJRIGHT=28053859	0/0:-0,-10.24,-204	0/0:-0,-12.04,-237.9	0/0:-0,-12.04,-239.3	0/0:-1.21,-7.22,-111	0/1:-32,-7.22,-108	0/1:-48,-8.43,-120	0/0:-0,-14.45,-284.5	0/0:-1.2,-18.06,-326.9	0/0:-0,-15.65,-309.7	0/0:-0,-10.84,-205.8	0/0:-0,-15.65,-311.9	0/1:-48,-3.01,-12	0/0:-0,-12.64,-239.7	0/0:-1.2,-8.43,-145.2	0/0:-0.6,-3.01,-48.6	0/0:-1.81,-2.41,-13.81	0/1:-32.61,-10.24,-156.7	0/0:-0,-10.24,-204	0/1:-94,-14.45,-190	0/1:-42.8,-13.25,-216	0/0:-0,-10.84,-216	0/0:-0.6,-1.2,-12.6	0/1:-29.6,-13.85,-239.65	0/0:-1.2,-4.21,-59.2	0/0:-0.6,-1.81,-24.6	0/0:-0,-14.45,-281.3	0/0:-0,-8.43,-168	0/0:-0,-7.83,-156	0/1:-45.7,-13.25,-216	0/1:-82,-15.65,-223.8	0/1:-36,-3.61,-35.3	0/1:-95.6,-8.43,-70	0/1:-48.08,-15.65,-253	0/0:-1.81,-13.25,-229.81	0/1:-36,-14.45,-248.4	0/1:-60,-6.62,-68	0/1:-36,-7.22,-107.4	0/0:-1.2,-7.22,-121.2	chr23	28186860	28186861	NM_001076012.2	DDR1	-	133002
chr23	28053581	28053859	SVTYPE=Bov-A2;END=28053859;SVLEN=278;ADJLEFT=28053581;ADJRIGHT=28053859	0/0:-0,-10.24,-204	0/0:-0,-12.04,-237.9	0/0:-0,-12.04,-239.3	0/0:-1.21,-7.22,-111	0/1:-32,-7.22,-108	0/1:-48,-8.43,-120	0/0:-0,-14.45,-284.5	0/0:-1.2,-18.06,-326.9	0/0:-0,-15.65,-309.7	0/0:-0,-10.84,-205.8	0/0:-0,-15.65,-311.9	0/1:-48,-3.01,-12	0/0:-0,-12.64,-239.7	0/0:-1.2,-8.43,-145.2	0/0:-0.6,-3.01,-48.6	0/0:-1.81,-2.41,-13.81	0/1:-32.61,-10.24,-156.7	0/0:-0,-10.24,-204	0/1:-94,-14.45,-190	0/1:-42.8,-13.25,-216	0/0:-0,-10.84,-216	0/0:-0.6,-1.2,-12.6	0/1:-29.6,-13.85,-239.65	0/0:-1.2,-4.21,-59.2	0/0:-0.6,-1.81,-24.6	0/0:-0,-14.45,-281.3	0/0:-0,-8.43,-168	0/0:-0,-7.83,-156	0/1:-45.7,-13.25,-216	0/1:-82,-15.65,-223.8	0/1:-36,-3.61,-35.3	0/1:-95.6,-8.43,-70	0/1:-48.08,-15.65,-253	0/0:-1.81,-13.25,-229.81	0/1:-36,-14.45,-248.4	0/1:-60,-6.62,-68	0/1:-36,-7.22,-107.4	0/0:-1.2,-7.22,-121.2	chr23	27913515	27913516	XM_010818345.3	MIC1	-	140066
chr23	28053581	28053859	SVTYPE=Bov-A2;END=28053859;SVLEN=278;ADJLEFT=28053581;ADJRIGHT=28053859	0/0:-0,-10.24,-204	0/0:-0,-12.04,-237.9	0/0:-0,-12.04,-239.3	0/0:-1.21,-7.22,-111	0/1:-32,-7.22,-108	0/1:-48,-8.43,-120	0/0:-0,-14.45,-284.5	0/0:-1.2,-18.06,-326.9	0/0:-0,-15.65,-309.7	0/0:-0,-10.84,-205.8	0/0:-0,-15.65,-311.9	0/1:-48,-3.01,-12	0/0:-0,-12.64,-239.7	0/0:-1.2,-8.43,-145.2	0/0:-0.6,-3.01,-48.6	0/0:-1.81,-2.41,-13.81	0/1:-32.61,-10.24,-156.7	0/0:-0,-10.24,-204	0/1:-94,-14.45,-190	0/1:-42.8,-13.25,-216	0/0:-0,-10.84,-216	0/0:-0.6,-1.2,-12.6	0/1:-29.6,-13.85,-239.65	0/0:-1.2,-4.21,-59.2	0/0:-0.6,-1.81,-24.6	0/0:-0,-14.45,-281.3	0/0:-0,-8.43,-168	0/0:-0,-7.83,-156	0/1:-45.7,-13.25,-216	0/1:-82,-15.65,-223.8	0/1:-36,-3.61,-35.3	0/1:-95.6,-8.43,-70	0/1:-48.08,-15.65,-253	0/0:-1.81,-13.25,-229.81	0/1:-36,-14.45,-248.4	0/1:-60,-6.62,-68	0/1:-36,-7.22,-107.4	0/0:-1.2,-7.22,-121.2	chr23	27898513	27898514	XM_024983903.1	LOC788634	+	155068
chr23	28053581	28053859	SVTYPE=Bov-A2;END=28053859;SVLEN=278;ADJLEFT=28053581;ADJRIGHT=28053859	0/0:-0,-10.24,-204	0/0:-0,-12.04,-237.9	0/0:-0,-12.04,-239.3	0/0:-1.21,-7.22,-111	0/1:-32,-7.22,-108	0/1:-48,-8.43,-120	0/0:-0,-14.45,-284.5	0/0:-1.2,-18.06,-326.9	0/0:-0,-15.65,-309.7	0/0:-0,-10.84,-205.8	0/0:-0,-15.65,-311.9	0/1:-48,-3.01,-12	0/0:-0,-12.64,-239.7	0/0:-1.2,-8.43,-145.2	0/0:-0.6,-3.01,-48.6	0/0:-1.81,-2.41,-13.81	0/1:-32.61,-10.24,-156.7	0/0:-0,-10.24,-204	0/1:-94,-14.45,-190	0/1:-42.8,-13.25,-216	0/0:-0,-10.84,-216	0/0:-0.6,-1.2,-12.6	0/1:-29.6,-13.85,-239.65	0/0:-1.2,-4.21,-59.2	0/0:-0.6,-1.81,-24.6	0/0:-0,-14.45,-281.3	0/0:-0,-8.43,-168	0/0:-0,-7.83,-156	0/1:-45.7,-13.25,-216	0/1:-82,-15.65,-223.8	0/1:-36,-3.61,-35.3	0/1:-95.6,-8.43,-70	0/1:-48.08,-15.65,-253	0/0:-1.81,-13.25,-229.81	0/1:-36,-14.45,-248.4	0/1:-60,-6.62,-68	0/1:-36,-7.22,-107.4	0/0:-1.2,-7.22,-121.2	chr23	28220013	28220014	XR_003032281.1	LOC112443865	-	166155
chr23	28053581	28053859	SVTYPE=Bov-A2;END=28053859;SVLEN=278;ADJLEFT=28053581;ADJRIGHT=28053859	0/0:-0,-10.24,-204	0/0:-0,-12.04,-237.9	0/0:-0,-12.04,-239.3	0/0:-1.21,-7.22,-111	0/1:-32,-7.22,-108	0/1:-48,-8.43,-120	0/0:-0,-14.45,-284.5	0/0:-1.2,-18.06,-326.9	0/0:-0,-15.65,-309.7	0/0:-0,-10.84,-205.8	0/0:-0,-15.65,-311.9	0/1:-48,-3.01,-12	0/0:-0,-12.64,-239.7	0/0:-1.2,-8.43,-145.2	0/0:-0.6,-3.01,-48.6	0/0:-1.81,-2.41,-13.81	0/1:-32.61,-10.24,-156.7	0/0:-0,-10.24,-204	0/1:-94,-14.45,-190	0/1:-42.8,-13.25,-216	0/0:-0,-10.84,-216	0/0:-0.6,-1.2,-12.6	0/1:-29.6,-13.85,-239.65	0/0:-1.2,-4.21,-59.2	0/0:-0.6,-1.81,-24.6	0/0:-0,-14.45,-281.3	0/0:-0,-8.43,-168	0/0:-0,-7.83,-156	0/1:-45.7,-13.25,-216	0/1:-82,-15.65,-223.8	0/1:-36,-3.61,-35.3	0/1:-95.6,-8.43,-70	0/1:-48.08,-15.65,-253	0/0:-1.81,-13.25,-229.81	0/1:-36,-14.45,-248.4	0/1:-60,-6.62,-68	0/1:-36,-7.22,-107.4	0/0:-1.2,-7.22,-121.2	chr23	27829715	27829716	XM_015459890.2	BoLA	+	223866
chr23	28053581	28053859	SVTYPE=Bov-A2;END=28053859;SVLEN=278;ADJLEFT=28053581;ADJRIGHT=28053859	0/0:-0,-10.24,-204	0/0:-0,-12.04,-237.9	0/0:-0,-12.04,-239.3	0/0:-1.21,-7.22,-111	0/1:-32,-7.22,-108	0/1:-48,-8.43,-120	0/0:-0,-14.45,-284.5	0/0:-1.2,-18.06,-326.9	0/0:-0,-15.65,-309.7	0/0:-0,-10.84,-205.8	0/0:-0,-15.65,-311.9	0/1:-48,-3.01,-12	0/0:-0,-12.64,-239.7	0/0:-1.2,-8.43,-145.2	0/0:-0.6,-3.01,-48.6	0/0:-1.81,-2.41,-13.81	0/1:-32.61,-10.24,-156.7	0/0:-0,-10.24,-204	0/1:-94,-14.45,-190	0/1:-42.8,-13.25,-216	0/0:-0,-10.84,-216	0/0:-0.6,-1.2,-12.6	0/1:-29.6,-13.85,-239.65	0/0:-1.2,-4.21,-59.2	0/0:-0.6,-1.81,-24.6	0/0:-0,-14.45,-281.3	0/0:-0,-8.43,-168	0/0:-0,-7.83,-156	0/1:-45.7,-13.25,-216	0/1:-82,-15.65,-223.8	0/1:-36,-3.61,-35.3	0/1:-95.6,-8.43,-70	0/1:-48.08,-15.65,-253	0/0:-1.81,-13.25,-229.81	0/1:-36,-14.45,-248.4	0/1:-60,-6.62,-68	0/1:-36,-7.22,-107.4	0/0:-1.2,-7.22,-121.2	chr23	28284912	28284913	NM_001075202.2	IER3	+	231054
chr23	28053581	28053859	SVTYPE=Bov-A2;END=28053859;SVLEN=278;ADJLEFT=28053581;ADJRIGHT=28053859	0/0:-0,-10.24,-204	0/0:-0,-12.04,-237.9	0/0:-0,-12.04,-239.3	0/0:-1.21,-7.22,-111	0/1:-32,-7.22,-108	0/1:-48,-8.43,-120	0/0:-0,-14.45,-284.5	0/0:-1.2,-18.06,-326.9	0/0:-0,-15.65,-309.7	0/0:-0,-10.84,-205.8	0/0:-0,-15.65,-311.9	0/1:-48,-3.01,-12	0/0:-0,-12.64,-239.7	0/0:-1.2,-8.43,-145.2	0/0:-0.6,-3.01,-48.6	0/0:-1.81,-2.41,-13.81	0/1:-32.61,-10.24,-156.7	0/0:-0,-10.24,-204	0/1:-94,-14.45,-190	0/1:-42.8,-13.25,-216	0/0:-0,-10.84,-216	0/0:-0.6,-1.2,-12.6	0/1:-29.6,-13.85,-239.65	0/0:-1.2,-4.21,-59.2	0/0:-0.6,-1.81,-24.6	0/0:-0,-14.45,-281.3	0/0:-0,-8.43,-168	0/0:-0,-7.83,-156	0/1:-45.7,-13.25,-216	0/1:-82,-15.65,-223.8	0/1:-36,-3.61,-35.3	0/1:-95.6,-8.43,-70	0/1:-48.08,-15.65,-253	0/0:-1.81,-13.25,-229.81	0/1:-36,-14.45,-248.4	0/1:-60,-6.62,-68	0/1:-36,-7.22,-107.4	0/0:-1.2,-7.22,-121.2	chr23	28286474	28286475	XM_005223662.4	FLOT1	+	232616
chr23	28053581	28053859	SVTYPE=Bov-A2;END=28053859;SVLEN=278;ADJLEFT=28053581;ADJRIGHT=28053859	0/0:-0,-10.24,-204	0/0:-0,-12.04,-237.9	0/0:-0,-12.04,-239.3	0/0:-1.21,-7.22,-111	0/1:-32,-7.22,-108	0/1:-48,-8.43,-120	0/0:-0,-14.45,-284.5	0/0:-1.2,-18.06,-326.9	0/0:-0,-15.65,-309.7	0/0:-0,-10.84,-205.8	0/0:-0,-15.65,-311.9	0/1:-48,-3.01,-12	0/0:-0,-12.64,-239.7	0/0:-1.2,-8.43,-145.2	0/0:-0.6,-3.01,-48.6	0/0:-1.81,-2.41,-13.81	0/1:-32.61,-10.24,-156.7	0/0:-0,-10.24,-204	0/1:-94,-14.45,-190	0/1:-42.8,-13.25,-216	0/0:-0,-10.84,-216	0/0:-0.6,-1.2,-12.6	0/1:-29.6,-13.85,-239.65	0/0:-1.2,-4.21,-59.2	0/0:-0.6,-1.81,-24.6	0/0:-0,-14.45,-281.3	0/0:-0,-8.43,-168	0/0:-0,-7.83,-156	0/1:-45.7,-13.25,-216	0/1:-82,-15.65,-223.8	0/1:-36,-3.61,-35.3	0/1:-95.6,-8.43,-70	0/1:-48.08,-15.65,-253	0/0:-1.81,-13.25,-229.81	0/1:-36,-14.45,-248.4	0/1:-60,-6.62,-68	0/1:-36,-7.22,-107.4	0/0:-1.2,-7.22,-121.2	chr23	28301776	28301777	NM_001046549.2	TUBB	-	247918
chr23	28735733	28736006	SVTYPE=Bov-A2;END=28736006;SVLEN=273;ADJLEFT=28735733;ADJRIGHT=28736006	0/1:-66.5,-15.65,-234	0/0:-1.2,-13.25,-221	0/0:-1.81,-8.43,-133.81	0/0:-0.6,-10.24,-192.6	0/1:-19.9,-3.01,-36	0/1:-39.4,-11.44,-177.7	0/1:-42.4,-18.06,-308.3	0/1:-71.4,-17.46,-259.52	0/1:-103.2,-9.03,-72	0/0:-0.6,-11.44,-211.7	0/0:-0,-17.46,-347.8	1/1:-59.9,-3.01,-0	0/0:-1.2,-9.63,-164.4	0/0:-0,-10.84,-213.4	0/1:-105,-10.84,-97.7	0/0:-1.2,-6.62,-109.2	1/1:-56.7,-3.01,-0	0/0:-1.2,-4.21,-61.2	0/0:-0.6,-8.43,-154.8	1/1:-35.2,-1.81,-0	0/1:-60,-16.86,-274.2	1/1:-38.6,-2.41,-0.13	1/1:-78.2,-4.21,-0	0/1:-81.46,-15.05,-204	0/1:-48,-9.63,-141.1	0/0:-1.2,-4.82,-68.8	0/1:-53.3,-9.63,-132	0/0:-1.2,-9.03,-155.2	0/1:-128.5,-17.46,-214.6	0/1:-72,-7.22,-72	0/1:-102.4,-10.84,-106	0/0:-1.81,-12.64,-216.31	0/0:-1.81,-19.27,-347.81	0/0:-0,-10.24,-203.2	0/1:-36,-6.02,-84	0/0:-1.2,-4.82,-69.2	1/1:-75,-4.21,-0	0/0:-0,-3.61,-70.9	chr23	28732803	28732804	XR_003032215.1	LOC112443819	+	2930
chr23	28735733	28736006	SVTYPE=Bov-A2;END=28736006;SVLEN=273;ADJLEFT=28735733;ADJRIGHT=28736006	0/1:-66.5,-15.65,-234	0/0:-1.2,-13.25,-221	0/0:-1.81,-8.43,-133.81	0/0:-0.6,-10.24,-192.6	0/1:-19.9,-3.01,-36	0/1:-39.4,-11.44,-177.7	0/1:-42.4,-18.06,-308.3	0/1:-71.4,-17.46,-259.52	0/1:-103.2,-9.03,-72	0/0:-0.6,-11.44,-211.7	0/0:-0,-17.46,-347.8	1/1:-59.9,-3.01,-0	0/0:-1.2,-9.63,-164.4	0/0:-0,-10.84,-213.4	0/1:-105,-10.84,-97.7	0/0:-1.2,-6.62,-109.2	1/1:-56.7,-3.01,-0	0/0:-1.2,-4.21,-61.2	0/0:-0.6,-8.43,-154.8	1/1:-35.2,-1.81,-0	0/1:-60,-16.86,-274.2	1/1:-38.6,-2.41,-0.13	1/1:-78.2,-4.21,-0	0/1:-81.46,-15.05,-204	0/1:-48,-9.63,-141.1	0/0:-1.2,-4.82,-68.8	0/1:-53.3,-9.63,-132	0/0:-1.2,-9.03,-155.2	0/1:-128.5,-17.46,-214.6	0/1:-72,-7.22,-72	0/1:-102.4,-10.84,-106	0/0:-1.81,-12.64,-216.31	0/0:-1.81,-19.27,-347.81	0/0:-0,-10.24,-203.2	0/1:-36,-6.02,-84	0/0:-1.2,-4.82,-69.2	1/1:-75,-4.21,-0	0/0:-0,-3.61,-70.9	chr23	28724352	28724353	XM_010818341.3	BOLA	-	11381
chr23	28735733	28736006	SVTYPE=Bov-A2;END=28736006;SVLEN=273;ADJLEFT=28735733;ADJRIGHT=28736006	0/1:-66.5,-15.65,-234	0/0:-1.2,-13.25,-221	0/0:-1.81,-8.43,-133.81	0/0:-0.6,-10.24,-192.6	0/1:-19.9,-3.01,-36	0/1:-39.4,-11.44,-177.7	0/1:-42.4,-18.06,-308.3	0/1:-71.4,-17.46,-259.52	0/1:-103.2,-9.03,-72	0/0:-0.6,-11.44,-211.7	0/0:-0,-17.46,-347.8	1/1:-59.9,-3.01,-0	0/0:-1.2,-9.63,-164.4	0/0:-0,-10.84,-213.4	0/1:-105,-10.84,-97.7	0/0:-1.2,-6.62,-109.2	1/1:-56.7,-3.01,-0	0/0:-1.2,-4.21,-61.2	0/0:-0.6,-8.43,-154.8	1/1:-35.2,-1.81,-0	0/1:-60,-16.86,-274.2	1/1:-38.6,-2.41,-0.13	1/1:-78.2,-4.21,-0	0/1:-81.46,-15.05,-204	0/1:-48,-9.63,-141.1	0/0:-1.2,-4.82,-68.8	0/1:-53.3,-9.63,-132	0/0:-1.2,-9.03,-155.2	0/1:-128.5,-17.46,-214.6	0/1:-72,-7.22,-72	0/1:-102.4,-10.84,-106	0/0:-1.81,-12.64,-216.31	0/0:-1.81,-19.27,-347.81	0/0:-0,-10.24,-203.2	0/1:-36,-6.02,-84	0/0:-1.2,-4.82,-69.2	1/1:-75,-4.21,-0	0/0:-0,-3.61,-70.9	chr23	28769819	28769820	XM_002697339.6	LOC785873	+	33814
chr23	28735733	28736006	SVTYPE=Bov-A2;END=28736006;SVLEN=273;ADJLEFT=28735733;ADJRIGHT=28736006	0/1:-66.5,-15.65,-234	0/0:-1.2,-13.25,-221	0/0:-1.81,-8.43,-133.81	0/0:-0.6,-10.24,-192.6	0/1:-19.9,-3.01,-36	0/1:-39.4,-11.44,-177.7	0/1:-42.4,-18.06,-308.3	0/1:-71.4,-17.46,-259.52	0/1:-103.2,-9.03,-72	0/0:-0.6,-11.44,-211.7	0/0:-0,-17.46,-347.8	1/1:-59.9,-3.01,-0	0/0:-1.2,-9.63,-164.4	0/0:-0,-10.84,-213.4	0/1:-105,-10.84,-97.7	0/0:-1.2,-6.62,-109.2	1/1:-56.7,-3.01,-0	0/0:-1.2,-4.21,-61.2	0/0:-0.6,-8.43,-154.8	1/1:-35.2,-1.81,-0	0/1:-60,-16.86,-274.2	1/1:-38.6,-2.41,-0.13	1/1:-78.2,-4.21,-0	0/1:-81.46,-15.05,-204	0/1:-48,-9.63,-141.1	0/0:-1.2,-4.82,-68.8	0/1:-53.3,-9.63,-132	0/0:-1.2,-9.03,-155.2	0/1:-128.5,-17.46,-214.6	0/1:-72,-7.22,-72	0/1:-102.4,-10.84,-106	0/0:-1.81,-12.64,-216.31	0/0:-1.81,-19.27,-347.81	0/0:-0,-10.24,-203.2	0/1:-36,-6.02,-84	0/0:-1.2,-4.82,-69.2	1/1:-75,-4.21,-0	0/0:-0,-3.61,-70.9	chr23	28667461	28667462	XM_024983412.1	JSP.1	-	68272
chr23	28735733	28736006	SVTYPE=Bov-A2;END=28736006;SVLEN=273;ADJLEFT=28735733;ADJRIGHT=28736006	0/1:-66.5,-15.65,-234	0/0:-1.2,-13.25,-221	0/0:-1.81,-8.43,-133.81	0/0:-0.6,-10.24,-192.6	0/1:-19.9,-3.01,-36	0/1:-39.4,-11.44,-177.7	0/1:-42.4,-18.06,-308.3	0/1:-71.4,-17.46,-259.52	0/1:-103.2,-9.03,-72	0/0:-0.6,-11.44,-211.7	0/0:-0,-17.46,-347.8	1/1:-59.9,-3.01,-0	0/0:-1.2,-9.63,-164.4	0/0:-0,-10.84,-213.4	0/1:-105,-10.84,-97.7	0/0:-1.2,-6.62,-109.2	1/1:-56.7,-3.01,-0	0/0:-1.2,-4.21,-61.2	0/0:-0.6,-8.43,-154.8	1/1:-35.2,-1.81,-0	0/1:-60,-16.86,-274.2	1/1:-38.6,-2.41,-0.13	1/1:-78.2,-4.21,-0	0/1:-81.46,-15.05,-204	0/1:-48,-9.63,-141.1	0/0:-1.2,-4.82,-68.8	0/1:-53.3,-9.63,-132	0/0:-1.2,-9.03,-155.2	0/1:-128.5,-17.46,-214.6	0/1:-72,-7.22,-72	0/1:-102.4,-10.84,-106	0/0:-1.81,-12.64,-216.31	0/0:-1.81,-19.27,-347.81	0/0:-0,-10.24,-203.2	0/1:-36,-6.02,-84	0/0:-1.2,-4.82,-69.2	1/1:-75,-4.21,-0	0/0:-0,-3.61,-70.9	chr23	28815061	28815062	XM_024983693.1	TRIM15	-	79056
chr23	28735733	28736006	SVTYPE=Bov-A2;END=28736006;SVLEN=273;ADJLEFT=28735733;ADJRIGHT=28736006	0/1:-66.5,-15.65,-234	0/0:-1.2,-13.25,-221	0/0:-1.81,-8.43,-133.81	0/0:-0.6,-10.24,-192.6	0/1:-19.9,-3.01,-36	0/1:-39.4,-11.44,-177.7	0/1:-42.4,-18.06,-308.3	0/1:-71.4,-17.46,-259.52	0/1:-103.2,-9.03,-72	0/0:-0.6,-11.44,-211.7	0/0:-0,-17.46,-347.8	1/1:-59.9,-3.01,-0	0/0:-1.2,-9.63,-164.4	0/0:-0,-10.84,-213.4	0/1:-105,-10.84,-97.7	0/0:-1.2,-6.62,-109.2	1/1:-56.7,-3.01,-0	0/0:-1.2,-4.21,-61.2	0/0:-0.6,-8.43,-154.8	1/1:-35.2,-1.81,-0	0/1:-60,-16.86,-274.2	1/1:-38.6,-2.41,-0.13	1/1:-78.2,-4.21,-0	0/1:-81.46,-15.05,-204	0/1:-48,-9.63,-141.1	0/0:-1.2,-4.82,-68.8	0/1:-53.3,-9.63,-132	0/0:-1.2,-9.03,-155.2	0/1:-128.5,-17.46,-214.6	0/1:-72,-7.22,-72	0/1:-102.4,-10.84,-106	0/0:-1.81,-12.64,-216.31	0/0:-1.81,-19.27,-347.81	0/0:-0,-10.24,-203.2	0/1:-36,-6.02,-84	0/0:-1.2,-4.82,-69.2	1/1:-75,-4.21,-0	0/0:-0,-3.61,-70.9	chr23	28816473	28816474	NM_001015607.1	TRIM10	+	80468
chr23	28735733	28736006	SVTYPE=Bov-A2;END=28736006;SVLEN=273;ADJLEFT=28735733;ADJRIGHT=28736006	0/1:-66.5,-15.65,-234	0/0:-1.2,-13.25,-221	0/0:-1.81,-8.43,-133.81	0/0:-0.6,-10.24,-192.6	0/1:-19.9,-3.01,-36	0/1:-39.4,-11.44,-177.7	0/1:-42.4,-18.06,-308.3	0/1:-71.4,-17.46,-259.52	0/1:-103.2,-9.03,-72	0/0:-0.6,-11.44,-211.7	0/0:-0,-17.46,-347.8	1/1:-59.9,-3.01,-0	0/0:-1.2,-9.63,-164.4	0/0:-0,-10.84,-213.4	0/1:-105,-10.84,-97.7	0/0:-1.2,-6.62,-109.2	1/1:-56.7,-3.01,-0	0/0:-1.2,-4.21,-61.2	0/0:-0.6,-8.43,-154.8	1/1:-35.2,-1.81,-0	0/1:-60,-16.86,-274.2	1/1:-38.6,-2.41,-0.13	1/1:-78.2,-4.21,-0	0/1:-81.46,-15.05,-204	0/1:-48,-9.63,-141.1	0/0:-1.2,-4.82,-68.8	0/1:-53.3,-9.63,-132	0/0:-1.2,-9.03,-155.2	0/1:-128.5,-17.46,-214.6	0/1:-72,-7.22,-72	0/1:-102.4,-10.84,-106	0/0:-1.81,-12.64,-216.31	0/0:-1.81,-19.27,-347.81	0/0:-0,-10.24,-203.2	0/1:-36,-6.02,-84	0/0:-1.2,-4.82,-69.2	1/1:-75,-4.21,-0	0/0:-0,-3.61,-70.9	chr23	28631369	28631370	XR_814853.3	LOC104975666	+	104364
chr23	28735733	28736006	SVTYPE=Bov-A2;END=28736006;SVLEN=273;ADJLEFT=28735733;ADJRIGHT=28736006	0/1:-66.5,-15.65,-234	0/0:-1.2,-13.25,-221	0/0:-1.81,-8.43,-133.81	0/0:-0.6,-10.24,-192.6	0/1:-19.9,-3.01,-36	0/1:-39.4,-11.44,-177.7	0/1:-42.4,-18.06,-308.3	0/1:-71.4,-17.46,-259.52	0/1:-103.2,-9.03,-72	0/0:-0.6,-11.44,-211.7	0/0:-0,-17.46,-347.8	1/1:-59.9,-3.01,-0	0/0:-1.2,-9.63,-164.4	0/0:-0,-10.84,-213.4	0/1:-105,-10.84,-97.7	0/0:-1.2,-6.62,-109.2	1/1:-56.7,-3.01,-0	0/0:-1.2,-4.21,-61.2	0/0:-0.6,-8.43,-154.8	1/1:-35.2,-1.81,-0	0/1:-60,-16.86,-274.2	1/1:-38.6,-2.41,-0.13	1/1:-78.2,-4.21,-0	0/1:-81.46,-15.05,-204	0/1:-48,-9.63,-141.1	0/0:-1.2,-4.82,-68.8	0/1:-53.3,-9.63,-132	0/0:-1.2,-9.03,-155.2	0/1:-128.5,-17.46,-214.6	0/1:-72,-7.22,-72	0/1:-102.4,-10.84,-106	0/0:-1.81,-12.64,-216.31	0/0:-1.81,-19.27,-347.81	0/0:-0,-10.24,-203.2	0/1:-36,-6.02,-84	0/0:-1.2,-4.82,-69.2	1/1:-75,-4.21,-0	0/0:-0,-3.61,-70.9	chr23	28841507	28841508	NM_001103306.1	TRIM40	-	105502
chr23	28735733	28736006	SVTYPE=Bov-A2;END=28736006;SVLEN=273;ADJLEFT=28735733;ADJRIGHT=28736006	0/1:-66.5,-15.65,-234	0/0:-1.2,-13.25,-221	0/0:-1.81,-8.43,-133.81	0/0:-0.6,-10.24,-192.6	0/1:-19.9,-3.01,-36	0/1:-39.4,-11.44,-177.7	0/1:-42.4,-18.06,-308.3	0/1:-71.4,-17.46,-259.52	0/1:-103.2,-9.03,-72	0/0:-0.6,-11.44,-211.7	0/0:-0,-17.46,-347.8	1/1:-59.9,-3.01,-0	0/0:-1.2,-9.63,-164.4	0/0:-0,-10.84,-213.4	0/1:-105,-10.84,-97.7	0/0:-1.2,-6.62,-109.2	1/1:-56.7,-3.01,-0	0/0:-1.2,-4.21,-61.2	0/0:-0.6,-8.43,-154.8	1/1:-35.2,-1.81,-0	0/1:-60,-16.86,-274.2	1/1:-38.6,-2.41,-0.13	1/1:-78.2,-4.21,-0	0/1:-81.46,-15.05,-204	0/1:-48,-9.63,-141.1	0/0:-1.2,-4.82,-68.8	0/1:-53.3,-9.63,-132	0/0:-1.2,-9.03,-155.2	0/1:-128.5,-17.46,-214.6	0/1:-72,-7.22,-72	0/1:-102.4,-10.84,-106	0/0:-1.81,-12.64,-216.31	0/0:-1.81,-19.27,-347.81	0/0:-0,-10.24,-203.2	0/1:-36,-6.02,-84	0/0:-1.2,-4.82,-69.2	1/1:-75,-4.21,-0	0/0:-0,-3.61,-70.9	chr23	28853941	28853942	XM_024984035.1	TRIM31	+	117936
chr23	28735733	28736006	SVTYPE=Bov-A2;END=28736006;SVLEN=273;ADJLEFT=28735733;ADJRIGHT=28736006	0/1:-66.5,-15.65,-234	0/0:-1.2,-13.25,-221	0/0:-1.81,-8.43,-133.81	0/0:-0.6,-10.24,-192.6	0/1:-19.9,-3.01,-36	0/1:-39.4,-11.44,-177.7	0/1:-42.4,-18.06,-308.3	0/1:-71.4,-17.46,-259.52	0/1:-103.2,-9.03,-72	0/0:-0.6,-11.44,-211.7	0/0:-0,-17.46,-347.8	1/1:-59.9,-3.01,-0	0/0:-1.2,-9.63,-164.4	0/0:-0,-10.84,-213.4	0/1:-105,-10.84,-97.7	0/0:-1.2,-6.62,-109.2	1/1:-56.7,-3.01,-0	0/0:-1.2,-4.21,-61.2	0/0:-0.6,-8.43,-154.8	1/1:-35.2,-1.81,-0	0/1:-60,-16.86,-274.2	1/1:-38.6,-2.41,-0.13	1/1:-78.2,-4.21,-0	0/1:-81.46,-15.05,-204	0/1:-48,-9.63,-141.1	0/0:-1.2,-4.82,-68.8	0/1:-53.3,-9.63,-132	0/0:-1.2,-9.03,-155.2	0/1:-128.5,-17.46,-214.6	0/1:-72,-7.22,-72	0/1:-102.4,-10.84,-106	0/0:-1.81,-12.64,-216.31	0/0:-1.81,-19.27,-347.81	0/0:-0,-10.24,-203.2	0/1:-36,-6.02,-84	0/0:-1.2,-4.82,-69.2	1/1:-75,-4.21,-0	0/0:-0,-3.61,-70.9	chr23	28878785	28878786	XR_814859.3	LOC104975670	-	142780
chr23	28735733	28736006	SVTYPE=Bov-A2;END=28736006;SVLEN=273;ADJLEFT=28735733;ADJRIGHT=28736006	0/1:-66.5,-15.65,-234	0/0:-1.2,-13.25,-221	0/0:-1.81,-8.43,-133.81	0/0:-0.6,-10.24,-192.6	0/1:-19.9,-3.01,-36	0/1:-39.4,-11.44,-177.7	0/1:-42.4,-18.06,-308.3	0/1:-71.4,-17.46,-259.52	0/1:-103.2,-9.03,-72	0/0:-0.6,-11.44,-211.7	0/0:-0,-17.46,-347.8	1/1:-59.9,-3.01,-0	0/0:-1.2,-9.63,-164.4	0/0:-0,-10.84,-213.4	0/1:-105,-10.84,-97.7	0/0:-1.2,-6.62,-109.2	1/1:-56.7,-3.01,-0	0/0:-1.2,-4.21,-61.2	0/0:-0.6,-8.43,-154.8	1/1:-35.2,-1.81,-0	0/1:-60,-16.86,-274.2	1/1:-38.6,-2.41,-0.13	1/1:-78.2,-4.21,-0	0/1:-81.46,-15.05,-204	0/1:-48,-9.63,-141.1	0/0:-1.2,-4.82,-68.8	0/1:-53.3,-9.63,-132	0/0:-1.2,-9.03,-155.2	0/1:-128.5,-17.46,-214.6	0/1:-72,-7.22,-72	0/1:-102.4,-10.84,-106	0/0:-1.81,-12.64,-216.31	0/0:-1.81,-19.27,-347.81	0/0:-0,-10.24,-203.2	0/1:-36,-6.02,-84	0/0:-1.2,-4.82,-69.2	1/1:-75,-4.21,-0	0/0:-0,-3.61,-70.9	chr23	28904297	28904298	XM_003587705.5	RNF39	+	168292
chr23	28735733	28736006	SVTYPE=Bov-A2;END=28736006;SVLEN=273;ADJLEFT=28735733;ADJRIGHT=28736006	0/1:-66.5,-15.65,-234	0/0:-1.2,-13.25,-221	0/0:-1.81,-8.43,-133.81	0/0:-0.6,-10.24,-192.6	0/1:-19.9,-3.01,-36	0/1:-39.4,-11.44,-177.7	0/1:-42.4,-18.06,-308.3	0/1:-71.4,-17.46,-259.52	0/1:-103.2,-9.03,-72	0/0:-0.6,-11.44,-211.7	0/0:-0,-17.46,-347.8	1/1:-59.9,-3.01,-0	0/0:-1.2,-9.63,-164.4	0/0:-0,-10.84,-213.4	0/1:-105,-10.84,-97.7	0/0:-1.2,-6.62,-109.2	1/1:-56.7,-3.01,-0	0/0:-1.2,-4.21,-61.2	0/0:-0.6,-8.43,-154.8	1/1:-35.2,-1.81,-0	0/1:-60,-16.86,-274.2	1/1:-38.6,-2.41,-0.13	1/1:-78.2,-4.21,-0	0/1:-81.46,-15.05,-204	0/1:-48,-9.63,-141.1	0/0:-1.2,-4.82,-68.8	0/1:-53.3,-9.63,-132	0/0:-1.2,-9.03,-155.2	0/1:-128.5,-17.46,-214.6	0/1:-72,-7.22,-72	0/1:-102.4,-10.84,-106	0/0:-1.81,-12.64,-216.31	0/0:-1.81,-19.27,-347.81	0/0:-0,-10.24,-203.2	0/1:-36,-6.02,-84	0/0:-1.2,-4.82,-69.2	1/1:-75,-4.21,-0	0/0:-0,-3.61,-70.9	chr23	28913054	28913055	NM_001100295.2	PPP1R11	-	177049
chr23	28735733	28736006	SVTYPE=Bov-A2;END=28736006;SVLEN=273;ADJLEFT=28735733;ADJRIGHT=28736006	0/1:-66.5,-15.65,-234	0/0:-1.2,-13.25,-221	0/0:-1.81,-8.43,-133.81	0/0:-0.6,-10.24,-192.6	0/1:-19.9,-3.01,-36	0/1:-39.4,-11.44,-177.7	0/1:-42.4,-18.06,-308.3	0/1:-71.4,-17.46,-259.52	0/1:-103.2,-9.03,-72	0/0:-0.6,-11.44,-211.7	0/0:-0,-17.46,-347.8	1/1:-59.9,-3.01,-0	0/0:-1.2,-9.63,-164.4	0/0:-0,-10.84,-213.4	0/1:-105,-10.84,-97.7	0/0:-1.2,-6.62,-109.2	1/1:-56.7,-3.01,-0	0/0:-1.2,-4.21,-61.2	0/0:-0.6,-8.43,-154.8	1/1:-35.2,-1.81,-0	0/1:-60,-16.86,-274.2	1/1:-38.6,-2.41,-0.13	1/1:-78.2,-4.21,-0	0/1:-81.46,-15.05,-204	0/1:-48,-9.63,-141.1	0/0:-1.2,-4.82,-68.8	0/1:-53.3,-9.63,-132	0/0:-1.2,-9.03,-155.2	0/1:-128.5,-17.46,-214.6	0/1:-72,-7.22,-72	0/1:-102.4,-10.84,-106	0/0:-1.81,-12.64,-216.31	0/0:-1.81,-19.27,-347.81	0/0:-0,-10.24,-203.2	0/1:-36,-6.02,-84	0/0:-1.2,-4.82,-69.2	1/1:-75,-4.21,-0	0/0:-0,-3.61,-70.9	chr23	28552385	28552386	XM_005223618.4	BOLA-NC1	-	183348
chr23	28735733	28736006	SVTYPE=Bov-A2;END=28736006;SVLEN=273;ADJLEFT=28735733;ADJRIGHT=28736006	0/1:-66.5,-15.65,-234	0/0:-1.2,-13.25,-221	0/0:-1.81,-8.43,-133.81	0/0:-0.6,-10.24,-192.6	0/1:-19.9,-3.01,-36	0/1:-39.4,-11.44,-177.7	0/1:-42.4,-18.06,-308.3	0/1:-71.4,-17.46,-259.52	0/1:-103.2,-9.03,-72	0/0:-0.6,-11.44,-211.7	0/0:-0,-17.46,-347.8	1/1:-59.9,-3.01,-0	0/0:-1.2,-9.63,-164.4	0/0:-0,-10.84,-213.4	0/1:-105,-10.84,-97.7	0/0:-1.2,-6.62,-109.2	1/1:-56.7,-3.01,-0	0/0:-1.2,-4.21,-61.2	0/0:-0.6,-8.43,-154.8	1/1:-35.2,-1.81,-0	0/1:-60,-16.86,-274.2	1/1:-38.6,-2.41,-0.13	1/1:-78.2,-4.21,-0	0/1:-81.46,-15.05,-204	0/1:-48,-9.63,-141.1	0/0:-1.2,-4.82,-68.8	0/1:-53.3,-9.63,-132	0/0:-1.2,-9.03,-155.2	0/1:-128.5,-17.46,-214.6	0/1:-72,-7.22,-72	0/1:-102.4,-10.84,-106	0/0:-1.81,-12.64,-216.31	0/0:-1.81,-19.27,-347.81	0/0:-0,-10.24,-203.2	0/1:-36,-6.02,-84	0/0:-1.2,-4.82,-69.2	1/1:-75,-4.21,-0	0/0:-0,-3.61,-70.9	chr23	28920588	28920589	XR_003032249.1	LOC101907137	+	184583
chr23	28735733	28736006	SVTYPE=Bov-A2;END=28736006;SVLEN=273;ADJLEFT=28735733;ADJRIGHT=28736006	0/1:-66.5,-15.65,-234	0/0:-1.2,-13.25,-221	0/0:-1.81,-8.43,-133.81	0/0:-0.6,-10.24,-192.6	0/1:-19.9,-3.01,-36	0/1:-39.4,-11.44,-177.7	0/1:-42.4,-18.06,-308.3	0/1:-71.4,-17.46,-259.52	0/1:-103.2,-9.03,-72	0/0:-0.6,-11.44,-211.7	0/0:-0,-17.46,-347.8	1/1:-59.9,-3.01,-0	0/0:-1.2,-9.63,-164.4	0/0:-0,-10.84,-213.4	0/1:-105,-10.84,-97.7	0/0:-1.2,-6.62,-109.2	1/1:-56.7,-3.01,-0	0/0:-1.2,-4.21,-61.2	0/0:-0.6,-8.43,-154.8	1/1:-35.2,-1.81,-0	0/1:-60,-16.86,-274.2	1/1:-38.6,-2.41,-0.13	1/1:-78.2,-4.21,-0	0/1:-81.46,-15.05,-204	0/1:-48,-9.63,-141.1	0/0:-1.2,-4.82,-68.8	0/1:-53.3,-9.63,-132	0/0:-1.2,-9.03,-155.2	0/1:-128.5,-17.46,-214.6	0/1:-72,-7.22,-72	0/1:-102.4,-10.84,-106	0/0:-1.81,-12.64,-216.31	0/0:-1.81,-19.27,-347.81	0/0:-0,-10.24,-203.2	0/1:-36,-6.02,-84	0/0:-1.2,-4.82,-69.2	1/1:-75,-4.21,-0	0/0:-0,-3.61,-70.9	chr23	28920654	28920655	XM_005223666.4	ZNRD1	-	184649
chr23	28735733	28736006	SVTYPE=Bov-A2;END=28736006;SVLEN=273;ADJLEFT=28735733;ADJRIGHT=28736006	0/1:-66.5,-15.65,-234	0/0:-1.2,-13.25,-221	0/0:-1.81,-8.43,-133.81	0/0:-0.6,-10.24,-192.6	0/1:-19.9,-3.01,-36	0/1:-39.4,-11.44,-177.7	0/1:-42.4,-18.06,-308.3	0/1:-71.4,-17.46,-259.52	0/1:-103.2,-9.03,-72	0/0:-0.6,-11.44,-211.7	0/0:-0,-17.46,-347.8	1/1:-59.9,-3.01,-0	0/0:-1.2,-9.63,-164.4	0/0:-0,-10.84,-213.4	0/1:-105,-10.84,-97.7	0/0:-1.2,-6.62,-109.2	1/1:-56.7,-3.01,-0	0/0:-1.2,-4.21,-61.2	0/0:-0.6,-8.43,-154.8	1/1:-35.2,-1.81,-0	0/1:-60,-16.86,-274.2	1/1:-38.6,-2.41,-0.13	1/1:-78.2,-4.21,-0	0/1:-81.46,-15.05,-204	0/1:-48,-9.63,-141.1	0/0:-1.2,-4.82,-68.8	0/1:-53.3,-9.63,-132	0/0:-1.2,-9.03,-155.2	0/1:-128.5,-17.46,-214.6	0/1:-72,-7.22,-72	0/1:-102.4,-10.84,-106	0/0:-1.81,-12.64,-216.31	0/0:-1.81,-19.27,-347.81	0/0:-0,-10.24,-203.2	0/1:-36,-6.02,-84	0/0:-1.2,-4.82,-69.2	1/1:-75,-4.21,-0	0/0:-0,-3.61,-70.9	chr23	28540686	28540687	XR_001494886.2	LOC104975667	-	195047
chr23	28735733	28736006	SVTYPE=Bov-A2;END=28736006;SVLEN=273;ADJLEFT=28735733;ADJRIGHT=28736006	0/1:-66.5,-15.65,-234	0/0:-1.2,-13.25,-221	0/0:-1.81,-8.43,-133.81	0/0:-0.6,-10.24,-192.6	0/1:-19.9,-3.01,-36	0/1:-39.4,-11.44,-177.7	0/1:-42.4,-18.06,-308.3	0/1:-71.4,-17.46,-259.52	0/1:-103.2,-9.03,-72	0/0:-0.6,-11.44,-211.7	0/0:-0,-17.46,-347.8	1/1:-59.9,-3.01,-0	0/0:-1.2,-9.63,-164.4	0/0:-0,-10.84,-213.4	0/1:-105,-10.84,-97.7	0/0:-1.2,-6.62,-109.2	1/1:-56.7,-3.01,-0	0/0:-1.2,-4.21,-61.2	0/0:-0.6,-8.43,-154.8	1/1:-35.2,-1.81,-0	0/1:-60,-16.86,-274.2	1/1:-38.6,-2.41,-0.13	1/1:-78.2,-4.21,-0	0/1:-81.46,-15.05,-204	0/1:-48,-9.63,-141.1	0/0:-1.2,-4.82,-68.8	0/1:-53.3,-9.63,-132	0/0:-1.2,-9.03,-155.2	0/1:-128.5,-17.46,-214.6	0/1:-72,-7.22,-72	0/1:-102.4,-10.84,-106	0/0:-1.81,-12.64,-216.31	0/0:-1.81,-19.27,-347.81	0/0:-0,-10.24,-203.2	0/1:-36,-6.02,-84	0/0:-1.2,-4.82,-69.2	1/1:-75,-4.21,-0	0/0:-0,-3.61,-70.9	chr23	28936965	28936966	XM_010818393.3	ZFP57	+	200960
chr23	28735733	28736006	SVTYPE=Bov-A2;END=28736006;SVLEN=273;ADJLEFT=28735733;ADJRIGHT=28736006	0/1:-66.5,-15.65,-234	0/0:-1.2,-13.25,-221	0/0:-1.81,-8.43,-133.81	0/0:-0.6,-10.24,-192.6	0/1:-19.9,-3.01,-36	0/1:-39.4,-11.44,-177.7	0/1:-42.4,-18.06,-308.3	0/1:-71.4,-17.46,-259.52	0/1:-103.2,-9.03,-72	0/0:-0.6,-11.44,-211.7	0/0:-0,-17.46,-347.8	1/1:-59.9,-3.01,-0	0/0:-1.2,-9.63,-164.4	0/0:-0,-10.84,-213.4	0/1:-105,-10.84,-97.7	0/0:-1.2,-6.62,-109.2	1/1:-56.7,-3.01,-0	0/0:-1.2,-4.21,-61.2	0/0:-0.6,-8.43,-154.8	1/1:-35.2,-1.81,-0	0/1:-60,-16.86,-274.2	1/1:-38.6,-2.41,-0.13	1/1:-78.2,-4.21,-0	0/1:-81.46,-15.05,-204	0/1:-48,-9.63,-141.1	0/0:-1.2,-4.82,-68.8	0/1:-53.3,-9.63,-132	0/0:-1.2,-9.03,-155.2	0/1:-128.5,-17.46,-214.6	0/1:-72,-7.22,-72	0/1:-102.4,-10.84,-106	0/0:-1.81,-12.64,-216.31	0/0:-1.81,-19.27,-347.81	0/0:-0,-10.24,-203.2	0/1:-36,-6.02,-84	0/0:-1.2,-4.82,-69.2	1/1:-75,-4.21,-0	0/0:-0,-3.61,-70.9	chr23	28956143	28956144	XM_005223595.4	MOG	-	220138
chr23	28735733	28736006	SVTYPE=Bov-A2;END=28736006;SVLEN=273;ADJLEFT=28735733;ADJRIGHT=28736006	0/1:-66.5,-15.65,-234	0/0:-1.2,-13.25,-221	0/0:-1.81,-8.43,-133.81	0/0:-0.6,-10.24,-192.6	0/1:-19.9,-3.01,-36	0/1:-39.4,-11.44,-177.7	0/1:-42.4,-18.06,-308.3	0/1:-71.4,-17.46,-259.52	0/1:-103.2,-9.03,-72	0/0:-0.6,-11.44,-211.7	0/0:-0,-17.46,-347.8	1/1:-59.9,-3.01,-0	0/0:-1.2,-9.63,-164.4	0/0:-0,-10.84,-213.4	0/1:-105,-10.84,-97.7	0/0:-1.2,-6.62,-109.2	1/1:-56.7,-3.01,-0	0/0:-1.2,-4.21,-61.2	0/0:-0.6,-8.43,-154.8	1/1:-35.2,-1.81,-0	0/1:-60,-16.86,-274.2	1/1:-38.6,-2.41,-0.13	1/1:-78.2,-4.21,-0	0/1:-81.46,-15.05,-204	0/1:-48,-9.63,-141.1	0/0:-1.2,-4.82,-68.8	0/1:-53.3,-9.63,-132	0/0:-1.2,-9.03,-155.2	0/1:-128.5,-17.46,-214.6	0/1:-72,-7.22,-72	0/1:-102.4,-10.84,-106	0/0:-1.81,-12.64,-216.31	0/0:-1.81,-19.27,-347.81	0/0:-0,-10.24,-203.2	0/1:-36,-6.02,-84	0/0:-1.2,-4.82,-69.2	1/1:-75,-4.21,-0	0/0:-0,-3.61,-70.9	chr23	28956653	28956654	XR_814861.3	LOC101906691	+	220648
chr23	28735733	28736006	SVTYPE=Bov-A2;END=28736006;SVLEN=273;ADJLEFT=28735733;ADJRIGHT=28736006	0/1:-66.5,-15.65,-234	0/0:-1.2,-13.25,-221	0/0:-1.81,-8.43,-133.81	0/0:-0.6,-10.24,-192.6	0/1:-19.9,-3.01,-36	0/1:-39.4,-11.44,-177.7	0/1:-42.4,-18.06,-308.3	0/1:-71.4,-17.46,-259.52	0/1:-103.2,-9.03,-72	0/0:-0.6,-11.44,-211.7	0/0:-0,-17.46,-347.8	1/1:-59.9,-3.01,-0	0/0:-1.2,-9.63,-164.4	0/0:-0,-10.84,-213.4	0/1:-105,-10.84,-97.7	0/0:-1.2,-6.62,-109.2	1/1:-56.7,-3.01,-0	0/0:-1.2,-4.21,-61.2	0/0:-0.6,-8.43,-154.8	1/1:-35.2,-1.81,-0	0/1:-60,-16.86,-274.2	1/1:-38.6,-2.41,-0.13	1/1:-78.2,-4.21,-0	0/1:-81.46,-15.05,-204	0/1:-48,-9.63,-141.1	0/0:-1.2,-4.82,-68.8	0/1:-53.3,-9.63,-132	0/0:-1.2,-9.03,-155.2	0/1:-128.5,-17.46,-214.6	0/1:-72,-7.22,-72	0/1:-102.4,-10.84,-106	0/0:-1.81,-12.64,-216.31	0/0:-1.81,-19.27,-347.81	0/0:-0,-10.24,-203.2	0/1:-36,-6.02,-84	0/0:-1.2,-4.82,-69.2	1/1:-75,-4.21,-0	0/0:-0,-3.61,-70.9	chr23	28974392	28974393	NM_001163275.1	GABBR1	+	238387
chr23	28735733	28736006	SVTYPE=Bov-A2;END=28736006;SVLEN=273;ADJLEFT=28735733;ADJRIGHT=28736006	0/1:-66.5,-15.65,-234	0/0:-1.2,-13.25,-221	0/0:-1.81,-8.43,-133.81	0/0:-0.6,-10.24,-192.6	0/1:-19.9,-3.01,-36	0/1:-39.4,-11.44,-177.7	0/1:-42.4,-18.06,-308.3	0/1:-71.4,-17.46,-259.52	0/1:-103.2,-9.03,-72	0/0:-0.6,-11.44,-211.7	0/0:-0,-17.46,-347.8	1/1:-59.9,-3.01,-0	0/0:-1.2,-9.63,-164.4	0/0:-0,-10.84,-213.4	0/1:-105,-10.84,-97.7	0/0:-1.2,-6.62,-109.2	1/1:-56.7,-3.01,-0	0/0:-1.2,-4.21,-61.2	0/0:-0.6,-8.43,-154.8	1/1:-35.2,-1.81,-0	0/1:-60,-16.86,-274.2	1/1:-38.6,-2.41,-0.13	1/1:-78.2,-4.21,-0	0/1:-81.46,-15.05,-204	0/1:-48,-9.63,-141.1	0/0:-1.2,-4.82,-68.8	0/1:-53.3,-9.63,-132	0/0:-1.2,-9.03,-155.2	0/1:-128.5,-17.46,-214.6	0/1:-72,-7.22,-72	0/1:-102.4,-10.84,-106	0/0:-1.81,-12.64,-216.31	0/0:-1.81,-19.27,-347.81	0/0:-0,-10.24,-203.2	0/1:-36,-6.02,-84	0/0:-1.2,-4.82,-69.2	1/1:-75,-4.21,-0	0/0:-0,-3.61,-70.9	chr23	28489717	28489718	XR_814849.3	LOC104975665	-	246016
chr23	28831789	28832063	SVTYPE=Bov-A2;END=28832063;SVLEN=274;ADJLEFT=28831789;ADJRIGHT=28832063	0/0:-0,-18.66,-360.9	0/0:-0,-13.85,-250.4	0/0:-0,-10.84,-208.9	0/0:-0,-13.25,-258.8	0/0:-0,-9.03,-178	0/0:-0,-14.45,-278.6	0/0:-0,-8.43,-162	0/0:-0,-15.65,-304.5	0/0:-0,-12.04,-239.2	0/0:-0,-7.83,-140.7	0/0:-0,-11.44,-222.7	0/0:-2.41,-6.62,-78.31	0/1:-55.7,-8.43,-104	0/0:-0,-8.43,-164.6	0/0:-0,-9.03,-166.3	0/0:-0,-7.22,-127.6	0/0:-0.6,-6.62,-120.6	0/0:-0,-6.62,-131.9	0/0:-0,-11.44,-222.7	0/0:-1.2,-4.82,-71.4	0/0:-0,-10.24,-194.2	0/0:-0,-3.01,-53.3	0/0:-0,-11.44,-225.9	0/0:-0,-10.24,-182.3	0/0:-0.6,-4.82,-80.9	0/0:-0.12,-12.04,-213.2	0/0:-0,-13.25,-254.2	0/0:-0,-9.03,-180	0/0:-0,-7.83,-153.7	0/0:-0,-10.84,-216	0/0:-0,-10.84,-198.6	0/0:-0,-9.03,-177.3	0/0:-0,-11.44,-224.8	0/0:-0,-8.43,-166	0/0:-0,-13.85,-261.6	0/0:-0,-3.61,-70	0/0:-0,-4.21,-84	0/0:-0,-6.02,-116	chr23	28841507	28841508	NM_001103306.1	TRIM40	-	9445
chr23	28831789	28832063	SVTYPE=Bov-A2;END=28832063;SVLEN=274;ADJLEFT=28831789;ADJRIGHT=28832063	0/0:-0,-18.66,-360.9	0/0:-0,-13.85,-250.4	0/0:-0,-10.84,-208.9	0/0:-0,-13.25,-258.8	0/0:-0,-9.03,-178	0/0:-0,-14.45,-278.6	0/0:-0,-8.43,-162	0/0:-0,-15.65,-304.5	0/0:-0,-12.04,-239.2	0/0:-0,-7.83,-140.7	0/0:-0,-11.44,-222.7	0/0:-2.41,-6.62,-78.31	0/1:-55.7,-8.43,-104	0/0:-0,-8.43,-164.6	0/0:-0,-9.03,-166.3	0/0:-0,-7.22,-127.6	0/0:-0.6,-6.62,-120.6	0/0:-0,-6.62,-131.9	0/0:-0,-11.44,-222.7	0/0:-1.2,-4.82,-71.4	0/0:-0,-10.24,-194.2	0/0:-0,-3.01,-53.3	0/0:-0,-11.44,-225.9	0/0:-0,-10.24,-182.3	0/0:-0.6,-4.82,-80.9	0/0:-0.12,-12.04,-213.2	0/0:-0,-13.25,-254.2	0/0:-0,-9.03,-180	0/0:-0,-7.83,-153.7	0/0:-0,-10.84,-216	0/0:-0,-10.84,-198.6	0/0:-0,-9.03,-177.3	0/0:-0,-11.44,-224.8	0/0:-0,-8.43,-166	0/0:-0,-13.85,-261.6	0/0:-0,-3.61,-70	0/0:-0,-4.21,-84	0/0:-0,-6.02,-116	chr23	28816473	28816474	NM_001015607.1	TRIM10	+	15316
chr23	28831789	28832063	SVTYPE=Bov-A2;END=28832063;SVLEN=274;ADJLEFT=28831789;ADJRIGHT=28832063	0/0:-0,-18.66,-360.9	0/0:-0,-13.85,-250.4	0/0:-0,-10.84,-208.9	0/0:-0,-13.25,-258.8	0/0:-0,-9.03,-178	0/0:-0,-14.45,-278.6	0/0:-0,-8.43,-162	0/0:-0,-15.65,-304.5	0/0:-0,-12.04,-239.2	0/0:-0,-7.83,-140.7	0/0:-0,-11.44,-222.7	0/0:-2.41,-6.62,-78.31	0/1:-55.7,-8.43,-104	0/0:-0,-8.43,-164.6	0/0:-0,-9.03,-166.3	0/0:-0,-7.22,-127.6	0/0:-0.6,-6.62,-120.6	0/0:-0,-6.62,-131.9	0/0:-0,-11.44,-222.7	0/0:-1.2,-4.82,-71.4	0/0:-0,-10.24,-194.2	0/0:-0,-3.01,-53.3	0/0:-0,-11.44,-225.9	0/0:-0,-10.24,-182.3	0/0:-0.6,-4.82,-80.9	0/0:-0.12,-12.04,-213.2	0/0:-0,-13.25,-254.2	0/0:-0,-9.03,-180	0/0:-0,-7.83,-153.7	0/0:-0,-10.84,-216	0/0:-0,-10.84,-198.6	0/0:-0,-9.03,-177.3	0/0:-0,-11.44,-224.8	0/0:-0,-8.43,-166	0/0:-0,-13.85,-261.6	0/0:-0,-3.61,-70	0/0:-0,-4.21,-84	0/0:-0,-6.02,-116	chr23	28815061	28815062	XM_024983693.1	TRIM15	-	16728
chr23	28831789	28832063	SVTYPE=Bov-A2;END=28832063;SVLEN=274;ADJLEFT=28831789;ADJRIGHT=28832063	0/0:-0,-18.66,-360.9	0/0:-0,-13.85,-250.4	0/0:-0,-10.84,-208.9	0/0:-0,-13.25,-258.8	0/0:-0,-9.03,-178	0/0:-0,-14.45,-278.6	0/0:-0,-8.43,-162	0/0:-0,-15.65,-304.5	0/0:-0,-12.04,-239.2	0/0:-0,-7.83,-140.7	0/0:-0,-11.44,-222.7	0/0:-2.41,-6.62,-78.31	0/1:-55.7,-8.43,-104	0/0:-0,-8.43,-164.6	0/0:-0,-9.03,-166.3	0/0:-0,-7.22,-127.6	0/0:-0.6,-6.62,-120.6	0/0:-0,-6.62,-131.9	0/0:-0,-11.44,-222.7	0/0:-1.2,-4.82,-71.4	0/0:-0,-10.24,-194.2	0/0:-0,-3.01,-53.3	0/0:-0,-11.44,-225.9	0/0:-0,-10.24,-182.3	0/0:-0.6,-4.82,-80.9	0/0:-0.12,-12.04,-213.2	0/0:-0,-13.25,-254.2	0/0:-0,-9.03,-180	0/0:-0,-7.83,-153.7	0/0:-0,-10.84,-216	0/0:-0,-10.84,-198.6	0/0:-0,-9.03,-177.3	0/0:-0,-11.44,-224.8	0/0:-0,-8.43,-166	0/0:-0,-13.85,-261.6	0/0:-0,-3.61,-70	0/0:-0,-4.21,-84	0/0:-0,-6.02,-116	chr23	28853941	28853942	XM_024984035.1	TRIM31	+	21879
chr23	28831789	28832063	SVTYPE=Bov-A2;END=28832063;SVLEN=274;ADJLEFT=28831789;ADJRIGHT=28832063	0/0:-0,-18.66,-360.9	0/0:-0,-13.85,-250.4	0/0:-0,-10.84,-208.9	0/0:-0,-13.25,-258.8	0/0:-0,-9.03,-178	0/0:-0,-14.45,-278.6	0/0:-0,-8.43,-162	0/0:-0,-15.65,-304.5	0/0:-0,-12.04,-239.2	0/0:-0,-7.83,-140.7	0/0:-0,-11.44,-222.7	0/0:-2.41,-6.62,-78.31	0/1:-55.7,-8.43,-104	0/0:-0,-8.43,-164.6	0/0:-0,-9.03,-166.3	0/0:-0,-7.22,-127.6	0/0:-0.6,-6.62,-120.6	0/0:-0,-6.62,-131.9	0/0:-0,-11.44,-222.7	0/0:-1.2,-4.82,-71.4	0/0:-0,-10.24,-194.2	0/0:-0,-3.01,-53.3	0/0:-0,-11.44,-225.9	0/0:-0,-10.24,-182.3	0/0:-0.6,-4.82,-80.9	0/0:-0.12,-12.04,-213.2	0/0:-0,-13.25,-254.2	0/0:-0,-9.03,-180	0/0:-0,-7.83,-153.7	0/0:-0,-10.84,-216	0/0:-0,-10.84,-198.6	0/0:-0,-9.03,-177.3	0/0:-0,-11.44,-224.8	0/0:-0,-8.43,-166	0/0:-0,-13.85,-261.6	0/0:-0,-3.61,-70	0/0:-0,-4.21,-84	0/0:-0,-6.02,-116	chr23	28878785	28878786	XR_814859.3	LOC104975670	-	46723
chr23	28831789	28832063	SVTYPE=Bov-A2;END=28832063;SVLEN=274;ADJLEFT=28831789;ADJRIGHT=28832063	0/0:-0,-18.66,-360.9	0/0:-0,-13.85,-250.4	0/0:-0,-10.84,-208.9	0/0:-0,-13.25,-258.8	0/0:-0,-9.03,-178	0/0:-0,-14.45,-278.6	0/0:-0,-8.43,-162	0/0:-0,-15.65,-304.5	0/0:-0,-12.04,-239.2	0/0:-0,-7.83,-140.7	0/0:-0,-11.44,-222.7	0/0:-2.41,-6.62,-78.31	0/1:-55.7,-8.43,-104	0/0:-0,-8.43,-164.6	0/0:-0,-9.03,-166.3	0/0:-0,-7.22,-127.6	0/0:-0.6,-6.62,-120.6	0/0:-0,-6.62,-131.9	0/0:-0,-11.44,-222.7	0/0:-1.2,-4.82,-71.4	0/0:-0,-10.24,-194.2	0/0:-0,-3.01,-53.3	0/0:-0,-11.44,-225.9	0/0:-0,-10.24,-182.3	0/0:-0.6,-4.82,-80.9	0/0:-0.12,-12.04,-213.2	0/0:-0,-13.25,-254.2	0/0:-0,-9.03,-180	0/0:-0,-7.83,-153.7	0/0:-0,-10.84,-216	0/0:-0,-10.84,-198.6	0/0:-0,-9.03,-177.3	0/0:-0,-11.44,-224.8	0/0:-0,-8.43,-166	0/0:-0,-13.85,-261.6	0/0:-0,-3.61,-70	0/0:-0,-4.21,-84	0/0:-0,-6.02,-116	chr23	28769819	28769820	XM_002697339.6	LOC785873	+	61970
chr23	28831789	28832063	SVTYPE=Bov-A2;END=28832063;SVLEN=274;ADJLEFT=28831789;ADJRIGHT=28832063	0/0:-0,-18.66,-360.9	0/0:-0,-13.85,-250.4	0/0:-0,-10.84,-208.9	0/0:-0,-13.25,-258.8	0/0:-0,-9.03,-178	0/0:-0,-14.45,-278.6	0/0:-0,-8.43,-162	0/0:-0,-15.65,-304.5	0/0:-0,-12.04,-239.2	0/0:-0,-7.83,-140.7	0/0:-0,-11.44,-222.7	0/0:-2.41,-6.62,-78.31	0/1:-55.7,-8.43,-104	0/0:-0,-8.43,-164.6	0/0:-0,-9.03,-166.3	0/0:-0,-7.22,-127.6	0/0:-0.6,-6.62,-120.6	0/0:-0,-6.62,-131.9	0/0:-0,-11.44,-222.7	0/0:-1.2,-4.82,-71.4	0/0:-0,-10.24,-194.2	0/0:-0,-3.01,-53.3	0/0:-0,-11.44,-225.9	0/0:-0,-10.24,-182.3	0/0:-0.6,-4.82,-80.9	0/0:-0.12,-12.04,-213.2	0/0:-0,-13.25,-254.2	0/0:-0,-9.03,-180	0/0:-0,-7.83,-153.7	0/0:-0,-10.84,-216	0/0:-0,-10.84,-198.6	0/0:-0,-9.03,-177.3	0/0:-0,-11.44,-224.8	0/0:-0,-8.43,-166	0/0:-0,-13.85,-261.6	0/0:-0,-3.61,-70	0/0:-0,-4.21,-84	0/0:-0,-6.02,-116	chr23	28904297	28904298	XM_003587705.5	RNF39	+	72235
chr23	28831789	28832063	SVTYPE=Bov-A2;END=28832063;SVLEN=274;ADJLEFT=28831789;ADJRIGHT=28832063	0/0:-0,-18.66,-360.9	0/0:-0,-13.85,-250.4	0/0:-0,-10.84,-208.9	0/0:-0,-13.25,-258.8	0/0:-0,-9.03,-178	0/0:-0,-14.45,-278.6	0/0:-0,-8.43,-162	0/0:-0,-15.65,-304.5	0/0:-0,-12.04,-239.2	0/0:-0,-7.83,-140.7	0/0:-0,-11.44,-222.7	0/0:-2.41,-6.62,-78.31	0/1:-55.7,-8.43,-104	0/0:-0,-8.43,-164.6	0/0:-0,-9.03,-166.3	0/0:-0,-7.22,-127.6	0/0:-0.6,-6.62,-120.6	0/0:-0,-6.62,-131.9	0/0:-0,-11.44,-222.7	0/0:-1.2,-4.82,-71.4	0/0:-0,-10.24,-194.2	0/0:-0,-3.01,-53.3	0/0:-0,-11.44,-225.9	0/0:-0,-10.24,-182.3	0/0:-0.6,-4.82,-80.9	0/0:-0.12,-12.04,-213.2	0/0:-0,-13.25,-254.2	0/0:-0,-9.03,-180	0/0:-0,-7.83,-153.7	0/0:-0,-10.84,-216	0/0:-0,-10.84,-198.6	0/0:-0,-9.03,-177.3	0/0:-0,-11.44,-224.8	0/0:-0,-8.43,-166	0/0:-0,-13.85,-261.6	0/0:-0,-3.61,-70	0/0:-0,-4.21,-84	0/0:-0,-6.02,-116	chr23	28913054	28913055	NM_001100295.2	PPP1R11	-	80992
chr23	28831789	28832063	SVTYPE=Bov-A2;END=28832063;SVLEN=274;ADJLEFT=28831789;ADJRIGHT=28832063	0/0:-0,-18.66,-360.9	0/0:-0,-13.85,-250.4	0/0:-0,-10.84,-208.9	0/0:-0,-13.25,-258.8	0/0:-0,-9.03,-178	0/0:-0,-14.45,-278.6	0/0:-0,-8.43,-162	0/0:-0,-15.65,-304.5	0/0:-0,-12.04,-239.2	0/0:-0,-7.83,-140.7	0/0:-0,-11.44,-222.7	0/0:-2.41,-6.62,-78.31	0/1:-55.7,-8.43,-104	0/0:-0,-8.43,-164.6	0/0:-0,-9.03,-166.3	0/0:-0,-7.22,-127.6	0/0:-0.6,-6.62,-120.6	0/0:-0,-6.62,-131.9	0/0:-0,-11.44,-222.7	0/0:-1.2,-4.82,-71.4	0/0:-0,-10.24,-194.2	0/0:-0,-3.01,-53.3	0/0:-0,-11.44,-225.9	0/0:-0,-10.24,-182.3	0/0:-0.6,-4.82,-80.9	0/0:-0.12,-12.04,-213.2	0/0:-0,-13.25,-254.2	0/0:-0,-9.03,-180	0/0:-0,-7.83,-153.7	0/0:-0,-10.84,-216	0/0:-0,-10.84,-198.6	0/0:-0,-9.03,-177.3	0/0:-0,-11.44,-224.8	0/0:-0,-8.43,-166	0/0:-0,-13.85,-261.6	0/0:-0,-3.61,-70	0/0:-0,-4.21,-84	0/0:-0,-6.02,-116	chr23	28920588	28920589	XR_003032249.1	LOC101907137	+	88526
chr23	28831789	28832063	SVTYPE=Bov-A2;END=28832063;SVLEN=274;ADJLEFT=28831789;ADJRIGHT=28832063	0/0:-0,-18.66,-360.9	0/0:-0,-13.85,-250.4	0/0:-0,-10.84,-208.9	0/0:-0,-13.25,-258.8	0/0:-0,-9.03,-178	0/0:-0,-14.45,-278.6	0/0:-0,-8.43,-162	0/0:-0,-15.65,-304.5	0/0:-0,-12.04,-239.2	0/0:-0,-7.83,-140.7	0/0:-0,-11.44,-222.7	0/0:-2.41,-6.62,-78.31	0/1:-55.7,-8.43,-104	0/0:-0,-8.43,-164.6	0/0:-0,-9.03,-166.3	0/0:-0,-7.22,-127.6	0/0:-0.6,-6.62,-120.6	0/0:-0,-6.62,-131.9	0/0:-0,-11.44,-222.7	0/0:-1.2,-4.82,-71.4	0/0:-0,-10.24,-194.2	0/0:-0,-3.01,-53.3	0/0:-0,-11.44,-225.9	0/0:-0,-10.24,-182.3	0/0:-0.6,-4.82,-80.9	0/0:-0.12,-12.04,-213.2	0/0:-0,-13.25,-254.2	0/0:-0,-9.03,-180	0/0:-0,-7.83,-153.7	0/0:-0,-10.84,-216	0/0:-0,-10.84,-198.6	0/0:-0,-9.03,-177.3	0/0:-0,-11.44,-224.8	0/0:-0,-8.43,-166	0/0:-0,-13.85,-261.6	0/0:-0,-3.61,-70	0/0:-0,-4.21,-84	0/0:-0,-6.02,-116	chr23	28920654	28920655	XM_005223666.4	ZNRD1	-	88592
chr23	28831789	28832063	SVTYPE=Bov-A2;END=28832063;SVLEN=274;ADJLEFT=28831789;ADJRIGHT=28832063	0/0:-0,-18.66,-360.9	0/0:-0,-13.85,-250.4	0/0:-0,-10.84,-208.9	0/0:-0,-13.25,-258.8	0/0:-0,-9.03,-178	0/0:-0,-14.45,-278.6	0/0:-0,-8.43,-162	0/0:-0,-15.65,-304.5	0/0:-0,-12.04,-239.2	0/0:-0,-7.83,-140.7	0/0:-0,-11.44,-222.7	0/0:-2.41,-6.62,-78.31	0/1:-55.7,-8.43,-104	0/0:-0,-8.43,-164.6	0/0:-0,-9.03,-166.3	0/0:-0,-7.22,-127.6	0/0:-0.6,-6.62,-120.6	0/0:-0,-6.62,-131.9	0/0:-0,-11.44,-222.7	0/0:-1.2,-4.82,-71.4	0/0:-0,-10.24,-194.2	0/0:-0,-3.01,-53.3	0/0:-0,-11.44,-225.9	0/0:-0,-10.24,-182.3	0/0:-0.6,-4.82,-80.9	0/0:-0.12,-12.04,-213.2	0/0:-0,-13.25,-254.2	0/0:-0,-9.03,-180	0/0:-0,-7.83,-153.7	0/0:-0,-10.84,-216	0/0:-0,-10.84,-198.6	0/0:-0,-9.03,-177.3	0/0:-0,-11.44,-224.8	0/0:-0,-8.43,-166	0/0:-0,-13.85,-261.6	0/0:-0,-3.61,-70	0/0:-0,-4.21,-84	0/0:-0,-6.02,-116	chr23	28732803	28732804	XR_003032215.1	LOC112443819	+	98986
chr23	28831789	28832063	SVTYPE=Bov-A2;END=28832063;SVLEN=274;ADJLEFT=28831789;ADJRIGHT=28832063	0/0:-0,-18.66,-360.9	0/0:-0,-13.85,-250.4	0/0:-0,-10.84,-208.9	0/0:-0,-13.25,-258.8	0/0:-0,-9.03,-178	0/0:-0,-14.45,-278.6	0/0:-0,-8.43,-162	0/0:-0,-15.65,-304.5	0/0:-0,-12.04,-239.2	0/0:-0,-7.83,-140.7	0/0:-0,-11.44,-222.7	0/0:-2.41,-6.62,-78.31	0/1:-55.7,-8.43,-104	0/0:-0,-8.43,-164.6	0/0:-0,-9.03,-166.3	0/0:-0,-7.22,-127.6	0/0:-0.6,-6.62,-120.6	0/0:-0,-6.62,-131.9	0/0:-0,-11.44,-222.7	0/0:-1.2,-4.82,-71.4	0/0:-0,-10.24,-194.2	0/0:-0,-3.01,-53.3	0/0:-0,-11.44,-225.9	0/0:-0,-10.24,-182.3	0/0:-0.6,-4.82,-80.9	0/0:-0.12,-12.04,-213.2	0/0:-0,-13.25,-254.2	0/0:-0,-9.03,-180	0/0:-0,-7.83,-153.7	0/0:-0,-10.84,-216	0/0:-0,-10.84,-198.6	0/0:-0,-9.03,-177.3	0/0:-0,-11.44,-224.8	0/0:-0,-8.43,-166	0/0:-0,-13.85,-261.6	0/0:-0,-3.61,-70	0/0:-0,-4.21,-84	0/0:-0,-6.02,-116	chr23	28936965	28936966	XM_010818393.3	ZFP57	+	104903
chr23	28831789	28832063	SVTYPE=Bov-A2;END=28832063;SVLEN=274;ADJLEFT=28831789;ADJRIGHT=28832063	0/0:-0,-18.66,-360.9	0/0:-0,-13.85,-250.4	0/0:-0,-10.84,-208.9	0/0:-0,-13.25,-258.8	0/0:-0,-9.03,-178	0/0:-0,-14.45,-278.6	0/0:-0,-8.43,-162	0/0:-0,-15.65,-304.5	0/0:-0,-12.04,-239.2	0/0:-0,-7.83,-140.7	0/0:-0,-11.44,-222.7	0/0:-2.41,-6.62,-78.31	0/1:-55.7,-8.43,-104	0/0:-0,-8.43,-164.6	0/0:-0,-9.03,-166.3	0/0:-0,-7.22,-127.6	0/0:-0.6,-6.62,-120.6	0/0:-0,-6.62,-131.9	0/0:-0,-11.44,-222.7	0/0:-1.2,-4.82,-71.4	0/0:-0,-10.24,-194.2	0/0:-0,-3.01,-53.3	0/0:-0,-11.44,-225.9	0/0:-0,-10.24,-182.3	0/0:-0.6,-4.82,-80.9	0/0:-0.12,-12.04,-213.2	0/0:-0,-13.25,-254.2	0/0:-0,-9.03,-180	0/0:-0,-7.83,-153.7	0/0:-0,-10.84,-216	0/0:-0,-10.84,-198.6	0/0:-0,-9.03,-177.3	0/0:-0,-11.44,-224.8	0/0:-0,-8.43,-166	0/0:-0,-13.85,-261.6	0/0:-0,-3.61,-70	0/0:-0,-4.21,-84	0/0:-0,-6.02,-116	chr23	28724352	28724353	XM_010818341.3	BOLA	-	107437
chr23	28831789	28832063	SVTYPE=Bov-A2;END=28832063;SVLEN=274;ADJLEFT=28831789;ADJRIGHT=28832063	0/0:-0,-18.66,-360.9	0/0:-0,-13.85,-250.4	0/0:-0,-10.84,-208.9	0/0:-0,-13.25,-258.8	0/0:-0,-9.03,-178	0/0:-0,-14.45,-278.6	0/0:-0,-8.43,-162	0/0:-0,-15.65,-304.5	0/0:-0,-12.04,-239.2	0/0:-0,-7.83,-140.7	0/0:-0,-11.44,-222.7	0/0:-2.41,-6.62,-78.31	0/1:-55.7,-8.43,-104	0/0:-0,-8.43,-164.6	0/0:-0,-9.03,-166.3	0/0:-0,-7.22,-127.6	0/0:-0.6,-6.62,-120.6	0/0:-0,-6.62,-131.9	0/0:-0,-11.44,-222.7	0/0:-1.2,-4.82,-71.4	0/0:-0,-10.24,-194.2	0/0:-0,-3.01,-53.3	0/0:-0,-11.44,-225.9	0/0:-0,-10.24,-182.3	0/0:-0.6,-4.82,-80.9	0/0:-0.12,-12.04,-213.2	0/0:-0,-13.25,-254.2	0/0:-0,-9.03,-180	0/0:-0,-7.83,-153.7	0/0:-0,-10.84,-216	0/0:-0,-10.84,-198.6	0/0:-0,-9.03,-177.3	0/0:-0,-11.44,-224.8	0/0:-0,-8.43,-166	0/0:-0,-13.85,-261.6	0/0:-0,-3.61,-70	0/0:-0,-4.21,-84	0/0:-0,-6.02,-116	chr23	28956143	28956144	XM_005223595.4	MOG	-	124081
chr23	28831789	28832063	SVTYPE=Bov-A2;END=28832063;SVLEN=274;ADJLEFT=28831789;ADJRIGHT=28832063	0/0:-0,-18.66,-360.9	0/0:-0,-13.85,-250.4	0/0:-0,-10.84,-208.9	0/0:-0,-13.25,-258.8	0/0:-0,-9.03,-178	0/0:-0,-14.45,-278.6	0/0:-0,-8.43,-162	0/0:-0,-15.65,-304.5	0/0:-0,-12.04,-239.2	0/0:-0,-7.83,-140.7	0/0:-0,-11.44,-222.7	0/0:-2.41,-6.62,-78.31	0/1:-55.7,-8.43,-104	0/0:-0,-8.43,-164.6	0/0:-0,-9.03,-166.3	0/0:-0,-7.22,-127.6	0/0:-0.6,-6.62,-120.6	0/0:-0,-6.62,-131.9	0/0:-0,-11.44,-222.7	0/0:-1.2,-4.82,-71.4	0/0:-0,-10.24,-194.2	0/0:-0,-3.01,-53.3	0/0:-0,-11.44,-225.9	0/0:-0,-10.24,-182.3	0/0:-0.6,-4.82,-80.9	0/0:-0.12,-12.04,-213.2	0/0:-0,-13.25,-254.2	0/0:-0,-9.03,-180	0/0:-0,-7.83,-153.7	0/0:-0,-10.84,-216	0/0:-0,-10.84,-198.6	0/0:-0,-9.03,-177.3	0/0:-0,-11.44,-224.8	0/0:-0,-8.43,-166	0/0:-0,-13.85,-261.6	0/0:-0,-3.61,-70	0/0:-0,-4.21,-84	0/0:-0,-6.02,-116	chr23	28956653	28956654	XR_814861.3	LOC101906691	+	124591
chr23	28831789	28832063	SVTYPE=Bov-A2;END=28832063;SVLEN=274;ADJLEFT=28831789;ADJRIGHT=28832063	0/0:-0,-18.66,-360.9	0/0:-0,-13.85,-250.4	0/0:-0,-10.84,-208.9	0/0:-0,-13.25,-258.8	0/0:-0,-9.03,-178	0/0:-0,-14.45,-278.6	0/0:-0,-8.43,-162	0/0:-0,-15.65,-304.5	0/0:-0,-12.04,-239.2	0/0:-0,-7.83,-140.7	0/0:-0,-11.44,-222.7	0/0:-2.41,-6.62,-78.31	0/1:-55.7,-8.43,-104	0/0:-0,-8.43,-164.6	0/0:-0,-9.03,-166.3	0/0:-0,-7.22,-127.6	0/0:-0.6,-6.62,-120.6	0/0:-0,-6.62,-131.9	0/0:-0,-11.44,-222.7	0/0:-1.2,-4.82,-71.4	0/0:-0,-10.24,-194.2	0/0:-0,-3.01,-53.3	0/0:-0,-11.44,-225.9	0/0:-0,-10.24,-182.3	0/0:-0.6,-4.82,-80.9	0/0:-0.12,-12.04,-213.2	0/0:-0,-13.25,-254.2	0/0:-0,-9.03,-180	0/0:-0,-7.83,-153.7	0/0:-0,-10.84,-216	0/0:-0,-10.84,-198.6	0/0:-0,-9.03,-177.3	0/0:-0,-11.44,-224.8	0/0:-0,-8.43,-166	0/0:-0,-13.85,-261.6	0/0:-0,-3.61,-70	0/0:-0,-4.21,-84	0/0:-0,-6.02,-116	chr23	28974392	28974393	NM_001163275.1	GABBR1	+	142330
chr23	28831789	28832063	SVTYPE=Bov-A2;END=28832063;SVLEN=274;ADJLEFT=28831789;ADJRIGHT=28832063	0/0:-0,-18.66,-360.9	0/0:-0,-13.85,-250.4	0/0:-0,-10.84,-208.9	0/0:-0,-13.25,-258.8	0/0:-0,-9.03,-178	0/0:-0,-14.45,-278.6	0/0:-0,-8.43,-162	0/0:-0,-15.65,-304.5	0/0:-0,-12.04,-239.2	0/0:-0,-7.83,-140.7	0/0:-0,-11.44,-222.7	0/0:-2.41,-6.62,-78.31	0/1:-55.7,-8.43,-104	0/0:-0,-8.43,-164.6	0/0:-0,-9.03,-166.3	0/0:-0,-7.22,-127.6	0/0:-0.6,-6.62,-120.6	0/0:-0,-6.62,-131.9	0/0:-0,-11.44,-222.7	0/0:-1.2,-4.82,-71.4	0/0:-0,-10.24,-194.2	0/0:-0,-3.01,-53.3	0/0:-0,-11.44,-225.9	0/0:-0,-10.24,-182.3	0/0:-0.6,-4.82,-80.9	0/0:-0.12,-12.04,-213.2	0/0:-0,-13.25,-254.2	0/0:-0,-9.03,-180	0/0:-0,-7.83,-153.7	0/0:-0,-10.84,-216	0/0:-0,-10.84,-198.6	0/0:-0,-9.03,-177.3	0/0:-0,-11.44,-224.8	0/0:-0,-8.43,-166	0/0:-0,-13.85,-261.6	0/0:-0,-3.61,-70	0/0:-0,-4.21,-84	0/0:-0,-6.02,-116	chr23	28667461	28667462	XM_024983412.1	JSP.1	-	164328
chr23	28831789	28832063	SVTYPE=Bov-A2;END=28832063;SVLEN=274;ADJLEFT=28831789;ADJRIGHT=28832063	0/0:-0,-18.66,-360.9	0/0:-0,-13.85,-250.4	0/0:-0,-10.84,-208.9	0/0:-0,-13.25,-258.8	0/0:-0,-9.03,-178	0/0:-0,-14.45,-278.6	0/0:-0,-8.43,-162	0/0:-0,-15.65,-304.5	0/0:-0,-12.04,-239.2	0/0:-0,-7.83,-140.7	0/0:-0,-11.44,-222.7	0/0:-2.41,-6.62,-78.31	0/1:-55.7,-8.43,-104	0/0:-0,-8.43,-164.6	0/0:-0,-9.03,-166.3	0/0:-0,-7.22,-127.6	0/0:-0.6,-6.62,-120.6	0/0:-0,-6.62,-131.9	0/0:-0,-11.44,-222.7	0/0:-1.2,-4.82,-71.4	0/0:-0,-10.24,-194.2	0/0:-0,-3.01,-53.3	0/0:-0,-11.44,-225.9	0/0:-0,-10.24,-182.3	0/0:-0.6,-4.82,-80.9	0/0:-0.12,-12.04,-213.2	0/0:-0,-13.25,-254.2	0/0:-0,-9.03,-180	0/0:-0,-7.83,-153.7	0/0:-0,-10.84,-216	0/0:-0,-10.84,-198.6	0/0:-0,-9.03,-177.3	0/0:-0,-11.44,-224.8	0/0:-0,-8.43,-166	0/0:-0,-13.85,-261.6	0/0:-0,-3.61,-70	0/0:-0,-4.21,-84	0/0:-0,-6.02,-116	chr23	29011186	29011187	XM_024984057.1	LOC112443846	+	179124
chr23	28831789	28832063	SVTYPE=Bov-A2;END=28832063;SVLEN=274;ADJLEFT=28831789;ADJRIGHT=28832063	0/0:-0,-18.66,-360.9	0/0:-0,-13.85,-250.4	0/0:-0,-10.84,-208.9	0/0:-0,-13.25,-258.8	0/0:-0,-9.03,-178	0/0:-0,-14.45,-278.6	0/0:-0,-8.43,-162	0/0:-0,-15.65,-304.5	0/0:-0,-12.04,-239.2	0/0:-0,-7.83,-140.7	0/0:-0,-11.44,-222.7	0/0:-2.41,-6.62,-78.31	0/1:-55.7,-8.43,-104	0/0:-0,-8.43,-164.6	0/0:-0,-9.03,-166.3	0/0:-0,-7.22,-127.6	0/0:-0.6,-6.62,-120.6	0/0:-0,-6.62,-131.9	0/0:-0,-11.44,-222.7	0/0:-1.2,-4.82,-71.4	0/0:-0,-10.24,-194.2	0/0:-0,-3.01,-53.3	0/0:-0,-11.44,-225.9	0/0:-0,-10.24,-182.3	0/0:-0.6,-4.82,-80.9	0/0:-0.12,-12.04,-213.2	0/0:-0,-13.25,-254.2	0/0:-0,-9.03,-180	0/0:-0,-7.83,-153.7	0/0:-0,-10.84,-216	0/0:-0,-10.84,-198.6	0/0:-0,-9.03,-177.3	0/0:-0,-11.44,-224.8	0/0:-0,-8.43,-166	0/0:-0,-13.85,-261.6	0/0:-0,-3.61,-70	0/0:-0,-4.21,-84	0/0:-0,-6.02,-116	chr23	28631369	28631370	XR_814853.3	LOC104975666	+	200420
chr23	28831789	28832063	SVTYPE=Bov-A2;END=28832063;SVLEN=274;ADJLEFT=28831789;ADJRIGHT=28832063	0/0:-0,-18.66,-360.9	0/0:-0,-13.85,-250.4	0/0:-0,-10.84,-208.9	0/0:-0,-13.25,-258.8	0/0:-0,-9.03,-178	0/0:-0,-14.45,-278.6	0/0:-0,-8.43,-162	0/0:-0,-15.65,-304.5	0/0:-0,-12.04,-239.2	0/0:-0,-7.83,-140.7	0/0:-0,-11.44,-222.7	0/0:-2.41,-6.62,-78.31	0/1:-55.7,-8.43,-104	0/0:-0,-8.43,-164.6	0/0:-0,-9.03,-166.3	0/0:-0,-7.22,-127.6	0/0:-0.6,-6.62,-120.6	0/0:-0,-6.62,-131.9	0/0:-0,-11.44,-222.7	0/0:-1.2,-4.82,-71.4	0/0:-0,-10.24,-194.2	0/0:-0,-3.01,-53.3	0/0:-0,-11.44,-225.9	0/0:-0,-10.24,-182.3	0/0:-0.6,-4.82,-80.9	0/0:-0.12,-12.04,-213.2	0/0:-0,-13.25,-254.2	0/0:-0,-9.03,-180	0/0:-0,-7.83,-153.7	0/0:-0,-10.84,-216	0/0:-0,-10.84,-198.6	0/0:-0,-9.03,-177.3	0/0:-0,-11.44,-224.8	0/0:-0,-8.43,-166	0/0:-0,-13.85,-261.6	0/0:-0,-3.61,-70	0/0:-0,-4.21,-84	0/0:-0,-6.02,-116	chr23	29055098	29055099	XM_024983904.1	LOC112441522	-	223036
chr23	28831789	28832063	SVTYPE=Bov-A2;END=28832063;SVLEN=274;ADJLEFT=28831789;ADJRIGHT=28832063	0/0:-0,-18.66,-360.9	0/0:-0,-13.85,-250.4	0/0:-0,-10.84,-208.9	0/0:-0,-13.25,-258.8	0/0:-0,-9.03,-178	0/0:-0,-14.45,-278.6	0/0:-0,-8.43,-162	0/0:-0,-15.65,-304.5	0/0:-0,-12.04,-239.2	0/0:-0,-7.83,-140.7	0/0:-0,-11.44,-222.7	0/0:-2.41,-6.62,-78.31	0/1:-55.7,-8.43,-104	0/0:-0,-8.43,-164.6	0/0:-0,-9.03,-166.3	0/0:-0,-7.22,-127.6	0/0:-0.6,-6.62,-120.6	0/0:-0,-6.62,-131.9	0/0:-0,-11.44,-222.7	0/0:-1.2,-4.82,-71.4	0/0:-0,-10.24,-194.2	0/0:-0,-3.01,-53.3	0/0:-0,-11.44,-225.9	0/0:-0,-10.24,-182.3	0/0:-0.6,-4.82,-80.9	0/0:-0.12,-12.04,-213.2	0/0:-0,-13.25,-254.2	0/0:-0,-9.03,-180	0/0:-0,-7.83,-153.7	0/0:-0,-10.84,-216	0/0:-0,-10.84,-198.6	0/0:-0,-9.03,-177.3	0/0:-0,-11.44,-224.8	0/0:-0,-8.43,-166	0/0:-0,-13.85,-261.6	0/0:-0,-3.61,-70	0/0:-0,-4.21,-84	0/0:-0,-6.02,-116	chr23	29069535	29069536	XM_024984042.1	LOC786987	-	237473
chr23	28831789	28832063	SVTYPE=Bov-A2;END=28832063;SVLEN=274;ADJLEFT=28831789;ADJRIGHT=28832063	0/0:-0,-18.66,-360.9	0/0:-0,-13.85,-250.4	0/0:-0,-10.84,-208.9	0/0:-0,-13.25,-258.8	0/0:-0,-9.03,-178	0/0:-0,-14.45,-278.6	0/0:-0,-8.43,-162	0/0:-0,-15.65,-304.5	0/0:-0,-12.04,-239.2	0/0:-0,-7.83,-140.7	0/0:-0,-11.44,-222.7	0/0:-2.41,-6.62,-78.31	0/1:-55.7,-8.43,-104	0/0:-0,-8.43,-164.6	0/0:-0,-9.03,-166.3	0/0:-0,-7.22,-127.6	0/0:-0.6,-6.62,-120.6	0/0:-0,-6.62,-131.9	0/0:-0,-11.44,-222.7	0/0:-1.2,-4.82,-71.4	0/0:-0,-10.24,-194.2	0/0:-0,-3.01,-53.3	0/0:-0,-11.44,-225.9	0/0:-0,-10.24,-182.3	0/0:-0.6,-4.82,-80.9	0/0:-0.12,-12.04,-213.2	0/0:-0,-13.25,-254.2	0/0:-0,-9.03,-180	0/0:-0,-7.83,-153.7	0/0:-0,-10.84,-216	0/0:-0,-10.84,-198.6	0/0:-0,-9.03,-177.3	0/0:-0,-11.44,-224.8	0/0:-0,-8.43,-166	0/0:-0,-13.85,-261.6	0/0:-0,-3.61,-70	0/0:-0,-4.21,-84	0/0:-0,-6.02,-116	chr23	29074858	29074859	XM_002697377.3	LOC504548	-	242796
chr28	14003130	14003410	SVTYPE=Bov-A2;END=14003410;SVLEN=280;ADJLEFT=14003130;ADJRIGHT=14003410	0/0:-0,-14.45,-288	0/1:-72,-12.64,-175.9	0/0:-0,-10.84,-216	0/1:-36,-6.62,-94.3	0/0:-0,-15.05,-297.1	0/0:-0,-13.85,-275.2	0/0:-0,-9.63,-191.8	0/0:-0,-12.04,-240	0/0:-0,-18.66,-368.6	0/0:-0,-7.83,-156	0/0:-0,-15.65,-311.6	0/1:-84,-6.02,-36	0/0:-0,-12.04,-235.2	0/0:-0,-14.45,-284.7	0/0:-0,-13.25,-248	0/0:-0,-5.42,-104.2	0/0:-0,-7.83,-156	0/0:-0,-8.43,-168	0/0:-0,-14.45,-288	0/0:-0,-12.04,-240	0/0:-0,-10.84,-215.8	0/0:-0,-6.02,-110.8	0/0:-0.6,-6.62,-120.6	0/1:-58.3,-4.21,-24	0/0:-0,-6.02,-120	0/0:-0,-12.04,-235.1	0/0:-0,-15.65,-311.2	0/0:-0,-12.04,-240	0/1:-72,-14.45,-211.4	0/0:-0,-13.85,-275.2	0/0:-0,-10.84,-206.2	0/0:-0,-13.85,-274.8	0/0:-0,-6.62,-132	0/0:-0,-10.84,-214.9	0/0:-0,-12.64,-252	0/0:-0,-7.22,-142.3	0/0:-1.2,-7.83,-133.2	0/0:-0,-9.63,-192	chr28	13971461	13971462	XM_024986879.1	BICC1	+	31669
chr28	14003130	14003410	SVTYPE=Bov-A2;END=14003410;SVLEN=280;ADJLEFT=14003130;ADJRIGHT=14003410	0/0:-0,-14.45,-288	0/1:-72,-12.64,-175.9	0/0:-0,-10.84,-216	0/1:-36,-6.62,-94.3	0/0:-0,-15.05,-297.1	0/0:-0,-13.85,-275.2	0/0:-0,-9.63,-191.8	0/0:-0,-12.04,-240	0/0:-0,-18.66,-368.6	0/0:-0,-7.83,-156	0/0:-0,-15.65,-311.6	0/1:-84,-6.02,-36	0/0:-0,-12.04,-235.2	0/0:-0,-14.45,-284.7	0/0:-0,-13.25,-248	0/0:-0,-5.42,-104.2	0/0:-0,-7.83,-156	0/0:-0,-8.43,-168	0/0:-0,-14.45,-288	0/0:-0,-12.04,-240	0/0:-0,-10.84,-215.8	0/0:-0,-6.02,-110.8	0/0:-0.6,-6.62,-120.6	0/1:-58.3,-4.21,-24	0/0:-0,-6.02,-120	0/0:-0,-12.04,-235.1	0/0:-0,-15.65,-311.2	0/0:-0,-12.04,-240	0/1:-72,-14.45,-211.4	0/0:-0,-13.85,-275.2	0/0:-0,-10.84,-206.2	0/0:-0,-13.85,-274.8	0/0:-0,-6.62,-132	0/0:-0,-10.84,-214.9	0/0:-0,-12.64,-252	0/0:-0,-7.22,-142.3	0/0:-1.2,-7.83,-133.2	0/0:-0,-9.63,-192	chr28	14134053	14134054	XM_024986880.1	LOC112444745	+	130644
chr28	14003130	14003410	SVTYPE=Bov-A2;END=14003410;SVLEN=280;ADJLEFT=14003130;ADJRIGHT=14003410	0/0:-0,-14.45,-288	0/1:-72,-12.64,-175.9	0/0:-0,-10.84,-216	0/1:-36,-6.62,-94.3	0/0:-0,-15.05,-297.1	0/0:-0,-13.85,-275.2	0/0:-0,-9.63,-191.8	0/0:-0,-12.04,-240	0/0:-0,-18.66,-368.6	0/0:-0,-7.83,-156	0/0:-0,-15.65,-311.6	0/1:-84,-6.02,-36	0/0:-0,-12.04,-235.2	0/0:-0,-14.45,-284.7	0/0:-0,-13.25,-248	0/0:-0,-5.42,-104.2	0/0:-0,-7.83,-156	0/0:-0,-8.43,-168	0/0:-0,-14.45,-288	0/0:-0,-12.04,-240	0/0:-0,-10.84,-215.8	0/0:-0,-6.02,-110.8	0/0:-0.6,-6.62,-120.6	0/1:-58.3,-4.21,-24	0/0:-0,-6.02,-120	0/0:-0,-12.04,-235.1	0/0:-0,-15.65,-311.2	0/0:-0,-12.04,-240	0/1:-72,-14.45,-211.4	0/0:-0,-13.85,-275.2	0/0:-0,-10.84,-206.2	0/0:-0,-13.85,-274.8	0/0:-0,-6.62,-132	0/0:-0,-10.84,-214.9	0/0:-0,-12.64,-252	0/0:-0,-7.22,-142.3	0/0:-1.2,-7.83,-133.2	0/0:-0,-9.63,-192	chr28	13848747	13848748	XR_240453.4	LOC101905963	+	154383
chr28	14003130	14003410	SVTYPE=Bov-A2;END=14003410;SVLEN=280;ADJLEFT=14003130;ADJRIGHT=14003410	0/0:-0,-14.45,-288	0/1:-72,-12.64,-175.9	0/0:-0,-10.84,-216	0/1:-36,-6.62,-94.3	0/0:-0,-15.05,-297.1	0/0:-0,-13.85,-275.2	0/0:-0,-9.63,-191.8	0/0:-0,-12.04,-240	0/0:-0,-18.66,-368.6	0/0:-0,-7.83,-156	0/0:-0,-15.65,-311.6	0/1:-84,-6.02,-36	0/0:-0,-12.04,-235.2	0/0:-0,-14.45,-284.7	0/0:-0,-13.25,-248	0/0:-0,-5.42,-104.2	0/0:-0,-7.83,-156	0/0:-0,-8.43,-168	0/0:-0,-14.45,-288	0/0:-0,-12.04,-240	0/0:-0,-10.84,-215.8	0/0:-0,-6.02,-110.8	0/0:-0.6,-6.62,-120.6	0/1:-58.3,-4.21,-24	0/0:-0,-6.02,-120	0/0:-0,-12.04,-235.1	0/0:-0,-15.65,-311.2	0/0:-0,-12.04,-240	0/1:-72,-14.45,-211.4	0/0:-0,-13.85,-275.2	0/0:-0,-10.84,-206.2	0/0:-0,-13.85,-274.8	0/0:-0,-6.62,-132	0/0:-0,-10.84,-214.9	0/0:-0,-12.64,-252	0/0:-0,-7.22,-142.3	0/0:-1.2,-7.83,-133.2	0/0:-0,-9.63,-192	chr28	13822433	13822434	XM_024986619.1	HNRNPF	-	180697
chr28	14003130	14003410	SVTYPE=Bov-A2;END=14003410;SVLEN=280;ADJLEFT=14003130;ADJRIGHT=14003410	0/0:-0,-14.45,-288	0/1:-72,-12.64,-175.9	0/0:-0,-10.84,-216	0/1:-36,-6.62,-94.3	0/0:-0,-15.05,-297.1	0/0:-0,-13.85,-275.2	0/0:-0,-9.63,-191.8	0/0:-0,-12.04,-240	0/0:-0,-18.66,-368.6	0/0:-0,-7.83,-156	0/0:-0,-15.65,-311.6	0/1:-84,-6.02,-36	0/0:-0,-12.04,-235.2	0/0:-0,-14.45,-284.7	0/0:-0,-13.25,-248	0/0:-0,-5.42,-104.2	0/0:-0,-7.83,-156	0/0:-0,-8.43,-168	0/0:-0,-14.45,-288	0/0:-0,-12.04,-240	0/0:-0,-10.84,-215.8	0/0:-0,-6.02,-110.8	0/0:-0.6,-6.62,-120.6	0/1:-58.3,-4.21,-24	0/0:-0,-6.02,-120	0/0:-0,-12.04,-235.1	0/0:-0,-15.65,-311.2	0/0:-0,-12.04,-240	0/1:-72,-14.45,-211.4	0/0:-0,-13.85,-275.2	0/0:-0,-10.84,-206.2	0/0:-0,-13.85,-274.8	0/0:-0,-6.62,-132	0/0:-0,-10.84,-214.9	0/0:-0,-12.64,-252	0/0:-0,-7.22,-142.3	0/0:-1.2,-7.83,-133.2	0/0:-0,-9.63,-192	chr28	13788714	13788715	XM_024986896.1	FXYD4	+	214416
chr29	37001557	37001831	SVTYPE=Bov-A2;END=37001831;SVLEN=274;ADJLEFT=37001557;ADJRIGHT=37001831	0/0:-0,-9.63,-192	0/1:-45.5,-4.21,-36	0/0:-0,-6.02,-119.4	0/0:-0,-11.44,-225.7	0/0:-1.2,-5.42,-83.6	0/0:-0,-8.43,-167.8	0/0:-0,-13.25,-263.2	0/0:-0,-10.84,-216	0/0:-0,-7.83,-156	0/0:-0,-7.83,-148.1	0/0:-0,-9.63,-191.7	0/0:-0,-5.42,-106.1	0/0:-0,-13.25,-255.2	0/0:-0,-7.22,-144	0/0:-0,-9.03,-173.4	0/0:-0,-4.82,-94.4	0/0:-0,-4.21,-83.9	0/0:-0,-15.65,-311.9	0/0:-0,-6.62,-131.4	0/0:-0,-7.22,-143.9	0/0:-0,-7.22,-142.3	0/0:-0,-10.84,-203.6	0/0:-0,-18.06,-360	0/0:-0,-9.03,-176	0/0:-0.6,-7.22,-120.6	0/1:-60,-7.83,-94	0/0:-0,-8.43,-168	0/0:-0,-4.21,-82.6	0/0:-0,-13.25,-259.9	0/0:-0,-7.22,-142	0/0:-0,-8.43,-165	0/0:-0,-6.62,-130	0/0:-0,-8.43,-166.3	0/0:-0,-9.03,-179.4	0/0:-0,-13.25,-261.8	0/0:-0,-6.02,-114.5	0/0:-0,-14.45,-288	0/0:-0,-7.83,-153.3	chr29	36975299	36975300	XM_015461215.2	SNX19	-	26258
chr29	37001557	37001831	SVTYPE=Bov-A2;END=37001831;SVLEN=274;ADJLEFT=37001557;ADJRIGHT=37001831	0/0:-0,-9.63,-192	0/1:-45.5,-4.21,-36	0/0:-0,-6.02,-119.4	0/0:-0,-11.44,-225.7	0/0:-1.2,-5.42,-83.6	0/0:-0,-8.43,-167.8	0/0:-0,-13.25,-263.2	0/0:-0,-10.84,-216	0/0:-0,-7.83,-156	0/0:-0,-7.83,-148.1	0/0:-0,-9.63,-191.7	0/0:-0,-5.42,-106.1	0/0:-0,-13.25,-255.2	0/0:-0,-7.22,-144	0/0:-0,-9.03,-173.4	0/0:-0,-4.82,-94.4	0/0:-0,-4.21,-83.9	0/0:-0,-15.65,-311.9	0/0:-0,-6.62,-131.4	0/0:-0,-7.22,-143.9	0/0:-0,-7.22,-142.3	0/0:-0,-10.84,-203.6	0/0:-0,-18.06,-360	0/0:-0,-9.03,-176	0/0:-0.6,-7.22,-120.6	0/1:-60,-7.83,-94	0/0:-0,-8.43,-168	0/0:-0,-4.21,-82.6	0/0:-0,-13.25,-259.9	0/0:-0,-7.22,-142	0/0:-0,-8.43,-165	0/0:-0,-6.62,-130	0/0:-0,-8.43,-166.3	0/0:-0,-9.03,-179.4	0/0:-0,-13.25,-261.8	0/0:-0,-6.02,-114.5	0/0:-0,-14.45,-288	0/0:-0,-7.83,-153.3	chr29	37055519	37055520	XM_005226839.2	MS4A8	+	53689
chr29	37001557	37001831	SVTYPE=Bov-A2;END=37001831;SVLEN=274;ADJLEFT=37001557;ADJRIGHT=37001831	0/0:-0,-9.63,-192	0/1:-45.5,-4.21,-36	0/0:-0,-6.02,-119.4	0/0:-0,-11.44,-225.7	0/0:-1.2,-5.42,-83.6	0/0:-0,-8.43,-167.8	0/0:-0,-13.25,-263.2	0/0:-0,-10.84,-216	0/0:-0,-7.83,-156	0/0:-0,-7.83,-148.1	0/0:-0,-9.63,-191.7	0/0:-0,-5.42,-106.1	0/0:-0,-13.25,-255.2	0/0:-0,-7.22,-144	0/0:-0,-9.03,-173.4	0/0:-0,-4.82,-94.4	0/0:-0,-4.21,-83.9	0/0:-0,-15.65,-311.9	0/0:-0,-6.62,-131.4	0/0:-0,-7.22,-143.9	0/0:-0,-7.22,-142.3	0/0:-0,-10.84,-203.6	0/0:-0,-18.06,-360	0/0:-0,-9.03,-176	0/0:-0.6,-7.22,-120.6	0/1:-60,-7.83,-94	0/0:-0,-8.43,-168	0/0:-0,-4.21,-82.6	0/0:-0,-13.25,-259.9	0/0:-0,-7.22,-142	0/0:-0,-8.43,-165	0/0:-0,-6.62,-130	0/0:-0,-8.43,-166.3	0/0:-0,-9.03,-179.4	0/0:-0,-13.25,-261.8	0/0:-0,-6.02,-114.5	0/0:-0,-14.45,-288	0/0:-0,-7.83,-153.3	chr29	37055730	37055731	XR_240655.4	LOC101907707	-	53900
chr29	37001557	37001831	SVTYPE=Bov-A2;END=37001831;SVLEN=274;ADJLEFT=37001557;ADJRIGHT=37001831	0/0:-0,-9.63,-192	0/1:-45.5,-4.21,-36	0/0:-0,-6.02,-119.4	0/0:-0,-11.44,-225.7	0/0:-1.2,-5.42,-83.6	0/0:-0,-8.43,-167.8	0/0:-0,-13.25,-263.2	0/0:-0,-10.84,-216	0/0:-0,-7.83,-156	0/0:-0,-7.83,-148.1	0/0:-0,-9.63,-191.7	0/0:-0,-5.42,-106.1	0/0:-0,-13.25,-255.2	0/0:-0,-7.22,-144	0/0:-0,-9.03,-173.4	0/0:-0,-4.82,-94.4	0/0:-0,-4.21,-83.9	0/0:-0,-15.65,-311.9	0/0:-0,-6.62,-131.4	0/0:-0,-7.22,-143.9	0/0:-0,-7.22,-142.3	0/0:-0,-10.84,-203.6	0/0:-0,-18.06,-360	0/0:-0,-9.03,-176	0/0:-0.6,-7.22,-120.6	0/1:-60,-7.83,-94	0/0:-0,-8.43,-168	0/0:-0,-4.21,-82.6	0/0:-0,-13.25,-259.9	0/0:-0,-7.22,-142	0/0:-0,-8.43,-165	0/0:-0,-6.62,-130	0/0:-0,-8.43,-166.3	0/0:-0,-9.03,-179.4	0/0:-0,-13.25,-261.8	0/0:-0,-6.02,-114.5	0/0:-0,-14.45,-288	0/0:-0,-7.83,-153.3	chr29	37085870	37085871	XM_024987113.1	MS4A18	+	84040
chr29	37001557	37001831	SVTYPE=Bov-A2;END=37001831;SVLEN=274;ADJLEFT=37001557;ADJRIGHT=37001831	0/0:-0,-9.63,-192	0/1:-45.5,-4.21,-36	0/0:-0,-6.02,-119.4	0/0:-0,-11.44,-225.7	0/0:-1.2,-5.42,-83.6	0/0:-0,-8.43,-167.8	0/0:-0,-13.25,-263.2	0/0:-0,-10.84,-216	0/0:-0,-7.83,-156	0/0:-0,-7.83,-148.1	0/0:-0,-9.63,-191.7	0/0:-0,-5.42,-106.1	0/0:-0,-13.25,-255.2	0/0:-0,-7.22,-144	0/0:-0,-9.03,-173.4	0/0:-0,-4.82,-94.4	0/0:-0,-4.21,-83.9	0/0:-0,-15.65,-311.9	0/0:-0,-6.62,-131.4	0/0:-0,-7.22,-143.9	0/0:-0,-7.22,-142.3	0/0:-0,-10.84,-203.6	0/0:-0,-18.06,-360	0/0:-0,-9.03,-176	0/0:-0.6,-7.22,-120.6	0/1:-60,-7.83,-94	0/0:-0,-8.43,-168	0/0:-0,-4.21,-82.6	0/0:-0,-13.25,-259.9	0/0:-0,-7.22,-142	0/0:-0,-8.43,-165	0/0:-0,-6.62,-130	0/0:-0,-8.43,-166.3	0/0:-0,-9.03,-179.4	0/0:-0,-13.25,-261.8	0/0:-0,-6.02,-114.5	0/0:-0,-14.45,-288	0/0:-0,-7.83,-153.3	chr29	36891005	36891006	XR_003033239.1	LOC101907357	+	110552
chr29	37001557	37001831	SVTYPE=Bov-A2;END=37001831;SVLEN=274;ADJLEFT=37001557;ADJRIGHT=37001831	0/0:-0,-9.63,-192	0/1:-45.5,-4.21,-36	0/0:-0,-6.02,-119.4	0/0:-0,-11.44,-225.7	0/0:-1.2,-5.42,-83.6	0/0:-0,-8.43,-167.8	0/0:-0,-13.25,-263.2	0/0:-0,-10.84,-216	0/0:-0,-7.83,-156	0/0:-0,-7.83,-148.1	0/0:-0,-9.63,-191.7	0/0:-0,-5.42,-106.1	0/0:-0,-13.25,-255.2	0/0:-0,-7.22,-144	0/0:-0,-9.03,-173.4	0/0:-0,-4.82,-94.4	0/0:-0,-4.21,-83.9	0/0:-0,-15.65,-311.9	0/0:-0,-6.62,-131.4	0/0:-0,-7.22,-143.9	0/0:-0,-7.22,-142.3	0/0:-0,-10.84,-203.6	0/0:-0,-18.06,-360	0/0:-0,-9.03,-176	0/0:-0.6,-7.22,-120.6	0/1:-60,-7.83,-94	0/0:-0,-8.43,-168	0/0:-0,-4.21,-82.6	0/0:-0,-13.25,-259.9	0/0:-0,-7.22,-142	0/0:-0,-8.43,-165	0/0:-0,-6.62,-130	0/0:-0,-8.43,-166.3	0/0:-0,-9.03,-179.4	0/0:-0,-13.25,-261.8	0/0:-0,-6.02,-114.5	0/0:-0,-14.45,-288	0/0:-0,-7.83,-153.3	chr29	37113307	37113308	XM_010820984.3	MS4A15	+	111477
chr29	37001557	37001831	SVTYPE=Bov-A2;END=37001831;SVLEN=274;ADJLEFT=37001557;ADJRIGHT=37001831	0/0:-0,-9.63,-192	0/1:-45.5,-4.21,-36	0/0:-0,-6.02,-119.4	0/0:-0,-11.44,-225.7	0/0:-1.2,-5.42,-83.6	0/0:-0,-8.43,-167.8	0/0:-0,-13.25,-263.2	0/0:-0,-10.84,-216	0/0:-0,-7.83,-156	0/0:-0,-7.83,-148.1	0/0:-0,-9.63,-191.7	0/0:-0,-5.42,-106.1	0/0:-0,-13.25,-255.2	0/0:-0,-7.22,-144	0/0:-0,-9.03,-173.4	0/0:-0,-4.82,-94.4	0/0:-0,-4.21,-83.9	0/0:-0,-15.65,-311.9	0/0:-0,-6.62,-131.4	0/0:-0,-7.22,-143.9	0/0:-0,-7.22,-142.3	0/0:-0,-10.84,-203.6	0/0:-0,-18.06,-360	0/0:-0,-9.03,-176	0/0:-0.6,-7.22,-120.6	0/1:-60,-7.83,-94	0/0:-0,-8.43,-168	0/0:-0,-4.21,-82.6	0/0:-0,-13.25,-259.9	0/0:-0,-7.22,-142	0/0:-0,-8.43,-165	0/0:-0,-6.62,-130	0/0:-0,-8.43,-166.3	0/0:-0,-9.03,-179.4	0/0:-0,-13.25,-261.8	0/0:-0,-6.02,-114.5	0/0:-0,-14.45,-288	0/0:-0,-7.83,-153.3	chr29	37130781	37130782	XM_024987547.1	MS4A10	+	128951
chr29	37001557	37001831	SVTYPE=Bov-A2;END=37001831;SVLEN=274;ADJLEFT=37001557;ADJRIGHT=37001831	0/0:-0,-9.63,-192	0/1:-45.5,-4.21,-36	0/0:-0,-6.02,-119.4	0/0:-0,-11.44,-225.7	0/0:-1.2,-5.42,-83.6	0/0:-0,-8.43,-167.8	0/0:-0,-13.25,-263.2	0/0:-0,-10.84,-216	0/0:-0,-7.83,-156	0/0:-0,-7.83,-148.1	0/0:-0,-9.63,-191.7	0/0:-0,-5.42,-106.1	0/0:-0,-13.25,-255.2	0/0:-0,-7.22,-144	0/0:-0,-9.03,-173.4	0/0:-0,-4.82,-94.4	0/0:-0,-4.21,-83.9	0/0:-0,-15.65,-311.9	0/0:-0,-6.62,-131.4	0/0:-0,-7.22,-143.9	0/0:-0,-7.22,-142.3	0/0:-0,-10.84,-203.6	0/0:-0,-18.06,-360	0/0:-0,-9.03,-176	0/0:-0.6,-7.22,-120.6	0/1:-60,-7.83,-94	0/0:-0,-8.43,-168	0/0:-0,-4.21,-82.6	0/0:-0,-13.25,-259.9	0/0:-0,-7.22,-142	0/0:-0,-8.43,-165	0/0:-0,-6.62,-130	0/0:-0,-8.43,-166.3	0/0:-0,-9.03,-179.4	0/0:-0,-13.25,-261.8	0/0:-0,-6.02,-114.5	0/0:-0,-14.45,-288	0/0:-0,-7.83,-153.3	chr29	37169967	37169968	XR_003033222.1	LOC112444852	-	168137
chr29	37001557	37001831	SVTYPE=Bov-A2;END=37001831;SVLEN=274;ADJLEFT=37001557;ADJRIGHT=37001831	0/0:-0,-9.63,-192	0/1:-45.5,-4.21,-36	0/0:-0,-6.02,-119.4	0/0:-0,-11.44,-225.7	0/0:-1.2,-5.42,-83.6	0/0:-0,-8.43,-167.8	0/0:-0,-13.25,-263.2	0/0:-0,-10.84,-216	0/0:-0,-7.83,-156	0/0:-0,-7.83,-148.1	0/0:-0,-9.63,-191.7	0/0:-0,-5.42,-106.1	0/0:-0,-13.25,-255.2	0/0:-0,-7.22,-144	0/0:-0,-9.03,-173.4	0/0:-0,-4.82,-94.4	0/0:-0,-4.21,-83.9	0/0:-0,-15.65,-311.9	0/0:-0,-6.62,-131.4	0/0:-0,-7.22,-143.9	0/0:-0,-7.22,-142.3	0/0:-0,-10.84,-203.6	0/0:-0,-18.06,-360	0/0:-0,-9.03,-176	0/0:-0.6,-7.22,-120.6	0/1:-60,-7.83,-94	0/0:-0,-8.43,-168	0/0:-0,-4.21,-82.6	0/0:-0,-13.25,-259.9	0/0:-0,-7.22,-142	0/0:-0,-8.43,-165	0/0:-0,-6.62,-130	0/0:-0,-8.43,-166.3	0/0:-0,-9.03,-179.4	0/0:-0,-13.25,-261.8	0/0:-0,-6.02,-114.5	0/0:-0,-14.45,-288	0/0:-0,-7.83,-153.3	chr29	37170153	37170154	NM_001038574.1	CCDC86	+	168323
chr29	37001557	37001831	SVTYPE=Bov-A2;END=37001831;SVLEN=274;ADJLEFT=37001557;ADJRIGHT=37001831	0/0:-0,-9.63,-192	0/1:-45.5,-4.21,-36	0/0:-0,-6.02,-119.4	0/0:-0,-11.44,-225.7	0/0:-1.2,-5.42,-83.6	0/0:-0,-8.43,-167.8	0/0:-0,-13.25,-263.2	0/0:-0,-10.84,-216	0/0:-0,-7.83,-156	0/0:-0,-7.83,-148.1	0/0:-0,-9.63,-191.7	0/0:-0,-5.42,-106.1	0/0:-0,-13.25,-255.2	0/0:-0,-7.22,-144	0/0:-0,-9.03,-173.4	0/0:-0,-4.82,-94.4	0/0:-0,-4.21,-83.9	0/0:-0,-15.65,-311.9	0/0:-0,-6.62,-131.4	0/0:-0,-7.22,-143.9	0/0:-0,-7.22,-142.3	0/0:-0,-10.84,-203.6	0/0:-0,-18.06,-360	0/0:-0,-9.03,-176	0/0:-0.6,-7.22,-120.6	0/1:-60,-7.83,-94	0/0:-0,-8.43,-168	0/0:-0,-4.21,-82.6	0/0:-0,-13.25,-259.9	0/0:-0,-7.22,-142	0/0:-0,-8.43,-165	0/0:-0,-6.62,-130	0/0:-0,-8.43,-166.3	0/0:-0,-9.03,-179.4	0/0:-0,-13.25,-261.8	0/0:-0,-6.02,-114.5	0/0:-0,-14.45,-288	0/0:-0,-7.83,-153.3	chr29	37187629	37187630	XM_024987411.1	PTGDR2	-	185799
chr29	37001557	37001831	SVTYPE=Bov-A2;END=37001831;SVLEN=274;ADJLEFT=37001557;ADJRIGHT=37001831	0/0:-0,-9.63,-192	0/1:-45.5,-4.21,-36	0/0:-0,-6.02,-119.4	0/0:-0,-11.44,-225.7	0/0:-1.2,-5.42,-83.6	0/0:-0,-8.43,-167.8	0/0:-0,-13.25,-263.2	0/0:-0,-10.84,-216	0/0:-0,-7.83,-156	0/0:-0,-7.83,-148.1	0/0:-0,-9.63,-191.7	0/0:-0,-5.42,-106.1	0/0:-0,-13.25,-255.2	0/0:-0,-7.22,-144	0/0:-0,-9.03,-173.4	0/0:-0,-4.82,-94.4	0/0:-0,-4.21,-83.9	0/0:-0,-15.65,-311.9	0/0:-0,-6.62,-131.4	0/0:-0,-7.22,-143.9	0/0:-0,-7.22,-142.3	0/0:-0,-10.84,-203.6	0/0:-0,-18.06,-360	0/0:-0,-9.03,-176	0/0:-0.6,-7.22,-120.6	0/1:-60,-7.83,-94	0/0:-0,-8.43,-168	0/0:-0,-4.21,-82.6	0/0:-0,-13.25,-259.9	0/0:-0,-7.22,-142	0/0:-0,-8.43,-165	0/0:-0,-6.62,-130	0/0:-0,-8.43,-166.3	0/0:-0,-9.03,-179.4	0/0:-0,-13.25,-261.8	0/0:-0,-6.02,-114.5	0/0:-0,-14.45,-288	0/0:-0,-7.83,-153.3	chr29	37233565	37233566	NM_001075640.1	PRPF19	-	231735
chr7	10965343	10965627	SVTYPE=Bov-A2;END=10965627;SVLEN=284;ADJLEFT=10965343;ADJRIGHT=10965627	0/1:-83.6,-20.47,-308.33	0/0:-1.81,-19.27,-339.11	0/1:-84.8,-22.28,-334.33	0/0:-0,-4.21,-84	0/1:-85.4,-16.26,-228.01	0/1:-35.3,-8.43,-128.3	0/1:-84.91,-25.89,-415.81	0/1:-104.1,-21.67,-310.03	0/1:-95.4,-27.09,-416.6	0/1:-54.3,-10.24,-141.4	0/1:-35.9,-15.05,-248.13	0/1:-40.3,-6.62,-80.4	0/1:-26.5,-13.25,-218.6	0/0:-1.21,-13.85,-247.1	0/1:-78.6,-10.24,-95.39	0/0:-1.2,-6.62,-109.2	0/0:-0.6,-6.62,-120.6	0/0:-1.2,-9.03,-157.2	0/1:-101.4,-15.65,-192.11	0/1:-45.2,-5.42,-60	0/1:-58.6,-16.86,-261.62	0/1:-45.2,-9.63,-140	0/0:-1.2,-3.61,-49.2	0/1:-51.1,-8.43,-106	0/0:-0.6,-6.62,-120.4	0/1:-56.2,-7.83,-80.2	0/0:-0.6,-19.27,-370.6	0/0:-0.62,-10.84,-199.9	0/1:-106.1,-15.65,-180.02	0/1:-48.9,-10.84,-154.06	0/0:-0.6,-6.62,-119.6	0/0:-3.67,-18.06,-280.71	1/1:-29.4,-1.81,-0	0/1:-90.1,-18.06,-248.44	0/1:-41.7,-10.24,-156	0/0:-0,-2.41,-48	0/0:-1.81,-6.02,-85.81	0/1:-22.2,-4.82,-72	chr7	10997855	10997856	XM_024994854.1	LOC112447333	+	32229
chr7	10965343	10965627	SVTYPE=Bov-A2;END=10965627;SVLEN=284;ADJLEFT=10965343;ADJRIGHT=10965627	0/1:-83.6,-20.47,-308.33	0/0:-1.81,-19.27,-339.11	0/1:-84.8,-22.28,-334.33	0/0:-0,-4.21,-84	0/1:-85.4,-16.26,-228.01	0/1:-35.3,-8.43,-128.3	0/1:-84.91,-25.89,-415.81	0/1:-104.1,-21.67,-310.03	0/1:-95.4,-27.09,-416.6	0/1:-54.3,-10.24,-141.4	0/1:-35.9,-15.05,-248.13	0/1:-40.3,-6.62,-80.4	0/1:-26.5,-13.25,-218.6	0/0:-1.21,-13.85,-247.1	0/1:-78.6,-10.24,-95.39	0/0:-1.2,-6.62,-109.2	0/0:-0.6,-6.62,-120.6	0/0:-1.2,-9.03,-157.2	0/1:-101.4,-15.65,-192.11	0/1:-45.2,-5.42,-60	0/1:-58.6,-16.86,-261.62	0/1:-45.2,-9.63,-140	0/0:-1.2,-3.61,-49.2	0/1:-51.1,-8.43,-106	0/0:-0.6,-6.62,-120.4	0/1:-56.2,-7.83,-80.2	0/0:-0.6,-19.27,-370.6	0/0:-0.62,-10.84,-199.9	0/1:-106.1,-15.65,-180.02	0/1:-48.9,-10.84,-154.06	0/0:-0.6,-6.62,-119.6	0/0:-3.67,-18.06,-280.71	1/1:-29.4,-1.81,-0	0/1:-90.1,-18.06,-248.44	0/1:-41.7,-10.24,-156	0/0:-0,-2.41,-48	0/0:-1.81,-6.02,-85.81	0/1:-22.2,-4.82,-72	chr7	10868307	10868308	XM_024994841.1	LOC100300051	-	97036
chr7	10965343	10965627	SVTYPE=Bov-A2;END=10965627;SVLEN=284;ADJLEFT=10965343;ADJRIGHT=10965627	0/1:-83.6,-20.47,-308.33	0/0:-1.81,-19.27,-339.11	0/1:-84.8,-22.28,-334.33	0/0:-0,-4.21,-84	0/1:-85.4,-16.26,-228.01	0/1:-35.3,-8.43,-128.3	0/1:-84.91,-25.89,-415.81	0/1:-104.1,-21.67,-310.03	0/1:-95.4,-27.09,-416.6	0/1:-54.3,-10.24,-141.4	0/1:-35.9,-15.05,-248.13	0/1:-40.3,-6.62,-80.4	0/1:-26.5,-13.25,-218.6	0/0:-1.21,-13.85,-247.1	0/1:-78.6,-10.24,-95.39	0/0:-1.2,-6.62,-109.2	0/0:-0.6,-6.62,-120.6	0/0:-1.2,-9.03,-157.2	0/1:-101.4,-15.65,-192.11	0/1:-45.2,-5.42,-60	0/1:-58.6,-16.86,-261.62	0/1:-45.2,-9.63,-140	0/0:-1.2,-3.61,-49.2	0/1:-51.1,-8.43,-106	0/0:-0.6,-6.62,-120.4	0/1:-56.2,-7.83,-80.2	0/0:-0.6,-19.27,-370.6	0/0:-0.62,-10.84,-199.9	0/1:-106.1,-15.65,-180.02	0/1:-48.9,-10.84,-154.06	0/0:-0.6,-6.62,-119.6	0/0:-3.67,-18.06,-280.71	1/1:-29.4,-1.81,-0	0/1:-90.1,-18.06,-248.44	0/1:-41.7,-10.24,-156	0/0:-0,-2.41,-48	0/0:-1.81,-6.02,-85.81	0/1:-22.2,-4.82,-72	chr7	11102143	11102144	XM_005208601.4	ZNF333	-	136517
chr7	10965343	10965627	SVTYPE=Bov-A2;END=10965627;SVLEN=284;ADJLEFT=10965343;ADJRIGHT=10965627	0/1:-83.6,-20.47,-308.33	0/0:-1.81,-19.27,-339.11	0/1:-84.8,-22.28,-334.33	0/0:-0,-4.21,-84	0/1:-85.4,-16.26,-228.01	0/1:-35.3,-8.43,-128.3	0/1:-84.91,-25.89,-415.81	0/1:-104.1,-21.67,-310.03	0/1:-95.4,-27.09,-416.6	0/1:-54.3,-10.24,-141.4	0/1:-35.9,-15.05,-248.13	0/1:-40.3,-6.62,-80.4	0/1:-26.5,-13.25,-218.6	0/0:-1.21,-13.85,-247.1	0/1:-78.6,-10.24,-95.39	0/0:-1.2,-6.62,-109.2	0/0:-0.6,-6.62,-120.6	0/0:-1.2,-9.03,-157.2	0/1:-101.4,-15.65,-192.11	0/1:-45.2,-5.42,-60	0/1:-58.6,-16.86,-261.62	0/1:-45.2,-9.63,-140	0/0:-1.2,-3.61,-49.2	0/1:-51.1,-8.43,-106	0/0:-0.6,-6.62,-120.4	0/1:-56.2,-7.83,-80.2	0/0:-0.6,-19.27,-370.6	0/0:-0.62,-10.84,-199.9	0/1:-106.1,-15.65,-180.02	0/1:-48.9,-10.84,-154.06	0/0:-0.6,-6.62,-119.6	0/0:-3.67,-18.06,-280.71	1/1:-29.4,-1.81,-0	0/1:-90.1,-18.06,-248.44	0/1:-41.7,-10.24,-156	0/0:-0,-2.41,-48	0/0:-1.81,-6.02,-85.81	0/1:-22.2,-4.82,-72	chr7	11116555	11116556	XM_005228631.4	ADGRE3	+	150929
chr7	10965343	10965627	SVTYPE=Bov-A2;END=10965627;SVLEN=284;ADJLEFT=10965343;ADJRIGHT=10965627	0/1:-83.6,-20.47,-308.33	0/0:-1.81,-19.27,-339.11	0/1:-84.8,-22.28,-334.33	0/0:-0,-4.21,-84	0/1:-85.4,-16.26,-228.01	0/1:-35.3,-8.43,-128.3	0/1:-84.91,-25.89,-415.81	0/1:-104.1,-21.67,-310.03	0/1:-95.4,-27.09,-416.6	0/1:-54.3,-10.24,-141.4	0/1:-35.9,-15.05,-248.13	0/1:-40.3,-6.62,-80.4	0/1:-26.5,-13.25,-218.6	0/0:-1.21,-13.85,-247.1	0/1:-78.6,-10.24,-95.39	0/0:-1.2,-6.62,-109.2	0/0:-0.6,-6.62,-120.6	0/0:-1.2,-9.03,-157.2	0/1:-101.4,-15.65,-192.11	0/1:-45.2,-5.42,-60	0/1:-58.6,-16.86,-261.62	0/1:-45.2,-9.63,-140	0/0:-1.2,-3.61,-49.2	0/1:-51.1,-8.43,-106	0/0:-0.6,-6.62,-120.4	0/1:-56.2,-7.83,-80.2	0/0:-0.6,-19.27,-370.6	0/0:-0.62,-10.84,-199.9	0/1:-106.1,-15.65,-180.02	0/1:-48.9,-10.84,-154.06	0/0:-0.6,-6.62,-119.6	0/0:-3.67,-18.06,-280.71	1/1:-29.4,-1.81,-0	0/1:-90.1,-18.06,-248.44	0/1:-41.7,-10.24,-156	0/0:-0,-2.41,-48	0/0:-1.81,-6.02,-85.81	0/1:-22.2,-4.82,-72	chr7	10747980	10747981	XM_024995359.1	LOC100299045	+	217363
chr7	27739104	27739364	SVTYPE=Bov-A2;END=27739364;SVLEN=260;ADJLEFT=27739104;ADJRIGHT=27739364	0/0:-0,-11.44,-228	0/0:-0,-13.85,-270.2	0/0:-0,-6.62,-132	0/0:-0.6,-6.02,-108.6	0/0:-0,-14.45,-287.9	0/0:-0,-9.03,-179.3	0/0:-0,-10.24,-202.5	0/0:-0,-11.44,-223.1	0/0:-0,-10.24,-204	0/0:-0,-5.42,-103.5	0/0:-0,-8.43,-168	0/0:-0,-3.61,-68.2	0/0:-0,-14.45,-284.5	0/0:-0,-13.85,-276	0/0:-0,-10.24,-194.5	0/0:-0,-4.82,-96	0/0:-0,-7.22,-144	0/0:-0,-12.64,-252	0/0:-0,-6.62,-132	0/0:-1.2,-8.43,-145.2	0/0:-0,-9.03,-180	0/0:-0,-5.42,-106.8	0/0:-0,-7.22,-144	0/0:-0,-6.02,-117.3	0/0:-0,-9.03,-178.5	0/0:-0,-18.66,-358.7	0/0:-0,-10.24,-203	0/0:-0,-7.22,-144	0/0:-0,-10.24,-203.3	0/0:-0,-8.43,-166.8	0/0:-0,-9.03,-178	0/0:-0,-12.04,-240	0/0:-0,-12.64,-252	0/0:-0,-7.83,-156	0/0:-0,-12.64,-252	0/1:-60,-4.82,-36	0/0:-1.2,-7.22,-121.2	0/0:-0,-7.83,-156	chr7	27533321	27533322	XR_807732.3	LOC104969133	+	205783
chr7	80748008	80748265	SVTYPE=Bov-A2;END=80748265;SVLEN=257;ADJLEFT=0;ADJRIGHT=0	0/0:-0,-10.84,-210	0/0:-0,-13.25,-246.5	0/0:-0,-4.21,-84	0/1:-24,-4.21,-60	0/0:-0,-10.84,-212.7	0/0:-0,-7.83,-154	0/0:-0,-10.84,-210.6	0/0:-0,-5.42,-108	0/0:-0,-7.83,-152	0/0:-0,-10.84,-198.7	0/0:-0,-6.62,-132	0/0:-0,-1.2,-24	0/0:-0,-16.86,-322.9	0/0:-0,-6.62,-132	0/0:-0,-7.22,-142	0/0:-0,-4.82,-86.4	0/0:-1.2,-1.2,-1.2	0/0:-0,-8.43,-164.3	0/0:-0,-10.24,-193	0/0:-1.2,-1.2,-1.2	0/0:-0,-13.85,-265.6	0/0:-0,-6.02,-110.5	0/0:-0,-14.45,-286.7	0/0:-0,-7.83,-146	0/0:-0,-6.02,-114	0/0:-0,-10.24,-187.9	0/0:-0,-9.03,-172	0/0:-0,-7.83,-147.5	0/0:-0,-6.02,-120	0/0:-0,-9.03,-176.5	0/0:-0,-16.86,-325.9	0/0:-0,-7.83,-154	0/0:-0,-6.02,-120	0/0:-0.6,-6.62,-120.6	0/0:-0,-17.46,-343	0/0:-0,-7.83,-156	0/0:-0,-12.04,-240	0/0:-0,-4.82,-96	chr7	80748877	80748878	NM_001077883.1	DHFR	-	613
chr7	80748008	80748265	SVTYPE=Bov-A2;END=80748265;SVLEN=257;ADJLEFT=0;ADJRIGHT=0	0/0:-0,-10.84,-210	0/0:-0,-13.25,-246.5	0/0:-0,-4.21,-84	0/1:-24,-4.21,-60	0/0:-0,-10.84,-212.7	0/0:-0,-7.83,-154	0/0:-0,-10.84,-210.6	0/0:-0,-5.42,-108	0/0:-0,-7.83,-152	0/0:-0,-10.84,-198.7	0/0:-0,-6.62,-132	0/0:-0,-1.2,-24	0/0:-0,-16.86,-322.9	0/0:-0,-6.62,-132	0/0:-0,-7.22,-142	0/0:-0,-4.82,-86.4	0/0:-1.2,-1.2,-1.2	0/0:-0,-8.43,-164.3	0/0:-0,-10.24,-193	0/0:-1.2,-1.2,-1.2	0/0:-0,-13.85,-265.6	0/0:-0,-6.02,-110.5	0/0:-0,-14.45,-286.7	0/0:-0,-7.83,-146	0/0:-0,-6.02,-114	0/0:-0,-10.24,-187.9	0/0:-0,-9.03,-172	0/0:-0,-7.83,-147.5	0/0:-0,-6.02,-120	0/0:-0,-9.03,-176.5	0/0:-0,-16.86,-325.9	0/0:-0,-7.83,-154	0/0:-0,-6.02,-120	0/0:-0.6,-6.62,-120.6	0/0:-0,-17.46,-343	0/0:-0,-7.83,-156	0/0:-0,-12.04,-240	0/0:-0,-4.82,-96	chr7	80748971	80748972	XM_024994618.1	MSH3	+	707
chr7	80748008	80748265	SVTYPE=Bov-A2;END=80748265;SVLEN=257;ADJLEFT=0;ADJRIGHT=0	0/0:-0,-10.84,-210	0/0:-0,-13.25,-246.5	0/0:-0,-4.21,-84	0/1:-24,-4.21,-60	0/0:-0,-10.84,-212.7	0/0:-0,-7.83,-154	0/0:-0,-10.84,-210.6	0/0:-0,-5.42,-108	0/0:-0,-7.83,-152	0/0:-0,-10.84,-198.7	0/0:-0,-6.62,-132	0/0:-0,-1.2,-24	0/0:-0,-16.86,-322.9	0/0:-0,-6.62,-132	0/0:-0,-7.22,-142	0/0:-0,-4.82,-86.4	0/0:-1.2,-1.2,-1.2	0/0:-0,-8.43,-164.3	0/0:-0,-10.24,-193	0/0:-1.2,-1.2,-1.2	0/0:-0,-13.85,-265.6	0/0:-0,-6.02,-110.5	0/0:-0,-14.45,-286.7	0/0:-0,-7.83,-146	0/0:-0,-6.02,-114	0/0:-0,-10.24,-187.9	0/0:-0,-9.03,-172	0/0:-0,-7.83,-147.5	0/0:-0,-6.02,-120	0/0:-0,-9.03,-176.5	0/0:-0,-16.86,-325.9	0/0:-0,-7.83,-154	0/0:-0,-6.02,-120	0/0:-0.6,-6.62,-120.6	0/0:-0,-17.46,-343	0/0:-0,-7.83,-156	0/0:-0,-12.04,-240	0/0:-0,-4.82,-96	chr7	80694010	80694011	NM_001207060.1	ANKRD34B	-	53998
chr7	80748008	80748265	SVTYPE=Bov-A2;END=80748265;SVLEN=257;ADJLEFT=0;ADJRIGHT=0	0/0:-0,-10.84,-210	0/0:-0,-13.25,-246.5	0/0:-0,-4.21,-84	0/1:-24,-4.21,-60	0/0:-0,-10.84,-212.7	0/0:-0,-7.83,-154	0/0:-0,-10.84,-210.6	0/0:-0,-5.42,-108	0/0:-0,-7.83,-152	0/0:-0,-10.84,-198.7	0/0:-0,-6.62,-132	0/0:-0,-1.2,-24	0/0:-0,-16.86,-322.9	0/0:-0,-6.62,-132	0/0:-0,-7.22,-142	0/0:-0,-4.82,-86.4	0/0:-1.2,-1.2,-1.2	0/0:-0,-8.43,-164.3	0/0:-0,-10.24,-193	0/0:-1.2,-1.2,-1.2	0/0:-0,-13.85,-265.6	0/0:-0,-6.02,-110.5	0/0:-0,-14.45,-286.7	0/0:-0,-7.83,-146	0/0:-0,-6.02,-114	0/0:-0,-10.24,-187.9	0/0:-0,-9.03,-172	0/0:-0,-7.83,-147.5	0/0:-0,-6.02,-120	0/0:-0,-9.03,-176.5	0/0:-0,-16.86,-325.9	0/0:-0,-7.83,-154	0/0:-0,-6.02,-120	0/0:-0.6,-6.62,-120.6	0/0:-0,-17.46,-343	0/0:-0,-7.83,-156	0/0:-0,-12.04,-240	0/0:-0,-4.82,-96	chr7	80693435	80693436	XR_003035704.1	LOC112447482	+	54573
chr7	80748008	80748265	SVTYPE=Bov-A2;END=80748265;SVLEN=257;ADJLEFT=0;ADJRIGHT=0	0/0:-0,-10.84,-210	0/0:-0,-13.25,-246.5	0/0:-0,-4.21,-84	0/1:-24,-4.21,-60	0/0:-0,-10.84,-212.7	0/0:-0,-7.83,-154	0/0:-0,-10.84,-210.6	0/0:-0,-5.42,-108	0/0:-0,-7.83,-152	0/0:-0,-10.84,-198.7	0/0:-0,-6.62,-132	0/0:-0,-1.2,-24	0/0:-0,-16.86,-322.9	0/0:-0,-6.62,-132	0/0:-0,-7.22,-142	0/0:-0,-4.82,-86.4	0/0:-1.2,-1.2,-1.2	0/0:-0,-8.43,-164.3	0/0:-0,-10.24,-193	0/0:-1.2,-1.2,-1.2	0/0:-0,-13.85,-265.6	0/0:-0,-6.02,-110.5	0/0:-0,-14.45,-286.7	0/0:-0,-7.83,-146	0/0:-0,-6.02,-114	0/0:-0,-10.24,-187.9	0/0:-0,-9.03,-172	0/0:-0,-7.83,-147.5	0/0:-0,-6.02,-120	0/0:-0,-9.03,-176.5	0/0:-0,-16.86,-325.9	0/0:-0,-7.83,-154	0/0:-0,-6.02,-120	0/0:-0.6,-6.62,-120.6	0/0:-0,-17.46,-343	0/0:-0,-7.83,-156	0/0:-0,-12.04,-240	0/0:-0,-4.82,-96	chr7	80632926	80632927	XM_010807581.3	FAM151B	+	115082
chr7	80748008	80748265	SVTYPE=Bov-A2;END=80748265;SVLEN=257;ADJLEFT=0;ADJRIGHT=0	0/0:-0,-10.84,-210	0/0:-0,-13.25,-246.5	0/0:-0,-4.21,-84	0/1:-24,-4.21,-60	0/0:-0,-10.84,-212.7	0/0:-0,-7.83,-154	0/0:-0,-10.84,-210.6	0/0:-0,-5.42,-108	0/0:-0,-7.83,-152	0/0:-0,-10.84,-198.7	0/0:-0,-6.62,-132	0/0:-0,-1.2,-24	0/0:-0,-16.86,-322.9	0/0:-0,-6.62,-132	0/0:-0,-7.22,-142	0/0:-0,-4.82,-86.4	0/0:-1.2,-1.2,-1.2	0/0:-0,-8.43,-164.3	0/0:-0,-10.24,-193	0/0:-1.2,-1.2,-1.2	0/0:-0,-13.85,-265.6	0/0:-0,-6.02,-110.5	0/0:-0,-14.45,-286.7	0/0:-0,-7.83,-146	0/0:-0,-6.02,-114	0/0:-0,-10.24,-187.9	0/0:-0,-9.03,-172	0/0:-0,-7.83,-147.5	0/0:-0,-6.02,-120	0/0:-0,-9.03,-176.5	0/0:-0,-16.86,-325.9	0/0:-0,-7.83,-154	0/0:-0,-6.02,-120	0/0:-0.6,-6.62,-120.6	0/0:-0,-17.46,-343	0/0:-0,-7.83,-156	0/0:-0,-12.04,-240	0/0:-0,-4.82,-96	chr7	80632838	80632839	XR_003035703.1	LOC112447481	-	115170
chr7	80748008	80748265	SVTYPE=Bov-A2;END=80748265;SVLEN=257;ADJLEFT=0;ADJRIGHT=0	0/0:-0,-10.84,-210	0/0:-0,-13.25,-246.5	0/0:-0,-4.21,-84	0/1:-24,-4.21,-60	0/0:-0,-10.84,-212.7	0/0:-0,-7.83,-154	0/0:-0,-10.84,-210.6	0/0:-0,-5.42,-108	0/0:-0,-7.83,-152	0/0:-0,-10.84,-198.7	0/0:-0,-6.62,-132	0/0:-0,-1.2,-24	0/0:-0,-16.86,-322.9	0/0:-0,-6.62,-132	0/0:-0,-7.22,-142	0/0:-0,-4.82,-86.4	0/0:-1.2,-1.2,-1.2	0/0:-0,-8.43,-164.3	0/0:-0,-10.24,-193	0/0:-1.2,-1.2,-1.2	0/0:-0,-13.85,-265.6	0/0:-0,-6.02,-110.5	0/0:-0,-14.45,-286.7	0/0:-0,-7.83,-146	0/0:-0,-6.02,-114	0/0:-0,-10.24,-187.9	0/0:-0,-9.03,-172	0/0:-0,-7.83,-147.5	0/0:-0,-6.02,-120	0/0:-0,-9.03,-176.5	0/0:-0,-16.86,-325.9	0/0:-0,-7.83,-154	0/0:-0,-6.02,-120	0/0:-0.6,-6.62,-120.6	0/0:-0,-17.46,-343	0/0:-0,-7.83,-156	0/0:-0,-12.04,-240	0/0:-0,-4.82,-96	chr7	80568749	80568750	XM_005209707.4	ZFYVE16	+	179259
chr7	80748008	80748265	SVTYPE=Bov-A2;END=80748265;SVLEN=257;ADJLEFT=0;ADJRIGHT=0	0/0:-0,-10.84,-210	0/0:-0,-13.25,-246.5	0/0:-0,-4.21,-84	0/1:-24,-4.21,-60	0/0:-0,-10.84,-212.7	0/0:-0,-7.83,-154	0/0:-0,-10.84,-210.6	0/0:-0,-5.42,-108	0/0:-0,-7.83,-152	0/0:-0,-10.84,-198.7	0/0:-0,-6.62,-132	0/0:-0,-1.2,-24	0/0:-0,-16.86,-322.9	0/0:-0,-6.62,-132	0/0:-0,-7.22,-142	0/0:-0,-4.82,-86.4	0/0:-1.2,-1.2,-1.2	0/0:-0,-8.43,-164.3	0/0:-0,-10.24,-193	0/0:-1.2,-1.2,-1.2	0/0:-0,-13.85,-265.6	0/0:-0,-6.02,-110.5	0/0:-0,-14.45,-286.7	0/0:-0,-7.83,-146	0/0:-0,-6.02,-114	0/0:-0,-10.24,-187.9	0/0:-0,-9.03,-172	0/0:-0,-7.83,-147.5	0/0:-0,-6.02,-120	0/0:-0,-9.03,-176.5	0/0:-0,-16.86,-325.9	0/0:-0,-7.83,-154	0/0:-0,-6.02,-120	0/0:-0.6,-6.62,-120.6	0/0:-0,-17.46,-343	0/0:-0,-7.83,-156	0/0:-0,-12.04,-240	0/0:-0,-4.82,-96	chr7	80545368	80545369	XM_024995301.1	FBLL1	+	202640
chr7	80748008	80748265	SVTYPE=Bov-A2;END=80748265;SVLEN=257;ADJLEFT=0;ADJRIGHT=0	0/0:-0,-10.84,-210	0/0:-0,-13.25,-246.5	0/0:-0,-4.21,-84	0/1:-24,-4.21,-60	0/0:-0,-10.84,-212.7	0/0:-0,-7.83,-154	0/0:-0,-10.84,-210.6	0/0:-0,-5.42,-108	0/0:-0,-7.83,-152	0/0:-0,-10.84,-198.7	0/0:-0,-6.62,-132	0/0:-0,-1.2,-24	0/0:-0,-16.86,-322.9	0/0:-0,-6.62,-132	0/0:-0,-7.22,-142	0/0:-0,-4.82,-86.4	0/0:-1.2,-1.2,-1.2	0/0:-0,-8.43,-164.3	0/0:-0,-10.24,-193	0/0:-1.2,-1.2,-1.2	0/0:-0,-13.85,-265.6	0/0:-0,-6.02,-110.5	0/0:-0,-14.45,-286.7	0/0:-0,-7.83,-146	0/0:-0,-6.02,-114	0/0:-0,-10.24,-187.9	0/0:-0,-9.03,-172	0/0:-0,-7.83,-147.5	0/0:-0,-6.02,-120	0/0:-0,-9.03,-176.5	0/0:-0,-16.86,-325.9	0/0:-0,-7.83,-154	0/0:-0,-6.02,-120	0/0:-0.6,-6.62,-120.6	0/0:-0,-17.46,-343	0/0:-0,-7.83,-156	0/0:-0,-12.04,-240	0/0:-0,-4.82,-96	chr7	80980635	80980636	XR_003035705.1	RASGRF2	+	232371
chr7	80748008	80748265	SVTYPE=Bov-A2;END=80748265;SVLEN=257;ADJLEFT=0;ADJRIGHT=0	0/0:-0,-10.84,-210	0/0:-0,-13.25,-246.5	0/0:-0,-4.21,-84	0/1:-24,-4.21,-60	0/0:-0,-10.84,-212.7	0/0:-0,-7.83,-154	0/0:-0,-10.84,-210.6	0/0:-0,-5.42,-108	0/0:-0,-7.83,-152	0/0:-0,-10.84,-198.7	0/0:-0,-6.62,-132	0/0:-0,-1.2,-24	0/0:-0,-16.86,-322.9	0/0:-0,-6.62,-132	0/0:-0,-7.22,-142	0/0:-0,-4.82,-86.4	0/0:-1.2,-1.2,-1.2	0/0:-0,-8.43,-164.3	0/0:-0,-10.24,-193	0/0:-1.2,-1.2,-1.2	0/0:-0,-13.85,-265.6	0/0:-0,-6.02,-110.5	0/0:-0,-14.45,-286.7	0/0:-0,-7.83,-146	0/0:-0,-6.02,-114	0/0:-0,-10.24,-187.9	0/0:-0,-9.03,-172	0/0:-0,-7.83,-147.5	0/0:-0,-6.02,-120	0/0:-0,-9.03,-176.5	0/0:-0,-16.86,-325.9	0/0:-0,-7.83,-154	0/0:-0,-6.02,-120	0/0:-0.6,-6.62,-120.6	0/0:-0,-17.46,-343	0/0:-0,-7.83,-156	0/0:-0,-12.04,-240	0/0:-0,-4.82,-96	chr7	80503748	80503749	NM_001105338.2	RARS	+	244260
