# Supplementary material for: Ruminant-specific retrotransposons shape regulatory evolution of bovine immunity
Source: HighWire-hosted journal article supplement (doi:10.1101/gr.276241.121), 2022-08-01
Supplement: Supplemental_Table_S16.xlsx [file Supplemental_Table_S16.xlsx]

## Sheet: Description
Supplementarl Table S16
Materials and sequences used in this study
Note that all sequences are provided 5' -> 3'
Sheets
Materials	Reagents and materials used in this study
Genotyping primers	Genotyping primers for validating MER41_BT.IFNAR2 and MER41_BT.IL2RB deletions
RT-qPCR primers	RT-qPCR primers to assay for enAsCas12 expression
Cloning primers	Cloning primers used to validate sequence of plasmids and MER41_BT.IFNAR2 and MER41_BT.IL2RB deletions
gRNA sequences	enAsCas12a gRNA sequences, ordered as gene fragments through Twist Bioscience

## Sheet: Materials
Reagent type (species) or resource	Designation	Source or reference	Identifiers	Additional Information
Cell line (B. taurus)	MDBK	ATCC	CCL-22	Gift from Sara Sawyer
Cell line (B. taurus)	BL3.1	ATCC	CRL-2306
Cell line (H. sapiens)	HEK293T	ATCC	CRL-3216
Cell culture medium	MEM	Gibco	11095098
Cell culture medium	RPMI	Gibco	72400120
Cell culture medium	DMEM	Gibco	10566024
Cell culture medium	Opti-MEM	Gibco	31985070
Chemical compound	1X DPBS	Gibco	14190144
Chemical compound	Penicillin-streptomycin	Gibco	15140122	1X
Cell culture supplement	Fetal bovine serum	Gibco	10437010	10%
Cell culture supplement	MEM nonessential amino acids	Gibco	11140050	1X
Enzyme	Accutase	Stemcell Technologies	07920
Recombinant protein (B. taurus)	Interferon gamma	Kingfisher Biotech	RP0013B-005	100 ng/mL
Chemical compound	Cytiva Ficoll-Paque PLUS	Fisher Scientific	45001749
Chemical compound	Red Blood Cell Lysis Buffer	Roche	11814389001
Recombinant DNA	pRDA_052	Addgene	136474
Recombinant DNA	pRDA_174	Addgene	136476
Enzyme	T4 DNA Ligase Kit	NEB	M0202S
Buffer	T4 DNA Ligase Buffer	NEB	B0202A
Enzyme	BsmBI-v2	NEB	R0739L
Other	Nuclease-free water	Invitrogen	10977023
Biological sample (E. coli)	NEB Stable Competent E. coli	NEB	C3040H
Commercial assay or kit	ZymoPURE II Plasmid Midiprep Kit	Zymo	D4200
Commercial assay or kit	E.Z.N.A. Plasmid Mini Kit	Omega Bio-tek	D694202
Commercial assay or kit	Quick-DNA Miniprep Plus Kit	Zymo	D3024
Commercial assay or kit	FuGENE	Promega	E2311
Recombinant DNA	psPax2	Addgene	12260
Recombinant DNA	pCMV-VSV-G	Addgene	8454
Other	0.45 um PES filter	Life Science Products	CT229749
Chemical compound	Polybrene	??	??
Chemical compound	Blasticidin S HCl	Gibco	A1113903	4 ug/mL
Chemical compound	Puromycin dihydrochloride	Gibco	A1113803	2 ug/mL
Commercial assay or kit	CloneJET PCR Cloning Kit	ThermoFisher Scientific	K1231
Biological sample (E. coli)	NEB 5-alpha Competent E. coli	NEB	C2987H
Chemical compound	DNase I	Worthington Biochemical	LS002006
Commercial assay or kit	Tagment DNA Enzyme and Buffer Small Kit	Illumina	20034197
Recombinant DNA	i5 and i7 indices	IDT		Sequences obtained from https://www.nature.com/articles/s41467-018-05887-x
Commercial assay or kit	NEBNext Ultra II Q5 Master Mix	NEB	M0544S
Chemical compound	SYBR Gold	Invitrogen	S11494
Other	KAPA Pure Beads	Roche	07983280001
Commercial assay or kit	Qubit dsDNA HS Assay Kit	Life Technologies	Q32851
Commercial assay or kit	HSD5000 ScreenTape	Agilent	50675588
Commercial assay or kit	HSD5000 Reagents	Agilent	50675589
Commercial assay or kit	HSD5000 Ladder	Agilent	50675590
Chemical compound	Digitonin	EMD Millipore	300410	0.04%
Antibody	Rabbit anti-mouse IgG	Abcam	ab46540	1:100
Antibody	Rabbit anti-H3K27ac	EMD Millipore	MABE647	1:100
Antibody	Rabbit anti-POLR2A-Ser5	Cell Signaling	13523S	1:50
Antibody	Rabbit anti-STAT1	Cohesion Biosciences	3322	1:100
Antibody	Rabbit anti-pSTAT1-Ser727	Active Motif	39634	1:100
Recombinant protein	pA-MNase			Gift from Steve Henikoff, 700 ng/mL
Commercial assay or kit	KAPA HyperPrep Kit	Roche	KK8502
Commercial assay or kit	KAPA Single-Index Adapter Kit (Set A)	Roche	08005699001
Commercial assay or kit	KAPA Single-Index Adapter Kit (Set B)	Roche	08005699001
Chemical compound	SDS	Fisher Bioreagents	10552785
Chemical compound	Proteinase-K	Thermo Scientific	EO0491
Commercial assay or kit	Quick-RNA Miniprep Plus Kit	Zymo	R1057
Chemical compound	TRIzol Reagent	Invitrogen	11596026
Commercial assay or kit	Direct-zol RNA Miniprep Plus Kit	Zymo	R2071
Commercial assay or kit	High Sensitivity RNA ScreenTape	Agilent	50675579
Commercial assay or kit	High Sensitivity RNA ScreenTape Ladder	Agilent	50675581
Commercial assay or kit	High Sensitivity RNA ScreenTape Sample Buffer	Agilent	50675580
Commercial assay or kit	KAPA mRNA HyperPrep Kit	Roche	08098123702
Commercial assay or kit	KAPA Unique Dual-Indexed Adapter Kit	Roche	KK8727
Commercial assay or kit	Luna Universal One-Step RT-qPCR Kit	NEB	E3005S

## Sheet: Genotyping primers
Target gene	Flanking fwd	Flanking rev	Internal fwd	Internal rev
LOC510185	CGCCATCACATCCACGAGTGG	TGGGGCAGAGGGACTGTAATAGG	AGTTCCTGGAAACCTCCTTCCCAA	CTTGGTCTTTTGCCTCTGGGTATG
IFNAR2	ATGACTCATCGAGAGCACAGT	GCCCAGTTCTACTTAGGTCGG	GACACAGCCCTAGGACATAACA	TTGACTCATCCGCCGTCTTG
enAsCas12a (pRDA_174)	GATGATCCACTACCAGGCCG	CCTCCCACTTTCTCTGCTGG	N/A	N/A

## Sheet: RT-qPCR primers
Target gene	Fwd primer	Rev primer
enAsCas12a	GATGATCCACTACCAGGCCG	CCTCCCACTTTCTCTGCTGG
CTCF	TGTGGAGATTGAACCCGAGC	CTGAATGATGGCTGTTGGCTG
IL2RB	GGTCCCTGCAGAAACCAAGAA	ATAGCCTGATGCACCGGAAG
LOC510185	GCCTGAACACAGGGCTCC	GATGAGGAGGGACAGACAGC
IFNAR2	TCGTATGTTGCGCCTGTTCT	GTCCGTCGTGTTTACCCACA

## Sheet: Cloning primers
Construct	Fwd primer	Rev primer
pJET	CGACTCACTATAGGGAGAGCGGC	AAGAACATCGATTTTCCATGGCAG
pRDA_174	TCAAGCCTCAGACAGTGGTTC	N/A
pRDA_052	GACTATCATATGCTTACCGT	N/A

## Sheet: gRNA sequences
Target gene	PAM + Guide #1	PAM + Guide #2	Full oligonucleotide sequence
LOC510185	TTTACATATGAAATTACTCAGTCCATA	TTTAGCTTCTGATCGAAGATCAAGG	cctgggacagCGTCTCAAGATTAATTTCTACTCTTGTAGATCATATGAAATTACTCAGTCCATATAATTTCTACTGTCGTAGATGCTTCTGATCGAAGATCAAGGTTTTTTTTGAATCGAGACGagccgctggtaaacactccatgaccccggctctccattgatgccacggcgattgttggagagccagcagcgactgcaaacgtcagatcagagtaatactagcaagcgataagtccctaactggttgtggccttctgtagagtgaacttcaccacatatgctgtctctggcacgtgg
IFNAR2	TTTCCTAGAAAATATTCAGTCCAACAG	GTTGCAAGTAGTGTAAGCGTAAGTCGC	cctgggacagCGTCTCAAGATTAATTTCTACTCTTGTAGATCTAGAAAATATTCAGTCCAACAGTAATTTCTACTGTCGTAGATCAAGTAGTGTAAGCGTAAGTCGCTTTTTTTTGAATCGAGACGagccgctggtaaacactccatgaccccggctctccattgatgccacggcgattgttggagagccagcagcgactgcaaacgtcagatcagagtaatactagcaagcgataagtccctaactggttgtggccttctgtagagtgaacttcaccacatatgctgtctctggcacgt
