# Supplementary material for: Ruminant-specific retrotransposons shape regulatory evolution of bovine immunity
Source: HighWire-hosted journal article supplement (doi:10.1101/gr.276241.121), 2022-08-01
Supplement: Supplemental_Table_S17.xlsx [file Supplemental_Table_S17.xlsx]

## Sheet: Description
Supplemental Table S17
Identifying information for all publicly available whole genome sequencing data analyzed in this study
Number of aligned fragments & coverage represent values after QUAL < 10 filter and merging
Sheets
Sample information	Provides information (subspecies, cell type, sampling location, coverage) for each WGS sample reanalyzed in this study
Sample accessions	Lists all accession numbers for each sample

## Sheet: Sample information
Sample	Subspecies	BioProject ID	Cell type	Sample origin place	Number of aligned fragments	Estimated coverage
Angus4	B. t. taurus x B. t. taurus	PRJNA324822	Semen	n.d.	333727489	17.6
Ankole4	B. t. indicus x B. t. indicus	PRJEB1829	n.d.	Masindi, Uganda (Closest city)	386668249	13.6
Bashan3	B. t. taurus x B. t. indicus	PRJNA379859	Ear	Xixiang, Hanzhong, Shaanxi, China	251332332	13.5
Beefmaster2	B. t. taurus x B. t. indicus	PRJNA324822	Semen	n.d.	272676768	14.3
BL3	B. t. taurus x B. t. taurus	PRJNA325058	B lymphocyte (hyperdiploid, N=65)	n.d.	251550214	13
Braunvieh1	B. t. taurus x B. t. taurus	PRJNA324822	Semen	n.d.	319521274	16.8
Charolais2	B. t. taurus x B. t. taurus	PRJNA324822	Semen	n.d.	301969385	15.7
Chianina2	B. t. taurus x B. t. taurus	PRJNA324822	Semen	n.d.	300075288	15.8
Corriente4	B. t. taurus x B. t. taurus	PRJNA324822	Whole blood	n.d.	339666944	17.8
Devon	B. t. taurus x B. t. taurus	PRJNA176557	n.d.	Cork, UK	380169032	13.3
Gelbvieh4	B. t. taurus x B. t. taurus	PRJNA324822	Semen	n.d.	310193591	16.2
Gir1	B. t. indicus x B. t. indicus	PRJNA277147	Semen	Amblash, Gujarat, India	403084320	14.1
Hanwoo8	B. t. taurus x B. t. taurus	PRJNA210519	Blood	Chuncheon, Kangwon-do, Korea	349269163	12.4
Hereford6	B. t. taurus x B. t. taurus	PRJNA324822	Semen	n.d.	299104632	15.8
Holstein	B. t. taurus x B. t. taurus	PRJNA176557	n.d.	De Kooy, North Holland, Holland	369868359	13.1
Jersey	B. t. taurus x B. t. taurus	PRJNA277147	Semen	Channel Island of Jersey, UK	285887412	10.1
Jian4	B. t. indicus x B. t. indicus	PRJNA379859	Ear	Ji'an, Jiangxi, China	246306048	13.2
Kazakh3	B. t. taurus x B. t. taurus	PRJNA379859	Ear	Yining, Yili, Xinjing, China	272070967	14.6
Limousin2	B. t. taurus x B. t. taurus	PRJNA324822	Semen	n.d.	365595235	19.2
Luxi1	B. t. taurus x B. t. indicus	PRJNA379859	Blood	Jining, Shandong, China	245309410	13.2
MaineAnjou4	B. t. taurus x B. t. taurus	PRJNA324822	Semen	n.d.	304807999	16
Mishima1	B. t. taurus x B. t. taurus	PRJDB2660	Blood	Mishima Island, Japan	383328908	12.7
Mongolian4	B. t. taurus x B. t. taurus	PRJNA379859	Ear	Kuerl, Bayingolin, Xinjiang, China	246988311	13.3
Nelore4	B. t. indicus x B. t. indicus	PRJNA277147	Semen	Nelore, Andhra, India	393663619	13.4
Nganda	B. t. taurus x B. t. indicus	PRJEB1829	n.d.	Masaka, Uganda (Closest city)	385024084	13.7
Nsongora	B. t. taurus x B. t. indicus	PRJEB1829	n.d.	Kasese, Uganda (Closest city)	426304856	15.2
RedAngus2	B. t. taurus x B. t. taurus	PRJNA324822	Semen	n.d.	299288443	15.8
Salers1	B. t. taurus x B. t. taurus	PRJNA324822	Semen	n.d.	305136834	16.1
SantaGertrudis2	B. t. taurus x B. t. indicus	PRJNA324822	Semen	n.d.	314057935	15.9
Shorthorn4	B. t. taurus x B. t. taurus	PRJNA324822	Semen	n.d.	299772705	15.8
ShorthornZebu1	B. t. taurus x B. t. indicus	PRJEB1829	n.d.	Mubende, Uganda (Closest city)	399320432	14.2
Simmental5	B. t. taurus x B. t. taurus	PRJNA324822	Semen	n.d.	358867566	18.8
Tarentaise1	B. t. taurus x B. t. taurus	PRJNA324822	Semen	n.d.	300374493	15.8
TexasLonghorn4	B. t. taurus x B. t. taurus	PRJNA324822	Semen	n.d.	299315308	15.7
Tibetan9	B. t. taurus x B. t. taurus	PRJNA379859	Ear	Changdu, Xizang, China	290707949	15.6
Weining3	B. t. taurus x B. t. indicus	PRJNA379859	Ear	Weining, Bijie, Guizhou, China	236273284	12.6
Wenshan7	B. t. indicus x B. t. indicus	PRJNA379859	Ear	Guangnan, Wenshan, China	331338247	17.6
Yanbian	B. t. taurus x B. t. taurus	PRJNA379859	Blood	Yanbian, Jilin, China	214542577	11.5

## Sheet: Sample accessions
Sample	Accession ID	BioProject ID
Angus4	SRR4005114	PRJNA324822
Angus4	SRR4005115	PRJNA324822
Angus4	SRR4005116	PRJNA324822
Angus4	SRR4005117	PRJNA324822
Angus4	SRR4005118	PRJNA324822
Angus4	SRR4005119	PRJNA324822
Angus4	SRR4005121	PRJNA324822
Angus4	SRR4005122	PRJNA324822
Angus4	SRR4005123	PRJNA324822
Angus4	SRR4005124	PRJNA324822
Angus4	SRR4005125	PRJNA324822
Angus4	SRR4005126	PRJNA324822
Ankole4	ERR320251	PRJEB1829
Bashan3	SRR5507207	PRJNA379859
Beefmaster2	SRR4003236	PRJNA324822
Beefmaster2	SRR4003237	PRJNA324822
Beefmaster2	SRR4003238	PRJNA324822
Beefmaster2	SRR4003239	PRJNA324822
Beefmaster2	SRR4003240	PRJNA324822
Beefmaster2	SRR4003241	PRJNA324822
Beefmaster2	SRR4003242	PRJNA324822
Beefmaster2	SRR4003244	PRJNA324822
Beefmaster2	SRR4003245	PRJNA324822
Beefmaster2	SRR4003246	PRJNA324822
Beefmaster2	SRR4003247	PRJNA324822
Beefmaster2	SRR4003248	PRJNA324822
Beefmaster2	SRR4003249	PRJNA324822
Beefmaster2	SRR4003250	PRJNA324822
Beefmaster2	SRR4003251	PRJNA324822
BL3	SRR7790708	PRJNA325058
Braunvieh1	SRR4001687	PRJNA324822
Braunvieh1	SRR4001689	PRJNA324822
Braunvieh1	SRR4001690	PRJNA324822
Braunvieh1	SRR4001691	PRJNA324822
Braunvieh1	SRR4001692	PRJNA324822
Braunvieh1	SRR4001693	PRJNA324822
Braunvieh1	SRR4001694	PRJNA324822
Braunvieh1	SRR4001695	PRJNA324822
Braunvieh1	SRR4001696	PRJNA324822
Braunvieh1	SRR4001697	PRJNA324822
Braunvieh1	SRR4001698	PRJNA324822
Braunvieh1	SRR4001700	PRJNA324822
Braunvieh1	SRR4001701	PRJNA324822
Braunvieh1	SRR4001702	PRJNA324822
Braunvieh1	SRR4001703	PRJNA324822
Braunvieh1	SRR4001704	PRJNA324822
Charolais2	SRR4004691	PRJNA324822
Charolais2	SRR4004693	PRJNA324822
Charolais2	SRR4004694	PRJNA324822
Charolais2	SRR4004695	PRJNA324822
Charolais2	SRR4004696	PRJNA324822
Charolais2	SRR4004697	PRJNA324822
Charolais2	SRR4004698	PRJNA324822
Charolais2	SRR4004699	PRJNA324822
Charolais2	SRR4004700	PRJNA324822
Charolais2	SRR4004701	PRJNA324822
Charolais2	SRR4004702	PRJNA324822
Charolais2	SRR4004704	PRJNA324822
Chianina2	SRR4001750	PRJNA324822
Chianina2	SRR4001751	PRJNA324822
Chianina2	SRR4001752	PRJNA324822
Chianina2	SRR4001753	PRJNA324822
Chianina2	SRR4001754	PRJNA324822
Chianina2	SRR4001756	PRJNA324822
Chianina2	SRR4001757	PRJNA324822
Chianina2	SRR4001758	PRJNA324822
Chianina2	SRR4001759	PRJNA324822
Chianina2	SRR4001760	PRJNA324822
Chianina2	SRR4001761	PRJNA324822
Chianina2	SRR4001762	PRJNA324822
Chianina2	SRR4001763	PRJNA324822
Chianina2	SRR4001764	PRJNA324822
Chianina2	SRR4001765	PRJNA324822
Chianina2	SRR4001767	PRJNA324822
Chianina2	SRR4001768	PRJNA324822
Chianina2	SRR4001769	PRJNA324822
Chianina2	SRR4001770	PRJNA324822
Chianina2	SRR4001771	PRJNA324822
Corriente4	SRR4002051	PRJNA324822
Corriente4	SRR4002053	PRJNA324822
Corriente4	SRR4002054	PRJNA324822
Corriente4	SRR4002055	PRJNA324822
Corriente4	SRR4002056	PRJNA324822
Corriente4	SRR4002057	PRJNA324822
Corriente4	SRR4002058	PRJNA324822
Corriente4	SRR4002059	PRJNA324822
Corriente4	SRR4002060	PRJNA324822
Corriente4	SRR4002061	PRJNA324822
Corriente4	SRR4002062	PRJNA324822
Corriente4	SRR4002064	PRJNA324822
Corriente4	SRR4002065	PRJNA324822
Corriente4	SRR4002066	PRJNA324822
Corriente4	SRR4002067	PRJNA324822
Corriente4	SRR4002068	PRJNA324822
Corriente4	SRR4002069	PRJNA324822
Corriente4	SRR4002070	PRJNA324822
Corriente4	SRR4002071	PRJNA324822
Corriente4	SRR4002072	PRJNA324822
Corriente4	SRR4002073	PRJNA324822
Corriente4	SRR4002075	PRJNA324822
Corriente4	SRR4002076	PRJNA324822
Corriente4	SRR4002077	PRJNA324822
Corriente4	SRR4002078	PRJNA324822
Corriente4	SRR4002079	PRJNA324822
Corriente4	SRR4002080	PRJNA324822
Corriente4	SRR4002081	PRJNA324822
Corriente4	SRR4002082	PRJNA324822
Corriente4	SRR4002083	PRJNA324822
Corriente4	SRR4002084	PRJNA324822
Corriente4	SRR4002086	PRJNA324822
Devon	SRR1346378	PRJNA176557
Gelbvieh4	SRR4003316	PRJNA324822
Gelbvieh4	SRR4003317	PRJNA324822
Gelbvieh4	SRR4003318	PRJNA324822
Gelbvieh4	SRR4003319	PRJNA324822
Gelbvieh4	SRR4003320	PRJNA324822
Gelbvieh4	SRR4003322	PRJNA324822
Gelbvieh4	SRR4003323	PRJNA324822
Gelbvieh4	SRR4003324	PRJNA324822
Gir1	SRR2016752	PRJNA277147
Hanwoo8	SRR934435	PRJNA210519
Hereford6	SRR4004922	PRJNA324822
Hereford6	SRR4004923	PRJNA324822
Hereford6	SRR4004924	PRJNA324822
Hereford6	SRR4004925	PRJNA324822
Hereford6	SRR4004926	PRJNA324822
Hereford6	SRR4004927	PRJNA324822
Hereford6	SRR4004929	PRJNA324822
Hereford6	SRR4004930	PRJNA324822
Hereford6	SRR4004931	PRJNA324822
Hereford6	SRR4004932	PRJNA324822
Hereford6	SRR4004933	PRJNA324822
Hereford6	SRR4004934	PRJNA324822
Hereford6	SRR4004935	PRJNA324822
Hereford6	SRR4004936	PRJNA324822
Hereford6	SRR4004937	PRJNA324822
Hereford6	SRR4004938	PRJNA324822
Hereford6	SRR4004940	PRJNA324822
Hereford6	SRR4004941	PRJNA324822
Hereford6	SRR4004942	PRJNA324822
Hereford6	SRR4004943	PRJNA324822
Hereford6	SRR4004944	PRJNA324822
Hereford6	SRR4004945	PRJNA324822
Hereford6	SRR4004946	PRJNA324822
Hereford6	SRR4004947	PRJNA324822
Holstein	SRR1346386	PRJNA176557
Jersey	SRR2016776	PRJNA277147
Jian4	SRR5507279	PRJNA379859
Kazakh3	SRR5507258	PRJNA379859
Limousin2	SRR4004895	PRJNA324822
Limousin2	SRR4004896	PRJNA324822
Limousin2	SRR4004897	PRJNA324822
Limousin2	SRR4004898	PRJNA324822
Limousin2	SRR4004899	PRJNA324822
Limousin2	SRR4004900	PRJNA324822
Limousin2	SRR4004901	PRJNA324822
Limousin2	SRR4004902	PRJNA324822
Limousin2	SRR4004903	PRJNA324822
Limousin2	SRR4004904	PRJNA324822
Limousin2	SRR4004906	PRJNA324822
Limousin2	SRR4004907	PRJNA324822
Luxi1	SRR5507242	PRJNA379859
MaineAnjou4	SRR4001975	PRJNA324822
MaineAnjou4	SRR4001976	PRJNA324822
MaineAnjou4	SRR4001978	PRJNA324822
MaineAnjou4	SRR4001979	PRJNA324822
MaineAnjou4	SRR4001980	PRJNA324822
MaineAnjou4	SRR4001981	PRJNA324822
MaineAnjou4	SRR4001982	PRJNA324822
MaineAnjou4	SRR4001983	PRJNA324822
MaineAnjou4	SRR4001984	PRJNA324822
MaineAnjou4	SRR4001985	PRJNA324822
MaineAnjou4	SRR4001986	PRJNA324822
MaineAnjou4	SRR4001987	PRJNA324822
MaineAnjou4	SRR4001989	PRJNA324822
MaineAnjou4	SRR4001990	PRJNA324822
MaineAnjou4	SRR4001991	PRJNA324822
MaineAnjou4	SRR4001992	PRJNA324822
Mishima1	DRR001771	PRJDB2660
Mishima1	DRR001778	PRJDB2660
Mishima1	DRR001781	PRJDB2660
Mongolian4	SRR5507264	PRJNA379859
Nelore4	SRR2016762	PRJNA277147
Nganda	ERR320263	PRJEB1829
Nsongora	ERR320256	PRJEB1829
RedAngus2	SRR4004994	PRJNA324822
RedAngus2	SRR4005021	PRJNA324822
RedAngus2	SRR4005057	PRJNA324822
RedAngus2	SRR4005076	PRJNA324822
RedAngus2	SRR4005087	PRJNA324822
RedAngus2	SRR4005098	PRJNA324822
RedAngus2	SRR4005109	PRJNA324822
RedAngus2	SRR4005120	PRJNA324822
RedAngus2	SRR4005131	PRJNA324822
RedAngus2	SRR4005140	PRJNA324822
RedAngus2	SRR4005142	PRJNA324822
RedAngus2	SRR4005143	PRJNA324822
RedAngus2	SRR4005144	PRJNA324822
RedAngus2	SRR4005145	PRJNA324822
RedAngus2	SRR4005146	PRJNA324822
RedAngus2	SRR4005147	PRJNA324822
RedAngus2	SRR4005148	PRJNA324822
RedAngus2	SRR4005149	PRJNA324822
RedAngus2	SRR4005150	PRJNA324822
RedAngus2	SRR4005151	PRJNA324822
RedAngus2	SRR4005153	PRJNA324822
RedAngus2	SRR4005154	PRJNA324822
RedAngus2	SRR4005155	PRJNA324822
RedAngus2	SRR4005156	PRJNA324822
RedAngus2	SRR4005157	PRJNA324822
RedAngus2	SRR4005158	PRJNA324822
RedAngus2	SRR4005159	PRJNA324822
RedAngus2	SRR4005160	PRJNA324822
Salers1	SRR4003084	PRJNA324822
Salers1	SRR4003085	PRJNA324822
Salers1	SRR4003087	PRJNA324822
Salers1	SRR4003088	PRJNA324822
Salers1	SRR4003090	PRJNA324822
Salers1	SRR4003091	PRJNA324822
Salers1	SRR4003092	PRJNA324822
Salers1	SRR4003093	PRJNA324822
Salers1	SRR4003094	PRJNA324822
Salers1	SRR4003096	PRJNA324822
Salers1	SRR4003097	PRJNA324822
Salers1	SRR4003098	PRJNA324822
Salers1	SRR4003099	PRJNA324822
Salers1	SRR4003100	PRJNA324822
Salers1	SRR4003102	PRJNA324822
Salers1	SRR4003103	PRJNA324822
Salers1	SRR4003104	PRJNA324822
Salers1	SRR4003105	PRJNA324822
Salers1	SRR4003106	PRJNA324822
Salers1	SRR4003107	PRJNA324822
SantaGertrudis2	SRR4001820	PRJNA324822
SantaGertrudis2	SRR4001822	PRJNA324822
SantaGertrudis2	SRR4001823	PRJNA324822
SantaGertrudis2	SRR4001824	PRJNA324822
SantaGertrudis2	SRR4001825	PRJNA324822
SantaGertrudis2	SRR4001826	PRJNA324822
SantaGertrudis2	SRR4001827	PRJNA324822
SantaGertrudis2	SRR4001828	PRJNA324822
SantaGertrudis2	SRR4001829	PRJNA324822
SantaGertrudis2	SRR4001830	PRJNA324822
SantaGertrudis2	SRR4001831	PRJNA324822
SantaGertrudis2	SRR4001834	PRJNA324822
Shorthorn4	SRR4002963	PRJNA324822
Shorthorn4	SRR4002974	PRJNA324822
Shorthorn4	SRR4002985	PRJNA324822
Shorthorn4	SRR4002996	PRJNA324822
Shorthorn4	SRR4003007	PRJNA324822
Shorthorn4	SRR4003018	PRJNA324822
Shorthorn4	SRR4003029	PRJNA324822
Shorthorn4	SRR4003040	PRJNA324822
Shorthorn4	SRR4003051	PRJNA324822
Shorthorn4	SRR4003063	PRJNA324822
Shorthorn4	SRR4003076	PRJNA324822
Shorthorn4	SRR4003089	PRJNA324822
Shorthorn4	SRR4003101	PRJNA324822
Shorthorn4	SRR4003112	PRJNA324822
Shorthorn4	SRR4003123	PRJNA324822
Shorthorn4	SRR4003134	PRJNA324822
Shorthorn4	SRR4003146	PRJNA324822
Shorthorn4	SRR4003160	PRJNA324822
Shorthorn4	SRR4003173	PRJNA324822
Shorthorn4	SRR4003187	PRJNA324822
Shorthorn4	SRR4003199	PRJNA324822
Shorthorn4	SRR4003210	PRJNA324822
Shorthorn4	SRR4003221	PRJNA324822
Shorthorn4	SRR4003232	PRJNA324822
Shorthorn4	SRR4003243	PRJNA324822
Shorthorn4	SRR4003254	PRJNA324822
Shorthorn4	SRR4003265	PRJNA324822
Shorthorn4	SRR4003276	PRJNA324822
ShorthornZebu1	ERR320241	PRJEB1829
Simmental5	SRR4004755	PRJNA324822
Simmental5	SRR4004756	PRJNA324822
Simmental5	SRR4004757	PRJNA324822
Simmental5	SRR4004758	PRJNA324822
Simmental5	SRR4004761	PRJNA324822
Simmental5	SRR4004762	PRJNA324822
Simmental5	SRR4004763	PRJNA324822
Simmental5	SRR4004764	PRJNA324822
Simmental5	SRR4004765	PRJNA324822
Simmental5	SRR4004766	PRJNA324822
Simmental5	SRR4004767	PRJNA324822
Simmental5	SRR4004768	PRJNA324822
Tarentaise1	SRR4001932	PRJNA324822
Tarentaise1	SRR4001944	PRJNA324822
Tarentaise1	SRR4001955	PRJNA324822
Tarentaise1	SRR4001966	PRJNA324822
Tarentaise1	SRR4001977	PRJNA324822
Tarentaise1	SRR4001988	PRJNA324822
Tarentaise1	SRR4001999	PRJNA324822
Tarentaise1	SRR4002010	PRJNA324822
Tarentaise1	SRR4002021	PRJNA324822
Tarentaise1	SRR4002032	PRJNA324822
Tarentaise1	SRR4002040	PRJNA324822
Tarentaise1	SRR4002042	PRJNA324822
Tarentaise1	SRR4002043	PRJNA324822
Tarentaise1	SRR4002044	PRJNA324822
Tarentaise1	SRR4002045	PRJNA324822
Tarentaise1	SRR4002046	PRJNA324822
Tarentaise1	SRR4002047	PRJNA324822
Tarentaise1	SRR4002048	PRJNA324822
Tarentaise1	SRR4002049	PRJNA324822
Tarentaise1	SRR4002050	PRJNA324822
TexasLonghorn4	SRR4001865	PRJNA324822
TexasLonghorn4	SRR4001867	PRJNA324822
TexasLonghorn4	SRR4001868	PRJNA324822
TexasLonghorn4	SRR4001869	PRJNA324822
TexasLonghorn4	SRR4001870	PRJNA324822
TexasLonghorn4	SRR4001871	PRJNA324822
TexasLonghorn4	SRR4001872	PRJNA324822
TexasLonghorn4	SRR4001873	PRJNA324822
TexasLonghorn4	SRR4001874	PRJNA324822
TexasLonghorn4	SRR4001875	PRJNA324822
TexasLonghorn4	SRR4001876	PRJNA324822
TexasLonghorn4	SRR4001878	PRJNA324822
TexasLonghorn4	SRR4001879	PRJNA324822
TexasLonghorn4	SRR4001880	PRJNA324822
TexasLonghorn4	SRR4001881	PRJNA324822
TexasLonghorn4	SRR4001882	PRJNA324822
TexasLonghorn4	SRR4001883	PRJNA324822
TexasLonghorn4	SRR4001884	PRJNA324822
TexasLonghorn4	SRR4001885	PRJNA324822
TexasLonghorn4	SRR4001886	PRJNA324822
Tibetan9	SRR5507243	PRJNA379859
Weining3	SRR5507202	PRJNA379859
Wenshan7	SRR6024578	PRJNA379859
Yanbian	SRR5507273	PRJNA379859
